# Supplementary material for: Human ex vivo prostate tissue model system identifies ING3 as an oncoprotein
Source: PubMed Central journal article supplement (PMC5846061; doi:10.1038/bjc.2017.447), 2018-01-30
Supplement: bjc2017447x1.pdf [file bjc2017447x1.pdf]

## Supplementary Figure and Table legends

**Figure S1:** (A) The Cancer Genome Atlas (TCGA) database was accessed through [oncomine.org](http://oncomine.org) and the copy number of *ING3* from paired normal tissue (i.e. blood or prostate gland; n = 207) and prostate adenocarcinoma (n = 169) plotted (\*\*\*) indicates a p-value < 0.001). (B) *ING3* copy number counts from the TCGA prostate cancer dataset between patients who achieved complete or partial remission during androgen ablation (n = 185) and patients who experienced no remission (n = 34). (C) Kaplan-Meier survival curve of patients in the TCGA prostate cancer dataset based on patients with low (n = 46) or high (n = 24) *ING3* counts (\* indicates a p-value of 0.02). (D-F) TMA from main Figure 1A were stained for indicated proliferation markers and plotted against *ING3* H-score.

**Figure S2:** The microarray data for each gene was plotted for both si*ING3* no. 1 and si*ING3* no. 2.

**Figure S3:** Proliferation of breast, ovarian, and prostate cancer cell lines. Proliferation of control (Scramble siRNA) or *ING3*-silenced (si*ING3* no.1) CWR22Rv1, LNCaP-AI, MCF7, MX-1, PC3, PEO1, and PEO4 cells was monitored for 5 consecutive days by IncuCyte. Data was analysed using Wilcoxon signed-rank test.

**Figure S4:** Kegg pathway analysis.

**Figure S5:** *ING3* associates with H3K4<sup>me3</sup> at transcriptional start sites. ChIP experiments of *ING3* at the transcriptional start site (TSS) of *CCND1* and *PCNA* were conducted using an  $\alpha$ -FLAG antibody. Similarly, ChIP experiments of *ING3* and AR at the ARE<sub>III</sub> of *PSA* and the ARE of *KLK2* were conducted using  $\alpha$ -FLAG or  $\alpha$ -AR antibodies, respectively.

**Figure S6:** Structure prediction of *ING3*<sub>PHD</sub> with (A) or without (B) the PNEPR sequence preceding the PHD domain.

**Figure S7:** The TCGA database was analysed for the expression of *ING3* and cell cycle genes in prostate cancer tissues and the expression of genes that correlated with the expression of *ING3* was plotted.

**Figure S8:** The cBioPortal website was queried for alterations in *ING* proteins in various cancers.

**Table S1:** List of primers used for real-time qPCR gene expression analysis.

**Table S2:** List of primers used for real-time qPCR analysis of ChIP.

**Table S3:** Complete list of genes from the si*ING3* microarray survey.

**Table S4:** Summary of characteristics of cell lines used in our studies.

Figure S1

A)

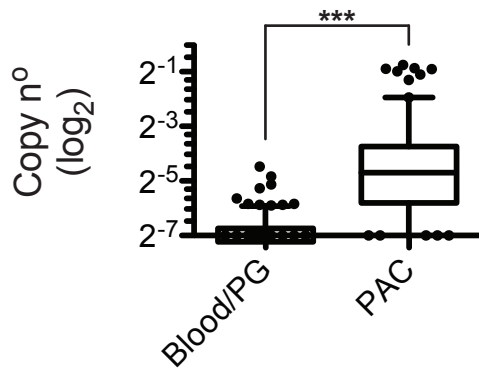

B)

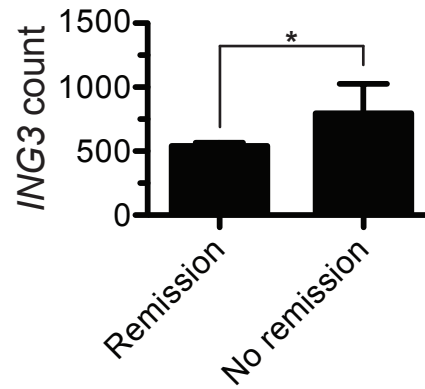

C)

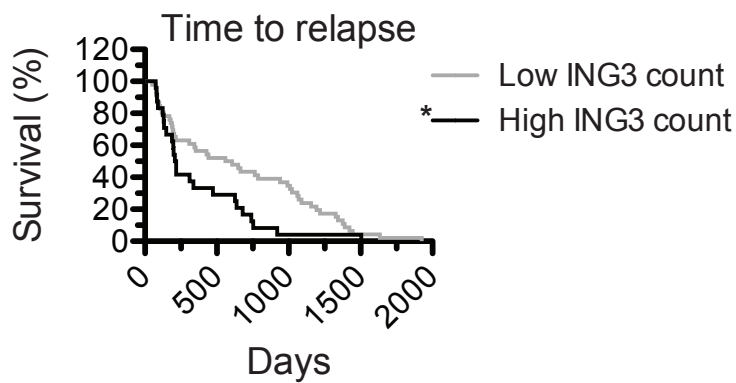

D)

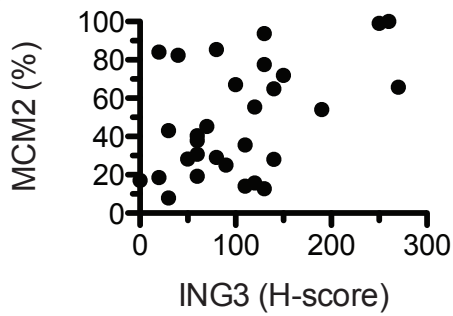

E)

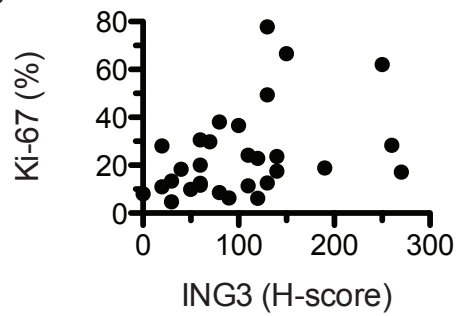

F)

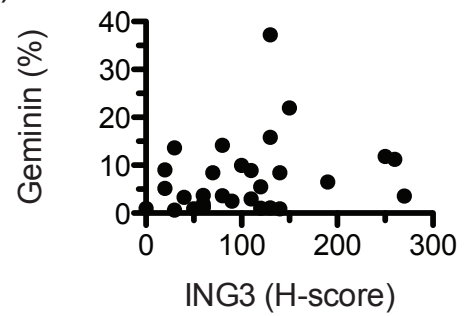

Figure S2

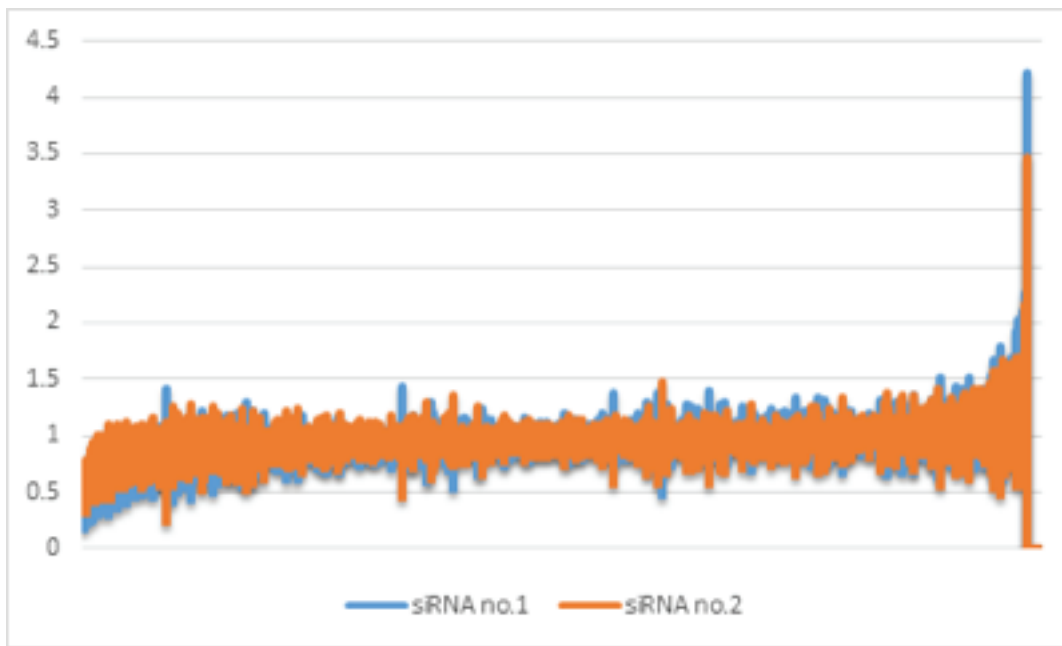

Figure S3

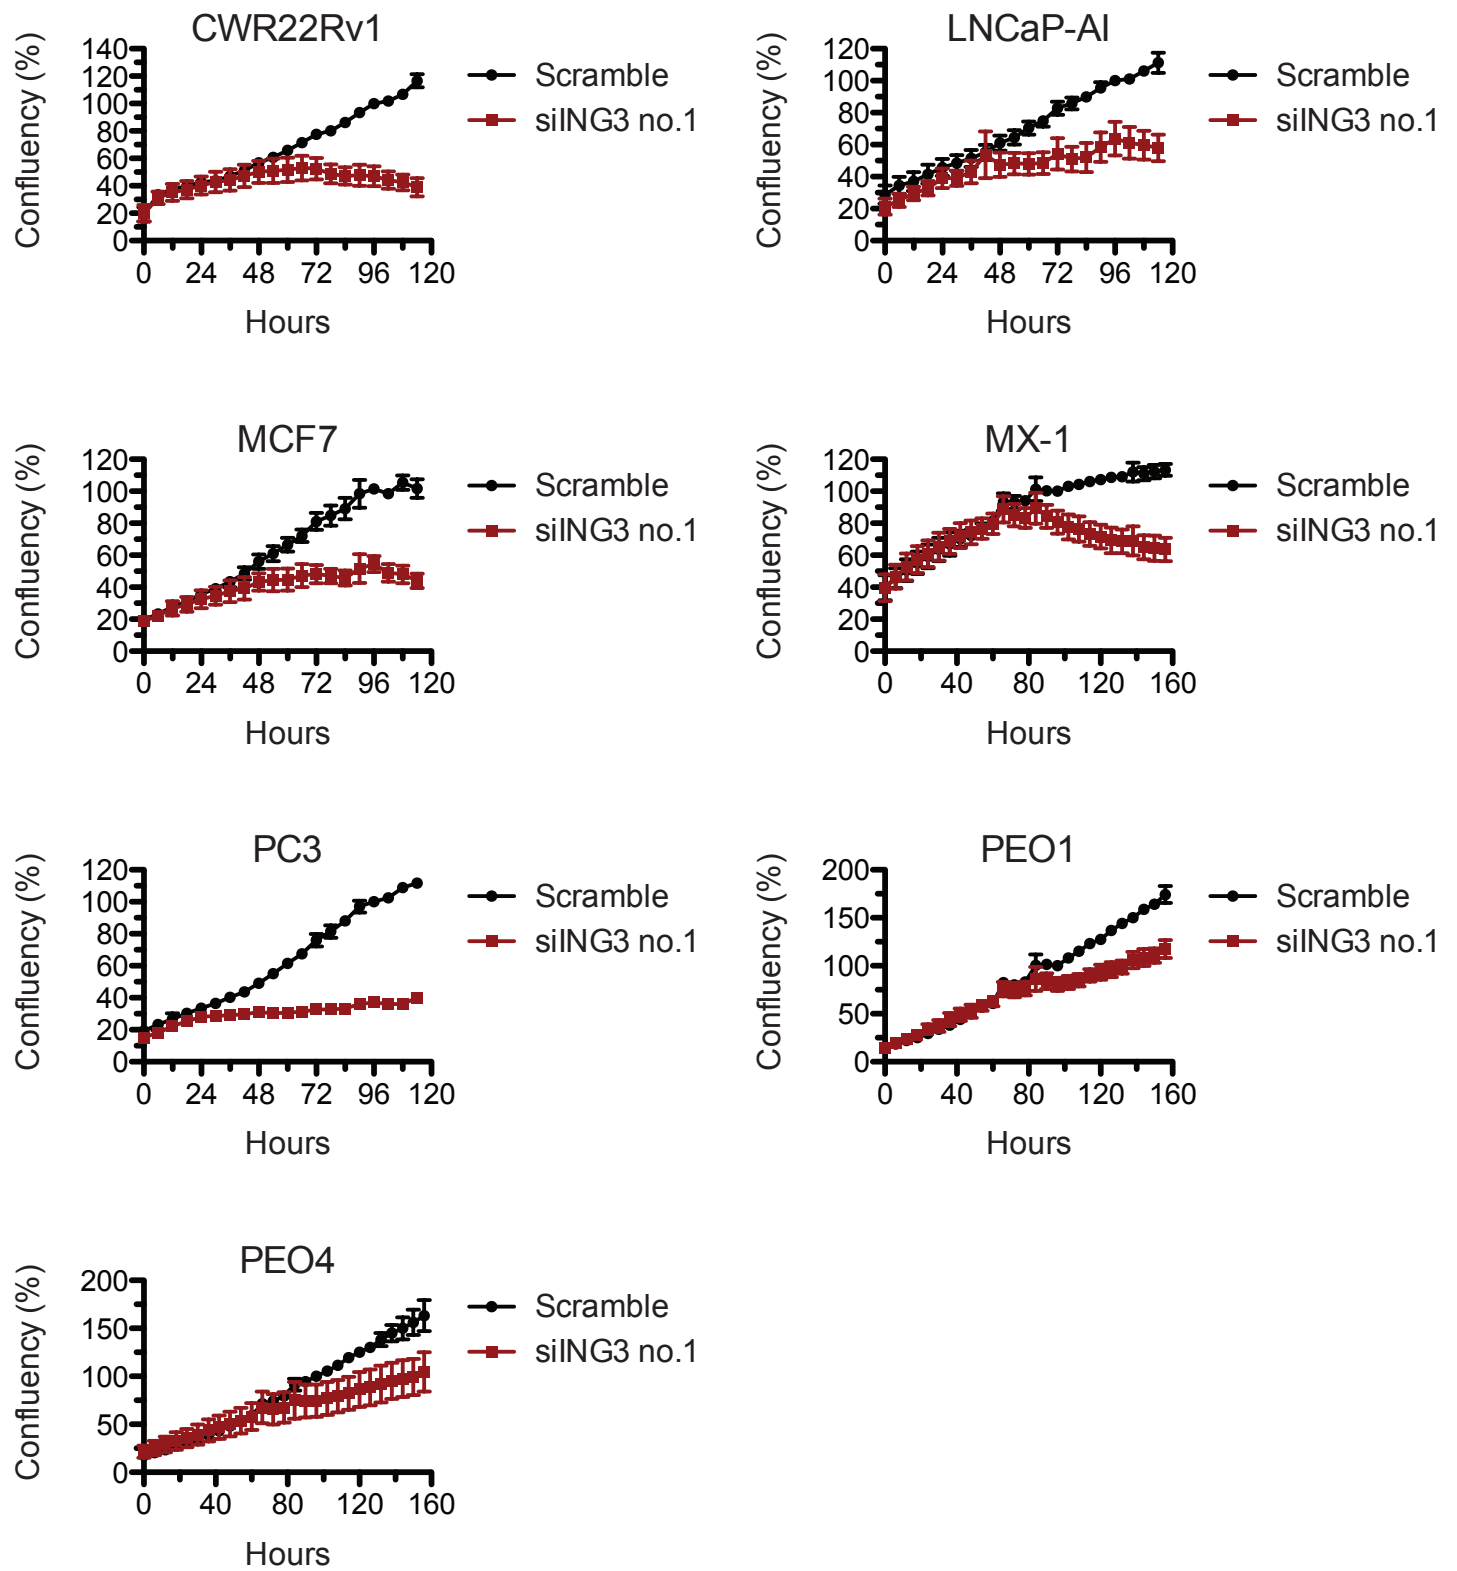

Figure S4

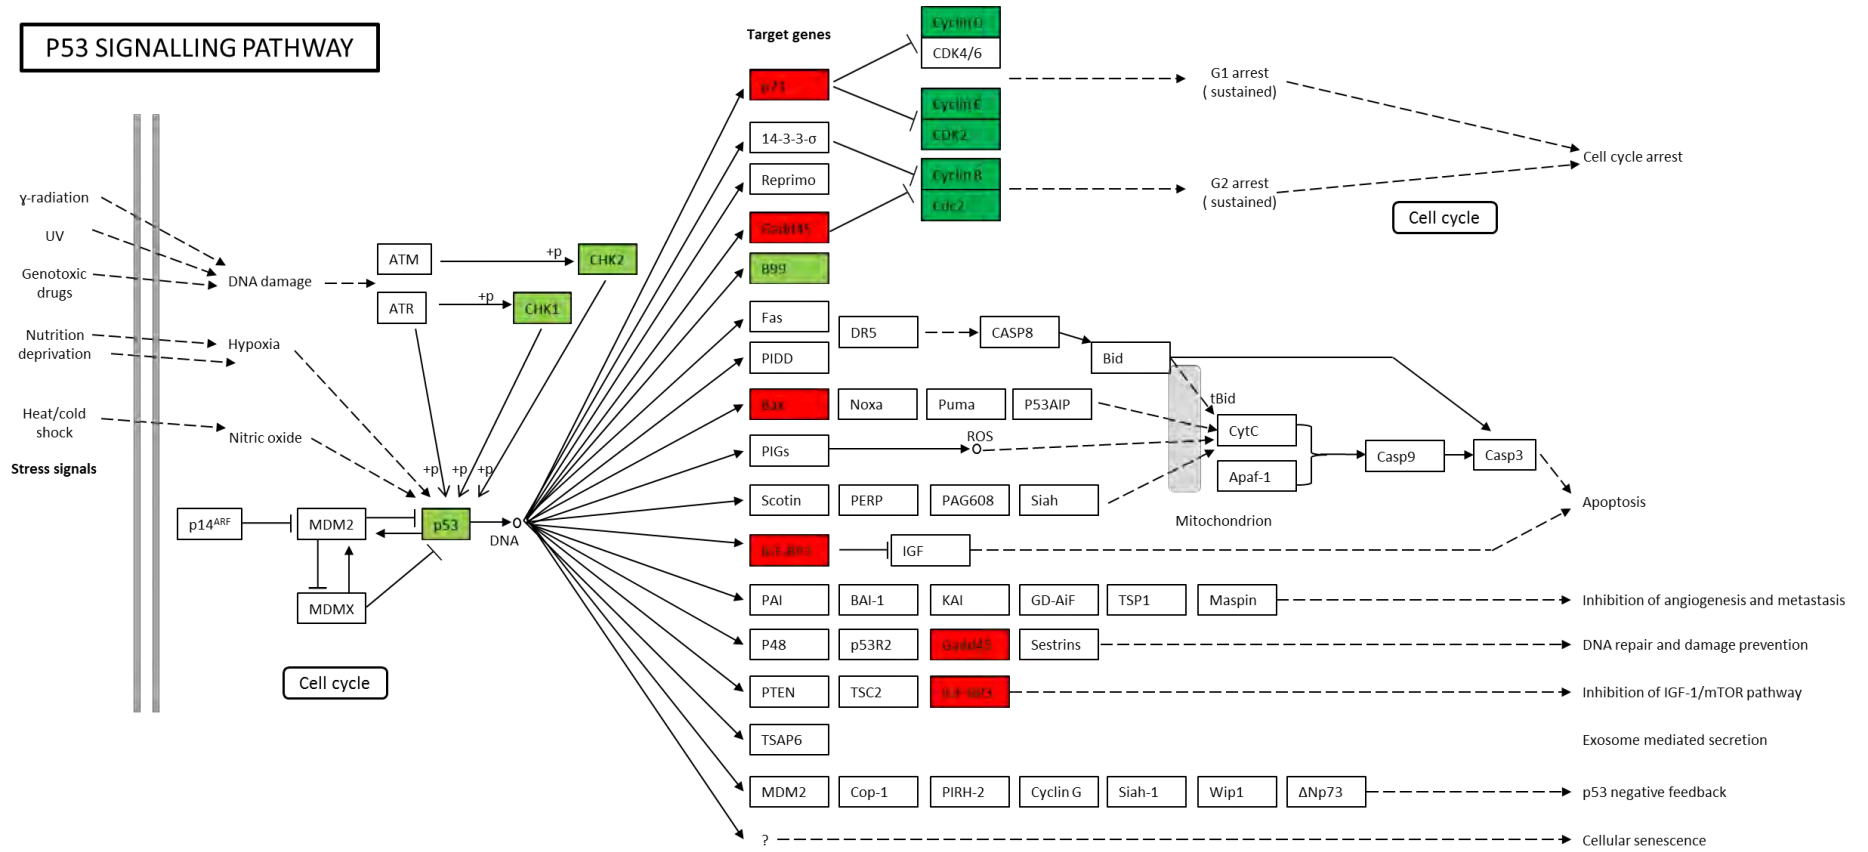

Figure S5

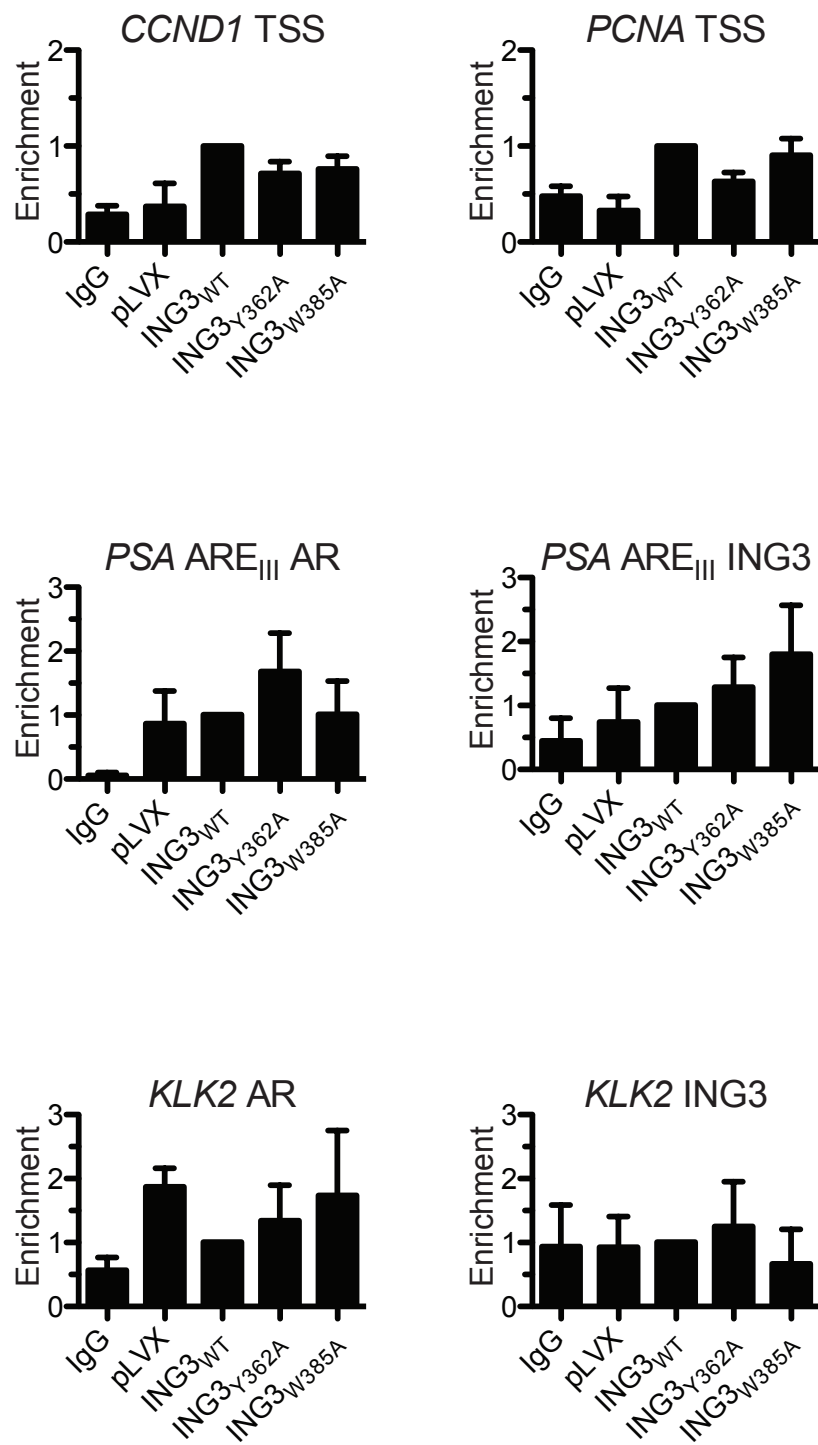

Figure S6

A)

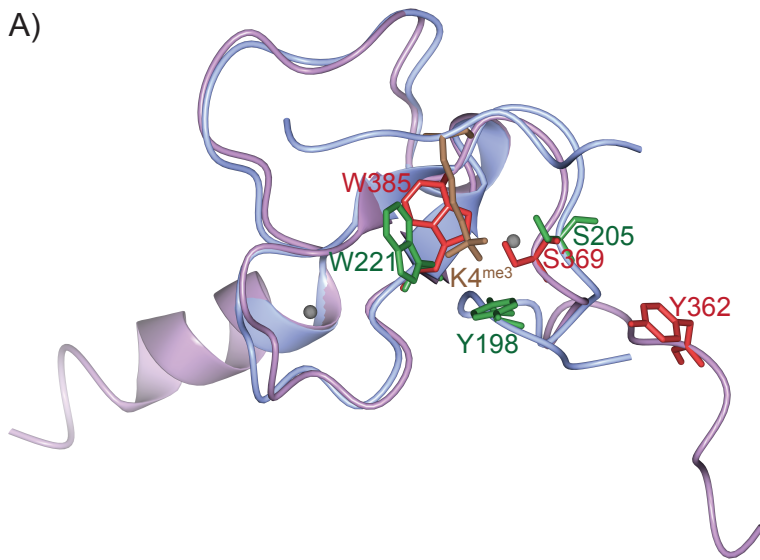

B)

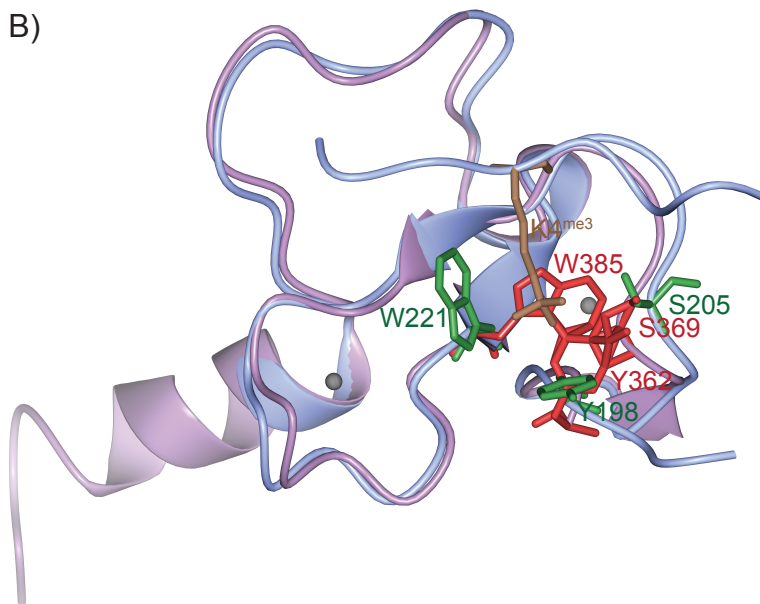

Figure S7

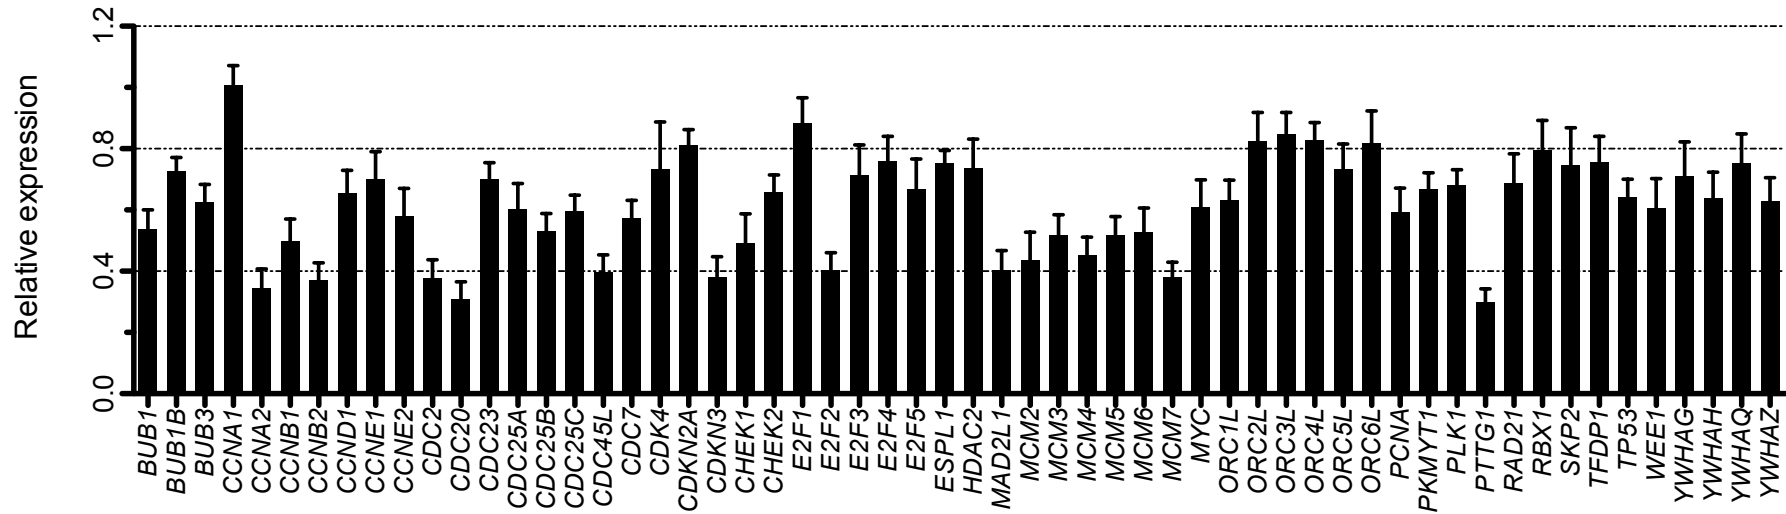



# Figure S8

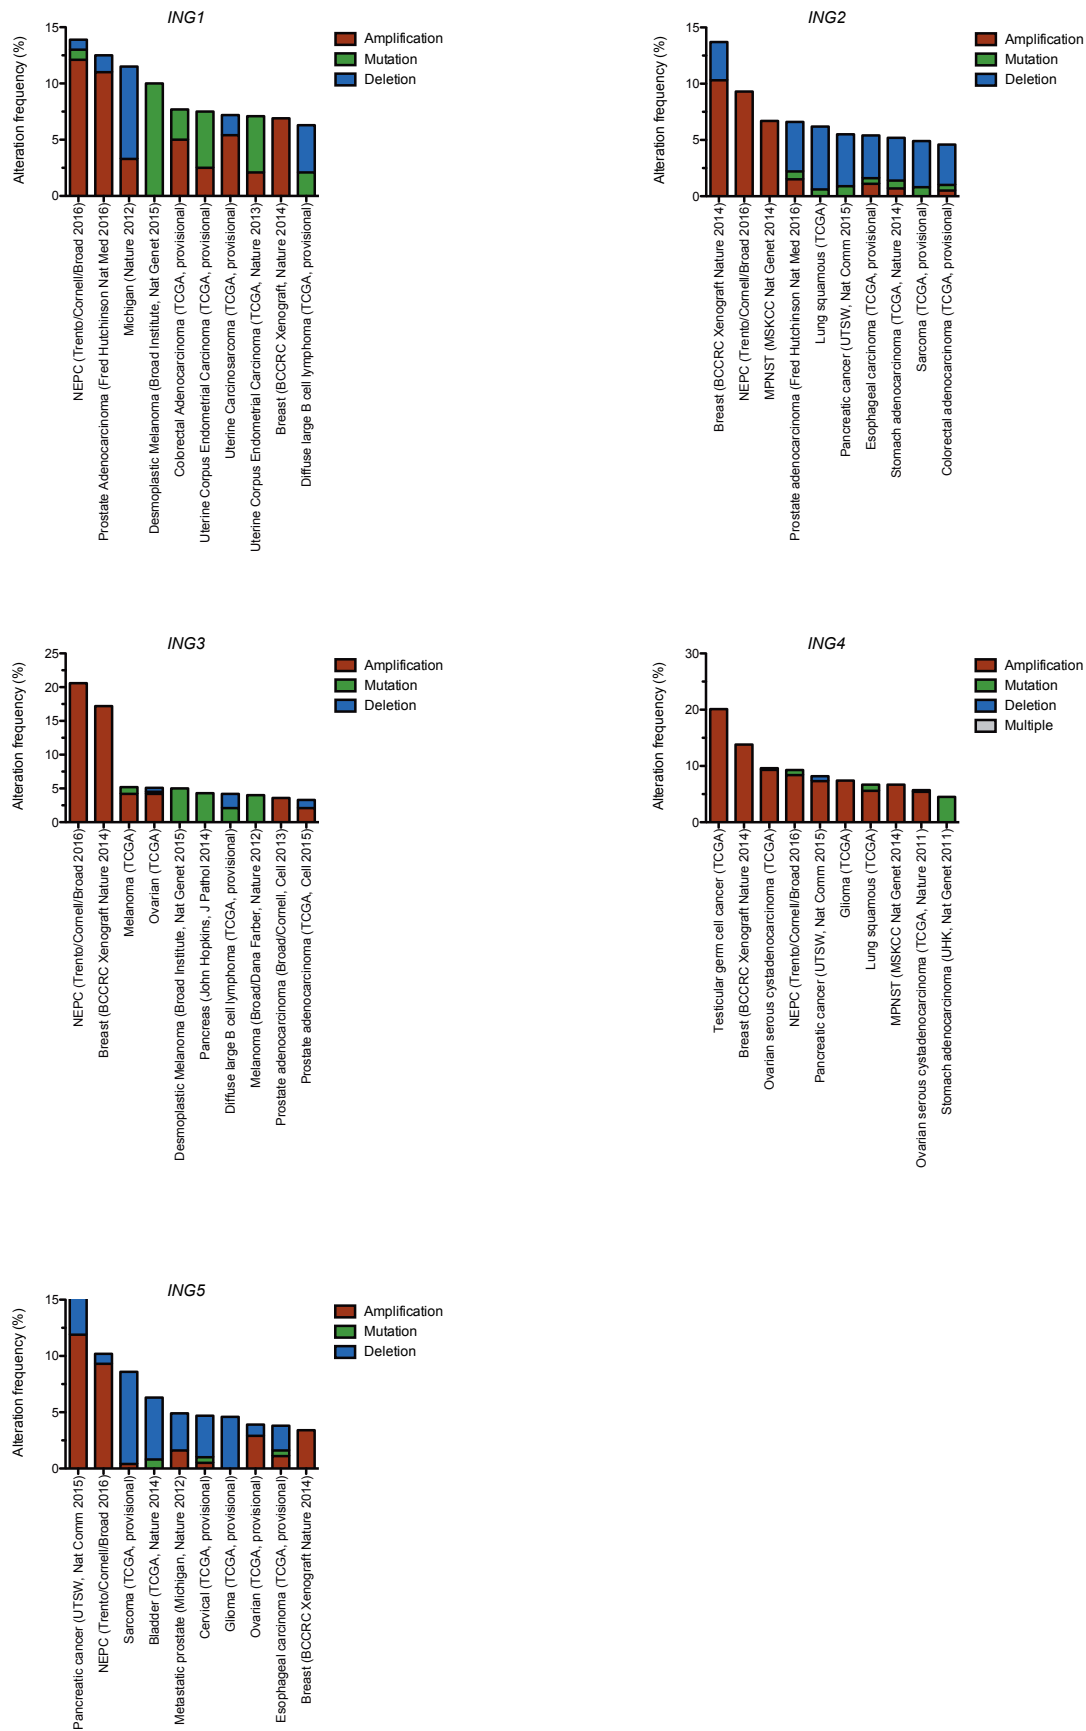

**Table S1:** Real-time qPCR primers for gene expression. The primers were selected from the NCBI Nucleotide database using the utility Primer-BLAST. The primers used for gene expression were designed to span exon-exon junctions and be separated by at least one intron when possible.

| <b>Gene</b>    | <b>Forward sequence 5'-3'</b> | <b>Reverse sequence 5'-3'</b> |
|----------------|-------------------------------|-------------------------------|
| <i>AR</i>      | GCAAAGCCTAAAGCCAGAT           | GAGTTCATGGGTGGCAAAG           |
| <i>BAX</i>     | GCCCTTTTGCTTCAGGGTTTCA        | TCAGCTTCTTGGTGGACGCA          |
| <i>CAMK2N1</i> | GCACGTCATCAATCCTATCATC        | ACACCAACAATTCTTCGGC           |
| <i>CCNA2</i>   | CACTCACTGGCTTTTCATCTTC        | CAGAAAACCATTGGTCCCTC          |
| <i>CCNB2</i>   | GATTTTGCAGAGCAAGGCAT          | TGGAAAAGTTGGCTCCAAAG          |
| <i>CDKN1A</i>  | CAGCTGCCGAAGTCAGTTCC          | GTTCTGACATGGCGCCTCT           |
| <i>FOXO3</i>   | AACGTGGGGAACCTTCACTGGT        | TTTGAGGGTCTGCTTTGCCCA         |
| <i>GREB1</i>   | GGATGAGGAGCTGGGGACAG          | GCTGAACCGGAAGCCTTGGA          |
| <i>HMMR</i>    | AAGCTGACAGCGGAGTTTTG          | TGGGTCATCAGAATTTGAAACA        |
| <i>HPRT1</i>   | GAACGTCTTGCTCGAGAGATGTG       | CCAGCAGGTCAGCAAAGAATTT        |
| <i>ING3</i>    | TGGAGGGGAAGAGCAAATGGCA        | TCTCAAGTGTGATCTACCAAGTCA      |
| <i>KIF20A</i>  | TAACAAGGGCCTAACCCTCA          | TGCTCTGTCGTCTCTACCTCC         |
| <i>KLK2</i>    | AGCATCGAACCAGAGGAGTTCT        | TGGAGGCTCACACACTGAAGA         |
| <i>MELK</i>    | GAGAGCCACTTGGGAACATC          | TGTGTGGATTTCTACCATTTGA        |
| <i>NKX3.1</i>  | AGCCAGAAAGGCACTTGGG           | GGCGCCTGAAGTGTTTTCA           |
| <i>NOXA</i>    | CTCTGTAGCTGAGTGGGCGG          | ACACTCGACTTCCAGCTCTGC         |
| <i>NUSAP1</i>  | TCATTTCTTTTCTTGCCTCA          | GCCAAGAGTCTGGGTCTCC           |
| <i>PIRC1</i>   | TACTATGGACTCCTCCGCCA          | CCGTGTGGAGTAGGTCTGGA          |
| <i>PML</i>     | GTCTTCCTGCCCAACAGCAAC         | AGCTCTCGGGAGGACGAGTT          |
| <i>PSA</i>     | ACTGCATCAGGAACAAAAGCGT        | TGTGGGAAGCTGTGGCTGAC          |
| <i>TMPRSS2</i> | CTGCTGGATTTCCGGGTG            | TTCTGAGGTCTTCCCTTTCTCCT       |
| <i>UBE2C</i>   | TTGTAAGGGTAGCCACTGGG          | TCAAATGGGTAGGGACCATC          |

**Table S2:** Real-time qPCR primers for ChIP analysis

| <b>Gene</b>              | <b>Forward sequence 5'-3'</b> | <b>Reverse sequence 5'-3'</b> |
|--------------------------|-------------------------------|-------------------------------|
| AURKA <sub>TSS</sub>     | AGAGATTCTGATTTACCGGGCTCT      | TCCGTA CTCTCAGACCGTAGACC      |
| CCNB1 <sub>TSS</sub>     | TCTTTCTGGAACTTCTCCTTGTG       | TCGAGTTCTGAAAGAAGCAAGACC      |
| CCND1 <sub>TSS</sub>     | GTCTCCAAATGGTCACCAAGAAAT      | CTGTCTTCTTTAAACCCACCACGA      |
| CCNE2 <sub>TSS</sub>     | GGTCACCTGATCGTAAGCAGAACT      | TTCCACAAACGTTACTCGACATA       |
| CDC2 <sub>TSS</sub>      | GGAATAATAAGCCGGGTACAGTGG      | TAGAGGACCCCGTTCCTCAATACT      |
| CDK2 <sub>TSS</sub>      | GAAGAAGGCATCTTTTTAGCACCA      | TGCAAATGAGCACCCCTTTTCTTAT     |
| CDKN1A <sub>-500bp</sub> | GGAGACTGCAGTGAGCTGAGAT        | CCCTGGCTTTTTGTTTTCATTT        |
| CDKN1A <sub>TSS</sub>    | CTGTGGCTCTGATTGGCTTTCT        | GACAAAATAGCCACCAGCCTCT        |
| CDKN2B <sub>TSS</sub>    | TGGCCGTAACTTAACGACACTCT       | ACGGGAGGGTAATGAAGCTGAG        |
| KLK2 <sub>ARE</sub>      | ACCCCTGTTGCTGTTTCATCCTG       | CCGCCCTTGCCCTGTTGG            |
| PCNA <sub>TSS</sub>      | AGGAGGAAAGTCTAGCTGGTTTTCG     | TGGTCGTTGTCTTTCTAGGTCTCA      |
| PSA <sub>AREIII</sub>    | TGGGACA ACTTGCAAACCTG         | CCAGAGTAGGTCTGTTTTCAATCCA     |
| TMPRSS2 <sub>TSS</sub>   | TGGTCCTGGATGATAAAAAAAGTTT     | GACATACGCCCCACAACAGA          |

**Table S3:** Microarray data from siING3 LNCaP.

| SYMBOL    | repeat 1 | repeat 2 | repeat 3 | repeat 4 | n=4 average | S.D.M. |
|-----------|----------|----------|----------|----------|-------------|--------|
| PTTG1     | 0.1788   | 0.3643   | 0.3575   | 0.3044   | 0.3012      | 0.0430 |
| CDC20     | 0.1359   | 0.3863   | 0.3803   | 0.3187   | 0.3053      | 0.0585 |
| UBE2C     | 0.1621   | 0.4084   | 0.3986   | 0.3329   | 0.3255      | 0.0570 |
| FAM83D    | 0.1542   | 0.3745   | 0.3844   | 0.4071   | 0.3300      | 0.0590 |
| GAL       | 0.1844   | 0.3757   | 0.4043   | 0.3653   | 0.3324      | 0.0500 |
| SNORD16   | 0.1892   | 0.3848   | 0.4103   | 0.3647   | 0.3372      | 0.0502 |
| NUSAP1    | 0.2043   | 0.3992   | 0.4035   | 0.3433   | 0.3376      | 0.0465 |
| SPC24     | 0.1891   | 0.4030   | 0.3784   | 0.3893   | 0.3400      | 0.0505 |
| CCNA2     | 0.1661   | 0.3966   | 0.4601   | 0.3533   | 0.3440      | 0.0632 |
| CEP55     | 0.1973   | 0.3994   | 0.3888   | 0.3932   | 0.3447      | 0.0492 |
| AURKA     | 0.1958   | 0.4288   | 0.4010   | 0.3692   | 0.3487      | 0.0524 |
| CDCA5     | 0.2289   | 0.4406   | 0.4057   | 0.3206   | 0.3489      | 0.0473 |
| MELK      | 0.2323   | 0.4513   | 0.3531   | 0.3663   | 0.3508      | 0.0451 |
| HMMR      | 0.2280   | 0.4003   | 0.4225   | 0.3587   | 0.3524      | 0.0435 |
| TK1       | 0.2131   | 0.4460   | 0.4145   | 0.3372   | 0.3527      | 0.0519 |
| TOP2A     | 0.1870   | 0.4605   | 0.3730   | 0.3928   | 0.3533      | 0.0585 |
| DLGAP5    | 0.2390   | 0.3972   | 0.3913   | 0.3996   | 0.3568      | 0.0393 |
| LOC731314 | 0.1842   | 0.4761   | 0.4060   | 0.3816   | 0.3620      | 0.0626 |
| PRC1      | 0.2231   | 0.4509   | 0.4075   | 0.4021   | 0.3709      | 0.0505 |
| CCNB2     | 0.2149   | 0.4545   | 0.4251   | 0.4032   | 0.3744      | 0.0542 |
| KIF20A    | 0.2305   | 0.4718   | 0.3680   | 0.4304   | 0.3752      | 0.0527 |
| OIP5      | 0.2344   | 0.4493   | 0.4255   | 0.3950   | 0.3761      | 0.0485 |
| LOC399942 | 0.2116   | 0.4766   | 0.4457   | 0.3728   | 0.3767      | 0.0592 |
| MCM7      | 0.2597   | 0.4699   | 0.4355   | 0.3560   | 0.3803      | 0.0467 |
| CDC2      | 0.2239   | 0.4737   | 0.4711   | 0.3538   | 0.3806      | 0.0593 |
| PTTG3P    | 0.1978   | 0.4419   | 0.4556   | 0.4359   | 0.3828      | 0.0618 |
| CDKN3     | 0.2112   | 0.5224   | 0.4293   | 0.3709   | 0.3834      | 0.0653 |
| NCAPG     | 0.2065   | 0.4762   | 0.4562   | 0.3962   | 0.3838      | 0.0615 |
| C16orf75  | 0.2102   | 0.4667   | 0.4131   | 0.4826   | 0.3932      | 0.0628 |
| CDC45L    | 0.2312   | 0.4717   | 0.4576   | 0.4321   | 0.3981      | 0.0562 |
| TMSB15A   | 0.2714   | 0.4406   | 0.4354   | 0.4473   | 0.3987      | 0.0425 |
| FAM64A    | 0.2733   | 0.4806   | 0.4312   | 0.4135   | 0.3996      | 0.0445 |
| CKS1B     | 0.2459   | 0.5311   | 0.4068   | 0.4200   | 0.4009      | 0.0587 |
| TYMS      | 0.2172   | 0.5749   | 0.4812   | 0.3338   | 0.4018      | 0.0790 |
| NMU       | 0.2512   | 0.4487   | 0.4810   | 0.4281   | 0.4023      | 0.0515 |
| MAD2L1    | 0.2169   | 0.4870   | 0.4715   | 0.4405   | 0.4039      | 0.0631 |
| AURKB     | 0.2213   | 0.5332   | 0.4099   | 0.4518   | 0.4040      | 0.0661 |
| PBK       | 0.2503   | 0.4480   | 0.4499   | 0.4688   | 0.4043      | 0.0515 |
| E2F2      | 0.2478   | 0.4739   | 0.4008   | 0.4999   | 0.4056      | 0.0566 |
| CENPM     | 0.2545   | 0.5062   | 0.4324   | 0.4447   | 0.4094      | 0.0541 |
| CDCA8     | 0.2835   | 0.4743   | 0.4793   | 0.4248   | 0.4155      | 0.0457 |
| KIFC1     | 0.2673   | 0.4892   | 0.4565   | 0.4778   | 0.4227      | 0.0522 |
| HES6      | 0.2690   | 0.5558   | 0.4785   | 0.3896   | 0.4232      | 0.0616 |

|           |        |        |        |        |        |        |
|-----------|--------|--------|--------|--------|--------|--------|
| HMGB2     | 0.2579 | 0.5502 | 0.4490 | 0.4374 | 0.4236 | 0.0608 |
| MMD       | 0.2728 | 0.5823 | 0.4069 | 0.4333 | 0.4238 | 0.0635 |
| APOBEC3B  | 0.2840 | 0.5371 | 0.4155 | 0.4644 | 0.4253 | 0.0533 |
| TPX2      | 0.3024 | 0.5247 | 0.4265 | 0.4516 | 0.4263 | 0.0463 |
| C11orf82  | 0.2495 | 0.5887 | 0.4895 | 0.3838 | 0.4279 | 0.0727 |
| CDCA3     | 0.3360 | 0.4502 | 0.4873 | 0.4401 | 0.4284 | 0.0324 |
| PRIM1     | 0.2761 | 0.5158 | 0.4590 | 0.4655 | 0.4291 | 0.0525 |
| CENPF     | 0.2987 | 0.5941 | 0.4112 | 0.4162 | 0.4300 | 0.0610 |
| CKS2      | 0.2437 | 0.4920 | 0.5922 | 0.3930 | 0.4302 | 0.0743 |
| RACGAP1   | 0.2866 | 0.5166 | 0.4649 | 0.4560 | 0.4310 | 0.0500 |
| FAM57A    | 0.3213 | 0.6587 | 0.3769 | 0.3712 | 0.4320 | 0.0766 |
| LMNB1     | 0.2643 | 0.6002 | 0.4373 | 0.4348 | 0.4342 | 0.0686 |
| WDR51A    | 0.3117 | 0.5682 | 0.4509 | 0.4136 | 0.4361 | 0.0529 |
| MCM2      | 0.2560 | 0.6886 | 0.3934 | 0.4104 | 0.4371 | 0.0907 |
| UGT2B15   | 0.2941 | 0.5351 | 0.4677 | 0.4518 | 0.4372 | 0.0510 |
| H2AFX     | 0.2461 | 0.5753 | 0.4654 | 0.4655 | 0.4381 | 0.0690 |
| CLDND2    | 0.3817 | 0.5382 | 0.4192 | 0.4178 | 0.4392 | 0.0341 |
| C18orf56  | 0.2959 | 0.5222 | 0.4790 | 0.4611 | 0.4396 | 0.0496 |
| ADIPOR1   | 0.3382 | 0.5502 | 0.4460 | 0.4293 | 0.4409 | 0.0434 |
| RAD51AP1  | 0.2889 | 0.5197 | 0.4739 | 0.4833 | 0.4414 | 0.0518 |
| CENPA     | 0.2943 | 0.5321 | 0.4633 | 0.4919 | 0.4454 | 0.0523 |
| LOC651816 | 0.2974 | 0.5243 | 0.5043 | 0.4637 | 0.4474 | 0.0516 |
| NETO2     | 0.3124 | 0.5105 | 0.4992 | 0.4701 | 0.4480 | 0.0460 |
| BIRC5     | 0.3022 | 0.5476 | 0.5055 | 0.4383 | 0.4484 | 0.0537 |
| PDSS1     | 0.3366 | 0.4991 | 0.5198 | 0.4404 | 0.4490 | 0.0411 |
| MCM4      | 0.2862 | 0.5664 | 0.4779 | 0.4661 | 0.4492 | 0.0587 |
| RRM2      | 0.2416 | 0.5798 | 0.4884 | 0.4892 | 0.4497 | 0.0726 |
| FEN1      | 0.2995 | 0.5458 | 0.4794 | 0.4754 | 0.4500 | 0.0527 |
| TRIP13    | 0.2497 | 0.6060 | 0.4399 | 0.5183 | 0.4535 | 0.0759 |
| SFXN1     | 0.2791 | 0.5629 | 0.4955 | 0.4803 | 0.4545 | 0.0612 |
| OAF       | 0.3242 | 0.5594 | 0.4588 | 0.4876 | 0.4575 | 0.0492 |
| LOC729779 | 0.3171 | 0.5937 | 0.4655 | 0.4537 | 0.4575 | 0.0565 |
| TTK       | 0.3005 | 0.4847 | 0.5557 | 0.5084 | 0.4623 | 0.0559 |
| CDT1      | 0.2999 | 0.6573 | 0.4774 | 0.4219 | 0.4641 | 0.0743 |
| SLC30A7   | 0.4327 | 0.5239 | 0.4479 | 0.4653 | 0.4674 | 0.0200 |
| FBXO5     | 0.3148 | 0.5467 | 0.5040 | 0.5081 | 0.4684 | 0.0521 |
| GIN52     | 0.2610 | 0.5977 | 0.5054 | 0.5415 | 0.4764 | 0.0743 |
| CKAP2L    | 0.3071 | 0.6246 | 0.4864 | 0.4878 | 0.4765 | 0.0651 |
| HJURP     | 0.3464 | 0.6252 | 0.4479 | 0.4901 | 0.4774 | 0.0578 |
| GGH       | 0.3854 | 0.4977 | 0.5961 | 0.4313 | 0.4776 | 0.0457 |
| BCL2L12   | 0.3507 | 0.5957 | 0.4617 | 0.5103 | 0.4796 | 0.0511 |
| ATAD2     | 0.4097 | 0.5505 | 0.4484 | 0.5100 | 0.4797 | 0.0314 |
| LOC731049 | 0.3521 | 0.4802 | 0.5714 | 0.5180 | 0.4804 | 0.0467 |
| UHRF1     | 0.3457 | 0.6192 | 0.4567 | 0.5001 | 0.4804 | 0.0565 |
| MTAP      | 0.3588 | 0.5800 | 0.4997 | 0.4954 | 0.4835 | 0.0459 |
| RBPMS2    | 0.3335 | 0.5896 | 0.5424 | 0.4753 | 0.4852 | 0.0557 |

|           |        |        |        |        |        |        |
|-----------|--------|--------|--------|--------|--------|--------|
| MTRF1     | 0.4183 | 0.4733 | 0.5710 | 0.4829 | 0.4864 | 0.0316 |
| PLK4      | 0.3073 | 0.6535 | 0.5199 | 0.4736 | 0.4886 | 0.0715 |
| PRR11     | 0.3331 | 0.6171 | 0.5148 | 0.4905 | 0.4889 | 0.0587 |
| RAB31     | 0.3900 | 0.6081 | 0.4430 | 0.5184 | 0.4899 | 0.0474 |
| CHEK1     | 0.2631 | 0.7175 | 0.5316 | 0.4625 | 0.4936 | 0.0938 |
| KIF4A     | 0.3863 | 0.5739 | 0.4686 | 0.5467 | 0.4939 | 0.0422 |
| ZWILCH    | 0.3456 | 0.6199 | 0.5512 | 0.4640 | 0.4952 | 0.0592 |
| KIAA0114  | 0.3341 | 0.6494 | 0.5493 | 0.4516 | 0.4961 | 0.0674 |
| MTP18     | 0.4112 | 0.5148 | 0.5474 | 0.5150 | 0.4971 | 0.0296 |
| CCNB1     | 0.3509 | 0.5738 | 0.6640 | 0.4171 | 0.5014 | 0.0715 |
| LOC440063 | 0.3781 | 0.5792 | 0.6164 | 0.4332 | 0.5017 | 0.0571 |
| ASPM      | 0.3565 | 0.6487 | 0.5075 | 0.5047 | 0.5043 | 0.0597 |
| SNHG1     | 0.3530 | 0.6720 | 0.4605 | 0.5353 | 0.5052 | 0.0670 |
| PSAT1     | 0.3625 | 0.5633 | 0.5453 | 0.5545 | 0.5064 | 0.0481 |
| KIF11     | 0.4253 | 0.6061 | 0.5332 | 0.4749 | 0.5099 | 0.0389 |
| MDC1      | 0.3760 | 0.5781 | 0.5322 | 0.5532 | 0.5099 | 0.0456 |
| KIF14     | 0.4288 | 0.5862 | 0.4749 | 0.5545 | 0.5111 | 0.0361 |
| RDH10     | 0.4304 | 0.5515 | 0.4774 | 0.5866 | 0.5115 | 0.0354 |
| SGOL1     | 0.3521 | 0.5883 | 0.5632 | 0.5484 | 0.5130 | 0.0543 |
| DDX39     | 0.3627 | 0.5944 | 0.5816 | 0.5170 | 0.5139 | 0.0532 |
| RFC4      | 0.2961 | 0.6916 | 0.5428 | 0.5294 | 0.5150 | 0.0817 |
| FAM96A    | 0.3948 | 0.6583 | 0.5671 | 0.4427 | 0.5157 | 0.0598 |
| LOC728160 | 0.3991 | 0.6154 | 0.5639 | 0.4852 | 0.5159 | 0.0472 |
| NCAPD2    | 0.3441 | 0.6432 | 0.5519 | 0.5268 | 0.5165 | 0.0627 |
| MCM3      | 0.3765 | 0.6869 | 0.5271 | 0.4763 | 0.5167 | 0.0648 |
| SLC38A1   | 0.3053 | 0.6635 | 0.5737 | 0.5244 | 0.5168 | 0.0761 |
| MPDU1     | 0.3933 | 0.6158 | 0.5630 | 0.4965 | 0.5172 | 0.0479 |
| C12orf32  | 0.4187 | 0.6792 | 0.4622 | 0.5104 | 0.5176 | 0.0570 |
| LOC729964 | 0.3491 | 0.5792 | 0.6490 | 0.4954 | 0.5182 | 0.0645 |
| XPOT      | 0.2793 | 0.6693 | 0.5675 | 0.5568 | 0.5182 | 0.0836 |
| LOC134997 | 0.4134 | 0.5835 | 0.6145 | 0.4636 | 0.5187 | 0.0479 |
| MCM5      | 0.4005 | 0.6763 | 0.4814 | 0.5172 | 0.5188 | 0.0579 |
| LOC728643 | 0.3187 | 0.6848 | 0.5527 | 0.5225 | 0.5197 | 0.0757 |
| POLE2     | 0.3892 | 0.6211 | 0.5802 | 0.4914 | 0.5205 | 0.0514 |
| KNTC1     | 0.4570 | 0.6800 | 0.5056 | 0.4408 | 0.5209 | 0.0548 |
| GPSM2     | 0.3707 | 0.6885 | 0.4785 | 0.5506 | 0.5221 | 0.0667 |
| GIN5      | 0.3817 | 0.6362 | 0.5493 | 0.5215 | 0.5222 | 0.0528 |
| ATF4      | 0.4973 | 0.5565 | 0.5545 | 0.4844 | 0.5232 | 0.0189 |
| CCDC86    | 0.4001 | 0.6482 | 0.5994 | 0.4490 | 0.5242 | 0.0592 |
| NT5DC2    | 0.3440 | 0.6523 | 0.5289 | 0.5723 | 0.5244 | 0.0653 |
| UBE2T     | 0.3760 | 0.7733 | 0.5417 | 0.4084 | 0.5249 | 0.0902 |
| MTHFD2    | 0.4124 | 0.6193 | 0.5377 | 0.5317 | 0.5253 | 0.0426 |
| SERP1     | 0.3922 | 0.5994 | 0.6263 | 0.4855 | 0.5258 | 0.0540 |
| SMC4      | 0.3392 | 0.6124 | 0.5232 | 0.6327 | 0.5269 | 0.0669 |
| NAP1L1    | 0.3539 | 0.5496 | 0.6642 | 0.5404 | 0.5270 | 0.0642 |
| DEPDC1B   | 0.3838 | 0.6733 | 0.5295 | 0.5224 | 0.5272 | 0.0591 |

|            |        |        |        |        |        |        |
|------------|--------|--------|--------|--------|--------|--------|
| MCM10      | 0.3773 | 0.5880 | 0.6526 | 0.4921 | 0.5275 | 0.0599 |
| MCM6       | 0.3508 | 0.7271 | 0.5413 | 0.4913 | 0.5276 | 0.0778 |
| LOC650157  | 0.4105 | 0.6068 | 0.6682 | 0.4284 | 0.5285 | 0.0643 |
| PFKP       | 0.4405 | 0.7169 | 0.4811 | 0.4767 | 0.5288 | 0.0633 |
| TMEM48     | 0.3852 | 0.7184 | 0.5391 | 0.4748 | 0.5294 | 0.0705 |
| CCDC58     | 0.3758 | 0.5415 | 0.5367 | 0.6658 | 0.5300 | 0.0594 |
| CDC25B     | 0.4150 | 0.6919 | 0.4860 | 0.5295 | 0.5306 | 0.0587 |
| POLQ       | 0.3833 | 0.6694 | 0.5187 | 0.5522 | 0.5309 | 0.0588 |
| MTHFD1L    | 0.4605 | 0.5930 | 0.4982 | 0.5753 | 0.5318 | 0.0314 |
| NUDT1      | 0.4234 | 0.6338 | 0.5197 | 0.5509 | 0.5320 | 0.0435 |
| SLC25A15   | 0.3398 | 0.6291 | 0.6011 | 0.5606 | 0.5327 | 0.0658 |
| RNASEH2A   | 0.3390 | 0.7165 | 0.5696 | 0.5057 | 0.5327 | 0.0782 |
| FIGNL1     | 0.3614 | 0.6543 | 0.5734 | 0.5424 | 0.5329 | 0.0618 |
| MLF1IP     | 0.3766 | 0.5634 | 0.5864 | 0.6054 | 0.5330 | 0.0528 |
| CENTA1     | 0.4568 | 0.6013 | 0.5352 | 0.5408 | 0.5335 | 0.0296 |
| ATF5       | 0.3892 | 0.6879 | 0.5497 | 0.5092 | 0.5340 | 0.0616 |
| U2AF2      | 0.4021 | 0.7090 | 0.5261 | 0.5011 | 0.5346 | 0.0640 |
| GLT25D1    | 0.3951 | 0.6361 | 0.5348 | 0.5876 | 0.5384 | 0.0521 |
| BUB1       | 0.3928 | 0.4831 | 0.6664 | 0.6143 | 0.5391 | 0.0622 |
| IMPDH1     | 0.4255 | 0.6419 | 0.5754 | 0.5184 | 0.5403 | 0.0458 |
| MGC40489   | 0.3553 | 0.7141 | 0.6076 | 0.4858 | 0.5407 | 0.0774 |
| KPNA2      | 0.3154 | 0.6750 | 0.6260 | 0.5485 | 0.5412 | 0.0796 |
| SNORD96A   | 0.4103 | 0.6339 | 0.5320 | 0.5892 | 0.5413 | 0.0484 |
| WARS       | 0.4096 | 0.7114 | 0.5353 | 0.5103 | 0.5417 | 0.0628 |
| HNRPA2B1   | 0.4070 | 0.6408 | 0.6275 | 0.4946 | 0.5425 | 0.0559 |
| CHAF1B     | 0.3784 | 0.7668 | 0.5095 | 0.5160 | 0.5427 | 0.0812 |
| ADM2       | 0.5247 | 0.5758 | 0.5310 | 0.5448 | 0.5441 | 0.0114 |
| SLC1A5     | 0.5785 | 0.5435 | 0.6264 | 0.4295 | 0.5445 | 0.0419 |
| POLE3      | 0.3478 | 0.7399 | 0.6001 | 0.4918 | 0.5449 | 0.0830 |
| ZAK        | 0.3993 | 0.6271 | 0.5928 | 0.5625 | 0.5454 | 0.0505 |
| CDCA2      | 0.3709 | 0.6571 | 0.5416 | 0.6129 | 0.5456 | 0.0629 |
| TRAPPC3    | 0.4450 | 0.6752 | 0.5214 | 0.5412 | 0.5457 | 0.0479 |
| LOC644774  | 0.3370 | 0.8430 | 0.5137 | 0.4901 | 0.5460 | 0.1065 |
| RRP1B      | 0.4347 | 0.5859 | 0.5201 | 0.6439 | 0.5462 | 0.0449 |
| F12        | 0.3660 | 0.7693 | 0.4952 | 0.5544 | 0.5462 | 0.0841 |
| WDR43      | 0.3554 | 0.7379 | 0.6182 | 0.4754 | 0.5467 | 0.0834 |
| TXNDC5     | 0.4152 | 0.7118 | 0.5277 | 0.5391 | 0.5484 | 0.0612 |
| LOC652595  | 0.3635 | 0.7768 | 0.5020 | 0.5527 | 0.5487 | 0.0859 |
| CTSL2      | 0.4133 | 0.7613 | 0.5458 | 0.4767 | 0.5493 | 0.0757 |
| SNHG3-RCC1 | 0.3526 | 0.7287 | 0.5501 | 0.5667 | 0.5495 | 0.0770 |
| PLOD3      | 0.4789 | 0.5745 | 0.6426 | 0.5039 | 0.5500 | 0.0369 |
| SUV39H1    | 0.3814 | 0.6490 | 0.6406 | 0.5292 | 0.5501 | 0.0625 |
| CENPE      | 0.4136 | 0.6486 | 0.5613 | 0.5783 | 0.5505 | 0.0494 |
| CHDH       | 0.4667 | 0.6307 | 0.5563 | 0.5506 | 0.5511 | 0.0335 |
| RFC5       | 0.4460 | 0.6172 | 0.6140 | 0.5307 | 0.5520 | 0.0406 |
| SLC44A1    | 0.4149 | 0.7385 | 0.5481 | 0.5079 | 0.5524 | 0.0680 |

|            |        |        |        |        |        |        |
|------------|--------|--------|--------|--------|--------|--------|
| CDCA7      | 0.3753 | 0.7220 | 0.5295 | 0.5826 | 0.5524 | 0.0716 |
| MNS1       | 0.4224 | 0.6583 | 0.6216 | 0.5071 | 0.5524 | 0.0540 |
| RRM1       | 0.3799 | 0.6479 | 0.6397 | 0.5431 | 0.5527 | 0.0623 |
| ASF1B      | 0.3376 | 0.7221 | 0.5662 | 0.5855 | 0.5529 | 0.0797 |
| NP         | 0.3750 | 0.7855 | 0.6273 | 0.4271 | 0.5537 | 0.0945 |
| EARS2      | 0.5142 | 0.6358 | 0.5930 | 0.4773 | 0.5551 | 0.0361 |
| KIF2C      | 0.4189 | 0.6873 | 0.5302 | 0.5851 | 0.5554 | 0.0559 |
| SERBP1     | 0.5138 | 0.6730 | 0.6067 | 0.4335 | 0.5568 | 0.0525 |
| POLA2      | 0.4443 | 0.7049 | 0.5128 | 0.5671 | 0.5573 | 0.0552 |
| TIMELESS   | 0.3465 | 0.8643 | 0.5412 | 0.4832 | 0.5588 | 0.1097 |
| CDCA4      | 0.4293 | 0.6519 | 0.5581 | 0.6000 | 0.5598 | 0.0475 |
| HNRNPH1    | 0.4311 | 0.7132 | 0.5975 | 0.4998 | 0.5604 | 0.0613 |
| USP3       | 0.5477 | 0.6945 | 0.5137 | 0.4867 | 0.5606 | 0.0463 |
| RAD54L     | 0.4731 | 0.6455 | 0.5437 | 0.5832 | 0.5614 | 0.0361 |
| ASNS       | 0.4867 | 0.7339 | 0.5402 | 0.4850 | 0.5614 | 0.0589 |
| HEATR2     | 0.4947 | 0.6731 | 0.5608 | 0.5198 | 0.5621 | 0.0394 |
| C19orf51   | 0.4547 | 0.6463 | 0.5204 | 0.6271 | 0.5621 | 0.0453 |
| LG12       | 0.4040 | 0.6841 | 0.5435 | 0.6178 | 0.5624 | 0.0601 |
| CENPK      | 0.3523 | 0.7505 | 0.6199 | 0.5274 | 0.5625 | 0.0837 |
| KIAA0391   | 0.4647 | 0.6511 | 0.5970 | 0.5475 | 0.5651 | 0.0396 |
| FOXM1      | 0.4340 | 0.6622 | 0.5467 | 0.6210 | 0.5660 | 0.0501 |
| LOC402644  | 0.3326 | 0.6760 | 0.7100 | 0.5461 | 0.5662 | 0.0855 |
| TMEM194A   | 0.4009 | 0.7021 | 0.6010 | 0.5634 | 0.5669 | 0.0626 |
| OVGP1      | 0.4206 | 0.7172 | 0.6267 | 0.5045 | 0.5672 | 0.0655 |
| ZNF621     | 0.4735 | 0.6693 | 0.5902 | 0.5386 | 0.5679 | 0.0414 |
| C7orf44    | 0.3848 | 0.7265 | 0.6014 | 0.5596 | 0.5681 | 0.0706 |
| LOC653874  | 0.3709 | 0.6401 | 0.7355 | 0.5272 | 0.5684 | 0.0784 |
| TRIM47     | 0.4799 | 0.6224 | 0.5566 | 0.6169 | 0.5689 | 0.0332 |
| DKFZp686O2 | 0.3835 | 0.7522 | 0.5286 | 0.6119 | 0.5691 | 0.0772 |
| VGF        | 0.4562 | 0.7061 | 0.4919 | 0.6286 | 0.5707 | 0.0585 |
| ECT2       | 0.4546 | 0.6644 | 0.6695 | 0.4953 | 0.5710 | 0.0561 |
| DIS3L      | 0.4007 | 0.7155 | 0.6062 | 0.5631 | 0.5714 | 0.0653 |
| EXOSC9     | 0.3999 | 0.6956 | 0.6640 | 0.5283 | 0.5719 | 0.0679 |
| MGC39900   | 0.4573 | 0.6865 | 0.5776 | 0.5678 | 0.5723 | 0.0468 |
| HIST1H2BK  | 0.4623 | 0.7648 | 0.5685 | 0.4949 | 0.5727 | 0.0678 |
| CDC7       | 0.4713 | 0.6289 | 0.7110 | 0.4799 | 0.5728 | 0.0586 |
| MOCOS      | 0.4204 | 0.6880 | 0.6057 | 0.5822 | 0.5741 | 0.0560 |
| SLC16A10   | 0.3624 | 0.6950 | 0.6487 | 0.5914 | 0.5744 | 0.0737 |
| ANLN       | 0.3240 | 0.7131 | 0.6456 | 0.6154 | 0.5745 | 0.0860 |
| C15orf23   | 0.4399 | 0.7349 | 0.6003 | 0.5236 | 0.5747 | 0.0627 |
| GALK1      | 0.4409 | 0.7242 | 0.6326 | 0.5023 | 0.5750 | 0.0638 |
| CCDC34     | 0.4174 | 0.7037 | 0.6317 | 0.5478 | 0.5752 | 0.0615 |
| ATP5C1     | 0.4365 | 0.5574 | 0.7964 | 0.5123 | 0.5756 | 0.0777 |
| LOC92659   | 0.3766 | 0.6496 | 0.6839 | 0.5952 | 0.5763 | 0.0690 |
| SLC29A2    | 0.4057 | 0.7177 | 0.6631 | 0.5198 | 0.5766 | 0.0706 |
| SLC25A19   | 0.3780 | 0.7307 | 0.6888 | 0.5108 | 0.5771 | 0.0817 |



|            |        |        |        |        |        |        |
|------------|--------|--------|--------|--------|--------|--------|
| TROAP      | 0.4462 | 0.6526 | 0.6153 | 0.5950 | 0.5773 | 0.0453 |
| LOC1001343 | 0.4063 | 0.8331 | 0.5615 | 0.5091 | 0.5775 | 0.0911 |
| FANCG      | 0.3631 | 0.7845 | 0.6220 | 0.5411 | 0.5777 | 0.0876 |
| BZW2       | 0.3915 | 0.6759 | 0.6790 | 0.5691 | 0.5789 | 0.0675 |
| LOC645436  | 0.3125 | 0.8380 | 0.6131 | 0.5523 | 0.5790 | 0.1080 |
| MT1F       | 0.5375 | 0.6134 | 0.5814 | 0.5843 | 0.5791 | 0.0156 |
| PRMT3      | 0.3839 | 0.6893 | 0.7212 | 0.5243 | 0.5797 | 0.0782 |
| LYAR       | 0.3948 | 0.7439 | 0.6912 | 0.4905 | 0.5801 | 0.0824 |
| NPTX2      | 0.4116 | 0.6490 | 0.6024 | 0.6576 | 0.5802 | 0.0575 |
| TTF2       | 0.4015 | 0.7409 | 0.6154 | 0.5633 | 0.5803 | 0.0703 |
| RPRML      | 0.3798 | 0.7375 | 0.6180 | 0.5868 | 0.5805 | 0.0744 |
| CCNE2      | 0.3537 | 0.7942 | 0.5757 | 0.5986 | 0.5805 | 0.0901 |
| RAB11FIP2  | 0.4580 | 0.7544 | 0.5542 | 0.5597 | 0.5816 | 0.0622 |
| LOC652903  | 0.3879 | 0.7585 | 0.6044 | 0.5827 | 0.5834 | 0.0760 |
| RFC3       | 0.4295 | 0.6841 | 0.6263 | 0.5982 | 0.5845 | 0.0547 |
| NR2C2AP    | 0.5581 | 0.7472 | 0.6056 | 0.4276 | 0.5847 | 0.0660 |
| MCOLN2     | 0.4009 | 0.7467 | 0.6563 | 0.5352 | 0.5848 | 0.0751 |
| LOC1001305 | 0.4256 | 0.7876 | 0.5763 | 0.5503 | 0.5849 | 0.0751 |
| C9orf140   | 0.5019 | 0.7057 | 0.5713 | 0.5629 | 0.5854 | 0.0430 |
| TRNP1      | 0.3809 | 0.6361 | 0.6031 | 0.7236 | 0.5859 | 0.0729 |
| LOC392285  | 0.4763 | 0.6635 | 0.7047 | 0.4994 | 0.5860 | 0.0575 |
| LOC650215  | 0.4816 | 0.7680 | 0.5591 | 0.5353 | 0.5860 | 0.0628 |
| LOC727761  | 0.3795 | 0.8183 | 0.5887 | 0.5577 | 0.5860 | 0.0901 |
| ADSS       | 0.4778 | 0.7221 | 0.5894 | 0.5551 | 0.5861 | 0.0510 |
| C6orf173   | 0.4930 | 0.5922 | 0.6656 | 0.5937 | 0.5861 | 0.0355 |
| EXO1       | 0.4512 | 0.6344 | 0.6619 | 0.5990 | 0.5866 | 0.0469 |
| KIF20B     | 0.4385 | 0.7196 | 0.6127 | 0.5763 | 0.5868 | 0.0580 |
| SRPK1      | 0.5134 | 0.8415 | 0.5223 | 0.4706 | 0.5870 | 0.0856 |
| SAC3D1     | 0.4521 | 0.6698 | 0.6502 | 0.5779 | 0.5875 | 0.0493 |
| STIL       | 0.4783 | 0.6317 | 0.6978 | 0.5423 | 0.5875 | 0.0484 |
| TAGLN2     | 0.4302 | 0.7743 | 0.5694 | 0.5771 | 0.5877 | 0.0708 |
| TMEM20     | 0.4004 | 0.6847 | 0.6596 | 0.6088 | 0.5884 | 0.0646 |
| SEPHS1     | 0.4343 | 0.6724 | 0.6939 | 0.5587 | 0.5898 | 0.0597 |
| C17orf58   | 0.5047 | 0.7221 | 0.5962 | 0.5372 | 0.5901 | 0.0479 |
| AIF1L      | 0.4509 | 0.7850 | 0.5978 | 0.5280 | 0.5904 | 0.0715 |
| LOC1001291 | 0.4372 | 0.7748 | 0.5789 | 0.5709 | 0.5904 | 0.0695 |
| CDC42SE1   | 0.4699 | 0.6840 | 0.6203 | 0.5876 | 0.5905 | 0.0449 |
| NME1-NME2  | 0.4329 | 0.7705 | 0.6949 | 0.4649 | 0.5908 | 0.0836 |
| GIN54      | 0.4476 | 0.6218 | 0.6350 | 0.6606 | 0.5912 | 0.0486 |
| CDK2       | 0.4219 | 0.8328 | 0.5879 | 0.5260 | 0.5922 | 0.0872 |
| CKLF       | 0.4278 | 0.7633 | 0.6773 | 0.5008 | 0.5923 | 0.0774 |
| NDC80      | 0.4292 | 0.6029 | 0.7309 | 0.6073 | 0.5926 | 0.0620 |
| MT1A       | 0.4581 | 0.7729 | 0.6717 | 0.4696 | 0.5931 | 0.0774 |
| FANCI      | 0.4313 | 0.6742 | 0.6858 | 0.5812 | 0.5931 | 0.0588 |
| C9orf58    | 0.4899 | 0.7082 | 0.5902 | 0.5847 | 0.5933 | 0.0447 |
| AK3L1      | 0.4573 | 0.7531 | 0.5996 | 0.5650 | 0.5938 | 0.0611 |

|            |        |        |        |        |        |        |
|------------|--------|--------|--------|--------|--------|--------|
| IL17RB     | 0.4646 | 0.6923 | 0.6556 | 0.5653 | 0.5945 | 0.0509 |
| NCAPG2     | 0.4938 | 0.6655 | 0.6138 | 0.6055 | 0.5946 | 0.0361 |
| LOC653505  | 0.4565 | 0.7426 | 0.6294 | 0.5500 | 0.5946 | 0.0607 |
| PCNA       | 0.4121 | 0.6230 | 0.7757 | 0.5685 | 0.5948 | 0.0751 |
| ISOC2      | 0.4771 | 0.7179 | 0.6517 | 0.5336 | 0.5951 | 0.0548 |
| PPIL5      | 0.3750 | 0.7610 | 0.6497 | 0.5959 | 0.5954 | 0.0811 |
| PPPDE1     | 0.6091 | 0.7221 | 0.5601 | 0.4924 | 0.5959 | 0.0484 |
| LOC645385  | 0.4084 | 0.7503 | 0.6613 | 0.5660 | 0.5965 | 0.0731 |
| C12orf48   | 0.4902 | 0.6721 | 0.6632 | 0.5618 | 0.5968 | 0.0435 |
| RBMX       | 0.4578 | 0.6944 | 0.7136 | 0.5231 | 0.5972 | 0.0632 |
| CCDC99     | 0.4219 | 0.8674 | 0.6249 | 0.4753 | 0.5973 | 0.0997 |
| MND1       | 0.4739 | 0.6307 | 0.7003 | 0.5864 | 0.5978 | 0.0475 |
| LOC1001316 | 0.4139 | 0.8358 | 0.5758 | 0.5661 | 0.5979 | 0.0875 |
| BRI3BP     | 0.3977 | 0.7399 | 0.6838 | 0.5705 | 0.5980 | 0.0755 |
| POLR2F     | 0.4903 | 0.7484 | 0.5936 | 0.5597 | 0.5980 | 0.0545 |
| CDC25C     | 0.4866 | 0.7335 | 0.6121 | 0.5618 | 0.5985 | 0.0519 |
| CXCR7      | 0.4690 | 0.8090 | 0.5829 | 0.5393 | 0.6001 | 0.0735 |
| LIN9       | 0.5255 | 0.5910 | 0.7228 | 0.5617 | 0.6003 | 0.0430 |
| NT5C3      | 0.4116 | 0.7298 | 0.6857 | 0.5762 | 0.6008 | 0.0709 |
| SPATA5L1   | 0.5260 | 0.6497 | 0.7150 | 0.5146 | 0.6013 | 0.0487 |
| SLBP       | 0.3899 | 0.7951 | 0.6238 | 0.5977 | 0.6016 | 0.0830 |
| MT1X       | 0.4285 | 0.7115 | 0.6796 | 0.5872 | 0.6017 | 0.0635 |
| LOC81691   | 0.4480 | 0.7901 | 0.5610 | 0.6082 | 0.6018 | 0.0712 |
| LOC727803  | 0.4514 | 0.7584 | 0.7203 | 0.4787 | 0.6022 | 0.0798 |
| RCC1       | 0.4317 | 0.7291 | 0.6136 | 0.6350 | 0.6023 | 0.0622 |
| UCHL5      | 0.3936 | 0.7695 | 0.6787 | 0.5681 | 0.6025 | 0.0809 |
| CTXN1      | 0.4897 | 0.6456 | 0.6281 | 0.6476 | 0.6027 | 0.0379 |
| NUP85      | 0.4758 | 0.7894 | 0.5945 | 0.5515 | 0.6028 | 0.0669 |
| CDC25A     | 0.4082 | 0.8234 | 0.6004 | 0.5795 | 0.6029 | 0.0852 |
| LOC402112  | 0.3081 | 0.9262 | 0.6725 | 0.5063 | 0.6033 | 0.1309 |
| DHX33      | 0.4041 | 0.8286 | 0.6866 | 0.4955 | 0.6037 | 0.0953 |
| GTSE1      | 0.5293 | 0.6870 | 0.6509 | 0.5492 | 0.6041 | 0.0384 |
| EIF3CL     | 0.4173 | 0.8288 | 0.5635 | 0.6073 | 0.6042 | 0.0852 |
| UTP11L     | 0.4378 | 0.8244 | 0.6297 | 0.5258 | 0.6044 | 0.0832 |
| C1orf112   | 0.4644 | 0.7008 | 0.6190 | 0.6349 | 0.6048 | 0.0500 |
| CBFB       | 0.4555 | 0.7994 | 0.6223 | 0.5426 | 0.6049 | 0.0732 |
| GMFB       | 0.4920 | 0.6641 | 0.7285 | 0.5357 | 0.6051 | 0.0550 |
| DHX15      | 0.4568 | 0.7781 | 0.7083 | 0.4774 | 0.6051 | 0.0811 |
| C4orf46    | 0.5235 | 0.6228 | 0.6884 | 0.5861 | 0.6052 | 0.0345 |
| LOC729816  | 0.4586 | 0.7347 | 0.7183 | 0.5097 | 0.6053 | 0.0708 |
| XRCC3      | 0.4892 | 0.7767 | 0.5570 | 0.6005 | 0.6058 | 0.0614 |
| FBL        | 0.3913 | 0.8243 | 0.6354 | 0.5745 | 0.6064 | 0.0893 |
| WDR34      | 0.4779 | 0.7525 | 0.6627 | 0.5326 | 0.6064 | 0.0622 |
| KCTD20     | 0.4654 | 0.7067 | 0.6054 | 0.6483 | 0.6065 | 0.0514 |
| SNHG4      | 0.4033 | 0.7662 | 0.5499 | 0.7078 | 0.6068 | 0.0818 |
| ST6GALNAC4 | 0.4600 | 0.7307 | 0.6284 | 0.6103 | 0.6073 | 0.0558 |

|            |        |        |        |        |        |        |
|------------|--------|--------|--------|--------|--------|--------|
| LOC643300  | 0.4467 | 0.7523 | 0.7909 | 0.4402 | 0.6076 | 0.0951 |
| ZWINT      | 0.4496 | 0.7647 | 0.6601 | 0.5573 | 0.6079 | 0.0677 |
| SLC20A1    | 0.4144 | 0.8301 | 0.6531 | 0.5345 | 0.6080 | 0.0886 |
| RPL22      | 0.4974 | 0.8027 | 0.5796 | 0.5531 | 0.6082 | 0.0671 |
| STC2       | 0.6133 | 0.7876 | 0.5031 | 0.5294 | 0.6084 | 0.0642 |
| WEE1       | 0.3979 | 0.8628 | 0.6046 | 0.5708 | 0.6090 | 0.0959 |
| EFHD2      | 0.4682 | 0.7102 | 0.6218 | 0.6379 | 0.6095 | 0.0509 |
| PGK1       | 0.4237 | 0.9386 | 0.6019 | 0.4762 | 0.6101 | 0.1157 |
| SIGMAR1    | 0.4531 | 0.7767 | 0.6603 | 0.5518 | 0.6105 | 0.0697 |
| LOC1001333 | 0.3519 | 0.8802 | 0.7147 | 0.4954 | 0.6105 | 0.1168 |
| MYC        | 0.4216 | 0.8202 | 0.6778 | 0.5228 | 0.6106 | 0.0875 |
| LOC1001296 | 0.5382 | 0.7742 | 0.5987 | 0.5316 | 0.6107 | 0.0566 |
| SKA1       | 0.5371 | 0.6664 | 0.5432 | 0.6990 | 0.6114 | 0.0417 |
| DPAGT1     | 0.4982 | 0.7984 | 0.6172 | 0.5320 | 0.6115 | 0.0672 |
| LOC1001325 | 0.3930 | 0.8867 | 0.6562 | 0.5127 | 0.6121 | 0.1061 |
| PSMG1      | 0.3860 | 0.7691 | 0.7474 | 0.5464 | 0.6122 | 0.0906 |
| EIF4EBP1   | 0.6543 | 0.6802 | 0.5235 | 0.5941 | 0.6130 | 0.0349 |
| PMM2       | 0.4151 | 0.7660 | 0.7124 | 0.5588 | 0.6131 | 0.0793 |
| HDGF       | 0.5023 | 0.7505 | 0.6702 | 0.5304 | 0.6134 | 0.0586 |
| CNKSR3     | 0.5273 | 0.9059 | 0.5568 | 0.4643 | 0.6136 | 0.0993 |
| MMACHC     | 0.4330 | 0.7791 | 0.6896 | 0.5538 | 0.6139 | 0.0760 |
| LOC643997  | 0.4659 | 0.7745 | 0.6871 | 0.5283 | 0.6140 | 0.0709 |
| PHGDH      | 0.5011 | 0.7126 | 0.6571 | 0.5864 | 0.6143 | 0.0457 |
| RANBP1     | 0.4068 | 0.8080 | 0.7287 | 0.5143 | 0.6145 | 0.0929 |
| GMNN       | 0.5547 | 0.6227 | 0.7950 | 0.4872 | 0.6149 | 0.0661 |
| LOC128192  | 0.3753 | 0.6963 | 0.8521 | 0.5368 | 0.6151 | 0.1026 |
| C1orf174   | 0.4475 | 0.7821 | 0.6593 | 0.5727 | 0.6154 | 0.0705 |
| C20orf27   | 0.4543 | 0.7693 | 0.6645 | 0.5750 | 0.6158 | 0.0669 |
| MRPS2      | 0.5296 | 0.7406 | 0.6603 | 0.5328 | 0.6158 | 0.0515 |
| LEPROTL1   | 0.4793 | 0.7026 | 0.7435 | 0.5382 | 0.6159 | 0.0636 |
| TUBG1      | 0.5580 | 0.7616 | 0.5918 | 0.5530 | 0.6161 | 0.0493 |
| L2HGDH     | 0.4929 | 0.7998 | 0.5550 | 0.6188 | 0.6166 | 0.0662 |
| PTGFR      | 0.4447 | 0.7229 | 0.6196 | 0.6817 | 0.6172 | 0.0613 |
| C11orf75   | 0.5742 | 0.8181 | 0.4949 | 0.5824 | 0.6174 | 0.0697 |
| IMPAD1     | 0.4657 | 0.7064 | 0.7771 | 0.5205 | 0.6174 | 0.0741 |
| DSC2       | 0.4614 | 0.8309 | 0.6405 | 0.5390 | 0.6180 | 0.0799 |
| EZH2       | 0.4649 | 0.7917 | 0.6206 | 0.5963 | 0.6183 | 0.0671 |
| CNOT6      | 0.5095 | 0.7111 | 0.6677 | 0.5864 | 0.6187 | 0.0446 |
| CHMP5      | 0.4216 | 0.7480 | 0.7573 | 0.5481 | 0.6188 | 0.0815 |
| HOOK1      | 0.4360 | 0.7235 | 0.6821 | 0.6337 | 0.6188 | 0.0636 |
| STMN1      | 0.4856 | 0.7895 | 0.6279 | 0.5724 | 0.6188 | 0.0640 |
| SPRYD4     | 0.4647 | 0.7480 | 0.6617 | 0.6015 | 0.6190 | 0.0596 |
| HNRNPA1    | 0.3875 | 0.9259 | 0.5480 | 0.6162 | 0.6194 | 0.1128 |
| ANGEL1     | 0.4972 | 0.8060 | 0.5771 | 0.5993 | 0.6199 | 0.0658 |
| DSCC1      | 0.3812 | 0.7196 | 0.6900 | 0.6908 | 0.6204 | 0.0800 |
| MRPL23     | 0.5148 | 0.8067 | 0.6420 | 0.5183 | 0.6205 | 0.0688 |

|            |        |        |        |        |        |        |
|------------|--------|--------|--------|--------|--------|--------|
| DCK        | 0.4623 | 0.8545 | 0.5716 | 0.5946 | 0.6207 | 0.0831 |
| KLHDC5     | 0.4956 | 0.7484 | 0.6280 | 0.6140 | 0.6215 | 0.0517 |
| C12orf24   | 0.3952 | 0.9127 | 0.6111 | 0.5673 | 0.6216 | 0.1076 |
| LSMD1      | 0.4629 | 0.7906 | 0.7202 | 0.5148 | 0.6221 | 0.0790 |
| LSM2       | 0.4739 | 0.7575 | 0.6401 | 0.6175 | 0.6222 | 0.0582 |
| RDH13      | 0.3860 | 0.8216 | 0.7059 | 0.5773 | 0.6227 | 0.0933 |
| RSRC1      | 0.4406 | 0.7359 | 0.7072 | 0.6075 | 0.6228 | 0.0667 |
| SNRPA1     | 0.4269 | 0.7963 | 0.7083 | 0.5598 | 0.6228 | 0.0815 |
| CHTF18     | 0.5395 | 0.8350 | 0.5702 | 0.5477 | 0.6231 | 0.0709 |
| AADAT      | 0.4940 | 0.7967 | 0.6487 | 0.5534 | 0.6232 | 0.0660 |
| LYSMD2     | 0.4289 | 0.7890 | 0.7443 | 0.5314 | 0.6234 | 0.0858 |
| ANG        | 0.5974 | 0.8084 | 0.4991 | 0.5888 | 0.6234 | 0.0655 |
| BUB3       | 0.4817 | 0.7580 | 0.6564 | 0.6011 | 0.6243 | 0.0576 |
| ADA        | 0.4567 | 0.8704 | 0.6030 | 0.5676 | 0.6244 | 0.0877 |
| ME2        | 0.4335 | 0.8668 | 0.6696 | 0.5280 | 0.6245 | 0.0942 |
| VRK1       | 0.3910 | 0.7376 | 0.7995 | 0.5721 | 0.6251 | 0.0916 |
| CLIC4      | 0.5770 | 0.7312 | 0.6349 | 0.5583 | 0.6253 | 0.0389 |
| ACTR2      | 0.5765 | 0.9046 | 0.5333 | 0.4874 | 0.6255 | 0.0948 |
| LSM14A     | 0.5661 | 0.7533 | 0.5979 | 0.5851 | 0.6256 | 0.0431 |
| ZPLD1      | 0.5376 | 0.6656 | 0.7454 | 0.5543 | 0.6257 | 0.0490 |
| LOC653071  | 0.4749 | 0.8548 | 0.7192 | 0.4548 | 0.6259 | 0.0971 |
| TP53RK     | 0.4914 | 0.9005 | 0.5243 | 0.5890 | 0.6263 | 0.0936 |
| C20orf72   | 0.4557 | 0.8980 | 0.6192 | 0.5333 | 0.6266 | 0.0964 |
| SSR1       | 0.4919 | 0.7117 | 0.7620 | 0.5415 | 0.6268 | 0.0652 |
| DPH2       | 0.4803 | 0.7615 | 0.6986 | 0.5668 | 0.6268 | 0.0635 |
| MT2A       | 0.5505 | 0.9342 | 0.5519 | 0.4738 | 0.6276 | 0.1038 |
| LY6E       | 0.4266 | 0.9271 | 0.6625 | 0.4945 | 0.6277 | 0.1114 |
| EDG4       | 0.4612 | 0.7864 | 0.6418 | 0.6216 | 0.6277 | 0.0665 |
| YARS2      | 0.5105 | 0.7253 | 0.7044 | 0.5731 | 0.6283 | 0.0517 |
| NOP58      | 0.4614 | 0.7214 | 0.7763 | 0.5542 | 0.6283 | 0.0730 |
| NEK2       | 0.5227 | 0.7441 | 0.6171 | 0.6299 | 0.6285 | 0.0453 |
| YWHAZ      | 0.4408 | 0.8187 | 0.6532 | 0.6029 | 0.6289 | 0.0778 |
| BOLA2      | 0.4612 | 0.8903 | 0.6078 | 0.5567 | 0.6290 | 0.0922 |
| VEGFB      | 0.5362 | 0.7437 | 0.6949 | 0.5428 | 0.6294 | 0.0529 |
| HNRNPM     | 0.5290 | 0.7996 | 0.5984 | 0.5910 | 0.6295 | 0.0588 |
| LOC728732  | 0.4363 | 0.8098 | 0.7411 | 0.5342 | 0.6303 | 0.0873 |
| LOC1001327 | 0.4624 | 0.7605 | 0.7480 | 0.5508 | 0.6304 | 0.0738 |
| BLMH       | 0.3875 | 0.7777 | 0.6817 | 0.6768 | 0.6309 | 0.0844 |
| ECE2       | 0.4536 | 0.6738 | 0.6995 | 0.6970 | 0.6310 | 0.0594 |
| LBR        | 0.4362 | 0.8703 | 0.6354 | 0.5844 | 0.6316 | 0.0901 |
| GEMIN4     | 0.4536 | 0.8210 | 0.6938 | 0.5604 | 0.6322 | 0.0798 |
| FRAG1      | 0.5123 | 0.7630 | 0.6834 | 0.5703 | 0.6322 | 0.0562 |
| ALG3       | 0.4961 | 0.7953 | 0.6452 | 0.5937 | 0.6326 | 0.0624 |
| CAPN5      | 0.5805 | 0.8130 | 0.6066 | 0.5313 | 0.6328 | 0.0620 |
| NDUFB4     | 0.4578 | 0.8984 | 0.6397 | 0.5361 | 0.6330 | 0.0960 |
| PIGW       | 0.3962 | 0.8326 | 0.6847 | 0.6188 | 0.6331 | 0.0907 |

|            |        |        |        |        |        |        |
|------------|--------|--------|--------|--------|--------|--------|
| MYO5C      | 0.5614 | 0.8035 | 0.5861 | 0.5817 | 0.6332 | 0.0570 |
| LOC1001317 | 0.4498 | 0.9648 | 0.5898 | 0.5286 | 0.6333 | 0.1142 |
| LYRM7      | 0.4766 | 0.8078 | 0.6204 | 0.6286 | 0.6333 | 0.0678 |
| ORC1L      | 0.4492 | 0.7322 | 0.6340 | 0.7185 | 0.6334 | 0.0651 |
| LOC391532  | 0.5720 | 0.6678 | 0.7248 | 0.5693 | 0.6335 | 0.0381 |
| PNN        | 0.5256 | 0.7227 | 0.7618 | 0.5242 | 0.6336 | 0.0632 |
| HADH       | 0.4454 | 0.7753 | 0.7028 | 0.6111 | 0.6336 | 0.0712 |
| MRPL24     | 0.5050 | 0.7613 | 0.6924 | 0.5764 | 0.6338 | 0.0574 |
| WNT10B     | 0.4826 | 0.8055 | 0.6686 | 0.5797 | 0.6341 | 0.0686 |
| LOC649555  | 0.4243 | 0.8898 | 0.7251 | 0.4982 | 0.6343 | 0.1065 |
| PIR        | 0.4365 | 0.7720 | 0.7085 | 0.6207 | 0.6344 | 0.0729 |
| MLH1       | 0.5281 | 0.7800 | 0.7017 | 0.5312 | 0.6352 | 0.0630 |
| C19orf23   | 0.5238 | 0.7232 | 0.6865 | 0.6096 | 0.6357 | 0.0442 |
| TMEM52     | 0.4359 | 0.8518 | 0.6701 | 0.5881 | 0.6365 | 0.0866 |
| YWHAH      | 0.4527 | 0.8393 | 0.7067 | 0.5478 | 0.6366 | 0.0855 |
| ARPP19     | 0.5069 | 0.7137 | 0.6916 | 0.6344 | 0.6367 | 0.0464 |
| CHAF1A     | 0.4798 | 0.7474 | 0.6531 | 0.6666 | 0.6367 | 0.0563 |
| MTMR9      | 0.4776 | 0.8768 | 0.6203 | 0.5744 | 0.6373 | 0.0852 |
| YARS       | 0.5351 | 0.7699 | 0.6729 | 0.5720 | 0.6375 | 0.0529 |
| MGC70857   | 0.5944 | 0.8523 | 0.5896 | 0.5150 | 0.6378 | 0.0738 |
| SFXN4      | 0.4258 | 0.8813 | 0.6588 | 0.5868 | 0.6382 | 0.0945 |
| PGRMC2     | 0.6405 | 0.7085 | 0.6978 | 0.5060 | 0.6382 | 0.0465 |
| DLAT       | 0.4944 | 0.7394 | 0.7254 | 0.5950 | 0.6386 | 0.0580 |
| LOC643319  | 0.4562 | 0.8391 | 0.6100 | 0.6496 | 0.6387 | 0.0787 |
| HNRNPC     | 0.5613 | 0.8023 | 0.6380 | 0.5540 | 0.6389 | 0.0577 |
| ANP32B     | 0.4939 | 0.7642 | 0.6476 | 0.6502 | 0.6390 | 0.0555 |
| PIGC       | 0.4941 | 0.7495 | 0.7169 | 0.5973 | 0.6394 | 0.0585 |
| RPL36A     | 0.4285 | 0.7973 | 0.7457 | 0.5870 | 0.6396 | 0.0834 |
| UBE2Q2     | 0.5002 | 0.7151 | 0.8374 | 0.5061 | 0.6397 | 0.0827 |
| TP53       | 0.5061 | 0.7675 | 0.7001 | 0.5862 | 0.6400 | 0.0582 |
| TMED5      | 0.4692 | 0.8336 | 0.6928 | 0.5644 | 0.6400 | 0.0791 |
| IMPDH2     | 0.3819 | 0.9326 | 0.7817 | 0.4645 | 0.6402 | 0.1301 |
| NUDT19     | 0.3939 | 0.9322 | 0.6593 | 0.5767 | 0.6405 | 0.1119 |
| HNRPA1L-2  | 0.5444 | 0.7430 | 0.7541 | 0.5230 | 0.6411 | 0.0622 |
| ANKRD16    | 0.5767 | 0.7869 | 0.6376 | 0.5642 | 0.6413 | 0.0511 |
| WNT10A     | 0.5257 | 0.7704 | 0.5761 | 0.6942 | 0.6416 | 0.0556 |
| TUBA1B     | 0.4597 | 0.8056 | 0.8051 | 0.4962 | 0.6417 | 0.0948 |
| VBP1       | 0.4883 | 0.8262 | 0.7044 | 0.5509 | 0.6425 | 0.0762 |
| EBNA1BP2   | 0.4401 | 0.8092 | 0.7842 | 0.5365 | 0.6425 | 0.0913 |
| ASCC1      | 0.5464 | 0.8177 | 0.6423 | 0.5644 | 0.6427 | 0.0619 |
| BMP6       | 0.4651 | 0.7385 | 0.7666 | 0.6011 | 0.6428 | 0.0694 |
| LOC1001328 | 0.4826 | 0.7989 | 0.7212 | 0.5702 | 0.6432 | 0.0715 |
| NTHL1      | 0.5210 | 0.8991 | 0.5271 | 0.6272 | 0.6436 | 0.0886 |
| MLST8      | 0.4900 | 0.8330 | 0.7114 | 0.5412 | 0.6439 | 0.0788 |
| LOC1001340 | 0.4096 | 0.9160 | 0.6893 | 0.5611 | 0.6440 | 0.1072 |
| C17orf53   | 0.5014 | 0.7801 | 0.6231 | 0.6714 | 0.6440 | 0.0578 |

|            |        |        |        |        |        |        |
|------------|--------|--------|--------|--------|--------|--------|
| MRPL15     | 0.5319 | 0.7324 | 0.8117 | 0.5000 | 0.6440 | 0.0760 |
| CACYBP     | 0.4500 | 0.8949 | 0.6394 | 0.5923 | 0.6442 | 0.0928 |
| LRP8       | 0.4858 | 0.7934 | 0.6481 | 0.6503 | 0.6444 | 0.0629 |
| HIRIP3     | 0.4787 | 0.8365 | 0.6996 | 0.5629 | 0.6444 | 0.0785 |
| SLC4A7     | 0.4903 | 0.8105 | 0.7104 | 0.5669 | 0.6445 | 0.0717 |
| IARS       | 0.5438 | 0.8622 | 0.6261 | 0.5474 | 0.6449 | 0.0749 |
| LEF1       | 0.5921 | 0.7182 | 0.6264 | 0.6430 | 0.6449 | 0.0266 |
| PRR7       | 0.4954 | 0.8623 | 0.6191 | 0.6040 | 0.6452 | 0.0774 |
| LOC1001341 | 0.5925 | 0.8059 | 0.5769 | 0.6063 | 0.6454 | 0.0538 |
| RCN1       | 0.6034 | 0.7084 | 0.7314 | 0.5392 | 0.6456 | 0.0451 |
| TMPO       | 0.4912 | 0.8105 | 0.6465 | 0.6352 | 0.6459 | 0.0653 |
| RPL29      | 0.4099 | 0.9096 | 0.7305 | 0.5351 | 0.6463 | 0.1098 |
| LOC645691  | 0.4463 | 0.7551 | 0.8065 | 0.5777 | 0.6464 | 0.0828 |
| TMEM97     | 0.4580 | 0.8551 | 0.6930 | 0.5817 | 0.6470 | 0.0844 |
| LOC1001301 | 0.4633 | 0.7917 | 0.7782 | 0.5554 | 0.6472 | 0.0818 |
| EBP        | 0.5044 | 0.8470 | 0.6642 | 0.5731 | 0.6472 | 0.0742 |
| LOC388275  | 0.4363 | 1.0004 | 0.6205 | 0.5319 | 0.6472 | 0.1236 |
| SNHG9      | 0.5969 | 0.7991 | 0.7134 | 0.4810 | 0.6476 | 0.0693 |
| C13orf37   | 0.4527 | 0.7914 | 0.7368 | 0.6099 | 0.6477 | 0.0753 |
| LOC493869  | 0.5134 | 0.6992 | 0.7658 | 0.6125 | 0.6477 | 0.0547 |
| LOC1001305 | 0.4665 | 0.8581 | 0.6184 | 0.6479 | 0.6477 | 0.0806 |
| SFRS3      | 0.5431 | 0.8096 | 0.7121 | 0.5281 | 0.6482 | 0.0681 |
| FAM136A    | 0.4913 | 0.8735 | 0.6811 | 0.5479 | 0.6484 | 0.0849 |
| DNMT1      | 0.5378 | 0.8196 | 0.7068 | 0.5299 | 0.6485 | 0.0701 |
| FAM116A    | 0.5207 | 0.7713 | 0.7390 | 0.5634 | 0.6486 | 0.0625 |
| ZNF239     | 0.4467 | 0.7879 | 0.7382 | 0.6226 | 0.6489 | 0.0758 |
| TIMM23     | 0.5326 | 0.8216 | 0.6761 | 0.5659 | 0.6490 | 0.0652 |
| MRPS6      | 0.5079 | 0.7667 | 0.7406 | 0.5831 | 0.6496 | 0.0623 |
| CMTM7      | 0.4570 | 0.8151 | 0.7403 | 0.5872 | 0.6499 | 0.0799 |
| HNRPA1P4   | 0.4295 | 1.0410 | 0.6469 | 0.4828 | 0.6501 | 0.1383 |
| SNRPB      | 0.5166 | 0.8046 | 0.6993 | 0.5808 | 0.6503 | 0.0638 |
| TACC3      | 0.4993 | 0.8049 | 0.6912 | 0.6059 | 0.6503 | 0.0648 |
| CYC1       | 0.5100 | 0.8960 | 0.6609 | 0.5354 | 0.6506 | 0.0882 |
| HSPC111    | 0.4850 | 0.8638 | 0.6624 | 0.5927 | 0.6510 | 0.0798 |
| ALG6       | 0.4753 | 0.7758 | 0.7337 | 0.6207 | 0.6514 | 0.0672 |
| MGC61598   | 0.5211 | 0.9444 | 0.6036 | 0.5393 | 0.6521 | 0.0990 |
| GHR        | 0.4580 | 0.8162 | 0.7647 | 0.5698 | 0.6522 | 0.0837 |
| FKBP11     | 0.5613 | 0.8462 | 0.6618 | 0.5395 | 0.6522 | 0.0699 |
| DONSON     | 0.5403 | 0.7463 | 0.6827 | 0.6405 | 0.6524 | 0.0432 |
| ALG8       | 0.5111 | 0.8186 | 0.7090 | 0.5718 | 0.6526 | 0.0691 |
| ADCY3      | 0.5454 | 0.8150 | 0.6799 | 0.5708 | 0.6528 | 0.0614 |
| LOC643357  | 0.5541 | 0.8155 | 0.6701 | 0.5720 | 0.6529 | 0.0599 |
| TIMM9      | 0.5126 | 0.7420 | 0.7675 | 0.5912 | 0.6533 | 0.0609 |
| SNRPA      | 0.5471 | 0.8554 | 0.6411 | 0.5700 | 0.6534 | 0.0702 |
| PAQR4      | 0.5628 | 0.8535 | 0.5543 | 0.6476 | 0.6546 | 0.0696 |
| NIPA1      | 0.6093 | 0.7797 | 0.7177 | 0.5119 | 0.6546 | 0.0592 |

|            |        |        |        |        |        |        |
|------------|--------|--------|--------|--------|--------|--------|
| NOP56      | 0.4377 | 0.7665 | 0.8641 | 0.5507 | 0.6547 | 0.0976 |
| TGM3       | 0.4740 | 0.9725 | 0.6157 | 0.5573 | 0.6549 | 0.1098 |
| PTRH1      | 0.4475 | 0.8667 | 0.6938 | 0.6116 | 0.6549 | 0.0872 |
| HSD3B7     | 0.5336 | 0.8342 | 0.6443 | 0.6086 | 0.6552 | 0.0640 |
| EI24       | 0.4843 | 0.7981 | 0.7655 | 0.5731 | 0.6552 | 0.0756 |
| CCND1      | 0.5447 | 0.8687 | 0.6407 | 0.5675 | 0.6554 | 0.0740 |
| TH1L       | 0.5062 | 0.9402 | 0.6052 | 0.5706 | 0.6556 | 0.0971 |
| FAM91A1    | 0.5220 | 0.8535 | 0.6754 | 0.5724 | 0.6558 | 0.0732 |
| PSRC1      | 0.4795 | 0.7659 | 0.7200 | 0.6586 | 0.6560 | 0.0628 |
| RNMT       | 0.5018 | 0.8293 | 0.6871 | 0.6064 | 0.6561 | 0.0691 |
| NIF3L1     | 0.5344 | 0.7674 | 0.7490 | 0.5740 | 0.6562 | 0.0596 |
| ATL2       | 0.5199 | 0.7693 | 0.6825 | 0.6539 | 0.6564 | 0.0517 |
| PUS7       | 0.4809 | 0.7754 | 0.6978 | 0.6723 | 0.6566 | 0.0626 |
| TYSND1     | 0.5046 | 0.8404 | 0.6978 | 0.5847 | 0.6569 | 0.0729 |
| ZCCHC17    | 0.5143 | 0.8631 | 0.6296 | 0.6235 | 0.6576 | 0.0734 |
| SFRS10     | 0.4494 | 0.9264 | 0.7526 | 0.5028 | 0.6578 | 0.1113 |
| C16orf33   | 0.5068 | 0.8283 | 0.7108 | 0.5864 | 0.6581 | 0.0706 |
| MTERFD1    | 0.4450 | 0.8759 | 0.6851 | 0.6268 | 0.6582 | 0.0888 |
| TIMM10     | 0.5144 | 0.7691 | 0.7494 | 0.5998 | 0.6582 | 0.0610 |
| CCT6A      | 0.4885 | 0.8309 | 0.8177 | 0.4986 | 0.6589 | 0.0955 |
| RAI14      | 0.5185 | 0.8627 | 0.5769 | 0.6780 | 0.6590 | 0.0755 |
| CHEK2      | 0.5058 | 0.7593 | 0.7208 | 0.6503 | 0.6590 | 0.0558 |
| PIK3C2A    | 0.5447 | 0.7922 | 0.7310 | 0.5683 | 0.6591 | 0.0607 |
| TMEM194    | 0.4671 | 0.7992 | 0.7421 | 0.6278 | 0.6591 | 0.0732 |
| LDHB       | 0.4290 | 0.8108 | 0.8383 | 0.5585 | 0.6591 | 0.0992 |
| MRPL9      | 0.6094 | 0.7379 | 0.7265 | 0.5632 | 0.6592 | 0.0432 |
| MBP        | 0.5047 | 0.8108 | 0.7026 | 0.6198 | 0.6595 | 0.0647 |
| PPTC7      | 0.4592 | 0.9071 | 0.6500 | 0.6229 | 0.6598 | 0.0926 |
| IMPA2      | 0.5675 | 0.8885 | 0.6132 | 0.5701 | 0.6598 | 0.0770 |
| LOC653506  | 0.5866 | 0.8535 | 0.6658 | 0.5345 | 0.6601 | 0.0699 |
| NARG1      | 0.5008 | 0.7731 | 0.7260 | 0.6405 | 0.6601 | 0.0598 |
| SPIN4      | 0.4888 | 0.7768 | 0.7995 | 0.5753 | 0.6601 | 0.0762 |
| TBRG4      | 0.5658 | 0.7870 | 0.6582 | 0.6296 | 0.6602 | 0.0465 |
| LOC642031  | 0.5413 | 0.9046 | 0.6682 | 0.5277 | 0.6604 | 0.0873 |
| FCRLB      | 0.6280 | 0.7656 | 0.6351 | 0.6139 | 0.6607 | 0.0353 |
| STT3B      | 0.5046 | 0.7721 | 0.7389 | 0.6276 | 0.6608 | 0.0605 |
| FANCD2     | 0.5409 | 0.7123 | 0.7486 | 0.6422 | 0.6610 | 0.0457 |
| LOC1001334 | 0.4912 | 0.9363 | 0.5561 | 0.6608 | 0.6611 | 0.0982 |
| BRIX1      | 0.4374 | 0.8050 | 0.7634 | 0.6400 | 0.6615 | 0.0825 |
| PSMG2      | 0.4973 | 0.8650 | 0.7480 | 0.5359 | 0.6616 | 0.0874 |
| GATC       | 0.4566 | 0.9379 | 0.6710 | 0.5812 | 0.6617 | 0.1020 |
| NOP16      | 0.4641 | 0.9426 | 0.6413 | 0.5993 | 0.6618 | 0.1009 |
| EEF1E1     | 0.6169 | 0.7752 | 0.7090 | 0.5482 | 0.6624 | 0.0500 |
| ELOVL6     | 0.5218 | 0.7798 | 0.7298 | 0.6194 | 0.6627 | 0.0577 |
| HDDC3      | 0.5175 | 0.8538 | 0.6196 | 0.6611 | 0.6630 | 0.0704 |
| SGOL2      | 0.5034 | 0.8563 | 0.6272 | 0.6652 | 0.6630 | 0.0731 |

|           |        |        |        |        |        |        |
|-----------|--------|--------|--------|--------|--------|--------|
| IMP4      | 0.4515 | 0.8740 | 0.7179 | 0.6089 | 0.6631 | 0.0891 |
| KIF23     | 0.5238 | 0.7364 | 0.7237 | 0.6692 | 0.6633 | 0.0487 |
| RAD51C    | 0.4617 | 0.8637 | 0.7235 | 0.6044 | 0.6633 | 0.0856 |
| C19orf48  | 0.5326 | 0.8524 | 0.7081 | 0.5612 | 0.6635 | 0.0738 |
| MYO19     | 0.5059 | 0.8173 | 0.6969 | 0.6341 | 0.6635 | 0.0649 |
| SLC46A1   | 0.4975 | 0.8710 | 0.7268 | 0.5598 | 0.6638 | 0.0843 |
| CCDC85B   | 0.4613 | 0.8919 | 0.7592 | 0.5429 | 0.6638 | 0.0986 |
| SLC12A2   | 0.5238 | 0.7987 | 0.7177 | 0.6155 | 0.6639 | 0.0599 |
| LOC730820 | 0.6297 | 0.7782 | 0.6053 | 0.6429 | 0.6640 | 0.0388 |
| SLC19A1   | 0.5536 | 0.8313 | 0.6715 | 0.5997 | 0.6640 | 0.0608 |
| CYP2R1    | 0.5833 | 0.7652 | 0.6645 | 0.6432 | 0.6640 | 0.0378 |
| BOLA3     | 0.5404 | 0.8570 | 0.7045 | 0.5565 | 0.6646 | 0.0740 |
| MRPS27    | 0.5203 | 0.8599 | 0.6508 | 0.6275 | 0.6647 | 0.0710 |
| THOC4     | 0.3985 | 0.8890 | 0.7628 | 0.6090 | 0.6648 | 0.1056 |
| LOC390466 | 0.5198 | 0.9324 | 0.6052 | 0.6020 | 0.6649 | 0.0914 |
| C11orf71  | 0.4992 | 0.9240 | 0.7107 | 0.5261 | 0.6650 | 0.0983 |
| SRM       | 0.4975 | 0.8631 | 0.7464 | 0.5533 | 0.6651 | 0.0849 |
| TYW3      | 0.5148 | 0.8253 | 0.6689 | 0.6551 | 0.6660 | 0.0635 |
| SLC35F2   | 0.5549 | 0.8240 | 0.7282 | 0.5575 | 0.6661 | 0.0664 |
| ACYP1     | 0.5275 | 0.8451 | 0.6447 | 0.6472 | 0.6661 | 0.0659 |
| LOC652481 | 0.5167 | 0.9481 | 0.6398 | 0.5612 | 0.6664 | 0.0973 |
| SLC31A1   | 0.4596 | 0.7627 | 0.7434 | 0.7008 | 0.6666 | 0.0702 |
| IGF2BP3   | 0.4953 | 0.8753 | 0.6960 | 0.6003 | 0.6667 | 0.0807 |
| SNAPC4    | 0.5093 | 0.9399 | 0.6330 | 0.5852 | 0.6668 | 0.0945 |
| LOC255783 | 0.5189 | 0.9206 | 0.6270 | 0.6008 | 0.6668 | 0.0877 |
| RALBP1    | 0.5950 | 0.7328 | 0.7069 | 0.6327 | 0.6669 | 0.0320 |
| CFDP1     | 0.6024 | 0.8155 | 0.6035 | 0.6464 | 0.6669 | 0.0506 |
| DTL       | 0.4997 | 0.7683 | 0.7603 | 0.6411 | 0.6673 | 0.0630 |
| HAUS8     | 0.5001 | 0.7892 | 0.7007 | 0.6796 | 0.6674 | 0.0606 |
| TOMM40    | 0.3778 | 0.8605 | 0.7401 | 0.6915 | 0.6675 | 0.1029 |
| SNX26     | 0.6530 | 0.8063 | 0.5757 | 0.6353 | 0.6676 | 0.0491 |
| TRUB1     | 0.3417 | 1.0425 | 0.7496 | 0.5366 | 0.6676 | 0.1502 |
| MRPL1     | 0.4836 | 0.6821 | 0.9848 | 0.5205 | 0.6678 | 0.1141 |
| UBL3      | 0.5882 | 0.8865 | 0.6506 | 0.5462 | 0.6679 | 0.0760 |
| PA2G4     | 0.4970 | 0.8774 | 0.7053 | 0.5921 | 0.6680 | 0.0818 |
| SAAL1     | 0.4803 | 0.7676 | 0.7365 | 0.6875 | 0.6680 | 0.0647 |
| DR1       | 0.5030 | 0.7194 | 0.8885 | 0.5611 | 0.6680 | 0.0866 |
| CARS      | 0.6735 | 0.7987 | 0.6225 | 0.5775 | 0.6680 | 0.0478 |
| PKMYT1    | 0.5202 | 0.7843 | 0.6675 | 0.7007 | 0.6682 | 0.0551 |
| AUH       | 0.6119 | 0.8707 | 0.6022 | 0.5883 | 0.6683 | 0.0677 |
| GLS       | 0.5712 | 0.7959 | 0.7696 | 0.5378 | 0.6686 | 0.0665 |
| NAT10     | 0.5255 | 0.8203 | 0.6649 | 0.6639 | 0.6687 | 0.0602 |
| E2F5      | 0.4917 | 0.9507 | 0.6250 | 0.6077 | 0.6688 | 0.0985 |
| HMGA1     | 0.5655 | 0.7592 | 0.7008 | 0.6497 | 0.6688 | 0.0411 |
| SNORA67   | 0.4338 | 0.8433 | 0.7878 | 0.6102 | 0.6688 | 0.0928 |
| ARL2BP    | 0.4926 | 1.0441 | 0.6529 | 0.4862 | 0.6690 | 0.1309 |



|            |        |        |        |        |        |        |
|------------|--------|--------|--------|--------|--------|--------|
| SHC1       | 0.5918 | 0.7607 | 0.6286 | 0.6949 | 0.6690 | 0.0373 |
| SMC2       | 0.5002 | 0.8036 | 0.7473 | 0.6258 | 0.6692 | 0.0675 |
| CCDC5      | 0.5075 | 0.8413 | 0.6855 | 0.6440 | 0.6696 | 0.0687 |
| SEH1L      | 0.4691 | 0.9198 | 0.6875 | 0.6040 | 0.6701 | 0.0946 |
| LOC730183  | 0.5987 | 0.8433 | 0.6275 | 0.6111 | 0.6701 | 0.0580 |
| SLC29A3    | 0.6240 | 0.7316 | 0.6455 | 0.6795 | 0.6702 | 0.0235 |
| GFPT1      | 0.6415 | 0.7773 | 0.6725 | 0.5896 | 0.6702 | 0.0396 |
| E2F7       | 0.4929 | 0.8043 | 0.6742 | 0.7103 | 0.6704 | 0.0652 |
| ETFDH      | 0.6146 | 0.7622 | 0.7177 | 0.5881 | 0.6707 | 0.0414 |
| LIN52      | 0.4741 | 0.8500 | 0.7860 | 0.5730 | 0.6708 | 0.0883 |
| CDCA1      | 0.5225 | 0.7515 | 0.6654 | 0.7438 | 0.6708 | 0.0531 |
| UGT2B10    | 0.5185 | 0.7892 | 0.7217 | 0.6539 | 0.6708 | 0.0578 |
| ALB        | 0.4974 | 0.7796 | 0.6999 | 0.7091 | 0.6715 | 0.0607 |
| LOC1001295 | 0.4939 | 0.9044 | 0.6865 | 0.6015 | 0.6716 | 0.0870 |
| ATP5G3     | 0.6132 | 0.7927 | 0.6287 | 0.6522 | 0.6717 | 0.0411 |
| SSRP1      | 0.5054 | 0.7624 | 0.7971 | 0.6225 | 0.6719 | 0.0671 |
| ENDOG      | 0.4844 | 0.9970 | 0.6577 | 0.5486 | 0.6719 | 0.1141 |
| MARS       | 0.7264 | 0.8412 | 0.6159 | 0.5045 | 0.6720 | 0.0723 |
| KTELC1     | 0.4984 | 0.8451 | 0.7151 | 0.6295 | 0.6720 | 0.0729 |
| C16orf48   | 0.5617 | 0.8222 | 0.6964 | 0.6077 | 0.6720 | 0.0573 |
| C7orf23    | 0.5288 | 0.9516 | 0.6206 | 0.5873 | 0.6721 | 0.0951 |
| ARMET      | 0.5411 | 0.8425 | 0.7316 | 0.5738 | 0.6722 | 0.0704 |
| PCK2       | 0.6663 | 0.7961 | 0.6229 | 0.6037 | 0.6722 | 0.0433 |
| CSE1L      | 0.5329 | 0.9181 | 0.7011 | 0.5374 | 0.6724 | 0.0908 |
| CXCL16     | 0.5432 | 0.8417 | 0.6636 | 0.6414 | 0.6725 | 0.0622 |
| MRPS17     | 0.4823 | 0.8036 | 0.8572 | 0.5472 | 0.6726 | 0.0927 |
| UIMC1      | 0.4634 | 0.9692 | 0.6145 | 0.6443 | 0.6728 | 0.1064 |
| DNAJA3     | 0.5048 | 0.9061 | 0.7330 | 0.5475 | 0.6729 | 0.0922 |
| C3orf26    | 0.4766 | 0.9994 | 0.7059 | 0.5109 | 0.6732 | 0.1199 |
| ACN9       | 0.5566 | 0.8408 | 0.7394 | 0.5564 | 0.6733 | 0.0705 |
| LOC646817  | 0.3385 | 1.1014 | 0.7242 | 0.5305 | 0.6737 | 0.1629 |
| WDR67      | 0.5668 | 0.7950 | 0.6319 | 0.7012 | 0.6737 | 0.0489 |
| ERI2       | 0.5326 | 0.8653 | 0.6970 | 0.6011 | 0.6740 | 0.0721 |
| PLEKHG3    | 0.5155 | 0.8561 | 0.6353 | 0.6892 | 0.6740 | 0.0707 |
| DSN1       | 0.5866 | 0.8145 | 0.6961 | 0.6000 | 0.6743 | 0.0527 |
| RBPJ       | 0.4866 | 0.9085 | 0.6681 | 0.6342 | 0.6743 | 0.0874 |
| TMEM62     | 0.5864 | 0.8494 | 0.6026 | 0.6598 | 0.6746 | 0.0604 |
| PFKFB3     | 0.5731 | 0.8387 | 0.6566 | 0.6311 | 0.6749 | 0.0573 |
| HSPA14     | 0.5021 | 0.8594 | 0.7593 | 0.5789 | 0.6749 | 0.0818 |
| IMMT       | 0.5644 | 0.7188 | 0.8477 | 0.5689 | 0.6750 | 0.0678 |
| LAGE3      | 0.5667 | 0.9039 | 0.6779 | 0.5524 | 0.6752 | 0.0812 |
| CENPL      | 0.4573 | 0.9248 | 0.7687 | 0.5509 | 0.6755 | 0.1057 |
| HIST1H4C   | 0.5008 | 0.9305 | 0.7228 | 0.5485 | 0.6756 | 0.0974 |
| RNASE4     | 0.6090 | 0.8435 | 0.5944 | 0.6558 | 0.6757 | 0.0575 |
| GLRX5      | 0.6127 | 0.8257 | 0.7022 | 0.5629 | 0.6759 | 0.0576 |
| TOMM70A    | 0.5136 | 0.8405 | 0.7972 | 0.5522 | 0.6759 | 0.0834 |

|           |        |        |        |        |        |        |
|-----------|--------|--------|--------|--------|--------|--------|
| HDDC2     | 0.5348 | 0.7428 | 0.8141 | 0.6124 | 0.6760 | 0.0629 |
| SCML2     | 0.5127 | 0.7701 | 0.7619 | 0.6598 | 0.6761 | 0.0600 |
| MRPL11    | 0.3984 | 0.8506 | 0.7786 | 0.6773 | 0.6762 | 0.0992 |
| PPIA      | 0.5406 | 0.7808 | 0.8117 | 0.5730 | 0.6765 | 0.0697 |
| CTBP1     | 0.5320 | 0.8911 | 0.7028 | 0.5807 | 0.6767 | 0.0800 |
| BLM       | 0.5631 | 0.7436 | 0.7251 | 0.6762 | 0.6770 | 0.0405 |
| SNORA10   | 0.4984 | 0.8532 | 0.6760 | 0.6805 | 0.6770 | 0.0724 |
| XRCC6BP1  | 0.4836 | 0.7929 | 0.8118 | 0.6212 | 0.6774 | 0.0775 |
| PDHX      | 0.4594 | 0.9115 | 0.8338 | 0.5051 | 0.6775 | 0.1142 |
| RPL23A    | 0.4705 | 0.7706 | 0.9078 | 0.5613 | 0.6776 | 0.0992 |
| FBXO46    | 0.6087 | 0.8880 | 0.6082 | 0.6054 | 0.6776 | 0.0701 |
| TCP1      | 0.5408 | 0.7638 | 0.8421 | 0.5648 | 0.6779 | 0.0741 |
| BPHL      | 0.5463 | 0.8660 | 0.6383 | 0.6613 | 0.6780 | 0.0674 |
| C3orf21   | 0.5824 | 0.8351 | 0.6968 | 0.5982 | 0.6781 | 0.0581 |
| C14orf126 | 0.4839 | 0.9717 | 0.7072 | 0.5501 | 0.6782 | 0.1085 |
| FAM125A   | 0.5976 | 0.7818 | 0.7063 | 0.6273 | 0.6782 | 0.0414 |
| RPA3      | 0.6357 | 0.7829 | 0.7051 | 0.5895 | 0.6783 | 0.0422 |
| MGC3731   | 0.5146 | 0.9605 | 0.6702 | 0.5683 | 0.6784 | 0.0994 |
| LSM4      | 0.4912 | 0.9215 | 0.6830 | 0.6179 | 0.6784 | 0.0903 |
| LOC648210 | 0.4107 | 0.9650 | 0.7643 | 0.5738 | 0.6784 | 0.1198 |
| MRPS35    | 0.4385 | 0.9183 | 0.8042 | 0.5532 | 0.6786 | 0.1105 |
| HIST1H2BJ | 0.2703 | 1.1521 | 0.7512 | 0.5407 | 0.6786 | 0.1860 |
| REEP4     | 0.6046 | 0.7163 | 0.6918 | 0.7023 | 0.6787 | 0.0252 |
| NARS2     | 0.5983 | 0.7570 | 0.7990 | 0.5609 | 0.6788 | 0.0584 |
| HNRPH1    | 0.6255 | 0.7677 | 0.7457 | 0.5762 | 0.6788 | 0.0463 |
| TTR       | 0.4355 | 1.0754 | 0.6994 | 0.5049 | 0.6788 | 0.1435 |
| LOC391811 | 0.4814 | 0.8669 | 0.6695 | 0.6977 | 0.6789 | 0.0790 |
| AFMID     | 0.5362 | 0.9060 | 0.6857 | 0.5892 | 0.6793 | 0.0817 |
| C20orf20  | 0.5791 | 0.8616 | 0.6555 | 0.6212 | 0.6793 | 0.0627 |
| CLINT1    | 0.5305 | 0.9653 | 0.6971 | 0.5247 | 0.6794 | 0.1033 |
| CISD1     | 0.4548 | 0.8990 | 0.7876 | 0.5764 | 0.6794 | 0.1004 |
| C1orf93   | 0.7888 | 0.5806 | 0.6613 | 0.6874 | 0.6795 | 0.0429 |
| LDHA      | 0.5513 | 0.9005 | 0.6753 | 0.5914 | 0.6796 | 0.0780 |
| FAM189B   | 0.5128 | 0.9361 | 0.6573 | 0.6125 | 0.6797 | 0.0907 |
| CBX2      | 0.5136 | 0.8285 | 0.6797 | 0.6975 | 0.6798 | 0.0646 |
| ITGB3BP   | 0.6124 | 0.7222 | 0.7980 | 0.5867 | 0.6798 | 0.0491 |
| ARL6IP1   | 0.6187 | 0.8760 | 0.6947 | 0.5309 | 0.6801 | 0.0734 |
| GTF2H2B   | 0.4373 | 0.9505 | 0.7307 | 0.6038 | 0.6806 | 0.1082 |
| PPIH      | 0.4779 | 0.9180 | 0.7620 | 0.5646 | 0.6806 | 0.0990 |
| EXOSC6    | 0.4619 | 0.9104 | 0.6926 | 0.6581 | 0.6808 | 0.0919 |
| DOLK      | 0.6016 | 0.8112 | 0.6455 | 0.6663 | 0.6812 | 0.0454 |
| NXT1      | 0.4290 | 0.8820 | 0.7795 | 0.6343 | 0.6812 | 0.0982 |
| TMEM99    | 0.6139 | 0.8806 | 0.6928 | 0.5379 | 0.6813 | 0.0736 |
| MAPK3     | 0.7128 | 0.8508 | 0.5763 | 0.5853 | 0.6813 | 0.0645 |
| RPL22L1   | 0.5881 | 0.8127 | 0.7418 | 0.5834 | 0.6815 | 0.0571 |
| RRAGD     | 0.5678 | 0.7646 | 0.8029 | 0.5918 | 0.6818 | 0.0596 |

|            |        |        |        |        |        |        |
|------------|--------|--------|--------|--------|--------|--------|
| TMEM160    | 0.5579 | 0.9184 | 0.6361 | 0.6150 | 0.6819 | 0.0806 |
| COQ3       | 0.5097 | 0.9250 | 0.6800 | 0.6128 | 0.6819 | 0.0883 |
| PUS1       | 0.5242 | 0.9215 | 0.6931 | 0.5892 | 0.6820 | 0.0871 |
| WDR54      | 0.4787 | 0.9685 | 0.6853 | 0.5955 | 0.6820 | 0.1044 |
| USP1       | 0.5122 | 0.9060 | 0.6979 | 0.6120 | 0.6820 | 0.0838 |
| CREBZF     | 0.6288 | 0.8875 | 0.6439 | 0.5695 | 0.6824 | 0.0702 |
| LOC644879  | 0.5283 | 0.8767 | 0.7139 | 0.6112 | 0.6825 | 0.0750 |
| ZBTB33     | 0.5545 | 0.8213 | 0.7780 | 0.5764 | 0.6825 | 0.0683 |
| UCK2       | 0.4904 | 0.9030 | 0.7434 | 0.5940 | 0.6827 | 0.0899 |
| TDG        | 0.5243 | 0.8720 | 0.7263 | 0.6093 | 0.6830 | 0.0754 |
| GSG2       | 0.4939 | 0.7622 | 0.7289 | 0.7471 | 0.6831 | 0.0634 |
| C21orf45   | 0.5863 | 0.7577 | 0.7321 | 0.6567 | 0.6832 | 0.0388 |
| PDLIM1     | 0.5483 | 0.8219 | 0.7045 | 0.6582 | 0.6832 | 0.0567 |
| LOC400506  | 0.4682 | 0.9618 | 0.6839 | 0.6194 | 0.6833 | 0.1033 |
| HSPH1      | 0.5002 | 0.9114 | 0.7286 | 0.5934 | 0.6834 | 0.0893 |
| TOMM5      | 0.5122 | 0.8440 | 0.8095 | 0.5679 | 0.6834 | 0.0838 |
| TIA1       | 0.6078 | 0.8491 | 0.6312 | 0.6457 | 0.6835 | 0.0558 |
| C20orf134  | 0.4662 | 0.9446 | 0.6786 | 0.6445 | 0.6835 | 0.0987 |
| RCN3       | 0.5782 | 0.8204 | 0.7024 | 0.6341 | 0.6838 | 0.0521 |
| NUP210     | 0.5387 | 0.8845 | 0.5759 | 0.7360 | 0.6838 | 0.0794 |
| SHMT2      | 0.4940 | 0.9437 | 0.7200 | 0.5775 | 0.6838 | 0.0984 |
| CCDC138    | 0.5442 | 0.8224 | 0.7795 | 0.5893 | 0.6839 | 0.0688 |
| LOC391075  | 0.4001 | 1.0057 | 0.8260 | 0.5039 | 0.6839 | 0.1404 |
| UBIAD1     | 0.4410 | 1.0763 | 0.6944 | 0.5252 | 0.6842 | 0.1409 |
| SF3B1      | 0.5939 | 0.8499 | 0.6398 | 0.6535 | 0.6843 | 0.0567 |
| LOC730083  | 0.5253 | 0.8530 | 0.7837 | 0.5756 | 0.6844 | 0.0793 |
| LOC283267  | 0.6293 | 0.7474 | 0.6358 | 0.7252 | 0.6844 | 0.0303 |
| MED16      | 0.6834 | 0.8013 | 0.6101 | 0.6430 | 0.6845 | 0.0417 |
| PLK1       | 0.5749 | 0.7561 | 0.7737 | 0.6334 | 0.6845 | 0.0480 |
| MRPL19     | 0.5244 | 0.7611 | 0.9033 | 0.5497 | 0.6846 | 0.0902 |
| SLC25A10   | 0.5345 | 0.8550 | 0.7612 | 0.5881 | 0.6847 | 0.0746 |
| GRPEL2     | 0.6264 | 0.8684 | 0.7449 | 0.5002 | 0.6849 | 0.0790 |
| NIPA2      | 0.6697 | 0.8102 | 0.6416 | 0.6189 | 0.6851 | 0.0430 |
| CIAPIN1    | 0.5588 | 0.8353 | 0.8377 | 0.5103 | 0.6855 | 0.0877 |
| LOC147727  | 0.6319 | 0.8542 | 0.7183 | 0.5380 | 0.6856 | 0.0672 |
| CSTF2      | 0.4614 | 0.8179 | 0.8872 | 0.5760 | 0.6856 | 0.1002 |
| LOC1001329 | 0.5180 | 0.8386 | 0.7603 | 0.6259 | 0.6857 | 0.0711 |
| MRPL2      | 0.5295 | 0.9439 | 0.6879 | 0.5823 | 0.6859 | 0.0921 |
| C14orf106  | 0.5768 | 0.7490 | 0.7619 | 0.6561 | 0.6860 | 0.0434 |
| NDE1       | 0.5931 | 0.8225 | 0.7011 | 0.6278 | 0.6861 | 0.0507 |
| RPS21      | 0.5088 | 0.8258 | 0.7729 | 0.6368 | 0.6861 | 0.0713 |
| TUBGCP4    | 0.5278 | 0.8187 | 0.7432 | 0.6547 | 0.6861 | 0.0625 |
| LOC644877  | 0.4877 | 0.8574 | 0.7615 | 0.6408 | 0.6869 | 0.0798 |
| BFAR       | 0.5480 | 0.8329 | 0.7119 | 0.6549 | 0.6869 | 0.0593 |
| WRNIP1     | 0.5758 | 0.8310 | 0.7263 | 0.6151 | 0.6871 | 0.0576 |
| RRP7A      | 0.5023 | 0.8931 | 0.7473 | 0.6057 | 0.6871 | 0.0851 |

|            |        |        |        |        |        |        |
|------------|--------|--------|--------|--------|--------|--------|
| NCL        | 0.4891 | 0.9259 | 0.7060 | 0.6281 | 0.6873 | 0.0913 |
| RTN4IP1    | 0.5365 | 0.8641 | 0.7366 | 0.6127 | 0.6875 | 0.0719 |
| UPF3B      | 0.6003 | 0.8866 | 0.6340 | 0.6292 | 0.6875 | 0.0668 |
| RAD21      | 0.4875 | 0.9126 | 0.7798 | 0.5712 | 0.6878 | 0.0969 |
| LOC1001343 | 0.4225 | 0.8554 | 0.9515 | 0.5218 | 0.6878 | 0.1277 |
| MAGEA12    | 0.5509 | 0.8322 | 0.7415 | 0.6269 | 0.6879 | 0.0620 |
| LOC643287  | 0.5283 | 0.8064 | 0.7998 | 0.6170 | 0.6879 | 0.0690 |
| ARHGAP19   | 0.6245 | 0.8865 | 0.6743 | 0.5683 | 0.6884 | 0.0695 |
| ADCK4      | 0.5755 | 0.9168 | 0.6399 | 0.6217 | 0.6885 | 0.0773 |
| LOC645249  | 0.5093 | 0.8553 | 0.7501 | 0.6398 | 0.6886 | 0.0742 |
| OXA1L      | 0.4953 | 1.0573 | 0.6762 | 0.5259 | 0.6887 | 0.1291 |
| YEATS4     | 0.5551 | 0.8370 | 0.8000 | 0.5634 | 0.6889 | 0.0752 |
| MRPL12     | 0.5346 | 0.8283 | 0.7633 | 0.6293 | 0.6889 | 0.0660 |
| STAU1      | 0.5233 | 0.8211 | 0.8101 | 0.6012 | 0.6889 | 0.0749 |
| PHLDA2     | 0.5814 | 0.8417 | 0.7329 | 0.5999 | 0.6890 | 0.0611 |
| SLC25A22   | 0.4986 | 0.9437 | 0.6519 | 0.6624 | 0.6892 | 0.0927 |
| EXOSC8     | 0.3185 | 1.3352 | 0.6191 | 0.4839 | 0.6892 | 0.2239 |
| RMND1      | 0.5540 | 0.8903 | 0.6648 | 0.6477 | 0.6892 | 0.0713 |
| CCT2       | 0.5180 | 0.8843 | 0.8000 | 0.5546 | 0.6892 | 0.0903 |
| TACO1      | 0.5488 | 0.9410 | 0.6876 | 0.5796 | 0.6893 | 0.0890 |
| EXOSC2     | 0.4959 | 0.9314 | 0.7234 | 0.6076 | 0.6896 | 0.0930 |
| NME2       | 0.5791 | 0.8550 | 0.7078 | 0.6165 | 0.6896 | 0.0614 |
| FUS        | 0.5382 | 0.7568 | 0.7027 | 0.7616 | 0.6898 | 0.0523 |
| C13orf3    | 0.5997 | 0.6906 | 0.7934 | 0.6759 | 0.6899 | 0.0398 |
| RPS7       | 0.4134 | 0.9170 | 0.7960 | 0.6343 | 0.6902 | 0.1089 |
| GGA2       | 0.5484 | 0.9444 | 0.6795 | 0.5886 | 0.6902 | 0.0891 |
| FAF2       | 0.6399 | 0.8442 | 0.6687 | 0.6091 | 0.6905 | 0.0527 |
| RTN4R      | 0.5847 | 0.8256 | 0.6956 | 0.6563 | 0.6905 | 0.0505 |
| HNRNPD     | 0.4768 | 0.8515 | 0.7987 | 0.6366 | 0.6909 | 0.0847 |
| DUSP12     | 0.5582 | 0.9352 | 0.6379 | 0.6326 | 0.6910 | 0.0834 |
| C7orf47    | 0.5036 | 0.9802 | 0.7341 | 0.5469 | 0.6912 | 0.1086 |
| C19orf10   | 0.6761 | 0.9617 | 0.6212 | 0.5060 | 0.6912 | 0.0969 |
| IPO4       | 0.6874 | 0.7344 | 0.7055 | 0.6382 | 0.6914 | 0.0202 |
| PSMB10     | 0.5244 | 0.8861 | 0.7447 | 0.6113 | 0.6916 | 0.0791 |
| GNG5       | 0.6679 | 0.8076 | 0.7284 | 0.5645 | 0.6921 | 0.0513 |
| HEBP1      | 0.5627 | 0.8274 | 0.7358 | 0.6428 | 0.6922 | 0.0573 |
| MRI1       | 0.5509 | 0.7877 | 0.7274 | 0.7036 | 0.6924 | 0.0504 |
| SIP1       | 0.5607 | 0.8863 | 0.7009 | 0.6224 | 0.6926 | 0.0707 |
| SCARB1     | 0.5114 | 0.9971 | 0.6683 | 0.5938 | 0.6926 | 0.1064 |
| CASP2      | 0.5548 | 0.8434 | 0.6935 | 0.6797 | 0.6929 | 0.0591 |
| YIF1A      | 0.4702 | 1.0879 | 0.6687 | 0.5448 | 0.6929 | 0.1379 |
| DDEF2      | 0.6378 | 0.8838 | 0.6636 | 0.5866 | 0.6930 | 0.0656 |
| UBQLN4     | 0.4908 | 1.0297 | 0.7393 | 0.5122 | 0.6930 | 0.1255 |
| PTBP1      | 0.5778 | 0.8779 | 0.7169 | 0.6008 | 0.6933 | 0.0686 |
| GTF3C2     | 0.6103 | 0.7832 | 0.7423 | 0.6394 | 0.6938 | 0.0411 |
| ING3       | 0.5639 | 0.7645 | 0.7318 | 0.7157 | 0.6940 | 0.0445 |

|           |        |        |        |        |        |        |
|-----------|--------|--------|--------|--------|--------|--------|
| PTGES3    | 0.5354 | 0.7374 | 1.0278 | 0.4758 | 0.6941 | 0.1245 |
| TKT       | 0.5131 | 1.0304 | 0.7023 | 0.5310 | 0.6942 | 0.1199 |
| GOLGA7    | 0.6908 | 0.7940 | 0.7362 | 0.5571 | 0.6945 | 0.0504 |
| DERA      | 0.5601 | 0.8324 | 0.7905 | 0.5955 | 0.6946 | 0.0684 |
| NUP62     | 0.5284 | 0.9281 | 0.7511 | 0.5713 | 0.6947 | 0.0915 |
| C16orf59  | 0.5581 | 1.0155 | 0.6263 | 0.5792 | 0.6948 | 0.1079 |
| LOC728873 | 0.5504 | 0.9925 | 0.6588 | 0.5781 | 0.6950 | 0.1018 |
| LOC284023 | 0.6250 | 0.8485 | 0.6801 | 0.6265 | 0.6950 | 0.0527 |
| LOC90624  | 0.5884 | 0.8652 | 0.8161 | 0.5109 | 0.6952 | 0.0861 |
| C5orf33   | 0.6236 | 0.8086 | 0.7708 | 0.5778 | 0.6952 | 0.0559 |
| PARP2     | 0.5597 | 0.8538 | 0.7856 | 0.5819 | 0.6952 | 0.0733 |
| SDF2L1    | 0.5451 | 0.8428 | 0.6795 | 0.7139 | 0.6953 | 0.0612 |
| KAT2A     | 0.4994 | 1.0564 | 0.6485 | 0.5786 | 0.6957 | 0.1240 |
| PSMC3IP   | 0.5281 | 0.8639 | 0.6904 | 0.7019 | 0.6961 | 0.0686 |
| PGAM5     | 0.5434 | 0.9382 | 0.6782 | 0.6249 | 0.6962 | 0.0853 |
| LMBR1     | 0.5319 | 0.9123 | 0.7732 | 0.5675 | 0.6962 | 0.0895 |
| CCDC115   | 0.6498 | 0.8710 | 0.6960 | 0.5684 | 0.6963 | 0.0639 |
| GNL3L     | 0.4592 | 0.9088 | 0.8048 | 0.6125 | 0.6963 | 0.1001 |
| TRAP1     | 0.4488 | 1.0806 | 0.7167 | 0.5401 | 0.6966 | 0.1396 |
| FEZ2      | 0.5183 | 0.8898 | 0.7332 | 0.6450 | 0.6966 | 0.0781 |
| DDX46     | 0.5154 | 0.9665 | 0.7003 | 0.6046 | 0.6967 | 0.0975 |
| SDAD1     | 0.6158 | 0.8089 | 0.6522 | 0.7105 | 0.6969 | 0.0421 |
| NUP35     | 0.4774 | 0.9112 | 0.7513 | 0.6481 | 0.6970 | 0.0910 |
| NIPSNAP1  | 0.6173 | 0.8802 | 0.7206 | 0.5702 | 0.6970 | 0.0686 |
| ZDHHC9    | 0.5218 | 0.9204 | 0.7139 | 0.6324 | 0.6971 | 0.0842 |
| METTL3    | 0.5999 | 0.8996 | 0.6736 | 0.6161 | 0.6973 | 0.0693 |
| MSH6      | 0.5313 | 0.9191 | 0.7701 | 0.5694 | 0.6975 | 0.0906 |
| CLEC11A   | 0.6105 | 0.8524 | 0.6971 | 0.6300 | 0.6975 | 0.0548 |
| APEX2     | 0.5152 | 0.9137 | 0.6576 | 0.7037 | 0.6975 | 0.0825 |
| SLC11A2   | 0.5890 | 0.8640 | 0.6720 | 0.6664 | 0.6978 | 0.0585 |
| DDX21     | 0.5481 | 0.8301 | 0.7746 | 0.6387 | 0.6979 | 0.0641 |
| TLCD1     | 0.5216 | 0.8432 | 0.7609 | 0.6658 | 0.6979 | 0.0690 |
| GLOD4     | 0.5582 | 0.7925 | 0.8422 | 0.5990 | 0.6980 | 0.0702 |
| AGT       | 0.6598 | 0.7324 | 0.7579 | 0.6419 | 0.6980 | 0.0280 |
| HSPD1     | 0.5286 | 0.8515 | 0.8356 | 0.5765 | 0.6981 | 0.0846 |
| DUT       | 0.5359 | 0.8676 | 0.7331 | 0.6569 | 0.6984 | 0.0695 |
| SCAMP3    | 0.5565 | 0.8578 | 0.7652 | 0.6147 | 0.6985 | 0.0689 |
| LOC729708 | 0.5150 | 0.7529 | 0.9238 | 0.6025 | 0.6986 | 0.0897 |
| LOC646407 | 0.5840 | 0.9886 | 0.6703 | 0.5513 | 0.6986 | 0.0999 |
| CCNE1     | 0.4974 | 0.9251 | 0.7050 | 0.6670 | 0.6986 | 0.0880 |
| HSPC159   | 0.5721 | 0.7051 | 0.7898 | 0.7285 | 0.6989 | 0.0459 |
| C17orf96  | 0.5618 | 0.9231 | 0.5888 | 0.7219 | 0.6989 | 0.0825 |
| SMG5      | 0.5750 | 0.8174 | 0.8291 | 0.5748 | 0.6991 | 0.0717 |
| PPP1R14B  | 0.5531 | 0.9050 | 0.6907 | 0.6480 | 0.6992 | 0.0744 |
| VDAC3     | 0.5647 | 0.8434 | 0.7721 | 0.6167 | 0.6992 | 0.0652 |
| PRUNE2    | 0.5514 | 0.9865 | 0.5093 | 0.7498 | 0.6993 | 0.1092 |

|           |        |        |        |        |        |        |
|-----------|--------|--------|--------|--------|--------|--------|
| C1orf135  | 0.5040 | 0.8944 | 0.7130 | 0.6856 | 0.6993 | 0.0799 |
| C15orf42  | 0.5459 | 0.7212 | 0.7140 | 0.8159 | 0.6993 | 0.0561 |
| UBR7      | 0.6738 | 0.7988 | 0.7172 | 0.6075 | 0.6993 | 0.0401 |
| ERP29     | 0.6519 | 0.8946 | 0.6459 | 0.6054 | 0.6994 | 0.0659 |
| POP7      | 0.6409 | 0.8652 | 0.6628 | 0.6291 | 0.6995 | 0.0557 |
| THEM4     | 0.5520 | 0.8964 | 0.5964 | 0.7535 | 0.6996 | 0.0786 |
| SKIV2L2   | 0.4686 | 0.8954 | 0.8497 | 0.5862 | 0.7000 | 0.1029 |
| ORMDL1    | 0.6203 | 0.9122 | 0.7085 | 0.5591 | 0.7000 | 0.0771 |
| PRDX4     | 0.5265 | 0.9035 | 0.8386 | 0.5319 | 0.7001 | 0.0996 |
| DNAJC9    | 0.5313 | 0.9651 | 0.6769 | 0.6278 | 0.7003 | 0.0933 |
| RANGAP1   | 0.4696 | 0.9757 | 0.7361 | 0.6202 | 0.7004 | 0.1068 |
| C19orf40  | 0.5700 | 0.8919 | 0.6360 | 0.7047 | 0.7007 | 0.0694 |
| CTPS      | 0.4924 | 0.9842 | 0.6860 | 0.6403 | 0.7007 | 0.1031 |
| ATP5G1    | 0.4914 | 1.0103 | 0.7360 | 0.5655 | 0.7008 | 0.1152 |
| SSU72     | 0.5324 | 0.8633 | 0.7812 | 0.6267 | 0.7009 | 0.0746 |
| LPAR2     | 0.5512 | 0.8686 | 0.7493 | 0.6351 | 0.7011 | 0.0690 |
| GARS      | 0.5630 | 0.9329 | 0.6981 | 0.6111 | 0.7013 | 0.0821 |
| CSTF3     | 0.5671 | 0.8791 | 0.7253 | 0.6340 | 0.7014 | 0.0675 |
| GLRX3     | 0.5298 | 0.9108 | 0.7424 | 0.6227 | 0.7014 | 0.0822 |
| C8orf38   | 0.5672 | 0.8139 | 0.8421 | 0.5826 | 0.7014 | 0.0734 |
| SDCCAG3   | 0.5095 | 0.9530 | 0.6914 | 0.6524 | 0.7016 | 0.0925 |
| ACOT7     | 0.5617 | 0.8613 | 0.7523 | 0.6309 | 0.7016 | 0.0662 |
| LOC731007 | 0.6182 | 0.8871 | 0.7394 | 0.5617 | 0.7016 | 0.0721 |
| C9orf40   | 0.5777 | 0.7803 | 0.8562 | 0.5924 | 0.7017 | 0.0692 |
| TUBA1C    | 0.5344 | 0.9313 | 0.7725 | 0.5697 | 0.7020 | 0.0927 |
| SUMO2     | 0.6752 | 0.8436 | 0.6740 | 0.6160 | 0.7022 | 0.0491 |
| CDC23     | 0.6061 | 0.8214 | 0.7646 | 0.6172 | 0.7023 | 0.0537 |
| FRMD8     | 0.7145 | 0.7801 | 0.6280 | 0.6872 | 0.7024 | 0.0316 |
| PHACTR4   | 0.6786 | 0.8411 | 0.6289 | 0.6612 | 0.7025 | 0.0473 |
| ABCE1     | 0.5588 | 0.8406 | 0.8471 | 0.5643 | 0.7027 | 0.0815 |
| CBS       | 0.6474 | 0.9304 | 0.6382 | 0.5952 | 0.7028 | 0.0767 |
| HMGB1L1   | 0.5433 | 0.8258 | 0.7742 | 0.6686 | 0.7030 | 0.0625 |
| LOC652489 | 0.6541 | 0.9249 | 0.5993 | 0.6346 | 0.7032 | 0.0748 |
| LOC652864 | 0.5577 | 0.8512 | 0.7648 | 0.6417 | 0.7039 | 0.0649 |
| MRPL18    | 0.5567 | 0.9298 | 0.6875 | 0.6415 | 0.7039 | 0.0800 |
| SFRS2     | 0.5423 | 0.8995 | 0.7733 | 0.6006 | 0.7039 | 0.0816 |
| HAT1      | 0.5292 | 0.7767 | 0.9210 | 0.5891 | 0.7040 | 0.0895 |
| UCKL1     | 0.6258 | 0.9311 | 0.6403 | 0.6210 | 0.7045 | 0.0756 |
| C1orf131  | 0.5416 | 0.8278 | 0.7838 | 0.6655 | 0.7046 | 0.0643 |
| VPS4B     | 0.6152 | 1.0217 | 0.6398 | 0.5419 | 0.7047 | 0.1077 |
| PDHA1     | 0.6103 | 0.8650 | 0.8782 | 0.4652 | 0.7047 | 0.1009 |
| PSMD2     | 0.4842 | 1.0549 | 0.7459 | 0.5338 | 0.7047 | 0.1298 |
| C18orf45  | 0.4530 | 1.0435 | 0.7183 | 0.6050 | 0.7050 | 0.1253 |
| FAM20B    | 0.6197 | 0.9718 | 0.6621 | 0.5663 | 0.7050 | 0.0911 |
| DDX41     | 0.6145 | 0.8702 | 0.7049 | 0.6304 | 0.7050 | 0.0585 |
| DPM2      | 0.6149 | 0.8952 | 0.6893 | 0.6208 | 0.7050 | 0.0656 |

|            |        |        |        |        |        |        |
|------------|--------|--------|--------|--------|--------|--------|
| HIATL1     | 0.5614 | 0.9607 | 0.6318 | 0.6662 | 0.7050 | 0.0880 |
| RBM3       | 0.5693 | 0.9706 | 0.7008 | 0.5800 | 0.7052 | 0.0934 |
| CCNF       | 0.6161 | 0.9155 | 0.7091 | 0.5800 | 0.7052 | 0.0752 |
| ALDH1B1    | 0.4941 | 0.8769 | 0.8360 | 0.6146 | 0.7054 | 0.0910 |
| ACER3      | 0.5885 | 0.9210 | 0.7370 | 0.5754 | 0.7055 | 0.0806 |
| NUP188     | 0.6058 | 0.9049 | 0.6960 | 0.6162 | 0.7057 | 0.0694 |
| DFFB       | 0.5374 | 0.8858 | 0.7731 | 0.6272 | 0.7059 | 0.0772 |
| TSEN54     | 0.5753 | 0.8259 | 0.7255 | 0.6974 | 0.7060 | 0.0516 |
| STRA13     | 0.5022 | 0.9743 | 0.7691 | 0.5788 | 0.7061 | 0.1055 |
| DUSP23     | 0.5451 | 0.9506 | 0.8258 | 0.5030 | 0.7061 | 0.1085 |
| XPNPEP1    | 0.6212 | 0.8360 | 0.7334 | 0.6341 | 0.7062 | 0.0500 |
| MRPS12     | 0.5472 | 0.8383 | 0.8097 | 0.6306 | 0.7064 | 0.0702 |
| LOC653972  | 0.5544 | 0.9519 | 0.7403 | 0.5795 | 0.7065 | 0.0916 |
| WSB2       | 0.5464 | 0.8466 | 0.8788 | 0.5550 | 0.7067 | 0.0903 |
| FEM1A      | 0.5369 | 0.9682 | 0.7281 | 0.5961 | 0.7073 | 0.0957 |
| CISD2      | 0.5542 | 0.8982 | 0.7807 | 0.5964 | 0.7074 | 0.0804 |
| RFWD3      | 0.4645 | 0.9771 | 0.6875 | 0.7005 | 0.7074 | 0.1049 |
| IPO5       | 0.5486 | 0.9709 | 0.6575 | 0.6529 | 0.7075 | 0.0913 |
| NFE2L2     | 0.5128 | 0.8752 | 0.8342 | 0.6109 | 0.7083 | 0.0873 |
| ATP6V0C    | 0.5770 | 0.9649 | 0.7130 | 0.5786 | 0.7084 | 0.0912 |
| LOC1001279 | 0.6040 | 0.8365 | 0.7681 | 0.6252 | 0.7084 | 0.0561 |
| INO80E     | 0.5901 | 0.9059 | 0.6745 | 0.6637 | 0.7085 | 0.0684 |
| STIP1      | 0.5421 | 1.0073 | 0.7142 | 0.5712 | 0.7087 | 0.1064 |
| LOC1001282 | 0.5057 | 0.9819 | 0.7485 | 0.5995 | 0.7089 | 0.1038 |
| SLCO4A1    | 0.5149 | 0.9220 | 0.6719 | 0.7271 | 0.7090 | 0.0840 |
| CABLES1    | 0.5892 | 0.9000 | 0.6850 | 0.6621 | 0.7091 | 0.0668 |
| RTKN       | 0.5891 | 0.8995 | 0.7063 | 0.6420 | 0.7092 | 0.0678 |
| RBM14      | 0.5956 | 0.9498 | 0.7346 | 0.5568 | 0.7092 | 0.0888 |
| SUPV3L1    | 0.6414 | 0.8735 | 0.6680 | 0.6543 | 0.7093 | 0.0550 |
| C12orf52   | 0.5148 | 0.8945 | 0.7345 | 0.6941 | 0.7095 | 0.0780 |
| RQCD1      | 0.4860 | 0.8939 | 0.7616 | 0.6968 | 0.7096 | 0.0851 |
| HMBS       | 0.5744 | 1.0509 | 0.6349 | 0.5785 | 0.7097 | 0.1146 |
| CYB5B      | 0.5189 | 0.8513 | 0.8140 | 0.6549 | 0.7098 | 0.0766 |
| LOC728556  | 0.4919 | 1.0739 | 0.7387 | 0.5356 | 0.7100 | 0.1327 |
| FLJ39827   | 0.6132 | 0.8704 | 0.7311 | 0.6255 | 0.7100 | 0.0596 |
| NUP62CL    | 0.6523 | 0.7801 | 0.7510 | 0.6573 | 0.7102 | 0.0325 |
| CECR5      | 0.4967 | 1.0904 | 0.7488 | 0.5052 | 0.7103 | 0.1395 |
| NUP155     | 0.5457 | 0.8272 | 0.8297 | 0.6386 | 0.7103 | 0.0708 |
| SHPK       | 0.6631 | 0.9068 | 0.6732 | 0.5984 | 0.7104 | 0.0675 |
| POLD2      | 0.5380 | 0.9486 | 0.7132 | 0.6426 | 0.7106 | 0.0871 |
| GPR172A    | 0.6467 | 0.8906 | 0.6685 | 0.6366 | 0.7106 | 0.0604 |
| RHEB       | 0.4996 | 1.0896 | 0.6828 | 0.5709 | 0.7107 | 0.1318 |
| STAMBPL1   | 0.5935 | 0.8470 | 0.7819 | 0.6209 | 0.7108 | 0.0615 |
| C7orf27    | 0.5324 | 0.9180 | 0.7698 | 0.6230 | 0.7108 | 0.0846 |
| PBX3       | 0.6413 | 0.8168 | 0.7184 | 0.6670 | 0.7109 | 0.0388 |
| C14orf173  | 0.6623 | 0.8460 | 0.6400 | 0.6953 | 0.7109 | 0.0464 |

|            |        |        |        |        |        |        |
|------------|--------|--------|--------|--------|--------|--------|
| SMNDC1     | 0.5228 | 0.8621 | 0.8591 | 0.6003 | 0.7111 | 0.0878 |
| CBR3       | 0.6509 | 0.8536 | 0.6821 | 0.6580 | 0.7111 | 0.0480 |
| PPIL1      | 0.5159 | 0.9605 | 0.7069 | 0.6618 | 0.7113 | 0.0925 |
| RPF1       | 0.6081 | 0.8638 | 0.8769 | 0.4969 | 0.7114 | 0.0946 |
| COPS7A     | 0.5947 | 0.9956 | 0.7128 | 0.5433 | 0.7116 | 0.1011 |
| USE1       | 0.6418 | 0.9434 | 0.7078 | 0.5543 | 0.7118 | 0.0833 |
| SEC22C     | 0.6329 | 0.9659 | 0.6687 | 0.5806 | 0.7120 | 0.0865 |
| YWHAG      | 0.6048 | 0.7763 | 0.9928 | 0.4745 | 0.7121 | 0.1122 |
| KIF21A     | 0.5708 | 0.8672 | 0.7524 | 0.6586 | 0.7122 | 0.0636 |
| LCMT2      | 0.5055 | 1.0618 | 0.6818 | 0.6003 | 0.7124 | 0.1219 |
| KIAA0672   | 0.5606 | 0.9101 | 0.7149 | 0.6646 | 0.7125 | 0.0733 |
| NDUFB10    | 0.6142 | 0.8061 | 0.8523 | 0.5777 | 0.7126 | 0.0684 |
| C15orf39   | 0.6221 | 0.9809 | 0.7180 | 0.5294 | 0.7126 | 0.0974 |
| VKORC1     | 0.6016 | 0.8620 | 0.7060 | 0.6822 | 0.7130 | 0.0545 |
| DLST       | 0.5839 | 0.9087 | 0.7603 | 0.5995 | 0.7131 | 0.0764 |
| C19orf24   | 0.5174 | 1.0087 | 0.7856 | 0.5407 | 0.7131 | 0.1157 |
| PFAS       | 0.5900 | 0.7978 | 0.8300 | 0.6348 | 0.7131 | 0.0592 |
| FNTB       | 0.6724 | 0.8368 | 0.7160 | 0.6276 | 0.7132 | 0.0450 |
| SFRS7      | 0.5900 | 0.8462 | 0.8344 | 0.5829 | 0.7134 | 0.0733 |
| TMEM185B   | 0.6513 | 0.9211 | 0.6543 | 0.6275 | 0.7135 | 0.0694 |
| LOC647150  | 0.5122 | 0.9116 | 0.8552 | 0.5751 | 0.7135 | 0.0996 |
| GPC4       | 0.6445 | 0.8805 | 0.6814 | 0.6477 | 0.7135 | 0.0563 |
| LOC644422  | 0.4825 | 0.8990 | 0.7688 | 0.7043 | 0.7136 | 0.0870 |
| ZNF296     | 0.6018 | 0.8282 | 0.7802 | 0.6444 | 0.7137 | 0.0539 |
| C2orf43    | 0.7151 | 0.8477 | 0.7221 | 0.5700 | 0.7137 | 0.0568 |
| TIMM44     | 0.5127 | 0.9836 | 0.7016 | 0.6576 | 0.7139 | 0.0985 |
| E2F3       | 0.5037 | 0.8559 | 0.8979 | 0.5981 | 0.7139 | 0.0964 |
| DUSP2      | 0.6187 | 0.7602 | 0.7747 | 0.7022 | 0.7139 | 0.0354 |
| LMAN1      | 0.4316 | 0.9928 | 0.8025 | 0.6288 | 0.7140 | 0.1199 |
| LOC1001305 | 0.5331 | 0.9305 | 0.8289 | 0.5636 | 0.7140 | 0.0981 |
| ROD1       | 0.5955 | 0.8798 | 0.7514 | 0.6300 | 0.7142 | 0.0645 |
| CPOX       | 0.6720 | 0.8169 | 0.6983 | 0.6697 | 0.7142 | 0.0348 |
| LOC729887  | 0.5931 | 0.9375 | 0.7489 | 0.5775 | 0.7142 | 0.0839 |
| FH         | 0.6128 | 0.7870 | 0.8658 | 0.5914 | 0.7142 | 0.0669 |
| METTL1     | 0.5707 | 0.8821 | 0.7610 | 0.6434 | 0.7143 | 0.0683 |
| C13orf27   | 0.5871 | 0.8011 | 0.8758 | 0.5935 | 0.7144 | 0.0733 |
| TMEM199    | 0.6937 | 0.8036 | 0.8095 | 0.5509 | 0.7144 | 0.0607 |
| LOC729406  | 0.5617 | 0.9743 | 0.7594 | 0.5626 | 0.7145 | 0.0983 |
| ARL1       | 0.5976 | 0.9001 | 0.7405 | 0.6205 | 0.7147 | 0.0693 |
| POLR3G     | 0.5151 | 0.8929 | 0.7577 | 0.6935 | 0.7148 | 0.0785 |
| LIAS       | 0.5983 | 0.8741 | 0.8125 | 0.5746 | 0.7149 | 0.0754 |
| SSBP1      | 0.5613 | 0.7887 | 0.8695 | 0.6403 | 0.7149 | 0.0698 |
| CPSF6      | 0.5830 | 0.8338 | 0.8012 | 0.6430 | 0.7152 | 0.0607 |
| NPM3       | 0.5466 | 0.9653 | 0.7425 | 0.6067 | 0.7153 | 0.0929 |
| CEP78      | 0.5462 | 0.8327 | 0.7876 | 0.6955 | 0.7155 | 0.0633 |
| CCRN4L     | 0.5313 | 0.7850 | 0.8373 | 0.7086 | 0.7156 | 0.0668 |



|            |        |        |        |        |        |        |
|------------|--------|--------|--------|--------|--------|--------|
| FZD2       | 0.6526 | 0.9086 | 0.6201 | 0.6814 | 0.7157 | 0.0655 |
| MAPK6      | 0.6892 | 0.7194 | 0.8038 | 0.6506 | 0.7157 | 0.0326 |
| SPCS3      | 0.5717 | 0.8657 | 0.7994 | 0.6265 | 0.7158 | 0.0696 |
| GRWD1      | 0.5281 | 0.9326 | 0.6931 | 0.7099 | 0.7159 | 0.0831 |
| LOC729102  | 0.4875 | 1.0280 | 0.7247 | 0.6235 | 0.7159 | 0.1148 |
| ERI3       | 0.6408 | 0.7579 | 0.8306 | 0.6351 | 0.7161 | 0.0475 |
| TUBA1A     | 0.5867 | 0.8682 | 0.8177 | 0.5920 | 0.7162 | 0.0739 |
| C7orf28B   | 0.5328 | 0.8705 | 0.8533 | 0.6086 | 0.7163 | 0.0856 |
| TXNL2      | 0.5071 | 0.9167 | 0.7820 | 0.6596 | 0.7163 | 0.0873 |
| MRPL35     | 0.5510 | 0.8745 | 0.8152 | 0.6250 | 0.7164 | 0.0766 |
| LOC730107  | 0.5431 | 0.8603 | 0.8775 | 0.5854 | 0.7166 | 0.0884 |
| HDHD1A     | 0.5224 | 0.9784 | 0.7662 | 0.5993 | 0.7166 | 0.1010 |
| POLR1E     | 0.5026 | 0.9114 | 0.8621 | 0.5903 | 0.7166 | 0.1004 |
| ZBTB9      | 0.5694 | 0.9786 | 0.6953 | 0.6237 | 0.7167 | 0.0910 |
| CABC1      | 0.6306 | 0.9243 | 0.7147 | 0.5981 | 0.7169 | 0.0734 |
| NDUFAB1    | 0.6050 | 0.7479 | 0.9332 | 0.5818 | 0.7170 | 0.0809 |
| INCENP     | 0.5508 | 0.8681 | 0.7292 | 0.7203 | 0.7171 | 0.0649 |
| UGT2B11    | 0.5173 | 1.0116 | 0.8267 | 0.5132 | 0.7172 | 0.1226 |
| C1orf109   | 0.5547 | 0.9556 | 0.7057 | 0.6529 | 0.7172 | 0.0854 |
| MRPS26     | 0.5883 | 0.9174 | 0.7641 | 0.5995 | 0.7173 | 0.0779 |
| EMG1       | 0.5153 | 1.0166 | 0.7196 | 0.6183 | 0.7174 | 0.1081 |
| MRPL37     | 0.5826 | 0.9966 | 0.7125 | 0.5798 | 0.7179 | 0.0979 |
| FAM65A     | 0.6253 | 0.9378 | 0.6490 | 0.6597 | 0.7179 | 0.0736 |
| WDR4       | 0.5351 | 0.8972 | 0.6748 | 0.7652 | 0.7181 | 0.0762 |
| GLDC       | 0.6091 | 0.9610 | 0.6760 | 0.6270 | 0.7183 | 0.0821 |
| NHP2       | 0.5345 | 0.9793 | 0.7712 | 0.5890 | 0.7185 | 0.1006 |
| CLN3       | 0.5927 | 0.9150 | 0.6360 | 0.7307 | 0.7186 | 0.0715 |
| C8orf55    | 0.5779 | 0.9032 | 0.6654 | 0.7280 | 0.7186 | 0.0688 |
| IARS2      | 0.6753 | 0.9069 | 0.7163 | 0.5765 | 0.7187 | 0.0692 |
| PPAT       | 0.4952 | 1.0317 | 0.6994 | 0.6489 | 0.7188 | 0.1130 |
| EIF5A      | 0.6158 | 0.8822 | 0.7595 | 0.6178 | 0.7188 | 0.0640 |
| GPATCH4    | 0.5866 | 0.9932 | 0.6947 | 0.6014 | 0.7190 | 0.0945 |
| VDAC1      | 0.5618 | 0.9078 | 0.8014 | 0.6052 | 0.7190 | 0.0817 |
| PRMT5      | 0.5668 | 0.9459 | 0.7716 | 0.5925 | 0.7192 | 0.0882 |
| PRELID1    | 0.5427 | 1.0038 | 0.7663 | 0.5640 | 0.7192 | 0.1074 |
| PSPH       | 0.7165 | 0.8798 | 0.6562 | 0.6258 | 0.7196 | 0.0566 |
| SLC25A13   | 0.5408 | 0.8770 | 0.8247 | 0.6364 | 0.7198 | 0.0789 |
| NHP2L1     | 0.4974 | 0.9877 | 0.7860 | 0.6081 | 0.7198 | 0.1073 |
| LOC1001292 | 0.4686 | 0.9153 | 0.8602 | 0.6353 | 0.7198 | 0.1033 |
| SRP72      | 0.5966 | 0.8904 | 0.8495 | 0.5429 | 0.7199 | 0.0878 |
| PHF13      | 0.6550 | 0.9702 | 0.6500 | 0.6043 | 0.7199 | 0.0842 |
| NUP160     | 0.5559 | 1.0232 | 0.7162 | 0.5843 | 0.7199 | 0.1070 |
| EXT2       | 0.6845 | 0.8491 | 0.7109 | 0.6351 | 0.7199 | 0.0458 |
| PSMD14     | 0.5873 | 0.8117 | 0.9599 | 0.5207 | 0.7199 | 0.1014 |
| EME1       | 0.6076 | 0.8988 | 0.7324 | 0.6409 | 0.7199 | 0.0652 |
| DNAJC11    | 0.6527 | 0.8214 | 0.6930 | 0.7129 | 0.7200 | 0.0360 |

|            |        |        |        |        |        |        |
|------------|--------|--------|--------|--------|--------|--------|
| DIAPH3     | 0.6204 | 0.8363 | 0.7408 | 0.6833 | 0.7202 | 0.0459 |
| C14orf109  | 0.5732 | 0.9078 | 0.7335 | 0.6662 | 0.7202 | 0.0706 |
| CD320      | 0.5640 | 0.9490 | 0.7790 | 0.5899 | 0.7205 | 0.0900 |
| NUP153     | 0.6519 | 0.8469 | 0.7691 | 0.6149 | 0.7207 | 0.0534 |
| SLC29A4    | 0.6325 | 0.8448 | 0.7545 | 0.6509 | 0.7207 | 0.0493 |
| ZNF593     | 0.5447 | 1.0059 | 0.7062 | 0.6261 | 0.7208 | 0.1006 |
| CKAP5      | 0.5659 | 1.0007 | 0.6976 | 0.6189 | 0.7208 | 0.0972 |
| RC3H2      | 0.5675 | 0.9359 | 0.7678 | 0.6123 | 0.7209 | 0.0835 |
| PTMA       | 0.5830 | 0.7336 | 0.9233 | 0.6440 | 0.7210 | 0.0742 |
| LAS1L      | 0.5933 | 0.9388 | 0.6968 | 0.6558 | 0.7212 | 0.0756 |
| SH2D4A     | 0.6168 | 0.8653 | 0.7273 | 0.6757 | 0.7213 | 0.0531 |
| LOC1001281 | 0.5613 | 0.8861 | 0.7599 | 0.6779 | 0.7213 | 0.0684 |
| RABEPK     | 0.5450 | 1.0208 | 0.7749 | 0.5454 | 0.7215 | 0.1135 |
| FAM108C1   | 0.5610 | 0.8345 | 0.8186 | 0.6729 | 0.7218 | 0.0648 |
| TMX1       | 0.6194 | 0.8854 | 0.7761 | 0.6064 | 0.7218 | 0.0668 |
| VHL        | 0.5877 | 1.0123 | 0.6475 | 0.6399 | 0.7219 | 0.0977 |
| SSB        | 0.5414 | 0.9044 | 0.8186 | 0.6234 | 0.7220 | 0.0841 |
| ERCC6L     | 0.6007 | 0.7950 | 0.8059 | 0.6867 | 0.7221 | 0.0486 |
| MRT04      | 0.5964 | 0.7750 | 0.8598 | 0.6571 | 0.7221 | 0.0590 |
| PGD        | 0.5286 | 1.0277 | 0.7001 | 0.6332 | 0.7224 | 0.1077 |
| SLC29A1    | 0.5649 | 0.8374 | 0.7360 | 0.7514 | 0.7224 | 0.0571 |
| LOC389599  | 0.6685 | 0.8241 | 0.8673 | 0.5301 | 0.7225 | 0.0770 |
| SEC61A2    | 0.5583 | 0.8731 | 0.7315 | 0.7274 | 0.7226 | 0.0644 |
| ARMC10     | 0.5754 | 0.9276 | 0.7584 | 0.6293 | 0.7227 | 0.0784 |
| MTMR4      | 0.5817 | 0.9539 | 0.7750 | 0.5802 | 0.7227 | 0.0896 |
| WDR18      | 0.4876 | 0.9991 | 0.7088 | 0.6953 | 0.7227 | 0.1051 |
| DEK        | 0.6334 | 0.9842 | 0.7403 | 0.5332 | 0.7227 | 0.0969 |
| LOC730246  | 0.5534 | 0.9297 | 0.7910 | 0.6172 | 0.7228 | 0.0853 |
| MAT2A      | 0.5976 | 1.0191 | 0.6414 | 0.6333 | 0.7228 | 0.0992 |
| LOC647340  | 0.5395 | 1.0180 | 0.7309 | 0.6030 | 0.7229 | 0.1061 |
| NELF       | 0.5230 | 0.9745 | 0.8049 | 0.5897 | 0.7230 | 0.1032 |
| Magmas     | 0.5798 | 0.7735 | 0.8476 | 0.6915 | 0.7231 | 0.0574 |
| TUBA4A     | 0.6815 | 0.8652 | 0.7665 | 0.5793 | 0.7231 | 0.0609 |
| ILF2       | 0.5574 | 0.9535 | 0.7344 | 0.6474 | 0.7232 | 0.0849 |
| TMEM70     | 0.5407 | 0.8554 | 0.8073 | 0.6894 | 0.7232 | 0.0701 |
| LRP11      | 0.5835 | 0.8277 | 0.8893 | 0.5928 | 0.7233 | 0.0791 |
| CDR2L      | 0.6085 | 1.0224 | 0.7007 | 0.5623 | 0.7235 | 0.1037 |
| C1orf52    | 0.6474 | 0.8900 | 0.7981 | 0.5585 | 0.7235 | 0.0743 |
| ARD1A      | 0.5305 | 0.8925 | 0.9015 | 0.5699 | 0.7236 | 0.1004 |
| RNASEH1    | 0.5225 | 1.0070 | 0.7286 | 0.6363 | 0.7236 | 0.1034 |
| DLEU1      | 0.5244 | 0.9931 | 0.7976 | 0.5809 | 0.7240 | 0.1073 |
| CIRH1A     | 0.4785 | 0.9300 | 0.7845 | 0.7035 | 0.7241 | 0.0943 |
| DLL3       | 0.6343 | 0.8360 | 0.7335 | 0.6929 | 0.7242 | 0.0425 |
| ATP6V0A2   | 0.7154 | 0.9243 | 0.6428 | 0.6143 | 0.7242 | 0.0700 |
| SNORA61    | 0.5337 | 0.9718 | 0.6882 | 0.7032 | 0.7242 | 0.0910 |
| DARS2      | 0.5911 | 0.9253 | 0.7898 | 0.5911 | 0.7243 | 0.0817 |

|            |        |        |        |        |        |        |
|------------|--------|--------|--------|--------|--------|--------|
| GPR180     | 0.6066 | 0.9383 | 0.7161 | 0.6366 | 0.7244 | 0.0749 |
| FNBP4      | 0.5995 | 0.9132 | 0.6868 | 0.6983 | 0.7244 | 0.0667 |
| DNASE2B    | 0.4954 | 0.9580 | 0.8167 | 0.6284 | 0.7246 | 0.1020 |
| SLC25A28   | 0.5281 | 1.0106 | 0.7256 | 0.6345 | 0.7247 | 0.1035 |
| CHCHD3     | 0.5783 | 0.9047 | 0.8258 | 0.5901 | 0.7247 | 0.0828 |
| OSGEPL1    | 0.6293 | 0.7469 | 0.8367 | 0.6861 | 0.7248 | 0.0444 |
| HNRPM      | 0.5588 | 1.0712 | 0.7097 | 0.5594 | 0.7248 | 0.1208 |
| JTB        | 0.5985 | 1.0008 | 0.7367 | 0.5634 | 0.7248 | 0.0993 |
| RBBP8      | 0.5355 | 0.8913 | 0.8662 | 0.6065 | 0.7249 | 0.0902 |
| RUVBL2     | 0.5924 | 1.0081 | 0.7588 | 0.5406 | 0.7250 | 0.1052 |
| ECSIT      | 0.6370 | 0.9062 | 0.7178 | 0.6394 | 0.7251 | 0.0632 |
| C6orf192   | 0.6357 | 0.9612 | 0.7423 | 0.5612 | 0.7251 | 0.0870 |
| UFSP1      | 0.5778 | 0.8713 | 0.7848 | 0.6668 | 0.7252 | 0.0646 |
| PITX1      | 0.5994 | 0.8855 | 0.8004 | 0.6159 | 0.7253 | 0.0702 |
| LOC644214  | 0.5397 | 0.8193 | 0.9853 | 0.5570 | 0.7253 | 0.1077 |
| PATE3      | 0.5206 | 0.8596 | 0.8784 | 0.6434 | 0.7255 | 0.0866 |
| CYP4V2     | 0.7465 | 0.8092 | 0.6881 | 0.6585 | 0.7256 | 0.0334 |
| TROVE2     | 0.5703 | 0.9906 | 0.7507 | 0.5908 | 0.7256 | 0.0971 |
| ICK        | 0.5713 | 0.8929 | 0.7693 | 0.6697 | 0.7258 | 0.0688 |
| DDT        | 0.6028 | 0.9226 | 0.7732 | 0.6048 | 0.7258 | 0.0768 |
| DNASE2     | 0.5395 | 0.9262 | 0.8072 | 0.6309 | 0.7260 | 0.0869 |
| C1orf71    | 0.4928 | 1.0357 | 0.7779 | 0.5986 | 0.7263 | 0.1188 |
| STARD3NL   | 0.5161 | 1.0124 | 0.7893 | 0.5875 | 0.7263 | 0.1115 |
| TFB2M      | 0.5236 | 0.9136 | 0.8561 | 0.6120 | 0.7264 | 0.0940 |
| EIF3J      | 0.5412 | 0.9335 | 0.7958 | 0.6352 | 0.7264 | 0.0868 |
| C7orf30    | 0.5720 | 0.8897 | 0.7456 | 0.6986 | 0.7265 | 0.0656 |
| FN3KRP     | 0.6710 | 0.9206 | 0.7217 | 0.5929 | 0.7266 | 0.0699 |
| SNX5       | 0.5212 | 1.0792 | 0.6219 | 0.6841 | 0.7266 | 0.1222 |
| HES4       | 0.6377 | 0.9853 | 0.6754 | 0.6082 | 0.7266 | 0.0873 |
| LETM1      | 0.7330 | 0.8710 | 0.7038 | 0.5990 | 0.7267 | 0.0560 |
| ZYX        | 0.5873 | 0.9692 | 0.7001 | 0.6506 | 0.7268 | 0.0840 |
| SLC27A5    | 0.5121 | 1.0143 | 0.7633 | 0.6176 | 0.7268 | 0.1088 |
| ZCCHC8     | 0.6633 | 0.9559 | 0.6455 | 0.6433 | 0.7270 | 0.0764 |
| FAH        | 0.5502 | 0.9858 | 0.7746 | 0.5974 | 0.7270 | 0.0989 |
| C2orf29    | 0.5896 | 0.9093 | 0.7784 | 0.6308 | 0.7270 | 0.0730 |
| LOC1001345 | 0.4977 | 1.0142 | 0.8096 | 0.5868 | 0.7271 | 0.1160 |
| CCDC51     | 0.5064 | 1.0808 | 0.7176 | 0.6041 | 0.7272 | 0.1255 |
| TMEM138    | 0.5377 | 0.9570 | 0.7778 | 0.6371 | 0.7274 | 0.0910 |
| FAHD1      | 0.5400 | 0.8770 | 0.8975 | 0.5953 | 0.7274 | 0.0930 |
| CLASP2     | 0.6080 | 0.9685 | 0.6764 | 0.6569 | 0.7275 | 0.0816 |
| WDHD1      | 0.6107 | 0.8106 | 0.7876 | 0.7010 | 0.7275 | 0.0455 |
| LOC646791  | 0.5426 | 1.0453 | 0.7252 | 0.5972 | 0.7276 | 0.1126 |
| C10orf2    | 0.5510 | 0.8806 | 0.7997 | 0.6797 | 0.7277 | 0.0719 |
| RBBP9      | 0.5267 | 0.9509 | 0.8200 | 0.6133 | 0.7277 | 0.0965 |
| TMEM177    | 0.5790 | 0.9917 | 0.7553 | 0.5853 | 0.7278 | 0.0970 |
| GSTT2B     | 0.6426 | 0.9591 | 0.6442 | 0.6661 | 0.7280 | 0.0772 |

|           |        |        |        |        |        |        |
|-----------|--------|--------|--------|--------|--------|--------|
| BUB1B     | 0.5999 | 0.7896 | 0.7414 | 0.7817 | 0.7282 | 0.0440 |
| BARD1     | 0.5557 | 0.9386 | 0.6885 | 0.7300 | 0.7282 | 0.0794 |
| TMEM144   | 0.4916 | 0.9084 | 0.9665 | 0.5466 | 0.7283 | 0.1219 |
| GLMN      | 0.5604 | 0.9517 | 0.8539 | 0.5470 | 0.7283 | 0.1028 |
| C4orf18   | 0.5513 | 0.9783 | 0.7937 | 0.5901 | 0.7284 | 0.0988 |
| MRPS28    | 0.6530 | 0.8755 | 0.9255 | 0.4597 | 0.7285 | 0.1074 |
| LOC728564 | 0.4879 | 0.8493 | 0.9239 | 0.6527 | 0.7285 | 0.0985 |
| PWP1      | 0.5918 | 0.9726 | 0.7667 | 0.5828 | 0.7285 | 0.0917 |
| ZNF598    | 0.6245 | 0.9859 | 0.7085 | 0.5953 | 0.7285 | 0.0891 |
| RBBP7     | 0.5448 | 0.8114 | 1.0287 | 0.5292 | 0.7285 | 0.1192 |
| DUS3L     | 0.5230 | 1.0158 | 0.6786 | 0.6970 | 0.7286 | 0.1034 |
| VTA1      | 0.5193 | 1.0919 | 0.7098 | 0.5936 | 0.7287 | 0.1273 |
| GUF1      | 0.5942 | 0.9958 | 0.6939 | 0.6313 | 0.7288 | 0.0914 |
| OSGEP     | 0.5995 | 0.9291 | 0.7750 | 0.6117 | 0.7288 | 0.0778 |
| GMPS      | 0.4186 | 1.1257 | 0.7462 | 0.6249 | 0.7288 | 0.1486 |
| EFNA4     | 0.6034 | 0.9308 | 0.6815 | 0.7005 | 0.7290 | 0.0704 |
| YDJC      | 0.6157 | 0.8365 | 0.8917 | 0.5726 | 0.7291 | 0.0792 |
| CUEDC2    | 0.7110 | 0.8754 | 0.6739 | 0.6564 | 0.7292 | 0.0501 |
| CLDN7     | 0.5717 | 0.9575 | 0.8181 | 0.5702 | 0.7294 | 0.0958 |
| C19orf50  | 0.5915 | 0.8292 | 0.8878 | 0.6092 | 0.7294 | 0.0756 |
| FARSA     | 0.6238 | 0.8225 | 0.7465 | 0.7256 | 0.7296 | 0.0410 |
| MSL3L1    | 0.5630 | 0.9148 | 0.8223 | 0.6196 | 0.7299 | 0.0830 |
| MYCBP2    | 0.6521 | 0.9039 | 0.7349 | 0.6303 | 0.7303 | 0.0621 |
| MTDH      | 0.5864 | 0.8624 | 0.9929 | 0.4798 | 0.7304 | 0.1190 |
| CBR4      | 0.6727 | 0.8791 | 0.6958 | 0.6742 | 0.7304 | 0.0498 |
| SNRPD3    | 0.5652 | 0.8166 | 0.8031 | 0.7369 | 0.7305 | 0.0578 |
| COQ9      | 0.5750 | 0.8709 | 0.7598 | 0.7164 | 0.7305 | 0.0612 |
| SCO2      | 0.5337 | 0.9893 | 0.7932 | 0.6066 | 0.7307 | 0.1021 |
| ELL3      | 0.5640 | 0.9832 | 0.7322 | 0.6437 | 0.7308 | 0.0909 |
| STARD7    | 0.5706 | 0.9668 | 0.7865 | 0.5995 | 0.7309 | 0.0921 |
| PTDSS1    | 0.4514 | 1.2532 | 0.6592 | 0.5608 | 0.7311 | 0.1791 |
| SLC25A39  | 0.5692 | 1.0621 | 0.7157 | 0.5789 | 0.7315 | 0.1152 |
| GART      | 0.6048 | 0.9326 | 0.7416 | 0.6477 | 0.7317 | 0.0728 |
| RPL12P6   | 0.3941 | 0.8908 | 0.9901 | 0.6518 | 0.7317 | 0.1331 |
| LARP1     | 0.6398 | 0.9224 | 0.6576 | 0.7070 | 0.7317 | 0.0651 |
| SNAP23    | 0.5388 | 0.9265 | 0.7698 | 0.6920 | 0.7318 | 0.0807 |
| SNRNP25   | 0.5953 | 1.0207 | 0.7570 | 0.5552 | 0.7320 | 0.1056 |
| NPTN      | 0.6225 | 0.8254 | 0.7875 | 0.6928 | 0.7321 | 0.0459 |
| RNU6-15   | 0.5284 | 1.0153 | 0.8587 | 0.5259 | 0.7321 | 0.1225 |
| CDK4      | 0.4660 | 1.1609 | 0.7352 | 0.5664 | 0.7321 | 0.1533 |
| TXNDC12   | 0.5843 | 0.9135 | 0.7364 | 0.6947 | 0.7322 | 0.0684 |
| ORC5L     | 0.5869 | 0.9349 | 0.8062 | 0.6017 | 0.7324 | 0.0840 |
| C9orf30   | 0.6743 | 0.7853 | 0.8628 | 0.6083 | 0.7327 | 0.0567 |
| C14orf32  | 0.6031 | 0.8948 | 0.8444 | 0.5893 | 0.7329 | 0.0796 |
| STOML2    | 0.5699 | 0.9265 | 0.7748 | 0.6608 | 0.7330 | 0.0769 |
| CEBPG     | 0.7808 | 0.8133 | 0.7388 | 0.5993 | 0.7330 | 0.0471 |

|            |        |        |        |        |        |        |
|------------|--------|--------|--------|--------|--------|--------|
| HIST2H3C   | 0.4880 | 0.9200 | 0.7761 | 0.7487 | 0.7332 | 0.0900 |
| COPZ1      | 0.5711 | 0.9756 | 0.7454 | 0.6406 | 0.7332 | 0.0884 |
| H2AFV      | 0.5891 | 0.8438 | 0.7696 | 0.7307 | 0.7333 | 0.0535 |
| LOC732360  | 0.5511 | 0.9925 | 0.7630 | 0.6265 | 0.7333 | 0.0969 |
| SLC39A10   | 0.5182 | 0.9264 | 0.8872 | 0.6018 | 0.7334 | 0.1019 |
| SCLY       | 0.6132 | 0.8469 | 0.6661 | 0.8077 | 0.7334 | 0.0558 |
| PHCA       | 0.5210 | 0.8729 | 0.7674 | 0.7728 | 0.7335 | 0.0749 |
| NKD2       | 0.5878 | 0.9634 | 0.7333 | 0.6504 | 0.7337 | 0.0822 |
| CTDSPL2    | 0.5915 | 0.9608 | 0.7406 | 0.6425 | 0.7339 | 0.0817 |
| ACBD6      | 0.5182 | 0.9999 | 0.8502 | 0.5676 | 0.7340 | 0.1149 |
| RAD54B     | 0.6540 | 0.8576 | 0.7249 | 0.6999 | 0.7341 | 0.0437 |
| COPS6      | 0.5271 | 1.1623 | 0.6789 | 0.5691 | 0.7343 | 0.1462 |
| CRTC3      | 0.6540 | 0.9776 | 0.7039 | 0.6024 | 0.7345 | 0.0836 |
| C10orf125  | 0.5530 | 0.9277 | 0.7912 | 0.6660 | 0.7345 | 0.0807 |
| ANKLE2     | 0.5881 | 1.0185 | 0.6690 | 0.6623 | 0.7345 | 0.0964 |
| LOC1001284 | 0.5001 | 0.7996 | 1.1232 | 0.5153 | 0.7345 | 0.1467 |
| SURF6      | 0.5195 | 1.0133 | 0.7701 | 0.6354 | 0.7346 | 0.1061 |
| C12orf49   | 0.5982 | 0.8929 | 0.7649 | 0.6825 | 0.7346 | 0.0628 |
| AMMECR1    | 0.5936 | 0.8703 | 0.8242 | 0.6512 | 0.7348 | 0.0666 |
| C14orf167  | 0.5567 | 0.9963 | 0.7789 | 0.6074 | 0.7348 | 0.0993 |
| SLC38A2    | 0.6262 | 0.9186 | 0.9290 | 0.4658 | 0.7349 | 0.1139 |
| C7orf36    | 0.6046 | 0.8685 | 0.8874 | 0.5798 | 0.7351 | 0.0827 |
| APITD1     | 0.5571 | 0.8993 | 0.8194 | 0.6657 | 0.7354 | 0.0767 |
| RSL1D1     | 0.6069 | 0.8823 | 0.8145 | 0.6381 | 0.7355 | 0.0670 |
| ARL2       | 0.5610 | 0.9998 | 0.8066 | 0.5746 | 0.7355 | 0.1046 |
| LOC651316  | 0.5732 | 0.9371 | 0.7372 | 0.6946 | 0.7355 | 0.0756 |
| ADCK2      | 0.6068 | 0.8994 | 0.7985 | 0.6375 | 0.7355 | 0.0689 |
| LOC442727  | 0.5412 | 0.8433 | 0.8249 | 0.7328 | 0.7355 | 0.0691 |
| MRPL3      | 0.5155 | 1.0202 | 0.7649 | 0.6417 | 0.7356 | 0.1077 |
| SNORD110   | 0.4555 | 0.9334 | 0.7921 | 0.7613 | 0.7356 | 0.1006 |
| SDHD       | 0.5622 | 0.7749 | 1.0632 | 0.5423 | 0.7356 | 0.1212 |
| TRMU       | 0.6781 | 0.9540 | 0.6689 | 0.6419 | 0.7357 | 0.0732 |
| INSIG1     | 0.5859 | 0.9867 | 0.8152 | 0.5559 | 0.7359 | 0.1017 |
| BTN3A3     | 0.6385 | 0.9179 | 0.6947 | 0.6926 | 0.7360 | 0.0620 |
| GAMT       | 0.4929 | 1.0438 | 0.7493 | 0.6582 | 0.7360 | 0.1155 |
| EXOSC5     | 0.5864 | 0.9034 | 0.8492 | 0.6056 | 0.7361 | 0.0818 |
| SARS       | 0.7544 | 0.7680 | 0.8701 | 0.5523 | 0.7362 | 0.0665 |
| ST3GAL1    | 0.5497 | 1.1164 | 0.7078 | 0.5714 | 0.7363 | 0.1314 |
| ABCF1      | 0.5315 | 1.0825 | 0.7350 | 0.5965 | 0.7364 | 0.1229 |
| ACPP       | 0.8772 | 0.8299 | 0.6817 | 0.5571 | 0.7365 | 0.0729 |
| MTA2       | 0.4386 | 1.0263 | 0.8245 | 0.6568 | 0.7365 | 0.1248 |
| UNG        | 0.4972 | 1.0560 | 0.7233 | 0.6703 | 0.7367 | 0.1169 |
| SEC22A     | 0.7080 | 0.8631 | 0.7083 | 0.6686 | 0.7370 | 0.0430 |
| DERL1      | 0.7006 | 0.8387 | 0.6998 | 0.7089 | 0.7370 | 0.0340 |
| LEO1       | 0.6716 | 0.9759 | 0.7095 | 0.5913 | 0.7371 | 0.0833 |
| ABCB10     | 0.6063 | 0.9534 | 0.7588 | 0.6301 | 0.7371 | 0.0795 |

|           |        |        |        |        |        |        |
|-----------|--------|--------|--------|--------|--------|--------|
| C17orf89  | 0.5154 | 1.0858 | 0.7035 | 0.6447 | 0.7373 | 0.1226 |
| HDAC2     | 0.5713 | 0.8052 | 0.9686 | 0.6044 | 0.7374 | 0.0928 |
| GTPBP3    | 0.6505 | 0.9551 | 0.6970 | 0.6473 | 0.7375 | 0.0734 |
| C14orf104 | 0.6022 | 0.8764 | 0.9236 | 0.5477 | 0.7375 | 0.0950 |
| NFYC      | 0.6769 | 0.7965 | 0.7928 | 0.6837 | 0.7375 | 0.0330 |
| TBC1D4    | 0.6227 | 0.8914 | 0.7962 | 0.6401 | 0.7376 | 0.0644 |
| FXC1      | 0.6121 | 1.0180 | 0.7412 | 0.5791 | 0.7376 | 0.0998 |
| OGG1      | 0.5999 | 0.9826 | 0.7278 | 0.6414 | 0.7379 | 0.0858 |
| PSMB5     | 0.5657 | 1.1540 | 0.6486 | 0.5843 | 0.7382 | 0.1397 |
| PAICS     | 0.5485 | 1.0001 | 0.7676 | 0.6366 | 0.7382 | 0.0982 |
| CRTAP     | 0.5992 | 0.9825 | 0.7237 | 0.6475 | 0.7382 | 0.0854 |
| LOC201725 | 0.6361 | 0.7843 | 0.8482 | 0.6853 | 0.7385 | 0.0478 |
| WDR90     | 0.6600 | 0.9393 | 0.6918 | 0.6629 | 0.7385 | 0.0673 |
| ACADSB    | 0.6647 | 0.9376 | 0.7067 | 0.6453 | 0.7386 | 0.0676 |
| LIG1      | 0.6895 | 0.9037 | 0.6397 | 0.7214 | 0.7386 | 0.0576 |
| TMEM126A  | 0.6360 | 0.8259 | 0.8130 | 0.6801 | 0.7387 | 0.0475 |
| PPIAL4A   | 0.5729 | 0.8543 | 0.9329 | 0.5954 | 0.7389 | 0.0909 |
| UBXN8     | 0.6148 | 0.8645 | 0.7990 | 0.6772 | 0.7389 | 0.0567 |
| ZFPM1     | 0.6304 | 0.9132 | 0.7316 | 0.6812 | 0.7391 | 0.0616 |
| PIK3CB    | 0.5236 | 0.8911 | 0.8109 | 0.7308 | 0.7391 | 0.0789 |
| FAM122B   | 0.7001 | 0.8115 | 0.7826 | 0.6633 | 0.7393 | 0.0346 |
| TXNDC15   | 0.5216 | 0.9212 | 0.9303 | 0.5843 | 0.7394 | 0.1084 |
| RAN       | 0.6036 | 0.9241 | 0.8174 | 0.6126 | 0.7394 | 0.0789 |
| TUSC2     | 0.5562 | 1.0233 | 0.7663 | 0.6122 | 0.7395 | 0.1045 |
| TCFL5     | 0.5505 | 1.0297 | 0.6722 | 0.7060 | 0.7396 | 0.1023 |
| MRPS15    | 0.6164 | 0.9251 | 0.8271 | 0.5900 | 0.7396 | 0.0815 |
| ARHGEF2   | 0.6637 | 0.8804 | 0.7237 | 0.6910 | 0.7397 | 0.0485 |
| YEATS2    | 0.6675 | 0.9017 | 0.7379 | 0.6519 | 0.7397 | 0.0571 |
| SEL1L3    | 0.6640 | 0.9316 | 0.6825 | 0.6810 | 0.7398 | 0.0641 |
| SLC30A5   | 0.6284 | 0.9323 | 0.7761 | 0.6229 | 0.7399 | 0.0733 |
| PIGO      | 0.6408 | 0.9648 | 0.7130 | 0.6414 | 0.7400 | 0.0768 |
| THOC1     | 0.6217 | 0.8259 | 0.8375 | 0.6759 | 0.7402 | 0.0540 |
| SMPDL3B   | 0.6140 | 0.9436 | 0.7309 | 0.6727 | 0.7403 | 0.0718 |
| LIN54     | 0.6114 | 0.7077 | 0.8372 | 0.8048 | 0.7403 | 0.0510 |
| LOC647302 | 0.5863 | 0.9662 | 0.7974 | 0.6118 | 0.7404 | 0.0887 |
| LOC653994 | 0.4306 | 1.2515 | 0.6534 | 0.6266 | 0.7405 | 0.1774 |
| APRT      | 0.4735 | 1.0540 | 0.8024 | 0.6339 | 0.7409 | 0.1241 |
| SPAG5     | 0.5748 | 0.8808 | 0.7400 | 0.7692 | 0.7412 | 0.0632 |
| SF3A2     | 0.5524 | 0.8939 | 0.8593 | 0.6595 | 0.7413 | 0.0814 |
| MFF       | 0.5941 | 0.8654 | 0.8187 | 0.6870 | 0.7413 | 0.0619 |
| GALK2     | 0.6136 | 1.0470 | 0.7102 | 0.5945 | 0.7413 | 0.1050 |
| LOC145837 | 0.6030 | 1.0659 | 0.6637 | 0.6333 | 0.7415 | 0.1088 |
| MYNN      | 0.6573 | 0.8351 | 0.8060 | 0.6677 | 0.7415 | 0.0461 |
| NAE1      | 0.5957 | 1.0700 | 0.7149 | 0.5858 | 0.7416 | 0.1133 |
| HIST1H3H  | 0.4738 | 1.0515 | 0.7533 | 0.6885 | 0.7418 | 0.1193 |
| LOC647859 | 0.6357 | 0.8563 | 0.7545 | 0.7220 | 0.7421 | 0.0456 |

|           |        |        |        |        |        |        |
|-----------|--------|--------|--------|--------|--------|--------|
| H3F3B     | 0.5979 | 0.8771 | 0.7967 | 0.6971 | 0.7422 | 0.0606 |
| C16orf13  | 0.5052 | 1.0101 | 0.8085 | 0.6455 | 0.7423 | 0.1086 |
| YRDC      | 0.5678 | 0.9677 | 0.7773 | 0.6566 | 0.7424 | 0.0865 |
| DENR      | 0.6227 | 0.9208 | 0.8354 | 0.5914 | 0.7426 | 0.0804 |
| TUBB      | 0.6197 | 1.0452 | 0.7226 | 0.5833 | 0.7427 | 0.1051 |
| STRBP     | 0.7180 | 0.8620 | 0.7245 | 0.6676 | 0.7430 | 0.0417 |
| NXF1      | 0.6001 | 1.0265 | 0.6546 | 0.6910 | 0.7430 | 0.0963 |
| MRPL42    | 0.5364 | 0.9618 | 0.8884 | 0.5857 | 0.7431 | 0.1066 |
| EIF4EBP2  | 0.6518 | 0.9765 | 0.6464 | 0.6980 | 0.7432 | 0.0786 |
| RAB22A    | 0.6543 | 0.9565 | 0.7637 | 0.5984 | 0.7432 | 0.0790 |
| MKRN1     | 0.6787 | 0.9439 | 0.7292 | 0.6214 | 0.7433 | 0.0704 |
| MAK16     | 0.5947 | 0.8201 | 1.0166 | 0.5417 | 0.7433 | 0.1093 |
| SFRS1     | 0.6374 | 1.0079 | 0.7933 | 0.5347 | 0.7433 | 0.1030 |
| NUP88     | 0.5576 | 0.8638 | 0.9088 | 0.6437 | 0.7435 | 0.0848 |
| FLJ22184  | 0.7095 | 0.8418 | 0.7101 | 0.7127 | 0.7435 | 0.0328 |
| VASH2     | 0.6573 | 0.8827 | 0.7265 | 0.7079 | 0.7436 | 0.0486 |
| CCNO      | 0.6729 | 0.9439 | 0.6782 | 0.6802 | 0.7438 | 0.0667 |
| URM1      | 0.6282 | 0.9278 | 0.8198 | 0.5994 | 0.7438 | 0.0784 |
| PPIL3     | 0.6223 | 0.9648 | 0.7869 | 0.6015 | 0.7439 | 0.0845 |
| CA12      | 0.5481 | 0.9343 | 0.7581 | 0.7351 | 0.7439 | 0.0790 |
| VAR52     | 0.6188 | 0.9394 | 0.7457 | 0.6718 | 0.7439 | 0.0702 |
| LOC728698 | 0.4825 | 1.0397 | 0.8370 | 0.6174 | 0.7441 | 0.1226 |
| BAG3      | 0.6193 | 0.8900 | 0.8181 | 0.6496 | 0.7442 | 0.0654 |
| TRIT1     | 0.6163 | 0.8569 | 0.9626 | 0.5413 | 0.7443 | 0.0991 |
| LOC728825 | 0.6077 | 0.9423 | 0.7105 | 0.7169 | 0.7444 | 0.0706 |
| ATRIP     | 0.5975 | 0.9605 | 0.7326 | 0.6872 | 0.7445 | 0.0773 |
| RNU6-1    | 0.5165 | 0.8822 | 0.8733 | 0.7060 | 0.7445 | 0.0861 |
| MOBK3     | 0.6538 | 0.9213 | 0.8049 | 0.5983 | 0.7446 | 0.0733 |
| NGDN      | 0.5973 | 0.9321 | 0.7896 | 0.6600 | 0.7447 | 0.0742 |
| NDUFA9    | 0.5638 | 1.0284 | 0.7724 | 0.6143 | 0.7447 | 0.1045 |
| PHKA1     | 0.7209 | 0.8865 | 0.7335 | 0.6381 | 0.7447 | 0.0518 |
| HMGB3     | 0.7053 | 0.9377 | 0.6654 | 0.6707 | 0.7448 | 0.0649 |
| KLHDC4    | 0.6247 | 0.8702 | 0.8450 | 0.6396 | 0.7449 | 0.0654 |
| LOC653820 | 0.6334 | 0.8231 | 0.7859 | 0.7372 | 0.7449 | 0.0411 |
| C9orf100  | 0.6485 | 0.8428 | 0.7598 | 0.7292 | 0.7451 | 0.0402 |
| TNPO2     | 0.5373 | 1.0219 | 0.8113 | 0.6105 | 0.7452 | 0.1089 |
| METTL5    | 0.5774 | 0.8959 | 0.8620 | 0.6459 | 0.7453 | 0.0787 |
| PAK1IP1   | 0.5824 | 1.0340 | 0.7610 | 0.6039 | 0.7453 | 0.1041 |
| EML1      | 0.6285 | 0.9575 | 0.6744 | 0.7211 | 0.7454 | 0.0732 |
| SNRPG     | 0.6060 | 0.8600 | 0.8956 | 0.6203 | 0.7455 | 0.0768 |
| SET       | 0.5995 | 0.9658 | 0.8283 | 0.5887 | 0.7456 | 0.0919 |
| C1orf41   | 0.6364 | 0.9257 | 0.6945 | 0.7258 | 0.7456 | 0.0628 |
| FAM45A    | 0.6321 | 0.8201 | 0.9402 | 0.5900 | 0.7456 | 0.0819 |
| RPL28     | 0.6873 | 0.9801 | 0.5862 | 0.7288 | 0.7456 | 0.0837 |
| C7orf28A  | 0.6177 | 0.9536 | 0.7483 | 0.6646 | 0.7460 | 0.0743 |
| HCFC1R1   | 0.5714 | 1.0533 | 0.6798 | 0.6797 | 0.7461 | 0.1056 |

|           |        |        |        |        |        |        |
|-----------|--------|--------|--------|--------|--------|--------|
| PPP1R16A  | 0.6013 | 1.0726 | 0.7032 | 0.6076 | 0.7462 | 0.1113 |
| MYH10     | 0.7225 | 0.9668 | 0.6722 | 0.6234 | 0.7462 | 0.0762 |
| STX10     | 0.5748 | 1.0622 | 0.6332 | 0.7147 | 0.7463 | 0.1092 |
| CALM2     | 0.5518 | 0.9156 | 0.8586 | 0.6593 | 0.7463 | 0.0850 |
| FASTKD2   | 0.5924 | 1.0320 | 0.7313 | 0.6296 | 0.7463 | 0.0996 |
| TIGD5     | 0.6509 | 0.9945 | 0.7408 | 0.5993 | 0.7464 | 0.0877 |
| FAM117B   | 0.6573 | 0.8705 | 0.7478 | 0.7108 | 0.7466 | 0.0453 |
| RBM25     | 0.5466 | 1.0733 | 0.8191 | 0.5484 | 0.7468 | 0.1262 |
| LOC643856 | 0.5540 | 1.0419 | 0.7499 | 0.6415 | 0.7469 | 0.1062 |
| PRMT1     | 0.5398 | 1.0761 | 0.7626 | 0.6089 | 0.7469 | 0.1192 |
| ACTL6A    | 0.5632 | 1.0332 | 0.8100 | 0.5811 | 0.7469 | 0.1107 |
| MIR1228   | 0.6041 | 1.0214 | 0.7824 | 0.5799 | 0.7469 | 0.1020 |
| PROCR     | 0.6970 | 0.9162 | 0.6438 | 0.7308 | 0.7469 | 0.0592 |
| CDC42SE2  | 0.6055 | 0.8764 | 0.8768 | 0.6291 | 0.7470 | 0.0750 |
| BYSL      | 0.5138 | 1.0745 | 0.7680 | 0.6315 | 0.7470 | 0.1209 |
| EXOC5     | 0.6062 | 0.9437 | 0.7848 | 0.6533 | 0.7470 | 0.0757 |
| HSD17B6   | 0.6435 | 0.8426 | 0.7621 | 0.7398 | 0.7470 | 0.0410 |
| AVPI1     | 0.5208 | 1.0474 | 0.8173 | 0.6025 | 0.7470 | 0.1180 |
| C20orf29  | 0.6203 | 0.9274 | 0.8157 | 0.6252 | 0.7472 | 0.0754 |
| SLC10A3   | 0.6289 | 0.9534 | 0.7326 | 0.6742 | 0.7473 | 0.0719 |
| TMEM118   | 0.6024 | 0.9439 | 0.7452 | 0.6977 | 0.7473 | 0.0719 |
| FAM54A    | 0.6405 | 0.8257 | 0.7863 | 0.7369 | 0.7473 | 0.0400 |
| TOPBP1    | 0.6608 | 0.9824 | 0.6844 | 0.6618 | 0.7474 | 0.0785 |
| NEK7      | 0.6669 | 0.8576 | 0.7693 | 0.6965 | 0.7476 | 0.0425 |
| EHF       | 0.4350 | 1.1360 | 0.7775 | 0.6421 | 0.7477 | 0.1474 |
| SKP2      | 0.5210 | 1.0607 | 0.8135 | 0.5955 | 0.7477 | 0.1214 |
| KLHL23    | 0.6699 | 0.8942 | 0.6913 | 0.7356 | 0.7477 | 0.0507 |
| AGGF1     | 0.6761 | 0.9346 | 0.7357 | 0.6450 | 0.7479 | 0.0650 |
| RNF121    | 0.6231 | 0.9534 | 0.7672 | 0.6483 | 0.7480 | 0.0753 |
| SLC39A4   | 0.6879 | 0.9162 | 0.7365 | 0.6517 | 0.7481 | 0.0587 |
| VAPA      | 0.5480 | 0.8536 | 0.8142 | 0.7770 | 0.7482 | 0.0685 |
| AGTRAP    | 0.6480 | 0.9395 | 0.7912 | 0.6140 | 0.7482 | 0.0744 |
| FYCO1     | 0.5477 | 1.1567 | 0.6541 | 0.6349 | 0.7484 | 0.1381 |
| SMCR7L    | 0.7023 | 0.9847 | 0.7783 | 0.5281 | 0.7484 | 0.0946 |
| SRD5A3    | 0.6429 | 0.8273 | 0.8290 | 0.6944 | 0.7484 | 0.0472 |
| LOC653884 | 0.5661 | 1.0143 | 0.7508 | 0.6627 | 0.7484 | 0.0963 |
| ADORA2B   | 0.6740 | 0.9148 | 0.6968 | 0.7083 | 0.7485 | 0.0559 |
| PSMC6     | 0.6179 | 1.0008 | 0.7987 | 0.5765 | 0.7485 | 0.0970 |
| KCTD15    | 0.6349 | 0.9289 | 0.6990 | 0.7313 | 0.7485 | 0.0634 |
| ASAP2     | 0.6791 | 0.8999 | 0.6990 | 0.7165 | 0.7486 | 0.0510 |
| LOC642817 | 0.4054 | 1.2096 | 0.8203 | 0.5591 | 0.7486 | 0.1759 |
| CORO1C    | 0.5632 | 0.9427 | 0.8082 | 0.6806 | 0.7487 | 0.0818 |
| PTGES2    | 0.5804 | 1.0830 | 0.7130 | 0.6187 | 0.7488 | 0.1148 |
| SFRS18    | 0.6349 | 0.8837 | 0.7661 | 0.7104 | 0.7488 | 0.0524 |
| CCT7      | 0.5856 | 0.9721 | 0.8014 | 0.6361 | 0.7488 | 0.0875 |
| BCLAF1    | 0.5730 | 1.0429 | 0.7423 | 0.6373 | 0.7489 | 0.1040 |



|            |        |        |        |        |        |        |
|------------|--------|--------|--------|--------|--------|--------|
| WDR13      | 0.6155 | 1.0239 | 0.7548 | 0.6013 | 0.7489 | 0.0980 |
| ANKRD57    | 0.6109 | 0.9526 | 0.7266 | 0.7055 | 0.7489 | 0.0724 |
| SESN1      | 0.6766 | 0.9836 | 0.7122 | 0.6236 | 0.7490 | 0.0803 |
| C3orf39    | 0.6693 | 0.9126 | 0.7695 | 0.6453 | 0.7492 | 0.0608 |
| C6orf136   | 0.6211 | 0.9657 | 0.8065 | 0.6037 | 0.7492 | 0.0855 |
| LOC729423  | 0.6187 | 1.0174 | 0.6762 | 0.6851 | 0.7493 | 0.0906 |
| DDX49      | 0.7552 | 0.9167 | 0.6646 | 0.6617 | 0.7496 | 0.0598 |
| TMEM14A    | 0.5283 | 1.0638 | 0.7726 | 0.6337 | 0.7496 | 0.1161 |
| FLJ20674   | 0.4847 | 0.9122 | 0.8292 | 0.7727 | 0.7497 | 0.0929 |
| CHCHD1     | 0.6392 | 0.8892 | 0.9166 | 0.5544 | 0.7498 | 0.0902 |
| SDHAF2     | 0.6821 | 0.9482 | 0.7238 | 0.6459 | 0.7500 | 0.0680 |
| SYPL1      | 0.6371 | 0.9937 | 0.7837 | 0.5856 | 0.7501 | 0.0914 |
| SRFBP1     | 0.4951 | 0.9518 | 0.8676 | 0.6858 | 0.7501 | 0.1015 |
| JAG2       | 0.6234 | 0.9484 | 0.7251 | 0.7035 | 0.7501 | 0.0696 |
| PABPN1     | 0.6078 | 1.0081 | 0.7599 | 0.6250 | 0.7502 | 0.0925 |
| KIAA0514   | 0.6988 | 0.8879 | 0.6907 | 0.7234 | 0.7502 | 0.0464 |
| CLEC2D     | 0.5311 | 0.9093 | 0.9547 | 0.6058 | 0.7502 | 0.1065 |
| LOC646849  | 0.5256 | 0.9589 | 0.9088 | 0.6080 | 0.7503 | 0.1078 |
| YWHAQ      | 0.6071 | 0.9970 | 0.8054 | 0.5919 | 0.7504 | 0.0955 |
| C7orf68    | 0.5175 | 0.9274 | 0.7973 | 0.7593 | 0.7504 | 0.0856 |
| MAPKAPK5   | 0.6986 | 0.8988 | 0.7708 | 0.6336 | 0.7505 | 0.0568 |
| NME1       | 0.5809 | 0.9349 | 0.8270 | 0.6599 | 0.7507 | 0.0800 |
| C18orf8    | 0.5793 | 0.9273 | 0.8100 | 0.6864 | 0.7508 | 0.0754 |
| BAZ1A      | 0.5781 | 0.9777 | 0.7765 | 0.6710 | 0.7508 | 0.0858 |
| FLJ38482   | 0.4862 | 0.8774 | 0.9483 | 0.6915 | 0.7509 | 0.1035 |
| ARV1       | 0.6630 | 0.8836 | 0.8286 | 0.6283 | 0.7509 | 0.0622 |
| ADRM1      | 0.6583 | 0.9197 | 0.7986 | 0.6275 | 0.7510 | 0.0674 |
| CNOT7      | 0.5985 | 0.9173 | 0.8335 | 0.6553 | 0.7512 | 0.0747 |
| MRPS5      | 0.6929 | 0.9977 | 0.7459 | 0.5684 | 0.7512 | 0.0902 |
| SH2B3      | 0.8375 | 0.8533 | 0.7412 | 0.5730 | 0.7513 | 0.0644 |
| NQO2       | 0.5474 | 1.0918 | 0.7981 | 0.5688 | 0.7515 | 0.1268 |
| TOX3       | 0.6321 | 1.0243 | 0.7236 | 0.6271 | 0.7518 | 0.0935 |
| C16orf91   | 0.7010 | 0.9046 | 0.7861 | 0.6162 | 0.7520 | 0.0616 |
| TMEM192    | 0.6523 | 0.8736 | 0.8179 | 0.6642 | 0.7520 | 0.0554 |
| SLC39A11   | 0.7149 | 1.0156 | 0.6710 | 0.6068 | 0.7521 | 0.0906 |
| UBQLN1     | 0.6244 | 1.0043 | 0.7660 | 0.6137 | 0.7521 | 0.0909 |
| MARS2      | 0.6418 | 0.9720 | 0.7809 | 0.6142 | 0.7522 | 0.0819 |
| CHCHD7     | 0.5548 | 0.9865 | 0.7776 | 0.6901 | 0.7523 | 0.0905 |
| NOB1       | 0.5060 | 1.0916 | 0.7889 | 0.6226 | 0.7523 | 0.1271 |
| PCBP1      | 0.5630 | 1.0180 | 0.7710 | 0.6578 | 0.7524 | 0.0982 |
| CPSF2      | 0.5563 | 0.9834 | 0.7585 | 0.7120 | 0.7526 | 0.0883 |
| MAD2L2     | 0.6205 | 0.8847 | 0.7543 | 0.7516 | 0.7528 | 0.0539 |
| LOC643438  | 0.6641 | 0.9108 | 0.8384 | 0.5979 | 0.7528 | 0.0731 |
| KIF2A      | 0.6224 | 0.9319 | 0.7987 | 0.6583 | 0.7529 | 0.0708 |
| NUP205     | 0.6128 | 0.9276 | 0.7549 | 0.7164 | 0.7529 | 0.0655 |
| LOC1001315 | 0.7180 | 0.9335 | 0.7933 | 0.5670 | 0.7529 | 0.0764 |

|            |        |        |        |        |        |        |
|------------|--------|--------|--------|--------|--------|--------|
| PSMC4      | 0.6138 | 1.0772 | 0.7190 | 0.6018 | 0.7530 | 0.1112 |
| MRPS30     | 0.4871 | 1.0320 | 0.8401 | 0.6533 | 0.7531 | 0.1177 |
| GLA        | 0.5201 | 0.9972 | 0.8329 | 0.6629 | 0.7533 | 0.1034 |
| LOC652615  | 0.6556 | 0.9406 | 0.6783 | 0.7389 | 0.7533 | 0.0648 |
| NTAN1      | 0.6950 | 0.7473 | 0.8821 | 0.6890 | 0.7534 | 0.0449 |
| KIF15      | 0.6594 | 0.9157 | 0.6888 | 0.7496 | 0.7534 | 0.0573 |
| STXBP5L    | 0.6996 | 0.9231 | 0.6912 | 0.6998 | 0.7534 | 0.0566 |
| ACD        | 0.6954 | 0.9787 | 0.6866 | 0.6537 | 0.7536 | 0.0756 |
| P15RS      | 0.7271 | 0.9963 | 0.7412 | 0.5498 | 0.7536 | 0.0919 |
| TACSTD1    | 0.5379 | 0.9250 | 0.8863 | 0.6653 | 0.7536 | 0.0919 |
| RNF38      | 0.5897 | 0.9709 | 0.7415 | 0.7125 | 0.7537 | 0.0795 |
| SARS2      | 0.5537 | 0.9619 | 0.8193 | 0.6801 | 0.7538 | 0.0881 |
| DPH5       | 0.6797 | 0.9407 | 0.7551 | 0.6399 | 0.7538 | 0.0667 |
| GAGE7      | 0.5806 | 0.7257 | 1.1088 | 0.6004 | 0.7539 | 0.1226 |
| LTBP3      | 0.5139 | 1.0016 | 0.8117 | 0.6883 | 0.7539 | 0.1027 |
| UBE2J1     | 0.6535 | 0.9202 | 0.7546 | 0.6873 | 0.7539 | 0.0593 |
| GEMIN5     | 0.6731 | 1.0311 | 0.7034 | 0.6081 | 0.7539 | 0.0945 |
| TRABD      | 0.6544 | 1.0735 | 0.6989 | 0.5889 | 0.7539 | 0.1089 |
| TNFAIP8L1  | 0.6328 | 0.8382 | 0.8512 | 0.6937 | 0.7540 | 0.0539 |
| ALS2CR4    | 0.5044 | 0.9878 | 0.7992 | 0.7251 | 0.7541 | 0.0999 |
| GTF2E1     | 0.5370 | 1.0626 | 0.7064 | 0.7106 | 0.7541 | 0.1105 |
| WDR53      | 0.5404 | 0.9375 | 0.8256 | 0.7130 | 0.7541 | 0.0847 |
| GAR1       | 0.5542 | 1.0137 | 0.8132 | 0.6360 | 0.7543 | 0.1020 |
| NSMAF      | 0.5390 | 0.9821 | 0.7704 | 0.7257 | 0.7543 | 0.0910 |
| NCBP1      | 0.7093 | 0.9401 | 0.6894 | 0.6786 | 0.7543 | 0.0622 |
| C19orf54   | 0.5948 | 1.0325 | 0.7079 | 0.6825 | 0.7544 | 0.0958 |
| C5orf24    | 0.6152 | 0.8515 | 0.8106 | 0.7407 | 0.7545 | 0.0518 |
| CDV3       | 0.6292 | 0.9736 | 0.7977 | 0.6185 | 0.7547 | 0.0837 |
| FKBP4      | 0.5305 | 1.0181 | 0.8326 | 0.6379 | 0.7548 | 0.1078 |
| DUS4L      | 0.6076 | 0.8499 | 0.8422 | 0.7202 | 0.7550 | 0.0574 |
| LARS       | 0.6724 | 1.0303 | 0.7134 | 0.6038 | 0.7550 | 0.0945 |
| ZNF614     | 0.5983 | 0.9872 | 0.7776 | 0.6570 | 0.7550 | 0.0859 |
| HSD17B10   | 0.5232 | 0.9723 | 0.8263 | 0.6986 | 0.7551 | 0.0954 |
| BRMS1      | 0.6412 | 0.9888 | 0.7684 | 0.6220 | 0.7551 | 0.0844 |
| RNMTL1     | 0.5275 | 0.9556 | 0.8561 | 0.6815 | 0.7552 | 0.0947 |
| ESPL1      | 0.7537 | 0.8562 | 0.7429 | 0.6680 | 0.7552 | 0.0387 |
| TMEM109    | 0.6507 | 0.9840 | 0.7407 | 0.6455 | 0.7552 | 0.0793 |
| UGDH       | 0.7601 | 0.9240 | 0.8188 | 0.5183 | 0.7553 | 0.0860 |
| RUVBL1     | 0.6224 | 0.9412 | 0.8279 | 0.6303 | 0.7555 | 0.0781 |
| NDUFAF2    | 0.5670 | 1.0056 | 0.8513 | 0.5982 | 0.7555 | 0.1049 |
| ADCY9      | 0.6652 | 0.9500 | 0.7186 | 0.6886 | 0.7556 | 0.0657 |
| GCLM       | 0.5910 | 1.0608 | 0.7528 | 0.6177 | 0.7556 | 0.1077 |
| AATF       | 0.6090 | 1.0280 | 0.7592 | 0.6264 | 0.7557 | 0.0968 |
| CDR2       | 0.5705 | 1.0308 | 0.8007 | 0.6211 | 0.7558 | 0.1041 |
| C1orf69    | 0.7174 | 0.9051 | 0.7217 | 0.6789 | 0.7558 | 0.0507 |
| LOC1001280 | 0.5830 | 0.9322 | 0.7897 | 0.7182 | 0.7558 | 0.0728 |

|            |        |        |        |        |        |        |
|------------|--------|--------|--------|--------|--------|--------|
| C10orf78   | 0.5749 | 0.9696 | 0.7285 | 0.7501 | 0.7558 | 0.0812 |
| GPN3       | 0.5559 | 1.1129 | 0.7645 | 0.5899 | 0.7558 | 0.1275 |
| LOC646044  | 0.5982 | 0.9551 | 0.7318 | 0.7384 | 0.7559 | 0.0738 |
| SLC35A2    | 0.5908 | 0.9462 | 0.7906 | 0.6960 | 0.7559 | 0.0754 |
| ESRRAP2    | 0.6082 | 0.9867 | 0.7474 | 0.6813 | 0.7559 | 0.0820 |
| RIMKLB     | 0.6344 | 0.8856 | 0.8184 | 0.6853 | 0.7559 | 0.0581 |
| SNORA70    | 0.6140 | 0.9992 | 0.7237 | 0.6870 | 0.7559 | 0.0842 |
| PPM1K      | 0.7043 | 0.9029 | 0.7923 | 0.6244 | 0.7560 | 0.0598 |
| FLJ12949   | 0.6587 | 0.8785 | 0.8087 | 0.6783 | 0.7561 | 0.0527 |
| EBPL       | 0.5954 | 1.0520 | 0.8545 | 0.5233 | 0.7563 | 0.1216 |
| NOLA1      | 0.5553 | 0.9303 | 0.8183 | 0.7223 | 0.7566 | 0.0794 |
| AASDHPPT   | 0.6287 | 0.9136 | 0.8579 | 0.6263 | 0.7566 | 0.0754 |
| TBCA       | 0.5306 | 1.0159 | 0.8656 | 0.6149 | 0.7568 | 0.1119 |
| ZNHIT1     | 0.6213 | 1.0820 | 0.7496 | 0.5747 | 0.7569 | 0.1145 |
| PCGF6      | 0.6213 | 0.8819 | 0.7902 | 0.7346 | 0.7570 | 0.0545 |
| LOC1001324 | 0.5894 | 0.8159 | 1.0095 | 0.6133 | 0.7570 | 0.0983 |
| LIMS1      | 0.6202 | 0.9805 | 0.8306 | 0.5968 | 0.7570 | 0.0912 |
| NOL11      | 0.6232 | 1.0056 | 0.8183 | 0.5814 | 0.7572 | 0.0976 |
| SRI        | 0.6601 | 0.9268 | 0.7516 | 0.6907 | 0.7573 | 0.0596 |
| ZFP36L2    | 0.6096 | 0.9057 | 0.7886 | 0.7253 | 0.7573 | 0.0618 |
| VPS37D     | 0.6987 | 1.0242 | 0.6606 | 0.6460 | 0.7574 | 0.0896 |
| C4orf27    | 0.7317 | 0.8907 | 0.8197 | 0.5876 | 0.7574 | 0.0653 |
| UTP14A     | 0.5930 | 1.0437 | 0.7681 | 0.6251 | 0.7575 | 0.1027 |
| UBAP2L     | 0.5850 | 1.0318 | 0.7243 | 0.6888 | 0.7575 | 0.0961 |
| BAG5       | 0.6670 | 0.9585 | 0.7725 | 0.6328 | 0.7577 | 0.0732 |
| C9orf21    | 0.5521 | 0.9154 | 0.9058 | 0.6578 | 0.7578 | 0.0908 |
| APEX1      | 0.5802 | 1.0125 | 0.8178 | 0.6206 | 0.7578 | 0.0995 |
| ANKRD46    | 0.5806 | 1.0456 | 0.8450 | 0.5604 | 0.7579 | 0.1158 |
| LTV1       | 0.5647 | 0.9389 | 0.8377 | 0.6903 | 0.7579 | 0.0822 |
| ISG20      | 0.7117 | 1.1463 | 0.5808 | 0.5930 | 0.7580 | 0.1328 |
| BEX4       | 0.6395 | 0.9277 | 0.8660 | 0.5994 | 0.7581 | 0.0815 |
| RAC3       | 0.6347 | 1.0576 | 0.7261 | 0.6142 | 0.7581 | 0.1027 |
| SNORD36A   | 0.6493 | 0.8851 | 0.8417 | 0.6565 | 0.7582 | 0.0614 |
| TTYH2      | 0.6934 | 0.9356 | 0.6813 | 0.7226 | 0.7582 | 0.0598 |
| ZNF511     | 0.6245 | 1.0385 | 0.7651 | 0.6049 | 0.7582 | 0.1000 |
| CCDC77     | 0.6218 | 0.8989 | 0.8745 | 0.6383 | 0.7584 | 0.0743 |
| MRPL55     | 0.6573 | 0.9589 | 0.7953 | 0.6224 | 0.7585 | 0.0765 |
| PDE3B      | 0.5402 | 0.9245 | 0.8194 | 0.7500 | 0.7585 | 0.0811 |
| C17orf80   | 0.5764 | 0.9710 | 0.7258 | 0.7610 | 0.7586 | 0.0813 |
| PARVB      | 0.5090 | 0.9757 | 0.9076 | 0.6424 | 0.7587 | 0.1100 |
| PFDN6      | 0.6323 | 1.0224 | 0.7428 | 0.6378 | 0.7588 | 0.0915 |
| CCT6P1     | 0.6247 | 0.8830 | 0.9561 | 0.5719 | 0.7589 | 0.0946 |
| DBNDD2     | 0.5835 | 0.9883 | 0.7262 | 0.7378 | 0.7589 | 0.0841 |
| LOC92755   | 0.5081 | 1.2170 | 0.7214 | 0.5892 | 0.7589 | 0.1589 |
| C11orf48   | 0.6134 | 0.9300 | 0.7870 | 0.7055 | 0.7590 | 0.0671 |
| NUP50      | 0.6064 | 0.8731 | 0.8049 | 0.7520 | 0.7591 | 0.0566 |

|            |        |        |        |        |        |        |
|------------|--------|--------|--------|--------|--------|--------|
| RASSF7     | 0.6139 | 0.9945 | 0.7584 | 0.6697 | 0.7591 | 0.0839 |
| TMEM45A    | 0.7440 | 0.9056 | 0.6356 | 0.7513 | 0.7591 | 0.0555 |
| MIPEP      | 0.6970 | 1.0552 | 0.6216 | 0.6630 | 0.7592 | 0.0999 |
| LOC729123  | 0.6738 | 0.8215 | 0.8994 | 0.6422 | 0.7592 | 0.0609 |
| RPP21      | 0.6504 | 0.9106 | 0.8986 | 0.5776 | 0.7593 | 0.0852 |
| GNL2       | 0.5492 | 0.8886 | 0.9736 | 0.6257 | 0.7593 | 0.1019 |
| GSTT2      | 0.6984 | 0.9891 | 0.6983 | 0.6514 | 0.7593 | 0.0774 |
| NUP37      | 0.5214 | 1.1409 | 0.7772 | 0.5977 | 0.7593 | 0.1380 |
| FKBP2      | 0.7276 | 0.9806 | 0.7232 | 0.6061 | 0.7594 | 0.0789 |
| KHSRP      | 0.5295 | 0.9937 | 0.8423 | 0.6724 | 0.7595 | 0.1009 |
| BRMS1L     | 0.7164 | 0.9822 | 0.7127 | 0.6267 | 0.7595 | 0.0771 |
| MGC57346   | 0.6992 | 0.9328 | 0.7779 | 0.6282 | 0.7595 | 0.0653 |
| ENOPH1     | 0.6343 | 1.0401 | 0.8399 | 0.5240 | 0.7596 | 0.1141 |
| SMARCAD1   | 0.6620 | 0.9268 | 0.7512 | 0.6984 | 0.7596 | 0.0587 |
| ADAM7      | 0.5731 | 0.8883 | 0.8018 | 0.7752 | 0.7596 | 0.0667 |
| HRAS       | 0.6267 | 0.9127 | 0.8652 | 0.6339 | 0.7596 | 0.0753 |
| DNAJC15    | 0.7139 | 0.9056 | 0.7211 | 0.6982 | 0.7597 | 0.0489 |
| UGT8       | 0.6004 | 0.9361 | 0.7743 | 0.7281 | 0.7597 | 0.0693 |
| PAXIP1     | 0.5651 | 1.1171 | 0.7162 | 0.6417 | 0.7600 | 0.1230 |
| LOC1001279 | 0.7581 | 0.9327 | 0.7289 | 0.6208 | 0.7601 | 0.0647 |
| LOC402509  | 0.8140 | 0.8297 | 0.7562 | 0.6410 | 0.7602 | 0.0428 |
| C6orf64    | 0.6484 | 1.2118 | 0.6674 | 0.5136 | 0.7603 | 0.1544 |
| KPNA3      | 0.6052 | 0.8895 | 0.8481 | 0.6986 | 0.7604 | 0.0660 |
| TXNL1      | 0.6144 | 0.9109 | 0.8149 | 0.7016 | 0.7604 | 0.0648 |
| CYB5D1     | 0.6180 | 1.0099 | 0.8128 | 0.6013 | 0.7605 | 0.0960 |
| BOP1       | 0.5425 | 1.0240 | 0.8644 | 0.6111 | 0.7605 | 0.1118 |
| LOC729148  | 0.6265 | 0.9910 | 0.7954 | 0.6293 | 0.7606 | 0.0864 |
| SPC25      | 0.6290 | 0.8013 | 0.9163 | 0.6967 | 0.7608 | 0.0628 |
| LSM3       | 0.5913 | 1.0375 | 0.7961 | 0.6184 | 0.7608 | 0.1028 |
| HLTF       | 0.5735 | 1.1149 | 0.7417 | 0.6140 | 0.7610 | 0.1233 |
| TFDP1      | 0.6026 | 0.9848 | 0.7823 | 0.6747 | 0.7611 | 0.0832 |
| MORF4L1    | 0.6318 | 0.9443 | 0.8913 | 0.5776 | 0.7612 | 0.0917 |
| TMEM55B    | 0.7878 | 0.9107 | 0.6120 | 0.7348 | 0.7613 | 0.0619 |
| PRNPIP     | 0.7346 | 0.8363 | 0.8352 | 0.6399 | 0.7615 | 0.0470 |
| MTR        | 0.6531 | 0.8388 | 0.9234 | 0.6309 | 0.7615 | 0.0713 |
| HSDL2      | 0.6910 | 0.8946 | 0.8302 | 0.6304 | 0.7616 | 0.0610 |
| E2F4       | 0.6190 | 0.9530 | 0.8325 | 0.6420 | 0.7616 | 0.0797 |
| FOXRED1    | 0.6063 | 1.0115 | 0.7388 | 0.6901 | 0.7617 | 0.0877 |
| ITPR3      | 0.7112 | 1.0680 | 0.6428 | 0.6246 | 0.7617 | 0.1038 |
| PDCD5      | 0.5952 | 1.0658 | 0.8330 | 0.5532 | 0.7618 | 0.1186 |
| PDIA4      | 0.6741 | 0.8883 | 0.7691 | 0.7157 | 0.7618 | 0.0464 |
| ARHGEF19   | 0.7078 | 1.0668 | 0.6172 | 0.6556 | 0.7619 | 0.1033 |
| AGPAT5     | 0.4822 | 1.0362 | 0.7926 | 0.7367 | 0.7619 | 0.1137 |
| LOC401588  | 0.6512 | 0.8751 | 0.7240 | 0.7974 | 0.7619 | 0.0481 |
| CCM2       | 0.6400 | 1.0173 | 0.7280 | 0.6627 | 0.7620 | 0.0871 |
| FAIM       | 0.6091 | 0.9799 | 0.8355 | 0.6237 | 0.7620 | 0.0892 |

|            |        |        |        |        |        |        |
|------------|--------|--------|--------|--------|--------|--------|
| BLOC1S1    | 0.8309 | 0.8680 | 0.9525 | 0.3970 | 0.7621 | 0.1243 |
| NRSN2      | 0.6283 | 0.9244 | 0.7691 | 0.7267 | 0.7621 | 0.0616 |
| C12orf66   | 0.5373 | 0.9807 | 0.8438 | 0.6880 | 0.7624 | 0.0959 |
| TMED10     | 0.6293 | 1.0387 | 0.7436 | 0.6383 | 0.7625 | 0.0957 |
| MPZL2      | 0.7065 | 0.9477 | 0.7510 | 0.6452 | 0.7626 | 0.0654 |
| PPP1R10    | 0.7456 | 0.9982 | 0.7153 | 0.5913 | 0.7626 | 0.0853 |
| APOA1      | 0.7469 | 0.8643 | 0.7542 | 0.6851 | 0.7626 | 0.0373 |
| PQLC3      | 0.6462 | 0.9343 | 0.8169 | 0.6532 | 0.7626 | 0.0695 |
| ARMC1      | 0.6896 | 0.9082 | 0.8029 | 0.6501 | 0.7627 | 0.0583 |
| WDR36      | 0.5857 | 1.0468 | 0.7823 | 0.6363 | 0.7628 | 0.1034 |
| LOC642897  | 0.5419 | 0.9782 | 0.8561 | 0.6753 | 0.7629 | 0.0964 |
| POLR1C     | 0.5804 | 1.0724 | 0.7599 | 0.6390 | 0.7629 | 0.1097 |
| FOXN2      | 0.6136 | 0.8887 | 0.8788 | 0.6708 | 0.7630 | 0.0707 |
| LOC1001295 | 0.6081 | 0.8537 | 0.8743 | 0.7160 | 0.7630 | 0.0625 |
| CMC1       | 0.6700 | 0.9841 | 0.7348 | 0.6634 | 0.7631 | 0.0754 |
| C12orf4    | 0.5624 | 1.0309 | 0.8072 | 0.6521 | 0.7632 | 0.1026 |
| FZD9       | 0.6220 | 0.9366 | 0.7993 | 0.6948 | 0.7632 | 0.0683 |
| CREB3L2    | 0.7299 | 0.9943 | 0.6813 | 0.6474 | 0.7632 | 0.0789 |
| ATP5D      | 0.6239 | 0.9940 | 0.8512 | 0.5838 | 0.7632 | 0.0969 |
| LOC647081  | 0.5364 | 0.9877 | 0.9571 | 0.5724 | 0.7634 | 0.1210 |
| PEMT       | 0.6702 | 1.0111 | 0.7575 | 0.6149 | 0.7634 | 0.0876 |
| SRPK2      | 0.5705 | 1.0836 | 0.7684 | 0.6313 | 0.7634 | 0.1145 |
| AHCTF1     | 0.5941 | 1.0025 | 0.8233 | 0.6339 | 0.7635 | 0.0941 |
| TSEN2      | 0.6610 | 0.9599 | 0.7606 | 0.6724 | 0.7635 | 0.0692 |
| DCTPP1     | 0.5631 | 0.9768 | 0.8669 | 0.6473 | 0.7635 | 0.0957 |
| PDPR       | 0.6686 | 0.9746 | 0.7128 | 0.6981 | 0.7635 | 0.0710 |
| PSMG4      | 0.5867 | 1.1856 | 0.6805 | 0.6016 | 0.7636 | 0.1422 |
| RAGE       | 0.6360 | 0.9829 | 0.6688 | 0.7669 | 0.7636 | 0.0782 |
| BNIP3L     | 0.8629 | 0.8718 | 0.7327 | 0.5871 | 0.7636 | 0.0669 |
| MRPL20     | 0.6154 | 1.0005 | 0.7640 | 0.6747 | 0.7637 | 0.0846 |
| LOC647000  | 0.5755 | 1.0394 | 0.8019 | 0.6383 | 0.7637 | 0.1035 |
| MRPL36     | 0.6391 | 0.9468 | 0.8315 | 0.6379 | 0.7639 | 0.0761 |
| PRIM2A     | 0.5885 | 0.9790 | 0.7581 | 0.7304 | 0.7640 | 0.0807 |
| DNAJC27    | 0.6507 | 0.9939 | 0.7115 | 0.7000 | 0.7640 | 0.0777 |
| SLC36A4    | 0.7031 | 0.7824 | 0.8674 | 0.7033 | 0.7641 | 0.0392 |
| LOC653310  | 0.6554 | 0.9409 | 0.7956 | 0.6645 | 0.7641 | 0.0671 |
| RNF220     | 0.6240 | 1.0466 | 0.7682 | 0.6178 | 0.7642 | 0.1004 |
| TSKU       | 0.7063 | 0.9602 | 0.6958 | 0.6947 | 0.7643 | 0.0654 |
| POLG2      | 0.5912 | 0.9392 | 0.8916 | 0.6351 | 0.7643 | 0.0882 |
| C18orf54   | 0.6178 | 1.0019 | 0.6948 | 0.7430 | 0.7644 | 0.0833 |
| RAB21      | 0.7492 | 0.9661 | 0.7847 | 0.5577 | 0.7644 | 0.0837 |
| C16orf53   | 0.5212 | 1.0766 | 0.8369 | 0.6231 | 0.7645 | 0.1231 |
| HSD17B1    | 0.6609 | 0.8879 | 0.8174 | 0.6917 | 0.7645 | 0.0533 |
| MRPL46     | 0.5690 | 1.0253 | 0.8147 | 0.6490 | 0.7645 | 0.1009 |
| TMEM123    | 0.5688 | 1.0713 | 0.7763 | 0.6419 | 0.7646 | 0.1109 |
| TEAD4      | 0.6206 | 0.9147 | 0.8231 | 0.7004 | 0.7647 | 0.0651 |

|            |        |        |        |        |        |        |
|------------|--------|--------|--------|--------|--------|--------|
| TMEM126B   | 0.5298 | 1.0335 | 0.8760 | 0.6201 | 0.7648 | 0.1157 |
| MTIF2      | 0.5977 | 0.9861 | 0.8520 | 0.6240 | 0.7649 | 0.0932 |
| CCDC45     | 0.6355 | 0.8492 | 0.8094 | 0.7658 | 0.7650 | 0.0464 |
| OXTR       | 0.6664 | 0.8608 | 0.8397 | 0.6944 | 0.7653 | 0.0496 |
| KIAA1333   | 0.7183 | 0.8993 | 0.7746 | 0.6695 | 0.7654 | 0.0495 |
| NUCKS1     | 0.5050 | 0.8433 | 0.9887 | 0.7251 | 0.7656 | 0.1022 |
| POLR2H     | 0.5531 | 1.1062 | 0.7895 | 0.6139 | 0.7657 | 0.1241 |
| MORC3      | 0.6380 | 0.9319 | 0.8419 | 0.6514 | 0.7658 | 0.0724 |
| KIAA1468   | 0.5758 | 0.9552 | 0.8515 | 0.6809 | 0.7659 | 0.0849 |
| PAN2       | 0.7891 | 0.9307 | 0.6990 | 0.6447 | 0.7659 | 0.0625 |
| EXOSC4     | 0.6157 | 0.9992 | 0.9068 | 0.5421 | 0.7659 | 0.1107 |
| XBP1       | 0.6187 | 1.0192 | 0.7685 | 0.6573 | 0.7659 | 0.0902 |
| CD3EAP     | 0.5773 | 0.8570 | 0.8558 | 0.7738 | 0.7660 | 0.0658 |
| KEAP1      | 0.6814 | 1.0282 | 0.7004 | 0.6539 | 0.7660 | 0.0879 |
| LOC1001315 | 0.5646 | 0.9635 | 0.8744 | 0.6617 | 0.7661 | 0.0923 |
| RGS10      | 0.6726 | 0.9953 | 0.7759 | 0.6208 | 0.7661 | 0.0829 |
| FLJ12684   | 0.6086 | 0.9707 | 0.7614 | 0.7239 | 0.7662 | 0.0755 |
| LOC648024  | 0.5313 | 1.0265 | 0.8862 | 0.6215 | 0.7664 | 0.1148 |
| ABCA1      | 0.7374 | 0.9165 | 0.6942 | 0.7174 | 0.7664 | 0.0508 |
| LOC729852  | 0.5497 | 1.0472 | 0.7964 | 0.6722 | 0.7664 | 0.1063 |
| STX4       | 0.7064 | 1.0389 | 0.6960 | 0.6244 | 0.7664 | 0.0926 |
| FAM86B1    | 0.5603 | 1.0158 | 0.8263 | 0.6639 | 0.7666 | 0.0995 |
| C18orf55   | 0.5352 | 0.8745 | 0.9492 | 0.7082 | 0.7668 | 0.0922 |
| TMEM147    | 0.6320 | 1.0478 | 0.7621 | 0.6254 | 0.7668 | 0.0988 |
| YIF1B      | 0.6244 | 1.0135 | 0.7847 | 0.6455 | 0.7670 | 0.0895 |
| PARP1      | 0.6379 | 0.9849 | 0.8141 | 0.6317 | 0.7671 | 0.0840 |
| SNORD35B   | 0.7734 | 0.7827 | 0.8431 | 0.6693 | 0.7671 | 0.0361 |
| LOC345041  | 0.5202 | 1.1538 | 0.7781 | 0.6168 | 0.7672 | 0.1394 |
| RPUSD1     | 0.5803 | 0.9054 | 0.8414 | 0.7419 | 0.7672 | 0.0708 |
| TRAIP      | 0.6993 | 0.7973 | 0.7583 | 0.8141 | 0.7673 | 0.0255 |
| NUPR1      | 0.7716 | 0.9138 | 0.6272 | 0.7565 | 0.7673 | 0.0586 |
| STRADB     | 0.6157 | 1.1121 | 0.6665 | 0.6750 | 0.7673 | 0.1157 |
| SPATS2L    | 0.6144 | 1.0148 | 0.8583 | 0.5818 | 0.7673 | 0.1030 |
| APOA1BP    | 0.5581 | 0.9601 | 0.9558 | 0.5953 | 0.7673 | 0.1103 |
| ANAPC5     | 0.6292 | 1.1286 | 0.7625 | 0.5493 | 0.7674 | 0.1282 |
| CCDC12     | 0.6986 | 0.9895 | 0.6739 | 0.7079 | 0.7675 | 0.0743 |
| ACP1       | 0.5710 | 1.0788 | 0.7638 | 0.6563 | 0.7675 | 0.1110 |
| LOC644033  | 0.6443 | 0.9544 | 0.8744 | 0.5971 | 0.7675 | 0.0869 |
| TAF6L      | 0.6090 | 1.0090 | 0.8126 | 0.6405 | 0.7678 | 0.0920 |
| LOC1001338 | 0.6184 | 1.0243 | 0.7868 | 0.6420 | 0.7679 | 0.0932 |
| C9orf5     | 0.5961 | 0.8593 | 1.0036 | 0.6133 | 0.7681 | 0.0989 |
| SLC25A36   | 0.6211 | 1.0643 | 0.7370 | 0.6503 | 0.7682 | 0.1017 |
| HTRA2      | 0.6422 | 0.9631 | 0.7460 | 0.7220 | 0.7683 | 0.0686 |
| NOP14      | 0.5282 | 0.8883 | 0.9826 | 0.6742 | 0.7683 | 0.1028 |
| LOC652826  | 0.5995 | 1.1157 | 0.7656 | 0.5926 | 0.7683 | 0.1225 |
| NRTN       | 0.6350 | 0.9057 | 0.8028 | 0.7306 | 0.7685 | 0.0572 |

|            |        |        |        |        |        |        |
|------------|--------|--------|--------|--------|--------|--------|
| DENND1A    | 0.5959 | 1.0010 | 0.8108 | 0.6675 | 0.7688 | 0.0894 |
| ISCA2      | 0.6736 | 0.8895 | 0.8402 | 0.6720 | 0.7688 | 0.0563 |
| KPNB1      | 0.6306 | 0.9098 | 0.9199 | 0.6154 | 0.7689 | 0.0843 |
| TCTA       | 0.5918 | 1.0399 | 0.7726 | 0.6718 | 0.7690 | 0.0976 |
| PABPC4     | 0.5977 | 1.0428 | 0.7546 | 0.6811 | 0.7690 | 0.0967 |
| PYCR1      | 0.7784 | 0.9737 | 0.6436 | 0.6809 | 0.7692 | 0.0739 |
| WDR81      | 0.7184 | 0.9304 | 0.7245 | 0.7041 | 0.7694 | 0.0539 |
| POLD1      | 0.7012 | 0.9168 | 0.7064 | 0.7533 | 0.7694 | 0.0505 |
| BCL7C      | 0.6965 | 0.8600 | 0.8497 | 0.6720 | 0.7695 | 0.0495 |
| USP14      | 0.5753 | 0.9300 | 0.8359 | 0.7371 | 0.7696 | 0.0758 |
| NCOA6      | 0.6723 | 1.2147 | 0.6103 | 0.5815 | 0.7697 | 0.1495 |
| GOLM1      | 0.7332 | 0.9061 | 0.8293 | 0.6103 | 0.7697 | 0.0638 |
| SP1        | 0.6447 | 0.9611 | 0.8229 | 0.6504 | 0.7698 | 0.0760 |
| LOC390557  | 0.5852 | 1.2160 | 0.7099 | 0.5682 | 0.7698 | 0.1520 |
| ADAP2      | 0.6416 | 1.0302 | 0.7684 | 0.6392 | 0.7698 | 0.0919 |
| CLPTM1L    | 0.5646 | 1.0451 | 0.8025 | 0.6671 | 0.7698 | 0.1039 |
| C18orf19   | 0.5591 | 0.9827 | 0.8244 | 0.7132 | 0.7699 | 0.0894 |
| HNRNPR     | 0.6649 | 1.0092 | 0.7689 | 0.6364 | 0.7699 | 0.0847 |
| ZNF583     | 0.5949 | 0.9024 | 0.8710 | 0.7114 | 0.7699 | 0.0718 |
| LOC1001329 | 0.6442 | 1.0040 | 0.8470 | 0.5844 | 0.7699 | 0.0962 |
| DCPS       | 0.6802 | 0.9676 | 0.7186 | 0.7134 | 0.7699 | 0.0664 |
| FANCE      | 0.6221 | 1.0115 | 0.8037 | 0.6426 | 0.7700 | 0.0902 |
| HSPB1      | 0.6081 | 0.9929 | 0.8481 | 0.6311 | 0.7701 | 0.0919 |
| ZDHHC6     | 0.7059 | 0.9962 | 0.7858 | 0.5928 | 0.7702 | 0.0851 |
| LPAR3      | 0.5289 | 1.0407 | 0.9214 | 0.5903 | 0.7703 | 0.1247 |
| GHDC       | 0.7993 | 0.7964 | 0.7759 | 0.7098 | 0.7704 | 0.0208 |
| LOC728368  | 0.6431 | 0.8864 | 0.9148 | 0.6373 | 0.7704 | 0.0754 |
| GDI2       | 0.6203 | 0.9669 | 0.9165 | 0.5780 | 0.7704 | 0.0998 |
| LOC644101  | 0.6127 | 0.8968 | 0.8378 | 0.7345 | 0.7704 | 0.0624 |
| TMEM209    | 0.6036 | 0.9634 | 0.9021 | 0.6129 | 0.7705 | 0.0945 |
| TRIM61     | 0.5680 | 1.0135 | 0.8481 | 0.6529 | 0.7706 | 0.1000 |
| ADAM9      | 0.3985 | 1.2766 | 0.7467 | 0.6607 | 0.7706 | 0.1842 |
| CEBPB      | 0.6501 | 1.0624 | 0.7120 | 0.6581 | 0.7707 | 0.0982 |
| FSIP1      | 0.7225 | 0.8358 | 0.7942 | 0.7306 | 0.7708 | 0.0270 |
| TOMM6      | 0.5978 | 0.9228 | 0.9181 | 0.6446 | 0.7708 | 0.0869 |
| WDR12      | 0.5796 | 1.0237 | 0.8017 | 0.6783 | 0.7708 | 0.0958 |
| PLEKHB2    | 0.5656 | 1.0207 | 0.7367 | 0.7603 | 0.7708 | 0.0939 |
| RPAP3      | 0.5843 | 1.0338 | 0.7829 | 0.6824 | 0.7709 | 0.0966 |
| MIR586     | 0.5727 | 1.0885 | 0.7974 | 0.6253 | 0.7710 | 0.1162 |
| EHBP1L1    | 0.7621 | 0.8413 | 0.7184 | 0.7623 | 0.7710 | 0.0256 |
| MRRF       | 0.6192 | 1.0662 | 0.7387 | 0.6603 | 0.7711 | 0.1014 |
| LOC643167  | 0.7321 | 1.0229 | 0.7458 | 0.5838 | 0.7712 | 0.0916 |
| HSD11B2    | 0.5604 | 0.8968 | 0.8929 | 0.7346 | 0.7712 | 0.0798 |
| TPI1       | 0.7425 | 0.9055 | 0.8315 | 0.6053 | 0.7712 | 0.0646 |
| DBR1       | 0.6334 | 0.8988 | 0.7975 | 0.7553 | 0.7712 | 0.0549 |
| DHFR       | 0.6523 | 0.8675 | 0.9002 | 0.6649 | 0.7712 | 0.0654 |

|            |        |        |        |        |        |        |
|------------|--------|--------|--------|--------|--------|--------|
| TCERG1     | 0.6793 | 0.9145 | 0.7572 | 0.7340 | 0.7713 | 0.0504 |
| FAM98A     | 0.5445 | 0.8318 | 1.0769 | 0.6326 | 0.7714 | 0.1182 |
| FLJ45248   | 0.8161 | 0.8426 | 0.7735 | 0.6538 | 0.7715 | 0.0417 |
| ARF3       | 0.6321 | 1.0959 | 0.7297 | 0.6287 | 0.7716 | 0.1106 |
| SLC39A9    | 0.6818 | 0.9409 | 0.8585 | 0.6052 | 0.7716 | 0.0774 |
| CCDC14     | 0.6968 | 1.0617 | 0.7232 | 0.6052 | 0.7717 | 0.0999 |
| RPE        | 0.6301 | 1.0274 | 0.7581 | 0.6719 | 0.7719 | 0.0892 |
| EPDR1      | 0.7062 | 0.9967 | 0.7747 | 0.6099 | 0.7719 | 0.0822 |
| CDCA7L     | 0.5748 | 1.0014 | 0.9055 | 0.6065 | 0.7721 | 0.1067 |
| ZNF275     | 0.5828 | 1.0176 | 0.8185 | 0.6695 | 0.7721 | 0.0952 |
| SNF8       | 0.8074 | 0.7735 | 0.7944 | 0.7132 | 0.7721 | 0.0208 |
| C5orf34    | 0.6132 | 0.8959 | 0.7614 | 0.8182 | 0.7722 | 0.0597 |
| MGC72080   | 0.6265 | 0.9396 | 0.8732 | 0.6495 | 0.7722 | 0.0788 |
| SLC35D2    | 0.6936 | 0.9815 | 0.7758 | 0.6382 | 0.7723 | 0.0753 |
| ANKRD29    | 0.6633 | 0.8224 | 0.9489 | 0.6545 | 0.7723 | 0.0704 |
| BCCIP      | 0.5505 | 1.0531 | 0.8302 | 0.6554 | 0.7723 | 0.1100 |
| ZNF787     | 0.6537 | 0.8821 | 0.8557 | 0.6978 | 0.7723 | 0.0567 |
| C6orf125   | 0.7221 | 0.8847 | 0.8293 | 0.6531 | 0.7723 | 0.0521 |
| ASXL2      | 0.5471 | 1.1161 | 0.7449 | 0.6814 | 0.7724 | 0.1218 |
| RNF167     | 0.6705 | 0.9930 | 0.8540 | 0.5721 | 0.7724 | 0.0939 |
| CCDC124    | 0.5898 | 1.0119 | 0.7740 | 0.7141 | 0.7725 | 0.0886 |
| BNIP3      | 0.8201 | 1.0468 | 0.6619 | 0.5611 | 0.7725 | 0.1059 |
| PSMD11     | 0.5221 | 1.0070 | 0.8292 | 0.7320 | 0.7726 | 0.1010 |
| C16orf80   | 0.7167 | 1.0152 | 0.7551 | 0.6040 | 0.7728 | 0.0869 |
| TMEM167A   | 0.6008 | 0.9236 | 0.9801 | 0.5869 | 0.7728 | 0.1040 |
| CTCF       | 0.6388 | 1.0675 | 0.7037 | 0.6820 | 0.7730 | 0.0991 |
| EIF2AK2    | 0.6164 | 0.8456 | 0.9773 | 0.6528 | 0.7730 | 0.0847 |
| PKM2       | 0.6636 | 1.0553 | 0.7307 | 0.6428 | 0.7731 | 0.0959 |
| SLTM       | 0.6371 | 0.9909 | 0.8046 | 0.6598 | 0.7731 | 0.0815 |
| FAM89A     | 0.6251 | 0.9599 | 0.8210 | 0.6866 | 0.7731 | 0.0745 |
| ZP3        | 0.7613 | 0.9579 | 0.7385 | 0.6350 | 0.7732 | 0.0674 |
| ACTR6      | 0.6478 | 1.0428 | 0.8065 | 0.5958 | 0.7732 | 0.1004 |
| MRPL22     | 0.6179 | 1.0026 | 0.8078 | 0.6647 | 0.7732 | 0.0865 |
| MRPL38     | 0.6638 | 0.9091 | 0.8705 | 0.6502 | 0.7734 | 0.0677 |
| HAGHL      | 0.6164 | 0.9693 | 0.7575 | 0.7514 | 0.7736 | 0.0729 |
| NUDT18     | 0.7169 | 1.0297 | 0.6813 | 0.6668 | 0.7737 | 0.0860 |
| RAPGEF5    | 0.6824 | 0.9506 | 0.8182 | 0.6437 | 0.7737 | 0.0698 |
| NSMCE4A    | 0.7248 | 0.9301 | 0.7549 | 0.6853 | 0.7738 | 0.0540 |
| NRBF2      | 0.6615 | 0.7407 | 0.9388 | 0.7544 | 0.7739 | 0.0587 |
| LOC441050  | 0.5118 | 1.2444 | 0.7674 | 0.5721 | 0.7739 | 0.1660 |
| RNF26      | 0.6692 | 0.9503 | 0.8029 | 0.6743 | 0.7742 | 0.0663 |
| PI4K2B     | 0.6072 | 1.0055 | 0.7626 | 0.7214 | 0.7742 | 0.0838 |
| TFRC       | 0.6598 | 1.0776 | 0.7801 | 0.5798 | 0.7743 | 0.1092 |
| CXorf15    | 0.6308 | 0.9349 | 0.8096 | 0.7223 | 0.7744 | 0.0648 |
| LOC1001336 | 0.5903 | 0.9976 | 0.7885 | 0.7214 | 0.7745 | 0.0850 |
| UHMK1      | 0.6469 | 0.9704 | 0.7889 | 0.6922 | 0.7746 | 0.0717 |



|            |        |        |        |        |        |        |
|------------|--------|--------|--------|--------|--------|--------|
| PARP16     | 0.8040 | 0.7915 | 0.7040 | 0.7990 | 0.7746 | 0.0237 |
| HNRNPAB    | 0.5948 | 1.0909 | 0.7736 | 0.6391 | 0.7746 | 0.1121 |
| MRPL4      | 0.6674 | 0.9540 | 0.7750 | 0.7021 | 0.7746 | 0.0638 |
| SMUG1      | 0.7090 | 0.9188 | 0.8946 | 0.5765 | 0.7747 | 0.0810 |
| MRPS31     | 0.6151 | 0.9341 | 0.8866 | 0.6633 | 0.7748 | 0.0795 |
| ABHD11     | 0.6570 | 0.9183 | 0.8391 | 0.6847 | 0.7748 | 0.0624 |
| EIF2A      | 0.5872 | 1.0107 | 0.8491 | 0.6523 | 0.7748 | 0.0963 |
| LOC1001300 | 0.6460 | 0.9487 | 0.8854 | 0.6192 | 0.7748 | 0.0833 |
| RPF2       | 0.5738 | 0.8921 | 0.9884 | 0.6451 | 0.7748 | 0.0986 |
| TRIM37     | 0.6661 | 0.9506 | 0.7614 | 0.7214 | 0.7749 | 0.0618 |
| SLC35A4    | 0.5852 | 1.1698 | 0.7001 | 0.6446 | 0.7749 | 0.1337 |
| KIAA0367   | 0.7173 | 0.9809 | 0.7440 | 0.6577 | 0.7750 | 0.0710 |
| WDR8       | 0.6357 | 0.9760 | 0.8177 | 0.6705 | 0.7750 | 0.0778 |
| TGIF1      | 0.6302 | 0.9918 | 0.7707 | 0.7076 | 0.7750 | 0.0777 |
| DPP3       | 0.7061 | 0.9609 | 0.7655 | 0.6678 | 0.7751 | 0.0651 |
| KBTBD11    | 0.6754 | 1.0535 | 0.7214 | 0.6503 | 0.7751 | 0.0940 |
| FAM83H     | 0.7150 | 1.0064 | 0.6906 | 0.6887 | 0.7752 | 0.0773 |
| TMEM218    | 0.6360 | 0.9504 | 0.8904 | 0.6239 | 0.7752 | 0.0848 |
| TSSC1      | 0.6750 | 1.0854 | 0.7955 | 0.5449 | 0.7752 | 0.1154 |
| IFIH1      | 0.6539 | 0.9106 | 0.8438 | 0.6926 | 0.7752 | 0.0609 |
| SLC39A14   | 0.6845 | 1.0198 | 0.7654 | 0.6314 | 0.7753 | 0.0860 |
| LOC728666  | 0.5261 | 1.1391 | 0.8254 | 0.6110 | 0.7754 | 0.1366 |
| LOC1001323 | 0.6118 | 0.9742 | 0.7397 | 0.7761 | 0.7754 | 0.0750 |
| TEAD2      | 0.7609 | 0.9877 | 0.6410 | 0.7123 | 0.7755 | 0.0749 |
| CKAP2      | 0.6128 | 1.0575 | 0.7418 | 0.6898 | 0.7755 | 0.0977 |
| SLC37A3    | 0.6666 | 1.0819 | 0.6747 | 0.6789 | 0.7755 | 0.1022 |
| C1orf163   | 0.5885 | 0.9986 | 0.8729 | 0.6422 | 0.7756 | 0.0966 |
| WDR74      | 0.6419 | 0.9893 | 0.8310 | 0.6409 | 0.7758 | 0.0840 |
| DEPDC1     | 0.6440 | 0.9170 | 0.8276 | 0.7146 | 0.7758 | 0.0604 |
| POLD3      | 0.6721 | 0.8970 | 0.7573 | 0.7769 | 0.7758 | 0.0464 |
| ALG10B     | 0.6621 | 0.9438 | 0.7785 | 0.7189 | 0.7758 | 0.0608 |
| ZNF207     | 0.5838 | 1.0337 | 0.8308 | 0.6551 | 0.7759 | 0.1004 |
| LARS2      | 0.6731 | 1.0410 | 0.7890 | 0.6006 | 0.7759 | 0.0965 |
| KRTCAP3    | 0.5516 | 0.9730 | 0.9559 | 0.6237 | 0.7761 | 0.1098 |
| FJX1       | 0.5792 | 0.9207 | 0.8761 | 0.7289 | 0.7762 | 0.0774 |
| MRPL45     | 0.6042 | 0.9745 | 0.9236 | 0.6029 | 0.7763 | 0.1003 |
| ZNF395     | 0.7654 | 0.9566 | 0.6762 | 0.7073 | 0.7764 | 0.0629 |
| TUSC4      | 0.6185 | 0.9972 | 0.8333 | 0.6565 | 0.7764 | 0.0872 |
| HERC3      | 0.5927 | 1.0981 | 0.7404 | 0.6745 | 0.7764 | 0.1114 |
| FLAD1      | 0.6887 | 0.9366 | 0.8020 | 0.6784 | 0.7764 | 0.0603 |
| ZFYVE19    | 0.6753 | 1.0372 | 0.7661 | 0.6273 | 0.7765 | 0.0916 |
| ABHD8      | 0.5738 | 1.1459 | 0.6785 | 0.7081 | 0.7766 | 0.1264 |
| C1orf19    | 0.6919 | 0.9490 | 0.8551 | 0.6106 | 0.7766 | 0.0767 |
| TM2D1      | 0.6753 | 1.0135 | 0.8411 | 0.5769 | 0.7767 | 0.0959 |
| LOC1001288 | 0.6640 | 0.8697 | 0.7153 | 0.8580 | 0.7768 | 0.0514 |
| MPV17L     | 0.7352 | 0.8392 | 0.8550 | 0.6778 | 0.7768 | 0.0424 |

|           |        |        |        |        |        |        |
|-----------|--------|--------|--------|--------|--------|--------|
| AGK       | 0.5908 | 1.0036 | 0.8473 | 0.6657 | 0.7769 | 0.0928 |
| ZNF282    | 0.7561 | 0.9075 | 0.8086 | 0.6353 | 0.7769 | 0.0567 |
| NAV1      | 0.6506 | 0.9954 | 0.6992 | 0.7624 | 0.7769 | 0.0763 |
| NEIL3     | 0.7406 | 0.8302 | 0.7895 | 0.7473 | 0.7769 | 0.0208 |
| CHRNA5    | 0.6114 | 0.9528 | 0.8558 | 0.6876 | 0.7769 | 0.0778 |
| BRCC3     | 0.6991 | 0.8838 | 0.8315 | 0.6933 | 0.7769 | 0.0478 |
| BUD31     | 0.6375 | 1.0079 | 0.8238 | 0.6385 | 0.7769 | 0.0886 |
| TEX10     | 0.5944 | 1.0423 | 0.8274 | 0.6438 | 0.7770 | 0.1017 |
| LOC645015 | 0.6199 | 0.9429 | 0.8881 | 0.6571 | 0.7770 | 0.0811 |
| RRP15     | 0.5369 | 1.0229 | 0.9382 | 0.6101 | 0.7770 | 0.1197 |
| PELP1     | 0.6975 | 0.9039 | 0.8675 | 0.6396 | 0.7771 | 0.0642 |
| C19orf6   | 0.7335 | 0.9808 | 0.7325 | 0.6621 | 0.7772 | 0.0699 |
| PSME3     | 0.6233 | 0.9839 | 0.8701 | 0.6317 | 0.7772 | 0.0895 |
| RPA1      | 0.6294 | 1.0315 | 0.7900 | 0.6584 | 0.7773 | 0.0917 |
| NRAS      | 0.6377 | 0.9990 | 0.8128 | 0.6598 | 0.7773 | 0.0835 |
| RAVER2    | 0.8246 | 0.8681 | 0.6742 | 0.7431 | 0.7775 | 0.0431 |
| TRMT112   | 0.6457 | 1.0099 | 0.8002 | 0.6543 | 0.7775 | 0.0852 |
| CHCHD8    | 0.4852 | 1.1120 | 0.8403 | 0.6728 | 0.7776 | 0.1330 |
| CAPRIN1   | 0.6193 | 1.0434 | 0.7758 | 0.6720 | 0.7776 | 0.0944 |
| LOC729680 | 0.6123 | 0.9305 | 0.8949 | 0.6729 | 0.7776 | 0.0793 |
| C19orf42  | 0.6173 | 1.0767 | 0.7509 | 0.6658 | 0.7776 | 0.1034 |
| MAPKAP1   | 0.6689 | 1.0185 | 0.7848 | 0.6385 | 0.7777 | 0.0862 |
| ZNF581    | 0.6603 | 1.0325 | 0.7316 | 0.6866 | 0.7778 | 0.0862 |
| NUDC      | 0.6227 | 1.0570 | 0.8274 | 0.6044 | 0.7779 | 0.1059 |
| ACY1      | 0.6247 | 1.0172 | 0.7903 | 0.6796 | 0.7779 | 0.0869 |
| YTHDF2    | 0.6937 | 0.9110 | 0.8500 | 0.6573 | 0.7780 | 0.0609 |
| SPR       | 0.6916 | 0.9709 | 0.8014 | 0.6481 | 0.7780 | 0.0719 |
| SBF2      | 0.6859 | 0.9697 | 0.7982 | 0.6583 | 0.7780 | 0.0707 |
| LOC645233 | 0.6539 | 0.9622 | 0.8996 | 0.5965 | 0.7781 | 0.0900 |
| UCHL5IP   | 0.6679 | 0.9371 | 0.8446 | 0.6627 | 0.7781 | 0.0678 |
| FAM81A    | 0.6598 | 0.9309 | 0.8784 | 0.6432 | 0.7781 | 0.0739 |
| RAB8B     | 0.8140 | 0.8785 | 0.8136 | 0.6062 | 0.7781 | 0.0593 |
| NIP7      | 0.5772 | 1.0030 | 0.9372 | 0.5951 | 0.7781 | 0.1117 |
| ADH5      | 0.8056 | 1.0387 | 0.6047 | 0.6634 | 0.7781 | 0.0966 |
| PSMB3     | 0.6304 | 1.0959 | 0.7111 | 0.6750 | 0.7781 | 0.1072 |
| EPRS      | 0.7195 | 0.9855 | 0.8206 | 0.5881 | 0.7784 | 0.0838 |
| HCCS      | 0.6593 | 0.8437 | 0.8913 | 0.7194 | 0.7784 | 0.0537 |
| BCS1L     | 0.5915 | 1.0271 | 0.8229 | 0.6722 | 0.7784 | 0.0958 |
| QTRTD1    | 0.7034 | 0.9824 | 0.7933 | 0.6348 | 0.7785 | 0.0753 |
| PRPS2     | 0.6251 | 1.0148 | 0.7748 | 0.6995 | 0.7785 | 0.0845 |
| RRP9      | 0.6999 | 0.9258 | 0.7585 | 0.7304 | 0.7786 | 0.0505 |
| RBM22     | 0.6340 | 1.0366 | 0.7659 | 0.6785 | 0.7787 | 0.0902 |
| KIAA1524  | 0.5951 | 0.8469 | 0.8237 | 0.8496 | 0.7788 | 0.0615 |
| C17orf79  | 0.5211 | 1.2007 | 0.7527 | 0.6409 | 0.7789 | 0.1483 |
| RHOQ      | 0.5695 | 1.0302 | 0.8039 | 0.7122 | 0.7790 | 0.0966 |
| FBXO21    | 0.6330 | 1.0344 | 0.7590 | 0.6895 | 0.7790 | 0.0890 |

|           |        |        |        |        |        |        |
|-----------|--------|--------|--------|--------|--------|--------|
| LOC648695 | 0.5616 | 1.0716 | 0.8517 | 0.6311 | 0.7790 | 0.1155 |
| KCTD6     | 0.6408 | 0.8914 | 0.8811 | 0.7029 | 0.7790 | 0.0632 |
| UTP18     | 0.8265 | 0.9005 | 0.8032 | 0.5865 | 0.7792 | 0.0675 |
| POLA1     | 0.6643 | 0.9414 | 0.7411 | 0.7701 | 0.7793 | 0.0585 |
| PES1      | 0.6035 | 0.9662 | 0.9081 | 0.6394 | 0.7793 | 0.0922 |
| MGST3     | 0.6316 | 1.1951 | 0.7548 | 0.5358 | 0.7793 | 0.1456 |
| SLCO5A1   | 0.7490 | 0.8755 | 0.7369 | 0.7561 | 0.7794 | 0.0323 |
| LMNB2     | 0.5780 | 1.2195 | 0.7172 | 0.6031 | 0.7794 | 0.1498 |
| TMEM208   | 0.6520 | 1.0679 | 0.8199 | 0.5780 | 0.7794 | 0.1087 |
| MID1IP1   | 0.7429 | 0.9027 | 0.8446 | 0.6277 | 0.7795 | 0.0604 |
| FAM50A    | 0.6938 | 1.0837 | 0.7804 | 0.5603 | 0.7795 | 0.1110 |
| DNLZ      | 0.6401 | 1.1839 | 0.7734 | 0.5208 | 0.7795 | 0.1443 |
| PPAN      | 0.6402 | 1.0086 | 0.7400 | 0.7297 | 0.7796 | 0.0796 |
| GNPNAT1   | 0.7148 | 0.9280 | 0.8283 | 0.6477 | 0.7797 | 0.0619 |
| PEX11B    | 0.6903 | 1.1050 | 0.6904 | 0.6341 | 0.7800 | 0.1091 |
| GNB1L     | 0.5658 | 1.1838 | 0.7595 | 0.6109 | 0.7800 | 0.1408 |
| CHPT1     | 0.7065 | 1.0381 | 0.7834 | 0.5922 | 0.7801 | 0.0946 |
| NDUFA6    | 0.6265 | 1.0057 | 0.8731 | 0.6151 | 0.7801 | 0.0959 |
| PYRL      | 0.6410 | 0.8907 | 0.8423 | 0.7466 | 0.7801 | 0.0552 |
| CLCC1     | 0.7052 | 0.8841 | 0.7740 | 0.7575 | 0.7802 | 0.0376 |
| LOC389322 | 0.6761 | 0.9518 | 0.8987 | 0.5948 | 0.7804 | 0.0860 |
| SHQ1      | 0.6128 | 1.0552 | 0.7979 | 0.6569 | 0.7807 | 0.0996 |
| DCAF16    | 0.5398 | 1.0214 | 0.8344 | 0.7277 | 0.7808 | 0.1007 |
| TUBB2C    | 0.5773 | 0.9902 | 0.9119 | 0.6439 | 0.7808 | 0.1005 |
| PSMA2     | 0.5967 | 0.8916 | 0.8873 | 0.7481 | 0.7809 | 0.0699 |
| WDR79     | 0.6438 | 0.9339 | 0.8925 | 0.6536 | 0.7810 | 0.0768 |
| C19orf70  | 0.5546 | 1.0693 | 0.8710 | 0.6290 | 0.7810 | 0.1175 |
| LMAN2L    | 0.6656 | 1.0892 | 0.7699 | 0.5993 | 0.7810 | 0.1086 |
| HELLS     | 0.6100 | 0.9927 | 0.8215 | 0.6999 | 0.7810 | 0.0828 |
| UQCRFS1   | 0.6481 | 1.0333 | 0.9138 | 0.5290 | 0.7810 | 0.1163 |
| HIST1H3F  | 0.5542 | 1.2150 | 0.7396 | 0.6155 | 0.7811 | 0.1497 |
| TAF5      | 0.6405 | 0.9224 | 0.7594 | 0.8020 | 0.7811 | 0.0582 |
| C6orf111  | 0.6617 | 0.9913 | 0.7417 | 0.7297 | 0.7811 | 0.0723 |
| JPH1      | 0.5493 | 1.0095 | 0.8532 | 0.7125 | 0.7811 | 0.0982 |
| PLEKHN1   | 0.7629 | 0.8350 | 0.7395 | 0.7871 | 0.7811 | 0.0204 |
| KLF11     | 0.6166 | 1.0239 | 0.7980 | 0.6863 | 0.7812 | 0.0891 |
| DRG1      | 0.5983 | 1.0024 | 0.8900 | 0.6345 | 0.7813 | 0.0982 |
| CMTM4     | 0.6373 | 1.0637 | 0.7234 | 0.7016 | 0.7815 | 0.0958 |
| CHCHD4    | 0.5552 | 1.1044 | 0.8349 | 0.6316 | 0.7815 | 0.1228 |
| LOC653119 | 0.6451 | 0.9841 | 0.8046 | 0.6926 | 0.7816 | 0.0753 |
| NUPL2     | 0.6233 | 1.0929 | 0.7578 | 0.6529 | 0.7817 | 0.1077 |
| MPHOSPH9  | 0.6707 | 0.9878 | 0.7706 | 0.6979 | 0.7817 | 0.0718 |
| SUSD2     | 0.7618 | 1.0321 | 0.6819 | 0.6512 | 0.7817 | 0.0866 |
| NUDT6     | 0.6621 | 1.0456 | 0.7874 | 0.6321 | 0.7818 | 0.0941 |
| CARM1     | 0.7203 | 1.0406 | 0.7009 | 0.6654 | 0.7818 | 0.0870 |
| GEMIN6    | 0.5300 | 1.1571 | 0.8094 | 0.6307 | 0.7818 | 0.1378 |

|            |        |        |        |        |        |        |
|------------|--------|--------|--------|--------|--------|--------|
| UBE2Q1     | 0.7180 | 0.9683 | 0.7959 | 0.6451 | 0.7819 | 0.0694 |
| NUDT11     | 0.7478 | 0.8889 | 0.7912 | 0.6996 | 0.7819 | 0.0403 |
| MTX1       | 0.6441 | 1.0496 | 0.7895 | 0.6445 | 0.7819 | 0.0956 |
| DCTD       | 0.5744 | 1.1302 | 0.7906 | 0.6325 | 0.7819 | 0.1247 |
| RBM39      | 0.7046 | 0.9803 | 0.8120 | 0.6311 | 0.7820 | 0.0758 |
| SNORD31    | 0.6538 | 1.0009 | 0.7105 | 0.7628 | 0.7820 | 0.0763 |
| ATAD3A     | 0.5831 | 1.1487 | 0.7449 | 0.6516 | 0.7821 | 0.1266 |
| SNORD80    | 0.7452 | 0.8734 | 0.7972 | 0.7126 | 0.7821 | 0.0351 |
| TMED4      | 0.5659 | 1.1684 | 0.8052 | 0.5891 | 0.7821 | 0.1396 |
| ABHD14A    | 0.6393 | 1.0067 | 0.8022 | 0.6806 | 0.7822 | 0.0824 |
| LOC440498  | 0.6515 | 1.0780 | 0.7877 | 0.6117 | 0.7822 | 0.1055 |
| SFRS8      | 0.7476 | 0.9324 | 0.7839 | 0.6657 | 0.7824 | 0.0558 |
| LOC730052  | 0.6078 | 0.9799 | 0.9178 | 0.6244 | 0.7825 | 0.0970 |
| DOHH       | 0.7185 | 0.9680 | 0.8430 | 0.6007 | 0.7825 | 0.0792 |
| HSPE1      | 0.7098 | 0.9520 | 0.9313 | 0.5374 | 0.7826 | 0.0984 |
| C5orf54    | 0.6539 | 1.0370 | 0.7671 | 0.6727 | 0.7827 | 0.0883 |
| PLS3       | 0.6742 | 0.9628 | 0.8387 | 0.6553 | 0.7828 | 0.0728 |
| CEP135     | 0.7436 | 0.9444 | 0.7570 | 0.6867 | 0.7829 | 0.0559 |
| PTPN3      | 0.6639 | 0.9677 | 0.7766 | 0.7236 | 0.7830 | 0.0657 |
| LOC441019  | 0.6865 | 0.8802 | 0.8060 | 0.7595 | 0.7830 | 0.0407 |
| SLC25A11   | 0.6704 | 0.9927 | 0.8617 | 0.6077 | 0.7831 | 0.0883 |
| SC65       | 0.6205 | 1.0036 | 0.8866 | 0.6219 | 0.7831 | 0.0965 |
| SRBD1      | 0.6607 | 0.9937 | 0.8147 | 0.6636 | 0.7832 | 0.0788 |
| ISG15      | 0.6347 | 1.0910 | 0.7314 | 0.6758 | 0.7832 | 0.1045 |
| TFAM       | 0.6309 | 0.9704 | 0.8178 | 0.7142 | 0.7833 | 0.0731 |
| SNORA6     | 0.6243 | 1.1740 | 0.7235 | 0.6114 | 0.7833 | 0.1326 |
| ST6GALNAC6 | 0.6256 | 0.9822 | 0.7791 | 0.7466 | 0.7834 | 0.0741 |
| ZNHIT2     | 0.6898 | 1.0199 | 0.8150 | 0.6088 | 0.7834 | 0.0895 |
| VPS52      | 0.7257 | 0.9973 | 0.7544 | 0.6562 | 0.7834 | 0.0742 |
| LYPLA2     | 0.7164 | 1.0137 | 0.7136 | 0.6901 | 0.7834 | 0.0770 |
| C5orf25    | 0.7194 | 0.8913 | 0.7706 | 0.7527 | 0.7835 | 0.0375 |
| PTCD2      | 0.6176 | 1.0267 | 0.8454 | 0.6451 | 0.7837 | 0.0956 |
| PRPF3      | 0.5576 | 1.1454 | 0.6932 | 0.7387 | 0.7837 | 0.1265 |
| RBM28      | 0.7552 | 0.8795 | 0.7134 | 0.7877 | 0.7839 | 0.0353 |
| LOC221710  | 0.6617 | 0.8053 | 0.8996 | 0.7693 | 0.7840 | 0.0492 |
| LCLAT1     | 0.6767 | 0.9843 | 0.8379 | 0.6369 | 0.7840 | 0.0797 |
| MRPS14     | 0.6326 | 1.0629 | 0.7785 | 0.6622 | 0.7840 | 0.0981 |
| TMEM143    | 0.7339 | 0.8214 | 0.8015 | 0.7795 | 0.7841 | 0.0188 |
| PHB2       | 0.5106 | 1.1098 | 0.8892 | 0.6269 | 0.7841 | 0.1344 |
| STK24      | 0.6941 | 1.0495 | 0.7605 | 0.6326 | 0.7842 | 0.0922 |
| SF3B5      | 0.6276 | 1.0968 | 0.8385 | 0.5741 | 0.7842 | 0.1188 |
| ULBP1      | 0.7886 | 0.9200 | 0.6751 | 0.7532 | 0.7842 | 0.0511 |
| SLC25A40   | 0.6418 | 0.9675 | 0.8107 | 0.7172 | 0.7843 | 0.0702 |
| NME6       | 0.7220 | 0.8835 | 0.8275 | 0.7043 | 0.7843 | 0.0428 |
| SLC7A11    | 0.8384 | 0.8497 | 0.6776 | 0.7717 | 0.7843 | 0.0395 |
| CDH15      | 0.7061 | 0.8982 | 0.7613 | 0.7721 | 0.7845 | 0.0406 |

|            |        |        |        |        |        |        |
|------------|--------|--------|--------|--------|--------|--------|
| PRKAR1B    | 0.7000 | 1.0124 | 0.7821 | 0.6435 | 0.7845 | 0.0811 |
| MRPS7      | 0.6010 | 1.0509 | 0.8207 | 0.6654 | 0.7845 | 0.1001 |
| CEP192     | 0.6677 | 0.9346 | 0.7798 | 0.7561 | 0.7846 | 0.0555 |
| CCDC76     | 0.6669 | 1.0364 | 0.6826 | 0.7525 | 0.7846 | 0.0860 |
| BAT1       | 0.5611 | 1.1026 | 0.8148 | 0.6599 | 0.7846 | 0.1182 |
| LOC729535  | 0.4840 | 1.0509 | 0.8509 | 0.7530 | 0.7847 | 0.1179 |
| EML4       | 0.7975 | 0.9693 | 0.7258 | 0.6464 | 0.7847 | 0.0688 |
| GAS8       | 0.7343 | 0.9960 | 0.6978 | 0.7110 | 0.7848 | 0.0708 |
| PSMA1      | 0.6223 | 1.0612 | 0.8211 | 0.6345 | 0.7848 | 0.1028 |
| BCKDK      | 0.6934 | 1.0617 | 0.7011 | 0.6835 | 0.7849 | 0.0923 |
| DDX10      | 0.5586 | 1.0364 | 0.8242 | 0.7207 | 0.7850 | 0.1001 |
| C20orf7    | 0.6446 | 0.8963 | 0.9575 | 0.6420 | 0.7851 | 0.0828 |
| GAGE2A     | 0.6013 | 1.0297 | 0.9323 | 0.5772 | 0.7851 | 0.1149 |
| LOC644762  | 0.5106 | 1.2693 | 0.8295 | 0.5313 | 0.7852 | 0.1771 |
| GNAI3      | 0.6934 | 0.8529 | 0.9189 | 0.6759 | 0.7853 | 0.0597 |
| LOC1001319 | 0.6207 | 1.0412 | 0.8456 | 0.6340 | 0.7854 | 0.0996 |
| SFRS17A    | 0.6604 | 0.9643 | 0.8086 | 0.7083 | 0.7854 | 0.0672 |
| LOC729768  | 0.5558 | 1.0930 | 0.8548 | 0.6380 | 0.7854 | 0.1204 |
| SIX4       | 0.5410 | 1.1415 | 0.7626 | 0.6966 | 0.7854 | 0.1274 |
| PPP2R4     | 0.6335 | 0.9983 | 0.8604 | 0.6496 | 0.7855 | 0.0878 |
| PINX1      | 0.6208 | 1.0289 | 0.7894 | 0.7029 | 0.7855 | 0.0881 |
| AMY1C      | 0.5689 | 0.8642 | 1.0191 | 0.6897 | 0.7855 | 0.0987 |
| PAK1       | 0.6551 | 1.0351 | 0.7964 | 0.6556 | 0.7855 | 0.0896 |
| IFITM2     | 0.7355 | 1.0315 | 0.7969 | 0.5784 | 0.7856 | 0.0940 |
| POP1       | 0.6003 | 1.0011 | 0.7898 | 0.7512 | 0.7856 | 0.0827 |
| FAM58A     | 0.6009 | 1.0230 | 0.8469 | 0.6719 | 0.7856 | 0.0945 |
| SRXN1      | 0.7238 | 1.0736 | 0.7741 | 0.5713 | 0.7857 | 0.1052 |
| TXN2       | 0.7347 | 1.0149 | 0.7822 | 0.6111 | 0.7857 | 0.0845 |
| TIMP2      | 0.8045 | 0.9114 | 0.7559 | 0.6712 | 0.7858 | 0.0501 |
| PPARBP     | 0.6121 | 0.9118 | 0.8756 | 0.7439 | 0.7858 | 0.0682 |
| LOC1001344 | 0.6684 | 0.9736 | 0.8638 | 0.6379 | 0.7859 | 0.0801 |
| FREQ       | 0.6792 | 1.0248 | 0.7070 | 0.7329 | 0.7860 | 0.0804 |
| EIF2B5     | 0.7298 | 1.0363 | 0.7174 | 0.6606 | 0.7860 | 0.0848 |
| NRGN       | 0.6847 | 0.8368 | 0.8286 | 0.7940 | 0.7860 | 0.0350 |
| PSMD1      | 0.7046 | 0.9959 | 0.7870 | 0.6568 | 0.7861 | 0.0749 |
| ITPKA      | 0.7874 | 0.9194 | 0.7948 | 0.6428 | 0.7861 | 0.0565 |
| C8orf76    | 0.6004 | 1.0834 | 0.8392 | 0.6217 | 0.7862 | 0.1128 |
| ACTR5      | 0.6875 | 0.9626 | 0.7438 | 0.7510 | 0.7862 | 0.0605 |
| RIF1       | 0.6395 | 0.9435 | 0.8352 | 0.7267 | 0.7862 | 0.0660 |
| MAST3      | 0.7111 | 0.9547 | 0.7127 | 0.7669 | 0.7863 | 0.0576 |
| DCLRE1A    | 0.7350 | 0.9242 | 0.8977 | 0.5886 | 0.7864 | 0.0781 |
| HOXB13     | 0.7249 | 1.0571 | 0.7502 | 0.6136 | 0.7864 | 0.0950 |
| SNUPN      | 0.7756 | 0.9400 | 0.7902 | 0.6401 | 0.7865 | 0.0613 |
| C12orf31   | 0.5754 | 1.0318 | 0.8732 | 0.6658 | 0.7866 | 0.1028 |
| LOC729217  | 0.5694 | 1.2063 | 0.7645 | 0.6062 | 0.7866 | 0.1462 |
| PDIA6      | 0.5538 | 1.1725 | 0.7065 | 0.7135 | 0.7866 | 0.1338 |

|            |        |        |        |        |        |        |
|------------|--------|--------|--------|--------|--------|--------|
| SLC2A6     | 0.6327 | 1.0282 | 0.7984 | 0.6872 | 0.7866 | 0.0876 |
| SS18L2     | 0.6046 | 0.9881 | 0.8669 | 0.6871 | 0.7867 | 0.0866 |
| LOC1001330 | 0.7449 | 0.8063 | 0.8883 | 0.7080 | 0.7869 | 0.0394 |
| SLC27A2    | 0.6626 | 1.0285 | 0.8220 | 0.6345 | 0.7869 | 0.0905 |
| GNB5       | 0.7115 | 0.9568 | 0.7676 | 0.7119 | 0.7869 | 0.0581 |
| HIP2       | 0.5438 | 1.0053 | 0.9190 | 0.6799 | 0.7870 | 0.1063 |
| CWF19L1    | 0.6273 | 1.1147 | 0.7669 | 0.6392 | 0.7870 | 0.1137 |
| LOC1001322 | 0.7397 | 0.7847 | 0.9544 | 0.6694 | 0.7871 | 0.0606 |
| LOC400013  | 0.6068 | 1.1240 | 0.8138 | 0.6038 | 0.7871 | 0.1226 |
| C21orf51   | 0.6781 | 1.0377 | 0.7171 | 0.7155 | 0.7871 | 0.0840 |
| PPA1       | 0.5579 | 1.1298 | 0.8434 | 0.6182 | 0.7873 | 0.1296 |
| UBA6       | 0.6880 | 0.8903 | 0.9677 | 0.6039 | 0.7875 | 0.0850 |
| VPS35      | 0.6493 | 0.9398 | 0.8969 | 0.6639 | 0.7875 | 0.0761 |
| PTPN2      | 0.6664 | 0.9303 | 0.8416 | 0.7119 | 0.7876 | 0.0603 |
| GAS2L3     | 0.6223 | 0.9036 | 0.8194 | 0.8050 | 0.7876 | 0.0592 |
| EIF2C2     | 0.6359 | 1.1292 | 0.6896 | 0.6958 | 0.7876 | 0.1147 |
| C5orf22    | 0.6086 | 0.8751 | 0.9878 | 0.6798 | 0.7878 | 0.0873 |
| ORAI1      | 0.6214 | 0.8838 | 0.7532 | 0.8938 | 0.7880 | 0.0641 |
| LITAF      | 0.6263 | 0.9260 | 0.9250 | 0.6749 | 0.7881 | 0.0800 |
| NAPG       | 0.6907 | 1.0350 | 0.7724 | 0.6543 | 0.7881 | 0.0859 |
| TATDN2     | 0.6357 | 1.0239 | 0.8795 | 0.6137 | 0.7882 | 0.0990 |
| WSB1       | 0.6897 | 0.9730 | 0.7898 | 0.7003 | 0.7882 | 0.0656 |
| MAPRE1     | 0.6298 | 1.0933 | 0.8800 | 0.5496 | 0.7882 | 0.1237 |
| LOC730358  | 0.5746 | 1.1886 | 0.7871 | 0.6027 | 0.7882 | 0.1415 |
| DHODH      | 0.6370 | 1.0193 | 0.8109 | 0.6858 | 0.7882 | 0.0853 |
| AP4M1      | 0.7647 | 0.8017 | 0.7850 | 0.8019 | 0.7883 | 0.0088 |
| TERF2      | 0.6717 | 1.1953 | 0.6932 | 0.5935 | 0.7884 | 0.1373 |
| NOL7       | 0.6425 | 1.0480 | 0.7703 | 0.6933 | 0.7885 | 0.0904 |
| LOC653479  | 0.6012 | 1.1533 | 0.8064 | 0.5935 | 0.7886 | 0.1312 |
| SNX12      | 0.7224 | 1.0364 | 0.7623 | 0.6339 | 0.7887 | 0.0868 |
| DCUN1D5    | 0.6189 | 0.9868 | 0.8594 | 0.6900 | 0.7888 | 0.0831 |
| PITRM1     | 0.6439 | 1.0599 | 0.8042 | 0.6470 | 0.7888 | 0.0978 |
| ZFAND1     | 0.6405 | 1.0357 | 0.8305 | 0.6487 | 0.7889 | 0.0932 |
| C13orf34   | 0.6553 | 0.9070 | 0.7467 | 0.8465 | 0.7889 | 0.0555 |
| C11orf73   | 0.6341 | 1.0838 | 0.7367 | 0.7010 | 0.7889 | 0.1006 |
| CBX3       | 0.5565 | 1.1041 | 0.7463 | 0.7489 | 0.7889 | 0.1143 |
| KISS1R     | 0.7647 | 0.9474 | 0.7493 | 0.6946 | 0.7890 | 0.0549 |
| GNA13      | 0.7685 | 0.9449 | 0.7602 | 0.6825 | 0.7890 | 0.0554 |
| ANAPC1     | 0.7389 | 1.0224 | 0.6914 | 0.7036 | 0.7891 | 0.0784 |
| PDCD4      | 0.6921 | 1.0281 | 0.8126 | 0.6234 | 0.7891 | 0.0888 |
| MUTYH      | 0.5989 | 1.1483 | 0.7808 | 0.6291 | 0.7893 | 0.1261 |
| RBM15      | 0.6806 | 1.0459 | 0.7564 | 0.6744 | 0.7893 | 0.0875 |
| LOC400455  | 0.5668 | 1.0948 | 0.9044 | 0.5914 | 0.7893 | 0.1276 |
| GOLPH4     | 0.4951 | 1.0387 | 0.9325 | 0.6915 | 0.7894 | 0.1221 |
| KIAA1430   | 0.6852 | 0.9999 | 0.7684 | 0.7048 | 0.7896 | 0.0723 |
| GAGE12B    | 0.6607 | 0.9973 | 1.0093 | 0.4910 | 0.7896 | 0.1282 |

|            |        |        |        |        |        |        |
|------------|--------|--------|--------|--------|--------|--------|
| CENPQ      | 0.7290 | 0.8950 | 0.8849 | 0.6495 | 0.7896 | 0.0602 |
| HNRNPA2B1  | 0.6242 | 1.0796 | 0.8253 | 0.6293 | 0.7896 | 0.1074 |
| MORC2      | 0.6944 | 1.0358 | 0.7355 | 0.6930 | 0.7897 | 0.0826 |
| TRIM27     | 0.6557 | 1.0151 | 0.7502 | 0.7379 | 0.7897 | 0.0780 |
| ZIK1       | 0.7224 | 0.9994 | 0.7533 | 0.6839 | 0.7897 | 0.0713 |
| ZNF264     | 0.6296 | 1.0130 | 0.8261 | 0.6909 | 0.7899 | 0.0849 |
| VIL2       | 0.7358 | 0.9600 | 0.7643 | 0.6995 | 0.7899 | 0.0582 |
| CARHSP1    | 0.6733 | 1.1035 | 0.7443 | 0.6385 | 0.7899 | 0.1068 |
| SLC35B4    | 0.7545 | 0.8569 | 0.8085 | 0.7398 | 0.7899 | 0.0268 |
| C20orf24   | 0.6081 | 1.0767 | 0.8346 | 0.6404 | 0.7899 | 0.1079 |
| CEBPA      | 0.6947 | 1.0624 | 0.6965 | 0.7063 | 0.7900 | 0.0908 |
| RG9MTD1    | 0.6185 | 0.8883 | 1.0445 | 0.6090 | 0.7901 | 0.1067 |
| POMP       | 0.6146 | 1.0298 | 0.9152 | 0.6008 | 0.7901 | 0.1079 |
| C9orf123   | 0.6853 | 0.9306 | 0.8822 | 0.6623 | 0.7901 | 0.0680 |
| TAF4       | 0.6520 | 0.9289 | 0.9121 | 0.6676 | 0.7901 | 0.0754 |
| LOC643668  | 0.5716 | 1.1432 | 0.8013 | 0.6445 | 0.7901 | 0.1271 |
| EML3       | 0.7009 | 0.9435 | 0.8199 | 0.6963 | 0.7901 | 0.0586 |
| LOC651697  | 0.6159 | 1.0348 | 0.9200 | 0.5902 | 0.7902 | 0.1107 |
| UGT2B17    | 0.4790 | 1.1760 | 0.8649 | 0.6410 | 0.7902 | 0.1510 |
| XPO1       | 0.5824 | 1.0863 | 0.9014 | 0.5910 | 0.7903 | 0.1234 |
| FAM69A     | 0.6761 | 0.9288 | 0.8179 | 0.7386 | 0.7904 | 0.0545 |
| MXD3       | 0.6504 | 0.8580 | 0.8477 | 0.8053 | 0.7904 | 0.0480 |
| DUSP5      | 0.7415 | 0.9035 | 0.8024 | 0.7147 | 0.7905 | 0.0419 |
| WDR77      | 0.6725 | 1.0744 | 0.7955 | 0.6200 | 0.7906 | 0.1015 |
| LOC645762  | 0.7391 | 0.9517 | 0.8661 | 0.6057 | 0.7907 | 0.0755 |
| TMEM60     | 0.6550 | 0.9376 | 0.8849 | 0.6852 | 0.7907 | 0.0707 |
| LOC1001280 | 0.5396 | 1.2064 | 0.7806 | 0.6362 | 0.7907 | 0.1471 |
| NSUN5      | 0.6795 | 0.9633 | 0.8560 | 0.6643 | 0.7908 | 0.0721 |
| MT1G       | 0.7767 | 0.8003 | 0.7674 | 0.8191 | 0.7909 | 0.0117 |
| LOC647597  | 0.6293 | 1.1289 | 0.7080 | 0.6973 | 0.7909 | 0.1140 |
| ZC3H10     | 0.7795 | 0.8981 | 0.7860 | 0.7000 | 0.7909 | 0.0407 |
| TMEM106C   | 0.5317 | 1.0859 | 0.8842 | 0.6621 | 0.7910 | 0.1223 |
| ENO1       | 0.6688 | 0.9782 | 0.9040 | 0.6134 | 0.7911 | 0.0887 |
| LOC441484  | 0.6373 | 0.9489 | 0.9445 | 0.6338 | 0.7911 | 0.0898 |
| CASP3      | 0.6730 | 1.0358 | 0.7811 | 0.6748 | 0.7912 | 0.0854 |
| SPIRE1     | 0.6502 | 1.1139 | 0.7418 | 0.6588 | 0.7912 | 0.1095 |
| TIMM8A     | 0.6669 | 0.9721 | 0.9454 | 0.5806 | 0.7912 | 0.0984 |
| FTSJ1      | 0.6844 | 0.9043 | 0.9302 | 0.6461 | 0.7913 | 0.0734 |
| ZNF668     | 0.6644 | 1.0243 | 0.8251 | 0.6513 | 0.7913 | 0.0871 |
| LNPEP      | 0.6911 | 0.9003 | 0.8603 | 0.7139 | 0.7914 | 0.0522 |
| SUMO3      | 0.6228 | 1.0219 | 0.8319 | 0.6893 | 0.7915 | 0.0883 |
| ALG13      | 0.5749 | 1.0384 | 0.9043 | 0.6484 | 0.7915 | 0.1084 |
| BTN3A2     | 0.7003 | 0.9335 | 0.8036 | 0.7285 | 0.7915 | 0.0521 |
| LOC441455  | 0.7331 | 1.0741 | 0.6983 | 0.6608 | 0.7916 | 0.0953 |
| RPUSD4     | 0.6463 | 1.0571 | 0.8261 | 0.6368 | 0.7916 | 0.0986 |
| ZNF446     | 0.7101 | 1.0501 | 0.7693 | 0.6371 | 0.7916 | 0.0903 |

|           |        |        |        |        |        |        |
|-----------|--------|--------|--------|--------|--------|--------|
| BRCA1     | 0.7030 | 0.9588 | 0.7770 | 0.7280 | 0.7917 | 0.0578 |
| NOMO3     | 0.5855 | 1.0386 | 0.8931 | 0.6497 | 0.7917 | 0.1057 |
| C6orf66   | 0.5557 | 1.0341 | 0.8261 | 0.7513 | 0.7918 | 0.0989 |
| C3orf64   | 0.6877 | 0.8961 | 0.8391 | 0.7444 | 0.7918 | 0.0467 |
| BOLA1     | 0.6298 | 0.9101 | 0.8256 | 0.8018 | 0.7918 | 0.0588 |
| INTS3     | 0.6304 | 0.9922 | 0.8038 | 0.7414 | 0.7919 | 0.0758 |
| CEBPZ     | 0.6157 | 0.9003 | 0.9588 | 0.6929 | 0.7919 | 0.0819 |
| MEPCE     | 0.7529 | 0.9754 | 0.8269 | 0.6127 | 0.7920 | 0.0756 |
| RNASET2   | 0.6538 | 1.0226 | 0.8144 | 0.6771 | 0.7920 | 0.0846 |
| LOC723972 | 0.5666 | 0.9589 | 0.9121 | 0.7305 | 0.7920 | 0.0899 |
| NOP2      | 0.6549 | 1.0804 | 0.7989 | 0.6339 | 0.7920 | 0.1029 |
| ZMYND19   | 0.5803 | 1.1313 | 0.8273 | 0.6294 | 0.7920 | 0.1250 |
| ELK1      | 0.6163 | 1.0708 | 0.8291 | 0.6524 | 0.7922 | 0.1039 |
| LOC399748 | 0.7031 | 0.9559 | 0.8380 | 0.6721 | 0.7923 | 0.0654 |
| PDE12     | 0.7055 | 0.9276 | 0.7827 | 0.7534 | 0.7923 | 0.0478 |
| TRAPPC2L  | 0.7359 | 0.9972 | 0.8365 | 0.5999 | 0.7923 | 0.0837 |
| MRPS18B   | 0.5785 | 0.9869 | 0.9457 | 0.6583 | 0.7924 | 0.1021 |
| PON2      | 0.6636 | 1.0903 | 0.8459 | 0.5697 | 0.7924 | 0.1147 |
| SLC7A5    | 0.8522 | 0.8468 | 0.7103 | 0.7605 | 0.7924 | 0.0345 |
| C2orf47   | 0.6600 | 1.0231 | 0.9565 | 0.5305 | 0.7925 | 0.1177 |
| NCBP2     | 0.7688 | 0.9767 | 0.7338 | 0.6908 | 0.7925 | 0.0634 |
| LOC650515 | 0.6174 | 0.9768 | 0.8350 | 0.7410 | 0.7925 | 0.0759 |
| GYG2      | 0.6922 | 1.0518 | 0.7583 | 0.6679 | 0.7926 | 0.0885 |
| ZFP62     | 0.7629 | 0.9625 | 0.7369 | 0.7080 | 0.7926 | 0.0577 |
| POLE      | 0.7978 | 0.8279 | 0.6927 | 0.8519 | 0.7926 | 0.0351 |
| CD59      | 0.7137 | 0.9525 | 0.8215 | 0.6827 | 0.7926 | 0.0610 |
| MBTPS2    | 0.6824 | 1.0546 | 0.7462 | 0.6873 | 0.7926 | 0.0885 |
| NOL12     | 0.6658 | 0.9951 | 0.8148 | 0.6951 | 0.7927 | 0.0748 |
| C14orf93  | 0.7843 | 0.9529 | 0.7632 | 0.6706 | 0.7927 | 0.0588 |
| SPAG9     | 0.6689 | 0.9906 | 0.8257 | 0.6857 | 0.7927 | 0.0747 |
| SFPQ      | 0.7724 | 0.8442 | 0.9470 | 0.6080 | 0.7929 | 0.0713 |
| KANK2     | 0.7179 | 1.0880 | 0.7455 | 0.6203 | 0.7929 | 0.1020 |
| TRIM45    | 0.8464 | 0.8423 | 0.7462 | 0.7376 | 0.7931 | 0.0296 |
| POLDIP3   | 0.6484 | 1.0433 | 0.7907 | 0.6902 | 0.7931 | 0.0886 |
| DOLPP1    | 0.6002 | 1.1341 | 0.8171 | 0.6211 | 0.7931 | 0.1237 |
| LOC400657 | 0.6740 | 0.9262 | 0.8569 | 0.7155 | 0.7932 | 0.0591 |
| MEA1      | 0.7111 | 0.9104 | 0.8979 | 0.6535 | 0.7932 | 0.0652 |
| DTWD1     | 0.6755 | 0.9479 | 0.8809 | 0.6685 | 0.7932 | 0.0713 |
| HOMER2    | 0.7517 | 1.1502 | 0.7289 | 0.5424 | 0.7933 | 0.1279 |
| CES2      | 0.7201 | 0.9629 | 0.7754 | 0.7149 | 0.7933 | 0.0582 |
| ZNF326    | 0.6406 | 0.9376 | 0.8178 | 0.7790 | 0.7937 | 0.0612 |
| LYPLA1    | 0.4830 | 1.1296 | 0.9071 | 0.6553 | 0.7938 | 0.1418 |
| SNRPC     | 0.6561 | 1.1467 | 0.8014 | 0.5709 | 0.7938 | 0.1269 |
| LOC389137 | 0.7345 | 1.0239 | 0.7387 | 0.6784 | 0.7939 | 0.0779 |
| KCTD3     | 0.7045 | 1.0417 | 0.8155 | 0.6139 | 0.7939 | 0.0923 |
| DNAJC8    | 0.6526 | 0.9342 | 0.8594 | 0.7294 | 0.7939 | 0.0633 |



|            |        |        |        |        |        |        |
|------------|--------|--------|--------|--------|--------|--------|
| ITGAE      | 0.6194 | 1.0046 | 0.8526 | 0.6993 | 0.7940 | 0.0853 |
| SERPINB6   | 0.7527 | 0.9641 | 0.8189 | 0.6402 | 0.7940 | 0.0676 |
| DDX3X      | 0.7015 | 1.0032 | 0.8316 | 0.6398 | 0.7940 | 0.0804 |
| RECQL4     | 0.7397 | 0.9071 | 0.8138 | 0.7156 | 0.7940 | 0.0431 |
| CTSL1      | 0.5372 | 1.2072 | 0.8302 | 0.6016 | 0.7941 | 0.1514 |
| CMBL       | 0.5253 | 1.0109 | 1.0138 | 0.6263 | 0.7941 | 0.1277 |
| IFT74      | 0.7140 | 1.0077 | 0.7673 | 0.6875 | 0.7941 | 0.0731 |
| RRS1       | 0.5816 | 1.0884 | 0.8688 | 0.6380 | 0.7942 | 0.1161 |
| RFC2       | 0.7257 | 0.8704 | 0.8802 | 0.7006 | 0.7942 | 0.0471 |
| C12orf10   | 0.5875 | 1.0087 | 0.8719 | 0.7091 | 0.7943 | 0.0922 |
| WDR75      | 0.6560 | 0.9614 | 0.9387 | 0.6214 | 0.7944 | 0.0903 |
| WDR76      | 0.6537 | 0.9238 | 0.7891 | 0.8110 | 0.7944 | 0.0554 |
| C7orf25    | 0.7379 | 0.9818 | 0.7757 | 0.6824 | 0.7945 | 0.0653 |
| TSGA14     | 0.8054 | 0.8965 | 0.7904 | 0.6857 | 0.7945 | 0.0432 |
| LOC1001329 | 0.6106 | 0.9791 | 0.9819 | 0.6070 | 0.7947 | 0.1073 |
| CCDC110    | 0.6684 | 0.9592 | 0.8520 | 0.6991 | 0.7947 | 0.0680 |
| TMED2      | 0.6329 | 1.0846 | 0.8952 | 0.5662 | 0.7948 | 0.1199 |
| LOC645332  | 0.5991 | 1.0224 | 0.8016 | 0.7558 | 0.7948 | 0.0874 |
| VRK3       | 0.6999 | 0.9553 | 0.7802 | 0.7439 | 0.7948 | 0.0559 |
| SPG21      | 0.6278 | 1.1065 | 0.8181 | 0.6270 | 0.7949 | 0.1132 |
| HNRNPA0    | 0.6677 | 1.1306 | 0.7457 | 0.6356 | 0.7949 | 0.1143 |
| UBE2G2     | 0.6649 | 1.0070 | 0.7754 | 0.7324 | 0.7949 | 0.0743 |
| MTCP1      | 0.7440 | 0.9368 | 0.7677 | 0.7315 | 0.7950 | 0.0479 |
| GGCT       | 0.5987 | 1.0498 | 0.9544 | 0.5769 | 0.7950 | 0.1212 |
| PDCD6IP    | 0.6132 | 1.0527 | 0.8040 | 0.7101 | 0.7950 | 0.0943 |
| KIAA1147   | 0.5952 | 1.1077 | 0.8189 | 0.6583 | 0.7950 | 0.1144 |
| TBCD       | 0.7752 | 1.0440 | 0.7346 | 0.6264 | 0.7950 | 0.0887 |
| LOC729082  | 0.6102 | 1.0342 | 0.8125 | 0.7234 | 0.7951 | 0.0898 |
| RPA2       | 0.5997 | 1.1623 | 0.7785 | 0.6398 | 0.7951 | 0.1282 |
| RNASEH2B   | 0.7503 | 0.9181 | 0.8563 | 0.6556 | 0.7951 | 0.0580 |
| TUBB4Q     | 0.7370 | 0.7583 | 1.0199 | 0.6652 | 0.7951 | 0.0775 |
| VPS41      | 0.7090 | 0.9999 | 0.8160 | 0.6555 | 0.7951 | 0.0760 |
| G3BP1      | 0.6060 | 1.0611 | 0.7999 | 0.7138 | 0.7952 | 0.0971 |
| PTCD1      | 0.6701 | 1.0817 | 0.8173 | 0.6119 | 0.7953 | 0.1048 |
| C1orf43    | 0.6665 | 0.9616 | 0.8833 | 0.6698 | 0.7953 | 0.0751 |
| STAT1      | 0.6259 | 1.0819 | 0.8247 | 0.6487 | 0.7953 | 0.1054 |
| SNX13      | 0.7288 | 0.8956 | 0.8751 | 0.6817 | 0.7953 | 0.0530 |
| XPO6       | 0.6795 | 1.0325 | 0.7876 | 0.6820 | 0.7954 | 0.0829 |
| DDX47      | 0.5409 | 1.0813 | 0.8918 | 0.6678 | 0.7955 | 0.1198 |
| LOC399804  | 0.5712 | 1.1627 | 0.9110 | 0.5374 | 0.7956 | 0.1486 |
| PIGU       | 0.8346 | 0.8618 | 0.8070 | 0.6792 | 0.7956 | 0.0404 |
| UQCRHL     | 0.5878 | 1.0111 | 1.0443 | 0.5394 | 0.7956 | 0.1345 |
| ARID3A     | 0.6763 | 1.0312 | 0.6865 | 0.7885 | 0.7956 | 0.0825 |
| NCAPD3     | 0.8583 | 0.9262 | 0.7487 | 0.6498 | 0.7957 | 0.0608 |
| UBL7       | 0.6255 | 1.0089 | 0.8349 | 0.7136 | 0.7957 | 0.0830 |
| ST3GAL4    | 0.6752 | 0.9797 | 0.8027 | 0.7255 | 0.7958 | 0.0667 |

|            |        |        |        |        |        |        |
|------------|--------|--------|--------|--------|--------|--------|
| COPS5      | 0.5946 | 1.1399 | 0.8170 | 0.6323 | 0.7959 | 0.1245 |
| LOC651143  | 0.7149 | 1.0290 | 0.7748 | 0.6652 | 0.7960 | 0.0808 |
| WDSUB1     | 0.6902 | 0.9410 | 0.8493 | 0.7035 | 0.7960 | 0.0603 |
| S100BPB    | 0.6976 | 0.9763 | 0.7992 | 0.7109 | 0.7960 | 0.0642 |
| B4GALT2    | 0.7109 | 1.0378 | 0.7630 | 0.6725 | 0.7960 | 0.0827 |
| LOC1001282 | 0.8447 | 1.0178 | 0.7174 | 0.6046 | 0.7961 | 0.0887 |
| C16orf42   | 0.7223 | 0.8115 | 0.9438 | 0.7069 | 0.7961 | 0.0544 |
| TRPT1      | 0.6838 | 1.0056 | 0.8211 | 0.6742 | 0.7962 | 0.0775 |
| TTL        | 0.5932 | 1.1592 | 0.7706 | 0.6619 | 0.7962 | 0.1264 |
| LOC644334  | 0.6217 | 1.0498 | 0.8395 | 0.6745 | 0.7964 | 0.0964 |
| SYNCRIP    | 0.6702 | 0.9467 | 0.8697 | 0.6991 | 0.7964 | 0.0667 |
| TSTA3      | 0.8331 | 1.0067 | 0.7973 | 0.5487 | 0.7965 | 0.0944 |
| LOC1001303 | 0.7121 | 0.8707 | 0.9572 | 0.6468 | 0.7967 | 0.0712 |
| TAP2       | 0.5976 | 1.0265 | 0.7923 | 0.7706 | 0.7967 | 0.0881 |
| RPS6KA5    | 0.6701 | 0.9560 | 0.8536 | 0.7072 | 0.7967 | 0.0662 |
| CPT1A      | 0.6173 | 0.9816 | 0.8225 | 0.7661 | 0.7969 | 0.0753 |
| ALKBH2     | 0.5211 | 1.3291 | 0.6982 | 0.6394 | 0.7969 | 0.1812 |
| SMARCD2    | 0.6814 | 1.2232 | 0.7173 | 0.5659 | 0.7969 | 0.1457 |
| CSRP2BP    | 0.7449 | 0.9542 | 0.8265 | 0.6625 | 0.7970 | 0.0622 |
| C14orf80   | 0.6140 | 1.2146 | 0.7201 | 0.6395 | 0.7971 | 0.1410 |
| RSU1       | 0.7304 | 0.8504 | 0.8833 | 0.7242 | 0.7971 | 0.0409 |
| FAM90A3    | 0.6830 | 0.9191 | 0.8144 | 0.7720 | 0.7971 | 0.0490 |
| SCARNA10   | 0.6656 | 0.8955 | 0.8787 | 0.7487 | 0.7971 | 0.0548 |
| BID        | 0.7233 | 0.9370 | 0.8390 | 0.6895 | 0.7972 | 0.0565 |
| RPS6KA1    | 0.7773 | 0.9437 | 0.7357 | 0.7328 | 0.7974 | 0.0498 |
| BLVRA      | 0.6514 | 0.9828 | 0.9760 | 0.5799 | 0.7975 | 0.1060 |
| SLC22A23   | 0.6701 | 0.9958 | 0.7911 | 0.7333 | 0.7976 | 0.0705 |
| TYRO3      | 0.6951 | 1.0110 | 0.7857 | 0.6987 | 0.7976 | 0.0741 |
| SLC37A4    | 0.6546 | 1.1979 | 0.7043 | 0.6338 | 0.7976 | 0.1342 |
| CBX5       | 0.5325 | 1.0349 | 0.8275 | 0.7957 | 0.7977 | 0.1031 |
| TOR3A      | 0.6078 | 1.4435 | 0.5596 | 0.5801 | 0.7977 | 0.2155 |
| WDR21A     | 0.6814 | 0.9425 | 0.8675 | 0.6997 | 0.7978 | 0.0639 |
| ALG9       | 0.5150 | 1.4040 | 0.6559 | 0.6164 | 0.7978 | 0.2042 |
| DPY30      | 0.7078 | 0.8948 | 0.9091 | 0.6801 | 0.7980 | 0.0604 |
| MAPK12     | 0.6456 | 1.0521 | 0.7938 | 0.7006 | 0.7980 | 0.0900 |
| LOC648434  | 0.7666 | 0.8793 | 0.8485 | 0.6977 | 0.7980 | 0.0411 |
| GPI        | 0.5898 | 1.2528 | 0.7151 | 0.6345 | 0.7980 | 0.1538 |
| CTNNAL1    | 0.5989 | 1.0982 | 0.8032 | 0.6921 | 0.7981 | 0.1084 |
| LOC1001301 | 0.7196 | 0.9801 | 0.8221 | 0.6713 | 0.7983 | 0.0683 |
| MTHFD1     | 0.7179 | 0.9670 | 0.8209 | 0.6876 | 0.7983 | 0.0630 |
| PARP12     | 0.6661 | 1.0497 | 0.7308 | 0.7470 | 0.7984 | 0.0856 |
| SLC1A3     | 0.6241 | 0.9371 | 0.8024 | 0.8299 | 0.7984 | 0.0650 |
| MTPN       | 0.5718 | 0.9821 | 0.9967 | 0.6430 | 0.7984 | 0.1113 |
| FAM119B    | 0.7608 | 0.9645 | 0.7560 | 0.7124 | 0.7984 | 0.0564 |
| ALG1       | 0.5645 | 1.1036 | 0.7814 | 0.7441 | 0.7984 | 0.1122 |
| ATP2A2     | 0.6475 | 1.0860 | 0.7159 | 0.7445 | 0.7985 | 0.0980 |

|            |        |        |        |        |        |        |
|------------|--------|--------|--------|--------|--------|--------|
| C7orf26    | 0.7211 | 1.1481 | 0.7579 | 0.5669 | 0.7985 | 0.1237 |
| MRPL48     | 0.6651 | 0.8869 | 1.0256 | 0.6169 | 0.7986 | 0.0958 |
| CCDC137    | 0.6579 | 0.9843 | 0.8563 | 0.6961 | 0.7986 | 0.0753 |
| RBX1       | 0.8340 | 0.9837 | 0.8549 | 0.5223 | 0.7987 | 0.0979 |
| LOC1001337 | 0.8058 | 0.9330 | 0.7189 | 0.7371 | 0.7987 | 0.0485 |
| DBNDD1     | 0.7902 | 0.9631 | 0.8551 | 0.5866 | 0.7988 | 0.0792 |
| RIC8B      | 0.8203 | 0.8599 | 0.8063 | 0.7089 | 0.7989 | 0.0321 |
| RAPGEF2    | 0.6922 | 0.9065 | 0.9095 | 0.6873 | 0.7989 | 0.0630 |
| PFN1       | 0.6202 | 1.0691 | 0.8659 | 0.6407 | 0.7989 | 0.1059 |
| ZDHHC24    | 0.6140 | 1.0235 | 0.9097 | 0.6487 | 0.7990 | 0.0998 |
| AXIN1      | 0.6527 | 1.0370 | 0.8238 | 0.6824 | 0.7990 | 0.0877 |
| LRRC40     | 0.6530 | 1.0254 | 0.8727 | 0.6452 | 0.7991 | 0.0921 |
| LOC124512  | 0.7107 | 0.9451 | 0.9602 | 0.5803 | 0.7991 | 0.0926 |
| SORBS3     | 0.7411 | 0.9348 | 0.7953 | 0.7251 | 0.7991 | 0.0477 |
| VKORC1L1   | 0.6474 | 0.9381 | 0.9244 | 0.6865 | 0.7991 | 0.0768 |
| SIX5       | 0.6643 | 1.0961 | 0.7261 | 0.7100 | 0.7991 | 0.0999 |
| ESCO1      | 0.8089 | 0.8569 | 0.7565 | 0.7746 | 0.7992 | 0.0221 |
| LRRC1      | 0.6622 | 0.8994 | 0.8338 | 0.8017 | 0.7993 | 0.0500 |
| ACTN1      | 0.7554 | 1.0044 | 0.7944 | 0.6435 | 0.7994 | 0.0754 |
| TMED10P    | 0.6264 | 1.0432 | 0.9467 | 0.5813 | 0.7994 | 0.1150 |
| MPHOSPH6   | 0.6327 | 1.0271 | 0.9505 | 0.5876 | 0.7995 | 0.1108 |
| C6orf154   | 0.7064 | 0.9789 | 0.7696 | 0.7432 | 0.7995 | 0.0612 |
| PRKACB     | 0.7088 | 1.0769 | 0.7750 | 0.6375 | 0.7995 | 0.0966 |
| DNAJB1     | 0.8414 | 0.9878 | 0.7459 | 0.6236 | 0.7997 | 0.0769 |
| CAPZA2     | 0.5142 | 0.9352 | 0.9546 | 0.7948 | 0.7997 | 0.1016 |
| NUTF2      | 0.6455 | 1.0234 | 0.8915 | 0.6385 | 0.7998 | 0.0950 |
| RHBDD1     | 0.7742 | 0.9488 | 0.7856 | 0.6906 | 0.7998 | 0.0540 |
| C9orf114   | 0.5507 | 1.1414 | 0.8077 | 0.6996 | 0.7998 | 0.1254 |
| VAR5       | 0.6803 | 0.9794 | 0.8713 | 0.6685 | 0.7999 | 0.0758 |
| BCL6       | 0.6947 | 0.9947 | 0.8666 | 0.6435 | 0.7999 | 0.0806 |
| IPO7       | 0.5145 | 1.1667 | 0.8286 | 0.6898 | 0.7999 | 0.1381 |
| SNRPF      | 0.5388 | 1.1335 | 0.8552 | 0.6723 | 0.7999 | 0.1287 |
| MRPS23     | 0.6860 | 1.0648 | 0.8682 | 0.5813 | 0.8001 | 0.1063 |
| LOC728229  | 0.7053 | 1.1298 | 0.7239 | 0.6419 | 0.8003 | 0.1113 |
| NUCB2      | 0.7633 | 0.8168 | 1.0585 | 0.5627 | 0.8003 | 0.1020 |
| CTDSP1     | 0.7042 | 1.0045 | 0.7298 | 0.7633 | 0.8004 | 0.0691 |
| MRPL40     | 0.7496 | 0.9335 | 0.8832 | 0.6356 | 0.8005 | 0.0673 |
| ARRB1      | 0.7123 | 0.9155 | 0.8266 | 0.7477 | 0.8005 | 0.0452 |
| LOC643507  | 0.6315 | 1.0000 | 0.8887 | 0.6827 | 0.8007 | 0.0866 |
| NFE2L3     | 0.7469 | 0.8605 | 0.9197 | 0.6760 | 0.8008 | 0.0549 |
| LYPLA2P1   | 0.7324 | 0.9880 | 0.7708 | 0.7120 | 0.8008 | 0.0636 |
| GTF2I      | 0.5866 | 1.1398 | 0.8074 | 0.6698 | 0.8009 | 0.1218 |
| SAP30L     | 0.7497 | 0.9073 | 0.9230 | 0.6238 | 0.8010 | 0.0708 |
| ALDH16A1   | 0.7051 | 1.0600 | 0.7219 | 0.7169 | 0.8010 | 0.0864 |
| HADH2      | 0.7433 | 0.9086 | 0.8806 | 0.6716 | 0.8010 | 0.0563 |
| COTL1      | 0.7040 | 0.9779 | 0.7731 | 0.7491 | 0.8010 | 0.0607 |

|            |        |        |        |        |        |        |
|------------|--------|--------|--------|--------|--------|--------|
| SPA17      | 0.6791 | 0.9553 | 0.9472 | 0.6226 | 0.8010 | 0.0875 |
| NKRF       | 0.6265 | 0.9156 | 0.8960 | 0.7663 | 0.8011 | 0.0670 |
| PRCC       | 0.6616 | 1.0594 | 0.7865 | 0.6975 | 0.8012 | 0.0900 |
| RHOT2      | 0.7013 | 1.0258 | 0.7809 | 0.6970 | 0.8013 | 0.0773 |
| MAGEA6     | 0.6870 | 1.0617 | 0.8052 | 0.6511 | 0.8013 | 0.0928 |
| ATP5G2     | 0.7075 | 1.0812 | 0.8081 | 0.6084 | 0.8013 | 0.1018 |
| ZNF696     | 0.6470 | 1.0325 | 0.8305 | 0.6956 | 0.8014 | 0.0863 |
| UBXN2B     | 0.7123 | 0.9711 | 0.7519 | 0.7705 | 0.8015 | 0.0578 |
| ODF2       | 0.7494 | 1.0192 | 0.7770 | 0.6602 | 0.8015 | 0.0767 |
| COPS3      | 0.5997 | 0.9965 | 0.9382 | 0.6717 | 0.8015 | 0.0976 |
| MFSD3      | 0.6821 | 1.0973 | 0.7990 | 0.6278 | 0.8016 | 0.1048 |
| MTIF3      | 0.6028 | 1.0095 | 0.8864 | 0.7079 | 0.8017 | 0.0907 |
| SOHLH2     | 0.7611 | 0.9807 | 0.8375 | 0.6274 | 0.8017 | 0.0738 |
| DHRS11     | 0.7681 | 0.9321 | 0.7722 | 0.7344 | 0.8017 | 0.0443 |
| SNORD68    | 0.6630 | 0.8992 | 0.8968 | 0.7480 | 0.8018 | 0.0582 |
| HK2        | 0.6909 | 1.1379 | 0.7428 | 0.6361 | 0.8019 | 0.1141 |
| PAPD1      | 0.6038 | 1.0208 | 0.9060 | 0.6772 | 0.8019 | 0.0973 |
| STAG1      | 0.7531 | 0.8566 | 0.8938 | 0.7044 | 0.8020 | 0.0441 |
| TSC22D3    | 0.7643 | 0.9999 | 0.7223 | 0.7215 | 0.8020 | 0.0667 |
| METAP2     | 0.6183 | 1.0598 | 0.8634 | 0.6666 | 0.8020 | 0.1010 |
| CDC42EP2   | 0.6433 | 1.1240 | 0.7302 | 0.7107 | 0.8020 | 0.1089 |
| SNORA18    | 0.6363 | 1.1337 | 0.7278 | 0.7107 | 0.8021 | 0.1123 |
| LOC1001295 | 0.6508 | 1.0626 | 0.7399 | 0.7554 | 0.8022 | 0.0898 |
| DNAJC10    | 0.7463 | 0.9052 | 0.9198 | 0.6382 | 0.8024 | 0.0674 |
| RINT1      | 0.6203 | 1.1057 | 0.8215 | 0.6622 | 0.8024 | 0.1100 |
| THOP1      | 0.5890 | 1.0912 | 0.7758 | 0.7540 | 0.8025 | 0.1049 |
| TARBP2     | 0.7215 | 0.9633 | 0.8350 | 0.6902 | 0.8025 | 0.0620 |
| CSNK2B     | 0.7412 | 1.1038 | 0.8221 | 0.5430 | 0.8025 | 0.1163 |
| WDR41      | 0.6526 | 1.0754 | 0.8219 | 0.6607 | 0.8026 | 0.0989 |
| C16orf74   | 0.7386 | 0.9307 | 0.8041 | 0.7375 | 0.8027 | 0.0454 |
| PACSIN3    | 0.8231 | 0.9533 | 0.7033 | 0.7313 | 0.8027 | 0.0563 |
| ABHD5      | 0.7032 | 0.9037 | 0.9110 | 0.6931 | 0.8028 | 0.0604 |
| DDX28      | 0.7841 | 0.9976 | 0.7683 | 0.6610 | 0.8028 | 0.0705 |
| C3orf15    | 0.7180 | 0.9284 | 0.8193 | 0.7454 | 0.8028 | 0.0470 |
| NIT2       | 0.6162 | 0.9785 | 0.8767 | 0.7399 | 0.8028 | 0.0791 |
| LYSMD1     | 0.5595 | 1.0041 | 0.8912 | 0.7568 | 0.8029 | 0.0956 |
| MRPL14     | 0.6870 | 1.0276 | 0.7862 | 0.7109 | 0.8029 | 0.0778 |
| FAM69B     | 0.7359 | 0.9569 | 0.7997 | 0.7195 | 0.8030 | 0.0541 |
| CD83       | 0.6980 | 1.0063 | 0.8222 | 0.6857 | 0.8030 | 0.0744 |
| GCH1       | 0.6373 | 1.0173 | 0.8709 | 0.6869 | 0.8031 | 0.0873 |
| EPCAM      | 0.7012 | 0.8718 | 1.0004 | 0.6396 | 0.8032 | 0.0820 |
| NUMB       | 0.7514 | 1.0140 | 0.8372 | 0.6107 | 0.8033 | 0.0843 |
| CDC123     | 0.6247 | 1.1867 | 0.7466 | 0.6553 | 0.8033 | 0.1304 |
| RDBP       | 0.6506 | 0.9736 | 0.8546 | 0.7346 | 0.8034 | 0.0705 |
| BRWD1      | 0.6803 | 0.9671 | 0.8345 | 0.7316 | 0.8034 | 0.0633 |
| PIGM       | 0.7044 | 1.0510 | 0.7290 | 0.7293 | 0.8034 | 0.0827 |

|           |        |        |        |        |        |        |
|-----------|--------|--------|--------|--------|--------|--------|
| C17orf106 | 0.6399 | 1.0707 | 0.8145 | 0.6887 | 0.8034 | 0.0964 |
| DKC1      | 0.6013 | 1.1952 | 0.8281 | 0.5897 | 0.8036 | 0.1416 |
| GRAMD1A   | 0.7160 | 1.1661 | 0.7194 | 0.6129 | 0.8036 | 0.1233 |
| C6orf115  | 0.6729 | 0.9743 | 0.9393 | 0.6280 | 0.8036 | 0.0892 |
| PSMA5     | 0.6864 | 0.9815 | 0.9286 | 0.6184 | 0.8037 | 0.0891 |
| LOC643387 | 0.7271 | 0.8953 | 0.8938 | 0.6988 | 0.8038 | 0.0528 |
| CLPX      | 0.6380 | 1.1902 | 0.7926 | 0.5942 | 0.8038 | 0.1357 |
| GNPDA2    | 0.7021 | 1.0006 | 0.8002 | 0.7125 | 0.8038 | 0.0692 |
| C9orf116  | 0.7426 | 1.0096 | 0.8246 | 0.6386 | 0.8039 | 0.0784 |
| MTX2      | 0.6976 | 0.9172 | 0.9476 | 0.6535 | 0.8040 | 0.0749 |
| GMPPA     | 0.6973 | 0.9969 | 0.8024 | 0.7195 | 0.8040 | 0.0682 |
| ERI1      | 0.6507 | 1.0931 | 0.7716 | 0.7015 | 0.8042 | 0.0994 |
| NFXL1     | 0.6176 | 0.9925 | 0.9347 | 0.6725 | 0.8043 | 0.0934 |
| C11orf83  | 0.7332 | 1.0032 | 0.7890 | 0.6918 | 0.8043 | 0.0692 |
| ZNF367    | 0.6554 | 1.0037 | 0.7481 | 0.8104 | 0.8044 | 0.0737 |
| HNRPR     | 0.6739 | 1.0920 | 0.7291 | 0.7227 | 0.8044 | 0.0966 |
| ZNF142    | 0.6166 | 1.1456 | 0.7604 | 0.6953 | 0.8045 | 0.1174 |
| NUDCD2    | 0.6437 | 0.9150 | 1.1092 | 0.5503 | 0.8045 | 0.1276 |
| KIAA0895  | 0.7092 | 1.0314 | 0.8048 | 0.6728 | 0.8046 | 0.0806 |
| TMEM5     | 0.5599 | 1.0346 | 0.8920 | 0.7317 | 0.8046 | 0.1024 |
| DCUN1D4   | 0.6418 | 1.0401 | 0.9118 | 0.6248 | 0.8046 | 0.1024 |
| KIAA0020  | 0.7690 | 0.9998 | 0.8107 | 0.6397 | 0.8048 | 0.0745 |
| TMEM186   | 0.8891 | 0.9039 | 0.7693 | 0.6571 | 0.8048 | 0.0577 |
| GPR89C    | 0.6383 | 0.9870 | 0.9764 | 0.6177 | 0.8049 | 0.1022 |
| ERAL1     | 0.6781 | 0.9945 | 0.8883 | 0.6587 | 0.8049 | 0.0818 |
| LRRC3     | 0.7107 | 0.9519 | 0.8054 | 0.7522 | 0.8051 | 0.0527 |
| LOC731878 | 0.6513 | 1.0434 | 0.8601 | 0.6655 | 0.8051 | 0.0926 |
| AKT1S1    | 0.7084 | 1.0149 | 0.7237 | 0.7734 | 0.8051 | 0.0713 |
| GBA       | 0.6297 | 1.0799 | 0.8146 | 0.6962 | 0.8051 | 0.0993 |
| OBFC2A    | 0.4810 | 1.3014 | 0.8768 | 0.5612 | 0.8051 | 0.1862 |
| BIVM      | 0.6969 | 0.9937 | 0.8054 | 0.7252 | 0.8053 | 0.0669 |
| C11orf24  | 0.6849 | 0.9094 | 0.9278 | 0.6992 | 0.8053 | 0.0656 |
| UBE2D3    | 0.6432 | 1.0692 | 0.8609 | 0.6479 | 0.8053 | 0.1016 |
| CTSA      | 0.6363 | 1.0772 | 0.7791 | 0.7288 | 0.8054 | 0.0953 |
| SIVA1     | 0.5865 | 1.1675 | 0.8004 | 0.6672 | 0.8054 | 0.1285 |
| ZNF695    | 0.6746 | 0.9274 | 0.8344 | 0.7853 | 0.8054 | 0.0526 |
| NAGPA     | 0.7326 | 0.9785 | 0.8239 | 0.6868 | 0.8054 | 0.0644 |
| ASPH      | 0.7427 | 0.9266 | 0.8042 | 0.7483 | 0.8054 | 0.0427 |
| TRAM2     | 0.7570 | 1.0063 | 0.7596 | 0.6988 | 0.8054 | 0.0684 |
| TIGD7     | 0.6697 | 1.0873 | 0.7701 | 0.6948 | 0.8055 | 0.0963 |
| C14orf129 | 0.6431 | 1.0572 | 0.8016 | 0.7207 | 0.8056 | 0.0899 |
| EXOSC10   | 0.6762 | 1.1270 | 0.7700 | 0.6497 | 0.8057 | 0.1102 |
| UHRF1BP1  | 0.6690 | 0.9549 | 0.8576 | 0.7415 | 0.8057 | 0.0631 |
| ADAL      | 0.6968 | 0.9909 | 0.8100 | 0.7254 | 0.8058 | 0.0662 |
| CHRAC1    | 0.7378 | 0.9177 | 0.7836 | 0.7840 | 0.8058 | 0.0388 |
| LOC728026 | 0.7020 | 0.8694 | 0.9751 | 0.6766 | 0.8058 | 0.0708 |

|            |        |        |        |        |        |        |
|------------|--------|--------|--------|--------|--------|--------|
| LOC653156  | 0.2427 | 1.1476 | 1.2614 | 0.5714 | 0.8058 | 0.2409 |
| C14orf142  | 0.7284 | 0.7755 | 0.9508 | 0.7692 | 0.8060 | 0.0494 |
| POLRMT     | 0.6435 | 1.0178 | 0.7741 | 0.7885 | 0.8060 | 0.0778 |
| LOC1001343 | 0.6741 | 1.0416 | 0.8296 | 0.6787 | 0.8060 | 0.0864 |
| PTDSS2     | 0.6156 | 1.1141 | 0.8716 | 0.6232 | 0.8061 | 0.1186 |
| MCRS1      | 0.7026 | 0.9739 | 0.8128 | 0.7353 | 0.8061 | 0.0605 |
| MOSC2      | 0.5553 | 1.0926 | 0.8714 | 0.7058 | 0.8063 | 0.1152 |
| LOC727900  | 0.6472 | 1.0870 | 0.7683 | 0.7230 | 0.8064 | 0.0968 |
| SPIN1      | 0.6444 | 0.8966 | 0.8742 | 0.8104 | 0.8064 | 0.0570 |
| TMEM191B   | 0.7241 | 1.0248 | 0.7869 | 0.6900 | 0.8065 | 0.0755 |
| PTMS       | 0.7147 | 1.0946 | 0.7108 | 0.7065 | 0.8066 | 0.0960 |
| DHRS3      | 0.7260 | 0.9329 | 0.8305 | 0.7371 | 0.8066 | 0.0482 |
| ESD        | 0.6912 | 0.9983 | 0.8573 | 0.6800 | 0.8067 | 0.0757 |
| SMARCA2    | 0.7539 | 0.9823 | 0.8978 | 0.5929 | 0.8067 | 0.0855 |
| INPP5E     | 0.7290 | 1.0296 | 0.7402 | 0.7282 | 0.8067 | 0.0743 |
| LOC284167  | 0.6562 | 1.1204 | 0.7894 | 0.6610 | 0.8067 | 0.1090 |
| PRSS8      | 0.6917 | 1.0348 | 0.8322 | 0.6686 | 0.8068 | 0.0841 |
| LOC649821  | 0.6033 | 1.1070 | 0.9102 | 0.6067 | 0.8068 | 0.1232 |
| POLS       | 0.7209 | 0.9409 | 0.8361 | 0.7295 | 0.8069 | 0.0518 |
| XRCC5      | 0.6548 | 1.0725 | 0.8855 | 0.6147 | 0.8069 | 0.1068 |
| HNRNPH3    | 0.6049 | 1.0093 | 0.9696 | 0.6441 | 0.8070 | 0.1060 |
| LOC340260  | 0.6843 | 1.0574 | 0.7527 | 0.7336 | 0.8070 | 0.0847 |
| GTF3A      | 0.5634 | 1.1048 | 0.9448 | 0.6156 | 0.8071 | 0.1303 |
| FAM86A     | 0.5799 | 1.0959 | 0.9247 | 0.6281 | 0.8071 | 0.1228 |
| ABHD2      | 0.6759 | 1.1215 | 0.7952 | 0.6363 | 0.8072 | 0.1101 |
| SMARCD1    | 0.7602 | 0.9858 | 0.7759 | 0.7069 | 0.8072 | 0.0613 |
| TMEM69     | 0.5770 | 1.2122 | 0.7774 | 0.6626 | 0.8073 | 0.1411 |
| USP13      | 0.6280 | 0.9837 | 0.9107 | 0.7067 | 0.8073 | 0.0837 |
| CLPP       | 0.7236 | 1.1608 | 0.7250 | 0.6198 | 0.8073 | 0.1204 |
| UNC84A     | 0.6928 | 1.0368 | 0.7942 | 0.7061 | 0.8075 | 0.0797 |
| LOC729057  | 0.6725 | 0.9636 | 0.8575 | 0.7363 | 0.8075 | 0.0647 |
| RMI1       | 0.7424 | 0.9919 | 0.8690 | 0.6270 | 0.8076 | 0.0788 |
| SF3B4      | 0.6445 | 1.0338 | 0.8929 | 0.6592 | 0.8076 | 0.0945 |
| C6orf162   | 0.8101 | 0.8857 | 0.7927 | 0.7418 | 0.8076 | 0.0298 |
| LGALS3BP   | 0.7030 | 1.0060 | 0.9247 | 0.5966 | 0.8076 | 0.0951 |
| PET112L    | 0.7335 | 1.0450 | 0.8135 | 0.6385 | 0.8076 | 0.0868 |
| THOC3      | 0.7105 | 1.0666 | 0.8014 | 0.6522 | 0.8077 | 0.0916 |
| HSBP1      | 0.7616 | 1.1353 | 0.7199 | 0.6143 | 0.8078 | 0.1135 |
| MLKL       | 0.6854 | 0.9924 | 0.8185 | 0.7349 | 0.8078 | 0.0674 |
| DHX9       | 0.6967 | 1.1152 | 0.7810 | 0.6385 | 0.8078 | 0.1065 |
| MRPL21     | 0.6528 | 1.0325 | 0.8591 | 0.6874 | 0.8080 | 0.0874 |
| NEK6       | 0.6589 | 0.9933 | 0.8309 | 0.7488 | 0.8080 | 0.0711 |
| ZNF746     | 0.7270 | 1.0846 | 0.7475 | 0.6733 | 0.8081 | 0.0935 |
| SEMA4F     | 0.6532 | 1.0526 | 0.6571 | 0.8697 | 0.8081 | 0.0959 |
| KHDRBS1    | 0.6385 | 1.1155 | 0.8858 | 0.5928 | 0.8082 | 0.1210 |
| LANCL1     | 0.7632 | 0.9368 | 0.8471 | 0.6856 | 0.8082 | 0.0541 |

|            |        |        |        |        |        |        |
|------------|--------|--------|--------|--------|--------|--------|
| ZNF259     | 0.6157 | 1.0855 | 0.8737 | 0.6579 | 0.8082 | 0.1083 |
| XYLB       | 0.7368 | 0.9231 | 0.7990 | 0.7741 | 0.8082 | 0.0404 |
| MTE        | 0.7192 | 1.0035 | 0.8033 | 0.7076 | 0.8084 | 0.0684 |
| ZNF643     | 0.7320 | 0.8780 | 0.8506 | 0.7730 | 0.8084 | 0.0338 |
| FANCB      | 0.6370 | 0.9367 | 0.8103 | 0.8498 | 0.8084 | 0.0630 |
| CDH26      | 0.7787 | 0.9342 | 0.7842 | 0.7368 | 0.8085 | 0.0432 |
| CCDC117    | 0.6052 | 1.2403 | 0.7509 | 0.6376 | 0.8085 | 0.1473 |
| LOC1001334 | 0.6498 | 1.0329 | 0.8278 | 0.7235 | 0.8085 | 0.0832 |
| VPS54      | 0.7280 | 0.9433 | 0.7882 | 0.7745 | 0.8085 | 0.0467 |
| ZNF7       | 0.7517 | 1.0332 | 0.7407 | 0.7085 | 0.8085 | 0.0755 |
| ARFGEF2    | 0.7188 | 0.9685 | 0.7980 | 0.7488 | 0.8085 | 0.0558 |
| LOC1001331 | 0.6004 | 1.0812 | 0.8825 | 0.6706 | 0.8087 | 0.1088 |
| S100A6     | 0.5732 | 1.2507 | 0.5200 | 0.8911 | 0.8088 | 0.1685 |
| ANAPC11    | 0.7255 | 1.0656 | 0.7828 | 0.6613 | 0.8088 | 0.0891 |
| MKI67IP    | 0.5913 | 1.0164 | 0.9587 | 0.6695 | 0.8090 | 0.1050 |
| LOC440093  | 0.6260 | 1.1116 | 0.8651 | 0.6332 | 0.8090 | 0.1151 |
| C6orf120   | 0.7650 | 0.8071 | 0.9536 | 0.7103 | 0.8090 | 0.0521 |
| LOC653752  | 0.6375 | 0.9587 | 0.8471 | 0.7930 | 0.8091 | 0.0668 |
| CDK5RAP1   | 0.6943 | 1.0525 | 0.8131 | 0.6765 | 0.8091 | 0.0866 |
| TRIM28     | 0.8317 | 0.9624 | 0.7590 | 0.6835 | 0.8091 | 0.0594 |
| RAB36      | 0.7313 | 1.0697 | 0.8131 | 0.6225 | 0.8092 | 0.0952 |
| RFC1       | 0.7122 | 1.0841 | 0.7847 | 0.6557 | 0.8092 | 0.0954 |
| MDK        | 0.7653 | 0.9879 | 0.7661 | 0.7176 | 0.8092 | 0.0606 |
| YME1L1     | 0.6882 | 0.9956 | 0.8102 | 0.7430 | 0.8092 | 0.0669 |
| UGCGL1     | 0.6502 | 0.9731 | 0.8172 | 0.7965 | 0.8092 | 0.0661 |
| CCDC28B    | 0.7008 | 1.0070 | 0.8078 | 0.7213 | 0.8093 | 0.0699 |
| PHF16      | 0.6507 | 0.9421 | 0.9057 | 0.7386 | 0.8093 | 0.0690 |
| AFF3       | 0.6872 | 0.9289 | 0.8853 | 0.7358 | 0.8093 | 0.0580 |
| KRI1       | 0.7014 | 0.9073 | 0.8554 | 0.7731 | 0.8093 | 0.0453 |
| METAP1     | 0.7225 | 1.1708 | 0.7907 | 0.5533 | 0.8093 | 0.1304 |
| OSCP1      | 0.6864 | 0.9911 | 0.8897 | 0.6702 | 0.8094 | 0.0785 |
| GTF2E2     | 0.7135 | 1.0362 | 0.8513 | 0.6366 | 0.8094 | 0.0877 |
| PRPF4      | 0.6263 | 0.9695 | 0.9159 | 0.7260 | 0.8094 | 0.0803 |
| TBCE       | 0.6437 | 1.0178 | 0.8708 | 0.7056 | 0.8095 | 0.0844 |
| CNIH       | 0.5874 | 1.0914 | 0.9064 | 0.6530 | 0.8095 | 0.1164 |
| RICH2      | 0.7190 | 1.0012 | 0.7868 | 0.7313 | 0.8096 | 0.0656 |
| OSTC       | 0.6755 | 1.0481 | 0.8815 | 0.6341 | 0.8098 | 0.0961 |
| GMPPB      | 0.6404 | 1.0818 | 0.8799 | 0.6372 | 0.8098 | 0.1070 |
| PPP1R11    | 0.7365 | 1.0387 | 0.8338 | 0.6304 | 0.8099 | 0.0869 |
| POMZP3     | 0.7215 | 0.9997 | 0.8632 | 0.6552 | 0.8099 | 0.0767 |
| SPNS1      | 0.7474 | 1.0986 | 0.7344 | 0.6595 | 0.8100 | 0.0981 |
| MAEA       | 0.5811 | 1.1637 | 0.8214 | 0.6742 | 0.8101 | 0.1278 |
| LOC286016  | 0.5689 | 1.2484 | 0.7738 | 0.6496 | 0.8102 | 0.1520 |
| ADAT1      | 0.6426 | 1.0891 | 0.8469 | 0.6622 | 0.8102 | 0.1037 |
| FCHSD2     | 0.6479 | 0.8647 | 0.9703 | 0.7582 | 0.8103 | 0.0693 |
| PPP2R5C    | 0.6646 | 1.0726 | 0.8354 | 0.6686 | 0.8103 | 0.0961 |

|            |        |        |        |        |        |        |
|------------|--------|--------|--------|--------|--------|--------|
| MRPL50     | 0.6050 | 0.8988 | 1.0000 | 0.7377 | 0.8104 | 0.0872 |
| AOF2       | 0.6344 | 1.1238 | 0.8190 | 0.6657 | 0.8107 | 0.1119 |
| PIK3C2B    | 0.7037 | 1.0403 | 0.7749 | 0.7239 | 0.8107 | 0.0780 |
| LOC439953  | 0.7413 | 0.9069 | 0.8761 | 0.7187 | 0.8108 | 0.0473 |
| TMEM39A    | 0.7627 | 0.9591 | 0.7939 | 0.7274 | 0.8108 | 0.0513 |
| S100A4     | 0.7024 | 0.8720 | 0.8551 | 0.8140 | 0.8109 | 0.0381 |
| XPO4       | 0.7204 | 1.0137 | 0.7804 | 0.7293 | 0.8109 | 0.0689 |
| CXXC1      | 0.7023 | 1.0498 | 0.7616 | 0.7303 | 0.8110 | 0.0805 |
| FAM83F     | 0.6763 | 0.9276 | 0.8578 | 0.7827 | 0.8111 | 0.0538 |
| LRRC42     | 0.6769 | 1.0078 | 0.8754 | 0.6844 | 0.8111 | 0.0801 |
| BAMBI      | 0.7020 | 0.8899 | 0.9875 | 0.6652 | 0.8111 | 0.0767 |
| PTS        | 0.6870 | 1.0208 | 0.9141 | 0.6228 | 0.8112 | 0.0937 |
| TRIM11     | 0.6490 | 1.0897 | 0.7649 | 0.7413 | 0.8112 | 0.0961 |
| C19orf25   | 0.6877 | 0.9780 | 0.8209 | 0.7584 | 0.8113 | 0.0619 |
| ABCB9      | 0.7005 | 1.0058 | 0.8534 | 0.6854 | 0.8113 | 0.0751 |
| NCRNA00094 | 0.7305 | 1.0185 | 0.8379 | 0.6582 | 0.8113 | 0.0783 |
| PSMC3      | 0.6053 | 1.1325 | 0.8602 | 0.6472 | 0.8113 | 0.1207 |
| RAD51      | 0.7178 | 0.9839 | 0.8065 | 0.7377 | 0.8115 | 0.0605 |
| SSSCA1     | 0.6007 | 1.0492 | 0.8565 | 0.7398 | 0.8115 | 0.0949 |
| NDUFA10    | 0.6415 | 1.1313 | 0.8322 | 0.6412 | 0.8116 | 0.1157 |
| CWC15      | 0.6592 | 1.0025 | 0.9074 | 0.6772 | 0.8116 | 0.0851 |
| TARS       | 0.7770 | 0.9059 | 1.0356 | 0.5280 | 0.8116 | 0.1083 |
| IRAK1      | 0.7738 | 1.0470 | 0.7759 | 0.6498 | 0.8116 | 0.0838 |
| ZFAND2B    | 0.7400 | 0.9036 | 0.8622 | 0.7407 | 0.8116 | 0.0420 |
| LOC653604  | 0.6192 | 0.9617 | 0.8769 | 0.7892 | 0.8117 | 0.0732 |
| TIPIN      | 0.6154 | 0.9619 | 0.9409 | 0.7288 | 0.8117 | 0.0840 |
| RDM1       | 0.6942 | 1.0360 | 0.8255 | 0.6912 | 0.8117 | 0.0811 |
| LOC729200  | 0.6631 | 0.9373 | 1.0482 | 0.5985 | 0.8118 | 0.1077 |
| C2orf7     | 0.6996 | 0.9879 | 0.9842 | 0.5754 | 0.8118 | 0.1038 |
| CXorf56    | 0.7205 | 0.9752 | 0.8495 | 0.7022 | 0.8119 | 0.0636 |
| GMPR2      | 0.7729 | 0.8944 | 0.8546 | 0.7258 | 0.8119 | 0.0383 |
| REXO4      | 0.5743 | 1.1709 | 0.9548 | 0.5476 | 0.8119 | 0.1515 |
| KIFC2      | 0.6219 | 1.2915 | 0.7184 | 0.6163 | 0.8120 | 0.1615 |
| GPT2       | 0.7424 | 1.2903 | 0.7007 | 0.5150 | 0.8121 | 0.1669 |
| SIKE       | 0.6578 | 1.0219 | 0.8262 | 0.7425 | 0.8121 | 0.0779 |
| PPM1G      | 0.6363 | 1.1333 | 0.8634 | 0.6156 | 0.8121 | 0.1209 |
| CDC26      | 0.6041 | 1.1986 | 0.8308 | 0.6152 | 0.8122 | 0.1390 |
| YBX1       | 0.6331 | 0.9949 | 1.0102 | 0.6106 | 0.8122 | 0.1101 |
| ARFIP1     | 0.7320 | 0.9751 | 0.8730 | 0.6689 | 0.8122 | 0.0690 |
| C22orf40   | 0.7375 | 1.0103 | 0.7809 | 0.7203 | 0.8122 | 0.0672 |
| LSM7       | 0.6376 | 1.1247 | 0.8424 | 0.6443 | 0.8122 | 0.1145 |
| LOC1001326 | 0.6898 | 0.9438 | 0.9942 | 0.6211 | 0.8122 | 0.0922 |
| LHX2       | 0.7090 | 1.0489 | 0.8114 | 0.6800 | 0.8123 | 0.0837 |
| MRPS34     | 0.7252 | 1.0797 | 0.7387 | 0.7063 | 0.8125 | 0.0893 |
| ARPC5L     | 0.5671 | 1.2920 | 0.7397 | 0.6514 | 0.8125 | 0.1636 |
| ROGDI      | 0.7033 | 0.9857 | 0.7942 | 0.7670 | 0.8126 | 0.0608 |



|            |        |        |        |        |        |        |
|------------|--------|--------|--------|--------|--------|--------|
| HMGN4      | 0.7255 | 1.0747 | 0.8218 | 0.6283 | 0.8126 | 0.0959 |
| LOC729608  | 0.5940 | 1.0153 | 0.9744 | 0.6666 | 0.8126 | 0.1066 |
| NAGLU      | 0.8696 | 1.0602 | 0.7278 | 0.5933 | 0.8127 | 0.0999 |
| LOC644330  | 0.5826 | 1.2466 | 0.7819 | 0.6402 | 0.8128 | 0.1505 |
| SLC2A4RG   | 0.6810 | 1.0403 | 0.8082 | 0.7219 | 0.8129 | 0.0803 |
| CXorf26    | 0.6952 | 0.9158 | 0.9392 | 0.7019 | 0.8130 | 0.0663 |
| NANS       | 0.7056 | 1.0593 | 0.8798 | 0.6080 | 0.8132 | 0.0995 |
| FADS1      | 0.6497 | 1.0878 | 0.8654 | 0.6501 | 0.8132 | 0.1047 |
| PRDX1      | 0.6839 | 1.1245 | 0.8668 | 0.5778 | 0.8133 | 0.1197 |
| DYNLT1     | 0.8522 | 1.0487 | 0.7585 | 0.5937 | 0.8133 | 0.0949 |
| NOC2L      | 0.6808 | 1.0020 | 0.8398 | 0.7306 | 0.8133 | 0.0711 |
| OBFC2B     | 0.7380 | 1.1036 | 0.7250 | 0.6867 | 0.8133 | 0.0974 |
| LOC1001291 | 0.6638 | 0.8842 | 1.0314 | 0.6740 | 0.8134 | 0.0887 |
| AFG3L2     | 0.6407 | 1.2655 | 0.7412 | 0.6061 | 0.8134 | 0.1534 |
| MASTL      | 0.7442 | 0.9451 | 0.7346 | 0.8297 | 0.8134 | 0.0488 |
| C13orf23   | 0.7040 | 1.0617 | 0.7760 | 0.7119 | 0.8134 | 0.0843 |
| DMTF1      | 0.7308 | 0.9756 | 0.8188 | 0.7289 | 0.8135 | 0.0580 |
| C2orf25    | 0.6391 | 1.0146 | 0.9135 | 0.6870 | 0.8135 | 0.0898 |
| DBP        | 0.7623 | 0.9480 | 0.8896 | 0.6548 | 0.8137 | 0.0656 |
| PGS1       | 0.7227 | 0.9456 | 0.9132 | 0.6737 | 0.8138 | 0.0678 |
| COASY      | 0.8133 | 1.0239 | 0.7783 | 0.6400 | 0.8139 | 0.0794 |
| SPIRE2     | 0.8025 | 0.9680 | 0.7131 | 0.7720 | 0.8139 | 0.0546 |
| IFITM1     | 0.7877 | 0.8625 | 0.9025 | 0.7030 | 0.8139 | 0.0440 |
| SEC11C     | 0.6835 | 1.0002 | 0.9876 | 0.5845 | 0.8140 | 0.1059 |
| GPR175     | 0.7232 | 0.9509 | 0.8547 | 0.7272 | 0.8140 | 0.0549 |
| UBE2N      | 0.8204 | 0.9424 | 0.9509 | 0.5424 | 0.8140 | 0.0953 |
| TOP3A      | 0.7014 | 0.9818 | 0.8341 | 0.7390 | 0.8141 | 0.0625 |
| ZNF74      | 0.7948 | 0.9632 | 0.8172 | 0.6813 | 0.8141 | 0.0579 |
| ATP1B3     | 0.6609 | 0.9665 | 1.0289 | 0.6001 | 0.8141 | 0.1075 |
| PSMG3      | 0.6686 | 1.2170 | 0.7251 | 0.6458 | 0.8141 | 0.1353 |
| C9orf142   | 0.6167 | 1.1855 | 0.7980 | 0.6565 | 0.8142 | 0.1297 |
| FLJ22639   | 0.6564 | 0.9758 | 0.7698 | 0.8547 | 0.8142 | 0.0675 |
| PDHB       | 0.7917 | 0.9900 | 0.9496 | 0.5256 | 0.8142 | 0.1053 |
| FBLN2      | 0.7492 | 0.9711 | 0.7843 | 0.7523 | 0.8142 | 0.0529 |
| EIF2S2     | 0.7749 | 0.9267 | 0.8028 | 0.7525 | 0.8142 | 0.0389 |
| PDK3       | 0.6899 | 1.0874 | 0.8427 | 0.6372 | 0.8143 | 0.1009 |
| LOC387882  | 0.6145 | 1.1262 | 0.8573 | 0.6592 | 0.8143 | 0.1166 |
| GAGE8      | 0.8083 | 0.8251 | 1.0840 | 0.5399 | 0.8143 | 0.1111 |
| LOC441408  | 0.8956 | 0.8985 | 0.8370 | 0.6264 | 0.8144 | 0.0642 |
| ZIC2       | 0.5170 | 1.2140 | 0.8319 | 0.6951 | 0.8145 | 0.1479 |
| TOMM40L    | 0.6598 | 0.9808 | 0.8842 | 0.7332 | 0.8145 | 0.0725 |
| TMEM188    | 0.6933 | 1.0282 | 0.8573 | 0.6794 | 0.8145 | 0.0819 |
| KIAA0892   | 0.7658 | 0.9597 | 0.7505 | 0.7825 | 0.8146 | 0.0488 |
| SP8        | 0.6923 | 0.9777 | 0.8707 | 0.7180 | 0.8147 | 0.0671 |
| RNF187     | 0.7024 | 1.1137 | 0.6999 | 0.7428 | 0.8147 | 0.1002 |
| HPS5       | 0.6910 | 0.9988 | 0.8843 | 0.6848 | 0.8147 | 0.0769 |

|           |        |        |        |        |        |        |
|-----------|--------|--------|--------|--------|--------|--------|
| KIAA0564  | 0.7504 | 0.9325 | 0.8190 | 0.7569 | 0.8147 | 0.0422 |
| POGK      | 0.6844 | 1.0587 | 0.8295 | 0.6863 | 0.8147 | 0.0881 |
| FKSG30    | 0.6611 | 1.1075 | 0.9049 | 0.5855 | 0.8147 | 0.1190 |
| CDKN2A    | 0.7571 | 0.9535 | 0.8249 | 0.7236 | 0.8148 | 0.0508 |
| TRA2A     | 0.6807 | 1.1442 | 0.8230 | 0.6112 | 0.8148 | 0.1183 |
| RSBN1L    | 0.7198 | 1.0625 | 0.9236 | 0.5536 | 0.8149 | 0.1120 |
| DIMT1L    | 0.6074 | 1.0136 | 0.9236 | 0.7150 | 0.8149 | 0.0932 |
| ZNF252    | 0.7742 | 1.1552 | 0.6954 | 0.6350 | 0.8149 | 0.1169 |
| VPS37A    | 0.6361 | 0.9480 | 1.0453 | 0.6311 | 0.8151 | 0.1067 |
| NUP107    | 0.6744 | 1.1585 | 0.7966 | 0.6310 | 0.8151 | 0.1197 |
| FIBP      | 0.6496 | 1.0597 | 0.8292 | 0.7220 | 0.8151 | 0.0895 |
| RFXAP     | 0.7009 | 1.0220 | 0.8063 | 0.7315 | 0.8152 | 0.0724 |
| STARD8    | 0.8431 | 0.7345 | 0.9095 | 0.7738 | 0.8152 | 0.0386 |
| API5      | 0.6747 | 1.0501 | 0.8458 | 0.6906 | 0.8153 | 0.0873 |
| HNRNPF    | 0.7604 | 0.9631 | 0.7603 | 0.7773 | 0.8153 | 0.0494 |
| CHAC1     | 0.9088 | 0.8128 | 0.7642 | 0.7757 | 0.8154 | 0.0328 |
| LOC641844 | 0.4825 | 1.3058 | 0.9228 | 0.5504 | 0.8154 | 0.1900 |
| HNRPUL2   | 0.7746 | 0.9584 | 0.7818 | 0.7468 | 0.8154 | 0.0483 |
| TXN       | 0.6988 | 1.0781 | 0.8846 | 0.6002 | 0.8154 | 0.1056 |
| RCC2      | 0.5803 | 1.3476 | 0.7233 | 0.6106 | 0.8154 | 0.1800 |
| SUPT16H   | 0.6590 | 1.1021 | 0.8153 | 0.6860 | 0.8156 | 0.1014 |
| COX5A     | 0.6745 | 0.8858 | 0.9582 | 0.7439 | 0.8156 | 0.0648 |
| PLSCR3    | 0.8289 | 1.1128 | 0.6753 | 0.6455 | 0.8156 | 0.1069 |
| LSM8      | 0.6314 | 1.1213 | 0.7786 | 0.7313 | 0.8156 | 0.1064 |
| PLEKHJ1   | 0.6440 | 0.8842 | 1.0589 | 0.6755 | 0.8157 | 0.0970 |
| SMYD4     | 0.7598 | 0.9377 | 0.8771 | 0.6885 | 0.8158 | 0.0562 |
| ANAPC7    | 0.6109 | 1.1879 | 0.7772 | 0.6870 | 0.8158 | 0.1286 |
| KAZALD1   | 0.6457 | 0.8994 | 0.8301 | 0.8880 | 0.8158 | 0.0587 |
| GRSF1     | 0.5950 | 1.1129 | 0.7742 | 0.7814 | 0.8159 | 0.1080 |
| TCEAL8    | 0.6906 | 1.0817 | 0.8581 | 0.6331 | 0.8159 | 0.1006 |
| DHX36     | 0.6895 | 0.9941 | 0.9170 | 0.6631 | 0.8159 | 0.0823 |
| RING1     | 0.7581 | 0.9788 | 0.7953 | 0.7317 | 0.8160 | 0.0558 |
| FAM175B   | 0.6523 | 1.0058 | 0.9022 | 0.7037 | 0.8160 | 0.0831 |
| PAFAH2    | 0.6342 | 1.0499 | 0.7898 | 0.7902 | 0.8160 | 0.0862 |
| LOC647481 | 0.6963 | 1.0078 | 0.7996 | 0.7606 | 0.8161 | 0.0674 |
| GNL1      | 0.7396 | 1.0921 | 0.7593 | 0.6734 | 0.8161 | 0.0938 |
| MYD88     | 0.6764 | 1.2041 | 0.7590 | 0.6250 | 0.8161 | 0.1322 |
| C20orf3   | 0.7049 | 1.2278 | 0.7245 | 0.6074 | 0.8162 | 0.1396 |
| C1orf124  | 0.6693 | 1.0731 | 0.8342 | 0.6880 | 0.8162 | 0.0932 |
| ZNF480    | 0.6272 | 1.0744 | 0.8596 | 0.7040 | 0.8163 | 0.0987 |
| SNORD83B  | 0.7373 | 0.9489 | 0.8519 | 0.7272 | 0.8163 | 0.0525 |
| LOC653383 | 0.7797 | 1.1000 | 0.7799 | 0.6061 | 0.8164 | 0.1030 |
| HAUS4     | 0.7289 | 1.0967 | 0.7505 | 0.6897 | 0.8165 | 0.0943 |
| B9D1      | 0.7170 | 0.9254 | 0.8627 | 0.7608 | 0.8165 | 0.0474 |
| UBXN2A    | 0.6539 | 0.9838 | 0.8576 | 0.7707 | 0.8165 | 0.0696 |
| PSMA3     | 0.6905 | 1.0157 | 0.9125 | 0.6475 | 0.8165 | 0.0882 |

|             |        |        |        |        |        |        |
|-------------|--------|--------|--------|--------|--------|--------|
| PXMP2       | 0.7162 | 1.0422 | 0.8084 | 0.7001 | 0.8167 | 0.0789 |
| RBM27       | 0.7594 | 0.9685 | 0.8332 | 0.7058 | 0.8167 | 0.0569 |
| EFNB3       | 0.8132 | 1.0303 | 0.7288 | 0.6948 | 0.8168 | 0.0754 |
| GTF2H3      | 0.6921 | 1.0243 | 0.9037 | 0.6471 | 0.8168 | 0.0890 |
| SAMM50      | 0.6037 | 1.1688 | 0.8234 | 0.6714 | 0.8168 | 0.1260 |
| RMND5A      | 0.7219 | 1.0982 | 0.6723 | 0.7751 | 0.8168 | 0.0961 |
| C2orf15     | 0.6117 | 1.0424 | 0.9141 | 0.6992 | 0.8169 | 0.0984 |
| FAM136B     | 0.7630 | 0.8375 | 0.8865 | 0.7805 | 0.8169 | 0.0281 |
| TMEM168     | 0.5388 | 1.2658 | 0.8033 | 0.6595 | 0.8169 | 0.1591 |
| SOX13       | 0.7837 | 0.9709 | 0.8180 | 0.6949 | 0.8169 | 0.0575 |
| LOC345645   | 0.6826 | 0.9266 | 0.9528 | 0.7056 | 0.8169 | 0.0713 |
| ADCK1       | 0.8128 | 0.8989 | 0.7995 | 0.7564 | 0.8169 | 0.0299 |
| WDR82       | 0.7219 | 0.9038 | 1.0300 | 0.6120 | 0.8169 | 0.0931 |
| C10orf61    | 0.7048 | 1.0419 | 0.8521 | 0.6690 | 0.8169 | 0.0848 |
| LOC644063   | 0.5910 | 1.2007 | 0.8097 | 0.6669 | 0.8171 | 0.1357 |
| SNAPC2      | 0.7511 | 1.0268 | 0.8232 | 0.6672 | 0.8171 | 0.0768 |
| RNF113A     | 0.6304 | 0.9840 | 1.0070 | 0.6470 | 0.8171 | 0.1032 |
| LOC654244   | 0.6734 | 1.0065 | 0.9809 | 0.6076 | 0.8171 | 0.1030 |
| COX7B       | 0.7394 | 0.9161 | 1.0583 | 0.5549 | 0.8172 | 0.1091 |
| LOC644096   | 0.7175 | 1.0173 | 0.7860 | 0.7482 | 0.8172 | 0.0681 |
| OCIAD2      | 0.8422 | 1.0137 | 0.8077 | 0.6054 | 0.8173 | 0.0838 |
| FAM86C      | 0.6524 | 1.0763 | 0.8335 | 0.7071 | 0.8173 | 0.0943 |
| RAB3IL1     | 0.6261 | 1.1917 | 0.8242 | 0.6272 | 0.8173 | 0.1332 |
| TBX1        | 0.6989 | 0.9829 | 0.8772 | 0.7105 | 0.8174 | 0.0686 |
| ATG4B       | 0.6475 | 1.1172 | 0.8343 | 0.6707 | 0.8174 | 0.1082 |
| LOC441714   | 0.7146 | 1.0059 | 0.8598 | 0.6894 | 0.8174 | 0.0732 |
| HSPC171     | 0.7190 | 1.0482 | 0.8481 | 0.6546 | 0.8175 | 0.0868 |
| NIN         | 0.7367 | 1.0242 | 0.7448 | 0.7646 | 0.8176 | 0.0691 |
| EPHB4       | 0.7456 | 1.0595 | 0.7182 | 0.7472 | 0.8176 | 0.0809 |
| RP11-529I10 | 0.8400 | 1.0168 | 0.7381 | 0.6757 | 0.8176 | 0.0745 |
| ORC6L       | 0.6769 | 1.0923 | 0.8653 | 0.6360 | 0.8176 | 0.1043 |
| METTL13     | 0.6785 | 1.0895 | 0.8100 | 0.6925 | 0.8176 | 0.0953 |
| ISCA1L      | 0.7028 | 0.9673 | 1.0167 | 0.5840 | 0.8177 | 0.1040 |
| LOC1001338  | 0.7518 | 1.0468 | 0.7567 | 0.7157 | 0.8177 | 0.0769 |
| NSUN2       | 0.6094 | 1.0363 | 0.8502 | 0.7751 | 0.8177 | 0.0885 |
| BET1        | 0.7459 | 1.0481 | 0.7673 | 0.7097 | 0.8177 | 0.0777 |
| DBN1        | 0.6836 | 1.0392 | 0.8444 | 0.7039 | 0.8178 | 0.0820 |
| DHRS4       | 0.6568 | 1.2177 | 0.7681 | 0.6286 | 0.8178 | 0.1367 |
| RHOG        | 0.6804 | 1.0050 | 0.8632 | 0.7227 | 0.8178 | 0.0736 |
| KIAA1712    | 0.7070 | 0.9823 | 0.8581 | 0.7241 | 0.8179 | 0.0644 |
| C5orf37     | 0.7947 | 1.0260 | 0.7970 | 0.6539 | 0.8179 | 0.0770 |
| PDCD2       | 0.6951 | 1.0230 | 0.8733 | 0.6801 | 0.8179 | 0.0813 |
| CHD1        | 0.6238 | 0.9680 | 1.0347 | 0.6453 | 0.8179 | 0.1069 |
| CCDC94      | 0.7700 | 0.8608 | 0.9075 | 0.7336 | 0.8180 | 0.0401 |
| MCM8        | 0.6347 | 1.0538 | 0.8332 | 0.7501 | 0.8180 | 0.0885 |
| HSPBL2      | 0.6196 | 1.1379 | 0.9016 | 0.6130 | 0.8180 | 0.1261 |

|           |        |        |        |        |        |        |
|-----------|--------|--------|--------|--------|--------|--------|
| C16orf58  | 0.8126 | 0.9970 | 0.8171 | 0.6459 | 0.8181 | 0.0717 |
| CTH       | 0.8174 | 0.9617 | 0.7641 | 0.7299 | 0.8183 | 0.0511 |
| SAE1      | 0.6283 | 1.0712 | 0.8872 | 0.6868 | 0.8184 | 0.1009 |
| CERK      | 0.7530 | 0.9712 | 0.8362 | 0.7132 | 0.8184 | 0.0570 |
| RTCD1     | 0.6995 | 0.9648 | 0.9767 | 0.6329 | 0.8185 | 0.0890 |
| GRPEL1    | 0.7290 | 1.0534 | 0.7991 | 0.6926 | 0.8185 | 0.0814 |
| CD58      | 0.6865 | 0.8719 | 0.9948 | 0.7215 | 0.8187 | 0.0712 |
| METRNL    | 0.7778 | 0.9345 | 0.8089 | 0.7536 | 0.8187 | 0.0402 |
| MED8      | 0.7312 | 1.0519 | 0.7857 | 0.7060 | 0.8187 | 0.0795 |
| ACOT2     | 0.7043 | 1.1134 | 0.8354 | 0.6221 | 0.8188 | 0.1076 |
| ACTR3     | 0.6854 | 0.8848 | 1.0959 | 0.6093 | 0.8189 | 0.1091 |
| FAM104B   | 0.7898 | 0.8895 | 0.8368 | 0.7594 | 0.8189 | 0.0284 |
| NLN       | 0.6230 | 1.1016 | 0.8739 | 0.6772 | 0.8189 | 0.1086 |
| CEP152    | 0.6721 | 0.9579 | 0.8984 | 0.7476 | 0.8190 | 0.0660 |
| RAB23     | 0.6769 | 0.9505 | 0.9048 | 0.7438 | 0.8190 | 0.0649 |
| DYM       | 0.6582 | 1.1847 | 0.7816 | 0.6516 | 0.8190 | 0.1255 |
| CCDC125   | 0.8207 | 0.8991 | 0.9224 | 0.6342 | 0.8191 | 0.0654 |
| ARS2      | 0.6371 | 1.2647 | 0.7813 | 0.5933 | 0.8191 | 0.1539 |
| MUTED     | 0.7540 | 0.9575 | 0.8674 | 0.6975 | 0.8191 | 0.0581 |
| FBXL10    | 0.6553 | 1.0198 | 0.8789 | 0.7226 | 0.8191 | 0.0816 |
| DACT3     | 0.6986 | 1.0587 | 0.7782 | 0.7412 | 0.8192 | 0.0815 |
| PIGF      | 0.7667 | 0.9808 | 0.8480 | 0.6812 | 0.8192 | 0.0637 |
| ZNF232    | 0.6762 | 1.0170 | 0.9190 | 0.6646 | 0.8192 | 0.0882 |
| CBY1      | 0.6715 | 1.0663 | 0.8098 | 0.7293 | 0.8192 | 0.0871 |
| CCDC15    | 0.6989 | 1.0271 | 0.8234 | 0.7280 | 0.8193 | 0.0742 |
| IRX5      | 0.6522 | 1.0407 | 0.9410 | 0.6436 | 0.8194 | 0.1011 |
| COX4NB    | 0.7215 | 1.0317 | 0.8400 | 0.6845 | 0.8194 | 0.0781 |
| FLJ20125  | 0.6193 | 1.0692 | 0.8626 | 0.7265 | 0.8194 | 0.0970 |
| TRMT11    | 0.6875 | 0.9704 | 0.8697 | 0.7503 | 0.8195 | 0.0629 |
| CARD10    | 0.5974 | 1.0313 | 0.8720 | 0.7774 | 0.8195 | 0.0907 |
| LOC644254 | 0.7689 | 0.8872 | 0.8370 | 0.7851 | 0.8195 | 0.0268 |
| DCP1A     | 0.7410 | 1.0943 | 0.7035 | 0.7396 | 0.8196 | 0.0920 |
| LOC388564 | 0.6650 | 1.1801 | 0.7925 | 0.6410 | 0.8196 | 0.1247 |
| AVEN      | 0.7014 | 0.8944 | 0.9576 | 0.7252 | 0.8197 | 0.0629 |
| MEMO1     | 0.7629 | 1.0068 | 0.8203 | 0.6887 | 0.8197 | 0.0679 |
| NLE1      | 0.7453 | 0.9387 | 0.8830 | 0.7117 | 0.8197 | 0.0543 |
| HMG2      | 0.6666 | 0.9689 | 0.9218 | 0.7214 | 0.8197 | 0.0740 |
| STAM      | 0.6674 | 1.0885 | 0.8741 | 0.6487 | 0.8197 | 0.1031 |
| XPO7      | 0.6646 | 1.0211 | 0.7945 | 0.7987 | 0.8197 | 0.0740 |
| DNAJB11   | 0.7300 | 1.1457 | 0.7296 | 0.6736 | 0.8197 | 0.1094 |
| PRRC1     | 0.8225 | 1.0712 | 0.8822 | 0.5030 | 0.8197 | 0.1181 |
| LOC643988 | 0.7642 | 0.8728 | 0.9272 | 0.7148 | 0.8197 | 0.0487 |
| VPS33B    | 0.8567 | 1.0471 | 0.7667 | 0.6086 | 0.8198 | 0.0915 |
| LOC728263 | 0.7287 | 0.9296 | 0.8971 | 0.7241 | 0.8199 | 0.0544 |
| SFT2D3    | 0.6939 | 1.0460 | 0.8270 | 0.7127 | 0.8199 | 0.0809 |
| MRPL52    | 0.6791 | 1.1000 | 0.8788 | 0.6217 | 0.8199 | 0.1084 |

|            |        |        |        |        |        |        |
|------------|--------|--------|--------|--------|--------|--------|
| C2orf56    | 0.6085 | 1.0829 | 0.9122 | 0.6761 | 0.8199 | 0.1092 |
| NDUFS3     | 0.6433 | 1.0228 | 0.9066 | 0.7071 | 0.8199 | 0.0878 |
| TADA1L     | 0.7146 | 1.0009 | 0.9237 | 0.6407 | 0.8200 | 0.0850 |
| NT5M       | 0.7199 | 0.9067 | 0.8400 | 0.8133 | 0.8200 | 0.0387 |
| GLCE       | 0.7254 | 1.0347 | 0.8232 | 0.6967 | 0.8200 | 0.0765 |
| TM9SF4     | 0.7183 | 1.1198 | 0.7345 | 0.7076 | 0.8200 | 0.1001 |
| MARK1      | 0.7723 | 0.9766 | 0.8354 | 0.6960 | 0.8201 | 0.0595 |
| ABCF2      | 0.6292 | 1.1530 | 0.8066 | 0.6917 | 0.8201 | 0.1169 |
| LOC389049  | 0.7027 | 1.0625 | 0.8390 | 0.6764 | 0.8202 | 0.0883 |
| ZDHHC13    | 0.6770 | 1.0491 | 0.8583 | 0.6964 | 0.8202 | 0.0865 |
| PPP2R2C    | 0.7991 | 0.9844 | 0.7572 | 0.7402 | 0.8202 | 0.0561 |
| RHOA       | 0.7032 | 0.9878 | 1.0208 | 0.5697 | 0.8204 | 0.1098 |
| LOC441150  | 0.8518 | 0.9764 | 0.7829 | 0.6707 | 0.8205 | 0.0640 |
| LOC729375  | 0.6527 | 1.0437 | 0.9048 | 0.6808 | 0.8205 | 0.0934 |
| SMARCB1    | 0.6566 | 1.1244 | 0.7977 | 0.7032 | 0.8205 | 0.1055 |
| SNAP29     | 0.7525 | 1.1086 | 0.7705 | 0.6505 | 0.8205 | 0.0996 |
| TCEA3      | 0.6484 | 1.0830 | 0.8742 | 0.6765 | 0.8205 | 0.1009 |
| TMTC4      | 0.6523 | 1.0322 | 0.8614 | 0.7364 | 0.8206 | 0.0826 |
| MAP4K5     | 0.7696 | 0.9604 | 0.8362 | 0.7163 | 0.8206 | 0.0527 |
| ILF3       | 0.6358 | 1.1592 | 0.8134 | 0.6743 | 0.8207 | 0.1191 |
| GATAD2A    | 0.7155 | 1.1691 | 0.7844 | 0.6138 | 0.8207 | 0.1213 |
| LZTR1      | 0.6949 | 1.0796 | 0.8307 | 0.6778 | 0.8208 | 0.0928 |
| H2AFZ      | 0.7209 | 1.0603 | 0.8768 | 0.6254 | 0.8208 | 0.0952 |
| MRPL51     | 0.7233 | 1.0176 | 0.9280 | 0.6147 | 0.8209 | 0.0923 |
| MTMR15     | 0.7518 | 1.0719 | 0.7300 | 0.7299 | 0.8209 | 0.0838 |
| ZNF559     | 0.8375 | 0.9471 | 0.8441 | 0.6552 | 0.8210 | 0.0607 |
| LOC1001298 | 0.7522 | 0.8082 | 1.0687 | 0.6551 | 0.8210 | 0.0884 |
| C1QL4      | 0.8055 | 0.9172 | 0.7715 | 0.7901 | 0.8211 | 0.0328 |
| AVL9       | 0.7404 | 0.9996 | 0.8727 | 0.6717 | 0.8211 | 0.0727 |
| DRAM1      | 0.6961 | 0.9856 | 0.8065 | 0.7962 | 0.8211 | 0.0602 |
| CHKA       | 0.6994 | 1.0347 | 0.8415 | 0.7088 | 0.8211 | 0.0783 |
| RHOF       | 0.8593 | 0.9257 | 0.9384 | 0.5612 | 0.8211 | 0.0884 |
| LOC642033  | 0.6105 | 1.0351 | 0.9451 | 0.6939 | 0.8211 | 0.1007 |
| EAF1       | 0.7483 | 0.8903 | 1.0124 | 0.6336 | 0.8212 | 0.0826 |
| GARNL4     | 0.7411 | 1.0392 | 0.7782 | 0.7263 | 0.8212 | 0.0735 |
| LOC1001309 | 0.7073 | 1.2098 | 0.7226 | 0.6451 | 0.8212 | 0.1306 |
| RIPK5      | 0.7316 | 0.9582 | 0.8229 | 0.7721 | 0.8212 | 0.0493 |
| THG1L      | 0.6415 | 1.1296 | 0.8486 | 0.6655 | 0.8213 | 0.1127 |
| GPHN       | 0.6046 | 1.0878 | 0.8370 | 0.7560 | 0.8214 | 0.1010 |
| ZDHHC17    | 0.9138 | 0.8466 | 0.7547 | 0.7704 | 0.8214 | 0.0368 |
| WDR68      | 0.6615 | 1.0140 | 0.9506 | 0.6597 | 0.8214 | 0.0938 |
| LOC441191  | 0.6609 | 1.0774 | 0.8000 | 0.7477 | 0.8215 | 0.0900 |
| ASTE1      | 0.7666 | 0.9283 | 0.8892 | 0.7020 | 0.8215 | 0.0527 |
| SFRS13A    | 0.6739 | 1.0515 | 0.8914 | 0.6696 | 0.8216 | 0.0925 |
| JUB        | 0.7256 | 0.9552 | 0.8135 | 0.7922 | 0.8216 | 0.0483 |
| CTNBL1     | 0.6846 | 1.1636 | 0.7505 | 0.6878 | 0.8216 | 0.1150 |

|            |        |        |        |        |        |        |
|------------|--------|--------|--------|--------|--------|--------|
| FAM44B     | 0.7962 | 1.0224 | 0.8364 | 0.6315 | 0.8216 | 0.0803 |
| LOC1001322 | 0.6798 | 1.1404 | 0.8178 | 0.6490 | 0.8218 | 0.1124 |
| LOC730167  | 0.5588 | 1.0888 | 1.0007 | 0.6387 | 0.8218 | 0.1310 |
| C9orf9     | 0.7532 | 1.0863 | 0.7702 | 0.6775 | 0.8218 | 0.0904 |
| FANCC      | 0.7761 | 0.8680 | 0.9560 | 0.6873 | 0.8219 | 0.0580 |
| ATG4C      | 0.6409 | 1.0803 | 0.7982 | 0.7681 | 0.8219 | 0.0926 |
| C19orf60   | 0.6737 | 1.1901 | 0.7852 | 0.6385 | 0.8219 | 0.1267 |
| DHX29      | 0.7144 | 1.0010 | 0.8772 | 0.6951 | 0.8219 | 0.0723 |
| SNORA76    | 0.6097 | 0.8690 | 0.8437 | 0.9655 | 0.8220 | 0.0755 |
| ENTPD7     | 0.6661 | 1.0145 | 0.8766 | 0.7308 | 0.8220 | 0.0778 |
| CNOT8      | 0.7381 | 0.9694 | 0.9176 | 0.6630 | 0.8220 | 0.0726 |
| PSMC5      | 0.7751 | 0.9181 | 1.0145 | 0.5806 | 0.8221 | 0.0943 |
| DGCR8      | 0.6762 | 1.1744 | 0.8436 | 0.5940 | 0.8221 | 0.1284 |
| KIF1A      | 0.7095 | 1.1491 | 0.7698 | 0.6601 | 0.8221 | 0.1113 |
| ZMYM1      | 0.7476 | 1.0116 | 0.8616 | 0.6678 | 0.8221 | 0.0746 |
| RBMX2      | 0.7792 | 0.9173 | 0.9545 | 0.6377 | 0.8222 | 0.0721 |
| PRR3       | 0.6810 | 0.9632 | 0.8858 | 0.7588 | 0.8222 | 0.0632 |
| NASP       | 0.6750 | 1.0817 | 0.8115 | 0.7206 | 0.8222 | 0.0910 |
| FHOD1      | 0.8080 | 1.0169 | 0.7688 | 0.6952 | 0.8222 | 0.0690 |
| SNRPB2     | 0.6813 | 1.0943 | 0.8794 | 0.6339 | 0.8222 | 0.1051 |
| C17orf81   | 0.7566 | 1.0875 | 0.7917 | 0.6531 | 0.8222 | 0.0932 |
| ATIC       | 0.6621 | 1.1712 | 0.8848 | 0.5713 | 0.8224 | 0.1336 |
| PDGFRL     | 0.7769 | 1.0559 | 0.7199 | 0.7369 | 0.8224 | 0.0787 |
| CCDC71     | 0.7486 | 1.0401 | 0.7471 | 0.7539 | 0.8224 | 0.0726 |
| NSUN5B     | 0.6870 | 0.9925 | 0.9084 | 0.7020 | 0.8225 | 0.0759 |
| BCAS4      | 0.6957 | 1.0069 | 0.8340 | 0.7533 | 0.8225 | 0.0677 |
| HNRPDL     | 0.7118 | 1.1041 | 0.8061 | 0.6680 | 0.8225 | 0.0982 |
| SGK3       | 0.7048 | 0.9606 | 0.8345 | 0.7902 | 0.8225 | 0.0533 |
| PSMC1      | 0.6173 | 1.0518 | 0.8819 | 0.7394 | 0.8226 | 0.0936 |
| DNAJC22    | 0.6884 | 1.0867 | 0.7852 | 0.7303 | 0.8226 | 0.0902 |
| CENPO      | 0.6525 | 0.9188 | 0.8613 | 0.8579 | 0.8226 | 0.0584 |
| SDCCAG10   | 0.7172 | 0.9581 | 0.9320 | 0.6833 | 0.8227 | 0.0712 |
| MAP2K6     | 0.7162 | 0.9970 | 0.8233 | 0.7542 | 0.8227 | 0.0622 |
| TMEM149    | 0.6739 | 1.0138 | 0.7481 | 0.8550 | 0.8227 | 0.0738 |
| SMARCC1    | 0.8075 | 0.9840 | 0.8366 | 0.6629 | 0.8228 | 0.0658 |
| LOC729647  | 0.7423 | 0.9673 | 0.8782 | 0.7034 | 0.8228 | 0.0610 |
| PPRC1      | 0.5500 | 1.2000 | 0.8789 | 0.6628 | 0.8229 | 0.1430 |
| UGT2B7     | 0.5773 | 1.1547 | 0.9563 | 0.6038 | 0.8230 | 0.1403 |
| C9orf41    | 0.7501 | 0.9343 | 0.8697 | 0.7379 | 0.8230 | 0.0475 |
| MBD3       | 0.7837 | 1.0015 | 0.8060 | 0.7011 | 0.8231 | 0.0636 |
| MMP11      | 0.8005 | 0.9542 | 0.7580 | 0.7797 | 0.8231 | 0.0446 |
| TPM3       | 0.6163 | 1.1311 | 0.8320 | 0.7132 | 0.8231 | 0.1117 |
| NEIL2      | 0.9461 | 0.8776 | 0.9112 | 0.5577 | 0.8231 | 0.0896 |
| SAFB2      | 0.6634 | 1.1168 | 0.8651 | 0.6476 | 0.8232 | 0.1097 |
| THAP10     | 0.6235 | 1.1060 | 0.8248 | 0.7386 | 0.8232 | 0.1029 |
| ASAP1      | 0.6538 | 1.1533 | 0.7425 | 0.7437 | 0.8233 | 0.1120 |

|            |        |        |        |        |        |        |
|------------|--------|--------|--------|--------|--------|--------|
| CCNT1      | 0.5298 | 1.0967 | 0.9535 | 0.7135 | 0.8234 | 0.1258 |
| MRPS9      | 0.5857 | 1.2170 | 0.8002 | 0.6909 | 0.8234 | 0.1383 |
| AGPAT2     | 0.7802 | 0.9908 | 0.8419 | 0.6808 | 0.8234 | 0.0649 |
| ZNF295     | 0.6305 | 1.0684 | 0.8891 | 0.7059 | 0.8235 | 0.0980 |
| SNORD57    | 0.6827 | 0.8627 | 0.9403 | 0.8083 | 0.8235 | 0.0542 |
| ABHD12     | 0.7657 | 0.9706 | 0.8433 | 0.7146 | 0.8236 | 0.0557 |
| IL27RA     | 0.7124 | 0.9716 | 0.8423 | 0.7681 | 0.8236 | 0.0561 |
| USP46      | 0.7061 | 1.1165 | 0.7856 | 0.6862 | 0.8236 | 0.1000 |
| NUBP1      | 0.6851 | 1.1858 | 0.7888 | 0.6348 | 0.8236 | 0.1249 |
| IDH3B      | 0.6461 | 1.0970 | 0.8535 | 0.6982 | 0.8237 | 0.1012 |
| C10orf57   | 0.9315 | 1.0246 | 0.7421 | 0.5968 | 0.8237 | 0.0958 |
| MGC3196    | 0.6527 | 1.0576 | 0.8816 | 0.7031 | 0.8237 | 0.0921 |
| LOC732007  | 0.6555 | 1.1993 | 0.8190 | 0.6213 | 0.8238 | 0.1324 |
| PLEKHA3    | 0.7426 | 1.0907 | 0.7759 | 0.6858 | 0.8238 | 0.0909 |
| TOM1L1     | 0.5396 | 1.0621 | 0.8930 | 0.8005 | 0.8238 | 0.1091 |
| FAM114A1   | 0.6711 | 1.1208 | 0.8206 | 0.6829 | 0.8239 | 0.1046 |
| LOC93622   | 0.7106 | 1.0037 | 0.8275 | 0.7537 | 0.8239 | 0.0646 |
| C7orf41    | 0.6915 | 1.0398 | 0.8669 | 0.6974 | 0.8239 | 0.0827 |
| TUB        | 0.7379 | 1.0009 | 0.8437 | 0.7132 | 0.8239 | 0.0654 |
| LOC647719  | 0.7191 | 0.9025 | 0.9546 | 0.7194 | 0.8239 | 0.0613 |
| LOC389873  | 0.5819 | 1.2040 | 0.7945 | 0.7155 | 0.8240 | 0.1341 |
| COG8       | 0.7712 | 1.0456 | 0.8126 | 0.6667 | 0.8240 | 0.0800 |
| PMS2       | 0.6157 | 1.0117 | 0.9428 | 0.7259 | 0.8240 | 0.0924 |
| MLF2       | 0.7233 | 1.0984 | 0.8121 | 0.6624 | 0.8240 | 0.0965 |
| ELAC2      | 0.6645 | 1.1429 | 0.8364 | 0.6524 | 0.8241 | 0.1143 |
| LOC652388  | 0.7383 | 1.2099 | 0.6670 | 0.6811 | 0.8241 | 0.1295 |
| ACAA2      | 0.7975 | 0.8981 | 0.8105 | 0.7903 | 0.8241 | 0.0250 |
| ZNRD1      | 0.6647 | 1.1172 | 0.8517 | 0.6629 | 0.8241 | 0.1073 |
| ARID2      | 0.7030 | 1.0209 | 0.8593 | 0.7132 | 0.8241 | 0.0747 |
| THAP11     | 0.6391 | 1.1099 | 0.8821 | 0.6654 | 0.8241 | 0.1097 |
| WASF3      | 0.6714 | 1.1378 | 0.8104 | 0.6774 | 0.8242 | 0.1093 |
| SLC7A1     | 0.7203 | 1.1680 | 0.7929 | 0.6158 | 0.8243 | 0.1202 |
| PHTF2      | 0.7204 | 1.1056 | 0.8182 | 0.6532 | 0.8243 | 0.0997 |
| LOC1001313 | 0.7692 | 0.9336 | 0.8647 | 0.7302 | 0.8244 | 0.0461 |
| PER3       | 0.5443 | 1.1153 | 0.8902 | 0.7479 | 0.8244 | 0.1202 |
| R3HDM1     | 0.6841 | 1.0264 | 0.8202 | 0.7671 | 0.8244 | 0.0729 |
| DHX38      | 0.8060 | 0.8833 | 0.9002 | 0.7083 | 0.8245 | 0.0438 |
| TARBP1     | 0.7204 | 1.0746 | 0.7061 | 0.7968 | 0.8245 | 0.0857 |
| LOC440145  | 0.7572 | 0.8879 | 0.9910 | 0.6618 | 0.8245 | 0.0723 |
| TBC1D23    | 0.6453 | 0.9905 | 0.9291 | 0.7332 | 0.8245 | 0.0811 |
| GPRC5C     | 0.8221 | 0.8884 | 0.8410 | 0.7467 | 0.8245 | 0.0295 |
| SCYL1      | 0.7907 | 0.9767 | 0.8708 | 0.6602 | 0.8246 | 0.0667 |
| DNAJC13    | 0.7861 | 1.0626 | 0.7194 | 0.7303 | 0.8246 | 0.0807 |
| RRP1       | 0.8109 | 0.9013 | 0.8133 | 0.7730 | 0.8246 | 0.0272 |
| ATP6V1C1   | 0.8054 | 0.9601 | 0.8197 | 0.7134 | 0.8247 | 0.0509 |
| ANKFY1     | 0.7550 | 1.1059 | 0.7318 | 0.7067 | 0.8249 | 0.0942 |

|            |        |        |        |        |        |        |
|------------|--------|--------|--------|--------|--------|--------|
| ATG10      | 0.6993 | 1.0967 | 0.7905 | 0.7130 | 0.8249 | 0.0928 |
| CSRP1      | 0.5128 | 1.1936 | 0.8375 | 0.7557 | 0.8249 | 0.1409 |
| MRS2       | 0.5943 | 1.2140 | 0.9086 | 0.5831 | 0.8250 | 0.1500 |
| DCUN1D1    | 0.7392 | 0.9811 | 0.8251 | 0.7547 | 0.8250 | 0.0553 |
| LOC645726  | 0.8166 | 0.8971 | 0.8137 | 0.7727 | 0.8250 | 0.0260 |
| SNX6       | 0.7673 | 1.0091 | 0.7155 | 0.8085 | 0.8251 | 0.0642 |
| LOC654135  | 0.7113 | 1.0143 | 0.8615 | 0.7135 | 0.8251 | 0.0722 |
| GBAS       | 0.7491 | 1.1427 | 0.8160 | 0.5929 | 0.8252 | 0.1157 |
| PHAX       | 0.6663 | 1.0391 | 0.9603 | 0.6354 | 0.8253 | 0.1022 |
| TBL2       | 0.6516 | 1.0449 | 0.8872 | 0.7174 | 0.8253 | 0.0884 |
| FSCN1      | 0.7786 | 1.0129 | 0.8006 | 0.7092 | 0.8254 | 0.0655 |
| UBE2M      | 0.7024 | 1.0880 | 0.8969 | 0.6142 | 0.8254 | 0.1056 |
| CDC2L6     | 0.5673 | 1.3082 | 0.8053 | 0.6208 | 0.8254 | 0.1688 |
| C1orf177   | 0.8129 | 0.8038 | 0.9496 | 0.7352 | 0.8254 | 0.0449 |
| MTERF      | 0.6775 | 1.0621 | 0.8216 | 0.7406 | 0.8254 | 0.0842 |
| CASC5      | 0.7657 | 0.9007 | 0.8580 | 0.7774 | 0.8254 | 0.0324 |
| C3orf31    | 0.5647 | 1.1649 | 0.8638 | 0.7084 | 0.8254 | 0.1286 |
| LOC1001296 | 0.7674 | 0.8797 | 0.8603 | 0.7944 | 0.8255 | 0.0266 |
| TINP1      | 0.6781 | 0.9953 | 0.9626 | 0.6661 | 0.8255 | 0.0889 |
| SH3BP1     | 0.7985 | 0.9843 | 0.7076 | 0.8117 | 0.8255 | 0.0578 |
| COMMD5     | 0.7008 | 1.0416 | 0.8537 | 0.7060 | 0.8255 | 0.0803 |
| EIF3M      | 0.6496 | 1.1355 | 0.8757 | 0.6412 | 0.8255 | 0.1167 |
| LOC644131  | 0.7972 | 0.8051 | 1.0840 | 0.6159 | 0.8255 | 0.0966 |
| TRIM25     | 0.8647 | 1.0030 | 0.7774 | 0.6573 | 0.8256 | 0.0728 |
| MDM4       | 0.7758 | 0.9561 | 0.8289 | 0.7417 | 0.8256 | 0.0470 |
| PGAM1      | 0.5765 | 1.1525 | 0.8927 | 0.6808 | 0.8256 | 0.1273 |
| MLLT6      | 0.6028 | 1.1653 | 0.8204 | 0.7144 | 0.8257 | 0.1216 |
| FLJ10374   | 0.6252 | 1.0944 | 0.8056 | 0.7777 | 0.8257 | 0.0979 |
| FUCA2      | 0.7292 | 1.0046 | 0.8664 | 0.7028 | 0.8257 | 0.0696 |
| DKFZP56400 | 0.7065 | 1.0401 | 0.8351 | 0.7214 | 0.8258 | 0.0770 |
| C1orf85    | 0.7393 | 1.1252 | 0.7989 | 0.6397 | 0.8258 | 0.1051 |
| SMG7       | 0.7739 | 1.0684 | 0.8031 | 0.6582 | 0.8259 | 0.0867 |
| KHDRBS3    | 0.7306 | 1.0159 | 0.8553 | 0.7022 | 0.8260 | 0.0715 |
| SMARCA4    | 0.6757 | 1.1000 | 0.8551 | 0.6731 | 0.8260 | 0.1008 |
| PELO       | 0.6431 | 1.2485 | 0.8476 | 0.5648 | 0.8260 | 0.1529 |
| LOC652183  | 0.6686 | 1.0900 | 0.8140 | 0.7317 | 0.8260 | 0.0929 |
| LSM10      | 0.6318 | 1.2072 | 0.8332 | 0.6322 | 0.8261 | 0.1356 |
| ATP8B1     | 0.7763 | 0.9790 | 0.7990 | 0.7502 | 0.8261 | 0.0519 |
| TTC38      | 0.8192 | 0.9861 | 0.8219 | 0.6774 | 0.8262 | 0.0631 |
| C19orf43   | 0.7167 | 1.0342 | 0.8253 | 0.7286 | 0.8262 | 0.0735 |
| ORC2L      | 0.5798 | 1.0144 | 0.9210 | 0.7896 | 0.8262 | 0.0942 |
| ADSL       | 0.6581 | 1.2933 | 0.7968 | 0.5570 | 0.8263 | 0.1633 |
| RBM34      | 0.6317 | 0.9956 | 1.0053 | 0.6725 | 0.8263 | 0.1009 |
| CA11       | 0.7059 | 0.9901 | 0.8106 | 0.7988 | 0.8263 | 0.0594 |
| LOC654053  | 0.8397 | 0.9356 | 0.8598 | 0.6704 | 0.8264 | 0.0559 |
| PSMD3      | 0.6621 | 1.1553 | 0.7588 | 0.7293 | 0.8264 | 0.1115 |



|            |        |        |        |        |        |        |
|------------|--------|--------|--------|--------|--------|--------|
| GNG4       | 0.7579 | 1.1055 | 0.7138 | 0.7286 | 0.8265 | 0.0935 |
| RFXANK     | 0.7525 | 1.0182 | 0.7946 | 0.7407 | 0.8265 | 0.0649 |
| CUL1       | 0.6181 | 1.0576 | 0.8845 | 0.7459 | 0.8265 | 0.0943 |
| RPUSD3     | 0.7883 | 1.0833 | 0.8071 | 0.6276 | 0.8266 | 0.0946 |
| RBM45      | 0.6590 | 1.0002 | 0.9594 | 0.6881 | 0.8267 | 0.0890 |
| SETD6      | 0.7947 | 0.9281 | 0.8616 | 0.7225 | 0.8267 | 0.0441 |
| MCAT       | 0.7269 | 1.0933 | 0.8044 | 0.6822 | 0.8267 | 0.0924 |
| ADM        | 0.7690 | 0.8911 | 0.8210 | 0.8257 | 0.8267 | 0.0250 |
| LRRC28     | 0.6601 | 1.0689 | 0.8404 | 0.7375 | 0.8267 | 0.0888 |
| LOC1001335 | 0.7500 | 1.1978 | 0.6815 | 0.6776 | 0.8267 | 0.1248 |
| UBE2I      | 0.6518 | 1.1658 | 0.8304 | 0.6590 | 0.8268 | 0.1203 |
| SH3KBP1    | 0.6611 | 1.0779 | 0.8486 | 0.7196 | 0.8268 | 0.0924 |
| LOC645979  | 0.5829 | 1.1287 | 0.9521 | 0.6439 | 0.8269 | 0.1290 |
| ELOF1      | 0.7172 | 1.0705 | 0.9161 | 0.6038 | 0.8269 | 0.1037 |
| EIF2B4     | 0.6419 | 1.1324 | 0.8807 | 0.6528 | 0.8270 | 0.1158 |
| HEG1       | 0.7549 | 0.8786 | 0.8038 | 0.8708 | 0.8270 | 0.0293 |
| C17orf93   | 0.6228 | 1.0868 | 0.9335 | 0.6649 | 0.8270 | 0.1106 |
| TIMM22     | 0.6350 | 1.1187 | 0.7931 | 0.7614 | 0.8270 | 0.1030 |
| LOC1001317 | 0.7436 | 1.0881 | 0.8008 | 0.6758 | 0.8271 | 0.0907 |
| LOC1001333 | 0.5806 | 1.1482 | 1.0043 | 0.5752 | 0.8271 | 0.1468 |
| AAMP       | 0.7688 | 1.0660 | 0.8555 | 0.6180 | 0.8271 | 0.0935 |
| NUDT9      | 0.7145 | 1.1054 | 0.8458 | 0.6429 | 0.8271 | 0.1018 |
| SCAMP1     | 0.7187 | 1.0445 | 0.8621 | 0.6833 | 0.8272 | 0.0821 |
| PLLP       | 0.7814 | 1.0214 | 0.7963 | 0.7097 | 0.8272 | 0.0674 |
| TAF12      | 0.7775 | 1.1944 | 0.7209 | 0.6161 | 0.8272 | 0.1269 |
| PPP1R3D    | 0.8090 | 1.0293 | 0.8344 | 0.6363 | 0.8272 | 0.0804 |
| ZNF830     | 0.7822 | 0.9001 | 0.8719 | 0.7550 | 0.8273 | 0.0348 |
| ASPSCR1    | 0.7147 | 1.0750 | 0.8597 | 0.6598 | 0.8273 | 0.0927 |
| FLJ20628   | 0.6867 | 1.0464 | 0.8947 | 0.6816 | 0.8273 | 0.0883 |
| MRPL17     | 0.8097 | 0.9916 | 0.8276 | 0.6805 | 0.8274 | 0.0638 |
| LOC1001285 | 0.8008 | 0.9650 | 0.8285 | 0.7152 | 0.8274 | 0.0518 |
| POLR3B     | 0.6914 | 1.1524 | 0.7644 | 0.7014 | 0.8274 | 0.1095 |
| LOC150223  | 0.7588 | 1.0464 | 0.8105 | 0.6941 | 0.8274 | 0.0768 |
| RAB26      | 0.6624 | 1.1360 | 0.9039 | 0.6081 | 0.8276 | 0.1212 |
| C15orf44   | 0.7585 | 1.0414 | 0.8227 | 0.6882 | 0.8277 | 0.0763 |
| CDKAL1     | 0.6605 | 1.0519 | 0.8748 | 0.7235 | 0.8277 | 0.0872 |
| MGAT2      | 0.6762 | 1.0442 | 0.8992 | 0.6914 | 0.8278 | 0.0883 |
| SLC39A6    | 0.6716 | 1.1336 | 0.8298 | 0.6760 | 0.8278 | 0.1084 |
| B9D2       | 0.7114 | 1.0120 | 0.8698 | 0.7178 | 0.8278 | 0.0715 |
| DFFA       | 0.6058 | 1.0722 | 0.8934 | 0.7397 | 0.8278 | 0.1004 |
| STEAP3     | 0.7023 | 1.0143 | 0.8346 | 0.7600 | 0.8278 | 0.0678 |
| ALG14      | 0.6376 | 1.2342 | 0.8400 | 0.5994 | 0.8278 | 0.1454 |
| LOC1001338 | 0.6881 | 0.9462 | 0.8430 | 0.8344 | 0.8279 | 0.0531 |
| SDCCAG1    | 0.6907 | 1.0476 | 0.8262 | 0.7473 | 0.8279 | 0.0783 |
| ETFB       | 0.6095 | 1.3176 | 0.7468 | 0.6379 | 0.8280 | 0.1659 |
| DRAP1      | 0.7810 | 1.0956 | 0.7933 | 0.6421 | 0.8280 | 0.0955 |

|            |        |        |        |        |        |        |
|------------|--------|--------|--------|--------|--------|--------|
| DNAJC7     | 0.6965 | 1.1521 | 0.7662 | 0.6974 | 0.8280 | 0.1092 |
| SGTA       | 0.7139 | 1.0176 | 0.8042 | 0.7767 | 0.8281 | 0.0659 |
| FDX1       | 0.7393 | 0.8678 | 0.9690 | 0.7363 | 0.8281 | 0.0561 |
| SFRS4      | 0.6006 | 1.2193 | 0.8239 | 0.6688 | 0.8282 | 0.1385 |
| SLC6A9     | 0.7512 | 0.9420 | 0.8338 | 0.7857 | 0.8282 | 0.0416 |
| SPATA2L    | 0.7304 | 1.0469 | 0.8178 | 0.7179 | 0.8282 | 0.0762 |
| RPRD1A     | 0.5875 | 1.3814 | 0.7145 | 0.6296 | 0.8283 | 0.1863 |
| PSMC2      | 0.6759 | 1.0819 | 0.8572 | 0.6982 | 0.8283 | 0.0937 |
| SRPX       | 0.7451 | 0.9532 | 0.8811 | 0.7341 | 0.8284 | 0.0534 |
| KENAE      | 0.7316 | 1.0054 | 0.8692 | 0.7076 | 0.8284 | 0.0689 |
| LOC152195  | 0.7649 | 1.0598 | 0.7851 | 0.7040 | 0.8285 | 0.0790 |
| LOC647474  | 0.6211 | 1.0648 | 0.8207 | 0.8075 | 0.8285 | 0.0910 |
| ABHD6      | 0.7976 | 1.1316 | 0.7286 | 0.6564 | 0.8286 | 0.1050 |
| LOC642333  | 0.7235 | 0.9331 | 0.9772 | 0.6805 | 0.8286 | 0.0742 |
| LOC1001341 | 0.6008 | 0.9980 | 0.9130 | 0.8027 | 0.8286 | 0.0858 |
| CPSF4      | 0.7289 | 1.0554 | 0.8389 | 0.6915 | 0.8287 | 0.0818 |
| LOC644237  | 0.6337 | 1.0889 | 0.9064 | 0.6858 | 0.8287 | 0.1050 |
| AIMP2      | 0.6604 | 1.1365 | 0.9185 | 0.5994 | 0.8287 | 0.1237 |
| ARG2       | 0.8157 | 1.0453 | 0.8008 | 0.6532 | 0.8287 | 0.0810 |
| DHX40      | 0.7171 | 1.0786 | 0.8306 | 0.6887 | 0.8287 | 0.0887 |
| THEM2      | 0.6847 | 1.1049 | 0.7696 | 0.7558 | 0.8288 | 0.0939 |
| ITGB2      | 0.7645 | 1.0693 | 0.8085 | 0.6728 | 0.8288 | 0.0850 |
| MSTO1      | 0.7121 | 0.8682 | 1.0029 | 0.7321 | 0.8288 | 0.0676 |
| LOC653110  | 0.8786 | 0.8888 | 0.8193 | 0.7293 | 0.8290 | 0.0366 |
| HGS        | 0.6087 | 1.2277 | 0.7616 | 0.7180 | 0.8290 | 0.1368 |
| NT5C3L     | 0.6688 | 1.1504 | 0.8021 | 0.6949 | 0.8290 | 0.1109 |
| COX8A      | 0.7306 | 1.0883 | 0.7573 | 0.7402 | 0.8291 | 0.0866 |
| ANKRD9     | 0.7349 | 1.1727 | 0.7989 | 0.6101 | 0.8291 | 0.1210 |
| CPD        | 0.7974 | 1.0891 | 0.7646 | 0.6655 | 0.8291 | 0.0911 |
| CENPP      | 0.7523 | 0.8681 | 0.8841 | 0.8121 | 0.8292 | 0.0299 |
| ICAM3      | 0.7018 | 1.2013 | 0.7841 | 0.6294 | 0.8292 | 0.1280 |
| ORC4L      | 0.7212 | 0.8789 | 0.9561 | 0.7604 | 0.8292 | 0.0540 |
| IGBP1      | 0.7962 | 0.9887 | 0.8801 | 0.6518 | 0.8292 | 0.0711 |
| LOC25845   | 0.6744 | 1.1947 | 0.7977 | 0.6503 | 0.8293 | 0.1260 |
| CCDC88C    | 0.6491 | 1.0691 | 0.7027 | 0.8964 | 0.8293 | 0.0960 |
| NUDT16L1   | 0.6805 | 1.1347 | 0.7845 | 0.7176 | 0.8293 | 0.1040 |
| TPD52L1    | 0.6449 | 1.2272 | 0.7798 | 0.6654 | 0.8293 | 0.1359 |
| UBAC1      | 0.6358 | 1.0670 | 0.8158 | 0.7988 | 0.8293 | 0.0890 |
| C3orf37    | 0.7231 | 1.2082 | 0.7702 | 0.6164 | 0.8295 | 0.1303 |
| KBTBD8     | 0.6013 | 1.0203 | 0.9162 | 0.7810 | 0.8297 | 0.0905 |
| ACOT9      | 0.7125 | 1.1132 | 0.8615 | 0.6320 | 0.8298 | 0.1057 |
| STT3A      | 0.8081 | 1.0374 | 0.8120 | 0.6619 | 0.8298 | 0.0775 |
| SEC23IP    | 0.6921 | 1.1216 | 0.8487 | 0.6570 | 0.8298 | 0.1058 |
| CGN        | 0.7395 | 1.1130 | 0.7548 | 0.7123 | 0.8299 | 0.0948 |
| LOC284988  | 0.7128 | 0.9764 | 0.9060 | 0.7245 | 0.8299 | 0.0659 |
| OXSM       | 0.8213 | 0.9605 | 0.8945 | 0.6436 | 0.8300 | 0.0683 |

|           |        |        |        |        |        |        |
|-----------|--------|--------|--------|--------|--------|--------|
| UQCRC1    | 0.7465 | 1.0741 | 0.8168 | 0.6824 | 0.8300 | 0.0859 |
| PNO1      | 0.6583 | 0.9418 | 1.0443 | 0.6756 | 0.8300 | 0.0965 |
| RFX5      | 0.6730 | 1.1833 | 0.7995 | 0.6641 | 0.8300 | 0.1218 |
| CDC6      | 0.7579 | 0.9379 | 0.8372 | 0.7870 | 0.8300 | 0.0395 |
| LOC158160 | 0.9605 | 0.8887 | 0.8368 | 0.6341 | 0.8300 | 0.0700 |
| RAE1      | 0.6648 | 1.1251 | 0.8423 | 0.6879 | 0.8300 | 0.1060 |
| TPRKB     | 0.7912 | 1.0126 | 0.8102 | 0.7063 | 0.8301 | 0.0649 |
| CXorf64   | 0.5151 | 1.0627 | 0.9704 | 0.7722 | 0.8301 | 0.1212 |
| RECQL     | 0.6607 | 1.0316 | 0.9668 | 0.6614 | 0.8301 | 0.0985 |
| LEMD3     | 0.7481 | 1.0972 | 0.7908 | 0.6846 | 0.8301 | 0.0917 |
| ARCN1     | 0.7611 | 1.1209 | 0.7661 | 0.6727 | 0.8302 | 0.0992 |
| SUCLG1    | 0.5991 | 1.0533 | 0.9883 | 0.6805 | 0.8303 | 0.1120 |
| FARS2     | 0.6988 | 1.0886 | 0.8439 | 0.6900 | 0.8303 | 0.0930 |
| UBE1DC1   | 0.6769 | 1.0308 | 0.9382 | 0.6753 | 0.8303 | 0.0910 |
| SNORA25   | 0.6663 | 1.0320 | 0.8496 | 0.7734 | 0.8303 | 0.0770 |
| SKA2      | 0.6729 | 0.9715 | 1.0472 | 0.6297 | 0.8303 | 0.1049 |
| LOC341457 | 0.7502 | 0.9608 | 0.9989 | 0.6115 | 0.8304 | 0.0912 |
| AK2       | 0.6503 | 1.1457 | 0.8819 | 0.6436 | 0.8304 | 0.1188 |
| TUBGCP2   | 0.8432 | 1.1162 | 0.7188 | 0.6438 | 0.8305 | 0.1037 |
| C2orf18   | 0.7517 | 0.9736 | 0.8667 | 0.7306 | 0.8307 | 0.0563 |
| MRPL30    | 0.6445 | 0.9237 | 1.0634 | 0.6912 | 0.8307 | 0.0987 |
| KCNS3     | 0.7484 | 0.9971 | 0.8203 | 0.7574 | 0.8308 | 0.0577 |
| DAZAP1    | 0.7075 | 1.0533 | 0.8465 | 0.7158 | 0.8308 | 0.0807 |
| KLHL18    | 0.7350 | 1.0717 | 0.8230 | 0.6938 | 0.8308 | 0.0847 |
| LOC143543 | 0.7286 | 0.8159 | 1.0308 | 0.7487 | 0.8310 | 0.0692 |
| ZMYND11   | 0.6515 | 1.1434 | 0.8304 | 0.6997 | 0.8312 | 0.1107 |
| TUFM      | 0.6928 | 1.0646 | 0.8696 | 0.6986 | 0.8314 | 0.0879 |
| LOC649553 | 0.5765 | 1.2084 | 0.8294 | 0.7114 | 0.8314 | 0.1359 |
| NDUFV3    | 0.6631 | 1.0782 | 0.9020 | 0.6823 | 0.8314 | 0.0985 |
| RNF14     | 0.7035 | 0.9748 | 0.9903 | 0.6574 | 0.8315 | 0.0878 |
| EIF3A     | 0.6625 | 1.0036 | 1.0672 | 0.5927 | 0.8315 | 0.1193 |
| C1orf31   | 0.7470 | 0.9310 | 1.0288 | 0.6193 | 0.8315 | 0.0917 |
| CCDC90A   | 0.6699 | 0.9752 | 1.0141 | 0.6670 | 0.8316 | 0.0945 |
| UCRC      | 0.6804 | 1.1747 | 0.8431 | 0.6280 | 0.8316 | 0.1232 |
| GRTP1     | 0.8116 | 0.9849 | 0.8778 | 0.6520 | 0.8316 | 0.0697 |
| NIPSNAP3A | 0.8251 | 1.0280 | 0.8255 | 0.6478 | 0.8316 | 0.0777 |
| TWF1      | 0.7248 | 0.9980 | 0.9549 | 0.6489 | 0.8316 | 0.0855 |
| COPB1     | 0.7902 | 1.0206 | 0.8956 | 0.6203 | 0.8317 | 0.0847 |
| NDUFS1    | 0.7029 | 0.9658 | 0.8807 | 0.7774 | 0.8317 | 0.0577 |
| RPUSD2    | 0.6324 | 1.0323 | 0.9503 | 0.7120 | 0.8318 | 0.0950 |
| IPO8      | 0.8138 | 1.1079 | 0.7994 | 0.6060 | 0.8318 | 0.1035 |
| HNRNPL    | 0.6829 | 1.2134 | 0.7566 | 0.6742 | 0.8318 | 0.1285 |
| SLC22A3   | 0.7630 | 1.0214 | 0.8027 | 0.7403 | 0.8318 | 0.0645 |
| AKNA      | 0.8261 | 0.8939 | 0.8040 | 0.8037 | 0.8319 | 0.0213 |
| NSUN5C    | 0.6924 | 1.0065 | 0.8606 | 0.7683 | 0.8320 | 0.0676 |
| MTHFS     | 0.6658 | 1.2303 | 0.8024 | 0.6294 | 0.8320 | 0.1379 |

|            |        |        |        |        |        |        |
|------------|--------|--------|--------|--------|--------|--------|
| ZFYVE20    | 0.7093 | 1.0854 | 0.8546 | 0.6788 | 0.8320 | 0.0928 |
| INO80B     | 0.7506 | 0.9940 | 0.9431 | 0.6404 | 0.8320 | 0.0826 |
| ALG5       | 0.7090 | 0.9611 | 0.9938 | 0.6645 | 0.8321 | 0.0847 |
| NR1H3      | 0.7448 | 0.8888 | 0.8638 | 0.8311 | 0.8321 | 0.0314 |
| TCAM1      | 0.7417 | 1.0247 | 0.8151 | 0.7471 | 0.8321 | 0.0663 |
| TBCB       | 0.7942 | 1.1882 | 0.7274 | 0.6193 | 0.8323 | 0.1240 |
| NUDT2      | 0.6611 | 1.1707 | 0.7810 | 0.7165 | 0.8323 | 0.1154 |
| LOC727980  | 0.6577 | 1.1736 | 0.7939 | 0.7043 | 0.8324 | 0.1172 |
| MRPS22     | 0.6484 | 1.0950 | 0.8482 | 0.7383 | 0.8325 | 0.0966 |
| MAP3K4     | 0.7274 | 0.9884 | 0.8478 | 0.7664 | 0.8325 | 0.0577 |
| RPP40      | 0.6740 | 1.0952 | 0.8952 | 0.6657 | 0.8325 | 0.1024 |
| SENP6      | 0.8226 | 1.0061 | 0.8287 | 0.6731 | 0.8326 | 0.0681 |
| OVOL2      | 0.6997 | 1.2366 | 0.8000 | 0.5942 | 0.8326 | 0.1411 |
| DDX55      | 0.5621 | 1.4103 | 0.7498 | 0.6086 | 0.8327 | 0.1966 |
| KLHL8      | 0.6467 | 1.0729 | 0.8747 | 0.7366 | 0.8327 | 0.0928 |
| LOC730534  | 0.5934 | 1.1015 | 0.9760 | 0.6604 | 0.8328 | 0.1224 |
| UPF2       | 0.6570 | 1.1639 | 0.8050 | 0.7054 | 0.8328 | 0.1146 |
| TAF1B      | 0.7269 | 0.9935 | 0.8729 | 0.7381 | 0.8328 | 0.0630 |
| FAM3A      | 0.7979 | 1.0343 | 0.8707 | 0.6285 | 0.8329 | 0.0842 |
| TULP3      | 0.8032 | 1.1433 | 0.7445 | 0.6405 | 0.8329 | 0.1088 |
| CD302      | 0.7857 | 0.9211 | 0.8775 | 0.7473 | 0.8329 | 0.0401 |
| LRRC45     | 0.7798 | 0.9572 | 0.8249 | 0.7698 | 0.8329 | 0.0431 |
| KIAA1530   | 0.7570 | 0.9918 | 0.8105 | 0.7724 | 0.8329 | 0.0541 |
| SLAIN1     | 0.6295 | 1.0597 | 0.9931 | 0.6495 | 0.8329 | 0.1126 |
| LOC202227  | 0.7501 | 0.9883 | 0.7742 | 0.8193 | 0.8330 | 0.0537 |
| HOXC9      | 0.7427 | 1.0244 | 0.7698 | 0.7953 | 0.8330 | 0.0647 |
| LOC1001285 | 0.8123 | 0.9407 | 0.7960 | 0.7833 | 0.8331 | 0.0364 |
| C9orf69    | 0.7801 | 0.9946 | 0.8181 | 0.7394 | 0.8331 | 0.0562 |
| PGRMC1     | 0.7618 | 1.0722 | 0.8636 | 0.6350 | 0.8331 | 0.0924 |
| CNNM3      | 0.6585 | 1.0839 | 0.8877 | 0.7025 | 0.8331 | 0.0972 |
| CRSP9      | 0.7460 | 1.1661 | 0.7699 | 0.6509 | 0.8332 | 0.1139 |
| HMGCS2     | 0.6852 | 1.1682 | 0.8380 | 0.6415 | 0.8332 | 0.1193 |
| IREB2      | 0.5773 | 1.2890 | 0.7448 | 0.7221 | 0.8333 | 0.1564 |
| HEBP2      | 0.6175 | 0.9284 | 1.1583 | 0.6291 | 0.8334 | 0.1301 |
| BTF3L4     | 0.7493 | 1.1992 | 0.7582 | 0.6267 | 0.8334 | 0.1256 |
| TIAL1      | 0.7438 | 0.9904 | 0.9134 | 0.6858 | 0.8334 | 0.0712 |
| C21orf24   | 0.7563 | 0.9804 | 0.9768 | 0.6201 | 0.8334 | 0.0883 |
| LOC641768  | 0.6969 | 0.7218 | 1.3388 | 0.5762 | 0.8334 | 0.1714 |
| LOC202781  | 0.7703 | 1.0800 | 0.8444 | 0.6389 | 0.8334 | 0.0925 |
| PHRF1      | 0.6336 | 1.1355 | 0.8547 | 0.7099 | 0.8334 | 0.1106 |
| NFATC2IP   | 0.7042 | 1.0166 | 0.8780 | 0.7351 | 0.8334 | 0.0718 |
| LOC646197  | 0.6704 | 1.0885 | 0.9122 | 0.6628 | 0.8335 | 0.1029 |
| FAM165B    | 0.7125 | 1.0953 | 0.8308 | 0.6954 | 0.8335 | 0.0923 |
| CLN6       | 0.6945 | 0.9707 | 0.8496 | 0.8191 | 0.8335 | 0.0567 |
| C1orf156   | 0.7037 | 1.0191 | 0.8386 | 0.7726 | 0.8335 | 0.0677 |
| ISCA1      | 0.6728 | 1.0778 | 0.9421 | 0.6414 | 0.8335 | 0.1057 |

|           |        |        |        |        |        |        |
|-----------|--------|--------|--------|--------|--------|--------|
| MRPL44    | 0.6457 | 1.0809 | 0.9435 | 0.6641 | 0.8336 | 0.1069 |
| DDX23     | 0.7763 | 1.1868 | 0.7623 | 0.6088 | 0.8336 | 0.1237 |
| FAM111B   | 0.6878 | 0.9615 | 0.8603 | 0.8249 | 0.8336 | 0.0566 |
| DAD1      | 0.7214 | 1.0974 | 0.8505 | 0.6651 | 0.8336 | 0.0961 |
| ZNF775    | 0.7691 | 1.0241 | 0.7897 | 0.7515 | 0.8336 | 0.0640 |
| HMOX1     | 0.7556 | 1.0068 | 0.7689 | 0.8034 | 0.8337 | 0.0586 |
| AHCY      | 0.6805 | 1.0295 | 0.8988 | 0.7260 | 0.8337 | 0.0804 |
| ARL5A     | 0.5425 | 1.1142 | 0.9781 | 0.7002 | 0.8338 | 0.1298 |
| SF3B3     | 0.6222 | 1.0436 | 0.9470 | 0.7223 | 0.8338 | 0.0975 |
| RASL11B   | 0.7155 | 1.0049 | 0.9312 | 0.6839 | 0.8339 | 0.0792 |
| ARHGEF10  | 0.8526 | 0.9865 | 0.7595 | 0.7369 | 0.8339 | 0.0567 |
| CENPI     | 0.7009 | 0.9147 | 0.8864 | 0.8338 | 0.8340 | 0.0474 |
| CANX      | 0.6935 | 1.1354 | 0.8548 | 0.6523 | 0.8340 | 0.1096 |
| EIF2B3    | 0.7094 | 0.8995 | 1.1409 | 0.5863 | 0.8340 | 0.1209 |
| LOC649864 | 0.6696 | 0.9947 | 0.9007 | 0.7712 | 0.8341 | 0.0714 |
| RCHY1     | 0.7725 | 0.9460 | 0.8843 | 0.7339 | 0.8342 | 0.0491 |
| EPPB9     | 0.7134 | 0.9218 | 0.8805 | 0.8214 | 0.8342 | 0.0453 |
| LOC644404 | 0.7211 | 1.0019 | 0.7557 | 0.8588 | 0.8344 | 0.0630 |
| PRCP      | 0.7295 | 1.0461 | 0.8576 | 0.7046 | 0.8344 | 0.0781 |
| LOC440731 | 0.7940 | 0.8577 | 1.0455 | 0.6410 | 0.8345 | 0.0837 |
| PPP2CA    | 0.6633 | 1.1049 | 0.9330 | 0.6370 | 0.8346 | 0.1122 |
| MALL      | 0.8237 | 0.9483 | 0.8717 | 0.6945 | 0.8346 | 0.0533 |
| LOC728059 | 0.5892 | 1.0464 | 0.9310 | 0.7719 | 0.8346 | 0.0993 |
| CUGBP1    | 0.6186 | 1.1508 | 0.8924 | 0.6767 | 0.8346 | 0.1207 |
| NANP      | 0.6428 | 1.1469 | 0.8395 | 0.7095 | 0.8347 | 0.1118 |
| LOC442075 | 0.7061 | 1.0205 | 0.8064 | 0.8058 | 0.8347 | 0.0663 |
| TMEM14B   | 0.6963 | 0.9026 | 1.1665 | 0.5739 | 0.8348 | 0.1297 |
| POLR3K    | 0.6041 | 1.0553 | 0.9550 | 0.7249 | 0.8349 | 0.1034 |
| MED25     | 0.7870 | 1.0958 | 0.7940 | 0.6627 | 0.8349 | 0.0920 |
| LONP1     | 0.7924 | 1.0585 | 0.7469 | 0.7421 | 0.8350 | 0.0754 |
| GLB1L2    | 0.6959 | 1.1084 | 0.7523 | 0.7832 | 0.8350 | 0.0929 |
| HPRT1     | 0.6366 | 1.1046 | 0.9250 | 0.6739 | 0.8350 | 0.1103 |
| TCTN3     | 0.8265 | 0.9353 | 0.9419 | 0.6364 | 0.8350 | 0.0713 |
| ATP5O     | 0.7318 | 1.0169 | 0.8746 | 0.7173 | 0.8352 | 0.0702 |
| ENOSF1    | 0.7156 | 0.9927 | 1.0586 | 0.5739 | 0.8352 | 0.1145 |
| POLR2G    | 0.6796 | 1.1076 | 0.8658 | 0.6877 | 0.8352 | 0.1005 |
| HIST1H2BO | 0.7555 | 0.9289 | 0.8812 | 0.7752 | 0.8352 | 0.0417 |
| HSPA4     | 0.7694 | 0.9525 | 0.9626 | 0.6563 | 0.8352 | 0.0743 |
| MED10     | 0.6876 | 1.1003 | 0.8900 | 0.6630 | 0.8352 | 0.1019 |
| RNF19B    | 0.9105 | 0.8694 | 0.8182 | 0.7427 | 0.8352 | 0.0362 |
| ATE1      | 0.7017 | 1.0085 | 0.8574 | 0.7732 | 0.8352 | 0.0659 |
| VPS39     | 0.6686 | 0.9863 | 0.8996 | 0.7865 | 0.8353 | 0.0690 |
| GRINA     | 0.7231 | 1.0798 | 0.8353 | 0.7030 | 0.8353 | 0.0865 |
| PUF60     | 0.6226 | 1.0714 | 0.8849 | 0.7623 | 0.8353 | 0.0952 |
| LOC392635 | 0.7988 | 0.8737 | 0.8755 | 0.7933 | 0.8353 | 0.0227 |
| BCAT2     | 0.7159 | 1.1415 | 0.8409 | 0.6430 | 0.8353 | 0.1099 |

|            |        |        |        |        |        |        |
|------------|--------|--------|--------|--------|--------|--------|
| DPM3       | 0.6657 | 1.2045 | 0.8382 | 0.6332 | 0.8354 | 0.1310 |
| SNORD56    | 0.7198 | 0.9978 | 0.8255 | 0.7987 | 0.8354 | 0.0586 |
| HPS1       | 0.7860 | 1.0322 | 0.8085 | 0.7155 | 0.8356 | 0.0685 |
| LOC151579  | 0.6229 | 1.2145 | 1.0103 | 0.4946 | 0.8356 | 0.1672 |
| TTC39C     | 0.6227 | 1.0453 | 0.9328 | 0.7421 | 0.8357 | 0.0946 |
| FASTKD1    | 0.6039 | 1.1799 | 0.8751 | 0.6841 | 0.8357 | 0.1281 |
| C2orf76    | 0.7788 | 0.7732 | 1.0607 | 0.7305 | 0.8358 | 0.0758 |
| C21orf66   | 0.7403 | 0.9963 | 0.8371 | 0.7694 | 0.8358 | 0.0572 |
| MTO1       | 0.6977 | 1.0747 | 0.8524 | 0.7185 | 0.8358 | 0.0867 |
| LOC1001335 | 0.6606 | 1.0500 | 0.8315 | 0.8015 | 0.8359 | 0.0805 |
| YOD1       | 0.8272 | 1.0942 | 0.7471 | 0.6752 | 0.8359 | 0.0915 |
| LOC399900  | 0.6816 | 1.1343 | 0.8518 | 0.6760 | 0.8359 | 0.1075 |
| C2orf69    | 0.6203 | 1.1510 | 0.8518 | 0.7208 | 0.8360 | 0.1152 |
| KIAA0664   | 0.7012 | 1.1223 | 0.8468 | 0.6739 | 0.8361 | 0.1027 |
| NPEPPS     | 0.8680 | 0.9497 | 0.8223 | 0.7044 | 0.8361 | 0.0512 |
| LOC554206  | 0.7378 | 1.1002 | 0.8440 | 0.6624 | 0.8361 | 0.0956 |
| TMEM135    | 0.7990 | 0.9313 | 0.9501 | 0.6643 | 0.8362 | 0.0664 |
| SCLT1      | 0.8041 | 0.9771 | 0.8435 | 0.7203 | 0.8363 | 0.0535 |
| C7orf50    | 0.5836 | 1.0798 | 0.9338 | 0.7479 | 0.8363 | 0.1082 |
| HSD17B11   | 0.6948 | 1.0350 | 0.9345 | 0.6810 | 0.8363 | 0.0881 |
| RBBP4      | 0.7925 | 1.0299 | 0.7853 | 0.7377 | 0.8363 | 0.0656 |
| MAP4K2     | 0.6109 | 1.2267 | 0.7936 | 0.7143 | 0.8363 | 0.1354 |
| PLDN       | 0.6601 | 1.2429 | 0.7623 | 0.6803 | 0.8364 | 0.1373 |
| SSX2IP     | 0.7940 | 1.0234 | 0.7751 | 0.7532 | 0.8364 | 0.0629 |
| THOC6      | 0.6665 | 1.0509 | 0.8569 | 0.7716 | 0.8365 | 0.0814 |
| STK38      | 0.7574 | 1.0793 | 0.7799 | 0.7293 | 0.8365 | 0.0816 |
| SNORD4A    | 0.7363 | 1.0458 | 0.8226 | 0.7413 | 0.8365 | 0.0725 |
| LRP5       | 0.6966 | 1.0756 | 0.8216 | 0.7523 | 0.8365 | 0.0837 |
| LOC729646  | 0.6744 | 1.1656 | 0.9392 | 0.5672 | 0.8366 | 0.1347 |
| LOC151162  | 0.6358 | 1.0491 | 0.9803 | 0.6815 | 0.8367 | 0.1042 |
| HNRPH3     | 0.7302 | 0.9586 | 1.0283 | 0.6296 | 0.8367 | 0.0939 |
| SLC43A1    | 0.6285 | 1.1638 | 0.7159 | 0.8386 | 0.8367 | 0.1172 |
| CDKN1C     | 0.7967 | 0.8645 | 0.9033 | 0.7824 | 0.8367 | 0.0285 |
| TTC31      | 0.7960 | 0.9726 | 0.8232 | 0.7552 | 0.8367 | 0.0474 |
| SRRD       | 0.6913 | 0.9917 | 0.9835 | 0.6805 | 0.8368 | 0.0871 |
| PPP1CC     | 0.7191 | 1.0442 | 0.9384 | 0.6454 | 0.8368 | 0.0930 |
| FAM3C      | 0.7170 | 1.0865 | 0.8242 | 0.7196 | 0.8368 | 0.0869 |
| PIAS3      | 0.8314 | 0.9611 | 0.8716 | 0.6834 | 0.8369 | 0.0579 |
| SNRNP70    | 0.7562 | 1.0572 | 0.8354 | 0.6993 | 0.8370 | 0.0785 |
| GAGE12F    | 0.7210 | 1.0555 | 0.8613 | 0.7104 | 0.8371 | 0.0805 |
| TK2        | 0.8044 | 1.1136 | 0.7818 | 0.6485 | 0.8371 | 0.0984 |
| ACPL2      | 0.8544 | 1.0485 | 0.7229 | 0.7225 | 0.8371 | 0.0770 |
| CIDEB      | 0.7343 | 0.9943 | 0.8255 | 0.7942 | 0.8371 | 0.0557 |
| TM2D3      | 0.7121 | 1.1774 | 0.8360 | 0.6229 | 0.8371 | 0.1216 |
| BAT4       | 0.7620 | 1.0228 | 0.8082 | 0.7553 | 0.8371 | 0.0630 |
| CCDC56     | 0.6999 | 1.0550 | 0.9212 | 0.6724 | 0.8371 | 0.0915 |

|            |        |        |        |        |        |        |
|------------|--------|--------|--------|--------|--------|--------|
| POP4       | 0.6951 | 0.9628 | 1.0925 | 0.5984 | 0.8372 | 0.1148 |
| DEDD       | 0.8231 | 1.0288 | 0.7696 | 0.7273 | 0.8372 | 0.0668 |
| ZNF573     | 0.6265 | 1.1023 | 0.8647 | 0.7554 | 0.8372 | 0.1009 |
| FTO        | 0.7638 | 1.1192 | 0.8163 | 0.6498 | 0.8373 | 0.1002 |
| WAC        | 0.7079 | 1.0250 | 0.9736 | 0.6426 | 0.8373 | 0.0951 |
| SNORD25    | 0.7176 | 0.9162 | 0.8944 | 0.8210 | 0.8373 | 0.0448 |
| GIT1       | 0.8288 | 0.9189 | 0.8183 | 0.7833 | 0.8373 | 0.0289 |
| HES1       | 0.6944 | 1.0406 | 0.9464 | 0.6682 | 0.8374 | 0.0923 |
| HECTD2     | 0.7428 | 1.0217 | 0.8607 | 0.7245 | 0.8374 | 0.0684 |
| KIAA2013   | 0.7312 | 1.2065 | 0.8110 | 0.6011 | 0.8374 | 0.1304 |
| C17orf90   | 0.7079 | 1.1131 | 0.8371 | 0.6918 | 0.8375 | 0.0975 |
| KIAA0895L  | 0.7122 | 1.0030 | 0.8831 | 0.7516 | 0.8375 | 0.0662 |
| TAPT1      | 0.7880 | 1.0728 | 0.8827 | 0.6065 | 0.8375 | 0.0971 |
| USP5       | 0.7101 | 1.1579 | 0.7887 | 0.6932 | 0.8375 | 0.1088 |
| FBXO33     | 0.7452 | 1.0243 | 0.9020 | 0.6785 | 0.8375 | 0.0779 |
| FOXK1      | 0.6872 | 1.0854 | 0.8041 | 0.7733 | 0.8375 | 0.0863 |
| C6orf85    | 0.7691 | 1.0774 | 0.8117 | 0.6918 | 0.8375 | 0.0837 |
| RNY3       | 0.6594 | 0.9510 | 0.9750 | 0.7652 | 0.8377 | 0.0757 |
| LOC642255  | 0.7719 | 0.8988 | 0.8374 | 0.8426 | 0.8377 | 0.0259 |
| ZNF69      | 0.6518 | 1.0559 | 0.9018 | 0.7413 | 0.8377 | 0.0892 |
| LOC139046  | 0.7453 | 1.0505 | 0.8514 | 0.7036 | 0.8377 | 0.0775 |
| LOC729342  | 0.7458 | 0.9201 | 0.9733 | 0.7117 | 0.8377 | 0.0642 |
| APOO       | 0.6066 | 1.3866 | 0.7931 | 0.5648 | 0.8378 | 0.1895 |
| PBRM1      | 0.6710 | 1.1217 | 0.7978 | 0.7609 | 0.8378 | 0.0983 |
| LOC1001296 | 0.3824 | 1.0026 | 1.2322 | 0.7341 | 0.8378 | 0.1828 |
| MRPL16     | 0.7269 | 1.0980 | 0.8833 | 0.6433 | 0.8379 | 0.1000 |
| CAMSAP1L1  | 0.6755 | 1.0963 | 0.9710 | 0.6094 | 0.8380 | 0.1166 |
| ADAM23     | 0.7446 | 1.0216 | 0.7954 | 0.7909 | 0.8381 | 0.0622 |
| SORL1      | 0.7394 | 0.9762 | 0.7921 | 0.8449 | 0.8382 | 0.0508 |
| KTI12      | 0.7488 | 1.0793 | 0.8209 | 0.7038 | 0.8382 | 0.0839 |
| ATP5SL     | 0.7608 | 1.0397 | 0.8786 | 0.6739 | 0.8383 | 0.0792 |
| FOXD1      | 0.7903 | 1.1049 | 0.7512 | 0.7067 | 0.8383 | 0.0905 |
| ECHDC3     | 0.7693 | 1.1240 | 0.8065 | 0.6537 | 0.8384 | 0.1006 |
| TMTC3      | 0.7165 | 1.0253 | 0.8895 | 0.7224 | 0.8384 | 0.0741 |
| FAM116B    | 0.7480 | 1.0549 | 0.8241 | 0.7266 | 0.8384 | 0.0751 |
| LOC1001330 | 0.7586 | 1.0069 | 0.8358 | 0.7524 | 0.8384 | 0.0593 |
| EFTUD2     | 0.6775 | 1.1605 | 0.9067 | 0.6091 | 0.8385 | 0.1248 |
| FAM173A    | 0.7718 | 1.2661 | 0.7499 | 0.5662 | 0.8385 | 0.1498 |
| FAM131A    | 0.7162 | 1.3037 | 0.7536 | 0.5806 | 0.8385 | 0.1595 |
| NOC3L      | 0.6938 | 0.8785 | 1.0389 | 0.7430 | 0.8385 | 0.0774 |
| ESRRA      | 0.6778 | 1.2240 | 0.7786 | 0.6738 | 0.8386 | 0.1308 |
| COIL       | 0.7020 | 1.1679 | 0.7687 | 0.7162 | 0.8387 | 0.1107 |
| SMARCD3    | 0.7444 | 0.9932 | 0.8761 | 0.7411 | 0.8387 | 0.0603 |
| MKI67      | 0.6941 | 1.0029 | 0.8662 | 0.7918 | 0.8387 | 0.0651 |
| C11orf17   | 0.6788 | 1.1216 | 0.8888 | 0.6657 | 0.8388 | 0.1073 |
| ZNF124     | 0.6746 | 0.9740 | 0.8973 | 0.8100 | 0.8390 | 0.0642 |

|            |        |        |        |        |        |        |
|------------|--------|--------|--------|--------|--------|--------|
| CNPY3      | 0.7258 | 1.0279 | 0.8864 | 0.7158 | 0.8390 | 0.0741 |
| HMGXB4     | 0.7833 | 1.0386 | 0.8276 | 0.7066 | 0.8390 | 0.0711 |
| DCBLD1     | 0.7109 | 0.9934 | 0.9279 | 0.7241 | 0.8391 | 0.0715 |
| LOC401076  | 0.6917 | 0.9720 | 0.9783 | 0.7143 | 0.8391 | 0.0787 |
| ZMPSTE24   | 0.7423 | 1.2289 | 0.7427 | 0.6425 | 0.8391 | 0.1321 |
| MGMT       | 0.7024 | 1.1375 | 0.9003 | 0.6162 | 0.8391 | 0.1159 |
| CTNS       | 0.6674 | 1.1662 | 0.8416 | 0.6815 | 0.8392 | 0.1159 |
| CHCHD5     | 0.8452 | 1.0740 | 0.8251 | 0.6128 | 0.8393 | 0.0943 |
| UBE2V1     | 0.6506 | 1.0042 | 0.8676 | 0.8348 | 0.8393 | 0.0728 |
| LZTFL1     | 0.8057 | 0.9899 | 0.8647 | 0.6971 | 0.8394 | 0.0610 |
| SNORA79    | 0.4582 | 1.0056 | 1.0852 | 0.8085 | 0.8394 | 0.1397 |
| CORO1A     | 0.8221 | 0.8982 | 0.8635 | 0.7740 | 0.8394 | 0.0268 |
| ATAD3B     | 0.7399 | 0.9431 | 0.8997 | 0.7751 | 0.8394 | 0.0487 |
| CNN2       | 0.7190 | 1.1143 | 0.7953 | 0.7294 | 0.8395 | 0.0931 |
| LOC644295  | 0.7024 | 0.9715 | 0.8887 | 0.7956 | 0.8396 | 0.0581 |
| LOC1001301 | 0.7381 | 0.9466 | 0.9318 | 0.7417 | 0.8396 | 0.0576 |
| FLJ25363   | 0.7803 | 0.9005 | 0.8676 | 0.8098 | 0.8396 | 0.0272 |
| ENHO       | 0.8373 | 0.9431 | 0.8722 | 0.7057 | 0.8396 | 0.0498 |
| TOP1MT     | 0.6632 | 1.1853 | 0.7651 | 0.7448 | 0.8396 | 0.1173 |
| LOC728505  | 0.5658 | 1.2093 | 0.8538 | 0.7296 | 0.8396 | 0.1366 |
| FAM72A     | 0.7821 | 0.9128 | 0.9170 | 0.7467 | 0.8396 | 0.0440 |
| POLR3A     | 0.7510 | 1.1919 | 0.7824 | 0.6334 | 0.8397 | 0.1217 |
| CPSF3      | 0.7018 | 1.1569 | 0.8979 | 0.6022 | 0.8397 | 0.1223 |
| SFRS2IP    | 0.7512 | 1.0204 | 0.9363 | 0.6511 | 0.8397 | 0.0844 |
| COX7A2L    | 0.7866 | 1.1076 | 0.8795 | 0.5854 | 0.8398 | 0.1083 |
| SRPRB      | 0.5673 | 1.2786 | 0.9224 | 0.5909 | 0.8398 | 0.1672 |
| NUF2       | 0.7716 | 0.9058 | 0.9179 | 0.7645 | 0.8399 | 0.0416 |
| ITPA       | 0.7010 | 1.1398 | 0.8799 | 0.6391 | 0.8400 | 0.1122 |
| LOC148915  | 0.6663 | 1.1625 | 1.0113 | 0.5199 | 0.8400 | 0.1489 |
| NSA2       | 0.6918 | 1.1180 | 0.8758 | 0.6742 | 0.8400 | 0.1033 |
| XRCC6      | 0.7421 | 1.1396 | 0.8647 | 0.6136 | 0.8400 | 0.1123 |
| GOLSYN     | 0.7062 | 0.9930 | 0.8777 | 0.7831 | 0.8400 | 0.0619 |
| ASPHD1     | 0.6670 | 1.0800 | 0.9093 | 0.7038 | 0.8400 | 0.0961 |
| RBM47      | 0.7367 | 1.0813 | 0.8788 | 0.6640 | 0.8402 | 0.0919 |
| FBXO7      | 0.7878 | 1.1358 | 0.7830 | 0.6542 | 0.8402 | 0.1033 |
| EIF1AX     | 0.7606 | 0.8984 | 0.9751 | 0.7272 | 0.8403 | 0.0582 |
| PRDX2      | 0.6665 | 1.1897 | 0.8567 | 0.6485 | 0.8404 | 0.1256 |
| COMMD3     | 0.6914 | 1.1177 | 0.8635 | 0.6888 | 0.8404 | 0.1011 |
| RNF5       | 0.7530 | 1.1350 | 0.7856 | 0.6878 | 0.8404 | 0.1003 |
| LOC644310  | 0.6383 | 0.9910 | 1.0276 | 0.7049 | 0.8404 | 0.0987 |
| IRX3       | 0.6291 | 1.1872 | 0.8532 | 0.6925 | 0.8405 | 0.1248 |
| C2orf28    | 0.6723 | 1.1182 | 0.9122 | 0.6595 | 0.8406 | 0.1093 |
| LOC645781  | 0.7549 | 1.0192 | 0.8747 | 0.7134 | 0.8406 | 0.0687 |
| LOC341965  | 0.7393 | 0.9412 | 0.8931 | 0.7888 | 0.8406 | 0.0464 |
| PHF10      | 0.7490 | 0.8873 | 0.9242 | 0.8020 | 0.8406 | 0.0399 |
| THAP4      | 0.7120 | 0.9865 | 0.8355 | 0.8285 | 0.8406 | 0.0563 |



|            |        |        |        |        |        |        |
|------------|--------|--------|--------|--------|--------|--------|
| WDYHV1     | 0.7987 | 1.1443 | 0.8441 | 0.5756 | 0.8406 | 0.1170 |
| VPS29      | 0.7833 | 1.0024 | 0.9432 | 0.6338 | 0.8407 | 0.0830 |
| ADRBK1     | 0.7426 | 1.1471 | 0.8026 | 0.6706 | 0.8407 | 0.1056 |
| TECR       | 0.6178 | 1.1295 | 0.9728 | 0.6427 | 0.8407 | 0.1257 |
| LOC283932  | 0.8332 | 1.0144 | 0.7791 | 0.7364 | 0.8407 | 0.0612 |
| GNPAT      | 0.7562 | 1.1493 | 0.8195 | 0.6388 | 0.8409 | 0.1094 |
| LOC730432  | 0.7087 | 1.0178 | 0.9258 | 0.7116 | 0.8410 | 0.0778 |
| SLC45A3    | 0.8539 | 1.0211 | 0.8185 | 0.6707 | 0.8410 | 0.0719 |
| LOC1001301 | 0.6736 | 1.1232 | 0.9068 | 0.6606 | 0.8411 | 0.1098 |
| ZNF195     | 0.5788 | 1.0689 | 1.0460 | 0.6705 | 0.8411 | 0.1264 |
| DDOST      | 0.7173 | 1.0124 | 0.9517 | 0.6829 | 0.8411 | 0.0826 |
| WDR42A     | 0.7118 | 1.3015 | 0.7720 | 0.5791 | 0.8411 | 0.1587 |
| SDCBP      | 0.7782 | 0.9825 | 0.8780 | 0.7257 | 0.8411 | 0.0568 |
| POLR3E     | 0.6695 | 1.1810 | 0.8293 | 0.6847 | 0.8411 | 0.1189 |
| C2orf77    | 0.7722 | 0.9115 | 0.8929 | 0.7880 | 0.8412 | 0.0356 |
| MIOS       | 0.7120 | 1.1536 | 0.8210 | 0.6783 | 0.8412 | 0.1085 |
| SURF1      | 0.6235 | 1.1514 | 0.9765 | 0.6134 | 0.8412 | 0.1335 |
| HPS6       | 0.6979 | 1.0645 | 0.9252 | 0.6774 | 0.8413 | 0.0932 |
| TRMT5      | 0.6801 | 1.1548 | 0.9300 | 0.6003 | 0.8413 | 0.1259 |
| SNORA24    | 0.6472 | 1.1399 | 0.8194 | 0.7587 | 0.8413 | 0.1057 |
| ZNF622     | 0.6869 | 1.0622 | 0.9315 | 0.6848 | 0.8413 | 0.0936 |
| PCGF5      | 0.7710 | 0.9466 | 0.8735 | 0.7743 | 0.8413 | 0.0424 |
| SMC3       | 0.6975 | 1.1678 | 0.7085 | 0.7916 | 0.8413 | 0.1108 |
| CDK5RAP2   | 0.7893 | 1.0622 | 0.7990 | 0.7156 | 0.8415 | 0.0759 |
| XYLT2      | 0.7828 | 1.0404 | 0.9076 | 0.6362 | 0.8417 | 0.0864 |
| GPC2       | 0.9083 | 0.9616 | 0.6158 | 0.8814 | 0.8418 | 0.0772 |
| C9orf91    | 0.7864 | 1.1216 | 0.7369 | 0.7222 | 0.8418 | 0.0943 |
| KLHL36     | 0.6911 | 1.1784 | 0.8032 | 0.6944 | 0.8418 | 0.1152 |
| KIAA1958   | 0.7110 | 1.0387 | 0.8798 | 0.7376 | 0.8418 | 0.0754 |
| LOC85389   | 0.6763 | 1.0054 | 0.9264 | 0.7594 | 0.8419 | 0.0753 |
| PAPOLA     | 0.7466 | 1.0100 | 0.9830 | 0.6280 | 0.8419 | 0.0926 |
| OTUD6B     | 0.6565 | 1.2158 | 0.7615 | 0.7339 | 0.8419 | 0.1266 |
| GPRIN2     | 0.7874 | 0.9771 | 0.8692 | 0.7341 | 0.8420 | 0.0529 |
| RAP1GDS1   | 0.6712 | 1.2040 | 0.8478 | 0.6450 | 0.8420 | 0.1288 |
| HPS3       | 0.7131 | 1.1694 | 0.8730 | 0.6127 | 0.8420 | 0.1216 |
| LOC646993  | 0.7688 | 1.0242 | 0.8327 | 0.7426 | 0.8421 | 0.0636 |
| HOXC8      | 0.8808 | 0.9019 | 0.7585 | 0.8272 | 0.8421 | 0.0320 |
| TAZ        | 0.7686 | 0.9319 | 0.8604 | 0.8076 | 0.8421 | 0.0353 |
| TNFRSF19   | 0.8308 | 1.0981 | 0.7452 | 0.6946 | 0.8422 | 0.0898 |
| C12orf45   | 0.7332 | 0.9331 | 0.9854 | 0.7171 | 0.8422 | 0.0685 |
| DCTN5      | 0.6947 | 1.1680 | 0.7280 | 0.7783 | 0.8422 | 0.1099 |
| PLEKHA1    | 0.7170 | 1.0916 | 0.8951 | 0.6652 | 0.8422 | 0.0966 |
| FAAH       | 0.7403 | 1.2256 | 0.7563 | 0.6468 | 0.8423 | 0.1301 |
| C6orf108   | 0.7284 | 1.1011 | 0.8217 | 0.7179 | 0.8423 | 0.0894 |
| PPP2R5D    | 0.8223 | 0.9898 | 0.8294 | 0.7276 | 0.8423 | 0.0544 |
| U1SNRNPBP  | 0.6468 | 1.2570 | 0.7396 | 0.7259 | 0.8423 | 0.1397 |

|            |        |        |        |        |        |        |
|------------|--------|--------|--------|--------|--------|--------|
| SFRS2B     | 0.8094 | 1.0616 | 0.7888 | 0.7095 | 0.8423 | 0.0762 |
| S100A13    | 0.7161 | 1.0505 | 0.8713 | 0.7316 | 0.8424 | 0.0777 |
| PSPC1      | 0.6947 | 1.0433 | 0.9205 | 0.7110 | 0.8424 | 0.0844 |
| PGP        | 0.7701 | 1.0247 | 0.8222 | 0.7525 | 0.8424 | 0.0626 |
| MKKS       | 0.7644 | 1.0502 | 0.8959 | 0.6592 | 0.8424 | 0.0845 |
| FLJ39653   | 0.8062 | 0.8970 | 0.8810 | 0.7855 | 0.8424 | 0.0274 |
| LOC1001297 | 0.7522 | 0.9993 | 1.0249 | 0.5935 | 0.8425 | 0.1033 |
| HNRNPA3    | 0.5417 | 1.3538 | 0.7783 | 0.6962 | 0.8425 | 0.1774 |
| HP1BP3     | 0.6595 | 1.0654 | 0.8758 | 0.7693 | 0.8425 | 0.0864 |
| ITGB5      | 0.7584 | 1.0412 | 0.8695 | 0.7009 | 0.8425 | 0.0749 |
| C12orf11   | 0.6896 | 1.0740 | 0.9075 | 0.6988 | 0.8425 | 0.0921 |
| MAPKAPK3   | 0.8079 | 1.1816 | 0.7769 | 0.6036 | 0.8425 | 0.1216 |
| PQBP1      | 0.5998 | 1.1862 | 0.8371 | 0.7469 | 0.8425 | 0.1246 |
| FZD3       | 0.7198 | 1.0758 | 0.6984 | 0.8761 | 0.8425 | 0.0873 |
| SNORA73A   | 0.6548 | 0.9936 | 0.8956 | 0.8261 | 0.8425 | 0.0714 |
| EIF1B      | 0.7989 | 0.9288 | 1.0434 | 0.5993 | 0.8426 | 0.0952 |
| SLK        | 0.7368 | 1.0354 | 0.9054 | 0.6928 | 0.8426 | 0.0789 |
| ZNF529     | 0.7104 | 1.1165 | 0.9565 | 0.5870 | 0.8426 | 0.1193 |
| BAT2D1     | 0.7415 | 1.2624 | 0.7645 | 0.6023 | 0.8427 | 0.1444 |
| ZNF525     | 0.6732 | 0.9101 | 1.0066 | 0.7809 | 0.8427 | 0.0730 |
| LXN        | 0.7817 | 0.9365 | 0.8688 | 0.7840 | 0.8428 | 0.0372 |
| BTG3       | 0.6492 | 1.0420 | 0.9353 | 0.7447 | 0.8428 | 0.0891 |
| SRP54      | 0.7769 | 1.1621 | 0.7808 | 0.6521 | 0.8430 | 0.1105 |
| EIF2AK1    | 0.7774 | 1.0627 | 0.8380 | 0.6944 | 0.8431 | 0.0789 |
| SH3BGRL3   | 0.8356 | 0.9524 | 0.9009 | 0.6837 | 0.8432 | 0.0583 |
| FXR1       | 0.7108 | 1.0704 | 0.8839 | 0.7075 | 0.8432 | 0.0862 |
| PMF1       | 0.5925 | 1.2214 | 0.9097 | 0.6492 | 0.8432 | 0.1438 |
| SNRNP40    | 0.5959 | 1.2159 | 0.8292 | 0.7319 | 0.8433 | 0.1331 |
| MTRR       | 0.7350 | 1.0023 | 0.8828 | 0.7535 | 0.8434 | 0.0623 |
| RNF126     | 0.7815 | 1.0524 | 0.8708 | 0.6690 | 0.8434 | 0.0810 |
| PYGO2      | 0.8406 | 1.0574 | 0.8251 | 0.6506 | 0.8434 | 0.0833 |
| LOC654189  | 0.6441 | 1.1867 | 0.8941 | 0.6489 | 0.8435 | 0.1285 |
| WTAP       | 0.7161 | 0.9853 | 0.9550 | 0.7178 | 0.8435 | 0.0733 |
| RPAIN      | 0.7442 | 1.1244 | 0.7720 | 0.7336 | 0.8436 | 0.0940 |
| SCML1      | 0.6447 | 1.0314 | 0.9620 | 0.7362 | 0.8436 | 0.0915 |
| LOC652545  | 0.7119 | 1.0632 | 0.8584 | 0.7413 | 0.8437 | 0.0797 |
| GSTO1      | 0.7930 | 0.9637 | 0.9400 | 0.6784 | 0.8438 | 0.0668 |
| MED31      | 0.6732 | 1.0844 | 0.8907 | 0.7276 | 0.8440 | 0.0925 |
| LOC642489  | 0.6325 | 1.3078 | 0.7868 | 0.6488 | 0.8440 | 0.1584 |
| MRPL32     | 0.6527 | 1.0485 | 1.0161 | 0.6586 | 0.8440 | 0.1090 |
| LOC1001297 | 0.8467 | 0.9572 | 0.7755 | 0.7969 | 0.8441 | 0.0405 |
| GCAT       | 0.6427 | 1.0936 | 0.9733 | 0.6669 | 0.8441 | 0.1122 |
| C9orf89    | 0.6920 | 1.1640 | 0.8592 | 0.6614 | 0.8441 | 0.1151 |
| DOM3Z      | 0.7259 | 1.1431 | 0.7870 | 0.7206 | 0.8441 | 0.1008 |
| JMJD8      | 0.6205 | 1.2274 | 0.8765 | 0.6523 | 0.8442 | 0.1399 |
| ME1        | 0.7900 | 0.7600 | 1.2460 | 0.5809 | 0.8442 | 0.1416 |

|             |        |        |        |        |        |        |
|-------------|--------|--------|--------|--------|--------|--------|
| NSDHL       | 0.6941 | 1.1231 | 0.8772 | 0.6825 | 0.8442 | 0.1031 |
| CARS2       | 0.8177 | 1.0506 | 0.8530 | 0.6557 | 0.8442 | 0.0811 |
| THOC7       | 0.6890 | 1.0179 | 1.0012 | 0.6689 | 0.8442 | 0.0956 |
| LOC653453   | 0.7115 | 0.9697 | 0.8999 | 0.7960 | 0.8443 | 0.0568 |
| ZNF383      | 0.8625 | 0.8668 | 0.9168 | 0.7309 | 0.8443 | 0.0397 |
| NEDD1       | 0.7123 | 1.0555 | 0.8815 | 0.7278 | 0.8443 | 0.0801 |
| METT11D1    | 0.6919 | 1.1672 | 0.8114 | 0.7066 | 0.8443 | 0.1109 |
| PRICKLE4    | 0.6010 | 1.3291 | 0.8832 | 0.5639 | 0.8443 | 0.1766 |
| C4orf32     | 0.7943 | 1.0198 | 0.8613 | 0.7019 | 0.8443 | 0.0670 |
| CNOT1       | 0.7032 | 1.1071 | 0.9090 | 0.6583 | 0.8444 | 0.1032 |
| MRPL39      | 0.6318 | 1.1229 | 0.9112 | 0.7118 | 0.8444 | 0.1098 |
| TRIM41      | 0.7548 | 1.1475 | 0.8740 | 0.6016 | 0.8445 | 0.1154 |
| D2HGDH      | 0.7335 | 1.1841 | 0.8130 | 0.6473 | 0.8445 | 0.1182 |
| LMLN        | 0.7569 | 0.8913 | 0.7869 | 0.9429 | 0.8445 | 0.0436 |
| RP5-1022P6. | 0.8365 | 0.8076 | 0.9061 | 0.8278 | 0.8445 | 0.0214 |
| LOC650254   | 0.8103 | 0.8769 | 0.8395 | 0.8516 | 0.8446 | 0.0138 |
| RNF138      | 0.5882 | 1.2343 | 0.9421 | 0.6139 | 0.8446 | 0.1528 |
| CORO2A      | 0.7225 | 1.1098 | 0.7664 | 0.7799 | 0.8446 | 0.0892 |
| HSPA4L      | 0.5707 | 1.0010 | 1.1136 | 0.6934 | 0.8447 | 0.1274 |
| SNORA57     | 0.7678 | 1.0454 | 0.8698 | 0.6959 | 0.8447 | 0.0758 |
| TSFM        | 0.7406 | 1.1240 | 0.8182 | 0.6964 | 0.8448 | 0.0964 |
| SNHG7       | 0.8251 | 1.0263 | 0.7943 | 0.7335 | 0.8448 | 0.0634 |
| PCBD1       | 0.6621 | 1.1867 | 0.8800 | 0.6505 | 0.8448 | 0.1256 |
| PCYT2       | 0.7662 | 1.0049 | 0.9066 | 0.7016 | 0.8448 | 0.0684 |
| SAR1A       | 0.7090 | 0.9458 | 1.0298 | 0.6949 | 0.8449 | 0.0843 |
| WDR5        | 0.7303 | 1.0221 | 0.8401 | 0.7870 | 0.8449 | 0.0632 |
| RAB28       | 0.7960 | 1.0693 | 0.7623 | 0.7521 | 0.8449 | 0.0754 |
| EIF3D       | 0.7089 | 1.1403 | 0.9017 | 0.6289 | 0.8449 | 0.1139 |
| QPCTL       | 0.7024 | 0.9871 | 0.7705 | 0.9199 | 0.8450 | 0.0656 |
| DKFZp667M2  | 0.7745 | 0.8906 | 0.9635 | 0.7515 | 0.8450 | 0.0499 |
| ZNF800      | 0.6445 | 1.1030 | 0.9332 | 0.6995 | 0.8450 | 0.1063 |
| SNTA1       | 0.7096 | 0.9925 | 0.8789 | 0.7992 | 0.8451 | 0.0601 |
| FGL1        | 0.7737 | 0.9780 | 0.8887 | 0.7401 | 0.8451 | 0.0545 |
| CCDC74B     | 0.8673 | 1.1487 | 0.6801 | 0.6843 | 0.8451 | 0.1102 |
| ORC3L       | 0.7986 | 0.9751 | 0.9391 | 0.6678 | 0.8452 | 0.0703 |
| C7orf20     | 0.7027 | 1.0558 | 0.9045 | 0.7181 | 0.8453 | 0.0838 |
| TRNT1       | 0.6738 | 0.9563 | 1.0588 | 0.6923 | 0.8453 | 0.0961 |
| RCAN1       | 0.7334 | 1.0926 | 0.7803 | 0.7750 | 0.8453 | 0.0831 |
| ZRANB2      | 0.7184 | 1.0271 | 1.0099 | 0.6260 | 0.8454 | 0.1018 |
| NUDT15      | 0.7159 | 0.9955 | 0.9306 | 0.7397 | 0.8454 | 0.0694 |
| PGAM4       | 0.7741 | 1.0859 | 0.8758 | 0.6463 | 0.8455 | 0.0929 |
| MXI1        | 0.7768 | 1.0238 | 0.8048 | 0.7768 | 0.8455 | 0.0598 |
| ANKRD39     | 0.8493 | 0.9852 | 0.7890 | 0.7588 | 0.8456 | 0.0502 |
| HPCAL4      | 0.6817 | 0.9371 | 0.9224 | 0.8413 | 0.8456 | 0.0586 |
| ZDHHC23     | 0.7708 | 1.0288 | 0.8839 | 0.6994 | 0.8457 | 0.0719 |
| PIH1D1      | 0.9183 | 1.0618 | 0.7090 | 0.6937 | 0.8457 | 0.0884 |

|           |        |        |        |        |        |        |
|-----------|--------|--------|--------|--------|--------|--------|
| TSPO      | 0.7088 | 1.1744 | 0.8420 | 0.6578 | 0.8458 | 0.1162 |
| LOC650251 | 0.8246 | 0.8752 | 0.9843 | 0.6988 | 0.8458 | 0.0592 |
| ACSM3     | 0.7456 | 1.0900 | 0.8658 | 0.6817 | 0.8458 | 0.0899 |
| TMEM19    | 0.8359 | 0.9891 | 0.9516 | 0.6064 | 0.8458 | 0.0862 |
| CDK5RAP3  | 0.6705 | 1.1766 | 0.8483 | 0.6878 | 0.8458 | 0.1173 |
| WASF2     | 0.6846 | 1.0706 | 0.8514 | 0.7768 | 0.8459 | 0.0823 |
| BNIP1     | 0.6585 | 1.1277 | 0.8572 | 0.7405 | 0.8459 | 0.1024 |
| LRRFIP1   | 0.7270 | 1.1177 | 0.8161 | 0.7230 | 0.8460 | 0.0931 |
| C15orf63  | 0.7357 | 0.9896 | 0.8555 | 0.8031 | 0.8460 | 0.0538 |
| TOB1      | 0.7465 | 1.0470 | 0.8531 | 0.7376 | 0.8460 | 0.0719 |
| TLK1      | 0.6983 | 0.9347 | 1.0563 | 0.6951 | 0.8461 | 0.0898 |
| PRPSAP2   | 0.7141 | 1.0497 | 0.9670 | 0.6539 | 0.8462 | 0.0959 |
| TTC14     | 0.7775 | 1.0084 | 0.9377 | 0.6613 | 0.8462 | 0.0783 |
| ARSK      | 0.7193 | 1.0865 | 0.8846 | 0.6945 | 0.8462 | 0.0905 |
| LTBR      | 0.8151 | 1.1086 | 0.8597 | 0.6015 | 0.8462 | 0.1040 |
| EIF3K     | 0.6724 | 1.1241 | 0.9315 | 0.6570 | 0.8462 | 0.1120 |
| TRRAP     | 0.6909 | 1.1599 | 0.7426 | 0.7918 | 0.8463 | 0.1065 |
| PAFAH1B3  | 0.6924 | 1.1823 | 0.8327 | 0.6780 | 0.8464 | 0.1173 |
| CCDC55    | 0.7462 | 1.0129 | 0.8910 | 0.7353 | 0.8464 | 0.0659 |
| LOC389168 | 0.7003 | 1.1500 | 0.8608 | 0.6748 | 0.8464 | 0.1092 |
| GALNTL4   | 0.7360 | 1.1103 | 0.7469 | 0.7926 | 0.8465 | 0.0888 |
| QRSL1     | 0.8384 | 0.9705 | 0.8640 | 0.7130 | 0.8465 | 0.0529 |
| C7orf43   | 0.8254 | 0.9929 | 0.8230 | 0.7448 | 0.8465 | 0.0522 |
| SUMO1P3   | 0.6442 | 0.9346 | 1.0116 | 0.7958 | 0.8465 | 0.0809 |
| MIS12     | 0.6360 | 1.0762 | 0.9607 | 0.7137 | 0.8466 | 0.1032 |
| MCM3APAS  | 0.7276 | 1.0330 | 0.8951 | 0.7309 | 0.8467 | 0.0734 |
| GTF3C3    | 0.8210 | 1.0550 | 0.8876 | 0.6231 | 0.8467 | 0.0893 |
| ANKRD49   | 0.7631 | 1.1146 | 0.8271 | 0.6821 | 0.8467 | 0.0941 |
| BTBD3     | 0.7031 | 1.0972 | 0.8331 | 0.7535 | 0.8467 | 0.0877 |
| ZC3H3     | 0.7819 | 1.0827 | 0.8171 | 0.7053 | 0.8468 | 0.0821 |
| GAGE6     | 0.7282 | 1.1405 | 0.8781 | 0.6405 | 0.8468 | 0.1095 |
| ARHGAP11B | 0.7637 | 0.9364 | 0.9285 | 0.7587 | 0.8468 | 0.0495 |
| LOC392437 | 0.6284 | 1.0315 | 1.0220 | 0.7056 | 0.8469 | 0.1051 |
| ZNF485    | 0.7649 | 1.0371 | 0.8844 | 0.7013 | 0.8469 | 0.0739 |
| HNRNPH2   | 0.6291 | 1.2198 | 0.7889 | 0.7500 | 0.8469 | 0.1288 |
| KLHDC3    | 0.7098 | 1.0820 | 0.8360 | 0.7603 | 0.8470 | 0.0825 |
| SETD8     | 0.7630 | 1.0781 | 0.8580 | 0.6890 | 0.8470 | 0.0844 |
| LOC731658 | 0.7200 | 0.9202 | 0.8916 | 0.8567 | 0.8471 | 0.0443 |
| FAM80A    | 0.7179 | 1.0236 | 0.8672 | 0.7802 | 0.8472 | 0.0663 |
| EXOSC3    | 0.6508 | 1.1657 | 0.9355 | 0.6370 | 0.8472 | 0.1265 |
| ATPBD4    | 0.7789 | 0.9464 | 0.9097 | 0.7542 | 0.8473 | 0.0475 |
| THUMPD2   | 0.7156 | 1.1445 | 0.8963 | 0.6331 | 0.8474 | 0.1133 |
| SNRPD2    | 0.6377 | 1.0877 | 0.9088 | 0.7557 | 0.8475 | 0.0974 |
| C20orf100 | 0.7154 | 1.1584 | 0.8416 | 0.6745 | 0.8475 | 0.1096 |
| LOC643873 | 0.6837 | 1.0536 | 1.0785 | 0.5740 | 0.8475 | 0.1283 |
| LOC728888 | 0.8112 | 1.2074 | 0.6839 | 0.6874 | 0.8475 | 0.1236 |

|            |        |        |        |        |        |        |
|------------|--------|--------|--------|--------|--------|--------|
| PRPF38B    | 0.7161 | 1.1272 | 0.8298 | 0.7170 | 0.8475 | 0.0970 |
| GMDS       | 0.7212 | 1.0871 | 0.9108 | 0.6711 | 0.8475 | 0.0951 |
| OKL38      | 0.7610 | 1.0064 | 0.8771 | 0.7456 | 0.8475 | 0.0606 |
| COX5B      | 0.6433 | 1.2444 | 0.8743 | 0.6283 | 0.8476 | 0.1437 |
| LOC1001281 | 0.7437 | 0.9728 | 0.9033 | 0.7706 | 0.8476 | 0.0544 |
| LOC647250  | 0.7621 | 0.9355 | 0.9530 | 0.7399 | 0.8476 | 0.0561 |
| TPST2      | 0.7598 | 1.1529 | 0.7494 | 0.7284 | 0.8476 | 0.1020 |
| SPATA2     | 0.7061 | 1.0830 | 0.8586 | 0.7429 | 0.8476 | 0.0849 |
| NET1       | 0.6090 | 1.2464 | 0.8366 | 0.6986 | 0.8477 | 0.1409 |
| LOC1001281 | 0.6877 | 0.9903 | 0.9996 | 0.7133 | 0.8477 | 0.0852 |
| ZNF667     | 0.7745 | 0.9987 | 0.8041 | 0.8137 | 0.8477 | 0.0510 |
| AMOT       | 0.8469 | 1.1626 | 0.6724 | 0.7092 | 0.8478 | 0.1115 |
| APH1A      | 0.6946 | 1.0872 | 0.8500 | 0.7596 | 0.8479 | 0.0859 |
| ANKRD32    | 0.7487 | 0.9956 | 0.9191 | 0.7282 | 0.8479 | 0.0652 |
| FAF1       | 0.7897 | 1.1085 | 0.8643 | 0.6293 | 0.8480 | 0.0997 |
| WDR46      | 0.7202 | 1.1505 | 0.9308 | 0.5905 | 0.8480 | 0.1228 |
| PPHLN1     | 0.7415 | 1.1133 | 0.8627 | 0.6747 | 0.8480 | 0.0966 |
| CENPB      | 0.6812 | 1.1575 | 0.8912 | 0.6623 | 0.8481 | 0.1154 |
| XRCC2      | 0.6438 | 1.0161 | 0.9417 | 0.7908 | 0.8481 | 0.0827 |
| HIST1H2AG  | 0.6506 | 1.0839 | 0.9677 | 0.6902 | 0.8481 | 0.1056 |
| AACS       | 0.7183 | 1.0894 | 0.8819 | 0.7032 | 0.8482 | 0.0900 |
| NOL8       | 0.7179 | 1.0010 | 0.8548 | 0.8193 | 0.8482 | 0.0586 |
| PEX1       | 0.7382 | 0.9712 | 0.9148 | 0.7688 | 0.8483 | 0.0562 |
| STXBP3     | 0.7270 | 1.1551 | 0.8468 | 0.6643 | 0.8483 | 0.1090 |
| ATXN7L3    | 0.8843 | 1.0084 | 0.7779 | 0.7227 | 0.8483 | 0.0630 |
| LOC647030  | 0.7035 | 0.8849 | 1.2721 | 0.5328 | 0.8483 | 0.1585 |
| CENPH      | 0.7220 | 0.9596 | 0.8618 | 0.8503 | 0.8484 | 0.0488 |
| HNRPK      | 0.6891 | 1.1870 | 0.8938 | 0.6238 | 0.8484 | 0.1267 |
| CEP70      | 0.7813 | 1.0834 | 0.8116 | 0.7175 | 0.8484 | 0.0807 |
| LOC203547  | 0.6494 | 1.1118 | 0.9593 | 0.6737 | 0.8485 | 0.1125 |
| LOC644544  | 0.7851 | 1.0467 | 0.8545 | 0.7078 | 0.8485 | 0.0725 |
| PKP4       | 0.7041 | 1.0624 | 0.8208 | 0.8072 | 0.8486 | 0.0759 |
| WDR60      | 0.8346 | 0.9976 | 0.7446 | 0.8176 | 0.8486 | 0.0534 |
| ARSB       | 0.7944 | 1.0123 | 0.8342 | 0.7536 | 0.8486 | 0.0570 |
| CITED1     | 0.6848 | 1.0812 | 0.8578 | 0.7709 | 0.8487 | 0.0852 |
| PKNOX2     | 0.8187 | 0.9371 | 0.7517 | 0.8873 | 0.8487 | 0.0404 |
| HEXB       | 0.7137 | 1.2090 | 0.8788 | 0.5931 | 0.8487 | 0.1336 |
| PPOX       | 0.8981 | 1.0977 | 0.7231 | 0.6760 | 0.8487 | 0.0958 |
| MIR599     | 0.7306 | 0.9552 | 0.8759 | 0.8335 | 0.8488 | 0.0468 |
| IPPK       | 0.7193 | 1.0313 | 0.8379 | 0.8073 | 0.8489 | 0.0658 |
| PRPSAP1    | 0.7121 | 1.1352 | 0.9429 | 0.6059 | 0.8490 | 0.1185 |
| UBA5       | 0.7674 | 1.0551 | 0.9347 | 0.6389 | 0.8490 | 0.0916 |
| SSBP4      | 0.8291 | 1.0186 | 0.8152 | 0.7335 | 0.8491 | 0.0603 |
| AAAS       | 0.7345 | 0.9556 | 0.8623 | 0.8440 | 0.8491 | 0.0453 |
| PTPRG      | 0.7082 | 0.8698 | 1.0213 | 0.7975 | 0.8492 | 0.0662 |
| MDM1       | 0.7414 | 1.0176 | 0.8260 | 0.8119 | 0.8492 | 0.0591 |

|            |        |        |        |        |        |        |
|------------|--------|--------|--------|--------|--------|--------|
| MBD4       | 0.7798 | 0.9988 | 0.8846 | 0.7338 | 0.8493 | 0.0590 |
| MSN        | 0.6276 | 1.0612 | 0.9898 | 0.7187 | 0.8493 | 0.1044 |
| C10orf47   | 0.7159 | 1.0626 | 0.8613 | 0.7576 | 0.8494 | 0.0774 |
| UBQLN2     | 0.7682 | 1.0574 | 0.9847 | 0.5871 | 0.8494 | 0.1068 |
| ST13       | 0.7496 | 1.0493 | 0.9912 | 0.6074 | 0.8494 | 0.1035 |
| INTS1      | 0.7168 | 1.2745 | 0.7624 | 0.6442 | 0.8495 | 0.1438 |
| LOC1001305 | 0.7820 | 1.0260 | 0.8723 | 0.7177 | 0.8495 | 0.0668 |
| LOC1001286 | 0.6424 | 1.1091 | 1.0016 | 0.6450 | 0.8495 | 0.1208 |
| BMI1       | 0.7400 | 1.3148 | 0.7363 | 0.6071 | 0.8496 | 0.1581 |
| GALNT1     | 0.8457 | 0.9315 | 0.9371 | 0.6840 | 0.8496 | 0.0590 |
| C16orf93   | 0.7305 | 1.1381 | 0.8148 | 0.7150 | 0.8496 | 0.0986 |
| GNAT2      | 0.7523 | 0.9272 | 0.8827 | 0.8363 | 0.8496 | 0.0374 |
| LOC1001292 | 0.6999 | 0.9432 | 1.0013 | 0.7542 | 0.8496 | 0.0726 |
| EMD        | 0.7060 | 1.1463 | 0.9550 | 0.5916 | 0.8497 | 0.1246 |
| RAVER1     | 0.8110 | 0.8861 | 0.8697 | 0.8320 | 0.8497 | 0.0172 |
| C21orf37   | 0.8376 | 0.9744 | 0.8463 | 0.7406 | 0.8497 | 0.0480 |
| CDK2AP1    | 0.7710 | 1.1280 | 0.9074 | 0.5925 | 0.8497 | 0.1130 |
| KIAA0182   | 0.9178 | 1.2065 | 0.6421 | 0.6326 | 0.8498 | 0.1361 |
| HEATR5B    | 0.7825 | 1.1787 | 0.7555 | 0.6824 | 0.8498 | 0.1117 |
| KIAA0406   | 0.7047 | 1.0273 | 0.8577 | 0.8095 | 0.8498 | 0.0672 |
| ADNP       | 0.7618 | 0.9254 | 1.0280 | 0.6840 | 0.8498 | 0.0778 |
| FAM59A     | 0.7357 | 0.9832 | 0.9256 | 0.7553 | 0.8500 | 0.0616 |
| TIMM23B    | 0.7819 | 0.9982 | 0.8099 | 0.8098 | 0.8500 | 0.0499 |
| SLC25A26   | 0.6778 | 1.1689 | 0.8706 | 0.6826 | 0.8500 | 0.1154 |
| RRAGC      | 0.6117 | 1.2606 | 0.8526 | 0.6752 | 0.8500 | 0.1460 |
| ZNF343     | 0.7747 | 1.1015 | 0.8412 | 0.6827 | 0.8500 | 0.0899 |
| CCT6B      | 0.7296 | 1.0265 | 1.0247 | 0.6196 | 0.8501 | 0.1038 |
| ZNF143     | 0.7432 | 1.1306 | 0.8801 | 0.6469 | 0.8502 | 0.1050 |
| CINP       | 0.7775 | 1.1229 | 0.8086 | 0.6919 | 0.8502 | 0.0942 |
| SMYD2      | 0.7621 | 1.0052 | 0.8970 | 0.7373 | 0.8504 | 0.0624 |
| NAT6       | 0.7316 | 0.9719 | 0.9130 | 0.7853 | 0.8504 | 0.0555 |
| MCART1     | 0.7640 | 1.2097 | 0.8203 | 0.6082 | 0.8505 | 0.1279 |
| TARDBP     | 0.7364 | 1.0653 | 0.8116 | 0.7888 | 0.8505 | 0.0733 |
| RPL23AP7   | 0.6716 | 1.0969 | 0.8763 | 0.7574 | 0.8506 | 0.0922 |
| RIMS4      | 0.7269 | 1.0615 | 0.7720 | 0.8424 | 0.8507 | 0.0742 |
| TCTEX1D2   | 0.7828 | 1.0508 | 0.8821 | 0.6871 | 0.8507 | 0.0777 |
| PAAF1      | 0.6936 | 1.1200 | 0.8860 | 0.7034 | 0.8508 | 0.1000 |
| CHP        | 0.7377 | 0.8615 | 1.1292 | 0.6749 | 0.8508 | 0.1006 |
| DPP9       | 0.7431 | 1.1790 | 0.7888 | 0.6924 | 0.8508 | 0.1112 |
| HSDL1      | 0.8030 | 0.9651 | 0.8836 | 0.7518 | 0.8509 | 0.0468 |
| NIP30      | 0.7804 | 1.2107 | 0.7937 | 0.6188 | 0.8509 | 0.1263 |
| REEP1      | 0.7430 | 0.8767 | 0.9160 | 0.8679 | 0.8509 | 0.0375 |
| RWDD3      | 0.8334 | 1.1554 | 0.7380 | 0.6771 | 0.8510 | 0.1065 |
| FERMT1     | 0.7389 | 0.9438 | 0.9050 | 0.8163 | 0.8510 | 0.0459 |
| CXCR3      | 0.8286 | 0.9332 | 0.9488 | 0.6933 | 0.8510 | 0.0589 |
| RNF4       | 0.7648 | 1.1604 | 0.7933 | 0.6855 | 0.8510 | 0.1056 |

|            |        |        |        |        |        |        |
|------------|--------|--------|--------|--------|--------|--------|
| LOC731835  | 0.5905 | 0.8882 | 0.9925 | 0.9331 | 0.8510 | 0.0894 |
| LOC654121  | 0.5730 | 1.1864 | 1.0524 | 0.5925 | 0.8511 | 0.1574 |
| MRPS16     | 0.6707 | 1.2794 | 0.7998 | 0.6545 | 0.8511 | 0.1464 |
| F8A2       | 0.7391 | 1.0179 | 0.8538 | 0.7938 | 0.8511 | 0.0603 |
| MBLAC2     | 0.7070 | 1.0524 | 0.9548 | 0.6907 | 0.8512 | 0.0903 |
| BUD13      | 0.8390 | 0.9305 | 0.9077 | 0.7277 | 0.8512 | 0.0455 |
| FAM75B     | 0.7429 | 0.9842 | 0.9513 | 0.7272 | 0.8514 | 0.0676 |
| LOC646038  | 0.8075 | 1.0960 | 0.7627 | 0.7393 | 0.8514 | 0.0828 |
| DAZAP2     | 0.7951 | 1.0450 | 0.8188 | 0.7468 | 0.8514 | 0.0662 |
| USP7       | 0.6817 | 1.1484 | 0.7896 | 0.7861 | 0.8514 | 0.1021 |
| KIAA1731   | 0.7866 | 0.9728 | 0.9672 | 0.6792 | 0.8515 | 0.0719 |
| LOC1001336 | 0.6898 | 0.9492 | 0.8274 | 0.9396 | 0.8515 | 0.0606 |
| SNX7       | 0.7745 | 0.9603 | 0.9477 | 0.7237 | 0.8516 | 0.0601 |
| GTF2H2     | 0.6843 | 0.9343 | 0.9756 | 0.8121 | 0.8516 | 0.0657 |
| PMAIP1     | 0.7854 | 0.8563 | 0.9774 | 0.7873 | 0.8516 | 0.0451 |
| E2F8       | 0.7410 | 1.0291 | 0.8256 | 0.8109 | 0.8516 | 0.0620 |
| RRP12      | 0.6857 | 1.1549 | 0.8446 | 0.7215 | 0.8517 | 0.1066 |
| LRIG1      | 0.8720 | 0.9914 | 0.9230 | 0.6205 | 0.8517 | 0.0809 |
| LOC651064  | 0.7529 | 0.9699 | 0.9849 | 0.6991 | 0.8517 | 0.0735 |
| CHERP      | 0.6582 | 1.1254 | 0.9331 | 0.6902 | 0.8517 | 0.1099 |
| FBXO8      | 0.6730 | 1.0381 | 1.0505 | 0.6454 | 0.8517 | 0.1113 |
| GEMIN8     | 0.7675 | 1.0623 | 0.8966 | 0.6805 | 0.8517 | 0.0830 |
| POLR2I     | 0.6424 | 1.2018 | 0.8566 | 0.7062 | 0.8517 | 0.1250 |
| DEAF1      | 0.8636 | 1.0475 | 0.8014 | 0.6945 | 0.8517 | 0.0740 |
| LOC1001320 | 0.7210 | 0.9750 | 0.7967 | 0.9143 | 0.8517 | 0.0572 |
| ARSD       | 0.8630 | 1.0459 | 0.7321 | 0.7659 | 0.8518 | 0.0704 |
| ARF4       | 0.7009 | 1.2817 | 0.8249 | 0.5997 | 0.8518 | 0.1505 |
| LOC728739  | 0.7335 | 1.1428 | 0.8138 | 0.7172 | 0.8518 | 0.0993 |
| PRKCD      | 0.7531 | 1.2153 | 0.7393 | 0.6997 | 0.8518 | 0.1217 |
| COPG       | 0.8059 | 0.9825 | 0.9428 | 0.6763 | 0.8519 | 0.0697 |
| MAGEA3     | 0.7208 | 1.0397 | 0.9542 | 0.6928 | 0.8519 | 0.0857 |
| TMEM56     | 0.7622 | 0.9239 | 0.9325 | 0.7891 | 0.8519 | 0.0444 |
| KCTD5      | 0.7855 | 1.1036 | 0.8163 | 0.7025 | 0.8520 | 0.0872 |
| QSOX2      | 0.7059 | 1.1366 | 0.8605 | 0.7049 | 0.8520 | 0.1017 |
| GOLPH3     | 0.7142 | 1.0029 | 1.0707 | 0.6203 | 0.8520 | 0.1093 |
| RAD23B     | 0.7923 | 1.1342 | 0.9019 | 0.5802 | 0.8522 | 0.1153 |
| LRRC20     | 0.7795 | 1.1534 | 0.8363 | 0.6395 | 0.8522 | 0.1086 |
| ASF1A      | 0.6598 | 1.1469 | 0.9426 | 0.6598 | 0.8522 | 0.1187 |
| HSPBP1     | 0.7624 | 1.0544 | 0.8807 | 0.7118 | 0.8523 | 0.0761 |
| C1orf56    | 0.9295 | 1.0371 | 0.7518 | 0.6909 | 0.8523 | 0.0797 |
| INO80C     | 0.6927 | 1.3029 | 0.7936 | 0.6202 | 0.8524 | 0.1543 |
| SLC25A35   | 0.8465 | 0.9404 | 0.8508 | 0.7720 | 0.8524 | 0.0345 |
| GPR98      | 0.8459 | 1.0752 | 0.7368 | 0.7518 | 0.8524 | 0.0781 |
| MCCC2      | 0.5892 | 1.1275 | 0.9961 | 0.6970 | 0.8524 | 0.1257 |
| MAGOH      | 0.6774 | 1.1305 | 0.8884 | 0.7137 | 0.8525 | 0.1035 |
| LRFN1      | 0.7215 | 0.9349 | 0.8841 | 0.8693 | 0.8525 | 0.0459 |

|            |        |        |        |        |        |        |
|------------|--------|--------|--------|--------|--------|--------|
| URB2       | 0.6778 | 1.1946 | 0.8312 | 0.7064 | 0.8525 | 0.1188 |
| LOC730744  | 0.6892 | 1.1086 | 0.8848 | 0.7274 | 0.8525 | 0.0953 |
| ZNF679     | 0.7199 | 1.0894 | 0.9199 | 0.6813 | 0.8526 | 0.0947 |
| CUTC       | 0.6597 | 1.1114 | 0.9223 | 0.7172 | 0.8526 | 0.1030 |
| RNY1       | 0.6708 | 1.0081 | 0.9691 | 0.7631 | 0.8528 | 0.0810 |
| RNF34      | 0.7074 | 1.0479 | 0.9461 | 0.7097 | 0.8528 | 0.0858 |
| MRPL27     | 0.7457 | 1.0659 | 0.9092 | 0.6903 | 0.8528 | 0.0849 |
| SENP2      | 0.7640 | 1.1233 | 0.8041 | 0.7201 | 0.8529 | 0.0918 |
| GTPBP6     | 0.7010 | 1.1686 | 0.9203 | 0.6219 | 0.8530 | 0.1227 |
| PIAS2      | 0.6570 | 1.2392 | 0.7875 | 0.7282 | 0.8530 | 0.1315 |
| VAV2       | 0.8132 | 1.0522 | 0.8096 | 0.7370 | 0.8530 | 0.0687 |
| LOC729774  | 0.5902 | 1.0154 | 0.9789 | 0.8275 | 0.8530 | 0.0966 |
| KATNB1     | 0.7481 | 1.1683 | 0.8603 | 0.6354 | 0.8530 | 0.1147 |
| GDF11      | 0.7660 | 1.0243 | 0.8686 | 0.7532 | 0.8530 | 0.0627 |
| FAM100A    | 0.7468 | 0.9441 | 0.8916 | 0.8297 | 0.8531 | 0.0424 |
| LOC653566  | 0.7746 | 1.0041 | 0.9682 | 0.6654 | 0.8531 | 0.0803 |
| NR2C1      | 0.7360 | 0.9923 | 0.8922 | 0.7921 | 0.8532 | 0.0565 |
| PRUNE      | 0.8205 | 1.1071 | 0.7297 | 0.7556 | 0.8532 | 0.0867 |
| ZNF165     | 0.6979 | 1.0809 | 0.9003 | 0.7338 | 0.8532 | 0.0878 |
| GRK6       | 0.7882 | 1.0812 | 0.8126 | 0.7310 | 0.8533 | 0.0779 |
| RIOK2      | 0.7124 | 1.1335 | 0.9196 | 0.6476 | 0.8533 | 0.1099 |
| UXT        | 0.6365 | 1.2106 | 0.8615 | 0.7046 | 0.8533 | 0.1281 |
| NR2F2      | 0.8182 | 0.8630 | 0.9747 | 0.7573 | 0.8533 | 0.0459 |
| C8orf48    | 0.8861 | 1.0179 | 0.8284 | 0.6809 | 0.8533 | 0.0698 |
| SLC25A14   | 0.7711 | 1.1158 | 0.8747 | 0.6519 | 0.8534 | 0.0986 |
| CYCSL1     | 0.5606 | 1.1266 | 1.0642 | 0.6623 | 0.8534 | 0.1418 |
| DNA2       | 0.7606 | 1.0059 | 0.8463 | 0.8010 | 0.8534 | 0.0537 |
| STX7       | 0.8237 | 0.9258 | 0.9219 | 0.7429 | 0.8536 | 0.0438 |
| PDCD6      | 0.7865 | 1.0646 | 0.9055 | 0.6578 | 0.8536 | 0.0866 |
| CCDC50     | 0.7159 | 1.0810 | 0.9651 | 0.6523 | 0.8536 | 0.1015 |
| PHLDB1     | 0.8862 | 1.0750 | 0.7703 | 0.6830 | 0.8536 | 0.0847 |
| BBS10      | 0.7099 | 1.1642 | 0.8389 | 0.7018 | 0.8537 | 0.1081 |
| CSNK2A1    | 0.6893 | 1.1802 | 0.8536 | 0.6918 | 0.8537 | 0.1154 |
| LOC1001329 | 0.7596 | 0.9528 | 0.8998 | 0.8026 | 0.8537 | 0.0442 |
| DHRS2      | 0.6513 | 0.9014 | 0.9725 | 0.8897 | 0.8538 | 0.0699 |
| EIF5B      | 0.6237 | 1.1115 | 0.9293 | 0.7506 | 0.8538 | 0.1064 |
| LOC401127  | 0.7874 | 0.9503 | 0.8994 | 0.7783 | 0.8538 | 0.0423 |
| LOC387703  | 0.8572 | 1.0857 | 0.8815 | 0.5913 | 0.8539 | 0.1014 |
| UBE2L3     | 0.8602 | 0.9717 | 0.8510 | 0.7330 | 0.8540 | 0.0488 |
| RPL7L1     | 0.6237 | 1.3372 | 0.8032 | 0.6519 | 0.8540 | 0.1658 |
| LPIN1      | 0.6839 | 1.1397 | 0.9048 | 0.6878 | 0.8540 | 0.1083 |
| TMEM189-U  | 0.6524 | 1.1530 | 0.9154 | 0.6956 | 0.8541 | 0.1151 |
| ATF6       | 0.6775 | 1.0570 | 0.9729 | 0.7090 | 0.8541 | 0.0946 |
| NPL        | 0.7528 | 1.0558 | 0.9006 | 0.7074 | 0.8542 | 0.0789 |
| DBNL       | 0.7314 | 1.1390 | 0.8687 | 0.6778 | 0.8542 | 0.1031 |
| C5orf51    | 0.7266 | 1.1469 | 0.8172 | 0.7265 | 0.8543 | 0.0998 |



|            |        |        |        |        |        |        |
|------------|--------|--------|--------|--------|--------|--------|
| DSG2       | 0.7334 | 1.1108 | 0.9006 | 0.6725 | 0.8543 | 0.0982 |
| KREMEN2    | 0.8116 | 1.0142 | 0.8014 | 0.7901 | 0.8543 | 0.0535 |
| SCFD2      | 0.6764 | 0.9550 | 1.0718 | 0.7143 | 0.8544 | 0.0952 |
| NCRNA00085 | 0.8584 | 0.9400 | 0.9220 | 0.6972 | 0.8544 | 0.0552 |
| KLHL17     | 0.7212 | 1.0785 | 0.8036 | 0.8142 | 0.8544 | 0.0775 |
| VRK2       | 0.7332 | 0.9277 | 1.0659 | 0.6910 | 0.8544 | 0.0873 |
| WDR92      | 0.6967 | 0.9889 | 0.9003 | 0.8323 | 0.8545 | 0.0616 |
| LOC644584  | 0.8385 | 1.1377 | 0.7470 | 0.6951 | 0.8546 | 0.0989 |
| LOC143666  | 0.8729 | 1.1289 | 0.7276 | 0.6892 | 0.8546 | 0.0996 |
| LOC729769  | 0.7480 | 0.9464 | 1.0780 | 0.6462 | 0.8547 | 0.0971 |
| LOC645452  | 0.6644 | 1.1663 | 0.9342 | 0.6538 | 0.8547 | 0.1225 |
| FBXO30     | 0.7700 | 0.9872 | 0.9072 | 0.7546 | 0.8548 | 0.0559 |
| LOC1001332 | 0.7536 | 0.9804 | 0.8852 | 0.7999 | 0.8548 | 0.0500 |
| KDELC1     | 0.8703 | 0.9711 | 0.8810 | 0.6970 | 0.8548 | 0.0573 |
| PHB        | 0.7446 | 1.1234 | 0.9098 | 0.6416 | 0.8549 | 0.1052 |
| KLHL9      | 0.7938 | 1.0025 | 0.9814 | 0.6419 | 0.8549 | 0.0851 |
| LOC642236  | 0.8162 | 1.0039 | 0.9559 | 0.6440 | 0.8550 | 0.0808 |
| PAN3       | 0.7072 | 1.1852 | 0.7553 | 0.7726 | 0.8551 | 0.1109 |
| DAGLA      | 0.8193 | 1.0665 | 0.7892 | 0.7453 | 0.8551 | 0.0721 |
| METRN      | 0.6494 | 1.0729 | 0.9972 | 0.7011 | 0.8552 | 0.1055 |
| C12orf30   | 0.6668 | 1.1523 | 0.8853 | 0.7163 | 0.8552 | 0.1095 |
| STK11IP    | 0.8665 | 0.9158 | 0.7793 | 0.8593 | 0.8552 | 0.0283 |
| PPP2R3C    | 0.7094 | 1.0412 | 0.9749 | 0.6954 | 0.8552 | 0.0893 |
| PPP4R1     | 0.7256 | 1.1594 | 0.8972 | 0.6387 | 0.8552 | 0.1147 |
| RGPD6      | 0.8711 | 0.8849 | 0.8290 | 0.8359 | 0.8552 | 0.0135 |
| LOC1001709 | 0.8614 | 1.1651 | 0.6758 | 0.7187 | 0.8553 | 0.1106 |
| C21orf59   | 0.7377 | 1.1098 | 0.8693 | 0.7043 | 0.8553 | 0.0920 |
| LOC645733  | 0.9046 | 0.9385 | 0.7810 | 0.7971 | 0.8553 | 0.0390 |
| LOC1001338 | 0.7240 | 0.8554 | 1.1910 | 0.6510 | 0.8553 | 0.1196 |
| DDX54      | 0.7288 | 1.0395 | 0.8799 | 0.7732 | 0.8554 | 0.0691 |
| EIF3G      | 0.6546 | 1.1808 | 0.9300 | 0.6561 | 0.8554 | 0.1263 |
| FGD3       | 0.7821 | 1.0516 | 0.8221 | 0.7657 | 0.8554 | 0.0665 |
| EAPP       | 0.7120 | 0.9421 | 1.1198 | 0.6477 | 0.8554 | 0.1084 |
| MLLT11     | 0.7657 | 1.0766 | 0.8772 | 0.7026 | 0.8555 | 0.0821 |
| BAIAP2L1   | 0.6987 | 1.2218 | 0.8278 | 0.6739 | 0.8555 | 0.1267 |
| DYNLT3     | 0.7759 | 0.9412 | 0.9374 | 0.7679 | 0.8556 | 0.0484 |
| HSD11B1L   | 0.8587 | 1.0403 | 0.7965 | 0.7271 | 0.8556 | 0.0672 |
| CHST3      | 0.7847 | 1.0249 | 0.7823 | 0.8308 | 0.8557 | 0.0575 |
| PREI3      | 0.7237 | 1.1876 | 0.8894 | 0.6221 | 0.8557 | 0.1236 |
| TCP11L1    | 0.7596 | 0.9774 | 0.8544 | 0.8317 | 0.8558 | 0.0453 |
| MRPS24     | 0.6695 | 1.2203 | 0.7902 | 0.7431 | 0.8558 | 0.1240 |
| STK4       | 0.7223 | 1.0480 | 0.8464 | 0.8064 | 0.8558 | 0.0691 |
| ATP6V1D    | 0.7058 | 1.0067 | 0.9744 | 0.7362 | 0.8558 | 0.0783 |
| GTF2A1     | 0.7968 | 0.9820 | 0.8846 | 0.7597 | 0.8558 | 0.0496 |
| SACM1L     | 0.7040 | 1.0773 | 1.0444 | 0.5974 | 0.8558 | 0.1206 |
| KIAA1161   | 0.8063 | 1.0077 | 0.9219 | 0.6874 | 0.8558 | 0.0697 |

|            |        |        |        |        |        |        |
|------------|--------|--------|--------|--------|--------|--------|
| LOC1001339 | 0.6858 | 1.0072 | 0.9072 | 0.8232 | 0.8559 | 0.0680 |
| BPNT1      | 0.6780 | 0.9804 | 1.0512 | 0.7141 | 0.8559 | 0.0937 |
| CEP63      | 0.6931 | 1.0658 | 0.8849 | 0.7801 | 0.8560 | 0.0802 |
| CYTH3      | 0.7780 | 1.1147 | 0.7307 | 0.8005 | 0.8560 | 0.0875 |
| SRD5A1     | 0.7584 | 1.0467 | 0.9438 | 0.6752 | 0.8560 | 0.0848 |
| LOC728620  | 0.7026 | 1.0187 | 1.0033 | 0.6996 | 0.8561 | 0.0895 |
| HOOK2      | 0.8173 | 1.2385 | 0.7078 | 0.6606 | 0.8561 | 0.1316 |
| ZNF215     | 0.8030 | 0.9164 | 0.9429 | 0.7621 | 0.8561 | 0.0436 |
| RALA       | 0.9217 | 1.0501 | 0.8716 | 0.5810 | 0.8561 | 0.0991 |
| LRPPRC     | 0.6217 | 1.3261 | 0.7897 | 0.6870 | 0.8561 | 0.1604 |
| LOC1001339 | 0.7898 | 1.0088 | 0.8016 | 0.8244 | 0.8562 | 0.0514 |
| CCT4       | 0.6773 | 0.9587 | 1.0391 | 0.7497 | 0.8562 | 0.0853 |
| GTPBP4     | 0.6568 | 1.1308 | 0.9071 | 0.7305 | 0.8563 | 0.1055 |
| ZFP161     | 0.8782 | 1.0040 | 0.8227 | 0.7203 | 0.8563 | 0.0591 |
| LOC642458  | 0.7722 | 0.9437 | 0.8865 | 0.8228 | 0.8563 | 0.0373 |
| HSPA13     | 0.9036 | 0.9822 | 0.7184 | 0.8212 | 0.8563 | 0.0565 |
| MFSD5      | 0.8406 | 1.1694 | 0.7763 | 0.6391 | 0.8564 | 0.1125 |
| HNRPUL1    | 0.7338 | 1.0380 | 0.9055 | 0.7482 | 0.8564 | 0.0720 |
| MITD1      | 0.6290 | 1.1100 | 0.8872 | 0.7995 | 0.8564 | 0.1001 |
| UTP3       | 0.7359 | 0.9801 | 1.0093 | 0.7007 | 0.8565 | 0.0803 |
| SEC63      | 0.7076 | 1.0465 | 0.8251 | 0.8471 | 0.8565 | 0.0703 |
| SNORA9     | 0.8061 | 0.9741 | 0.8663 | 0.7797 | 0.8565 | 0.0432 |
| TMEM184A   | 0.8233 | 1.0000 | 0.8770 | 0.7259 | 0.8566 | 0.0571 |
| STRADA     | 0.8434 | 1.1276 | 0.8055 | 0.6499 | 0.8566 | 0.0996 |
| SLC35F5    | 0.6908 | 1.1772 | 0.8973 | 0.6611 | 0.8566 | 0.1191 |
| RAD51L3    | 0.7362 | 1.0271 | 0.8862 | 0.7769 | 0.8566 | 0.0651 |
| FTSJ2      | 0.6782 | 1.1129 | 0.9316 | 0.7040 | 0.8567 | 0.1026 |
| ERICH1     | 0.6778 | 1.1082 | 0.9435 | 0.6974 | 0.8567 | 0.1034 |
| WBSCR27    | 0.8149 | 1.0498 | 0.9183 | 0.6439 | 0.8567 | 0.0857 |
| PALB2      | 0.8361 | 1.0073 | 0.8021 | 0.7814 | 0.8567 | 0.0514 |
| MAP3K8     | 0.7346 | 1.0214 | 0.8426 | 0.8286 | 0.8568 | 0.0599 |
| SASS6      | 0.7618 | 0.9917 | 0.8718 | 0.8019 | 0.8568 | 0.0504 |
| MAP2K4     | 0.7887 | 0.9585 | 1.0070 | 0.6730 | 0.8568 | 0.0771 |
| ANO6       | 0.9123 | 0.9682 | 0.7831 | 0.7637 | 0.8568 | 0.0496 |
| IRF2BP2    | 0.6747 | 1.1636 | 0.8541 | 0.7349 | 0.8568 | 0.1089 |
| COMTD1     | 0.9939 | 0.9278 | 0.7525 | 0.7531 | 0.8568 | 0.0616 |
| WBSCR22    | 0.7159 | 1.1922 | 0.8150 | 0.7044 | 0.8569 | 0.1145 |
| SLC25A46   | 0.7154 | 0.9909 | 1.0364 | 0.6849 | 0.8569 | 0.0912 |
| NLGN2      | 0.8403 | 0.9282 | 0.8197 | 0.8395 | 0.8569 | 0.0242 |
| IQCK       | 0.8186 | 0.9473 | 0.9314 | 0.7304 | 0.8569 | 0.0510 |
| LOC1001332 | 0.7447 | 0.9007 | 1.0189 | 0.7633 | 0.8569 | 0.0642 |
| C18orf32   | 0.7191 | 0.9860 | 1.0259 | 0.6967 | 0.8569 | 0.0865 |
| MNAT1      | 0.7265 | 0.9129 | 1.0452 | 0.7436 | 0.8570 | 0.0755 |
| MCTP2      | 0.6859 | 1.2122 | 0.8230 | 0.7072 | 0.8571 | 0.1221 |
| TMEM64     | 0.7545 | 0.9644 | 0.9447 | 0.7648 | 0.8571 | 0.0564 |
| LOC650826  | 0.8294 | 1.0971 | 0.8241 | 0.6778 | 0.8571 | 0.0874 |

|           |        |        |        |        |        |        |
|-----------|--------|--------|--------|--------|--------|--------|
| SIRPA     | 0.8509 | 0.9573 | 0.7992 | 0.8215 | 0.8572 | 0.0350 |
| RP9       | 0.6569 | 1.1701 | 0.7560 | 0.8463 | 0.8573 | 0.1112 |
| PSME1     | 0.6481 | 1.1511 | 0.9575 | 0.6726 | 0.8573 | 0.1205 |
| PFKFB4    | 0.8809 | 1.0126 | 0.8016 | 0.7345 | 0.8574 | 0.0598 |
| GAGE12E   | 0.5174 | 1.1597 | 0.9947 | 0.7580 | 0.8574 | 0.1402 |
| UPF1      | 0.7016 | 1.2122 | 0.7544 | 0.7617 | 0.8575 | 0.1190 |
| MAP7      | 0.6977 | 1.1471 | 0.8319 | 0.7532 | 0.8575 | 0.1004 |
| GLTPD1    | 0.6812 | 1.1474 | 0.8529 | 0.7485 | 0.8575 | 0.1029 |
| LARP7     | 0.6967 | 1.1564 | 0.9126 | 0.6644 | 0.8575 | 0.1138 |
| LOC727758 | 0.7281 | 1.0956 | 0.9007 | 0.7058 | 0.8576 | 0.0905 |
| PDE6D     | 0.8236 | 1.0185 | 0.8555 | 0.7326 | 0.8576 | 0.0596 |
| TBL3      | 0.7867 | 1.0134 | 0.8540 | 0.7764 | 0.8576 | 0.0547 |
| DHRX      | 0.8708 | 0.9981 | 0.7918 | 0.7699 | 0.8577 | 0.0516 |
| EIF4ENIF1 | 0.6164 | 1.2226 | 0.9121 | 0.6797 | 0.8577 | 0.1372 |
| SAMD1     | 0.6700 | 1.0526 | 0.9197 | 0.7886 | 0.8577 | 0.0826 |
| CECR4     | 0.7699 | 1.0665 | 0.8234 | 0.7711 | 0.8577 | 0.0707 |
| PTPLAD1   | 0.6748 | 1.1435 | 0.9717 | 0.6410 | 0.8577 | 0.1208 |
| SLC3A2    | 0.6844 | 1.1117 | 0.8739 | 0.7611 | 0.8578 | 0.0932 |
| LOC729317 | 0.5818 | 1.1850 | 1.0413 | 0.6233 | 0.8579 | 0.1505 |
| GAPDH     | 0.7016 | 1.1174 | 0.9431 | 0.6692 | 0.8579 | 0.1059 |
| LOC649991 | 0.8490 | 0.9409 | 0.9562 | 0.6854 | 0.8579 | 0.0622 |
| LOC653308 | 0.8138 | 1.0447 | 0.9103 | 0.6627 | 0.8579 | 0.0805 |
| AKAP10    | 0.8338 | 1.0663 | 0.7508 | 0.7807 | 0.8579 | 0.0715 |
| FANCF     | 0.7188 | 0.8925 | 0.9262 | 0.8942 | 0.8579 | 0.0470 |
| TXLNA     | 0.8457 | 1.1777 | 0.7655 | 0.6434 | 0.8581 | 0.1144 |
| PECR      | 0.6791 | 1.1810 | 0.9355 | 0.6369 | 0.8581 | 0.1262 |
| MRPL34    | 0.7654 | 1.1287 | 0.8364 | 0.7020 | 0.8581 | 0.0943 |
| DDRGK1    | 0.5933 | 1.3186 | 0.8583 | 0.6624 | 0.8582 | 0.1634 |
| CRTC2     | 0.7751 | 1.0446 | 0.7986 | 0.8145 | 0.8582 | 0.0627 |
| TFB1M     | 0.7040 | 1.2084 | 0.9081 | 0.6124 | 0.8582 | 0.1321 |
| DET1      | 0.7624 | 1.0523 | 0.8228 | 0.7955 | 0.8583 | 0.0658 |
| PDP2      | 0.6446 | 1.0813 | 0.8720 | 0.8353 | 0.8583 | 0.0895 |
| UHL3      | 0.7178 | 1.1809 | 0.9042 | 0.6304 | 0.8583 | 0.1217 |
| FHL3      | 0.7202 | 1.0116 | 0.8612 | 0.8403 | 0.8583 | 0.0598 |
| PANK2     | 0.6855 | 1.0915 | 0.9325 | 0.7238 | 0.8583 | 0.0948 |
| IGF2R     | 0.8988 | 1.3455 | 0.6054 | 0.5837 | 0.8584 | 0.1776 |
| ZBTB24    | 0.6969 | 1.3048 | 0.7402 | 0.6917 | 0.8584 | 0.1492 |
| DTWD2     | 0.6164 | 1.0244 | 1.0842 | 0.7091 | 0.8585 | 0.1153 |
| MPHOSPH8  | 0.7085 | 1.2608 | 0.7996 | 0.6652 | 0.8585 | 0.1370 |
| GK        | 0.6976 | 1.1116 | 0.8821 | 0.7430 | 0.8586 | 0.0930 |
| TRIB3     | 0.8229 | 1.1152 | 0.8819 | 0.6147 | 0.8586 | 0.1029 |
| C16orf57  | 0.8676 | 1.0866 | 0.7511 | 0.7294 | 0.8587 | 0.0818 |
| ATP5E     | 0.6624 | 1.2619 | 0.8276 | 0.6830 | 0.8587 | 0.1393 |
| MFSD10    | 0.7276 | 1.2388 | 0.7984 | 0.6702 | 0.8587 | 0.1294 |
| SLC1A1    | 0.7969 | 0.9271 | 0.9048 | 0.8063 | 0.8588 | 0.0334 |
| MRPL47    | 0.8169 | 1.0523 | 0.9885 | 0.5776 | 0.8588 | 0.1061 |

|           |        |        |        |        |        |        |
|-----------|--------|--------|--------|--------|--------|--------|
| DDX52     | 0.8032 | 0.9023 | 0.9725 | 0.7580 | 0.8590 | 0.0484 |
| EIF4H     | 0.7438 | 1.2324 | 0.7928 | 0.6672 | 0.8590 | 0.1271 |
| LOC648570 | 0.7800 | 0.8424 | 0.9657 | 0.8482 | 0.8591 | 0.0388 |
| ICT1      | 0.7222 | 1.0514 | 0.9347 | 0.7281 | 0.8591 | 0.0809 |
| AEBP2     | 0.7581 | 1.1130 | 0.9050 | 0.6602 | 0.8591 | 0.0985 |
| MIR300    | 0.6975 | 1.0475 | 0.8879 | 0.8036 | 0.8591 | 0.0739 |
| HPCAL1    | 0.7126 | 1.1192 | 0.8865 | 0.7184 | 0.8592 | 0.0956 |
| APOLD1    | 0.8438 | 1.0446 | 0.8744 | 0.6738 | 0.8592 | 0.0759 |
| ARL6IP6   | 0.7735 | 1.1435 | 0.8338 | 0.6859 | 0.8592 | 0.0995 |
| LOC643233 | 0.7162 | 1.0184 | 0.8469 | 0.8553 | 0.8592 | 0.0619 |
| MGC35361  | 0.7843 | 1.1666 | 0.7282 | 0.7578 | 0.8592 | 0.1031 |
| RSL24D1   | 0.6746 | 1.1255 | 1.0571 | 0.5799 | 0.8593 | 0.1361 |
| RNF181    | 0.8028 | 1.0654 | 0.9397 | 0.6294 | 0.8593 | 0.0935 |
| CCT8      | 0.6395 | 1.0613 | 1.0481 | 0.6886 | 0.8594 | 0.1133 |
| GOLT1B    | 0.8566 | 1.0073 | 0.8840 | 0.6897 | 0.8594 | 0.0654 |
| SLC7A7    | 0.7575 | 1.0412 | 0.8977 | 0.7414 | 0.8594 | 0.0700 |
| ZBTB41    | 0.7946 | 1.1150 | 0.7874 | 0.7406 | 0.8594 | 0.0860 |
| TTC18     | 0.7796 | 1.0147 | 0.8067 | 0.8369 | 0.8595 | 0.0531 |
| BRD1      | 0.8075 | 0.9756 | 0.9219 | 0.7333 | 0.8596 | 0.0548 |
| UBE2D2    | 0.7356 | 1.0065 | 0.9372 | 0.7590 | 0.8596 | 0.0665 |
| FLJ45337  | 0.7035 | 1.1231 | 0.9596 | 0.6522 | 0.8596 | 0.1106 |
| PIM1      | 0.8612 | 0.9472 | 0.8421 | 0.7878 | 0.8596 | 0.0331 |
| SNRNP48   | 0.7685 | 1.0891 | 0.9004 | 0.6803 | 0.8596 | 0.0889 |
| ZC3H18    | 0.7384 | 0.9275 | 0.9152 | 0.8574 | 0.8596 | 0.0432 |
| MGAT4B    | 0.8254 | 1.0757 | 0.7623 | 0.7752 | 0.8597 | 0.0733 |
| ABTB2     | 0.8043 | 1.0671 | 0.8558 | 0.7117 | 0.8597 | 0.0753 |
| C11orf58  | 0.7818 | 1.1136 | 0.8070 | 0.7366 | 0.8597 | 0.0859 |
| PIGY      | 0.6815 | 1.0792 | 0.9815 | 0.6969 | 0.8598 | 0.1005 |
| IQCC      | 0.7426 | 1.1634 | 0.8959 | 0.6374 | 0.8598 | 0.1143 |
| DDIT4     | 0.8994 | 1.1017 | 0.7858 | 0.6524 | 0.8598 | 0.0951 |
| UBE2G1    | 0.8535 | 1.0821 | 0.8621 | 0.6415 | 0.8598 | 0.0900 |
| SHANK3    | 0.7606 | 1.1276 | 0.8515 | 0.6998 | 0.8599 | 0.0945 |
| PRPF38A   | 0.8172 | 1.1544 | 0.8456 | 0.6226 | 0.8599 | 0.1100 |
| PICALM    | 0.6997 | 1.1580 | 0.9256 | 0.6565 | 0.8599 | 0.1155 |
| SNORA64   | 0.6790 | 1.0282 | 0.9013 | 0.8313 | 0.8600 | 0.0728 |
| LOC644517 | 0.7265 | 1.0455 | 0.8801 | 0.7878 | 0.8600 | 0.0694 |
| PRKAG2    | 0.7594 | 1.0073 | 0.9358 | 0.7380 | 0.8601 | 0.0661 |
| NDUFB9    | 0.7482 | 1.0597 | 1.0171 | 0.6155 | 0.8601 | 0.1068 |
| METTL11A  | 0.6698 | 1.0968 | 0.9216 | 0.7523 | 0.8601 | 0.0947 |
| SDHAF1    | 0.7542 | 1.2252 | 0.8038 | 0.6573 | 0.8601 | 0.1254 |
| GNAI2     | 0.9112 | 1.0411 | 0.8171 | 0.6712 | 0.8601 | 0.0779 |
| PHF19     | 0.7977 | 1.0655 | 0.8166 | 0.7609 | 0.8602 | 0.0694 |
| C9orf23   | 0.7166 | 1.1182 | 0.9060 | 0.6999 | 0.8602 | 0.0979 |
| TET1      | 0.7809 | 0.8832 | 0.8700 | 0.9067 | 0.8602 | 0.0275 |
| CYCS      | 0.7766 | 1.1296 | 0.8416 | 0.6931 | 0.8602 | 0.0948 |
| TSPYL6    | 0.7470 | 0.8981 | 1.0386 | 0.7575 | 0.8603 | 0.0687 |

|           |        |        |        |        |        |        |
|-----------|--------|--------|--------|--------|--------|--------|
| TIPRL     | 0.6595 | 1.1411 | 0.9240 | 0.7168 | 0.8604 | 0.1095 |
| MED22     | 0.6889 | 1.3200 | 0.7757 | 0.6570 | 0.8604 | 0.1552 |
| NAF1      | 0.6889 | 1.1233 | 0.8477 | 0.7816 | 0.8604 | 0.0935 |
| C7orf40   | 0.5962 | 1.1470 | 1.0019 | 0.6966 | 0.8604 | 0.1287 |
| C10orf137 | 0.7556 | 1.0424 | 0.9380 | 0.7056 | 0.8604 | 0.0786 |
| CAP1      | 0.7532 | 1.1121 | 0.8467 | 0.7299 | 0.8605 | 0.0876 |
| COPS7B    | 0.7557 | 1.1119 | 0.7961 | 0.7782 | 0.8605 | 0.0842 |
| SLC35B2   | 0.8386 | 1.1624 | 0.8326 | 0.6086 | 0.8606 | 0.1140 |
| C11orf51  | 0.7426 | 0.9991 | 1.0088 | 0.6917 | 0.8606 | 0.0835 |
| TUBB4     | 0.7152 | 1.1766 | 0.8073 | 0.7432 | 0.8606 | 0.1071 |
| TCHP      | 0.7603 | 1.0530 | 0.9386 | 0.6905 | 0.8606 | 0.0827 |
| ZBTB17    | 0.8468 | 1.2240 | 0.5721 | 0.7998 | 0.8607 | 0.1351 |
| MAL2      | 0.6999 | 1.0780 | 0.9107 | 0.7541 | 0.8607 | 0.0851 |
| NMB       | 0.7874 | 0.9516 | 0.8981 | 0.8056 | 0.8607 | 0.0388 |
| TCF19     | 0.7814 | 0.9841 | 0.8534 | 0.8240 | 0.8607 | 0.0437 |
| TRIM66    | 0.6781 | 1.0336 | 1.0043 | 0.7270 | 0.8607 | 0.0921 |
| C20orf177 | 0.5952 | 1.1971 | 0.8729 | 0.7779 | 0.8608 | 0.1261 |
| CYB561D2  | 0.6895 | 1.1108 | 0.9269 | 0.7159 | 0.8608 | 0.0988 |
| TRIM65    | 0.7992 | 1.0236 | 0.8232 | 0.7972 | 0.8608 | 0.0546 |
| NFS1      | 0.7521 | 1.0842 | 0.8622 | 0.7447 | 0.8608 | 0.0792 |
| B3GAT3    | 0.7603 | 0.9834 | 0.7792 | 0.9204 | 0.8609 | 0.0543 |
| ZC3H14    | 0.7624 | 1.0321 | 0.9058 | 0.7432 | 0.8609 | 0.0676 |
| GAGE12D   | 0.7506 | 0.9054 | 1.0983 | 0.6895 | 0.8609 | 0.0912 |
| IFT20     | 0.6398 | 0.9986 | 1.0163 | 0.7891 | 0.8609 | 0.0900 |
| SOCS4     | 0.7112 | 1.0457 | 0.9319 | 0.7551 | 0.8610 | 0.0779 |
| FASTKD3   | 0.6642 | 1.2334 | 0.8139 | 0.7323 | 0.8610 | 0.1279 |
| MED7      | 0.7913 | 1.0259 | 0.8885 | 0.7383 | 0.8610 | 0.0631 |
| NEURL1B   | 0.7752 | 1.1117 | 0.8280 | 0.7293 | 0.8611 | 0.0859 |
| RAB15     | 0.8254 | 0.9794 | 0.8792 | 0.7604 | 0.8611 | 0.0463 |
| HLA-E     | 0.6764 | 1.1225 | 0.8942 | 0.7515 | 0.8611 | 0.0981 |
| LOC728554 | 0.9038 | 1.1148 | 0.8770 | 0.5493 | 0.8612 | 0.1168 |
| EDC4      | 0.8065 | 1.1485 | 0.7949 | 0.6951 | 0.8612 | 0.0990 |
| HSP90AB1  | 0.7882 | 1.1481 | 0.8953 | 0.6134 | 0.8613 | 0.1119 |
| EDG7      | 0.5821 | 1.2351 | 0.9420 | 0.6858 | 0.8613 | 0.1458 |
| TUT1      | 0.9231 | 1.0215 | 0.8226 | 0.6783 | 0.8614 | 0.0733 |
| C14orf133 | 0.8083 | 0.9936 | 0.8938 | 0.7498 | 0.8614 | 0.0531 |
| SNORA63   | 0.6881 | 1.0543 | 0.9432 | 0.7600 | 0.8614 | 0.0838 |
| B4GALNT1  | 0.8309 | 0.9397 | 0.7984 | 0.8769 | 0.8614 | 0.0306 |
| MRPL53    | 0.7820 | 1.1577 | 0.8498 | 0.6563 | 0.8615 | 0.1066 |
| PHYH      | 0.8143 | 1.0324 | 0.8989 | 0.7007 | 0.8616 | 0.0699 |
| KLHL5     | 0.7359 | 1.0541 | 0.9355 | 0.7209 | 0.8616 | 0.0807 |
| LOC152024 | 0.7759 | 0.9706 | 0.9658 | 0.7341 | 0.8616 | 0.0621 |
| RPN2      | 0.7967 | 0.9730 | 1.0042 | 0.6727 | 0.8616 | 0.0778 |
| USP21     | 0.7511 | 1.0717 | 0.9001 | 0.7237 | 0.8616 | 0.0800 |
| PNMA3     | 0.7600 | 0.9589 | 0.9099 | 0.8178 | 0.8617 | 0.0448 |
| FFAR2     | 0.7889 | 0.9825 | 0.8322 | 0.8430 | 0.8617 | 0.0419 |

|           |        |        |        |        |        |        |
|-----------|--------|--------|--------|--------|--------|--------|
| LOC647121 | 0.8481 | 0.8680 | 0.9084 | 0.8222 | 0.8617 | 0.0182 |
| POFUT1    | 0.6419 | 1.2088 | 0.9138 | 0.6825 | 0.8617 | 0.1303 |
| RNF125    | 0.7560 | 1.0546 | 0.8659 | 0.7704 | 0.8617 | 0.0688 |
| CLK1      | 0.7888 | 1.0823 | 0.8098 | 0.7661 | 0.8618 | 0.0741 |
| SH3BGRL   | 0.8704 | 0.9603 | 0.9271 | 0.6892 | 0.8618 | 0.0605 |
| NDRG2     | 0.6649 | 1.2619 | 0.8428 | 0.6777 | 0.8618 | 0.1394 |
| C8orf51   | 0.7329 | 1.0435 | 0.9159 | 0.7550 | 0.8618 | 0.0730 |
| GPR63     | 0.7497 | 1.0180 | 0.8675 | 0.8121 | 0.8619 | 0.0573 |
| HEATR1    | 0.6529 | 1.2855 | 0.7768 | 0.7323 | 0.8619 | 0.1435 |
| LOC729692 | 0.6856 | 1.0291 | 0.9525 | 0.7808 | 0.8620 | 0.0784 |
| PRSS1     | 0.8301 | 0.9471 | 0.8190 | 0.8519 | 0.8620 | 0.0292 |
| ST7       | 0.7014 | 1.2278 | 0.9147 | 0.6043 | 0.8621 | 0.1381 |
| MPPE1     | 0.8811 | 1.0514 | 0.8509 | 0.6650 | 0.8621 | 0.0791 |
| RPS6KA4   | 0.9844 | 0.9607 | 0.7382 | 0.7652 | 0.8621 | 0.0642 |
| ITGB4BP   | 0.6534 | 1.1474 | 0.9713 | 0.6763 | 0.8621 | 0.1195 |
| PTRH2     | 0.8003 | 1.1044 | 0.8455 | 0.6984 | 0.8621 | 0.0864 |
| PCYOX1L   | 0.8239 | 1.0316 | 0.9194 | 0.6739 | 0.8622 | 0.0758 |
| ETNK1     | 0.7133 | 1.0520 | 1.0012 | 0.6824 | 0.8622 | 0.0957 |
| NCAPH2    | 0.7603 | 0.9989 | 0.9008 | 0.7889 | 0.8622 | 0.0547 |
| KDEL2     | 0.7093 | 1.2244 | 0.9300 | 0.5852 | 0.8622 | 0.1402 |
| ZNF318    | 0.7597 | 1.0507 | 0.8403 | 0.7985 | 0.8623 | 0.0649 |
| LOC390876 | 0.8316 | 0.8628 | 0.9189 | 0.8360 | 0.8623 | 0.0201 |
| PYGL      | 0.8645 | 0.9663 | 0.8606 | 0.7579 | 0.8623 | 0.0426 |
| SOD1      | 0.6648 | 1.1115 | 1.0224 | 0.6507 | 0.8624 | 0.1195 |
| SYCE2     | 0.7834 | 0.9216 | 0.9433 | 0.8014 | 0.8624 | 0.0408 |
| DDX56     | 0.7985 | 1.0847 | 0.8315 | 0.7350 | 0.8624 | 0.0767 |
| LUC7L2    | 0.7922 | 0.8802 | 0.9473 | 0.8301 | 0.8625 | 0.0335 |
| MIF       | 0.7262 | 1.0549 | 0.9580 | 0.7109 | 0.8625 | 0.0855 |
| VPS33A    | 0.6911 | 1.1751 | 0.8069 | 0.7770 | 0.8625 | 0.1070 |
| ATXN7L2   | 0.7744 | 0.9964 | 0.7873 | 0.8921 | 0.8625 | 0.0518 |
| SEPX1     | 0.6860 | 1.2380 | 0.8017 | 0.7245 | 0.8625 | 0.1275 |
| UTP6      | 0.7473 | 1.0360 | 0.9774 | 0.6895 | 0.8626 | 0.0849 |
| ST7OT1    | 0.7879 | 0.8532 | 0.9280 | 0.8812 | 0.8626 | 0.0293 |
| PSMB6     | 0.6747 | 1.2946 | 0.7741 | 0.7068 | 0.8626 | 0.1455 |
| TMEM17    | 0.6973 | 1.1361 | 0.9089 | 0.7079 | 0.8626 | 0.1034 |
| GAGE12H   | 0.7608 | 1.1782 | 0.8783 | 0.6331 | 0.8626 | 0.1165 |
| RAD9A     | 0.7691 | 1.0040 | 0.8773 | 0.8002 | 0.8626 | 0.0523 |
| LSM5      | 0.6835 | 1.2264 | 0.9167 | 0.6239 | 0.8627 | 0.1367 |
| SFT2D2    | 0.7642 | 1.0138 | 0.8971 | 0.7756 | 0.8627 | 0.0587 |
| NDUFA12   | 0.7605 | 1.1273 | 0.9179 | 0.6450 | 0.8627 | 0.1044 |
| LOC648682 | 0.7847 | 1.0921 | 0.8460 | 0.7280 | 0.8627 | 0.0802 |
| GOLGA5    | 0.7251 | 1.0936 | 0.9210 | 0.7112 | 0.8627 | 0.0906 |
| GLRX2     | 0.7316 | 1.1090 | 0.9782 | 0.6323 | 0.8628 | 0.1097 |
| KBTD2     | 0.7068 | 1.3124 | 0.7330 | 0.6991 | 0.8628 | 0.1500 |
| SBNO1     | 0.7578 | 0.8803 | 0.9531 | 0.8601 | 0.8628 | 0.0403 |
| POLR2L    | 0.7222 | 1.0902 | 0.9073 | 0.7317 | 0.8629 | 0.0869 |

|            |        |        |        |        |        |        |
|------------|--------|--------|--------|--------|--------|--------|
| HSPA9      | 0.6852 | 1.2161 | 0.8439 | 0.7065 | 0.8629 | 0.1229 |
| SNTB2      | 0.6017 | 1.3559 | 0.9001 | 0.5939 | 0.8629 | 0.1791 |
| GPR89B     | 0.6083 | 1.1305 | 0.9818 | 0.7313 | 0.8630 | 0.1183 |
| PIGA       | 0.7725 | 1.0721 | 0.8889 | 0.7185 | 0.8630 | 0.0782 |
| DUSP9      | 0.8393 | 0.9035 | 0.9096 | 0.7998 | 0.8631 | 0.0264 |
| HGSNAT     | 0.7372 | 1.0650 | 0.9170 | 0.7333 | 0.8631 | 0.0798 |
| MED9       | 0.8396 | 0.9455 | 1.0290 | 0.6384 | 0.8631 | 0.0843 |
| UBXN1      | 0.6926 | 1.2659 | 0.8439 | 0.6505 | 0.8632 | 0.1405 |
| SAP30      | 0.7772 | 0.9165 | 0.9996 | 0.7597 | 0.8632 | 0.0574 |
| GPR19      | 0.8189 | 0.9642 | 0.8388 | 0.8311 | 0.8632 | 0.0339 |
| MGC12982   | 0.8071 | 0.8998 | 0.9391 | 0.8070 | 0.8633 | 0.0334 |
| MAN2A1     | 0.7559 | 0.9384 | 0.9481 | 0.8108 | 0.8633 | 0.0476 |
| AURKAIP1   | 0.7830 | 1.1349 | 0.9241 | 0.6111 | 0.8633 | 0.1109 |
| TCEA1      | 0.6822 | 1.0888 | 0.9883 | 0.6939 | 0.8633 | 0.1033 |
| TRAM1      | 0.6976 | 1.1220 | 0.9299 | 0.7037 | 0.8633 | 0.1018 |
| MRPS36     | 0.8046 | 1.0375 | 0.8677 | 0.7436 | 0.8634 | 0.0633 |
| NDUFB7     | 0.7166 | 1.2202 | 0.8866 | 0.6301 | 0.8634 | 0.1303 |
| TTC26      | 0.8044 | 0.9889 | 0.9592 | 0.7009 | 0.8634 | 0.0676 |
| LOC1001309 | 0.7823 | 0.9371 | 1.0322 | 0.7020 | 0.8634 | 0.0745 |
| SAMD11     | 0.8340 | 0.9485 | 0.9326 | 0.7386 | 0.8634 | 0.0487 |
| SUB1       | 0.7478 | 1.0478 | 1.0265 | 0.6317 | 0.8634 | 0.1032 |
| SEC24B     | 0.8151 | 1.0140 | 0.9170 | 0.7077 | 0.8635 | 0.0659 |
| LOC1001288 | 0.6868 | 1.0844 | 0.8978 | 0.7849 | 0.8635 | 0.0853 |
| CHCHD10    | 0.8203 | 1.1767 | 0.7736 | 0.6837 | 0.8636 | 0.1082 |
| NME7       | 0.7068 | 1.1377 | 0.9351 | 0.6747 | 0.8636 | 0.1082 |
| ABT1       | 0.8769 | 1.0023 | 0.7398 | 0.8354 | 0.8636 | 0.0544 |
| FAM184A    | 0.8405 | 1.0000 | 0.7998 | 0.8141 | 0.8636 | 0.0462 |
| LOC1001446 | 0.8973 | 1.0025 | 0.9770 | 0.5777 | 0.8636 | 0.0979 |
| SNORA22    | 0.6725 | 1.0291 | 1.0013 | 0.7517 | 0.8637 | 0.0892 |
| RRP8       | 0.7007 | 1.2121 | 0.9114 | 0.6307 | 0.8637 | 0.1306 |
| DPY19L4    | 0.7040 | 1.0276 | 0.9377 | 0.7857 | 0.8637 | 0.0730 |
| CAND1      | 0.6639 | 1.0474 | 1.0608 | 0.6830 | 0.8638 | 0.1100 |
| NUAK1      | 0.7528 | 1.0533 | 0.8950 | 0.7543 | 0.8639 | 0.0714 |
| EIF4G2     | 0.7151 | 1.0854 | 0.9863 | 0.6686 | 0.8639 | 0.1018 |
| TNPO1      | 0.6740 | 1.0941 | 0.9425 | 0.7449 | 0.8639 | 0.0955 |
| DNAJC3     | 0.7878 | 0.9969 | 0.9276 | 0.7435 | 0.8640 | 0.0592 |
| MAT2B      | 0.7500 | 1.0479 | 0.9122 | 0.7458 | 0.8640 | 0.0725 |
| MKRN2      | 0.7722 | 1.1565 | 0.7756 | 0.7517 | 0.8640 | 0.0976 |
| RSRC2      | 0.7801 | 1.1453 | 0.8575 | 0.6733 | 0.8641 | 0.1011 |
| FAHD2B     | 0.7503 | 1.1571 | 0.9087 | 0.6403 | 0.8641 | 0.1121 |
| LOC729992  | 0.6502 | 1.2620 | 0.8783 | 0.6661 | 0.8641 | 0.1424 |
| PROK1      | 0.8097 | 0.9320 | 0.9927 | 0.7222 | 0.8641 | 0.0607 |
| TMEM39B    | 0.7825 | 1.0756 | 0.9484 | 0.6503 | 0.8642 | 0.0932 |
| LOC651511  | 0.7277 | 0.9627 | 0.9877 | 0.7790 | 0.8643 | 0.0651 |
| ADPGK      | 0.8096 | 1.1108 | 0.8310 | 0.7058 | 0.8643 | 0.0866 |
| TRMT1      | 0.6778 | 1.2913 | 0.7962 | 0.6920 | 0.8643 | 0.1447 |

|            |        |        |        |        |        |        |
|------------|--------|--------|--------|--------|--------|--------|
| LOC1001292 | 0.9501 | 0.8739 | 0.8122 | 0.8213 | 0.8644 | 0.0317 |
| C21orf55   | 0.7082 | 1.1550 | 1.0149 | 0.5794 | 0.8644 | 0.1331 |
| ZNF146     | 0.8522 | 0.9782 | 0.9377 | 0.6896 | 0.8644 | 0.0639 |
| LOC1001338 | 0.6240 | 1.3303 | 0.6998 | 0.8037 | 0.8644 | 0.1596 |
| CCDC49     | 0.6709 | 1.1092 | 0.9065 | 0.7714 | 0.8645 | 0.0948 |
| TST        | 0.7111 | 1.1501 | 0.9162 | 0.6804 | 0.8645 | 0.1086 |
| LOC727825  | 0.7534 | 0.9744 | 1.0321 | 0.6981 | 0.8645 | 0.0818 |
| UBE4B      | 0.7393 | 1.1507 | 0.8667 | 0.7014 | 0.8645 | 0.1017 |
| AP1M1      | 0.8326 | 1.0603 | 0.9613 | 0.6041 | 0.8646 | 0.0985 |
| SH3BP4     | 0.8762 | 1.0837 | 0.7288 | 0.7696 | 0.8646 | 0.0794 |
| SLC25A12   | 0.8136 | 0.9788 | 0.8840 | 0.7821 | 0.8646 | 0.0436 |
| AURKAPS1   | 0.8691 | 0.9655 | 0.7977 | 0.8262 | 0.8646 | 0.0367 |
| KIAA0753   | 0.9403 | 0.8605 | 0.8399 | 0.8178 | 0.8646 | 0.0267 |
| DUXAP3     | 0.6911 | 1.1025 | 0.9181 | 0.7469 | 0.8647 | 0.0928 |
| LOC652190  | 0.8756 | 0.9669 | 0.9438 | 0.6725 | 0.8647 | 0.0669 |
| NUBP2      | 0.8180 | 1.0455 | 0.8760 | 0.7193 | 0.8647 | 0.0684 |
| CRK        | 0.7636 | 1.2273 | 0.7775 | 0.6905 | 0.8647 | 0.1224 |
| XKR8       | 0.8522 | 0.9192 | 0.9282 | 0.7595 | 0.8648 | 0.0390 |
| LMOD3      | 0.8004 | 1.1486 | 0.8528 | 0.6574 | 0.8648 | 0.1032 |
| C14orf166  | 0.6904 | 1.0450 | 1.1267 | 0.5973 | 0.8649 | 0.1301 |
| LOC646531  | 0.6101 | 1.1620 | 0.9895 | 0.6980 | 0.8649 | 0.1280 |
| LOC728188  | 0.5465 | 1.3646 | 0.8582 | 0.6903 | 0.8649 | 0.1783 |
| CFL2       | 0.7623 | 0.9631 | 0.8968 | 0.8375 | 0.8649 | 0.0427 |
| EXOSC7     | 0.7677 | 1.1096 | 0.8630 | 0.7201 | 0.8651 | 0.0867 |
| TGFBRAP1   | 0.7995 | 0.9945 | 0.7608 | 0.9055 | 0.8651 | 0.0529 |
| LOC728715  | 0.7881 | 0.9996 | 0.8356 | 0.8370 | 0.8651 | 0.0463 |
| PDF        | 0.7763 | 0.9734 | 0.9393 | 0.7714 | 0.8651 | 0.0532 |
| FAM49B     | 0.8689 | 0.9170 | 1.0102 | 0.6644 | 0.8651 | 0.0730 |
| VPS24      | 0.6768 | 1.0851 | 1.0089 | 0.6897 | 0.8651 | 0.1062 |
| LOC1001278 | 0.8834 | 1.0782 | 0.8167 | 0.6823 | 0.8651 | 0.0824 |
| PPP2R2A    | 0.6949 | 1.0955 | 0.8585 | 0.8118 | 0.8652 | 0.0841 |
| PATL1      | 0.7632 | 1.2116 | 0.8018 | 0.6842 | 0.8652 | 0.1180 |
| NUDT16P    | 0.7295 | 1.0548 | 0.9167 | 0.7598 | 0.8652 | 0.0754 |
| STAG3L1    | 0.7372 | 1.1304 | 0.8546 | 0.7386 | 0.8652 | 0.0926 |
| ZC3H12C    | 0.8190 | 0.9962 | 0.9414 | 0.7044 | 0.8652 | 0.0652 |
| LOC392301  | 0.8382 | 0.7842 | 0.9494 | 0.8891 | 0.8653 | 0.0353 |
| TBC1D2B    | 0.9111 | 0.9637 | 0.7878 | 0.7991 | 0.8654 | 0.0430 |
| PDIK1L     | 0.7646 | 1.1128 | 0.8899 | 0.6946 | 0.8655 | 0.0918 |
| C1orf25    | 0.8387 | 1.0845 | 0.8388 | 0.6999 | 0.8655 | 0.0800 |
| LRP5L      | 0.8132 | 1.0716 | 0.7939 | 0.7832 | 0.8655 | 0.0690 |
| CYBASC3    | 0.7136 | 1.1501 | 0.9037 | 0.6946 | 0.8655 | 0.1060 |
| CUL4A      | 0.6781 | 1.2343 | 0.9174 | 0.6324 | 0.8656 | 0.1379 |
| LOC1001280 | 0.7091 | 1.2021 | 0.9200 | 0.6310 | 0.8656 | 0.1277 |
| LOC441241  | 0.6734 | 1.1844 | 0.8940 | 0.7105 | 0.8656 | 0.1167 |
| HIAT1      | 0.7871 | 1.1172 | 0.8471 | 0.7110 | 0.8656 | 0.0884 |
| RNF216L    | 0.8297 | 0.9787 | 0.8503 | 0.8038 | 0.8656 | 0.0389 |



|           |        |        |        |        |        |        |
|-----------|--------|--------|--------|--------|--------|--------|
| NRG4      | 0.7050 | 1.2040 | 0.8208 | 0.7328 | 0.8656 | 0.1155 |
| ABCB7     | 0.6714 | 1.1064 | 1.0296 | 0.6555 | 0.8657 | 0.1179 |
| ZNF285A   | 0.7314 | 1.0302 | 0.8619 | 0.8396 | 0.8658 | 0.0618 |
| ECHDC2    | 0.6751 | 1.2468 | 0.8476 | 0.6939 | 0.8659 | 0.1327 |
| HRK       | 0.8230 | 0.9269 | 0.8956 | 0.8183 | 0.8659 | 0.0269 |
| BRD7      | 0.7997 | 1.1040 | 0.8707 | 0.6893 | 0.8659 | 0.0877 |
| OCIAD1    | 0.6524 | 1.2700 | 0.9054 | 0.6359 | 0.8659 | 0.1482 |
| MMADHC    | 0.7556 | 1.0314 | 1.0727 | 0.6041 | 0.8659 | 0.1121 |
| LOC654085 | 0.8199 | 0.9959 | 0.9312 | 0.7169 | 0.8660 | 0.0616 |
| ENTPD3    | 0.7135 | 1.2020 | 0.9124 | 0.6363 | 0.8661 | 0.1262 |
| LOC653589 | 0.7121 | 0.9504 | 0.9822 | 0.8201 | 0.8662 | 0.0622 |
| SUZ12     | 0.6938 | 1.1109 | 0.9486 | 0.7116 | 0.8662 | 0.1001 |
| DEF8      | 0.7535 | 1.1671 | 0.8549 | 0.6900 | 0.8664 | 0.1058 |
| POT1      | 0.7572 | 1.1114 | 0.8948 | 0.7021 | 0.8664 | 0.0912 |
| DIAPH1    | 0.8090 | 1.1114 | 0.8758 | 0.6695 | 0.8664 | 0.0923 |
| TTC25     | 0.8510 | 0.8898 | 0.9054 | 0.8197 | 0.8665 | 0.0193 |
| BAK1      | 0.8211 | 1.0772 | 0.7993 | 0.7684 | 0.8665 | 0.0711 |
| FIZ1      | 0.8565 | 1.1300 | 0.7764 | 0.7032 | 0.8665 | 0.0932 |
| DUS2L     | 0.8314 | 0.9727 | 0.7873 | 0.8749 | 0.8666 | 0.0396 |
| DDX17     | 0.7502 | 1.0696 | 0.8947 | 0.7520 | 0.8666 | 0.0757 |
| ZFP82     | 0.7562 | 1.1386 | 0.8498 | 0.7223 | 0.8667 | 0.0945 |
| GNPDA1    | 0.7330 | 1.1912 | 0.9370 | 0.6058 | 0.8668 | 0.1278 |
| ABLIM1    | 0.6850 | 1.2278 | 0.8296 | 0.7247 | 0.8668 | 0.1241 |
| LHFPL2    | 0.7620 | 1.0965 | 0.8747 | 0.7340 | 0.8668 | 0.0824 |
| CTPS2     | 0.7961 | 1.0045 | 0.8478 | 0.8189 | 0.8668 | 0.0471 |
| LOC147804 | 0.6945 | 1.1992 | 0.8829 | 0.6907 | 0.8668 | 0.1195 |
| RUSC1     | 0.8676 | 1.1139 | 0.7785 | 0.7075 | 0.8669 | 0.0886 |
| LRRC47    | 0.6600 | 1.1769 | 0.9622 | 0.6686 | 0.8669 | 0.1249 |
| MRE11A    | 0.7580 | 1.0451 | 0.8688 | 0.7961 | 0.8670 | 0.0637 |
| PDCD10    | 0.6820 | 1.0505 | 1.0626 | 0.6730 | 0.8670 | 0.1095 |
| PPFIA1    | 0.7779 | 1.0757 | 0.9147 | 0.6998 | 0.8670 | 0.0825 |
| SKP1      | 0.8025 | 1.1254 | 0.8548 | 0.6855 | 0.8670 | 0.0931 |
| DCAF8L1   | 0.7686 | 0.9017 | 0.9935 | 0.8045 | 0.8671 | 0.0507 |
| RAPH1     | 0.7926 | 0.9944 | 0.8528 | 0.8286 | 0.8671 | 0.0442 |
| STUB1     | 0.8709 | 1.0821 | 0.8304 | 0.6852 | 0.8671 | 0.0820 |
| RBM10     | 0.8041 | 1.0630 | 0.8394 | 0.7621 | 0.8671 | 0.0672 |
| HNRNPK    | 0.6457 | 1.2815 | 0.8520 | 0.6894 | 0.8672 | 0.1451 |
| KIAA0368  | 0.8548 | 1.0886 | 0.9002 | 0.6252 | 0.8672 | 0.0952 |
| LRDD      | 0.8034 | 1.0049 | 0.8354 | 0.8255 | 0.8673 | 0.0464 |
| RNF44     | 0.8491 | 1.0861 | 0.7578 | 0.7764 | 0.8674 | 0.0755 |
| ATG3      | 0.7894 | 1.3072 | 0.8385 | 0.5345 | 0.8674 | 0.1610 |
| FAM62B    | 0.8548 | 1.1227 | 0.7547 | 0.7376 | 0.8674 | 0.0889 |
| C6orf129  | 0.7111 | 1.1915 | 0.8510 | 0.7164 | 0.8675 | 0.1127 |
| LOC653375 | 0.7818 | 1.1426 | 0.8225 | 0.7232 | 0.8675 | 0.0939 |
| TOR1B     | 0.7243 | 1.2090 | 0.8827 | 0.6543 | 0.8676 | 0.1234 |
| WDR51B    | 0.7683 | 1.0689 | 0.8776 | 0.7555 | 0.8676 | 0.0725 |

|            |        |        |        |        |        |        |
|------------|--------|--------|--------|--------|--------|--------|
| TATDN1     | 0.7667 | 1.0733 | 0.9829 | 0.6476 | 0.8676 | 0.0975 |
| SNORD104   | 0.6445 | 1.1985 | 0.9525 | 0.6749 | 0.8676 | 0.1303 |
| LOC728193  | 0.9353 | 0.8871 | 0.8765 | 0.7716 | 0.8676 | 0.0345 |
| SP2        | 0.8241 | 1.1379 | 0.7578 | 0.7512 | 0.8677 | 0.0916 |
| UBE3C      | 0.7587 | 1.2719 | 0.7260 | 0.7145 | 0.8678 | 0.1350 |
| C14orf43   | 0.8611 | 1.0534 | 0.8246 | 0.7320 | 0.8678 | 0.0676 |
| LOC653497  | 0.8155 | 0.9980 | 0.8985 | 0.7594 | 0.8679 | 0.0520 |
| dJ222E13.2 | 0.8155 | 0.9428 | 0.8736 | 0.8396 | 0.8679 | 0.0277 |
| FAR1       | 0.8167 | 1.1149 | 0.7683 | 0.7717 | 0.8679 | 0.0831 |
| ITPRIP     | 0.7777 | 0.9947 | 0.9055 | 0.7939 | 0.8680 | 0.0509 |
| LOC1001339 | 0.8707 | 1.0413 | 0.8862 | 0.6737 | 0.8680 | 0.0753 |
| VTI1B      | 0.7279 | 0.9889 | 1.0167 | 0.7386 | 0.8680 | 0.0781 |
| UBE2W      | 0.6986 | 1.1278 | 0.9213 | 0.7243 | 0.8680 | 0.0999 |
| GP1BA      | 0.7326 | 1.0904 | 0.9297 | 0.7195 | 0.8680 | 0.0884 |
| INPP5J     | 0.8616 | 0.9004 | 0.9225 | 0.7876 | 0.8680 | 0.0296 |
| POTEF      | 0.8299 | 1.0695 | 0.8757 | 0.6973 | 0.8681 | 0.0771 |
| LOC1001317 | 0.7564 | 1.0812 | 0.8477 | 0.7870 | 0.8681 | 0.0735 |
| PIM2       | 0.7539 | 1.1816 | 0.7782 | 0.7588 | 0.8681 | 0.1046 |
| FLYWCH2    | 0.6764 | 1.2590 | 0.8700 | 0.6672 | 0.8681 | 0.1384 |
| RNU105A    | 0.7017 | 1.1023 | 0.8763 | 0.7924 | 0.8682 | 0.0858 |
| KIAA0562   | 0.9538 | 0.9857 | 0.8016 | 0.7320 | 0.8683 | 0.0607 |
| ABHD7      | 0.6773 | 1.1883 | 0.8955 | 0.7121 | 0.8683 | 0.1169 |
| TCEAL3     | 0.6993 | 1.2191 | 0.8650 | 0.6900 | 0.8683 | 0.1236 |
| MRPS11     | 0.7590 | 1.2167 | 0.8546 | 0.6430 | 0.8683 | 0.1239 |
| GPSM1      | 0.7644 | 1.2079 | 0.7716 | 0.7294 | 0.8683 | 0.1136 |
| LOC645175  | 0.7560 | 0.9545 | 0.9677 | 0.7950 | 0.8683 | 0.0542 |
| TWSG1      | 0.7222 | 1.1456 | 0.9572 | 0.6483 | 0.8683 | 0.1135 |
| FBXO4      | 0.7049 | 1.0476 | 0.9586 | 0.7623 | 0.8684 | 0.0807 |
| MRPL28     | 0.5903 | 1.2919 | 0.8983 | 0.6928 | 0.8684 | 0.1550 |
| CDKN2D     | 0.8312 | 0.9900 | 0.9125 | 0.7399 | 0.8684 | 0.0537 |
| DNPEP      | 0.8124 | 1.0583 | 0.7572 | 0.8457 | 0.8684 | 0.0659 |
| IQGAP3     | 0.8170 | 0.9997 | 0.8922 | 0.7648 | 0.8684 | 0.0510 |
| SMPD4      | 0.6964 | 1.1309 | 0.7851 | 0.8613 | 0.8684 | 0.0938 |
| B3GNT4     | 0.8304 | 0.9717 | 0.9215 | 0.7502 | 0.8684 | 0.0491 |
| IFT81      | 0.8459 | 0.9549 | 0.8909 | 0.7823 | 0.8685 | 0.0364 |
| S100P      | 0.8482 | 0.9182 | 0.8872 | 0.8204 | 0.8685 | 0.0215 |
| INF2       | 0.8014 | 1.0666 | 0.8439 | 0.7620 | 0.8685 | 0.0681 |
| XAGE1B     | 0.7725 | 1.0629 | 0.9232 | 0.7154 | 0.8685 | 0.0782 |
| FRG1       | 0.7076 | 1.0033 | 1.0965 | 0.6667 | 0.8685 | 0.1067 |
| FKBP9L     | 0.8499 | 1.0749 | 0.8265 | 0.7229 | 0.8685 | 0.0741 |
| MCPH1      | 0.7848 | 1.0236 | 0.8817 | 0.7842 | 0.8686 | 0.0565 |
| SCP2       | 0.6352 | 1.2326 | 0.9022 | 0.7043 | 0.8686 | 0.1339 |
| ZNF700     | 0.8062 | 1.0727 | 0.8479 | 0.7478 | 0.8686 | 0.0711 |
| LOC441086  | 0.7487 | 0.9753 | 0.9307 | 0.8198 | 0.8687 | 0.0516 |
| CXorf57    | 0.7187 | 1.1362 | 0.8564 | 0.7633 | 0.8687 | 0.0937 |
| TLE2       | 0.8620 | 0.9931 | 0.7932 | 0.8266 | 0.8687 | 0.0438 |

|            |        |        |        |        |        |        |
|------------|--------|--------|--------|--------|--------|--------|
| LYRM4      | 0.7220 | 1.1195 | 0.9239 | 0.7096 | 0.8688 | 0.0970 |
| SNRNP27    | 0.6680 | 1.1488 | 0.9716 | 0.6867 | 0.8688 | 0.1164 |
| ZSWIM1     | 0.7519 | 1.0679 | 0.8878 | 0.7680 | 0.8689 | 0.0729 |
| UTS2R      | 0.8862 | 0.7827 | 0.9521 | 0.8549 | 0.8690 | 0.0352 |
| C17orf97   | 0.7761 | 1.2180 | 0.7829 | 0.6987 | 0.8690 | 0.1179 |
| PPCS       | 0.7072 | 1.0212 | 1.0460 | 0.7017 | 0.8690 | 0.0952 |
| CNPY2      | 0.7238 | 1.2769 | 0.8243 | 0.6513 | 0.8691 | 0.1405 |
| TIMM17B    | 0.7074 | 1.0857 | 0.9329 | 0.7504 | 0.8691 | 0.0872 |
| USP39      | 0.8115 | 1.1067 | 0.8231 | 0.7351 | 0.8691 | 0.0816 |
| HSP90AA1   | 0.6702 | 1.1464 | 1.0103 | 0.6497 | 0.8692 | 0.1240 |
| SNORA45    | 0.7566 | 1.0026 | 0.9163 | 0.8014 | 0.8692 | 0.0557 |
| GSR        | 0.8053 | 1.2559 | 0.7342 | 0.6817 | 0.8693 | 0.1313 |
| C5orf21    | 0.7462 | 1.1090 | 0.8307 | 0.7915 | 0.8693 | 0.0817 |
| ARHGAP17   | 0.7691 | 1.0466 | 0.8395 | 0.8224 | 0.8694 | 0.0609 |
| C9orf6     | 0.7608 | 1.1261 | 0.9354 | 0.6555 | 0.8694 | 0.1032 |
| ZNF561     | 0.8920 | 1.0053 | 0.8839 | 0.6967 | 0.8695 | 0.0639 |
| SNORA73B   | 0.6954 | 0.9747 | 0.9162 | 0.8922 | 0.8696 | 0.0606 |
| NCK1       | 0.8025 | 1.0983 | 0.9625 | 0.6155 | 0.8697 | 0.1041 |
| ADORA2A    | 0.9509 | 0.9335 | 0.8247 | 0.7700 | 0.8698 | 0.0434 |
| CHD4       | 0.7007 | 1.1641 | 0.8617 | 0.7527 | 0.8698 | 0.1037 |
| LOC1001325 | 0.7579 | 1.0567 | 0.9116 | 0.7532 | 0.8699 | 0.0723 |
| P8         | 0.9021 | 1.0641 | 0.7703 | 0.7431 | 0.8699 | 0.0735 |
| SDHB       | 0.6469 | 1.1587 | 0.9503 | 0.7238 | 0.8699 | 0.1158 |
| USP33      | 0.7004 | 1.1624 | 0.9280 | 0.6889 | 0.8699 | 0.1120 |
| LOC285412  | 0.7591 | 1.0703 | 0.8793 | 0.7709 | 0.8699 | 0.0720 |
| LOC1001317 | 0.7491 | 1.1211 | 0.8129 | 0.7966 | 0.8699 | 0.0848 |
| LOC650832  | 0.7738 | 1.2663 | 0.7963 | 0.6434 | 0.8700 | 0.1363 |
| FLJ20254   | 0.7306 | 1.1404 | 0.8892 | 0.7204 | 0.8701 | 0.0980 |
| DOPEY2     | 0.8699 | 1.0901 | 0.7860 | 0.7346 | 0.8701 | 0.0784 |
| SS18L1     | 0.7490 | 1.1095 | 0.8083 | 0.8138 | 0.8702 | 0.0811 |
| LZIC       | 0.7599 | 1.1427 | 0.8863 | 0.6918 | 0.8702 | 0.0994 |
| ARPC3      | 0.8109 | 1.0195 | 0.9425 | 0.7078 | 0.8702 | 0.0692 |
| IMP3       | 0.6961 | 1.1226 | 0.9611 | 0.7009 | 0.8702 | 0.1045 |
| ALG2       | 0.8481 | 1.0213 | 0.8947 | 0.7168 | 0.8702 | 0.0629 |
| CXXC5      | 0.8726 | 1.0601 | 0.8457 | 0.7025 | 0.8702 | 0.0735 |
| LOC728352  | 0.7810 | 0.9576 | 0.8752 | 0.8672 | 0.8702 | 0.0361 |
| NDUFS5     | 0.7670 | 1.0790 | 0.9424 | 0.6926 | 0.8703 | 0.0871 |
| LOC727950  | 0.8263 | 1.0472 | 0.9040 | 0.7036 | 0.8703 | 0.0720 |
| CWF19L2    | 0.7169 | 1.0671 | 0.9505 | 0.7466 | 0.8703 | 0.0837 |
| FAM134A    | 0.7857 | 0.9923 | 0.8937 | 0.8095 | 0.8703 | 0.0468 |
| OSBPL3     | 0.7794 | 0.9258 | 0.9131 | 0.8629 | 0.8703 | 0.0332 |
| C15orf24   | 0.8163 | 1.1497 | 0.9138 | 0.6016 | 0.8703 | 0.1137 |
| KIAA1012   | 0.7042 | 1.1446 | 0.9122 | 0.7203 | 0.8703 | 0.1029 |
| RBM26      | 0.7117 | 1.0498 | 1.0022 | 0.7177 | 0.8704 | 0.0904 |
| LOC1001341 | 0.6878 | 1.1160 | 0.9825 | 0.6953 | 0.8704 | 0.1068 |
| TMUB2      | 0.7642 | 1.0868 | 0.8721 | 0.7585 | 0.8704 | 0.0767 |

|            |        |        |        |        |        |        |
|------------|--------|--------|--------|--------|--------|--------|
| CDC34      | 0.7313 | 1.1707 | 0.8657 | 0.7141 | 0.8704 | 0.1057 |
| LOC1001342 | 0.7619 | 0.9183 | 0.9024 | 0.8992 | 0.8704 | 0.0364 |
| C8ORFK29   | 0.8899 | 0.9356 | 0.9047 | 0.7516 | 0.8704 | 0.0407 |
| GMEB1      | 0.7581 | 1.0556 | 0.8731 | 0.7952 | 0.8705 | 0.0662 |
| LOC729340  | 0.6697 | 0.9909 | 1.2044 | 0.6171 | 0.8705 | 0.1386 |
| ZNF714     | 0.7639 | 1.0846 | 0.8144 | 0.8195 | 0.8706 | 0.0724 |
| KRT18      | 0.7266 | 1.1184 | 0.9269 | 0.7106 | 0.8706 | 0.0961 |
| KATNA1     | 0.6900 | 1.1601 | 0.8495 | 0.7835 | 0.8708 | 0.1018 |
| TGIF2      | 0.7800 | 1.1721 | 0.7958 | 0.7352 | 0.8708 | 0.1013 |
| ACLY       | 0.7858 | 1.1517 | 0.9186 | 0.6274 | 0.8709 | 0.1109 |
| CCRK       | 0.7496 | 1.2083 | 0.7985 | 0.7271 | 0.8709 | 0.1134 |
| THRAP5     | 0.7707 | 0.9652 | 0.9682 | 0.7797 | 0.8709 | 0.0553 |
| ING2       | 0.7964 | 1.0587 | 0.8394 | 0.7893 | 0.8709 | 0.0636 |
| LOC644617  | 0.8317 | 1.0038 | 0.8817 | 0.7668 | 0.8710 | 0.0501 |
| PIGP       | 0.7250 | 1.0978 | 0.9634 | 0.6978 | 0.8710 | 0.0963 |
| FLJ10081   | 0.7829 | 1.0962 | 0.8946 | 0.7106 | 0.8711 | 0.0840 |
| LAPTM4B    | 0.7005 | 1.2063 | 0.8305 | 0.7472 | 0.8711 | 0.1149 |
| LOC401238  | 0.7432 | 1.2127 | 0.8472 | 0.6817 | 0.8712 | 0.1188 |
| TIAF1      | 0.8302 | 1.0815 | 0.8355 | 0.7376 | 0.8712 | 0.0736 |
| FAM24B     | 0.7681 | 1.0589 | 0.8494 | 0.8088 | 0.8713 | 0.0647 |
| LOC644936  | 0.8519 | 0.9593 | 0.9370 | 0.7371 | 0.8713 | 0.0504 |
| LOC653524  | 0.6805 | 1.1239 | 0.8241 | 0.8569 | 0.8713 | 0.0925 |
| WBP11      | 0.6917 | 1.1027 | 0.9495 | 0.7418 | 0.8714 | 0.0952 |
| DCST1      | 0.7901 | 0.9005 | 0.9938 | 0.8014 | 0.8714 | 0.0477 |
| C8orf40    | 0.7282 | 1.3929 | 0.8472 | 0.5175 | 0.8715 | 0.1867 |
| CCDC21     | 0.7213 | 1.0698 | 0.9424 | 0.7524 | 0.8715 | 0.0822 |
| PPP1CA     | 0.9125 | 1.1053 | 0.7638 | 0.7044 | 0.8715 | 0.0894 |
| ANKRD10    | 0.7963 | 0.9709 | 0.9374 | 0.7817 | 0.8716 | 0.0482 |
| NT5C       | 0.7849 | 1.0900 | 0.9724 | 0.6392 | 0.8716 | 0.0998 |
| LOC1001319 | 0.8487 | 0.7869 | 0.9671 | 0.8839 | 0.8717 | 0.0376 |
| RRAS2      | 0.6252 | 1.2169 | 0.9881 | 0.6566 | 0.8717 | 0.1414 |
| CCDC111    | 0.8224 | 1.0075 | 0.8707 | 0.7863 | 0.8717 | 0.0485 |
| SIAH1      | 0.6488 | 1.1334 | 0.8833 | 0.8214 | 0.8717 | 0.1004 |
| ATP8B2     | 0.7559 | 1.0984 | 0.8509 | 0.7817 | 0.8717 | 0.0782 |
| UBFD1      | 0.6404 | 1.1041 | 0.9947 | 0.7477 | 0.8718 | 0.1072 |
| ECGF1      | 0.7090 | 1.3189 | 0.8556 | 0.6035 | 0.8718 | 0.1577 |
| MNT        | 0.7238 | 1.2147 | 0.7840 | 0.7647 | 0.8718 | 0.1150 |
| LOC1001337 | 0.8553 | 1.2733 | 0.7809 | 0.5776 | 0.8718 | 0.1461 |
| WNT5A      | 0.7891 | 0.9414 | 0.9099 | 0.8468 | 0.8718 | 0.0339 |
| LOC1001308 | 0.7379 | 1.1811 | 0.8886 | 0.6798 | 0.8719 | 0.1121 |
| AMDHD2     | 0.7723 | 0.9550 | 0.9191 | 0.8410 | 0.8719 | 0.0408 |
| C15orf34   | 0.9643 | 0.8071 | 0.8097 | 0.9068 | 0.8720 | 0.0386 |
| ASB13      | 0.7396 | 1.2712 | 0.7901 | 0.6872 | 0.8720 | 0.1347 |
| FUT11      | 0.7179 | 1.0137 | 0.8956 | 0.8612 | 0.8721 | 0.0609 |
| HEATR3     | 0.6599 | 1.1315 | 0.9748 | 0.7222 | 0.8721 | 0.1100 |
| NAT8L      | 0.7512 | 1.1491 | 0.8321 | 0.7560 | 0.8721 | 0.0942 |

|            |        |        |        |        |        |        |
|------------|--------|--------|--------|--------|--------|--------|
| F8         | 0.7734 | 1.0395 | 0.9006 | 0.7752 | 0.8722 | 0.0632 |
| LOC645236  | 0.8097 | 0.9524 | 0.9651 | 0.7616 | 0.8722 | 0.0510 |
| TOMM20     | 0.7220 | 1.2438 | 0.8843 | 0.6391 | 0.8723 | 0.1339 |
| PIM3       | 0.8037 | 1.0228 | 0.8937 | 0.7689 | 0.8723 | 0.0566 |
| ZIC1       | 0.8189 | 0.7931 | 0.9565 | 0.9209 | 0.8723 | 0.0393 |
| PCNT       | 0.7983 | 1.2068 | 0.7206 | 0.7636 | 0.8723 | 0.1126 |
| TMEM203    | 0.7287 | 1.1864 | 0.8346 | 0.7399 | 0.8724 | 0.1073 |
| ZSCAN16    | 0.8510 | 0.9950 | 0.9254 | 0.7183 | 0.8724 | 0.0592 |
| USP8       | 0.8607 | 0.9413 | 0.9346 | 0.7531 | 0.8724 | 0.0438 |
| COBRA1     | 0.8432 | 1.0855 | 0.8245 | 0.7369 | 0.8725 | 0.0747 |
| CENTG3     | 0.7799 | 1.1731 | 0.8641 | 0.6730 | 0.8725 | 0.1075 |
| TBCEL      | 0.7601 | 1.0660 | 0.8926 | 0.7715 | 0.8725 | 0.0711 |
| DHX30      | 0.7458 | 1.1350 | 0.8305 | 0.7790 | 0.8726 | 0.0892 |
| ITGB7      | 0.8223 | 1.0417 | 0.8655 | 0.7611 | 0.8726 | 0.0603 |
| JMJD6      | 0.7827 | 1.0016 | 0.8602 | 0.8462 | 0.8727 | 0.0462 |
| NDUFV2     | 0.6679 | 1.2246 | 0.9462 | 0.6521 | 0.8727 | 0.1353 |
| EFR3A      | 0.6012 | 1.2216 | 0.9568 | 0.7111 | 0.8727 | 0.1380 |
| PLSCR4     | 0.9125 | 0.8824 | 0.9574 | 0.7385 | 0.8727 | 0.0473 |
| IL13RA1    | 0.8157 | 1.0694 | 0.9271 | 0.6786 | 0.8727 | 0.0830 |
| DIABLO     | 0.7524 | 1.0512 | 0.9271 | 0.7602 | 0.8727 | 0.0719 |
| LOC732165  | 0.7438 | 1.1008 | 1.0074 | 0.6391 | 0.8728 | 0.1085 |
| ARGLU1     | 0.7696 | 1.2141 | 0.8894 | 0.6183 | 0.8728 | 0.1265 |
| PPP6C      | 0.7223 | 1.1458 | 0.9768 | 0.6464 | 0.8728 | 0.1152 |
| MANEA      | 0.6595 | 1.2005 | 0.9942 | 0.6373 | 0.8728 | 0.1363 |
| TESC       | 0.7387 | 1.0932 | 0.9518 | 0.7079 | 0.8729 | 0.0913 |
| PALLD      | 0.7420 | 1.1655 | 0.8149 | 0.7693 | 0.8729 | 0.0987 |
| ZBTB38     | 0.8078 | 1.1566 | 0.8182 | 0.7091 | 0.8729 | 0.0977 |
| CUL2       | 0.6977 | 1.0844 | 0.8241 | 0.8856 | 0.8729 | 0.0806 |
| ZBED3      | 0.8429 | 0.9975 | 0.8410 | 0.8105 | 0.8730 | 0.0422 |
| MYO5A      | 0.7851 | 1.0247 | 0.9195 | 0.7627 | 0.8730 | 0.0613 |
| C9orf169   | 0.9320 | 1.1599 | 0.7522 | 0.6480 | 0.8730 | 0.1122 |
| HINT2      | 0.9100 | 1.0955 | 0.8331 | 0.6535 | 0.8730 | 0.0916 |
| TMEM4      | 0.8171 | 1.0555 | 0.8972 | 0.7225 | 0.8731 | 0.0705 |
| LOC1001293 | 0.7256 | 1.0075 | 0.8925 | 0.8668 | 0.8731 | 0.0579 |
| EGR1       | 0.8723 | 0.9930 | 0.8669 | 0.7604 | 0.8731 | 0.0475 |
| NDUFB8     | 0.7087 | 1.3167 | 0.8571 | 0.6101 | 0.8731 | 0.1563 |
| SNORD109B  | 0.7138 | 0.9056 | 0.9954 | 0.8779 | 0.8731 | 0.0587 |
| FAM76B     | 0.8014 | 1.0204 | 0.8649 | 0.8060 | 0.8732 | 0.0512 |
| LOC440354  | 0.7978 | 1.0086 | 0.8767 | 0.8096 | 0.8732 | 0.0484 |
| THNSL1     | 0.7283 | 1.0862 | 0.9065 | 0.7719 | 0.8732 | 0.0805 |
| PRR14      | 0.7315 | 1.2304 | 0.7946 | 0.7365 | 0.8733 | 0.1199 |
| FLJ41649   | 0.8542 | 0.8952 | 0.8429 | 0.9008 | 0.8733 | 0.0145 |
| LARP1B     | 0.7950 | 1.0131 | 0.9463 | 0.7388 | 0.8733 | 0.0640 |
| AAGAB      | 0.7610 | 1.0995 | 0.9898 | 0.6433 | 0.8734 | 0.1042 |
| LOC654174  | 0.6385 | 1.3260 | 0.8700 | 0.6591 | 0.8734 | 0.1597 |
| C10orf119  | 0.7684 | 1.0063 | 0.8742 | 0.8446 | 0.8734 | 0.0496 |

|            |        |        |        |        |        |        |
|------------|--------|--------|--------|--------|--------|--------|
| INTS4      | 0.7629 | 1.2335 | 0.8035 | 0.6939 | 0.8734 | 0.1221 |
| INTS8      | 0.9298 | 0.8858 | 0.9947 | 0.6834 | 0.8734 | 0.0672 |
| C14orf79   | 0.7334 | 1.2017 | 0.8451 | 0.7135 | 0.8734 | 0.1132 |
| CHMP4A     | 0.8038 | 1.1995 | 0.8659 | 0.6247 | 0.8735 | 0.1201 |
| TMEM51     | 0.7806 | 1.0333 | 0.9122 | 0.7680 | 0.8735 | 0.0624 |
| CHUK       | 0.9265 | 0.9618 | 0.8683 | 0.7375 | 0.8735 | 0.0493 |
| GKAP1      | 0.9020 | 0.8293 | 0.9670 | 0.7958 | 0.8735 | 0.0382 |
| LOC1001335 | 0.6620 | 0.7450 | 1.2255 | 0.8619 | 0.8736 | 0.1243 |
| CENTG2     | 0.7553 | 1.0430 | 0.9272 | 0.7688 | 0.8736 | 0.0686 |
| LOC1001303 | 0.8680 | 0.9551 | 0.8565 | 0.8148 | 0.8736 | 0.0295 |
| LOC727726  | 0.7917 | 1.1510 | 0.8065 | 0.7452 | 0.8736 | 0.0934 |
| WDFY1      | 0.7342 | 1.1658 | 0.8660 | 0.7285 | 0.8736 | 0.1024 |
| FBXO16     | 0.8029 | 1.0845 | 0.8001 | 0.8073 | 0.8737 | 0.0703 |
| GAGE5      | 0.7327 | 1.1275 | 0.9154 | 0.7192 | 0.8737 | 0.0957 |
| IRF3       | 0.7942 | 1.1025 | 0.8825 | 0.7160 | 0.8738 | 0.0835 |
| RAB8A      | 0.6979 | 1.2259 | 0.8407 | 0.7310 | 0.8739 | 0.1212 |
| SNORD36C   | 0.7956 | 1.0030 | 0.9399 | 0.7570 | 0.8739 | 0.0583 |
| HN1        | 0.8383 | 1.0305 | 1.0168 | 0.6099 | 0.8739 | 0.0983 |
| SLC16A3    | 0.7880 | 1.0296 | 0.8731 | 0.8049 | 0.8739 | 0.0551 |
| OSBPL1A    | 0.7191 | 1.1538 | 0.9116 | 0.7112 | 0.8739 | 0.1042 |
| LOC1001324 | 0.8120 | 1.0827 | 0.7937 | 0.8073 | 0.8739 | 0.0697 |
| B4GALT7    | 0.7122 | 1.2479 | 0.8302 | 0.7054 | 0.8740 | 0.1279 |
| LOC652877  | 0.8822 | 0.9283 | 0.8492 | 0.8362 | 0.8740 | 0.0205 |
| ZFP30      | 0.8233 | 0.8488 | 0.9530 | 0.8710 | 0.8740 | 0.0281 |
| TBCCD1     | 0.7938 | 1.0203 | 0.9285 | 0.7536 | 0.8740 | 0.0614 |
| GCN1L1     | 0.5427 | 1.3437 | 0.9340 | 0.6758 | 0.8741 | 0.1764 |
| LOC339352  | 0.7203 | 1.0607 | 0.8982 | 0.8173 | 0.8741 | 0.0720 |
| KIAA1949   | 0.8166 | 1.0227 | 0.8925 | 0.7650 | 0.8742 | 0.0560 |
| METTL6     | 0.7216 | 0.9787 | 1.0068 | 0.7898 | 0.8742 | 0.0701 |
| CCDC42     | 0.7878 | 1.0596 | 0.7827 | 0.8668 | 0.8743 | 0.0647 |
| RABGGTB    | 0.6493 | 1.1338 | 1.0369 | 0.6770 | 0.8743 | 0.1236 |
| UEVLD      | 0.8280 | 0.9806 | 0.9809 | 0.7076 | 0.8743 | 0.0662 |
| LOC440043  | 0.7227 | 1.2012 | 0.8937 | 0.6795 | 0.8743 | 0.1184 |
| TMEM55A    | 0.8950 | 0.9406 | 0.9253 | 0.7363 | 0.8743 | 0.0470 |
| C1orf107   | 0.8018 | 0.9299 | 0.9377 | 0.8280 | 0.8743 | 0.0348 |
| B4GALT4    | 0.8010 | 1.0693 | 0.8885 | 0.7386 | 0.8743 | 0.0719 |
| ACOT1      | 0.8142 | 1.0106 | 1.0260 | 0.6467 | 0.8744 | 0.0899 |
| RAB7L1     | 0.7850 | 1.0519 | 0.9092 | 0.7516 | 0.8744 | 0.0682 |
| ALOXE3     | 0.8201 | 0.9726 | 0.8975 | 0.8076 | 0.8744 | 0.0383 |
| PAG1       | 0.8011 | 1.0663 | 0.8954 | 0.7350 | 0.8744 | 0.0719 |
| PSMB7      | 0.7624 | 1.2091 | 0.8188 | 0.7076 | 0.8745 | 0.1138 |
| SNORD62B   | 0.9636 | 0.8561 | 0.8242 | 0.8541 | 0.8745 | 0.0306 |
| GADD45GIP1 | 0.8858 | 0.9610 | 0.9257 | 0.7256 | 0.8745 | 0.0520 |
| LOC1001323 | 0.7806 | 1.0936 | 0.8882 | 0.7357 | 0.8745 | 0.0797 |
| FAM156B    | 0.7041 | 1.0659 | 0.8785 | 0.8501 | 0.8747 | 0.0743 |
| PREB       | 0.7464 | 1.1395 | 0.8985 | 0.7144 | 0.8747 | 0.0970 |

|            |        |        |        |        |        |        |
|------------|--------|--------|--------|--------|--------|--------|
| UMPS       | 0.7317 | 1.0725 | 0.9567 | 0.7379 | 0.8747 | 0.0842 |
| TTLL7      | 0.7854 | 1.1377 | 0.8249 | 0.7508 | 0.8747 | 0.0890 |
| NUP98      | 0.7712 | 1.0942 | 0.8472 | 0.7862 | 0.8747 | 0.0750 |
| NDUFS8     | 0.6691 | 1.3028 | 0.8308 | 0.6961 | 0.8747 | 0.1470 |
| FAM53A     | 0.8748 | 0.8955 | 0.9564 | 0.7722 | 0.8747 | 0.0383 |
| BEXL1      | 0.8835 | 1.0651 | 0.8689 | 0.6814 | 0.8747 | 0.0784 |
| LOC388654  | 0.5866 | 1.1624 | 1.0946 | 0.6554 | 0.8748 | 0.1478 |
| MED27      | 0.6747 | 1.1492 | 0.9490 | 0.7263 | 0.8748 | 0.1091 |
| LOC1001321 | 0.8121 | 0.9708 | 0.9598 | 0.7568 | 0.8749 | 0.0535 |
| C8orf59    | 0.7492 | 1.1098 | 1.0604 | 0.5803 | 0.8749 | 0.1266 |
| DCLRE1B    | 0.7887 | 0.9246 | 0.9190 | 0.8675 | 0.8750 | 0.0315 |
| LOC645251  | 0.7654 | 0.9805 | 0.9923 | 0.7617 | 0.8750 | 0.0644 |
| LOC645478  | 0.7584 | 1.0534 | 0.8303 | 0.8578 | 0.8750 | 0.0631 |
| EIF2S3     | 0.6297 | 1.2321 | 0.9035 | 0.7345 | 0.8750 | 0.1317 |
| LOC646533  | 0.9282 | 0.8435 | 0.9162 | 0.8121 | 0.8750 | 0.0281 |
| LOC1001313 | 0.8351 | 0.9927 | 0.8844 | 0.7879 | 0.8750 | 0.0439 |
| PXDN       | 0.6871 | 1.0405 | 1.0009 | 0.7716 | 0.8750 | 0.0862 |
| FLJ35024   | 0.8623 | 0.9922 | 0.8781 | 0.7680 | 0.8751 | 0.0460 |
| BAZ1B      | 0.7078 | 1.1870 | 0.8261 | 0.7797 | 0.8751 | 0.1068 |
| DHX16      | 0.7831 | 1.1667 | 0.8506 | 0.7002 | 0.8752 | 0.1019 |
| HS1BP3     | 0.7866 | 1.1601 | 0.8385 | 0.7155 | 0.8752 | 0.0983 |
| MAGT1      | 0.5789 | 1.1953 | 0.9006 | 0.8259 | 0.8752 | 0.1269 |
| LOC1001280 | 0.8030 | 1.0233 | 0.9331 | 0.7414 | 0.8752 | 0.0635 |
| LYRM2      | 0.6557 | 1.0865 | 0.9159 | 0.8430 | 0.8753 | 0.0892 |
| ENY2       | 0.7139 | 1.1267 | 0.9600 | 0.7005 | 0.8753 | 0.1029 |
| LOC402377  | 0.7912 | 0.9303 | 0.9628 | 0.8169 | 0.8753 | 0.0420 |
| MAN1A2     | 0.7940 | 1.0943 | 0.8741 | 0.7387 | 0.8753 | 0.0781 |
| PRKAA1     | 0.7515 | 1.0988 | 1.0287 | 0.6222 | 0.8753 | 0.1129 |
| SERPINE1   | 0.8059 | 1.0081 | 0.9775 | 0.7097 | 0.8753 | 0.0709 |
| BSCL2      | 0.7708 | 1.2515 | 0.8411 | 0.6383 | 0.8754 | 0.1322 |
| ELL        | 0.8828 | 1.0303 | 0.8487 | 0.7400 | 0.8755 | 0.0599 |
| SLC35B3    | 0.8389 | 1.0412 | 0.9450 | 0.6768 | 0.8755 | 0.0781 |
| LOC1001293 | 0.7703 | 1.0255 | 0.9392 | 0.7669 | 0.8755 | 0.0642 |
| ARFGAP1    | 0.8083 | 1.0323 | 0.8931 | 0.7683 | 0.8755 | 0.0584 |
| DHX35      | 0.7117 | 1.2424 | 0.7339 | 0.8144 | 0.8756 | 0.1242 |
| GTF2IP1    | 0.6797 | 1.1934 | 0.9731 | 0.6565 | 0.8757 | 0.1281 |
| KIAA0101   | 0.7670 | 1.1797 | 0.8598 | 0.6962 | 0.8757 | 0.1067 |
| LOC730274  | 0.8693 | 0.9592 | 0.9368 | 0.7377 | 0.8758 | 0.0498 |
| ACBD7      | 0.7743 | 1.0363 | 0.9168 | 0.7756 | 0.8758 | 0.0631 |
| GNB2       | 0.8412 | 1.1091 | 0.8320 | 0.7209 | 0.8758 | 0.0824 |
| FAM8A1     | 0.8399 | 0.8728 | 1.0460 | 0.7444 | 0.8758 | 0.0629 |
| PRMT7      | 0.6889 | 1.3303 | 0.7273 | 0.7568 | 0.8758 | 0.1521 |
| LOC1001290 | 0.6603 | 0.9137 | 1.3837 | 0.5458 | 0.8759 | 0.1859 |
| CTSZ       | 0.7917 | 1.0694 | 0.8559 | 0.7866 | 0.8759 | 0.0664 |
| TRAF2      | 0.7826 | 0.9949 | 0.9695 | 0.7566 | 0.8759 | 0.0618 |
| C1QBP      | 0.7147 | 1.3126 | 0.8123 | 0.6641 | 0.8759 | 0.1488 |

|            |        |        |        |        |        |        |
|------------|--------|--------|--------|--------|--------|--------|
| TUG1       | 0.8588 | 1.1867 | 0.8197 | 0.6386 | 0.8760 | 0.1141 |
| TSPAN33    | 0.6562 | 1.2228 | 0.9512 | 0.6738 | 0.8760 | 0.1339 |
| RCE1       | 0.7603 | 1.1175 | 0.8384 | 0.7878 | 0.8760 | 0.0821 |
| FGD1       | 0.7513 | 1.0922 | 0.8498 | 0.8112 | 0.8761 | 0.0748 |
| C14orf162  | 0.8770 | 0.9226 | 0.8091 | 0.8961 | 0.8762 | 0.0242 |
| EZR        | 0.8554 | 1.0787 | 0.8855 | 0.6855 | 0.8763 | 0.0806 |
| GYLTL1B    | 0.8512 | 0.9733 | 0.8560 | 0.8246 | 0.8763 | 0.0331 |
| SNORA62    | 0.7910 | 0.9532 | 0.9021 | 0.8590 | 0.8763 | 0.0343 |
| CISD3      | 0.6001 | 1.1756 | 0.9207 | 0.8090 | 0.8764 | 0.1199 |
| CYorf15A   | 0.6827 | 1.2385 | 0.9575 | 0.6268 | 0.8764 | 0.1407 |
| NEURL2     | 0.7796 | 0.9623 | 0.9434 | 0.8205 | 0.8765 | 0.0451 |
| SNORA17    | 0.6409 | 1.0301 | 0.9182 | 0.9171 | 0.8766 | 0.0829 |
| AHSA2      | 0.7785 | 1.0543 | 0.9649 | 0.7088 | 0.8767 | 0.0802 |
| RALB       | 0.6709 | 1.2140 | 0.9411 | 0.6807 | 0.8767 | 0.1287 |
| CNTNAP2    | 0.8138 | 0.9941 | 0.8778 | 0.8213 | 0.8767 | 0.0416 |
| PIN1       | 0.7188 | 1.2294 | 0.9210 | 0.6378 | 0.8768 | 0.1318 |
| ZXDB       | 0.7801 | 1.1177 | 0.8437 | 0.7656 | 0.8768 | 0.0821 |
| MTHFD2L    | 0.8650 | 1.0664 | 0.8529 | 0.7229 | 0.8768 | 0.0709 |
| REEP3      | 0.5990 | 1.1656 | 1.0690 | 0.6736 | 0.8768 | 0.1411 |
| FAM21A     | 0.7535 | 1.0839 | 0.8771 | 0.7928 | 0.8768 | 0.0737 |
| POLR1B     | 0.6995 | 1.0791 | 0.9761 | 0.7525 | 0.8768 | 0.0902 |
| HCG2P7     | 0.7472 | 1.0910 | 0.9171 | 0.7522 | 0.8769 | 0.0816 |
| MSL3       | 0.7781 | 1.1217 | 0.8644 | 0.7434 | 0.8769 | 0.0855 |
| RCBTB1     | 0.8149 | 1.0355 | 0.8198 | 0.8376 | 0.8770 | 0.0531 |
| BEX5       | 0.8115 | 0.9486 | 0.9113 | 0.8365 | 0.8770 | 0.0319 |
| SNORD49A   | 0.8354 | 1.0202 | 0.8763 | 0.7762 | 0.8770 | 0.0520 |
| HYOU1      | 0.7912 | 1.1081 | 0.8763 | 0.7324 | 0.8770 | 0.0825 |
| LOC1001322 | 0.6462 | 1.3729 | 0.7679 | 0.7213 | 0.8771 | 0.1672 |
| LOC653888  | 0.8000 | 1.1188 | 0.7820 | 0.8079 | 0.8772 | 0.0807 |
| RPL21      | 0.6086 | 1.2357 | 1.0663 | 0.5982 | 0.8772 | 0.1618 |
| LMNA       | 0.8002 | 1.1524 | 0.8425 | 0.7138 | 0.8772 | 0.0956 |
| ZNF93      | 0.7535 | 1.0212 | 0.9353 | 0.7990 | 0.8772 | 0.0616 |
| LOC652517  | 0.8563 | 0.9172 | 0.9209 | 0.8147 | 0.8772 | 0.0256 |
| BEND3      | 0.7641 | 1.0936 | 0.8572 | 0.7943 | 0.8773 | 0.0747 |
| CPNE1      | 0.7102 | 1.1922 | 0.8721 | 0.7348 | 0.8773 | 0.1108 |
| LOC1001301 | 0.8168 | 1.0047 | 0.9000 | 0.7879 | 0.8773 | 0.0486 |
| SNORD17    | 0.8169 | 1.0455 | 0.7898 | 0.8573 | 0.8774 | 0.0577 |
| ZNF217     | 0.8418 | 1.1811 | 0.9125 | 0.5742 | 0.8774 | 0.1247 |
| FKBPL      | 0.7276 | 1.0509 | 0.8916 | 0.8395 | 0.8774 | 0.0672 |
| LOC645168  | 0.8109 | 0.9684 | 0.8734 | 0.8570 | 0.8774 | 0.0331 |
| LOC388588  | 0.6957 | 1.1744 | 0.9436 | 0.6960 | 0.8774 | 0.1149 |
| LOC1001318 | 0.5417 | 1.3632 | 0.9319 | 0.6732 | 0.8775 | 0.1810 |
| NCLN       | 0.7797 | 1.2902 | 0.7915 | 0.6490 | 0.8776 | 0.1413 |
| LGALS1     | 0.8174 | 1.0579 | 0.8480 | 0.7871 | 0.8776 | 0.0614 |
| KIAA1143   | 0.7222 | 1.0845 | 0.9601 | 0.7435 | 0.8776 | 0.0874 |
| ZNF677     | 0.9437 | 0.9625 | 0.9047 | 0.6996 | 0.8776 | 0.0606 |



|            |        |        |        |        |        |        |
|------------|--------|--------|--------|--------|--------|--------|
| CCNL1      | 0.7259 | 1.2547 | 0.8500 | 0.6801 | 0.8777 | 0.1307 |
| ZNF827     | 0.7652 | 1.0891 | 0.8756 | 0.7808 | 0.8777 | 0.0746 |
| NARG1L     | 0.8433 | 0.9569 | 0.9221 | 0.7885 | 0.8777 | 0.0381 |
| SIVA       | 0.6077 | 1.3101 | 0.9513 | 0.6418 | 0.8777 | 0.1635 |
| PEX16      | 0.7600 | 1.2822 | 0.8593 | 0.6094 | 0.8777 | 0.1443 |
| SLC25A1    | 0.7564 | 1.1896 | 0.8904 | 0.6745 | 0.8777 | 0.1131 |
| PFDN1      | 0.6988 | 1.1695 | 0.9296 | 0.7132 | 0.8778 | 0.1106 |
| LARP6      | 0.7240 | 1.0846 | 0.9708 | 0.7320 | 0.8779 | 0.0896 |
| APOOL      | 0.6658 | 1.0447 | 0.9854 | 0.8156 | 0.8779 | 0.0857 |
| HS3ST3B1   | 0.7614 | 0.9233 | 0.8844 | 0.9426 | 0.8779 | 0.0407 |
| LOC731724  | 0.9487 | 0.9555 | 0.9079 | 0.6995 | 0.8779 | 0.0604 |
| CNOT6L     | 0.7313 | 1.0335 | 0.9434 | 0.8036 | 0.8779 | 0.0680 |
| CRYZ       | 0.6152 | 1.1826 | 1.0669 | 0.6472 | 0.8780 | 0.1446 |
| CCDC74A    | 0.8723 | 1.1398 | 0.7326 | 0.7673 | 0.8780 | 0.0922 |
| AUP1       | 0.8833 | 0.8781 | 1.0047 | 0.7461 | 0.8781 | 0.0528 |
| ATP1B1     | 0.7596 | 1.2561 | 0.9375 | 0.5592 | 0.8781 | 0.1478 |
| FLJ20273   | 0.8815 | 1.0179 | 0.8853 | 0.7278 | 0.8781 | 0.0593 |
| EP400      | 0.7689 | 1.1743 | 0.7577 | 0.8115 | 0.8781 | 0.0994 |
| PPM1E      | 0.8301 | 0.9973 | 0.9519 | 0.7333 | 0.8782 | 0.0598 |
| AP3D1      | 0.7691 | 1.2316 | 0.8338 | 0.6783 | 0.8782 | 0.1220 |
| RIOK1      | 0.7532 | 1.1047 | 0.8911 | 0.7639 | 0.8782 | 0.0817 |
| KRIT1      | 0.8050 | 1.0123 | 0.9581 | 0.7375 | 0.8782 | 0.0642 |
| NARG2      | 0.8385 | 1.0182 | 0.8924 | 0.7638 | 0.8782 | 0.0536 |
| INTS12     | 0.7165 | 1.0842 | 0.9397 | 0.7728 | 0.8783 | 0.0834 |
| SGK196     | 0.7636 | 1.0239 | 0.9545 | 0.7712 | 0.8783 | 0.0656 |
| KHK        | 0.8279 | 0.9735 | 0.9201 | 0.7917 | 0.8783 | 0.0417 |
| C9orf119   | 0.8111 | 1.1160 | 0.8925 | 0.6937 | 0.8783 | 0.0891 |
| LOC1001334 | 0.8813 | 0.9997 | 0.8929 | 0.7396 | 0.8784 | 0.0534 |
| SPRED1     | 0.7401 | 1.1500 | 0.9377 | 0.6856 | 0.8784 | 0.1055 |
| PSIP1      | 0.7435 | 1.0469 | 0.9736 | 0.7495 | 0.8784 | 0.0776 |
| LOC645430  | 0.7172 | 1.0956 | 1.0151 | 0.6857 | 0.8784 | 0.1037 |
| FAM10A7    | 0.6359 | 1.3356 | 0.8576 | 0.6848 | 0.8785 | 0.1596 |
| TMUB1      | 0.8463 | 1.0166 | 0.8825 | 0.7687 | 0.8785 | 0.0518 |
| FAM101B    | 0.8177 | 0.9900 | 0.8486 | 0.8578 | 0.8785 | 0.0381 |
| LOC1001324 | 0.7711 | 1.0132 | 0.9852 | 0.7449 | 0.8786 | 0.0701 |
| TRIM59     | 0.8305 | 1.0867 | 0.9157 | 0.6816 | 0.8786 | 0.0846 |
| ENPP1      | 0.7765 | 1.0198 | 0.9081 | 0.8102 | 0.8787 | 0.0547 |
| RNF25      | 0.8666 | 0.9657 | 0.8741 | 0.8083 | 0.8787 | 0.0325 |
| PIF1       | 0.8562 | 0.9639 | 0.8860 | 0.8087 | 0.8787 | 0.0326 |
| C17orf42   | 0.7682 | 1.0846 | 0.9595 | 0.7027 | 0.8787 | 0.0876 |
| PDIA5      | 0.7929 | 1.1895 | 0.9086 | 0.6239 | 0.8787 | 0.1189 |
| NACC2      | 0.6790 | 1.0309 | 0.9312 | 0.8739 | 0.8787 | 0.0741 |
| LOC1001909 | 0.6229 | 1.0575 | 0.9065 | 0.9282 | 0.8788 | 0.0916 |
| PANK1      | 0.7536 | 1.0948 | 0.9478 | 0.7190 | 0.8788 | 0.0878 |
| DDA1       | 0.7873 | 1.1270 | 0.8813 | 0.7196 | 0.8788 | 0.0891 |
| LOC399815  | 0.7745 | 0.9967 | 0.8403 | 0.9037 | 0.8788 | 0.0473 |

|           |        |        |        |        |        |        |
|-----------|--------|--------|--------|--------|--------|--------|
| HIC2      | 0.6712 | 1.1646 | 0.8415 | 0.8381 | 0.8789 | 0.1032 |
| VPS37C    | 0.8668 | 1.1235 | 0.8089 | 0.7164 | 0.8789 | 0.0872 |
| CBL       | 0.6974 | 1.1067 | 0.9232 | 0.7883 | 0.8789 | 0.0890 |
| CELSR2    | 0.8592 | 1.0229 | 0.9484 | 0.6852 | 0.8789 | 0.0727 |
| C20orf86  | 0.9409 | 0.7096 | 1.0708 | 0.7945 | 0.8789 | 0.0798 |
| RNFT1     | 0.7901 | 1.0960 | 0.8814 | 0.7482 | 0.8790 | 0.0775 |
| PUSL1     | 0.7269 | 1.1405 | 0.9112 | 0.7373 | 0.8790 | 0.0969 |
| GBE1      | 0.9217 | 1.1001 | 0.8008 | 0.6933 | 0.8790 | 0.0872 |
| ANKDD1A   | 0.8153 | 1.0194 | 0.8496 | 0.8318 | 0.8790 | 0.0473 |
| DUSP18    | 0.9027 | 0.9275 | 0.8518 | 0.8341 | 0.8790 | 0.0218 |
| RPP25     | 0.8053 | 0.9787 | 0.8102 | 0.9220 | 0.8790 | 0.0428 |
| UHRF2     | 0.8426 | 0.9321 | 0.9123 | 0.8292 | 0.8790 | 0.0254 |
| ZNF225    | 0.8369 | 0.9718 | 0.9116 | 0.7962 | 0.8791 | 0.0391 |
| DPM1      | 0.6860 | 1.1374 | 0.9749 | 0.7185 | 0.8792 | 0.1076 |
| PGLS      | 0.8696 | 1.0831 | 0.8842 | 0.6799 | 0.8792 | 0.0824 |
| STK17B    | 0.7631 | 1.0195 | 0.9172 | 0.8172 | 0.8792 | 0.0566 |
| OR7G1     | 0.8383 | 1.0610 | 0.8632 | 0.7545 | 0.8793 | 0.0649 |
| GAGE2E    | 0.8332 | 1.2374 | 0.8215 | 0.6250 | 0.8793 | 0.1286 |
| PPARGC1B  | 0.7718 | 0.9025 | 0.9328 | 0.9100 | 0.8793 | 0.0364 |
| LOC387791 | 0.7154 | 1.0262 | 1.1961 | 0.5795 | 0.8793 | 0.1410 |
| C1orf57   | 0.6495 | 1.1214 | 1.0327 | 0.7136 | 0.8793 | 0.1163 |
| RELA      | 0.8267 | 1.0253 | 0.8570 | 0.8083 | 0.8793 | 0.0497 |
| RBM18     | 0.7160 | 1.1411 | 0.9599 | 0.7005 | 0.8794 | 0.1055 |
| ZNF26     | 0.8094 | 1.0201 | 0.9528 | 0.7353 | 0.8794 | 0.0651 |
| PRDX6     | 0.6748 | 1.1228 | 0.9987 | 0.7213 | 0.8794 | 0.1082 |
| C4orf39   | 0.8893 | 0.9827 | 0.8660 | 0.7797 | 0.8794 | 0.0417 |
| TMEM108   | 0.8040 | 1.0000 | 0.9209 | 0.7933 | 0.8795 | 0.0495 |
| IPO9      | 0.8078 | 1.1386 | 0.8640 | 0.7081 | 0.8796 | 0.0922 |
| PRRG4     | 0.7169 | 1.2457 | 0.8312 | 0.7249 | 0.8797 | 0.1248 |
| CSNK2A1P  | 0.7322 | 1.2283 | 0.9143 | 0.6439 | 0.8797 | 0.1291 |
| ACTR3B    | 0.8052 | 1.0845 | 0.8935 | 0.7358 | 0.8798 | 0.0755 |
| SCAND1    | 0.7234 | 1.2501 | 0.8865 | 0.6590 | 0.8798 | 0.1324 |
| C1orf97   | 0.7064 | 1.1897 | 0.9933 | 0.6298 | 0.8798 | 0.1296 |
| TSEN15    | 0.7699 | 1.0207 | 0.9594 | 0.7693 | 0.8798 | 0.0649 |
| WVVOX     | 0.7825 | 1.0049 | 0.9275 | 0.8044 | 0.8798 | 0.0525 |
| SLC7A6    | 0.7879 | 1.0508 | 0.8564 | 0.8242 | 0.8798 | 0.0587 |
| LOC652657 | 0.7872 | 1.0054 | 0.9439 | 0.7829 | 0.8799 | 0.0562 |
| TIMM17A   | 0.8475 | 0.9543 | 0.9256 | 0.7923 | 0.8799 | 0.0369 |
| SMARCA1   | 0.7984 | 1.2648 | 0.8249 | 0.6316 | 0.8799 | 0.1352 |
| IGFBP2    | 0.8721 | 1.0279 | 0.8741 | 0.7457 | 0.8800 | 0.0578 |
| EPM2AIP1  | 0.8467 | 1.1037 | 0.8806 | 0.6889 | 0.8800 | 0.0855 |
| SRF       | 0.8435 | 1.0701 | 0.8723 | 0.7342 | 0.8800 | 0.0700 |
| LOC652607 | 0.9324 | 0.8688 | 0.8662 | 0.8526 | 0.8800 | 0.0178 |
| NSMCE1    | 0.6925 | 1.2419 | 0.8900 | 0.6957 | 0.8800 | 0.1292 |
| WRN       | 0.8108 | 1.0752 | 0.8199 | 0.8143 | 0.8801 | 0.0651 |
| ISG20L2   | 0.7682 | 1.2454 | 0.8706 | 0.6361 | 0.8801 | 0.1309 |

|            |        |        |        |        |        |        |
|------------|--------|--------|--------|--------|--------|--------|
| PIGN       | 0.8312 | 1.1725 | 0.8070 | 0.7096 | 0.8801 | 0.1010 |
| MAK10      | 0.7512 | 1.1542 | 0.8835 | 0.7316 | 0.8801 | 0.0974 |
| LOC1001330 | 0.7774 | 0.9426 | 0.9489 | 0.8517 | 0.8802 | 0.0408 |
| CBX1       | 0.8079 | 0.9326 | 1.0642 | 0.7159 | 0.8802 | 0.0757 |
| LOC1001336 | 0.8339 | 1.0172 | 1.0754 | 0.5942 | 0.8802 | 0.1083 |
| SLC30A3    | 0.7485 | 1.1212 | 0.8737 | 0.7773 | 0.8802 | 0.0847 |
| ACTG1      | 0.7092 | 1.1169 | 0.9705 | 0.7241 | 0.8802 | 0.0991 |
| LOC1001307 | 0.6687 | 1.0840 | 1.1431 | 0.6250 | 0.8802 | 0.1356 |
| C21orf70   | 0.6988 | 1.1304 | 0.9309 | 0.7610 | 0.8803 | 0.0967 |
| SDF4       | 0.8977 | 1.0191 | 0.8860 | 0.7183 | 0.8803 | 0.0618 |
| TOR1A      | 0.9039 | 1.1957 | 0.7563 | 0.6654 | 0.8803 | 0.1160 |
| C4orf42    | 0.8054 | 1.0873 | 0.9284 | 0.7002 | 0.8803 | 0.0833 |
| WRB        | 0.7042 | 1.1356 | 1.0866 | 0.5951 | 0.8804 | 0.1354 |
| LIPA       | 0.6716 | 1.0857 | 1.0584 | 0.7058 | 0.8804 | 0.1110 |
| LOC648984  | 0.7259 | 1.0850 | 0.9460 | 0.7645 | 0.8804 | 0.0834 |
| LOC643310  | 0.7220 | 1.0641 | 1.1809 | 0.5544 | 0.8804 | 0.1459 |
| INO80      | 0.8249 | 1.1220 | 0.8464 | 0.7281 | 0.8804 | 0.0846 |
| LOC729841  | 0.8066 | 1.2130 | 0.8130 | 0.6888 | 0.8804 | 0.1145 |
| LOC285216  | 0.7891 | 0.9256 | 0.9182 | 0.8887 | 0.8804 | 0.0315 |
| TRMT61A    | 0.8062 | 1.0374 | 0.8885 | 0.7895 | 0.8804 | 0.0566 |
| ANKRD40    | 0.7682 | 1.0565 | 0.8820 | 0.8150 | 0.8804 | 0.0632 |
| HAS3       | 0.8329 | 0.9037 | 0.9170 | 0.8682 | 0.8804 | 0.0189 |
| ZNF670     | 0.7353 | 0.9996 | 0.9465 | 0.8405 | 0.8805 | 0.0586 |
| ATP13A1    | 0.8518 | 1.0034 | 0.9202 | 0.7466 | 0.8805 | 0.0543 |
| RNF8       | 0.8497 | 1.0589 | 0.8607 | 0.7527 | 0.8805 | 0.0642 |
| LOC644615  | 0.6631 | 1.0026 | 1.1025 | 0.7538 | 0.8805 | 0.1031 |
| MPI        | 0.7329 | 1.3074 | 0.7639 | 0.7178 | 0.8805 | 0.1426 |
| FKTN       | 0.7542 | 1.1398 | 0.9689 | 0.6594 | 0.8805 | 0.1080 |
| CHAC2      | 0.7508 | 0.8993 | 1.0004 | 0.8717 | 0.8806 | 0.0513 |
| LOC729142  | 0.8296 | 0.9055 | 1.0394 | 0.7480 | 0.8806 | 0.0619 |
| CENPV      | 0.7374 | 1.1063 | 0.9291 | 0.7496 | 0.8806 | 0.0871 |
| COL20A1    | 0.7056 | 0.9609 | 0.9780 | 0.8780 | 0.8806 | 0.0623 |
| RBM12      | 0.7619 | 1.0894 | 0.9236 | 0.7477 | 0.8807 | 0.0802 |
| C1orf96    | 0.8988 | 0.9237 | 0.9567 | 0.7436 | 0.8807 | 0.0472 |
| ORAOV1     | 0.6655 | 1.2060 | 0.8345 | 0.8169 | 0.8807 | 0.1149 |
| CASD1      | 0.7607 | 1.1305 | 0.9153 | 0.7168 | 0.8808 | 0.0935 |
| BEND7      | 0.7383 | 1.0468 | 0.9159 | 0.8227 | 0.8809 | 0.0661 |
| B3GNT1     | 0.8198 | 1.0025 | 1.0268 | 0.6747 | 0.8809 | 0.0828 |
| B4GALT3    | 0.8183 | 1.1057 | 0.9324 | 0.6674 | 0.8809 | 0.0925 |
| PRRG1      | 0.7287 | 1.1189 | 0.9629 | 0.7133 | 0.8810 | 0.0977 |
| ZNF57      | 0.7423 | 1.0802 | 0.9665 | 0.7350 | 0.8810 | 0.0854 |
| NRM        | 0.8684 | 1.0215 | 0.8482 | 0.7859 | 0.8810 | 0.0500 |
| DDHD2      | 0.6808 | 1.1920 | 0.9183 | 0.7332 | 0.8811 | 0.1155 |
| LOC651166  | 0.7845 | 0.9596 | 0.8741 | 0.9061 | 0.8811 | 0.0367 |
| C2orf44    | 0.8090 | 1.1608 | 0.8886 | 0.6661 | 0.8811 | 0.1040 |
| FAM162A    | 0.7592 | 0.8998 | 1.1538 | 0.7116 | 0.8811 | 0.0993 |

|            |        |        |        |        |        |        |
|------------|--------|--------|--------|--------|--------|--------|
| LOC1001310 | 0.8475 | 0.9654 | 0.8884 | 0.8232 | 0.8811 | 0.0312 |
| ARMC6      | 0.7751 | 1.1443 | 0.8613 | 0.7438 | 0.8811 | 0.0912 |
| UBAP2      | 0.8263 | 1.1024 | 0.8922 | 0.7037 | 0.8812 | 0.0835 |
| DUSP28     | 0.7929 | 1.2684 | 0.8721 | 0.5913 | 0.8812 | 0.1420 |
| CLDN3      | 0.7158 | 1.2664 | 0.8314 | 0.7110 | 0.8812 | 0.1314 |
| PPPDE2     | 0.6672 | 1.2419 | 0.9063 | 0.7092 | 0.8812 | 0.1311 |
| UFD1L      | 0.8258 | 0.9822 | 0.9368 | 0.7800 | 0.8812 | 0.0471 |
| FAM156A    | 0.7433 | 1.0751 | 0.8754 | 0.8311 | 0.8812 | 0.0702 |
| ZCCHC11    | 0.8178 | 1.1844 | 0.8229 | 0.6999 | 0.8813 | 0.1050 |
| VEZT       | 0.7664 | 1.1338 | 0.8466 | 0.7783 | 0.8813 | 0.0860 |
| ATP5I      | 0.7223 | 1.1419 | 0.9515 | 0.7096 | 0.8813 | 0.1031 |
| LRFN4      | 0.7414 | 0.9283 | 1.0287 | 0.8269 | 0.8813 | 0.0622 |
| CEPT1      | 0.6547 | 1.1742 | 0.9585 | 0.7379 | 0.8813 | 0.1168 |
| LOC729686  | 0.6995 | 1.0397 | 1.1481 | 0.6381 | 0.8814 | 0.1253 |
| ATXN10     | 0.8607 | 1.0284 | 0.8972 | 0.7392 | 0.8814 | 0.0595 |
| GAGE12J    | 0.7811 | 1.0859 | 0.8465 | 0.8119 | 0.8814 | 0.0695 |
| LOC649009  | 0.8437 | 1.0062 | 0.8803 | 0.7953 | 0.8814 | 0.0451 |
| ATP6V0A1   | 0.8309 | 1.1992 | 0.7635 | 0.7321 | 0.8814 | 0.1079 |
| SH3D19     | 0.8014 | 1.0999 | 1.0319 | 0.5928 | 0.8815 | 0.1155 |
| LOC728723  | 0.7389 | 1.1580 | 0.8899 | 0.7393 | 0.8815 | 0.0988 |
| LFNG       | 0.7497 | 1.0339 | 0.9277 | 0.8150 | 0.8816 | 0.0627 |
| ISYNA1     | 0.9127 | 0.8779 | 0.9397 | 0.7961 | 0.8816 | 0.0312 |
| ITGB1BP1   | 0.7234 | 1.0714 | 0.9782 | 0.7534 | 0.8816 | 0.0851 |
| MUDENG     | 0.7094 | 1.1512 | 0.8995 | 0.7667 | 0.8817 | 0.0983 |
| PRPF8      | 0.8340 | 1.0698 | 0.8346 | 0.7887 | 0.8818 | 0.0636 |
| CD22       | 0.8049 | 0.9941 | 0.8377 | 0.8904 | 0.8818 | 0.0414 |
| RBM24      | 0.8188 | 0.9671 | 0.9875 | 0.7538 | 0.8818 | 0.0569 |
| MKNK1      | 0.7493 | 1.2335 | 0.7933 | 0.7511 | 0.8818 | 0.1177 |
| LOC728965  | 0.7606 | 0.9797 | 0.9738 | 0.8132 | 0.8818 | 0.0558 |
| LOC1001341 | 0.7262 | 1.0994 | 0.8390 | 0.8628 | 0.8818 | 0.0784 |
| AKAP7      | 0.7777 | 1.0275 | 0.8740 | 0.8483 | 0.8819 | 0.0526 |
| FNIP2      | 0.8502 | 0.8365 | 0.9899 | 0.8509 | 0.8819 | 0.0362 |
| EGLN1      | 0.7151 | 1.1171 | 0.9283 | 0.7670 | 0.8819 | 0.0906 |
| PASK       | 0.8874 | 1.2003 | 0.7684 | 0.6717 | 0.8819 | 0.1149 |
| UBE2V2     | 0.8486 | 1.1000 | 0.9812 | 0.5979 | 0.8820 | 0.1077 |
| UBXN7      | 0.7463 | 1.0541 | 0.8650 | 0.8627 | 0.8820 | 0.0637 |
| PKN1       | 0.8542 | 1.0860 | 0.8513 | 0.7367 | 0.8821 | 0.0733 |
| MIR26B     | 0.8753 | 0.9391 | 0.8948 | 0.8190 | 0.8821 | 0.0249 |
| SNX3       | 0.7994 | 1.1325 | 0.9965 | 0.6002 | 0.8821 | 0.1162 |
| FLJ20489   | 0.8047 | 1.0519 | 0.9220 | 0.7503 | 0.8822 | 0.0670 |
| FKSG2      | 0.8441 | 0.9942 | 0.8002 | 0.8903 | 0.8822 | 0.0416 |
| C4orf41    | 0.8937 | 1.0937 | 0.8491 | 0.6924 | 0.8822 | 0.0827 |
| LOC653450  | 0.7184 | 1.2376 | 0.8786 | 0.6944 | 0.8823 | 0.1253 |
| LASS1      | 0.7413 | 0.9742 | 0.9494 | 0.8642 | 0.8823 | 0.0526 |
| RNGTT      | 0.7909 | 1.0130 | 0.9587 | 0.7671 | 0.8824 | 0.0609 |
| LOC648626  | 0.7633 | 0.9182 | 0.9058 | 0.9426 | 0.8825 | 0.0405 |

|            |        |        |        |        |        |        |
|------------|--------|--------|--------|--------|--------|--------|
| GAGE12C    | 0.6746 | 1.1510 | 1.0050 | 0.6994 | 0.8825 | 0.1168 |
| LOC645723  | 0.8265 | 1.0124 | 0.9577 | 0.7334 | 0.8825 | 0.0632 |
| TMEM50A    | 0.7578 | 1.0994 | 0.8785 | 0.7944 | 0.8825 | 0.0766 |
| LOC644000  | 0.8405 | 0.9651 | 0.8525 | 0.8719 | 0.8825 | 0.0283 |
| LOC1001299 | 0.7106 | 1.1551 | 0.9292 | 0.7352 | 0.8825 | 0.1032 |
| ADCY1      | 0.7677 | 1.1531 | 0.7989 | 0.8106 | 0.8825 | 0.0906 |
| TRIO       | 0.8686 | 0.9621 | 0.8402 | 0.8594 | 0.8825 | 0.0272 |
| CDC37      | 0.7774 | 1.2152 | 0.9144 | 0.6232 | 0.8826 | 0.1258 |
| NACAP1     | 0.7719 | 1.0014 | 1.1371 | 0.6201 | 0.8826 | 0.1155 |
| TMEM164    | 0.8167 | 1.1191 | 0.8634 | 0.7311 | 0.8826 | 0.0835 |
| B3GNTL1    | 0.8667 | 1.0365 | 0.9029 | 0.7245 | 0.8826 | 0.0641 |
| FDX1L      | 0.6907 | 1.2921 | 0.8816 | 0.6663 | 0.8827 | 0.1447 |
| STXBP2     | 0.8241 | 1.0740 | 0.8836 | 0.7491 | 0.8827 | 0.0695 |
| LASP1      | 0.7980 | 1.2795 | 0.7858 | 0.6676 | 0.8827 | 0.1355 |
| FAM89B     | 0.7984 | 1.2805 | 0.7353 | 0.7169 | 0.8828 | 0.1337 |
| LRRC58     | 0.9232 | 1.0360 | 0.9149 | 0.6571 | 0.8828 | 0.0802 |
| AMY1B      | 0.8565 | 0.9553 | 0.9262 | 0.7932 | 0.8828 | 0.0364 |
| WDR20      | 0.7677 | 1.1382 | 0.8311 | 0.7942 | 0.8828 | 0.0861 |
| LOC643446  | 0.6946 | 1.2989 | 0.8438 | 0.6939 | 0.8828 | 0.1431 |
| PIPSL      | 0.7214 | 1.1511 | 0.9150 | 0.7438 | 0.8828 | 0.0993 |
| C10orf28   | 0.7119 | 1.1555 | 0.8862 | 0.7777 | 0.8828 | 0.0977 |
| TMEM120A   | 0.8729 | 1.0936 | 0.9170 | 0.6479 | 0.8828 | 0.0917 |
| LOC1001255 | 0.8568 | 0.9908 | 0.9303 | 0.7535 | 0.8828 | 0.0511 |
| DHRS13     | 0.7082 | 1.2713 | 0.8969 | 0.6551 | 0.8829 | 0.1395 |
| PLIN5      | 0.7855 | 0.8779 | 1.0688 | 0.7994 | 0.8829 | 0.0652 |
| EGFR       | 0.7847 | 1.0287 | 0.9002 | 0.8181 | 0.8829 | 0.0543 |
| ZC3H4      | 0.7583 | 1.0899 | 0.9186 | 0.7650 | 0.8829 | 0.0783 |
| OXSRI      | 0.8634 | 1.0979 | 0.8808 | 0.6899 | 0.8830 | 0.0836 |
| HSPC157    | 0.7144 | 1.1733 | 0.9525 | 0.6920 | 0.8831 | 0.1133 |
| LOC1001320 | 0.8652 | 0.9773 | 0.9165 | 0.7734 | 0.8831 | 0.0431 |
| HNRPLL     | 0.7209 | 1.0331 | 1.0685 | 0.7098 | 0.8831 | 0.0971 |
| TBP        | 0.7848 | 1.1018 | 0.9112 | 0.7346 | 0.8831 | 0.0818 |
| LOC649970  | 0.7648 | 1.1513 | 0.9448 | 0.6715 | 0.8831 | 0.1059 |
| GPR157     | 0.7869 | 1.0424 | 0.8938 | 0.8102 | 0.8833 | 0.0578 |
| DDX18      | 0.6544 | 1.1721 | 0.9447 | 0.7621 | 0.8833 | 0.1134 |
| STXBP6     | 0.7347 | 1.0465 | 0.9576 | 0.7946 | 0.8834 | 0.0720 |
| BCL9       | 0.8874 | 1.0248 | 0.8686 | 0.7532 | 0.8835 | 0.0557 |
| STAM2      | 0.7692 | 1.1728 | 0.9232 | 0.6689 | 0.8835 | 0.1097 |
| LOC729524  | 0.8044 | 1.0488 | 0.8526 | 0.8284 | 0.8836 | 0.0559 |
| PAQR3      | 0.7768 | 0.9693 | 1.0948 | 0.6933 | 0.8836 | 0.0911 |
| NDUFV1     | 0.7811 | 1.2250 | 0.8711 | 0.6571 | 0.8836 | 0.1220 |
| ATP5H      | 0.7006 | 1.1757 | 0.9406 | 0.7175 | 0.8836 | 0.1117 |
| C12orf43   | 0.7424 | 1.0347 | 1.0474 | 0.7099 | 0.8836 | 0.0912 |
| MIR1909    | 0.7916 | 1.0225 | 0.8714 | 0.8490 | 0.8836 | 0.0492 |
| MZF1       | 0.7562 | 1.2224 | 0.7970 | 0.7591 | 0.8836 | 0.1133 |
| PRKRIP1    | 0.6417 | 1.1879 | 0.8388 | 0.8664 | 0.8837 | 0.1131 |

|            |        |        |        |        |        |        |
|------------|--------|--------|--------|--------|--------|--------|
| GJC1       | 0.6602 | 1.1539 | 0.9401 | 0.7805 | 0.8837 | 0.1068 |
| ZNF280D    | 0.8317 | 1.0819 | 0.9350 | 0.6863 | 0.8837 | 0.0834 |
| HMOX2      | 0.8754 | 1.0764 | 0.8567 | 0.7264 | 0.8837 | 0.0723 |
| ILKAP      | 0.7782 | 1.0947 | 0.8638 | 0.7983 | 0.8838 | 0.0726 |
| RHOD       | 0.6377 | 1.3128 | 0.8753 | 0.7092 | 0.8838 | 0.1514 |
| LOC407835  | 0.8968 | 1.0567 | 0.8309 | 0.7507 | 0.8838 | 0.0649 |
| LOC729298  | 0.7324 | 1.1744 | 0.8957 | 0.7329 | 0.8839 | 0.1042 |
| FAM105B    | 0.7923 | 1.1602 | 0.8740 | 0.7090 | 0.8839 | 0.0981 |
| HRASLS3    | 0.8453 | 1.1881 | 0.8390 | 0.6632 | 0.8839 | 0.1098 |
| CGI-96     | 0.7823 | 0.9738 | 0.9953 | 0.7844 | 0.8839 | 0.0583 |
| NOL3       | 0.7660 | 1.2058 | 0.8754 | 0.6887 | 0.8840 | 0.1139 |
| VWA1       | 0.8118 | 1.1144 | 0.8321 | 0.7775 | 0.8840 | 0.0776 |
| SQSTM1     | 0.8530 | 1.2942 | 0.7712 | 0.6176 | 0.8840 | 0.1452 |
| PEPD       | 0.7590 | 1.1058 | 0.8612 | 0.8099 | 0.8840 | 0.0768 |
| CCDC66     | 0.8318 | 0.9924 | 0.8799 | 0.8320 | 0.8840 | 0.0379 |
| SNORA11    | 0.8597 | 1.0234 | 0.8639 | 0.7891 | 0.8840 | 0.0495 |
| LOC134541  | 0.8720 | 0.8861 | 1.0114 | 0.7667 | 0.8840 | 0.0501 |
| OR6C75     | 0.7513 | 0.9360 | 1.0022 | 0.8467 | 0.8841 | 0.0545 |
| NPAT       | 0.7382 | 1.0253 | 1.0090 | 0.7638 | 0.8841 | 0.0771 |
| LOC401010  | 0.8598 | 0.9850 | 0.9320 | 0.7595 | 0.8841 | 0.0488 |
| LOC648966  | 0.7705 | 0.9725 | 0.9505 | 0.8432 | 0.8842 | 0.0473 |
| TCIRG1     | 0.7735 | 1.0375 | 0.9254 | 0.8003 | 0.8842 | 0.0609 |
| GAGE12I    | 0.7557 | 1.0933 | 0.9797 | 0.7080 | 0.8842 | 0.0915 |
| FAM84A     | 0.8109 | 1.0272 | 0.9128 | 0.7858 | 0.8842 | 0.0550 |
| RBM35A     | 0.8848 | 1.0465 | 0.8068 | 0.7989 | 0.8842 | 0.0574 |
| LEMD2      | 0.8369 | 1.0912 | 0.8206 | 0.7883 | 0.8843 | 0.0697 |
| MRPS18C    | 0.7611 | 1.3051 | 0.8049 | 0.6660 | 0.8843 | 0.1432 |
| MPP6       | 0.7323 | 1.1641 | 0.9039 | 0.7368 | 0.8843 | 0.1015 |
| FKBP10     | 0.8577 | 1.0453 | 0.8547 | 0.7795 | 0.8843 | 0.0566 |
| LOC644827  | 0.9643 | 0.8674 | 0.9051 | 0.8007 | 0.8844 | 0.0343 |
| LOC728635  | 0.7750 | 1.2460 | 0.8428 | 0.6738 | 0.8844 | 0.1254 |
| NFX1       | 0.7299 | 1.1077 | 1.0003 | 0.6996 | 0.8844 | 0.1006 |
| COMMD4     | 0.7083 | 1.2403 | 0.8456 | 0.7434 | 0.8844 | 0.1222 |
| ZC3HAV1    | 0.7448 | 1.2048 | 0.8867 | 0.7015 | 0.8844 | 0.1139 |
| TIFA       | 0.7905 | 1.0626 | 0.8191 | 0.8656 | 0.8845 | 0.0614 |
| PSTK       | 0.8063 | 1.0162 | 0.9110 | 0.8044 | 0.8845 | 0.0505 |
| KLHDC2     | 0.8433 | 1.0159 | 1.0022 | 0.6764 | 0.8845 | 0.0797 |
| LOC730455  | 0.7514 | 1.2078 | 0.8742 | 0.7046 | 0.8845 | 0.1135 |
| TM9SF1     | 0.8304 | 1.1878 | 0.7889 | 0.7309 | 0.8845 | 0.1031 |
| ZNF467     | 0.7875 | 1.1883 | 0.8373 | 0.7250 | 0.8845 | 0.1038 |
| MAP3K11    | 0.8552 | 1.0045 | 0.9528 | 0.7256 | 0.8845 | 0.0613 |
| ZFPL1      | 0.8377 | 0.9939 | 0.8815 | 0.8252 | 0.8846 | 0.0384 |
| TMEM181    | 0.8412 | 1.2011 | 0.8155 | 0.6806 | 0.8846 | 0.1112 |
| SNX27      | 0.8282 | 1.2164 | 0.8127 | 0.6810 | 0.8846 | 0.1154 |
| LOC1001298 | 0.9666 | 1.0123 | 0.8864 | 0.6738 | 0.8848 | 0.0750 |
| TCEB1      | 0.7325 | 1.0724 | 1.0581 | 0.6763 | 0.8848 | 0.1048 |

|            |        |        |        |        |        |        |
|------------|--------|--------|--------|--------|--------|--------|
| HIST1H3B   | 0.7982 | 0.9876 | 0.9610 | 0.7926 | 0.8849 | 0.0519 |
| MED14      | 0.7827 | 1.1293 | 0.8679 | 0.7595 | 0.8849 | 0.0848 |
| C17orf95   | 0.7431 | 1.2371 | 0.8622 | 0.6971 | 0.8849 | 0.1225 |
| LOC402175  | 0.7577 | 1.1519 | 0.9318 | 0.6982 | 0.8849 | 0.1019 |
| TMEM11     | 0.8292 | 1.0643 | 0.9736 | 0.6725 | 0.8849 | 0.0858 |
| LOC728945  | 0.7986 | 0.9996 | 0.9637 | 0.7779 | 0.8849 | 0.0565 |
| E2F1       | 0.6640 | 0.9673 | 1.0282 | 0.8804 | 0.8850 | 0.0797 |
| M6PRBP1    | 0.8062 | 1.0487 | 1.0417 | 0.6433 | 0.8850 | 0.0983 |
| RPAP2      | 0.6391 | 1.2518 | 0.8722 | 0.7768 | 0.8850 | 0.1313 |
| LOC652675  | 0.7743 | 0.9750 | 0.9085 | 0.8822 | 0.8850 | 0.0418 |
| CCNY       | 0.7563 | 1.1224 | 0.9478 | 0.7136 | 0.8850 | 0.0941 |
| DSTYK      | 0.7990 | 1.1839 | 0.8132 | 0.7443 | 0.8851 | 0.1007 |
| SLC30A1    | 0.7467 | 1.0860 | 0.9473 | 0.7605 | 0.8851 | 0.0811 |
| TYK2       | 0.8074 | 1.1967 | 0.7901 | 0.7464 | 0.8851 | 0.1046 |
| NR2C2      | 0.6452 | 1.2367 | 0.9366 | 0.7220 | 0.8851 | 0.1324 |
| LOC1001304 | 0.8164 | 0.8844 | 0.8586 | 0.9811 | 0.8851 | 0.0349 |
| C20orf45   | 0.7058 | 1.2830 | 0.8847 | 0.6671 | 0.8852 | 0.1408 |
| WDR73      | 0.7150 | 1.2440 | 0.8048 | 0.7770 | 0.8852 | 0.1211 |
| LOC1001280 | 0.8272 | 1.0355 | 0.8415 | 0.8367 | 0.8852 | 0.0502 |
| ARPC1A     | 0.7577 | 1.2290 | 0.8929 | 0.6614 | 0.8852 | 0.1240 |
| DPH1       | 0.8699 | 1.1039 | 0.8110 | 0.7562 | 0.8852 | 0.0765 |
| RAI1       | 0.8061 | 1.1578 | 0.8582 | 0.7190 | 0.8853 | 0.0953 |
| MED24      | 0.7927 | 1.2301 | 0.7857 | 0.7326 | 0.8853 | 0.1157 |
| GNL3       | 0.7136 | 1.2381 | 0.8555 | 0.7341 | 0.8853 | 0.1217 |
| STAG3L2    | 0.6861 | 1.2647 | 0.7666 | 0.8240 | 0.8853 | 0.1296 |
| POLR2E     | 0.8125 | 1.1000 | 0.8282 | 0.8006 | 0.8853 | 0.0718 |
| TMEM132A   | 1.0572 | 1.0680 | 0.7466 | 0.6696 | 0.8854 | 0.1036 |
| PDK2       | 0.8635 | 0.9995 | 0.8769 | 0.8016 | 0.8854 | 0.0414 |
| PMVK       | 1.0179 | 1.1915 | 0.7515 | 0.5807 | 0.8854 | 0.1360 |
| C20orf186  | 0.9554 | 0.9240 | 0.8737 | 0.7886 | 0.8854 | 0.0364 |
| KLHL21     | 0.8519 | 1.1599 | 0.8296 | 0.7005 | 0.8855 | 0.0974 |
| BSG        | 0.7170 | 1.3055 | 0.8876 | 0.6318 | 0.8855 | 0.1498 |
| LOC646210  | 0.8725 | 0.8872 | 0.8792 | 0.9030 | 0.8855 | 0.0066 |
| P2RY11     | 0.7537 | 1.1226 | 0.8559 | 0.8098 | 0.8855 | 0.0818 |
| KIAA0258   | 0.8642 | 0.9560 | 0.8546 | 0.8673 | 0.8855 | 0.0236 |
| LOC652874  | 0.9527 | 0.9255 | 0.8284 | 0.8356 | 0.8855 | 0.0314 |
| ZNF706     | 0.6887 | 1.1233 | 0.9597 | 0.7707 | 0.8856 | 0.0975 |
| LDLRAP1    | 0.9225 | 1.0598 | 0.7702 | 0.7901 | 0.8856 | 0.0672 |
| LOC652736  | 0.7971 | 0.9881 | 0.9317 | 0.8258 | 0.8857 | 0.0448 |
| KTN1       | 0.6944 | 1.0580 | 1.0668 | 0.7237 | 0.8857 | 0.1022 |
| LOC1001321 | 0.8644 | 0.9584 | 0.9795 | 0.7406 | 0.8857 | 0.0545 |
| PPP2R5E    | 0.7379 | 1.1651 | 1.0096 | 0.6303 | 0.8858 | 0.1226 |
| LOC651829  | 0.9012 | 0.8841 | 0.9583 | 0.7994 | 0.8858 | 0.0329 |
| NAGA       | 0.8794 | 1.0615 | 0.8495 | 0.7528 | 0.8858 | 0.0645 |
| KIAA0196   | 0.8204 | 1.1322 | 0.9230 | 0.6677 | 0.8858 | 0.0974 |
| C2CD2      | 0.8825 | 1.1442 | 0.8541 | 0.6626 | 0.8858 | 0.0990 |

|            |        |        |        |        |        |        |
|------------|--------|--------|--------|--------|--------|--------|
| PRR13      | 0.7330 | 1.1834 | 0.9502 | 0.6767 | 0.8858 | 0.1154 |
| MAPK13     | 0.8049 | 1.2090 | 0.8466 | 0.6830 | 0.8859 | 0.1132 |
| CBLN3      | 0.8246 | 1.0861 | 0.9407 | 0.6922 | 0.8859 | 0.0838 |
| PTAR1      | 0.6978 | 1.2176 | 0.9717 | 0.6564 | 0.8859 | 0.1309 |
| DDX19A     | 0.7862 | 1.1210 | 0.8585 | 0.7779 | 0.8859 | 0.0804 |
| TRA1P2     | 0.8161 | 1.0400 | 0.9038 | 0.7838 | 0.8859 | 0.0573 |
| UQCRC2     | 0.7916 | 0.9473 | 1.3431 | 0.4617 | 0.8859 | 0.1829 |
| LOC645317  | 0.6411 | 1.0651 | 1.0795 | 0.7582 | 0.8860 | 0.1102 |
| ZDHHC4     | 0.8029 | 1.1966 | 0.8457 | 0.6990 | 0.8861 | 0.1080 |
| SLC35C2    | 0.7928 | 1.1152 | 0.8546 | 0.7818 | 0.8861 | 0.0780 |
| LOC572558  | 0.7292 | 0.9836 | 1.0834 | 0.7482 | 0.8861 | 0.0876 |
| IFITM3     | 0.7368 | 1.2238 | 0.8972 | 0.6867 | 0.8861 | 0.1212 |
| LOC1001288 | 0.8490 | 1.0001 | 0.8252 | 0.8702 | 0.8861 | 0.0391 |
| ZNF324B    | 0.7414 | 1.2237 | 0.8494 | 0.7300 | 0.8862 | 0.1157 |
| HIST2H3D   | 0.7844 | 1.0820 | 0.9040 | 0.7743 | 0.8862 | 0.0716 |
| FASTK      | 0.7344 | 1.2135 | 0.9013 | 0.6955 | 0.8862 | 0.1179 |
| CCT3       | 0.6141 | 1.4134 | 0.9034 | 0.6141 | 0.8862 | 0.1885 |
| LOC643918  | 0.8261 | 0.9799 | 0.8787 | 0.8604 | 0.8863 | 0.0331 |
| ZNF213     | 0.8145 | 1.0542 | 0.9292 | 0.7473 | 0.8863 | 0.0674 |
| LOC650938  | 0.9764 | 0.9179 | 0.8515 | 0.7994 | 0.8863 | 0.0386 |
| RFP        | 0.7755 | 1.1650 | 0.8207 | 0.7840 | 0.8863 | 0.0934 |
| TMEM107    | 0.7951 | 0.9521 | 0.9936 | 0.8046 | 0.8863 | 0.0507 |
| KDELR3     | 0.7740 | 1.0887 | 0.9518 | 0.7308 | 0.8863 | 0.0827 |
| BTBD7      | 0.8138 | 1.1049 | 0.8614 | 0.7654 | 0.8864 | 0.0754 |
| DPP7       | 0.7145 | 1.2066 | 0.9131 | 0.7115 | 0.8864 | 0.1167 |
| IFRD1      | 0.8702 | 1.0426 | 0.8513 | 0.7815 | 0.8864 | 0.0554 |
| OPA1       | 0.7350 | 1.1562 | 0.8986 | 0.7560 | 0.8864 | 0.0970 |
| CCDC106    | 0.7232 | 1.2239 | 0.9259 | 0.6728 | 0.8864 | 0.1251 |
| NCR3       | 0.8793 | 0.9518 | 0.8895 | 0.8252 | 0.8864 | 0.0259 |
| TMEM80     | 0.8072 | 1.1684 | 0.7797 | 0.7904 | 0.8864 | 0.0942 |
| PPP2R3B    | 0.8120 | 0.9476 | 0.9444 | 0.8418 | 0.8865 | 0.0349 |
| C22orf26   | 0.8182 | 0.9573 | 0.9250 | 0.8454 | 0.8865 | 0.0327 |
| LOC1001291 | 0.8437 | 1.0256 | 0.8871 | 0.7896 | 0.8865 | 0.0505 |
| AP1S1      | 0.7675 | 1.2055 | 0.8636 | 0.7097 | 0.8866 | 0.1109 |
| MUC5AC     | 0.8510 | 0.9792 | 0.8640 | 0.8522 | 0.8866 | 0.0310 |
| LOC401152  | 0.8954 | 1.0223 | 0.7622 | 0.8668 | 0.8867 | 0.0535 |
| ENAH       | 0.8531 | 0.9943 | 0.8964 | 0.8030 | 0.8867 | 0.0406 |
| EIF4A3     | 0.7120 | 1.1942 | 0.9779 | 0.6629 | 0.8867 | 0.1236 |
| DLG3       | 0.8742 | 1.0580 | 0.8441 | 0.7708 | 0.8868 | 0.0611 |
| LOC652634  | 0.8655 | 0.9252 | 0.9180 | 0.8383 | 0.8868 | 0.0209 |
| IRF1       | 0.6813 | 1.1073 | 0.9700 | 0.7886 | 0.8868 | 0.0946 |
| LOC728004  | 0.8205 | 0.9625 | 0.9404 | 0.8237 | 0.8868 | 0.0376 |
| LOC1001287 | 0.8019 | 0.9681 | 0.9675 | 0.8097 | 0.8868 | 0.0468 |
| LOC648370  | 0.8463 | 1.0095 | 0.9398 | 0.7516 | 0.8868 | 0.0561 |
| INTS9      | 0.7854 | 1.1566 | 0.8699 | 0.7355 | 0.8868 | 0.0941 |
| ZNF786     | 0.7132 | 1.2287 | 0.8128 | 0.7927 | 0.8869 | 0.1160 |



|            |        |        |        |        |        |        |
|------------|--------|--------|--------|--------|--------|--------|
| TMEM201    | 0.8316 | 0.9959 | 0.9206 | 0.7994 | 0.8869 | 0.0445 |
| NRIP2      | 0.9126 | 0.9084 | 0.8624 | 0.8642 | 0.8869 | 0.0137 |
| FAM149A    | 0.8438 | 0.9342 | 0.9215 | 0.8481 | 0.8869 | 0.0238 |
| IGF2AS     | 0.8191 | 0.8972 | 0.8594 | 0.9719 | 0.8869 | 0.0325 |
| MGC48628   | 0.8372 | 0.8362 | 1.0027 | 0.8718 | 0.8870 | 0.0395 |
| LAP3       | 0.8829 | 1.0905 | 0.9808 | 0.5939 | 0.8870 | 0.1065 |
| GADD45B    | 0.7835 | 1.1429 | 0.7809 | 0.8409 | 0.8870 | 0.0864 |
| ZBTB39     | 0.8976 | 1.0024 | 0.8173 | 0.8312 | 0.8871 | 0.0422 |
| DMBX1      | 0.8586 | 1.0170 | 0.8849 | 0.7880 | 0.8871 | 0.0479 |
| LOC389199  | 0.7803 | 0.9741 | 0.9300 | 0.8641 | 0.8871 | 0.0422 |
| ZNF2       | 0.8069 | 1.0505 | 0.8627 | 0.8285 | 0.8872 | 0.0557 |
| LOC646697  | 0.7176 | 0.9876 | 0.9484 | 0.8952 | 0.8872 | 0.0596 |
| MEF2B      | 0.9161 | 0.8472 | 0.9419 | 0.8436 | 0.8872 | 0.0247 |
| LOC1001289 | 0.6689 | 1.2145 | 0.9438 | 0.7216 | 0.8872 | 0.1243 |
| MRPS18A    | 0.7796 | 1.1905 | 0.8636 | 0.7152 | 0.8872 | 0.1056 |
| TP53BP2    | 0.8097 | 1.1759 | 0.8677 | 0.6957 | 0.8872 | 0.1026 |
| CXXC6      | 0.8186 | 1.0324 | 0.9006 | 0.7978 | 0.8874 | 0.0532 |
| FTSJD2     | 0.8168 | 1.1348 | 0.7654 | 0.8326 | 0.8874 | 0.0837 |
| BANF1      | 0.6752 | 1.2451 | 0.8842 | 0.7451 | 0.8874 | 0.1269 |
| LOC727826  | 0.8415 | 0.9380 | 1.0897 | 0.6804 | 0.8874 | 0.0859 |
| IQGAP1     | 0.8199 | 1.0673 | 0.9355 | 0.7270 | 0.8874 | 0.0736 |
| FPR1       | 0.8394 | 0.9655 | 0.8231 | 0.9217 | 0.8874 | 0.0338 |
| CDC5L      | 0.8148 | 1.0369 | 1.0369 | 0.6614 | 0.8875 | 0.0918 |
| SHFM1      | 0.7906 | 1.1638 | 0.9516 | 0.6443 | 0.8876 | 0.1114 |
| DENND4B    | 0.8367 | 1.1332 | 0.7826 | 0.7978 | 0.8876 | 0.0827 |
| SLMO1      | 0.8002 | 1.0427 | 0.8615 | 0.8459 | 0.8876 | 0.0533 |
| MST4       | 0.7931 | 1.0041 | 1.0653 | 0.6878 | 0.8876 | 0.0885 |
| SEC31A     | 0.8218 | 1.1214 | 0.9573 | 0.6499 | 0.8876 | 0.1001 |
| MARVELD3   | 0.7637 | 1.1039 | 0.8742 | 0.8085 | 0.8876 | 0.0756 |
| MUS81      | 0.7697 | 1.3120 | 0.8566 | 0.6122 | 0.8876 | 0.1502 |
| LOC1001285 | 0.7486 | 1.0893 | 0.8715 | 0.8411 | 0.8876 | 0.0721 |
| GRHPR      | 0.7794 | 1.1850 | 0.9141 | 0.6721 | 0.8877 | 0.1108 |
| THAP7      | 0.7435 | 1.0932 | 0.9308 | 0.7831 | 0.8877 | 0.0795 |
| SIGIRR     | 0.7705 | 1.1860 | 0.8536 | 0.7406 | 0.8877 | 0.1023 |
| LOC441528  | 0.8181 | 0.8859 | 0.9724 | 0.8744 | 0.8877 | 0.0319 |
| CBX6       | 0.7314 | 1.2002 | 1.0405 | 0.5788 | 0.8877 | 0.1417 |
| FLJ35767   | 0.8038 | 0.9659 | 0.9129 | 0.8684 | 0.8877 | 0.0343 |
| CATSPER2P1 | 0.7688 | 1.0220 | 0.8851 | 0.8752 | 0.8878 | 0.0519 |
| LOC642513  | 0.9675 | 0.9482 | 0.8826 | 0.7527 | 0.8878 | 0.0485 |
| KIAA0141   | 0.9714 | 0.9713 | 0.9151 | 0.6935 | 0.8878 | 0.0661 |
| LOC728138  | 0.9049 | 1.1156 | 0.8725 | 0.6587 | 0.8879 | 0.0935 |
| USP10      | 0.7971 | 1.1733 | 0.8828 | 0.6988 | 0.8880 | 0.1022 |
| ARIH2      | 0.6898 | 1.2509 | 0.8747 | 0.7366 | 0.8880 | 0.1272 |
| LGALS2     | 0.7798 | 0.9705 | 0.9270 | 0.8752 | 0.8881 | 0.0410 |
| PHTF1      | 0.8432 | 0.9358 | 0.9783 | 0.7953 | 0.8881 | 0.0419 |
| AMY1A      | 0.7840 | 0.9510 | 0.9761 | 0.8415 | 0.8882 | 0.0454 |

|            |        |        |        |        |        |        |
|------------|--------|--------|--------|--------|--------|--------|
| PQLC1      | 0.7178 | 1.1431 | 0.9352 | 0.7566 | 0.8882 | 0.0973 |
| UTP23      | 0.6845 | 1.0560 | 1.0092 | 0.8029 | 0.8882 | 0.0874 |
| RBL1       | 0.8146 | 1.0270 | 0.8992 | 0.8121 | 0.8882 | 0.0505 |
| RASSF2     | 0.8461 | 1.0782 | 0.8982 | 0.7305 | 0.8882 | 0.0724 |
| LOC1001282 | 0.8394 | 0.9877 | 0.8866 | 0.8393 | 0.8883 | 0.0350 |
| ZNF444     | 0.9575 | 1.0321 | 0.8826 | 0.6809 | 0.8883 | 0.0756 |
| SNORD34    | 0.7648 | 0.9908 | 1.0421 | 0.7556 | 0.8883 | 0.0747 |
| ZDHHC12    | 0.8872 | 1.1250 | 0.9061 | 0.6353 | 0.8884 | 0.1001 |
| CDCP1      | 0.6906 | 1.1709 | 0.8714 | 0.8208 | 0.8884 | 0.1016 |
| STRAP      | 0.7043 | 1.0841 | 1.1224 | 0.6427 | 0.8884 | 0.1249 |
| ZNF652     | 0.7152 | 1.1967 | 0.9369 | 0.7048 | 0.8884 | 0.1159 |
| ATP10A     | 0.7723 | 1.0726 | 0.9447 | 0.7641 | 0.8884 | 0.0742 |
| C7orf54    | 0.8488 | 1.0911 | 0.7226 | 0.8911 | 0.8884 | 0.0765 |
| PRKX       | 0.8852 | 1.1060 | 0.8380 | 0.7244 | 0.8884 | 0.0800 |
| LOC729505  | 0.8098 | 0.9053 | 0.9695 | 0.8691 | 0.8884 | 0.0334 |
| COPS8      | 0.8792 | 1.0373 | 0.9780 | 0.6593 | 0.8885 | 0.0831 |
| RASA1      | 0.7947 | 1.1426 | 0.8894 | 0.7272 | 0.8885 | 0.0910 |
| RNF135     | 0.8473 | 1.0382 | 0.9246 | 0.7439 | 0.8885 | 0.0621 |
| GSPT1      | 0.7871 | 1.1649 | 0.9619 | 0.6401 | 0.8885 | 0.1132 |
| LOC647606  | 0.7755 | 0.8321 | 1.0807 | 0.8660 | 0.8886 | 0.0667 |
| TICAM1     | 0.7012 | 1.1408 | 1.1098 | 0.6025 | 0.8886 | 0.1383 |
| C11orf10   | 0.8327 | 1.0929 | 0.9294 | 0.6993 | 0.8886 | 0.0829 |
| RELL1      | 0.8391 | 1.0098 | 0.9998 | 0.7057 | 0.8886 | 0.0724 |
| CHMP2A     | 0.6807 | 1.3050 | 0.9428 | 0.6259 | 0.8886 | 0.1551 |
| GTF3C5     | 0.7646 | 1.2287 | 0.8449 | 0.7163 | 0.8886 | 0.1164 |
| HSP90B1    | 0.7454 | 1.2163 | 0.9644 | 0.6285 | 0.8886 | 0.1295 |
| LOC645086  | 0.8058 | 1.0262 | 0.9133 | 0.8092 | 0.8886 | 0.0522 |
| ZHX3       | 0.7719 | 1.1534 | 0.8970 | 0.7324 | 0.8887 | 0.0950 |
| LOC651589  | 0.8682 | 0.8560 | 0.8930 | 0.9375 | 0.8887 | 0.0180 |
| B3GALTL    | 0.8088 | 1.0377 | 0.8394 | 0.8689 | 0.8887 | 0.0512 |
| BHLHA15    | 0.6996 | 0.9247 | 0.9680 | 0.9627 | 0.8888 | 0.0638 |
| LOC645609  | 0.6538 | 1.3295 | 0.8688 | 0.7030 | 0.8888 | 0.1539 |
| GLCCI1     | 0.8047 | 1.0009 | 0.9253 | 0.8242 | 0.8888 | 0.0458 |
| TNFRSF18   | 0.9005 | 0.9387 | 0.8724 | 0.8438 | 0.8888 | 0.0203 |
| RBM4B      | 0.7327 | 1.1991 | 0.8886 | 0.7350 | 0.8889 | 0.1097 |
| USF1       | 0.6415 | 1.2580 | 1.0196 | 0.6363 | 0.8889 | 0.1523 |
| PPAPDC2    | 0.9318 | 1.1619 | 0.8457 | 0.6161 | 0.8889 | 0.1128 |
| ABHD15     | 0.8159 | 0.9689 | 0.9367 | 0.8340 | 0.8889 | 0.0377 |
| KIAA0907   | 0.8510 | 1.1192 | 0.8610 | 0.7244 | 0.8889 | 0.0828 |
| TMEM200B   | 0.9289 | 1.0620 | 0.8960 | 0.6688 | 0.8889 | 0.0817 |
| POLDIP2    | 0.7015 | 1.1338 | 0.9399 | 0.7805 | 0.8890 | 0.0955 |
| KIAA0586   | 0.8406 | 1.1482 | 0.9020 | 0.6649 | 0.8890 | 0.1000 |
| MRPL43     | 0.7968 | 1.2714 | 0.8283 | 0.6593 | 0.8890 | 0.1327 |
| CEP72      | 0.7204 | 1.0516 | 0.9084 | 0.8756 | 0.8890 | 0.0680 |
| LOC654254  | 0.7533 | 1.2068 | 0.9416 | 0.6543 | 0.8890 | 0.1215 |
| INTS5      | 0.7326 | 1.1559 | 0.9368 | 0.7308 | 0.8890 | 0.1012 |

|            |        |        |        |        |        |        |
|------------|--------|--------|--------|--------|--------|--------|
| TOR1AIP2   | 0.6295 | 1.1301 | 1.0282 | 0.7683 | 0.8891 | 0.1153 |
| ASPHD2     | 0.7749 | 0.9854 | 0.8973 | 0.8987 | 0.8891 | 0.0433 |
| SLC16A14   | 0.8775 | 0.9730 | 0.9702 | 0.7356 | 0.8891 | 0.0558 |
| ARHGEF16   | 0.8370 | 1.0904 | 0.8965 | 0.7325 | 0.8891 | 0.0752 |
| KIAA1310   | 0.7747 | 1.2660 | 0.8247 | 0.6909 | 0.8891 | 0.1286 |
| ZNF816A    | 0.7992 | 1.1906 | 0.9264 | 0.6402 | 0.8891 | 0.1163 |
| EBAG9      | 0.7357 | 1.0659 | 1.0511 | 0.7038 | 0.8891 | 0.0981 |
| ZNF16      | 0.8642 | 1.0399 | 0.8739 | 0.7786 | 0.8891 | 0.0546 |
| ARHGAP11A  | 0.8707 | 0.9924 | 0.8770 | 0.8166 | 0.8892 | 0.0370 |
| EIF2AK4    | 0.7546 | 1.2226 | 0.8090 | 0.7704 | 0.8892 | 0.1117 |
| DHFRL1     | 0.7830 | 1.1085 | 0.8502 | 0.8149 | 0.8892 | 0.0744 |
| VAMP8      | 0.7290 | 1.2590 | 0.9086 | 0.6602 | 0.8892 | 0.1339 |
| OR9A4      | 0.7495 | 1.0205 | 0.9903 | 0.7965 | 0.8892 | 0.0680 |
| LOC1001312 | 0.5496 | 1.0436 | 1.2781 | 0.6856 | 0.8892 | 0.1663 |
| LOC648609  | 0.8477 | 0.9354 | 0.9628 | 0.8111 | 0.8892 | 0.0358 |
| RB1CC1     | 0.8775 | 1.0814 | 0.9138 | 0.6842 | 0.8892 | 0.0815 |
| SPCS1      | 0.7083 | 1.1434 | 0.9969 | 0.7085 | 0.8893 | 0.1086 |
| LOC1001340 | 0.8739 | 1.0320 | 0.8688 | 0.7823 | 0.8893 | 0.0520 |
| SFRS12     | 0.7959 | 1.0095 | 0.9329 | 0.8189 | 0.8893 | 0.0500 |
| ZNF37B     | 0.8444 | 0.9564 | 0.9375 | 0.8191 | 0.8894 | 0.0339 |
| GALR2      | 0.8275 | 1.1070 | 0.8341 | 0.7888 | 0.8894 | 0.0732 |
| ZNF320     | 0.7252 | 1.1840 | 0.8933 | 0.7550 | 0.8894 | 0.1048 |
| LOC730202  | 0.7007 | 1.2416 | 0.7931 | 0.8222 | 0.8894 | 0.1202 |
| C19orf28   | 0.7660 | 1.1396 | 0.8861 | 0.7660 | 0.8894 | 0.0881 |
| C1orf77    | 0.6648 | 1.2576 | 0.8473 | 0.7881 | 0.8895 | 0.1285 |
| NXT2       | 0.8325 | 0.9202 | 1.0871 | 0.7182 | 0.8895 | 0.0778 |
| MMGT1      | 0.8134 | 1.0871 | 0.9588 | 0.6988 | 0.8895 | 0.0846 |
| SIRT7      | 0.8085 | 1.0078 | 0.9369 | 0.8048 | 0.8895 | 0.0500 |
| FLJ40473   | 0.8752 | 1.0783 | 0.7541 | 0.8506 | 0.8895 | 0.0681 |
| TDRD3      | 0.7348 | 0.9962 | 0.9753 | 0.8521 | 0.8896 | 0.0606 |
| SMAD1      | 0.8384 | 1.0493 | 0.8936 | 0.7771 | 0.8896 | 0.0583 |
| EIF2C3     | 0.8277 | 0.9567 | 0.9058 | 0.8682 | 0.8896 | 0.0275 |
| NOMO2      | 0.8702 | 1.0878 | 0.9688 | 0.6319 | 0.8897 | 0.0968 |
| LOC732419  | 0.7522 | 1.0792 | 0.9608 | 0.7666 | 0.8897 | 0.0791 |
| ANKRA2     | 0.7967 | 1.2190 | 0.8083 | 0.7349 | 0.8897 | 0.1109 |
| PLOD1      | 0.8733 | 1.3396 | 0.7184 | 0.6277 | 0.8897 | 0.1583 |
| MIR564     | 0.8161 | 1.0973 | 0.9352 | 0.7103 | 0.8897 | 0.0831 |
| QRFPR      | 0.7365 | 1.1084 | 1.0052 | 0.7090 | 0.8898 | 0.0989 |
| PABPC1L    | 0.7657 | 1.1420 | 0.7832 | 0.8682 | 0.8898 | 0.0870 |
| C1orf144   | 0.6408 | 1.1837 | 0.9197 | 0.8149 | 0.8898 | 0.1136 |
| ZNF12      | 0.8480 | 0.9971 | 0.9408 | 0.7734 | 0.8898 | 0.0495 |
| FGFR1OP    | 0.8103 | 1.1362 | 0.8499 | 0.7630 | 0.8899 | 0.0840 |
| ZMYND15    | 0.8354 | 1.0816 | 0.9409 | 0.7016 | 0.8899 | 0.0805 |
| KBTBD6     | 0.6736 | 1.0565 | 0.9888 | 0.8406 | 0.8899 | 0.0850 |
| KDM4D      | 0.8789 | 0.9572 | 0.9350 | 0.7885 | 0.8899 | 0.0376 |
| PLA2G15    | 0.8904 | 1.0812 | 0.8399 | 0.7483 | 0.8899 | 0.0702 |

|            |        |        |        |        |        |        |
|------------|--------|--------|--------|--------|--------|--------|
| LOC730324  | 0.6623 | 1.2968 | 0.9573 | 0.6435 | 0.8900 | 0.1535 |
| MBD6       | 0.8896 | 1.0786 | 0.7569 | 0.8348 | 0.8900 | 0.0685 |
| STAU2      | 0.9129 | 1.1418 | 0.7693 | 0.7360 | 0.8900 | 0.0923 |
| REM2       | 0.8463 | 1.0269 | 0.9385 | 0.7483 | 0.8900 | 0.0599 |
| NDUFA8     | 0.6883 | 1.2002 | 1.0490 | 0.6226 | 0.8900 | 0.1395 |
| LOC729366  | 0.7773 | 1.0351 | 0.9808 | 0.7670 | 0.8900 | 0.0690 |
| LOC647346  | 0.8179 | 1.0541 | 0.9074 | 0.7809 | 0.8901 | 0.0608 |
| LOC643717  | 0.8040 | 0.8712 | 0.9920 | 0.8932 | 0.8901 | 0.0389 |
| HNF1B      | 0.8188 | 1.0722 | 0.8471 | 0.8224 | 0.8901 | 0.0610 |
| EIF4B      | 0.8663 | 1.0191 | 0.9244 | 0.7507 | 0.8901 | 0.0561 |
| SLC39A3    | 0.7708 | 1.1667 | 0.8524 | 0.7707 | 0.8901 | 0.0942 |
| LOC728031  | 0.7077 | 1.1116 | 1.0711 | 0.6702 | 0.8901 | 0.1167 |
| LOC389641  | 0.7304 | 1.1658 | 1.0013 | 0.6632 | 0.8902 | 0.1174 |
| LOC400558  | 0.9125 | 0.9138 | 0.9445 | 0.7901 | 0.8902 | 0.0342 |
| RFX1       | 0.8749 | 1.0172 | 0.8813 | 0.7876 | 0.8902 | 0.0474 |
| UPF3A      | 0.8379 | 1.1528 | 0.8514 | 0.7188 | 0.8902 | 0.0925 |
| PPT1       | 0.6988 | 1.0083 | 1.1361 | 0.7177 | 0.8902 | 0.1083 |
| TRPM1      | 0.9083 | 0.9361 | 0.8613 | 0.8553 | 0.8902 | 0.0193 |
| AKAP1      | 0.8340 | 0.9968 | 0.9933 | 0.7369 | 0.8903 | 0.0637 |
| SCARNA13   | 0.7467 | 0.9409 | 0.9650 | 0.9084 | 0.8903 | 0.0492 |
| EIF1       | 0.7628 | 1.1393 | 1.0079 | 0.6511 | 0.8903 | 0.1115 |
| LOC647805  | 0.9078 | 0.8576 | 0.9694 | 0.8264 | 0.8903 | 0.0312 |
| NT5DC1     | 0.9337 | 1.0715 | 0.8770 | 0.6790 | 0.8903 | 0.0814 |
| PPM1A      | 0.5941 | 1.2397 | 0.9508 | 0.7766 | 0.8903 | 0.1374 |
| C12orf47   | 0.7644 | 1.1940 | 1.0045 | 0.5984 | 0.8903 | 0.1311 |
| LSM11      | 0.7764 | 0.9826 | 0.9093 | 0.8931 | 0.8904 | 0.0427 |
| PRDX5      | 0.7037 | 1.2223 | 0.9176 | 0.7178 | 0.8904 | 0.1209 |
| RENBP      | 0.7670 | 1.0142 | 0.8616 | 0.9187 | 0.8904 | 0.0518 |
| LOC152586  | 0.7487 | 1.0361 | 0.9326 | 0.8442 | 0.8904 | 0.0614 |
| SERTAD2    | 0.7640 | 1.1413 | 0.9579 | 0.6984 | 0.8904 | 0.1002 |
| LOC729930  | 0.7696 | 0.9158 | 0.9825 | 0.8940 | 0.8905 | 0.0445 |
| CTBP2      | 0.7651 | 1.0228 | 0.9842 | 0.7899 | 0.8905 | 0.0659 |
| CTRL       | 0.8309 | 0.9221 | 0.9250 | 0.8839 | 0.8905 | 0.0220 |
| RSAD1      | 0.8139 | 1.0466 | 0.9200 | 0.7815 | 0.8905 | 0.0599 |
| LOC400721  | 0.7282 | 1.2534 | 0.8820 | 0.6985 | 0.8905 | 0.1275 |
| TMEM117    | 0.8190 | 1.0598 | 0.9794 | 0.7040 | 0.8906 | 0.0798 |
| PLAT       | 0.8816 | 0.9334 | 0.8605 | 0.8867 | 0.8906 | 0.0154 |
| DEF6       | 0.7761 | 1.0115 | 0.8539 | 0.9211 | 0.8906 | 0.0500 |
| LOC1001339 | 0.7778 | 1.0962 | 0.8256 | 0.8631 | 0.8907 | 0.0707 |
| TMEM1      | 0.8408 | 1.0122 | 0.9250 | 0.7847 | 0.8907 | 0.0497 |
| PDLIM7     | 0.8132 | 1.0295 | 0.9185 | 0.8016 | 0.8907 | 0.0532 |
| MAP3K7IP1  | 0.7973 | 1.1081 | 0.8564 | 0.8010 | 0.8907 | 0.0737 |
| SLC46A3    | 0.7650 | 1.0804 | 0.8701 | 0.8475 | 0.8907 | 0.0671 |
| HS6ST2     | 0.8485 | 1.0107 | 0.9272 | 0.7767 | 0.8908 | 0.0504 |
| GLE1       | 0.8058 | 1.1717 | 0.8533 | 0.7323 | 0.8908 | 0.0969 |
| SPIN3      | 0.8082 | 1.1568 | 0.9217 | 0.6765 | 0.8908 | 0.1018 |

|            |        |        |        |        |        |        |
|------------|--------|--------|--------|--------|--------|--------|
| SLC35F1    | 0.7483 | 1.0752 | 0.9158 | 0.8240 | 0.8908 | 0.0703 |
| GAGE2B     | 0.7947 | 1.1683 | 0.9464 | 0.6539 | 0.8908 | 0.1101 |
| RAB3D      | 0.8223 | 0.9681 | 0.8797 | 0.8933 | 0.8909 | 0.0300 |
| LOC253820  | 0.9324 | 0.8867 | 0.8532 | 0.8912 | 0.8909 | 0.0162 |
| USP6NL     | 0.8533 | 1.0877 | 0.8601 | 0.7624 | 0.8909 | 0.0693 |
| LOC441054  | 0.8610 | 0.9611 | 0.8934 | 0.8480 | 0.8909 | 0.0253 |
| LSM12      | 0.7078 | 1.1761 | 0.9561 | 0.7235 | 0.8909 | 0.1107 |
| C8orf33    | 0.7933 | 1.1986 | 0.7938 | 0.7779 | 0.8909 | 0.1026 |
| DHPS       | 0.8102 | 1.1842 | 0.8703 | 0.6990 | 0.8909 | 0.1040 |
| LOC1001347 | 0.8524 | 0.9217 | 0.9192 | 0.8707 | 0.8910 | 0.0174 |
| LASS2      | 0.7695 | 1.1991 | 0.9817 | 0.6137 | 0.8910 | 0.1274 |
| LOC729085  | 0.8351 | 0.9896 | 0.9742 | 0.7650 | 0.8910 | 0.0545 |
| TMEM187    | 0.8424 | 1.2913 | 0.8193 | 0.6110 | 0.8910 | 0.1432 |
| RNF41      | 0.8036 | 1.2265 | 0.8754 | 0.6586 | 0.8910 | 0.1206 |
| ZC3H8      | 0.7993 | 1.0408 | 0.9690 | 0.7551 | 0.8910 | 0.0679 |
| C17orf41   | 0.7995 | 1.0154 | 0.8864 | 0.8629 | 0.8911 | 0.0453 |
| MGC10997   | 0.8169 | 1.0677 | 0.9758 | 0.7038 | 0.8911 | 0.0811 |
| HNRNPA3P1  | 0.6808 | 1.0568 | 1.0249 | 0.8018 | 0.8911 | 0.0902 |
| LOC646981  | 0.6850 | 1.0717 | 1.0262 | 0.7815 | 0.8911 | 0.0937 |
| RPGRIP1L   | 0.8287 | 0.9742 | 0.8860 | 0.8757 | 0.8911 | 0.0304 |
| LPGAT1     | 0.8218 | 1.0569 | 0.8730 | 0.8130 | 0.8912 | 0.0568 |
| ATP5A1     | 0.7055 | 1.2004 | 0.9992 | 0.6596 | 0.8912 | 0.1276 |
| RNF114     | 0.7068 | 1.2234 | 0.9441 | 0.6906 | 0.8912 | 0.1250 |
| TSR1       | 0.6664 | 1.2951 | 0.9091 | 0.6944 | 0.8912 | 0.1451 |
| GATAD1     | 0.7565 | 1.1241 | 0.8951 | 0.7892 | 0.8912 | 0.0831 |
| NEK4       | 0.6830 | 1.1539 | 0.9389 | 0.7893 | 0.8913 | 0.1021 |
| HMBOX1     | 0.6687 | 1.2408 | 0.8227 | 0.8330 | 0.8913 | 0.1224 |
| MECR       | 0.8176 | 1.0482 | 0.9491 | 0.7502 | 0.8913 | 0.0667 |
| DIAPH2     | 0.8010 | 1.0458 | 0.9209 | 0.7976 | 0.8913 | 0.0589 |
| FKBP1A     | 0.6991 | 1.4018 | 0.7974 | 0.6671 | 0.8913 | 0.1724 |
| SNORD99    | 0.8045 | 1.0538 | 0.9482 | 0.7589 | 0.8914 | 0.0675 |
| LOC649977  | 0.8838 | 0.9430 | 0.8723 | 0.8665 | 0.8914 | 0.0176 |
| CCDC109B   | 0.7462 | 0.9499 | 0.8745 | 0.9952 | 0.8914 | 0.0545 |
| LOC653079  | 0.6132 | 1.1320 | 1.1615 | 0.6591 | 0.8915 | 0.1478 |
| LOC644046  | 0.8336 | 0.9020 | 1.0145 | 0.8158 | 0.8915 | 0.0450 |
| B3GNT8     | 0.8542 | 0.9685 | 0.8881 | 0.8550 | 0.8915 | 0.0269 |
| FOXO1      | 0.7778 | 1.0865 | 0.9422 | 0.7594 | 0.8915 | 0.0769 |
| FAM72B     | 0.8423 | 1.0292 | 0.8757 | 0.8188 | 0.8915 | 0.0474 |
| SMAP1      | 0.9188 | 0.9540 | 0.9384 | 0.7550 | 0.8916 | 0.0461 |
| EDEM2      | 0.7351 | 1.2255 | 0.9059 | 0.6998 | 0.8916 | 0.1200 |
| FOXRED2    | 0.7398 | 1.1570 | 0.8783 | 0.7912 | 0.8916 | 0.0930 |
| ROBO3      | 0.7863 | 1.1303 | 0.8745 | 0.7754 | 0.8916 | 0.0826 |
| COX6B1     | 0.7129 | 1.2962 | 0.8878 | 0.6696 | 0.8916 | 0.1429 |
| GSTP1      | 0.7632 | 1.0470 | 0.8204 | 0.9360 | 0.8916 | 0.0630 |
| TEX264     | 0.7498 | 1.2768 | 0.8783 | 0.6618 | 0.8917 | 0.1358 |
| C22orf39   | 0.7079 | 1.1681 | 0.9599 | 0.7308 | 0.8917 | 0.1083 |

|            |        |        |        |        |        |        |
|------------|--------|--------|--------|--------|--------|--------|
| HRIHFB2122 | 1.0009 | 0.9353 | 0.9513 | 0.6793 | 0.8917 | 0.0722 |
| GRM2       | 0.7877 | 1.0833 | 0.8500 | 0.8458 | 0.8917 | 0.0654 |
| ZNF524     | 0.8147 | 1.0893 | 0.9112 | 0.7517 | 0.8917 | 0.0736 |
| NEO1       | 0.6824 | 1.1430 | 0.9517 | 0.7899 | 0.8917 | 0.1004 |
| COQ2       | 0.6646 | 1.1037 | 0.9912 | 0.8075 | 0.8917 | 0.0973 |
| WNT3       | 0.7925 | 0.9619 | 0.9309 | 0.8818 | 0.8918 | 0.0370 |
| CCNK       | 0.6456 | 1.3808 | 0.8307 | 0.7101 | 0.8918 | 0.1674 |
| MID2       | 0.7903 | 1.1427 | 0.8774 | 0.7569 | 0.8918 | 0.0874 |
| E4F1       | 0.7989 | 1.0789 | 0.8811 | 0.8084 | 0.8918 | 0.0650 |
| GPR160     | 0.7272 | 1.1172 | 1.0247 | 0.6985 | 0.8919 | 0.1053 |
| LOC440396  | 0.8021 | 0.9417 | 0.9369 | 0.8868 | 0.8919 | 0.0324 |
| COMMD2     | 0.7010 | 1.0935 | 1.0777 | 0.6958 | 0.8920 | 0.1118 |
| LOC730809  | 0.7918 | 1.1090 | 0.8614 | 0.8059 | 0.8920 | 0.0739 |
| GPS1       | 0.6862 | 1.1876 | 0.9098 | 0.7845 | 0.8920 | 0.1086 |
| TMEM121    | 0.8117 | 1.0057 | 0.8358 | 0.9150 | 0.8921 | 0.0438 |
| C10orf46   | 0.8305 | 1.0207 | 0.9278 | 0.7894 | 0.8921 | 0.0518 |
| LOC1001343 | 0.8042 | 0.9835 | 0.9197 | 0.8609 | 0.8921 | 0.0385 |
| LRRC49     | 0.7403 | 1.1493 | 0.9549 | 0.7239 | 0.8921 | 0.1006 |
| LOC441662  | 0.8160 | 0.9885 | 0.9346 | 0.8295 | 0.8922 | 0.0416 |
| THAP1      | 0.7471 | 1.1264 | 0.9713 | 0.7238 | 0.8922 | 0.0960 |
| LOC730077  | 0.8683 | 1.0425 | 0.8350 | 0.8231 | 0.8922 | 0.0510 |
| PLAA       | 0.7723 | 1.0759 | 0.9302 | 0.7905 | 0.8922 | 0.0707 |
| LRWD1      | 0.6785 | 1.3823 | 0.8979 | 0.6103 | 0.8923 | 0.1745 |
| PTBP2      | 0.7138 | 1.1326 | 0.9629 | 0.7598 | 0.8923 | 0.0967 |
| AARSD1     | 0.7806 | 1.2453 | 0.8395 | 0.7039 | 0.8923 | 0.1209 |
| LOC730041  | 0.7452 | 0.9966 | 0.9770 | 0.8507 | 0.8924 | 0.0588 |
| UBR5       | 0.8224 | 1.2344 | 0.8478 | 0.6650 | 0.8924 | 0.1209 |
| NAT14      | 0.8027 | 1.2846 | 0.8525 | 0.6302 | 0.8925 | 0.1391 |
| TRIM24     | 0.7762 | 0.9880 | 1.0807 | 0.7252 | 0.8925 | 0.0847 |
| C1orf159   | 0.8369 | 0.9714 | 0.8719 | 0.8901 | 0.8926 | 0.0285 |
| MRPS21     | 0.7450 | 1.1552 | 1.0207 | 0.6495 | 0.8926 | 0.1177 |
| LOC1001294 | 0.7388 | 0.9313 | 0.9467 | 0.9536 | 0.8926 | 0.0515 |
| LOC642290  | 0.8110 | 1.0607 | 0.9239 | 0.7748 | 0.8926 | 0.0644 |
| MIR1914    | 0.9294 | 0.9222 | 0.9123 | 0.8066 | 0.8926 | 0.0289 |
| MGC2752    | 0.7155 | 1.2371 | 0.9443 | 0.6739 | 0.8927 | 0.1293 |
| PPP2R1B    | 0.7598 | 1.0638 | 0.9771 | 0.7703 | 0.8928 | 0.0758 |
| C11orf61   | 0.8159 | 1.0758 | 0.8703 | 0.8091 | 0.8928 | 0.0625 |
| DMXL2      | 0.8516 | 1.1126 | 0.7973 | 0.8096 | 0.8928 | 0.0742 |
| USP37      | 0.8499 | 1.1401 | 0.8327 | 0.7485 | 0.8928 | 0.0854 |
| JARID1D    | 0.8829 | 1.1055 | 0.8511 | 0.7318 | 0.8928 | 0.0780 |
| FBXL15     | 0.7906 | 1.0558 | 0.9376 | 0.7874 | 0.8928 | 0.0646 |
| PITPNB     | 0.8227 | 1.0802 | 0.9355 | 0.7330 | 0.8928 | 0.0749 |
| MRPL13     | 0.7183 | 1.0990 | 1.0371 | 0.7170 | 0.8929 | 0.1019 |
| LOC643109  | 0.8919 | 0.8624 | 0.9060 | 0.9110 | 0.8929 | 0.0109 |
| TTC32      | 0.7589 | 1.1831 | 0.8867 | 0.7429 | 0.8929 | 0.1019 |
| MEN1       | 0.8622 | 1.0206 | 0.9158 | 0.7731 | 0.8929 | 0.0517 |

|            |        |        |        |        |        |        |
|------------|--------|--------|--------|--------|--------|--------|
| ERGIC1     | 0.7240 | 1.2729 | 0.9129 | 0.6619 | 0.8929 | 0.1374 |
| NDUFS2     | 0.8302 | 1.0036 | 0.9860 | 0.7519 | 0.8929 | 0.0611 |
| ARRDC2     | 0.7610 | 1.0599 | 0.9982 | 0.7527 | 0.8930 | 0.0796 |
| LOC644701  | 0.9004 | 0.8018 | 0.9057 | 0.9641 | 0.8930 | 0.0337 |
| NFU1       | 0.7843 | 1.0711 | 0.9926 | 0.7241 | 0.8930 | 0.0827 |
| KIF24      | 0.7540 | 1.0304 | 0.9769 | 0.8107 | 0.8930 | 0.0658 |
| TMEM87B    | 0.7448 | 1.1384 | 0.9773 | 0.7116 | 0.8930 | 0.1009 |
| ANO10      | 0.8378 | 1.1854 | 0.8755 | 0.6738 | 0.8931 | 0.1068 |
| NHEDC2     | 0.7961 | 0.9380 | 0.9483 | 0.8902 | 0.8931 | 0.0347 |
| LOC400061  | 0.7295 | 1.0192 | 1.0457 | 0.7782 | 0.8932 | 0.0812 |
| ARL5B      | 0.7880 | 1.0511 | 0.9596 | 0.7741 | 0.8932 | 0.0675 |
| CAMKV      | 0.8774 | 0.9997 | 0.8270 | 0.8689 | 0.8932 | 0.0371 |
| NHLRC3     | 0.8865 | 0.9316 | 0.9989 | 0.7561 | 0.8933 | 0.0512 |
| METTL2A    | 0.7615 | 1.0270 | 0.9636 | 0.8210 | 0.8933 | 0.0615 |
| ZNF185     | 0.9544 | 1.0170 | 0.9027 | 0.6989 | 0.8933 | 0.0689 |
| C6orf105   | 0.8157 | 1.0087 | 0.9056 | 0.8431 | 0.8933 | 0.0428 |
| SETMAR     | 0.7226 | 1.2133 | 0.9944 | 0.6429 | 0.8933 | 0.1305 |
| PSMD6      | 0.7600 | 1.0865 | 1.0390 | 0.6878 | 0.8933 | 0.0994 |
| POLR3D     | 0.8114 | 1.0401 | 1.0046 | 0.7173 | 0.8933 | 0.0773 |
| OTUD1      | 0.8764 | 0.9554 | 0.9591 | 0.7825 | 0.8933 | 0.0416 |
| FBXO3      | 0.7973 | 1.1866 | 0.8932 | 0.6963 | 0.8934 | 0.1057 |
| ARPC4      | 0.7118 | 1.2341 | 0.9202 | 0.7073 | 0.8934 | 0.1240 |
| UBE2J2     | 0.8926 | 1.0243 | 0.8791 | 0.7774 | 0.8934 | 0.0507 |
| LOC168474  | 0.8615 | 0.9360 | 1.0113 | 0.7647 | 0.8934 | 0.0527 |
| LOC1001320 | 0.8440 | 1.0609 | 0.8336 | 0.8350 | 0.8934 | 0.0559 |
| ARID4B     | 0.7861 | 1.1346 | 0.9841 | 0.6689 | 0.8934 | 0.1034 |
| LOC653214  | 0.8147 | 0.9235 | 0.9559 | 0.8796 | 0.8934 | 0.0305 |
| C3orf75    | 0.7644 | 1.1777 | 0.8945 | 0.7372 | 0.8935 | 0.1008 |
| SENP7      | 0.7950 | 1.0965 | 0.8662 | 0.8162 | 0.8935 | 0.0693 |
| PLEKHA9    | 0.7384 | 1.1564 | 0.8678 | 0.8116 | 0.8935 | 0.0915 |
| DPY19L3    | 0.7418 | 1.0818 | 0.9241 | 0.8266 | 0.8936 | 0.0730 |
| C4orf14    | 0.7841 | 1.1284 | 0.9760 | 0.6860 | 0.8936 | 0.0987 |
| HDGFRP3    | 0.9338 | 0.9091 | 1.0007 | 0.7309 | 0.8936 | 0.0576 |
| STAG3L3    | 0.7185 | 1.1694 | 0.8554 | 0.8314 | 0.8937 | 0.0966 |
| LOC389293  | 0.8681 | 0.9810 | 1.0518 | 0.6740 | 0.8937 | 0.0824 |
| CBR1       | 0.7869 | 0.9730 | 0.9481 | 0.8670 | 0.8938 | 0.0422 |
| DENND2C    | 0.8000 | 1.0460 | 0.9566 | 0.7724 | 0.8938 | 0.0650 |
| VN1R1      | 0.8451 | 0.9353 | 0.9154 | 0.8795 | 0.8938 | 0.0199 |
| MIR646     | 0.8209 | 0.9898 | 0.9440 | 0.8206 | 0.8938 | 0.0432 |
| MSRA       | 0.7709 | 1.0192 | 1.0374 | 0.7479 | 0.8939 | 0.0779 |
| LOC648408  | 0.8689 | 0.9317 | 0.9451 | 0.8298 | 0.8939 | 0.0270 |
| DHRS4L2    | 0.6594 | 1.4475 | 0.7550 | 0.7137 | 0.8939 | 0.1856 |
| ZBTB48     | 0.7781 | 1.2547 | 0.7851 | 0.7577 | 0.8939 | 0.1204 |
| SNORD88B   | 0.7789 | 1.0125 | 0.8942 | 0.8901 | 0.8939 | 0.0477 |
| MKL2       | 0.9140 | 0.9334 | 0.9459 | 0.7824 | 0.8939 | 0.0377 |
| MAPBPIP    | 0.8314 | 1.1181 | 0.8921 | 0.7343 | 0.8940 | 0.0815 |

|            |        |        |        |        |        |        |
|------------|--------|--------|--------|--------|--------|--------|
| IGSF9      | 0.9066 | 1.1381 | 0.7861 | 0.7451 | 0.8940 | 0.0883 |
| ZUFSP      | 0.7564 | 1.1137 | 0.9355 | 0.7704 | 0.8940 | 0.0838 |
| PHIP       | 0.7234 | 1.2038 | 0.9721 | 0.6767 | 0.8940 | 0.1219 |
| C1orf35    | 0.7359 | 1.1837 | 0.9885 | 0.6681 | 0.8940 | 0.1186 |
| LOC1001325 | 0.8653 | 0.9732 | 0.9905 | 0.7473 | 0.8940 | 0.0562 |
| BDP1       | 0.7689 | 1.1177 | 0.8395 | 0.8501 | 0.8940 | 0.0767 |
| LOC648581  | 0.8137 | 1.0533 | 0.9531 | 0.7561 | 0.8941 | 0.0673 |
| FAM19A4    | 0.8298 | 1.0180 | 0.8846 | 0.8438 | 0.8941 | 0.0429 |
| LOC642888  | 0.8775 | 0.9508 | 0.9276 | 0.8204 | 0.8941 | 0.0289 |
| SPATA13    | 0.8347 | 0.9532 | 0.9521 | 0.8364 | 0.8941 | 0.0338 |
| PRPF40A    | 0.8297 | 0.9660 | 1.0000 | 0.7809 | 0.8941 | 0.0527 |
| ITIH1      | 0.8322 | 0.9029 | 1.0077 | 0.8338 | 0.8942 | 0.0413 |
| RAB2A      | 0.6888 | 1.2141 | 0.9504 | 0.7233 | 0.8942 | 0.1214 |
| LOC339483  | 0.7800 | 0.9757 | 0.9324 | 0.8889 | 0.8942 | 0.0420 |
| DSC3       | 0.7987 | 1.0595 | 0.8983 | 0.8205 | 0.8942 | 0.0591 |
| VGLL4      | 0.8816 | 1.3537 | 0.7800 | 0.5617 | 0.8942 | 0.1671 |
| KIAA1751   | 0.7148 | 1.0000 | 1.0585 | 0.8038 | 0.8942 | 0.0809 |
| PHF6       | 0.8156 | 1.0296 | 0.9200 | 0.8119 | 0.8943 | 0.0516 |
| SFRS6      | 0.8062 | 1.1748 | 0.8126 | 0.7836 | 0.8943 | 0.0937 |
| KCNK1      | 0.8451 | 0.9475 | 1.0260 | 0.7587 | 0.8943 | 0.0585 |
| WDR48      | 0.7967 | 1.1551 | 0.9334 | 0.6923 | 0.8944 | 0.0999 |
| MAP3K14    | 0.8516 | 1.0414 | 0.8494 | 0.8350 | 0.8944 | 0.0492 |
| KIAA0247   | 0.8159 | 1.1348 | 0.8771 | 0.7497 | 0.8944 | 0.0843 |
| ZNF789     | 0.7917 | 1.0315 | 0.9241 | 0.8301 | 0.8944 | 0.0535 |
| LSM6       | 0.7912 | 0.9932 | 0.9916 | 0.8016 | 0.8944 | 0.0566 |
| IFT52      | 0.7925 | 1.1667 | 0.9563 | 0.6622 | 0.8944 | 0.1089 |
| BANP       | 0.8175 | 1.1055 | 0.9195 | 0.7354 | 0.8945 | 0.0798 |
| FLJ16686   | 0.7628 | 1.0498 | 0.9440 | 0.8213 | 0.8945 | 0.0641 |
| IFI16      | 0.9772 | 0.8151 | 0.9031 | 0.8827 | 0.8945 | 0.0334 |
| NR2F6      | 0.7160 | 1.3646 | 0.7963 | 0.7013 | 0.8945 | 0.1581 |
| ARF1       | 0.7876 | 1.0869 | 0.9498 | 0.7540 | 0.8946 | 0.0771 |
| LOC728262  | 0.7573 | 1.0217 | 0.9569 | 0.8425 | 0.8946 | 0.0589 |
| CKMT1B     | 0.8944 | 1.0512 | 1.0159 | 0.6169 | 0.8946 | 0.0985 |
| ZSWIM7     | 0.9012 | 1.0542 | 0.9022 | 0.7209 | 0.8946 | 0.0682 |
| DNAJA2     | 0.6529 | 1.2118 | 1.0351 | 0.6786 | 0.8946 | 0.1371 |
| RNF115     | 0.8026 | 1.2191 | 0.9032 | 0.6538 | 0.8946 | 0.1197 |
| LOC645434  | 0.8687 | 1.0442 | 0.8463 | 0.8195 | 0.8947 | 0.0508 |
| RAB40B     | 0.8374 | 1.1814 | 0.8374 | 0.7227 | 0.8947 | 0.0993 |
| LOC728673  | 0.8639 | 0.8720 | 1.0534 | 0.7896 | 0.8947 | 0.0560 |
| LOC387870  | 0.7918 | 0.9498 | 1.0058 | 0.8317 | 0.8948 | 0.0500 |
| C2orf61    | 0.8919 | 0.9614 | 0.8537 | 0.8720 | 0.8948 | 0.0235 |
| LOC731139  | 0.8508 | 1.0166 | 0.9752 | 0.7364 | 0.8948 | 0.0635 |
| LOC151534  | 0.8836 | 0.8738 | 0.9924 | 0.8293 | 0.8948 | 0.0346 |
| SLC38A7    | 0.9461 | 1.0606 | 0.7817 | 0.7908 | 0.8948 | 0.0669 |
| TSPAN14    | 0.7319 | 1.1683 | 0.8835 | 0.7955 | 0.8948 | 0.0963 |
| NMI        | 0.8930 | 1.1012 | 0.8481 | 0.7369 | 0.8948 | 0.0762 |



|           |        |        |        |        |        |        |
|-----------|--------|--------|--------|--------|--------|--------|
| DDX50     | 0.8042 | 1.1444 | 0.9387 | 0.6920 | 0.8948 | 0.0973 |
| MGC26356  | 0.7670 | 1.2943 | 0.9022 | 0.6158 | 0.8948 | 0.1454 |
| CNIH2     | 0.8786 | 0.9988 | 0.8606 | 0.8413 | 0.8948 | 0.0355 |
| PER2      | 0.7539 | 1.0852 | 1.0288 | 0.7118 | 0.8949 | 0.0947 |
| LOC654342 | 0.7882 | 1.0891 | 0.9018 | 0.8005 | 0.8949 | 0.0695 |
| UROS      | 0.7838 | 1.1736 | 0.8906 | 0.7318 | 0.8949 | 0.0986 |
| MDN1      | 0.7908 | 1.0054 | 0.9428 | 0.8407 | 0.8949 | 0.0485 |
| LOC645605 | 0.9052 | 0.9581 | 0.9260 | 0.7905 | 0.8949 | 0.0365 |
| TTLL8     | 0.8893 | 0.9281 | 0.8838 | 0.8787 | 0.8950 | 0.0112 |
| C1orf58   | 0.6850 | 1.0440 | 1.0739 | 0.7772 | 0.8950 | 0.0967 |
| ATPAF2    | 0.7719 | 1.1057 | 0.9601 | 0.7429 | 0.8951 | 0.0851 |
| SATB2     | 0.8668 | 1.0904 | 0.8264 | 0.7970 | 0.8952 | 0.0666 |
| C8orf30B  | 0.7156 | 1.0446 | 0.9993 | 0.8211 | 0.8952 | 0.0769 |
| GPR89A    | 0.7529 | 1.2970 | 0.8104 | 0.7204 | 0.8952 | 0.1352 |
| BEND4     | 0.8336 | 1.0578 | 0.8910 | 0.7984 | 0.8952 | 0.0575 |
| VPS37B    | 1.0666 | 1.1647 | 0.8078 | 0.5416 | 0.8952 | 0.1399 |
| GSTM1L    | 0.8182 | 0.9785 | 0.9472 | 0.8369 | 0.8952 | 0.0398 |
| SHISA4    | 0.8234 | 1.0444 | 0.8707 | 0.8424 | 0.8952 | 0.0507 |
| CRKRS     | 0.7028 | 1.1884 | 0.8999 | 0.7898 | 0.8952 | 0.1057 |
| IER5L     | 0.8180 | 1.0114 | 0.9756 | 0.7762 | 0.8953 | 0.0578 |
| PLEKHG2   | 0.9231 | 0.9733 | 0.9550 | 0.7298 | 0.8953 | 0.0561 |
| C18orf21  | 0.7208 | 1.1438 | 1.0068 | 0.7099 | 0.8953 | 0.1076 |
| ZFP36L1   | 0.8859 | 0.8965 | 1.0527 | 0.7463 | 0.8953 | 0.0626 |
| RAB18     | 0.7118 | 1.0807 | 1.0765 | 0.7124 | 0.8953 | 0.1058 |
| TNRC6A    | 0.7545 | 1.1605 | 0.7959 | 0.8705 | 0.8953 | 0.0916 |
| PSAPL1    | 0.8799 | 0.9788 | 0.9862 | 0.7366 | 0.8954 | 0.0582 |
| SCO1      | 0.7046 | 1.1520 | 1.0463 | 0.6788 | 0.8954 | 0.1197 |
| LOC646426 | 0.8152 | 0.9603 | 0.9782 | 0.8279 | 0.8954 | 0.0429 |
| OVCH2     | 0.8823 | 0.9507 | 0.9698 | 0.7789 | 0.8954 | 0.0431 |
| IK        | 0.7912 | 1.2206 | 0.9026 | 0.6673 | 0.8954 | 0.1186 |
| PMPCA     | 0.8062 | 1.2109 | 0.9111 | 0.6536 | 0.8955 | 0.1177 |
| B4GALT1   | 0.9449 | 0.9246 | 0.9646 | 0.7479 | 0.8955 | 0.0499 |
| RDX       | 0.7402 | 1.2091 | 0.9743 | 0.6584 | 0.8955 | 0.1241 |
| CCNYL1    | 0.7402 | 1.1821 | 0.8933 | 0.7664 | 0.8955 | 0.1012 |
| LOC146177 | 0.8719 | 1.0357 | 0.8787 | 0.7958 | 0.8955 | 0.0504 |
| SMARCC2   | 0.7413 | 1.1330 | 0.9150 | 0.7929 | 0.8955 | 0.0871 |
| TMEM18    | 0.8459 | 1.0048 | 0.9377 | 0.7938 | 0.8955 | 0.0470 |
| NCF1      | 0.8185 | 1.0036 | 0.9611 | 0.7990 | 0.8956 | 0.0510 |
| ZNF319    | 0.7243 | 1.2096 | 0.8606 | 0.7878 | 0.8956 | 0.1083 |
| LOC728686 | 0.8595 | 0.9663 | 0.9116 | 0.8449 | 0.8956 | 0.0276 |
| MGAT4A    | 0.8669 | 1.0565 | 0.8566 | 0.8025 | 0.8956 | 0.0555 |
| DHX37     | 0.8067 | 1.2168 | 0.8542 | 0.7047 | 0.8956 | 0.1115 |
| MOGAT2    | 0.7832 | 1.1266 | 0.8875 | 0.7852 | 0.8956 | 0.0808 |
| FOXP1     | 0.8236 | 1.0826 | 0.9131 | 0.7633 | 0.8956 | 0.0695 |
| KLF10     | 0.8099 | 1.0952 | 0.9043 | 0.7733 | 0.8957 | 0.0720 |
| LOC653219 | 0.8023 | 1.1664 | 0.9448 | 0.6691 | 0.8957 | 0.1064 |

|            |        |        |        |        |        |        |
|------------|--------|--------|--------|--------|--------|--------|
| ERCC8      | 0.8122 | 1.0849 | 0.8834 | 0.8022 | 0.8957 | 0.0656 |
| RBM38      | 0.8751 | 1.0069 | 0.8983 | 0.8024 | 0.8957 | 0.0423 |
| TMEM98     | 0.7231 | 1.1763 | 0.9097 | 0.7735 | 0.8957 | 0.1015 |
| LOC641694  | 0.7685 | 1.0885 | 1.0039 | 0.7222 | 0.8958 | 0.0890 |
| CLDN15     | 0.8269 | 1.1172 | 0.8767 | 0.7623 | 0.8958 | 0.0774 |
| SCARNA18   | 0.6625 | 1.0614 | 1.0532 | 0.8060 | 0.8958 | 0.0977 |
| ADO        | 0.7825 | 1.1614 | 0.9659 | 0.6732 | 0.8958 | 0.1072 |
| HINFP      | 0.8299 | 1.1583 | 0.7707 | 0.8242 | 0.8958 | 0.0885 |
| LOC654126  | 0.8771 | 1.0030 | 0.9009 | 0.8023 | 0.8958 | 0.0415 |
| NUFIP1     | 0.7854 | 1.0921 | 0.8888 | 0.8171 | 0.8958 | 0.0689 |
| CS         | 0.7851 | 1.1800 | 0.9054 | 0.7129 | 0.8959 | 0.1027 |
| C1GALT1C1  | 0.7640 | 1.1057 | 0.9615 | 0.7523 | 0.8959 | 0.0848 |
| EVI5       | 0.7784 | 1.1107 | 0.9817 | 0.7126 | 0.8959 | 0.0917 |
| LOC645123  | 0.8675 | 0.8895 | 1.0153 | 0.8112 | 0.8959 | 0.0431 |
| DARS       | 0.8222 | 1.2258 | 0.9230 | 0.6125 | 0.8959 | 0.1276 |
| LOC730020  | 0.8047 | 1.0658 | 0.9482 | 0.7650 | 0.8959 | 0.0689 |
| LOC728098  | 0.7921 | 1.2007 | 0.8761 | 0.7149 | 0.8959 | 0.1068 |
| GFM2       | 0.7860 | 1.2295 | 0.9227 | 0.6456 | 0.8959 | 0.1247 |
| LOC648740  | 0.8132 | 1.0544 | 0.9376 | 0.7787 | 0.8960 | 0.0629 |
| LOC1001341 | 0.8422 | 1.0785 | 0.7720 | 0.8911 | 0.8960 | 0.0656 |
| SPTBN5     | 0.8563 | 1.0719 | 0.8710 | 0.7847 | 0.8960 | 0.0616 |
| PHF17      | 0.8006 | 1.0852 | 0.9201 | 0.7782 | 0.8960 | 0.0703 |
| DNAJB13    | 0.8739 | 0.9711 | 0.8206 | 0.9187 | 0.8961 | 0.0321 |
| NME5       | 0.7979 | 1.2800 | 0.8373 | 0.6691 | 0.8961 | 0.1329 |
| MIR1253    | 0.8189 | 1.0015 | 0.9424 | 0.8215 | 0.8961 | 0.0454 |
| LOC1001278 | 0.7747 | 0.9736 | 0.9671 | 0.8695 | 0.8962 | 0.0470 |
| LOC1001346 | 0.6592 | 1.2411 | 0.8784 | 0.8061 | 0.8962 | 0.1237 |
| CHRNA2     | 0.8929 | 0.9850 | 1.0057 | 0.7013 | 0.8962 | 0.0694 |
| EIF3C      | 0.8787 | 0.9887 | 0.8668 | 0.8507 | 0.8962 | 0.0313 |
| WDR62      | 0.7448 | 1.0241 | 0.8892 | 0.9269 | 0.8963 | 0.0579 |
| VPS28      | 0.8572 | 1.1809 | 0.8584 | 0.6887 | 0.8963 | 0.1029 |
| SH3PXD2B   | 0.8375 | 1.0388 | 0.9050 | 0.8039 | 0.8963 | 0.0520 |
| B3GNT6     | 0.7704 | 1.2084 | 0.8949 | 0.7116 | 0.8963 | 0.1108 |
| LOC341784  | 0.7890 | 1.1419 | 0.9292 | 0.7252 | 0.8963 | 0.0923 |
| SFT2D1     | 0.7602 | 1.2075 | 0.9313 | 0.6865 | 0.8964 | 0.1157 |
| C9orf85    | 0.7963 | 1.0247 | 1.0039 | 0.7607 | 0.8964 | 0.0686 |
| LOC1001340 | 0.7986 | 0.9268 | 1.0762 | 0.7839 | 0.8964 | 0.0680 |
| SNX8       | 0.8076 | 1.1790 | 0.8985 | 0.7005 | 0.8964 | 0.1025 |
| C5orf28    | 0.6876 | 1.2434 | 0.9364 | 0.7183 | 0.8964 | 0.1282 |
| SUCLA2     | 0.8386 | 1.0281 | 1.0104 | 0.7086 | 0.8964 | 0.0758 |
| PRDM12     | 0.7523 | 1.0881 | 0.9527 | 0.7927 | 0.8965 | 0.0772 |
| LOC730883  | 0.6821 | 1.1179 | 0.9190 | 0.8669 | 0.8965 | 0.0896 |
| GCDH       | 0.9449 | 1.0200 | 0.9309 | 0.6902 | 0.8965 | 0.0715 |
| C9orf95    | 0.8470 | 0.9921 | 1.0991 | 0.6478 | 0.8965 | 0.0977 |
| LOC1001305 | 0.6829 | 1.2011 | 0.9966 | 0.7058 | 0.8966 | 0.1241 |
| PGGT1B     | 0.7706 | 1.0909 | 0.9828 | 0.7421 | 0.8966 | 0.0841 |

|            |        |        |        |        |        |        |
|------------|--------|--------|--------|--------|--------|--------|
| C14orf131  | 0.8630 | 1.0535 | 0.8414 | 0.8287 | 0.8966 | 0.0528 |
| DAXX       | 0.7089 | 1.1041 | 0.9909 | 0.7828 | 0.8967 | 0.0913 |
| PPP1R12B   | 0.9867 | 0.9845 | 0.9159 | 0.6998 | 0.8967 | 0.0677 |
| SNW1       | 0.8217 | 1.1313 | 1.0042 | 0.6298 | 0.8967 | 0.1093 |
| ABCG1      | 0.8106 | 1.0437 | 0.9311 | 0.8016 | 0.8968 | 0.0572 |
| LOC439949  | 0.7581 | 0.9924 | 1.0196 | 0.8169 | 0.8968 | 0.0644 |
| PPARG      | 0.8543 | 1.0399 | 0.8552 | 0.8377 | 0.8968 | 0.0479 |
| TOE1       | 0.7130 | 0.9442 | 1.0093 | 0.9207 | 0.8968 | 0.0641 |
| TMEM120B   | 0.7553 | 1.0300 | 0.9556 | 0.8463 | 0.8968 | 0.0604 |
| LOC643761  | 0.8333 | 0.9141 | 0.9828 | 0.8571 | 0.8968 | 0.0333 |
| ZNF773     | 0.6646 | 1.1000 | 1.0561 | 0.7667 | 0.8968 | 0.1070 |
| HARBI1     | 0.8831 | 1.0336 | 0.9242 | 0.7466 | 0.8969 | 0.0593 |
| CRYZL1     | 0.7581 | 1.0806 | 1.0043 | 0.7445 | 0.8969 | 0.0855 |
| CDC42BPG   | 0.8794 | 1.0218 | 0.8970 | 0.7893 | 0.8969 | 0.0479 |
| LOC728927  | 0.8698 | 0.9306 | 0.8990 | 0.8881 | 0.8969 | 0.0127 |
| LOC1001320 | 0.6200 | 0.9798 | 1.1291 | 0.8586 | 0.8969 | 0.1076 |
| ZNF286C    | 0.8008 | 1.0699 | 0.9172 | 0.7997 | 0.8969 | 0.0639 |
| ATPGD1     | 0.9422 | 0.9655 | 0.8842 | 0.7957 | 0.8969 | 0.0378 |
| C1R        | 0.7913 | 1.0526 | 0.9096 | 0.8343 | 0.8970 | 0.0574 |
| SYNGR1     | 0.8549 | 1.0110 | 0.8781 | 0.8438 | 0.8970 | 0.0387 |
| FAM195A    | 0.8541 | 1.1779 | 0.8141 | 0.7419 | 0.8970 | 0.0965 |
| NPAL3      | 0.7159 | 1.0595 | 1.0247 | 0.7880 | 0.8970 | 0.0853 |
| CCDC16     | 0.7683 | 1.1749 | 0.9135 | 0.7315 | 0.8970 | 0.1006 |
| ZNF813     | 0.7395 | 1.1224 | 0.9251 | 0.8014 | 0.8971 | 0.0844 |
| ODZ4       | 0.8652 | 1.0236 | 0.7811 | 0.9185 | 0.8971 | 0.0508 |
| NRIP3      | 0.7994 | 1.0562 | 0.9250 | 0.8080 | 0.8971 | 0.0603 |
| LOC1001302 | 0.9428 | 1.0004 | 0.8494 | 0.7961 | 0.8972 | 0.0459 |
| GUCY1A3    | 0.7648 | 1.1867 | 0.8797 | 0.7574 | 0.8972 | 0.1005 |
| LOC1001345 | 0.8314 | 0.9794 | 0.8612 | 0.9166 | 0.8972 | 0.0326 |
| STX8       | 0.6839 | 1.1412 | 1.0003 | 0.7633 | 0.8972 | 0.1055 |
| LOC1001314 | 0.8685 | 1.0333 | 0.8366 | 0.8502 | 0.8972 | 0.0459 |
| LOC642732  | 0.8165 | 1.0552 | 0.8632 | 0.8538 | 0.8972 | 0.0536 |
| ZNF101     | 0.7714 | 1.0085 | 0.9364 | 0.8724 | 0.8972 | 0.0503 |
| SESTD1     | 0.7087 | 1.1193 | 0.9783 | 0.7825 | 0.8972 | 0.0934 |
| PPM1M      | 0.8797 | 1.0369 | 0.9038 | 0.7685 | 0.8972 | 0.0551 |
| MARVELD2   | 0.8336 | 1.0102 | 1.0173 | 0.7279 | 0.8972 | 0.0706 |
| SURF2      | 0.8908 | 1.0822 | 0.8059 | 0.8102 | 0.8973 | 0.0647 |
| EPS15L1    | 0.7980 | 1.0317 | 0.9656 | 0.7938 | 0.8973 | 0.0601 |
| RG9MTD3    | 0.8488 | 1.0902 | 0.8132 | 0.8371 | 0.8973 | 0.0647 |
| C11orf68   | 0.8329 | 1.1598 | 0.8941 | 0.7025 | 0.8973 | 0.0962 |
| WDR65      | 0.9098 | 0.9750 | 0.8663 | 0.8382 | 0.8973 | 0.0298 |
| IFT88      | 0.8382 | 0.9870 | 0.9721 | 0.7923 | 0.8974 | 0.0484 |
| CLCN5      | 0.8656 | 1.0364 | 0.9406 | 0.7471 | 0.8974 | 0.0611 |
| LOC642302  | 0.9289 | 0.8935 | 0.8962 | 0.8711 | 0.8974 | 0.0119 |
| KRBA2      | 0.8216 | 1.0971 | 0.8690 | 0.8022 | 0.8975 | 0.0680 |
| CABLES2    | 0.9398 | 1.0199 | 0.8062 | 0.8239 | 0.8975 | 0.0504 |

|            |        |        |        |        |        |        |
|------------|--------|--------|--------|--------|--------|--------|
| ELF4       | 0.8215 | 1.0367 | 0.9040 | 0.8277 | 0.8975 | 0.0501 |
| GGTLC1     | 0.8208 | 1.0388 | 0.9552 | 0.7754 | 0.8976 | 0.0606 |
| NAB1       | 0.8638 | 0.8569 | 0.9611 | 0.9088 | 0.8976 | 0.0241 |
| LDOC1L     | 1.0199 | 1.0562 | 0.8655 | 0.6490 | 0.8976 | 0.0926 |
| KIAA0133   | 0.8071 | 1.1109 | 0.8680 | 0.8046 | 0.8977 | 0.0726 |
| TMOD3      | 0.7152 | 1.2122 | 0.8567 | 0.8065 | 0.8977 | 0.1089 |
| LOC645875  | 0.6990 | 1.0894 | 0.9134 | 0.8889 | 0.8977 | 0.0799 |
| LOC390298  | 0.8489 | 1.1422 | 0.8833 | 0.7162 | 0.8977 | 0.0891 |
| NXPH4      | 0.8526 | 1.0297 | 0.9240 | 0.7846 | 0.8977 | 0.0524 |
| TNPO3      | 0.7568 | 1.3296 | 0.7528 | 0.7515 | 0.8977 | 0.1440 |
| MIR1912    | 0.8760 | 0.9086 | 0.9797 | 0.8265 | 0.8977 | 0.0321 |
| LOC1001305 | 0.8761 | 0.9612 | 0.9028 | 0.8508 | 0.8977 | 0.0237 |
| BRD8       | 0.9130 | 1.1929 | 0.7722 | 0.7128 | 0.8977 | 0.1070 |
| OSBPL9     | 0.8230 | 1.1773 | 0.8109 | 0.7797 | 0.8977 | 0.0936 |
| FAM102A    | 0.7865 | 1.1414 | 0.9109 | 0.7521 | 0.8977 | 0.0881 |
| ONECUT2    | 0.8434 | 1.0638 | 0.8361 | 0.8476 | 0.8977 | 0.0554 |
| GRIN1      | 0.8475 | 0.9585 | 0.9022 | 0.8827 | 0.8977 | 0.0232 |
| PIGV       | 0.6164 | 0.8602 | 1.3582 | 0.7562 | 0.8977 | 0.1614 |
| LOC1001325 | 0.9038 | 1.0621 | 0.8622 | 0.7629 | 0.8977 | 0.0623 |
| C19orf52   | 0.7117 | 1.2009 | 0.9736 | 0.7048 | 0.8978 | 0.1189 |
| OVCA2      | 0.7636 | 1.2592 | 0.8792 | 0.6890 | 0.8978 | 0.1267 |
| GLT8D1     | 0.7466 | 1.0732 | 0.9438 | 0.8275 | 0.8978 | 0.0711 |
| LMF1       | 0.8014 | 1.0577 | 0.9149 | 0.8171 | 0.8978 | 0.0589 |
| KLHL1      | 0.8334 | 0.9028 | 0.9546 | 0.9005 | 0.8978 | 0.0248 |
| ULBP2      | 0.9811 | 1.0566 | 0.7848 | 0.7690 | 0.8979 | 0.0716 |
| CXorf39    | 0.7985 | 1.0061 | 1.0566 | 0.7304 | 0.8979 | 0.0789 |
| MGC88374   | 0.9109 | 0.9257 | 0.8877 | 0.8674 | 0.8979 | 0.0128 |
| ELOVL7     | 0.8221 | 1.0073 | 0.9442 | 0.8181 | 0.8979 | 0.0467 |
| LOC1001288 | 0.8487 | 0.9897 | 0.8759 | 0.8775 | 0.8979 | 0.0313 |
| MGC35440   | 0.7866 | 0.9824 | 0.9591 | 0.8637 | 0.8980 | 0.0451 |
| IRX2       | 0.8818 | 1.1796 | 0.7690 | 0.7615 | 0.8980 | 0.0978 |
| VAMP7      | 0.7936 | 1.2643 | 0.9127 | 0.6212 | 0.8980 | 0.1360 |
| SFMBT1     | 0.7794 | 1.0895 | 0.8895 | 0.8336 | 0.8980 | 0.0677 |
| ARR3       | 0.9908 | 1.0074 | 0.7254 | 0.8684 | 0.8980 | 0.0654 |
| LOC1001339 | 0.8690 | 0.9516 | 0.9685 | 0.8029 | 0.8980 | 0.0385 |
| C9orf80    | 0.8281 | 1.1922 | 0.8067 | 0.7653 | 0.8981 | 0.0989 |
| FLJ27255   | 0.8361 | 1.0437 | 0.8669 | 0.8457 | 0.8981 | 0.0490 |
| THAP3      | 0.8323 | 1.0143 | 0.9379 | 0.8080 | 0.8981 | 0.0479 |
| NOL9       | 0.7914 | 1.0520 | 0.9282 | 0.8211 | 0.8982 | 0.0591 |
| ZFP37      | 0.7904 | 1.1593 | 0.7305 | 0.9124 | 0.8982 | 0.0949 |
| LOC113230  | 0.7708 | 0.9862 | 0.9740 | 0.8617 | 0.8982 | 0.0509 |
| MIR658     | 0.8061 | 1.0966 | 0.9095 | 0.7807 | 0.8982 | 0.0718 |
| DHX34      | 0.8046 | 1.1174 | 0.8787 | 0.7922 | 0.8982 | 0.0755 |
| LOC389958  | 0.9026 | 1.0400 | 0.8319 | 0.8185 | 0.8982 | 0.0507 |
| LOC200030  | 0.7402 | 1.3661 | 0.7447 | 0.7422 | 0.8983 | 0.1559 |
| DCAF7      | 0.8698 | 1.1466 | 0.8677 | 0.7092 | 0.8983 | 0.0909 |

|            |        |        |        |        |        |        |
|------------|--------|--------|--------|--------|--------|--------|
| LOC441087  | 0.6037 | 1.1676 | 1.1933 | 0.6286 | 0.8983 | 0.1631 |
| PRNP       | 0.6806 | 1.2195 | 1.0187 | 0.6745 | 0.8983 | 0.1339 |
| STARD3     | 0.8688 | 1.0723 | 0.8424 | 0.8100 | 0.8984 | 0.0592 |
| LOC653803  | 0.7480 | 1.2029 | 0.8790 | 0.7635 | 0.8984 | 0.1056 |
| LOC1001317 | 0.8259 | 1.0014 | 0.9504 | 0.8158 | 0.8984 | 0.0460 |
| DIRC2      | 0.7469 | 1.2472 | 0.8508 | 0.7487 | 0.8984 | 0.1188 |
| SNORD30    | 0.8429 | 1.0258 | 0.8875 | 0.8375 | 0.8984 | 0.0439 |
| PSMF1      | 0.6870 | 1.1566 | 0.9394 | 0.8108 | 0.8984 | 0.1003 |
| JAGN1      | 0.7879 | 1.0830 | 0.8898 | 0.8332 | 0.8985 | 0.0649 |
| KRBA1      | 0.8412 | 1.1782 | 0.8017 | 0.7729 | 0.8985 | 0.0943 |
| DDX27      | 0.7668 | 1.2039 | 0.9378 | 0.6855 | 0.8985 | 0.1146 |
| LOC652815  | 0.9274 | 1.0596 | 0.8645 | 0.7425 | 0.8985 | 0.0660 |
| LOC728606  | 0.8244 | 1.0342 | 0.8965 | 0.8390 | 0.8985 | 0.0478 |
| HK1        | 0.8405 | 1.2913 | 0.7933 | 0.6689 | 0.8985 | 0.1358 |
| FES        | 0.7552 | 0.9723 | 0.9803 | 0.8865 | 0.8986 | 0.0523 |
| HOOK3      | 0.8224 | 1.0355 | 0.9037 | 0.8328 | 0.8986 | 0.0491 |
| LOC85390   | 0.7793 | 1.1937 | 0.7977 | 0.8237 | 0.8986 | 0.0988 |
| DKFZp434N0 | 0.8382 | 1.0248 | 0.9443 | 0.7872 | 0.8986 | 0.0533 |
| LOC644162  | 0.7151 | 1.1635 | 0.9734 | 0.7424 | 0.8986 | 0.1056 |
| RNF123     | 0.8251 | 1.1228 | 0.9528 | 0.6939 | 0.8986 | 0.0915 |
| C18orf34   | 0.8857 | 0.9788 | 0.8627 | 0.8675 | 0.8987 | 0.0271 |
| GLUL       | 0.8191 | 1.0470 | 0.9758 | 0.7529 | 0.8987 | 0.0680 |
| CTU2       | 0.8222 | 1.0860 | 0.8528 | 0.8338 | 0.8987 | 0.0628 |
| LOC649445  | 0.8050 | 0.9628 | 0.9773 | 0.8499 | 0.8987 | 0.0423 |
| GALE       | 0.8951 | 1.1087 | 0.8159 | 0.7753 | 0.8987 | 0.0743 |
| TXNL4B     | 0.8379 | 1.0067 | 0.9209 | 0.8295 | 0.8987 | 0.0415 |
| FYTTD1     | 0.8338 | 1.0436 | 0.9997 | 0.7179 | 0.8988 | 0.0753 |
| GPM6B      | 0.8016 | 0.9917 | 0.9658 | 0.8360 | 0.8988 | 0.0470 |
| WFDC13     | 0.6608 | 1.0235 | 1.0803 | 0.8306 | 0.8988 | 0.0956 |
| LOC642587  | 0.8153 | 0.9318 | 0.9957 | 0.8525 | 0.8988 | 0.0404 |
| LOC648638  | 0.7531 | 1.1952 | 0.9456 | 0.7015 | 0.8989 | 0.1119 |
| SNORA55    | 0.8235 | 0.9144 | 0.9063 | 0.9513 | 0.8989 | 0.0270 |
| LOC643802  | 0.8207 | 0.9557 | 0.8930 | 0.9262 | 0.8989 | 0.0290 |
| LOC646730  | 0.9228 | 0.9820 | 0.8684 | 0.8224 | 0.8989 | 0.0345 |
| FAM21C     | 0.8390 | 1.0242 | 0.9047 | 0.8279 | 0.8989 | 0.0451 |
| VISA       | 0.7790 | 1.2004 | 0.8273 | 0.7892 | 0.8990 | 0.1010 |
| SHROOM1    | 0.9133 | 1.0189 | 0.9053 | 0.7582 | 0.8990 | 0.0536 |
| LOC1001313 | 0.7362 | 1.0744 | 0.9814 | 0.8042 | 0.8990 | 0.0780 |
| ISM1       | 0.8625 | 1.0655 | 0.9322 | 0.7359 | 0.8990 | 0.0688 |
| LOC647970  | 0.7771 | 1.0884 | 0.9633 | 0.7673 | 0.8990 | 0.0776 |
| COX6B2     | 0.8844 | 0.9578 | 0.9294 | 0.8247 | 0.8991 | 0.0290 |
| RCCD1      | 0.8598 | 1.0136 | 0.8838 | 0.8391 | 0.8991 | 0.0393 |
| LOC643461  | 0.6818 | 1.0183 | 1.0322 | 0.8642 | 0.8991 | 0.0818 |
| NFKB1      | 0.7955 | 1.2726 | 0.8623 | 0.6661 | 0.8991 | 0.1310 |
| LOC1001305 | 0.8979 | 1.1709 | 0.7907 | 0.7369 | 0.8991 | 0.0966 |
| TRDMT1     | 0.8363 | 1.0302 | 0.9041 | 0.8259 | 0.8991 | 0.0470 |

|            |        |        |        |        |        |        |
|------------|--------|--------|--------|--------|--------|--------|
| LOC152217  | 0.9258 | 0.9288 | 0.9049 | 0.8371 | 0.8991 | 0.0214 |
| RNF168     | 0.7201 | 0.9645 | 1.0008 | 0.9111 | 0.8991 | 0.0624 |
| ASAH2B     | 0.8015 | 1.0529 | 0.8963 | 0.8458 | 0.8991 | 0.0548 |
| FUBP3      | 0.7230 | 1.0823 | 0.9643 | 0.8271 | 0.8992 | 0.0785 |
| CTSK       | 0.8348 | 1.0702 | 0.8737 | 0.8180 | 0.8992 | 0.0582 |
| NONO       | 0.6806 | 1.3393 | 0.8910 | 0.6859 | 0.8992 | 0.1547 |
| SEMA3G     | 0.9067 | 0.9077 | 0.9120 | 0.8704 | 0.8992 | 0.0097 |
| LOC644934  | 0.9342 | 0.9134 | 1.0202 | 0.7290 | 0.8992 | 0.0613 |
| TNFRSF1A   | 0.7788 | 1.3021 | 0.7622 | 0.7536 | 0.8992 | 0.1344 |
| TJAP1      | 0.8210 | 1.1467 | 0.8439 | 0.7852 | 0.8992 | 0.0834 |
| ZNF577     | 0.7456 | 1.0119 | 1.0463 | 0.7930 | 0.8992 | 0.0759 |
| SLC31A2    | 0.8065 | 1.1763 | 0.9598 | 0.6545 | 0.8993 | 0.1114 |
| CTR9       | 0.8740 | 0.9779 | 0.9433 | 0.8019 | 0.8993 | 0.0390 |
| TAF9       | 0.7915 | 1.0335 | 1.0084 | 0.7637 | 0.8993 | 0.0707 |
| MYO6       | 0.6530 | 1.2836 | 0.9170 | 0.7438 | 0.8993 | 0.1393 |
| CDH9       | 0.8994 | 0.9227 | 0.9762 | 0.7994 | 0.8994 | 0.0370 |
| PHF23      | 0.8036 | 1.0110 | 1.1525 | 0.6306 | 0.8994 | 0.1147 |
| LOC730877  | 0.7438 | 0.9390 | 0.9845 | 0.9304 | 0.8994 | 0.0532 |
| LOC647331  | 0.8832 | 0.8805 | 0.9297 | 0.9043 | 0.8994 | 0.0114 |
| LOC728811  | 0.8053 | 1.0164 | 0.9344 | 0.8420 | 0.8995 | 0.0475 |
| LOC1001302 | 0.8040 | 0.9965 | 1.0002 | 0.7974 | 0.8995 | 0.0571 |
| ZDHHC19    | 0.8169 | 1.0104 | 0.9064 | 0.8644 | 0.8995 | 0.0412 |
| PMS2L2     | 0.8394 | 1.0292 | 0.8850 | 0.8446 | 0.8996 | 0.0444 |
| LMO4       | 0.7589 | 1.1680 | 1.0149 | 0.6563 | 0.8996 | 0.1170 |
| SLC35A5    | 0.8290 | 1.0518 | 1.0811 | 0.6363 | 0.8996 | 0.1043 |
| MAP2K3     | 0.7704 | 1.1577 | 0.8905 | 0.7799 | 0.8996 | 0.0902 |
| CLCN2      | 0.7791 | 1.0384 | 0.9575 | 0.8233 | 0.8996 | 0.0598 |
| LOC388780  | 0.8975 | 0.9141 | 0.8818 | 0.9050 | 0.8996 | 0.0068 |
| FBXO6      | 0.8753 | 1.0576 | 0.9209 | 0.7448 | 0.8996 | 0.0645 |
| DNMT3B     | 0.8235 | 1.0366 | 0.9335 | 0.8049 | 0.8996 | 0.0538 |
| LOC728014  | 0.7792 | 1.2305 | 0.8150 | 0.7741 | 0.8997 | 0.1106 |
| C14orf156  | 0.8128 | 1.1535 | 0.9065 | 0.7261 | 0.8997 | 0.0923 |
| LOC649783  | 0.8093 | 1.0167 | 0.8947 | 0.8782 | 0.8997 | 0.0432 |
| LOC642666  | 0.8708 | 0.9697 | 0.9280 | 0.8304 | 0.8997 | 0.0307 |
| GULP1      | 0.6811 | 1.2960 | 0.9804 | 0.6417 | 0.8998 | 0.1522 |
| SPAG17     | 0.8125 | 0.9896 | 0.8769 | 0.9203 | 0.8998 | 0.0372 |
| DNAJC17    | 0.8444 | 1.1849 | 0.8305 | 0.7398 | 0.8999 | 0.0978 |
| DYRK2      | 0.7600 | 1.0145 | 1.0089 | 0.8162 | 0.8999 | 0.0656 |
| DECR2      | 0.6604 | 1.3522 | 0.9234 | 0.6636 | 0.8999 | 0.1629 |
| LOC390349  | 0.8394 | 0.9924 | 0.9541 | 0.8138 | 0.8999 | 0.0434 |
| LOC643894  | 0.8419 | 1.0129 | 0.9016 | 0.8433 | 0.8999 | 0.0401 |
| RNU105C    | 0.8453 | 0.8854 | 0.9071 | 0.9619 | 0.8999 | 0.0243 |
| LOC645435  | 0.8959 | 1.0124 | 0.8095 | 0.8821 | 0.9000 | 0.0420 |
| PNPT1      | 0.7078 | 1.2163 | 0.9348 | 0.7413 | 0.9000 | 0.1167 |
| LOC1001282 | 0.7867 | 1.0247 | 0.9862 | 0.8026 | 0.9000 | 0.0614 |
| LOC644745  | 0.6325 | 1.3078 | 0.9096 | 0.7505 | 0.9001 | 0.1473 |

|            |        |        |        |        |        |        |
|------------|--------|--------|--------|--------|--------|--------|
| PGBD4      | 0.8113 | 1.0231 | 0.9586 | 0.8075 | 0.9001 | 0.0540 |
| LOC1001309 | 0.7756 | 1.0513 | 0.9309 | 0.8427 | 0.9001 | 0.0596 |
| FLJ20699   | 0.8385 | 1.2806 | 0.7984 | 0.6831 | 0.9001 | 0.1310 |
| LOC286208  | 0.9290 | 1.0689 | 0.9036 | 0.6993 | 0.9002 | 0.0762 |
| RASAL3     | 0.6955 | 1.1577 | 0.8933 | 0.8543 | 0.9002 | 0.0959 |
| LOC1001339 | 0.7443 | 1.1463 | 1.0005 | 0.7098 | 0.9002 | 0.1046 |
| LOC642672  | 0.8432 | 0.9855 | 0.9262 | 0.8461 | 0.9002 | 0.0343 |
| GIT2       | 0.9142 | 0.9912 | 0.9882 | 0.7073 | 0.9002 | 0.0667 |
| ARL17B     | 0.8755 | 1.0897 | 0.8600 | 0.7757 | 0.9002 | 0.0669 |
| ULK3       | 0.8362 | 1.1004 | 0.8002 | 0.8644 | 0.9003 | 0.0680 |
| CHCHD2     | 0.8308 | 0.9852 | 0.9777 | 0.8076 | 0.9003 | 0.0471 |
| RALGAPA1   | 0.9089 | 1.0772 | 0.8783 | 0.7369 | 0.9003 | 0.0699 |
| LOC644638  | 0.9297 | 0.9624 | 1.0017 | 0.7076 | 0.9004 | 0.0659 |
| LOC441261  | 0.8113 | 0.9559 | 1.0308 | 0.8035 | 0.9004 | 0.0558 |
| LOC650111  | 0.7815 | 1.0780 | 0.8073 | 0.9351 | 0.9005 | 0.0680 |
| GPR17      | 0.8796 | 1.0072 | 0.8896 | 0.8257 | 0.9005 | 0.0382 |
| FAM60A     | 0.7759 | 1.1681 | 0.9592 | 0.6989 | 0.9005 | 0.1046 |
| MRPS33     | 0.7761 | 1.0651 | 1.0254 | 0.7354 | 0.9005 | 0.0844 |
| MGAT1      | 0.8185 | 1.1731 | 0.8944 | 0.7162 | 0.9006 | 0.0979 |
| LOC644195  | 0.8820 | 1.0133 | 0.8203 | 0.8868 | 0.9006 | 0.0405 |
| NUP133     | 0.7610 | 1.3397 | 0.8159 | 0.6857 | 0.9006 | 0.1488 |
| CHD2       | 0.8287 | 0.9881 | 0.9728 | 0.8129 | 0.9006 | 0.0463 |
| MEST       | 0.7782 | 1.0469 | 0.9800 | 0.7976 | 0.9007 | 0.0667 |
| FLJ35390   | 0.8473 | 1.0675 | 1.0011 | 0.6868 | 0.9007 | 0.0849 |
| ANKRD53    | 0.8334 | 0.9985 | 0.9718 | 0.7991 | 0.9007 | 0.0496 |
| LOC651774  | 0.9015 | 0.9038 | 0.9642 | 0.8334 | 0.9007 | 0.0267 |
| MIR618     | 0.9098 | 1.0895 | 0.7586 | 0.8449 | 0.9007 | 0.0701 |
| ERF        | 0.9706 | 1.0277 | 0.8456 | 0.7591 | 0.9007 | 0.0606 |
| FCN1       | 0.7809 | 1.0191 | 0.9040 | 0.8990 | 0.9007 | 0.0486 |
| TMEM34     | 0.7165 | 1.1691 | 0.9705 | 0.7469 | 0.9008 | 0.1059 |
| LOC654202  | 0.8283 | 0.8663 | 1.0032 | 0.9052 | 0.9008 | 0.0376 |
| ZNF584     | 0.7903 | 1.1863 | 0.8687 | 0.7580 | 0.9008 | 0.0980 |
| SYNGR4     | 0.8528 | 0.9767 | 0.8948 | 0.8789 | 0.9008 | 0.0267 |
| H2AFY      | 0.7164 | 1.1992 | 0.9966 | 0.6911 | 0.9008 | 0.1212 |
| LOC646858  | 0.8688 | 0.9880 | 0.9439 | 0.8029 | 0.9009 | 0.0409 |
| LOC729264  | 0.8405 | 1.1265 | 0.9544 | 0.6823 | 0.9009 | 0.0936 |
| LOC390874  | 0.8306 | 0.9609 | 0.9257 | 0.8866 | 0.9009 | 0.0279 |
| C2orf30    | 1.1098 | 1.0624 | 0.7552 | 0.6763 | 0.9009 | 0.1086 |
| HEXIM1     | 0.8204 | 1.0931 | 0.8961 | 0.7943 | 0.9010 | 0.0676 |
| GAGE4      | 0.8075 | 1.1309 | 0.9379 | 0.7277 | 0.9010 | 0.0880 |
| C1orf212   | 0.8579 | 0.9967 | 0.9198 | 0.8298 | 0.9010 | 0.0370 |
| HEPACAM    | 0.8435 | 1.0978 | 0.8998 | 0.7631 | 0.9011 | 0.0713 |
| PLEKHF1    | 0.7502 | 1.1698 | 0.7993 | 0.8851 | 0.9011 | 0.0938 |
| RRN3       | 0.7734 | 1.0439 | 1.0552 | 0.7318 | 0.9011 | 0.0862 |
| LOC643423  | 0.9021 | 0.9095 | 0.9649 | 0.8279 | 0.9011 | 0.0281 |
| LOC646527  | 0.7690 | 0.9535 | 1.2350 | 0.6468 | 0.9011 | 0.1279 |

|            |        |        |        |        |        |        |
|------------|--------|--------|--------|--------|--------|--------|
| ARIH1      | 0.8210 | 1.2013 | 0.9646 | 0.6176 | 0.9011 | 0.1228 |
| LOC642607  | 0.7241 | 0.9596 | 1.0532 | 0.8678 | 0.9012 | 0.0701 |
| RNPS1      | 0.8262 | 1.1700 | 0.8892 | 0.7193 | 0.9012 | 0.0962 |
| C10orf76   | 0.8988 | 1.1120 | 0.8753 | 0.7187 | 0.9012 | 0.0808 |
| LOC643905  | 0.8075 | 1.1585 | 0.8809 | 0.7581 | 0.9012 | 0.0894 |
| MTL5       | 0.8332 | 1.0149 | 0.9513 | 0.8054 | 0.9012 | 0.0494 |
| RNPC2      | 0.8200 | 1.0391 | 0.8862 | 0.8596 | 0.9012 | 0.0479 |
| PPAPDC1A   | 0.8236 | 0.9797 | 0.9822 | 0.8195 | 0.9012 | 0.0460 |
| NSUN3      | 0.6811 | 1.2886 | 0.9337 | 0.7018 | 0.9013 | 0.1412 |
| FAM90A19   | 0.8838 | 0.9296 | 0.8917 | 0.9002 | 0.9013 | 0.0100 |
| C12orf41   | 0.8138 | 1.1393 | 0.9383 | 0.7139 | 0.9013 | 0.0917 |
| LOC441493  | 0.8881 | 0.9079 | 0.9202 | 0.8893 | 0.9014 | 0.0077 |
| RNF214     | 0.8669 | 1.0278 | 0.8774 | 0.8335 | 0.9014 | 0.0432 |
| HIST3H3    | 0.9411 | 0.9604 | 0.9344 | 0.7698 | 0.9014 | 0.0442 |
| LOC1001287 | 0.7045 | 1.2585 | 1.0521 | 0.5904 | 0.9014 | 0.1543 |
| LOC642661  | 0.8166 | 0.9997 | 0.9842 | 0.8053 | 0.9014 | 0.0524 |
| LOC441131  | 0.7734 | 1.1713 | 0.9593 | 0.7019 | 0.9015 | 0.1050 |
| C7orf51    | 0.7810 | 1.0776 | 0.8972 | 0.8502 | 0.9015 | 0.0634 |
| TNFSF9     | 0.8308 | 1.0761 | 0.8560 | 0.8433 | 0.9015 | 0.0584 |
| CDKN2AIP   | 0.6590 | 1.1597 | 1.0156 | 0.7718 | 0.9015 | 0.1138 |
| ATG12      | 0.7491 | 1.2511 | 0.9413 | 0.6647 | 0.9016 | 0.1301 |
| TMCO7      | 0.8182 | 1.0285 | 0.9607 | 0.7988 | 0.9016 | 0.0556 |
| PPFIA3     | 0.9097 | 0.9914 | 0.8625 | 0.8426 | 0.9016 | 0.0331 |
| RABL3      | 0.6311 | 1.2884 | 0.9580 | 0.7288 | 0.9016 | 0.1460 |
| CLRN1      | 0.7687 | 1.1317 | 0.9306 | 0.7753 | 0.9016 | 0.0853 |
| LOC1001345 | 0.8799 | 0.9680 | 0.9395 | 0.8190 | 0.9016 | 0.0331 |
| EXOG       | 0.7436 | 1.0799 | 0.9505 | 0.8325 | 0.9016 | 0.0730 |
| PUM2       | 0.8373 | 1.2156 | 0.7966 | 0.7570 | 0.9016 | 0.1059 |
| RAD51L1    | 0.8361 | 0.9646 | 0.9711 | 0.8348 | 0.9017 | 0.0382 |
| SNORA68    | 0.7171 | 1.0822 | 1.0330 | 0.7743 | 0.9017 | 0.0913 |
| LOC402096  | 0.8463 | 0.9786 | 0.9360 | 0.8458 | 0.9017 | 0.0333 |
| C6orf168   | 0.8172 | 1.0645 | 0.9197 | 0.8054 | 0.9017 | 0.0600 |
| IHH        | 0.8373 | 1.0048 | 0.9756 | 0.7892 | 0.9017 | 0.0523 |
| LOC643262  | 0.9383 | 0.9638 | 0.8973 | 0.8075 | 0.9017 | 0.0343 |
| FOXJ2      | 0.7830 | 1.2399 | 0.8753 | 0.7088 | 0.9018 | 0.1177 |
| C14orf138  | 0.8045 | 1.0804 | 0.9174 | 0.8048 | 0.9018 | 0.0652 |
| WDR89      | 0.8136 | 1.0208 | 0.9360 | 0.8367 | 0.9018 | 0.0478 |
| COX10      | 0.6562 | 1.2057 | 0.9696 | 0.7757 | 0.9018 | 0.1201 |
| ATG4D      | 0.8210 | 1.0598 | 0.9443 | 0.7821 | 0.9018 | 0.0630 |
| PMS2L5     | 0.7465 | 1.2327 | 0.9395 | 0.6886 | 0.9018 | 0.1226 |
| C1orf216   | 0.8142 | 1.1834 | 0.8735 | 0.7363 | 0.9018 | 0.0980 |
| LOC731227  | 0.9122 | 0.9207 | 0.9721 | 0.8023 | 0.9018 | 0.0357 |
| MTBP       | 0.8761 | 1.0305 | 0.9016 | 0.7993 | 0.9019 | 0.0481 |
| LOC128102  | 0.7817 | 1.0231 | 0.9685 | 0.8342 | 0.9019 | 0.0564 |
| TMEM214    | 0.8453 | 1.1989 | 0.8322 | 0.7313 | 0.9019 | 0.1022 |
| POLR2K     | 0.9378 | 1.0430 | 0.8137 | 0.8132 | 0.9019 | 0.0554 |



|            |        |        |        |        |        |        |
|------------|--------|--------|--------|--------|--------|--------|
| LOC652067  | 0.6641 | 1.0800 | 0.9267 | 0.9369 | 0.9019 | 0.0866 |
| ZNF256     | 0.7737 | 1.0968 | 0.9874 | 0.7499 | 0.9020 | 0.0841 |
| LOC641700  | 0.8537 | 0.9533 | 1.0154 | 0.7854 | 0.9020 | 0.0512 |
| LOC169834  | 0.8150 | 1.0351 | 1.0342 | 0.7236 | 0.9020 | 0.0789 |
| ERLIN2     | 0.8785 | 1.0148 | 0.9601 | 0.7545 | 0.9020 | 0.0566 |
| LAMA1      | 0.7801 | 1.0248 | 0.9589 | 0.8441 | 0.9020 | 0.0552 |
| LOC1001284 | 0.8602 | 1.0276 | 0.9523 | 0.7679 | 0.9020 | 0.0563 |
| P2RX6P     | 0.7848 | 1.0742 | 0.9162 | 0.8328 | 0.9020 | 0.0635 |
| LOC729234  | 0.9040 | 1.0393 | 0.8497 | 0.8151 | 0.9020 | 0.0493 |
| EGFL7      | 0.8532 | 1.0036 | 0.8885 | 0.8630 | 0.9021 | 0.0346 |
| LOC730340  | 0.8454 | 1.0987 | 0.8934 | 0.7708 | 0.9021 | 0.0702 |
| CLDN23     | 0.6984 | 1.3593 | 0.8176 | 0.7331 | 0.9021 | 0.1544 |
| RTKN2      | 0.7095 | 1.0397 | 1.0466 | 0.8125 | 0.9021 | 0.0841 |
| ZNF280C    | 0.7968 | 1.1857 | 0.8299 | 0.7960 | 0.9021 | 0.0949 |
| LZTS2      | 0.9506 | 0.9413 | 0.9420 | 0.7746 | 0.9021 | 0.0425 |
| BOK        | 0.8109 | 1.0725 | 0.9971 | 0.7284 | 0.9022 | 0.0799 |
| ALG1L      | 0.8149 | 1.0241 | 0.8991 | 0.8707 | 0.9022 | 0.0442 |
| MGST2      | 0.7695 | 1.1545 | 0.9112 | 0.7738 | 0.9022 | 0.0903 |
| FLNA       | 0.6350 | 1.0714 | 1.0361 | 0.8664 | 0.9022 | 0.0997 |
| LOC402145  | 0.8030 | 0.9408 | 0.9926 | 0.8727 | 0.9022 | 0.0412 |
| ZC3HC1     | 0.8091 | 1.1390 | 1.0025 | 0.6583 | 0.9023 | 0.1058 |
| NFKB2      | 0.8107 | 1.0318 | 0.9365 | 0.8300 | 0.9023 | 0.0513 |
| RILP       | 0.8273 | 1.1489 | 0.8108 | 0.8221 | 0.9023 | 0.0823 |
| ZNF454     | 0.7933 | 1.1003 | 0.9840 | 0.7315 | 0.9023 | 0.0851 |
| UCK1       | 0.9635 | 1.1311 | 0.7818 | 0.7331 | 0.9024 | 0.0909 |
| DPH3       | 0.7668 | 1.1498 | 0.9425 | 0.7504 | 0.9024 | 0.0932 |
| LOC144776  | 0.9133 | 0.8905 | 0.9181 | 0.8876 | 0.9024 | 0.0078 |
| LOC642165  | 0.7597 | 1.0541 | 0.9867 | 0.8091 | 0.9024 | 0.0702 |
| LOC1001310 | 0.8707 | 1.0620 | 0.9781 | 0.6990 | 0.9024 | 0.0783 |
| LOC1001279 | 0.8669 | 1.0724 | 0.9216 | 0.7488 | 0.9024 | 0.0672 |
| LOC647037  | 0.8107 | 1.0496 | 1.0709 | 0.6787 | 0.9025 | 0.0951 |
| MXRA5      | 0.9097 | 1.0057 | 0.7603 | 0.9343 | 0.9025 | 0.0516 |
| TJP1       | 0.7965 | 1.2440 | 0.8791 | 0.6904 | 0.9025 | 0.1202 |
| LOC1001288 | 0.8581 | 0.9781 | 0.8970 | 0.8768 | 0.9025 | 0.0264 |
| LOC1001296 | 0.8593 | 0.8873 | 1.0188 | 0.8447 | 0.9025 | 0.0398 |
| NDUFB1     | 0.6796 | 1.0218 | 0.9396 | 0.9691 | 0.9025 | 0.0762 |
| CAPZA1     | 0.7757 | 1.0014 | 0.9773 | 0.8557 | 0.9025 | 0.0530 |
| LOC392489  | 0.8333 | 1.1069 | 0.8532 | 0.8167 | 0.9025 | 0.0685 |
| TPRX1      | 0.9346 | 0.9157 | 0.9051 | 0.8547 | 0.9025 | 0.0171 |
| DEFB112    | 0.8362 | 0.8977 | 1.0103 | 0.8660 | 0.9026 | 0.0380 |
| RNU86      | 0.7866 | 1.0932 | 0.8458 | 0.8847 | 0.9026 | 0.0667 |
| BEX1       | 0.7201 | 1.1799 | 1.0401 | 0.6704 | 0.9026 | 0.1235 |
| LOC1001308 | 0.8380 | 0.9667 | 0.9787 | 0.8271 | 0.9026 | 0.0406 |
| LOC648174  | 0.8404 | 0.9122 | 0.9809 | 0.8770 | 0.9026 | 0.0299 |
| DNAJC5     | 0.7904 | 1.1847 | 0.9004 | 0.7351 | 0.9026 | 0.1001 |
| KRTAP12-2  | 0.8653 | 0.9213 | 0.9835 | 0.8405 | 0.9027 | 0.0318 |

|            |        |        |        |        |        |        |
|------------|--------|--------|--------|--------|--------|--------|
| ZNF799     | 0.8262 | 0.8629 | 1.1095 | 0.8121 | 0.9027 | 0.0698 |
| MFSD8      | 0.7090 | 1.0724 | 1.0588 | 0.7705 | 0.9027 | 0.0950 |
| ZNF519     | 0.8260 | 0.9491 | 0.9332 | 0.9025 | 0.9027 | 0.0273 |
| XRCC1      | 0.8077 | 1.1586 | 0.9924 | 0.6522 | 0.9027 | 0.1100 |
| GABPB1     | 0.8259 | 1.0207 | 0.9978 | 0.7666 | 0.9027 | 0.0628 |
| PTPRZ1     | 0.9023 | 0.9402 | 0.9358 | 0.8327 | 0.9028 | 0.0248 |
| SEC16A     | 0.7616 | 1.3773 | 0.7704 | 0.7017 | 0.9028 | 0.1589 |
| PDE6B      | 0.7903 | 1.0271 | 0.9126 | 0.8811 | 0.9028 | 0.0489 |
| DNAJC16    | 0.6564 | 1.0890 | 0.9678 | 0.8980 | 0.9028 | 0.0911 |
| FOXI2      | 0.8840 | 0.9219 | 0.8932 | 0.9121 | 0.9028 | 0.0086 |
| MAP2K2     | 0.8427 | 1.2811 | 0.7925 | 0.6949 | 0.9028 | 0.1298 |
| ZNF829     | 0.8859 | 0.9495 | 0.9546 | 0.8213 | 0.9028 | 0.0314 |
| FLJ12688   | 0.8128 | 1.0625 | 0.9279 | 0.8080 | 0.9028 | 0.0600 |
| FLVCR1     | 0.7311 | 1.0462 | 1.0973 | 0.7369 | 0.9028 | 0.0981 |
| ZNF860     | 0.8268 | 0.8176 | 0.9786 | 0.9884 | 0.9029 | 0.0466 |
| LOC648603  | 0.8349 | 1.0595 | 0.8493 | 0.8678 | 0.9029 | 0.0526 |
| PHLPP2     | 0.5920 | 1.1612 | 1.1160 | 0.7424 | 0.9029 | 0.1398 |
| GABRB3     | 0.7867 | 1.0937 | 0.9204 | 0.8109 | 0.9029 | 0.0699 |
| HDAC3      | 0.8084 | 1.3131 | 0.8153 | 0.6749 | 0.9029 | 0.1405 |
| NPIP       | 0.9387 | 0.9598 | 0.8419 | 0.8714 | 0.9029 | 0.0277 |
| ABHD3      | 0.8262 | 1.1106 | 0.9598 | 0.7152 | 0.9030 | 0.0854 |
| KRR1       | 0.6745 | 1.1189 | 0.9907 | 0.8277 | 0.9030 | 0.0967 |
| LOC1001330 | 0.9586 | 0.9295 | 0.8458 | 0.8781 | 0.9030 | 0.0253 |
| UGT2B28    | 0.7693 | 1.1649 | 1.0568 | 0.6211 | 0.9030 | 0.1257 |
| PTPRE      | 0.8807 | 1.0363 | 0.9124 | 0.7826 | 0.9030 | 0.0523 |
| LOC653265  | 0.8728 | 0.9855 | 0.9313 | 0.8224 | 0.9030 | 0.0354 |
| GLT1D1     | 0.8423 | 1.0377 | 0.9093 | 0.8228 | 0.9030 | 0.0486 |
| LOC732432  | 0.5974 | 1.3881 | 0.9160 | 0.7105 | 0.9030 | 0.1746 |
| LOC729362  | 0.5958 | 1.0985 | 1.2111 | 0.7068 | 0.9030 | 0.1489 |
| ZNF550     | 0.8397 | 1.0128 | 0.9616 | 0.7981 | 0.9030 | 0.0504 |
| EIF3I      | 0.7433 | 1.2328 | 0.9117 | 0.7244 | 0.9031 | 0.1177 |
| SNORA84    | 0.6890 | 1.1796 | 0.8909 | 0.8528 | 0.9031 | 0.1020 |
| FAM183A    | 0.8499 | 0.8944 | 1.0283 | 0.8399 | 0.9031 | 0.0434 |
| KLHL12     | 0.6862 | 1.3044 | 0.9339 | 0.6881 | 0.9032 | 0.1459 |
| C12orf76   | 0.8416 | 1.2797 | 0.8117 | 0.6798 | 0.9032 | 0.1303 |
| MAST2      | 0.8152 | 0.9368 | 0.9764 | 0.8844 | 0.9032 | 0.0349 |
| NMRAL1     | 0.7610 | 1.3336 | 0.9102 | 0.6082 | 0.9032 | 0.1561 |
| C7orf60    | 0.9499 | 0.9546 | 0.9261 | 0.7823 | 0.9032 | 0.0408 |
| GAGE12G    | 0.8320 | 1.0951 | 0.9250 | 0.7609 | 0.9032 | 0.0722 |
| CSTF1      | 0.7311 | 1.1747 | 0.9324 | 0.7749 | 0.9033 | 0.1003 |
| POLR3F     | 0.9608 | 0.9934 | 1.0099 | 0.6490 | 0.9033 | 0.0854 |
| WASH3P     | 0.8350 | 0.9542 | 0.9375 | 0.8865 | 0.9033 | 0.0269 |
| DPF2       | 0.7883 | 1.3093 | 0.8392 | 0.6765 | 0.9033 | 0.1395 |
| SGPP2      | 0.8053 | 1.0171 | 1.0067 | 0.7842 | 0.9033 | 0.0629 |
| MIR34B     | 0.9263 | 0.8447 | 0.9792 | 0.8631 | 0.9033 | 0.0307 |
| LOC642765  | 0.7799 | 1.0660 | 0.8837 | 0.8836 | 0.9033 | 0.0595 |

|            |        |        |        |        |        |        |
|------------|--------|--------|--------|--------|--------|--------|
| CHM        | 0.7917 | 1.0809 | 1.0146 | 0.7262 | 0.9034 | 0.0855 |
| LOC648196  | 0.9576 | 0.9754 | 0.9039 | 0.7765 | 0.9034 | 0.0449 |
| RBM6       | 0.9207 | 1.0935 | 0.8150 | 0.7842 | 0.9034 | 0.0698 |
| PIK3R2     | 0.8303 | 1.1621 | 0.9433 | 0.6779 | 0.9034 | 0.1019 |
| FLJ38576   | 0.7666 | 1.1052 | 0.9483 | 0.7935 | 0.9034 | 0.0783 |
| DCTN3      | 0.9033 | 1.1174 | 0.9765 | 0.6164 | 0.9034 | 0.1055 |
| KIAA0251   | 0.7682 | 1.1902 | 0.8626 | 0.7926 | 0.9034 | 0.0977 |
| LOC653429  | 0.7584 | 0.9609 | 1.0315 | 0.8631 | 0.9035 | 0.0594 |
| HIST1H1B   | 0.8066 | 0.9371 | 0.9831 | 0.8871 | 0.9035 | 0.0378 |
| SLC7A6OS   | 0.7147 | 1.1528 | 0.7988 | 0.9477 | 0.9035 | 0.0960 |
| BSPRY      | 0.7770 | 1.1802 | 0.8982 | 0.7586 | 0.9035 | 0.0973 |
| LOC643452  | 0.8500 | 0.9630 | 1.0370 | 0.7641 | 0.9035 | 0.0603 |
| RDH14      | 0.7567 | 1.2875 | 0.9111 | 0.6588 | 0.9035 | 0.1381 |
| C17orf75   | 0.8641 | 1.0442 | 0.8952 | 0.8107 | 0.9035 | 0.0500 |
| LOC442501  | 0.8342 | 0.9775 | 0.9619 | 0.8406 | 0.9035 | 0.0383 |
| KRTAP11-1  | 0.8401 | 0.9598 | 0.9260 | 0.8883 | 0.9036 | 0.0257 |
| SEPN1      | 0.7792 | 1.1437 | 0.9417 | 0.7498 | 0.9036 | 0.0905 |
| LOC652726  | 0.7494 | 1.0838 | 1.0258 | 0.7554 | 0.9036 | 0.0881 |
| LOC643980  | 0.8816 | 0.9827 | 0.9956 | 0.7545 | 0.9036 | 0.0558 |
| LOC651621  | 0.8032 | 1.2420 | 0.8753 | 0.6939 | 0.9036 | 0.1188 |
| DNAJB14    | 0.8431 | 1.0630 | 1.0147 | 0.6936 | 0.9036 | 0.0844 |
| IL10       | 0.6682 | 1.2411 | 0.9378 | 0.7674 | 0.9036 | 0.1255 |
| LOC728969  | 0.8411 | 1.0929 | 0.8736 | 0.8070 | 0.9037 | 0.0645 |
| SSNA1      | 1.0177 | 1.0925 | 0.7799 | 0.7245 | 0.9037 | 0.0895 |
| LOC650028  | 0.8872 | 1.1386 | 0.7837 | 0.8052 | 0.9037 | 0.0814 |
| C2orf63    | 0.8933 | 1.0968 | 0.8552 | 0.7694 | 0.9037 | 0.0694 |
| LOC652417  | 0.8581 | 1.0619 | 0.8065 | 0.8882 | 0.9037 | 0.0554 |
| MESTIT1    | 0.8623 | 1.0214 | 0.7828 | 0.9483 | 0.9037 | 0.0518 |
| SRRM2      | 0.7757 | 1.1703 | 0.9215 | 0.7473 | 0.9037 | 0.0967 |
| NCOA6IP    | 0.8235 | 1.0371 | 0.9188 | 0.8356 | 0.9037 | 0.0492 |
| METTL4     | 0.8510 | 1.0893 | 0.8366 | 0.8381 | 0.9037 | 0.0619 |
| TRMT12     | 0.7997 | 1.1326 | 0.9836 | 0.6992 | 0.9038 | 0.0964 |
| LOC1001302 | 0.8659 | 1.0411 | 0.8993 | 0.8087 | 0.9038 | 0.0495 |
| HSPA12A    | 0.8323 | 1.0142 | 0.9295 | 0.8391 | 0.9038 | 0.0430 |
| LOC729764  | 0.6964 | 1.2689 | 0.9114 | 0.7388 | 0.9039 | 0.1303 |
| SCARF2     | 0.8903 | 0.9978 | 0.9592 | 0.7683 | 0.9039 | 0.0504 |
| C10orf58   | 0.7604 | 1.0604 | 1.0438 | 0.7509 | 0.9039 | 0.0857 |
| IPO11      | 0.7200 | 1.3026 | 0.8534 | 0.7396 | 0.9039 | 0.1361 |
| CRIPAK     | 0.8406 | 1.2120 | 0.7701 | 0.7929 | 0.9039 | 0.1037 |
| GOT1       | 0.7204 | 1.0912 | 1.0240 | 0.7801 | 0.9039 | 0.0906 |
| MIR188     | 0.8799 | 0.8043 | 1.0671 | 0.8643 | 0.9039 | 0.0568 |
| AMFR       | 0.7536 | 1.1669 | 1.0034 | 0.6920 | 0.9040 | 0.1105 |
| AGPAT3     | 0.8712 | 1.0507 | 0.8906 | 0.8035 | 0.9040 | 0.0523 |
| LOC1001313 | 0.8940 | 1.0229 | 0.8326 | 0.8667 | 0.9040 | 0.0416 |
| SF3A1      | 0.7709 | 1.0767 | 0.9923 | 0.7763 | 0.9040 | 0.0773 |
| RNFT2      | 0.8004 | 1.1485 | 0.8594 | 0.8079 | 0.9040 | 0.0825 |

|            |        |        |        |        |        |        |
|------------|--------|--------|--------|--------|--------|--------|
| GAF2       | 0.8400 | 0.9264 | 0.9602 | 0.8898 | 0.9041 | 0.0258 |
| LOC729655  | 0.8937 | 1.0757 | 0.8905 | 0.7566 | 0.9041 | 0.0655 |
| CD2        | 0.9187 | 0.8856 | 0.9510 | 0.8613 | 0.9041 | 0.0196 |
| RAG1       | 0.7921 | 1.1372 | 0.8942 | 0.7932 | 0.9042 | 0.0813 |
| UPRT       | 0.8174 | 1.1464 | 0.9316 | 0.7212 | 0.9042 | 0.0915 |
| LOC642662  | 0.9939 | 0.8832 | 0.9356 | 0.8040 | 0.9042 | 0.0403 |
| GIN1       | 0.8442 | 1.0738 | 0.9675 | 0.7313 | 0.9042 | 0.0743 |
| LOC651576  | 0.8048 | 1.0587 | 0.9706 | 0.7825 | 0.9042 | 0.0664 |
| MAPK1      | 0.7769 | 1.1571 | 0.9226 | 0.7601 | 0.9042 | 0.0919 |
| PPFIBP1    | 0.7490 | 1.0639 | 0.9906 | 0.8133 | 0.9042 | 0.0738 |
| SNORD42A   | 0.8053 | 0.9845 | 1.0003 | 0.8267 | 0.9042 | 0.0512 |
| PADI2      | 0.8578 | 1.0783 | 0.9478 | 0.7330 | 0.9042 | 0.0728 |
| LOC1001292 | 0.8328 | 1.1330 | 0.8954 | 0.7557 | 0.9042 | 0.0814 |
| TUBGCP6    | 0.8668 | 1.0040 | 0.8903 | 0.8559 | 0.9042 | 0.0340 |
| MAN2A2     | 0.9269 | 1.0021 | 0.8744 | 0.8135 | 0.9042 | 0.0400 |
| C17orf88   | 0.8759 | 1.0051 | 0.9950 | 0.7411 | 0.9043 | 0.0618 |
| LOC91431   | 0.8725 | 0.9708 | 0.8873 | 0.8864 | 0.9043 | 0.0224 |
| PIGX       | 0.8286 | 1.1146 | 0.8523 | 0.8218 | 0.9043 | 0.0704 |
| BCL10      | 0.7249 | 1.0839 | 1.0229 | 0.7855 | 0.9043 | 0.0879 |
| LOC1001327 | 0.8956 | 1.0011 | 0.9203 | 0.8002 | 0.9043 | 0.0414 |
| PTP4A1     | 0.9108 | 0.9644 | 1.0827 | 0.6593 | 0.9043 | 0.0892 |
| ABCB6      | 0.7258 | 1.2637 | 0.9988 | 0.6290 | 0.9043 | 0.1431 |
| LOC391742  | 0.7439 | 1.0638 | 0.9837 | 0.8258 | 0.9043 | 0.0728 |
| NCKAP1     | 0.7336 | 1.2465 | 0.8726 | 0.7645 | 0.9043 | 0.1179 |
| MREG       | 0.7094 | 1.1028 | 0.8819 | 0.9232 | 0.9043 | 0.0807 |
| LOC650681  | 0.8909 | 1.0737 | 0.9844 | 0.6685 | 0.9044 | 0.0870 |
| CREBL1     | 0.8991 | 1.0592 | 0.8981 | 0.7611 | 0.9044 | 0.0609 |
| LOC652139  | 0.7305 | 0.9793 | 1.0191 | 0.8886 | 0.9044 | 0.0641 |
| LOC652389  | 0.8531 | 1.0160 | 0.9555 | 0.7931 | 0.9044 | 0.0501 |
| LOC1001324 | 0.6777 | 0.9836 | 0.9125 | 1.0440 | 0.9044 | 0.0802 |
| ZNF791     | 0.8301 | 0.9888 | 1.0462 | 0.7526 | 0.9044 | 0.0682 |
| SNORD12B   | 0.9422 | 0.8360 | 0.8918 | 0.9478 | 0.9044 | 0.0261 |
| KIAA0831   | 0.7325 | 1.1506 | 1.0041 | 0.7306 | 0.9044 | 0.1042 |
| LOC648775  | 0.8940 | 1.0285 | 0.9323 | 0.7630 | 0.9045 | 0.0550 |
| LOC283174  | 0.8555 | 1.0324 | 0.9423 | 0.7877 | 0.9045 | 0.0531 |
| LOC1001343 | 0.8293 | 1.0348 | 0.9069 | 0.8471 | 0.9045 | 0.0465 |
| RPAP1      | 0.9297 | 1.0754 | 0.8605 | 0.7526 | 0.9045 | 0.0676 |
| PLEKHA7    | 0.8871 | 1.0463 | 0.9026 | 0.7822 | 0.9046 | 0.0543 |
| C16orf88   | 0.9786 | 0.8892 | 0.9604 | 0.7901 | 0.9046 | 0.0427 |
| SLC48A1    | 0.6984 | 1.1579 | 0.9119 | 0.8501 | 0.9046 | 0.0956 |
| SHPRH      | 0.8885 | 1.0915 | 0.8967 | 0.7416 | 0.9046 | 0.0718 |
| LOC728476  | 0.7418 | 1.2556 | 0.8525 | 0.7685 | 0.9046 | 0.1193 |
| UBL4B      | 0.8438 | 1.0239 | 0.9217 | 0.8293 | 0.9046 | 0.0446 |
| CCDC101    | 0.8284 | 1.1121 | 0.9028 | 0.7753 | 0.9047 | 0.0739 |
| MTCH1      | 0.8134 | 1.2578 | 0.8790 | 0.6686 | 0.9047 | 0.1256 |
| CHST13     | 0.9153 | 1.0498 | 0.8547 | 0.7990 | 0.9047 | 0.0539 |

|            |        |        |        |        |        |        |
|------------|--------|--------|--------|--------|--------|--------|
| APTX       | 0.7681 | 1.2045 | 1.0027 | 0.6437 | 0.9047 | 0.1246 |
| LOC441205  | 0.9886 | 0.9306 | 0.8525 | 0.8472 | 0.9047 | 0.0338 |
| SDHA       | 0.7335 | 1.4051 | 0.8535 | 0.6269 | 0.9047 | 0.1731 |
| GCSH       | 0.6699 | 1.2898 | 0.9302 | 0.7291 | 0.9047 | 0.1399 |
| LOC643854  | 0.8616 | 1.0221 | 0.8686 | 0.8668 | 0.9047 | 0.0391 |
| LOC651407  | 0.8244 | 1.0008 | 0.9614 | 0.8324 | 0.9048 | 0.0448 |
| NPHP4      | 0.8039 | 1.1778 | 0.8189 | 0.8184 | 0.9048 | 0.0911 |
| SPIN2A     | 0.9650 | 1.0000 | 0.9507 | 0.7032 | 0.9048 | 0.0680 |
| ATP6V1B1   | 0.7850 | 1.1379 | 0.8796 | 0.8166 | 0.9048 | 0.0802 |
| NDNL2      | 0.9124 | 0.9424 | 0.9494 | 0.8150 | 0.9048 | 0.0310 |
| FLJ40292   | 0.9366 | 0.9777 | 0.8886 | 0.8163 | 0.9048 | 0.0347 |
| LOC728953  | 0.7692 | 1.0788 | 0.9361 | 0.8352 | 0.9048 | 0.0674 |
| MAGEA2     | 0.8628 | 1.0525 | 0.9176 | 0.7865 | 0.9048 | 0.0561 |
| LOC643888  | 0.8407 | 1.2707 | 0.9018 | 0.6063 | 0.9049 | 0.1376 |
| EFHA1      | 0.7610 | 0.9410 | 1.2026 | 0.7148 | 0.9049 | 0.1106 |
| LOC1001327 | 0.8458 | 1.1111 | 0.8450 | 0.8176 | 0.9049 | 0.0690 |
| SYT3       | 0.8650 | 1.0747 | 0.8257 | 0.8542 | 0.9049 | 0.0572 |
| RFESD      | 0.8658 | 1.0399 | 0.9359 | 0.7781 | 0.9049 | 0.0554 |
| HMGB1      | 0.7961 | 0.9526 | 1.0543 | 0.8168 | 0.9049 | 0.0607 |
| METTL9     | 0.8715 | 0.9369 | 0.9658 | 0.8457 | 0.9050 | 0.0279 |
| LOC85391   | 0.8243 | 0.8862 | 1.0968 | 0.8125 | 0.9050 | 0.0660 |
| NBPF14     | 0.7909 | 1.0761 | 0.8486 | 0.9043 | 0.9050 | 0.0616 |
| LOC1001341 | 0.8446 | 0.9654 | 1.0013 | 0.8087 | 0.9050 | 0.0464 |
| IAH1       | 0.6566 | 1.3307 | 0.9407 | 0.6919 | 0.9050 | 0.1554 |
| RGS14      | 0.8269 | 1.0069 | 0.8927 | 0.8935 | 0.9050 | 0.0374 |
| C14orf101  | 0.6861 | 1.1222 | 1.1561 | 0.6557 | 0.9050 | 0.1355 |
| PTAFR      | 0.7084 | 1.1580 | 0.9258 | 0.8280 | 0.9050 | 0.0953 |
| SNORD1A    | 0.7633 | 0.9533 | 1.0289 | 0.8748 | 0.9051 | 0.0568 |
| TMEM150C   | 0.9048 | 0.9289 | 0.9427 | 0.8439 | 0.9051 | 0.0219 |
| SNORD38A   | 0.7637 | 0.9816 | 1.0212 | 0.8538 | 0.9051 | 0.0591 |
| DVL2       | 0.9377 | 1.1176 | 0.8253 | 0.7397 | 0.9051 | 0.0816 |
| SNORA3     | 0.7271 | 1.1373 | 0.9695 | 0.7864 | 0.9051 | 0.0930 |
| SNORD46    | 0.7760 | 0.9990 | 1.0142 | 0.8311 | 0.9051 | 0.0598 |
| WHSC1      | 0.8332 | 0.9991 | 0.9496 | 0.8387 | 0.9051 | 0.0412 |
| EPOR       | 0.8813 | 1.0549 | 0.9345 | 0.7499 | 0.9051 | 0.0632 |
| SERPINA5   | 0.9211 | 1.0994 | 1.0077 | 0.5925 | 0.9052 | 0.1104 |
| OR4N4      | 0.8240 | 0.8808 | 1.0110 | 0.9049 | 0.9052 | 0.0391 |
| ZNF460     | 0.8558 | 1.0376 | 0.8530 | 0.8744 | 0.9052 | 0.0444 |
| FSD1CL     | 0.8426 | 0.9574 | 0.9795 | 0.8413 | 0.9052 | 0.0368 |
| TRIM21     | 0.8258 | 1.0414 | 1.0096 | 0.7440 | 0.9052 | 0.0717 |
| LOC652610  | 0.7938 | 0.8910 | 0.9852 | 0.9508 | 0.9052 | 0.0419 |
| C13orf15   | 0.7019 | 1.1667 | 1.0780 | 0.6744 | 0.9053 | 0.1268 |
| SLC15A4    | 0.8326 | 1.1345 | 0.9168 | 0.7371 | 0.9053 | 0.0848 |
| LOC644294  | 0.8767 | 0.9359 | 0.8872 | 0.9213 | 0.9053 | 0.0140 |
| LOC642947  | 0.7544 | 1.1676 | 0.9711 | 0.7280 | 0.9053 | 0.1030 |
| AGR2       | 0.8329 | 0.9336 | 1.0861 | 0.7686 | 0.9053 | 0.0692 |

|            |        |        |        |        |        |        |
|------------|--------|--------|--------|--------|--------|--------|
| TTF1       | 0.9296 | 0.9655 | 0.9532 | 0.7728 | 0.9053 | 0.0448 |
| SCARB2     | 0.8934 | 1.2215 | 0.7882 | 0.7182 | 0.9053 | 0.1114 |
| FAM14B     | 1.0316 | 0.9219 | 0.9515 | 0.7163 | 0.9053 | 0.0671 |
| C22orf24   | 0.7686 | 0.9435 | 0.9637 | 0.9456 | 0.9053 | 0.0458 |
| MIR16-1    | 0.9551 | 0.9252 | 0.8465 | 0.8946 | 0.9053 | 0.0232 |
| IL4R       | 0.7684 | 0.9921 | 0.9691 | 0.8918 | 0.9054 | 0.0504 |
| SART3      | 0.7909 | 1.1105 | 0.9829 | 0.7374 | 0.9054 | 0.0863 |
| ZNF835     | 0.8898 | 0.9396 | 0.9718 | 0.8206 | 0.9054 | 0.0329 |
| LOC553158  | 0.7646 | 1.1167 | 0.9587 | 0.7818 | 0.9054 | 0.0830 |
| C14orf181  | 0.8033 | 1.1074 | 0.7980 | 0.9130 | 0.9054 | 0.0724 |
| SNORD1B    | 0.8396 | 0.9734 | 0.9304 | 0.8784 | 0.9054 | 0.0293 |
| ENTPD4     | 0.5918 | 1.4198 | 0.8130 | 0.7973 | 0.9055 | 0.1787 |
| LOC652235  | 0.8662 | 0.9952 | 0.9889 | 0.7718 | 0.9055 | 0.0535 |
| GJB2       | 0.8225 | 1.0088 | 0.9268 | 0.8640 | 0.9055 | 0.0406 |
| LOC728806  | 0.8337 | 1.0453 | 0.8619 | 0.8813 | 0.9056 | 0.0476 |
| ANKRD35    | 0.7149 | 1.0717 | 0.9213 | 0.9145 | 0.9056 | 0.0732 |
| FALZ       | 0.8042 | 1.0327 | 0.9506 | 0.8348 | 0.9056 | 0.0528 |
| AGPS       | 0.6849 | 1.3224 | 0.8753 | 0.7399 | 0.9056 | 0.1446 |
| LOC731751  | 0.8105 | 1.0723 | 1.0402 | 0.6995 | 0.9056 | 0.0901 |
| FBXL22     | 0.8853 | 1.1856 | 0.8625 | 0.6891 | 0.9056 | 0.1031 |
| LOC645173  | 0.7122 | 1.1734 | 1.0257 | 0.7112 | 0.9056 | 0.1159 |
| LOC649469  | 0.8335 | 0.9633 | 1.0867 | 0.7391 | 0.9056 | 0.0759 |
| LOC652224  | 0.8656 | 0.8979 | 0.9371 | 0.9219 | 0.9056 | 0.0156 |
| LOC1001345 | 0.7990 | 0.8758 | 1.0884 | 0.8597 | 0.9057 | 0.0631 |
| PKP3       | 0.8528 | 1.1107 | 0.8865 | 0.7729 | 0.9057 | 0.0723 |
| HIP1       | 0.7937 | 1.0676 | 0.9246 | 0.8369 | 0.9057 | 0.0604 |
| SRP9       | 0.9066 | 1.0598 | 0.9709 | 0.6858 | 0.9057 | 0.0798 |
| FOXD2      | 0.7757 | 1.0761 | 0.8656 | 0.9059 | 0.9058 | 0.0629 |
| TTC27      | 0.8571 | 1.0725 | 0.9861 | 0.7077 | 0.9058 | 0.0795 |
| MPV17L2    | 0.7439 | 1.1666 | 0.9548 | 0.7581 | 0.9059 | 0.0994 |
| LOC1001346 | 0.8609 | 0.9941 | 0.9470 | 0.8215 | 0.9059 | 0.0394 |
| LOC1001293 | 0.8115 | 1.0429 | 1.0178 | 0.7514 | 0.9059 | 0.0731 |
| REST       | 0.8247 | 0.9211 | 0.9373 | 0.9405 | 0.9059 | 0.0274 |
| SOD2       | 0.8027 | 1.0634 | 0.9349 | 0.8227 | 0.9059 | 0.0600 |
| MIR1180    | 0.8825 | 0.9233 | 0.9719 | 0.8460 | 0.9059 | 0.0271 |
| LOC441249  | 1.0037 | 0.9810 | 0.9141 | 0.7248 | 0.9059 | 0.0633 |
| LOC1001344 | 0.8366 | 1.0057 | 0.9908 | 0.7906 | 0.9059 | 0.0542 |
| PEX7       | 0.6866 | 1.3292 | 0.9971 | 0.6108 | 0.9059 | 0.1640 |
| TRIP10     | 0.7676 | 1.0864 | 0.9308 | 0.8389 | 0.9059 | 0.0688 |
| ZNF384     | 0.8697 | 1.0538 | 0.8992 | 0.8011 | 0.9059 | 0.0534 |
| TMEM163    | 0.8659 | 1.1762 | 0.8164 | 0.7654 | 0.9060 | 0.0924 |
| CUL3       | 0.8808 | 0.9328 | 0.9450 | 0.8653 | 0.9060 | 0.0195 |
| SETD5      | 0.7889 | 1.1511 | 0.8435 | 0.8404 | 0.9060 | 0.0826 |
| FBXW9      | 0.7663 | 1.3323 | 0.8606 | 0.6647 | 0.9060 | 0.1476 |
| ZNF223     | 0.9229 | 0.9335 | 0.9763 | 0.7914 | 0.9060 | 0.0399 |
| LOC1001295 | 0.7632 | 1.0688 | 1.0253 | 0.7668 | 0.9060 | 0.0819 |

|            |        |        |        |        |        |        |
|------------|--------|--------|--------|--------|--------|--------|
| HSF2       | 0.8180 | 1.1386 | 0.8679 | 0.7996 | 0.9060 | 0.0789 |
| C9orf156   | 0.7430 | 1.2989 | 0.8434 | 0.7390 | 0.9061 | 0.1331 |
| ZBTB8A     | 0.8596 | 1.0032 | 0.9681 | 0.7935 | 0.9061 | 0.0484 |
| LOC728249  | 0.8174 | 1.1465 | 0.8467 | 0.8139 | 0.9061 | 0.0805 |
| PRDX3      | 0.7053 | 1.3069 | 0.9594 | 0.6529 | 0.9061 | 0.1494 |
| ZKSCAN3    | 0.8457 | 1.1343 | 0.8706 | 0.7739 | 0.9061 | 0.0788 |
| LST-3TM12  | 0.9069 | 0.9422 | 0.9400 | 0.8356 | 0.9062 | 0.0249 |
| FLJ32214   | 0.9236 | 0.7798 | 0.9953 | 0.9261 | 0.9062 | 0.0453 |
| LOC648481  | 0.8383 | 0.9882 | 0.9442 | 0.8541 | 0.9062 | 0.0359 |
| SEC24D     | 0.7917 | 1.1134 | 0.8816 | 0.8382 | 0.9062 | 0.0715 |
| GRK4       | 0.8705 | 1.0835 | 0.8614 | 0.8096 | 0.9062 | 0.0606 |
| LOC648509  | 0.8897 | 1.0282 | 0.9221 | 0.7850 | 0.9062 | 0.0501 |
| SEMA6C     | 0.9054 | 0.9420 | 0.9377 | 0.8399 | 0.9062 | 0.0236 |
| DIP2B      | 0.8386 | 1.1937 | 0.8557 | 0.7370 | 0.9063 | 0.0993 |
| TAAR2      | 0.9234 | 1.0519 | 0.8014 | 0.8483 | 0.9063 | 0.0547 |
| LOC1001344 | 0.8249 | 1.0376 | 0.9745 | 0.7884 | 0.9063 | 0.0595 |
| LOC642784  | 0.7798 | 1.1139 | 0.9808 | 0.7509 | 0.9063 | 0.0860 |
| EBF2       | 0.8465 | 0.9849 | 0.9659 | 0.8284 | 0.9064 | 0.0402 |
| WDFY2      | 0.8791 | 1.0600 | 0.9248 | 0.7619 | 0.9064 | 0.0616 |
| NRARP      | 0.8754 | 1.0099 | 0.9049 | 0.8356 | 0.9064 | 0.0373 |
| LOC642503  | 0.8209 | 1.0616 | 0.8304 | 0.9129 | 0.9064 | 0.0557 |
| C2orf73    | 0.9225 | 0.8845 | 0.9553 | 0.8637 | 0.9065 | 0.0203 |
| LOC1001305 | 0.7996 | 1.0258 | 0.9320 | 0.8686 | 0.9065 | 0.0481 |
| SLC25A27   | 0.8228 | 1.0013 | 0.9290 | 0.8729 | 0.9065 | 0.0383 |
| OPN1LW     | 0.8988 | 0.9970 | 0.9254 | 0.8049 | 0.9065 | 0.0397 |
| SRRM1      | 0.9606 | 1.1499 | 0.8543 | 0.6614 | 0.9065 | 0.1020 |
| FAM119A    | 0.7371 | 1.0900 | 1.0906 | 0.7085 | 0.9066 | 0.1063 |
| LOC643778  | 0.9405 | 1.0273 | 0.8568 | 0.8017 | 0.9066 | 0.0493 |
| NAT13      | 0.7661 | 1.0385 | 1.0947 | 0.7269 | 0.9066 | 0.0934 |
| PHF3       | 0.7644 | 1.2637 | 0.8302 | 0.7680 | 0.9066 | 0.1200 |
| RPP30      | 0.8508 | 0.9672 | 0.9623 | 0.8462 | 0.9066 | 0.0336 |
| USP41      | 0.8852 | 0.9633 | 0.9800 | 0.7978 | 0.9066 | 0.0417 |
| PODXL      | 0.8552 | 1.0762 | 0.9602 | 0.7348 | 0.9066 | 0.0729 |
| LOC728557  | 0.8296 | 1.0122 | 0.8497 | 0.9352 | 0.9067 | 0.0420 |
| UQCRH      | 0.7893 | 1.2251 | 0.8753 | 0.7369 | 0.9067 | 0.1099 |
| MTSS1      | 0.7594 | 1.0757 | 0.9811 | 0.8107 | 0.9067 | 0.0736 |
| UBE2R2     | 0.8248 | 1.0143 | 0.9087 | 0.8790 | 0.9067 | 0.0398 |
| SENP5      | 0.8079 | 1.1564 | 0.9524 | 0.7102 | 0.9067 | 0.0970 |
| NUDT14     | 0.7762 | 1.2046 | 0.9134 | 0.7327 | 0.9067 | 0.1065 |
| LOC648556  | 0.8246 | 1.0693 | 0.8823 | 0.8508 | 0.9067 | 0.0554 |
| LOC652741  | 0.9082 | 1.0322 | 0.9025 | 0.7842 | 0.9067 | 0.0506 |
| RCAN3      | 0.9526 | 0.8687 | 0.9833 | 0.8224 | 0.9068 | 0.0371 |
| LOC400214  | 0.8640 | 1.0743 | 0.9002 | 0.7886 | 0.9068 | 0.0605 |
| CLDND1     | 0.6374 | 1.2107 | 1.1525 | 0.6265 | 0.9068 | 0.1591 |
| IKBKB      | 0.8316 | 1.2118 | 0.8149 | 0.7688 | 0.9068 | 0.1025 |
| HIST3H2BB  | 0.7441 | 1.0679 | 0.9653 | 0.8499 | 0.9068 | 0.0702 |

|            |        |        |        |        |        |        |
|------------|--------|--------|--------|--------|--------|--------|
| ARHGAP5    | 0.8124 | 1.0921 | 1.0041 | 0.7186 | 0.9068 | 0.0857 |
| LOC654074  | 0.7874 | 0.9987 | 0.9483 | 0.8929 | 0.9068 | 0.0453 |
| ZNF672     | 0.7748 | 1.2157 | 0.9277 | 0.7092 | 0.9069 | 0.1127 |
| BGN        | 0.9098 | 0.9278 | 0.9512 | 0.8386 | 0.9069 | 0.0243 |
| LOC391509  | 0.7801 | 1.1963 | 0.9119 | 0.7392 | 0.9069 | 0.1033 |
| MOSPD3     | 0.8885 | 1.1196 | 0.8233 | 0.7963 | 0.9069 | 0.0735 |
| USP17      | 0.8330 | 0.9573 | 0.8619 | 0.9756 | 0.9069 | 0.0351 |
| BRSK2      | 0.8437 | 1.0096 | 0.9464 | 0.8281 | 0.9069 | 0.0431 |
| CDRT15     | 0.9426 | 0.9469 | 1.0029 | 0.7355 | 0.9070 | 0.0588 |
| TSEN34     | 0.8545 | 1.2528 | 0.8593 | 0.6613 | 0.9070 | 0.1242 |
| LOC654042  | 0.8374 | 0.9664 | 1.0084 | 0.8157 | 0.9070 | 0.0474 |
| SNORA43    | 0.8496 | 1.0765 | 0.8678 | 0.8340 | 0.9070 | 0.0569 |
| PI15       | 0.8363 | 1.1187 | 0.9196 | 0.7534 | 0.9070 | 0.0783 |
| LOC441533  | 0.8391 | 1.0086 | 0.8725 | 0.9078 | 0.9070 | 0.0367 |
| NOMO1      | 0.8036 | 1.1962 | 0.8503 | 0.7781 | 0.9070 | 0.0975 |
| LOC651638  | 0.7880 | 1.0612 | 0.8476 | 0.9314 | 0.9070 | 0.0592 |
| CECR2      | 0.8786 | 0.9354 | 0.9382 | 0.8760 | 0.9070 | 0.0172 |
| ZNF281     | 0.8621 | 1.0661 | 1.0017 | 0.6984 | 0.9071 | 0.0815 |
| HSN2       | 0.8156 | 1.0319 | 0.9204 | 0.8605 | 0.9071 | 0.0468 |
| AQP12B     | 0.7551 | 1.2575 | 0.9819 | 0.6340 | 0.9072 | 0.1373 |
| ZNF24      | 0.7768 | 1.2061 | 0.8809 | 0.7649 | 0.9072 | 0.1030 |
| PPP1R8     | 0.8382 | 1.0824 | 1.0017 | 0.7064 | 0.9072 | 0.0840 |
| OR51B4     | 0.6510 | 0.9981 | 1.0098 | 0.9700 | 0.9072 | 0.0858 |
| FLJ20297   | 0.9708 | 0.9301 | 0.9320 | 0.7960 | 0.9072 | 0.0382 |
| XRN2       | 0.7695 | 1.2001 | 0.9905 | 0.6688 | 0.9072 | 0.1185 |
| ZNF398     | 0.8235 | 1.0276 | 0.9081 | 0.8700 | 0.9073 | 0.0437 |
| C14orf145  | 0.8053 | 1.0462 | 0.9839 | 0.7939 | 0.9073 | 0.0635 |
| FLJ38973   | 0.8454 | 1.0139 | 0.9477 | 0.8223 | 0.9073 | 0.0448 |
| TREM2      | 0.8507 | 0.9375 | 0.9212 | 0.9199 | 0.9073 | 0.0193 |
| LOC1001304 | 0.8107 | 0.9959 | 0.9690 | 0.8539 | 0.9074 | 0.0446 |
| CEP76      | 0.8314 | 1.0206 | 0.9508 | 0.8267 | 0.9074 | 0.0474 |
| KIAA1688   | 0.7740 | 1.1541 | 0.9997 | 0.7020 | 0.9074 | 0.1038 |
| DNAJC18    | 0.9659 | 1.0278 | 0.9027 | 0.7333 | 0.9074 | 0.0634 |
| DAK        | 0.9023 | 1.0788 | 0.8929 | 0.7558 | 0.9075 | 0.0662 |
| FAM73A     | 0.7804 | 1.0354 | 0.9604 | 0.8537 | 0.9075 | 0.0564 |
| PCOLCE     | 0.9037 | 1.0885 | 0.8551 | 0.7827 | 0.9075 | 0.0653 |
| LOC645010  | 0.9660 | 0.9641 | 0.8670 | 0.8331 | 0.9075 | 0.0339 |
| HIST2H3A   | 0.7078 | 1.1704 | 0.8634 | 0.8887 | 0.9075 | 0.0963 |
| IDE        | 0.6908 | 1.2746 | 0.9660 | 0.6988 | 0.9076 | 0.1381 |
| LOC651524  | 0.9002 | 0.8182 | 0.9488 | 0.9630 | 0.9076 | 0.0327 |
| C8orf73    | 0.8684 | 1.0580 | 0.9035 | 0.8002 | 0.9076 | 0.0546 |
| DOCK7      | 0.8205 | 1.2428 | 0.8607 | 0.7063 | 0.9076 | 0.1164 |
| CETN2      | 0.7644 | 1.1239 | 1.0284 | 0.7137 | 0.9076 | 0.0998 |
| HIF1AN     | 0.8447 | 1.1520 | 0.8938 | 0.7399 | 0.9076 | 0.0875 |
| FLJ32065   | 0.8052 | 0.9819 | 0.9873 | 0.8559 | 0.9076 | 0.0457 |
| IMPG1      | 0.8508 | 0.9984 | 0.9567 | 0.8244 | 0.9076 | 0.0416 |



|            |        |        |        |        |        |        |
|------------|--------|--------|--------|--------|--------|--------|
| DUSP21     | 0.8846 | 1.0906 | 0.7891 | 0.8662 | 0.9076 | 0.0644 |
| LOC648189  | 0.7791 | 1.0361 | 0.9624 | 0.8529 | 0.9076 | 0.0570 |
| PAFAH1B2   | 0.8027 | 1.1211 | 0.8946 | 0.8121 | 0.9076 | 0.0741 |
| CSNK1G1    | 0.8009 | 1.1297 | 0.9647 | 0.7352 | 0.9077 | 0.0884 |
| LOC645600  | 0.8983 | 0.9555 | 0.9845 | 0.7926 | 0.9077 | 0.0423 |
| CNOT10     | 0.6618 | 1.2962 | 0.8637 | 0.8091 | 0.9077 | 0.1363 |
| C18orf10   | 0.7861 | 1.2929 | 0.9185 | 0.6335 | 0.9077 | 0.1410 |
| ATP6V1G2   | 0.7977 | 1.0533 | 0.9552 | 0.8248 | 0.9078 | 0.0595 |
| ZXDC       | 0.8842 | 1.0536 | 0.9364 | 0.7569 | 0.9078 | 0.0615 |
| LOC651272  | 0.8372 | 0.9015 | 1.0114 | 0.8811 | 0.9078 | 0.0370 |
| ZNF669     | 0.7607 | 1.0911 | 0.9750 | 0.8044 | 0.9078 | 0.0766 |
| LOC1001323 | 0.9798 | 0.9349 | 0.9877 | 0.7290 | 0.9078 | 0.0607 |
| C16orf61   | 0.7272 | 1.2322 | 1.0256 | 0.6464 | 0.9078 | 0.1354 |
| C7orf46    | 0.7984 | 1.0086 | 0.9757 | 0.8487 | 0.9079 | 0.0502 |
| LOC51152   | 0.8072 | 1.1355 | 0.9063 | 0.7824 | 0.9079 | 0.0805 |
| ATG2B      | 0.9043 | 1.0806 | 0.8640 | 0.7825 | 0.9079 | 0.0629 |
| LOC649125  | 0.9072 | 0.9899 | 0.8889 | 0.8456 | 0.9079 | 0.0302 |
| HNRNPU     | 0.6816 | 1.3081 | 0.8237 | 0.8185 | 0.9080 | 0.1374 |
| PRR5       | 0.8097 | 1.0998 | 0.9002 | 0.8220 | 0.9080 | 0.0670 |
| SPANXA2    | 0.8340 | 1.0214 | 0.9539 | 0.8227 | 0.9080 | 0.0480 |
| RNPEP      | 0.7875 | 1.2593 | 0.9290 | 0.6563 | 0.9080 | 0.1296 |
| LOC442517  | 0.8327 | 0.9246 | 1.0008 | 0.8740 | 0.9080 | 0.0362 |
| RPL10L     | 0.9149 | 1.0416 | 0.9906 | 0.6850 | 0.9080 | 0.0788 |
| SAMD8      | 0.8318 | 0.9944 | 0.9708 | 0.8352 | 0.9081 | 0.0433 |
| LOC1001305 | 0.8840 | 0.9274 | 0.9646 | 0.8563 | 0.9081 | 0.0239 |
| LOC645143  | 0.9671 | 0.8612 | 0.9346 | 0.8694 | 0.9081 | 0.0256 |
| PRKD1      | 0.7332 | 1.4236 | 0.8057 | 0.6698 | 0.9081 | 0.1741 |
| CNIH4      | 0.7277 | 1.1579 | 1.1515 | 0.5952 | 0.9081 | 0.1449 |
| LRRC37A2   | 0.8648 | 0.8411 | 1.0151 | 0.9113 | 0.9081 | 0.0385 |
| LOC654134  | 0.9414 | 1.0515 | 0.9136 | 0.7259 | 0.9081 | 0.0676 |
| FDPS       | 0.9730 | 0.9086 | 0.9409 | 0.8100 | 0.9081 | 0.0352 |
| FLJ12355   | 0.9040 | 1.0822 | 0.8532 | 0.7932 | 0.9082 | 0.0623 |
| UBE2F      | 0.7231 | 1.3001 | 0.9347 | 0.6748 | 0.9082 | 0.1423 |
| ABCG4      | 0.8772 | 1.0355 | 0.9634 | 0.7565 | 0.9082 | 0.0600 |
| C2orf16    | 0.8474 | 0.9327 | 0.8855 | 0.9672 | 0.9082 | 0.0263 |
| BTBD2      | 0.8283 | 1.2318 | 0.8739 | 0.6988 | 0.9082 | 0.1141 |
| SNORD65    | 0.9000 | 1.0723 | 0.8445 | 0.8162 | 0.9082 | 0.0574 |
| LHX5       | 0.8826 | 1.0215 | 0.8996 | 0.8293 | 0.9083 | 0.0406 |
| KCNK16     | 0.8911 | 0.9616 | 0.9762 | 0.8042 | 0.9083 | 0.0393 |
| PPWD1      | 0.8536 | 1.0522 | 0.9763 | 0.7510 | 0.9083 | 0.0665 |
| EPN1       | 0.8488 | 1.1367 | 0.8668 | 0.7810 | 0.9083 | 0.0783 |
| LOC1001341 | 0.8329 | 1.1553 | 0.9890 | 0.6561 | 0.9083 | 0.1068 |
| RANBP2     | 0.7550 | 0.9703 | 1.1418 | 0.7662 | 0.9083 | 0.0922 |
| LOC731528  | 0.8857 | 1.0004 | 0.8784 | 0.8688 | 0.9083 | 0.0309 |
| MTG1       | 0.7288 | 1.1165 | 1.0000 | 0.7879 | 0.9083 | 0.0906 |
| TLL4       | 0.8126 | 1.1680 | 0.8502 | 0.8025 | 0.9083 | 0.0872 |

|            |        |        |        |        |        |        |
|------------|--------|--------|--------|--------|--------|--------|
| MGC26733   | 0.8118 | 1.0924 | 0.8369 | 0.8922 | 0.9083 | 0.0636 |
| SIRT1      | 0.8992 | 1.0067 | 1.0227 | 0.7048 | 0.9084 | 0.0732 |
| LOC648176  | 0.8691 | 1.0085 | 0.9781 | 0.7779 | 0.9084 | 0.0528 |
| TEC        | 0.7855 | 1.0215 | 1.0071 | 0.8195 | 0.9084 | 0.0616 |
| TXNDC17    | 0.8327 | 1.0502 | 1.0877 | 0.6631 | 0.9084 | 0.0992 |
| NAIF1      | 0.8479 | 1.1863 | 0.8816 | 0.7180 | 0.9084 | 0.0991 |
| BTF3       | 0.8190 | 1.0724 | 1.0350 | 0.7075 | 0.9085 | 0.0872 |
| EXOSC1     | 0.8153 | 1.1595 | 0.9713 | 0.6878 | 0.9085 | 0.1018 |
| LDB2       | 0.8791 | 0.9657 | 0.8823 | 0.9067 | 0.9085 | 0.0201 |
| FAM72D     | 0.7864 | 1.0930 | 0.9463 | 0.8083 | 0.9085 | 0.0709 |
| LOC1001300 | 0.8316 | 0.9649 | 0.8748 | 0.9627 | 0.9085 | 0.0331 |
| LOC283487  | 0.6843 | 1.0428 | 0.9549 | 0.9520 | 0.9085 | 0.0776 |
| THAP8      | 0.9166 | 1.0056 | 0.9416 | 0.7704 | 0.9085 | 0.0497 |
| LOC649679  | 0.8737 | 0.9912 | 0.9849 | 0.7844 | 0.9085 | 0.0494 |
| NKX2-2     | 0.8596 | 0.9705 | 0.9351 | 0.8691 | 0.9086 | 0.0266 |
| UNKL       | 0.8052 | 1.0101 | 0.9684 | 0.8505 | 0.9086 | 0.0483 |
| LRRC50     | 0.8039 | 0.9453 | 0.9682 | 0.9169 | 0.9086 | 0.0364 |
| MKLN1      | 0.8435 | 1.2479 | 0.8263 | 0.7166 | 0.9086 | 0.1165 |
| ZBTB25     | 0.8570 | 1.1060 | 0.9188 | 0.7526 | 0.9086 | 0.0742 |
| GSTCD      | 0.7862 | 0.9985 | 0.9303 | 0.9195 | 0.9086 | 0.0444 |
| KIAA1797   | 0.9046 | 1.1060 | 0.9888 | 0.6351 | 0.9086 | 0.1001 |
| LOC284757  | 0.8172 | 0.9791 | 0.9585 | 0.8796 | 0.9086 | 0.0373 |
| CIP29      | 0.7071 | 1.2729 | 0.9581 | 0.6965 | 0.9086 | 0.1356 |
| RAP1GAP    | 0.9954 | 1.1210 | 0.8384 | 0.6799 | 0.9087 | 0.0957 |
| SLC30A4    | 0.8143 | 1.1395 | 0.9241 | 0.7567 | 0.9087 | 0.0844 |
| MOCS1      | 0.8090 | 1.1787 | 0.9298 | 0.7172 | 0.9087 | 0.1000 |
| GOT2       | 0.7012 | 1.4254 | 0.8314 | 0.6766 | 0.9087 | 0.1756 |
| LOC388436  | 0.9279 | 0.8684 | 0.9603 | 0.8780 | 0.9087 | 0.0216 |
| MYO1F      | 0.8846 | 0.9478 | 0.9522 | 0.8502 | 0.9087 | 0.0249 |
| NCRNA00095 | 0.8320 | 1.0609 | 0.9890 | 0.7528 | 0.9087 | 0.0706 |
| LOC652437  | 0.8648 | 0.9648 | 0.9890 | 0.8163 | 0.9087 | 0.0409 |
| SYNGR3     | 0.9154 | 1.0989 | 0.8184 | 0.8023 | 0.9087 | 0.0681 |
| LOC642156  | 0.7595 | 1.0594 | 0.8145 | 1.0015 | 0.9087 | 0.0721 |
| RBMXL2     | 0.8951 | 1.0175 | 0.8669 | 0.8555 | 0.9088 | 0.0372 |
| ZMYM5      | 0.8631 | 1.0793 | 0.9181 | 0.7745 | 0.9088 | 0.0641 |
| C12orf73   | 0.8296 | 1.1287 | 0.9052 | 0.7715 | 0.9088 | 0.0783 |
| OR9G9      | 0.8576 | 1.0221 | 0.8819 | 0.8734 | 0.9088 | 0.0381 |
| LOC1001283 | 0.8474 | 0.9662 | 0.9414 | 0.8802 | 0.9088 | 0.0273 |
| LOC652022  | 0.7400 | 1.1177 | 0.8320 | 0.9454 | 0.9088 | 0.0813 |
| LOC124216  | 0.7540 | 0.9811 | 1.0488 | 0.8512 | 0.9088 | 0.0659 |
| MAST4      | 0.7863 | 1.2283 | 0.9201 | 0.7005 | 0.9088 | 0.1157 |
| LOC390834  | 0.8299 | 1.0090 | 0.9837 | 0.8126 | 0.9088 | 0.0509 |
| FAM127C    | 0.7946 | 1.1237 | 0.9263 | 0.7906 | 0.9088 | 0.0783 |
| LOC645700  | 0.8166 | 1.1022 | 1.0253 | 0.6911 | 0.9088 | 0.0944 |
| ZNF707     | 0.7981 | 1.0135 | 0.9999 | 0.8240 | 0.9089 | 0.0568 |
| REPIN1     | 0.8029 | 1.3182 | 0.7858 | 0.7286 | 0.9089 | 0.1374 |

|            |        |        |        |        |        |        |
|------------|--------|--------|--------|--------|--------|--------|
| SNORD96B   | 0.8901 | 0.9193 | 1.0092 | 0.8169 | 0.9089 | 0.0398 |
| TPP2       | 0.8237 | 1.0770 | 0.9896 | 0.7452 | 0.9089 | 0.0757 |
| UTP15      | 0.7941 | 1.0596 | 1.0607 | 0.7211 | 0.9089 | 0.0886 |
| SLC38A10   | 0.8692 | 1.0794 | 0.9051 | 0.7819 | 0.9089 | 0.0625 |
| C15orf28   | 0.8145 | 1.0231 | 0.8780 | 0.9199 | 0.9089 | 0.0438 |
| LOC728178  | 0.8316 | 1.0987 | 0.8460 | 0.8593 | 0.9089 | 0.0635 |
| ZNF35      | 0.7348 | 1.0742 | 1.0548 | 0.7718 | 0.9089 | 0.0903 |
| LOC642681  | 0.8638 | 1.0408 | 0.9651 | 0.7661 | 0.9089 | 0.0598 |
| SMAP2      | 0.8174 | 1.2094 | 0.9422 | 0.6668 | 0.9089 | 0.1149 |
| LOC653630  | 0.8269 | 0.8928 | 0.9648 | 0.9513 | 0.9089 | 0.0315 |
| MED6       | 0.7032 | 1.2681 | 0.9370 | 0.7275 | 0.9090 | 0.1307 |
| ITGA5      | 0.8074 | 1.1679 | 0.8794 | 0.7812 | 0.9090 | 0.0888 |
| FBXL20     | 0.8036 | 1.1893 | 0.9199 | 0.7233 | 0.9090 | 0.1018 |
| LOC652369  | 0.8579 | 0.9710 | 0.8413 | 0.9659 | 0.9090 | 0.0345 |
| PPIF       | 0.7483 | 1.0147 | 1.0095 | 0.8638 | 0.9091 | 0.0640 |
| GLS2       | 0.8289 | 1.0475 | 0.9569 | 0.8030 | 0.9091 | 0.0571 |
| PRKG1      | 0.9084 | 0.9761 | 0.9682 | 0.7838 | 0.9091 | 0.0444 |
| MRPL54     | 0.7221 | 1.2371 | 0.9603 | 0.7170 | 0.9091 | 0.1232 |
| TBC1D17    | 1.0217 | 1.0847 | 0.7695 | 0.7606 | 0.9091 | 0.0842 |
| SOS2       | 0.8815 | 1.0664 | 0.8539 | 0.8347 | 0.9091 | 0.0533 |
| STK32C     | 0.7759 | 1.1185 | 0.9911 | 0.7511 | 0.9091 | 0.0882 |
| HCST       | 0.7700 | 1.1413 | 0.9091 | 0.8162 | 0.9092 | 0.0826 |
| TOMM34     | 0.7748 | 1.2943 | 0.8551 | 0.7125 | 0.9092 | 0.1317 |
| LOC285296  | 0.8689 | 1.0141 | 0.9661 | 0.7877 | 0.9092 | 0.0505 |
| SFRS12IP1  | 0.6811 | 1.1560 | 0.9527 | 0.8470 | 0.9092 | 0.0995 |
| LOC646801  | 0.9197 | 0.9680 | 0.9434 | 0.8059 | 0.9092 | 0.0358 |
| LOC283914  | 0.9036 | 0.9463 | 0.9581 | 0.8290 | 0.9093 | 0.0292 |
| FVT1       | 0.7877 | 1.2814 | 0.8530 | 0.7150 | 0.9093 | 0.1272 |
| LOC729222  | 0.8032 | 1.0647 | 0.9446 | 0.8247 | 0.9093 | 0.0604 |
| ERCC-00019 | 0.7327 | 0.9946 | 0.9758 | 0.9343 | 0.9093 | 0.0602 |
| LOC441957  | 0.8280 | 1.0130 | 0.9421 | 0.8543 | 0.9093 | 0.0423 |
| EID1       | 0.7893 | 1.2254 | 0.8634 | 0.7594 | 0.9094 | 0.1076 |
| RNPC3      | 0.8649 | 1.0257 | 0.9055 | 0.8414 | 0.9094 | 0.0410 |
| FSD1L      | 0.7152 | 1.1755 | 0.9543 | 0.7924 | 0.9094 | 0.1018 |
| C9orf173   | 0.9160 | 0.8216 | 1.0184 | 0.8816 | 0.9094 | 0.0412 |
| SOX15      | 0.8169 | 0.9392 | 0.9634 | 0.9182 | 0.9094 | 0.0322 |
| FNDC3B     | 0.6820 | 1.1727 | 1.0694 | 0.7136 | 0.9094 | 0.1242 |
| DEFB4      | 1.0694 | 0.9307 | 0.8332 | 0.8045 | 0.9094 | 0.0598 |
| LOC645466  | 0.7047 | 1.1474 | 0.9580 | 0.8278 | 0.9095 | 0.0947 |
| ZNF425     | 0.8656 | 1.0872 | 0.9889 | 0.6963 | 0.9095 | 0.0843 |
| GFRA2      | 0.8366 | 1.1031 | 0.8516 | 0.8468 | 0.9095 | 0.0646 |
| LOC652082  | 0.7971 | 1.0621 | 0.9699 | 0.8091 | 0.9095 | 0.0643 |
| LOC646550  | 0.9155 | 0.9588 | 0.9611 | 0.8028 | 0.9095 | 0.0371 |
| RAP2C      | 0.8234 | 1.0205 | 1.0550 | 0.7393 | 0.9095 | 0.0763 |
| LOC728324  | 0.8336 | 1.2437 | 0.8629 | 0.6980 | 0.9096 | 0.1170 |
| SLCO4C1    | 0.8893 | 0.9932 | 0.9179 | 0.8378 | 0.9096 | 0.0324 |

|            |        |        |        |        |        |        |
|------------|--------|--------|--------|--------|--------|--------|
| LOC389031  | 0.8731 | 0.8886 | 0.9865 | 0.8900 | 0.9096 | 0.0259 |
| M6PR       | 0.6077 | 1.3802 | 0.9383 | 0.7121 | 0.9096 | 0.1714 |
| SERINC3    | 0.8624 | 1.1279 | 0.9129 | 0.7353 | 0.9096 | 0.0818 |
| S100A14    | 0.8171 | 0.8299 | 0.9787 | 1.0127 | 0.9096 | 0.0503 |
| LOC728416  | 0.8435 | 1.0063 | 1.0197 | 0.7691 | 0.9096 | 0.0617 |
| SHC4       | 0.9313 | 0.9630 | 0.8583 | 0.8861 | 0.9097 | 0.0233 |
| WDR88      | 0.9458 | 0.9681 | 0.9093 | 0.8156 | 0.9097 | 0.0336 |
| LOC731432  | 0.7928 | 1.0215 | 0.9384 | 0.8861 | 0.9097 | 0.0479 |
| BTN1A1     | 0.9335 | 0.8861 | 0.9539 | 0.8653 | 0.9097 | 0.0205 |
| LOC644184  | 0.8888 | 0.9449 | 0.8405 | 0.9647 | 0.9097 | 0.0281 |
| N6AMT1     | 0.7732 | 1.1377 | 0.9612 | 0.7668 | 0.9097 | 0.0884 |
| INS        | 0.8145 | 0.9192 | 0.9888 | 0.9164 | 0.9097 | 0.0359 |
| NARS       | 0.8248 | 1.1216 | 1.1387 | 0.5541 | 0.9098 | 0.1387 |
| SPTA1      | 0.9201 | 1.0258 | 0.8464 | 0.8469 | 0.9098 | 0.0424 |
| ACOT11     | 0.8138 | 1.1706 | 0.8782 | 0.7766 | 0.9098 | 0.0894 |
| F2RL1      | 0.7237 | 1.1959 | 1.0312 | 0.6883 | 0.9098 | 0.1226 |
| LOC1001308 | 0.8962 | 0.9655 | 0.8981 | 0.8796 | 0.9098 | 0.0190 |
| FMNL1      | 0.8305 | 1.0025 | 1.1036 | 0.7028 | 0.9098 | 0.0891 |
| CCR7       | 0.9037 | 0.8929 | 0.9329 | 0.9099 | 0.9099 | 0.0084 |
| LOC645314  | 0.8449 | 1.0918 | 0.9428 | 0.7601 | 0.9099 | 0.0712 |
| RNASEH2C   | 0.9235 | 1.0057 | 0.9145 | 0.7958 | 0.9099 | 0.0432 |
| ABI2       | 0.8672 | 1.0391 | 0.9442 | 0.7892 | 0.9099 | 0.0534 |
| LRRC8B     | 0.8850 | 1.0681 | 0.8812 | 0.8054 | 0.9099 | 0.0558 |
| AZI1       | 0.8888 | 1.1139 | 0.8002 | 0.8369 | 0.9100 | 0.0704 |
| LOC729911  | 0.8649 | 0.9202 | 0.8998 | 0.9551 | 0.9100 | 0.0189 |
| LOC1001313 | 0.7059 | 1.1229 | 1.0343 | 0.7768 | 0.9100 | 0.1001 |
| RAMP1      | 0.7403 | 1.1619 | 0.9760 | 0.7618 | 0.9100 | 0.0994 |
| OR52M1     | 0.6285 | 0.9693 | 1.0948 | 0.9475 | 0.9100 | 0.0993 |
| LOC646764  | 0.8297 | 1.0643 | 0.9632 | 0.7829 | 0.9100 | 0.0640 |
| MIRH1      | 0.8215 | 0.9945 | 0.9026 | 0.9216 | 0.9100 | 0.0356 |
| MTRF1      | 0.8384 | 1.0905 | 0.8965 | 0.8149 | 0.9101 | 0.0625 |
| LOC650976  | 0.8245 | 1.0806 | 0.9838 | 0.7514 | 0.9101 | 0.0747 |
| GPR161     | 0.8926 | 1.0200 | 0.8492 | 0.8785 | 0.9101 | 0.0377 |
| LOC730255  | 0.5604 | 1.0320 | 1.3090 | 0.7390 | 0.9101 | 0.1647 |
| NDUFA4L2   | 0.8644 | 1.0929 | 0.7194 | 0.9640 | 0.9102 | 0.0789 |
| LOC643479  | 0.8405 | 0.9824 | 1.0046 | 0.8131 | 0.9102 | 0.0487 |
| LOC645413  | 0.9096 | 0.9213 | 1.0052 | 0.8045 | 0.9102 | 0.0412 |
| NUDT3      | 0.7195 | 1.2418 | 0.9383 | 0.7413 | 0.9102 | 0.1210 |
| LOC646714  | 1.0064 | 0.9964 | 0.8437 | 0.7946 | 0.9103 | 0.0536 |
| KCTD1      | 0.9114 | 0.9380 | 0.9739 | 0.8177 | 0.9103 | 0.0334 |
| OR4S1      | 0.7777 | 0.9024 | 0.9529 | 1.0080 | 0.9103 | 0.0492 |
| MYO1C      | 0.8135 | 1.0932 | 0.9589 | 0.7755 | 0.9103 | 0.0726 |
| OR5B12     | 0.8100 | 1.0154 | 0.9560 | 0.8599 | 0.9103 | 0.0463 |
| SNORD52    | 0.8321 | 1.0314 | 0.9234 | 0.8543 | 0.9103 | 0.0448 |
| LOC220930  | 0.8468 | 1.0340 | 0.9209 | 0.8396 | 0.9103 | 0.0451 |
| LAD1       | 0.7145 | 1.3205 | 0.9473 | 0.6592 | 0.9104 | 0.1503 |

|            |        |        |        |        |        |        |
|------------|--------|--------|--------|--------|--------|--------|
| LOC158318  | 0.7633 | 0.9858 | 0.9511 | 0.9414 | 0.9104 | 0.0499 |
| CSNK1G2    | 0.9319 | 1.0507 | 0.9658 | 0.6932 | 0.9104 | 0.0766 |
| B4GALT5    | 0.7721 | 1.1149 | 0.9446 | 0.8100 | 0.9104 | 0.0776 |
| TFF1       | 0.7680 | 1.0426 | 0.9033 | 0.9279 | 0.9104 | 0.0564 |
| LOC650098  | 0.8796 | 0.9709 | 0.9153 | 0.8759 | 0.9105 | 0.0220 |
| LOC653481  | 0.8639 | 1.0168 | 0.9137 | 0.8475 | 0.9105 | 0.0381 |
| QRICH1     | 0.8333 | 1.2172 | 0.8445 | 0.7471 | 0.9105 | 0.1045 |
| LOC1001297 | 0.8004 | 0.9885 | 1.0074 | 0.8458 | 0.9105 | 0.0515 |
| FBXO28     | 0.6570 | 1.3521 | 1.0046 | 0.6283 | 0.9105 | 0.1702 |
| SNHG8      | 0.8113 | 1.0718 | 0.9766 | 0.7824 | 0.9105 | 0.0687 |
| STK36      | 0.9766 | 1.1929 | 0.6790 | 0.7936 | 0.9105 | 0.1123 |
| CRLF3      | 0.8399 | 1.1112 | 0.9762 | 0.7149 | 0.9105 | 0.0856 |
| ERCC-00002 | 0.8099 | 1.0110 | 0.9045 | 0.9169 | 0.9105 | 0.0411 |
| FRS2       | 0.8441 | 1.0192 | 0.9445 | 0.8344 | 0.9106 | 0.0439 |
| AAK1       | 0.7280 | 1.1240 | 0.9481 | 0.8422 | 0.9106 | 0.0841 |
| CHMP6      | 0.8928 | 1.1401 | 0.9044 | 0.7050 | 0.9106 | 0.0891 |
| OTUD4      | 0.8000 | 1.0685 | 0.9158 | 0.8580 | 0.9106 | 0.0577 |
| LOC650717  | 0.8460 | 1.0577 | 0.9225 | 0.8163 | 0.9106 | 0.0539 |
| CCDC123    | 0.8696 | 1.2459 | 0.7990 | 0.7280 | 0.9106 | 0.1154 |
| ALG11      | 0.8401 | 1.0441 | 0.9687 | 0.7894 | 0.9106 | 0.0584 |
| MIR551B    | 0.8884 | 0.9677 | 0.8895 | 0.8968 | 0.9106 | 0.0191 |
| ZNF473     | 0.8020 | 1.1492 | 0.9406 | 0.7507 | 0.9106 | 0.0891 |
| LOC1001297 | 0.8095 | 1.0329 | 0.9879 | 0.8122 | 0.9106 | 0.0583 |
| XAGE1      | 0.8328 | 1.1586 | 0.9828 | 0.6683 | 0.9106 | 0.1047 |
| LOC642035  | 0.9074 | 0.9342 | 0.9722 | 0.8287 | 0.9106 | 0.0304 |
| PVR        | 0.8672 | 1.0468 | 0.9128 | 0.8158 | 0.9106 | 0.0495 |
| LOC644451  | 0.8912 | 1.1387 | 0.7680 | 0.8447 | 0.9106 | 0.0801 |
| PABPC1L2A  | 0.9115 | 0.9626 | 0.9261 | 0.8425 | 0.9107 | 0.0251 |
| LOC1001331 | 0.8209 | 1.1233 | 0.9234 | 0.7752 | 0.9107 | 0.0773 |
| LOC652065  | 0.8514 | 1.0327 | 0.9612 | 0.7976 | 0.9107 | 0.0530 |
| CTDSP2     | 0.5999 | 1.4473 | 0.9616 | 0.6342 | 0.9107 | 0.1965 |
| GBX1       | 0.8759 | 1.0238 | 0.8883 | 0.8549 | 0.9107 | 0.0383 |
| C14orf2    | 0.8846 | 1.1814 | 0.8424 | 0.7346 | 0.9107 | 0.0956 |
| LOC643868  | 0.7787 | 0.9991 | 1.0179 | 0.8473 | 0.9108 | 0.0583 |
| LOC1001330 | 0.6308 | 1.2060 | 1.0695 | 0.7368 | 0.9108 | 0.1357 |
| LOC645232  | 0.8127 | 0.9091 | 0.9916 | 0.9298 | 0.9108 | 0.0371 |
| ATP7B      | 0.8656 | 0.9798 | 0.9180 | 0.8799 | 0.9108 | 0.0255 |
| OPLAH      | 0.7881 | 1.2570 | 0.8987 | 0.6996 | 0.9108 | 0.1224 |
| DTNBP1     | 0.8710 | 1.0594 | 0.9535 | 0.7595 | 0.9108 | 0.0635 |
| NSUN6      | 0.8599 | 1.0326 | 1.0130 | 0.7379 | 0.9108 | 0.0694 |
| C1QL1      | 0.8535 | 1.0386 | 0.8700 | 0.8813 | 0.9109 | 0.0430 |
| LOC652472  | 0.7899 | 0.9835 | 1.0631 | 0.8070 | 0.9109 | 0.0670 |
| UBP1       | 0.8478 | 1.2925 | 0.7998 | 0.7033 | 0.9109 | 0.1307 |
| FLJ33590   | 0.7701 | 0.9855 | 0.9793 | 0.9088 | 0.9109 | 0.0501 |
| ASNSD1     | 0.6635 | 1.2987 | 0.9400 | 0.7414 | 0.9109 | 0.1418 |
| ZBBX       | 0.8231 | 1.1766 | 0.8602 | 0.7838 | 0.9109 | 0.0899 |

|            |        |        |        |        |        |        |
|------------|--------|--------|--------|--------|--------|--------|
| CAD        | 0.7960 | 1.2690 | 0.8522 | 0.7266 | 0.9110 | 0.1221 |
| KIAA0090   | 0.7287 | 1.1798 | 1.0061 | 0.7293 | 0.9110 | 0.1109 |
| LOC728940  | 0.9448 | 0.9826 | 0.8790 | 0.8377 | 0.9110 | 0.0325 |
| SLC46A2    | 0.8613 | 0.9532 | 0.9446 | 0.8850 | 0.9110 | 0.0225 |
| ZNF570     | 0.8873 | 0.9604 | 0.9565 | 0.8399 | 0.9110 | 0.0291 |
| LOC644065  | 0.8973 | 1.0252 | 0.9182 | 0.8034 | 0.9111 | 0.0455 |
| LOC402508  | 0.9100 | 0.9954 | 0.9475 | 0.7913 | 0.9111 | 0.0436 |
| ADI1       | 0.8787 | 1.0224 | 0.9771 | 0.7660 | 0.9111 | 0.0569 |
| ZNF345     | 0.8454 | 0.9907 | 0.9692 | 0.8392 | 0.9111 | 0.0400 |
| AKAP8      | 0.7809 | 1.0939 | 0.9358 | 0.8339 | 0.9111 | 0.0689 |
| LOC648625  | 0.8482 | 0.8323 | 0.9830 | 0.9810 | 0.9112 | 0.0411 |
| TNFRSF1B   | 0.8482 | 0.9855 | 0.9441 | 0.8669 | 0.9112 | 0.0323 |
| PIP5K2B    | 0.8290 | 1.1900 | 1.0123 | 0.6135 | 0.9112 | 0.1236 |
| DIP2A      | 0.8652 | 1.0836 | 0.8913 | 0.8046 | 0.9112 | 0.0603 |
| LOC400389  | 0.8779 | 0.9568 | 1.0058 | 0.8044 | 0.9112 | 0.0443 |
| VWA2       | 0.8539 | 0.9661 | 0.9831 | 0.8417 | 0.9112 | 0.0369 |
| GAL3ST2    | 0.9207 | 0.9998 | 0.9423 | 0.7821 | 0.9112 | 0.0462 |
| TIRAP      | 0.8652 | 1.0478 | 0.8918 | 0.8403 | 0.9112 | 0.0467 |
| BIN3       | 0.8402 | 0.9407 | 0.9216 | 0.9426 | 0.9112 | 0.0242 |
| RARS       | 0.7503 | 1.1795 | 0.9830 | 0.7322 | 0.9112 | 0.1061 |
| LOC1001304 | 0.9239 | 0.9959 | 0.9023 | 0.8229 | 0.9113 | 0.0356 |
| LOC644577  | 0.9333 | 0.9857 | 0.8563 | 0.8700 | 0.9113 | 0.0299 |
| SPCS2      | 0.6907 | 1.2903 | 1.0514 | 0.6127 | 0.9113 | 0.1584 |
| APPL1      | 0.8276 | 1.1988 | 0.7914 | 0.8274 | 0.9113 | 0.0962 |
| IL1R2      | 0.8053 | 1.0306 | 1.0036 | 0.8059 | 0.9113 | 0.0613 |
| C11orf54   | 0.7985 | 1.1807 | 1.0152 | 0.6510 | 0.9113 | 0.1168 |
| LOC652623  | 0.8714 | 0.8520 | 0.9790 | 0.9430 | 0.9113 | 0.0298 |
| FLJ42280   | 0.8027 | 0.9568 | 0.9620 | 0.9240 | 0.9114 | 0.0372 |
| HES5       | 0.7947 | 0.9974 | 0.9733 | 0.8800 | 0.9114 | 0.0464 |
| CLCN7      | 0.8628 | 1.2346 | 0.9407 | 0.6074 | 0.9114 | 0.1291 |
| LOC340357  | 0.7724 | 0.9827 | 0.9740 | 0.9167 | 0.9114 | 0.0486 |
| MDH2       | 0.8651 | 1.1124 | 0.9775 | 0.6907 | 0.9114 | 0.0893 |
| PLEKHF2    | 0.7568 | 1.0910 | 0.9916 | 0.8063 | 0.9114 | 0.0783 |
| FAM87B     | 0.8596 | 0.8950 | 1.0399 | 0.8513 | 0.9115 | 0.0439 |
| ERCC-00126 | 0.9166 | 0.9172 | 0.9722 | 0.8399 | 0.9115 | 0.0272 |
| TWF2       | 0.8725 | 1.2046 | 0.9160 | 0.6530 | 0.9115 | 0.1134 |
| NBPF12     | 0.8257 | 1.0217 | 0.9644 | 0.8342 | 0.9115 | 0.0485 |
| BRUNOL6    | 0.8580 | 0.9852 | 0.9027 | 0.9001 | 0.9115 | 0.0266 |
| LOC646501  | 0.8916 | 1.0607 | 0.8313 | 0.8625 | 0.9115 | 0.0512 |
| NUDCD1     | 0.8367 | 0.9376 | 0.9997 | 0.8721 | 0.9115 | 0.0361 |
| DLEU2      | 0.8106 | 1.0352 | 0.9911 | 0.8093 | 0.9116 | 0.0593 |
| FLJ31306   | 0.8196 | 0.9731 | 1.0759 | 0.7776 | 0.9116 | 0.0690 |
| LOC283788  | 0.9050 | 1.0572 | 0.8642 | 0.8200 | 0.9116 | 0.0516 |
| LOC642449  | 0.8618 | 1.0722 | 0.8825 | 0.8299 | 0.9116 | 0.0546 |
| LOC653175  | 0.8774 | 1.0584 | 0.8642 | 0.8464 | 0.9116 | 0.0493 |
| LOC649260  | 0.8670 | 0.9908 | 0.9563 | 0.8324 | 0.9116 | 0.0371 |

|            |        |        |        |        |        |        |
|------------|--------|--------|--------|--------|--------|--------|
| KLHL15     | 0.8869 | 0.9513 | 0.9241 | 0.8841 | 0.9116 | 0.0161 |
| GAPVD1     | 0.7345 | 1.1872 | 1.0404 | 0.6843 | 0.9116 | 0.1210 |
| SSR2       | 0.7910 | 1.2325 | 0.9659 | 0.6570 | 0.9116 | 0.1242 |
| SEC62      | 0.9351 | 1.0061 | 0.8777 | 0.8276 | 0.9116 | 0.0384 |
| LOC1001322 | 0.8715 | 1.0194 | 0.9458 | 0.8097 | 0.9116 | 0.0454 |
| LOC1001332 | 0.7888 | 0.9796 | 1.0410 | 0.8372 | 0.9117 | 0.0591 |
| DDX60L     | 0.8724 | 1.0345 | 0.9493 | 0.7904 | 0.9117 | 0.0523 |
| DDX19B     | 0.7399 | 1.2692 | 0.9212 | 0.7164 | 0.9117 | 0.1277 |
| LOC728588  | 0.7840 | 1.0466 | 0.9841 | 0.8320 | 0.9117 | 0.0620 |
| CMTM5      | 0.7555 | 1.0914 | 0.9292 | 0.8707 | 0.9117 | 0.0699 |
| TINAGL1    | 0.8602 | 0.9426 | 1.0382 | 0.8058 | 0.9117 | 0.0507 |
| PNMA6A     | 0.8783 | 1.0982 | 0.9147 | 0.7557 | 0.9117 | 0.0708 |
| LRRC1      | 0.7918 | 1.1784 | 0.9356 | 0.7411 | 0.9117 | 0.0980 |
| YTHDC2     | 0.8448 | 1.0118 | 0.8450 | 0.9454 | 0.9117 | 0.0409 |
| CHST1      | 0.9158 | 0.9861 | 1.0542 | 0.6908 | 0.9118 | 0.0789 |
| LOC1001327 | 0.7926 | 1.1356 | 0.8143 | 0.9047 | 0.9118 | 0.0784 |
| ATP13A3    | 0.7493 | 1.0449 | 0.9245 | 0.9285 | 0.9118 | 0.0609 |
| LOC441743  | 0.6066 | 1.0301 | 1.2317 | 0.7788 | 0.9118 | 0.1376 |
| REV3L      | 0.8584 | 1.1403 | 0.8340 | 0.8146 | 0.9118 | 0.0767 |
| P2RX6      | 0.7643 | 0.9951 | 1.0174 | 0.8706 | 0.9118 | 0.0588 |
| GTF2F2     | 0.6483 | 1.2970 | 0.9585 | 0.7435 | 0.9118 | 0.1439 |
| PTPN1      | 0.8031 | 1.1730 | 0.9479 | 0.7235 | 0.9119 | 0.0987 |
| LOC642486  | 0.7353 | 1.0869 | 0.8511 | 0.9742 | 0.9119 | 0.0760 |
| LOC1001308 | 0.7943 | 1.0624 | 0.9376 | 0.8532 | 0.9119 | 0.0582 |
| LOC1001302 | 0.8673 | 0.9729 | 0.8344 | 0.9731 | 0.9119 | 0.0359 |
| FAM131C    | 0.8367 | 0.9638 | 0.9708 | 0.8764 | 0.9120 | 0.0330 |
| LOC644754  | 0.8554 | 0.9845 | 0.8942 | 0.9139 | 0.9120 | 0.0270 |
| SMN2       | 0.9180 | 0.9105 | 1.0197 | 0.7997 | 0.9120 | 0.0450 |
| C14orf100  | 0.7930 | 1.0955 | 1.0987 | 0.6608 | 0.9120 | 0.1102 |
| TMEM125    | 0.7513 | 1.4123 | 0.7797 | 0.7047 | 0.9120 | 0.1675 |
| SFRS15     | 0.9396 | 1.1749 | 0.8019 | 0.7317 | 0.9120 | 0.0977 |
| SCARNA17   | 0.9429 | 0.9297 | 0.8975 | 0.8780 | 0.9120 | 0.0148 |
| TTLL5      | 0.8447 | 1.0928 | 0.9262 | 0.7844 | 0.9121 | 0.0669 |
| C14orf178  | 0.8572 | 0.9961 | 0.9579 | 0.8372 | 0.9121 | 0.0385 |
| MYH13      | 0.9418 | 0.9247 | 0.9580 | 0.8238 | 0.9121 | 0.0302 |
| TMEM161A   | 0.8002 | 1.0936 | 0.9124 | 0.8423 | 0.9121 | 0.0648 |
| LOC649873  | 0.8005 | 1.0650 | 0.9172 | 0.8657 | 0.9121 | 0.0563 |
| MIR1250    | 0.8877 | 0.9722 | 0.9825 | 0.8061 | 0.9121 | 0.0412 |
| SMO        | 0.9290 | 1.0768 | 0.9105 | 0.7322 | 0.9121 | 0.0706 |
| ARID1A     | 0.6772 | 1.3008 | 0.8976 | 0.7730 | 0.9121 | 0.1372 |
| GSTM2      | 0.9239 | 1.0081 | 0.9332 | 0.7835 | 0.9122 | 0.0469 |
| LOC651701  | 0.8608 | 1.0767 | 0.8237 | 0.8874 | 0.9122 | 0.0564 |
| GPS2       | 0.8295 | 0.9959 | 0.9412 | 0.8821 | 0.9122 | 0.0361 |
| TFG        | 0.7835 | 1.2182 | 0.9583 | 0.6888 | 0.9122 | 0.1163 |
| HCN1       | 0.8627 | 1.0423 | 0.9361 | 0.8078 | 0.9122 | 0.0507 |
| PITPNC1    | 0.8335 | 1.0097 | 0.9637 | 0.8419 | 0.9122 | 0.0441 |

|            |        |        |        |        |        |        |
|------------|--------|--------|--------|--------|--------|--------|
| UQCR       | 0.6779 | 1.3430 | 0.8618 | 0.7663 | 0.9122 | 0.1484 |
| PAGE3      | 0.8227 | 1.0854 | 0.8670 | 0.8740 | 0.9122 | 0.0588 |
| IL1F9      | 0.9497 | 0.9171 | 0.9718 | 0.8103 | 0.9123 | 0.0358 |
| ELK4       | 0.8269 | 1.0811 | 0.9507 | 0.7904 | 0.9123 | 0.0659 |
| HAS1       | 0.9597 | 0.9757 | 0.8707 | 0.8431 | 0.9123 | 0.0326 |
| GOLGA4     | 0.8988 | 1.0793 | 0.9104 | 0.7606 | 0.9123 | 0.0652 |
| LOC145853  | 0.8612 | 1.1171 | 0.9753 | 0.6956 | 0.9123 | 0.0892 |
| SOX12      | 0.8675 | 1.0639 | 0.8795 | 0.8383 | 0.9123 | 0.0513 |
| LOC649639  | 0.8816 | 1.0560 | 0.8991 | 0.8126 | 0.9123 | 0.0514 |
| LOC442519  | 0.8810 | 1.0855 | 0.9009 | 0.7820 | 0.9124 | 0.0633 |
| PIP4K2A    | 0.8617 | 1.1224 | 0.9884 | 0.6770 | 0.9124 | 0.0948 |
| TMEM155    | 0.8909 | 0.9573 | 1.0169 | 0.7845 | 0.9124 | 0.0498 |
| CCDC25     | 0.9626 | 1.1620 | 0.8755 | 0.6496 | 0.9124 | 0.1062 |
| VSX2       | 0.8717 | 0.9738 | 0.9663 | 0.8379 | 0.9124 | 0.0340 |
| HOMEZ      | 0.7987 | 1.0891 | 0.9045 | 0.8574 | 0.9124 | 0.0627 |
| SCFD1      | 0.7172 | 1.2586 | 1.0146 | 0.6593 | 0.9124 | 0.1392 |
| CSAD       | 0.8285 | 1.0004 | 1.0127 | 0.8083 | 0.9125 | 0.0545 |
| SPINK1     | 0.8713 | 0.9299 | 0.9653 | 0.8833 | 0.9125 | 0.0217 |
| LOC649280  | 0.9554 | 1.0355 | 0.8015 | 0.8576 | 0.9125 | 0.0519 |
| LOC728467  | 0.8561 | 1.0448 | 0.9706 | 0.7786 | 0.9125 | 0.0592 |
| LOC728024  | 0.7353 | 1.0240 | 1.0491 | 0.8418 | 0.9125 | 0.0750 |
| LOC1001339 | 0.8290 | 1.0403 | 0.9568 | 0.8240 | 0.9125 | 0.0525 |
| COL1A1     | 0.8726 | 1.1346 | 0.8246 | 0.8185 | 0.9126 | 0.0750 |
| LOC729983  | 0.7647 | 1.0142 | 0.9770 | 0.8943 | 0.9126 | 0.0553 |
| LOC647983  | 0.8193 | 0.9418 | 1.0455 | 0.8437 | 0.9126 | 0.0516 |
| MOGS       | 0.7444 | 1.0536 | 1.0233 | 0.8290 | 0.9126 | 0.0750 |
| STRN4      | 0.9281 | 1.0564 | 0.8945 | 0.7714 | 0.9126 | 0.0586 |
| C9orf43    | 0.7781 | 1.1575 | 0.8424 | 0.8727 | 0.9127 | 0.0839 |
| TBX10      | 0.8579 | 0.9980 | 0.9796 | 0.8153 | 0.9127 | 0.0449 |
| LOC651554  | 0.9258 | 0.9496 | 0.9533 | 0.8221 | 0.9127 | 0.0308 |
| LOC1001292 | 0.9405 | 0.9312 | 0.8266 | 0.9524 | 0.9127 | 0.0290 |
| LOC1001314 | 0.9153 | 0.9997 | 0.8639 | 0.8719 | 0.9127 | 0.0311 |
| AMOTL2     | 0.9100 | 1.0602 | 0.8254 | 0.8553 | 0.9127 | 0.0522 |
| C14orf85   | 0.6079 | 1.0267 | 1.2683 | 0.7480 | 0.9127 | 0.1471 |
| MIR15B     | 0.8943 | 1.0470 | 0.9627 | 0.7469 | 0.9127 | 0.0635 |
| POLE4      | 0.8609 | 1.2082 | 0.9213 | 0.6606 | 0.9128 | 0.1132 |
| C21orf69   | 0.8188 | 1.1260 | 0.9277 | 0.7785 | 0.9128 | 0.0778 |
| TMEM161B   | 0.7984 | 1.1096 | 0.9045 | 0.8386 | 0.9128 | 0.0692 |
| POLN       | 0.7413 | 1.1146 | 0.9672 | 0.8281 | 0.9128 | 0.0818 |
| SPAG7      | 0.8095 | 1.2387 | 0.8426 | 0.7604 | 0.9128 | 0.1099 |
| LOC647349  | 0.6323 | 1.3456 | 1.0566 | 0.6170 | 0.9129 | 0.1766 |
| TNFRSF12A  | 0.9068 | 1.1218 | 0.9085 | 0.7144 | 0.9129 | 0.0832 |
| PPAP2A     | 0.7747 | 1.3077 | 0.9279 | 0.6412 | 0.9129 | 0.1441 |
| LOC1001343 | 0.8565 | 1.0968 | 0.8805 | 0.8177 | 0.9129 | 0.0626 |
| PEX5L      | 0.8019 | 0.9769 | 1.0481 | 0.8247 | 0.9129 | 0.0595 |
| C2orf37    | 0.9149 | 0.9329 | 1.0297 | 0.7742 | 0.9129 | 0.0527 |



|            |        |        |        |        |        |        |
|------------|--------|--------|--------|--------|--------|--------|
| RNF133     | 0.8685 | 0.9677 | 0.9835 | 0.8320 | 0.9129 | 0.0371 |
| LOC1001293 | 0.7834 | 1.0219 | 0.9113 | 0.9351 | 0.9130 | 0.0493 |
| LOC642691  | 0.9935 | 0.8930 | 0.9935 | 0.7719 | 0.9130 | 0.0527 |
| CYFIP1     | 0.8712 | 1.2270 | 0.8647 | 0.6890 | 0.9130 | 0.1128 |
| PISD       | 0.8193 | 1.0970 | 0.9491 | 0.7865 | 0.9130 | 0.0707 |
| ZNF566     | 0.7862 | 1.0849 | 0.9387 | 0.8421 | 0.9130 | 0.0654 |
| LOC648829  | 0.8057 | 1.0170 | 0.9743 | 0.8549 | 0.9130 | 0.0496 |
| PRPF6      | 0.7070 | 1.2687 | 0.9854 | 0.6908 | 0.9130 | 0.1365 |
| SLFN12L    | 0.8671 | 0.9256 | 0.9495 | 0.9098 | 0.9130 | 0.0174 |
| RGS12      | 0.8583 | 1.0440 | 0.9048 | 0.8449 | 0.9130 | 0.0455 |
| COPS4      | 0.7581 | 1.0909 | 1.1444 | 0.6587 | 0.9130 | 0.1204 |
| ZNF408     | 0.7321 | 1.3397 | 0.8772 | 0.7032 | 0.9131 | 0.1472 |
| TTC30B     | 0.8684 | 1.0398 | 0.9558 | 0.7884 | 0.9131 | 0.0543 |
| ZFX        | 0.9512 | 1.1703 | 0.8480 | 0.6829 | 0.9131 | 0.1020 |
| METT10D    | 0.7588 | 1.1992 | 0.7835 | 0.9109 | 0.9131 | 0.1010 |
| A2LD1      | 0.9162 | 0.9326 | 0.9414 | 0.8624 | 0.9131 | 0.0177 |
| NAGK       | 0.9323 | 0.9635 | 0.9698 | 0.7871 | 0.9132 | 0.0428 |
| ALOX12     | 0.8553 | 0.9839 | 1.0166 | 0.7969 | 0.9132 | 0.0521 |
| C9orf110   | 0.9069 | 0.9474 | 0.9684 | 0.8302 | 0.9132 | 0.0305 |
| PDXK       | 0.7813 | 1.2990 | 0.8465 | 0.7261 | 0.9132 | 0.1309 |
| LOC390570  | 0.9749 | 0.9297 | 0.8628 | 0.8856 | 0.9132 | 0.0248 |
| LOC643373  | 0.8260 | 1.1479 | 0.8127 | 0.8665 | 0.9133 | 0.0790 |
| LMBR1L     | 0.7750 | 1.1434 | 0.9698 | 0.7649 | 0.9133 | 0.0901 |
| LOC648533  | 0.7584 | 1.0082 | 1.0800 | 0.8065 | 0.9133 | 0.0776 |
| SLC4A2     | 0.8888 | 1.1754 | 0.9060 | 0.6830 | 0.9133 | 0.1010 |
| TMED9      | 0.8103 | 1.3771 | 0.8798 | 0.5859 | 0.9133 | 0.1668 |
| LOC649071  | 0.8431 | 0.9570 | 0.9638 | 0.8893 | 0.9133 | 0.0288 |
| LOC729164  | 0.7667 | 1.0243 | 0.9732 | 0.8890 | 0.9133 | 0.0563 |
| SQLE       | 0.8366 | 1.1862 | 0.9744 | 0.6561 | 0.9133 | 0.1119 |
| LOC646358  | 0.8296 | 1.1466 | 0.8953 | 0.7818 | 0.9133 | 0.0812 |
| KLRA1      | 0.8639 | 1.0522 | 0.8896 | 0.8478 | 0.9134 | 0.0471 |
| LOC730740  | 0.8253 | 1.1798 | 1.0919 | 0.5565 | 0.9134 | 0.1408 |
| ZNF138     | 0.8382 | 1.0263 | 0.9325 | 0.8565 | 0.9134 | 0.0428 |
| C1orf61    | 0.7684 | 0.9868 | 1.0562 | 0.8423 | 0.9134 | 0.0657 |
| LOC653489  | 0.8001 | 1.0057 | 1.0219 | 0.8259 | 0.9134 | 0.0583 |
| BDKRB2     | 0.8217 | 1.1155 | 0.8708 | 0.8457 | 0.9134 | 0.0681 |
| LOC90120   | 0.6957 | 1.2714 | 0.7906 | 0.8962 | 0.9135 | 0.1262 |
| TLE3       | 0.8172 | 1.1401 | 0.9348 | 0.7617 | 0.9135 | 0.0837 |
| BCL2       | 0.8810 | 1.0117 | 0.9270 | 0.8341 | 0.9135 | 0.0378 |
| CCT5       | 0.9049 | 1.0460 | 0.9115 | 0.7917 | 0.9135 | 0.0520 |
| TBCC       | 0.7954 | 1.0724 | 0.9297 | 0.8566 | 0.9135 | 0.0597 |
| LOC1001281 | 0.8878 | 0.9759 | 0.9044 | 0.8860 | 0.9135 | 0.0212 |
| LOC1001313 | 0.7716 | 1.0468 | 0.8943 | 0.9414 | 0.9135 | 0.0570 |
| KIAA1632   | 0.8569 | 1.0046 | 0.9215 | 0.8711 | 0.9136 | 0.0334 |
| E2F6       | 0.8140 | 1.1047 | 0.9646 | 0.7709 | 0.9136 | 0.0761 |
| CRYGB      | 0.8925 | 0.9626 | 0.9401 | 0.8591 | 0.9136 | 0.0233 |

|             |        |        |        |        |        |        |
|-------------|--------|--------|--------|--------|--------|--------|
| DMRTB1      | 0.9253 | 0.9748 | 0.9499 | 0.8043 | 0.9136 | 0.0378 |
| FUT8        | 0.8495 | 1.0367 | 1.0008 | 0.7673 | 0.9136 | 0.0634 |
| PLOD2       | 0.9046 | 1.0698 | 0.8091 | 0.8709 | 0.9136 | 0.0557 |
| LOC1001323  | 0.7177 | 1.0395 | 0.9821 | 0.9151 | 0.9136 | 0.0701 |
| SEC23A      | 0.7196 | 1.2572 | 0.8640 | 0.8136 | 0.9136 | 0.1184 |
| LOC730393   | 0.9353 | 0.8491 | 1.0451 | 0.8250 | 0.9136 | 0.0498 |
| USPL1       | 0.8890 | 0.9597 | 0.9978 | 0.8080 | 0.9136 | 0.0418 |
| LOC282997   | 0.8032 | 1.0920 | 0.9838 | 0.7756 | 0.9136 | 0.0753 |
| ADORA1      | 0.8604 | 0.9950 | 0.9088 | 0.8905 | 0.9137 | 0.0289 |
| SNORD84     | 0.8065 | 1.1373 | 0.8647 | 0.8462 | 0.9137 | 0.0755 |
| ZNF302      | 0.9178 | 1.1584 | 0.9645 | 0.6140 | 0.9137 | 0.1127 |
| GFPT2       | 0.8633 | 1.0140 | 0.8828 | 0.8946 | 0.9137 | 0.0341 |
| NFYB        | 0.9270 | 0.9981 | 0.8696 | 0.8600 | 0.9137 | 0.0318 |
| LOC731338   | 0.8760 | 0.9480 | 0.9685 | 0.8623 | 0.9137 | 0.0262 |
| TAF2        | 0.7946 | 1.2658 | 0.8991 | 0.6953 | 0.9137 | 0.1245 |
| CLPB        | 0.8521 | 1.0043 | 1.0590 | 0.7395 | 0.9137 | 0.0727 |
| CHURC1      | 0.9041 | 1.1430 | 0.9216 | 0.6862 | 0.9137 | 0.0933 |
| GRB14       | 0.8550 | 1.0136 | 1.0152 | 0.7711 | 0.9137 | 0.0606 |
| LOC646762   | 0.8710 | 1.0159 | 0.9865 | 0.7816 | 0.9137 | 0.0540 |
| LOC730396   | 0.9055 | 0.9714 | 0.8567 | 0.9214 | 0.9138 | 0.0236 |
| C6orf211    | 0.8461 | 1.2184 | 0.9331 | 0.6575 | 0.9138 | 0.1167 |
| LOC727848   | 0.8885 | 1.0524 | 0.8641 | 0.8501 | 0.9138 | 0.0469 |
| IRX4        | 0.8780 | 1.2325 | 0.8225 | 0.7221 | 0.9138 | 0.1110 |
| CITED4      | 0.7821 | 1.1136 | 1.0241 | 0.7356 | 0.9138 | 0.0918 |
| MIR519A2    | 0.8578 | 1.0002 | 0.9268 | 0.8707 | 0.9138 | 0.0324 |
| GPR101      | 0.8417 | 1.0494 | 0.9632 | 0.8011 | 0.9139 | 0.0568 |
| IL6R        | 0.7643 | 1.0972 | 0.9518 | 0.8425 | 0.9139 | 0.0722 |
| MORF4L2     | 0.6908 | 1.3641 | 0.9207 | 0.6802 | 0.9139 | 0.1600 |
| HEATR5A     | 0.7349 | 1.2672 | 0.9030 | 0.7507 | 0.9139 | 0.1237 |
| FARSLB      | 0.8120 | 1.3612 | 0.8264 | 0.6563 | 0.9140 | 0.1540 |
| ALS2CR14    | 0.8281 | 0.9697 | 0.9801 | 0.8779 | 0.9140 | 0.0367 |
| C2orf60     | 0.8636 | 1.0050 | 0.8799 | 0.9074 | 0.9140 | 0.0317 |
| UBE2O       | 0.7775 | 1.1552 | 0.8893 | 0.8340 | 0.9140 | 0.0836 |
| CCDC91      | 0.8449 | 1.0248 | 1.0108 | 0.7755 | 0.9140 | 0.0616 |
| KIAA1671    | 0.7220 | 1.3401 | 0.9144 | 0.6795 | 0.9140 | 0.1509 |
| RUFY1       | 0.8050 | 1.2514 | 0.8544 | 0.7454 | 0.9140 | 0.1146 |
| KRTCAP2     | 0.7364 | 1.3398 | 0.8747 | 0.7053 | 0.9140 | 0.1466 |
| LOC646049   | 0.8240 | 1.0639 | 0.9343 | 0.8340 | 0.9141 | 0.0558 |
| WDR45       | 0.8322 | 1.0971 | 0.9514 | 0.7756 | 0.9141 | 0.0712 |
| OR7A5       | 0.8224 | 1.0266 | 0.9683 | 0.8391 | 0.9141 | 0.0497 |
| DKFZp686l15 | 0.8671 | 1.0152 | 0.8913 | 0.8828 | 0.9141 | 0.0341 |
| LOC730012   | 0.8092 | 1.0228 | 0.9195 | 0.9050 | 0.9141 | 0.0437 |
| LOC646301   | 0.8987 | 1.0520 | 0.8231 | 0.8827 | 0.9141 | 0.0487 |
| ART4        | 0.8931 | 0.9524 | 0.9429 | 0.8682 | 0.9141 | 0.0201 |
| CCDC75      | 0.9074 | 1.0562 | 0.9024 | 0.7907 | 0.9142 | 0.0545 |
| PPIB        | 0.7386 | 0.9663 | 1.0354 | 0.9165 | 0.9142 | 0.0634 |

|           |        |        |        |        |        |        |
|-----------|--------|--------|--------|--------|--------|--------|
| LOC644937 | 0.8433 | 0.9788 | 1.0692 | 0.7655 | 0.9142 | 0.0679 |
| LOC650561 | 0.7682 | 1.0394 | 1.0188 | 0.8306 | 0.9142 | 0.0676 |
| CDC73     | 0.8227 | 1.0576 | 1.0035 | 0.7731 | 0.9142 | 0.0688 |
| SNAPC5    | 0.7877 | 1.0812 | 0.9968 | 0.7911 | 0.9142 | 0.0741 |
| LOC649350 | 0.8890 | 1.0250 | 0.9147 | 0.8281 | 0.9142 | 0.0412 |
| CHRNE     | 0.8008 | 1.0325 | 0.9828 | 0.8409 | 0.9142 | 0.0555 |
| LRCH3     | 0.8336 | 1.1526 | 0.8786 | 0.7922 | 0.9143 | 0.0814 |
| C20orf85  | 0.8437 | 0.9604 | 0.9234 | 0.9294 | 0.9143 | 0.0249 |
| COG3      | 0.8478 | 1.1216 | 0.9095 | 0.7782 | 0.9143 | 0.0741 |
| LOC728115 | 0.9389 | 0.9555 | 0.9536 | 0.8093 | 0.9143 | 0.0352 |
| MLH3      | 0.8803 | 1.0721 | 0.8992 | 0.8056 | 0.9143 | 0.0563 |
| RPS26     | 0.9352 | 1.0164 | 1.0381 | 0.6675 | 0.9143 | 0.0852 |
| GIMAP4    | 0.9042 | 0.9581 | 1.0155 | 0.7795 | 0.9143 | 0.0503 |
| DEFB128   | 0.8669 | 1.0286 | 0.9385 | 0.8233 | 0.9143 | 0.0449 |
| ITGA2     | 0.8279 | 1.2397 | 0.8883 | 0.7014 | 0.9143 | 0.1152 |
| ANKMY1    | 0.8774 | 1.0809 | 0.8477 | 0.8513 | 0.9143 | 0.0559 |
| MANEAL    | 0.7972 | 1.0376 | 0.9470 | 0.8755 | 0.9143 | 0.0512 |
| LOC648771 | 0.7260 | 1.2316 | 1.0005 | 0.6993 | 0.9143 | 0.1258 |
| PARG      | 0.8475 | 1.0872 | 0.9065 | 0.8163 | 0.9144 | 0.0606 |
| NUDT5     | 0.6983 | 1.2114 | 1.0711 | 0.6768 | 0.9144 | 0.1341 |
| SS18      | 0.8901 | 1.0734 | 0.9687 | 0.7255 | 0.9144 | 0.0733 |
| ANO8      | 0.8883 | 1.0846 | 0.8583 | 0.8266 | 0.9144 | 0.0581 |
| LOC649404 | 0.8746 | 0.9269 | 0.9672 | 0.8892 | 0.9145 | 0.0207 |
| CCDC41    | 0.8440 | 1.0827 | 0.9257 | 0.8055 | 0.9145 | 0.0614 |
| SGMS2     | 0.8601 | 1.0004 | 0.9983 | 0.7993 | 0.9145 | 0.0505 |
| SPRR2G    | 0.8142 | 1.1417 | 0.8133 | 0.8889 | 0.9145 | 0.0778 |
| MGC42105  | 0.8756 | 0.9741 | 0.9861 | 0.8224 | 0.9146 | 0.0394 |
| PARP10    | 0.9054 | 1.0618 | 0.9131 | 0.7780 | 0.9146 | 0.0580 |
| C17orf56  | 0.7010 | 1.0994 | 0.9450 | 0.9129 | 0.9146 | 0.0820 |
| LOC644993 | 0.8836 | 0.9192 | 0.9930 | 0.8625 | 0.9146 | 0.0287 |
| TMEM105   | 0.8390 | 1.0723 | 0.9311 | 0.8160 | 0.9146 | 0.0581 |
| MGC42157  | 0.9278 | 0.9948 | 0.9076 | 0.8283 | 0.9146 | 0.0343 |
| LOC645835 | 0.7197 | 0.9012 | 1.0358 | 1.0017 | 0.9146 | 0.0710 |
| DNAJA1    | 0.8944 | 1.2225 | 0.9065 | 0.6352 | 0.9146 | 0.1202 |
| DGKH      | 0.7923 | 1.1518 | 0.9760 | 0.7385 | 0.9147 | 0.0940 |
| C16orf52  | 0.8387 | 1.1494 | 0.9698 | 0.7007 | 0.9147 | 0.0956 |
| KBTBD4    | 0.8834 | 1.1012 | 0.8940 | 0.7801 | 0.9147 | 0.0673 |
| ARL13B    | 0.8637 | 1.0767 | 0.9293 | 0.7891 | 0.9147 | 0.0611 |
| EIF3E     | 0.6719 | 1.3421 | 0.9650 | 0.6798 | 0.9147 | 0.1579 |
| FBXL16    | 0.8722 | 1.0434 | 0.9609 | 0.7823 | 0.9147 | 0.0563 |
| LOC645118 | 0.8376 | 1.0521 | 0.9549 | 0.8143 | 0.9147 | 0.0552 |
| FZD8      | 1.0082 | 0.9993 | 0.8781 | 0.7734 | 0.9148 | 0.0557 |
| ZNF699    | 0.8455 | 0.9731 | 0.9851 | 0.8554 | 0.9148 | 0.0373 |
| KRTAP4-1  | 0.7134 | 1.0235 | 0.9647 | 0.9577 | 0.9148 | 0.0687 |
| ZNF222    | 0.8674 | 1.0348 | 0.9174 | 0.8397 | 0.9148 | 0.0431 |
| LOC643017 | 0.9081 | 0.8621 | 0.9604 | 0.9288 | 0.9148 | 0.0206 |

|            |        |        |        |        |        |        |
|------------|--------|--------|--------|--------|--------|--------|
| LOC643986  | 0.9222 | 0.9612 | 0.9584 | 0.8175 | 0.9148 | 0.0336 |
| LOC646246  | 0.8678 | 0.9971 | 0.9887 | 0.8057 | 0.9148 | 0.0468 |
| FGD6       | 0.8424 | 1.0591 | 0.9238 | 0.8341 | 0.9148 | 0.0522 |
| LOC728979  | 0.8818 | 0.9818 | 0.9574 | 0.8384 | 0.9149 | 0.0332 |
| APLN       | 0.9596 | 1.0085 | 0.8812 | 0.8102 | 0.9149 | 0.0436 |
| LOC441487  | 0.8144 | 0.9603 | 1.0687 | 0.8161 | 0.9149 | 0.0616 |
| LOC643224  | 0.7819 | 1.0337 | 1.0527 | 0.7912 | 0.9149 | 0.0742 |
| ZNF684     | 0.7573 | 1.0501 | 1.0144 | 0.8378 | 0.9149 | 0.0701 |
| LOC730081  | 0.8955 | 1.0057 | 1.0192 | 0.7393 | 0.9149 | 0.0648 |
| LOC645342  | 0.9111 | 0.9748 | 0.8801 | 0.8937 | 0.9149 | 0.0210 |
| ZNF200     | 0.8037 | 1.1652 | 0.9409 | 0.7500 | 0.9149 | 0.0926 |
| ITSN2      | 0.8882 | 0.9931 | 0.9589 | 0.8197 | 0.9149 | 0.0385 |
| LOC646444  | 0.8658 | 1.0104 | 0.9352 | 0.8485 | 0.9150 | 0.0369 |
| C6orf122   | 0.8364 | 1.0270 | 0.9740 | 0.8225 | 0.9150 | 0.0506 |
| CCDC18     | 0.7484 | 1.2079 | 0.9001 | 0.8034 | 0.9150 | 0.1026 |
| PRR23A     | 0.8456 | 0.9503 | 0.9727 | 0.8913 | 0.9150 | 0.0288 |
| LOC727967  | 0.7981 | 1.0721 | 0.9889 | 0.8010 | 0.9150 | 0.0688 |
| PRKRIR     | 0.7159 | 1.2257 | 0.9800 | 0.7384 | 0.9150 | 0.1196 |
| LOC643713  | 0.8883 | 0.9306 | 0.9645 | 0.8767 | 0.9150 | 0.0201 |
| OAT        | 0.9108 | 1.1525 | 0.8691 | 0.7278 | 0.9151 | 0.0883 |
| SH2D2A     | 0.7546 | 1.1131 | 0.9379 | 0.8546 | 0.9151 | 0.0759 |
| LOC653420  | 0.8254 | 0.9921 | 0.9791 | 0.8636 | 0.9151 | 0.0416 |
| UGT1A3     | 0.8705 | 1.1428 | 0.8645 | 0.7825 | 0.9151 | 0.0785 |
| OR9I1      | 0.7850 | 0.9656 | 0.9603 | 0.9495 | 0.9151 | 0.0435 |
| AZIN1      | 0.8163 | 1.1924 | 0.9413 | 0.7104 | 0.9151 | 0.1038 |
| LOC387876  | 0.8949 | 0.9833 | 0.8639 | 0.9183 | 0.9151 | 0.0253 |
| SNORA65    | 0.7690 | 1.1864 | 0.9424 | 0.7626 | 0.9151 | 0.0996 |
| LOC644433  | 0.8502 | 0.9747 | 0.9059 | 0.9297 | 0.9151 | 0.0259 |
| PKN2       | 0.7697 | 1.0902 | 0.9302 | 0.8703 | 0.9151 | 0.0671 |
| RASSF5     | 0.8210 | 1.1587 | 0.9069 | 0.7740 | 0.9152 | 0.0857 |
| MSC        | 0.8690 | 0.9576 | 0.9825 | 0.8517 | 0.9152 | 0.0323 |
| ASCC3      | 0.8652 | 1.1128 | 1.0199 | 0.6628 | 0.9152 | 0.0984 |
| SMR3A      | 0.8828 | 0.9851 | 0.9307 | 0.8621 | 0.9152 | 0.0274 |
| SQRDL      | 0.6937 | 1.3004 | 0.9256 | 0.7411 | 0.9152 | 0.1378 |
| ZNF532     | 0.8379 | 1.1466 | 0.9093 | 0.7669 | 0.9152 | 0.0824 |
| C1orf162   | 0.9086 | 0.9968 | 0.8438 | 0.9118 | 0.9152 | 0.0314 |
| ZNF250     | 0.8344 | 1.0021 | 1.0480 | 0.7765 | 0.9152 | 0.0651 |
| ZNF483     | 0.7204 | 1.1494 | 0.9725 | 0.8187 | 0.9153 | 0.0937 |
| LOC652294  | 0.9271 | 1.0722 | 0.8791 | 0.7827 | 0.9153 | 0.0603 |
| TCHH       | 0.9870 | 0.8705 | 0.9322 | 0.8714 | 0.9153 | 0.0279 |
| LOC1001343 | 0.7878 | 1.1174 | 0.9452 | 0.8107 | 0.9153 | 0.0758 |
| DDIT3      | 0.9115 | 1.2525 | 0.7851 | 0.7121 | 0.9153 | 0.1197 |
| DUSP11     | 0.8218 | 1.2293 | 0.8306 | 0.7796 | 0.9153 | 0.1052 |
| LOC645937  | 1.0040 | 1.0265 | 0.9514 | 0.6795 | 0.9153 | 0.0802 |
| LOC731170  | 0.7970 | 1.0505 | 0.9528 | 0.8612 | 0.9154 | 0.0552 |
| TMEM207    | 0.8045 | 1.1449 | 0.9397 | 0.7725 | 0.9154 | 0.0847 |

|            |        |        |        |        |        |        |
|------------|--------|--------|--------|--------|--------|--------|
| CLNS1A     | 0.8045 | 1.3486 | 0.8681 | 0.6404 | 0.9154 | 0.1522 |
| ZNF580     | 0.8943 | 1.0789 | 0.8603 | 0.8281 | 0.9154 | 0.0561 |
| IRGM       | 0.8861 | 0.9491 | 0.9028 | 0.9237 | 0.9154 | 0.0136 |
| DALRD3     | 0.8189 | 1.1399 | 0.9631 | 0.7398 | 0.9154 | 0.0880 |
| IFFO1      | 0.8233 | 0.9760 | 0.9752 | 0.8872 | 0.9154 | 0.0371 |
| FAIM3      | 0.8490 | 1.0510 | 0.9175 | 0.8444 | 0.9155 | 0.0482 |
| LOC651617  | 0.8879 | 0.9713 | 0.9107 | 0.8920 | 0.9155 | 0.0192 |
| LOH12CR2   | 0.8610 | 1.1197 | 0.9584 | 0.7228 | 0.9155 | 0.0835 |
| HPSE       | 0.8130 | 1.0110 | 1.0178 | 0.8201 | 0.9155 | 0.0571 |
| OBP2B      | 0.9447 | 0.8244 | 0.9524 | 0.9405 | 0.9155 | 0.0305 |
| MARVELD1   | 0.9248 | 0.9116 | 0.9860 | 0.8397 | 0.9155 | 0.0300 |
| ARFIP2     | 0.9073 | 1.0646 | 0.8428 | 0.8475 | 0.9155 | 0.0518 |
| HOXA13     | 0.9395 | 0.9555 | 0.8801 | 0.8871 | 0.9156 | 0.0188 |
| LOC205251  | 0.7578 | 1.3181 | 0.8713 | 0.7152 | 0.9156 | 0.1381 |
| PSCD2      | 0.9397 | 1.1090 | 0.9031 | 0.7106 | 0.9156 | 0.0817 |
| TBC1D24    | 0.8472 | 1.0262 | 0.9492 | 0.8398 | 0.9156 | 0.0445 |
| MIF4GD     | 0.7828 | 1.2418 | 0.8889 | 0.7490 | 0.9156 | 0.1127 |
| LOC651126  | 0.9002 | 1.0911 | 0.7905 | 0.8807 | 0.9156 | 0.0632 |
| C17orf101  | 0.8616 | 1.1320 | 0.9047 | 0.7643 | 0.9157 | 0.0779 |
| NAT12      | 0.8596 | 1.1661 | 0.9735 | 0.6635 | 0.9157 | 0.1052 |
| ETV7       | 0.7397 | 1.0117 | 0.9455 | 0.9658 | 0.9157 | 0.0603 |
| IL1RAP     | 0.8423 | 0.9951 | 0.9634 | 0.8619 | 0.9157 | 0.0375 |
| SCGB1A1    | 0.8292 | 0.9888 | 0.9726 | 0.8722 | 0.9157 | 0.0387 |
| C20orf141  | 0.8974 | 0.9776 | 0.9702 | 0.8175 | 0.9157 | 0.0374 |
| UBE2MP1    | 0.9076 | 0.9192 | 0.9559 | 0.8801 | 0.9157 | 0.0157 |
| ZNF692     | 1.0020 | 1.0969 | 0.8140 | 0.7499 | 0.9157 | 0.0807 |
| CRTAM      | 0.9096 | 0.9235 | 0.9113 | 0.9186 | 0.9157 | 0.0032 |
| NTF3       | 0.7841 | 1.0184 | 0.9416 | 0.9189 | 0.9157 | 0.0488 |
| ETS1       | 0.7588 | 1.0810 | 1.1473 | 0.6760 | 0.9158 | 0.1166 |
| AOX2P      | 0.8265 | 1.0136 | 0.9550 | 0.8681 | 0.9158 | 0.0422 |
| C14orf65   | 0.8552 | 1.0080 | 0.9428 | 0.8571 | 0.9158 | 0.0369 |
| ASGR1      | 0.9194 | 0.9632 | 0.8689 | 0.9116 | 0.9158 | 0.0193 |
| LOC644783  | 0.8427 | 0.9573 | 1.0789 | 0.7844 | 0.9158 | 0.0652 |
| SENP8      | 0.9154 | 1.0300 | 0.9402 | 0.7778 | 0.9158 | 0.0522 |
| RILPL1     | 0.8425 | 1.1038 | 0.9654 | 0.7516 | 0.9158 | 0.0764 |
| HIGD2A     | 0.7307 | 1.2529 | 1.0696 | 0.6101 | 0.9158 | 0.1486 |
| UBA3       | 0.6596 | 1.3589 | 0.9217 | 0.7231 | 0.9158 | 0.1579 |
| LOC1001314 | 0.9716 | 1.0195 | 0.8494 | 0.8230 | 0.9159 | 0.0473 |
| PRSSL1     | 0.8503 | 0.9900 | 0.8950 | 0.9282 | 0.9159 | 0.0294 |
| FAM86D     | 0.8574 | 0.9387 | 1.0840 | 0.7835 | 0.9159 | 0.0644 |
| ZNF644     | 0.7499 | 1.2394 | 0.9338 | 0.7405 | 0.9159 | 0.1167 |
| LOC347119  | 0.8833 | 0.9518 | 0.9847 | 0.8440 | 0.9159 | 0.0320 |
| C7orf49    | 0.8140 | 1.0770 | 1.0475 | 0.7252 | 0.9159 | 0.0866 |
| AGBL5      | 0.8447 | 1.1692 | 0.9323 | 0.7176 | 0.9159 | 0.0952 |
| LOC388789  | 0.9612 | 0.9721 | 1.0672 | 0.6633 | 0.9160 | 0.0875 |
| LOC653135  | 0.8438 | 1.0654 | 0.9210 | 0.8336 | 0.9160 | 0.0535 |

|            |        |        |        |        |        |        |
|------------|--------|--------|--------|--------|--------|--------|
| FCF1       | 0.7393 | 1.0894 | 1.0020 | 0.8331 | 0.9160 | 0.0793 |
| CXorf40B   | 0.9120 | 1.0632 | 0.9810 | 0.7077 | 0.9160 | 0.0760 |
| LOC1001315 | 0.9441 | 1.0516 | 0.8878 | 0.7805 | 0.9160 | 0.0565 |
| ZFP3       | 0.8430 | 0.9734 | 0.9841 | 0.8635 | 0.9160 | 0.0365 |
| IDH2       | 0.9090 | 1.1859 | 0.8938 | 0.6755 | 0.9160 | 0.1046 |
| EHMT2      | 0.7926 | 1.0326 | 0.9760 | 0.8629 | 0.9160 | 0.0542 |
| SDK2       | 0.8668 | 1.0551 | 0.8742 | 0.8680 | 0.9160 | 0.0464 |
| IL23A      | 0.9130 | 1.1825 | 0.8442 | 0.7245 | 0.9160 | 0.0970 |
| LOC1001325 | 0.8283 | 1.0430 | 0.8985 | 0.8944 | 0.9160 | 0.0453 |
| DPP8       | 0.7997 | 1.2116 | 0.9006 | 0.7525 | 0.9161 | 0.1032 |
| FAT2       | 0.9664 | 0.9475 | 1.0043 | 0.7461 | 0.9161 | 0.0579 |
| LOC285501  | 0.9089 | 0.8464 | 0.9832 | 0.9259 | 0.9161 | 0.0281 |
| LOC650680  | 0.9427 | 0.9847 | 0.9836 | 0.7533 | 0.9161 | 0.0551 |
| MAPK1IP1L  | 0.8471 | 1.0955 | 0.9115 | 0.8103 | 0.9161 | 0.0634 |
| SPAST      | 0.8716 | 1.0106 | 1.0954 | 0.6869 | 0.9161 | 0.0893 |
| VPS26B     | 0.8415 | 1.0804 | 0.9740 | 0.7688 | 0.9162 | 0.0693 |
| EN2        | 0.8176 | 1.0135 | 0.9372 | 0.8963 | 0.9162 | 0.0408 |
| HMG1       | 0.7551 | 1.2351 | 0.9465 | 0.7280 | 0.9162 | 0.1169 |
| KIF5B      | 0.5280 | 1.4347 | 0.9992 | 0.7028 | 0.9162 | 0.1983 |
| LOC731488  | 0.9191 | 0.9290 | 0.9807 | 0.8360 | 0.9162 | 0.0299 |
| LOC641922  | 0.7283 | 1.1385 | 0.9064 | 0.8916 | 0.9162 | 0.0844 |
| DHH        | 0.9046 | 1.0869 | 0.9394 | 0.7340 | 0.9162 | 0.0725 |
| MAD2L1BP   | 0.7196 | 1.2780 | 0.9910 | 0.6764 | 0.9162 | 0.1392 |
| TMC8       | 0.8375 | 1.0150 | 0.8717 | 0.9408 | 0.9162 | 0.0393 |
| ZNF551     | 0.7743 | 0.9479 | 1.0712 | 0.8717 | 0.9163 | 0.0627 |
| MRC1L1     | 0.8632 | 0.8885 | 1.0567 | 0.8567 | 0.9163 | 0.0473 |
| MGA        | 0.8728 | 1.0157 | 0.9307 | 0.8461 | 0.9163 | 0.0375 |
| GPHA2      | 0.8680 | 1.1147 | 0.9285 | 0.7540 | 0.9163 | 0.0754 |
| LOC390760  | 0.7904 | 0.9535 | 1.0816 | 0.8398 | 0.9163 | 0.0648 |
| C22orf25   | 0.7980 | 1.1621 | 0.9608 | 0.7445 | 0.9163 | 0.0940 |
| LOC644684  | 0.7239 | 1.3101 | 0.8460 | 0.7854 | 0.9163 | 0.1336 |
| LOC649887  | 0.9070 | 0.9817 | 0.8930 | 0.8836 | 0.9163 | 0.0223 |
| LOC650475  | 0.8866 | 0.8897 | 0.9575 | 0.9316 | 0.9163 | 0.0171 |
| LOC653736  | 0.9649 | 0.9413 | 0.8758 | 0.8836 | 0.9164 | 0.0218 |
| ZNF441     | 0.8988 | 0.9522 | 0.9735 | 0.8409 | 0.9164 | 0.0297 |
| PHC3       | 0.8130 | 1.0779 | 0.9553 | 0.8195 | 0.9164 | 0.0630 |
| GPD1       | 0.9308 | 0.9081 | 0.9061 | 0.9207 | 0.9164 | 0.0058 |
| TNFSF10    | 0.9100 | 1.0312 | 0.9408 | 0.7837 | 0.9164 | 0.0512 |
| ZBTB3      | 0.7971 | 1.2282 | 0.8730 | 0.7677 | 0.9165 | 0.1062 |
| IBTK       | 0.8393 | 1.0744 | 1.0363 | 0.7160 | 0.9165 | 0.0844 |
| ATG5       | 0.8956 | 0.9532 | 0.9990 | 0.8182 | 0.9165 | 0.0390 |
| DCHS1      | 0.8841 | 0.9419 | 0.9918 | 0.8483 | 0.9165 | 0.0316 |
| C9orf117   | 0.8738 | 0.9675 | 0.9912 | 0.8336 | 0.9165 | 0.0375 |
| LOC647353  | 0.8486 | 1.0385 | 0.8840 | 0.8950 | 0.9165 | 0.0419 |
| TBPL1      | 0.6174 | 1.2416 | 1.1992 | 0.6078 | 0.9165 | 0.1757 |
| SNORA41    | 0.8870 | 1.0438 | 0.9303 | 0.8052 | 0.9166 | 0.0497 |

|            |        |        |        |        |        |        |
|------------|--------|--------|--------|--------|--------|--------|
| EMP3       | 0.8797 | 1.0566 | 0.9779 | 0.7521 | 0.9166 | 0.0657 |
| CC2D1A     | 0.9139 | 1.0889 | 0.8905 | 0.7730 | 0.9166 | 0.0652 |
| LOC646302  | 0.7284 | 1.1278 | 0.9285 | 0.8817 | 0.9166 | 0.0823 |
| LOC727756  | 0.9208 | 0.9256 | 1.0335 | 0.7865 | 0.9166 | 0.0506 |
| FAM103A1   | 0.8112 | 1.0667 | 1.0542 | 0.7344 | 0.9166 | 0.0845 |
| LOC650869  | 0.9337 | 1.0067 | 0.9244 | 0.8016 | 0.9166 | 0.0425 |
| PTPRN      | 0.8950 | 1.0001 | 0.8922 | 0.8793 | 0.9166 | 0.0280 |
| MFSD1      | 0.7521 | 1.3158 | 0.9592 | 0.6394 | 0.9166 | 0.1486 |
| LOC1001338 | 0.7289 | 1.0727 | 0.9946 | 0.8704 | 0.9167 | 0.0752 |
| LOC1001338 | 0.7668 | 0.9577 | 1.0540 | 0.8883 | 0.9167 | 0.0604 |
| IL22RA2    | 0.8462 | 0.9790 | 0.9416 | 0.8999 | 0.9167 | 0.0285 |
| MACF1      | 0.8670 | 1.1368 | 0.8217 | 0.8416 | 0.9167 | 0.0739 |
| ALKBH8     | 0.7474 | 1.1567 | 0.8688 | 0.8941 | 0.9167 | 0.0861 |
| ANAPC13    | 0.8165 | 1.1877 | 0.9502 | 0.7126 | 0.9168 | 0.1026 |
| TCF12      | 0.8627 | 1.1602 | 0.9070 | 0.7371 | 0.9168 | 0.0888 |
| NS3BP      | 0.8183 | 1.0065 | 0.9779 | 0.8644 | 0.9168 | 0.0449 |
| LOC728889  | 0.7991 | 1.0373 | 1.0358 | 0.7949 | 0.9168 | 0.0692 |
| DEM1       | 0.7668 | 1.1862 | 0.9051 | 0.8090 | 0.9168 | 0.0944 |
| LOC651609  | 0.9562 | 0.9709 | 0.9339 | 0.8062 | 0.9168 | 0.0376 |
| FUT4       | 0.9422 | 0.9990 | 0.9461 | 0.7799 | 0.9168 | 0.0474 |
| NOC4L      | 0.8237 | 1.1286 | 0.9329 | 0.7820 | 0.9168 | 0.0774 |
| ZNF236     | 0.8370 | 1.1123 | 0.8354 | 0.8827 | 0.9168 | 0.0661 |
| NBEAL2     | 0.9573 | 1.1264 | 0.7454 | 0.8382 | 0.9168 | 0.0822 |
| FAM164A    | 0.7515 | 1.2168 | 0.9309 | 0.7682 | 0.9169 | 0.1079 |
| MAPKAPK2   | 0.8659 | 1.1522 | 0.8973 | 0.7522 | 0.9169 | 0.0844 |
| SRP68      | 0.7873 | 1.4146 | 0.8192 | 0.6466 | 0.9169 | 0.1701 |
| LOC1001322 | 0.9030 | 1.0116 | 0.8302 | 0.9231 | 0.9170 | 0.0373 |
| LONRF1     | 0.8475 | 1.2691 | 0.8584 | 0.6928 | 0.9170 | 0.1233 |
| LOC390660  | 0.8409 | 1.0378 | 0.8957 | 0.8935 | 0.9170 | 0.0422 |
| NUDT7      | 0.9255 | 1.1375 | 0.8645 | 0.7406 | 0.9170 | 0.0829 |
| LOC1001342 | 0.8740 | 0.9972 | 0.9889 | 0.8080 | 0.9170 | 0.0460 |
| ACE2       | 0.8208 | 1.1165 | 0.9209 | 0.8100 | 0.9170 | 0.0710 |
| CXorf38    | 0.6940 | 1.1582 | 0.9966 | 0.8194 | 0.9170 | 0.1016 |
| LOC644677  | 0.7721 | 1.0817 | 0.9443 | 0.8702 | 0.9171 | 0.0652 |
| ZNF771     | 0.8461 | 1.0000 | 0.9745 | 0.8477 | 0.9171 | 0.0408 |
| SNORA77    | 0.8823 | 1.0902 | 0.9019 | 0.7941 | 0.9171 | 0.0623 |
| LOC1001293 | 0.8365 | 1.0725 | 0.8919 | 0.8675 | 0.9171 | 0.0530 |
| PKNOX1     | 0.7891 | 1.2580 | 0.8854 | 0.7361 | 0.9171 | 0.1177 |
| MYOD1      | 0.8905 | 1.0300 | 0.8741 | 0.8740 | 0.9171 | 0.0378 |
| WDR23      | 0.8548 | 1.1731 | 0.9187 | 0.7220 | 0.9172 | 0.0946 |
| RFPL4A     | 0.9150 | 1.0813 | 0.8427 | 0.8296 | 0.9172 | 0.0579 |
| HDLBP      | 0.7363 | 1.1848 | 0.8787 | 0.8688 | 0.9172 | 0.0949 |
| NBPF3      | 0.8563 | 1.0751 | 0.9251 | 0.8122 | 0.9172 | 0.0575 |
| RWDD4A     | 0.7835 | 1.1861 | 0.9535 | 0.7456 | 0.9172 | 0.1004 |
| SFTPD      | 0.9399 | 0.9626 | 0.9665 | 0.7997 | 0.9172 | 0.0396 |
| EHHADH     | 0.7709 | 1.0884 | 0.9010 | 0.9086 | 0.9172 | 0.0652 |

|            |        |        |        |        |        |        |
|------------|--------|--------|--------|--------|--------|--------|
| RGPD2      | 0.8635 | 0.9614 | 1.0355 | 0.8085 | 0.9172 | 0.0505 |
| SERPINB5   | 0.8692 | 1.1281 | 0.9320 | 0.7396 | 0.9172 | 0.0809 |
| HS6ST1     | 0.9653 | 1.0616 | 0.8825 | 0.7596 | 0.9172 | 0.0640 |
| TAF1D      | 0.8576 | 1.0041 | 1.0012 | 0.8060 | 0.9172 | 0.0504 |
| C11orf66   | 0.9013 | 0.9938 | 0.9847 | 0.7891 | 0.9172 | 0.0475 |
| LOC283392  | 0.8954 | 1.0225 | 0.9167 | 0.8343 | 0.9172 | 0.0392 |
| C16orf62   | 0.9321 | 1.0483 | 0.9228 | 0.7658 | 0.9172 | 0.0580 |
| LOC388796  | 0.6340 | 1.4420 | 0.8108 | 0.7823 | 0.9173 | 0.1791 |
| IFNAR2     | 0.7868 | 1.0819 | 0.9999 | 0.8004 | 0.9173 | 0.0734 |
| OR7E24     | 0.9852 | 0.9190 | 0.9172 | 0.8477 | 0.9173 | 0.0281 |
| ETV6       | 0.8993 | 1.0786 | 0.8571 | 0.8341 | 0.9173 | 0.0554 |
| ARL17P1    | 0.7854 | 1.0457 | 0.9273 | 0.9108 | 0.9173 | 0.0533 |
| TRUB2      | 0.8820 | 1.1901 | 0.8971 | 0.6999 | 0.9173 | 0.1014 |
| ZNF28      | 0.8134 | 1.0785 | 0.9528 | 0.8246 | 0.9173 | 0.0623 |
| LOC654200  | 0.7805 | 1.0755 | 0.9910 | 0.8222 | 0.9173 | 0.0696 |
| LOC1001322 | 0.8322 | 0.9450 | 1.0572 | 0.8348 | 0.9173 | 0.0535 |
| LRG1       | 0.8703 | 1.0086 | 0.8817 | 0.9086 | 0.9173 | 0.0315 |
| LOC643582  | 0.8957 | 0.9927 | 1.0124 | 0.7685 | 0.9173 | 0.0558 |
| ATP6V1A    | 0.8873 | 1.1134 | 0.9774 | 0.6913 | 0.9173 | 0.0885 |
| MYST3      | 0.8127 | 1.0972 | 1.0274 | 0.7321 | 0.9174 | 0.0865 |
| LOC653487  | 0.9859 | 0.8703 | 1.0694 | 0.7439 | 0.9174 | 0.0708 |
| LOC644884  | 0.8167 | 1.0414 | 1.0182 | 0.7932 | 0.9174 | 0.0652 |
| CLRN2      | 0.9181 | 0.9600 | 0.9388 | 0.8526 | 0.9174 | 0.0232 |
| C9orf129   | 0.8845 | 0.9648 | 0.9098 | 0.9105 | 0.9174 | 0.0169 |
| HSF1       | 0.7929 | 1.1024 | 0.8835 | 0.8907 | 0.9174 | 0.0656 |
| LOC440309  | 0.8772 | 0.9678 | 0.8964 | 0.9281 | 0.9174 | 0.0198 |
| ARHGDI3    | 0.8467 | 1.0452 | 0.9497 | 0.8279 | 0.9174 | 0.0503 |
| LOC391692  | 1.0112 | 0.8570 | 0.9217 | 0.8797 | 0.9174 | 0.0340 |
| C6orf26    | 0.9080 | 0.9548 | 0.8974 | 0.9095 | 0.9174 | 0.0127 |
| KLF7       | 0.9713 | 0.8657 | 0.9029 | 0.9300 | 0.9174 | 0.0223 |
| ITCH       | 0.7732 | 1.1436 | 0.9309 | 0.8221 | 0.9175 | 0.0823 |
| NFATC3     | 0.8982 | 1.0435 | 0.8867 | 0.8415 | 0.9175 | 0.0438 |
| LOC1001285 | 0.9893 | 0.8261 | 0.9385 | 0.9159 | 0.9175 | 0.0341 |
| HOXD11     | 0.8929 | 1.0483 | 0.8625 | 0.8662 | 0.9175 | 0.0441 |
| LOC1001329 | 1.0212 | 0.8838 | 0.9845 | 0.7803 | 0.9175 | 0.0542 |
| EIF5       | 0.7506 | 1.2518 | 0.9100 | 0.7576 | 0.9175 | 0.1173 |
| LOC1001343 | 0.9531 | 0.9717 | 0.9295 | 0.8157 | 0.9175 | 0.0350 |
| FAM122C    | 0.7863 | 0.9866 | 0.8452 | 1.0520 | 0.9175 | 0.0615 |
| LOC644224  | 0.8001 | 0.9919 | 0.9518 | 0.9263 | 0.9175 | 0.0414 |
| POFUT2     | 0.8968 | 1.1676 | 0.8295 | 0.7762 | 0.9175 | 0.0869 |
| LOC1001303 | 0.8289 | 1.0157 | 1.0006 | 0.8249 | 0.9175 | 0.0524 |
| LOC643237  | 0.8013 | 0.9821 | 1.0349 | 0.8519 | 0.9175 | 0.0546 |
| LOC1001316 | 0.8547 | 0.9703 | 0.8871 | 0.9582 | 0.9176 | 0.0279 |
| PEX13      | 0.9126 | 1.0013 | 1.0873 | 0.6690 | 0.9176 | 0.0902 |
| LOC1001299 | 0.9712 | 0.8795 | 0.9852 | 0.8343 | 0.9176 | 0.0363 |
| LOC652286  | 0.8696 | 0.9779 | 0.9837 | 0.8392 | 0.9176 | 0.0370 |



|            |        |        |        |        |        |        |
|------------|--------|--------|--------|--------|--------|--------|
| ELOVL2     | 0.7430 | 1.1191 | 0.9073 | 0.9010 | 0.9176 | 0.0772 |
| MMP21      | 0.9233 | 1.0268 | 0.8839 | 0.8364 | 0.9176 | 0.0405 |
| WDR55      | 0.7388 | 1.2530 | 0.8855 | 0.7932 | 0.9176 | 0.1158 |
| VPS8       | 0.8802 | 1.1313 | 0.8474 | 0.8116 | 0.9176 | 0.0726 |
| DDX11      | 0.8734 | 1.0396 | 0.9337 | 0.8238 | 0.9176 | 0.0465 |
| DDX43      | 1.0206 | 1.0927 | 0.8141 | 0.7432 | 0.9176 | 0.0829 |
| CYP1B1     | 0.8880 | 0.8729 | 1.0314 | 0.8784 | 0.9177 | 0.0380 |
| ZNF283     | 0.6976 | 1.1543 | 1.0236 | 0.7953 | 0.9177 | 0.1043 |
| SLC6A5     | 0.9822 | 0.9018 | 0.8823 | 0.9045 | 0.9177 | 0.0221 |
| LOC652476  | 0.9961 | 0.7917 | 1.0080 | 0.8750 | 0.9177 | 0.0516 |
| RNF128     | 0.8382 | 1.1027 | 0.8484 | 0.8816 | 0.9177 | 0.0623 |
| MCFD2      | 0.9732 | 1.0846 | 0.8906 | 0.7227 | 0.9178 | 0.0762 |
| SLU7       | 0.8463 | 1.0885 | 1.0216 | 0.7147 | 0.9178 | 0.0848 |
| LOC1001291 | 0.8666 | 1.0504 | 1.0220 | 0.7322 | 0.9178 | 0.0739 |
| FLJ44124   | 0.7800 | 1.1482 | 1.0010 | 0.7421 | 0.9178 | 0.0957 |
| PEBP1      | 0.8926 | 0.9855 | 1.0846 | 0.7086 | 0.9178 | 0.0800 |
| PSMB2      | 0.6790 | 1.5529 | 0.8243 | 0.6152 | 0.9178 | 0.2162 |
| LOC643324  | 0.8259 | 1.0693 | 0.9201 | 0.8561 | 0.9178 | 0.0542 |
| LOC1001346 | 0.8952 | 1.0013 | 0.9305 | 0.8445 | 0.9178 | 0.0329 |
| LOC646307  | 0.8916 | 0.9390 | 0.9804 | 0.8606 | 0.9179 | 0.0263 |
| FMOD       | 0.8897 | 0.9506 | 0.9630 | 0.8683 | 0.9179 | 0.0230 |
| ARMCX5     | 0.8347 | 1.0262 | 1.1354 | 0.6755 | 0.9179 | 0.1019 |
| LOC645743  | 0.8166 | 1.1411 | 0.9141 | 0.7998 | 0.9179 | 0.0785 |
| SERF1A     | 0.8891 | 1.1288 | 0.9264 | 0.7274 | 0.9179 | 0.0825 |
| ZNF263     | 0.8669 | 1.2094 | 0.8924 | 0.7031 | 0.9180 | 0.1058 |
| LOC728850  | 0.8806 | 1.0182 | 0.9725 | 0.8006 | 0.9180 | 0.0485 |
| MSH2       | 0.7718 | 1.0092 | 0.9529 | 0.9382 | 0.9180 | 0.0511 |
| RPH3AL     | 0.8235 | 1.0502 | 0.9821 | 0.8163 | 0.9180 | 0.0584 |
| LOC1001328 | 0.9282 | 1.0333 | 0.8510 | 0.8599 | 0.9181 | 0.0421 |
| LOC402382  | 0.8207 | 1.0038 | 0.9715 | 0.8765 | 0.9181 | 0.0423 |
| LOC1001325 | 0.9132 | 1.0276 | 0.9488 | 0.7830 | 0.9181 | 0.0510 |
| MAN1C1     | 0.9371 | 0.9875 | 0.9688 | 0.7792 | 0.9182 | 0.0475 |
| DDR2       | 0.9170 | 0.9770 | 0.9281 | 0.8505 | 0.9182 | 0.0261 |
| LOC729451  | 0.9182 | 0.9295 | 0.9139 | 0.9111 | 0.9182 | 0.0040 |
| LOC1001285 | 0.8475 | 1.0638 | 0.9909 | 0.7705 | 0.9182 | 0.0666 |
| LOC652185  | 0.9857 | 0.9810 | 0.9505 | 0.7555 | 0.9182 | 0.0548 |
| RADIL      | 0.9844 | 1.0411 | 0.7875 | 0.8597 | 0.9182 | 0.0577 |
| LOC649984  | 0.8573 | 1.0365 | 0.9366 | 0.8426 | 0.9182 | 0.0445 |
| FNIP1      | 0.8044 | 1.1800 | 0.9315 | 0.7570 | 0.9182 | 0.0947 |
| GYG1       | 0.6508 | 1.4057 | 1.0313 | 0.5851 | 0.9182 | 0.1899 |
| BAD        | 0.8686 | 1.1676 | 0.9203 | 0.7164 | 0.9182 | 0.0937 |
| LOC441454  | 0.7492 | 1.0177 | 1.0254 | 0.8808 | 0.9183 | 0.0654 |
| ZNHIT6     | 0.7969 | 1.1543 | 1.0048 | 0.7170 | 0.9183 | 0.0993 |
| LOC731159  | 0.9420 | 0.8248 | 0.9718 | 0.9345 | 0.9183 | 0.0322 |
| DDB2       | 0.9181 | 0.9566 | 0.9716 | 0.8267 | 0.9183 | 0.0325 |
| LOC440348  | 0.9008 | 1.0313 | 0.9264 | 0.8146 | 0.9183 | 0.0446 |

|            |        |        |        |        |        |        |
|------------|--------|--------|--------|--------|--------|--------|
| NPC1L1     | 0.8774 | 0.9436 | 0.9928 | 0.8594 | 0.9183 | 0.0307 |
| LOC1001342 | 0.9008 | 0.9763 | 0.9615 | 0.8346 | 0.9183 | 0.0323 |
| EGLN2      | 0.8856 | 1.1955 | 0.8576 | 0.7346 | 0.9183 | 0.0980 |
| DNAL1      | 0.7898 | 1.1312 | 0.9700 | 0.7824 | 0.9184 | 0.0832 |
| UBASH3B    | 0.8393 | 1.0242 | 0.9701 | 0.8400 | 0.9184 | 0.0468 |
| AATK       | 0.7993 | 1.0913 | 0.9739 | 0.8092 | 0.9184 | 0.0702 |
| LOC1001330 | 0.7581 | 1.0116 | 0.9556 | 0.9484 | 0.9184 | 0.0553 |
| ARNT       | 0.8965 | 1.0424 | 0.9064 | 0.8284 | 0.9184 | 0.0448 |
| LOC645246  | 0.9143 | 0.9453 | 0.9652 | 0.8489 | 0.9185 | 0.0254 |
| DAO        | 0.7828 | 1.0949 | 0.9158 | 0.8804 | 0.9185 | 0.0652 |
| USP26      | 0.9178 | 1.0027 | 0.9324 | 0.8210 | 0.9185 | 0.0374 |
| LOC1001312 | 0.7687 | 0.9042 | 1.0107 | 0.9904 | 0.9185 | 0.0550 |
| ADAM17     | 0.8374 | 1.1262 | 0.8243 | 0.8861 | 0.9185 | 0.0705 |
| WDR6       | 0.8570 | 1.2447 | 0.9384 | 0.6340 | 0.9185 | 0.1264 |
| LOC1001294 | 0.8071 | 1.0692 | 0.9379 | 0.8599 | 0.9185 | 0.0570 |
| LOC1001328 | 0.8112 | 1.0351 | 0.9493 | 0.8786 | 0.9185 | 0.0480 |
| INSM1      | 0.8592 | 1.0494 | 0.9666 | 0.7990 | 0.9185 | 0.0557 |
| LOC401074  | 0.8362 | 1.2427 | 0.9147 | 0.6807 | 0.9185 | 0.1185 |
| C21orf91   | 0.7008 | 1.0713 | 1.0204 | 0.8817 | 0.9185 | 0.0829 |
| LOC647176  | 0.8147 | 1.0423 | 0.9509 | 0.8662 | 0.9186 | 0.0499 |
| SUPT3H     | 0.8321 | 1.0937 | 0.9462 | 0.8023 | 0.9186 | 0.0661 |
| IL18R1     | 0.8799 | 1.0164 | 0.9857 | 0.7923 | 0.9186 | 0.0512 |
| TMEM106A   | 0.8221 | 1.0562 | 0.9113 | 0.8847 | 0.9186 | 0.0495 |
| LOC642243  | 0.8000 | 1.0541 | 1.0394 | 0.7808 | 0.9186 | 0.0742 |
| MGC70863   | 0.8472 | 1.0707 | 0.8871 | 0.8693 | 0.9186 | 0.0514 |
| YLPM1      | 0.9299 | 0.9377 | 1.0455 | 0.7613 | 0.9186 | 0.0587 |
| CCDC43     | 0.8012 | 1.0742 | 1.0184 | 0.7806 | 0.9186 | 0.0747 |
| LOC646567  | 0.6214 | 1.4452 | 0.9028 | 0.7052 | 0.9187 | 0.1851 |
| RTDR1      | 0.8314 | 0.9963 | 0.9632 | 0.8838 | 0.9187 | 0.0375 |
| MIR580     | 0.8035 | 1.0890 | 0.9855 | 0.7967 | 0.9187 | 0.0717 |
| LOC653664  | 0.9618 | 0.9362 | 1.0281 | 0.7487 | 0.9187 | 0.0599 |
| PUS7L      | 0.7970 | 1.0552 | 0.9799 | 0.8428 | 0.9187 | 0.0598 |
| FAM164C    | 0.8141 | 1.1448 | 0.9590 | 0.7570 | 0.9187 | 0.0865 |
| LOC729952  | 0.8383 | 0.9547 | 0.9984 | 0.8836 | 0.9187 | 0.0358 |
| ANKHD1     | 0.8853 | 1.1872 | 0.8895 | 0.7131 | 0.9188 | 0.0985 |
| LOC647166  | 0.8526 | 0.9891 | 0.9528 | 0.8806 | 0.9188 | 0.0315 |
| SNORD125   | 0.7198 | 1.0657 | 1.0251 | 0.8647 | 0.9188 | 0.0793 |
| C1GALT1    | 0.7959 | 0.9076 | 1.0875 | 0.8845 | 0.9189 | 0.0611 |
| ZMYND10    | 0.9159 | 1.0218 | 0.8722 | 0.8657 | 0.9189 | 0.0361 |
| C14orf21   | 0.8600 | 0.9869 | 0.9709 | 0.8579 | 0.9189 | 0.0348 |
| LOC647979  | 0.9253 | 0.9783 | 0.9815 | 0.7906 | 0.9189 | 0.0447 |
| LOC1001336 | 0.8017 | 0.9678 | 0.9737 | 0.9326 | 0.9190 | 0.0401 |
| NFKBIE     | 0.8879 | 1.0890 | 0.8143 | 0.8845 | 0.9190 | 0.0592 |
| LOC400707  | 0.8305 | 1.0691 | 1.0144 | 0.7619 | 0.9190 | 0.0731 |
| MIR631     | 0.9546 | 0.9572 | 0.8724 | 0.8917 | 0.9190 | 0.0217 |
| RCADH5     | 0.8618 | 1.0270 | 0.9588 | 0.8284 | 0.9190 | 0.0454 |

|            |        |        |        |        |        |        |
|------------|--------|--------|--------|--------|--------|--------|
| LOC728475  | 0.8572 | 1.1609 | 0.8474 | 0.8106 | 0.9190 | 0.0812 |
| HIST1H4L   | 0.8209 | 1.0969 | 0.8887 | 0.8698 | 0.9190 | 0.0610 |
| ZNF75A     | 0.9568 | 0.9362 | 0.9888 | 0.7944 | 0.9190 | 0.0429 |
| LDLRAD3    | 0.8887 | 0.9643 | 0.9411 | 0.8822 | 0.9191 | 0.0200 |
| TDRD1      | 0.8415 | 0.9521 | 0.9555 | 0.9273 | 0.9191 | 0.0266 |
| NOTCH2NL   | 0.8193 | 1.0899 | 0.9322 | 0.8349 | 0.9191 | 0.0622 |
| TMEM82     | 0.8926 | 1.0289 | 0.9248 | 0.8300 | 0.9191 | 0.0416 |
| C21orf56   | 0.8031 | 1.2191 | 0.8545 | 0.7997 | 0.9191 | 0.1008 |
| EXD2       | 0.8669 | 1.1651 | 0.9416 | 0.7030 | 0.9191 | 0.0959 |
| LOC651249  | 0.8958 | 0.9706 | 0.9302 | 0.8800 | 0.9191 | 0.0201 |
| FLJ41841   | 0.9168 | 1.0264 | 0.8608 | 0.8726 | 0.9191 | 0.0377 |
| LOC728070  | 0.9324 | 1.0194 | 0.9426 | 0.7822 | 0.9192 | 0.0496 |
| LOC1001323 | 0.8385 | 1.0869 | 0.9958 | 0.7554 | 0.9192 | 0.0749 |
| LOC1001328 | 0.8518 | 1.0054 | 0.9680 | 0.8514 | 0.9192 | 0.0397 |
| EPGN       | 0.9107 | 0.8903 | 1.0225 | 0.8533 | 0.9192 | 0.0364 |
| TAF13      | 0.6510 | 1.1892 | 1.0355 | 0.8011 | 0.9192 | 0.1198 |
| SNORA33    | 0.8167 | 0.9810 | 0.9231 | 0.9560 | 0.9192 | 0.0362 |
| LOC401098  | 0.7647 | 0.9743 | 1.2013 | 0.7365 | 0.9192 | 0.1079 |
| LRIT3      | 0.9094 | 1.0621 | 0.8833 | 0.8220 | 0.9192 | 0.0510 |
| ACOX2      | 0.7479 | 1.2250 | 0.9556 | 0.7484 | 0.9192 | 0.1130 |
| C9orf75    | 0.6902 | 1.2909 | 0.9175 | 0.7783 | 0.9193 | 0.1324 |
| LOC644756  | 0.8421 | 1.0320 | 0.9978 | 0.8051 | 0.9193 | 0.0562 |
| PLCB2      | 0.8709 | 0.9318 | 0.9951 | 0.8792 | 0.9193 | 0.0286 |
| RNF149     | 0.7354 | 1.3168 | 0.9615 | 0.6634 | 0.9193 | 0.1469 |
| C17orf78   | 0.9339 | 0.9058 | 0.9722 | 0.8653 | 0.9193 | 0.0226 |
| LOC1001335 | 0.8439 | 0.9838 | 0.9700 | 0.8797 | 0.9193 | 0.0341 |
| FLI1       | 0.7275 | 1.1263 | 1.0632 | 0.7604 | 0.9193 | 0.1023 |
| FNDC3A     | 0.8516 | 1.0161 | 0.9863 | 0.8234 | 0.9193 | 0.0480 |
| APOC1      | 0.7855 | 1.0800 | 0.8735 | 0.9384 | 0.9194 | 0.0620 |
| LOC648645  | 0.8950 | 0.9442 | 1.0048 | 0.8334 | 0.9194 | 0.0364 |
| MYADM      | 0.7333 | 1.2621 | 0.9499 | 0.7322 | 0.9194 | 0.1252 |
| MCTS1      | 0.8006 | 1.0268 | 1.1877 | 0.6624 | 0.9194 | 0.1168 |
| TNXA       | 0.9333 | 1.1178 | 0.9214 | 0.7051 | 0.9194 | 0.0844 |
| FLJ36848   | 0.8878 | 1.0951 | 0.8179 | 0.8767 | 0.9194 | 0.0606 |
| C14orf64   | 0.9284 | 0.9310 | 0.9722 | 0.8461 | 0.9194 | 0.0264 |
| NBPF22P    | 0.8259 | 1.0398 | 0.9345 | 0.8774 | 0.9194 | 0.0458 |
| FAM190B    | 0.7505 | 1.1279 | 0.9368 | 0.8627 | 0.9194 | 0.0793 |
| HSPG2      | 0.8561 | 0.9394 | 0.9724 | 0.9099 | 0.9194 | 0.0247 |
| HIST1H2BF  | 0.6585 | 1.3067 | 0.9976 | 0.7150 | 0.9195 | 0.1489 |
| STC1       | 0.8952 | 0.9987 | 0.9246 | 0.8594 | 0.9195 | 0.0296 |
| LOC1001307 | 0.9282 | 0.7942 | 1.0375 | 0.9180 | 0.9195 | 0.0497 |
| TOR2A      | 0.7667 | 1.0897 | 1.0144 | 0.8070 | 0.9195 | 0.0785 |
| CYYR1      | 0.8370 | 0.9567 | 0.9514 | 0.9328 | 0.9195 | 0.0280 |
| LOC729088  | 0.9145 | 0.9529 | 0.8738 | 0.9368 | 0.9195 | 0.0172 |
| ZNF439     | 0.8829 | 0.9617 | 0.9251 | 0.9084 | 0.9195 | 0.0165 |
| LOC1001329 | 0.8569 | 0.8848 | 0.9656 | 0.9708 | 0.9195 | 0.0287 |

|            |        |        |        |        |        |        |
|------------|--------|--------|--------|--------|--------|--------|
| CDK5R1     | 0.8926 | 1.0936 | 0.9261 | 0.7657 | 0.9195 | 0.0675 |
| KIAA1285   | 0.8039 | 1.2238 | 0.8613 | 0.7891 | 0.9195 | 0.1026 |
| LOC1001342 | 0.7571 | 1.0516 | 1.0514 | 0.8182 | 0.9196 | 0.0772 |
| LOC729985  | 0.8429 | 0.9117 | 1.1036 | 0.8200 | 0.9196 | 0.0644 |
| LOC1001336 | 0.8694 | 0.9295 | 0.7856 | 1.0938 | 0.9196 | 0.0651 |
| LOC652541  | 0.7717 | 1.0747 | 0.9951 | 0.8369 | 0.9196 | 0.0698 |
| C7orf59    | 0.7989 | 1.1330 | 0.9289 | 0.8177 | 0.9196 | 0.0767 |
| SMAD7      | 0.8332 | 1.1199 | 0.9423 | 0.7831 | 0.9196 | 0.0746 |
| LOC654209  | 0.8298 | 0.9588 | 0.9577 | 0.9322 | 0.9196 | 0.0306 |
| NBPF6      | 0.8338 | 0.9835 | 0.9716 | 0.8896 | 0.9196 | 0.0354 |
| LOC650549  | 0.9881 | 0.9840 | 0.8916 | 0.8148 | 0.9196 | 0.0414 |
| LOC643191  | 0.8775 | 1.0873 | 0.8332 | 0.8806 | 0.9196 | 0.0569 |
| LOC727773  | 0.8595 | 1.0454 | 0.9529 | 0.8208 | 0.9197 | 0.0503 |
| LOC652740  | 0.9978 | 0.9060 | 0.9007 | 0.8741 | 0.9197 | 0.0270 |
| LOC643451  | 0.9185 | 0.9958 | 0.9823 | 0.7820 | 0.9197 | 0.0489 |
| LOC650187  | 0.8110 | 0.9758 | 0.9726 | 0.9193 | 0.9197 | 0.0385 |
| CRIP1      | 0.7572 | 1.3135 | 0.9202 | 0.6878 | 0.9197 | 0.1400 |
| ZNF845     | 0.8133 | 1.2133 | 0.8953 | 0.7569 | 0.9197 | 0.1019 |
| IQCF2      | 0.9723 | 0.9992 | 0.8946 | 0.8128 | 0.9197 | 0.0420 |
| LOC650656  | 0.8674 | 1.0155 | 0.9568 | 0.8392 | 0.9197 | 0.0406 |
| NCF2       | 0.8339 | 1.0055 | 0.9469 | 0.8927 | 0.9197 | 0.0367 |
| C6orf218   | 0.8244 | 1.0227 | 0.8798 | 0.9523 | 0.9198 | 0.0431 |
| KIAA0556   | 1.0306 | 1.1431 | 0.8014 | 0.7041 | 0.9198 | 0.1011 |
| LOC641724  | 0.8276 | 0.9991 | 0.9846 | 0.8678 | 0.9198 | 0.0425 |
| MIR32      | 0.8137 | 1.0800 | 0.9384 | 0.8471 | 0.9198 | 0.0596 |
| ABI3       | 0.8213 | 1.1388 | 0.9370 | 0.7822 | 0.9198 | 0.0801 |
| NAT9       | 0.7959 | 1.3292 | 0.8473 | 0.7070 | 0.9199 | 0.1395 |
| LOC554235  | 0.9153 | 1.0398 | 0.8179 | 0.9065 | 0.9199 | 0.0456 |
| ZNF77      | 0.7931 | 1.1615 | 0.9679 | 0.7570 | 0.9199 | 0.0928 |
| MTM        | 0.8580 | 1.1853 | 0.9009 | 0.7353 | 0.9199 | 0.0952 |
| HEATR7A    | 0.8796 | 1.0253 | 0.9311 | 0.8436 | 0.9199 | 0.0395 |
| LOC645447  | 0.8864 | 1.0308 | 0.9480 | 0.8144 | 0.9199 | 0.0460 |
| C14orf179  | 0.8434 | 1.2936 | 0.8886 | 0.6540 | 0.9199 | 0.1345 |
| MLLT10     | 0.9223 | 1.1456 | 0.8393 | 0.7726 | 0.9200 | 0.0812 |
| CDH16      | 0.9150 | 1.0321 | 0.8523 | 0.8804 | 0.9200 | 0.0395 |
| MIR634     | 0.8642 | 1.0367 | 0.9217 | 0.8573 | 0.9200 | 0.0415 |
| LOC646590  | 0.7857 | 0.9908 | 0.9721 | 0.9313 | 0.9200 | 0.0465 |
| ZNF567     | 0.7604 | 1.2022 | 0.9389 | 0.7784 | 0.9200 | 0.1023 |
| ZNF586     | 0.8659 | 1.1913 | 0.8796 | 0.7432 | 0.9200 | 0.0955 |
| MOSPD1     | 0.8731 | 0.9101 | 0.9993 | 0.8976 | 0.9200 | 0.0275 |
| ZNF772     | 0.8542 | 1.1082 | 1.0552 | 0.6625 | 0.9200 | 0.1018 |
| LOC441506  | 0.6983 | 1.2162 | 1.1768 | 0.5887 | 0.9200 | 0.1614 |
| ALKBH4     | 0.8628 | 1.1390 | 0.8164 | 0.8619 | 0.9200 | 0.0738 |
| LOC1001340 | 0.9235 | 0.9685 | 0.9353 | 0.8529 | 0.9200 | 0.0243 |
| TUBB2A     | 0.7980 | 1.1516 | 1.0454 | 0.6851 | 0.9200 | 0.1078 |
| LOC93432   | 0.8334 | 1.0197 | 0.9578 | 0.8692 | 0.9200 | 0.0423 |

|            |        |        |        |        |        |        |
|------------|--------|--------|--------|--------|--------|--------|
| LOC653410  | 0.9483 | 0.8224 | 0.9836 | 0.9259 | 0.9201 | 0.0346 |
| TTY10      | 0.8779 | 0.9483 | 0.9387 | 0.9153 | 0.9201 | 0.0157 |
| ZNF717     | 0.8614 | 1.0950 | 1.0708 | 0.6530 | 0.9201 | 0.1033 |
| FAM71C     | 0.9493 | 0.9627 | 0.9973 | 0.7709 | 0.9201 | 0.0507 |
| RBP7       | 0.7812 | 1.0340 | 1.0684 | 0.7968 | 0.9201 | 0.0761 |
| SLC6A11    | 0.9860 | 0.9418 | 0.8948 | 0.8578 | 0.9201 | 0.0279 |
| MED17      | 0.8898 | 1.0412 | 0.9190 | 0.8304 | 0.9201 | 0.0444 |
| SRRM1L     | 0.8319 | 1.2478 | 0.8451 | 0.7555 | 0.9201 | 0.1110 |
| MGC16384   | 0.8126 | 1.1168 | 0.8858 | 0.8653 | 0.9201 | 0.0674 |
| ZNF768     | 0.8537 | 1.3247 | 0.8158 | 0.6864 | 0.9201 | 0.1395 |
| LOC401387  | 0.8642 | 0.9797 | 0.9696 | 0.8671 | 0.9201 | 0.0315 |
| LOC653094  | 0.9695 | 0.9456 | 0.9821 | 0.7834 | 0.9202 | 0.0462 |
| MYL7       | 0.8365 | 1.0111 | 0.9605 | 0.8726 | 0.9202 | 0.0399 |
| OSGIN1     | 0.8888 | 0.9904 | 0.9493 | 0.8522 | 0.9202 | 0.0308 |
| LOC1001330 | 0.9457 | 0.9291 | 0.9343 | 0.8716 | 0.9202 | 0.0166 |
| KDM5A      | 0.8941 | 0.9225 | 0.9901 | 0.8740 | 0.9202 | 0.0253 |
| ZNF592     | 0.8468 | 1.0755 | 0.9614 | 0.7972 | 0.9202 | 0.0621 |
| LRRC7      | 0.8573 | 1.0149 | 0.9894 | 0.8193 | 0.9202 | 0.0482 |
| CIB2       | 0.9009 | 0.9858 | 0.9512 | 0.8431 | 0.9202 | 0.0311 |
| LOC1001329 | 0.9384 | 1.0317 | 0.9620 | 0.7489 | 0.9202 | 0.0605 |
| LOC1001284 | 0.9086 | 0.9818 | 1.0169 | 0.7737 | 0.9202 | 0.0538 |
| LOC648974  | 0.8514 | 1.1061 | 0.9642 | 0.7594 | 0.9203 | 0.0748 |
| MIR30B     | 0.8512 | 0.9932 | 1.0164 | 0.8203 | 0.9203 | 0.0494 |
| LOC392459  | 0.8545 | 1.0408 | 0.9450 | 0.8409 | 0.9203 | 0.0463 |
| LOC441436  | 0.8593 | 1.0961 | 0.8330 | 0.8929 | 0.9203 | 0.0599 |
| LOC644538  | 0.9550 | 0.9833 | 0.9601 | 0.7830 | 0.9203 | 0.0462 |
| LOC1001316 | 0.8617 | 0.9434 | 0.9454 | 0.9308 | 0.9203 | 0.0198 |
| LOC643236  | 0.8829 | 0.9778 | 0.8636 | 0.9574 | 0.9204 | 0.0278 |
| POLB       | 0.7807 | 1.2277 | 0.9805 | 0.6929 | 0.9204 | 0.1188 |
| ZMYM3      | 0.9095 | 1.0671 | 0.8825 | 0.8226 | 0.9204 | 0.0521 |
| MIR215     | 0.8626 | 0.9717 | 0.9995 | 0.8479 | 0.9204 | 0.0382 |
| LOC649987  | 0.8474 | 1.0245 | 0.9123 | 0.8976 | 0.9204 | 0.0374 |
| GABRE      | 0.8933 | 1.0187 | 0.8455 | 0.9242 | 0.9204 | 0.0365 |
| RNU11      | 0.8849 | 1.1259 | 0.9273 | 0.7437 | 0.9205 | 0.0789 |
| TMEM30A    | 0.9048 | 1.0263 | 0.9613 | 0.7894 | 0.9205 | 0.0502 |
| DTD1       | 0.8590 | 1.3617 | 0.7650 | 0.6962 | 0.9205 | 0.1508 |
| ATF1       | 0.9698 | 0.9785 | 0.9672 | 0.7663 | 0.9205 | 0.0514 |
| LOC648972  | 0.7994 | 1.0170 | 0.9649 | 0.9006 | 0.9205 | 0.0468 |
| NKD1       | 0.8849 | 0.9799 | 1.0503 | 0.7669 | 0.9205 | 0.0614 |
| LOC653434  | 0.8255 | 1.1056 | 0.9300 | 0.8209 | 0.9205 | 0.0666 |
| ACTR10     | 0.8447 | 1.1494 | 0.9370 | 0.7509 | 0.9205 | 0.0852 |
| LOC401703  | 0.9375 | 0.9330 | 1.0525 | 0.7590 | 0.9205 | 0.0605 |
| ACIN1      | 0.7818 | 1.2064 | 0.8990 | 0.7948 | 0.9205 | 0.0988 |
| JMJD4      | 0.8633 | 1.1817 | 0.9126 | 0.7246 | 0.9205 | 0.0957 |
| LOC646492  | 0.7018 | 1.1212 | 0.9498 | 0.9093 | 0.9205 | 0.0862 |
| LOC649921  | 0.9115 | 0.9758 | 0.9338 | 0.8611 | 0.9206 | 0.0239 |

|            |        |        |        |        |        |        |
|------------|--------|--------|--------|--------|--------|--------|
| HSCB       | 0.8107 | 1.2125 | 0.8983 | 0.7607 | 0.9206 | 0.1014 |
| THADA      | 0.8451 | 1.1496 | 0.9012 | 0.7865 | 0.9206 | 0.0798 |
| HIST1H1E   | 0.8262 | 0.9786 | 0.9877 | 0.8900 | 0.9206 | 0.0384 |
| RFNG       | 0.8633 | 1.0999 | 1.0077 | 0.7115 | 0.9206 | 0.0850 |
| WHDC1L2    | 0.8926 | 1.0506 | 0.9082 | 0.8310 | 0.9206 | 0.0464 |
| MIR1908    | 0.9067 | 0.9988 | 0.9118 | 0.8653 | 0.9207 | 0.0281 |
| DKFZp779MC | 0.8558 | 1.0530 | 0.9445 | 0.8294 | 0.9207 | 0.0505 |
| DAPK2      | 0.9085 | 1.0672 | 0.9124 | 0.7948 | 0.9207 | 0.0559 |
| FANCL      | 0.8173 | 1.1291 | 0.8945 | 0.8419 | 0.9207 | 0.0713 |
| LOC654127  | 0.8022 | 0.9781 | 0.9845 | 0.9180 | 0.9207 | 0.0423 |
| SPEG       | 0.9219 | 1.1202 | 0.8320 | 0.8088 | 0.9207 | 0.0708 |
| LOC652627  | 0.7657 | 0.9930 | 0.9521 | 0.9721 | 0.9207 | 0.0523 |
| C6orf61    | 0.7816 | 1.2062 | 0.8742 | 0.8210 | 0.9207 | 0.0970 |
| NOTO       | 0.8535 | 0.9644 | 0.9956 | 0.8695 | 0.9208 | 0.0349 |
| XKRX       | 0.8251 | 1.0692 | 0.9003 | 0.8885 | 0.9208 | 0.0522 |
| ZNF121     | 0.8050 | 1.0425 | 1.0240 | 0.8116 | 0.9208 | 0.0651 |
| LOC644734  | 0.8767 | 1.0113 | 0.9846 | 0.8105 | 0.9208 | 0.0469 |
| GPD1L      | 0.7095 | 1.2648 | 0.9698 | 0.7390 | 0.9208 | 0.1286 |
| LOC392215  | 0.8691 | 1.0175 | 0.9408 | 0.8557 | 0.9208 | 0.0373 |
| SLC9A5     | 0.8717 | 1.0326 | 0.9824 | 0.7965 | 0.9208 | 0.0533 |
| LOC1001287 | 0.7677 | 1.1010 | 0.9962 | 0.8184 | 0.9208 | 0.0775 |
| OR2T34     | 0.8470 | 0.9736 | 0.9489 | 0.9139 | 0.9208 | 0.0275 |
| MMP10      | 0.8183 | 1.0243 | 0.9950 | 0.8458 | 0.9209 | 0.0519 |
| LOC644132  | 0.7698 | 1.2846 | 0.9137 | 0.7153 | 0.9209 | 0.1283 |
| GFRA3      | 0.9561 | 0.9159 | 0.9180 | 0.8935 | 0.9209 | 0.0130 |
| LOC652674  | 0.6863 | 0.9701 | 1.0000 | 1.0273 | 0.9209 | 0.0791 |
| PPIAL4C    | 0.8395 | 1.0241 | 1.0129 | 0.8072 | 0.9209 | 0.0568 |
| ANKRD13C   | 0.7183 | 1.0791 | 1.2123 | 0.6742 | 0.9210 | 0.1329 |
| LOC388681  | 0.9148 | 0.9169 | 1.0413 | 0.8109 | 0.9210 | 0.0471 |
| ATAD3C     | 0.8901 | 0.9238 | 1.0142 | 0.8557 | 0.9210 | 0.0340 |
| DIS3L2     | 0.8473 | 1.1187 | 0.8754 | 0.8424 | 0.9210 | 0.0663 |
| IRF9       | 0.8260 | 1.2762 | 0.8167 | 0.7651 | 0.9210 | 0.1192 |
| SNORA4     | 0.8446 | 0.9746 | 1.0356 | 0.8293 | 0.9210 | 0.0502 |
| SETD2      | 0.7968 | 1.2377 | 0.8877 | 0.7619 | 0.9210 | 0.1088 |
| FAM167B    | 0.8834 | 1.0604 | 0.8370 | 0.9033 | 0.9210 | 0.0485 |
| KRT78      | 0.9049 | 1.0599 | 0.8916 | 0.8279 | 0.9211 | 0.0492 |
| LOC650185  | 0.9051 | 0.9723 | 0.9898 | 0.8172 | 0.9211 | 0.0392 |
| LOC1000085 | 0.2929 | 1.1645 | 1.6061 | 0.6208 | 0.9211 | 0.2906 |
| LOC650689  | 0.8826 | 0.9980 | 0.9898 | 0.8140 | 0.9211 | 0.0443 |
| ZNF286A    | 0.8338 | 1.0964 | 0.8933 | 0.8608 | 0.9211 | 0.0597 |
| NEUROG2    | 0.8253 | 0.9200 | 0.9664 | 0.9730 | 0.9211 | 0.0341 |
| LOC729993  | 0.8507 | 1.0800 | 0.9966 | 0.7575 | 0.9212 | 0.0723 |
| LOC642688  | 0.9096 | 0.9177 | 1.0346 | 0.8229 | 0.9212 | 0.0435 |
| ACAP2      | 0.7575 | 1.2698 | 0.9365 | 0.7209 | 0.9212 | 0.1254 |
| TUSC3      | 0.8470 | 1.1171 | 0.9060 | 0.8147 | 0.9212 | 0.0680 |
| FLJ35409   | 0.8415 | 1.0102 | 0.9011 | 0.9321 | 0.9212 | 0.0351 |

|            |        |        |        |        |        |        |
|------------|--------|--------|--------|--------|--------|--------|
| ZIM2       | 0.8987 | 1.0393 | 0.9162 | 0.8306 | 0.9212 | 0.0435 |
| PAIP2B     | 0.8540 | 1.0765 | 0.7791 | 0.9752 | 0.9212 | 0.0657 |
| SGMS1      | 0.9400 | 1.2226 | 0.8066 | 0.7157 | 0.9212 | 0.1105 |
| AP3B1      | 0.7777 | 1.1787 | 0.9438 | 0.7848 | 0.9213 | 0.0940 |
| LOC642861  | 0.8824 | 1.0035 | 1.0001 | 0.7993 | 0.9213 | 0.0495 |
| HUNK       | 0.8526 | 1.0380 | 0.9271 | 0.8676 | 0.9213 | 0.0421 |
| KIAA1618   | 0.8404 | 1.1168 | 0.9577 | 0.7704 | 0.9213 | 0.0758 |
| PODN       | 0.8452 | 1.0011 | 0.9500 | 0.8891 | 0.9214 | 0.0342 |
| LOC344405  | 0.9118 | 1.0138 | 0.9359 | 0.8241 | 0.9214 | 0.0391 |
| OTUB1      | 0.8591 | 1.1090 | 0.9000 | 0.8175 | 0.9214 | 0.0648 |
| LOC731196  | 0.8666 | 1.0639 | 1.0093 | 0.7459 | 0.9214 | 0.0718 |
| ZNF323     | 0.8767 | 0.9955 | 1.0125 | 0.8009 | 0.9214 | 0.0503 |
| PTK7       | 0.8694 | 1.0619 | 0.9232 | 0.8311 | 0.9214 | 0.0505 |
| CSAG1      | 0.8305 | 1.2932 | 0.8307 | 0.7313 | 0.9214 | 0.1261 |
| NDUFS7     | 0.6818 | 1.2772 | 0.9406 | 0.7863 | 0.9214 | 0.1299 |
| GBAP       | 0.8597 | 1.0201 | 0.9100 | 0.8961 | 0.9215 | 0.0345 |
| TADA2A     | 0.8843 | 1.0126 | 0.9632 | 0.8257 | 0.9215 | 0.0414 |
| CBX8       | 0.8937 | 1.1759 | 0.8215 | 0.7947 | 0.9215 | 0.0874 |
| CFD        | 0.7358 | 1.1719 | 1.0343 | 0.7438 | 0.9215 | 0.1086 |
| CLK2       | 0.8206 | 1.1892 | 0.9557 | 0.7203 | 0.9215 | 0.1015 |
| OR7G2      | 0.9440 | 0.9863 | 0.9328 | 0.8228 | 0.9215 | 0.0349 |
| ZC3H5      | 0.8474 | 1.2514 | 0.8365 | 0.7507 | 0.9215 | 0.1121 |
| TTC30A     | 0.8671 | 1.2007 | 0.9138 | 0.7044 | 0.9215 | 0.1033 |
| LOC643590  | 0.9275 | 0.9682 | 0.9335 | 0.8569 | 0.9215 | 0.0233 |
| PDE4A      | 0.9702 | 1.0419 | 0.8637 | 0.8102 | 0.9215 | 0.0521 |
| SCNM1      | 0.7200 | 1.3085 | 0.9355 | 0.7221 | 0.9215 | 0.1385 |
| LOC730919  | 0.9748 | 0.9311 | 1.0000 | 0.7804 | 0.9215 | 0.0492 |
| C5orf44    | 0.7046 | 1.2879 | 1.0464 | 0.6473 | 0.9216 | 0.1506 |
| TRIM23     | 0.8006 | 1.1878 | 0.9099 | 0.7879 | 0.9216 | 0.0929 |
| IFT122     | 0.8530 | 1.0390 | 0.9613 | 0.8330 | 0.9216 | 0.0482 |
| C2CD4C     | 0.7844 | 1.0874 | 1.0057 | 0.8088 | 0.9216 | 0.0742 |
| LOC1001286 | 0.8328 | 1.1107 | 0.9839 | 0.7590 | 0.9216 | 0.0785 |
| NMS        | 0.9825 | 0.8543 | 0.9726 | 0.8770 | 0.9216 | 0.0327 |
| LOC728627  | 0.9176 | 1.0158 | 0.9683 | 0.7847 | 0.9216 | 0.0498 |
| ZNF747     | 0.9252 | 1.0685 | 0.9658 | 0.7270 | 0.9216 | 0.0715 |
| ANRIL      | 0.9446 | 1.1646 | 0.8183 | 0.7590 | 0.9216 | 0.0898 |
| HAUS5      | 0.8678 | 0.9758 | 0.9802 | 0.8628 | 0.9216 | 0.0326 |
| CCDC112    | 0.8834 | 1.1376 | 0.8859 | 0.7799 | 0.9217 | 0.0761 |
| KIR3DL3    | 0.9684 | 0.9599 | 0.9273 | 0.8312 | 0.9217 | 0.0314 |
| LOC642154  | 0.9139 | 1.0682 | 0.8764 | 0.8285 | 0.9217 | 0.0518 |
| LOC1001340 | 0.7995 | 0.9524 | 1.0279 | 0.9073 | 0.9218 | 0.0477 |
| SNORA16A   | 0.7718 | 1.0150 | 1.0690 | 0.8312 | 0.9218 | 0.0713 |
| LOC654159  | 0.9628 | 0.9714 | 0.9209 | 0.8321 | 0.9218 | 0.0319 |
| CARTPT     | 0.8973 | 1.1067 | 0.9494 | 0.7337 | 0.9218 | 0.0769 |
| MYOZ3      | 0.9244 | 0.8207 | 0.9796 | 0.9625 | 0.9218 | 0.0356 |
| SLC12A7    | 0.8186 | 1.0027 | 0.9310 | 0.9350 | 0.9218 | 0.0381 |

|            |        |        |        |        |        |        |
|------------|--------|--------|--------|--------|--------|--------|
| TMEM137    | 0.7040 | 1.1316 | 0.9957 | 0.8560 | 0.9218 | 0.0919 |
| C1orf189   | 0.8907 | 1.0123 | 0.9223 | 0.8622 | 0.9219 | 0.0325 |
| LOC652776  | 0.9636 | 0.9340 | 0.8690 | 0.9208 | 0.9219 | 0.0198 |
| LOC643159  | 0.8511 | 1.0198 | 0.9139 | 0.9027 | 0.9219 | 0.0354 |
| TRAF7      | 0.8221 | 1.0867 | 0.9495 | 0.8292 | 0.9219 | 0.0622 |
| ISOC1      | 0.6617 | 1.1662 | 1.1601 | 0.6996 | 0.9219 | 0.1395 |
| RASSF1     | 0.8096 | 1.0936 | 0.9597 | 0.8246 | 0.9219 | 0.0665 |
| LOC645586  | 0.7995 | 1.1548 | 0.8778 | 0.8555 | 0.9219 | 0.0793 |
| LOC651553  | 0.9200 | 1.1123 | 0.8286 | 0.8267 | 0.9219 | 0.0671 |
| FTL        | 0.7699 | 1.2917 | 0.9378 | 0.6882 | 0.9219 | 0.1338 |
| LOC1001343 | 0.8672 | 1.0361 | 0.9283 | 0.8561 | 0.9219 | 0.0412 |
| LAMP1      | 0.9139 | 1.2576 | 0.8824 | 0.6337 | 0.9219 | 0.1283 |
| HTATIP2    | 0.8294 | 1.0744 | 0.8800 | 0.9038 | 0.9219 | 0.0531 |
| C11orf46   | 0.7472 | 1.0546 | 1.1620 | 0.7239 | 0.9219 | 0.1099 |
| RGPD3      | 0.9591 | 1.0072 | 0.9638 | 0.7576 | 0.9219 | 0.0558 |
| NPHP1      | 0.8610 | 1.0475 | 0.9926 | 0.7866 | 0.9219 | 0.0597 |
| LOC1001290 | 1.0478 | 1.1058 | 0.8084 | 0.7257 | 0.9219 | 0.0918 |
| NRN1       | 0.8578 | 1.0932 | 0.9120 | 0.8251 | 0.9220 | 0.0598 |
| GAPDHL6    | 0.8396 | 1.1259 | 0.8572 | 0.8653 | 0.9220 | 0.0682 |
| LOC728477  | 0.9438 | 1.0591 | 0.7924 | 0.8927 | 0.9220 | 0.0555 |
| BCAR3      | 0.8408 | 1.2459 | 0.8844 | 0.7169 | 0.9220 | 0.1136 |
| KIAA1881   | 0.9128 | 0.9910 | 0.8721 | 0.9122 | 0.9220 | 0.0249 |
| LOC728752  | 0.8540 | 1.0026 | 0.9995 | 0.8320 | 0.9220 | 0.0459 |
| ERCC3      | 0.8450 | 1.1740 | 0.8402 | 0.8289 | 0.9220 | 0.0840 |
| G6PC3      | 0.8299 | 1.2706 | 0.9300 | 0.6577 | 0.9220 | 0.1291 |
| ULK2       | 0.8494 | 0.9803 | 1.0065 | 0.8520 | 0.9221 | 0.0415 |
| OR4C15     | 0.9163 | 1.0146 | 0.9575 | 0.7998 | 0.9221 | 0.0455 |
| FAM92A1    | 0.7477 | 0.9870 | 1.0265 | 0.9270 | 0.9221 | 0.0616 |
| LOC642369  | 0.9408 | 1.0523 | 0.8019 | 0.8933 | 0.9221 | 0.0521 |
| LOC731551  | 0.8863 | 0.9933 | 0.9390 | 0.8697 | 0.9221 | 0.0280 |
| LOC652854  | 0.9104 | 0.9586 | 0.9158 | 0.9035 | 0.9221 | 0.0124 |
| ZNF681     | 0.8763 | 0.9926 | 0.9531 | 0.8663 | 0.9221 | 0.0305 |
| C10orf31   | 0.8035 | 1.0901 | 0.9270 | 0.8678 | 0.9221 | 0.0614 |
| LOC1001336 | 0.8695 | 1.1167 | 0.9305 | 0.7717 | 0.9221 | 0.0727 |
| LOC646674  | 0.7263 | 1.2261 | 0.9248 | 0.8112 | 0.9221 | 0.1092 |
| TFAP2D     | 0.8758 | 1.0232 | 0.9402 | 0.8493 | 0.9221 | 0.0387 |
| MGC40499   | 0.8067 | 1.0956 | 0.9110 | 0.8754 | 0.9222 | 0.0617 |
| MYH4       | 0.9229 | 0.9902 | 0.9755 | 0.8000 | 0.9222 | 0.0432 |
| VPS26      | 0.8125 | 0.9603 | 1.0321 | 0.8838 | 0.9222 | 0.0475 |
| LOC1001316 | 0.9851 | 0.9523 | 0.8406 | 0.9107 | 0.9222 | 0.0312 |
| AGBL3      | 0.8912 | 0.8802 | 0.9464 | 0.9710 | 0.9222 | 0.0218 |
| ELAVL2     | 0.9398 | 0.9115 | 0.8994 | 0.9381 | 0.9222 | 0.0100 |
| LOC647297  | 0.7974 | 0.9929 | 0.9487 | 0.9498 | 0.9222 | 0.0429 |
| LOC730746  | 0.8065 | 1.1091 | 0.9139 | 0.8594 | 0.9222 | 0.0661 |
| C10orf95   | 0.9461 | 0.9796 | 0.9223 | 0.8409 | 0.9222 | 0.0296 |
| CLP1       | 0.7482 | 1.2828 | 0.9587 | 0.6994 | 0.9222 | 0.1327 |



|            |        |        |        |        |        |        |
|------------|--------|--------|--------|--------|--------|--------|
| FAM58B     | 0.8340 | 0.9196 | 1.0440 | 0.8913 | 0.9222 | 0.0443 |
| LOC642112  | 0.8627 | 1.0297 | 0.9563 | 0.8404 | 0.9222 | 0.0437 |
| LOC651296  | 1.0096 | 0.9087 | 0.9536 | 0.8172 | 0.9223 | 0.0406 |
| TIGD4      | 0.7375 | 1.0621 | 0.9726 | 0.9169 | 0.9223 | 0.0685 |
| FLJ13305   | 0.8705 | 0.9949 | 0.9800 | 0.8438 | 0.9223 | 0.0381 |
| FAM71F2    | 0.8266 | 1.0743 | 1.0134 | 0.7749 | 0.9223 | 0.0720 |
| CDK5R2     | 0.8547 | 1.0520 | 1.0025 | 0.7800 | 0.9223 | 0.0633 |
| SLC1A4     | 0.8877 | 1.1120 | 0.8136 | 0.8758 | 0.9223 | 0.0653 |
| LOC389722  | 0.8579 | 0.9000 | 0.9712 | 0.9601 | 0.9223 | 0.0266 |
| COPS2      | 0.7238 | 1.1396 | 1.0169 | 0.8090 | 0.9223 | 0.0950 |
| FLJ44342   | 0.7984 | 1.0528 | 0.9931 | 0.8451 | 0.9224 | 0.0601 |
| SNORA5A    | 0.7693 | 1.0300 | 1.0361 | 0.8541 | 0.9224 | 0.0662 |
| LOC388076  | 0.8059 | 0.9480 | 1.3689 | 0.5668 | 0.9224 | 0.1683 |
| LRRC37B2   | 0.7899 | 1.3645 | 0.8528 | 0.6824 | 0.9224 | 0.1515 |
| FERMT2     | 0.7817 | 1.2697 | 0.9441 | 0.6942 | 0.9224 | 0.1268 |
| OSTCL      | 0.6955 | 1.1257 | 1.0222 | 0.8463 | 0.9224 | 0.0951 |
| MYLPF      | 0.6711 | 1.1390 | 1.0035 | 0.8761 | 0.9224 | 0.0995 |
| LOC642879  | 0.9288 | 0.9808 | 0.9523 | 0.8279 | 0.9224 | 0.0333 |
| LOC649095  | 0.8046 | 1.1363 | 1.0254 | 0.7234 | 0.9225 | 0.0957 |
| CSN1S2B    | 0.8809 | 1.0582 | 0.8782 | 0.8724 | 0.9225 | 0.0453 |
| LOC1001318 | 0.7992 | 1.1088 | 1.0414 | 0.7404 | 0.9225 | 0.0900 |
| SNORA11B   | 0.9974 | 0.9941 | 0.8280 | 0.8704 | 0.9225 | 0.0432 |
| CLEC4F     | 0.9403 | 1.0588 | 0.9031 | 0.7876 | 0.9225 | 0.0559 |
| HIPK3      | 0.8683 | 0.9952 | 0.9608 | 0.8656 | 0.9225 | 0.0328 |
| LOC653533  | 0.8792 | 1.0226 | 0.9281 | 0.8600 | 0.9225 | 0.0363 |
| OSBPL6     | 0.8777 | 1.0041 | 0.9527 | 0.8555 | 0.9225 | 0.0342 |
| ECT2L      | 0.7528 | 1.1564 | 0.9272 | 0.8536 | 0.9225 | 0.0858 |
| FCHO2      | 0.8515 | 0.9801 | 1.0113 | 0.8470 | 0.9225 | 0.0428 |
| TBC1D8B    | 0.9201 | 1.0160 | 0.9269 | 0.8271 | 0.9225 | 0.0386 |
| LOC649458  | 0.8922 | 0.9441 | 0.9766 | 0.8772 | 0.9225 | 0.0230 |
| H1FNT      | 0.8169 | 0.9333 | 1.0939 | 0.8460 | 0.9225 | 0.0622 |
| MRS2P2     | 0.8942 | 1.0500 | 1.0117 | 0.7344 | 0.9225 | 0.0709 |
| MYOG       | 0.8823 | 1.0304 | 1.0198 | 0.7577 | 0.9225 | 0.0645 |
| LOC653711  | 0.8765 | 0.9971 | 0.9671 | 0.8495 | 0.9225 | 0.0354 |
| SLC6A19    | 0.9095 | 1.0181 | 0.9765 | 0.7862 | 0.9226 | 0.0507 |
| LOC648066  | 0.8248 | 1.0349 | 0.9233 | 0.9072 | 0.9226 | 0.0432 |
| LOC652588  | 0.8514 | 0.8948 | 1.0716 | 0.8725 | 0.9226 | 0.0505 |
| LOC441907  | 0.8182 | 1.0482 | 1.0373 | 0.7866 | 0.9226 | 0.0697 |
| LOC440341  | 0.9381 | 1.1335 | 0.8101 | 0.8087 | 0.9226 | 0.0766 |
| FTHL17     | 0.8704 | 1.0809 | 0.9779 | 0.7612 | 0.9226 | 0.0689 |
| LOC645843  | 0.9625 | 0.9792 | 0.9504 | 0.7982 | 0.9226 | 0.0419 |
| PRKCI      | 0.8653 | 0.9156 | 1.1543 | 0.7552 | 0.9226 | 0.0842 |
| PFDN4      | 0.9290 | 0.9342 | 1.0136 | 0.8136 | 0.9226 | 0.0412 |
| LOC642561  | 0.9103 | 1.0641 | 0.9503 | 0.7657 | 0.9226 | 0.0616 |
| LOC257054  | 0.8376 | 0.9756 | 0.9636 | 0.9137 | 0.9226 | 0.0314 |
| ZNF828     | 0.8191 | 1.3372 | 0.8583 | 0.6759 | 0.9226 | 0.1436 |

|            |        |        |        |        |        |        |
|------------|--------|--------|--------|--------|--------|--------|
| LOC652335  | 0.9494 | 0.9165 | 0.9809 | 0.8437 | 0.9226 | 0.0294 |
| DVL1       | 0.9099 | 1.0666 | 0.9061 | 0.8079 | 0.9226 | 0.0535 |
| MTMR2      | 0.9221 | 1.1655 | 0.8653 | 0.7378 | 0.9227 | 0.0897 |
| LOC646686  | 0.9392 | 0.8765 | 0.9579 | 0.9170 | 0.9227 | 0.0175 |
| LOC644345  | 0.8542 | 1.0983 | 0.8398 | 0.8984 | 0.9227 | 0.0598 |
| LOC647471  | 0.8544 | 1.0676 | 0.9501 | 0.8186 | 0.9227 | 0.0557 |
| ABCC5      | 0.9004 | 1.1266 | 0.9057 | 0.7580 | 0.9227 | 0.0761 |
| CH25H      | 0.8568 | 0.9527 | 1.0016 | 0.8796 | 0.9227 | 0.0333 |
| ATPBD1B    | 0.8049 | 1.1752 | 0.9676 | 0.7431 | 0.9227 | 0.0966 |
| MTUS1      | 0.8708 | 1.0868 | 0.8924 | 0.8408 | 0.9227 | 0.0557 |
| CCDC78     | 0.8490 | 1.0436 | 0.9119 | 0.8865 | 0.9227 | 0.0423 |
| RHEBL1     | 0.8827 | 1.0148 | 0.8933 | 0.9000 | 0.9227 | 0.0309 |
| LOC647543  | 1.0377 | 0.9793 | 0.8236 | 0.8507 | 0.9228 | 0.0512 |
| LOC650152  | 0.7911 | 1.1901 | 1.0442 | 0.6658 | 0.9228 | 0.1189 |
| ECM2       | 0.8821 | 0.9669 | 0.9465 | 0.8957 | 0.9228 | 0.0202 |
| CIAO1      | 0.7135 | 1.3557 | 0.9687 | 0.6534 | 0.9228 | 0.1597 |
| LOXL3      | 0.8244 | 1.0483 | 0.9482 | 0.8704 | 0.9228 | 0.0490 |
| LOC391044  | 0.8507 | 1.0849 | 0.8764 | 0.8795 | 0.9229 | 0.0544 |
| LOC1001289 | 0.8703 | 1.0360 | 0.9899 | 0.7954 | 0.9229 | 0.0550 |
| LOC1001319 | 0.9064 | 1.0167 | 0.8721 | 0.8964 | 0.9229 | 0.0321 |
| GPATC4     | 0.7625 | 1.0625 | 0.8934 | 0.9732 | 0.9229 | 0.0636 |
| C19orf30   | 0.7561 | 1.0981 | 1.0148 | 0.8227 | 0.9229 | 0.0801 |
| LOC647363  | 0.7718 | 1.1344 | 1.0543 | 0.7312 | 0.9229 | 0.1007 |
| LOC654340  | 0.9105 | 1.0169 | 0.9232 | 0.8412 | 0.9229 | 0.0361 |
| PIP4K2C    | 0.9360 | 1.3144 | 0.7839 | 0.6576 | 0.9230 | 0.1423 |
| LOC642321  | 0.8694 | 1.0346 | 0.9121 | 0.8759 | 0.9230 | 0.0384 |
| FAM13A     | 0.8698 | 1.1850 | 0.9084 | 0.7288 | 0.9230 | 0.0955 |
| GPR15      | 0.8881 | 1.0006 | 0.8728 | 0.9304 | 0.9230 | 0.0286 |
| HSP90AB6P  | 0.8659 | 0.9400 | 0.9890 | 0.8971 | 0.9230 | 0.0267 |
| IL20       | 0.8625 | 0.9951 | 0.9288 | 0.9056 | 0.9230 | 0.0277 |
| LRRC31     | 0.8601 | 1.1046 | 0.9064 | 0.8209 | 0.9230 | 0.0630 |
| LOC644350  | 0.8039 | 1.0146 | 1.0165 | 0.8572 | 0.9230 | 0.0545 |
| LOC644799  | 0.8399 | 1.2580 | 0.9627 | 0.6315 | 0.9230 | 0.1309 |
| NCRNA00157 | 0.8238 | 0.9785 | 1.0125 | 0.8773 | 0.9231 | 0.0438 |
| ROBLD3     | 0.7690 | 1.3985 | 0.8077 | 0.7170 | 0.9231 | 0.1596 |
| PHC2       | 0.8992 | 1.1005 | 0.8847 | 0.8078 | 0.9231 | 0.0624 |
| SNORA28    | 0.8288 | 1.0575 | 1.0332 | 0.7729 | 0.9231 | 0.0717 |
| LOC653563  | 0.9003 | 1.0538 | 0.9228 | 0.8156 | 0.9231 | 0.0493 |
| GLB1L3     | 0.9188 | 0.9963 | 0.9046 | 0.8728 | 0.9231 | 0.0262 |
| BZW1       | 0.8933 | 1.0070 | 0.9592 | 0.8330 | 0.9231 | 0.0380 |
| NMUR1      | 0.8664 | 0.9535 | 0.9667 | 0.9059 | 0.9231 | 0.0230 |
| ITIH5      | 0.7248 | 1.3217 | 0.9300 | 0.7160 | 0.9231 | 0.1418 |
| LOC1001330 | 0.8242 | 1.0489 | 1.0105 | 0.8091 | 0.9232 | 0.0621 |
| LOC283849  | 0.9543 | 0.9894 | 0.8874 | 0.8617 | 0.9232 | 0.0295 |
| LOC400879  | 0.7180 | 1.2330 | 1.0106 | 0.7312 | 0.9232 | 0.1233 |
| LOC653092  | 0.8823 | 1.0629 | 0.8775 | 0.8701 | 0.9232 | 0.0466 |

|            |        |        |        |        |        |        |
|------------|--------|--------|--------|--------|--------|--------|
| RNF112     | 0.7640 | 1.1728 | 0.9344 | 0.8216 | 0.9232 | 0.0904 |
| F11        | 0.7073 | 1.0345 | 1.0613 | 0.8898 | 0.9232 | 0.0812 |
| LOC653113  | 0.9269 | 1.0216 | 0.9568 | 0.7875 | 0.9232 | 0.0494 |
| DKFZp434M1 | 0.9232 | 0.9932 | 0.8874 | 0.8891 | 0.9232 | 0.0247 |
| TMEM76     | 0.8648 | 1.0611 | 0.9965 | 0.7706 | 0.9232 | 0.0652 |
| PC         | 0.8848 | 1.0947 | 0.9322 | 0.7813 | 0.9233 | 0.0653 |
| SLC9A6     | 0.8645 | 1.0994 | 0.9066 | 0.8227 | 0.9233 | 0.0612 |
| CALR       | 0.8430 | 1.1682 | 0.9396 | 0.7423 | 0.9233 | 0.0910 |
| PRKDC      | 0.8061 | 1.1787 | 0.9100 | 0.7984 | 0.9233 | 0.0888 |
| DUX1       | 0.8710 | 1.0103 | 0.9774 | 0.8345 | 0.9233 | 0.0419 |
| NBPF4      | 0.8537 | 0.9729 | 0.9535 | 0.9131 | 0.9233 | 0.0263 |
| RNF182     | 0.8732 | 1.0242 | 0.9716 | 0.8242 | 0.9233 | 0.0455 |
| MINA       | 0.8767 | 1.0479 | 0.9739 | 0.7948 | 0.9233 | 0.0554 |
| LOC648814  | 0.8992 | 0.9430 | 1.0047 | 0.8464 | 0.9233 | 0.0336 |
| TIGD1      | 0.8971 | 0.9614 | 0.9698 | 0.8649 | 0.9233 | 0.0253 |
| LOC728537  | 0.8143 | 1.0036 | 0.9695 | 0.9059 | 0.9233 | 0.0416 |
| ZSCAN22    | 0.8344 | 1.1668 | 0.8467 | 0.8454 | 0.9233 | 0.0812 |
| LOC649908  | 0.8755 | 1.0952 | 0.8948 | 0.8280 | 0.9234 | 0.0590 |
| MIR1178    | 0.8083 | 0.9914 | 1.0641 | 0.8296 | 0.9234 | 0.0622 |
| SASH1      | 0.8763 | 1.2204 | 0.9764 | 0.6206 | 0.9234 | 0.1241 |
| LOC387683  | 0.8241 | 1.0765 | 0.9240 | 0.8690 | 0.9234 | 0.0550 |
| LOC126661  | 0.8839 | 0.9057 | 0.9308 | 0.9732 | 0.9234 | 0.0192 |
| KRT83      | 0.9447 | 0.9651 | 0.9525 | 0.8315 | 0.9234 | 0.0309 |
| LOC645363  | 0.8599 | 1.0623 | 0.8964 | 0.8751 | 0.9234 | 0.0469 |
| MAP7D3     | 0.9277 | 0.9641 | 0.9877 | 0.8142 | 0.9234 | 0.0384 |
| C21orf84   | 0.9455 | 0.8608 | 0.9739 | 0.9136 | 0.9235 | 0.0243 |
| INPP5B     | 0.8552 | 1.0538 | 0.9369 | 0.8480 | 0.9235 | 0.0479 |
| ARRB2      | 0.9085 | 1.0453 | 0.9132 | 0.8268 | 0.9235 | 0.0452 |
| GPRIN1     | 0.7697 | 1.0051 | 0.9420 | 0.9771 | 0.9235 | 0.0529 |
| LOC1001314 | 0.8341 | 1.0361 | 0.9754 | 0.8483 | 0.9235 | 0.0492 |
| LOC653242  | 0.7243 | 1.1553 | 0.8992 | 0.9151 | 0.9235 | 0.0885 |
| ZNF254     | 0.8799 | 1.0210 | 1.0379 | 0.7551 | 0.9235 | 0.0664 |
| LOC728485  | 0.9163 | 1.0542 | 0.9067 | 0.8168 | 0.9235 | 0.0490 |
| TMEM110    | 0.8187 | 1.1767 | 0.9290 | 0.7696 | 0.9235 | 0.0907 |
| GSTO2      | 0.8237 | 1.0769 | 1.0471 | 0.7464 | 0.9235 | 0.0817 |
| ALG10      | 0.8979 | 1.1268 | 0.9005 | 0.7689 | 0.9235 | 0.0744 |
| LOC646829  | 0.8859 | 0.9751 | 0.9264 | 0.9067 | 0.9235 | 0.0191 |
| LOC390705  | 0.8827 | 0.9258 | 0.9768 | 0.9088 | 0.9235 | 0.0199 |
| LOC728689  | 0.8140 | 1.0810 | 0.9274 | 0.8720 | 0.9236 | 0.0573 |
| ST7L       | 0.8058 | 1.1096 | 1.0092 | 0.7698 | 0.9236 | 0.0814 |
| LOC650518  | 0.7469 | 1.1968 | 1.0212 | 0.7295 | 0.9236 | 0.1129 |
| TMEM165    | 0.7582 | 1.3130 | 0.9209 | 0.7024 | 0.9236 | 0.1378 |
| KRT18P28   | 1.0093 | 1.0278 | 0.9157 | 0.7418 | 0.9236 | 0.0654 |
| PRICKLE3   | 0.8538 | 0.9362 | 0.9660 | 0.9385 | 0.9236 | 0.0243 |
| LOC652331  | 0.8799 | 0.9054 | 1.0086 | 0.9007 | 0.9237 | 0.0288 |
| CYMP       | 0.9458 | 1.0211 | 0.8542 | 0.8735 | 0.9237 | 0.0380 |

|            |        |        |        |        |        |        |
|------------|--------|--------|--------|--------|--------|--------|
| NOSIP      | 0.7924 | 1.1952 | 0.9159 | 0.7912 | 0.9237 | 0.0951 |
| MIR875     | 0.8857 | 0.9819 | 0.9324 | 0.8947 | 0.9237 | 0.0219 |
| CD68       | 0.7269 | 1.1025 | 1.0229 | 0.8426 | 0.9237 | 0.0852 |
| ZNF486     | 0.7404 | 1.2909 | 0.9692 | 0.6945 | 0.9237 | 0.1363 |
| CCR4       | 0.8606 | 1.0493 | 0.9428 | 0.8422 | 0.9237 | 0.0472 |
| LOC729533  | 0.8706 | 1.0079 | 0.9077 | 0.9088 | 0.9237 | 0.0294 |
| SLC12A9    | 0.7575 | 1.2626 | 0.9145 | 0.7604 | 0.9237 | 0.1188 |
| LOC653895  | 0.7934 | 1.1955 | 0.9664 | 0.7397 | 0.9238 | 0.1027 |
| C1orf102   | 0.8110 | 1.2306 | 0.8724 | 0.7810 | 0.9238 | 0.1040 |
| LOC1001291 | 0.9381 | 0.9056 | 1.0234 | 0.8281 | 0.9238 | 0.0404 |
| TRMT6      | 0.7987 | 1.0347 | 1.1317 | 0.7300 | 0.9238 | 0.0952 |
| FLJ33360   | 0.8603 | 1.0042 | 0.9591 | 0.8716 | 0.9238 | 0.0347 |
| RAB27A     | 0.8849 | 1.0798 | 0.9742 | 0.7564 | 0.9238 | 0.0686 |
| LOC285941  | 0.9801 | 0.8528 | 0.9781 | 0.8843 | 0.9238 | 0.0325 |
| FAM30A     | 0.9587 | 0.9904 | 0.9070 | 0.8393 | 0.9238 | 0.0330 |
| MAN1B1     | 0.9422 | 1.2867 | 0.8458 | 0.6207 | 0.9238 | 0.1384 |
| LOC651268  | 0.8455 | 1.0596 | 0.9704 | 0.8200 | 0.9239 | 0.0559 |
| MIR543     | 0.8415 | 0.9959 | 1.0315 | 0.8265 | 0.9239 | 0.0525 |
| HTRA1      | 0.7577 | 1.1234 | 1.0914 | 0.7230 | 0.9239 | 0.1064 |
| MED1       | 0.7398 | 1.1819 | 1.0819 | 0.6922 | 0.9239 | 0.1222 |
| EFEMP2     | 0.9594 | 0.9799 | 0.9162 | 0.8403 | 0.9239 | 0.0309 |
| LOC388559  | 0.8845 | 1.0267 | 0.9487 | 0.8358 | 0.9239 | 0.0413 |
| PLAGL2     | 0.9172 | 1.2211 | 0.7968 | 0.7608 | 0.9240 | 0.1045 |
| PNKD       | 0.8815 | 1.1400 | 0.9351 | 0.7393 | 0.9240 | 0.0830 |
| LOC402562  | 0.8280 | 1.0504 | 0.9096 | 0.9080 | 0.9240 | 0.0462 |
| LOC440302  | 0.8890 | 1.0482 | 0.9494 | 0.8095 | 0.9240 | 0.0503 |
| CCNDBP1    | 0.9743 | 1.1603 | 0.8441 | 0.7174 | 0.9240 | 0.0946 |
| RUNDC2B    | 0.8277 | 1.0530 | 1.0091 | 0.8064 | 0.9240 | 0.0626 |
| AIM1L      | 0.8912 | 0.9837 | 0.9215 | 0.8998 | 0.9240 | 0.0209 |
| DENND4C    | 0.8780 | 1.2693 | 0.8574 | 0.6914 | 0.9240 | 0.1224 |
| KIF4B      | 0.6981 | 1.0999 | 1.0018 | 0.8965 | 0.9241 | 0.0860 |
| EDG1       | 0.8411 | 1.0326 | 1.0749 | 0.7477 | 0.9241 | 0.0777 |
| LOC650724  | 0.8057 | 0.8680 | 1.1011 | 0.9214 | 0.9241 | 0.0636 |
| FNDC4      | 0.8977 | 1.0312 | 0.8709 | 0.8966 | 0.9241 | 0.0362 |
| TATDN3     | 0.7433 | 1.2961 | 0.9677 | 0.6894 | 0.9241 | 0.1379 |
| CHRNA6     | 0.7887 | 0.9889 | 0.9309 | 0.9881 | 0.9241 | 0.0471 |
| LOC1001296 | 0.8413 | 0.9479 | 1.0596 | 0.8477 | 0.9241 | 0.0513 |
| PELI3      | 0.8013 | 1.0429 | 0.9759 | 0.8764 | 0.9241 | 0.0534 |
| MFSD2      | 0.8547 | 1.0647 | 0.9281 | 0.8491 | 0.9241 | 0.0502 |
| LOC1001327 | 0.8178 | 1.0064 | 1.1239 | 0.7485 | 0.9242 | 0.0860 |
| FUT1       | 0.8275 | 1.1155 | 0.9167 | 0.8370 | 0.9242 | 0.0668 |
| FLJ30058   | 0.8494 | 0.9751 | 0.9751 | 0.8972 | 0.9242 | 0.0309 |
| TBL1X      | 0.8457 | 1.1210 | 0.9321 | 0.7980 | 0.9242 | 0.0712 |
| LILRP2     | 0.8877 | 1.0551 | 0.9112 | 0.8429 | 0.9242 | 0.0459 |
| CCR5       | 0.8873 | 0.9200 | 1.0996 | 0.7900 | 0.9242 | 0.0646 |
| NRN1L      | 0.8125 | 1.0070 | 0.9375 | 0.9398 | 0.9242 | 0.0406 |

|            |        |        |        |        |        |        |
|------------|--------|--------|--------|--------|--------|--------|
| CHRN3      | 0.9281 | 1.0002 | 0.8603 | 0.9083 | 0.9242 | 0.0290 |
| LOC646278  | 0.8517 | 1.0577 | 0.9788 | 0.8087 | 0.9242 | 0.0573 |
| LOC1001343 | 0.8057 | 1.0415 | 0.9772 | 0.8725 | 0.9242 | 0.0527 |
| CTTNBP2NL  | 0.9510 | 0.9963 | 0.9559 | 0.7938 | 0.9242 | 0.0447 |
| MUC21      | 0.7471 | 1.0525 | 0.9713 | 0.9261 | 0.9242 | 0.0646 |
| DERL2      | 0.8391 | 1.2004 | 1.0608 | 0.5968 | 0.9243 | 0.1321 |
| RPS26P10   | 0.8449 | 1.0443 | 0.9807 | 0.8271 | 0.9243 | 0.0527 |
| NCRNA00081 | 0.9141 | 1.0572 | 0.9646 | 0.7612 | 0.9243 | 0.0619 |
| AK2P2      | 0.8327 | 1.0362 | 0.9101 | 0.9181 | 0.9243 | 0.0420 |
| MYF5       | 0.7903 | 1.0482 | 0.9581 | 0.9005 | 0.9243 | 0.0540 |
| LOC652651  | 0.8805 | 1.0247 | 0.9484 | 0.8436 | 0.9243 | 0.0399 |
| LOC644885  | 0.9478 | 0.8106 | 1.0626 | 0.8761 | 0.9243 | 0.0539 |
| USP18      | 0.9346 | 1.0427 | 1.0541 | 0.6657 | 0.9243 | 0.0903 |
| LOC1001326 | 0.8685 | 0.8881 | 1.0111 | 0.9296 | 0.9243 | 0.0316 |
| SDHALP1    | 0.8474 | 1.1306 | 0.9102 | 0.8091 | 0.9243 | 0.0718 |
| CC2D2A     | 0.9200 | 1.0878 | 0.8531 | 0.8365 | 0.9243 | 0.0574 |
| HLA-A29.1  | 0.8589 | 1.1712 | 0.8673 | 0.8000 | 0.9243 | 0.0836 |
| LOC130773  | 0.9171 | 1.1899 | 0.9120 | 0.6782 | 0.9243 | 0.1046 |
| MED28      | 0.6441 | 1.3564 | 0.9757 | 0.7211 | 0.9243 | 0.1605 |
| SHKBP1     | 0.9461 | 1.1038 | 0.8802 | 0.7672 | 0.9243 | 0.0703 |
| LOC643384  | 0.7795 | 1.2880 | 0.8799 | 0.7498 | 0.9243 | 0.1244 |
| RPGR       | 0.8793 | 1.0467 | 0.9458 | 0.8256 | 0.9243 | 0.0476 |
| GADD45G    | 0.8167 | 1.1587 | 0.9561 | 0.7661 | 0.9244 | 0.0878 |
| ARP11      | 0.7840 | 1.0682 | 1.0856 | 0.7600 | 0.9244 | 0.0882 |
| CSPP1      | 0.8625 | 1.1824 | 0.8496 | 0.8032 | 0.9244 | 0.0869 |
| MIR558     | 0.8289 | 1.0275 | 0.9900 | 0.8513 | 0.9244 | 0.0495 |
| FGFBP3     | 0.8313 | 1.0631 | 0.9334 | 0.8699 | 0.9244 | 0.0508 |
| TSPAN5     | 0.8262 | 1.0957 | 0.9639 | 0.8119 | 0.9245 | 0.0666 |
| TMC1       | 0.7780 | 1.0096 | 0.9808 | 0.9294 | 0.9245 | 0.0516 |
| CNNM2      | 0.8543 | 1.0338 | 0.9803 | 0.8295 | 0.9245 | 0.0492 |
| GAN        | 0.8694 | 1.0106 | 0.9879 | 0.8302 | 0.9245 | 0.0441 |
| LOC651302  | 0.7748 | 1.1188 | 0.9601 | 0.8443 | 0.9245 | 0.0752 |
| LOC731444  | 0.8419 | 1.2179 | 0.8489 | 0.7894 | 0.9245 | 0.0987 |
| ZSCAN2     | 0.8713 | 1.1584 | 0.8192 | 0.8491 | 0.9245 | 0.0787 |
| CCS        | 0.7820 | 1.2292 | 0.8891 | 0.7977 | 0.9245 | 0.1043 |
| CP110      | 0.8063 | 1.0875 | 1.0004 | 0.8039 | 0.9245 | 0.0712 |
| KCTD9      | 0.9077 | 1.0127 | 0.9937 | 0.7840 | 0.9245 | 0.0521 |
| ATXN3      | 0.8017 | 1.1845 | 0.8228 | 0.8891 | 0.9245 | 0.0886 |
| NAP1L4     | 0.7262 | 1.3420 | 0.8940 | 0.7359 | 0.9245 | 0.1444 |
| LOC647370  | 0.8073 | 1.1282 | 0.9740 | 0.7886 | 0.9245 | 0.0797 |
| DGAT1      | 0.7922 | 1.1860 | 0.9588 | 0.7613 | 0.9246 | 0.0973 |
| LOC1001328 | 0.8781 | 1.1318 | 0.9236 | 0.7647 | 0.9246 | 0.0767 |
| SOAT1      | 0.9488 | 0.9729 | 1.0304 | 0.7462 | 0.9246 | 0.0619 |
| LOC643435  | 0.9114 | 1.0199 | 0.9684 | 0.7986 | 0.9246 | 0.0475 |
| PWWP2B     | 0.7798 | 1.2580 | 0.8669 | 0.7936 | 0.9246 | 0.1128 |
| ARAF       | 0.6620 | 1.2391 | 1.0029 | 0.7943 | 0.9246 | 0.1261 |

|            |        |        |        |        |        |        |
|------------|--------|--------|--------|--------|--------|--------|
| LOC1001339 | 0.8537 | 0.9489 | 1.0141 | 0.8816 | 0.9246 | 0.0359 |
| CSPG4LYP2  | 0.9567 | 0.9536 | 0.9446 | 0.8435 | 0.9246 | 0.0272 |
| EXOC4      | 0.7257 | 1.2136 | 1.0452 | 0.7139 | 0.9246 | 0.1232 |
| LCN15      | 0.9125 | 1.0757 | 0.8767 | 0.8335 | 0.9246 | 0.0529 |
| MRC2       | 0.9474 | 1.0032 | 0.9724 | 0.7754 | 0.9246 | 0.0510 |
| LOC642781  | 0.9015 | 1.1366 | 0.9813 | 0.6790 | 0.9246 | 0.0953 |
| LOC647187  | 0.9791 | 1.0591 | 0.8627 | 0.7976 | 0.9246 | 0.0585 |
| LOC729510  | 0.8936 | 0.9951 | 0.9330 | 0.8767 | 0.9246 | 0.0263 |
| DHRS7B     | 0.7576 | 1.2740 | 1.0531 | 0.6138 | 0.9246 | 0.1481 |
| CSNK2A2    | 0.7322 | 1.3712 | 0.9231 | 0.6719 | 0.9246 | 0.1582 |
| LOC1001344 | 0.8895 | 0.9741 | 1.0247 | 0.8102 | 0.9246 | 0.0472 |
| H1FX       | 0.9428 | 1.1796 | 0.8616 | 0.7145 | 0.9246 | 0.0972 |
| EXPH5      | 0.6679 | 1.2804 | 0.9202 | 0.8301 | 0.9246 | 0.1296 |
| LOC96610   | 0.7867 | 1.1270 | 1.0905 | 0.6944 | 0.9247 | 0.1082 |
| NR3C1      | 0.8404 | 1.0432 | 0.9255 | 0.8896 | 0.9247 | 0.0432 |
| LOC728444  | 1.0261 | 0.9501 | 0.8823 | 0.8401 | 0.9247 | 0.0407 |
| PCDHB2     | 0.8571 | 1.1756 | 0.9544 | 0.7116 | 0.9247 | 0.0974 |
| TSSK4      | 0.9033 | 1.0576 | 0.8910 | 0.8471 | 0.9248 | 0.0459 |
| LOC645304  | 0.9109 | 1.0701 | 0.9243 | 0.7938 | 0.9248 | 0.0566 |
| C6orf68    | 0.8220 | 1.0221 | 1.0147 | 0.8403 | 0.9248 | 0.0542 |
| FBXL19     | 0.8884 | 0.9473 | 0.9518 | 0.9117 | 0.9248 | 0.0151 |
| LOC339778  | 0.7494 | 1.0782 | 1.0008 | 0.8707 | 0.9248 | 0.0725 |
| LOC1001292 | 0.9655 | 0.9251 | 0.9685 | 0.8402 | 0.9248 | 0.0299 |
| LOC650399  | 0.9075 | 0.9580 | 1.0404 | 0.7934 | 0.9248 | 0.0517 |
| LOC1001348 | 0.9311 | 0.9889 | 0.9391 | 0.8403 | 0.9248 | 0.0310 |
| C20orf127  | 0.7895 | 1.0928 | 0.9769 | 0.8401 | 0.9248 | 0.0686 |
| LOC728503  | 0.8632 | 1.0015 | 1.0187 | 0.8159 | 0.9248 | 0.0503 |
| LOC654078  | 0.8715 | 0.9467 | 1.0322 | 0.8490 | 0.9248 | 0.0414 |
| ZNF600     | 0.9182 | 0.9664 | 0.9146 | 0.9002 | 0.9249 | 0.0144 |
| LOC642341  | 0.8845 | 0.9983 | 0.9767 | 0.8398 | 0.9249 | 0.0376 |
| LOC346085  | 0.9385 | 1.0749 | 0.9422 | 0.7438 | 0.9249 | 0.0682 |
| LOC646806  | 0.7801 | 0.9403 | 0.9998 | 0.9793 | 0.9249 | 0.0498 |
| LRFN3      | 0.9042 | 1.1814 | 0.8372 | 0.7767 | 0.9249 | 0.0894 |
| NBPF10     | 0.7822 | 1.3603 | 0.8204 | 0.7367 | 0.9249 | 0.1461 |
| TMEM77     | 0.8737 | 1.0715 | 0.9962 | 0.7583 | 0.9249 | 0.0689 |
| TAF10      | 0.7331 | 1.2018 | 1.0075 | 0.7573 | 0.9249 | 0.1112 |
| LOC728809  | 0.6538 | 1.2241 | 1.0766 | 0.7451 | 0.9249 | 0.1349 |
| RPL23AP53  | 0.7931 | 1.1519 | 0.9406 | 0.8140 | 0.9249 | 0.0824 |
| EHD2       | 0.7422 | 1.1248 | 0.9702 | 0.8625 | 0.9249 | 0.0813 |
| LOC652579  | 0.9289 | 0.9681 | 0.9421 | 0.8606 | 0.9249 | 0.0229 |
| C8G        | 0.8356 | 0.9507 | 1.0700 | 0.8434 | 0.9249 | 0.0550 |
| JDP2       | 1.0365 | 1.0273 | 0.8436 | 0.7923 | 0.9249 | 0.0627 |
| LOC1001342 | 0.8570 | 1.0640 | 0.9013 | 0.8775 | 0.9250 | 0.0472 |
| C9orf4     | 0.8928 | 0.9708 | 0.9798 | 0.8564 | 0.9250 | 0.0301 |
| TXNDC8     | 0.7908 | 1.1130 | 0.9936 | 0.8025 | 0.9250 | 0.0780 |
| UNC50      | 0.7412 | 1.3233 | 0.9059 | 0.7296 | 0.9250 | 0.1387 |

|            |        |        |        |        |        |        |
|------------|--------|--------|--------|--------|--------|--------|
| RARG       | 0.7998 | 1.1298 | 0.9355 | 0.8350 | 0.9250 | 0.0741 |
| ICOS       | 0.7153 | 1.1019 | 1.0350 | 0.8479 | 0.9250 | 0.0882 |
| LOC1001312 | 0.8652 | 1.0020 | 1.0442 | 0.7886 | 0.9250 | 0.0594 |
| C2orf58    | 0.8653 | 1.0043 | 0.9371 | 0.8935 | 0.9250 | 0.0303 |
| CCND3      | 0.7251 | 1.2235 | 0.9831 | 0.7685 | 0.9251 | 0.1144 |
| OGFRL1     | 0.8010 | 1.0673 | 0.9660 | 0.8659 | 0.9251 | 0.0583 |
| LOC648164  | 0.8610 | 1.0116 | 0.9893 | 0.8383 | 0.9251 | 0.0440 |
| ZNF354B    | 0.8408 | 0.9839 | 0.9774 | 0.8982 | 0.9251 | 0.0342 |
| FAM40B     | 0.8623 | 1.0413 | 0.9444 | 0.8524 | 0.9251 | 0.0439 |
| FAM128B    | 0.9399 | 1.0694 | 1.0394 | 0.6517 | 0.9251 | 0.0952 |
| FAM10A4    | 0.8071 | 1.0940 | 1.1437 | 0.6556 | 0.9251 | 0.1165 |
| ECAT8      | 0.9219 | 0.9568 | 0.9822 | 0.8396 | 0.9251 | 0.0311 |
| TRAF3IP1   | 0.8802 | 1.0881 | 0.9338 | 0.7984 | 0.9251 | 0.0610 |
| LYL1       | 0.8072 | 1.0561 | 0.9649 | 0.8723 | 0.9251 | 0.0543 |
| ATG9A      | 0.7913 | 1.1925 | 0.9537 | 0.7629 | 0.9251 | 0.0985 |
| LOC651371  | 0.9389 | 0.9993 | 0.9208 | 0.8415 | 0.9251 | 0.0325 |
| HGF        | 0.8506 | 1.0105 | 0.9297 | 0.9098 | 0.9251 | 0.0330 |
| NAG18      | 0.8119 | 1.2145 | 0.8954 | 0.7787 | 0.9251 | 0.0995 |
| LOC440558  | 0.8389 | 1.0809 | 0.9620 | 0.8188 | 0.9251 | 0.0608 |
| LENG9      | 0.9352 | 0.9351 | 0.9911 | 0.8392 | 0.9252 | 0.0316 |
| LOC1001309 | 0.7834 | 1.0457 | 1.0036 | 0.8680 | 0.9252 | 0.0606 |
| NAP1L2     | 0.8943 | 1.0125 | 0.9340 | 0.8599 | 0.9252 | 0.0328 |
| LOC731999  | 0.9168 | 1.1503 | 0.8270 | 0.8065 | 0.9252 | 0.0788 |
| SNX11      | 0.8336 | 1.1975 | 1.0089 | 0.6608 | 0.9252 | 0.1153 |
| LOC441005  | 0.9196 | 0.9739 | 0.9634 | 0.8439 | 0.9252 | 0.0295 |
| MIR638     | 0.9560 | 0.9090 | 0.8879 | 0.9480 | 0.9252 | 0.0161 |
| LOC158257  | 0.8772 | 1.0321 | 0.9786 | 0.8129 | 0.9252 | 0.0493 |
| C12orf61   | 0.8972 | 1.1093 | 0.9052 | 0.7892 | 0.9252 | 0.0668 |
| LOC1001343 | 0.8591 | 1.1003 | 0.9202 | 0.8214 | 0.9253 | 0.0618 |
| LOC1001297 | 0.9312 | 1.0345 | 0.9685 | 0.7668 | 0.9253 | 0.0570 |
| LOC387720  | 0.8669 | 0.9993 | 0.9911 | 0.8438 | 0.9253 | 0.0407 |
| LOC645967  | 0.8867 | 1.0070 | 0.8349 | 0.9725 | 0.9253 | 0.0393 |
| GHRH       | 0.8339 | 0.9676 | 1.0362 | 0.8633 | 0.9253 | 0.0468 |
| CCDC67     | 0.9307 | 0.9477 | 0.9504 | 0.8724 | 0.9253 | 0.0182 |
| TRPC5      | 0.9433 | 1.0334 | 0.8855 | 0.8390 | 0.9253 | 0.0419 |
| CXorf36    | 0.7988 | 1.0651 | 1.0449 | 0.7924 | 0.9253 | 0.0750 |
| C16orf47   | 0.8687 | 1.0379 | 0.9425 | 0.8521 | 0.9253 | 0.0424 |
| LOC1000936 | 0.9019 | 1.0009 | 0.8648 | 0.9338 | 0.9253 | 0.0289 |
| REEP6      | 0.8524 | 1.2230 | 0.9733 | 0.6526 | 0.9253 | 0.1192 |
| SMYD5      | 0.8045 | 1.0232 | 1.0586 | 0.8149 | 0.9253 | 0.0672 |
| PPP1R3E    | 0.8852 | 1.0848 | 0.8503 | 0.8811 | 0.9253 | 0.0537 |
| LOC645504  | 0.8201 | 0.9852 | 1.0076 | 0.8886 | 0.9254 | 0.0436 |
| LOC647666  | 0.9219 | 0.9685 | 0.8899 | 0.9213 | 0.9254 | 0.0162 |
| TRAF6      | 0.8572 | 1.0779 | 0.9567 | 0.8096 | 0.9254 | 0.0594 |
| OXCT1      | 0.9109 | 1.1110 | 0.9091 | 0.7706 | 0.9254 | 0.0700 |
| LOC1001327 | 0.8135 | 1.0996 | 1.0028 | 0.7856 | 0.9254 | 0.0755 |

|            |        |        |        |        |        |        |
|------------|--------|--------|--------|--------|--------|--------|
| LOC1001305 | 1.0235 | 0.9794 | 0.9428 | 0.7559 | 0.9254 | 0.0589 |
| RBMS2P     | 0.8729 | 1.1152 | 0.8859 | 0.8276 | 0.9254 | 0.0645 |
| LOC1001330 | 0.8818 | 1.0594 | 0.8843 | 0.8761 | 0.9254 | 0.0447 |
| ATP6AP2    | 0.7601 | 1.3168 | 0.9425 | 0.6822 | 0.9254 | 0.1414 |
| LOC730323  | 0.7811 | 1.2612 | 0.9234 | 0.7360 | 0.9254 | 0.1188 |
| SLC5A6     | 0.7592 | 1.4549 | 0.8555 | 0.6323 | 0.9255 | 0.1823 |
| FAM47E     | 0.9107 | 1.1199 | 0.9186 | 0.7526 | 0.9255 | 0.0752 |
| MGC42367   | 0.9238 | 0.9873 | 0.9443 | 0.8465 | 0.9255 | 0.0295 |
| LOC642393  | 0.8807 | 1.0295 | 0.9988 | 0.7929 | 0.9255 | 0.0546 |
| PDE4C      | 0.7995 | 1.2698 | 0.9605 | 0.6723 | 0.9255 | 0.1290 |
| LOC1001343 | 0.8320 | 1.0847 | 0.9852 | 0.8001 | 0.9255 | 0.0667 |
| SLC25A5    | 0.7905 | 1.2486 | 0.9994 | 0.6637 | 0.9255 | 0.1280 |
| LOC652408  | 0.8182 | 1.0399 | 0.9904 | 0.8536 | 0.9255 | 0.0532 |
| AGTPBP1    | 0.7980 | 1.1153 | 0.9381 | 0.8507 | 0.9256 | 0.0695 |
| HIST2H4A   | 0.6533 | 1.3701 | 0.9964 | 0.6824 | 0.9256 | 0.1673 |
| ZNF414     | 0.8331 | 1.1638 | 0.8420 | 0.8634 | 0.9256 | 0.0797 |
| LOC727942  | 0.8878 | 0.9790 | 0.9678 | 0.8678 | 0.9256 | 0.0280 |
| LOC1001305 | 0.9225 | 0.9610 | 0.9033 | 0.9157 | 0.9256 | 0.0124 |
| LOC653882  | 0.8686 | 0.8739 | 1.0021 | 0.9578 | 0.9256 | 0.0327 |
| FER        | 0.7742 | 1.1348 | 0.9488 | 0.8447 | 0.9256 | 0.0784 |
| LOC1001301 | 0.9181 | 0.9621 | 0.9119 | 0.9105 | 0.9256 | 0.0123 |
| LSM14B     | 0.7918 | 1.0776 | 0.9961 | 0.8370 | 0.9256 | 0.0670 |
| XCL2       | 0.8651 | 0.9140 | 1.0074 | 0.9161 | 0.9256 | 0.0297 |
| LOC644014  | 0.9059 | 1.0443 | 0.8387 | 0.9137 | 0.9257 | 0.0430 |
| C9orf127   | 0.8465 | 1.3044 | 0.8149 | 0.7368 | 0.9257 | 0.1283 |
| LOC123688  | 0.7801 | 1.0661 | 0.9920 | 0.8646 | 0.9257 | 0.0639 |
| LOC221136  | 0.8782 | 0.8617 | 1.0231 | 0.9397 | 0.9257 | 0.0365 |
| ARNTL2     | 0.9152 | 0.9329 | 0.8983 | 0.9564 | 0.9257 | 0.0124 |
| LOC377711  | 0.9344 | 0.8999 | 0.9875 | 0.8809 | 0.9257 | 0.0234 |
| CNTNAP1    | 0.9259 | 1.0596 | 0.9124 | 0.8050 | 0.9257 | 0.0522 |
| LOC645291  | 0.8874 | 1.0484 | 0.9411 | 0.8259 | 0.9257 | 0.0472 |
| LOC441734  | 0.8613 | 0.9928 | 0.9929 | 0.8559 | 0.9257 | 0.0388 |
| HIT-40     | 0.7934 | 1.0554 | 1.0951 | 0.7590 | 0.9257 | 0.0870 |
| LOC1001300 | 0.8838 | 1.1749 | 0.9855 | 0.6588 | 0.9258 | 0.1075 |
| RAP2B      | 0.8915 | 1.0910 | 0.9296 | 0.7909 | 0.9258 | 0.0624 |
| LOC646716  | 0.8512 | 1.0067 | 0.9382 | 0.9070 | 0.9258 | 0.0324 |
| DCLRE1C    | 0.9297 | 0.9881 | 0.9413 | 0.8440 | 0.9258 | 0.0300 |
| L1CAM      | 0.8869 | 1.0347 | 0.9628 | 0.8188 | 0.9258 | 0.0467 |
| LOC642381  | 0.8407 | 1.0800 | 0.9652 | 0.8173 | 0.9258 | 0.0608 |
| C8orf37    | 0.7486 | 1.2860 | 1.0057 | 0.6629 | 0.9258 | 0.1404 |
| LOC132241  | 0.9412 | 1.0660 | 0.9217 | 0.7743 | 0.9258 | 0.0598 |
| COL4A2     | 0.8996 | 0.8963 | 0.9422 | 0.9652 | 0.9258 | 0.0168 |
| DFNB59     | 0.8251 | 1.0810 | 0.9055 | 0.8918 | 0.9258 | 0.0546 |
| LOC1001347 | 0.8593 | 1.0315 | 0.9814 | 0.8312 | 0.9258 | 0.0480 |
| LOC442232  | 0.7864 | 1.1260 | 1.1165 | 0.6745 | 0.9259 | 0.1151 |
| C12orf57   | 0.9111 | 1.1462 | 1.0128 | 0.6334 | 0.9259 | 0.1087 |



|            |        |        |        |        |        |        |
|------------|--------|--------|--------|--------|--------|--------|
| SENP1      | 0.8095 | 1.2046 | 0.9560 | 0.7333 | 0.9259 | 0.1038 |
| LOC642828  | 0.7736 | 1.0126 | 1.2288 | 0.6884 | 0.9259 | 0.1221 |
| NKX3-1     | 0.7952 | 1.0053 | 1.2884 | 0.6146 | 0.9259 | 0.1448 |
| LOC650566  | 0.7946 | 1.0352 | 1.0751 | 0.7988 | 0.9259 | 0.0750 |
| HOXD4      | 0.8687 | 1.0284 | 0.8772 | 0.9294 | 0.9259 | 0.0367 |
| AIM1       | 0.7568 | 1.1752 | 0.9647 | 0.8071 | 0.9259 | 0.0941 |
| AP3M2      | 0.8670 | 1.2128 | 0.9090 | 0.7150 | 0.9259 | 0.1043 |
| KRTAP20-3  | 0.9293 | 1.0719 | 0.8924 | 0.8102 | 0.9260 | 0.0546 |
| HP         | 0.9338 | 0.9721 | 0.8992 | 0.8988 | 0.9260 | 0.0174 |
| LOC650155  | 0.8421 | 0.9516 | 0.9957 | 0.9146 | 0.9260 | 0.0325 |
| SLC12A8    | 0.7755 | 1.1865 | 0.9815 | 0.7605 | 0.9260 | 0.1004 |
| LOC399888  | 0.8389 | 0.9769 | 1.0188 | 0.8694 | 0.9260 | 0.0428 |
| SYF2       | 0.8165 | 1.2254 | 0.9303 | 0.7319 | 0.9260 | 0.1078 |
| UBN2       | 0.8688 | 0.9880 | 0.9777 | 0.8697 | 0.9260 | 0.0329 |
| LOC1001281 | 0.8681 | 0.9852 | 0.9722 | 0.8787 | 0.9260 | 0.0306 |
| LOC1001304 | 0.8561 | 1.0773 | 0.9584 | 0.8125 | 0.9261 | 0.0590 |
| SNORD103A  | 0.8346 | 1.0606 | 0.9518 | 0.8573 | 0.9261 | 0.0515 |
| TGIF2LY    | 0.8216 | 1.0832 | 0.9200 | 0.8795 | 0.9261 | 0.0561 |
| RBM41      | 0.7587 | 1.2071 | 0.9757 | 0.7627 | 0.9261 | 0.1065 |
| LOC645663  | 0.7687 | 1.0862 | 0.9636 | 0.8859 | 0.9261 | 0.0667 |
| LRRC39     | 0.8443 | 0.9804 | 1.0111 | 0.8685 | 0.9261 | 0.0410 |
| C10orf140  | 0.7871 | 1.1117 | 0.9913 | 0.8144 | 0.9261 | 0.0767 |
| LOC643912  | 0.9937 | 0.8355 | 0.8683 | 1.0069 | 0.9261 | 0.0435 |
| KIAA1211   | 0.8869 | 0.9996 | 1.0230 | 0.7949 | 0.9261 | 0.0529 |
| GUCY2E     | 0.7912 | 0.9512 | 1.0070 | 0.9551 | 0.9261 | 0.0467 |
| LOC652400  | 0.8213 | 0.9030 | 1.1048 | 0.8754 | 0.9261 | 0.0619 |
| LOC647360  | 0.8687 | 1.0084 | 0.9899 | 0.8376 | 0.9261 | 0.0428 |
| MARK3      | 0.7547 | 1.2826 | 0.8471 | 0.8201 | 0.9261 | 0.1204 |
| SPRR2F     | 0.8587 | 1.0711 | 0.9922 | 0.7826 | 0.9261 | 0.0649 |
| ARPM1      | 0.7903 | 1.1664 | 0.8540 | 0.8939 | 0.9262 | 0.0829 |
| LOC644152  | 0.8383 | 1.0351 | 0.9782 | 0.8531 | 0.9262 | 0.0480 |
| LOC646439  | 0.7738 | 1.1629 | 0.9239 | 0.8441 | 0.9262 | 0.0847 |
| LOC1001346 | 0.8996 | 0.9960 | 0.9300 | 0.8791 | 0.9262 | 0.0255 |
| LOC1001337 | 0.8716 | 0.9976 | 1.0669 | 0.7686 | 0.9262 | 0.0663 |
| FLJ20464   | 0.8344 | 0.9899 | 0.9722 | 0.9083 | 0.9262 | 0.0353 |
| PCDHB7     | 0.8509 | 0.9757 | 0.9788 | 0.8994 | 0.9262 | 0.0311 |
| SLN        | 0.8227 | 1.0380 | 0.9338 | 0.9103 | 0.9262 | 0.0443 |
| SLFN12     | 0.9987 | 0.9744 | 0.8846 | 0.8471 | 0.9262 | 0.0360 |
| PCSK5      | 0.8344 | 1.0079 | 1.0242 | 0.8384 | 0.9262 | 0.0520 |
| LOC1001280 | 0.8306 | 1.1131 | 0.8863 | 0.8749 | 0.9262 | 0.0634 |
| LOC1001318 | 0.9166 | 0.9764 | 0.9736 | 0.8384 | 0.9263 | 0.0324 |
| KIAA0738   | 0.8276 | 0.9033 | 1.0610 | 0.9131 | 0.9263 | 0.0488 |
| HNRNPA1L2  | 0.8153 | 1.0966 | 0.9658 | 0.8274 | 0.9263 | 0.0663 |
| TNFRSF4    | 0.8670 | 0.9994 | 0.9962 | 0.8424 | 0.9263 | 0.0416 |
| RAPGEFL1   | 0.9309 | 1.0245 | 0.9255 | 0.8242 | 0.9263 | 0.0409 |
| ZNF391     | 0.9028 | 0.9884 | 0.9229 | 0.8913 | 0.9263 | 0.0217 |

|            |        |        |        |        |        |        |
|------------|--------|--------|--------|--------|--------|--------|
| AGFG1      | 0.9270 | 1.0084 | 0.9358 | 0.8341 | 0.9263 | 0.0357 |
| RN7SK      | 0.4972 | 1.2942 | 1.1719 | 0.7420 | 0.9263 | 0.1857 |
| CD164L2    | 0.9289 | 1.0085 | 0.8167 | 0.9514 | 0.9264 | 0.0402 |
| LOC147650  | 0.9425 | 0.9844 | 0.9401 | 0.8385 | 0.9264 | 0.0310 |
| FLJ33534   | 0.7340 | 1.0919 | 1.0402 | 0.8394 | 0.9264 | 0.0841 |
| CXCL13     | 1.0047 | 1.0814 | 0.7596 | 0.8599 | 0.9264 | 0.0721 |
| LOC647797  | 0.9435 | 0.9314 | 0.9344 | 0.8962 | 0.9264 | 0.0104 |
| INSRR      | 0.8713 | 0.9432 | 0.9410 | 0.9501 | 0.9264 | 0.0185 |
| C9orf45    | 0.9238 | 1.2737 | 0.7322 | 0.7759 | 0.9264 | 0.1228 |
| HTN1       | 0.9004 | 0.9191 | 0.9857 | 0.9004 | 0.9264 | 0.0203 |
| LOC728312  | 0.7957 | 1.1743 | 0.9105 | 0.8252 | 0.9264 | 0.0861 |
| LOC1001343 | 0.8496 | 1.1210 | 1.0001 | 0.7350 | 0.9264 | 0.0846 |
| P2RY1      | 0.8554 | 0.9857 | 0.9146 | 0.9500 | 0.9264 | 0.0278 |
| ZNF417     | 0.8545 | 0.9877 | 0.9638 | 0.8997 | 0.9265 | 0.0303 |
| PLD1       | 0.9160 | 1.0189 | 0.9381 | 0.8329 | 0.9265 | 0.0382 |
| C17orf69   | 0.9256 | 1.1013 | 0.9330 | 0.7460 | 0.9265 | 0.0725 |
| SLC6A13    | 0.8087 | 1.0662 | 0.9355 | 0.8955 | 0.9265 | 0.0536 |
| CCDC136    | 0.9274 | 1.2001 | 0.8580 | 0.7203 | 0.9265 | 0.1009 |
| SPACA4     | 0.8944 | 1.0025 | 0.9906 | 0.8185 | 0.9265 | 0.0434 |
| SENP3      | 0.8925 | 1.0205 | 0.9290 | 0.8639 | 0.9265 | 0.0341 |
| LOC128322  | 0.9201 | 1.0162 | 1.0033 | 0.7664 | 0.9265 | 0.0575 |
| MIR933     | 0.8116 | 1.0487 | 0.9344 | 0.9115 | 0.9265 | 0.0487 |
| TPP1       | 0.9793 | 1.1495 | 0.8283 | 0.7491 | 0.9265 | 0.0883 |
| OR4D1      | 0.8599 | 0.9914 | 0.9923 | 0.8627 | 0.9266 | 0.0377 |
| LOC1001319 | 0.9531 | 0.9075 | 0.9661 | 0.8796 | 0.9266 | 0.0201 |
| MX1        | 0.8492 | 1.1813 | 0.8648 | 0.8110 | 0.9266 | 0.0857 |
| ARID5A     | 0.9182 | 0.9934 | 0.9721 | 0.8228 | 0.9266 | 0.0381 |
| VASH1      | 0.9251 | 1.0852 | 0.8612 | 0.8350 | 0.9266 | 0.0561 |
| LOC653602  | 0.8960 | 1.0099 | 0.9803 | 0.8203 | 0.9266 | 0.0429 |
| YES1       | 1.0201 | 0.9640 | 1.0441 | 0.6784 | 0.9267 | 0.0844 |
| NFKBID     | 0.8673 | 1.0148 | 0.8897 | 0.9347 | 0.9267 | 0.0326 |
| LOC644167  | 0.8002 | 1.0585 | 0.9892 | 0.8587 | 0.9267 | 0.0591 |
| LOC442041  | 0.7945 | 1.1300 | 0.9188 | 0.8635 | 0.9267 | 0.0724 |
| LOC644690  | 0.9227 | 0.9486 | 0.9275 | 0.9080 | 0.9267 | 0.0084 |
| LOC1001341 | 0.8127 | 1.0659 | 0.9874 | 0.8408 | 0.9267 | 0.0602 |
| LNP1       | 0.9472 | 1.1145 | 0.8655 | 0.7796 | 0.9267 | 0.0713 |
| COQ5       | 0.8354 | 1.3415 | 0.8418 | 0.6883 | 0.9267 | 0.1427 |
| C10orf51   | 0.8571 | 1.0499 | 0.9697 | 0.8302 | 0.9268 | 0.0510 |
| SLC10A5    | 0.9559 | 0.9696 | 0.8886 | 0.8930 | 0.9268 | 0.0210 |
| SH3BP2     | 0.7489 | 1.0688 | 1.0714 | 0.8179 | 0.9268 | 0.0839 |
| LOC441066  | 0.9051 | 1.0704 | 0.9111 | 0.8204 | 0.9268 | 0.0522 |
| STOX2      | 0.9525 | 1.0161 | 0.8550 | 0.8834 | 0.9268 | 0.0361 |
| LOC729424  | 0.9567 | 1.0785 | 0.8555 | 0.8164 | 0.9268 | 0.0586 |
| LOC647195  | 0.6403 | 1.1169 | 1.2119 | 0.7381 | 0.9268 | 0.1400 |
| LOC647521  | 0.8140 | 1.0252 | 1.0201 | 0.8479 | 0.9268 | 0.0558 |
| SLC22A5    | 0.7975 | 1.3389 | 0.8843 | 0.6865 | 0.9268 | 0.1432 |

|            |        |        |        |        |        |        |
|------------|--------|--------|--------|--------|--------|--------|
| LOC645783  | 0.8750 | 0.9319 | 1.0335 | 0.8668 | 0.9268 | 0.0384 |
| IFT57      | 0.9548 | 0.8685 | 0.9891 | 0.8949 | 0.9268 | 0.0275 |
| LOC652671  | 0.8289 | 0.9374 | 1.1100 | 0.8311 | 0.9268 | 0.0661 |
| TSG1       | 0.7194 | 1.0343 | 1.0780 | 0.8756 | 0.9268 | 0.0817 |
| SIRT5      | 0.8299 | 1.0923 | 0.9378 | 0.8473 | 0.9268 | 0.0600 |
| LOC644735  | 0.8432 | 1.0911 | 0.9842 | 0.7888 | 0.9268 | 0.0685 |
| LOC652256  | 0.9336 | 1.0983 | 0.7911 | 0.8844 | 0.9269 | 0.0644 |
| RBM42      | 0.8741 | 1.0956 | 1.0206 | 0.7172 | 0.9269 | 0.0837 |
| CAPN13     | 0.8290 | 1.1699 | 1.0034 | 0.7052 | 0.9269 | 0.1015 |
| LOC642477  | 0.7179 | 1.3365 | 0.9336 | 0.7197 | 0.9269 | 0.1456 |
| C6orf138   | 0.8353 | 1.0061 | 0.9811 | 0.8851 | 0.9269 | 0.0402 |
| LOC390998  | 0.8428 | 1.0081 | 0.9545 | 0.9022 | 0.9269 | 0.0354 |
| CTAG1A     | 0.8307 | 1.1385 | 0.9416 | 0.7968 | 0.9269 | 0.0770 |
| LOC642280  | 0.9324 | 1.0249 | 0.8839 | 0.8664 | 0.9269 | 0.0355 |
| LOC1001282 | 0.8687 | 0.9898 | 0.9070 | 0.9421 | 0.9269 | 0.0258 |
| RPL8       | 0.7455 | 1.0651 | 1.0216 | 0.8754 | 0.9269 | 0.0728 |
| LOC402232  | 0.8206 | 1.1688 | 0.9259 | 0.7923 | 0.9269 | 0.0856 |
| PDPK1      | 0.8481 | 1.0872 | 0.9694 | 0.8030 | 0.9269 | 0.0639 |
| LOC729879  | 0.8414 | 1.0693 | 0.9413 | 0.8558 | 0.9269 | 0.0523 |
| LOC1001347 | 0.8959 | 1.0264 | 0.9718 | 0.8138 | 0.9270 | 0.0462 |
| H2BFM      | 0.8514 | 1.0347 | 1.0285 | 0.7933 | 0.9270 | 0.0616 |
| MIR567     | 0.9512 | 0.9280 | 0.9463 | 0.8824 | 0.9270 | 0.0157 |
| LOC400095  | 0.7693 | 1.1733 | 0.9396 | 0.8260 | 0.9270 | 0.0894 |
| COL27A1    | 0.8729 | 1.0237 | 0.9643 | 0.8473 | 0.9270 | 0.0409 |
| LOC652834  | 0.8572 | 0.9745 | 1.0376 | 0.8389 | 0.9270 | 0.0475 |
| LOC654103  | 0.8867 | 1.1487 | 0.9873 | 0.6855 | 0.9270 | 0.0969 |
| CENPT      | 0.8090 | 1.2097 | 0.8745 | 0.8151 | 0.9271 | 0.0954 |
| LOC649974  | 0.8676 | 1.0243 | 0.9855 | 0.8309 | 0.9271 | 0.0462 |
| KLF3       | 0.7876 | 1.0744 | 1.0523 | 0.7941 | 0.9271 | 0.0788 |
| FAM180A    | 0.8918 | 0.9057 | 1.0532 | 0.8578 | 0.9271 | 0.0432 |
| IP6K1      | 0.8619 | 1.2067 | 0.9167 | 0.7231 | 0.9271 | 0.1017 |
| BIRC2      | 0.7306 | 1.3152 | 0.9154 | 0.7472 | 0.9271 | 0.1359 |
| CXCL1      | 0.7714 | 1.0979 | 1.0260 | 0.8132 | 0.9271 | 0.0797 |
| ZNF576     | 0.7669 | 1.1084 | 0.9895 | 0.8437 | 0.9271 | 0.0760 |
| TNNI1      | 0.8337 | 0.9919 | 0.9939 | 0.8891 | 0.9271 | 0.0396 |
| FRMPD3     | 0.9513 | 1.0113 | 0.9066 | 0.8394 | 0.9272 | 0.0363 |
| LOC389676  | 0.8618 | 0.9736 | 0.9174 | 0.9558 | 0.9272 | 0.0247 |
| DNTTIP1    | 0.9208 | 1.2360 | 0.8475 | 0.7043 | 0.9272 | 0.1123 |
| PCDH15     | 0.9537 | 0.9383 | 0.9537 | 0.8629 | 0.9272 | 0.0217 |
| TMED7      | 0.7871 | 1.1527 | 1.0886 | 0.6804 | 0.9272 | 0.1145 |
| SCARNA3    | 0.8298 | 1.0539 | 0.9651 | 0.8601 | 0.9272 | 0.0512 |
| EPB41L4A   | 0.8438 | 1.1749 | 0.8089 | 0.8813 | 0.9272 | 0.0839 |
| LOC729687  | 0.8866 | 1.0653 | 0.9979 | 0.7591 | 0.9272 | 0.0671 |
| MIR526A2   | 0.8330 | 1.0360 | 1.0644 | 0.7755 | 0.9272 | 0.0722 |
| LOC652044  | 0.8612 | 0.9184 | 0.9465 | 0.9830 | 0.9273 | 0.0257 |
| MMAA       | 0.8094 | 1.1501 | 0.9464 | 0.8032 | 0.9273 | 0.0813 |

|            |        |        |        |        |        |        |
|------------|--------|--------|--------|--------|--------|--------|
| LOC644193  | 0.8283 | 0.9406 | 1.0136 | 0.9267 | 0.9273 | 0.0381 |
| LOC1001282 | 0.8701 | 1.1067 | 0.9089 | 0.8235 | 0.9273 | 0.0623 |
| LOC647083  | 0.8842 | 0.9921 | 0.9198 | 0.9132 | 0.9273 | 0.0229 |
| CHMP1A     | 0.8851 | 1.3127 | 0.8132 | 0.6982 | 0.9273 | 0.1341 |
| FEM1B      | 0.7769 | 1.1871 | 0.9578 | 0.7875 | 0.9273 | 0.0960 |
| SV2A       | 0.9415 | 0.9295 | 0.9499 | 0.8885 | 0.9273 | 0.0136 |
| MOBKL1A    | 0.8483 | 1.0612 | 0.9577 | 0.8422 | 0.9273 | 0.0519 |
| LOC653983  | 0.8658 | 0.9962 | 1.0241 | 0.8234 | 0.9274 | 0.0489 |
| MDP1       | 0.8860 | 1.0825 | 0.9795 | 0.7614 | 0.9274 | 0.0683 |
| SLC38A9    | 0.7840 | 1.1870 | 0.9682 | 0.7703 | 0.9274 | 0.0976 |
| LOC649926  | 0.8957 | 0.9703 | 1.0362 | 0.8072 | 0.9274 | 0.0493 |
| PIGB       | 0.9062 | 1.2061 | 0.8394 | 0.7578 | 0.9274 | 0.0977 |
| LOC728484  | 0.7390 | 1.0710 | 1.2405 | 0.6591 | 0.9274 | 0.1373 |
| SNORA81    | 0.8675 | 1.0796 | 0.9724 | 0.7902 | 0.9274 | 0.0630 |
| LOC1001290 | 0.8978 | 1.0436 | 0.8746 | 0.8936 | 0.9274 | 0.0391 |
| CLU        | 0.8718 | 1.0208 | 0.9513 | 0.8658 | 0.9274 | 0.0367 |
| SYNGR2     | 0.8944 | 1.0697 | 0.9661 | 0.7795 | 0.9274 | 0.0610 |
| C6orf188   | 0.8185 | 1.0100 | 1.0315 | 0.8499 | 0.9275 | 0.0544 |
| AHSA1      | 0.7085 | 1.4397 | 0.9449 | 0.6168 | 0.9275 | 0.1842 |
| LOC652577  | 0.8799 | 0.9635 | 1.0181 | 0.8485 | 0.9275 | 0.0387 |
| LOC731827  | 0.8432 | 0.9877 | 0.9890 | 0.8901 | 0.9275 | 0.0364 |
| FAM40A     | 0.8469 | 1.0945 | 0.9608 | 0.8078 | 0.9275 | 0.0644 |
| QSOX1      | 0.8572 | 1.1959 | 0.9419 | 0.7152 | 0.9275 | 0.1009 |
| LOC646090  | 0.9339 | 0.8883 | 0.9703 | 0.9177 | 0.9276 | 0.0171 |
| LOC645799  | 0.9428 | 1.0549 | 0.8782 | 0.8344 | 0.9276 | 0.0479 |
| FAM46D     | 0.6679 | 1.2283 | 0.9458 | 0.8683 | 0.9276 | 0.1161 |
| LOC654133  | 0.8266 | 0.9538 | 1.0102 | 0.9198 | 0.9276 | 0.0385 |
| ELMOD1     | 0.8897 | 0.9651 | 1.0135 | 0.8422 | 0.9276 | 0.0382 |
| FAM120A    | 0.8571 | 1.1323 | 0.9861 | 0.7350 | 0.9276 | 0.0854 |
| LOC652513  | 0.7847 | 1.0309 | 0.9645 | 0.9303 | 0.9276 | 0.0520 |
| PUS3       | 0.7006 | 1.2229 | 1.0805 | 0.7065 | 0.9276 | 0.1326 |
| TUBA4      | 0.8786 | 0.9654 | 0.9173 | 0.9493 | 0.9276 | 0.0192 |
| LOC1001286 | 0.8565 | 0.9704 | 1.0148 | 0.8689 | 0.9276 | 0.0387 |
| LOC645620  | 0.9032 | 1.0915 | 0.8513 | 0.8648 | 0.9277 | 0.0557 |
| LOC646187  | 0.8314 | 1.0180 | 0.9882 | 0.8731 | 0.9277 | 0.0448 |
| TAF1A      | 0.8704 | 1.0476 | 0.9734 | 0.8193 | 0.9277 | 0.0512 |
| LOC652869  | 0.8666 | 0.9032 | 0.9739 | 0.9670 | 0.9277 | 0.0258 |
| LGR4       | 0.8571 | 1.1339 | 0.9336 | 0.7861 | 0.9277 | 0.0750 |
| KIF27      | 0.8965 | 1.0663 | 0.8963 | 0.8517 | 0.9277 | 0.0474 |
| PIH1D2     | 0.8063 | 1.0850 | 0.9959 | 0.8237 | 0.9277 | 0.0677 |
| LOC653171  | 0.8858 | 1.2183 | 0.8680 | 0.7388 | 0.9277 | 0.1022 |
| TDRKH      | 0.9850 | 0.9159 | 1.0117 | 0.7984 | 0.9278 | 0.0476 |
| LOC647054  | 1.0018 | 0.9155 | 0.9193 | 0.8744 | 0.9278 | 0.0267 |
| BLZF1      | 0.7787 | 1.0567 | 1.1449 | 0.7308 | 0.9278 | 0.1020 |
| CTSC       | 0.8764 | 1.0953 | 0.9579 | 0.7815 | 0.9278 | 0.0665 |
| CORO1B     | 0.8609 | 1.1934 | 0.9081 | 0.7487 | 0.9278 | 0.0946 |

|            |        |        |        |        |        |        |
|------------|--------|--------|--------|--------|--------|--------|
| LOC728344  | 0.8345 | 1.1095 | 0.9597 | 0.8074 | 0.9278 | 0.0691 |
| LOC644500  | 0.8355 | 1.0225 | 0.9832 | 0.8699 | 0.9278 | 0.0446 |
| FLJ26056   | 0.7963 | 1.0255 | 0.9677 | 0.9217 | 0.9278 | 0.0487 |
| KIAA1967   | 0.9084 | 1.1637 | 0.9060 | 0.7332 | 0.9278 | 0.0887 |
| LOC649057  | 0.8794 | 1.0352 | 0.9258 | 0.8708 | 0.9278 | 0.0378 |
| LY86       | 0.9243 | 1.0106 | 0.9764 | 0.8000 | 0.9278 | 0.0462 |
| MARCKSL1   | 0.7399 | 1.4768 | 0.7664 | 0.7282 | 0.9278 | 0.1832 |
| LOC642644  | 0.8822 | 0.9889 | 0.9481 | 0.8921 | 0.9278 | 0.0250 |
| FLJ44054   | 0.9267 | 0.9734 | 1.1015 | 0.7098 | 0.9279 | 0.0815 |
| LTBP4      | 0.8188 | 1.1765 | 0.9069 | 0.8092 | 0.9279 | 0.0857 |
| LOC644396  | 0.9490 | 0.9527 | 0.8948 | 0.9150 | 0.9279 | 0.0139 |
| LOC728452  | 0.9642 | 1.0757 | 0.8313 | 0.8403 | 0.9279 | 0.0578 |
| LOC644088  | 0.8052 | 0.9812 | 0.9811 | 0.9441 | 0.9279 | 0.0418 |
| NCRNA00115 | 0.9736 | 0.9535 | 0.9143 | 0.8701 | 0.9279 | 0.0229 |
| C21orf126  | 0.7787 | 0.9693 | 1.0167 | 0.9468 | 0.9279 | 0.0518 |
| FOXO6      | 0.8847 | 1.0121 | 0.9777 | 0.8370 | 0.9279 | 0.0405 |
| DPPA2      | 0.8650 | 1.0592 | 0.9093 | 0.8781 | 0.9279 | 0.0447 |
| LOC1001340 | 0.8929 | 1.0730 | 0.9252 | 0.8206 | 0.9279 | 0.0531 |
| LOC652883  | 0.8980 | 1.0519 | 0.9378 | 0.8240 | 0.9279 | 0.0476 |
| SIL1       | 0.8242 | 1.2651 | 0.8807 | 0.7417 | 0.9279 | 0.1160 |
| PFN4       | 0.9391 | 0.9461 | 0.9667 | 0.8599 | 0.9279 | 0.0234 |
| LOC729012  | 0.7712 | 1.0576 | 1.0347 | 0.8482 | 0.9279 | 0.0702 |
| LOC644039  | 0.6988 | 1.2248 | 1.1954 | 0.5927 | 0.9279 | 0.1645 |
| PRDM7      | 0.9349 | 0.9450 | 0.9328 | 0.8992 | 0.9279 | 0.0100 |
| LOC1001291 | 0.8320 | 0.9338 | 1.0708 | 0.8752 | 0.9280 | 0.0520 |
| ZMAT5      | 0.8574 | 1.2300 | 0.8649 | 0.7595 | 0.9280 | 0.1035 |
| LOC1001335 | 0.7709 | 1.0144 | 1.0914 | 0.8352 | 0.9280 | 0.0750 |
| OGFOD1     | 0.7370 | 1.3027 | 0.9591 | 0.7131 | 0.9280 | 0.1366 |
| CAMLG      | 0.8397 | 1.2980 | 0.9862 | 0.5880 | 0.9280 | 0.1482 |
| TBC1D19    | 0.8505 | 1.1806 | 0.8838 | 0.7970 | 0.9280 | 0.0861 |
| LOC653100  | 0.9071 | 0.9949 | 0.9200 | 0.8900 | 0.9280 | 0.0231 |
| KIR2DS2    | 0.7756 | 0.9435 | 1.2006 | 0.7922 | 0.9280 | 0.0984 |
| ARHGEF4    | 0.9056 | 1.0106 | 0.9238 | 0.8721 | 0.9280 | 0.0295 |
| CD82       | 0.8256 | 1.2593 | 0.9091 | 0.7180 | 0.9280 | 0.1172 |
| PNPLA4     | 0.8478 | 0.9434 | 1.0721 | 0.8489 | 0.9280 | 0.0530 |
| ANKRD27    | 0.8820 | 1.0238 | 1.0551 | 0.7513 | 0.9280 | 0.0699 |
| ANKZF1     | 0.8934 | 1.1384 | 0.9249 | 0.7554 | 0.9280 | 0.0792 |
| UBE3B      | 0.9271 | 1.0368 | 0.8982 | 0.8501 | 0.9281 | 0.0396 |
| SETD1B     | 0.9158 | 1.0134 | 0.9328 | 0.8502 | 0.9281 | 0.0336 |
| LOC256374  | 0.6790 | 1.0661 | 1.0635 | 0.9037 | 0.9281 | 0.0913 |
| LOC651556  | 0.8459 | 1.0403 | 0.9503 | 0.8759 | 0.9281 | 0.0434 |
| IQCF3      | 0.9132 | 0.9858 | 0.9483 | 0.8652 | 0.9281 | 0.0257 |
| ANKLE1     | 0.9087 | 1.0313 | 0.9708 | 0.8017 | 0.9281 | 0.0490 |
| RPL13AP3   | 0.9619 | 0.9957 | 0.8708 | 0.8841 | 0.9281 | 0.0302 |
| KIAA1279   | 0.8344 | 1.1698 | 1.0178 | 0.6905 | 0.9281 | 0.1048 |
| LOC1001339 | 0.6383 | 0.9251 | 1.1786 | 0.9707 | 0.9281 | 0.1113 |

|            |        |        |        |        |        |        |
|------------|--------|--------|--------|--------|--------|--------|
| LOC649179  | 0.9092 | 1.0285 | 0.8712 | 0.9037 | 0.9281 | 0.0345 |
| PPAN-P2RY1 | 0.8545 | 1.0079 | 0.9361 | 0.9142 | 0.9282 | 0.0317 |
| LOC401717  | 0.8510 | 0.9549 | 1.1120 | 0.7947 | 0.9282 | 0.0697 |
| FLJ44006   | 0.8726 | 0.9972 | 0.9851 | 0.8578 | 0.9282 | 0.0366 |
| LOC1001323 | 0.9006 | 1.1022 | 0.9067 | 0.8032 | 0.9282 | 0.0627 |
| LOC654002  | 0.9371 | 1.0452 | 0.9664 | 0.7640 | 0.9282 | 0.0593 |
| LOC645481  | 0.8280 | 1.0419 | 0.9321 | 0.9107 | 0.9282 | 0.0441 |
| FBXO42     | 0.9987 | 1.0709 | 1.0346 | 0.6085 | 0.9282 | 0.1076 |
| OR14J1     | 0.8889 | 1.0041 | 0.8761 | 0.9437 | 0.9282 | 0.0292 |
| CASP7      | 0.7679 | 1.1909 | 1.0272 | 0.7269 | 0.9282 | 0.1099 |
| LOC651403  | 0.9026 | 0.9071 | 0.9546 | 0.9485 | 0.9282 | 0.0136 |
| MON1A      | 0.8742 | 1.1988 | 0.8344 | 0.8056 | 0.9282 | 0.0913 |
| C10orf120  | 0.9035 | 1.0407 | 0.9776 | 0.7912 | 0.9282 | 0.0536 |
| C12orf77   | 0.7522 | 0.9919 | 1.1074 | 0.8616 | 0.9283 | 0.0772 |
| MYH2       | 0.9195 | 0.9548 | 0.9515 | 0.8872 | 0.9283 | 0.0158 |
| C1orf111   | 0.8238 | 1.0466 | 0.9402 | 0.9025 | 0.9283 | 0.0463 |
| SLC16A9    | 0.8860 | 1.1897 | 0.8839 | 0.7535 | 0.9283 | 0.0925 |
| GIMAP2     | 0.8941 | 1.0308 | 1.0013 | 0.7871 | 0.9283 | 0.0555 |
| REXO1      | 0.9095 | 1.0048 | 0.9163 | 0.8828 | 0.9284 | 0.0265 |
| CCDC4      | 0.8683 | 1.0291 | 0.9470 | 0.8691 | 0.9284 | 0.0383 |
| LOC644196  | 0.8664 | 0.9570 | 0.9932 | 0.8968 | 0.9284 | 0.0286 |
| MOG        | 0.8374 | 1.2651 | 0.8895 | 0.7215 | 0.9284 | 0.1176 |
| KAT5       | 0.9077 | 0.9748 | 1.0539 | 0.7771 | 0.9284 | 0.0586 |
| LOC342541  | 0.9962 | 0.8798 | 0.9283 | 0.9092 | 0.9284 | 0.0247 |
| LOC1001330 | 0.8981 | 0.8941 | 0.9582 | 0.9631 | 0.9284 | 0.0187 |
| DUSP26     | 0.9032 | 0.9403 | 1.0185 | 0.8517 | 0.9284 | 0.0351 |
| RNF113B    | 0.9231 | 1.1508 | 0.8087 | 0.8312 | 0.9284 | 0.0781 |
| AMPH       | 0.9096 | 1.0362 | 0.9128 | 0.8551 | 0.9284 | 0.0383 |
| LOC641710  | 0.7921 | 1.0431 | 0.9362 | 0.9425 | 0.9285 | 0.0516 |
| LOC644116  | 0.9244 | 1.1118 | 0.9270 | 0.7507 | 0.9285 | 0.0737 |
| IL18       | 0.7535 | 1.2648 | 0.9385 | 0.7571 | 0.9285 | 0.1201 |
| OR2T29     | 0.7849 | 1.0059 | 1.0932 | 0.8300 | 0.9285 | 0.0727 |
| DNAJB6     | 0.7181 | 1.2653 | 0.9467 | 0.7839 | 0.9285 | 0.1221 |
| LOC653193  | 0.9008 | 0.9940 | 0.9682 | 0.8510 | 0.9285 | 0.0325 |
| SLC35B1    | 0.7168 | 1.4338 | 0.8387 | 0.7248 | 0.9285 | 0.1707 |
| LOC440353  | 0.8938 | 1.4185 | 0.6512 | 0.7507 | 0.9285 | 0.1708 |
| ITGA10     | 0.9424 | 1.0404 | 0.7993 | 0.9321 | 0.9286 | 0.0495 |
| SEC23B     | 0.8027 | 1.1997 | 1.0005 | 0.7114 | 0.9286 | 0.1087 |
| DRG2       | 1.0385 | 1.0205 | 0.9345 | 0.7208 | 0.9286 | 0.0729 |
| ZNF32      | 0.8214 | 1.3340 | 0.8565 | 0.7024 | 0.9286 | 0.1391 |
| LOC729028  | 0.9861 | 0.8748 | 1.0274 | 0.8259 | 0.9286 | 0.0470 |
| LEMD1      | 0.8089 | 1.0956 | 0.9533 | 0.8566 | 0.9286 | 0.0633 |
| LOC651291  | 0.7910 | 1.0654 | 0.9941 | 0.8639 | 0.9286 | 0.0620 |
| PRR18      | 0.8500 | 1.0131 | 0.9833 | 0.8679 | 0.9286 | 0.0408 |
| SYT8       | 0.8606 | 0.9544 | 0.9936 | 0.9058 | 0.9286 | 0.0289 |
| REPS2      | 0.7352 | 1.2479 | 0.9551 | 0.7762 | 0.9286 | 0.1167 |

|            |        |        |        |        |        |        |
|------------|--------|--------|--------|--------|--------|--------|
| ARRDC4     | 0.8372 | 1.1504 | 0.9304 | 0.7965 | 0.9286 | 0.0791 |
| FOXC2      | 0.8694 | 1.0828 | 0.9291 | 0.8331 | 0.9286 | 0.0551 |
| LOC441377  | 0.7432 | 0.9027 | 1.4636 | 0.6050 | 0.9286 | 0.1884 |
| LOC1001327 | 0.8305 | 0.9544 | 1.0369 | 0.8928 | 0.9286 | 0.0441 |
| LOC1001337 | 0.8777 | 1.0459 | 0.8169 | 0.9741 | 0.9286 | 0.0507 |
| PTH2       | 0.8061 | 1.0602 | 0.9306 | 0.9176 | 0.9286 | 0.0520 |
| ESCO2      | 0.8266 | 0.9724 | 1.0254 | 0.8904 | 0.9287 | 0.0439 |
| MIR551A    | 0.9675 | 0.8675 | 0.9828 | 0.8969 | 0.9287 | 0.0277 |
| SMAD2      | 0.9075 | 1.0258 | 0.9162 | 0.8654 | 0.9287 | 0.0342 |
| DDX31      | 0.8050 | 1.1813 | 0.9360 | 0.7927 | 0.9287 | 0.0902 |
| JMJD5      | 0.9724 | 0.9767 | 0.9269 | 0.8389 | 0.9287 | 0.0320 |
| FAM90A10   | 0.9194 | 1.0462 | 0.9178 | 0.8317 | 0.9288 | 0.0442 |
| MAP3K12    | 0.7869 | 1.1339 | 0.8828 | 0.9115 | 0.9288 | 0.0734 |
| DNAH8      | 0.8829 | 1.0782 | 0.8595 | 0.8945 | 0.9288 | 0.0503 |
| LOC651483  | 0.8300 | 1.0250 | 1.0129 | 0.8473 | 0.9288 | 0.0522 |
| ZFATAS     | 0.8560 | 0.9911 | 1.0495 | 0.8186 | 0.9288 | 0.0547 |
| ECAT1      | 0.9164 | 1.0491 | 1.0046 | 0.7453 | 0.9288 | 0.0671 |
| FOXQ1      | 0.8816 | 0.9481 | 0.9506 | 0.9350 | 0.9288 | 0.0161 |
| LOC643960  | 0.8013 | 1.0857 | 0.9900 | 0.8384 | 0.9288 | 0.0663 |
| TMEM191C   | 0.8550 | 1.0131 | 0.9574 | 0.8899 | 0.9288 | 0.0352 |
| CCDC7      | 0.8990 | 1.0451 | 0.8781 | 0.8932 | 0.9289 | 0.0390 |
| NARFL      | 0.9756 | 1.1086 | 0.9157 | 0.7156 | 0.9289 | 0.0817 |
| PIKFYVE    | 0.8765 | 1.0793 | 0.9642 | 0.7955 | 0.9289 | 0.0608 |
| LOC1001316 | 0.8973 | 1.0456 | 0.9676 | 0.8051 | 0.9289 | 0.0512 |
| KIAA1128   | 0.8625 | 1.1391 | 0.9534 | 0.7606 | 0.9289 | 0.0804 |
| LOC729513  | 0.8498 | 0.9977 | 0.9911 | 0.8770 | 0.9289 | 0.0383 |
| LOC646649  | 0.8646 | 1.0621 | 0.8653 | 0.9236 | 0.9289 | 0.0465 |
| LOC441759  | 0.8749 | 0.8209 | 1.1305 | 0.8896 | 0.9290 | 0.0688 |
| KCNS1      | 0.9661 | 0.9486 | 0.9465 | 0.8547 | 0.9290 | 0.0251 |
| ATP2B4     | 0.8414 | 1.2508 | 0.8532 | 0.7706 | 0.9290 | 0.1088 |
| FAM118A    | 0.9727 | 0.8945 | 0.8964 | 0.9524 | 0.9290 | 0.0198 |
| PCDHB6     | 0.9292 | 0.9701 | 0.9206 | 0.8960 | 0.9290 | 0.0154 |
| BFSP1      | 0.9044 | 0.9969 | 0.9246 | 0.8901 | 0.9290 | 0.0237 |
| HLA-DPA1   | 0.8612 | 0.9871 | 1.0452 | 0.8225 | 0.9290 | 0.0523 |
| LOC391556  | 0.8206 | 1.0340 | 0.9474 | 0.9140 | 0.9290 | 0.0441 |
| LOC1001315 | 0.7984 | 1.0323 | 0.9448 | 0.9405 | 0.9290 | 0.0484 |
| LOC1001301 | 0.9047 | 0.9169 | 0.9515 | 0.9430 | 0.9290 | 0.0110 |
| RBMY1J     | 0.8853 | 1.0098 | 0.9432 | 0.8779 | 0.9290 | 0.0306 |
| LOC644166  | 0.8714 | 0.9901 | 1.0528 | 0.8020 | 0.9290 | 0.0567 |
| C1QTNF9B   | 0.9142 | 1.0883 | 0.9135 | 0.8002 | 0.9290 | 0.0595 |
| LOC652153  | 0.8347 | 1.0771 | 0.9579 | 0.8466 | 0.9291 | 0.0566 |
| GZMH       | 0.8009 | 1.0307 | 1.0156 | 0.8692 | 0.9291 | 0.0561 |
| C8orf13    | 0.8294 | 0.9369 | 0.9569 | 0.9931 | 0.9291 | 0.0352 |
| B3GALNT1   | 0.8763 | 0.9499 | 1.0241 | 0.8660 | 0.9291 | 0.0368 |
| NCAPH      | 0.8491 | 1.0957 | 0.9120 | 0.8596 | 0.9291 | 0.0572 |
| LOC731950  | 0.7414 | 1.3228 | 0.9004 | 0.7519 | 0.9291 | 0.1362 |

|            |        |        |        |        |        |        |
|------------|--------|--------|--------|--------|--------|--------|
| MRPL41     | 0.7439 | 1.3151 | 0.8915 | 0.7662 | 0.9291 | 0.1327 |
| LOC1001315 | 0.8420 | 1.0174 | 0.8932 | 0.9640 | 0.9291 | 0.0386 |
| TASP1      | 0.9567 | 1.1545 | 0.8188 | 0.7865 | 0.9291 | 0.0837 |
| ARL16      | 0.8139 | 1.2498 | 0.9553 | 0.6976 | 0.9292 | 0.1192 |
| IDI2       | 0.9525 | 0.9357 | 0.9730 | 0.8554 | 0.9292 | 0.0257 |
| LOC728288  | 0.9241 | 1.0078 | 0.9167 | 0.8681 | 0.9292 | 0.0290 |
| FAM132B    | 0.8597 | 0.9741 | 1.0576 | 0.8253 | 0.9292 | 0.0533 |
| LOC650076  | 0.9573 | 0.9915 | 0.9501 | 0.8179 | 0.9292 | 0.0382 |
| C2orf51    | 0.9989 | 0.9963 | 0.9500 | 0.7718 | 0.9292 | 0.0537 |
| JUNB       | 0.8417 | 1.1534 | 0.9005 | 0.8214 | 0.9292 | 0.0766 |
| LOC651131  | 0.9012 | 0.9381 | 0.9457 | 0.9319 | 0.9292 | 0.0098 |
| MYCBPAP    | 0.9901 | 0.9770 | 0.8861 | 0.8639 | 0.9292 | 0.0318 |
| LOC644363  | 0.7879 | 1.2450 | 1.0231 | 0.6609 | 0.9292 | 0.1292 |
| LOC648496  | 0.9890 | 0.9651 | 0.9792 | 0.7838 | 0.9293 | 0.0487 |
| PLA2G2F    | 0.9016 | 1.1063 | 0.9679 | 0.7412 | 0.9293 | 0.0758 |
| RFPL4B     | 0.8931 | 1.0088 | 0.9799 | 0.8354 | 0.9293 | 0.0398 |
| MIR511-2   | 0.8386 | 0.9981 | 1.0525 | 0.8279 | 0.9293 | 0.0566 |
| PDIA3P     | 0.7611 | 1.1486 | 1.1346 | 0.6729 | 0.9293 | 0.1239 |
| GFOD2      | 0.8451 | 1.2111 | 0.9604 | 0.7006 | 0.9293 | 0.1079 |
| TEKT1      | 0.8672 | 1.0144 | 0.8934 | 0.9423 | 0.9293 | 0.0324 |
| PARP14     | 0.8576 | 1.1375 | 0.9460 | 0.7763 | 0.9293 | 0.0776 |
| IRF8       | 0.8283 | 1.0780 | 0.9827 | 0.8284 | 0.9293 | 0.0615 |
| BRAF       | 0.7360 | 1.2280 | 0.9389 | 0.8145 | 0.9294 | 0.1080 |
| CCDC46     | 0.8853 | 1.0523 | 0.9322 | 0.8476 | 0.9294 | 0.0445 |
| RNF122     | 0.8466 | 1.1857 | 0.9730 | 0.7121 | 0.9294 | 0.1007 |
| CRLS1      | 0.7147 | 1.3075 | 0.9449 | 0.7504 | 0.9294 | 0.1358 |
| MIR1179    | 0.8156 | 1.0269 | 0.9375 | 0.9375 | 0.9294 | 0.0434 |
| DGUOK      | 0.7196 | 1.2842 | 0.9868 | 0.7269 | 0.9294 | 0.1336 |
| SR140      | 0.6500 | 1.4446 | 0.7991 | 0.8238 | 0.9294 | 0.1760 |
| ZMYM4      | 0.8012 | 1.1973 | 0.9859 | 0.7331 | 0.9294 | 0.1040 |
| MYBBP1A    | 0.8150 | 0.9904 | 1.0838 | 0.8284 | 0.9294 | 0.0651 |
| ARHGEF12   | 0.9022 | 1.0485 | 0.9366 | 0.8303 | 0.9294 | 0.0455 |
| MGC3771    | 0.8786 | 1.0720 | 0.9640 | 0.8030 | 0.9294 | 0.0578 |
| LOC1001281 | 0.9057 | 0.9964 | 0.9478 | 0.8678 | 0.9294 | 0.0277 |
| XRN1       | 0.9240 | 1.0845 | 0.9132 | 0.7961 | 0.9294 | 0.0592 |
| STGC3      | 0.9066 | 0.9391 | 0.9969 | 0.8752 | 0.9294 | 0.0260 |
| ZNF285B    | 0.8420 | 1.0992 | 0.9151 | 0.8615 | 0.9294 | 0.0587 |
| LOC643273  | 0.9344 | 1.1405 | 0.8514 | 0.7915 | 0.9294 | 0.0762 |
| FTSJD1     | 0.8501 | 1.1633 | 0.9870 | 0.7174 | 0.9295 | 0.0954 |
| LOC650919  | 0.8375 | 0.9595 | 1.0442 | 0.8766 | 0.9295 | 0.0459 |
| HGD        | 0.8141 | 1.1217 | 0.9214 | 0.8606 | 0.9295 | 0.0678 |
| PODNL1     | 0.8737 | 0.9871 | 0.9790 | 0.8781 | 0.9295 | 0.0310 |
| AIRE       | 0.7122 | 1.1917 | 1.0992 | 0.7148 | 0.9295 | 0.1261 |
| PHEX       | 0.8929 | 0.9072 | 1.0288 | 0.8889 | 0.9295 | 0.0334 |
| LOC653809  | 0.9052 | 0.9407 | 1.0102 | 0.8618 | 0.9295 | 0.0314 |
| LOC643339  | 0.8821 | 1.2582 | 0.7970 | 0.7806 | 0.9295 | 0.1118 |



|            |        |        |        |        |        |        |
|------------|--------|--------|--------|--------|--------|--------|
| GIF        | 0.7671 | 1.0081 | 1.0232 | 0.9194 | 0.9295 | 0.0588 |
| FEZ1       | 0.8439 | 1.0630 | 0.9852 | 0.8259 | 0.9295 | 0.0570 |
| DND1       | 0.8998 | 1.0147 | 0.9963 | 0.8072 | 0.9295 | 0.0479 |
| APBA2BP    | 0.8802 | 1.0998 | 0.9931 | 0.7451 | 0.9295 | 0.0761 |
| CACNA2D4   | 0.9187 | 1.0145 | 0.9405 | 0.8444 | 0.9295 | 0.0350 |
| POLR1D     | 0.7433 | 1.3406 | 0.9045 | 0.7297 | 0.9296 | 0.1427 |
| TMBIM6     | 0.8930 | 1.2814 | 0.9122 | 0.6315 | 0.9296 | 0.1336 |
| ZIC5       | 0.7759 | 0.9932 | 1.0555 | 0.8936 | 0.9296 | 0.0611 |
| FLJ44048   | 0.9049 | 0.9579 | 1.0130 | 0.8425 | 0.9296 | 0.0364 |
| C1orf192   | 0.7856 | 0.9680 | 1.0881 | 0.8766 | 0.9296 | 0.0646 |
| KIAA1345   | 0.7330 | 1.2133 | 0.9984 | 0.7737 | 0.9296 | 0.1111 |
| ZNF177     | 0.7709 | 1.1769 | 0.9032 | 0.8675 | 0.9296 | 0.0870 |
| DNAH6      | 0.9095 | 1.0580 | 0.8371 | 0.9139 | 0.9296 | 0.0463 |
| PARP8      | 0.8796 | 1.1324 | 0.9754 | 0.7311 | 0.9296 | 0.0842 |
| TFAP4      | 0.8116 | 1.0725 | 0.9691 | 0.8653 | 0.9296 | 0.0578 |
| MGC27345   | 0.9413 | 1.0864 | 0.8733 | 0.8175 | 0.9296 | 0.0581 |
| IL25       | 0.8783 | 1.0123 | 1.0845 | 0.7434 | 0.9296 | 0.0754 |
| LOC650162  | 0.8543 | 0.9973 | 0.9167 | 0.9502 | 0.9296 | 0.0301 |
| LOC731542  | 0.7984 | 1.2856 | 0.9006 | 0.7340 | 0.9296 | 0.1235 |
| FLJ46906   | 0.8203 | 1.1035 | 0.8729 | 0.9219 | 0.9297 | 0.0616 |
| KRT6C      | 0.9042 | 0.9991 | 0.9831 | 0.8322 | 0.9297 | 0.0385 |
| FLJ20850   | 0.9275 | 0.9212 | 1.0706 | 0.7994 | 0.9297 | 0.0555 |
| TOP2B      | 0.7643 | 1.3164 | 0.8773 | 0.7607 | 0.9297 | 0.1317 |
| ANKS3      | 0.8444 | 1.1243 | 0.8525 | 0.8976 | 0.9297 | 0.0659 |
| MXRA8      | 0.9309 | 1.0681 | 0.9266 | 0.7932 | 0.9297 | 0.0561 |
| PLSCR1     | 0.9126 | 1.0029 | 0.8672 | 0.9363 | 0.9297 | 0.0283 |
| LOC1001312 | 0.9350 | 0.9649 | 0.9639 | 0.8551 | 0.9297 | 0.0258 |
| LOC728326  | 0.8561 | 1.0384 | 0.9015 | 0.9229 | 0.9297 | 0.0388 |
| DNMBP      | 0.9018 | 1.0385 | 0.8386 | 0.9402 | 0.9298 | 0.0419 |
| DQX1       | 0.8464 | 1.0032 | 1.0223 | 0.8473 | 0.9298 | 0.0480 |
| LOC645966  | 0.9082 | 1.0524 | 0.9309 | 0.8277 | 0.9298 | 0.0465 |
| ZNF227     | 0.8625 | 1.0220 | 1.0623 | 0.7725 | 0.9298 | 0.0679 |
| LOC650611  | 0.9508 | 0.9422 | 0.9198 | 0.9064 | 0.9298 | 0.0102 |
| LOC648218  | 0.9347 | 0.9760 | 0.8605 | 0.9480 | 0.9298 | 0.0246 |
| GTPBP8     | 0.7225 | 1.3099 | 0.9783 | 0.7086 | 0.9298 | 0.1410 |
| USP48      | 0.8004 | 1.1759 | 0.9231 | 0.8200 | 0.9298 | 0.0863 |
| LOC649841  | 0.9445 | 0.9660 | 0.9536 | 0.8553 | 0.9298 | 0.0252 |
| PIP5K3     | 0.8434 | 1.0545 | 0.8961 | 0.9255 | 0.9299 | 0.0449 |
| MPP1       | 0.7469 | 1.0993 | 0.9989 | 0.8744 | 0.9299 | 0.0764 |
| MKS1       | 0.8357 | 1.0874 | 0.9133 | 0.8831 | 0.9299 | 0.0549 |
| OR1L8      | 1.0865 | 0.9206 | 0.9472 | 0.7652 | 0.9299 | 0.0658 |
| LOC1001291 | 0.8476 | 1.1209 | 0.8578 | 0.8933 | 0.9299 | 0.0644 |
| LOC642966  | 0.7455 | 1.1584 | 1.0008 | 0.8149 | 0.9299 | 0.0933 |
| LOC728558  | 0.8620 | 1.1386 | 0.8795 | 0.8394 | 0.9299 | 0.0701 |
| LOC645355  | 0.8571 | 1.0994 | 0.8435 | 0.9196 | 0.9299 | 0.0589 |
| FKBP1B     | 0.7049 | 0.9730 | 1.1152 | 0.9266 | 0.9299 | 0.0851 |

|            |        |        |        |        |        |        |
|------------|--------|--------|--------|--------|--------|--------|
| LOC441135  | 0.9072 | 1.1110 | 0.8457 | 0.8559 | 0.9299 | 0.0618 |
| AGAP7      | 0.8338 | 1.0047 | 0.9694 | 0.9119 | 0.9299 | 0.0373 |
| LOC642711  | 0.9788 | 0.9627 | 1.0289 | 0.7495 | 0.9300 | 0.0618 |
| TAS2R14    | 0.8726 | 1.0031 | 0.9189 | 0.9252 | 0.9300 | 0.0271 |
| TCF4       | 0.9301 | 1.0858 | 0.8848 | 0.8191 | 0.9300 | 0.0567 |
| LOC645431  | 0.8141 | 1.0092 | 0.9699 | 0.9267 | 0.9300 | 0.0421 |
| MGC12538   | 0.9686 | 1.0078 | 0.9375 | 0.8061 | 0.9300 | 0.0437 |
| PTPN6      | 0.8176 | 1.2805 | 0.8171 | 0.8048 | 0.9300 | 0.1169 |
| SOLH       | 0.9359 | 1.0538 | 0.8550 | 0.8754 | 0.9300 | 0.0447 |
| LOC728353  | 0.9422 | 0.8919 | 1.0365 | 0.8495 | 0.9300 | 0.0402 |
| MGST1      | 0.7548 | 1.2956 | 0.9681 | 0.7015 | 0.9300 | 0.1348 |
| IL1RL2     | 0.7943 | 1.0469 | 0.9008 | 0.9782 | 0.9301 | 0.0542 |
| MCL1       | 0.9011 | 1.2513 | 0.9395 | 0.6284 | 0.9301 | 0.1275 |
| VWA5B1     | 0.8820 | 0.9181 | 1.0648 | 0.8553 | 0.9301 | 0.0467 |
| C6orf89    | 0.8314 | 1.1562 | 0.9362 | 0.7965 | 0.9301 | 0.0810 |
| SOHLH1     | 0.9901 | 0.9694 | 0.8162 | 0.9446 | 0.9301 | 0.0391 |
| MIR532     | 0.8678 | 1.1218 | 0.9539 | 0.7768 | 0.9301 | 0.0734 |
| OR52N5     | 0.8288 | 1.0467 | 0.9158 | 0.9291 | 0.9301 | 0.0448 |
| F8A3       | 0.8651 | 1.1476 | 0.9493 | 0.7585 | 0.9301 | 0.0823 |
| MBLAC1     | 1.0355 | 1.1498 | 0.7921 | 0.7430 | 0.9301 | 0.0972 |
| LOC642965  | 0.8412 | 1.1325 | 1.0521 | 0.6947 | 0.9301 | 0.0996 |
| LOC440607  | 0.8879 | 1.0578 | 0.9303 | 0.8445 | 0.9301 | 0.0460 |
| LOC1001287 | 0.8337 | 0.9350 | 1.0423 | 0.9096 | 0.9301 | 0.0431 |
| LOC1001288 | 0.8732 | 1.1292 | 0.8841 | 0.8341 | 0.9301 | 0.0672 |
| FLJ13614   | 0.7940 | 1.1417 | 0.9185 | 0.8663 | 0.9301 | 0.0750 |
| NDUFAF3    | 0.7460 | 1.2165 | 1.0406 | 0.7175 | 0.9301 | 0.1202 |
| RPS10P3    | 0.8615 | 1.1180 | 1.0456 | 0.6954 | 0.9301 | 0.0951 |
| PARS2      | 0.8695 | 1.1371 | 0.9555 | 0.7585 | 0.9301 | 0.0799 |
| LOC653781  | 0.8402 | 1.0621 | 0.9188 | 0.8996 | 0.9301 | 0.0470 |
| LOC647058  | 0.8788 | 0.9707 | 0.9408 | 0.9304 | 0.9302 | 0.0191 |
| FLJ38377   | 0.8811 | 1.0608 | 0.9404 | 0.8385 | 0.9302 | 0.0483 |
| FBF1       | 0.8962 | 0.9681 | 0.9428 | 0.9137 | 0.9302 | 0.0159 |
| MYLK2      | 0.7524 | 1.1836 | 0.9338 | 0.8512 | 0.9302 | 0.0922 |
| LOC642213  | 0.8599 | 1.0260 | 1.0214 | 0.8136 | 0.9302 | 0.0548 |
| LRP4       | 0.9283 | 0.9284 | 0.9416 | 0.9228 | 0.9303 | 0.0040 |
| LOC730134  | 0.8558 | 1.0157 | 0.9978 | 0.8518 | 0.9303 | 0.0443 |
| LOC646149  | 0.8937 | 1.0277 | 0.9734 | 0.8263 | 0.9303 | 0.0443 |
| FIBCD1     | 1.0211 | 0.8921 | 0.8793 | 0.9286 | 0.9303 | 0.0320 |
| LOC649497  | 0.8733 | 0.8911 | 1.0549 | 0.9019 | 0.9303 | 0.0420 |
| SNORD14A   | 0.8647 | 1.0671 | 0.9777 | 0.8116 | 0.9303 | 0.0573 |
| LOC388181  | 0.9416 | 1.0255 | 0.9055 | 0.8486 | 0.9303 | 0.0371 |
| RGS22      | 0.8621 | 1.0151 | 0.9961 | 0.8481 | 0.9303 | 0.0437 |
| SPOPL      | 0.8343 | 1.0590 | 0.9693 | 0.8588 | 0.9303 | 0.0520 |
| LOC1001289 | 0.9969 | 1.0357 | 0.8685 | 0.8204 | 0.9304 | 0.0512 |
| TNFRSF10A  | 0.7398 | 1.1911 | 0.9794 | 0.8112 | 0.9304 | 0.1004 |
| LOC1001336 | 0.8797 | 0.9946 | 0.9015 | 0.9458 | 0.9304 | 0.0254 |

|            |        |        |        |        |        |        |
|------------|--------|--------|--------|--------|--------|--------|
| TCP10      | 0.8815 | 1.0438 | 0.9599 | 0.8364 | 0.9304 | 0.0456 |
| LOC1001305 | 0.8930 | 1.0126 | 0.9831 | 0.8330 | 0.9304 | 0.0413 |
| TAS2R3     | 0.9185 | 1.0300 | 0.9264 | 0.8469 | 0.9304 | 0.0377 |
| LOC647044  | 0.9441 | 1.0559 | 0.9124 | 0.8094 | 0.9304 | 0.0507 |
| C18orf18   | 0.8242 | 0.9613 | 1.0471 | 0.8892 | 0.9305 | 0.0479 |
| HCRT       | 0.8293 | 1.0653 | 0.9328 | 0.8944 | 0.9305 | 0.0498 |
| FXYD5      | 0.8143 | 1.1303 | 0.8984 | 0.8789 | 0.9305 | 0.0690 |
| C14orf174  | 0.8638 | 1.0591 | 0.9958 | 0.8032 | 0.9305 | 0.0588 |
| LOC1001320 | 0.9762 | 0.9936 | 0.9055 | 0.8465 | 0.9305 | 0.0339 |
| FLJ43860   | 0.8759 | 0.9588 | 0.9896 | 0.8977 | 0.9305 | 0.0264 |
| HHLA2      | 0.8894 | 1.0037 | 0.9149 | 0.9139 | 0.9305 | 0.0251 |
| CSAG3      | 0.8723 | 1.1316 | 1.0594 | 0.6587 | 0.9305 | 0.1058 |
| LOC1001300 | 0.7238 | 1.0987 | 1.1205 | 0.7790 | 0.9305 | 0.1041 |
| LOC653377  | 0.8798 | 1.0600 | 1.1386 | 0.6436 | 0.9305 | 0.1099 |
| CSPG4LYP1  | 0.8224 | 1.0568 | 0.9970 | 0.8459 | 0.9305 | 0.0572 |
| ATP10B     | 0.9167 | 0.9927 | 0.9740 | 0.8387 | 0.9305 | 0.0346 |
| ACSBG1     | 0.9737 | 1.0888 | 0.8608 | 0.7988 | 0.9305 | 0.0640 |
| OR10H5     | 0.9341 | 1.0584 | 0.9362 | 0.7935 | 0.9306 | 0.0542 |
| FGF4       | 0.9084 | 0.9687 | 1.0178 | 0.8274 | 0.9306 | 0.0410 |
| CNTN2      | 0.8812 | 1.1202 | 0.9037 | 0.8171 | 0.9306 | 0.0658 |
| LOC283440  | 0.9184 | 0.8589 | 1.0511 | 0.8939 | 0.9306 | 0.0420 |
| AP1G2      | 0.8921 | 1.1640 | 0.9117 | 0.7545 | 0.9306 | 0.0853 |
| UBXN11     | 0.8868 | 1.0100 | 0.9529 | 0.8726 | 0.9306 | 0.0317 |
| SNORA23    | 0.8239 | 1.0458 | 0.9874 | 0.8653 | 0.9306 | 0.0518 |
| LOC643703  | 0.6079 | 1.1070 | 1.1072 | 0.9004 | 0.9306 | 0.1181 |
| LOC727811  | 0.9280 | 0.9614 | 1.0516 | 0.7815 | 0.9306 | 0.0561 |
| LOC729393  | 0.8569 | 1.0561 | 0.9140 | 0.8954 | 0.9306 | 0.0435 |
| LOC1001327 | 0.8657 | 1.0327 | 0.9175 | 0.9066 | 0.9306 | 0.0358 |
| ICAM1      | 0.8921 | 1.0162 | 0.9121 | 0.9021 | 0.9306 | 0.0288 |
| RSF1       | 0.8426 | 1.0358 | 0.9040 | 0.9401 | 0.9306 | 0.0404 |
| LOC646154  | 0.9249 | 0.9704 | 0.9527 | 0.8746 | 0.9306 | 0.0209 |
| LOC653750  | 0.9318 | 0.9433 | 0.9101 | 0.9373 | 0.9306 | 0.0072 |
| PIP4K2B    | 0.7847 | 1.1063 | 0.9887 | 0.8430 | 0.9306 | 0.0726 |
| FAM108A1   | 0.7742 | 1.0552 | 1.0775 | 0.8157 | 0.9306 | 0.0789 |
| NCOA5      | 0.8861 | 1.2169 | 0.8749 | 0.7448 | 0.9307 | 0.1007 |
| NBPF15     | 0.8967 | 1.0470 | 0.9525 | 0.8264 | 0.9307 | 0.0466 |
| OLFML2A    | 0.8003 | 1.0413 | 1.0130 | 0.8679 | 0.9307 | 0.0577 |
| LOC440180  | 0.9397 | 0.8966 | 1.0053 | 0.8811 | 0.9307 | 0.0278 |
| ZMAT4      | 0.9221 | 1.0431 | 0.9421 | 0.8154 | 0.9307 | 0.0467 |
| OR5D13     | 0.8459 | 1.0227 | 0.9554 | 0.8987 | 0.9307 | 0.0380 |
| BNIP2      | 0.7423 | 1.3624 | 0.9854 | 0.6327 | 0.9307 | 0.1617 |
| HS3ST4     | 0.8193 | 1.0760 | 0.9443 | 0.8831 | 0.9307 | 0.0548 |
| C8A        | 0.8633 | 0.9627 | 0.9648 | 0.9320 | 0.9307 | 0.0237 |
| ZNF565     | 0.8903 | 1.1263 | 0.9272 | 0.7790 | 0.9307 | 0.0724 |
| LOC649355  | 0.9354 | 0.9646 | 1.0358 | 0.7871 | 0.9307 | 0.0523 |
| PRR19      | 0.8192 | 1.0610 | 1.0377 | 0.8049 | 0.9307 | 0.0687 |

|            |        |        |        |        |        |        |
|------------|--------|--------|--------|--------|--------|--------|
| LOC1001294 | 0.8892 | 1.0095 | 0.9947 | 0.8294 | 0.9307 | 0.0431 |
| SNORD12    | 0.7846 | 1.0321 | 0.9550 | 0.9513 | 0.9307 | 0.0522 |
| ZSCAN5A    | 0.7724 | 1.3106 | 0.8624 | 0.7775 | 0.9307 | 0.1283 |
| SLC36A1    | 0.9565 | 0.9987 | 0.9010 | 0.8667 | 0.9307 | 0.0292 |
| EXOC8      | 0.8525 | 0.9787 | 0.9828 | 0.9091 | 0.9308 | 0.0311 |
| TGFBR3     | 0.8822 | 1.2170 | 0.9523 | 0.6717 | 0.9308 | 0.1125 |
| ST7OT3     | 0.8931 | 1.0128 | 0.9582 | 0.8590 | 0.9308 | 0.0342 |
| ZFR        | 0.9082 | 1.0784 | 1.0611 | 0.6755 | 0.9308 | 0.0933 |
| LOC642132  | 0.9444 | 1.0705 | 0.9095 | 0.7988 | 0.9308 | 0.0560 |
| CMPK2      | 0.9071 | 0.9576 | 0.9515 | 0.9070 | 0.9308 | 0.0138 |
| TMEM180    | 0.8899 | 1.0984 | 0.9383 | 0.7967 | 0.9308 | 0.0631 |
| KIAA1614   | 0.9728 | 0.8703 | 0.9970 | 0.8833 | 0.9309 | 0.0317 |
| C20orf66   | 0.8936 | 1.0218 | 0.9406 | 0.8674 | 0.9309 | 0.0339 |
| ICA1       | 0.8936 | 1.2854 | 0.8440 | 0.7004 | 0.9309 | 0.1251 |
| POTE2      | 0.9209 | 1.0170 | 0.9316 | 0.8541 | 0.9309 | 0.0335 |
| LOC728612  | 0.9488 | 1.0025 | 0.9550 | 0.8173 | 0.9309 | 0.0397 |
| C1orf120   | 0.9414 | 1.0843 | 0.9193 | 0.7787 | 0.9309 | 0.0625 |
| C11orf42   | 0.8973 | 1.1090 | 0.8556 | 0.8617 | 0.9309 | 0.0601 |
| LOC642334  | 0.8381 | 1.0414 | 1.0244 | 0.8197 | 0.9309 | 0.0591 |
| LOC653066  | 0.9210 | 1.0452 | 0.9399 | 0.8175 | 0.9309 | 0.0466 |
| C10orf6    | 0.8018 | 1.1602 | 0.9072 | 0.8545 | 0.9309 | 0.0794 |
| LOC644948  | 0.9513 | 1.0266 | 0.9049 | 0.8410 | 0.9309 | 0.0391 |
| SMAD5      | 0.7993 | 1.1611 | 0.9856 | 0.7777 | 0.9309 | 0.0898 |
| CTF1       | 0.9586 | 1.0022 | 0.9926 | 0.7705 | 0.9310 | 0.0543 |
| LOC648639  | 1.0235 | 0.9368 | 0.8879 | 0.8757 | 0.9310 | 0.0336 |
| GF11B      | 0.8358 | 1.0491 | 0.9797 | 0.8592 | 0.9310 | 0.0505 |
| C3orf71    | 0.9535 | 1.1608 | 0.9094 | 0.7002 | 0.9310 | 0.0944 |
| MIR320A    | 0.9078 | 1.0651 | 0.9162 | 0.8349 | 0.9310 | 0.0483 |
| CD207      | 0.9072 | 1.0554 | 0.9423 | 0.8190 | 0.9310 | 0.0489 |
| SCRN3      | 0.8011 | 1.1544 | 0.9820 | 0.7865 | 0.9310 | 0.0867 |
| C1QTNF4    | 0.8703 | 1.0158 | 0.9376 | 0.9003 | 0.9310 | 0.0315 |
| LOC644679  | 0.8735 | 1.0357 | 1.0068 | 0.8081 | 0.9310 | 0.0541 |
| C6orf58    | 0.9305 | 1.0506 | 1.0152 | 0.7278 | 0.9310 | 0.0723 |
| ZNF528     | 0.8815 | 0.9105 | 1.0158 | 0.9164 | 0.9310 | 0.0293 |
| DEPDC6     | 0.7896 | 1.1826 | 0.9478 | 0.8042 | 0.9310 | 0.0911 |
| LOC1001286 | 0.9931 | 1.0215 | 0.9041 | 0.8054 | 0.9310 | 0.0488 |
| LOC648620  | 0.8780 | 1.0933 | 0.9132 | 0.8397 | 0.9311 | 0.0561 |
| C4orf23    | 0.9430 | 1.0967 | 0.9165 | 0.7682 | 0.9311 | 0.0673 |
| LOC653325  | 0.9950 | 1.0575 | 0.7972 | 0.8748 | 0.9311 | 0.0586 |
| MIER1      | 0.8652 | 1.1234 | 0.9584 | 0.7774 | 0.9311 | 0.0740 |
| ANGEL2     | 0.8762 | 1.2088 | 0.9276 | 0.7119 | 0.9311 | 0.1034 |
| BCDIN3D    | 0.8147 | 1.4706 | 0.8328 | 0.6064 | 0.9311 | 0.1870 |
| CACNA1S    | 0.9053 | 1.1069 | 0.9583 | 0.7541 | 0.9312 | 0.0728 |
| HARS2      | 0.9399 | 1.0985 | 0.9276 | 0.7586 | 0.9312 | 0.0694 |
| BIN1       | 0.7704 | 1.2874 | 0.8802 | 0.7866 | 0.9312 | 0.1212 |
| HAX1       | 0.8042 | 1.3337 | 0.9242 | 0.6625 | 0.9312 | 0.1445 |

|            |        |        |        |        |        |        |
|------------|--------|--------|--------|--------|--------|--------|
| MIR1323    | 0.8877 | 1.0166 | 0.9756 | 0.8447 | 0.9312 | 0.0394 |
| LOC644736  | 0.8561 | 1.1750 | 0.8566 | 0.8370 | 0.9312 | 0.0814 |
| SMN1       | 0.8190 | 1.0277 | 1.0729 | 0.8051 | 0.9312 | 0.0694 |
| CSNK1D     | 0.8186 | 1.2263 | 0.9427 | 0.7372 | 0.9312 | 0.1071 |
| LOC652034  | 0.9684 | 0.9433 | 0.9568 | 0.8562 | 0.9312 | 0.0255 |
| KIAA0125   | 0.9052 | 0.9511 | 0.9994 | 0.8690 | 0.9312 | 0.0283 |
| ZNF136     | 0.8377 | 1.0829 | 0.9679 | 0.8363 | 0.9312 | 0.0592 |
| AARS       | 0.9616 | 1.2307 | 0.8348 | 0.6977 | 0.9312 | 0.1134 |
| CT45A6     | 0.8439 | 1.0915 | 0.9488 | 0.8406 | 0.9312 | 0.0590 |
| DENND2A    | 0.8063 | 1.0061 | 1.0237 | 0.8888 | 0.9312 | 0.0513 |
| XKR4       | 0.9510 | 1.1133 | 0.8874 | 0.7732 | 0.9312 | 0.0710 |
| MBTD1      | 0.7728 | 1.0905 | 1.0196 | 0.8420 | 0.9312 | 0.0743 |
| DEFB103A   | 0.9785 | 0.9981 | 0.8969 | 0.8515 | 0.9312 | 0.0345 |
| PDGFC      | 0.8496 | 1.0836 | 0.8892 | 0.9026 | 0.9312 | 0.0520 |
| RPN1       | 0.7785 | 1.3087 | 1.0575 | 0.5803 | 0.9313 | 0.1594 |
| NDOR1      | 0.8652 | 1.0401 | 0.9615 | 0.8582 | 0.9313 | 0.0433 |
| LOC647466  | 0.8725 | 1.0070 | 0.9041 | 0.9414 | 0.9313 | 0.0289 |
| FOXJ3      | 0.8414 | 1.1998 | 0.9126 | 0.7713 | 0.9313 | 0.0940 |
| TAS2R13    | 0.8402 | 1.0124 | 1.0033 | 0.8692 | 0.9313 | 0.0446 |
| LOC1001302 | 0.8833 | 0.9952 | 1.0180 | 0.8286 | 0.9313 | 0.0451 |
| OR1M1      | 0.8477 | 1.0422 | 0.8969 | 0.9383 | 0.9313 | 0.0413 |
| POLR2J2    | 0.8459 | 1.0375 | 1.0921 | 0.7498 | 0.9313 | 0.0803 |
| LOC286157  | 0.8631 | 1.1561 | 0.9234 | 0.7827 | 0.9313 | 0.0803 |
| LOC728183  | 0.8847 | 1.0856 | 0.9332 | 0.8217 | 0.9313 | 0.0563 |
| B3GNT9     | 0.9239 | 1.0770 | 0.8884 | 0.8360 | 0.9313 | 0.0518 |
| KCNK5      | 0.9155 | 1.0841 | 0.9640 | 0.7617 | 0.9313 | 0.0667 |
| LOC642660  | 0.7405 | 1.0215 | 0.9867 | 0.9767 | 0.9313 | 0.0643 |
| ZBTB37     | 0.8774 | 1.0372 | 0.9775 | 0.8332 | 0.9313 | 0.0464 |
| FGFR4      | 0.9018 | 1.0480 | 0.9664 | 0.8093 | 0.9314 | 0.0505 |
| LOC1001313 | 0.9013 | 0.9998 | 0.9204 | 0.9039 | 0.9314 | 0.0232 |
| CDKL3      | 0.8197 | 1.1393 | 0.9431 | 0.8233 | 0.9314 | 0.0750 |
| NCF1B      | 0.8428 | 1.0041 | 1.0083 | 0.8702 | 0.9314 | 0.0436 |
| MIR1204    | 0.7442 | 1.0825 | 0.9466 | 0.9521 | 0.9314 | 0.0698 |
| LOC387753  | 0.8340 | 1.0012 | 1.0325 | 0.8578 | 0.9314 | 0.0500 |
| MIR581     | 1.0174 | 0.9641 | 0.9232 | 0.8208 | 0.9314 | 0.0416 |
| LOC286002  | 0.9281 | 0.9560 | 0.9841 | 0.8573 | 0.9314 | 0.0272 |
| LOC1001344 | 0.9882 | 0.9529 | 0.9222 | 0.8623 | 0.9314 | 0.0267 |
| KIF19      | 0.8697 | 0.9673 | 0.9874 | 0.9013 | 0.9314 | 0.0276 |
| TMEM183A   | 0.6998 | 1.2645 | 1.0384 | 0.7229 | 0.9314 | 0.1352 |
| ZNF443     | 0.8214 | 1.1020 | 0.9533 | 0.8490 | 0.9314 | 0.0636 |
| LOC728648  | 0.9753 | 0.9140 | 0.9379 | 0.8985 | 0.9314 | 0.0167 |
| LOC1001314 | 0.8462 | 1.0210 | 0.9626 | 0.8960 | 0.9314 | 0.0382 |
| LOC644222  | 0.8618 | 1.1176 | 0.9087 | 0.8376 | 0.9314 | 0.0638 |
| FGF23      | 0.8173 | 1.1399 | 0.9355 | 0.8330 | 0.9314 | 0.0743 |
| MINPP1     | 0.7836 | 1.0944 | 1.0772 | 0.7707 | 0.9315 | 0.0892 |
| LOC1001299 | 0.8889 | 0.9965 | 0.9531 | 0.8875 | 0.9315 | 0.0265 |

|            |        |        |        |        |        |        |
|------------|--------|--------|--------|--------|--------|--------|
| LOC728241  | 0.8985 | 1.0298 | 0.9444 | 0.8531 | 0.9315 | 0.0377 |
| TMEM183B   | 0.6999 | 1.2536 | 1.0335 | 0.7389 | 0.9315 | 0.1307 |
| TALDO1     | 0.7311 | 1.2476 | 0.9773 | 0.7699 | 0.9315 | 0.1184 |
| ZBTB11     | 0.9152 | 1.0209 | 0.9104 | 0.8795 | 0.9315 | 0.0308 |
| LOC641823  | 0.8234 | 1.1441 | 0.9465 | 0.8120 | 0.9315 | 0.0771 |
| LOC645552  | 0.9145 | 1.0165 | 1.0601 | 0.7350 | 0.9315 | 0.0723 |
| PPA2       | 0.7865 | 1.2430 | 1.0329 | 0.6636 | 0.9315 | 0.1291 |
| LOC645459  | 0.9016 | 1.0698 | 1.0126 | 0.7421 | 0.9315 | 0.0722 |
| CEP27      | 0.7032 | 1.1750 | 1.0060 | 0.8419 | 0.9315 | 0.1020 |
| SCG5       | 0.7948 | 1.0601 | 0.9289 | 0.9423 | 0.9315 | 0.0543 |
| ANTXR1     | 0.8697 | 1.0960 | 0.9630 | 0.7974 | 0.9315 | 0.0645 |
| GRK5       | 0.7350 | 1.1916 | 0.9659 | 0.8337 | 0.9315 | 0.0987 |
| LOC651577  | 0.8086 | 1.0052 | 1.0650 | 0.8474 | 0.9315 | 0.0615 |
| HOXB2      | 0.8302 | 0.9369 | 1.0234 | 0.9357 | 0.9316 | 0.0395 |
| USP36      | 0.8285 | 1.1947 | 0.8946 | 0.8084 | 0.9316 | 0.0896 |
| LOC440280  | 0.9531 | 0.9775 | 1.0313 | 0.7643 | 0.9316 | 0.0581 |
| LOC645492  | 0.8943 | 1.0392 | 0.9713 | 0.8215 | 0.9316 | 0.0471 |
| LRRC14B    | 0.9004 | 1.0663 | 0.8511 | 0.9086 | 0.9316 | 0.0467 |
| LOC649971  | 0.8990 | 1.0331 | 0.9380 | 0.8563 | 0.9316 | 0.0377 |
| LOC1001313 | 0.9297 | 0.9720 | 0.9526 | 0.8722 | 0.9316 | 0.0216 |
| DCAF15     | 0.9288 | 1.0818 | 0.9020 | 0.8140 | 0.9316 | 0.0557 |
| EMR4P      | 1.0019 | 0.9837 | 0.8913 | 0.8497 | 0.9316 | 0.0365 |
| LOC647785  | 0.8414 | 0.9677 | 0.9727 | 0.9448 | 0.9316 | 0.0307 |
| LOC644117  | 0.9705 | 0.9170 | 0.9806 | 0.8584 | 0.9317 | 0.0281 |
| LOC647070  | 0.8412 | 1.0417 | 0.8723 | 0.9715 | 0.9317 | 0.0460 |
| HSPA1A     | 0.9617 | 0.9586 | 0.9553 | 0.8511 | 0.9317 | 0.0269 |
| LOC651208  | 0.8664 | 0.9739 | 1.0648 | 0.8215 | 0.9317 | 0.0547 |
| LOC643094  | 0.8698 | 0.9864 | 0.9412 | 0.9295 | 0.9317 | 0.0240 |
| ZBTB40     | 0.8910 | 1.0155 | 1.0078 | 0.8126 | 0.9317 | 0.0489 |
| ACSF3      | 0.8596 | 1.0626 | 0.9354 | 0.8692 | 0.9317 | 0.0468 |
| LOC651125  | 0.9697 | 0.9835 | 0.8744 | 0.8993 | 0.9317 | 0.0265 |
| POLA       | 0.8720 | 1.0847 | 0.8426 | 0.9275 | 0.9317 | 0.0540 |
| LOC728454  | 0.9032 | 0.9518 | 1.0000 | 0.8718 | 0.9317 | 0.0281 |
| CBLN1      | 0.8995 | 0.9802 | 0.9833 | 0.8639 | 0.9318 | 0.0298 |
| LOC731718  | 0.9575 | 1.0217 | 1.0376 | 0.7103 | 0.9318 | 0.0758 |
| TC2N       | 0.8217 | 1.1897 | 1.0635 | 0.6522 | 0.9318 | 0.1205 |
| LOC441453  | 0.8207 | 1.0961 | 0.9492 | 0.8612 | 0.9318 | 0.0610 |
| SERPINH1   | 0.8791 | 1.0033 | 0.9635 | 0.8814 | 0.9318 | 0.0309 |
| PRRX2      | 0.8751 | 0.9307 | 1.0074 | 0.9140 | 0.9318 | 0.0278 |
| RPL7       | 0.7990 | 1.0733 | 1.2624 | 0.5925 | 0.9318 | 0.1478 |
| AREGB      | 0.9278 | 0.9698 | 0.9467 | 0.8828 | 0.9318 | 0.0184 |
| C11orf72   | 0.8561 | 1.0992 | 0.9638 | 0.8082 | 0.9318 | 0.0646 |
| GAB4       | 0.8838 | 1.0714 | 0.9662 | 0.8060 | 0.9318 | 0.0569 |
| LOC392197  | 0.9726 | 0.9459 | 0.8921 | 0.9168 | 0.9318 | 0.0175 |
| FLVCR2     | 0.8153 | 1.2626 | 0.9246 | 0.7249 | 0.9318 | 0.1176 |
| CCL19      | 0.9403 | 0.9916 | 0.9298 | 0.8657 | 0.9318 | 0.0259 |

|            |        |        |        |        |        |        |
|------------|--------|--------|--------|--------|--------|--------|
| KIAA0240   | 0.8535 | 1.0856 | 1.0000 | 0.7883 | 0.9319 | 0.0677 |
| MRM1       | 0.8598 | 0.9689 | 1.0165 | 0.8823 | 0.9319 | 0.0367 |
| LOC401895  | 0.8984 | 1.0635 | 0.8518 | 0.9138 | 0.9319 | 0.0458 |
| RHBDF2     | 0.7834 | 1.1638 | 0.9748 | 0.8056 | 0.9319 | 0.0883 |
| LOC647706  | 0.9148 | 1.0166 | 0.9756 | 0.8207 | 0.9319 | 0.0426 |
| LOC652688  | 0.9334 | 0.8929 | 0.9769 | 0.9245 | 0.9319 | 0.0173 |
| OCLN       | 0.8427 | 1.0858 | 0.9617 | 0.8376 | 0.9319 | 0.0588 |
| LOC1001280 | 0.7651 | 1.1086 | 1.0345 | 0.8197 | 0.9319 | 0.0827 |
| AFAP1L2    | 0.8494 | 1.0613 | 0.9032 | 0.9140 | 0.9320 | 0.0454 |
| MIR187     | 0.7701 | 1.0478 | 1.0268 | 0.8832 | 0.9320 | 0.0652 |
| LOC651280  | 0.8623 | 1.0025 | 0.9919 | 0.8712 | 0.9320 | 0.0378 |
| GIYD1      | 0.8704 | 1.0857 | 1.0013 | 0.7705 | 0.9320 | 0.0697 |
| LOC649362  | 0.9162 | 0.9417 | 0.9596 | 0.9104 | 0.9320 | 0.0114 |
| LOC151121  | 0.9154 | 0.8959 | 1.0214 | 0.8951 | 0.9320 | 0.0302 |
| LOC1001313 | 0.9299 | 0.9483 | 1.0221 | 0.8277 | 0.9320 | 0.0401 |
| FKBP6      | 0.8701 | 1.0820 | 0.9579 | 0.8180 | 0.9320 | 0.0577 |
| LOC402221  | 0.8376 | 1.1995 | 1.0723 | 0.6186 | 0.9320 | 0.1286 |
| LOC647584  | 0.9080 | 0.8586 | 1.0123 | 0.9492 | 0.9320 | 0.0325 |
| LOC1001333 | 0.8566 | 1.0616 | 0.9504 | 0.8594 | 0.9320 | 0.0484 |
| LOC1001346 | 0.8913 | 1.0552 | 0.9685 | 0.8131 | 0.9320 | 0.0519 |
| GPR87      | 0.8733 | 1.0368 | 0.9316 | 0.8865 | 0.9320 | 0.0371 |
| LOC653362  | 0.7659 | 0.9493 | 1.1587 | 0.8542 | 0.9320 | 0.0843 |
| PROK2      | 0.9456 | 0.9986 | 1.0284 | 0.7557 | 0.9321 | 0.0612 |
| SP110      | 0.7738 | 1.2007 | 0.9924 | 0.7613 | 0.9321 | 0.1041 |
| CUTA       | 0.8651 | 1.3222 | 0.8426 | 0.6984 | 0.9321 | 0.1352 |
| CD80       | 0.8073 | 1.0532 | 0.9514 | 0.9164 | 0.9321 | 0.0507 |
| MAGEH1     | 0.8572 | 1.0628 | 0.9229 | 0.8854 | 0.9321 | 0.0456 |
| LOC643664  | 0.9373 | 1.0355 | 0.9370 | 0.8186 | 0.9321 | 0.0444 |
| HIGD2B     | 0.9436 | 0.9429 | 0.9674 | 0.8745 | 0.9321 | 0.0200 |
| WIPF3      | 1.0892 | 0.9170 | 0.8148 | 0.9075 | 0.9321 | 0.0572 |
| LOC641808  | 0.8216 | 1.0605 | 1.0150 | 0.8313 | 0.9321 | 0.0617 |
| NCRNA00167 | 0.9075 | 0.9816 | 0.9459 | 0.8935 | 0.9321 | 0.0199 |
| LOC1001329 | 0.9264 | 1.0114 | 0.9494 | 0.8414 | 0.9321 | 0.0352 |
| LOC131873  | 0.8897 | 1.0050 | 0.9474 | 0.8865 | 0.9321 | 0.0280 |
| KIAA1529   | 0.9009 | 1.0141 | 1.0889 | 0.7247 | 0.9322 | 0.0792 |
| HERC6      | 0.7592 | 1.3248 | 0.8922 | 0.7525 | 0.9322 | 0.1348 |
| RELB       | 0.9014 | 0.9716 | 0.9868 | 0.8690 | 0.9322 | 0.0281 |
| LOC1001331 | 0.8020 | 1.0443 | 0.9982 | 0.8842 | 0.9322 | 0.0549 |
| KIAA1549   | 0.9087 | 1.0017 | 1.0429 | 0.7756 | 0.9322 | 0.0593 |
| KARS       | 0.6173 | 1.2815 | 1.0911 | 0.7390 | 0.9322 | 0.1538 |
| C6orf132   | 0.7979 | 1.1982 | 0.9947 | 0.7382 | 0.9322 | 0.1042 |
| LOC729227  | 0.8786 | 1.0044 | 0.9517 | 0.8943 | 0.9323 | 0.0287 |
| SPANXN3    | 0.8113 | 1.1372 | 0.9003 | 0.8803 | 0.9323 | 0.0709 |
| FAM90A20   | 0.9115 | 1.0068 | 0.9979 | 0.8131 | 0.9323 | 0.0452 |
| MAP3K10    | 0.8814 | 0.9429 | 1.0665 | 0.8385 | 0.9323 | 0.0496 |
| N4BP2      | 0.6746 | 1.1750 | 1.0234 | 0.8562 | 0.9323 | 0.1078 |

|            |        |        |        |        |        |        |
|------------|--------|--------|--------|--------|--------|--------|
| SLC25A18   | 0.8032 | 1.0058 | 1.0079 | 0.9124 | 0.9323 | 0.0485 |
| LOC441511  | 0.8338 | 1.1018 | 1.0607 | 0.7331 | 0.9324 | 0.0888 |
| LOC728103  | 0.9284 | 0.9672 | 0.9873 | 0.8465 | 0.9324 | 0.0311 |
| CYP51A1    | 0.8780 | 1.0180 | 1.0405 | 0.7929 | 0.9324 | 0.0588 |
| S100A7     | 0.9116 | 0.9491 | 0.9849 | 0.8839 | 0.9324 | 0.0220 |
| BCOR       | 0.8617 | 1.2945 | 0.8468 | 0.7265 | 0.9324 | 0.1244 |
| LOC647456  | 0.8709 | 1.1553 | 0.8388 | 0.8646 | 0.9324 | 0.0746 |
| ASS1       | 0.9453 | 1.1801 | 0.9005 | 0.7037 | 0.9324 | 0.0978 |
| LOC440957  | 0.7622 | 1.2867 | 0.9539 | 0.7267 | 0.9324 | 0.1282 |
| C4orf50    | 0.8912 | 1.1034 | 0.8752 | 0.8597 | 0.9324 | 0.0574 |
| LOC1001320 | 0.9375 | 0.9682 | 1.0108 | 0.8132 | 0.9324 | 0.0425 |
| LOC642646  | 1.0226 | 0.8981 | 0.9276 | 0.8814 | 0.9324 | 0.0315 |
| DDX6       | 0.7682 | 1.1526 | 1.0765 | 0.7324 | 0.9324 | 0.1065 |
| PLIN       | 0.9245 | 1.0311 | 0.8686 | 0.9055 | 0.9324 | 0.0349 |
| C15orf38   | 0.8661 | 1.0870 | 1.0271 | 0.7494 | 0.9324 | 0.0768 |
| NFKBIB     | 0.8617 | 1.0468 | 1.0008 | 0.8204 | 0.9324 | 0.0542 |
| RAD50      | 0.9060 | 1.1118 | 0.8875 | 0.8245 | 0.9324 | 0.0623 |
| TMEM174    | 1.0714 | 0.8943 | 0.9270 | 0.8371 | 0.9324 | 0.0499 |
| ZNF557     | 0.7897 | 1.1684 | 0.9546 | 0.8170 | 0.9324 | 0.0865 |
| LIFR       | 0.8453 | 1.1490 | 0.8904 | 0.8451 | 0.9325 | 0.0730 |
| TMEM71     | 0.9016 | 0.9743 | 0.9490 | 0.9050 | 0.9325 | 0.0176 |
| LOC645852  | 0.8989 | 1.0871 | 0.9304 | 0.8134 | 0.9325 | 0.0572 |
| FAM21D     | 0.8494 | 1.0640 | 0.9842 | 0.8324 | 0.9325 | 0.0554 |
| PDCD2L     | 0.7001 | 1.3252 | 0.9053 | 0.7993 | 0.9325 | 0.1375 |
| MRPS25     | 0.7951 | 1.0099 | 1.0841 | 0.8407 | 0.9325 | 0.0685 |
| LOC649428  | 0.8597 | 0.9589 | 0.9830 | 0.9284 | 0.9325 | 0.0267 |
| LOC732441  | 0.9071 | 0.9582 | 0.9878 | 0.8769 | 0.9325 | 0.0249 |
| LOC642773  | 0.8548 | 1.1520 | 0.9141 | 0.8091 | 0.9325 | 0.0763 |
| NOD3       | 0.8663 | 0.9172 | 1.0110 | 0.9355 | 0.9325 | 0.0300 |
| PCYT1B     | 0.9313 | 1.0358 | 1.0028 | 0.7601 | 0.9325 | 0.0615 |
| C19orf71   | 0.7953 | 0.8978 | 1.0869 | 0.9501 | 0.9325 | 0.0607 |
| LOC646808  | 0.8996 | 1.0470 | 0.9906 | 0.7929 | 0.9325 | 0.0556 |
| USP29      | 0.7979 | 0.9970 | 1.0424 | 0.8930 | 0.9326 | 0.0547 |
| NOVA1      | 0.8176 | 1.0722 | 0.9978 | 0.8427 | 0.9326 | 0.0613 |
| LOC1001324 | 0.9437 | 1.0386 | 0.8898 | 0.8582 | 0.9326 | 0.0395 |
| MIR764     | 0.9447 | 1.0901 | 0.8506 | 0.8451 | 0.9326 | 0.0573 |
| MYO9A      | 0.8618 | 1.2667 | 0.8267 | 0.7751 | 0.9326 | 0.1128 |
| CMTM3      | 0.8101 | 1.0152 | 0.9901 | 0.9150 | 0.9326 | 0.0460 |
| LOC440459  | 0.8006 | 1.0781 | 1.0199 | 0.8318 | 0.9326 | 0.0685 |
| LOC148709  | 0.8586 | 0.9591 | 1.0048 | 0.9079 | 0.9326 | 0.0316 |
| LOC1001296 | 0.8718 | 1.0902 | 0.9442 | 0.8241 | 0.9326 | 0.0581 |
| U2AF1      | 0.7868 | 1.2251 | 0.9703 | 0.7482 | 0.9326 | 0.1089 |
| LOC606724  | 0.9111 | 0.9858 | 0.9512 | 0.8824 | 0.9326 | 0.0227 |
| LOC646936  | 0.7966 | 1.1041 | 0.9501 | 0.8796 | 0.9326 | 0.0652 |
| LOC1001291 | 0.8078 | 1.0687 | 0.9759 | 0.8780 | 0.9326 | 0.0570 |
| LOC647357  | 0.8881 | 1.0166 | 0.9148 | 0.9109 | 0.9326 | 0.0286 |



|            |        |        |        |        |        |        |
|------------|--------|--------|--------|--------|--------|--------|
| HCP5       | 0.8558 | 1.1889 | 0.8797 | 0.8060 | 0.9326 | 0.0868 |
| MIR523     | 0.9205 | 0.9744 | 1.0060 | 0.8296 | 0.9326 | 0.0386 |
| LOC649923  | 0.8613 | 0.8512 | 1.0538 | 0.9643 | 0.9327 | 0.0478 |
| FLJ38773   | 0.9526 | 0.9099 | 0.9875 | 0.8807 | 0.9327 | 0.0235 |
| NDUFA13    | 0.7537 | 1.2685 | 0.9806 | 0.7278 | 0.9327 | 0.1255 |
| FLJ40434   | 0.9020 | 0.9786 | 0.9621 | 0.8880 | 0.9327 | 0.0222 |
| ASCL2      | 0.8185 | 0.8806 | 1.1213 | 0.9103 | 0.9327 | 0.0657 |
| TTY18      | 0.8392 | 0.9681 | 1.0289 | 0.8946 | 0.9327 | 0.0415 |
| LOC162073  | 0.8487 | 1.0003 | 0.9657 | 0.9161 | 0.9327 | 0.0329 |
| SLC4A1AP   | 0.8601 | 1.2482 | 0.9226 | 0.6999 | 0.9327 | 0.1151 |
| CYP2A13    | 0.8164 | 0.9818 | 1.0518 | 0.8808 | 0.9327 | 0.0523 |
| ERCC-00123 | 0.8857 | 0.9409 | 0.9850 | 0.9194 | 0.9327 | 0.0208 |
| ACTA1      | 0.8442 | 0.9723 | 0.9849 | 0.9296 | 0.9327 | 0.0318 |
| LOC643577  | 0.9590 | 0.9296 | 0.9417 | 0.9007 | 0.9327 | 0.0123 |
| LOC442403  | 0.9568 | 0.9816 | 0.9426 | 0.8500 | 0.9327 | 0.0287 |
| LOC650557  | 0.9031 | 0.9722 | 0.9723 | 0.8835 | 0.9328 | 0.0231 |
| LOC1001307 | 0.8591 | 1.3249 | 0.8993 | 0.6477 | 0.9328 | 0.1419 |
| CYP26B1    | 0.8993 | 1.0015 | 0.9689 | 0.8613 | 0.9328 | 0.0319 |
| BTN3A1     | 0.8331 | 1.1006 | 0.9776 | 0.8197 | 0.9328 | 0.0664 |
| LOC643763  | 0.9626 | 0.9605 | 0.9880 | 0.8200 | 0.9328 | 0.0381 |
| MAMLD1     | 0.7350 | 1.1470 | 0.9132 | 0.9359 | 0.9328 | 0.0844 |
| NSUN4      | 0.9034 | 1.1127 | 1.0371 | 0.6779 | 0.9328 | 0.0953 |
| FAM187B    | 0.9522 | 0.9571 | 0.9002 | 0.9217 | 0.9328 | 0.0134 |
| GLRA4      | 0.9169 | 1.0871 | 0.9267 | 0.8005 | 0.9328 | 0.0589 |
| ZNF674     | 0.7407 | 1.3440 | 0.9330 | 0.7135 | 0.9328 | 0.1455 |
| LOC642815  | 0.8284 | 1.1052 | 0.9726 | 0.8250 | 0.9328 | 0.0670 |
| IQCB1      | 0.9074 | 1.1408 | 0.9316 | 0.7514 | 0.9328 | 0.0800 |
| LOC647359  | 0.7733 | 1.1805 | 0.8580 | 0.9194 | 0.9328 | 0.0878 |
| RBP5       | 0.8994 | 1.1098 | 0.8994 | 0.8225 | 0.9328 | 0.0617 |
| PSMD13     | 0.7342 | 1.2653 | 1.0257 | 0.7060 | 0.9328 | 0.1323 |
| TARS2      | 0.8315 | 1.0322 | 0.9984 | 0.8692 | 0.9328 | 0.0487 |
| SLC35E4    | 0.9559 | 0.8967 | 1.0733 | 0.8054 | 0.9328 | 0.0561 |
| LOC731714  | 0.9445 | 1.0820 | 0.8419 | 0.8630 | 0.9328 | 0.0544 |
| PHF14      | 0.8211 | 1.2448 | 1.0292 | 0.6362 | 0.9328 | 0.1314 |
| PCDHA2     | 0.8971 | 1.0421 | 1.0292 | 0.7629 | 0.9328 | 0.0654 |
| LOC200726  | 0.8454 | 0.9847 | 1.0353 | 0.8660 | 0.9328 | 0.0459 |
| ZNF187     | 0.8118 | 1.0901 | 1.0317 | 0.7979 | 0.9329 | 0.0749 |
| LOC648394  | 0.8703 | 1.0735 | 0.8930 | 0.8946 | 0.9329 | 0.0472 |
| LOC1001337 | 0.8553 | 1.0580 | 0.9786 | 0.8396 | 0.9329 | 0.0520 |
| PSMD5      | 0.9726 | 0.9034 | 1.0214 | 0.8341 | 0.9329 | 0.0409 |
| SP4        | 0.7894 | 1.1261 | 1.1165 | 0.6995 | 0.9329 | 0.1103 |
| ZIC3       | 0.8094 | 1.0444 | 0.9677 | 0.9101 | 0.9329 | 0.0495 |
| LOC1001336 | 0.8113 | 0.9976 | 1.0136 | 0.9090 | 0.9329 | 0.0466 |
| ALDOA      | 0.7344 | 1.3515 | 0.9402 | 0.7055 | 0.9329 | 0.1490 |
| KIAA1024   | 0.8906 | 1.0162 | 0.9272 | 0.8975 | 0.9329 | 0.0289 |
| B3GNT7     | 0.8961 | 1.1260 | 0.9173 | 0.7923 | 0.9329 | 0.0699 |

|            |        |        |        |        |        |        |
|------------|--------|--------|--------|--------|--------|--------|
| SLA        | 0.9419 | 0.9990 | 0.9104 | 0.8804 | 0.9329 | 0.0254 |
| CYP4F2     | 0.8661 | 1.0726 | 0.9053 | 0.8878 | 0.9329 | 0.0472 |
| ZSCAN20    | 0.9428 | 0.9630 | 0.9550 | 0.8709 | 0.9329 | 0.0211 |
| KRTAP21-1  | 0.8156 | 0.9679 | 1.0771 | 0.8712 | 0.9329 | 0.0574 |
| TMEM44     | 1.0089 | 1.0594 | 0.8728 | 0.7907 | 0.9329 | 0.0617 |
| LOC653787  | 0.8607 | 0.9865 | 0.9371 | 0.9476 | 0.9329 | 0.0263 |
| TCF20      | 0.8082 | 1.1613 | 0.9327 | 0.8297 | 0.9329 | 0.0808 |
| MED12L     | 0.8683 | 0.9718 | 1.0250 | 0.8667 | 0.9330 | 0.0393 |
| LOC642962  | 0.9693 | 0.9806 | 0.9062 | 0.8757 | 0.9330 | 0.0251 |
| C20orf111  | 0.8030 | 1.2013 | 1.0291 | 0.6985 | 0.9330 | 0.1130 |
| CHIC1      | 0.8029 | 1.0934 | 0.9958 | 0.8399 | 0.9330 | 0.0679 |
| CFC1B      | 0.8393 | 1.0747 | 0.9720 | 0.8459 | 0.9330 | 0.0562 |
| LOC400696  | 0.8828 | 0.9952 | 1.0056 | 0.8483 | 0.9330 | 0.0396 |
| C19orf46   | 0.8483 | 1.3700 | 0.8484 | 0.6652 | 0.9330 | 0.1519 |
| LOC151174  | 0.9136 | 1.0470 | 0.9178 | 0.8537 | 0.9330 | 0.0407 |
| LOC730995  | 0.9106 | 1.0296 | 0.9194 | 0.8723 | 0.9330 | 0.0338 |
| DOCK1      | 0.9590 | 1.1092 | 0.8618 | 0.8021 | 0.9330 | 0.0670 |
| LOC440928  | 0.8534 | 1.1609 | 1.0112 | 0.7066 | 0.9330 | 0.0982 |
| PRSS48     | 0.9230 | 1.0061 | 0.9845 | 0.8184 | 0.9330 | 0.0420 |
| LOC645636  | 0.8998 | 0.8747 | 1.0099 | 0.9477 | 0.9330 | 0.0298 |
| LOC653211  | 1.0150 | 1.0480 | 0.8911 | 0.7781 | 0.9330 | 0.0617 |
| TEX101     | 0.7840 | 0.9966 | 0.9531 | 0.9984 | 0.9330 | 0.0508 |
| PHOX2B     | 0.8531 | 1.0311 | 1.0101 | 0.8378 | 0.9330 | 0.0508 |
| SURF4      | 0.9099 | 1.3037 | 0.7722 | 0.7464 | 0.9330 | 0.1287 |
| LOC730294  | 0.9267 | 0.9255 | 0.9939 | 0.8860 | 0.9330 | 0.0224 |
| LOC643235  | 0.8690 | 1.1005 | 0.9189 | 0.8438 | 0.9331 | 0.0580 |
| LOC652668  | 0.9016 | 1.0538 | 0.9703 | 0.8066 | 0.9331 | 0.0524 |
| FLJ37307   | 0.7956 | 1.1013 | 0.9662 | 0.8692 | 0.9331 | 0.0661 |
| RABL5      | 1.0884 | 1.1142 | 0.7987 | 0.7311 | 0.9331 | 0.0982 |
| LOC1000085 | 0.5440 | 0.8096 | 1.2298 | 1.1490 | 0.9331 | 0.1585 |
| LOC1001297 | 0.8453 | 1.0270 | 1.0979 | 0.7622 | 0.9331 | 0.0779 |
| LOC652755  | 0.9024 | 1.2717 | 0.7433 | 0.8150 | 0.9331 | 0.1175 |
| LOC728190  | 0.8447 | 1.0400 | 1.0539 | 0.7938 | 0.9331 | 0.0666 |
| MTF2       | 0.7883 | 1.1744 | 1.1134 | 0.6565 | 0.9331 | 0.1252 |
| ARRDC5     | 0.8771 | 1.0618 | 1.0104 | 0.7832 | 0.9331 | 0.0633 |
| C20orf106  | 0.8924 | 1.0037 | 0.9820 | 0.8544 | 0.9331 | 0.0356 |
| ARG99      | 0.9130 | 0.9759 | 0.9427 | 0.9009 | 0.9331 | 0.0167 |
| LOC1001285 | 0.8462 | 1.0933 | 0.8959 | 0.8972 | 0.9331 | 0.0547 |
| ZNF728     | 0.8293 | 0.9864 | 1.0125 | 0.9043 | 0.9331 | 0.0416 |
| ACOT4      | 0.7750 | 1.1694 | 0.9144 | 0.8739 | 0.9332 | 0.0840 |
| BRF1       | 0.9055 | 1.0448 | 0.9209 | 0.8615 | 0.9332 | 0.0393 |
| LOC728844  | 0.8643 | 1.0327 | 0.9521 | 0.8838 | 0.9332 | 0.0381 |
| ACSL4      | 0.8136 | 0.9947 | 1.0778 | 0.8467 | 0.9332 | 0.0622 |
| SCN9A      | 0.9651 | 0.9921 | 0.9312 | 0.8444 | 0.9332 | 0.0321 |
| LOC1001287 | 0.9342 | 1.0365 | 0.8924 | 0.8698 | 0.9332 | 0.0369 |
| PLCD3      | 0.9356 | 1.0131 | 0.9401 | 0.8441 | 0.9332 | 0.0346 |

|            |        |        |        |        |        |        |
|------------|--------|--------|--------|--------|--------|--------|
| RPL39L     | 0.8851 | 1.0098 | 0.9678 | 0.8701 | 0.9332 | 0.0334 |
| ASB2       | 0.8163 | 1.0909 | 0.8455 | 0.9802 | 0.9332 | 0.0635 |
| TMEM182    | 0.8324 | 0.9671 | 1.0794 | 0.8540 | 0.9332 | 0.0570 |
| SERPINB12  | 0.8998 | 0.9411 | 0.9489 | 0.9431 | 0.9332 | 0.0113 |
| LOC649443  | 0.9147 | 0.9937 | 0.9145 | 0.9101 | 0.9332 | 0.0202 |
| LOC1001304 | 0.8706 | 0.9631 | 0.9703 | 0.9290 | 0.9332 | 0.0228 |
| NF2        | 0.8798 | 1.0139 | 0.9707 | 0.8686 | 0.9333 | 0.0353 |
| LOC1001329 | 0.8376 | 1.0545 | 0.9490 | 0.8919 | 0.9333 | 0.0464 |
| TGFBR2     | 0.8763 | 1.0559 | 0.9500 | 0.8509 | 0.9333 | 0.0460 |
| LMX1B      | 0.8579 | 1.0225 | 0.9929 | 0.8599 | 0.9333 | 0.0434 |
| KCNA4      | 0.8616 | 1.0776 | 0.9719 | 0.8222 | 0.9333 | 0.0576 |
| PPP1R14D   | 0.8711 | 0.9517 | 1.0626 | 0.8479 | 0.9333 | 0.0485 |
| LEKR1      | 0.8016 | 1.0743 | 1.0484 | 0.8091 | 0.9333 | 0.0741 |
| LOC1001305 | 0.9147 | 1.0616 | 0.9137 | 0.8434 | 0.9334 | 0.0459 |
| USP31      | 0.9019 | 1.0692 | 0.9143 | 0.8481 | 0.9334 | 0.0475 |
| ZNF394     | 0.7670 | 1.0899 | 1.0624 | 0.8141 | 0.9334 | 0.0832 |
| TRIM64     | 0.8566 | 1.0427 | 1.0156 | 0.8186 | 0.9334 | 0.0561 |
| LILRA4     | 0.8621 | 1.0883 | 0.9104 | 0.8728 | 0.9334 | 0.0527 |
| LOC645732  | 0.8755 | 1.0062 | 0.8671 | 0.9847 | 0.9334 | 0.0361 |
| DDX51      | 0.7678 | 1.0896 | 1.0832 | 0.7929 | 0.9334 | 0.0885 |
| MUC6       | 0.8433 | 0.9661 | 1.0073 | 0.9169 | 0.9334 | 0.0353 |
| VPS4A      | 1.0077 | 1.0963 | 0.9659 | 0.6637 | 0.9334 | 0.0939 |
| PRKAA2     | 0.9009 | 1.0287 | 0.9746 | 0.8294 | 0.9334 | 0.0435 |
| TBC1D22B   | 0.7941 | 1.1216 | 0.9559 | 0.8620 | 0.9334 | 0.0710 |
| LOC644113  | 0.8829 | 0.9857 | 1.0335 | 0.8316 | 0.9334 | 0.0463 |
| LOC643197  | 0.8339 | 1.0625 | 0.9531 | 0.8841 | 0.9334 | 0.0495 |
| LOC1001292 | 0.8976 | 0.9487 | 1.0354 | 0.8519 | 0.9334 | 0.0393 |
| MIR181C    | 0.8762 | 1.0291 | 0.9867 | 0.8416 | 0.9334 | 0.0445 |
| GlyBP      | 0.8595 | 1.0089 | 0.9800 | 0.8853 | 0.9334 | 0.0361 |
| PMS2L3     | 0.9049 | 1.0128 | 0.9734 | 0.8425 | 0.9334 | 0.0376 |
| SCARNA23   | 0.8463 | 1.0830 | 1.0144 | 0.7900 | 0.9334 | 0.0690 |
| MGC3020    | 0.9328 | 0.9313 | 0.9646 | 0.9051 | 0.9334 | 0.0122 |
| ZSWIM2     | 0.8034 | 1.0447 | 1.0128 | 0.8728 | 0.9334 | 0.0572 |
| LOC647022  | 0.9659 | 0.8400 | 1.0523 | 0.8756 | 0.9334 | 0.0477 |
| EGFL8      | 0.8484 | 0.9816 | 0.9495 | 0.9542 | 0.9335 | 0.0292 |
| LOC390829  | 1.0053 | 0.9382 | 0.9479 | 0.8426 | 0.9335 | 0.0337 |
| PAR5       | 0.7897 | 0.9867 | 1.1608 | 0.7968 | 0.9335 | 0.0884 |
| LOC648364  | 0.8348 | 1.0382 | 0.9742 | 0.8867 | 0.9335 | 0.0452 |
| NSL1       | 0.7233 | 1.1978 | 1.0650 | 0.7478 | 0.9335 | 0.1175 |
| LOC220998  | 0.9102 | 0.8843 | 1.1055 | 0.8341 | 0.9335 | 0.0595 |
| SNORD3D    | 0.9767 | 1.0043 | 0.9333 | 0.8199 | 0.9335 | 0.0406 |
| RNF152     | 0.9065 | 0.9330 | 1.0311 | 0.8637 | 0.9335 | 0.0355 |
| LOC1001288 | 0.8072 | 1.1003 | 1.0245 | 0.8023 | 0.9336 | 0.0760 |
| ZNF555     | 0.8791 | 0.9543 | 1.0246 | 0.8763 | 0.9336 | 0.0353 |
| C4orf36    | 0.8821 | 1.0627 | 0.9678 | 0.8216 | 0.9336 | 0.0525 |
| LOC642573  | 0.9479 | 0.9475 | 1.0190 | 0.8200 | 0.9336 | 0.0414 |

|            |        |        |        |        |        |        |
|------------|--------|--------|--------|--------|--------|--------|
| C19orf67   | 0.8796 | 0.9580 | 1.0272 | 0.8695 | 0.9336 | 0.0369 |
| LOC727752  | 0.8475 | 1.0613 | 0.9453 | 0.8802 | 0.9336 | 0.0472 |
| LGALS7     | 0.7606 | 0.9565 | 1.0719 | 0.9453 | 0.9336 | 0.0644 |
| C9orf163   | 0.7856 | 1.1794 | 0.9573 | 0.8121 | 0.9336 | 0.0902 |
| NDST3      | 0.9482 | 0.9824 | 0.9262 | 0.8776 | 0.9336 | 0.0220 |
| LOC339879  | 0.8467 | 1.0465 | 0.9585 | 0.8828 | 0.9336 | 0.0443 |
| LOC1001324 | 0.8421 | 1.1023 | 0.9902 | 0.7998 | 0.9336 | 0.0695 |
| P4HTM      | 0.8272 | 1.2071 | 0.9279 | 0.7722 | 0.9336 | 0.0967 |
| C11orf45   | 0.9353 | 0.9684 | 1.0111 | 0.8196 | 0.9336 | 0.0410 |
| COQ4       | 0.9888 | 1.0551 | 0.9126 | 0.7779 | 0.9336 | 0.0595 |
| LOC651754  | 0.8223 | 1.0582 | 0.9893 | 0.8647 | 0.9336 | 0.0546 |
| GCM1       | 0.8872 | 1.1005 | 0.9283 | 0.8185 | 0.9336 | 0.0600 |
| LOC442206  | 0.8463 | 1.0315 | 1.0079 | 0.8487 | 0.9336 | 0.0499 |
| PSG1       | 0.9140 | 0.9672 | 0.9929 | 0.8606 | 0.9337 | 0.0294 |
| LOC729249  | 0.9434 | 0.9555 | 0.9699 | 0.8658 | 0.9337 | 0.0233 |
| ZIM3       | 0.8182 | 1.0931 | 0.9823 | 0.8412 | 0.9337 | 0.0643 |
| LTF        | 0.8505 | 0.9202 | 0.9923 | 0.9718 | 0.9337 | 0.0316 |
| LOC732199  | 0.9259 | 0.9414 | 0.9951 | 0.8723 | 0.9337 | 0.0253 |
| CD72       | 0.9077 | 1.0024 | 0.9051 | 0.9197 | 0.9337 | 0.0231 |
| LOC644813  | 0.8365 | 1.0934 | 0.9512 | 0.8538 | 0.9337 | 0.0589 |
| LOC643550  | 0.9596 | 0.9946 | 0.9809 | 0.7998 | 0.9337 | 0.0452 |
| ZNF385D    | 0.9008 | 1.0424 | 0.9354 | 0.8564 | 0.9337 | 0.0396 |
| TRPV5      | 0.8440 | 0.9784 | 1.0418 | 0.8709 | 0.9337 | 0.0462 |
| LOC645445  | 0.9418 | 1.0251 | 0.9562 | 0.8120 | 0.9338 | 0.0445 |
| GUK1       | 0.8346 | 1.3954 | 0.8425 | 0.6626 | 0.9338 | 0.1594 |
| DOK5       | 0.8979 | 1.0315 | 0.9726 | 0.8331 | 0.9338 | 0.0433 |
| LOC650407  | 0.9146 | 1.0914 | 0.9354 | 0.7937 | 0.9338 | 0.0611 |
| C13orf25   | 0.8161 | 0.9612 | 1.0576 | 0.9003 | 0.9338 | 0.0509 |
| SLC30A6    | 0.8405 | 1.2166 | 0.9297 | 0.7484 | 0.9338 | 0.1013 |
| GCNT2      | 0.9294 | 1.1032 | 0.8694 | 0.8332 | 0.9338 | 0.0599 |
| ADAM11     | 0.8268 | 1.0251 | 0.9804 | 0.9031 | 0.9338 | 0.0437 |
| EDIL3      | 0.8686 | 0.9951 | 0.9843 | 0.8873 | 0.9338 | 0.0326 |
| LOC650263  | 0.9838 | 0.9282 | 0.9727 | 0.8507 | 0.9338 | 0.0302 |
| TRIP4      | 0.8259 | 1.2868 | 0.8704 | 0.7522 | 0.9338 | 0.1202 |
| C8orf77    | 0.9386 | 1.0778 | 0.9436 | 0.7753 | 0.9338 | 0.0619 |
| C11orf20   | 0.7446 | 1.1731 | 0.9787 | 0.8390 | 0.9338 | 0.0931 |
| LOC387756  | 0.8927 | 1.0006 | 1.0855 | 0.7567 | 0.9338 | 0.0710 |
| SNORA70C   | 0.8437 | 1.1647 | 0.9618 | 0.7652 | 0.9339 | 0.0869 |
| C21orf63   | 0.8178 | 1.0707 | 1.0182 | 0.8288 | 0.9339 | 0.0648 |
| FBXL13     | 0.8332 | 1.0864 | 0.9085 | 0.9072 | 0.9339 | 0.0538 |
| ZNF141     | 0.8823 | 0.8902 | 1.0432 | 0.9198 | 0.9339 | 0.0373 |
| LOC647802  | 0.9695 | 1.0456 | 0.8355 | 0.8849 | 0.9339 | 0.0464 |
| KIAA0408   | 0.7018 | 1.0253 | 1.1894 | 0.8190 | 0.9339 | 0.1083 |
| C1orf91    | 0.8770 | 1.0741 | 0.9687 | 0.8157 | 0.9339 | 0.0563 |
| POLR2J     | 0.8634 | 1.2878 | 0.8899 | 0.6945 | 0.9339 | 0.1257 |
| SIRPB2     | 0.9254 | 1.0317 | 0.9040 | 0.8745 | 0.9339 | 0.0342 |

|            |        |        |        |        |        |        |
|------------|--------|--------|--------|--------|--------|--------|
| PCGF1      | 0.8416 | 1.2349 | 0.8538 | 0.8055 | 0.9339 | 0.1008 |
| MESDC1     | 0.7642 | 1.1182 | 0.9942 | 0.8591 | 0.9339 | 0.0775 |
| ZNF365     | 0.8668 | 1.1218 | 0.9481 | 0.7990 | 0.9339 | 0.0697 |
| LOC641999  | 0.8646 | 1.1164 | 0.9262 | 0.8286 | 0.9340 | 0.0641 |
| SPANXC     | 0.8948 | 1.0786 | 0.9562 | 0.8062 | 0.9340 | 0.0572 |
| LOC153684  | 0.8372 | 0.9518 | 0.9694 | 0.9774 | 0.9340 | 0.0327 |
| LOC341378  | 0.9241 | 0.9582 | 0.9964 | 0.8572 | 0.9340 | 0.0295 |
| LOC642497  | 0.7790 | 1.0519 | 1.0124 | 0.8926 | 0.9340 | 0.0618 |
| GNGT2      | 0.9044 | 1.0756 | 0.8909 | 0.8650 | 0.9340 | 0.0479 |
| WDR31      | 0.8508 | 1.0778 | 0.9471 | 0.8603 | 0.9340 | 0.0526 |
| C1orf200   | 0.9183 | 0.9719 | 0.9681 | 0.8777 | 0.9340 | 0.0224 |
| LOC340274  | 0.8152 | 1.2338 | 0.8956 | 0.7913 | 0.9340 | 0.1024 |
| LOC440015  | 0.8846 | 1.0301 | 0.9864 | 0.8349 | 0.9340 | 0.0450 |
| SNORD8     | 0.7901 | 1.0749 | 1.0118 | 0.8592 | 0.9340 | 0.0660 |
| C1orf172   | 0.8739 | 1.2816 | 0.9495 | 0.6310 | 0.9340 | 0.1343 |
| ERCC-00046 | 0.9300 | 0.9662 | 0.9617 | 0.8782 | 0.9340 | 0.0203 |
| LOC645427  | 0.8476 | 0.9334 | 1.0062 | 0.9489 | 0.9340 | 0.0328 |
| C12orf44   | 0.9615 | 1.1441 | 0.8472 | 0.7834 | 0.9340 | 0.0791 |
| TRPA1      | 0.8827 | 1.0428 | 1.0404 | 0.7703 | 0.9341 | 0.0662 |
| LOC647894  | 0.8562 | 1.0488 | 0.9786 | 0.8526 | 0.9341 | 0.0482 |
| LOC1001336 | 0.8487 | 1.0301 | 0.9797 | 0.8778 | 0.9341 | 0.0426 |
| EED        | 0.8864 | 1.0153 | 0.9911 | 0.8436 | 0.9341 | 0.0411 |
| LOC1001344 | 0.9175 | 0.9826 | 0.9305 | 0.9058 | 0.9341 | 0.0169 |
| C19orf15   | 0.8660 | 1.0472 | 0.9967 | 0.8266 | 0.9341 | 0.0524 |
| LOC643853  | 0.8054 | 1.0661 | 1.0483 | 0.8167 | 0.9341 | 0.0712 |
| C8orf30A   | 0.7945 | 1.0674 | 0.9839 | 0.8908 | 0.9341 | 0.0589 |
| CAMK1G     | 0.9339 | 1.1100 | 0.8529 | 0.8398 | 0.9342 | 0.0622 |
| LOC645166  | 0.8496 | 1.3702 | 0.8421 | 0.6749 | 0.9342 | 0.1508 |
| LOC653496  | 0.8768 | 1.1092 | 0.9634 | 0.7873 | 0.9342 | 0.0685 |
| LOC392221  | 0.8949 | 1.1066 | 0.8866 | 0.8486 | 0.9342 | 0.0584 |
| FNTA       | 0.8297 | 1.2358 | 0.9827 | 0.6885 | 0.9342 | 0.1171 |
| MIR942     | 0.9716 | 0.9620 | 0.9719 | 0.8312 | 0.9342 | 0.0344 |
| MMP3       | 0.9447 | 0.9982 | 1.0061 | 0.7878 | 0.9342 | 0.0507 |
| PF4        | 0.9405 | 1.0205 | 0.8754 | 0.9005 | 0.9342 | 0.0317 |
| AGAP3      | 0.7842 | 1.1557 | 0.9583 | 0.8387 | 0.9342 | 0.0823 |
| ANKRD5     | 0.8827 | 1.0749 | 0.9362 | 0.8431 | 0.9342 | 0.0506 |
| TMEM189    | 0.8680 | 1.2913 | 0.8986 | 0.6791 | 0.9342 | 0.1285 |
| LOC1001334 | 0.8784 | 1.0622 | 0.8921 | 0.9043 | 0.9342 | 0.0430 |
| LOC1001338 | 0.7194 | 1.0586 | 1.0366 | 0.9224 | 0.9342 | 0.0776 |
| NANOS3     | 0.8967 | 0.9953 | 1.0224 | 0.8227 | 0.9343 | 0.0460 |
| LIPN       | 0.8665 | 0.9946 | 0.9218 | 0.9541 | 0.9343 | 0.0271 |
| DCP1B      | 0.8485 | 1.0425 | 0.9521 | 0.8940 | 0.9343 | 0.0418 |
| LOC653115  | 0.8849 | 0.9042 | 1.0360 | 0.9120 | 0.9343 | 0.0344 |
| H2BFXP     | 0.9063 | 1.0316 | 0.9529 | 0.8464 | 0.9343 | 0.0391 |
| DOCK11     | 0.8499 | 1.2235 | 0.9733 | 0.6904 | 0.9343 | 0.1125 |
| HTR3A      | 0.8317 | 1.0864 | 0.9351 | 0.8841 | 0.9343 | 0.0549 |

|            |        |        |        |        |        |        |
|------------|--------|--------|--------|--------|--------|--------|
| LOC645450  | 0.9363 | 0.9946 | 0.9577 | 0.8487 | 0.9343 | 0.0310 |
| LOC644836  | 0.7943 | 1.1486 | 0.9039 | 0.8906 | 0.9343 | 0.0755 |
| LOC729225  | 0.9515 | 0.9874 | 0.9930 | 0.8055 | 0.9343 | 0.0439 |
| GGA3       | 0.9015 | 1.1155 | 0.9186 | 0.8018 | 0.9343 | 0.0656 |
| LOC729882  | 0.8071 | 1.0485 | 0.9551 | 0.9268 | 0.9344 | 0.0498 |
| C10orf35   | 0.7471 | 1.2929 | 0.9856 | 0.7119 | 0.9344 | 0.1341 |
| LOC646144  | 0.8215 | 1.0788 | 0.9971 | 0.8400 | 0.9344 | 0.0622 |
| TAS2R43    | 0.8877 | 0.9898 | 0.9806 | 0.8794 | 0.9344 | 0.0295 |
| OGDH       | 0.9352 | 1.1954 | 0.8759 | 0.7310 | 0.9344 | 0.0970 |
| DLX2       | 0.9690 | 0.9908 | 0.9189 | 0.8588 | 0.9344 | 0.0293 |
| C22orf30   | 0.7115 | 1.3256 | 0.9550 | 0.7455 | 0.9344 | 0.1411 |
| LOC650412  | 0.7464 | 1.0373 | 1.0847 | 0.8691 | 0.9344 | 0.0779 |
| THOC2      | 0.7841 | 1.2270 | 1.0449 | 0.6816 | 0.9344 | 0.1239 |
| LOC645942  | 0.8663 | 1.2248 | 0.8315 | 0.8150 | 0.9344 | 0.0974 |
| CXCL17     | 0.8596 | 0.9798 | 1.0132 | 0.8851 | 0.9344 | 0.0368 |
| LOC647389  | 0.7946 | 1.0956 | 1.0304 | 0.8172 | 0.9344 | 0.0756 |
| LOC389160  | 0.8343 | 0.9893 | 1.0524 | 0.8619 | 0.9344 | 0.0518 |
| LOC391378  | 0.8542 | 1.0361 | 0.9763 | 0.8712 | 0.9344 | 0.0433 |
| LOC1001298 | 1.2096 | 0.9842 | 1.0150 | 0.5290 | 0.9344 | 0.1441 |
| LOC1001279 | 0.8851 | 1.0268 | 0.9781 | 0.8478 | 0.9345 | 0.0412 |
| C6orf208   | 0.8261 | 1.0729 | 0.9655 | 0.8735 | 0.9345 | 0.0545 |
| LOC648548  | 0.8869 | 0.9422 | 0.9161 | 0.9928 | 0.9345 | 0.0225 |
| TECPR1     | 0.8531 | 1.0920 | 0.9617 | 0.8311 | 0.9345 | 0.0598 |
| MDH1B      | 0.8394 | 1.0240 | 0.8948 | 0.9797 | 0.9345 | 0.0415 |
| LOC391825  | 1.0210 | 1.0573 | 0.9145 | 0.7452 | 0.9345 | 0.0700 |
| FAM120C    | 0.8343 | 0.9944 | 0.9372 | 0.9720 | 0.9345 | 0.0354 |
| SETDB1     | 0.8939 | 1.3419 | 0.8081 | 0.6940 | 0.9345 | 0.1418 |
| LOC650159  | 0.9175 | 1.1103 | 0.9258 | 0.7843 | 0.9345 | 0.0670 |
| PEF1       | 0.7564 | 1.2381 | 0.9857 | 0.7581 | 0.9346 | 0.1146 |
| PHOSPHO1   | 0.8565 | 1.1251 | 0.9001 | 0.8565 | 0.9346 | 0.0643 |
| LOC643933  | 0.8818 | 1.1859 | 0.8689 | 0.8016 | 0.9346 | 0.0856 |
| LOC401650  | 0.9589 | 1.0089 | 0.9671 | 0.8035 | 0.9346 | 0.0451 |
| LOC646781  | 0.9672 | 0.9117 | 1.0002 | 0.8592 | 0.9346 | 0.0311 |
| LOC1001311 | 0.9038 | 0.9671 | 0.9689 | 0.8986 | 0.9346 | 0.0193 |
| LOC649848  | 0.9084 | 0.9636 | 1.0240 | 0.8424 | 0.9346 | 0.0388 |
| LOC646135  | 0.9253 | 1.0485 | 1.0221 | 0.7425 | 0.9346 | 0.0693 |
| SLC24A3    | 0.8589 | 1.0488 | 0.9514 | 0.8794 | 0.9346 | 0.0429 |
| KRTAP8-1   | 0.8781 | 0.9782 | 0.9565 | 0.9257 | 0.9346 | 0.0217 |
| LOC1001342 | 0.8658 | 1.0898 | 0.9112 | 0.8717 | 0.9346 | 0.0527 |
| LOC344165  | 0.8474 | 0.9368 | 1.0408 | 0.9136 | 0.9346 | 0.0401 |
| KCTD18     | 0.9757 | 1.1303 | 0.9472 | 0.6855 | 0.9347 | 0.0923 |
| TCEAL2     | 0.8697 | 1.1457 | 0.8947 | 0.8287 | 0.9347 | 0.0716 |
| LOC642412  | 0.7876 | 1.2430 | 0.9277 | 0.7805 | 0.9347 | 0.1082 |
| C10orf131  | 0.8473 | 1.0165 | 1.0100 | 0.8650 | 0.9347 | 0.0455 |
| ZNHIT3     | 0.8326 | 1.2285 | 0.9568 | 0.7209 | 0.9347 | 0.1091 |
| LOC730101  | 0.9205 | 1.0518 | 0.9057 | 0.8608 | 0.9347 | 0.0410 |

|            |        |        |        |        |        |        |
|------------|--------|--------|--------|--------|--------|--------|
| C17orf72   | 0.8335 | 0.9978 | 0.9677 | 0.9399 | 0.9347 | 0.0357 |
| CACNB4     | 0.8342 | 1.0328 | 0.9478 | 0.9242 | 0.9347 | 0.0408 |
| LOC400298  | 0.9145 | 1.0766 | 0.9182 | 0.8297 | 0.9347 | 0.0515 |
| ANK3       | 0.8102 | 1.2026 | 0.9821 | 0.7441 | 0.9347 | 0.1024 |
| ZDHHC8     | 0.7763 | 1.4080 | 0.8264 | 0.7283 | 0.9347 | 0.1590 |
| LOC1001327 | 0.9197 | 0.9873 | 0.9573 | 0.8749 | 0.9348 | 0.0243 |
| VN1R5      | 0.8728 | 1.0348 | 0.9611 | 0.8705 | 0.9348 | 0.0395 |
| LOC642521  | 0.8283 | 1.0520 | 0.9782 | 0.8807 | 0.9348 | 0.0499 |
| MUC2       | 0.8718 | 1.0126 | 0.9157 | 0.9391 | 0.9348 | 0.0294 |
| LOC646129  | 0.8686 | 1.0410 | 0.9282 | 0.9014 | 0.9348 | 0.0375 |
| C15orf2    | 0.7638 | 1.0888 | 1.0096 | 0.8770 | 0.9348 | 0.0718 |
| LOC729519  | 0.8114 | 1.0262 | 1.0238 | 0.8778 | 0.9348 | 0.0538 |
| SHROOM3    | 1.0246 | 1.1688 | 0.8300 | 0.7160 | 0.9348 | 0.1007 |
| ATAD1      | 0.7530 | 1.1561 | 1.0838 | 0.7464 | 0.9348 | 0.1079 |
| TMEM72     | 0.9741 | 0.9476 | 0.9800 | 0.8376 | 0.9348 | 0.0332 |
| SGIP1      | 0.8733 | 1.0017 | 0.9666 | 0.8978 | 0.9348 | 0.0298 |
| FLJ32569   | 0.8569 | 1.0529 | 0.9757 | 0.8538 | 0.9349 | 0.0485 |
| TTC12      | 0.8250 | 1.1281 | 1.0310 | 0.7554 | 0.9349 | 0.0870 |
| ANKS6      | 0.8934 | 1.0474 | 0.9404 | 0.8581 | 0.9349 | 0.0411 |
| FAM108B1   | 0.8217 | 1.1573 | 0.9867 | 0.7737 | 0.9349 | 0.0871 |
| SNORD18C   | 0.8448 | 1.0104 | 0.9147 | 0.9696 | 0.9349 | 0.0359 |
| KIF18A     | 0.8197 | 1.0010 | 1.1456 | 0.7732 | 0.9349 | 0.0857 |
| SOCS2      | 0.9122 | 1.1840 | 0.9047 | 0.7386 | 0.9349 | 0.0922 |
| CYP4X1     | 0.9465 | 1.0116 | 0.9181 | 0.8634 | 0.9349 | 0.0308 |
| LOC729986  | 0.8670 | 0.9957 | 1.0156 | 0.8613 | 0.9349 | 0.0411 |
| LOC644829  | 0.8555 | 1.0868 | 0.9486 | 0.8486 | 0.9349 | 0.0555 |
| LOC641746  | 0.9209 | 1.0122 | 1.0112 | 0.7953 | 0.9349 | 0.0512 |
| FLJ20397   | 0.9149 | 1.0290 | 0.9325 | 0.8632 | 0.9349 | 0.0347 |
| LOC643131  | 0.9898 | 0.9418 | 0.8991 | 0.9089 | 0.9349 | 0.0204 |
| SYS1       | 0.8369 | 1.3639 | 0.8448 | 0.6941 | 0.9349 | 0.1471 |
| LOC650058  | 0.8957 | 0.9434 | 0.9789 | 0.9217 | 0.9350 | 0.0176 |
| HHEX       | 0.9189 | 1.0540 | 0.9447 | 0.8223 | 0.9350 | 0.0476 |
| LOC653186  | 0.8754 | 1.0208 | 0.9541 | 0.8896 | 0.9350 | 0.0334 |
| OR13C5     | 0.9568 | 0.8714 | 1.0501 | 0.8616 | 0.9350 | 0.0439 |
| LOC646513  | 0.8768 | 1.0315 | 0.9746 | 0.8569 | 0.9350 | 0.0412 |
| PSMB1      | 0.7437 | 1.3383 | 1.0705 | 0.5874 | 0.9350 | 0.1679 |
| PIK3CG     | 0.9021 | 1.0480 | 1.0278 | 0.7622 | 0.9350 | 0.0660 |
| CD1E       | 0.8811 | 1.0003 | 1.0201 | 0.8386 | 0.9350 | 0.0445 |
| DOK4       | 0.8591 | 1.0412 | 0.9553 | 0.8846 | 0.9350 | 0.0408 |
| LOC1001297 | 0.9004 | 0.9452 | 0.9465 | 0.9481 | 0.9350 | 0.0116 |
| IDO2       | 0.9309 | 0.9674 | 0.9243 | 0.9177 | 0.9350 | 0.0111 |
| SRC        | 0.8934 | 1.1898 | 0.8136 | 0.8434 | 0.9351 | 0.0865 |
| FER1L6     | 0.9896 | 0.9819 | 0.9229 | 0.8459 | 0.9351 | 0.0333 |
| GALNT12    | 0.9463 | 1.0092 | 0.8990 | 0.8858 | 0.9351 | 0.0279 |
| GAGE2C     | 0.9552 | 0.9001 | 1.0638 | 0.8211 | 0.9351 | 0.0510 |
| LPCAT2     | 0.8953 | 1.0545 | 0.9613 | 0.8292 | 0.9351 | 0.0481 |

|            |        |        |        |        |        |        |
|------------|--------|--------|--------|--------|--------|--------|
| MIR509-2   | 0.9445 | 0.9764 | 0.9793 | 0.8403 | 0.9351 | 0.0326 |
| LOC442448  | 0.9178 | 1.1252 | 0.9230 | 0.7745 | 0.9351 | 0.0721 |
| RUFY3      | 0.8194 | 1.1394 | 0.9765 | 0.8051 | 0.9351 | 0.0784 |
| C19orf18   | 0.9217 | 1.0544 | 0.9075 | 0.8569 | 0.9351 | 0.0421 |
| ULK4       | 0.9070 | 1.0648 | 0.9761 | 0.7926 | 0.9351 | 0.0574 |
| LOC652357  | 0.8319 | 1.0561 | 0.9997 | 0.8529 | 0.9351 | 0.0549 |
| C20orf107  | 0.9169 | 0.9707 | 0.9866 | 0.8664 | 0.9351 | 0.0274 |
| CORT       | 0.8680 | 1.0503 | 0.9681 | 0.8542 | 0.9351 | 0.0460 |
| NSMCE2     | 0.7977 | 1.3305 | 0.8950 | 0.7174 | 0.9352 | 0.1367 |
| GNG13      | 0.9313 | 0.9756 | 0.9592 | 0.8745 | 0.9352 | 0.0222 |
| ATF6B      | 0.8812 | 0.9950 | 0.9230 | 0.9416 | 0.9352 | 0.0236 |
| CA5B       | 0.8404 | 1.0737 | 0.9727 | 0.8539 | 0.9352 | 0.0549 |
| LOC648834  | 0.8021 | 1.0689 | 1.0332 | 0.8366 | 0.9352 | 0.0677 |
| HSD17B3    | 0.9665 | 1.0532 | 0.8598 | 0.8613 | 0.9352 | 0.0466 |
| LOC641784  | 0.8658 | 1.0290 | 0.9753 | 0.8708 | 0.9352 | 0.0402 |
| LINCR      | 0.7518 | 1.0282 | 1.0701 | 0.8908 | 0.9352 | 0.0721 |
| C12orf67   | 0.9411 | 1.0416 | 0.8576 | 0.9006 | 0.9352 | 0.0393 |
| LOC654080  | 0.8583 | 1.0634 | 0.9680 | 0.8513 | 0.9353 | 0.0504 |
| HOMER1     | 0.7181 | 1.0517 | 1.1790 | 0.7922 | 0.9353 | 0.1082 |
| TNKS2      | 0.9849 | 0.8035 | 1.0903 | 0.8624 | 0.9353 | 0.0640 |
| ZNRF3      | 0.8572 | 1.1988 | 0.8771 | 0.8081 | 0.9353 | 0.0890 |
| OR1E1      | 0.9315 | 0.9405 | 0.9811 | 0.8881 | 0.9353 | 0.0191 |
| POLG       | 0.8718 | 1.2153 | 0.8781 | 0.7760 | 0.9353 | 0.0962 |
| CPXM2      | 0.8621 | 0.9876 | 1.0039 | 0.8876 | 0.9353 | 0.0354 |
| C20orf144  | 0.8559 | 0.9897 | 1.0093 | 0.8864 | 0.9353 | 0.0378 |
| LOC651341  | 0.8721 | 1.0025 | 1.0277 | 0.8390 | 0.9353 | 0.0468 |
| GYS1       | 0.8883 | 1.0668 | 0.9508 | 0.8354 | 0.9353 | 0.0498 |
| LTB4R2     | 0.8838 | 0.9996 | 0.9727 | 0.8851 | 0.9353 | 0.0299 |
| LOC728772  | 0.9002 | 1.0777 | 0.9724 | 0.7912 | 0.9354 | 0.0603 |
| LOC730974  | 0.8845 | 1.0256 | 0.9801 | 0.8513 | 0.9354 | 0.0406 |
| MYOHD1     | 0.8287 | 1.1013 | 0.8901 | 0.9215 | 0.9354 | 0.0586 |
| LOC729335  | 0.9278 | 0.9438 | 0.9523 | 0.9177 | 0.9354 | 0.0078 |
| MAGED4B    | 0.9407 | 1.1023 | 0.9134 | 0.7852 | 0.9354 | 0.0651 |
| C2orf88    | 0.9004 | 1.0273 | 0.9112 | 0.9028 | 0.9354 | 0.0307 |
| CCDC121    | 0.9459 | 1.0743 | 0.9401 | 0.7815 | 0.9354 | 0.0599 |
| CGB8       | 0.9205 | 1.0605 | 0.9700 | 0.7908 | 0.9354 | 0.0563 |
| PLAC1      | 0.8498 | 0.9759 | 1.0307 | 0.8853 | 0.9354 | 0.0414 |
| LOC1001335 | 0.8518 | 1.0392 | 0.8726 | 0.9782 | 0.9354 | 0.0443 |
| LOC650568  | 0.9261 | 0.9559 | 0.8499 | 1.0098 | 0.9354 | 0.0334 |
| CELSR3     | 0.8904 | 1.0824 | 0.9213 | 0.8477 | 0.9354 | 0.0513 |
| DVL3       | 0.9222 | 1.2274 | 0.7854 | 0.8068 | 0.9354 | 0.1018 |
| LOC650841  | 0.9003 | 0.9738 | 1.0122 | 0.8554 | 0.9355 | 0.0354 |
| LOC641705  | 0.8489 | 1.0605 | 0.9502 | 0.8822 | 0.9355 | 0.0467 |
| LOC1001280 | 0.9305 | 1.0045 | 0.9020 | 0.9049 | 0.9355 | 0.0239 |
| LRRTM2     | 0.8124 | 1.0375 | 0.9115 | 0.9804 | 0.9355 | 0.0484 |
| C17orf51   | 0.9110 | 1.1121 | 0.9004 | 0.8184 | 0.9355 | 0.0624 |



|            |        |        |        |        |        |        |
|------------|--------|--------|--------|--------|--------|--------|
| OR52E6     | 0.8603 | 1.0445 | 0.8949 | 0.9422 | 0.9355 | 0.0400 |
| LOC90499   | 0.9408 | 1.0824 | 0.8900 | 0.8287 | 0.9355 | 0.0541 |
| BAG2       | 0.7743 | 1.1481 | 1.0120 | 0.8076 | 0.9355 | 0.0882 |
| LOC645162  | 0.9679 | 1.0047 | 0.9711 | 0.7985 | 0.9355 | 0.0464 |
| THRAP3     | 0.8370 | 1.3815 | 0.8532 | 0.6705 | 0.9355 | 0.1543 |
| LOC642934  | 0.8419 | 1.1348 | 1.1457 | 0.6198 | 0.9356 | 0.1266 |
| ZNF705A    | 0.8960 | 1.0212 | 0.9976 | 0.8275 | 0.9356 | 0.0451 |
| AMN1       | 0.9086 | 1.0056 | 1.0042 | 0.8239 | 0.9356 | 0.0436 |
| LOC1001300 | 0.9012 | 1.0467 | 0.8777 | 0.9167 | 0.9356 | 0.0379 |
| BRI3       | 0.8238 | 1.4657 | 0.8005 | 0.6523 | 0.9356 | 0.1807 |
| CPXM1      | 0.8968 | 1.0243 | 0.9839 | 0.8373 | 0.9356 | 0.0422 |
| DKFZp434E1 | 1.0044 | 1.0437 | 0.9024 | 0.7918 | 0.9356 | 0.0564 |
| GLI4       | 0.8298 | 1.1432 | 0.9662 | 0.8033 | 0.9356 | 0.0779 |
| LOC1001316 | 0.8196 | 1.0113 | 1.1909 | 0.7206 | 0.9356 | 0.1043 |
| LOC1001296 | 0.9022 | 0.9989 | 0.8815 | 0.9598 | 0.9356 | 0.0268 |
| SAT2       | 0.9576 | 1.2350 | 0.8499 | 0.7000 | 0.9356 | 0.1129 |
| KLK11      | 0.9609 | 0.9403 | 0.9419 | 0.8995 | 0.9356 | 0.0129 |
| LOC647123  | 0.8332 | 0.9968 | 0.9458 | 0.9670 | 0.9357 | 0.0357 |
| LOC652469  | 0.8990 | 0.9854 | 1.0370 | 0.8214 | 0.9357 | 0.0476 |
| LOC645334  | 0.8730 | 1.0838 | 1.0124 | 0.7735 | 0.9357 | 0.0696 |
| BTBD1      | 0.6933 | 1.3389 | 1.0460 | 0.6646 | 0.9357 | 0.1599 |
| PRO0611    | 0.7661 | 1.0281 | 1.0040 | 0.9447 | 0.9357 | 0.0592 |
| PIN1L      | 0.9344 | 0.9265 | 1.0133 | 0.8687 | 0.9357 | 0.0297 |
| SYN2       | 0.8770 | 1.0080 | 0.9996 | 0.8583 | 0.9357 | 0.0395 |
| LOC642883  | 0.9299 | 1.1659 | 0.8256 | 0.8216 | 0.9357 | 0.0807 |
| LOC643624  | 0.9362 | 1.0758 | 0.9483 | 0.7827 | 0.9358 | 0.0600 |
| MIR758     | 0.8915 | 1.0666 | 0.9234 | 0.8615 | 0.9358 | 0.0454 |
| LOC652543  | 0.8083 | 1.1257 | 0.9385 | 0.8706 | 0.9358 | 0.0687 |
| C20orf201  | 0.9358 | 0.9967 | 0.9622 | 0.8483 | 0.9358 | 0.0317 |
| TESSP1     | 0.9822 | 0.9965 | 0.8973 | 0.8671 | 0.9358 | 0.0317 |
| TEX15      | 0.7874 | 1.0326 | 0.9560 | 0.9671 | 0.9358 | 0.0523 |
| BTN2A3     | 0.9010 | 1.0565 | 0.9466 | 0.8391 | 0.9358 | 0.0459 |
| TUSC5      | 0.8358 | 1.0458 | 1.0586 | 0.8030 | 0.9358 | 0.0676 |
| LOC727808  | 0.7279 | 1.4334 | 0.8745 | 0.7075 | 0.9358 | 0.1700 |
| LOC1001332 | 0.9923 | 0.9908 | 0.9756 | 0.7846 | 0.9358 | 0.0505 |
| LINGO1     | 0.9382 | 1.0621 | 0.9419 | 0.8011 | 0.9358 | 0.0533 |
| LOC1001291 | 0.9261 | 0.9833 | 0.9773 | 0.8566 | 0.9358 | 0.0294 |
| SDHAP2     | 0.8917 | 1.2670 | 0.8631 | 0.7216 | 0.9358 | 0.1165 |
| FLJ34306   | 0.9069 | 1.0675 | 0.9680 | 0.8010 | 0.9359 | 0.0558 |
| NKAP       | 0.9241 | 1.0986 | 0.9247 | 0.7962 | 0.9359 | 0.0621 |
| LOC729204  | 0.8802 | 0.9806 | 0.8863 | 0.9965 | 0.9359 | 0.0306 |
| LOC1001303 | 0.7944 | 1.0376 | 1.0435 | 0.8680 | 0.9359 | 0.0623 |
| FOXR2      | 0.9288 | 0.9534 | 1.0290 | 0.8324 | 0.9359 | 0.0406 |
| TGM4       | 0.8377 | 1.0482 | 1.0007 | 0.8570 | 0.9359 | 0.0522 |
| BPIL2      | 0.9249 | 1.0329 | 0.9178 | 0.8680 | 0.9359 | 0.0347 |
| NUDT21     | 0.7541 | 1.1939 | 1.0433 | 0.7524 | 0.9359 | 0.1099 |

|            |        |        |        |        |        |        |
|------------|--------|--------|--------|--------|--------|--------|
| RFK        | 0.8836 | 1.0669 | 1.0197 | 0.7735 | 0.9359 | 0.0666 |
| PITPNM2    | 0.8733 | 1.2087 | 0.8585 | 0.8032 | 0.9359 | 0.0922 |
| LOC344967  | 0.8875 | 0.9617 | 1.0502 | 0.8444 | 0.9359 | 0.0451 |
| LOC220077  | 0.9317 | 0.9887 | 0.8960 | 0.9275 | 0.9359 | 0.0193 |
| FLJ40113   | 0.8537 | 1.0772 | 0.9104 | 0.9025 | 0.9360 | 0.0487 |
| FLJ35934   | 0.8880 | 1.0167 | 0.9476 | 0.8916 | 0.9360 | 0.0302 |
| COL11A2    | 0.8863 | 1.0164 | 0.9882 | 0.8530 | 0.9360 | 0.0393 |
| LOC728094  | 0.8826 | 0.9648 | 1.0214 | 0.8752 | 0.9360 | 0.0350 |
| MPHOSPH10  | 0.7678 | 1.2751 | 0.9791 | 0.7219 | 0.9360 | 0.1261 |
| LOC644689  | 0.8614 | 0.9936 | 0.9427 | 0.9462 | 0.9360 | 0.0274 |
| STK16      | 0.8490 | 1.1845 | 0.8665 | 0.8441 | 0.9360 | 0.0830 |
| ANKRD41    | 0.8652 | 1.0704 | 0.9639 | 0.8445 | 0.9360 | 0.0518 |
| SNCAIP     | 0.8803 | 1.0053 | 0.9913 | 0.8671 | 0.9360 | 0.0362 |
| LSM1       | 0.7061 | 1.3348 | 0.9706 | 0.7326 | 0.9360 | 0.1456 |
| LOC729275  | 0.8267 | 1.0838 | 0.9443 | 0.8892 | 0.9360 | 0.0548 |
| RAET1E     | 0.8394 | 1.0047 | 0.9979 | 0.9021 | 0.9360 | 0.0398 |
| MIR1302-6  | 0.8723 | 1.0638 | 0.8682 | 0.9400 | 0.9361 | 0.0457 |
| RABAC1     | 0.9403 | 1.1723 | 0.9904 | 0.6413 | 0.9361 | 0.1102 |
| ETF1       | 0.8134 | 1.3297 | 0.9436 | 0.6577 | 0.9361 | 0.1436 |
| LOC649580  | 0.7715 | 1.2152 | 0.8877 | 0.8700 | 0.9361 | 0.0965 |
| CCL26      | 0.9145 | 0.9902 | 1.0197 | 0.8199 | 0.9361 | 0.0446 |
| CDC2L1     | 0.9228 | 1.2443 | 0.8341 | 0.7433 | 0.9361 | 0.1091 |
| EML5       | 0.9202 | 1.0184 | 0.9292 | 0.8766 | 0.9361 | 0.0298 |
| GPATCH8    | 0.8593 | 1.1354 | 1.0045 | 0.7452 | 0.9361 | 0.0850 |
| LOC1001342 | 0.9119 | 0.9898 | 0.9583 | 0.8846 | 0.9361 | 0.0235 |
| IFRD2      | 0.8149 | 1.3417 | 0.9365 | 0.6515 | 0.9362 | 0.1473 |
| CCDC132    | 0.8926 | 1.0233 | 0.9956 | 0.8332 | 0.9362 | 0.0444 |
| DHX8       | 1.0008 | 1.0013 | 0.9168 | 0.8258 | 0.9362 | 0.0418 |
| SCYL1BP1   | 0.8740 | 1.0807 | 0.9808 | 0.8091 | 0.9362 | 0.0598 |
| GPX3       | 0.8542 | 1.0573 | 0.9518 | 0.8814 | 0.9362 | 0.0453 |
| FAM82B     | 0.9643 | 0.9624 | 0.9173 | 0.9009 | 0.9362 | 0.0160 |
| C7orf33    | 0.9204 | 0.9635 | 0.9416 | 0.9194 | 0.9362 | 0.0104 |
| LOC1001331 | 0.8950 | 0.9893 | 0.9700 | 0.8906 | 0.9362 | 0.0254 |
| LOC649227  | 0.8976 | 1.0049 | 1.0249 | 0.8175 | 0.9362 | 0.0485 |
| LOC644251  | 0.8597 | 0.9938 | 1.0214 | 0.8701 | 0.9362 | 0.0416 |
| NBPF8      | 0.8572 | 1.1025 | 0.9433 | 0.8421 | 0.9363 | 0.0597 |
| SPTY2D1    | 0.6957 | 1.1437 | 1.1116 | 0.7942 | 0.9363 | 0.1125 |
| LOC651794  | 0.9871 | 1.0424 | 0.8770 | 0.8387 | 0.9363 | 0.0473 |
| PARN       | 0.8599 | 1.1958 | 0.8806 | 0.8088 | 0.9363 | 0.0878 |
| MIR548H4   | 0.9324 | 0.9253 | 0.9653 | 0.9221 | 0.9363 | 0.0099 |
| ISL1       | 0.9147 | 0.9696 | 1.0198 | 0.8411 | 0.9363 | 0.0383 |
| C20orf26   | 0.7927 | 1.0177 | 1.0120 | 0.9228 | 0.9363 | 0.0526 |
| LOC1001321 | 0.8139 | 1.0499 | 0.9183 | 0.9631 | 0.9363 | 0.0491 |
| FAM133B    | 0.7607 | 1.2126 | 1.0523 | 0.7197 | 0.9363 | 0.1182 |
| LOC649886  | 0.8823 | 1.0604 | 0.9552 | 0.8473 | 0.9363 | 0.0471 |
| FSD1       | 0.8944 | 1.0549 | 0.9224 | 0.8735 | 0.9363 | 0.0408 |

|            |        |        |        |        |        |        |
|------------|--------|--------|--------|--------|--------|--------|
| AQP1       | 0.8207 | 1.1244 | 0.9389 | 0.8612 | 0.9363 | 0.0673 |
| LOC644899  | 0.9449 | 0.8976 | 1.0065 | 0.8963 | 0.9363 | 0.0260 |
| STRN       | 0.9841 | 1.1316 | 0.8360 | 0.7937 | 0.9363 | 0.0768 |
| LOC645001  | 0.8667 | 1.1682 | 0.8699 | 0.8406 | 0.9364 | 0.0775 |
| FLJ38717   | 0.8503 | 1.0602 | 0.9301 | 0.9049 | 0.9364 | 0.0445 |
| C1orf95    | 0.9105 | 1.0671 | 0.9161 | 0.8519 | 0.9364 | 0.0459 |
| LOC652274  | 0.8841 | 0.9847 | 0.9762 | 0.9007 | 0.9364 | 0.0257 |
| BMP5       | 0.9843 | 1.1296 | 0.8533 | 0.7784 | 0.9364 | 0.0772 |
| RAPGEF3    | 0.8616 | 1.0298 | 0.9572 | 0.8969 | 0.9364 | 0.0369 |
| LOC1001279 | 0.8243 | 0.9649 | 1.0179 | 0.9386 | 0.9364 | 0.0409 |
| KIAA1407   | 0.9008 | 1.0580 | 0.9196 | 0.8672 | 0.9364 | 0.0419 |
| LOC644641  | 0.8200 | 1.0668 | 1.0358 | 0.8230 | 0.9364 | 0.0666 |
| LOC642003  | 0.9177 | 1.0338 | 0.9237 | 0.8704 | 0.9364 | 0.0346 |
| LOC643253  | 0.9144 | 1.1317 | 0.9326 | 0.7669 | 0.9364 | 0.0749 |
| GPX4       | 0.7726 | 1.2865 | 1.0357 | 0.6509 | 0.9364 | 0.1417 |
| PROKR2     | 0.9647 | 0.9976 | 0.9729 | 0.8105 | 0.9364 | 0.0425 |
| LOC730427  | 0.8425 | 1.0557 | 0.9722 | 0.8754 | 0.9364 | 0.0484 |
| SNORD91A   | 0.8563 | 1.0018 | 1.0479 | 0.8398 | 0.9364 | 0.0520 |
| LOC1001330 | 0.8932 | 1.0420 | 0.9592 | 0.8514 | 0.9364 | 0.0416 |
| LOC651694  | 0.8343 | 1.0078 | 0.9970 | 0.9067 | 0.9364 | 0.0409 |
| IFLTD1     | 0.8831 | 1.0694 | 0.9603 | 0.8330 | 0.9364 | 0.0515 |
| LOC651886  | 0.8966 | 1.0633 | 0.9155 | 0.8704 | 0.9364 | 0.0433 |
| COMMD6     | 0.8018 | 1.2240 | 0.9788 | 0.7412 | 0.9365 | 0.1083 |
| PLCH1      | 0.8576 | 1.0914 | 0.9670 | 0.8299 | 0.9365 | 0.0595 |
| KCNQ3      | 0.8874 | 1.0049 | 0.9700 | 0.8836 | 0.9365 | 0.0303 |
| LOC1001343 | 0.9506 | 0.9684 | 0.9193 | 0.9076 | 0.9365 | 0.0140 |
| NIPAL1     | 0.8878 | 1.1137 | 0.9424 | 0.8020 | 0.9365 | 0.0658 |
| MYBL1      | 0.7767 | 1.1222 | 0.8998 | 0.9471 | 0.9365 | 0.0716 |
| LOC729209  | 0.8503 | 1.0666 | 1.0130 | 0.8160 | 0.9365 | 0.0611 |
| NPLOC4     | 0.9203 | 1.2313 | 0.8519 | 0.7425 | 0.9365 | 0.1049 |
| BBC3       | 0.8550 | 1.1879 | 0.9259 | 0.7772 | 0.9365 | 0.0891 |
| MIR1266    | 0.9710 | 1.0468 | 0.8864 | 0.8418 | 0.9365 | 0.0455 |
| HRH1       | 0.9302 | 1.1361 | 0.8790 | 0.8007 | 0.9365 | 0.0717 |
| LOC647244  | 0.8864 | 0.9689 | 0.9243 | 0.9664 | 0.9365 | 0.0196 |
| MIR30E     | 0.8999 | 1.0796 | 0.9624 | 0.8042 | 0.9365 | 0.0577 |
| FAM126A    | 0.8764 | 1.0824 | 0.8665 | 0.9208 | 0.9365 | 0.0500 |
| POLM       | 0.8628 | 1.0237 | 0.9972 | 0.8624 | 0.9365 | 0.0430 |
| LOC730004  | 0.7430 | 1.0968 | 1.1693 | 0.7371 | 0.9365 | 0.1144 |
| LOC653733  | 0.9307 | 1.0357 | 0.8464 | 0.9334 | 0.9365 | 0.0387 |
| LOC644297  | 0.9693 | 0.9692 | 0.9961 | 0.8115 | 0.9366 | 0.0421 |
| LOC1001296 | 0.8753 | 1.0022 | 0.9779 | 0.8909 | 0.9366 | 0.0314 |
| LOC1001299 | 0.8885 | 1.1265 | 0.8176 | 0.9136 | 0.9366 | 0.0665 |
| ZNF582     | 0.9189 | 1.0297 | 0.9197 | 0.8779 | 0.9366 | 0.0325 |
| LOC649652  | 0.9680 | 0.9970 | 0.9352 | 0.8461 | 0.9366 | 0.0327 |
| LOC648979  | 0.8972 | 0.9864 | 0.9407 | 0.9221 | 0.9366 | 0.0188 |
| DOK3       | 1.0180 | 0.9039 | 0.8827 | 0.9418 | 0.9366 | 0.0298 |

|            |        |        |        |        |        |        |
|------------|--------|--------|--------|--------|--------|--------|
| LOC1001342 | 0.8388 | 1.1082 | 0.9448 | 0.8546 | 0.9366 | 0.0618 |
| NUP43      | 0.8146 | 1.0198 | 1.1302 | 0.7819 | 0.9366 | 0.0833 |
| LOC651974  | 0.8465 | 0.9176 | 1.0608 | 0.9217 | 0.9366 | 0.0449 |
| LOC654780  | 0.9158 | 0.9757 | 0.9959 | 0.8592 | 0.9367 | 0.0309 |
| KCNA2      | 0.9213 | 1.0141 | 0.9115 | 0.8996 | 0.9367 | 0.0262 |
| MIR217     | 0.8943 | 0.9583 | 1.0012 | 0.8929 | 0.9367 | 0.0264 |
| DMC1       | 0.7965 | 1.0860 | 1.0221 | 0.8422 | 0.9367 | 0.0696 |
| PYROXD1    | 0.8493 | 0.9039 | 1.0877 | 0.9058 | 0.9367 | 0.0520 |
| WHSC1L1    | 0.8740 | 1.0871 | 0.9437 | 0.8419 | 0.9367 | 0.0544 |
| LOC442609  | 0.8361 | 0.9900 | 1.0639 | 0.8567 | 0.9367 | 0.0544 |
| ALDH18A1   | 0.6583 | 1.4610 | 0.9356 | 0.6920 | 0.9367 | 0.1854 |
| LOC649279  | 0.8104 | 1.1088 | 0.9515 | 0.8762 | 0.9367 | 0.0642 |
| SNORA48    | 0.7358 | 1.1669 | 1.0086 | 0.8356 | 0.9367 | 0.0952 |
| LOC1001313 | 0.9349 | 0.9550 | 0.9416 | 0.9154 | 0.9367 | 0.0082 |
| IGSF10     | 0.9731 | 1.0490 | 0.8749 | 0.8499 | 0.9367 | 0.0459 |
| DMRTC1     | 0.8892 | 0.9695 | 0.9843 | 0.9039 | 0.9367 | 0.0236 |
| ZC3HAV1L   | 0.8461 | 1.0637 | 0.9376 | 0.8996 | 0.9367 | 0.0463 |
| LOC653419  | 0.8912 | 1.0136 | 0.9732 | 0.8690 | 0.9367 | 0.0340 |
| NLRP11     | 0.8073 | 0.9898 | 1.0705 | 0.8794 | 0.9367 | 0.0583 |
| VPS25      | 0.8883 | 1.3177 | 0.9079 | 0.6332 | 0.9368 | 0.1416 |
| SNORA71A   | 0.8341 | 1.0935 | 0.9784 | 0.8409 | 0.9368 | 0.0619 |
| LOC652300  | 0.9166 | 0.9262 | 1.0102 | 0.8941 | 0.9368 | 0.0254 |
| LOC1001334 | 0.9025 | 0.9480 | 1.0086 | 0.8880 | 0.9368 | 0.0271 |
| LOC283143  | 0.9495 | 1.0068 | 0.9795 | 0.8114 | 0.9368 | 0.0434 |
| FAM92B     | 1.0144 | 0.9848 | 0.8462 | 0.9017 | 0.9368 | 0.0385 |
| GPR162     | 0.9317 | 1.0194 | 0.9335 | 0.8626 | 0.9368 | 0.0321 |
| C1orf108   | 1.0041 | 0.9724 | 0.9311 | 0.8395 | 0.9368 | 0.0357 |
| LOC641750  | 0.8684 | 0.9664 | 1.0006 | 0.9119 | 0.9368 | 0.0292 |
| LOC644548  | 0.9086 | 0.9917 | 0.9613 | 0.8857 | 0.9368 | 0.0242 |
| ARNTL      | 0.8264 | 1.1394 | 0.9897 | 0.7919 | 0.9368 | 0.0801 |
| HISPPD2A   | 0.9885 | 1.0998 | 0.8740 | 0.7850 | 0.9368 | 0.0684 |
| MIR554     | 0.8329 | 1.0059 | 1.0064 | 0.9022 | 0.9368 | 0.0424 |
| INTS10     | 0.8739 | 1.3246 | 0.8967 | 0.6521 | 0.9368 | 0.1405 |
| LOC648271  | 0.8610 | 0.9238 | 1.0098 | 0.9528 | 0.9368 | 0.0310 |
| LOC1001334 | 0.9206 | 1.0342 | 0.9901 | 0.8024 | 0.9368 | 0.0506 |
| ABCD3      | 0.8520 | 1.2311 | 0.8711 | 0.7933 | 0.9369 | 0.0995 |
| LOC646456  | 0.8808 | 1.0958 | 0.9003 | 0.8706 | 0.9369 | 0.0533 |
| SNORD3A    | 0.8730 | 1.0219 | 1.0705 | 0.7820 | 0.9369 | 0.0666 |
| SCGBL      | 0.9760 | 0.9548 | 0.9400 | 0.8766 | 0.9369 | 0.0214 |
| KBTBD7     | 0.8318 | 1.0142 | 1.1289 | 0.7725 | 0.9369 | 0.0821 |
| RGS9BP     | 0.9019 | 1.1249 | 0.9506 | 0.7701 | 0.9369 | 0.0734 |
| LOC1001280 | 0.9142 | 0.9079 | 0.9320 | 0.9935 | 0.9369 | 0.0195 |
| LOC732275  | 0.8240 | 1.0109 | 1.0242 | 0.8885 | 0.9369 | 0.0485 |
| CLECL1     | 0.8756 | 0.9824 | 0.9638 | 0.9257 | 0.9369 | 0.0236 |
| CFHR2      | 0.9722 | 1.0325 | 0.9201 | 0.8228 | 0.9369 | 0.0444 |
| MAF1       | 0.8892 | 1.2463 | 0.9154 | 0.6967 | 0.9369 | 0.1141 |

|            |        |        |        |        |        |        |
|------------|--------|--------|--------|--------|--------|--------|
| CNOT4      | 0.7941 | 1.1773 | 0.9984 | 0.7778 | 0.9369 | 0.0946 |
| STK38L     | 0.8411 | 0.9849 | 1.0267 | 0.8950 | 0.9369 | 0.0421 |
| LOC645322  | 0.9156 | 0.9427 | 1.0156 | 0.8738 | 0.9369 | 0.0298 |
| ASB16      | 0.9598 | 0.9173 | 0.9428 | 0.9278 | 0.9369 | 0.0093 |
| LOC642832  | 0.9929 | 0.9854 | 0.9396 | 0.8299 | 0.9369 | 0.0376 |
| ANKRD20A1  | 0.9115 | 1.0895 | 0.9559 | 0.7910 | 0.9370 | 0.0616 |
| TRIM16     | 0.9440 | 1.0280 | 0.9202 | 0.8558 | 0.9370 | 0.0356 |
| LOC392781  | 0.8565 | 0.9700 | 1.0564 | 0.8651 | 0.9370 | 0.0474 |
| LOC647710  | 0.7323 | 1.0999 | 0.9883 | 0.9275 | 0.9370 | 0.0770 |
| LOC645405  | 0.9193 | 1.0109 | 0.9670 | 0.8509 | 0.9370 | 0.0343 |
| POLH       | 0.9321 | 0.9723 | 1.0094 | 0.8344 | 0.9370 | 0.0377 |
| RABIF      | 0.9227 | 1.0661 | 0.9896 | 0.7697 | 0.9370 | 0.0630 |
| SPARC      | 0.9365 | 1.0444 | 0.9200 | 0.8473 | 0.9371 | 0.0407 |
| HRB        | 0.7023 | 1.1535 | 1.0933 | 0.7991 | 0.9371 | 0.1101 |
| ATP2C2     | 0.8623 | 1.2691 | 0.8404 | 0.7764 | 0.9371 | 0.1122 |
| LOC729266  | 0.9159 | 0.9280 | 1.0518 | 0.8526 | 0.9371 | 0.0417 |
| PRSS36     | 0.9317 | 1.0539 | 0.9562 | 0.8065 | 0.9371 | 0.0509 |
| FLJ30428   | 0.8873 | 1.0682 | 0.9522 | 0.8407 | 0.9371 | 0.0493 |
| ZNF267     | 0.8617 | 1.1838 | 0.9263 | 0.7765 | 0.9371 | 0.0878 |
| LOC1001335 | 0.9257 | 0.9782 | 0.9554 | 0.8890 | 0.9371 | 0.0193 |
| ZNF497     | 0.9117 | 1.0025 | 0.9763 | 0.8578 | 0.9371 | 0.0326 |
| C19orf57   | 0.9280 | 1.0821 | 0.8951 | 0.8431 | 0.9371 | 0.0514 |
| SLC16A11   | 0.8786 | 0.9070 | 0.9835 | 0.9793 | 0.9371 | 0.0262 |
| TBC1D16    | 0.9331 | 1.0879 | 0.9461 | 0.7813 | 0.9371 | 0.0626 |
| MAGIX      | 0.8443 | 0.9616 | 1.0101 | 0.9324 | 0.9371 | 0.0348 |
| LOC729760  | 0.8612 | 1.1023 | 0.8929 | 0.8922 | 0.9371 | 0.0555 |
| PCYT1A     | 0.9393 | 1.0485 | 0.9118 | 0.8489 | 0.9371 | 0.0417 |
| KDR        | 0.8991 | 0.9989 | 0.9391 | 0.9114 | 0.9371 | 0.0222 |
| MIR490     | 0.9606 | 0.9760 | 0.8572 | 0.9547 | 0.9371 | 0.0270 |
| LOC644921  | 0.8140 | 1.0893 | 0.8788 | 0.9664 | 0.9371 | 0.0596 |
| LOC646312  | 0.9253 | 1.0070 | 0.9515 | 0.8647 | 0.9371 | 0.0295 |
| LOC645453  | 0.8626 | 1.0082 | 0.9793 | 0.8985 | 0.9371 | 0.0340 |
| BP75       | 0.7687 | 1.2253 | 0.9452 | 0.8095 | 0.9372 | 0.1032 |
| PCDHGB4    | 0.9723 | 1.0438 | 0.8477 | 0.8850 | 0.9372 | 0.0441 |
| LOC730027  | 0.8541 | 1.1024 | 0.9040 | 0.8883 | 0.9372 | 0.0560 |
| LOC347364  | 1.0386 | 1.0100 | 0.9062 | 0.7941 | 0.9372 | 0.0556 |
| LOC652368  | 0.8762 | 0.9428 | 0.9816 | 0.9483 | 0.9372 | 0.0221 |
| MIIP       | 0.8474 | 1.0939 | 0.9164 | 0.8912 | 0.9372 | 0.0541 |
| LOC653580  | 0.9595 | 0.9960 | 0.8885 | 0.9048 | 0.9372 | 0.0248 |
| C16orf65   | 0.7943 | 1.0557 | 1.0165 | 0.8825 | 0.9372 | 0.0604 |
| NOS2       | 0.9666 | 1.0073 | 0.9312 | 0.8439 | 0.9372 | 0.0348 |
| PGM2L1     | 0.8924 | 1.0840 | 1.0154 | 0.7572 | 0.9373 | 0.0719 |
| LOC1001288 | 0.8955 | 0.9217 | 1.0281 | 0.9037 | 0.9373 | 0.0308 |
| RAMP3      | 0.8635 | 0.9684 | 0.9637 | 0.9535 | 0.9373 | 0.0248 |
| LOC338598  | 0.9323 | 0.9208 | 0.9628 | 0.9333 | 0.9373 | 0.0090 |
| LOC728774  | 0.9070 | 0.9420 | 1.0818 | 0.8183 | 0.9373 | 0.0548 |

|            |        |        |        |        |        |        |
|------------|--------|--------|--------|--------|--------|--------|
| ZNF575     | 0.8488 | 0.9817 | 0.9860 | 0.9328 | 0.9373 | 0.0319 |
| LOC645165  | 0.8261 | 1.1357 | 1.0092 | 0.7782 | 0.9373 | 0.0828 |
| MKX        | 0.8549 | 1.0329 | 0.8982 | 0.9634 | 0.9373 | 0.0389 |
| TMEM100    | 0.9735 | 1.1580 | 0.8380 | 0.7798 | 0.9373 | 0.0840 |
| FLJ16331   | 0.9511 | 0.9020 | 1.0081 | 0.8881 | 0.9373 | 0.0272 |
| C6orf153   | 0.7434 | 1.4097 | 0.9335 | 0.6629 | 0.9373 | 0.1674 |
| LOC441251  | 0.8869 | 0.9620 | 1.1367 | 0.7639 | 0.9374 | 0.0780 |
| ACP6       | 0.8348 | 1.3334 | 0.8194 | 0.7619 | 0.9374 | 0.1329 |
| OR1C1      | 0.8045 | 1.1236 | 0.9735 | 0.8479 | 0.9374 | 0.0717 |
| LOC729569  | 0.8710 | 1.1605 | 0.8636 | 0.8545 | 0.9374 | 0.0744 |
| LOC1001290 | 0.9532 | 1.0389 | 0.9252 | 0.8323 | 0.9374 | 0.0426 |
| LOC646223  | 0.7604 | 1.1963 | 1.0423 | 0.7508 | 0.9374 | 0.1096 |
| LOC653206  | 0.8221 | 1.0628 | 0.9681 | 0.8969 | 0.9375 | 0.0513 |
| SERPINB11  | 0.9403 | 0.9973 | 0.9310 | 0.8812 | 0.9375 | 0.0238 |
| OR56A3     | 0.8902 | 0.9871 | 0.9462 | 0.9264 | 0.9375 | 0.0202 |
| SIGLEC11   | 0.8221 | 1.0567 | 0.9483 | 0.9229 | 0.9375 | 0.0482 |
| LOC653225  | 0.9276 | 1.0122 | 0.9172 | 0.8930 | 0.9375 | 0.0259 |
| ALX1       | 0.6998 | 1.0952 | 1.1085 | 0.8464 | 0.9375 | 0.0995 |
| DEPDC5     | 0.8500 | 1.0834 | 0.8951 | 0.9215 | 0.9375 | 0.0508 |
| LOC644423  | 0.8578 | 1.1852 | 0.8739 | 0.8331 | 0.9375 | 0.0830 |
| CLC        | 0.8285 | 1.0763 | 1.0245 | 0.8207 | 0.9375 | 0.0661 |
| IL8RBP     | 0.9013 | 0.9777 | 0.9139 | 0.9571 | 0.9375 | 0.0180 |
| ANP32C     | 0.8587 | 1.0307 | 1.0328 | 0.8279 | 0.9375 | 0.0548 |
| KIF16B     | 0.9040 | 1.0832 | 0.9326 | 0.8302 | 0.9375 | 0.0531 |
| HIF1A      | 0.7933 | 1.2411 | 1.0376 | 0.6781 | 0.9375 | 0.1259 |
| LOC389203  | 0.7853 | 1.3090 | 0.9095 | 0.7463 | 0.9375 | 0.1286 |
| LINGO3     | 0.8583 | 1.0655 | 1.0547 | 0.7717 | 0.9375 | 0.0730 |
| LOC1001299 | 1.0275 | 1.0416 | 0.8911 | 0.7900 | 0.9375 | 0.0598 |
| LOC1001328 | 0.8248 | 1.0996 | 0.9067 | 0.9191 | 0.9376 | 0.0579 |
| C7orf42    | 0.8620 | 1.3123 | 0.9376 | 0.6385 | 0.9376 | 0.1401 |
| HNRPC      | 0.8141 | 1.1012 | 1.1566 | 0.6785 | 0.9376 | 0.1144 |
| AQP7P1     | 0.8462 | 1.0177 | 0.8800 | 1.0065 | 0.9376 | 0.0436 |
| USP9Y      | 1.0354 | 0.9438 | 0.9798 | 0.7914 | 0.9376 | 0.0523 |
| LOC344741  | 0.8556 | 1.0591 | 0.9812 | 0.8546 | 0.9376 | 0.0502 |
| ATP11C     | 0.7695 | 1.1057 | 1.1402 | 0.7351 | 0.9376 | 0.1074 |
| LOC729242  | 0.8755 | 0.9308 | 1.0198 | 0.9243 | 0.9376 | 0.0301 |
| LOC643395  | 0.7831 | 1.0094 | 1.0270 | 0.9311 | 0.9376 | 0.0556 |
| MFN2       | 0.7848 | 1.4477 | 0.8925 | 0.6254 | 0.9376 | 0.1787 |
| LOC728408  | 0.8074 | 1.0790 | 1.0540 | 0.8103 | 0.9376 | 0.0746 |
| LRRC46     | 0.9573 | 1.1088 | 0.8106 | 0.8739 | 0.9376 | 0.0645 |
| THEM5      | 0.8733 | 1.0172 | 1.0244 | 0.8357 | 0.9376 | 0.0486 |
| GNAL       | 0.8571 | 1.0615 | 0.9342 | 0.8978 | 0.9376 | 0.0442 |
| LOC1001339 | 0.9089 | 0.9848 | 0.9714 | 0.8855 | 0.9376 | 0.0240 |
| TMEM89     | 0.8571 | 1.1724 | 0.7999 | 0.9212 | 0.9376 | 0.0821 |
| C6orf140   | 0.9152 | 1.0364 | 0.8980 | 0.9010 | 0.9376 | 0.0331 |
| LOC389024  | 0.8320 | 1.1466 | 0.8683 | 0.9038 | 0.9377 | 0.0712 |

|            |        |        |        |        |        |        |
|------------|--------|--------|--------|--------|--------|--------|
| OPN4       | 0.8879 | 1.0547 | 0.9724 | 0.8357 | 0.9377 | 0.0481 |
| LOC286135  | 0.9541 | 0.9890 | 1.0083 | 0.7993 | 0.9377 | 0.0475 |
| LOC1001346 | 1.0553 | 0.9001 | 0.8435 | 0.9518 | 0.9377 | 0.0450 |
| LOC1001290 | 0.9356 | 1.0059 | 0.9283 | 0.8810 | 0.9377 | 0.0257 |
| C14orf72   | 0.9567 | 0.9221 | 1.0483 | 0.8238 | 0.9377 | 0.0464 |
| LOC1001301 | 0.7945 | 1.0363 | 1.0633 | 0.8567 | 0.9377 | 0.0662 |
| OR5K3      | 0.8914 | 1.0023 | 1.0006 | 0.8566 | 0.9377 | 0.0375 |
| LOC643719  | 0.8637 | 1.0562 | 0.8908 | 0.9401 | 0.9377 | 0.0425 |
| C11orf64   | 0.8882 | 1.0303 | 0.9730 | 0.8594 | 0.9377 | 0.0392 |
| SAC        | 0.8064 | 1.1262 | 1.0154 | 0.8029 | 0.9377 | 0.0801 |
| C10orf108  | 0.8828 | 1.0495 | 0.9970 | 0.8217 | 0.9377 | 0.0520 |
| IL17C      | 0.9434 | 1.0976 | 0.8235 | 0.8866 | 0.9377 | 0.0586 |
| C10orf73   | 0.9220 | 0.9519 | 1.0723 | 0.8048 | 0.9377 | 0.0550 |
| LOC727879  | 0.8758 | 1.0220 | 1.0388 | 0.8143 | 0.9377 | 0.0551 |
| C21orf128  | 0.8920 | 0.9543 | 1.0168 | 0.8879 | 0.9378 | 0.0304 |
| OR8J3      | 0.9019 | 1.0665 | 0.9315 | 0.8512 | 0.9378 | 0.0460 |
| SNORA19    | 0.9393 | 1.0741 | 0.9088 | 0.8289 | 0.9378 | 0.0511 |
| CYB5R2     | 0.9453 | 0.9900 | 0.9626 | 0.8532 | 0.9378 | 0.0296 |
| LOC646316  | 0.8018 | 1.0900 | 0.9991 | 0.8602 | 0.9378 | 0.0655 |
| OR10A5     | 0.8992 | 1.0452 | 0.8589 | 0.9479 | 0.9378 | 0.0402 |
| LOC441550  | 0.9360 | 1.0101 | 1.0920 | 0.7131 | 0.9378 | 0.0814 |
| ALOX12B    | 0.8421 | 1.0123 | 1.0549 | 0.8420 | 0.9378 | 0.0560 |
| C2orf52    | 0.8971 | 1.0738 | 0.9627 | 0.8176 | 0.9378 | 0.0542 |
| YWHAB      | 0.7883 | 1.1737 | 1.0725 | 0.7168 | 0.9378 | 0.1099 |
| ADAM12     | 0.9172 | 0.9973 | 0.9548 | 0.8820 | 0.9378 | 0.0248 |
| UTP20      | 0.9268 | 1.0793 | 0.9082 | 0.8371 | 0.9378 | 0.0510 |
| LOC727913  | 0.8098 | 1.0896 | 0.9658 | 0.8861 | 0.9378 | 0.0598 |
| GOLPH3L    | 0.9737 | 1.0813 | 0.9887 | 0.7078 | 0.9378 | 0.0803 |
| WNK3       | 0.8893 | 1.0200 | 0.9572 | 0.8849 | 0.9378 | 0.0320 |
| WIP1       | 0.8657 | 1.1005 | 0.9873 | 0.7978 | 0.9378 | 0.0669 |
| LIX1L      | 0.8247 | 1.1620 | 0.9791 | 0.7855 | 0.9378 | 0.0856 |
| LOC1001297 | 0.8654 | 0.9292 | 0.9961 | 0.9607 | 0.9378 | 0.0277 |
| RAB11FIP4  | 0.8738 | 1.1195 | 0.9283 | 0.8298 | 0.9378 | 0.0638 |
| RPL10A     | 0.7881 | 1.2176 | 0.9813 | 0.7644 | 0.9379 | 0.1051 |
| OR11H1     | 0.9199 | 1.0618 | 0.9990 | 0.7709 | 0.9379 | 0.0628 |
| LOC389740  | 0.8954 | 0.9057 | 1.0748 | 0.8756 | 0.9379 | 0.0461 |
| LOC392501  | 0.8644 | 1.0256 | 1.0058 | 0.8557 | 0.9379 | 0.0451 |
| LOC651319  | 0.9680 | 0.9516 | 0.9884 | 0.8435 | 0.9379 | 0.0324 |
| NINL       | 0.8515 | 1.0528 | 0.9212 | 0.9261 | 0.9379 | 0.0419 |
| ZBTB7B     | 0.9169 | 1.0122 | 1.0252 | 0.7973 | 0.9379 | 0.0527 |
| LOC650295  | 0.9651 | 1.0859 | 0.8245 | 0.8762 | 0.9379 | 0.0572 |
| LOC729766  | 0.8694 | 0.9890 | 0.9783 | 0.9150 | 0.9379 | 0.0281 |
| POU4F1     | 0.9041 | 0.9940 | 0.9400 | 0.9137 | 0.9379 | 0.0202 |
| RLN3       | 0.8445 | 0.9493 | 1.0487 | 0.9092 | 0.9379 | 0.0428 |
| LOC650901  | 0.9369 | 1.0410 | 0.9047 | 0.8692 | 0.9379 | 0.0370 |
| CAPN7      | 0.8544 | 1.1016 | 0.9355 | 0.8602 | 0.9379 | 0.0576 |

|            |        |        |        |        |        |        |
|------------|--------|--------|--------|--------|--------|--------|
| TDRD10     | 0.7733 | 1.0353 | 1.0116 | 0.9316 | 0.9379 | 0.0592 |
| LOC644988  | 1.0225 | 1.1483 | 0.9375 | 0.6437 | 0.9380 | 0.1072 |
| CYP4F8     | 0.9798 | 1.0161 | 0.8659 | 0.8901 | 0.9380 | 0.0358 |
| LOC1001330 | 0.8429 | 1.0406 | 1.0169 | 0.8515 | 0.9380 | 0.0527 |
| GCLC       | 1.0000 | 1.0166 | 0.9598 | 0.7757 | 0.9380 | 0.0554 |
| LOC647854  | 0.9178 | 0.9282 | 1.0244 | 0.8816 | 0.9380 | 0.0305 |
| ECM1       | 0.8805 | 1.0926 | 0.8901 | 0.8888 | 0.9380 | 0.0516 |
| GALNS      | 0.7805 | 1.0464 | 1.1388 | 0.7863 | 0.9380 | 0.0912 |
| GDEP       | 0.8512 | 0.9882 | 1.0085 | 0.9040 | 0.9380 | 0.0367 |
| FCER2      | 0.8723 | 1.0189 | 0.9309 | 0.9300 | 0.9380 | 0.0302 |
| LOC731109  | 0.8575 | 1.1571 | 1.0584 | 0.6791 | 0.9380 | 0.1064 |
| NLRP4      | 0.8452 | 1.0043 | 1.0031 | 0.8996 | 0.9380 | 0.0395 |
| TRIP12     | 0.8791 | 1.0209 | 1.1259 | 0.7261 | 0.9380 | 0.0869 |
| CFP        | 0.8162 | 1.0545 | 1.0180 | 0.8634 | 0.9380 | 0.0580 |
| SGK2       | 0.8721 | 1.0257 | 0.9846 | 0.8699 | 0.9381 | 0.0396 |
| C1QL2      | 0.8183 | 1.1683 | 0.9026 | 0.8631 | 0.9381 | 0.0786 |
| OSBP2      | 0.8817 | 1.0917 | 1.0093 | 0.7696 | 0.9381 | 0.0708 |
| LOC127099  | 0.8655 | 0.9898 | 1.0256 | 0.8713 | 0.9381 | 0.0409 |
| IRAK1BP1   | 0.9270 | 1.0352 | 0.9424 | 0.8477 | 0.9381 | 0.0385 |
| LOC441495  | 0.8871 | 1.0488 | 0.9189 | 0.8976 | 0.9381 | 0.0375 |
| GAS2L2     | 0.9437 | 1.0646 | 0.9764 | 0.7676 | 0.9381 | 0.0623 |
| LOC650321  | 0.8479 | 1.0977 | 0.9200 | 0.8868 | 0.9381 | 0.0552 |
| ZNF548     | 0.8725 | 1.1230 | 1.0044 | 0.7525 | 0.9381 | 0.0803 |
| FAM25C     | 0.8683 | 1.0463 | 1.1044 | 0.7335 | 0.9381 | 0.0847 |
| LOC642866  | 0.8855 | 1.0775 | 0.9438 | 0.8458 | 0.9381 | 0.0506 |
| LOC388946  | 0.8504 | 0.9763 | 0.9972 | 0.9286 | 0.9381 | 0.0326 |
| LOC646381  | 0.8174 | 1.0309 | 1.0718 | 0.8324 | 0.9381 | 0.0660 |
| SERPINF2   | 0.9566 | 1.0296 | 0.9712 | 0.7952 | 0.9381 | 0.0502 |
| LOC645410  | 0.9562 | 1.1303 | 0.8790 | 0.7870 | 0.9381 | 0.0728 |
| LOC648377  | 0.8847 | 0.9956 | 1.0136 | 0.8587 | 0.9381 | 0.0389 |
| LOC391013  | 0.8788 | 0.9978 | 1.0299 | 0.8460 | 0.9382 | 0.0447 |
| KCNH3      | 0.9937 | 0.8975 | 0.9972 | 0.8643 | 0.9382 | 0.0338 |
| PWRN1      | 0.9204 | 1.0092 | 0.9403 | 0.8828 | 0.9382 | 0.0265 |
| C20orf4    | 0.8503 | 1.2549 | 0.9048 | 0.7426 | 0.9382 | 0.1108 |
| LOC652889  | 0.8038 | 0.9766 | 1.0058 | 0.9666 | 0.9382 | 0.0456 |
| CRHR1      | 0.9369 | 1.0147 | 0.8818 | 0.9194 | 0.9382 | 0.0280 |
| LOC646011  | 0.8931 | 0.9162 | 1.1042 | 0.8393 | 0.9382 | 0.0576 |
| LOC442329  | 0.9114 | 0.9511 | 0.9638 | 0.9265 | 0.9382 | 0.0118 |
| C3orf24    | 0.9483 | 1.0215 | 0.8850 | 0.8980 | 0.9382 | 0.0310 |
| LOC642000  | 0.8863 | 1.0428 | 1.0027 | 0.8210 | 0.9382 | 0.0513 |
| LOC650538  | 0.9154 | 0.9531 | 1.1072 | 0.7771 | 0.9382 | 0.0679 |
| C6orf186   | 0.9072 | 0.9754 | 1.0139 | 0.8564 | 0.9382 | 0.0351 |
| MGC72104   | 0.8448 | 1.2865 | 0.9025 | 0.7192 | 0.9382 | 0.1222 |
| LOC154449  | 0.9023 | 0.9986 | 0.9293 | 0.9228 | 0.9382 | 0.0209 |
| C19orf75   | 0.7971 | 1.0302 | 1.0287 | 0.8970 | 0.9383 | 0.0565 |
| SGCD       | 0.9368 | 1.0059 | 0.9620 | 0.8483 | 0.9383 | 0.0332 |



|            |        |        |        |        |        |        |
|------------|--------|--------|--------|--------|--------|--------|
| NKAIN4     | 0.9838 | 0.9148 | 0.9635 | 0.8909 | 0.9383 | 0.0214 |
| SPG20      | 0.8342 | 1.1081 | 0.9007 | 0.9101 | 0.9383 | 0.0591 |
| LOC1001348 | 0.7991 | 1.1382 | 1.0223 | 0.7935 | 0.9383 | 0.0853 |
| LOC650562  | 0.8184 | 1.0439 | 0.9704 | 0.9204 | 0.9383 | 0.0473 |
| LOC441120  | 0.8829 | 0.9608 | 0.9806 | 0.9289 | 0.9383 | 0.0213 |
| LOC641761  | 1.0299 | 0.9848 | 0.9064 | 0.8320 | 0.9383 | 0.0437 |
| LOC645037  | 0.8293 | 1.1763 | 0.9570 | 0.7906 | 0.9383 | 0.0869 |
| LOC389786  | 0.8820 | 1.0215 | 0.9229 | 0.9268 | 0.9383 | 0.0295 |
| PTP4A2     | 0.7921 | 1.2038 | 0.9621 | 0.7952 | 0.9383 | 0.0970 |
| LOC642771  | 0.7311 | 1.2181 | 1.0017 | 0.8024 | 0.9383 | 0.1094 |
| ELOVL3     | 0.9224 | 0.9503 | 0.9608 | 0.9199 | 0.9383 | 0.0102 |
| LOC642738  | 0.8594 | 0.9772 | 1.1092 | 0.8075 | 0.9384 | 0.0671 |
| LOC642181  | 0.8595 | 1.0221 | 1.0246 | 0.8472 | 0.9384 | 0.0491 |
| MAPK14     | 0.8325 | 1.1246 | 0.9797 | 0.8166 | 0.9384 | 0.0721 |
| LOC340096  | 0.8401 | 0.9812 | 1.0123 | 0.9199 | 0.9384 | 0.0380 |
| LOC441811  | 0.8814 | 0.9747 | 1.0614 | 0.8360 | 0.9384 | 0.0502 |
| LOC1001321 | 0.8631 | 1.0374 | 0.9734 | 0.8797 | 0.9384 | 0.0410 |
| LOC401629  | 0.8527 | 1.0239 | 1.0062 | 0.8708 | 0.9384 | 0.0445 |
| HACE1      | 0.7973 | 1.1609 | 0.9661 | 0.8293 | 0.9384 | 0.0827 |
| LOC96597   | 0.9522 | 0.9265 | 1.0131 | 0.8619 | 0.9384 | 0.0313 |
| LOC388743  | 0.9218 | 1.0274 | 0.9403 | 0.8642 | 0.9384 | 0.0338 |
| LOC642749  | 0.8704 | 1.0954 | 0.9200 | 0.8679 | 0.9384 | 0.0537 |
| SLC12A1    | 0.9758 | 0.9415 | 0.9395 | 0.8969 | 0.9384 | 0.0162 |
| RNF6       | 0.8545 | 1.0523 | 1.0145 | 0.8325 | 0.9385 | 0.0556 |
| NEURL4     | 0.8842 | 1.0896 | 0.8558 | 0.9243 | 0.9385 | 0.0523 |
| ZNF676     | 0.9189 | 1.0378 | 0.9849 | 0.8123 | 0.9385 | 0.0486 |
| NOD2       | 0.9127 | 0.9510 | 0.9724 | 0.9177 | 0.9385 | 0.0141 |
| LOC643225  | 0.9759 | 1.0717 | 0.8420 | 0.8644 | 0.9385 | 0.0532 |
| S100A1     | 0.7538 | 1.0348 | 1.0523 | 0.9132 | 0.9385 | 0.0689 |
| LOC650241  | 0.7398 | 1.0890 | 0.9272 | 0.9980 | 0.9385 | 0.0740 |
| LOC641798  | 0.7780 | 1.1741 | 1.0506 | 0.7513 | 0.9385 | 0.1036 |
| FAM123B    | 0.8571 | 1.0691 | 0.9921 | 0.8357 | 0.9385 | 0.0556 |
| LOC440926  | 0.8474 | 1.1632 | 1.0081 | 0.7355 | 0.9385 | 0.0935 |
| LOC442208  | 0.9205 | 0.9653 | 1.0885 | 0.7798 | 0.9385 | 0.0637 |
| ERCC-00104 | 0.9882 | 0.9707 | 0.9746 | 0.8207 | 0.9385 | 0.0395 |
| LOC441632  | 0.8245 | 1.1284 | 0.9781 | 0.8231 | 0.9385 | 0.0730 |
| MTHFSD     | 0.9644 | 1.0600 | 0.8959 | 0.8339 | 0.9386 | 0.0485 |
| DNM2       | 0.9031 | 1.1563 | 0.9477 | 0.7472 | 0.9386 | 0.0843 |
| FAM155A    | 0.8735 | 1.0932 | 0.9391 | 0.8485 | 0.9386 | 0.0550 |
| PWWP2      | 0.8728 | 1.2200 | 0.8486 | 0.8130 | 0.9386 | 0.0946 |
| LOC645411  | 0.8754 | 1.0169 | 1.0659 | 0.7962 | 0.9386 | 0.0623 |
| CLTCL1     | 0.9033 | 1.0876 | 0.9137 | 0.8497 | 0.9386 | 0.0516 |
| LOC1001347 | 0.8899 | 1.0397 | 1.0120 | 0.8129 | 0.9386 | 0.0531 |
| SMCR7      | 0.9118 | 1.0853 | 0.9430 | 0.8144 | 0.9386 | 0.0560 |
| LOC1001341 | 0.9632 | 1.0011 | 0.9586 | 0.8315 | 0.9386 | 0.0369 |
| LOC1001333 | 0.9014 | 1.0914 | 0.9551 | 0.8065 | 0.9386 | 0.0595 |

|            |        |        |        |        |        |        |
|------------|--------|--------|--------|--------|--------|--------|
| CPNE6      | 0.8723 | 1.0132 | 0.9845 | 0.8846 | 0.9386 | 0.0353 |
| LOC647908  | 0.9643 | 1.0015 | 0.9304 | 0.8584 | 0.9387 | 0.0304 |
| LOC651745  | 0.7934 | 0.9976 | 1.0034 | 0.9603 | 0.9387 | 0.0494 |
| TMEM104    | 0.9244 | 1.0713 | 0.9247 | 0.8344 | 0.9387 | 0.0490 |
| TBC1D2     | 0.9716 | 1.0603 | 0.8612 | 0.8618 | 0.9387 | 0.0481 |
| TAS2R39    | 0.8126 | 1.0748 | 1.0253 | 0.8421 | 0.9387 | 0.0653 |
| TEAD3      | 0.8736 | 1.0496 | 0.9201 | 0.9116 | 0.9387 | 0.0383 |
| TOMM20L    | 0.8708 | 1.1015 | 0.9628 | 0.8198 | 0.9387 | 0.0618 |
| CCDC141    | 0.9007 | 1.0132 | 0.9781 | 0.8629 | 0.9387 | 0.0345 |
| CD24       | 1.0322 | 1.0417 | 0.9364 | 0.7447 | 0.9387 | 0.0689 |
| ZNF595     | 0.9255 | 0.9470 | 1.0557 | 0.8267 | 0.9387 | 0.0470 |
| FAM7A1     | 0.7801 | 1.1028 | 1.0431 | 0.8289 | 0.9387 | 0.0791 |
| LOC643982  | 0.9042 | 0.9717 | 0.9941 | 0.8851 | 0.9388 | 0.0262 |
| C1QTNF6    | 0.8953 | 1.0040 | 0.9785 | 0.8773 | 0.9388 | 0.0309 |
| TACR3      | 0.8701 | 1.1630 | 0.8167 | 0.9052 | 0.9388 | 0.0769 |
| CCL3       | 0.8156 | 0.9583 | 1.0685 | 0.9126 | 0.9388 | 0.0525 |
| FIGN       | 0.7699 | 1.0844 | 1.0426 | 0.8581 | 0.9388 | 0.0747 |
| FLJ25169   | 0.9603 | 1.0427 | 0.9838 | 0.7683 | 0.9388 | 0.0594 |
| LOC649192  | 0.8325 | 1.1287 | 0.9124 | 0.8815 | 0.9388 | 0.0654 |
| LOC729854  | 0.9585 | 1.0273 | 0.8872 | 0.8822 | 0.9388 | 0.0343 |
| MIRLET7F1  | 0.8478 | 1.0854 | 0.9753 | 0.8466 | 0.9388 | 0.0574 |
| POM121L10f | 0.8898 | 0.9523 | 1.0256 | 0.8874 | 0.9388 | 0.0326 |
| IHPK3      | 0.8693 | 0.8763 | 1.2132 | 0.7963 | 0.9388 | 0.0933 |
| ZMYND17    | 0.8236 | 0.9330 | 1.0184 | 0.9802 | 0.9388 | 0.0422 |
| SEMA3D     | 0.8951 | 1.0409 | 0.9427 | 0.8766 | 0.9388 | 0.0368 |
| LOC729663  | 0.9069 | 1.0276 | 0.9620 | 0.8588 | 0.9388 | 0.0363 |
| RUNX3      | 0.8561 | 1.0550 | 0.9930 | 0.8511 | 0.9388 | 0.0508 |
| NFKBIZ     | 0.9735 | 1.0665 | 0.8456 | 0.8697 | 0.9388 | 0.0508 |
| FLJ21865   | 0.7469 | 1.1610 | 0.9287 | 0.9187 | 0.9388 | 0.0850 |
| NOD1       | 0.8831 | 1.1668 | 0.9019 | 0.8036 | 0.9388 | 0.0789 |
| LOC642176  | 0.9643 | 0.9848 | 0.8840 | 0.9223 | 0.9388 | 0.0225 |
| LOC648287  | 0.9264 | 0.9671 | 0.9932 | 0.8687 | 0.9388 | 0.0271 |
| LOC651575  | 0.8769 | 1.0057 | 1.1010 | 0.7718 | 0.9388 | 0.0722 |
| CCDC96     | 0.7948 | 1.1429 | 1.0684 | 0.7494 | 0.9389 | 0.0979 |
| LOC1001326 | 0.8630 | 1.0599 | 0.9723 | 0.8604 | 0.9389 | 0.0480 |
| IFNAR1     | 0.9214 | 1.2538 | 0.8752 | 0.7052 | 0.9389 | 0.1148 |
| LOC1001337 | 0.8572 | 1.0401 | 1.0831 | 0.7753 | 0.9389 | 0.0733 |
| EMR2       | 0.8696 | 1.0466 | 0.9651 | 0.8745 | 0.9389 | 0.0421 |
| LOC642469  | 0.9543 | 0.9746 | 0.9136 | 0.9133 | 0.9390 | 0.0153 |
| LOC652655  | 0.9696 | 0.9926 | 0.9906 | 0.8030 | 0.9390 | 0.0456 |
| C1orf64    | 0.8684 | 1.0085 | 1.0403 | 0.8388 | 0.9390 | 0.0501 |
| NR2F1      | 0.7991 | 1.0301 | 1.0417 | 0.8850 | 0.9390 | 0.0587 |
| LOC647998  | 0.9096 | 0.9823 | 1.0074 | 0.8567 | 0.9390 | 0.0344 |
| LOC652563  | 1.0188 | 1.0474 | 0.8551 | 0.8347 | 0.9390 | 0.0548 |
| PGF        | 0.7970 | 1.0343 | 0.9888 | 0.9359 | 0.9390 | 0.0514 |
| RAET1K     | 0.8495 | 0.9898 | 1.0152 | 0.9016 | 0.9390 | 0.0385 |

|            |        |        |        |        |        |        |
|------------|--------|--------|--------|--------|--------|--------|
| C2orf89    | 0.9011 | 1.0391 | 0.9219 | 0.8940 | 0.9390 | 0.0339 |
| C4BPB      | 0.9271 | 1.0625 | 0.8672 | 0.8992 | 0.9390 | 0.0429 |
| LOC646561  | 0.8992 | 1.0959 | 0.9522 | 0.8088 | 0.9390 | 0.0601 |
| LOC643187  | 0.9327 | 1.1418 | 0.9199 | 0.7616 | 0.9390 | 0.0780 |
| LOC653060  | 0.9825 | 1.0315 | 0.8968 | 0.8454 | 0.9390 | 0.0418 |
| SH3PXD2A   | 0.8774 | 1.0696 | 0.9348 | 0.8743 | 0.9390 | 0.0457 |
| SEC61B     | 0.8592 | 1.1098 | 1.0897 | 0.6974 | 0.9390 | 0.0986 |
| DFNA5      | 0.9105 | 1.1501 | 0.8635 | 0.8321 | 0.9390 | 0.0722 |
| C6orf199   | 0.8491 | 1.0719 | 0.9483 | 0.8869 | 0.9390 | 0.0488 |
| REG3G      | 0.9202 | 0.9803 | 0.9579 | 0.8979 | 0.9390 | 0.0185 |
| LOC1001303 | 0.8571 | 1.0533 | 0.9557 | 0.8901 | 0.9391 | 0.0433 |
| LCMT1      | 0.8518 | 1.3356 | 0.9035 | 0.6653 | 0.9391 | 0.1418 |
| LOC731039  | 0.8747 | 1.1052 | 0.9070 | 0.8694 | 0.9391 | 0.0560 |
| SEC1       | 0.8742 | 1.1054 | 1.0009 | 0.7759 | 0.9391 | 0.0721 |
| T          | 0.8271 | 0.9821 | 1.0471 | 0.9001 | 0.9391 | 0.0479 |
| ACHE       | 0.9165 | 0.9985 | 0.9436 | 0.8979 | 0.9391 | 0.0219 |
| ANKRD38    | 0.8539 | 1.1094 | 0.9071 | 0.8862 | 0.9391 | 0.0578 |
| LOC400708  | 0.9438 | 1.0392 | 0.8736 | 0.9000 | 0.9391 | 0.0364 |
| LOC729421  | 0.7475 | 1.2592 | 0.9761 | 0.7739 | 0.9392 | 0.1183 |
| LOC1001333 | 0.8924 | 1.0472 | 0.9374 | 0.8797 | 0.9392 | 0.0381 |
| LOC651859  | 0.8287 | 1.0541 | 1.0145 | 0.8593 | 0.9392 | 0.0559 |
| C17orf49   | 1.0113 | 1.2307 | 0.8623 | 0.6523 | 0.9392 | 0.1219 |
| LOC652813  | 1.0004 | 1.0275 | 0.8766 | 0.8522 | 0.9392 | 0.0438 |
| LOC643684  | 0.9574 | 1.0174 | 0.9153 | 0.8666 | 0.9392 | 0.0320 |
| B3GALT6    | 0.9215 | 1.1852 | 0.9176 | 0.7324 | 0.9392 | 0.0931 |
| LOC1000497 | 0.7837 | 1.0893 | 1.0225 | 0.8613 | 0.9392 | 0.0705 |
| LOC650247  | 0.7969 | 1.1141 | 1.0403 | 0.8054 | 0.9392 | 0.0811 |
| LOC375010  | 0.8872 | 0.9038 | 1.0121 | 0.9537 | 0.9392 | 0.0281 |
| LOC648059  | 0.7050 | 1.0737 | 1.1211 | 0.8569 | 0.9392 | 0.0970 |
| LOC652605  | 0.8694 | 0.9966 | 0.9573 | 0.9335 | 0.9392 | 0.0266 |
| LOC650788  | 0.9113 | 1.0286 | 0.9441 | 0.8728 | 0.9392 | 0.0332 |
| POU6F1     | 0.8697 | 1.0169 | 0.9574 | 0.9128 | 0.9392 | 0.0315 |
| NBPF5      | 0.8974 | 1.0457 | 0.9582 | 0.8556 | 0.9392 | 0.0413 |
| LOC1001327 | 0.9400 | 0.9761 | 0.9712 | 0.8696 | 0.9392 | 0.0245 |
| SYT15      | 0.8238 | 1.0780 | 0.9899 | 0.8652 | 0.9392 | 0.0582 |
| LOC1001340 | 0.8441 | 0.9842 | 1.0866 | 0.8419 | 0.9392 | 0.0594 |
| FLJ42709   | 0.7948 | 1.0548 | 1.0389 | 0.8685 | 0.9393 | 0.0640 |
| EXOC1      | 0.9110 | 1.1605 | 0.9489 | 0.7367 | 0.9393 | 0.0870 |
| LOC1001294 | 0.8912 | 1.0818 | 0.8974 | 0.8868 | 0.9393 | 0.0475 |
| LOC727833  | 0.8469 | 1.0057 | 0.9889 | 0.9157 | 0.9393 | 0.0365 |
| FCGR2A     | 0.8744 | 1.0073 | 0.9714 | 0.9041 | 0.9393 | 0.0304 |
| LOC441873  | 0.8960 | 1.1161 | 0.9302 | 0.8150 | 0.9393 | 0.0637 |
| OR2T11     | 0.9389 | 0.8415 | 1.0576 | 0.9193 | 0.9393 | 0.0447 |
| CNFN       | 0.9669 | 1.0956 | 0.9232 | 0.7717 | 0.9393 | 0.0668 |
| LOC401845  | 0.9589 | 0.9170 | 1.0425 | 0.8390 | 0.9393 | 0.0424 |
| LINS1      | 0.8608 | 1.0962 | 1.0198 | 0.7806 | 0.9393 | 0.0721 |

|            |        |        |        |        |        |        |
|------------|--------|--------|--------|--------|--------|--------|
| CPEB1      | 0.9261 | 0.9965 | 0.9167 | 0.9181 | 0.9393 | 0.0192 |
| LOC647943  | 0.8753 | 1.0721 | 0.9330 | 0.8771 | 0.9394 | 0.0462 |
| SLC39A7    | 0.8827 | 0.9945 | 0.9592 | 0.9210 | 0.9394 | 0.0241 |
| PRRT3      | 0.7764 | 1.1779 | 1.0443 | 0.7589 | 0.9394 | 0.1029 |
| LOC440577  | 0.9268 | 1.1040 | 0.8599 | 0.8668 | 0.9394 | 0.0569 |
| LOC731157  | 0.8914 | 1.1140 | 0.9383 | 0.8138 | 0.9394 | 0.0636 |
| AGXT       | 0.9028 | 1.1192 | 0.9483 | 0.7872 | 0.9394 | 0.0689 |
| LOC1001336 | 0.8438 | 0.9437 | 0.9603 | 1.0097 | 0.9394 | 0.0348 |
| LOC731312  | 0.9136 | 0.9394 | 1.0108 | 0.8938 | 0.9394 | 0.0256 |
| LOC1001343 | 0.9723 | 1.0728 | 0.9413 | 0.7712 | 0.9394 | 0.0627 |
| DSCR8      | 0.8603 | 0.9942 | 1.0061 | 0.8971 | 0.9394 | 0.0359 |
| MIR453     | 0.8682 | 1.0310 | 0.9823 | 0.8761 | 0.9394 | 0.0401 |
| RTP2       | 0.8962 | 1.0211 | 0.9949 | 0.8454 | 0.9394 | 0.0413 |
| ITGB3      | 0.8986 | 0.9514 | 1.0354 | 0.8722 | 0.9394 | 0.0360 |
| LOC646750  | 0.9164 | 0.8845 | 1.0942 | 0.8625 | 0.9394 | 0.0528 |
| LOC642680  | 0.9171 | 0.9711 | 0.9326 | 0.9368 | 0.9394 | 0.0114 |
| TMEM131    | 0.8009 | 1.3594 | 0.8623 | 0.7351 | 0.9394 | 0.1424 |
| NXF5       | 0.8932 | 1.0497 | 0.9855 | 0.8294 | 0.9394 | 0.0488 |
| KLHL22     | 0.8769 | 1.3427 | 0.7541 | 0.7841 | 0.9395 | 0.1369 |
| AGXT2      | 0.8242 | 1.0257 | 1.0979 | 0.8101 | 0.9395 | 0.0722 |
| KIF9       | 0.9388 | 1.0717 | 0.9646 | 0.7828 | 0.9395 | 0.0596 |
| ODF3B      | 0.9049 | 1.0584 | 0.9644 | 0.8302 | 0.9395 | 0.0482 |
| CTGLF3     | 0.7914 | 1.3868 | 0.8452 | 0.7345 | 0.9395 | 0.1508 |
| MFSD6L     | 0.8575 | 1.2331 | 0.8821 | 0.7852 | 0.9395 | 0.1000 |
| ZC3H7A     | 0.8544 | 1.2969 | 0.8332 | 0.7734 | 0.9395 | 0.1204 |
| EFNB1      | 0.9042 | 1.0149 | 1.0193 | 0.8195 | 0.9395 | 0.0481 |
| SMARCA5    | 0.7949 | 1.0824 | 1.1803 | 0.7004 | 0.9395 | 0.1142 |
| KPTN       | 0.8240 | 1.0660 | 0.9971 | 0.8709 | 0.9395 | 0.0558 |
| PDE6H      | 0.8383 | 0.9630 | 0.9665 | 0.9902 | 0.9395 | 0.0343 |
| CCDC135    | 0.8729 | 1.0800 | 1.0325 | 0.7726 | 0.9395 | 0.0711 |
| STIM2      | 0.7558 | 1.1507 | 1.0593 | 0.7923 | 0.9395 | 0.0976 |
| LOC440518  | 0.8705 | 1.0819 | 0.9765 | 0.8293 | 0.9395 | 0.0567 |
| GPR44      | 0.8152 | 1.0485 | 1.0112 | 0.8832 | 0.9395 | 0.0545 |
| WFDC3      | 0.8986 | 1.0381 | 0.9535 | 0.8679 | 0.9395 | 0.0373 |
| EVC        | 0.8861 | 1.1458 | 0.8817 | 0.8446 | 0.9395 | 0.0694 |
| TGFBR1     | 0.9266 | 1.0174 | 0.9629 | 0.8513 | 0.9396 | 0.0348 |
| RAB40A     | 0.9869 | 0.9938 | 0.9463 | 0.8313 | 0.9396 | 0.0376 |
| LOC283584  | 0.8936 | 0.9934 | 0.9453 | 0.9259 | 0.9396 | 0.0209 |
| LOC1001308 | 0.9404 | 0.9915 | 0.9548 | 0.8717 | 0.9396 | 0.0250 |
| DIXDC1     | 0.8931 | 1.0284 | 0.9417 | 0.8951 | 0.9396 | 0.0317 |
| LOC649169  | 0.8223 | 1.0459 | 1.0902 | 0.7999 | 0.9396 | 0.0749 |
| FRMD3      | 0.8816 | 1.1192 | 0.9353 | 0.8223 | 0.9396 | 0.0642 |
| A2BP1      | 0.8900 | 1.0490 | 0.9801 | 0.8393 | 0.9396 | 0.0467 |
| LOC645688  | 0.7696 | 1.1186 | 1.1768 | 0.6934 | 0.9396 | 0.1217 |
| CASC4      | 0.7720 | 1.3475 | 0.8591 | 0.7798 | 0.9396 | 0.1374 |
| CAPN2      | 1.0259 | 1.0650 | 0.8847 | 0.7829 | 0.9396 | 0.0650 |

|            |        |        |        |        |        |        |
|------------|--------|--------|--------|--------|--------|--------|
| PLVAP      | 0.8892 | 1.0736 | 0.9490 | 0.8467 | 0.9396 | 0.0493 |
| LOXHD1     | 0.7316 | 1.1515 | 0.9676 | 0.9078 | 0.9396 | 0.0866 |
| LOC391817  | 0.9557 | 1.0715 | 0.8897 | 0.8417 | 0.9396 | 0.0498 |
| PRAMEF12   | 0.9112 | 1.0997 | 0.9532 | 0.7945 | 0.9396 | 0.0630 |
| LOC1001295 | 0.9461 | 0.9897 | 0.9625 | 0.8604 | 0.9397 | 0.0279 |
| AMELX      | 0.9138 | 1.0066 | 0.9087 | 0.9295 | 0.9397 | 0.0227 |
| STAC3      | 0.8691 | 1.0643 | 0.9645 | 0.8609 | 0.9397 | 0.0477 |
| COL13A1    | 0.8009 | 1.0748 | 1.0032 | 0.8798 | 0.9397 | 0.0613 |
| AIFM3      | 0.8682 | 1.0264 | 0.9708 | 0.8934 | 0.9397 | 0.0362 |
| RGPD8      | 0.7488 | 1.2962 | 0.9561 | 0.7577 | 0.9397 | 0.1281 |
| RMRP       | 0.8361 | 1.0162 | 1.0637 | 0.8428 | 0.9397 | 0.0587 |
| TMPRSS11E  | 0.8737 | 1.0337 | 0.9392 | 0.9123 | 0.9397 | 0.0341 |
| MIR206     | 0.9770 | 1.0590 | 0.9270 | 0.7958 | 0.9397 | 0.0551 |
| LOC729081  | 0.8451 | 1.0642 | 0.9215 | 0.9282 | 0.9397 | 0.0456 |
| LOC648763  | 0.7790 | 1.1252 | 0.9899 | 0.8648 | 0.9397 | 0.0755 |
| WDR24      | 0.9020 | 1.3249 | 0.8103 | 0.7218 | 0.9397 | 0.1336 |
| AQP6       | 0.8923 | 1.0175 | 0.9587 | 0.8905 | 0.9398 | 0.0304 |
| ARHGEF1    | 0.9117 | 1.0878 | 0.9102 | 0.8493 | 0.9398 | 0.0514 |
| LOC730392  | 0.7068 | 1.1396 | 1.0198 | 0.8930 | 0.9398 | 0.0926 |
| NARF       | 0.9517 | 1.3349 | 0.7937 | 0.6788 | 0.9398 | 0.1431 |
| LOC644424  | 0.9265 | 1.0297 | 1.0038 | 0.7990 | 0.9398 | 0.0518 |
| SIK1       | 0.9400 | 0.9859 | 0.9076 | 0.9257 | 0.9398 | 0.0167 |
| TBX6       | 0.8874 | 1.0864 | 0.8874 | 0.8979 | 0.9398 | 0.0489 |
| RAB34      | 0.9008 | 1.0814 | 0.9960 | 0.7811 | 0.9398 | 0.0645 |
| LOC728734  | 0.9114 | 1.1109 | 0.8443 | 0.8926 | 0.9398 | 0.0588 |
| FBXO34     | 0.7709 | 1.3918 | 0.9503 | 0.6463 | 0.9398 | 0.1631 |
| LOC646966  | 0.8103 | 1.0217 | 1.2374 | 0.6899 | 0.9398 | 0.1206 |
| LRRC67     | 0.9012 | 1.0075 | 0.9826 | 0.8680 | 0.9398 | 0.0330 |
| OR51E1     | 0.9171 | 1.0132 | 0.9488 | 0.8802 | 0.9398 | 0.0282 |
| LOC653495  | 0.8838 | 1.0254 | 0.9670 | 0.8831 | 0.9398 | 0.0347 |
| LOC652786  | 0.9016 | 0.9528 | 0.9428 | 0.9621 | 0.9398 | 0.0133 |
| LOC646508  | 0.8518 | 1.1940 | 0.9857 | 0.7278 | 0.9398 | 0.0997 |
| GCG        | 0.7094 | 1.1726 | 1.0582 | 0.8192 | 0.9398 | 0.1064 |
| LOC642082  | 0.9834 | 1.2082 | 0.8291 | 0.7387 | 0.9399 | 0.1027 |
| DNAJC19    | 0.7810 | 1.3530 | 0.9131 | 0.7123 | 0.9399 | 0.1439 |
| C16orf30   | 0.9658 | 0.9349 | 0.9891 | 0.8696 | 0.9399 | 0.0259 |
| LOC646653  | 0.9614 | 1.0111 | 0.9385 | 0.8484 | 0.9399 | 0.0340 |
| LOC732146  | 0.6413 | 1.1401 | 1.0300 | 0.9481 | 0.9399 | 0.1070 |
| LOC642269  | 0.8443 | 1.0582 | 1.0262 | 0.8308 | 0.9399 | 0.0595 |
| MBD2       | 0.8765 | 0.9961 | 1.0212 | 0.8657 | 0.9399 | 0.0401 |
| LOC646943  | 0.8788 | 1.1331 | 0.8958 | 0.8519 | 0.9399 | 0.0650 |
| SLC38A8    | 0.8619 | 1.0469 | 0.9902 | 0.8606 | 0.9399 | 0.0469 |
| MSGN1      | 0.8977 | 1.0203 | 0.9688 | 0.8728 | 0.9399 | 0.0336 |
| AHCYL2     | 0.8846 | 1.2195 | 0.8593 | 0.7962 | 0.9399 | 0.0950 |
| GP9        | 0.8866 | 0.9424 | 0.9855 | 0.9451 | 0.9399 | 0.0203 |
| LOC121838  | 0.9455 | 1.0610 | 0.8859 | 0.8673 | 0.9399 | 0.0437 |

|             |        |        |        |        |        |        |
|-------------|--------|--------|--------|--------|--------|--------|
| ARAP3       | 0.9668 | 1.0062 | 0.9511 | 0.8356 | 0.9399 | 0.0367 |
| LOC645276   | 0.9219 | 0.9401 | 1.0290 | 0.8687 | 0.9399 | 0.0333 |
| DCTN4       | 0.8343 | 1.2282 | 0.9814 | 0.7159 | 0.9399 | 0.1104 |
| C12orf35    | 0.9186 | 1.0820 | 0.9681 | 0.7911 | 0.9399 | 0.0603 |
| LOC339782   | 0.8306 | 1.0335 | 1.0428 | 0.8529 | 0.9399 | 0.0569 |
| SIGLEC5     | 0.8075 | 0.9928 | 1.0436 | 0.9159 | 0.9400 | 0.0514 |
| C19orf2     | 0.8357 | 1.1532 | 1.0724 | 0.6985 | 0.9400 | 0.1050 |
| SFRP1       | 0.9179 | 1.0269 | 0.9371 | 0.8779 | 0.9400 | 0.0315 |
| LOC727815   | 0.8830 | 1.0199 | 1.0078 | 0.8492 | 0.9400 | 0.0433 |
| LOC1001292  | 0.9741 | 1.0611 | 0.8971 | 0.8277 | 0.9400 | 0.0502 |
| LOC652894   | 0.9318 | 1.0423 | 0.9457 | 0.8403 | 0.9400 | 0.0413 |
| RPS28       | 0.6445 | 1.0728 | 1.3794 | 0.6634 | 0.9400 | 0.1767 |
| LOC402282   | 0.8675 | 1.0541 | 0.9582 | 0.8803 | 0.9400 | 0.0430 |
| OFD1        | 0.8052 | 1.2994 | 0.8256 | 0.8299 | 0.9400 | 0.1199 |
| LOC650861   | 0.8607 | 1.0678 | 0.9476 | 0.8841 | 0.9400 | 0.0464 |
| BRI3P1      | 0.7166 | 1.2088 | 1.1527 | 0.6821 | 0.9400 | 0.1396 |
| LOC652875   | 0.8334 | 0.9904 | 1.0442 | 0.8922 | 0.9400 | 0.0475 |
| MTA3        | 0.8939 | 1.3189 | 0.9501 | 0.5973 | 0.9401 | 0.1481 |
| LOC643226   | 0.8274 | 1.0363 | 1.0178 | 0.8787 | 0.9401 | 0.0514 |
| GLI1        | 0.8385 | 1.0908 | 0.9462 | 0.8848 | 0.9401 | 0.0549 |
| STXBP5      | 0.8806 | 1.0926 | 0.9981 | 0.7890 | 0.9401 | 0.0664 |
| DKFZP564J1C | 0.8042 | 1.0448 | 1.0028 | 0.9086 | 0.9401 | 0.0535 |
| CHRM5       | 0.9881 | 0.9059 | 0.9270 | 0.9395 | 0.9401 | 0.0174 |
| LOC648403   | 0.8342 | 1.1752 | 0.9224 | 0.8286 | 0.9401 | 0.0813 |
| LOC440944   | 0.8617 | 1.0172 | 1.0222 | 0.8595 | 0.9401 | 0.0459 |
| LOC649956   | 0.9633 | 0.9990 | 0.9429 | 0.8553 | 0.9401 | 0.0306 |
| LOC650174   | 0.9050 | 0.9234 | 1.0942 | 0.8379 | 0.9401 | 0.0545 |
| MPP2        | 0.8824 | 1.1814 | 0.9708 | 0.7259 | 0.9401 | 0.0950 |
| LOC729409   | 0.9175 | 1.0740 | 0.9383 | 0.8307 | 0.9401 | 0.0503 |
| TPO         | 0.9275 | 1.0143 | 0.9362 | 0.8826 | 0.9401 | 0.0274 |
| OR10AG1     | 0.8581 | 1.0304 | 1.0158 | 0.8564 | 0.9402 | 0.0480 |
| PSMA7       | 0.8525 | 1.0423 | 0.9461 | 0.9197 | 0.9402 | 0.0393 |
| LOC642356   | 0.8175 | 1.0843 | 0.9577 | 0.9012 | 0.9402 | 0.0560 |
| LOC1001300  | 0.9296 | 1.0213 | 0.9719 | 0.8379 | 0.9402 | 0.0389 |
| LOC653333   | 0.7969 | 1.3044 | 0.8555 | 0.8039 | 0.9402 | 0.1221 |
| LOC342918   | 0.9190 | 1.0442 | 0.8732 | 0.9242 | 0.9402 | 0.0365 |
| LOC1001319  | 0.8563 | 1.0500 | 0.9877 | 0.8668 | 0.9402 | 0.0472 |
| MYPN        | 0.8879 | 1.0896 | 0.9381 | 0.8452 | 0.9402 | 0.0533 |
| LOC643149   | 0.8679 | 1.0641 | 0.9669 | 0.8620 | 0.9402 | 0.0478 |
| MIR588      | 0.8186 | 0.9799 | 1.0048 | 0.9576 | 0.9402 | 0.0417 |
| LOC729639   | 0.7604 | 1.0922 | 1.0911 | 0.8172 | 0.9402 | 0.0882 |
| KRT4        | 0.8731 | 0.9407 | 0.9904 | 0.9567 | 0.9402 | 0.0247 |
| SDPR        | 0.8826 | 1.0085 | 1.0131 | 0.8566 | 0.9402 | 0.0411 |
| MYO10       | 0.8980 | 1.0671 | 1.0807 | 0.7150 | 0.9402 | 0.0858 |
| LOC150763   | 0.8898 | 1.0340 | 1.0110 | 0.8261 | 0.9402 | 0.0495 |
| LOC388885   | 0.7253 | 1.0280 | 1.0046 | 1.0030 | 0.9402 | 0.0719 |

|            |        |        |        |        |        |        |
|------------|--------|--------|--------|--------|--------|--------|
| TMPRSS12   | 0.8984 | 1.0989 | 0.9748 | 0.7889 | 0.9402 | 0.0652 |
| LOC728278  | 0.8668 | 1.0797 | 1.0036 | 0.8109 | 0.9402 | 0.0616 |
| EIF4E1B    | 0.9140 | 1.0409 | 1.0201 | 0.7860 | 0.9402 | 0.0584 |
| SLC15A1    | 0.8557 | 1.0624 | 0.9582 | 0.8847 | 0.9402 | 0.0461 |
| LRRK2      | 0.8859 | 0.9482 | 1.0475 | 0.8794 | 0.9402 | 0.0390 |
| NRIP1      | 0.8398 | 1.2395 | 0.9415 | 0.7402 | 0.9403 | 0.1079 |
| LOC1001326 | 0.6681 | 1.0763 | 1.4692 | 0.5474 | 0.9403 | 0.2095 |
| BTN2A1     | 0.8853 | 1.2196 | 0.9897 | 0.6665 | 0.9403 | 0.1149 |
| GBP2       | 0.7914 | 1.1837 | 0.9527 | 0.8333 | 0.9403 | 0.0880 |
| C4orf16    | 0.9304 | 1.0273 | 0.9334 | 0.8701 | 0.9403 | 0.0324 |
| RNF2       | 0.8943 | 0.9898 | 0.9326 | 0.9446 | 0.9403 | 0.0197 |
| LOC401817  | 0.9381 | 1.0303 | 1.0228 | 0.7701 | 0.9403 | 0.0605 |
| STH        | 0.8729 | 0.9350 | 0.9777 | 0.9757 | 0.9403 | 0.0245 |
| INPP4A     | 0.8597 | 1.0510 | 0.9573 | 0.8932 | 0.9403 | 0.0421 |
| LOC728637  | 0.8824 | 0.9969 | 1.0424 | 0.8396 | 0.9403 | 0.0475 |
| FILIP1     | 0.8051 | 1.0867 | 0.9561 | 0.9133 | 0.9403 | 0.0582 |
| FAM150B    | 0.8814 | 1.0120 | 0.9642 | 0.9038 | 0.9403 | 0.0296 |
| LOC1001289 | 0.7311 | 1.0936 | 1.2577 | 0.6790 | 0.9403 | 0.1403 |
| LOC1001286 | 0.9409 | 0.9749 | 0.8930 | 0.9527 | 0.9403 | 0.0173 |
| GRIK3      | 0.8295 | 1.1177 | 0.9222 | 0.8920 | 0.9404 | 0.0622 |
| SULT1A3    | 0.8956 | 1.1032 | 0.9323 | 0.8303 | 0.9404 | 0.0582 |
| ANKRD7     | 0.9449 | 1.0518 | 0.9358 | 0.8291 | 0.9404 | 0.0455 |
| LOC1001331 | 0.8007 | 1.1199 | 0.8410 | 0.9999 | 0.9404 | 0.0737 |
| LOC649246  | 0.9782 | 1.0607 | 0.8990 | 0.8236 | 0.9404 | 0.0510 |
| LOC645203  | 0.7688 | 1.0523 | 1.0942 | 0.8463 | 0.9404 | 0.0788 |
| LOC1001312 | 0.9067 | 0.9991 | 0.9977 | 0.8581 | 0.9404 | 0.0349 |
| SLC26A4    | 0.9498 | 1.0028 | 0.9414 | 0.8676 | 0.9404 | 0.0278 |
| FLJ45721   | 0.9479 | 1.0786 | 0.8738 | 0.8614 | 0.9404 | 0.0499 |
| WBSCR17    | 0.8547 | 1.0993 | 0.9610 | 0.8466 | 0.9404 | 0.0590 |
| C11orf59   | 0.7936 | 1.2586 | 0.9613 | 0.7481 | 0.9404 | 0.1156 |
| LOC643821  | 0.8903 | 1.0522 | 0.9691 | 0.8501 | 0.9404 | 0.0447 |
| LOC1001327 | 0.8424 | 0.9512 | 1.0475 | 0.9205 | 0.9404 | 0.0424 |
| LOC134466  | 0.7703 | 1.1197 | 1.0334 | 0.8384 | 0.9404 | 0.0817 |
| ZGPAT      | 0.8348 | 1.1385 | 0.9656 | 0.8228 | 0.9404 | 0.0735 |
| LOC650845  | 0.9244 | 0.9577 | 0.9926 | 0.8871 | 0.9404 | 0.0226 |
| LOC645744  | 0.9241 | 0.9587 | 1.0025 | 0.8764 | 0.9404 | 0.0267 |
| NEUROD2    | 0.8949 | 1.0343 | 0.9829 | 0.8497 | 0.9404 | 0.0417 |
| LOC652456  | 0.6909 | 0.7750 | 1.1845 | 1.1114 | 0.9405 | 0.1219 |
| FAM26A     | 0.9296 | 0.8925 | 0.9621 | 0.9777 | 0.9405 | 0.0189 |
| SNORD18A   | 0.7741 | 1.1017 | 0.9913 | 0.8948 | 0.9405 | 0.0697 |
| ALS2       | 0.7823 | 1.3314 | 0.8570 | 0.7913 | 0.9405 | 0.1314 |
| PSKH2      | 0.9019 | 1.0016 | 0.9058 | 0.9525 | 0.9405 | 0.0234 |
| LOC650852  | 1.0501 | 0.9630 | 0.8442 | 0.9046 | 0.9405 | 0.0439 |
| LOC646422  | 0.9331 | 0.9131 | 0.9887 | 0.9270 | 0.9405 | 0.0166 |
| KIAA1462   | 0.8533 | 1.0238 | 0.9235 | 0.9616 | 0.9405 | 0.0357 |
| WDR38      | 0.8690 | 1.0462 | 0.9853 | 0.8616 | 0.9405 | 0.0452 |

|            |        |        |        |        |        |        |
|------------|--------|--------|--------|--------|--------|--------|
| PSG2       | 0.8858 | 1.0779 | 0.9216 | 0.8768 | 0.9405 | 0.0468 |
| STOML3     | 0.8497 | 1.0638 | 0.8864 | 0.9622 | 0.9405 | 0.0473 |
| TUBB2B     | 0.9659 | 0.9443 | 0.9511 | 0.9008 | 0.9405 | 0.0140 |
| FAM153B    | 0.8868 | 1.0121 | 0.9280 | 0.9352 | 0.9405 | 0.0261 |
| ELN        | 0.9473 | 0.9700 | 0.9409 | 0.9039 | 0.9405 | 0.0137 |
| LOC729602  | 0.8931 | 0.9746 | 1.0189 | 0.8755 | 0.9405 | 0.0339 |
| PRPF4B     | 0.8535 | 1.0711 | 0.9770 | 0.8607 | 0.9405 | 0.0519 |
| MAZ        | 0.8515 | 1.1420 | 0.9496 | 0.8192 | 0.9405 | 0.0726 |
| KIAA2010   | 0.7494 | 1.2561 | 0.9580 | 0.7987 | 0.9406 | 0.1142 |
| LOC390975  | 0.8436 | 1.0569 | 1.0139 | 0.8479 | 0.9406 | 0.0555 |
| GDPD5      | 0.9531 | 0.9808 | 1.0037 | 0.8247 | 0.9406 | 0.0400 |
| UROD       | 0.8780 | 1.1488 | 1.0599 | 0.6755 | 0.9406 | 0.1048 |
| IL21       | 0.8083 | 0.9803 | 1.0497 | 0.9240 | 0.9406 | 0.0510 |
| LOC643634  | 0.8641 | 1.0919 | 0.9138 | 0.8926 | 0.9406 | 0.0514 |
| LOC644037  | 0.8852 | 0.9637 | 1.0610 | 0.8525 | 0.9406 | 0.0464 |
| LOC652071  | 0.8869 | 1.0436 | 1.0568 | 0.7751 | 0.9406 | 0.0673 |
| LOC728116  | 0.8858 | 0.9854 | 0.9780 | 0.9133 | 0.9406 | 0.0244 |
| LOC1001333 | 0.9010 | 1.0645 | 0.9810 | 0.8160 | 0.9406 | 0.0533 |
| LOC440131  | 0.8716 | 1.0883 | 0.9268 | 0.8760 | 0.9406 | 0.0508 |
| NCRNA00158 | 0.8520 | 1.0364 | 0.9650 | 0.9094 | 0.9407 | 0.0394 |
| IGSF9B     | 0.9113 | 1.0591 | 0.9311 | 0.8612 | 0.9407 | 0.0421 |
| C20orf199  | 0.8400 | 1.2782 | 0.8747 | 0.7700 | 0.9407 | 0.1146 |
| LOC645402  | 0.9651 | 1.0154 | 0.8576 | 0.9249 | 0.9407 | 0.0333 |
| LOC728498  | 0.9516 | 0.9712 | 0.9909 | 0.8493 | 0.9407 | 0.0315 |
| LOC643817  | 0.7934 | 0.9829 | 1.0327 | 0.9540 | 0.9407 | 0.0517 |
| HCG4       | 0.9060 | 1.0462 | 1.0009 | 0.8099 | 0.9407 | 0.0525 |
| MMP24      | 1.0153 | 1.0131 | 0.9716 | 0.7630 | 0.9408 | 0.0601 |
| SLC6A18    | 0.8826 | 1.0817 | 0.9574 | 0.8414 | 0.9408 | 0.0528 |
| FLJ36492   | 0.8737 | 0.9703 | 0.9989 | 0.9201 | 0.9408 | 0.0277 |
| PPYR1      | 0.9119 | 0.9628 | 0.9773 | 0.9110 | 0.9408 | 0.0172 |
| AMIGO2     | 0.7084 | 1.0328 | 1.1040 | 0.9178 | 0.9408 | 0.0864 |
| LOC1001298 | 0.9531 | 1.0682 | 0.8956 | 0.8461 | 0.9408 | 0.0478 |
| LOC650482  | 0.8211 | 1.1092 | 1.0340 | 0.7988 | 0.9408 | 0.0772 |
| FLJ16126   | 0.9251 | 1.0363 | 0.9002 | 0.9015 | 0.9408 | 0.0323 |
| LOC730833  | 0.8469 | 1.0188 | 0.9685 | 0.9289 | 0.9408 | 0.0363 |
| LOC1001321 | 0.9276 | 1.0326 | 0.8750 | 0.9279 | 0.9408 | 0.0330 |
| LCE2C      | 0.8017 | 0.9937 | 1.0222 | 0.9456 | 0.9408 | 0.0490 |
| FLJ31945   | 0.9354 | 1.0252 | 0.9018 | 0.9009 | 0.9408 | 0.0293 |
| PCBD2      | 0.9010 | 1.0820 | 0.9214 | 0.8589 | 0.9408 | 0.0488 |
| OPN3       | 0.9495 | 1.0079 | 0.9396 | 0.8662 | 0.9408 | 0.0291 |
| C19orf38   | 0.8230 | 1.1383 | 0.8390 | 0.9631 | 0.9408 | 0.0729 |
| ATG16L1    | 0.9467 | 1.1943 | 0.8739 | 0.7485 | 0.9408 | 0.0939 |
| LOC1001299 | 0.9055 | 1.0860 | 1.0375 | 0.7344 | 0.9408 | 0.0787 |
| LOC653885  | 0.8696 | 1.0673 | 0.9642 | 0.8623 | 0.9408 | 0.0481 |
| C14orf45   | 0.8767 | 1.0744 | 0.9990 | 0.8133 | 0.9409 | 0.0589 |
| LOC643195  | 0.8552 | 1.2081 | 0.8635 | 0.8366 | 0.9409 | 0.0893 |



|            |        |        |        |        |        |        |
|------------|--------|--------|--------|--------|--------|--------|
| C1orf201   | 0.8125 | 0.9074 | 1.1358 | 0.9078 | 0.9409 | 0.0687 |
| LOC654256  | 0.9251 | 1.0815 | 0.9561 | 0.8008 | 0.9409 | 0.0576 |
| CPO        | 0.9088 | 1.0670 | 0.9290 | 0.8587 | 0.9409 | 0.0446 |
| LOC651386  | 0.9067 | 0.9879 | 1.0181 | 0.8508 | 0.9409 | 0.0381 |
| LOC641785  | 0.8395 | 1.1440 | 1.0170 | 0.7631 | 0.9409 | 0.0861 |
| RNU1F1     | 0.9437 | 1.1380 | 0.9008 | 0.7812 | 0.9409 | 0.0742 |
| ZNF205     | 0.9418 | 1.1037 | 0.9011 | 0.8170 | 0.9409 | 0.0602 |
| MTNR1A     | 0.8203 | 1.0401 | 1.0040 | 0.8995 | 0.9409 | 0.0501 |
| FAM5B      | 0.9594 | 1.0574 | 0.8942 | 0.8528 | 0.9410 | 0.0446 |
| OR6M1      | 0.8982 | 0.9890 | 0.9733 | 0.9033 | 0.9410 | 0.0234 |
| TDO2       | 0.8839 | 1.0407 | 0.9620 | 0.8773 | 0.9410 | 0.0384 |
| DICER1     | 0.7915 | 1.1165 | 0.9923 | 0.8635 | 0.9410 | 0.0717 |
| TTC7B      | 0.9557 | 1.0015 | 0.9270 | 0.8797 | 0.9410 | 0.0256 |
| LOC643899  | 0.8366 | 0.9549 | 1.0606 | 0.9120 | 0.9410 | 0.0468 |
| PSMB11     | 0.9152 | 0.8742 | 1.0103 | 0.9644 | 0.9410 | 0.0295 |
| LOC647834  | 0.9494 | 1.1215 | 0.9248 | 0.7683 | 0.9410 | 0.0723 |
| ZNF48      | 0.8987 | 1.0423 | 0.9787 | 0.8443 | 0.9410 | 0.0436 |
| LOC646019  | 0.9002 | 0.9308 | 0.9895 | 0.9436 | 0.9410 | 0.0186 |
| LOC652699  | 0.9463 | 1.0023 | 0.8302 | 0.9853 | 0.9410 | 0.0388 |
| FLJ45983   | 0.8969 | 1.0477 | 0.8883 | 0.9312 | 0.9410 | 0.0368 |
| LOC643509  | 0.9148 | 1.2714 | 0.9058 | 0.6722 | 0.9410 | 0.1236 |
| ACBD5      | 0.8336 | 1.1372 | 0.9630 | 0.8303 | 0.9410 | 0.0723 |
| MC4R       | 1.0061 | 0.8373 | 0.9605 | 0.9603 | 0.9410 | 0.0362 |
| LOC391504  | 1.0020 | 0.9663 | 0.9680 | 0.8279 | 0.9411 | 0.0386 |
| DHRS8      | 0.9102 | 0.9159 | 1.0347 | 0.9034 | 0.9411 | 0.0313 |
| KIAA1107   | 1.0457 | 1.0483 | 0.8784 | 0.7918 | 0.9411 | 0.0637 |
| DOC2A      | 0.8433 | 1.1157 | 0.9347 | 0.8705 | 0.9411 | 0.0613 |
| NLRP6      | 0.9274 | 0.9494 | 0.9372 | 0.9502 | 0.9411 | 0.0054 |
| C9orf36    | 0.8615 | 0.9885 | 1.0544 | 0.8599 | 0.9411 | 0.0483 |
| LOC442388  | 0.8621 | 0.9775 | 1.1140 | 0.8107 | 0.9411 | 0.0674 |
| COBL       | 0.9212 | 1.3944 | 0.8146 | 0.6341 | 0.9411 | 0.1623 |
| SECTM1     | 0.9700 | 0.9383 | 0.9748 | 0.8812 | 0.9411 | 0.0215 |
| OR4F16     | 0.9364 | 0.9614 | 0.9798 | 0.8867 | 0.9411 | 0.0202 |
| TCL6       | 0.9421 | 1.0284 | 0.9525 | 0.8414 | 0.9411 | 0.0384 |
| TDRG1      | 0.9035 | 1.0213 | 0.8819 | 0.9577 | 0.9411 | 0.0311 |
| RNASE13    | 0.9513 | 1.0760 | 0.9928 | 0.7443 | 0.9411 | 0.0705 |
| SEPSECS    | 0.8777 | 1.2036 | 0.9084 | 0.7747 | 0.9411 | 0.0920 |
| EIF3B      | 0.8007 | 1.3525 | 0.9128 | 0.6985 | 0.9411 | 0.1439 |
| LOC1001287 | 0.8909 | 0.9385 | 0.9960 | 0.9390 | 0.9411 | 0.0215 |
| C10orf62   | 0.9536 | 1.0213 | 0.9336 | 0.8559 | 0.9411 | 0.0340 |
| LOC643047  | 0.9019 | 1.0002 | 0.8545 | 1.0080 | 0.9412 | 0.0376 |
| ANO3       | 0.8343 | 1.0392 | 0.9724 | 0.9188 | 0.9412 | 0.0433 |
| APBB3      | 0.8244 | 1.2838 | 0.8953 | 0.7612 | 0.9412 | 0.1175 |
| SNORD69    | 0.7691 | 1.2955 | 0.9530 | 0.7471 | 0.9412 | 0.1268 |
| PARP3      | 0.9199 | 1.1170 | 0.9445 | 0.7833 | 0.9412 | 0.0685 |
| TFAP2E     | 0.9486 | 1.0076 | 0.9873 | 0.8213 | 0.9412 | 0.0418 |

|            |        |        |        |        |        |        |
|------------|--------|--------|--------|--------|--------|--------|
| HEATR4     | 0.8615 | 1.0749 | 1.0078 | 0.8206 | 0.9412 | 0.0600 |
| LOC1001333 | 0.9124 | 1.0692 | 0.8666 | 0.9166 | 0.9412 | 0.0441 |
| LOC644790  | 0.6785 | 1.1566 | 1.1790 | 0.7508 | 0.9412 | 0.1317 |
| SNORA20    | 0.8827 | 1.0256 | 1.0014 | 0.8551 | 0.9412 | 0.0424 |
| AP4B1      | 0.8487 | 1.3099 | 0.9565 | 0.6498 | 0.9412 | 0.1383 |
| SOCS5      | 0.8737 | 1.0908 | 1.0585 | 0.7419 | 0.9412 | 0.0818 |
| TMEM151B   | 0.9224 | 1.0731 | 0.8679 | 0.9016 | 0.9412 | 0.0454 |
| C12orf54   | 0.8132 | 0.9518 | 0.9766 | 1.0233 | 0.9412 | 0.0452 |
| DEFB106A   | 0.8242 | 1.1247 | 0.8916 | 0.9245 | 0.9412 | 0.0646 |
| SERPINB1   | 0.8528 | 0.9998 | 1.0156 | 0.8968 | 0.9412 | 0.0395 |
| LOC651789  | 0.9571 | 0.9625 | 0.9360 | 0.9094 | 0.9412 | 0.0121 |
| LOC1001316 | 0.9377 | 1.0674 | 0.8958 | 0.8641 | 0.9413 | 0.0447 |
| KCNH2      | 0.9182 | 1.0509 | 0.9343 | 0.8616 | 0.9413 | 0.0397 |
| SVIL       | 0.9156 | 1.0832 | 0.9439 | 0.8224 | 0.9413 | 0.0540 |
| WFDC10B    | 0.8532 | 1.0310 | 0.9927 | 0.8880 | 0.9413 | 0.0421 |
| LOC646438  | 0.8716 | 0.9725 | 1.0130 | 0.9079 | 0.9413 | 0.0317 |
| RFWD2      | 0.8385 | 1.1872 | 1.0524 | 0.6869 | 0.9413 | 0.1111 |
| MLLT3      | 0.7936 | 1.1210 | 0.9635 | 0.8870 | 0.9413 | 0.0692 |
| LOC731075  | 0.9852 | 1.0104 | 0.9321 | 0.8375 | 0.9413 | 0.0383 |
| RHOT1      | 0.7698 | 1.3084 | 0.9242 | 0.7627 | 0.9413 | 0.1279 |
| LOC642387  | 0.9241 | 1.0101 | 0.9542 | 0.8768 | 0.9413 | 0.0279 |
| LOC644165  | 0.8407 | 1.0705 | 0.9432 | 0.9109 | 0.9413 | 0.0481 |
| LOC401447  | 0.8155 | 1.0226 | 0.9929 | 0.9342 | 0.9413 | 0.0458 |
| LOC653349  | 0.9514 | 0.9902 | 0.9753 | 0.8484 | 0.9413 | 0.0320 |
| C6orf146   | 0.9503 | 0.9880 | 0.9536 | 0.8733 | 0.9413 | 0.0242 |
| SIPA1      | 0.9341 | 1.1526 | 0.8885 | 0.7901 | 0.9413 | 0.0766 |
| LOC652831  | 0.8943 | 0.9955 | 1.0004 | 0.8750 | 0.9413 | 0.0330 |
| LOC642160  | 0.9092 | 1.0212 | 0.9489 | 0.8860 | 0.9413 | 0.0296 |
| RARA       | 0.8170 | 1.1832 | 0.9410 | 0.8241 | 0.9413 | 0.0855 |
| C12orf55   | 1.0033 | 0.9423 | 0.9515 | 0.8684 | 0.9414 | 0.0278 |
| LOC652871  | 0.9140 | 0.9733 | 0.9811 | 0.8971 | 0.9414 | 0.0210 |
| AQP10      | 0.9543 | 0.9274 | 1.0029 | 0.8810 | 0.9414 | 0.0255 |
| CNOT3      | 0.8867 | 1.1546 | 0.9364 | 0.7878 | 0.9414 | 0.0775 |
| LOC1001342 | 0.9123 | 1.0523 | 0.9464 | 0.8545 | 0.9414 | 0.0416 |
| LOC1001335 | 0.9226 | 0.9087 | 1.1308 | 0.8034 | 0.9414 | 0.0685 |
| LOC441178  | 0.9276 | 1.0197 | 0.9209 | 0.8975 | 0.9414 | 0.0269 |
| PARVG      | 0.8323 | 1.1271 | 1.0230 | 0.7833 | 0.9414 | 0.0806 |
| LOC1001308 | 0.9317 | 0.9506 | 0.9423 | 0.9412 | 0.9414 | 0.0039 |
| INTS2      | 0.8957 | 1.0910 | 1.0038 | 0.7753 | 0.9414 | 0.0683 |
| TRIM42     | 0.8208 | 1.1283 | 0.9571 | 0.8596 | 0.9414 | 0.0686 |
| C11orf55   | 0.8224 | 1.0529 | 1.0058 | 0.8847 | 0.9415 | 0.0532 |
| TNRC4      | 0.8649 | 0.9986 | 0.9849 | 0.9175 | 0.9415 | 0.0311 |
| LOC1001308 | 0.9994 | 0.9425 | 0.9752 | 0.8488 | 0.9415 | 0.0330 |
| OR6P1      | 0.8197 | 1.0038 | 1.0607 | 0.8816 | 0.9415 | 0.0552 |
| R3HCC1     | 1.0235 | 1.1205 | 0.9903 | 0.6316 | 0.9415 | 0.1069 |
| RAD17      | 0.9729 | 1.1254 | 0.8210 | 0.8466 | 0.9415 | 0.0697 |

|            |        |        |        |        |        |        |
|------------|--------|--------|--------|--------|--------|--------|
| ZNF552     | 0.8429 | 0.9885 | 1.0929 | 0.8416 | 0.9415 | 0.0611 |
| ST3GAL6    | 0.9790 | 1.0605 | 0.8999 | 0.8266 | 0.9415 | 0.0504 |
| LOC647306  | 0.7578 | 1.0537 | 1.0236 | 0.9309 | 0.9415 | 0.0666 |
| PHLDA1     | 0.7612 | 1.1626 | 0.9811 | 0.8612 | 0.9415 | 0.0863 |
| ACBD3      | 0.8939 | 1.2025 | 0.9816 | 0.6881 | 0.9415 | 0.1065 |
| LOC1001337 | 0.7943 | 0.8942 | 0.9272 | 1.1504 | 0.9415 | 0.0751 |
| AHRR       | 0.9003 | 0.9585 | 0.9541 | 0.9534 | 0.9415 | 0.0138 |
| LOC389634  | 0.9881 | 0.9943 | 0.9319 | 0.8519 | 0.9415 | 0.0330 |
| BAG1       | 0.9077 | 1.0438 | 0.9328 | 0.8818 | 0.9416 | 0.0356 |
| SNORD113-2 | 0.9524 | 1.0332 | 0.8117 | 0.9690 | 0.9416 | 0.0467 |
| GAS6       | 0.8616 | 1.0750 | 0.9707 | 0.8591 | 0.9416 | 0.0515 |
| LOC1001297 | 0.9332 | 0.9395 | 1.0297 | 0.8639 | 0.9416 | 0.0340 |
| DPY19L2P1  | 0.8755 | 1.0765 | 0.9215 | 0.8929 | 0.9416 | 0.0460 |
| HTR7P      | 0.8488 | 1.1174 | 0.8926 | 0.9076 | 0.9416 | 0.0599 |
| HOXB5      | 0.8486 | 1.1938 | 0.8681 | 0.8559 | 0.9416 | 0.0841 |
| LOC728147  | 0.8635 | 1.2156 | 0.8864 | 0.8010 | 0.9416 | 0.0931 |
| LOC255620  | 0.8950 | 1.0216 | 0.9515 | 0.8984 | 0.9416 | 0.0296 |
| NPW        | 1.0314 | 1.0381 | 0.9095 | 0.7876 | 0.9416 | 0.0592 |
| MIR548P    | 0.9506 | 1.0234 | 1.0077 | 0.7849 | 0.9416 | 0.0545 |
| RTP4       | 0.8536 | 0.9625 | 1.0277 | 0.9228 | 0.9416 | 0.0365 |
| LOC1001328 | 1.0206 | 0.9150 | 0.9815 | 0.8495 | 0.9416 | 0.0376 |
| CYorf15B   | 0.8169 | 1.0911 | 1.0085 | 0.8501 | 0.9416 | 0.0650 |
| LOC651933  | 0.8527 | 1.0313 | 0.9546 | 0.9281 | 0.9416 | 0.0369 |
| LOC729698  | 0.9183 | 1.0560 | 0.9874 | 0.8049 | 0.9416 | 0.0535 |
| RCP9       | 0.9171 | 1.1406 | 0.9415 | 0.7674 | 0.9417 | 0.0767 |
| LOC729668  | 0.8135 | 1.0965 | 1.0501 | 0.8066 | 0.9417 | 0.0766 |
| LOC653536  | 0.8675 | 1.0207 | 1.0214 | 0.8571 | 0.9417 | 0.0459 |
| LOC642276  | 0.9740 | 1.1258 | 0.8951 | 0.7717 | 0.9417 | 0.0742 |
| LOC1001298 | 0.8437 | 1.1683 | 0.8216 | 0.9331 | 0.9417 | 0.0793 |
| RFX6       | 0.8896 | 1.1065 | 0.9331 | 0.8375 | 0.9417 | 0.0583 |
| MIR548M    | 0.9704 | 0.9868 | 0.9577 | 0.8518 | 0.9417 | 0.0306 |
| LOC1001327 | 0.8013 | 1.1907 | 1.0563 | 0.7185 | 0.9417 | 0.1098 |
| PRSS21     | 0.8472 | 1.0818 | 0.9526 | 0.8851 | 0.9417 | 0.0516 |
| C1orf86    | 0.8511 | 1.2239 | 0.9522 | 0.7396 | 0.9417 | 0.1036 |
| LOC441237  | 0.7936 | 1.0542 | 0.9916 | 0.9274 | 0.9417 | 0.0557 |
| IL1B       | 0.9335 | 0.9722 | 0.9916 | 0.8695 | 0.9417 | 0.0269 |
| FLJ38969   | 0.8645 | 0.9670 | 1.1102 | 0.8252 | 0.9417 | 0.0636 |
| LOC728351  | 1.0879 | 0.9825 | 0.9109 | 0.7855 | 0.9417 | 0.0635 |
| RNF216     | 0.7938 | 1.1490 | 1.0238 | 0.8003 | 0.9417 | 0.0874 |
| LOC646537  | 0.9147 | 0.9944 | 1.0754 | 0.7824 | 0.9417 | 0.0624 |
| CD1B       | 0.8286 | 1.1023 | 0.9959 | 0.8402 | 0.9418 | 0.0657 |
| UNQ6975    | 0.8901 | 0.9324 | 1.0525 | 0.8920 | 0.9418 | 0.0382 |
| TCTN2      | 0.9296 | 0.8882 | 1.0108 | 0.9384 | 0.9418 | 0.0255 |
| SCARNA2    | 0.9723 | 0.9622 | 0.9593 | 0.8733 | 0.9418 | 0.0230 |
| TMEM215    | 0.8357 | 1.0554 | 1.0240 | 0.8521 | 0.9418 | 0.0570 |
| LOC196993  | 0.8410 | 1.1172 | 0.8965 | 0.9125 | 0.9418 | 0.0604 |

|            |        |        |        |        |        |        |
|------------|--------|--------|--------|--------|--------|--------|
| LOC652491  | 0.8460 | 1.1931 | 0.9368 | 0.7912 | 0.9418 | 0.0890 |
| LOC285548  | 0.9630 | 1.0119 | 0.9890 | 0.8033 | 0.9418 | 0.0472 |
| TPBG       | 0.8034 | 1.1756 | 0.9337 | 0.8545 | 0.9418 | 0.0824 |
| ADAT3      | 0.7028 | 1.0574 | 1.2763 | 0.7308 | 0.9418 | 0.1375 |
| ASTN1      | 0.8719 | 1.0016 | 0.9880 | 0.9057 | 0.9418 | 0.0315 |
| ANGPT4     | 0.8880 | 0.9760 | 0.9597 | 0.9436 | 0.9418 | 0.0191 |
| LOC389394  | 0.9661 | 1.0202 | 0.9622 | 0.8189 | 0.9418 | 0.0431 |
| NUDT22     | 0.8761 | 1.1134 | 0.9538 | 0.8241 | 0.9418 | 0.0631 |
| LOC653053  | 0.9131 | 0.9436 | 0.9313 | 0.9794 | 0.9419 | 0.0140 |
| LOC1001281 | 1.0197 | 1.0294 | 0.8754 | 0.8429 | 0.9419 | 0.0482 |
| LOC651315  | 1.0416 | 0.8493 | 0.9952 | 0.8813 | 0.9419 | 0.0457 |
| LOC643453  | 0.8477 | 0.9524 | 1.0756 | 0.8917 | 0.9419 | 0.0495 |
| LOC1001338 | 0.7842 | 1.0742 | 1.0607 | 0.8483 | 0.9419 | 0.0737 |
| FBXL21     | 0.9051 | 1.1400 | 0.8892 | 0.8332 | 0.9419 | 0.0678 |
| FBXL7      | 0.8764 | 1.0579 | 0.9595 | 0.8737 | 0.9419 | 0.0435 |
| OR52E2     | 0.8608 | 0.9860 | 1.0823 | 0.8385 | 0.9419 | 0.0570 |
| LOC400750  | 0.8738 | 1.0788 | 0.9383 | 0.8768 | 0.9419 | 0.0480 |
| LOC201140  | 0.8370 | 1.0363 | 0.9863 | 0.9081 | 0.9419 | 0.0438 |
| LOC441119  | 0.8739 | 1.0705 | 1.0011 | 0.8222 | 0.9419 | 0.0570 |
| GOPC       | 0.9138 | 1.0747 | 1.0363 | 0.7429 | 0.9419 | 0.0747 |
| RABGAP1L   | 0.8015 | 1.0598 | 1.0327 | 0.8738 | 0.9420 | 0.0622 |
| LOC439992  | 0.9075 | 0.9923 | 0.9650 | 0.9031 | 0.9420 | 0.0219 |
| FGFBP1     | 0.9053 | 0.9550 | 0.9685 | 0.9391 | 0.9420 | 0.0136 |
| LOC643416  | 0.8777 | 1.0203 | 1.0176 | 0.8523 | 0.9420 | 0.0447 |
| LOC441009  | 0.6768 | 1.1003 | 0.9922 | 0.9986 | 0.9420 | 0.0918 |
| MSH5       | 0.8873 | 1.0793 | 0.9698 | 0.8316 | 0.9420 | 0.0539 |
| LOC648706  | 0.8445 | 1.0959 | 0.9259 | 0.9016 | 0.9420 | 0.0541 |
| SF4        | 0.9136 | 1.1220 | 0.9209 | 0.8114 | 0.9420 | 0.0650 |
| IL17RD     | 0.8342 | 1.0953 | 1.0316 | 0.8070 | 0.9420 | 0.0715 |
| CD70       | 0.8509 | 1.1581 | 0.9160 | 0.8429 | 0.9420 | 0.0739 |
| ERCC-00157 | 0.9784 | 1.2000 | 0.7818 | 0.8079 | 0.9420 | 0.0964 |
| URB1       | 0.9392 | 1.1400 | 0.8487 | 0.8402 | 0.9420 | 0.0697 |
| MIR301A    | 0.8619 | 0.9760 | 1.0048 | 0.9254 | 0.9420 | 0.0313 |
| NTSR2      | 0.8977 | 1.0068 | 0.9807 | 0.8829 | 0.9420 | 0.0305 |
| LRRC38     | 0.7978 | 1.0972 | 1.0633 | 0.8098 | 0.9421 | 0.0801 |
| ADAM32     | 0.8788 | 1.0627 | 0.9857 | 0.8409 | 0.9421 | 0.0506 |
| LOC644714  | 0.8858 | 1.0076 | 0.9480 | 0.9268 | 0.9421 | 0.0254 |
| TBN        | 1.0379 | 1.0219 | 0.8474 | 0.8611 | 0.9421 | 0.0509 |
| LOC650008  | 0.9224 | 0.9836 | 1.0141 | 0.8482 | 0.9421 | 0.0366 |
| MIR760     | 0.8349 | 1.0658 | 1.0838 | 0.7838 | 0.9421 | 0.0774 |
| GAS5       | 0.8970 | 1.0783 | 0.9505 | 0.8426 | 0.9421 | 0.0504 |
| LOC653226  | 0.8623 | 1.2342 | 0.9398 | 0.7320 | 0.9421 | 0.1064 |
| IL22       | 0.8767 | 1.1055 | 0.9412 | 0.8449 | 0.9421 | 0.0580 |
| LOC727963  | 0.8743 | 1.1038 | 0.9777 | 0.8126 | 0.9421 | 0.0638 |
| LOC728064  | 0.8613 | 1.0467 | 0.9472 | 0.9133 | 0.9421 | 0.0391 |
| HNRNPUL2   | 0.9086 | 1.3438 | 0.8353 | 0.6808 | 0.9421 | 0.1421 |

|            |        |        |        |        |        |        |
|------------|--------|--------|--------|--------|--------|--------|
| MYCN       | 0.9160 | 0.9573 | 0.9724 | 0.9228 | 0.9421 | 0.0136 |
| LOC1001324 | 0.8958 | 1.0290 | 0.9704 | 0.8733 | 0.9421 | 0.0356 |
| EREG       | 0.8512 | 1.1241 | 1.0098 | 0.7835 | 0.9421 | 0.0770 |
| SEL1L      | 0.8597 | 1.1083 | 1.0098 | 0.7908 | 0.9421 | 0.0718 |
| LALBA      | 0.9085 | 0.9269 | 1.0184 | 0.9148 | 0.9422 | 0.0257 |
| LOC1001335 | 0.8552 | 1.0157 | 1.0176 | 0.8802 | 0.9422 | 0.0433 |
| HS3ST3A1   | 0.8452 | 1.0223 | 0.9676 | 0.9337 | 0.9422 | 0.0371 |
| MBNL1      | 0.8043 | 1.1505 | 1.0823 | 0.7316 | 0.9422 | 0.1026 |
| IMPG2      | 0.9079 | 1.0175 | 1.0152 | 0.8281 | 0.9422 | 0.0458 |
| LOC388276  | 0.8569 | 0.9530 | 1.0790 | 0.8800 | 0.9422 | 0.0500 |
| LOC728866  | 0.9129 | 1.0265 | 0.9282 | 0.9014 | 0.9422 | 0.0286 |
| MRPS10     | 0.8230 | 1.3504 | 0.9837 | 0.6118 | 0.9422 | 0.1559 |
| NEIL1      | 0.7819 | 1.1716 | 0.9492 | 0.8662 | 0.9422 | 0.0837 |
| LOC649143  | 0.8739 | 1.0593 | 0.9916 | 0.8440 | 0.9422 | 0.0504 |
| MANBAL     | 0.8286 | 1.1407 | 0.9663 | 0.8332 | 0.9422 | 0.0735 |
| B3GNT2     | 0.7016 | 1.3640 | 0.9570 | 0.7462 | 0.9422 | 0.1512 |
| LOC388922  | 0.7913 | 1.0611 | 0.9824 | 0.9341 | 0.9422 | 0.0567 |
| LOC653722  | 0.7975 | 1.0840 | 0.9294 | 0.9580 | 0.9422 | 0.0588 |
| ZNF673     | 1.0301 | 1.0401 | 0.8876 | 0.8112 | 0.9422 | 0.0559 |
| CCDC88A    | 0.9565 | 1.0546 | 0.8846 | 0.8732 | 0.9422 | 0.0417 |
| LOC648980  | 0.9243 | 1.1984 | 0.9472 | 0.6991 | 0.9422 | 0.1021 |
| MGC10981   | 0.9251 | 0.9786 | 0.9830 | 0.8821 | 0.9422 | 0.0240 |
| LOC1001300 | 0.9183 | 0.9939 | 0.9418 | 0.9150 | 0.9422 | 0.0182 |
| PLD4       | 0.8995 | 1.0318 | 1.0231 | 0.8145 | 0.9422 | 0.0522 |
| SLC25A3    | 0.7761 | 1.2419 | 1.0157 | 0.7353 | 0.9423 | 0.1175 |
| LOC654235  | 0.8947 | 1.1224 | 0.8894 | 0.8625 | 0.9423 | 0.0605 |
| LOC727880  | 0.9078 | 0.9927 | 0.9426 | 0.9259 | 0.9423 | 0.0182 |
| LOC728877  | 0.9684 | 1.3256 | 0.8723 | 0.6027 | 0.9423 | 0.1494 |
| LOC441016  | 0.8735 | 1.1152 | 0.8986 | 0.8817 | 0.9423 | 0.0579 |
| CCL27      | 0.9217 | 1.0088 | 0.9957 | 0.8429 | 0.9423 | 0.0383 |
| HLA-DPB2   | 0.8120 | 1.0929 | 0.8912 | 0.9731 | 0.9423 | 0.0600 |
| LOC442465  | 0.9796 | 1.0675 | 0.8920 | 0.8301 | 0.9423 | 0.0518 |
| LOC642073  | 0.8847 | 0.9337 | 1.0667 | 0.8840 | 0.9423 | 0.0431 |
| LOC541472  | 0.8430 | 1.0606 | 0.9839 | 0.8817 | 0.9423 | 0.0494 |
| LOC1001289 | 0.8903 | 1.0623 | 0.9398 | 0.8768 | 0.9423 | 0.0422 |
| LOC727797  | 0.7974 | 1.2409 | 0.9136 | 0.8174 | 0.9423 | 0.1027 |
| LOC728153  | 0.9311 | 1.2342 | 0.8475 | 0.7566 | 0.9423 | 0.1036 |
| LOC727860  | 0.8883 | 0.9450 | 0.9979 | 0.9382 | 0.9424 | 0.0224 |
| TRIM5      | 0.8435 | 1.2573 | 0.8970 | 0.7716 | 0.9424 | 0.1081 |
| OR5B17     | 0.9618 | 0.9885 | 0.9572 | 0.8619 | 0.9424 | 0.0277 |
| LOC1001345 | 0.7321 | 1.0903 | 1.1531 | 0.7939 | 0.9424 | 0.1051 |
| GPR111     | 0.9146 | 1.0060 | 1.0189 | 0.8300 | 0.9424 | 0.0441 |
| MOXD2      | 0.8824 | 1.0880 | 0.9528 | 0.8464 | 0.9424 | 0.0533 |
| LOC1001343 | 0.9570 | 1.0643 | 0.9831 | 0.7651 | 0.9424 | 0.0634 |
| GPR107     | 0.9084 | 1.0449 | 1.0004 | 0.8157 | 0.9424 | 0.0509 |
| LOC651680  | 0.9084 | 0.9951 | 1.0023 | 0.8637 | 0.9424 | 0.0338 |

|            |        |        |        |        |        |        |
|------------|--------|--------|--------|--------|--------|--------|
| LOC647819  | 0.8318 | 1.0567 | 1.0443 | 0.8368 | 0.9424 | 0.0625 |
| CDC42EP3   | 0.7423 | 1.2348 | 0.9891 | 0.8033 | 0.9424 | 0.1107 |
| HIST1H3I   | 0.8931 | 0.9984 | 0.8821 | 0.9960 | 0.9424 | 0.0317 |
| MIR759     | 0.9177 | 0.9483 | 0.9444 | 0.9592 | 0.9424 | 0.0088 |
| WNT16      | 0.8586 | 1.0447 | 0.9647 | 0.9017 | 0.9424 | 0.0404 |
| SLIT1      | 0.9386 | 0.9744 | 0.9729 | 0.8838 | 0.9424 | 0.0212 |
| CALN1      | 0.8830 | 1.0726 | 0.9946 | 0.8195 | 0.9424 | 0.0565 |
| CCDC6      | 0.7402 | 1.2156 | 0.9275 | 0.8865 | 0.9425 | 0.0995 |
| RIBC1      | 0.9117 | 1.0461 | 0.9485 | 0.8635 | 0.9425 | 0.0387 |
| REG1P      | 0.7999 | 1.0744 | 0.9334 | 0.9622 | 0.9425 | 0.0564 |
| LOC650706  | 0.9658 | 0.9951 | 0.9064 | 0.9027 | 0.9425 | 0.0227 |
| CSGALNACT2 | 0.7052 | 1.1972 | 0.9672 | 0.9003 | 0.9425 | 0.1015 |
| TNR        | 0.8885 | 1.0288 | 0.9516 | 0.9011 | 0.9425 | 0.0318 |
| GPN2       | 0.6965 | 1.4031 | 0.9214 | 0.7491 | 0.9425 | 0.1609 |
| LOC653464  | 0.8973 | 1.0188 | 0.9261 | 0.9279 | 0.9425 | 0.0264 |
| ABCA8      | 0.9118 | 1.0467 | 0.9185 | 0.8932 | 0.9425 | 0.0351 |
| TMF1       | 0.7910 | 1.1401 | 1.0000 | 0.8390 | 0.9425 | 0.0796 |
| CCRL2      | 0.9031 | 0.9953 | 1.0651 | 0.8067 | 0.9425 | 0.0561 |
| PRSS3      | 0.9882 | 0.9558 | 0.9230 | 0.9031 | 0.9425 | 0.0187 |
| PLEKHH2    | 0.8781 | 0.9720 | 1.0051 | 0.9150 | 0.9425 | 0.0284 |
| LOC1001281 | 0.8935 | 1.1222 | 0.9157 | 0.8389 | 0.9425 | 0.0620 |
| MIR548F1   | 0.9390 | 0.9620 | 0.9968 | 0.8724 | 0.9426 | 0.0262 |
| LOC654249  | 0.8848 | 0.9449 | 1.0537 | 0.8869 | 0.9426 | 0.0396 |
| LOC646236  | 0.8397 | 1.1174 | 0.9668 | 0.8463 | 0.9426 | 0.0652 |
| LOC1001318 | 0.8448 | 0.9930 | 0.9389 | 0.9936 | 0.9426 | 0.0350 |
| MIR1913    | 0.9567 | 0.9519 | 0.8855 | 0.9763 | 0.9426 | 0.0198 |
| ZCCHC7     | 0.8487 | 1.1338 | 1.0644 | 0.7234 | 0.9426 | 0.0950 |
| TDRD5      | 1.0142 | 1.0661 | 0.8997 | 0.7903 | 0.9426 | 0.0615 |
| CNO        | 0.7880 | 1.2408 | 1.0089 | 0.7327 | 0.9426 | 0.1159 |
| LOC649318  | 0.9779 | 0.9309 | 0.9522 | 0.9093 | 0.9426 | 0.0147 |
| SH3GL1     | 0.7499 | 1.1985 | 1.0054 | 0.8166 | 0.9426 | 0.1010 |
| LOC643502  | 0.9259 | 1.0547 | 0.9285 | 0.8613 | 0.9426 | 0.0405 |
| LOC644830  | 0.9111 | 1.0548 | 0.9476 | 0.8569 | 0.9426 | 0.0418 |
| LOC652803  | 0.9221 | 1.0026 | 1.0615 | 0.7842 | 0.9426 | 0.0600 |
| OR10H1     | 0.9142 | 1.0829 | 0.9948 | 0.7786 | 0.9426 | 0.0646 |
| PKDCC      | 0.8192 | 1.0642 | 0.9754 | 0.9117 | 0.9426 | 0.0517 |
| LOC391039  | 0.8645 | 1.0709 | 0.9879 | 0.8472 | 0.9426 | 0.0530 |
| LOC1001285 | 0.8617 | 1.0249 | 0.9505 | 0.9334 | 0.9426 | 0.0335 |
| LOC1001306 | 0.9282 | 1.0209 | 0.8640 | 0.9575 | 0.9426 | 0.0326 |
| MFAP3L     | 0.8448 | 1.0682 | 0.9833 | 0.8743 | 0.9426 | 0.0514 |
| FAM45B     | 1.0349 | 1.0527 | 0.8993 | 0.7838 | 0.9427 | 0.0631 |
| IQCH       | 0.9155 | 1.0065 | 0.9687 | 0.8801 | 0.9427 | 0.0280 |
| ZNF718     | 0.8662 | 1.1469 | 0.9560 | 0.8016 | 0.9427 | 0.0751 |
| GUCY1B2    | 0.8763 | 1.0241 | 0.9571 | 0.9132 | 0.9427 | 0.0318 |
| MIR572     | 0.8356 | 1.1108 | 0.9460 | 0.8785 | 0.9427 | 0.0605 |
| COL4A4     | 0.7999 | 1.0371 | 0.9896 | 0.9442 | 0.9427 | 0.0513 |

|            |        |        |        |        |        |        |
|------------|--------|--------|--------|--------|--------|--------|
| XKR3       | 0.9362 | 0.9808 | 0.9750 | 0.8789 | 0.9427 | 0.0235 |
| MIR372     | 0.9740 | 0.9521 | 0.9349 | 0.9099 | 0.9427 | 0.0135 |
| LOC727987  | 0.9539 | 0.8888 | 1.0310 | 0.8972 | 0.9427 | 0.0328 |
| LIN28      | 0.9007 | 0.9625 | 0.9909 | 0.9169 | 0.9428 | 0.0207 |
| KIAA1109   | 1.0110 | 0.9512 | 0.9111 | 0.8978 | 0.9428 | 0.0254 |
| LOC645138  | 0.7321 | 1.2301 | 1.2702 | 0.5387 | 0.9428 | 0.1820 |
| MIR451     | 0.9591 | 0.8986 | 0.9026 | 1.0107 | 0.9428 | 0.0265 |
| PTH1R      | 0.9029 | 1.0232 | 1.0047 | 0.8403 | 0.9428 | 0.0432 |
| LOC285735  | 0.9659 | 0.9832 | 0.9838 | 0.8383 | 0.9428 | 0.0351 |
| ZNF569     | 0.8864 | 0.9610 | 1.0385 | 0.8853 | 0.9428 | 0.0365 |
| RPTOR      | 0.8388 | 1.0173 | 1.0680 | 0.8470 | 0.9428 | 0.0586 |
| LOC642278  | 0.8924 | 1.0966 | 0.9035 | 0.8787 | 0.9428 | 0.0515 |
| VPS11      | 0.9236 | 1.1080 | 0.8908 | 0.8488 | 0.9428 | 0.0572 |
| LOC1001291 | 0.8885 | 1.0759 | 0.9620 | 0.8448 | 0.9428 | 0.0505 |
| C2orf48    | 0.8310 | 1.0079 | 0.9860 | 0.9464 | 0.9428 | 0.0394 |
| MED29      | 0.9169 | 1.2282 | 0.9166 | 0.7095 | 0.9428 | 0.1070 |
| TARSL2     | 0.9264 | 1.2536 | 0.8284 | 0.7628 | 0.9428 | 0.1089 |
| C3orf22    | 0.8453 | 1.0239 | 0.9910 | 0.9111 | 0.9428 | 0.0402 |
| COX16      | 0.9149 | 1.0628 | 0.9394 | 0.8542 | 0.9428 | 0.0438 |
| LOC1001295 | 0.9083 | 1.0170 | 1.0438 | 0.8023 | 0.9428 | 0.0553 |
| ASB17      | 0.8922 | 0.9931 | 0.9525 | 0.9337 | 0.9428 | 0.0209 |
| WDR35      | 0.8297 | 1.0798 | 1.0057 | 0.8562 | 0.9429 | 0.0599 |
| STX6       | 0.8386 | 1.3659 | 0.8488 | 0.7182 | 0.9429 | 0.1441 |
| SNORA34    | 0.8503 | 1.0605 | 0.9861 | 0.8746 | 0.9429 | 0.0491 |
| CLDN4      | 0.9317 | 0.9741 | 0.9741 | 0.8915 | 0.9429 | 0.0198 |
| FLT3       | 0.8362 | 1.2000 | 0.9253 | 0.8100 | 0.9429 | 0.0892 |
| LOC729373  | 0.8690 | 0.9561 | 0.9985 | 0.9479 | 0.9429 | 0.0270 |
| ENPP4      | 0.7766 | 1.2375 | 0.9889 | 0.7685 | 0.9429 | 0.1107 |
| ARSI       | 0.9235 | 1.0332 | 0.9587 | 0.8563 | 0.9429 | 0.0368 |
| LOC644204  | 0.9061 | 0.9555 | 1.0539 | 0.8561 | 0.9429 | 0.0422 |
| LOC731419  | 0.8961 | 0.9793 | 1.0483 | 0.8480 | 0.9429 | 0.0444 |
| DDI1       | 0.8591 | 1.0459 | 0.9339 | 0.9326 | 0.9429 | 0.0385 |
| STMN4      | 0.8347 | 1.1131 | 0.9544 | 0.8693 | 0.9429 | 0.0621 |
| KRT13      | 0.8625 | 1.0771 | 0.9498 | 0.8822 | 0.9429 | 0.0485 |
| ID2        | 0.8667 | 1.1823 | 1.0341 | 0.6886 | 0.9429 | 0.1065 |
| LOC644917  | 0.9867 | 1.0058 | 0.9557 | 0.8236 | 0.9429 | 0.0411 |
| SPTBN1     | 0.8618 | 1.0183 | 1.0605 | 0.8311 | 0.9429 | 0.0567 |
| LOC1001329 | 0.8587 | 1.0357 | 0.9700 | 0.9073 | 0.9429 | 0.0384 |
| C19orf39   | 0.9221 | 1.0133 | 0.9051 | 0.9312 | 0.9429 | 0.0241 |
| CTAGE6     | 0.8591 | 1.1060 | 1.0024 | 0.8043 | 0.9429 | 0.0685 |
| LOC650298  | 0.8459 | 1.1096 | 1.0746 | 0.7417 | 0.9429 | 0.0890 |
| TNFRSF10C  | 0.8438 | 0.9990 | 0.9188 | 1.0102 | 0.9429 | 0.0388 |
| LOC1001319 | 0.8280 | 1.0740 | 0.9953 | 0.8745 | 0.9429 | 0.0561 |
| C1orf125   | 0.8044 | 1.0805 | 0.9516 | 0.9353 | 0.9429 | 0.0565 |
| LOC388900  | 0.8490 | 1.0885 | 0.9764 | 0.8580 | 0.9430 | 0.0565 |
| FAM19A1    | 0.9782 | 1.0060 | 1.0768 | 0.7110 | 0.9430 | 0.0801 |

|            |        |        |        |        |        |        |
|------------|--------|--------|--------|--------|--------|--------|
| SLC10A7    | 0.8207 | 1.2843 | 0.9072 | 0.7597 | 0.9430 | 0.1177 |
| RPL35      | 0.8515 | 0.9315 | 1.0658 | 0.9231 | 0.9430 | 0.0447 |
| LOC1001322 | 0.9267 | 1.2919 | 0.7799 | 0.7735 | 0.9430 | 0.1216 |
| KLHL33     | 0.9485 | 1.0276 | 0.9390 | 0.8569 | 0.9430 | 0.0349 |
| DNM1L      | 0.7513 | 1.2306 | 1.0637 | 0.7264 | 0.9430 | 0.1228 |
| WNK2       | 0.9339 | 1.0264 | 1.0209 | 0.7909 | 0.9430 | 0.0549 |
| LOC647347  | 0.9993 | 0.9997 | 0.8989 | 0.8743 | 0.9430 | 0.0330 |
| C5orf36    | 0.9078 | 1.0334 | 0.9813 | 0.8496 | 0.9430 | 0.0404 |
| SNORD114-3 | 0.8087 | 1.0712 | 0.9869 | 0.9053 | 0.9430 | 0.0561 |
| HMX2       | 0.9088 | 1.0437 | 0.9830 | 0.8367 | 0.9431 | 0.0449 |
| GSTM5      | 0.9491 | 0.9963 | 0.9420 | 0.8849 | 0.9431 | 0.0228 |
| LOC441792  | 0.9195 | 1.0448 | 0.9329 | 0.8751 | 0.9431 | 0.0361 |
| LOC1001283 | 0.9435 | 1.0533 | 0.9272 | 0.8483 | 0.9431 | 0.0422 |
| UBR3       | 0.8596 | 1.3827 | 0.7929 | 0.7371 | 0.9431 | 0.1487 |
| LOC285577  | 0.8710 | 1.0461 | 0.9884 | 0.8669 | 0.9431 | 0.0444 |
| LOC645333  | 0.8725 | 1.0490 | 1.0213 | 0.8295 | 0.9431 | 0.0542 |
| VIT        | 0.9206 | 0.9963 | 0.9343 | 0.9212 | 0.9431 | 0.0180 |
| LOC131185  | 0.9319 | 1.0044 | 0.9617 | 0.8745 | 0.9431 | 0.0273 |
| LOC729324  | 0.7259 | 1.4044 | 0.9980 | 0.6442 | 0.9431 | 0.1714 |
| LOC652882  | 0.9209 | 0.9020 | 0.9773 | 0.9723 | 0.9431 | 0.0187 |
| CMYA5      | 0.8647 | 1.0102 | 1.0274 | 0.8701 | 0.9431 | 0.0439 |
| RBP4       | 0.8676 | 1.0841 | 0.9817 | 0.8391 | 0.9431 | 0.0562 |
| MT1P2      | 0.9253 | 0.9925 | 0.9928 | 0.8619 | 0.9431 | 0.0314 |
| MGC51338   | 0.8975 | 0.9374 | 1.0135 | 0.9242 | 0.9431 | 0.0249 |
| IGFN1      | 0.9468 | 0.9652 | 0.9810 | 0.8796 | 0.9431 | 0.0223 |
| LOC1001332 | 0.9161 | 0.9583 | 1.0544 | 0.8438 | 0.9432 | 0.0440 |
| TRNAU1AP   | 0.9919 | 1.0412 | 0.8832 | 0.8564 | 0.9432 | 0.0439 |
| MIR221     | 0.8670 | 1.0144 | 1.0077 | 0.8836 | 0.9432 | 0.0394 |
| LOC1001339 | 0.8941 | 1.0612 | 0.9085 | 0.9089 | 0.9432 | 0.0395 |
| CALHM2     | 0.6923 | 1.2298 | 0.9878 | 0.8630 | 0.9432 | 0.1131 |
| C14orf38   | 0.7610 | 1.0980 | 1.0262 | 0.8875 | 0.9432 | 0.0748 |
| HIST1H4A   | 0.8791 | 1.0194 | 0.9553 | 0.9192 | 0.9432 | 0.0298 |
| ABP1       | 0.9351 | 0.9537 | 0.9250 | 0.9591 | 0.9432 | 0.0080 |
| CHRNA10    | 0.9112 | 1.0058 | 0.9291 | 0.9268 | 0.9432 | 0.0212 |
| TTLL12     | 0.8252 | 1.2954 | 0.9237 | 0.7287 | 0.9432 | 0.1239 |
| LOC1001320 | 1.0035 | 0.9731 | 0.9838 | 0.8125 | 0.9432 | 0.0440 |
| LOC728037  | 1.1166 | 1.0572 | 0.8973 | 0.7018 | 0.9432 | 0.0929 |
| APOL6      | 0.9240 | 1.0405 | 0.9696 | 0.8389 | 0.9432 | 0.0422 |
| SIRPB1     | 0.8915 | 0.9785 | 0.9419 | 0.9610 | 0.9432 | 0.0188 |
| LOC1001315 | 0.9525 | 1.0332 | 0.9057 | 0.8815 | 0.9433 | 0.0334 |
| LOC646670  | 0.9724 | 0.9225 | 1.0445 | 0.8335 | 0.9433 | 0.0443 |
| LOC649754  | 0.9211 | 1.0301 | 0.9289 | 0.8929 | 0.9433 | 0.0300 |
| NLRP8      | 0.8711 | 0.9529 | 0.9853 | 0.9638 | 0.9433 | 0.0250 |
| C20orf56   | 0.8487 | 0.9669 | 1.0548 | 0.9027 | 0.9433 | 0.0443 |
| DIPAS      | 0.9239 | 1.0327 | 0.9861 | 0.8304 | 0.9433 | 0.0437 |
| FAM48A     | 0.8792 | 1.0348 | 0.9614 | 0.8976 | 0.9433 | 0.0352 |



|            |        |        |        |        |        |        |
|------------|--------|--------|--------|--------|--------|--------|
| HBM        | 0.9448 | 0.9755 | 0.9407 | 0.9122 | 0.9433 | 0.0130 |
| SDCCAG3L   | 0.8962 | 1.1972 | 0.8339 | 0.8458 | 0.9433 | 0.0857 |
| LOC1001342 | 0.9002 | 1.0077 | 1.0041 | 0.8612 | 0.9433 | 0.0370 |
| FAM118B    | 0.9508 | 1.1914 | 0.8991 | 0.7319 | 0.9433 | 0.0950 |
| LOC727978  | 0.9800 | 1.0697 | 0.9460 | 0.7777 | 0.9433 | 0.0611 |
| USO1       | 1.0157 | 1.0555 | 1.0154 | 0.6867 | 0.9433 | 0.0861 |
| S100Z      | 0.9246 | 0.9605 | 0.9892 | 0.8990 | 0.9433 | 0.0198 |
| LOC654117  | 0.9200 | 0.9899 | 1.0149 | 0.8486 | 0.9433 | 0.0374 |
| COX7A2     | 0.8102 | 1.2528 | 0.9967 | 0.7137 | 0.9434 | 0.1187 |
| LOC388117  | 0.8879 | 1.0162 | 0.9797 | 0.8896 | 0.9434 | 0.0324 |
| LOC646821  | 0.8683 | 1.0773 | 0.9420 | 0.8858 | 0.9434 | 0.0473 |
| HEMK1      | 0.8950 | 1.0549 | 1.0163 | 0.8073 | 0.9434 | 0.0567 |
| SLC35A1    | 0.8736 | 1.1452 | 0.9033 | 0.8513 | 0.9434 | 0.0681 |
| RPL26      | 0.8011 | 1.1507 | 1.0783 | 0.7434 | 0.9434 | 0.1006 |
| LOC646317  | 0.9583 | 0.9737 | 1.0219 | 0.8196 | 0.9434 | 0.0434 |
| LOC641801  | 0.9102 | 1.1183 | 0.9696 | 0.7755 | 0.9434 | 0.0710 |
| LOC93349   | 0.9268 | 0.9895 | 0.9487 | 0.9085 | 0.9434 | 0.0174 |
| OMP        | 0.9671 | 0.9699 | 0.9981 | 0.8385 | 0.9434 | 0.0357 |
| ZAR1       | 0.8141 | 1.0867 | 0.9843 | 0.8885 | 0.9434 | 0.0591 |
| FCRL5      | 0.8788 | 1.1416 | 0.9269 | 0.8264 | 0.9434 | 0.0692 |
| LOC645465  | 0.8278 | 1.0638 | 1.0429 | 0.8392 | 0.9434 | 0.0636 |
| LOC642141  | 0.7943 | 0.9870 | 1.0603 | 0.9321 | 0.9434 | 0.0562 |
| LOC1001310 | 0.8963 | 1.1250 | 0.9018 | 0.8506 | 0.9434 | 0.0616 |
| LOC1001294 | 0.8754 | 0.9730 | 1.0146 | 0.9107 | 0.9434 | 0.0311 |
| ERCC-00062 | 0.8797 | 0.9755 | 0.9709 | 0.9477 | 0.9435 | 0.0221 |
| AGL        | 0.8525 | 1.0773 | 1.0274 | 0.8166 | 0.9435 | 0.0641 |
| TMEM85     | 0.8553 | 1.3398 | 0.8566 | 0.7222 | 0.9435 | 0.1358 |
| PHYHD1     | 0.9243 | 1.0592 | 0.9945 | 0.7960 | 0.9435 | 0.0564 |
| LOC646300  | 0.8891 | 1.0718 | 0.9279 | 0.8851 | 0.9435 | 0.0438 |
| AP3M1      | 0.9076 | 1.2498 | 0.8918 | 0.7248 | 0.9435 | 0.1101 |
| LOC1001337 | 0.9120 | 0.9430 | 1.0846 | 0.8344 | 0.9435 | 0.0523 |
| ZBED5      | 0.9364 | 1.0977 | 0.9440 | 0.7959 | 0.9435 | 0.0616 |
| DEDD2      | 0.7821 | 1.3381 | 0.8918 | 0.7620 | 0.9435 | 0.1346 |
| LOC283432  | 0.8906 | 1.0496 | 0.8997 | 0.9342 | 0.9435 | 0.0366 |
| LOC653418  | 0.8877 | 0.9896 | 1.0563 | 0.8404 | 0.9435 | 0.0488 |
| LOC347292  | 0.9062 | 0.8868 | 1.2384 | 0.7426 | 0.9435 | 0.1049 |
| ACTBL2     | 0.8687 | 1.0497 | 0.9712 | 0.8845 | 0.9435 | 0.0420 |
| CXorf40A   | 0.8947 | 1.2639 | 0.9497 | 0.6658 | 0.9435 | 0.1232 |
| ATP5EP2    | 0.8489 | 1.1227 | 1.0573 | 0.7454 | 0.9435 | 0.0882 |
| LOC644922  | 0.9116 | 1.0156 | 0.9315 | 0.9155 | 0.9436 | 0.0244 |
| LOC727762  | 0.9792 | 1.0188 | 0.9408 | 0.8354 | 0.9436 | 0.0394 |
| LOC729806  | 0.9428 | 0.9832 | 0.9784 | 0.8698 | 0.9436 | 0.0262 |
| LOC642935  | 0.9137 | 1.0409 | 0.9829 | 0.8368 | 0.9436 | 0.0441 |
| LOC644105  | 0.9406 | 0.9910 | 1.0013 | 0.8415 | 0.9436 | 0.0365 |
| SAMD4A     | 0.9613 | 0.9418 | 1.0408 | 0.8304 | 0.9436 | 0.0434 |
| MIR181B2   | 0.8179 | 1.0081 | 1.0972 | 0.8512 | 0.9436 | 0.0659 |

|            |        |        |        |        |        |        |
|------------|--------|--------|--------|--------|--------|--------|
| OR10G9     | 0.9929 | 1.0734 | 0.8212 | 0.8869 | 0.9436 | 0.0559 |
| THRB       | 0.8114 | 1.0312 | 0.9496 | 0.9822 | 0.9436 | 0.0471 |
| VPRBP      | 0.8742 | 1.0956 | 0.9623 | 0.8424 | 0.9436 | 0.0567 |
| LOC646388  | 1.0222 | 0.9929 | 0.9418 | 0.8176 | 0.9436 | 0.0452 |
| LOC652687  | 0.9262 | 1.0288 | 0.9601 | 0.8594 | 0.9436 | 0.0353 |
| AP1GBP1    | 0.8562 | 1.0424 | 0.9621 | 0.9139 | 0.9436 | 0.0394 |
| LOC390084  | 0.9020 | 0.9957 | 1.0097 | 0.8671 | 0.9436 | 0.0350 |
| TINAG      | 0.9091 | 1.1725 | 0.8907 | 0.8022 | 0.9436 | 0.0798 |
| MIR409     | 0.9054 | 1.1082 | 0.8999 | 0.8610 | 0.9436 | 0.0557 |
| MIR943     | 0.9090 | 0.9808 | 0.9959 | 0.8888 | 0.9436 | 0.0263 |
| LOC644093  | 0.8941 | 1.0815 | 0.9201 | 0.8789 | 0.9437 | 0.0467 |
| PCP4L1     | 0.8474 | 0.9829 | 1.0365 | 0.9078 | 0.9437 | 0.0415 |
| CEP68      | 0.9220 | 1.1307 | 0.8908 | 0.8312 | 0.9437 | 0.0651 |
| EPHA2      | 0.9189 | 0.9070 | 0.9527 | 0.9961 | 0.9437 | 0.0200 |
| ACTB       | 0.8292 | 1.2600 | 0.9577 | 0.7279 | 0.9437 | 0.1154 |
| LOC727937  | 0.9834 | 1.0099 | 0.9430 | 0.8384 | 0.9437 | 0.0377 |
| LOC643018  | 0.9299 | 1.0317 | 0.8942 | 0.9190 | 0.9437 | 0.0303 |
| LOC1001294 | 0.8933 | 1.0968 | 0.9368 | 0.8479 | 0.9437 | 0.0542 |
| OR1G1      | 0.9814 | 0.9646 | 0.9438 | 0.8850 | 0.9437 | 0.0210 |
| CSN1S1     | 0.8170 | 1.0065 | 1.0456 | 0.9057 | 0.9437 | 0.0515 |
| BMP1       | 0.8588 | 1.0611 | 0.9949 | 0.8600 | 0.9437 | 0.0505 |
| EGFL6      | 0.8810 | 1.0199 | 1.0018 | 0.8721 | 0.9437 | 0.0390 |
| LOC391636  | 0.9089 | 0.9924 | 1.0035 | 0.8700 | 0.9437 | 0.0324 |
| LOC344887  | 0.8639 | 1.0480 | 1.1389 | 0.7241 | 0.9437 | 0.0929 |
| KLF2       | 0.9197 | 1.2218 | 0.9753 | 0.6580 | 0.9437 | 0.1157 |
| DHRS12     | 0.9469 | 1.0763 | 0.9364 | 0.8153 | 0.9437 | 0.0533 |
| VCL        | 0.8945 | 1.2861 | 0.9116 | 0.6827 | 0.9437 | 0.1254 |
| LOC390547  | 0.8300 | 0.9860 | 0.9777 | 0.9812 | 0.9437 | 0.0379 |
| MIR95      | 0.9033 | 1.0159 | 0.9143 | 0.9416 | 0.9437 | 0.0254 |
| TTC9C      | 0.8675 | 1.2788 | 0.9198 | 0.7089 | 0.9437 | 0.1203 |
| LOC644707  | 0.9409 | 0.9148 | 0.9710 | 0.9483 | 0.9438 | 0.0116 |
| MIR338     | 0.9256 | 0.9607 | 0.9721 | 0.9166 | 0.9438 | 0.0134 |
| C2CD4B     | 0.9764 | 1.0634 | 0.9035 | 0.8317 | 0.9438 | 0.0496 |
| LOC644607  | 0.7922 | 0.9033 | 1.1224 | 0.9572 | 0.9438 | 0.0687 |
| LOC645994  | 0.8957 | 0.9843 | 0.9671 | 0.9280 | 0.9438 | 0.0199 |
| PGR        | 0.8177 | 1.0229 | 1.0116 | 0.9229 | 0.9438 | 0.0476 |
| RAD18      | 0.8445 | 1.0054 | 1.0365 | 0.8888 | 0.9438 | 0.0459 |
| NFASC      | 0.8681 | 1.0975 | 0.9887 | 0.8208 | 0.9438 | 0.0622 |
| LOC1001319 | 0.9223 | 1.2148 | 0.8585 | 0.7797 | 0.9438 | 0.0949 |
| FKBP7      | 0.9048 | 1.0482 | 0.9455 | 0.8767 | 0.9438 | 0.0376 |
| GNG12      | 0.6171 | 1.4218 | 0.9918 | 0.7446 | 0.9438 | 0.1773 |
| TMEM38A    | 0.9089 | 1.0331 | 0.9028 | 0.9306 | 0.9438 | 0.0303 |
| SLC22A6    | 0.9493 | 1.0829 | 0.9057 | 0.8375 | 0.9438 | 0.0518 |
| LOC1001340 | 0.9397 | 1.0451 | 0.9492 | 0.8413 | 0.9438 | 0.0416 |
| NBL1       | 0.9040 | 0.9958 | 1.0182 | 0.8575 | 0.9438 | 0.0379 |
| LOC1001278 | 0.9072 | 1.0200 | 0.9606 | 0.8876 | 0.9439 | 0.0297 |

|            |        |        |        |        |        |        |
|------------|--------|--------|--------|--------|--------|--------|
| ERCC-00079 | 0.9399 | 0.9926 | 0.9540 | 0.8890 | 0.9439 | 0.0214 |
| C21orf54   | 0.8890 | 1.1228 | 0.9289 | 0.8348 | 0.9439 | 0.0627 |
| LOC1001297 | 0.8877 | 1.1215 | 0.8807 | 0.8857 | 0.9439 | 0.0592 |
| SLC47A2    | 0.8683 | 1.0206 | 0.9726 | 0.9141 | 0.9439 | 0.0333 |
| AP1G1      | 0.8046 | 1.3084 | 0.9049 | 0.7577 | 0.9439 | 0.1253 |
| RAD52      | 0.9234 | 0.9697 | 0.9782 | 0.9043 | 0.9439 | 0.0179 |
| LOC653431  | 0.9133 | 1.0713 | 0.9880 | 0.8030 | 0.9439 | 0.0570 |
| CLDN16     | 0.8684 | 1.0874 | 0.9492 | 0.8707 | 0.9439 | 0.0514 |
| LOC646845  | 0.9460 | 1.0654 | 0.9431 | 0.8212 | 0.9439 | 0.0499 |
| LOC1001328 | 0.9097 | 0.9631 | 1.0226 | 0.8803 | 0.9439 | 0.0313 |
| LOC647480  | 0.8170 | 1.1223 | 0.9827 | 0.8536 | 0.9439 | 0.0693 |
| YIPF5      | 0.8747 | 1.1162 | 0.8851 | 0.8999 | 0.9439 | 0.0576 |
| LOC641699  | 0.9526 | 1.0493 | 0.9832 | 0.7908 | 0.9440 | 0.0549 |
| ACAP3      | 0.8626 | 1.0858 | 0.9881 | 0.8394 | 0.9440 | 0.0575 |
| LOC643248  | 0.8841 | 1.0641 | 0.9794 | 0.8483 | 0.9440 | 0.0487 |
| SLC16A7    | 0.9193 | 1.0128 | 0.8979 | 0.9460 | 0.9440 | 0.0250 |
| LOC732371  | 0.8793 | 1.0524 | 0.9665 | 0.8778 | 0.9440 | 0.0417 |
| LOC401620  | 0.8499 | 1.0586 | 0.9436 | 0.9239 | 0.9440 | 0.0432 |
| FOLR2      | 0.8218 | 1.1283 | 0.9501 | 0.8758 | 0.9440 | 0.0668 |
| LOC1001299 | 0.9573 | 1.0710 | 0.9270 | 0.8207 | 0.9440 | 0.0515 |
| LOC650087  | 0.9247 | 1.0430 | 0.9684 | 0.8400 | 0.9440 | 0.0424 |
| CD300LB    | 0.8667 | 1.0269 | 0.9146 | 0.9679 | 0.9440 | 0.0345 |
| U2AF1L4    | 0.8625 | 1.0425 | 1.0294 | 0.8417 | 0.9440 | 0.0533 |
| RCOR1      | 0.8796 | 1.0352 | 0.8605 | 1.0009 | 0.9440 | 0.0435 |
| LOC653562  | 0.9645 | 1.0181 | 0.9328 | 0.8609 | 0.9440 | 0.0328 |
| PSENN      | 0.7690 | 1.2584 | 0.9498 | 0.7990 | 0.9440 | 0.1120 |
| LOC652628  | 0.8651 | 1.0976 | 0.8931 | 0.9204 | 0.9441 | 0.0524 |
| MIR656     | 0.8258 | 0.9708 | 1.0735 | 0.9061 | 0.9441 | 0.0524 |
| RASA3      | 0.8709 | 1.1776 | 0.7991 | 0.9286 | 0.9441 | 0.0822 |
| LOC442711  | 0.8719 | 1.1286 | 0.8329 | 0.9430 | 0.9441 | 0.0656 |
| NOS1       | 0.9926 | 0.9804 | 0.9257 | 0.8777 | 0.9441 | 0.0265 |
| HLA-DPB1   | 0.8931 | 1.0091 | 0.9614 | 0.9127 | 0.9441 | 0.0260 |
| PAK3       | 0.9462 | 0.9289 | 1.0214 | 0.8798 | 0.9441 | 0.0294 |
| SLC18A1    | 0.8962 | 0.9918 | 1.0341 | 0.8543 | 0.9441 | 0.0416 |
| PTPLAD2    | 0.9187 | 1.0571 | 1.0407 | 0.7600 | 0.9441 | 0.0687 |
| LOC1001336 | 0.8356 | 1.0042 | 1.0808 | 0.8558 | 0.9441 | 0.0591 |
| CCDC89     | 0.8856 | 1.0485 | 0.9926 | 0.8498 | 0.9441 | 0.0462 |
| EFHC1      | 0.9129 | 0.9753 | 1.0049 | 0.8834 | 0.9441 | 0.0279 |
| LOC652493  | 0.9612 | 0.9310 | 0.9499 | 0.9343 | 0.9441 | 0.0070 |
| KLF15      | 0.8684 | 1.1573 | 0.9464 | 0.8044 | 0.9441 | 0.0768 |
| ZNF646     | 0.9953 | 1.0535 | 0.9297 | 0.7979 | 0.9441 | 0.0549 |
| LOC650339  | 0.8296 | 1.0362 | 1.0049 | 0.9057 | 0.9441 | 0.0472 |
| SFRS14     | 0.9655 | 1.2128 | 0.8251 | 0.7731 | 0.9441 | 0.0984 |
| LOC647082  | 0.9618 | 0.9924 | 0.9572 | 0.8651 | 0.9441 | 0.0275 |
| TCEAL4     | 0.7963 | 1.2976 | 0.8902 | 0.7925 | 0.9441 | 0.1200 |
| ANO9       | 0.9396 | 0.9893 | 0.9696 | 0.8780 | 0.9441 | 0.0243 |

|            |        |        |        |        |        |        |
|------------|--------|--------|--------|--------|--------|--------|
| GUCY1A2    | 0.9406 | 1.0172 | 0.9731 | 0.8456 | 0.9441 | 0.0364 |
| CHCHD6     | 0.8767 | 1.1738 | 0.9700 | 0.7560 | 0.9441 | 0.0882 |
| LOC401623  | 0.9797 | 1.0231 | 0.9601 | 0.8137 | 0.9442 | 0.0454 |
| LOC645868  | 0.8534 | 0.9980 | 1.0615 | 0.8637 | 0.9442 | 0.0511 |
| SAMD5      | 0.9359 | 0.9930 | 1.0110 | 0.8367 | 0.9442 | 0.0392 |
| MX2        | 0.8958 | 1.0136 | 1.0584 | 0.8090 | 0.9442 | 0.0566 |
| FLJ33544   | 0.8805 | 0.9542 | 0.9288 | 1.0133 | 0.9442 | 0.0276 |
| HMX3       | 0.9238 | 1.0360 | 0.9512 | 0.8657 | 0.9442 | 0.0354 |
| LOC1001336 | 0.8174 | 1.1146 | 0.9276 | 0.9173 | 0.9442 | 0.0620 |
| LOC652757  | 0.8896 | 1.0947 | 0.8833 | 0.9093 | 0.9442 | 0.0505 |
| CCDC88B    | 0.9316 | 1.0188 | 0.9845 | 0.8419 | 0.9442 | 0.0385 |
| RRN3P2     | 0.8826 | 0.9436 | 1.0589 | 0.8918 | 0.9442 | 0.0405 |
| MIR602     | 0.8225 | 1.0790 | 1.0250 | 0.8503 | 0.9442 | 0.0635 |
| CALB1      | 0.9238 | 0.9464 | 0.9652 | 0.9416 | 0.9442 | 0.0085 |
| LOC646688  | 0.7002 | 1.1568 | 1.1998 | 0.7201 | 0.9442 | 0.1355 |
| TPH2       | 0.9130 | 1.0060 | 0.9936 | 0.8643 | 0.9442 | 0.0337 |
| KCNE4      | 0.9935 | 0.9908 | 0.9607 | 0.8319 | 0.9442 | 0.0382 |
| TDH        | 0.8881 | 1.0651 | 0.9424 | 0.8814 | 0.9442 | 0.0425 |
| GDF10      | 0.8907 | 1.0818 | 0.9381 | 0.8664 | 0.9442 | 0.0482 |
| LOC645995  | 0.9908 | 1.0871 | 0.8484 | 0.8507 | 0.9443 | 0.0581 |
| LOC1001282 | 0.8359 | 1.0002 | 1.0503 | 0.8906 | 0.9443 | 0.0492 |
| LOC645851  | 0.8583 | 1.0334 | 1.0755 | 0.8098 | 0.9443 | 0.0650 |
| FOS        | 0.9120 | 0.9890 | 0.9487 | 0.9274 | 0.9443 | 0.0167 |
| LOC646173  | 0.8649 | 1.0733 | 0.8862 | 0.9527 | 0.9443 | 0.0469 |
| CRX        | 0.9905 | 0.9971 | 0.9483 | 0.8412 | 0.9443 | 0.0360 |
| LOC442316  | 0.8536 | 1.0792 | 0.9399 | 0.9044 | 0.9443 | 0.0483 |
| LOC729559  | 0.9270 | 1.0322 | 1.0227 | 0.7952 | 0.9443 | 0.0551 |
| SIPA1L1    | 0.8273 | 1.1908 | 0.9624 | 0.7967 | 0.9443 | 0.0897 |
| LOC652168  | 0.8970 | 0.8790 | 1.0421 | 0.9591 | 0.9443 | 0.0368 |
| RIC8A      | 0.9427 | 1.2873 | 0.8890 | 0.6583 | 0.9443 | 0.1299 |
| LOC1001295 | 0.8973 | 1.1112 | 0.9365 | 0.8324 | 0.9443 | 0.0596 |
| LOC653541  | 0.9134 | 0.9812 | 0.9592 | 0.9235 | 0.9443 | 0.0157 |
| LOC388931  | 0.8519 | 1.0790 | 0.8996 | 0.9468 | 0.9443 | 0.0489 |
| DNAJC5G    | 0.8592 | 1.0274 | 0.9401 | 0.9508 | 0.9443 | 0.0344 |
| KRTAP4-2   | 0.8813 | 1.0366 | 0.9314 | 0.9281 | 0.9443 | 0.0328 |
| MIR370     | 0.8217 | 1.0351 | 1.0013 | 0.9193 | 0.9444 | 0.0476 |
| LOC1001342 | 0.9342 | 1.0131 | 0.9209 | 0.9092 | 0.9444 | 0.0235 |
| ZNF506     | 0.9579 | 0.9618 | 0.9012 | 0.9565 | 0.9444 | 0.0144 |
| ZNF193     | 0.8919 | 1.0948 | 0.9506 | 0.8402 | 0.9444 | 0.0550 |
| SNORD114-7 | 0.8427 | 1.0480 | 1.0229 | 0.8639 | 0.9444 | 0.0530 |
| LOC1001282 | 0.8769 | 1.0640 | 0.9659 | 0.8707 | 0.9444 | 0.0454 |
| HTR3C      | 0.9266 | 1.0433 | 0.9276 | 0.8801 | 0.9444 | 0.0348 |
| EPB41L2    | 1.0170 | 0.9719 | 0.9834 | 0.8053 | 0.9444 | 0.0473 |
| LOC1001324 | 0.8513 | 1.0900 | 0.9463 | 0.8900 | 0.9444 | 0.0523 |
| SCN4A      | 0.8968 | 1.0668 | 0.9798 | 0.8343 | 0.9444 | 0.0505 |
| LOC286238  | 0.9052 | 1.0043 | 0.9812 | 0.8869 | 0.9444 | 0.0286 |

|            |        |        |        |        |        |        |
|------------|--------|--------|--------|--------|--------|--------|
| JPH2       | 0.7985 | 1.1347 | 0.9950 | 0.8495 | 0.9444 | 0.0759 |
| ERMP1      | 0.8558 | 1.1651 | 1.0685 | 0.6884 | 0.9444 | 0.1070 |
| DDX3Y      | 0.8292 | 0.9242 | 1.1146 | 0.9098 | 0.9444 | 0.0604 |
| LOC653157  | 0.9768 | 0.9832 | 0.9617 | 0.8560 | 0.9444 | 0.0298 |
| LOC653978  | 0.9153 | 1.0402 | 1.0004 | 0.8220 | 0.9445 | 0.0484 |
| LOC645241  | 0.8904 | 0.9899 | 0.9328 | 0.9648 | 0.9445 | 0.0215 |
| EPS15      | 0.8838 | 1.3192 | 0.9374 | 0.6375 | 0.9445 | 0.1409 |
| C20orf165  | 0.7939 | 1.0303 | 1.0141 | 0.9397 | 0.9445 | 0.0539 |
| ZNF749     | 0.8324 | 1.1467 | 0.9246 | 0.8743 | 0.9445 | 0.0700 |
| CYP11B2    | 0.9480 | 0.9698 | 0.9676 | 0.8926 | 0.9445 | 0.0180 |
| LOC647337  | 1.0159 | 0.9516 | 1.0364 | 0.7741 | 0.9445 | 0.0596 |
| LOC642809  | 0.9293 | 1.1092 | 0.9416 | 0.7980 | 0.9445 | 0.0638 |
| TTC23L     | 0.9433 | 1.0236 | 0.9655 | 0.8456 | 0.9445 | 0.0371 |
| LOC648001  | 0.9109 | 0.9244 | 1.0298 | 0.9129 | 0.9445 | 0.0286 |
| LOC145820  | 0.9244 | 0.9793 | 0.9631 | 0.9112 | 0.9445 | 0.0160 |
| LOC649891  | 1.0337 | 0.9201 | 0.8509 | 0.9733 | 0.9445 | 0.0389 |
| SPSB2      | 0.9485 | 1.1846 | 0.8924 | 0.7525 | 0.9445 | 0.0900 |
| LOC649773  | 0.8659 | 1.0473 | 1.0031 | 0.8617 | 0.9445 | 0.0475 |
| GMCL1      | 0.7169 | 1.3472 | 0.9731 | 0.7409 | 0.9445 | 0.1461 |
| FSTL3      | 0.9365 | 1.1739 | 0.9504 | 0.7173 | 0.9445 | 0.0932 |
| EXOC3L     | 0.8578 | 1.0133 | 1.0412 | 0.8659 | 0.9445 | 0.0481 |
| LOC648931  | 0.9610 | 1.0542 | 0.9091 | 0.8538 | 0.9445 | 0.0426 |
| PLCD4      | 0.8781 | 1.1008 | 0.9213 | 0.8780 | 0.9446 | 0.0531 |
| LOC388444  | 0.8677 | 1.0455 | 0.9877 | 0.8773 | 0.9446 | 0.0433 |
| LOC729977  | 0.9614 | 0.9369 | 0.8842 | 0.9958 | 0.9446 | 0.0235 |
| LOC646804  | 0.8015 | 1.0440 | 0.9790 | 0.9539 | 0.9446 | 0.0513 |
| GCNT6      | 0.9420 | 1.0063 | 1.0083 | 0.8218 | 0.9446 | 0.0437 |
| FOXO4      | 0.9779 | 1.1578 | 0.9335 | 0.7091 | 0.9446 | 0.0923 |
| SLC22A4    | 0.9006 | 1.0013 | 0.9764 | 0.9001 | 0.9446 | 0.0261 |
| LOC1001297 | 0.8199 | 1.1756 | 0.8707 | 0.9122 | 0.9446 | 0.0793 |
| ANKRD17    | 0.7827 | 1.2335 | 0.9735 | 0.7887 | 0.9446 | 0.1060 |
| LOC652761  | 0.8675 | 1.1069 | 0.9361 | 0.8680 | 0.9446 | 0.0564 |
| LOC644981  | 0.9755 | 1.0537 | 0.9095 | 0.8398 | 0.9446 | 0.0457 |
| GLRA2      | 0.9582 | 0.9821 | 0.9401 | 0.8981 | 0.9446 | 0.0177 |
| LOC730461  | 0.8876 | 1.0321 | 1.0128 | 0.8461 | 0.9447 | 0.0459 |
| MIR612     | 0.8961 | 0.9913 | 0.9934 | 0.8978 | 0.9447 | 0.0275 |
| LOC1001325 | 0.6741 | 1.2329 | 0.9872 | 0.8844 | 0.9447 | 0.1161 |
| PDCD1      | 0.8921 | 1.0497 | 1.0527 | 0.7842 | 0.9447 | 0.0653 |
| CCDC84     | 0.9117 | 1.0386 | 0.9599 | 0.8685 | 0.9447 | 0.0364 |
| LOC645039  | 0.9558 | 1.0705 | 0.9310 | 0.8214 | 0.9447 | 0.0511 |
| LOC1001326 | 0.9644 | 0.9401 | 0.9967 | 0.8775 | 0.9447 | 0.0252 |
| FLJ30719   | 0.9141 | 1.0839 | 0.9135 | 0.8672 | 0.9447 | 0.0477 |
| LOC401410  | 0.9379 | 0.9549 | 0.9628 | 0.9231 | 0.9447 | 0.0089 |
| FMR1       | 0.9334 | 1.0316 | 0.9120 | 0.9017 | 0.9447 | 0.0297 |
| KIAA0947   | 0.9006 | 1.0212 | 0.9898 | 0.8671 | 0.9447 | 0.0364 |
| LOC644893  | 0.9129 | 0.9061 | 0.9838 | 0.9759 | 0.9447 | 0.0204 |

|            |        |        |        |        |        |        |
|------------|--------|--------|--------|--------|--------|--------|
| CD200R1L   | 0.8906 | 1.1454 | 0.9073 | 0.8356 | 0.9447 | 0.0686 |
| TMEM145    | 0.8786 | 1.1435 | 0.9469 | 0.8098 | 0.9447 | 0.0719 |
| C2orf65    | 0.9648 | 1.0685 | 0.9133 | 0.8322 | 0.9447 | 0.0495 |
| LOC389174  | 0.8056 | 1.1029 | 0.9858 | 0.8847 | 0.9447 | 0.0643 |
| LOC1001279 | 0.9419 | 0.9587 | 1.0082 | 0.8701 | 0.9447 | 0.0286 |
| ZFP64      | 0.8271 | 1.1732 | 0.9486 | 0.8302 | 0.9448 | 0.0812 |
| SCARNA22   | 0.7613 | 1.1558 | 1.0283 | 0.8337 | 0.9448 | 0.0902 |
| LOC152118  | 0.9368 | 0.8964 | 1.0896 | 0.8562 | 0.9448 | 0.0510 |
| C20orf197  | 0.8344 | 1.0840 | 0.9822 | 0.8784 | 0.9448 | 0.0558 |
| TPM2       | 0.9198 | 0.9897 | 1.0017 | 0.8679 | 0.9448 | 0.0313 |
| C10orf105  | 0.8863 | 1.0373 | 1.0386 | 0.8169 | 0.9448 | 0.0556 |
| LOC651118  | 0.9058 | 1.0125 | 0.9892 | 0.8716 | 0.9448 | 0.0334 |
| LOC729652  | 0.8314 | 1.0028 | 1.0009 | 0.9440 | 0.9448 | 0.0402 |
| PAMR1      | 0.8344 | 1.1040 | 0.9596 | 0.8812 | 0.9448 | 0.0590 |
| LOC653673  | 0.8859 | 1.1060 | 0.8745 | 0.9127 | 0.9448 | 0.0543 |
| LOC645183  | 0.9527 | 1.0380 | 0.9361 | 0.8523 | 0.9448 | 0.0381 |
| LTB4R      | 0.9396 | 1.0241 | 1.0111 | 0.8044 | 0.9448 | 0.0503 |
| LOC730920  | 0.9712 | 1.1291 | 0.9364 | 0.7426 | 0.9448 | 0.0794 |
| LOC342933  | 0.8758 | 1.0247 | 0.9226 | 0.9562 | 0.9448 | 0.0313 |
| MIR1246    | 0.8881 | 0.9269 | 1.0774 | 0.8868 | 0.9448 | 0.0452 |
| TMEM22     | 0.9110 | 1.0101 | 0.8996 | 0.9586 | 0.9448 | 0.0253 |
| TIMM8B     | 0.9744 | 1.0024 | 1.0957 | 0.7068 | 0.9448 | 0.0835 |
| LOC648708  | 0.8905 | 1.0638 | 0.9650 | 0.8601 | 0.9448 | 0.0454 |
| EIF5A2     | 0.9418 | 1.0077 | 0.9750 | 0.8548 | 0.9448 | 0.0329 |
| LOC342931  | 0.7956 | 1.0009 | 1.0772 | 0.9057 | 0.9448 | 0.0609 |
| LOC650851  | 0.9462 | 1.0932 | 0.8715 | 0.8685 | 0.9448 | 0.0526 |
| TNFAIP2    | 0.8376 | 1.0314 | 1.0207 | 0.8897 | 0.9448 | 0.0481 |
| TXNDC9     | 0.9631 | 1.0574 | 1.0946 | 0.6644 | 0.9449 | 0.0975 |
| LOC1001284 | 0.8852 | 1.0108 | 0.9512 | 0.9322 | 0.9449 | 0.0260 |
| LOC440368  | 0.9821 | 0.8772 | 1.0071 | 0.9130 | 0.9449 | 0.0301 |
| C13orf16   | 0.7423 | 1.1438 | 0.9790 | 0.9144 | 0.9449 | 0.0830 |
| RABGEF1    | 0.9252 | 1.1202 | 0.9265 | 0.8075 | 0.9449 | 0.0648 |
| LOC652264  | 0.9368 | 1.0132 | 0.9318 | 0.8978 | 0.9449 | 0.0244 |
| LOC651150  | 0.9222 | 0.9478 | 1.0123 | 0.8973 | 0.9449 | 0.0247 |
| NEUROG1    | 0.8132 | 1.1257 | 1.0001 | 0.8406 | 0.9449 | 0.0730 |
| PLP2       | 0.9116 | 0.9902 | 0.9722 | 0.9056 | 0.9449 | 0.0213 |
| LOC728929  | 0.8176 | 1.0390 | 1.0490 | 0.8740 | 0.9449 | 0.0584 |
| GNG8       | 0.8561 | 1.0899 | 0.9780 | 0.8556 | 0.9449 | 0.0563 |
| C9orf66    | 0.8241 | 1.0801 | 0.9011 | 0.9743 | 0.9449 | 0.0545 |
| LOC550643  | 0.8431 | 1.1839 | 0.9934 | 0.7593 | 0.9449 | 0.0932 |
| LLPH       | 0.6845 | 1.4460 | 0.9345 | 0.7147 | 0.9449 | 0.1761 |
| LOC649486  | 0.8042 | 0.9646 | 1.0850 | 0.9258 | 0.9449 | 0.0579 |
| FAM90A14   | 0.7921 | 1.0612 | 0.9855 | 0.9409 | 0.9449 | 0.0567 |
| LOC440268  | 0.8890 | 1.0014 | 1.0176 | 0.8717 | 0.9449 | 0.0376 |
| ELP2       | 0.9076 | 1.1461 | 1.0017 | 0.7245 | 0.9449 | 0.0884 |
| LOC647630  | 0.8583 | 1.0992 | 0.9256 | 0.8967 | 0.9450 | 0.0532 |

|            |        |        |        |        |        |        |
|------------|--------|--------|--------|--------|--------|--------|
| ENAM       | 0.8560 | 1.1024 | 0.9452 | 0.8762 | 0.9450 | 0.0559 |
| C6orf167   | 0.8715 | 1.0698 | 1.0041 | 0.8344 | 0.9450 | 0.0553 |
| LOC391269  | 0.8801 | 1.0571 | 0.9716 | 0.8711 | 0.9450 | 0.0437 |
| DDX12      | 0.9199 | 1.0134 | 0.9495 | 0.8972 | 0.9450 | 0.0252 |
| CHID1      | 0.8384 | 0.9867 | 0.9755 | 0.9793 | 0.9450 | 0.0356 |
| PANX3      | 0.8746 | 1.0321 | 0.9436 | 0.9297 | 0.9450 | 0.0326 |
| PMS1       | 0.9780 | 1.0466 | 0.8402 | 0.9152 | 0.9450 | 0.0440 |
| MIR1245    | 0.8867 | 0.9780 | 0.9912 | 0.9242 | 0.9450 | 0.0242 |
| MSI1       | 0.9365 | 1.0151 | 0.9601 | 0.8684 | 0.9450 | 0.0304 |
| LOC728780  | 0.8739 | 1.0972 | 1.0009 | 0.8082 | 0.9450 | 0.0646 |
| TRIML1     | 0.7611 | 1.1363 | 0.9671 | 0.9156 | 0.9450 | 0.0773 |
| ALKBH6     | 0.7675 | 1.2323 | 1.0216 | 0.7589 | 0.9450 | 0.1135 |
| LOC648398  | 0.9907 | 0.9617 | 0.9633 | 0.8646 | 0.9450 | 0.0276 |
| MIR576     | 0.8522 | 1.0154 | 0.9724 | 0.9402 | 0.9451 | 0.0346 |
| MIR1288    | 1.0013 | 0.8956 | 0.9988 | 0.8845 | 0.9451 | 0.0318 |
| CHTF8      | 0.8660 | 1.1867 | 0.9058 | 0.8217 | 0.9451 | 0.0824 |
| ARL3       | 0.9290 | 1.1320 | 0.9477 | 0.7715 | 0.9451 | 0.0738 |
| G6PD       | 0.9703 | 1.1856 | 0.8788 | 0.7456 | 0.9451 | 0.0925 |
| KIAA1804   | 0.8777 | 1.1101 | 0.9145 | 0.8781 | 0.9451 | 0.0557 |
| LOC654350  | 0.8219 | 1.1572 | 0.9545 | 0.8468 | 0.9451 | 0.0763 |
| MAGEB16    | 1.0240 | 0.9196 | 0.9565 | 0.8804 | 0.9451 | 0.0305 |
| LOC286467  | 0.8474 | 1.0832 | 0.9723 | 0.8776 | 0.9451 | 0.0532 |
| FHAD1      | 0.8559 | 1.0706 | 1.0080 | 0.8460 | 0.9451 | 0.0559 |
| LOC1001304 | 0.8688 | 0.9612 | 1.0381 | 0.9124 | 0.9451 | 0.0363 |
| LOC729277  | 0.8158 | 1.0150 | 1.0541 | 0.8957 | 0.9451 | 0.0547 |
| LOC644276  | 0.7556 | 1.0252 | 1.1408 | 0.8589 | 0.9451 | 0.0857 |
| LOC652554  | 0.8216 | 0.9781 | 0.9865 | 0.9943 | 0.9451 | 0.0413 |
| DOCK2      | 0.8301 | 1.0786 | 1.1335 | 0.7384 | 0.9451 | 0.0954 |
| LOC474170  | 0.8826 | 1.1168 | 0.8978 | 0.8834 | 0.9452 | 0.0573 |
| LOC654230  | 0.9070 | 0.8782 | 0.9732 | 1.0223 | 0.9452 | 0.0325 |
| KRT18P50   | 0.8592 | 0.9599 | 1.0310 | 0.9307 | 0.9452 | 0.0356 |
| LOC127602  | 0.9185 | 1.0447 | 0.9549 | 0.8628 | 0.9452 | 0.0382 |
| LOC1001328 | 0.8904 | 0.9933 | 1.0393 | 0.8579 | 0.9452 | 0.0426 |
| SBF1       | 0.8361 | 1.2971 | 0.9400 | 0.7077 | 0.9452 | 0.1265 |
| LOC1001344 | 0.8643 | 1.0118 | 0.9698 | 0.9350 | 0.9452 | 0.0312 |
| LOC1001329 | 0.8895 | 1.0387 | 0.9706 | 0.8822 | 0.9452 | 0.0370 |
| LOC644683  | 0.9701 | 0.9107 | 1.0485 | 0.8517 | 0.9453 | 0.0420 |
| LOC392559  | 0.9100 | 0.9838 | 1.0350 | 0.8523 | 0.9453 | 0.0402 |
| MAP3K3     | 0.8318 | 1.0994 | 0.9855 | 0.8644 | 0.9453 | 0.0611 |
| CROP       | 0.8653 | 1.0131 | 1.0679 | 0.8348 | 0.9453 | 0.0565 |
| LOC729562  | 0.8962 | 1.0378 | 0.9986 | 0.8485 | 0.9453 | 0.0439 |
| DDX4       | 0.8907 | 1.0175 | 1.0432 | 0.8296 | 0.9453 | 0.0510 |
| CEP170     | 0.9240 | 1.0702 | 0.9347 | 0.8522 | 0.9453 | 0.0455 |
| MIR876     | 0.9820 | 0.9091 | 1.0432 | 0.8468 | 0.9453 | 0.0428 |
| LOC648003  | 0.8560 | 0.9090 | 1.0049 | 1.0111 | 0.9453 | 0.0378 |
| LOC647009  | 0.8466 | 1.0179 | 1.1072 | 0.8096 | 0.9453 | 0.0705 |

|            |        |        |        |        |        |        |
|------------|--------|--------|--------|--------|--------|--------|
| BCR        | 0.8211 | 1.1766 | 0.9464 | 0.8371 | 0.9453 | 0.0820 |
| MIR421     | 0.8759 | 1.0531 | 0.9917 | 0.8605 | 0.9453 | 0.0463 |
| ZYG11B     | 0.7207 | 1.3238 | 0.9325 | 0.8041 | 0.9453 | 0.1335 |
| LOC389369  | 0.9384 | 0.9873 | 0.9930 | 0.8624 | 0.9453 | 0.0302 |
| LOC643559  | 0.9095 | 1.0305 | 0.9192 | 0.9220 | 0.9453 | 0.0285 |
| NEK11      | 0.8839 | 1.0622 | 1.0215 | 0.8136 | 0.9453 | 0.0582 |
| MATR3      | 0.8811 | 1.2878 | 0.9220 | 0.6904 | 0.9453 | 0.1248 |
| C18orf1    | 0.8483 | 1.0010 | 1.0143 | 0.9176 | 0.9453 | 0.0388 |
| LOC653857  | 0.8588 | 1.0047 | 1.0680 | 0.8498 | 0.9453 | 0.0542 |
| LOC644816  | 0.7752 | 1.2333 | 0.9748 | 0.7980 | 0.9453 | 0.1059 |
| C3orf33    | 0.8681 | 1.0856 | 0.9493 | 0.8784 | 0.9453 | 0.0501 |
| NEUROG3    | 0.9556 | 0.8407 | 1.0286 | 0.9564 | 0.9453 | 0.0389 |
| LOC1001282 | 0.9299 | 1.0346 | 0.9658 | 0.8510 | 0.9453 | 0.0382 |
| FIGNL2     | 0.8193 | 1.1346 | 1.0343 | 0.7931 | 0.9453 | 0.0831 |
| MCF2       | 0.8447 | 1.0845 | 0.9280 | 0.9242 | 0.9453 | 0.0502 |
| FLJ41200   | 0.8975 | 1.0865 | 1.0323 | 0.7650 | 0.9453 | 0.0721 |
| GATA1      | 0.8636 | 1.1177 | 0.9408 | 0.8593 | 0.9453 | 0.0604 |
| PYDC1      | 1.0309 | 0.9887 | 0.9902 | 0.7717 | 0.9454 | 0.0587 |
| TMEM204    | 0.9506 | 0.9763 | 0.9413 | 0.9133 | 0.9454 | 0.0130 |
| LOC649133  | 0.9284 | 1.0552 | 1.0117 | 0.7861 | 0.9454 | 0.0592 |
| VSTM2B     | 0.9137 | 1.0936 | 0.9410 | 0.8332 | 0.9454 | 0.0545 |
| C1orf152   | 0.9148 | 0.9444 | 1.0287 | 0.8937 | 0.9454 | 0.0296 |
| LOC643566  | 0.8931 | 0.9995 | 0.9650 | 0.9240 | 0.9454 | 0.0233 |
| PROL1      | 0.9521 | 1.0990 | 0.8951 | 0.8355 | 0.9454 | 0.0565 |
| CHD5       | 0.9208 | 1.0464 | 0.9428 | 0.8718 | 0.9454 | 0.0368 |
| CCDC59     | 0.7755 | 1.1221 | 1.1344 | 0.7496 | 0.9454 | 0.1057 |
| GLTPD2     | 0.9377 | 1.0292 | 0.9584 | 0.8563 | 0.9454 | 0.0356 |
| OTOP1      | 0.9647 | 1.0813 | 0.8854 | 0.8503 | 0.9454 | 0.0512 |
| RAB33A     | 0.9215 | 0.9431 | 1.0437 | 0.8734 | 0.9454 | 0.0358 |
| PSPHL      | 0.9396 | 0.9262 | 1.0278 | 0.8881 | 0.9454 | 0.0296 |
| CNPY1      | 0.8741 | 1.0806 | 0.9902 | 0.8370 | 0.9455 | 0.0556 |
| LOC643495  | 0.8632 | 1.0318 | 0.9945 | 0.8923 | 0.9455 | 0.0403 |
| LOC647876  | 0.8350 | 1.1749 | 0.9299 | 0.8420 | 0.9455 | 0.0795 |
| LOC1001338 | 0.8597 | 1.0799 | 0.9921 | 0.8501 | 0.9455 | 0.0553 |
| TYMP       | 0.9184 | 1.1469 | 0.8750 | 0.8417 | 0.9455 | 0.0690 |
| IL13RA2    | 0.9836 | 1.0857 | 0.9841 | 0.7286 | 0.9455 | 0.0762 |
| LOC643240  | 0.8652 | 1.0431 | 0.9989 | 0.8747 | 0.9455 | 0.0446 |
| LOC648792  | 1.0510 | 0.9161 | 0.9167 | 0.8982 | 0.9455 | 0.0354 |
| LOC646496  | 0.9832 | 0.8102 | 1.0456 | 0.9429 | 0.9455 | 0.0498 |
| LOC730990  | 0.8397 | 0.9983 | 1.0667 | 0.8774 | 0.9455 | 0.0527 |
| RHBDD3     | 0.8864 | 1.2269 | 0.9196 | 0.7492 | 0.9455 | 0.1008 |
| LOC728297  | 0.9079 | 1.0195 | 1.0029 | 0.8517 | 0.9455 | 0.0398 |
| FAM75A3    | 0.8789 | 0.9473 | 1.0380 | 0.9180 | 0.9455 | 0.0339 |
| PADI6      | 0.9009 | 0.9787 | 1.0059 | 0.8967 | 0.9455 | 0.0276 |
| FBLN5      | 0.9206 | 1.0256 | 0.9663 | 0.8697 | 0.9455 | 0.0332 |
| DHDDS      | 0.9087 | 1.1254 | 0.8972 | 0.8509 | 0.9455 | 0.0612 |



|            |        |        |        |        |        |        |
|------------|--------|--------|--------|--------|--------|--------|
| PDXDC1     | 0.9354 | 1.2878 | 0.8989 | 0.6601 | 0.9456 | 0.1294 |
| FLJ10803   | 0.8792 | 1.0437 | 1.0293 | 0.8300 | 0.9456 | 0.0535 |
| LOC646853  | 0.9200 | 1.0292 | 0.9851 | 0.8480 | 0.9456 | 0.0395 |
| LOC401630  | 0.8782 | 1.0494 | 0.9654 | 0.8893 | 0.9456 | 0.0397 |
| PVT1       | 0.7589 | 1.2053 | 1.0652 | 0.7529 | 0.9456 | 0.1132 |
| LOC729609  | 0.8902 | 0.9339 | 0.9697 | 0.9886 | 0.9456 | 0.0217 |
| LOC727827  | 0.8295 | 1.0472 | 1.0150 | 0.8906 | 0.9456 | 0.0513 |
| PRSS12     | 0.9034 | 1.0164 | 0.9890 | 0.8736 | 0.9456 | 0.0340 |
| HAVCR2     | 0.9016 | 0.9788 | 0.9956 | 0.9065 | 0.9456 | 0.0243 |
| LOC648342  | 0.7768 | 1.0843 | 1.0212 | 0.9001 | 0.9456 | 0.0680 |
| P11        | 0.9894 | 1.0151 | 0.9787 | 0.7993 | 0.9456 | 0.0494 |
| LOC343927  | 0.8168 | 1.1170 | 0.9632 | 0.8855 | 0.9456 | 0.0645 |
| GML        | 0.8346 | 1.0415 | 0.9889 | 0.9176 | 0.9456 | 0.0449 |
| LOC1001328 | 0.8781 | 1.0431 | 1.0028 | 0.8586 | 0.9456 | 0.0456 |
| LOC652750  | 0.9164 | 1.0057 | 1.0616 | 0.7990 | 0.9456 | 0.0573 |
| LOC1001322 | 0.8842 | 0.9731 | 1.0217 | 0.9037 | 0.9457 | 0.0317 |
| ZNF571     | 0.8867 | 1.1478 | 0.8900 | 0.8582 | 0.9457 | 0.0678 |
| LOC1001285 | 0.9360 | 1.0627 | 0.9882 | 0.7959 | 0.9457 | 0.0563 |
| LOC731787  | 0.9790 | 0.9645 | 1.0242 | 0.8151 | 0.9457 | 0.0454 |
| LOC391025  | 0.8934 | 1.0771 | 0.9644 | 0.8479 | 0.9457 | 0.0499 |
| LOC644361  | 0.9158 | 1.0809 | 0.9574 | 0.8287 | 0.9457 | 0.0525 |
| LOC644530  | 0.9615 | 1.0136 | 0.9985 | 0.8092 | 0.9457 | 0.0468 |
| RASL10A    | 0.9740 | 0.9189 | 0.9640 | 0.9259 | 0.9457 | 0.0137 |
| GPX6       | 0.8258 | 1.0608 | 0.9812 | 0.9151 | 0.9457 | 0.0498 |
| C21orf30   | 0.5200 | 1.3362 | 0.9703 | 0.9564 | 0.9457 | 0.1669 |
| MOBK1B     | 0.8894 | 1.2789 | 0.8468 | 0.7679 | 0.9457 | 0.1139 |
| DFNB31     | 0.9184 | 0.9951 | 1.0676 | 0.8019 | 0.9457 | 0.0568 |
| PBX4       | 0.9057 | 0.9707 | 1.0339 | 0.8727 | 0.9457 | 0.0357 |
| LOC728504  | 0.8294 | 1.0494 | 0.9303 | 0.9739 | 0.9458 | 0.0459 |
| LOC652707  | 0.8719 | 1.1092 | 0.9059 | 0.8961 | 0.9458 | 0.0549 |
| KCNJ1      | 0.8547 | 1.0208 | 1.0210 | 0.8865 | 0.9458 | 0.0439 |
| HIP1R      | 0.8973 | 1.0661 | 0.9460 | 0.8737 | 0.9458 | 0.0428 |
| LOC647444  | 0.8758 | 1.0989 | 1.0022 | 0.8062 | 0.9458 | 0.0652 |
| LOC644727  | 0.9545 | 1.0462 | 0.9323 | 0.8501 | 0.9458 | 0.0403 |
| EDN3       | 0.9005 | 0.9894 | 1.0125 | 0.8807 | 0.9458 | 0.0324 |
| TBC1D15    | 0.7410 | 1.3217 | 1.0002 | 0.7203 | 0.9458 | 0.1405 |
| ZNF521     | 0.9526 | 0.9967 | 0.9985 | 0.8353 | 0.9458 | 0.0383 |
| LOC732058  | 0.9321 | 0.9846 | 1.0124 | 0.8542 | 0.9458 | 0.0348 |
| LOC643454  | 0.8564 | 1.0419 | 1.0143 | 0.8706 | 0.9458 | 0.0479 |
| HFE        | 0.9217 | 1.0518 | 0.9430 | 0.8668 | 0.9458 | 0.0388 |
| LOC642287  | 0.8574 | 1.0325 | 0.9486 | 0.9447 | 0.9458 | 0.0358 |
| RAP1A      | 0.8788 | 1.0871 | 1.0427 | 0.7748 | 0.9458 | 0.0725 |
| C6orf107   | 1.0251 | 0.9828 | 0.8947 | 0.8808 | 0.9458 | 0.0348 |
| LOC1001324 | 0.8447 | 1.0545 | 0.9523 | 0.9319 | 0.9458 | 0.0431 |
| CUL7       | 0.7731 | 1.1121 | 1.1212 | 0.7769 | 0.9458 | 0.0987 |
| LOC338799  | 0.9677 | 1.0029 | 0.8818 | 0.9311 | 0.9459 | 0.0259 |

|            |        |        |        |        |        |        |
|------------|--------|--------|--------|--------|--------|--------|
| LRRC61     | 0.8484 | 1.0419 | 1.0227 | 0.8705 | 0.9459 | 0.0503 |
| LOC389672  | 0.7149 | 1.4027 | 1.0365 | 0.6293 | 0.9459 | 0.1757 |
| STX5       | 0.8595 | 1.2510 | 0.9401 | 0.7329 | 0.9459 | 0.1103 |
| C21orf77   | 0.9506 | 0.9872 | 0.9244 | 0.9213 | 0.9459 | 0.0153 |
| C8orf86    | 0.9225 | 1.0666 | 0.9104 | 0.8841 | 0.9459 | 0.0410 |
| CEP120     | 0.8831 | 1.0595 | 1.0253 | 0.8156 | 0.9459 | 0.0578 |
| TMEM37     | 0.9283 | 0.9501 | 1.0140 | 0.8910 | 0.9459 | 0.0258 |
| SPANXD     | 0.7884 | 1.1253 | 0.9742 | 0.8956 | 0.9459 | 0.0709 |
| LOC652046  | 0.8907 | 1.1135 | 1.0179 | 0.7614 | 0.9459 | 0.0766 |
| RP1        | 0.9527 | 1.0371 | 0.9293 | 0.8645 | 0.9459 | 0.0357 |
| LOC1001328 | 0.9168 | 1.0671 | 0.9769 | 0.8228 | 0.9459 | 0.0514 |
| ELOVL1     | 0.9564 | 1.2869 | 0.8490 | 0.6913 | 0.9459 | 0.1260 |
| LOC641714  | 0.9068 | 1.0220 | 1.0255 | 0.8293 | 0.9459 | 0.0477 |
| IKZF5      | 0.8308 | 1.1566 | 1.0380 | 0.7582 | 0.9459 | 0.0919 |
| LOC390594  | 0.9426 | 1.0404 | 0.9371 | 0.8636 | 0.9459 | 0.0363 |
| LOC649620  | 0.8473 | 1.0297 | 1.0522 | 0.8546 | 0.9459 | 0.0551 |
| LOC1001311 | 0.8100 | 1.0093 | 1.0888 | 0.8756 | 0.9459 | 0.0631 |
| CRSP6      | 0.9212 | 1.0752 | 0.8686 | 0.9187 | 0.9459 | 0.0448 |
| LOC401093  | 0.9125 | 0.9748 | 0.9547 | 0.9419 | 0.9460 | 0.0130 |
| ERCC-00086 | 0.8801 | 1.0958 | 0.9533 | 0.8546 | 0.9460 | 0.0541 |
| PHACTR1    | 0.9017 | 1.0361 | 0.9845 | 0.8616 | 0.9460 | 0.0395 |
| PRG4       | 0.9055 | 1.0758 | 0.9596 | 0.8430 | 0.9460 | 0.0494 |
| LOC1001284 | 0.9637 | 0.9943 | 0.9784 | 0.8476 | 0.9460 | 0.0334 |
| LOC729120  | 0.6263 | 1.4058 | 1.0368 | 0.7151 | 0.9460 | 0.1768 |
| OR5T1      | 0.9069 | 1.0372 | 0.9117 | 0.9281 | 0.9460 | 0.0307 |
| LOC1001309 | 0.8950 | 1.0587 | 0.9730 | 0.8573 | 0.9460 | 0.0446 |
| CPB2       | 0.9129 | 1.0370 | 0.9839 | 0.8502 | 0.9460 | 0.0408 |
| PMCHL2     | 0.8588 | 0.9978 | 0.9761 | 0.9512 | 0.9460 | 0.0306 |
| MMS19      | 0.7602 | 1.2940 | 0.9796 | 0.7501 | 0.9460 | 0.1275 |
| FCGR3B     | 0.7990 | 1.1013 | 1.0254 | 0.8583 | 0.9460 | 0.0705 |
| DNAJB4     | 0.9454 | 0.9685 | 1.0385 | 0.8316 | 0.9460 | 0.0430 |
| MGC5457    | 0.8429 | 1.0596 | 1.0711 | 0.8106 | 0.9460 | 0.0692 |
| OR1K1      | 0.8825 | 0.9559 | 1.0445 | 0.9011 | 0.9460 | 0.0363 |
| LOC651430  | 0.7918 | 1.0834 | 1.0087 | 0.9003 | 0.9460 | 0.0637 |
| EMX1       | 0.8306 | 1.0259 | 1.0320 | 0.8956 | 0.9460 | 0.0497 |
| EPM2A      | 0.9082 | 1.0789 | 0.9310 | 0.8662 | 0.9460 | 0.0463 |
| NAPSA      | 0.9388 | 0.9422 | 0.9251 | 0.9781 | 0.9460 | 0.0113 |
| FKSG49     | 1.0098 | 0.9697 | 0.9764 | 0.8283 | 0.9461 | 0.0402 |
| LOC654164  | 0.9504 | 1.0098 | 1.0254 | 0.7986 | 0.9461 | 0.0517 |
| PLEKHO1    | 0.7960 | 0.9822 | 1.0542 | 0.9518 | 0.9461 | 0.0544 |
| POU3F4     | 0.8163 | 1.0370 | 1.0148 | 0.9161 | 0.9461 | 0.0506 |
| HYAL2      | 0.9323 | 1.2102 | 0.8098 | 0.8320 | 0.9461 | 0.0920 |
| ZNF638     | 1.0576 | 1.0591 | 0.8619 | 0.8057 | 0.9461 | 0.0658 |
| LOC653513  | 0.9425 | 1.0339 | 0.9106 | 0.8973 | 0.9461 | 0.0308 |
| LOC645202  | 0.8554 | 1.1094 | 0.9876 | 0.8320 | 0.9461 | 0.0643 |
| DNAH1      | 0.8620 | 1.0690 | 0.9783 | 0.8750 | 0.9461 | 0.0485 |

|            |        |        |        |        |        |        |
|------------|--------|--------|--------|--------|--------|--------|
| LOC731881  | 0.9267 | 0.9780 | 0.9748 | 0.9049 | 0.9461 | 0.0181 |
| IPW        | 0.9837 | 1.0755 | 0.9641 | 0.7611 | 0.9461 | 0.0663 |
| PTPN9      | 0.8884 | 1.1383 | 0.9552 | 0.8026 | 0.9461 | 0.0713 |
| FLJ43826   | 0.9222 | 1.0190 | 0.9400 | 0.9033 | 0.9461 | 0.0254 |
| FLJ44477   | 0.9816 | 1.0517 | 0.9036 | 0.8476 | 0.9461 | 0.0446 |
| FBXW12     | 0.9609 | 1.0660 | 0.8975 | 0.8601 | 0.9461 | 0.0450 |
| PSCD4      | 0.9426 | 1.0493 | 0.8633 | 0.9294 | 0.9461 | 0.0385 |
| ALDH1A2    | 0.8745 | 1.0550 | 0.9390 | 0.9161 | 0.9461 | 0.0387 |
| TSG101     | 0.8897 | 1.2409 | 0.9658 | 0.6882 | 0.9461 | 0.1144 |
| LOC390712  | 0.7804 | 0.9418 | 1.1479 | 0.9145 | 0.9461 | 0.0759 |
| STRA6      | 0.8809 | 0.9948 | 1.0089 | 0.8999 | 0.9461 | 0.0325 |
| YDD19      | 0.8895 | 0.8969 | 1.0782 | 0.9199 | 0.9461 | 0.0445 |
| LOC1001344 | 0.8487 | 1.1193 | 0.9971 | 0.8195 | 0.9461 | 0.0696 |
| LOC647855  | 0.8858 | 1.0029 | 1.0078 | 0.8880 | 0.9462 | 0.0342 |
| LOC1001329 | 0.8798 | 1.0071 | 0.9767 | 0.9209 | 0.9462 | 0.0284 |
| PACS1      | 0.9566 | 1.1453 | 0.8629 | 0.8198 | 0.9462 | 0.0722 |
| TXNRD2     | 0.8666 | 1.2144 | 0.9550 | 0.7486 | 0.9462 | 0.0989 |
| ZNF331     | 0.7885 | 1.1358 | 1.0898 | 0.7706 | 0.9462 | 0.0967 |
| LOC729353  | 0.9135 | 0.9773 | 1.0096 | 0.8844 | 0.9462 | 0.0287 |
| OR6C6      | 0.8592 | 1.0515 | 1.0395 | 0.8347 | 0.9462 | 0.0576 |
| HDAC8      | 0.9202 | 1.1794 | 0.9198 | 0.7654 | 0.9462 | 0.0859 |
| LOC1001310 | 0.8526 | 1.0919 | 0.9338 | 0.9065 | 0.9462 | 0.0514 |
| ADAM2      | 0.7820 | 1.1803 | 0.9158 | 0.9066 | 0.9462 | 0.0838 |
| PDE8A      | 0.9217 | 1.0744 | 0.9021 | 0.8867 | 0.9462 | 0.0433 |
| CPT1C      | 0.8871 | 1.0460 | 0.9718 | 0.8800 | 0.9462 | 0.0393 |
| LOC641741  | 0.8880 | 0.9987 | 0.9866 | 0.9116 | 0.9462 | 0.0274 |
| LOC643836  | 0.9128 | 1.0621 | 0.9464 | 0.8637 | 0.9462 | 0.0422 |
| LOC158301  | 0.9140 | 1.0606 | 0.9332 | 0.8772 | 0.9463 | 0.0398 |
| LEFTY2     | 0.8867 | 1.1153 | 0.8711 | 0.9120 | 0.9463 | 0.0570 |
| C19orf34   | 0.9676 | 1.0632 | 0.8617 | 0.8925 | 0.9463 | 0.0449 |
| PRRT2      | 0.9838 | 0.9745 | 1.0548 | 0.7720 | 0.9463 | 0.0608 |
| ZNF430     | 0.7527 | 1.2670 | 1.0987 | 0.6667 | 0.9463 | 0.1419 |
| CXCL2      | 0.8914 | 1.0244 | 0.9549 | 0.9144 | 0.9463 | 0.0292 |
| LTC4S      | 0.9484 | 0.9587 | 0.9311 | 0.9470 | 0.9463 | 0.0057 |
| MRO        | 0.9397 | 1.0048 | 0.9214 | 0.9192 | 0.9463 | 0.0200 |
| LOC650006  | 0.8665 | 1.0889 | 0.9148 | 0.9149 | 0.9463 | 0.0489 |
| FOXK2      | 0.9542 | 0.9880 | 1.0306 | 0.8123 | 0.9463 | 0.0473 |
| BAP1       | 1.0984 | 1.0659 | 0.8704 | 0.7504 | 0.9463 | 0.0824 |
| ICF45      | 0.8234 | 1.1662 | 0.8752 | 0.9205 | 0.9463 | 0.0759 |
| LOC648170  | 0.9642 | 1.0243 | 0.9615 | 0.8352 | 0.9463 | 0.0398 |
| LOC730200  | 0.8561 | 1.0434 | 0.9630 | 0.9228 | 0.9463 | 0.0391 |
| HLA-DMB    | 0.9231 | 1.1760 | 0.8755 | 0.8107 | 0.9463 | 0.0799 |
| C8orf42    | 0.8883 | 1.1000 | 0.9477 | 0.8493 | 0.9463 | 0.0551 |
| ZDHHC20    | 0.9953 | 1.0104 | 0.8836 | 0.8961 | 0.9463 | 0.0329 |
| SRMS       | 0.9393 | 0.9594 | 0.9975 | 0.8892 | 0.9463 | 0.0225 |
| LOC442181  | 0.8703 | 0.9716 | 1.0875 | 0.8560 | 0.9464 | 0.0536 |

|            |        |        |        |        |        |        |
|------------|--------|--------|--------|--------|--------|--------|
| LOC729051  | 0.9463 | 1.0033 | 0.9631 | 0.8728 | 0.9464 | 0.0273 |
| PLA2G12B   | 0.9651 | 1.0491 | 0.8626 | 0.9087 | 0.9464 | 0.0401 |
| SH3BGRL2   | 0.9816 | 1.1869 | 0.9286 | 0.6884 | 0.9464 | 0.1025 |
| NUDT8      | 0.9971 | 0.9692 | 1.0161 | 0.8031 | 0.9464 | 0.0487 |
| KIF1C      | 0.9420 | 1.0932 | 0.9615 | 0.7889 | 0.9464 | 0.0623 |
| LOC644302  | 0.9011 | 1.0983 | 0.8612 | 0.9249 | 0.9464 | 0.0523 |
| LOC1001279 | 0.9371 | 1.0578 | 0.8995 | 0.8912 | 0.9464 | 0.0385 |
| LOC390507  | 0.8683 | 1.0971 | 1.0163 | 0.8039 | 0.9464 | 0.0671 |
| HEPHL1     | 0.8490 | 1.1669 | 0.9930 | 0.7767 | 0.9464 | 0.0862 |
| N-PAC      | 0.8938 | 1.2415 | 0.8922 | 0.7582 | 0.9464 | 0.1034 |
| FBXL8      | 1.0261 | 0.9561 | 0.9491 | 0.8544 | 0.9464 | 0.0353 |
| NXF2       | 0.8790 | 1.0375 | 0.9627 | 0.9065 | 0.9464 | 0.0350 |
| CD1A       | 0.8965 | 0.9245 | 1.1776 | 0.7872 | 0.9464 | 0.0825 |
| LOC649951  | 0.8078 | 0.9977 | 1.0106 | 0.9697 | 0.9464 | 0.0470 |
| LOC401876  | 0.8548 | 1.0736 | 0.9792 | 0.8781 | 0.9464 | 0.0503 |
| GCNT4      | 0.9109 | 1.0265 | 0.9208 | 0.9276 | 0.9465 | 0.0269 |
| MOAP1      | 0.9207 | 1.2228 | 0.8556 | 0.7868 | 0.9465 | 0.0961 |
| LOC283588  | 0.9408 | 1.0377 | 0.8996 | 0.9078 | 0.9465 | 0.0317 |
| SNORD37    | 0.8650 | 1.0173 | 1.0514 | 0.8522 | 0.9465 | 0.0513 |
| LOC342934  | 0.8695 | 1.0666 | 0.9672 | 0.8826 | 0.9465 | 0.0455 |
| LOC392145  | 0.8391 | 1.1435 | 0.9220 | 0.8812 | 0.9465 | 0.0678 |
| LHFPL4     | 0.9190 | 1.1186 | 0.9624 | 0.7858 | 0.9465 | 0.0686 |
| LOC388955  | 0.9341 | 0.9875 | 1.0041 | 0.8602 | 0.9465 | 0.0324 |
| LOC1001319 | 0.9015 | 1.0027 | 1.0195 | 0.8623 | 0.9465 | 0.0383 |
| C12orf37   | 0.8959 | 1.1751 | 0.9087 | 0.8062 | 0.9465 | 0.0795 |
| HDHD3      | 0.8376 | 1.1797 | 0.9670 | 0.8017 | 0.9465 | 0.0855 |
| ZNF292     | 0.9222 | 1.0949 | 0.9140 | 0.8548 | 0.9465 | 0.0517 |
| LOC139431  | 0.8630 | 1.0527 | 0.9898 | 0.8805 | 0.9465 | 0.0451 |
| LOC650278  | 1.0449 | 0.9533 | 0.9062 | 0.8816 | 0.9465 | 0.0360 |
| LOC1001309 | 0.9145 | 1.1623 | 0.8725 | 0.8367 | 0.9465 | 0.0737 |
| LOC647488  | 0.9305 | 0.9346 | 0.9428 | 0.9781 | 0.9465 | 0.0109 |
| INSC       | 0.9739 | 1.0068 | 0.9369 | 0.8683 | 0.9465 | 0.0297 |
| KPRP       | 0.9355 | 0.9837 | 1.0220 | 0.8449 | 0.9465 | 0.0382 |
| PDCD11     | 0.8814 | 1.0679 | 0.8969 | 0.9398 | 0.9465 | 0.0423 |
| C8orf81    | 0.7887 | 1.0699 | 1.0292 | 0.8984 | 0.9465 | 0.0641 |
| FLJ42393   | 1.0316 | 1.0377 | 0.8973 | 0.8196 | 0.9466 | 0.0533 |
| LOC644242  | 0.8635 | 1.0685 | 0.9696 | 0.8847 | 0.9466 | 0.0466 |
| LOC645043  | 0.8748 | 1.0266 | 0.9934 | 0.8915 | 0.9466 | 0.0374 |
| ZNF680     | 0.8910 | 1.0793 | 1.0929 | 0.7231 | 0.9466 | 0.0876 |
| PCTP       | 0.9600 | 0.9847 | 1.1408 | 0.7009 | 0.9466 | 0.0912 |
| LOXL1      | 0.9185 | 1.0507 | 0.9379 | 0.8793 | 0.9466 | 0.0368 |
| LOC652515  | 0.7884 | 1.0515 | 0.9515 | 0.9950 | 0.9466 | 0.0566 |
| NYNRIN     | 0.9056 | 1.0605 | 0.9023 | 0.9181 | 0.9466 | 0.0381 |
| LOC643055  | 0.8765 | 1.0276 | 0.9626 | 0.9198 | 0.9466 | 0.0322 |
| C8ORFK32   | 0.9467 | 0.9647 | 0.9667 | 0.9084 | 0.9466 | 0.0135 |
| LOC646784  | 0.9322 | 1.0195 | 1.0771 | 0.7577 | 0.9466 | 0.0697 |

|            |        |        |        |        |        |        |
|------------|--------|--------|--------|--------|--------|--------|
| DDX5       | 0.8773 | 1.1530 | 0.9516 | 0.8047 | 0.9466 | 0.0750 |
| ANXA2      | 0.8125 | 1.0357 | 1.0126 | 0.9257 | 0.9466 | 0.0506 |
| PRKY       | 0.8701 | 1.1274 | 0.9123 | 0.8768 | 0.9467 | 0.0610 |
| LOC649025  | 0.8253 | 1.0394 | 0.9975 | 0.9244 | 0.9467 | 0.0469 |
| LOC1001328 | 0.9647 | 1.1961 | 0.8842 | 0.7416 | 0.9467 | 0.0951 |
| BEST1      | 0.9451 | 1.0523 | 0.9407 | 0.8487 | 0.9467 | 0.0416 |
| LOC1001286 | 0.9028 | 1.0459 | 0.9643 | 0.8737 | 0.9467 | 0.0381 |
| BIK        | 0.9591 | 1.0015 | 1.0433 | 0.7829 | 0.9467 | 0.0572 |
| LOC642197  | 0.7282 | 1.1840 | 1.1423 | 0.7321 | 0.9467 | 0.1253 |
| PCK1       | 0.9073 | 1.0410 | 0.9883 | 0.8501 | 0.9467 | 0.0423 |
| PDIA2      | 0.9023 | 1.0658 | 0.9003 | 0.9183 | 0.9467 | 0.0399 |
| LOC647726  | 0.9933 | 1.0326 | 0.9206 | 0.8402 | 0.9467 | 0.0424 |
| LOC645217  | 0.9239 | 1.0499 | 0.9402 | 0.8728 | 0.9467 | 0.0373 |
| TCEAL1     | 0.8614 | 1.2445 | 1.0125 | 0.6684 | 0.9467 | 0.1217 |
| GAB1       | 0.8975 | 1.0760 | 0.8944 | 0.9189 | 0.9467 | 0.0435 |
| LOC442261  | 0.9022 | 0.9221 | 1.0273 | 0.9352 | 0.9467 | 0.0277 |
| C6orf174   | 0.9894 | 0.9515 | 0.9557 | 0.8901 | 0.9467 | 0.0207 |
| LOC440337  | 0.8978 | 1.1131 | 0.9235 | 0.8524 | 0.9467 | 0.0574 |
| C20orf179  | 0.9844 | 1.0194 | 0.9005 | 0.8826 | 0.9467 | 0.0328 |
| OR2A4      | 0.8758 | 1.0539 | 1.0455 | 0.8116 | 0.9467 | 0.0609 |
| FLJ20581   | 0.8121 | 1.0018 | 1.0128 | 0.9602 | 0.9467 | 0.0463 |
| LOC650977  | 0.8726 | 1.0486 | 1.0202 | 0.8455 | 0.9467 | 0.0512 |
| OR5R1      | 0.8389 | 1.1010 | 0.9532 | 0.8939 | 0.9467 | 0.0565 |
| SLC45A1    | 0.8854 | 1.0328 | 1.0187 | 0.8501 | 0.9467 | 0.0463 |
| DSCR5      | 0.7938 | 1.0247 | 1.0016 | 0.9669 | 0.9467 | 0.0524 |
| MEF2C      | 0.9646 | 1.0186 | 0.9869 | 0.8169 | 0.9468 | 0.0447 |
| LOC641896  | 0.9289 | 1.0509 | 1.0229 | 0.7844 | 0.9468 | 0.0601 |
| ECE1       | 0.9390 | 1.1014 | 0.8916 | 0.8550 | 0.9468 | 0.0543 |
| APIP       | 0.6831 | 1.3571 | 0.9096 | 0.8374 | 0.9468 | 0.1447 |
| C17orf63   | 0.7165 | 1.2364 | 1.0470 | 0.7873 | 0.9468 | 0.1199 |
| LOC644359  | 0.9477 | 1.0348 | 0.9497 | 0.8551 | 0.9468 | 0.0367 |
| GARNL3     | 0.8932 | 1.1402 | 0.9234 | 0.8305 | 0.9468 | 0.0673 |
| GPR3       | 0.8666 | 1.2117 | 0.7965 | 0.9125 | 0.9468 | 0.0914 |
| LOC729558  | 0.9063 | 1.0752 | 0.9456 | 0.8602 | 0.9468 | 0.0462 |
| LOC643038  | 1.0236 | 1.0021 | 0.8868 | 0.8748 | 0.9468 | 0.0384 |
| FAM27A     | 0.8085 | 1.1348 | 0.9658 | 0.8782 | 0.9468 | 0.0704 |
| MYB        | 0.8473 | 1.0248 | 1.0163 | 0.8990 | 0.9468 | 0.0439 |
| NUDT12     | 0.9713 | 1.0195 | 1.0539 | 0.7427 | 0.9468 | 0.0701 |
| LOC1001330 | 0.9576 | 0.9751 | 1.0077 | 0.8469 | 0.9468 | 0.0349 |
| LOC729137  | 0.8109 | 1.1897 | 0.8668 | 0.9200 | 0.9468 | 0.0839 |
| GPR120     | 0.8063 | 0.9875 | 1.0832 | 0.9105 | 0.9469 | 0.0587 |
| UCP2       | 0.9473 | 1.0653 | 0.8973 | 0.8776 | 0.9469 | 0.0421 |
| CDH20      | 0.7654 | 1.1741 | 0.9203 | 0.9276 | 0.9469 | 0.0845 |
| PPP4R2     | 0.9629 | 0.9936 | 0.9378 | 0.8931 | 0.9469 | 0.0212 |
| LOC1001323 | 0.8655 | 1.0812 | 0.9793 | 0.8615 | 0.9469 | 0.0524 |
| PDZD4      | 0.9510 | 1.0231 | 0.9868 | 0.8266 | 0.9469 | 0.0427 |

|            |        |        |        |        |        |        |
|------------|--------|--------|--------|--------|--------|--------|
| LOC652708  | 0.9708 | 0.9057 | 1.0677 | 0.8434 | 0.9469 | 0.0479 |
| IKBIP      | 0.8719 | 1.0991 | 0.9765 | 0.8401 | 0.9469 | 0.0585 |
| AGRP       | 0.9590 | 0.9780 | 0.9898 | 0.8608 | 0.9469 | 0.0294 |
| NCOA2      | 0.7731 | 1.1892 | 0.9885 | 0.8367 | 0.9469 | 0.0926 |
| PFKL       | 0.9930 | 1.1395 | 0.8974 | 0.7576 | 0.9469 | 0.0804 |
| LAPTM5     | 0.8081 | 0.9864 | 1.0447 | 0.9483 | 0.9469 | 0.0503 |
| LOC1001318 | 0.8600 | 1.0842 | 0.9596 | 0.8837 | 0.9469 | 0.0505 |
| KCNB1      | 0.9350 | 1.0454 | 0.9154 | 0.8919 | 0.9469 | 0.0340 |
| MIR633     | 0.8951 | 0.9814 | 0.9836 | 0.9275 | 0.9469 | 0.0216 |
| TRAPPC10   | 0.8281 | 1.0055 | 0.9876 | 0.9665 | 0.9469 | 0.0404 |
| VEGFA      | 0.8659 | 1.0880 | 0.9575 | 0.8763 | 0.9469 | 0.0513 |
| LOC647154  | 0.8566 | 1.0092 | 1.0055 | 0.9165 | 0.9469 | 0.0370 |
| ADAD2      | 0.7442 | 1.0650 | 1.0397 | 0.9388 | 0.9469 | 0.0729 |
| LOC645018  | 0.7296 | 1.2725 | 1.1268 | 0.6589 | 0.9469 | 0.1496 |
| PDCL       | 0.8477 | 1.2025 | 0.9629 | 0.7747 | 0.9470 | 0.0936 |
| LOC1001301 | 0.8897 | 1.0237 | 1.0861 | 0.7883 | 0.9470 | 0.0669 |
| WDR59      | 0.8975 | 1.1741 | 0.9552 | 0.7611 | 0.9470 | 0.0859 |
| LOC645685  | 0.9107 | 1.0633 | 0.9854 | 0.8285 | 0.9470 | 0.0503 |
| CBLB       | 0.8448 | 1.2972 | 0.9059 | 0.7400 | 0.9470 | 0.1217 |
| IGFL4      | 0.8981 | 0.9035 | 1.1217 | 0.8646 | 0.9470 | 0.0589 |
| ZNF503     | 0.7883 | 1.1354 | 0.9429 | 0.9213 | 0.9470 | 0.0715 |
| HAMP       | 0.9322 | 1.0912 | 0.8856 | 0.8789 | 0.9470 | 0.0495 |
| CRB3       | 0.8696 | 1.2836 | 0.9085 | 0.7262 | 0.9470 | 0.1189 |
| LOC199800  | 0.7962 | 1.1883 | 0.9333 | 0.8701 | 0.9470 | 0.0852 |
| NUP214     | 0.8423 | 1.4460 | 0.8370 | 0.6627 | 0.9470 | 0.1715 |
| C9orf14    | 0.7698 | 1.0351 | 1.0838 | 0.8993 | 0.9470 | 0.0708 |
| LOC391081  | 0.8609 | 1.0622 | 0.9257 | 0.9392 | 0.9470 | 0.0420 |
| NIPAL4     | 1.0039 | 0.8918 | 1.0075 | 0.8848 | 0.9470 | 0.0339 |
| LOC1001303 | 0.9528 | 1.1261 | 0.8843 | 0.8249 | 0.9470 | 0.0651 |
| LOC653707  | 0.9673 | 0.9468 | 0.9944 | 0.8795 | 0.9470 | 0.0245 |
| C1orf63    | 0.8704 | 1.0680 | 0.9600 | 0.8896 | 0.9470 | 0.0447 |
| LOC158381  | 0.8856 | 1.1349 | 0.8490 | 0.9187 | 0.9470 | 0.0642 |
| ITGA2B     | 0.8006 | 1.0992 | 1.0250 | 0.8633 | 0.9470 | 0.0693 |
| NQO1       | 0.8708 | 1.3625 | 0.8625 | 0.6923 | 0.9470 | 0.1445 |
| RRAGA      | 0.8307 | 1.2036 | 0.9780 | 0.7758 | 0.9470 | 0.0956 |
| LCN1L1     | 0.7945 | 1.0593 | 1.0364 | 0.8980 | 0.9470 | 0.0621 |
| CCL3L1     | 0.9298 | 0.9664 | 0.9593 | 0.9327 | 0.9470 | 0.0093 |
| UBR2       | 0.8540 | 1.1463 | 1.0135 | 0.7744 | 0.9470 | 0.0830 |
| LOC729523  | 1.0234 | 1.0183 | 0.9323 | 0.8143 | 0.9471 | 0.0489 |
| PILRB      | 0.8472 | 1.1256 | 0.9350 | 0.8806 | 0.9471 | 0.0622 |
| MEGF10     | 0.9203 | 1.0477 | 0.9206 | 0.8997 | 0.9471 | 0.0339 |
| RUNX1      | 0.8840 | 1.0730 | 0.9746 | 0.8568 | 0.9471 | 0.0490 |
| LOC652821  | 0.8643 | 1.1239 | 0.9627 | 0.8375 | 0.9471 | 0.0648 |
| OR4P4      | 0.8649 | 1.0274 | 1.0318 | 0.8643 | 0.9471 | 0.0476 |
| LOC648064  | 0.8609 | 1.1257 | 1.0017 | 0.8000 | 0.9471 | 0.0730 |
| LOC652762  | 0.8403 | 0.9690 | 1.0264 | 0.9527 | 0.9471 | 0.0390 |

|            |        |        |        |        |        |        |
|------------|--------|--------|--------|--------|--------|--------|
| MIR552     | 0.9417 | 1.0331 | 0.9463 | 0.8674 | 0.9471 | 0.0339 |
| KDELR1     | 0.8785 | 1.2325 | 0.9275 | 0.7499 | 0.9471 | 0.1022 |
| OR2B6      | 0.8153 | 1.0346 | 1.0196 | 0.9189 | 0.9471 | 0.0509 |
| PCDHGB3    | 0.8473 | 1.0797 | 0.9908 | 0.8707 | 0.9471 | 0.0542 |
| LOC728735  | 0.9593 | 0.9525 | 0.9458 | 0.9309 | 0.9471 | 0.0061 |
| CYP2E1     | 0.8836 | 1.1846 | 0.9183 | 0.8020 | 0.9471 | 0.0828 |
| GABRR3     | 0.8706 | 1.0203 | 0.9805 | 0.9171 | 0.9471 | 0.0332 |
| FUNDC1     | 0.9716 | 1.0782 | 0.9377 | 0.8011 | 0.9471 | 0.0571 |
| MIR582     | 0.9077 | 1.0289 | 0.9255 | 0.9264 | 0.9471 | 0.0276 |
| TBC1D21    | 0.8947 | 1.0786 | 0.9305 | 0.8848 | 0.9471 | 0.0449 |
| LOC731186  | 0.9107 | 1.0129 | 0.9183 | 0.9467 | 0.9472 | 0.0232 |
| LOC728254  | 0.8337 | 1.0519 | 1.0044 | 0.8986 | 0.9472 | 0.0496 |
| LOC641996  | 0.8989 | 1.0772 | 0.9359 | 0.8767 | 0.9472 | 0.0450 |
| LOC1001335 | 1.1144 | 1.0670 | 0.8670 | 0.7404 | 0.9472 | 0.0873 |
| TUBB8      | 0.9268 | 1.0390 | 0.9472 | 0.8756 | 0.9472 | 0.0341 |
| HOXD10     | 0.9927 | 0.9956 | 0.9229 | 0.8776 | 0.9472 | 0.0286 |
| LOC1001294 | 0.8111 | 1.0982 | 0.9568 | 0.9227 | 0.9472 | 0.0592 |
| ANGPTL5    | 0.8756 | 1.0209 | 0.9729 | 0.9194 | 0.9472 | 0.0316 |
| LOC1001344 | 0.9551 | 1.0931 | 0.8563 | 0.8844 | 0.9472 | 0.0529 |
| C17orf55   | 0.9359 | 1.1324 | 0.8261 | 0.8944 | 0.9472 | 0.0658 |
| FLJ34870   | 0.9013 | 0.9995 | 1.0129 | 0.8753 | 0.9472 | 0.0345 |
| MGC27382   | 0.8340 | 1.0299 | 1.1055 | 0.8196 | 0.9472 | 0.0713 |
| LOC645365  | 0.8326 | 1.0862 | 0.9552 | 0.9150 | 0.9473 | 0.0529 |
| UPB1       | 0.8119 | 1.1307 | 0.9199 | 0.9265 | 0.9473 | 0.0665 |
| LOC647122  | 0.8347 | 1.0692 | 1.0140 | 0.8711 | 0.9473 | 0.0561 |
| BAALC      | 0.9348 | 1.0664 | 0.9671 | 0.8208 | 0.9473 | 0.0506 |
| MYST1      | 0.8268 | 1.2464 | 0.8984 | 0.8174 | 0.9473 | 0.1013 |
| SEC24C     | 0.8658 | 1.2278 | 0.8860 | 0.8095 | 0.9473 | 0.0949 |
| NR4A2      | 0.9472 | 1.0161 | 0.9724 | 0.8534 | 0.9473 | 0.0344 |
| SEC14L1    | 0.8763 | 1.0702 | 1.0039 | 0.8388 | 0.9473 | 0.0541 |
| LOC1001329 | 0.9112 | 1.1241 | 0.9471 | 0.8067 | 0.9473 | 0.0660 |
| LRSAM1     | 0.8327 | 1.2034 | 0.9975 | 0.7555 | 0.9473 | 0.0992 |
| SCARNA7    | 0.8828 | 1.1042 | 0.9471 | 0.8551 | 0.9473 | 0.0557 |
| SLITRK6    | 0.8337 | 0.9739 | 1.0688 | 0.9128 | 0.9473 | 0.0496 |
| LOC728275  | 0.7339 | 1.1751 | 1.0155 | 0.8647 | 0.9473 | 0.0953 |
| LOC120364  | 0.9392 | 1.0327 | 0.9185 | 0.8989 | 0.9473 | 0.0296 |
| LOC652792  | 0.9926 | 1.0567 | 0.9096 | 0.8305 | 0.9473 | 0.0492 |
| SLC4A9     | 0.8840 | 1.0267 | 0.9831 | 0.8956 | 0.9473 | 0.0345 |
| CHAD       | 0.8741 | 1.0268 | 1.0604 | 0.8281 | 0.9473 | 0.0568 |
| LOC652800  | 0.8003 | 1.2994 | 0.8396 | 0.8501 | 0.9473 | 0.1178 |
| FUT10      | 0.9034 | 1.0738 | 0.9696 | 0.8425 | 0.9474 | 0.0495 |
| CLDN24     | 0.8290 | 1.0609 | 1.0235 | 0.8760 | 0.9474 | 0.0561 |
| GPR112     | 0.9138 | 1.0729 | 0.9267 | 0.8761 | 0.9474 | 0.0432 |
| LOC644200  | 0.9145 | 1.0880 | 0.9230 | 0.8640 | 0.9474 | 0.0486 |
| NR6A1      | 0.9186 | 1.0715 | 0.9936 | 0.8057 | 0.9474 | 0.0566 |
| NAT8B      | 0.9323 | 0.9802 | 0.9416 | 0.9353 | 0.9474 | 0.0111 |

|            |        |        |        |        |        |        |
|------------|--------|--------|--------|--------|--------|--------|
| RLBP1      | 0.8840 | 1.1102 | 0.9655 | 0.8298 | 0.9474 | 0.0610 |
| ATF2       | 0.7525 | 1.2101 | 1.0293 | 0.7976 | 0.9474 | 0.1065 |
| MT1L       | 0.9120 | 1.0635 | 0.9545 | 0.8595 | 0.9474 | 0.0433 |
| FITM2      | 0.8779 | 1.0493 | 0.9961 | 0.8663 | 0.9474 | 0.0449 |
| LOC642229  | 0.8855 | 0.9981 | 1.0316 | 0.8744 | 0.9474 | 0.0396 |
| LOC643895  | 0.9338 | 1.0226 | 0.9043 | 0.9289 | 0.9474 | 0.0259 |
| LOC1001347 | 0.9467 | 0.9842 | 0.9163 | 0.9424 | 0.9474 | 0.0140 |
| LOC1001332 | 0.8309 | 1.0778 | 0.8897 | 0.9912 | 0.9474 | 0.0546 |
| FLJ32682   | 0.8698 | 1.0609 | 0.9398 | 0.9191 | 0.9474 | 0.0406 |
| AKAP12     | 0.8791 | 1.0217 | 1.0082 | 0.8806 | 0.9474 | 0.0391 |
| SNX19      | 1.0121 | 1.1517 | 0.9385 | 0.6873 | 0.9474 | 0.0973 |
| LOC653180  | 0.8805 | 1.0353 | 0.9439 | 0.9299 | 0.9474 | 0.0323 |
| LOC732150  | 1.0292 | 0.9726 | 0.9760 | 0.8118 | 0.9474 | 0.0470 |
| LOC653528  | 0.8768 | 1.0076 | 1.0401 | 0.8651 | 0.9474 | 0.0447 |
| LOC391810  | 0.9678 | 0.9664 | 1.0072 | 0.8484 | 0.9474 | 0.0343 |
| LOC1001330 | 0.9084 | 1.0612 | 0.9683 | 0.8517 | 0.9474 | 0.0448 |
| LOC729486  | 0.9294 | 1.0337 | 1.0073 | 0.8193 | 0.9474 | 0.0481 |
| LAMP3      | 0.8772 | 1.0686 | 1.0395 | 0.8044 | 0.9474 | 0.0636 |
| NKAIN2     | 0.9121 | 1.0204 | 0.9733 | 0.8839 | 0.9474 | 0.0307 |
| LOC643234  | 0.8854 | 1.0136 | 0.9308 | 0.9599 | 0.9474 | 0.0269 |
| DPF1       | 0.9174 | 1.0367 | 0.9519 | 0.8837 | 0.9474 | 0.0328 |
| CCKBR      | 0.8325 | 1.0981 | 0.9787 | 0.8804 | 0.9474 | 0.0587 |
| MGC12965   | 0.8954 | 1.0356 | 0.9488 | 0.9099 | 0.9474 | 0.0315 |
| LOC642776  | 0.9383 | 1.0461 | 0.9797 | 0.8256 | 0.9475 | 0.0463 |
| SCEL       | 0.8937 | 1.0182 | 1.0361 | 0.8418 | 0.9475 | 0.0474 |
| LOC730118  | 0.8180 | 1.0132 | 1.0563 | 0.9024 | 0.9475 | 0.0540 |
| STXBP4     | 0.8537 | 1.1105 | 1.0006 | 0.8251 | 0.9475 | 0.0666 |
| HSPC072    | 0.8439 | 1.0031 | 1.0000 | 0.9429 | 0.9475 | 0.0372 |
| IL17F      | 0.8149 | 1.0258 | 1.0567 | 0.8926 | 0.9475 | 0.0568 |
| TSPAN16    | 0.9080 | 1.0990 | 0.9399 | 0.8430 | 0.9475 | 0.0544 |
| C6orf160   | 0.8730 | 1.1932 | 1.0956 | 0.6281 | 0.9475 | 0.1258 |
| LOC646580  | 0.8366 | 1.0095 | 1.0034 | 0.9404 | 0.9475 | 0.0401 |
| LOC650457  | 0.8977 | 1.1336 | 0.9816 | 0.7772 | 0.9475 | 0.0749 |
| FLJ35848   | 0.8919 | 1.0568 | 1.0104 | 0.8309 | 0.9475 | 0.0521 |
| LOC1001328 | 0.9106 | 0.9795 | 1.0367 | 0.8633 | 0.9475 | 0.0381 |
| DGCR6L     | 0.6703 | 1.3778 | 0.9662 | 0.7758 | 0.9475 | 0.1560 |
| ATP6V1B2   | 0.7967 | 1.3187 | 0.9715 | 0.7033 | 0.9475 | 0.1356 |
| LOC652694  | 0.9656 | 0.9702 | 0.8862 | 0.9681 | 0.9475 | 0.0205 |
| GMEB2      | 0.8246 | 1.2580 | 0.9292 | 0.7782 | 0.9475 | 0.1082 |
| NCOR1      | 0.8166 | 1.2932 | 0.9369 | 0.7434 | 0.9475 | 0.1219 |
| LOC1001340 | 0.9496 | 1.0324 | 0.9178 | 0.8904 | 0.9475 | 0.0308 |
| RLTPR      | 0.9116 | 1.0812 | 0.8604 | 0.9370 | 0.9475 | 0.0473 |
| MC2R       | 0.9564 | 1.0410 | 0.9774 | 0.8154 | 0.9475 | 0.0476 |
| LOC727828  | 0.9427 | 1.0096 | 0.9573 | 0.8805 | 0.9475 | 0.0266 |
| EGR2       | 0.8867 | 1.1346 | 0.9367 | 0.8322 | 0.9476 | 0.0659 |
| LOC1001341 | 1.0422 | 0.8725 | 0.9279 | 0.9476 | 0.9476 | 0.0353 |



|             |        |        |        |        |        |        |
|-------------|--------|--------|--------|--------|--------|--------|
| LOC1001316  | 0.8474 | 1.0548 | 1.0063 | 0.8817 | 0.9476 | 0.0494 |
| PFTK2       | 0.8999 | 1.0366 | 1.0057 | 0.8480 | 0.9476 | 0.0442 |
| HSD17B13    | 0.9221 | 0.9582 | 0.9741 | 0.9359 | 0.9476 | 0.0116 |
| FFAR3       | 0.9424 | 1.2338 | 0.8534 | 0.7607 | 0.9476 | 0.1024 |
| LOC1001334  | 0.8808 | 0.9982 | 0.9703 | 0.9410 | 0.9476 | 0.0251 |
| LOC401002   | 0.8830 | 1.0819 | 0.8689 | 0.9566 | 0.9476 | 0.0487 |
| FLJ14107    | 0.8875 | 0.9941 | 1.0211 | 0.8877 | 0.9476 | 0.0351 |
| LOC644667   | 0.8423 | 1.0985 | 0.9973 | 0.8523 | 0.9476 | 0.0615 |
| LOC643605   | 0.9764 | 1.0509 | 0.9605 | 0.8027 | 0.9476 | 0.0522 |
| LOC1001327  | 1.0333 | 1.0207 | 0.9637 | 0.7728 | 0.9476 | 0.0602 |
| LOC728709   | 0.8570 | 1.0936 | 0.8670 | 0.9729 | 0.9476 | 0.0553 |
| GALNT5      | 0.9303 | 1.1250 | 0.8953 | 0.8399 | 0.9476 | 0.0620 |
| LOC652038   | 0.8743 | 1.0719 | 0.8904 | 0.9539 | 0.9476 | 0.0448 |
| LOC652271   | 0.8870 | 1.0776 | 0.9420 | 0.8839 | 0.9476 | 0.0453 |
| FAM55B      | 0.9480 | 0.9375 | 0.9915 | 0.9136 | 0.9476 | 0.0163 |
| RGS20       | 0.9022 | 1.0330 | 0.9653 | 0.8900 | 0.9476 | 0.0329 |
| LOC1001283  | 0.9939 | 0.9811 | 1.0576 | 0.7580 | 0.9476 | 0.0654 |
| LOC653590   | 0.8535 | 1.1356 | 1.0247 | 0.7769 | 0.9477 | 0.0813 |
| LOC1001283  | 0.9025 | 1.0740 | 0.9937 | 0.8204 | 0.9477 | 0.0550 |
| SMCR5       | 0.9060 | 1.0242 | 1.0475 | 0.8130 | 0.9477 | 0.0545 |
| PDE8B       | 0.9593 | 1.0808 | 0.8969 | 0.8537 | 0.9477 | 0.0494 |
| LOC651738   | 0.8636 | 1.0817 | 0.9023 | 0.9431 | 0.9477 | 0.0475 |
| LOC286367   | 0.9529 | 0.9518 | 0.9367 | 0.9492 | 0.9477 | 0.0037 |
| GPR27       | 0.9216 | 0.9655 | 0.9792 | 0.9244 | 0.9477 | 0.0145 |
| LOC727869   | 0.8809 | 1.1114 | 0.9859 | 0.8126 | 0.9477 | 0.0652 |
| MAGEB1      | 0.9186 | 1.0314 | 0.9550 | 0.8856 | 0.9477 | 0.0313 |
| LOC732428   | 0.8661 | 0.9672 | 0.9641 | 0.9933 | 0.9477 | 0.0280 |
| C16orf54    | 0.8887 | 1.0192 | 1.0650 | 0.8179 | 0.9477 | 0.0571 |
| CYP27C1     | 0.9549 | 1.0639 | 0.8453 | 0.9267 | 0.9477 | 0.0452 |
| LOC1001297  | 0.9440 | 1.0377 | 0.9386 | 0.8706 | 0.9477 | 0.0343 |
| SNORD114-1  | 0.8887 | 0.9817 | 1.0188 | 0.9015 | 0.9477 | 0.0314 |
| DKFZP434I07 | 0.9401 | 1.2109 | 0.8075 | 0.8323 | 0.9477 | 0.0923 |
| LOC652281   | 0.8598 | 1.2117 | 0.9162 | 0.8031 | 0.9477 | 0.0910 |
| LOC1001338  | 1.0106 | 0.9481 | 0.9563 | 0.8759 | 0.9477 | 0.0277 |
| LOC401317   | 0.9484 | 1.1019 | 0.8508 | 0.8898 | 0.9477 | 0.0552 |
| C17orf71    | 0.9089 | 1.1221 | 1.0238 | 0.7361 | 0.9477 | 0.0829 |
| LOC653669   | 0.9162 | 0.9605 | 0.9720 | 0.9422 | 0.9477 | 0.0122 |
| LOC644852   | 0.8962 | 1.0291 | 0.9559 | 0.9096 | 0.9477 | 0.0300 |
| DDX59       | 0.9455 | 1.0551 | 0.9489 | 0.8414 | 0.9477 | 0.0436 |
| MIR506      | 0.9595 | 1.0339 | 0.9287 | 0.8687 | 0.9477 | 0.0344 |
| RPTN        | 0.9056 | 1.0999 | 0.9199 | 0.8656 | 0.9478 | 0.0520 |
| FPGS        | 0.8279 | 1.0845 | 1.0599 | 0.8187 | 0.9478 | 0.0720 |
| LOC389963   | 0.8737 | 1.1284 | 0.9163 | 0.8727 | 0.9478 | 0.0611 |
| F2RL2       | 0.8684 | 1.0254 | 0.9966 | 0.9007 | 0.9478 | 0.0376 |
| LOC1001330  | 0.9847 | 0.9160 | 0.9963 | 0.8941 | 0.9478 | 0.0252 |
| LOC400954   | 0.9375 | 1.0570 | 0.9278 | 0.8689 | 0.9478 | 0.0394 |

|            |        |        |        |        |        |        |
|------------|--------|--------|--------|--------|--------|--------|
| LOC644411  | 0.8795 | 1.0337 | 1.0077 | 0.8703 | 0.9478 | 0.0425 |
| MGC4677    | 0.8289 | 1.1224 | 0.9917 | 0.8482 | 0.9478 | 0.0686 |
| FLJ41856   | 0.8899 | 1.1006 | 0.9732 | 0.8275 | 0.9478 | 0.0590 |
| GJD4       | 0.8491 | 1.0830 | 0.9895 | 0.8696 | 0.9478 | 0.0547 |
| MIR204     | 0.9767 | 0.9608 | 1.0159 | 0.8378 | 0.9478 | 0.0384 |
| LOC1001325 | 0.8831 | 1.0027 | 0.9593 | 0.9463 | 0.9478 | 0.0247 |
| LOC652211  | 0.9099 | 0.9605 | 1.0423 | 0.8786 | 0.9478 | 0.0357 |
| LOC645181  | 0.9451 | 1.0597 | 0.9825 | 0.8040 | 0.9478 | 0.0535 |
| C1orf229   | 0.9299 | 1.0597 | 0.9048 | 0.8970 | 0.9478 | 0.0379 |
| USP49      | 0.8414 | 1.2142 | 0.9396 | 0.7961 | 0.9478 | 0.0937 |
| OR2T35     | 0.9598 | 0.9846 | 0.9748 | 0.8721 | 0.9478 | 0.0257 |
| LOC1001313 | 0.9181 | 1.1119 | 0.9008 | 0.8606 | 0.9478 | 0.0560 |
| PPP3CA     | 0.9362 | 1.3369 | 0.7827 | 0.7356 | 0.9479 | 0.1366 |
| LOC647499  | 0.9254 | 1.0449 | 0.9180 | 0.9032 | 0.9479 | 0.0327 |
| LOC652760  | 0.9042 | 1.0634 | 0.9241 | 0.8997 | 0.9479 | 0.0389 |
| TAS1R1     | 0.9502 | 0.9309 | 1.0019 | 0.9085 | 0.9479 | 0.0199 |
| FUZ        | 0.8792 | 1.0188 | 1.0771 | 0.8163 | 0.9479 | 0.0604 |
| LOC1001281 | 0.9073 | 1.0757 | 0.9298 | 0.8786 | 0.9479 | 0.0439 |
| LOC648761  | 0.9400 | 0.9884 | 0.9790 | 0.8841 | 0.9479 | 0.0237 |
| TM4SF20    | 0.9987 | 0.9316 | 0.9734 | 0.8879 | 0.9479 | 0.0243 |
| LOC1001315 | 0.8259 | 1.0446 | 1.0268 | 0.8943 | 0.9479 | 0.0527 |
| SCARNA11   | 0.8743 | 1.1367 | 0.9626 | 0.8180 | 0.9479 | 0.0696 |
| PDGFB      | 0.8659 | 1.1704 | 0.9863 | 0.7690 | 0.9479 | 0.0865 |
| POU5F1     | 0.9360 | 1.0759 | 0.9772 | 0.8025 | 0.9479 | 0.0567 |
| MAPK8      | 0.8452 | 1.1455 | 0.9947 | 0.8062 | 0.9479 | 0.0774 |
| MBTPS1     | 0.8899 | 1.2752 | 0.9442 | 0.6823 | 0.9479 | 0.1228 |
| LOC284648  | 0.9151 | 0.8929 | 0.9984 | 0.9853 | 0.9479 | 0.0259 |
| LOC1001320 | 0.7594 | 0.9770 | 1.1201 | 0.9352 | 0.9479 | 0.0743 |
| LOC728601  | 0.8674 | 1.0635 | 1.0268 | 0.8340 | 0.9479 | 0.0570 |
| FLJ43980   | 0.8388 | 1.0335 | 1.0144 | 0.9050 | 0.9479 | 0.0461 |
| LOC645126  | 0.9545 | 0.9836 | 0.9732 | 0.8805 | 0.9479 | 0.0233 |
| LOC728347  | 0.8577 | 1.0678 | 0.9774 | 0.8888 | 0.9479 | 0.0473 |
| LOC651647  | 0.9251 | 1.0174 | 0.8889 | 0.9604 | 0.9479 | 0.0274 |
| LOC646836  | 0.8801 | 1.0797 | 1.0279 | 0.8041 | 0.9479 | 0.0639 |
| REG1B      | 0.9400 | 1.1154 | 0.8223 | 0.9141 | 0.9480 | 0.0612 |
| LOC1001319 | 0.8696 | 0.9101 | 1.2967 | 0.7154 | 0.9480 | 0.1236 |
| SYN3       | 0.8549 | 0.9600 | 1.0686 | 0.9083 | 0.9480 | 0.0456 |
| LOC642451  | 0.8155 | 1.0793 | 0.9953 | 0.9017 | 0.9480 | 0.0571 |
| LOC728796  | 0.8730 | 1.0345 | 0.9730 | 0.9115 | 0.9480 | 0.0354 |
| CRYBG3     | 0.8715 | 1.1544 | 0.9556 | 0.8103 | 0.9480 | 0.0750 |
| LOC730631  | 0.8988 | 1.0241 | 0.9795 | 0.8897 | 0.9480 | 0.0324 |
| LOC651659  | 0.9345 | 1.0152 | 0.9797 | 0.8625 | 0.9480 | 0.0329 |
| LOC1001335 | 0.9446 | 1.0160 | 0.8813 | 0.9501 | 0.9480 | 0.0275 |
| LOC643158  | 0.7955 | 1.0731 | 1.0019 | 0.9215 | 0.9480 | 0.0595 |
| COL5A3     | 0.8274 | 1.0359 | 1.0032 | 0.9257 | 0.9480 | 0.0464 |
| LOC729435  | 0.8383 | 1.1131 | 0.9975 | 0.8431 | 0.9480 | 0.0663 |

|            |        |        |        |        |        |        |
|------------|--------|--------|--------|--------|--------|--------|
| LOC644889  | 0.8377 | 1.1365 | 1.0792 | 0.7387 | 0.9480 | 0.0952 |
| LOC390877  | 0.9406 | 0.9595 | 0.9997 | 0.8924 | 0.9480 | 0.0223 |
| LOC285479  | 0.8755 | 1.0953 | 0.9657 | 0.8558 | 0.9481 | 0.0546 |
| PLGLB2     | 0.8996 | 0.9852 | 1.0588 | 0.8486 | 0.9481 | 0.0464 |
| LOC390956  | 0.8439 | 1.0306 | 1.0314 | 0.8864 | 0.9481 | 0.0486 |
| CMAS       | 0.8843 | 1.3273 | 0.9007 | 0.6799 | 0.9481 | 0.1360 |
| LOC1001320 | 0.9119 | 1.0452 | 1.0031 | 0.8321 | 0.9481 | 0.0476 |
| LOC642344  | 0.9640 | 1.0239 | 1.0509 | 0.7536 | 0.9481 | 0.0673 |
| LOC388312  | 0.8365 | 1.0269 | 1.0003 | 0.9286 | 0.9481 | 0.0426 |
| ARMC5      | 0.9462 | 0.9926 | 0.9687 | 0.8850 | 0.9481 | 0.0231 |
| LOC441073  | 0.8167 | 1.0349 | 1.2138 | 0.7269 | 0.9481 | 0.1097 |
| LOC1001331 | 0.8450 | 1.1209 | 1.0554 | 0.7711 | 0.9481 | 0.0833 |
| CDY1B      | 0.8349 | 1.0538 | 0.9836 | 0.9201 | 0.9481 | 0.0466 |
| C20orf95   | 0.8986 | 1.0460 | 0.9560 | 0.8918 | 0.9481 | 0.0357 |
| LOC442180  | 0.7548 | 1.1299 | 1.0405 | 0.8673 | 0.9481 | 0.0844 |
| OR6C76     | 0.9270 | 0.9756 | 0.9237 | 0.9662 | 0.9481 | 0.0133 |
| PLAC4      | 0.8976 | 0.9571 | 0.9858 | 0.9520 | 0.9481 | 0.0184 |
| LOC1001298 | 0.8937 | 1.0156 | 1.0211 | 0.8621 | 0.9481 | 0.0411 |
| LOC653197  | 0.8777 | 1.0437 | 0.9289 | 0.9423 | 0.9481 | 0.0348 |
| LOC1001316 | 0.8078 | 1.0633 | 1.0087 | 0.9128 | 0.9481 | 0.0562 |
| LOC642216  | 0.9776 | 0.9697 | 0.9605 | 0.8848 | 0.9482 | 0.0214 |
| FIS        | 0.9356 | 0.9436 | 1.0541 | 0.8594 | 0.9482 | 0.0401 |
| SAMD6      | 0.7965 | 1.0850 | 1.0103 | 0.9009 | 0.9482 | 0.0631 |
| LOC649856  | 1.0000 | 1.0245 | 0.9700 | 0.7982 | 0.9482 | 0.0512 |
| LOC728670  | 0.8021 | 1.0239 | 1.0521 | 0.9146 | 0.9482 | 0.0570 |
| LOC643261  | 0.8181 | 1.0390 | 1.0430 | 0.8926 | 0.9482 | 0.0557 |
| NLRX1      | 0.9221 | 1.2263 | 0.8810 | 0.7634 | 0.9482 | 0.0986 |
| LOC441481  | 0.8033 | 1.2778 | 0.9303 | 0.7813 | 0.9482 | 0.1147 |
| ADAT2      | 0.8334 | 1.1086 | 1.0375 | 0.8133 | 0.9482 | 0.0736 |
| ELAVL1     | 0.9064 | 1.1840 | 0.8170 | 0.8854 | 0.9482 | 0.0809 |
| GALNT3     | 0.8716 | 1.0894 | 0.9250 | 0.9068 | 0.9482 | 0.0484 |
| C19orf73   | 0.8731 | 1.0566 | 0.9490 | 0.9141 | 0.9482 | 0.0393 |
| ANXA7      | 0.8812 | 1.1536 | 0.9861 | 0.7720 | 0.9482 | 0.0812 |
| LOC440345  | 0.8924 | 1.0732 | 0.9557 | 0.8716 | 0.9482 | 0.0453 |
| LOC1001344 | 0.8766 | 0.9940 | 0.9996 | 0.9227 | 0.9482 | 0.0296 |
| DRGX       | 0.8818 | 0.9551 | 1.0144 | 0.9417 | 0.9482 | 0.0272 |
| LOC349114  | 0.8733 | 1.0950 | 0.9194 | 0.9052 | 0.9482 | 0.0499 |
| PRAMEF17   | 0.9446 | 1.0298 | 0.9129 | 0.9056 | 0.9482 | 0.0285 |
| ZNF366     | 0.9724 | 0.9840 | 0.9548 | 0.8819 | 0.9482 | 0.0229 |
| GBP3       | 0.9043 | 0.9790 | 1.0662 | 0.8435 | 0.9482 | 0.0481 |
| C1QTNF8    | 0.8589 | 1.0246 | 0.9901 | 0.9194 | 0.9483 | 0.0370 |
| COL24A1    | 1.0041 | 0.9220 | 0.9495 | 0.9175 | 0.9483 | 0.0199 |
| CD69       | 0.8844 | 1.0173 | 0.9823 | 0.9091 | 0.9483 | 0.0310 |
| MIR548F3   | 0.8135 | 1.1057 | 0.9776 | 0.8963 | 0.9483 | 0.0623 |
| NEK3       | 0.9132 | 1.0542 | 0.9892 | 0.8365 | 0.9483 | 0.0471 |
| LGALS9B    | 0.8914 | 1.1049 | 0.9707 | 0.8262 | 0.9483 | 0.0600 |

|            |        |        |        |        |        |        |
|------------|--------|--------|--------|--------|--------|--------|
| MIR519B    | 0.8796 | 1.0250 | 1.0103 | 0.8783 | 0.9483 | 0.0402 |
| LOC730232  | 0.8150 | 1.1258 | 0.9523 | 0.9001 | 0.9483 | 0.0656 |
| C13orf28   | 0.9230 | 1.0653 | 0.9745 | 0.8304 | 0.9483 | 0.0491 |
| ZNF184     | 0.8653 | 1.0992 | 0.9649 | 0.8638 | 0.9483 | 0.0556 |
| A4GNT      | 1.0160 | 1.0059 | 0.9930 | 0.7783 | 0.9483 | 0.0569 |
| NCRNA00153 | 0.7913 | 1.0581 | 1.1254 | 0.8185 | 0.9483 | 0.0841 |
| FBXO41     | 0.9052 | 1.0295 | 1.0174 | 0.8412 | 0.9483 | 0.0454 |
| ZNF451     | 0.8612 | 1.1219 | 1.0097 | 0.8006 | 0.9483 | 0.0726 |
| IDH3A      | 0.6874 | 1.4990 | 0.9323 | 0.6747 | 0.9483 | 0.1929 |
| FAM19A5    | 0.9058 | 1.2157 | 1.0542 | 0.6176 | 0.9483 | 0.1271 |
| LOC1001318 | 0.8894 | 1.0881 | 1.0035 | 0.8124 | 0.9484 | 0.0609 |
| LOC648691  | 0.8110 | 1.1217 | 0.9846 | 0.8761 | 0.9484 | 0.0680 |
| SNORD94    | 0.8022 | 1.1560 | 1.0073 | 0.8278 | 0.9484 | 0.0829 |
| LOC652562  | 0.9054 | 0.9467 | 1.0148 | 0.9266 | 0.9484 | 0.0237 |
| LOC644305  | 0.9060 | 1.0964 | 0.8950 | 0.8961 | 0.9484 | 0.0494 |
| PNMAL2     | 0.8064 | 1.1008 | 0.9847 | 0.9016 | 0.9484 | 0.0625 |
| C3orf16    | 0.9446 | 0.9746 | 0.9633 | 0.9110 | 0.9484 | 0.0139 |
| CCDC103    | 0.8404 | 1.0627 | 1.0807 | 0.8097 | 0.9484 | 0.0716 |
| KCNA1      | 0.8672 | 1.0484 | 0.9734 | 0.9045 | 0.9484 | 0.0399 |
| C12orf12   | 0.9049 | 1.0500 | 0.9764 | 0.8623 | 0.9484 | 0.0412 |
| ING5       | 0.9109 | 1.0087 | 0.9868 | 0.8871 | 0.9484 | 0.0292 |
| CLCA3      | 0.8373 | 1.0672 | 0.9294 | 0.9595 | 0.9484 | 0.0474 |
| HECTD3     | 0.8005 | 1.1908 | 1.0133 | 0.7889 | 0.9484 | 0.0959 |
| ARFRP1     | 0.8948 | 1.0931 | 0.8640 | 0.9417 | 0.9484 | 0.0508 |
| PGLYRP3    | 0.9348 | 0.9637 | 1.0377 | 0.8575 | 0.9484 | 0.0372 |
| ST8SIA4    | 0.8757 | 1.0697 | 0.9503 | 0.8980 | 0.9484 | 0.0434 |
| LOC1001335 | 0.8694 | 0.9956 | 1.0348 | 0.8939 | 0.9484 | 0.0397 |
| TGFB2      | 0.9672 | 1.0269 | 0.9439 | 0.8558 | 0.9484 | 0.0355 |
| LOC1001338 | 0.8987 | 1.1114 | 0.8760 | 0.9075 | 0.9484 | 0.0547 |
| ALDH8A1    | 0.8629 | 1.0597 | 0.9551 | 0.9160 | 0.9484 | 0.0416 |
| NOVA2      | 0.8558 | 1.0270 | 1.0336 | 0.8774 | 0.9484 | 0.0475 |
| LOC1001332 | 0.7902 | 1.0390 | 1.0942 | 0.8705 | 0.9484 | 0.0710 |
| LOC285544  | 0.9516 | 1.0455 | 0.9412 | 0.8554 | 0.9484 | 0.0389 |
| LOC643327  | 0.9227 | 0.9307 | 1.0933 | 0.8471 | 0.9484 | 0.0518 |
| LOC400752  | 0.9844 | 0.8839 | 0.9791 | 0.9465 | 0.9485 | 0.0231 |
| CPSF1      | 1.0337 | 1.1350 | 0.9107 | 0.7144 | 0.9485 | 0.0905 |
| LOC641992  | 0.8888 | 1.1033 | 0.9904 | 0.8115 | 0.9485 | 0.0633 |
| ATG7       | 0.8974 | 1.1369 | 1.0432 | 0.7164 | 0.9485 | 0.0917 |
| MIR155HG   | 0.9475 | 0.9176 | 1.0546 | 0.8743 | 0.9485 | 0.0384 |
| PLEKHG7    | 0.9614 | 1.0876 | 0.8928 | 0.8522 | 0.9485 | 0.0516 |
| LOC1001286 | 0.9676 | 1.0191 | 0.9866 | 0.8206 | 0.9485 | 0.0439 |
| LOC399715  | 0.9363 | 0.9819 | 0.9571 | 0.9186 | 0.9485 | 0.0136 |
| LOC728939  | 0.8276 | 1.1054 | 0.9874 | 0.8736 | 0.9485 | 0.0622 |
| PTPN20B    | 0.8960 | 1.0748 | 0.9968 | 0.8264 | 0.9485 | 0.0548 |
| MIRLET7G   | 0.8224 | 0.9998 | 1.0669 | 0.9049 | 0.9485 | 0.0536 |
| RASA4      | 0.8712 | 1.0253 | 0.9912 | 0.9064 | 0.9485 | 0.0359 |

|            |        |        |        |        |        |        |
|------------|--------|--------|--------|--------|--------|--------|
| HOXC12     | 0.9283 | 0.9247 | 1.1362 | 0.8048 | 0.9485 | 0.0688 |
| LOC338756  | 0.9102 | 1.0217 | 1.0134 | 0.8488 | 0.9485 | 0.0418 |
| SLC2A9     | 0.9182 | 1.0837 | 0.9479 | 0.8443 | 0.9485 | 0.0501 |
| C16orf85   | 0.8760 | 1.1004 | 1.0651 | 0.7525 | 0.9485 | 0.0818 |
| EPS8       | 0.8550 | 1.0503 | 0.9714 | 0.9173 | 0.9485 | 0.0414 |
| LOC650369  | 0.8518 | 1.2413 | 0.9890 | 0.7121 | 0.9485 | 0.1128 |
| LOC651177  | 0.9942 | 0.8887 | 1.0015 | 0.9098 | 0.9485 | 0.0288 |
| LOC730268  | 0.8796 | 1.0493 | 1.0095 | 0.8558 | 0.9485 | 0.0476 |
| PKDREJ     | 0.8948 | 0.9474 | 0.9646 | 0.9873 | 0.9486 | 0.0197 |
| LOC1001334 | 0.9385 | 1.0067 | 0.9085 | 0.9406 | 0.9486 | 0.0207 |
| ZNF568     | 0.8675 | 1.2481 | 0.9062 | 0.7724 | 0.9486 | 0.1037 |
| LOC653657  | 0.9258 | 1.1227 | 0.8977 | 0.8482 | 0.9486 | 0.0602 |
| FLJ35946   | 0.8979 | 1.1078 | 0.9000 | 0.8886 | 0.9486 | 0.0531 |
| UAP1L1     | 0.9571 | 1.3438 | 0.9413 | 0.5521 | 0.9486 | 0.1616 |
| TBC1D28    | 0.8401 | 1.0350 | 1.0650 | 0.8543 | 0.9486 | 0.0589 |
| LOC727878  | 0.8489 | 1.1130 | 1.0306 | 0.8019 | 0.9486 | 0.0737 |
| ZNF71      | 0.9153 | 1.0199 | 1.0584 | 0.8008 | 0.9486 | 0.0578 |
| LOC1001285 | 0.9932 | 1.0168 | 0.9562 | 0.8282 | 0.9486 | 0.0420 |
| MIR452     | 0.8702 | 0.9934 | 1.0313 | 0.8995 | 0.9486 | 0.0381 |
| NOS1AP     | 0.8605 | 1.0786 | 1.0185 | 0.8370 | 0.9486 | 0.0592 |
| LOC643520  | 0.8338 | 0.9627 | 1.0467 | 0.9513 | 0.9486 | 0.0438 |
| CHML       | 0.8269 | 1.1209 | 0.9822 | 0.8645 | 0.9486 | 0.0663 |
| LST1       | 0.9105 | 1.0672 | 0.9684 | 0.8484 | 0.9487 | 0.0465 |
| LOC727927  | 0.8259 | 1.1092 | 0.9454 | 0.9141 | 0.9487 | 0.0592 |
| P2RY8      | 1.0695 | 0.9652 | 0.9155 | 0.8444 | 0.9487 | 0.0473 |
| LOC1001311 | 0.8444 | 1.0342 | 0.9976 | 0.9185 | 0.9487 | 0.0423 |
| MIR223     | 0.9459 | 1.0549 | 0.9463 | 0.8476 | 0.9487 | 0.0424 |
| LOC643359  | 0.9856 | 0.8826 | 0.9338 | 0.9927 | 0.9487 | 0.0256 |
| CGA        | 0.9712 | 1.0158 | 0.9708 | 0.8369 | 0.9487 | 0.0387 |
| LOC285929  | 0.9158 | 1.0595 | 1.0059 | 0.8135 | 0.9487 | 0.0539 |
| C19orf63   | 0.8864 | 1.0028 | 1.0673 | 0.8381 | 0.9487 | 0.0525 |
| LOC645052  | 0.9005 | 0.9979 | 0.9940 | 0.9024 | 0.9487 | 0.0273 |
| SFRS5      | 0.8364 | 1.1398 | 0.9652 | 0.8534 | 0.9487 | 0.0698 |
| LOC729369  | 0.8923 | 1.0381 | 1.0046 | 0.8598 | 0.9487 | 0.0430 |
| FAM113B    | 0.9355 | 1.0292 | 0.9645 | 0.8657 | 0.9487 | 0.0339 |
| GPAM       | 0.9271 | 1.1565 | 1.0062 | 0.7050 | 0.9487 | 0.0941 |
| PRR22      | 0.9541 | 0.9553 | 0.8882 | 0.9973 | 0.9487 | 0.0225 |
| LOC653515  | 0.9524 | 1.0824 | 0.9359 | 0.8241 | 0.9487 | 0.0529 |
| LOC387647  | 0.7672 | 1.1224 | 1.0302 | 0.8751 | 0.9487 | 0.0792 |
| LOC1001341 | 0.8758 | 1.2027 | 0.9204 | 0.7960 | 0.9487 | 0.0885 |
| NHLRC1     | 0.8055 | 1.0761 | 0.9945 | 0.9188 | 0.9487 | 0.0575 |
| LOC1001329 | 0.8682 | 1.0037 | 1.0210 | 0.9021 | 0.9487 | 0.0375 |
| CFL1       | 0.7584 | 1.3001 | 0.9768 | 0.7597 | 0.9488 | 0.1279 |
| PROCA1     | 0.8746 | 1.0315 | 1.0063 | 0.8826 | 0.9488 | 0.0408 |
| LOC1001328 | 0.9271 | 1.0151 | 0.9668 | 0.8861 | 0.9488 | 0.0276 |
| PCA3       | 0.9484 | 1.0167 | 0.9150 | 0.9150 | 0.9488 | 0.0240 |

|            |        |        |        |        |        |        |
|------------|--------|--------|--------|--------|--------|--------|
| LCE1C      | 0.9311 | 1.1022 | 0.9189 | 0.8428 | 0.9488 | 0.0547 |
| LOC642169  | 0.9171 | 1.0210 | 1.0968 | 0.7602 | 0.9488 | 0.0728 |
| UHRF1BP1L  | 0.8854 | 1.0577 | 1.0099 | 0.8422 | 0.9488 | 0.0508 |
| BMP3       | 0.8665 | 1.0810 | 0.8765 | 0.9712 | 0.9488 | 0.0500 |
| TTC21A     | 0.8879 | 1.1078 | 0.9972 | 0.8023 | 0.9488 | 0.0663 |
| LY6G6F     | 0.8814 | 1.0177 | 0.9229 | 0.9732 | 0.9488 | 0.0297 |
| FLJ45422   | 0.8780 | 1.1031 | 0.9188 | 0.8954 | 0.9488 | 0.0521 |
| LANCL2     | 0.9263 | 1.2022 | 0.8679 | 0.7989 | 0.9488 | 0.0884 |
| LOC650494  | 0.8604 | 1.1177 | 0.9165 | 0.9008 | 0.9488 | 0.0575 |
| NCOR2      | 0.9130 | 1.2975 | 0.8824 | 0.7025 | 0.9488 | 0.1251 |
| LOC652330  | 0.8564 | 1.0526 | 1.0517 | 0.8347 | 0.9488 | 0.0598 |
| CYTL1      | 0.8913 | 0.9448 | 1.0005 | 0.9588 | 0.9488 | 0.0225 |
| FAM169B    | 0.8890 | 1.0823 | 0.9598 | 0.8644 | 0.9489 | 0.0488 |
| MAGEA1     | 0.8732 | 1.1097 | 1.0131 | 0.7995 | 0.9489 | 0.0695 |
| LOC644012  | 0.8696 | 0.8592 | 1.1367 | 0.9302 | 0.9489 | 0.0645 |
| FSIP2      | 0.9284 | 1.0100 | 0.9836 | 0.8736 | 0.9489 | 0.0303 |
| OR5D14     | 0.8826 | 1.0862 | 1.0326 | 0.7942 | 0.9489 | 0.0672 |
| LOC652119  | 0.8799 | 1.0690 | 0.9829 | 0.8637 | 0.9489 | 0.0480 |
| EID3       | 0.8676 | 0.9907 | 0.9441 | 0.9932 | 0.9489 | 0.0294 |
| LOC647050  | 0.7969 | 1.2305 | 0.9051 | 0.8631 | 0.9489 | 0.0965 |
| LOC1001316 | 0.8436 | 1.0336 | 1.0268 | 0.8916 | 0.9489 | 0.0480 |
| SNORD14B   | 0.8983 | 0.9268 | 1.0744 | 0.8961 | 0.9489 | 0.0424 |
| NECAP1     | 0.8093 | 1.3508 | 0.9760 | 0.6596 | 0.9489 | 0.1487 |
| NOM1       | 0.8812 | 1.0992 | 0.9571 | 0.8581 | 0.9489 | 0.0544 |
| BCL6B      | 0.7993 | 1.1168 | 0.9930 | 0.8865 | 0.9489 | 0.0686 |
| REXO1L5P   | 0.8725 | 1.0236 | 0.9661 | 0.9335 | 0.9489 | 0.0315 |
| FAM13AOS   | 0.9275 | 1.1233 | 0.8489 | 0.8960 | 0.9489 | 0.0603 |
| LOC643872  | 0.8122 | 0.9589 | 1.0572 | 0.9675 | 0.9489 | 0.0507 |
| LOC1001302 | 1.0132 | 0.9688 | 0.9359 | 0.8778 | 0.9489 | 0.0285 |
| LOC402483  | 0.8483 | 0.9990 | 1.0089 | 0.9396 | 0.9489 | 0.0369 |
| CD97       | 0.8097 | 1.3788 | 0.9190 | 0.6883 | 0.9489 | 0.1508 |
| RHOXF2     | 0.8605 | 0.9320 | 1.1134 | 0.8899 | 0.9490 | 0.0568 |
| RNF10      | 0.9195 | 1.1399 | 1.0174 | 0.7190 | 0.9490 | 0.0889 |
| FZD6       | 0.8196 | 1.1859 | 1.0085 | 0.7817 | 0.9490 | 0.0933 |
| YY1        | 0.6837 | 1.3681 | 1.0006 | 0.7435 | 0.9490 | 0.1557 |
| MIR27B     | 0.8637 | 1.0049 | 1.0752 | 0.8521 | 0.9490 | 0.0546 |
| C10orf71   | 0.8365 | 1.0218 | 0.9655 | 0.9721 | 0.9490 | 0.0395 |
| KCNIP3     | 0.9659 | 1.0097 | 0.9273 | 0.8930 | 0.9490 | 0.0251 |
| ASPG       | 0.8796 | 1.1827 | 0.8466 | 0.8870 | 0.9490 | 0.0784 |
| CNN1       | 0.9659 | 0.9736 | 1.0190 | 0.8373 | 0.9490 | 0.0390 |
| LOC1001308 | 0.9630 | 0.9522 | 0.9849 | 0.8959 | 0.9490 | 0.0190 |
| LOC150207  | 0.9168 | 0.9487 | 0.9866 | 0.9438 | 0.9490 | 0.0144 |
| LOC642502  | 0.7607 | 1.1074 | 1.0740 | 0.8538 | 0.9490 | 0.0843 |
| LOC653629  | 0.9344 | 1.0425 | 0.9944 | 0.8247 | 0.9490 | 0.0470 |
| HIST1H2BH  | 0.8981 | 1.0319 | 0.9886 | 0.8774 | 0.9490 | 0.0367 |
| LOC645721  | 0.9229 | 1.1382 | 0.9689 | 0.7661 | 0.9490 | 0.0766 |

|            |        |        |        |        |        |        |
|------------|--------|--------|--------|--------|--------|--------|
| C8orf74    | 0.9124 | 1.0528 | 0.9456 | 0.8853 | 0.9490 | 0.0367 |
| RALGAPB    | 0.8724 | 1.2528 | 0.9695 | 0.7015 | 0.9490 | 0.1154 |
| LOC643558  | 0.8853 | 1.0686 | 0.9753 | 0.8670 | 0.9491 | 0.0463 |
| SNORD114-1 | 0.9111 | 0.9868 | 1.0100 | 0.8883 | 0.9491 | 0.0293 |
| CXorf50    | 0.8574 | 1.0315 | 1.0257 | 0.8816 | 0.9491 | 0.0462 |
| LOC652466  | 0.9248 | 1.0721 | 0.9292 | 0.8701 | 0.9491 | 0.0431 |
| OR52E8     | 0.9133 | 1.0838 | 0.8827 | 0.9164 | 0.9491 | 0.0455 |
| CADM4      | 0.8827 | 1.1827 | 0.9260 | 0.8050 | 0.9491 | 0.0818 |
| PRMT8      | 0.8784 | 1.0533 | 0.9831 | 0.8815 | 0.9491 | 0.0424 |
| HS6ST3     | 0.8109 | 1.0938 | 1.0018 | 0.8899 | 0.9491 | 0.0621 |
| LOC1001345 | 0.8105 | 0.9442 | 1.1527 | 0.8889 | 0.9491 | 0.0732 |
| RSPH10B2   | 0.9235 | 0.9999 | 0.9811 | 0.8919 | 0.9491 | 0.0250 |
| HIST1H2BL  | 0.9653 | 1.0369 | 0.8965 | 0.8978 | 0.9491 | 0.0334 |
| BCAR4      | 0.8209 | 1.0380 | 0.9584 | 0.9793 | 0.9491 | 0.0460 |
| SERPINA4   | 0.9889 | 1.0041 | 0.9404 | 0.8631 | 0.9491 | 0.0317 |
| LOC1001327 | 0.7219 | 1.2561 | 1.0904 | 0.7282 | 0.9491 | 0.1337 |
| EFNA5      | 0.7392 | 1.3173 | 0.8642 | 0.8759 | 0.9491 | 0.1266 |
| LOC1001292 | 0.9649 | 1.0159 | 0.9847 | 0.8311 | 0.9491 | 0.0407 |
| LOC647041  | 0.9252 | 1.0540 | 0.9393 | 0.8781 | 0.9491 | 0.0373 |
| SFTPA2     | 0.9474 | 0.9895 | 0.9585 | 0.9013 | 0.9491 | 0.0183 |
| TNFRSF25   | 0.8780 | 0.9613 | 0.9860 | 0.9713 | 0.9491 | 0.0243 |
| C9orf64    | 0.8646 | 1.2275 | 0.9022 | 0.8023 | 0.9492 | 0.0950 |
| ZNF691     | 0.9095 | 1.0867 | 1.0575 | 0.7429 | 0.9492 | 0.0789 |
| LOC653260  | 0.9495 | 0.8921 | 1.0866 | 0.8686 | 0.9492 | 0.0488 |
| LOC729706  | 0.9214 | 1.0289 | 0.9470 | 0.8995 | 0.9492 | 0.0283 |
| LOC652062  | 0.8636 | 1.0651 | 1.0152 | 0.8528 | 0.9492 | 0.0535 |
| C20orf71   | 0.9216 | 1.0401 | 0.9669 | 0.8682 | 0.9492 | 0.0364 |
| KIAA1328   | 0.9485 | 1.0826 | 0.9309 | 0.8348 | 0.9492 | 0.0510 |
| TM6SF1     | 0.9812 | 0.9292 | 1.0013 | 0.8851 | 0.9492 | 0.0262 |
| SLC9A7     | 0.9244 | 0.9822 | 1.0707 | 0.8195 | 0.9492 | 0.0527 |
| LOC646813  | 0.9031 | 0.9447 | 1.0746 | 0.8744 | 0.9492 | 0.0442 |
| MIR128-1   | 0.9866 | 0.9450 | 0.9658 | 0.8994 | 0.9492 | 0.0186 |
| BAGE2      | 0.9381 | 1.0077 | 0.9461 | 0.9049 | 0.9492 | 0.0214 |
| LOC642553  | 0.8638 | 1.1503 | 0.9393 | 0.8434 | 0.9492 | 0.0701 |
| BARHL2     | 0.9514 | 1.0735 | 0.9226 | 0.8494 | 0.9492 | 0.0466 |
| SPATA17    | 0.9056 | 0.9375 | 1.0241 | 0.9297 | 0.9492 | 0.0259 |
| PIGS       | 1.0308 | 1.2250 | 0.8207 | 0.7204 | 0.9492 | 0.1124 |
| PLEKHA8    | 0.9309 | 1.1232 | 0.9219 | 0.8208 | 0.9492 | 0.0631 |
| FLJ46358   | 0.8237 | 1.0086 | 1.0791 | 0.8855 | 0.9492 | 0.0579 |
| LOC645548  | 0.9465 | 1.0078 | 0.9277 | 0.9148 | 0.9492 | 0.0206 |
| LOC649366  | 0.8462 | 1.0368 | 1.0148 | 0.8993 | 0.9492 | 0.0457 |
| GPR156     | 0.9814 | 1.0763 | 0.8850 | 0.8543 | 0.9492 | 0.0503 |
| LOC400682  | 0.8747 | 1.0770 | 0.9772 | 0.8681 | 0.9492 | 0.0494 |
| NUS1       | 0.8665 | 1.1921 | 0.8920 | 0.8463 | 0.9492 | 0.0815 |
| CLEC3A     | 0.9340 | 0.9331 | 0.9876 | 0.9423 | 0.9492 | 0.0130 |
| TAS2R7     | 0.9259 | 0.9644 | 0.9862 | 0.9204 | 0.9492 | 0.0158 |

|            |        |        |        |        |        |        |
|------------|--------|--------|--------|--------|--------|--------|
| LOC648117  | 0.9612 | 1.0304 | 1.0211 | 0.7842 | 0.9492 | 0.0571 |
| SMPD2      | 0.8530 | 1.1777 | 0.9587 | 0.8076 | 0.9492 | 0.0825 |
| RP9P       | 0.8180 | 1.0269 | 1.0513 | 0.9008 | 0.9493 | 0.0548 |
| FAM25A     | 0.8594 | 1.0479 | 1.0240 | 0.8657 | 0.9493 | 0.0503 |
| LOC1001309 | 0.8331 | 1.0892 | 1.0239 | 0.8508 | 0.9493 | 0.0635 |
| NCRNA00120 | 1.0163 | 1.0846 | 0.9162 | 0.7800 | 0.9493 | 0.0662 |
| C19orf61   | 0.8556 | 1.1514 | 0.8733 | 0.9168 | 0.9493 | 0.0686 |
| LOC729742  | 0.7513 | 1.2266 | 1.0791 | 0.7401 | 0.9493 | 0.1214 |
| SNORD32A   | 0.7604 | 1.2042 | 1.1029 | 0.7296 | 0.9493 | 0.1199 |
| PPP1R3C    | 0.9554 | 0.9810 | 1.0276 | 0.8331 | 0.9493 | 0.0415 |
| DHDH       | 0.9410 | 1.2117 | 1.0176 | 0.6269 | 0.9493 | 0.1216 |
| LOC388022  | 0.8726 | 1.0708 | 0.9788 | 0.8750 | 0.9493 | 0.0475 |
| SNORD121B  | 0.9251 | 0.9495 | 0.9915 | 0.9310 | 0.9493 | 0.0150 |
| LOC1001296 | 0.8686 | 1.0054 | 1.0209 | 0.9023 | 0.9493 | 0.0376 |
| FOXD4L5    | 0.8980 | 1.0211 | 1.0206 | 0.8575 | 0.9493 | 0.0421 |
| LOC339209  | 0.9710 | 1.0089 | 0.9515 | 0.8658 | 0.9493 | 0.0303 |
| GTF3C4     | 0.9019 | 1.0992 | 0.9794 | 0.8167 | 0.9493 | 0.0600 |
| LOC643422  | 0.8163 | 1.1019 | 0.9619 | 0.9171 | 0.9493 | 0.0593 |
| C9orf31    | 0.9731 | 0.9627 | 0.9613 | 0.9002 | 0.9493 | 0.0166 |
| GOLGA8B    | 0.9197 | 1.0962 | 0.9180 | 0.8634 | 0.9493 | 0.0507 |
| ANKRD36    | 0.8895 | 1.0689 | 0.9786 | 0.8604 | 0.9493 | 0.0471 |
| LOC732425  | 0.8243 | 1.1901 | 1.0076 | 0.7755 | 0.9494 | 0.0945 |
| CDC37L1    | 0.9418 | 1.0727 | 0.8858 | 0.8971 | 0.9494 | 0.0429 |
| WT1        | 0.9182 | 0.9889 | 0.9691 | 0.9212 | 0.9494 | 0.0176 |
| EFTUD1     | 0.8262 | 1.2330 | 1.0076 | 0.7307 | 0.9494 | 0.1106 |
| LOC389465  | 0.8508 | 1.0353 | 1.0194 | 0.8921 | 0.9494 | 0.0459 |
| ERCC-00060 | 0.9510 | 1.0866 | 0.9690 | 0.7909 | 0.9494 | 0.0608 |
| ERBB2IP    | 0.8176 | 1.2295 | 0.8979 | 0.8526 | 0.9494 | 0.0948 |
| LOC400197  | 0.9648 | 1.0757 | 0.8953 | 0.8618 | 0.9494 | 0.0472 |
| LOC646938  | 0.8930 | 1.1105 | 0.9164 | 0.8777 | 0.9494 | 0.0543 |
| LOC644499  | 0.9830 | 1.1119 | 0.9076 | 0.7953 | 0.9494 | 0.0665 |
| RBP1       | 0.9374 | 0.9498 | 0.9810 | 0.9295 | 0.9494 | 0.0113 |
| OR5D18     | 0.8571 | 1.0103 | 1.0586 | 0.8717 | 0.9494 | 0.0502 |
| RBM23      | 0.7843 | 1.3467 | 0.9660 | 0.7008 | 0.9494 | 0.1435 |
| LOC728942  | 0.7831 | 1.1831 | 0.9963 | 0.8352 | 0.9494 | 0.0901 |
| LOC651301  | 0.8892 | 1.1056 | 0.9435 | 0.8594 | 0.9494 | 0.0549 |
| TXNDC6     | 0.8707 | 1.1784 | 0.8800 | 0.8687 | 0.9494 | 0.0764 |
| FSTL4      | 0.9293 | 1.0783 | 0.9302 | 0.8599 | 0.9495 | 0.0460 |
| UBQLNL     | 0.9921 | 0.9298 | 1.0076 | 0.8683 | 0.9495 | 0.0318 |
| LOC649101  | 0.9439 | 1.0129 | 0.9915 | 0.8496 | 0.9495 | 0.0363 |
| SNORA53    | 0.8884 | 1.0553 | 0.8945 | 0.9597 | 0.9495 | 0.0388 |
| FAM9A      | 0.9944 | 1.0506 | 0.9342 | 0.8187 | 0.9495 | 0.0497 |
| C5AR1      | 0.8805 | 1.0140 | 1.0467 | 0.8567 | 0.9495 | 0.0474 |
| CNTF       | 0.8844 | 1.0767 | 0.9546 | 0.8822 | 0.9495 | 0.0456 |
| OPA3       | 0.8845 | 1.0617 | 0.9697 | 0.8820 | 0.9495 | 0.0426 |
| LOC440122  | 0.9538 | 1.1100 | 0.9674 | 0.7666 | 0.9495 | 0.0705 |



|            |        |        |        |        |        |        |
|------------|--------|--------|--------|--------|--------|--------|
| UNQ5830    | 0.8682 | 0.9756 | 1.0895 | 0.8645 | 0.9495 | 0.0533 |
| LOC652216  | 0.9090 | 1.0061 | 0.9271 | 0.9558 | 0.9495 | 0.0212 |
| LOC390561  | 0.9193 | 1.0436 | 1.0351 | 0.7998 | 0.9495 | 0.0574 |
| ZNF542     | 0.9795 | 0.9921 | 0.9780 | 0.8483 | 0.9495 | 0.0339 |
| C8ORFK36   | 0.8422 | 1.0553 | 1.0117 | 0.8888 | 0.9495 | 0.0502 |
| LOC389333  | 0.9469 | 1.0802 | 0.8945 | 0.8763 | 0.9495 | 0.0461 |
| LOC653340  | 0.9396 | 0.9648 | 0.9240 | 0.9696 | 0.9495 | 0.0108 |
| HOXD8      | 0.8572 | 1.0930 | 0.9704 | 0.8774 | 0.9495 | 0.0538 |
| MED4       | 0.7607 | 1.1906 | 1.0081 | 0.8387 | 0.9495 | 0.0955 |
| C1orf183   | 0.8656 | 1.0537 | 1.0401 | 0.8387 | 0.9495 | 0.0566 |
| GUCA1A     | 0.7913 | 1.0669 | 1.0177 | 0.9221 | 0.9495 | 0.0607 |
| MIR647     | 0.9244 | 1.0470 | 0.9363 | 0.8904 | 0.9495 | 0.0339 |
| ZAN        | 0.8457 | 1.0046 | 1.0068 | 0.9411 | 0.9495 | 0.0378 |
| CHN1       | 0.8719 | 1.0388 | 1.0277 | 0.8598 | 0.9495 | 0.0485 |
| LOC399978  | 0.8084 | 1.1470 | 0.9985 | 0.8443 | 0.9496 | 0.0777 |
| LOC651729  | 0.9087 | 1.0842 | 0.9200 | 0.8853 | 0.9496 | 0.0455 |
| LOC1001292 | 0.9306 | 1.0361 | 0.9459 | 0.8856 | 0.9496 | 0.0316 |
| LOC1001325 | 0.7793 | 1.0834 | 1.1152 | 0.8204 | 0.9496 | 0.0871 |
| LOC642602  | 0.9149 | 1.0842 | 0.9636 | 0.8358 | 0.9496 | 0.0520 |
| LOC1001337 | 0.8404 | 0.9776 | 1.0617 | 0.9188 | 0.9496 | 0.0467 |
| MRGPRX4    | 0.9811 | 1.0419 | 0.9417 | 0.8338 | 0.9496 | 0.0438 |
| MYCBP      | 0.9166 | 1.0849 | 0.9488 | 0.8483 | 0.9496 | 0.0497 |
| RNASE6     | 0.9300 | 1.0716 | 0.9650 | 0.8320 | 0.9497 | 0.0495 |
| LCK        | 0.8945 | 1.0583 | 0.9832 | 0.8626 | 0.9497 | 0.0443 |
| RASGEF1A   | 0.8743 | 0.9285 | 1.1169 | 0.8789 | 0.9497 | 0.0571 |
| LOC647448  | 0.8921 | 1.0234 | 1.0466 | 0.8366 | 0.9497 | 0.0508 |
| POLL       | 0.9672 | 1.0562 | 0.9569 | 0.8184 | 0.9497 | 0.0491 |
| DC36       | 0.8633 | 0.9984 | 0.9552 | 0.9818 | 0.9497 | 0.0301 |
| QRICH2     | 0.8385 | 1.0719 | 1.0604 | 0.8279 | 0.9497 | 0.0673 |
| LOC1001283 | 1.0530 | 1.0584 | 0.9209 | 0.7664 | 0.9497 | 0.0689 |
| OR1D4      | 0.9081 | 1.0219 | 0.9945 | 0.8742 | 0.9497 | 0.0350 |
| LOC642685  | 0.9013 | 0.9604 | 1.0269 | 0.9101 | 0.9497 | 0.0289 |
| CTAG2      | 0.9430 | 1.0856 | 0.9536 | 0.8166 | 0.9497 | 0.0550 |
| LOC644860  | 0.9559 | 0.9935 | 0.9991 | 0.8503 | 0.9497 | 0.0345 |
| PDZK1P1    | 0.9503 | 1.0742 | 0.9204 | 0.8539 | 0.9497 | 0.0461 |
| SFRP4      | 0.9368 | 1.0653 | 0.9725 | 0.8244 | 0.9497 | 0.0498 |
| TTY23      | 0.8985 | 1.0103 | 1.0585 | 0.8316 | 0.9497 | 0.0517 |
| CSH1       | 0.8662 | 1.0930 | 0.9138 | 0.9258 | 0.9497 | 0.0495 |
| PSME4      | 0.8789 | 1.1964 | 0.9349 | 0.7887 | 0.9497 | 0.0876 |
| FAM24A     | 0.8734 | 1.0075 | 1.0453 | 0.8727 | 0.9497 | 0.0449 |
| LOC642185  | 0.9213 | 0.9739 | 1.0318 | 0.8719 | 0.9497 | 0.0344 |
| FBXO40     | 0.8623 | 1.0152 | 0.9936 | 0.9278 | 0.9497 | 0.0345 |
| LOC402665  | 0.9091 | 1.0210 | 0.9367 | 0.9321 | 0.9497 | 0.0245 |
| LOC1001306 | 0.9285 | 1.0060 | 0.9977 | 0.8668 | 0.9497 | 0.0326 |
| LOC1001329 | 0.9407 | 0.8919 | 1.1002 | 0.8662 | 0.9497 | 0.0525 |
| LOC648111  | 0.8516 | 1.0153 | 1.0067 | 0.9254 | 0.9497 | 0.0385 |

|            |        |        |        |        |        |        |
|------------|--------|--------|--------|--------|--------|--------|
| SERPINA10  | 0.8616 | 1.1801 | 1.0008 | 0.7564 | 0.9497 | 0.0917 |
| LOC645139  | 0.9528 | 0.9390 | 0.8777 | 1.0295 | 0.9498 | 0.0312 |
| LOC1001299 | 0.8475 | 1.0620 | 0.9973 | 0.8923 | 0.9498 | 0.0488 |
| ZNF547     | 0.8944 | 1.0060 | 0.9553 | 0.9434 | 0.9498 | 0.0229 |
| LOC641367  | 0.8824 | 1.0547 | 0.9752 | 0.8869 | 0.9498 | 0.0410 |
| APBB2      | 0.8541 | 1.1051 | 1.0168 | 0.8231 | 0.9498 | 0.0670 |
| KRTAP10-1  | 0.8378 | 1.1228 | 1.0105 | 0.8281 | 0.9498 | 0.0713 |
| HCFC1      | 0.8231 | 1.1071 | 1.0957 | 0.7733 | 0.9498 | 0.0881 |
| ADRA1A     | 0.8906 | 0.9930 | 0.9873 | 0.9284 | 0.9498 | 0.0246 |
| OR14C36    | 0.8620 | 1.0811 | 0.9775 | 0.8786 | 0.9498 | 0.0506 |
| TRIM7      | 0.9192 | 1.1029 | 0.9507 | 0.8265 | 0.9498 | 0.0574 |
| LOC541473  | 0.9624 | 1.1161 | 0.8833 | 0.8374 | 0.9498 | 0.0612 |
| PSG4       | 0.8571 | 1.1242 | 0.9319 | 0.8860 | 0.9498 | 0.0601 |
| ADAMTS8    | 0.8709 | 1.1048 | 0.9673 | 0.8563 | 0.9498 | 0.0572 |
| TGOLN2     | 0.8039 | 1.2043 | 0.9584 | 0.8327 | 0.9498 | 0.0912 |
| CD209      | 0.8582 | 1.0818 | 0.9987 | 0.8606 | 0.9498 | 0.0549 |
| DOCK3      | 0.8498 | 1.0143 | 1.1254 | 0.8099 | 0.9498 | 0.0733 |
| SNORA71D   | 0.9473 | 1.0509 | 0.9595 | 0.8417 | 0.9498 | 0.0428 |
| ADORA3     | 0.8979 | 1.0485 | 0.9451 | 0.9080 | 0.9498 | 0.0344 |
| CSF2RA     | 0.9965 | 1.1008 | 0.9845 | 0.7176 | 0.9498 | 0.0817 |
| SNORD83A   | 0.8970 | 1.0256 | 0.9384 | 0.9385 | 0.9499 | 0.0271 |
| TRAF3IP3   | 0.9210 | 1.0470 | 0.9595 | 0.8719 | 0.9499 | 0.0370 |
| LOC729251  | 0.8525 | 0.9453 | 1.1499 | 0.8518 | 0.9499 | 0.0702 |
| LOC645458  | 0.9876 | 1.0672 | 0.9550 | 0.7897 | 0.9499 | 0.0584 |
| OAS1       | 0.9094 | 1.0400 | 0.9810 | 0.8692 | 0.9499 | 0.0379 |
| NUBPL      | 0.7184 | 1.2609 | 1.0396 | 0.7806 | 0.9499 | 0.1248 |
| CLDN22     | 0.8681 | 0.8988 | 1.0132 | 1.0195 | 0.9499 | 0.0389 |
| LCN2       | 0.8030 | 1.0791 | 1.0385 | 0.8790 | 0.9499 | 0.0653 |
| APBA1      | 0.8424 | 1.0340 | 1.0319 | 0.8913 | 0.9499 | 0.0490 |
| SYT2       | 0.7919 | 1.1115 | 0.9363 | 0.9600 | 0.9499 | 0.0654 |
| MIR642     | 0.9035 | 0.9971 | 0.9471 | 0.9520 | 0.9499 | 0.0191 |
| SDC1       | 0.8310 | 1.2061 | 1.0155 | 0.7470 | 0.9499 | 0.1022 |
| RLF        | 0.9837 | 1.0802 | 1.0089 | 0.7269 | 0.9499 | 0.0771 |
| KRTAP1-5   | 0.9916 | 1.0225 | 0.8992 | 0.8865 | 0.9499 | 0.0337 |
| NR1D1      | 0.8907 | 0.9348 | 1.0105 | 0.9637 | 0.9499 | 0.0252 |
| HNF4G      | 0.9343 | 0.9933 | 1.0110 | 0.8612 | 0.9500 | 0.0338 |
| LOC642399  | 0.9207 | 1.0012 | 0.9406 | 0.9374 | 0.9500 | 0.0176 |
| CCDC9      | 0.9385 | 1.0830 | 0.9468 | 0.8315 | 0.9500 | 0.0515 |
| LOC401305  | 1.0152 | 1.0457 | 0.9567 | 0.7822 | 0.9500 | 0.0589 |
| BCAN       | 0.8777 | 1.0738 | 0.9923 | 0.8561 | 0.9500 | 0.0510 |
| EWSR1      | 0.8891 | 1.2793 | 0.8868 | 0.7448 | 0.9500 | 0.1148 |
| ZNF500     | 1.0550 | 1.0905 | 0.9021 | 0.7523 | 0.9500 | 0.0775 |
| PRELP      | 0.8379 | 1.0990 | 0.9461 | 0.9169 | 0.9500 | 0.0547 |
| SNORD85    | 0.9283 | 0.9989 | 1.0023 | 0.8704 | 0.9500 | 0.0315 |
| MIR888     | 0.8234 | 1.0740 | 0.9446 | 0.9580 | 0.9500 | 0.0512 |
| UBE2DNL    | 0.8566 | 1.0678 | 1.0221 | 0.8534 | 0.9500 | 0.0556 |

|            |        |        |        |        |        |        |
|------------|--------|--------|--------|--------|--------|--------|
| EXOC6      | 0.9280 | 1.1115 | 0.8823 | 0.8782 | 0.9500 | 0.0550 |
| MIR205     | 0.8261 | 0.9230 | 1.0747 | 0.9761 | 0.9500 | 0.0519 |
| IFIT3      | 0.8952 | 1.0857 | 1.0102 | 0.8089 | 0.9500 | 0.0612 |
| PRG1       | 0.9627 | 0.9515 | 1.0214 | 0.8644 | 0.9500 | 0.0324 |
| CT47A7     | 0.9614 | 0.9575 | 0.9880 | 0.8931 | 0.9500 | 0.0201 |
| C19orf69   | 0.9121 | 1.0125 | 1.0182 | 0.8572 | 0.9500 | 0.0394 |
| MMP12      | 0.8471 | 1.0066 | 1.0527 | 0.8937 | 0.9500 | 0.0479 |
| C1QL3      | 0.8995 | 1.0494 | 1.0043 | 0.8470 | 0.9500 | 0.0465 |
| LOC644694  | 0.8382 | 1.1040 | 0.9770 | 0.8809 | 0.9500 | 0.0590 |
| LOC1001318 | 0.9263 | 0.9871 | 1.0376 | 0.8492 | 0.9500 | 0.0406 |
| C19orf20   | 0.9157 | 1.0662 | 0.9667 | 0.8514 | 0.9500 | 0.0454 |
| LOC730535  | 0.9199 | 0.9335 | 1.0387 | 0.9081 | 0.9500 | 0.0300 |
| CD300LG    | 0.9107 | 1.0992 | 0.9317 | 0.8586 | 0.9500 | 0.0520 |
| DES        | 0.9778 | 0.9287 | 0.9696 | 0.9241 | 0.9500 | 0.0138 |
| LOC649324  | 0.9154 | 1.0966 | 0.9095 | 0.8787 | 0.9500 | 0.0495 |
| LOC728971  | 0.8964 | 1.0575 | 0.9939 | 0.8524 | 0.9500 | 0.0464 |
| LOC1001327 | 0.9077 | 1.0681 | 1.0049 | 0.8194 | 0.9501 | 0.0546 |
| LOC647910  | 0.8149 | 1.0440 | 0.9752 | 0.9661 | 0.9501 | 0.0483 |
| SNTG2      | 0.9049 | 1.0724 | 0.9873 | 0.8356 | 0.9501 | 0.0512 |
| OLFM1      | 0.8627 | 1.0112 | 1.0542 | 0.8721 | 0.9501 | 0.0486 |
| SNORD33    | 0.6062 | 1.2509 | 1.1097 | 0.8335 | 0.9501 | 0.1437 |
| MIR1206    | 0.9089 | 1.0430 | 0.9195 | 0.9288 | 0.9501 | 0.0312 |
| REPS1      | 0.8215 | 1.0096 | 1.0155 | 0.9537 | 0.9501 | 0.0451 |
| KRT35      | 1.0702 | 0.9384 | 0.9042 | 0.8874 | 0.9501 | 0.0414 |
| C4orf22    | 0.8716 | 0.9202 | 1.0181 | 0.9904 | 0.9501 | 0.0333 |
| KIAA0802   | 0.7910 | 1.2302 | 1.0045 | 0.7746 | 0.9501 | 0.1070 |
| EML2       | 0.8104 | 1.1879 | 0.9187 | 0.8834 | 0.9501 | 0.0824 |
| CRISP2     | 0.8473 | 1.0000 | 1.0186 | 0.9344 | 0.9501 | 0.0387 |
| ARHGEF10L  | 0.8860 | 1.0566 | 0.9661 | 0.8917 | 0.9501 | 0.0399 |
| IL8RB      | 0.9395 | 1.0144 | 1.0066 | 0.8399 | 0.9501 | 0.0404 |
| TMEM191A   | 0.9577 | 1.0335 | 1.0004 | 0.8089 | 0.9501 | 0.0496 |
| LOC1001283 | 0.8927 | 1.0237 | 0.9780 | 0.9060 | 0.9501 | 0.0309 |
| GNS        | 0.8641 | 1.2754 | 0.9081 | 0.7528 | 0.9501 | 0.1132 |
| PKN3       | 1.0328 | 0.9571 | 0.9307 | 0.8798 | 0.9501 | 0.0319 |
| LOC1001314 | 0.9568 | 0.9820 | 0.9274 | 0.9342 | 0.9501 | 0.0123 |
| LOC388080  | 0.9139 | 1.0077 | 0.9956 | 0.8834 | 0.9501 | 0.0305 |
| FLJ20518   | 0.9365 | 1.0199 | 0.9716 | 0.8725 | 0.9501 | 0.0310 |
| DKFZp779B1 | 0.8926 | 0.9660 | 1.0661 | 0.8758 | 0.9502 | 0.0433 |
| CRCT1      | 1.0091 | 1.0104 | 0.9130 | 0.8680 | 0.9502 | 0.0356 |
| LOC652646  | 0.9298 | 0.9521 | 1.0284 | 0.8904 | 0.9502 | 0.0290 |
| SH3BP5     | 0.8964 | 1.0127 | 0.9870 | 0.9045 | 0.9502 | 0.0292 |
| ATXN3L     | 0.9564 | 1.0028 | 0.9516 | 0.8898 | 0.9502 | 0.0232 |
| LOC1001309 | 0.9845 | 1.0240 | 0.9148 | 0.8774 | 0.9502 | 0.0331 |
| IFRG15     | 0.7746 | 1.2574 | 0.9518 | 0.8169 | 0.9502 | 0.1091 |
| C17orf103  | 0.8518 | 0.9866 | 1.0334 | 0.9290 | 0.9502 | 0.0391 |
| PMPCB      | 0.7651 | 1.4230 | 0.9566 | 0.6561 | 0.9502 | 0.1694 |

|            |        |        |        |        |        |        |
|------------|--------|--------|--------|--------|--------|--------|
| MRPL10     | 0.8601 | 1.0393 | 1.1190 | 0.7825 | 0.9502 | 0.0778 |
| LOC286444  | 0.8608 | 1.0901 | 1.0846 | 0.7655 | 0.9502 | 0.0815 |
| LOC647138  | 0.8830 | 1.0328 | 0.9405 | 0.9447 | 0.9502 | 0.0309 |
| KLRD1      | 0.9264 | 1.0012 | 0.9987 | 0.8746 | 0.9502 | 0.0306 |
| LOC648742  | 0.7387 | 1.1371 | 1.0874 | 0.8378 | 0.9502 | 0.0962 |
| DTX4       | 0.8665 | 1.0762 | 0.9619 | 0.8964 | 0.9502 | 0.0465 |
| MAP1A      | 0.8708 | 1.1389 | 0.9431 | 0.8482 | 0.9503 | 0.0661 |
| LOC646915  | 0.8738 | 1.0286 | 0.8979 | 1.0008 | 0.9503 | 0.0379 |
| LOC648041  | 0.8827 | 1.0777 | 1.0135 | 0.8272 | 0.9503 | 0.0577 |
| LOC646515  | 0.8656 | 1.0583 | 0.9296 | 0.9476 | 0.9503 | 0.0401 |
| LOC150356  | 0.7055 | 0.9789 | 1.1617 | 0.9550 | 0.9503 | 0.0937 |
| KCNK18     | 0.8495 | 0.9644 | 1.0405 | 0.9467 | 0.9503 | 0.0393 |
| LOC646445  | 0.8066 | 1.0749 | 1.0432 | 0.8764 | 0.9503 | 0.0647 |
| LOC648894  | 1.0668 | 1.0246 | 0.9518 | 0.7580 | 0.9503 | 0.0684 |
| FAM5C      | 0.9521 | 1.0701 | 0.9282 | 0.8509 | 0.9503 | 0.0454 |
| JAKMIP1    | 0.8852 | 1.0073 | 0.9845 | 0.9243 | 0.9503 | 0.0279 |
| FGA        | 0.8962 | 1.0644 | 0.9725 | 0.8682 | 0.9503 | 0.0439 |
| LOC646848  | 0.8109 | 1.0734 | 1.0406 | 0.8764 | 0.9503 | 0.0634 |
| ZBTB8OS    | 0.9055 | 1.0656 | 1.0623 | 0.7678 | 0.9503 | 0.0714 |
| RPS23      | 0.7805 | 1.2210 | 1.0818 | 0.7180 | 0.9503 | 0.1202 |
| LOC1001288 | 0.8669 | 0.9736 | 1.0642 | 0.8967 | 0.9503 | 0.0441 |
| BRD7P3     | 0.8910 | 1.0605 | 1.0172 | 0.8327 | 0.9503 | 0.0532 |
| CLEC2B     | 0.7779 | 1.0817 | 1.0951 | 0.8467 | 0.9503 | 0.0810 |
| FUBP1      | 0.7892 | 1.0737 | 1.1270 | 0.8115 | 0.9503 | 0.0874 |
| LOC728044  | 0.8200 | 1.0234 | 1.0301 | 0.9279 | 0.9504 | 0.0493 |
| LOC647134  | 1.0867 | 0.9876 | 0.9374 | 0.7898 | 0.9504 | 0.0619 |
| LOC644738  | 0.7991 | 0.9905 | 1.1504 | 0.8615 | 0.9504 | 0.0777 |
| C11orf84   | 0.9905 | 1.0099 | 1.0006 | 0.8005 | 0.9504 | 0.0501 |
| LOC646596  | 0.9531 | 0.9810 | 0.9442 | 0.9232 | 0.9504 | 0.0120 |
| SPHAR      | 0.9260 | 1.0764 | 0.9088 | 0.8902 | 0.9504 | 0.0427 |
| LOC647208  | 0.9061 | 0.9995 | 1.0382 | 0.8577 | 0.9504 | 0.0415 |
| DNAJB3     | 0.8742 | 0.9879 | 0.9877 | 0.9518 | 0.9504 | 0.0268 |
| C6orf10    | 0.9261 | 0.9630 | 0.9685 | 0.9440 | 0.9504 | 0.0097 |
| ZNF720     | 0.9720 | 1.0505 | 0.8685 | 0.9107 | 0.9504 | 0.0396 |
| KCNC4      | 0.9212 | 1.0382 | 0.9693 | 0.8729 | 0.9504 | 0.0353 |
| LOC727837  | 0.9061 | 1.0240 | 0.9335 | 0.9381 | 0.9504 | 0.0255 |
| LOC727938  | 0.8454 | 0.9137 | 1.1800 | 0.8627 | 0.9504 | 0.0779 |
| ZNF404     | 0.8185 | 1.1133 | 0.9742 | 0.8957 | 0.9504 | 0.0629 |
| LOC650975  | 0.8968 | 1.1030 | 0.9406 | 0.8613 | 0.9504 | 0.0534 |
| LOC1001298 | 0.9559 | 0.9886 | 1.0151 | 0.8421 | 0.9504 | 0.0381 |
| GPR146     | 0.8596 | 1.0413 | 0.9865 | 0.9143 | 0.9504 | 0.0399 |
| LOC641704  | 0.8282 | 1.0802 | 0.9741 | 0.9193 | 0.9504 | 0.0527 |
| CACNB2     | 0.8984 | 1.0223 | 0.9935 | 0.8876 | 0.9504 | 0.0338 |
| LOC1001316 | 0.8632 | 1.1166 | 1.0192 | 0.8028 | 0.9504 | 0.0717 |
| CEACAM5    | 0.9697 | 1.0670 | 0.9400 | 0.8250 | 0.9504 | 0.0498 |
| C21orf96   | 0.8649 | 1.0118 | 1.0682 | 0.8569 | 0.9505 | 0.0530 |

|            |        |        |        |        |        |        |
|------------|--------|--------|--------|--------|--------|--------|
| LOC1001345 | 0.8741 | 1.1305 | 0.9498 | 0.8475 | 0.9505 | 0.0638 |
| DPPA4      | 0.8791 | 1.0440 | 0.9631 | 0.9158 | 0.9505 | 0.0356 |
| LOC652070  | 0.8753 | 1.0442 | 0.9939 | 0.8887 | 0.9505 | 0.0409 |
| MAP3K5     | 0.7932 | 1.0040 | 1.1123 | 0.8926 | 0.9505 | 0.0690 |
| MTMR6      | 0.9387 | 0.9705 | 1.0895 | 0.8034 | 0.9505 | 0.0588 |
| PHOX2A     | 0.9088 | 0.9787 | 0.9719 | 0.9428 | 0.9505 | 0.0159 |
| LOC388153  | 0.9701 | 0.9286 | 0.9714 | 0.9320 | 0.9505 | 0.0117 |
| LOC729776  | 1.0394 | 1.1912 | 0.9316 | 0.6399 | 0.9505 | 0.1164 |
| LOC284009  | 0.9152 | 1.0278 | 0.8997 | 0.9596 | 0.9505 | 0.0287 |
| LOC642345  | 0.9903 | 0.9995 | 0.9144 | 0.8980 | 0.9505 | 0.0259 |
| LOC646615  | 0.8745 | 1.0222 | 0.9507 | 0.9548 | 0.9505 | 0.0302 |
| CHCHD9     | 0.8814 | 1.1688 | 1.0913 | 0.6607 | 0.9506 | 0.1141 |
| ZNF777     | 0.8755 | 1.3263 | 0.9251 | 0.6753 | 0.9506 | 0.1364 |
| SLC5A10    | 0.8602 | 1.0653 | 1.0249 | 0.8518 | 0.9506 | 0.0552 |
| ZNF689     | 0.8025 | 1.3555 | 0.9025 | 0.7418 | 0.9506 | 0.1390 |
| C6orf201   | 0.8717 | 1.1031 | 1.0227 | 0.8046 | 0.9506 | 0.0683 |
| MGC20983   | 0.8891 | 1.0271 | 1.0319 | 0.8542 | 0.9506 | 0.0461 |
| LUZP6      | 0.7043 | 1.1610 | 0.9950 | 0.9421 | 0.9506 | 0.0944 |
| LOC285550  | 0.9217 | 1.1153 | 0.9623 | 0.8031 | 0.9506 | 0.0645 |
| LOC1001330 | 0.8878 | 0.9796 | 1.0854 | 0.8496 | 0.9506 | 0.0526 |
| CHRNA1     | 0.9658 | 1.0441 | 0.9986 | 0.7939 | 0.9506 | 0.0546 |
| MC1R       | 0.9537 | 1.0636 | 0.9244 | 0.8607 | 0.9506 | 0.0424 |
| LZTS1      | 0.8627 | 1.0968 | 0.9581 | 0.8848 | 0.9506 | 0.0528 |
| LPCAT4     | 0.8739 | 1.0280 | 0.8846 | 1.0160 | 0.9506 | 0.0413 |
| NPC1       | 0.6356 | 1.3927 | 1.0669 | 0.7073 | 0.9506 | 0.1750 |
| USP32      | 0.8563 | 1.1342 | 0.9477 | 0.8642 | 0.9506 | 0.0646 |
| LOC728975  | 0.9060 | 1.0420 | 0.9594 | 0.8952 | 0.9506 | 0.0335 |
| LOC643900  | 0.9496 | 1.0313 | 1.0567 | 0.7649 | 0.9506 | 0.0660 |
| LOC728340  | 0.8541 | 0.9795 | 1.0362 | 0.9327 | 0.9506 | 0.0385 |
| COPZ2      | 0.9395 | 0.9600 | 0.9487 | 0.9544 | 0.9506 | 0.0044 |
| KIAA1009   | 0.8472 | 1.1411 | 1.0224 | 0.7918 | 0.9506 | 0.0803 |
| LOC645513  | 0.9677 | 1.0167 | 0.9794 | 0.8388 | 0.9506 | 0.0387 |
| METT5D1    | 0.8615 | 1.2273 | 0.9200 | 0.7938 | 0.9506 | 0.0957 |
| ARHGAP18   | 0.9737 | 1.0502 | 0.9099 | 0.8688 | 0.9507 | 0.0396 |
| FLJ36701   | 0.8919 | 1.0093 | 1.0543 | 0.8472 | 0.9507 | 0.0486 |
| LHX4       | 0.9103 | 1.0503 | 1.0445 | 0.7976 | 0.9507 | 0.0604 |
| SCARNA16   | 0.8479 | 1.0195 | 1.0702 | 0.8651 | 0.9507 | 0.0555 |
| LOC647225  | 0.9994 | 1.0141 | 0.8911 | 0.8981 | 0.9507 | 0.0325 |
| POM121L1P  | 0.8265 | 1.1547 | 0.9312 | 0.8903 | 0.9507 | 0.0713 |
| CA7        | 0.9250 | 0.9679 | 1.0053 | 0.9046 | 0.9507 | 0.0225 |
| ATP2B3     | 0.9392 | 1.0021 | 0.9833 | 0.8782 | 0.9507 | 0.0275 |
| LOC644326  | 0.9719 | 1.0222 | 0.9387 | 0.8699 | 0.9507 | 0.0319 |
| FLJ14166   | 0.8404 | 1.0995 | 1.0176 | 0.8453 | 0.9507 | 0.0645 |
| LOC652640  | 0.8769 | 0.9704 | 1.0513 | 0.9041 | 0.9507 | 0.0389 |
| LOC1001329 | 0.9199 | 0.9702 | 0.9018 | 1.0110 | 0.9507 | 0.0248 |
| LOC728089  | 0.8418 | 1.0244 | 0.9632 | 0.9734 | 0.9507 | 0.0387 |

|            |        |        |        |        |        |        |
|------------|--------|--------|--------|--------|--------|--------|
| SYT9       | 0.9595 | 1.0183 | 0.9667 | 0.8584 | 0.9507 | 0.0334 |
| AOC2       | 0.9620 | 1.0236 | 0.9833 | 0.8339 | 0.9507 | 0.0410 |
| LOC221442  | 0.8039 | 1.0239 | 0.9875 | 0.9876 | 0.9507 | 0.0497 |
| LOC1001341 | 0.8863 | 0.9978 | 0.9771 | 0.9417 | 0.9507 | 0.0244 |
| LOC642147  | 0.8156 | 0.9897 | 1.0895 | 0.9080 | 0.9507 | 0.0584 |
| LOC641929  | 0.9488 | 1.0051 | 1.0012 | 0.8478 | 0.9507 | 0.0366 |
| C17orf70   | 0.8527 | 1.4579 | 0.8196 | 0.6727 | 0.9507 | 0.1735 |
| LOC644225  | 0.8954 | 0.9258 | 1.0031 | 0.9786 | 0.9507 | 0.0245 |
| MIR513A2   | 0.9249 | 1.0024 | 0.9539 | 0.9217 | 0.9507 | 0.0187 |
| IFI30      | 0.9472 | 1.0511 | 0.9700 | 0.8346 | 0.9507 | 0.0447 |
| LOC646554  | 0.8519 | 0.9750 | 1.0139 | 0.9622 | 0.9507 | 0.0347 |
| DCLK1      | 0.9496 | 0.9867 | 0.9861 | 0.8807 | 0.9507 | 0.0249 |
| LOC648704  | 0.8895 | 1.0157 | 1.0062 | 0.8915 | 0.9507 | 0.0348 |
| FAM176A    | 0.9268 | 1.0458 | 0.9678 | 0.8626 | 0.9508 | 0.0384 |
| COL7A1     | 1.0275 | 1.0146 | 0.9508 | 0.8101 | 0.9508 | 0.0498 |
| LOC642995  | 0.8916 | 1.0394 | 0.9358 | 0.9363 | 0.9508 | 0.0313 |
| LOC644732  | 0.8373 | 1.1138 | 0.9052 | 0.9468 | 0.9508 | 0.0589 |
| SMC1A      | 0.9381 | 0.9892 | 0.9550 | 0.9207 | 0.9508 | 0.0146 |
| C1orf158   | 0.9074 | 1.1151 | 0.8681 | 0.9125 | 0.9508 | 0.0557 |
| NPAS2      | 0.9096 | 1.0926 | 0.9394 | 0.8616 | 0.9508 | 0.0499 |
| RGMA       | 1.0184 | 0.9819 | 0.8650 | 0.9378 | 0.9508 | 0.0330 |
| LOC647015  | 1.0113 | 0.9793 | 1.0201 | 0.7924 | 0.9508 | 0.0535 |
| RPL36AL    | 0.7771 | 1.3521 | 1.0210 | 0.6530 | 0.9508 | 0.1541 |
| IFIT5      | 0.8683 | 1.2022 | 0.8841 | 0.8487 | 0.9508 | 0.0841 |
| LOC1001302 | 0.9548 | 1.0431 | 0.9672 | 0.8380 | 0.9508 | 0.0424 |
| EIF6       | 0.8207 | 1.3575 | 0.9999 | 0.6251 | 0.9508 | 0.1557 |
| LOC649182  | 0.8788 | 1.0371 | 0.9246 | 0.9627 | 0.9508 | 0.0335 |
| SNORA70B   | 0.8782 | 1.0601 | 1.0038 | 0.8611 | 0.9508 | 0.0484 |
| ZNF192     | 0.8934 | 1.1131 | 0.9913 | 0.8055 | 0.9508 | 0.0661 |
| DNAJC25    | 0.8525 | 1.2850 | 1.0320 | 0.6338 | 0.9508 | 0.1380 |
| LOC652204  | 0.8679 | 0.9691 | 1.0042 | 0.9621 | 0.9508 | 0.0291 |
| P2RY14     | 0.8823 | 1.0130 | 0.9969 | 0.9110 | 0.9508 | 0.0320 |
| KIAA0754   | 0.9200 | 0.9701 | 0.9308 | 0.9825 | 0.9508 | 0.0151 |
| LOC253724  | 0.9426 | 0.9990 | 1.0144 | 0.8474 | 0.9508 | 0.0378 |
| MTMR10     | 0.8167 | 1.4471 | 0.8854 | 0.6542 | 0.9508 | 0.1724 |
| LOC646566  | 0.9142 | 1.0538 | 1.0025 | 0.8329 | 0.9509 | 0.0487 |
| LOC646074  | 0.9786 | 1.0691 | 0.9018 | 0.8540 | 0.9509 | 0.0470 |
| LOC643757  | 0.8932 | 0.9929 | 0.9384 | 0.9789 | 0.9509 | 0.0224 |
| LOC642515  | 0.9294 | 1.0408 | 1.0023 | 0.8310 | 0.9509 | 0.0461 |
| LOC728783  | 0.9711 | 1.0046 | 0.9478 | 0.8801 | 0.9509 | 0.0263 |
| LOC1001343 | 0.8603 | 1.0960 | 0.9334 | 0.9138 | 0.9509 | 0.0508 |
| LOC644994  | 0.8560 | 0.9895 | 1.0350 | 0.9230 | 0.9509 | 0.0391 |
| SNORD42B   | 0.9069 | 1.0986 | 0.9968 | 0.8012 | 0.9509 | 0.0634 |
| CASP5      | 0.8943 | 1.0332 | 1.0053 | 0.8707 | 0.9509 | 0.0402 |
| TMEM90A    | 0.9742 | 1.0182 | 0.9054 | 0.9058 | 0.9509 | 0.0277 |
| BTLA       | 0.9384 | 1.1089 | 0.8760 | 0.8802 | 0.9509 | 0.0546 |

|            |        |        |        |        |        |        |
|------------|--------|--------|--------|--------|--------|--------|
| MIR718     | 1.0369 | 0.9559 | 0.9494 | 0.8613 | 0.9509 | 0.0359 |
| LOC339562  | 0.8551 | 1.0160 | 0.9880 | 0.9444 | 0.9509 | 0.0352 |
| SOX5       | 0.9974 | 0.9507 | 0.9791 | 0.8764 | 0.9509 | 0.0266 |
| CTNND1     | 0.8626 | 1.1108 | 0.9545 | 0.8757 | 0.9509 | 0.0570 |
| ERCC-00057 | 1.0461 | 0.9559 | 0.9861 | 0.8154 | 0.9509 | 0.0489 |
| GJA9       | 0.9612 | 1.0677 | 0.9709 | 0.8039 | 0.9509 | 0.0546 |
| LRRC43     | 0.9258 | 1.0588 | 0.9463 | 0.8728 | 0.9509 | 0.0391 |
| FLJ43879   | 0.9491 | 1.0272 | 0.9362 | 0.8912 | 0.9509 | 0.0283 |
| LOC642450  | 0.9380 | 0.9726 | 1.0444 | 0.8488 | 0.9509 | 0.0406 |
| PGLYRP4    | 0.8832 | 1.1599 | 0.9094 | 0.8513 | 0.9509 | 0.0707 |
| PRKD3      | 0.8528 | 1.1873 | 0.9693 | 0.7945 | 0.9510 | 0.0868 |
| KRT18P26   | 0.9163 | 1.0392 | 0.9608 | 0.8875 | 0.9510 | 0.0331 |
| LOC1001346 | 0.9705 | 1.0284 | 0.8827 | 0.9222 | 0.9510 | 0.0314 |
| LATS1      | 0.9231 | 1.0377 | 0.9451 | 0.8978 | 0.9510 | 0.0305 |
| SCN1B      | 0.9195 | 1.0508 | 0.9938 | 0.8397 | 0.9510 | 0.0458 |
| LOC644003  | 0.8973 | 1.0274 | 1.0027 | 0.8764 | 0.9510 | 0.0376 |
| LOC652880  | 0.9489 | 0.9693 | 0.9770 | 0.9087 | 0.9510 | 0.0153 |
| TTY17A     | 0.8405 | 1.0545 | 1.0039 | 0.9050 | 0.9510 | 0.0482 |
| CD247      | 0.8646 | 1.0280 | 1.0242 | 0.8872 | 0.9510 | 0.0436 |
| LOC647468  | 0.9165 | 0.9627 | 1.0589 | 0.8658 | 0.9510 | 0.0411 |
| FBXW8      | 0.9386 | 1.0641 | 0.9367 | 0.8646 | 0.9510 | 0.0415 |
| BPIL1      | 0.8676 | 1.0020 | 0.9921 | 0.9424 | 0.9510 | 0.0307 |
| LOC642505  | 0.9114 | 0.9956 | 0.9956 | 0.9015 | 0.9510 | 0.0258 |
| USP45      | 0.9167 | 1.0518 | 0.9599 | 0.8758 | 0.9510 | 0.0377 |
| LOC653353  | 0.8906 | 0.9819 | 1.0669 | 0.8647 | 0.9510 | 0.0461 |
| MYO15B     | 0.8819 | 0.9893 | 0.9533 | 0.9797 | 0.9510 | 0.0243 |
| RNU6ATAC   | 0.7468 | 1.1994 | 1.0485 | 0.8095 | 0.9510 | 0.1052 |
| LOC650323  | 0.9941 | 0.9489 | 0.9114 | 0.9498 | 0.9511 | 0.0169 |
| CDC20B     | 1.0433 | 1.0161 | 0.8664 | 0.8785 | 0.9511 | 0.0458 |
| GDPD2      | 0.8694 | 1.0993 | 0.9216 | 0.9142 | 0.9511 | 0.0507 |
| LOC643995  | 0.8166 | 1.0869 | 1.0022 | 0.8987 | 0.9511 | 0.0591 |
| LOC439945  | 0.9780 | 1.0195 | 0.9383 | 0.8686 | 0.9511 | 0.0321 |
| HECW2      | 0.8848 | 1.1246 | 0.8902 | 0.9050 | 0.9512 | 0.0580 |
| LOC653216  | 0.9149 | 1.0433 | 1.0122 | 0.8342 | 0.9512 | 0.0476 |
| KIAA1026   | 0.8682 | 1.0466 | 0.9991 | 0.8908 | 0.9512 | 0.0428 |
| OR8B12     | 1.0224 | 1.0857 | 0.9038 | 0.7928 | 0.9512 | 0.0649 |
| SLAMF9     | 0.8417 | 1.1605 | 0.9118 | 0.8907 | 0.9512 | 0.0713 |
| GOLIM4     | 0.7993 | 1.2519 | 0.9127 | 0.8408 | 0.9512 | 0.1030 |
| CYB5R4     | 0.7954 | 1.2473 | 1.0381 | 0.7239 | 0.9512 | 0.1194 |
| LMAN2      | 0.7563 | 1.2420 | 0.8617 | 0.9447 | 0.9512 | 0.1043 |
| PAQR6      | 0.9791 | 0.9903 | 0.9773 | 0.8581 | 0.9512 | 0.0312 |
| LOC339902  | 0.8865 | 0.9980 | 0.9552 | 0.9651 | 0.9512 | 0.0234 |
| LOC649683  | 0.9228 | 1.0592 | 0.9617 | 0.8611 | 0.9512 | 0.0415 |
| LOC646782  | 0.9081 | 1.0597 | 0.9921 | 0.8449 | 0.9512 | 0.0471 |
| ATP6V1E2   | 0.9449 | 1.1812 | 0.9608 | 0.7180 | 0.9512 | 0.0946 |
| C10orf50   | 0.8641 | 1.0211 | 0.9958 | 0.9239 | 0.9512 | 0.0356 |

|            |        |        |        |        |        |        |
|------------|--------|--------|--------|--------|--------|--------|
| LOC730964  | 0.8810 | 1.0358 | 0.9589 | 0.9292 | 0.9512 | 0.0324 |
| LOC645210  | 0.9891 | 1.0084 | 0.9010 | 0.9064 | 0.9512 | 0.0277 |
| POLR2B     | 0.7373 | 1.2563 | 1.0872 | 0.7242 | 0.9512 | 0.1319 |
| RNF169     | 0.8242 | 1.2277 | 0.7460 | 1.0071 | 0.9512 | 0.1072 |
| SNORD73A   | 0.9629 | 1.0647 | 0.9226 | 0.8548 | 0.9513 | 0.0439 |
| GPT        | 0.8939 | 1.1082 | 0.9942 | 0.8087 | 0.9513 | 0.0646 |
| LOC1001310 | 0.8568 | 1.0227 | 0.9941 | 0.9315 | 0.9513 | 0.0368 |
| SPEN       | 0.7905 | 1.3697 | 0.9457 | 0.6992 | 0.9513 | 0.1485 |
| LOC651167  | 0.8316 | 1.0419 | 1.0576 | 0.8739 | 0.9513 | 0.0576 |
| TLR9       | 0.8269 | 1.0580 | 1.0273 | 0.8930 | 0.9513 | 0.0548 |
| LOC1001323 | 0.6013 | 1.0505 | 1.1240 | 1.0293 | 0.9513 | 0.1184 |
| PTPRN2     | 1.0189 | 0.9367 | 0.9532 | 0.8963 | 0.9513 | 0.0255 |
| MIR587     | 0.9515 | 0.9110 | 0.9838 | 0.9590 | 0.9513 | 0.0151 |
| C20orf173  | 0.9626 | 1.0714 | 0.9301 | 0.8411 | 0.9513 | 0.0475 |
| MIR7-3     | 0.8999 | 1.0389 | 0.9849 | 0.8815 | 0.9513 | 0.0369 |
| TNKS       | 0.8735 | 1.0787 | 0.9180 | 0.9350 | 0.9513 | 0.0444 |
| GPA33      | 0.8759 | 1.0132 | 1.0390 | 0.8772 | 0.9513 | 0.0435 |
| SYVN1      | 0.8876 | 1.3039 | 0.8862 | 0.7276 | 0.9513 | 0.1234 |
| LOC653424  | 0.8506 | 1.0653 | 0.9579 | 0.9315 | 0.9513 | 0.0443 |
| LOC646085  | 0.9505 | 0.9476 | 0.9429 | 0.9643 | 0.9513 | 0.0046 |
| LOC728519  | 0.8530 | 1.2383 | 0.9086 | 0.8055 | 0.9513 | 0.0979 |
| GOLGA7B    | 0.8821 | 1.0510 | 1.0247 | 0.8475 | 0.9513 | 0.0507 |
| ZNF335     | 0.9593 | 1.0998 | 0.9242 | 0.8221 | 0.9513 | 0.0574 |
| SCGN       | 0.8802 | 1.0583 | 1.0108 | 0.8560 | 0.9513 | 0.0493 |
| OTP        | 0.8596 | 1.0390 | 0.9970 | 0.9098 | 0.9513 | 0.0407 |
| LOC646908  | 0.8684 | 1.1360 | 0.9884 | 0.8126 | 0.9514 | 0.0717 |
| SNORA78    | 0.8445 | 1.0405 | 0.9106 | 1.0098 | 0.9514 | 0.0451 |
| MIR648     | 0.8491 | 1.0206 | 0.9998 | 0.9361 | 0.9514 | 0.0385 |
| TMEM16C    | 0.8358 | 1.0410 | 0.9947 | 0.9340 | 0.9514 | 0.0443 |
| MAGOHB     | 0.9412 | 0.9219 | 0.9709 | 0.9715 | 0.9514 | 0.0121 |
| ACAP1      | 0.8755 | 1.0298 | 0.9428 | 0.9575 | 0.9514 | 0.0317 |
| HLA-G      | 0.9367 | 1.0393 | 1.0126 | 0.8171 | 0.9514 | 0.0498 |
| LOC391771  | 0.9356 | 0.9877 | 0.9746 | 0.9077 | 0.9514 | 0.0183 |
| ZFP92      | 0.8610 | 1.0493 | 0.9947 | 0.9006 | 0.9514 | 0.0430 |
| A26C3      | 0.9143 | 1.0932 | 1.0013 | 0.7970 | 0.9514 | 0.0631 |
| LOC648874  | 0.8779 | 1.1333 | 0.9237 | 0.8708 | 0.9514 | 0.0617 |
| ZNF3       | 0.8780 | 1.1624 | 0.9632 | 0.8020 | 0.9514 | 0.0777 |
| LOC442366  | 0.9074 | 1.1038 | 0.9511 | 0.8433 | 0.9514 | 0.0554 |
| C1orf118   | 0.8401 | 1.0389 | 0.9980 | 0.9287 | 0.9514 | 0.0435 |
| PCDHGA1    | 0.9090 | 1.0363 | 0.9286 | 0.9318 | 0.9514 | 0.0288 |
| RPIA       | 0.8378 | 1.0944 | 1.1345 | 0.7391 | 0.9514 | 0.0966 |
| LOC728417  | 0.8521 | 1.1268 | 0.9685 | 0.8584 | 0.9514 | 0.0643 |
| ZC3H15     | 0.9246 | 1.1716 | 1.1005 | 0.6091 | 0.9514 | 0.1254 |
| ZNF658     | 0.8737 | 1.0926 | 0.9917 | 0.8478 | 0.9515 | 0.0565 |
| LOC647003  | 0.9619 | 1.0339 | 0.9468 | 0.8632 | 0.9515 | 0.0350 |
| GNAI1      | 0.9563 | 1.0936 | 0.9208 | 0.8352 | 0.9515 | 0.0538 |



|            |        |        |        |        |        |        |
|------------|--------|--------|--------|--------|--------|--------|
| LOC729319  | 0.9135 | 0.9488 | 1.0165 | 0.9271 | 0.9515 | 0.0229 |
| LOC1001282 | 0.9095 | 1.0819 | 0.8435 | 0.9710 | 0.9515 | 0.0507 |
| LOC644319  | 0.9054 | 1.0273 | 1.0128 | 0.8605 | 0.9515 | 0.0407 |
| CPNE9      | 0.9550 | 1.0406 | 0.9943 | 0.8160 | 0.9515 | 0.0484 |
| RHBDL3     | 0.9268 | 0.9908 | 0.9575 | 0.9309 | 0.9515 | 0.0148 |
| RABGGTA    | 0.9188 | 1.2363 | 0.8655 | 0.7853 | 0.9515 | 0.0988 |
| LOC644288  | 0.8817 | 0.9512 | 1.0134 | 0.9597 | 0.9515 | 0.0271 |
| KLF8       | 0.9246 | 1.0777 | 0.9601 | 0.8436 | 0.9515 | 0.0486 |
| ACTRT2     | 0.9382 | 0.8966 | 1.0273 | 0.9439 | 0.9515 | 0.0274 |
| PLEK2      | 0.9304 | 1.0417 | 1.0064 | 0.8275 | 0.9515 | 0.0474 |
| CD177      | 0.8821 | 1.0319 | 0.9838 | 0.9084 | 0.9515 | 0.0344 |
| LOC392262  | 0.8603 | 1.0924 | 0.9457 | 0.9078 | 0.9515 | 0.0501 |
| IQCG       | 0.8469 | 1.1379 | 0.9834 | 0.8380 | 0.9515 | 0.0705 |
| MAB21L1    | 0.8332 | 1.0812 | 1.0344 | 0.8573 | 0.9515 | 0.0623 |
| C20orf133  | 0.9282 | 0.9972 | 0.9918 | 0.8890 | 0.9515 | 0.0261 |
| AKAP3      | 0.8902 | 1.0281 | 1.0003 | 0.8875 | 0.9515 | 0.0366 |
| CMTM1      | 0.9330 | 1.0087 | 0.9528 | 0.9116 | 0.9515 | 0.0208 |
| LOC1001348 | 0.8643 | 1.0676 | 1.0154 | 0.8588 | 0.9515 | 0.0530 |
| GABRA5     | 0.8764 | 1.0651 | 1.0198 | 0.8449 | 0.9515 | 0.0537 |
| CASQ1      | 0.8736 | 1.1319 | 0.9808 | 0.8199 | 0.9515 | 0.0688 |
| LOC642938  | 0.9184 | 1.0622 | 0.9402 | 0.8855 | 0.9516 | 0.0385 |
| LOC642761  | 0.8432 | 1.0835 | 0.9906 | 0.8889 | 0.9516 | 0.0537 |
| ATXN1      | 0.9117 | 1.1025 | 1.0191 | 0.7729 | 0.9516 | 0.0712 |
| LOC284276  | 0.9445 | 1.0698 | 0.8714 | 0.9206 | 0.9516 | 0.0422 |
| TAS2R60    | 0.8650 | 1.0290 | 1.0353 | 0.8769 | 0.9516 | 0.0466 |
| LOC729396  | 0.9305 | 0.9946 | 1.0194 | 0.8618 | 0.9516 | 0.0353 |
| CASC2      | 0.8309 | 1.0988 | 1.0247 | 0.8518 | 0.9516 | 0.0655 |
| LOC1001290 | 0.9638 | 0.9557 | 1.0221 | 0.8646 | 0.9516 | 0.0325 |
| LOC645476  | 0.8751 | 1.0515 | 0.9894 | 0.8903 | 0.9516 | 0.0419 |
| COL21A1    | 0.9245 | 0.9682 | 1.0850 | 0.8287 | 0.9516 | 0.0532 |
| HOXC11     | 0.9246 | 1.0296 | 0.9499 | 0.9023 | 0.9516 | 0.0278 |
| LOC1001332 | 0.9264 | 0.9691 | 1.0047 | 0.9061 | 0.9516 | 0.0220 |
| NPNT       | 0.9499 | 1.1142 | 1.0142 | 0.7281 | 0.9516 | 0.0818 |
| ERCC-00040 | 0.8446 | 1.0040 | 1.1336 | 0.8243 | 0.9516 | 0.0728 |
| CATSPER4   | 0.9110 | 1.1569 | 0.9058 | 0.8328 | 0.9516 | 0.0707 |
| LOC1001290 | 0.8403 | 1.1625 | 0.9592 | 0.8445 | 0.9516 | 0.0755 |
| LOC154822  | 0.8584 | 1.0316 | 0.9930 | 0.9235 | 0.9516 | 0.0383 |
| LOC442423  | 0.8694 | 1.1404 | 0.9507 | 0.8461 | 0.9516 | 0.0668 |
| ZNF137     | 0.8285 | 1.0928 | 1.0349 | 0.8503 | 0.9516 | 0.0660 |
| RFFL       | 0.9186 | 1.1809 | 0.9283 | 0.7788 | 0.9516 | 0.0837 |
| LOC644800  | 0.8715 | 0.9534 | 1.0221 | 0.9596 | 0.9516 | 0.0309 |
| FCER1A     | 0.9851 | 0.9643 | 1.1096 | 0.7476 | 0.9517 | 0.0752 |
| SHOX       | 0.8873 | 1.0289 | 0.9555 | 0.9349 | 0.9517 | 0.0294 |
| TTTY4B     | 0.8952 | 1.0198 | 0.9479 | 0.9438 | 0.9517 | 0.0257 |
| LOC374973  | 0.8316 | 1.1115 | 0.9490 | 0.9146 | 0.9517 | 0.0587 |
| LOC391045  | 0.8223 | 1.1213 | 0.9470 | 0.9161 | 0.9517 | 0.0625 |

|            |        |        |        |        |        |        |
|------------|--------|--------|--------|--------|--------|--------|
| FAIM2      | 0.9145 | 1.0859 | 0.9627 | 0.8437 | 0.9517 | 0.0510 |
| LOC1001285 | 0.8324 | 1.0164 | 0.9950 | 0.9630 | 0.9517 | 0.0412 |
| LOC648200  | 0.8657 | 1.0642 | 1.0158 | 0.8611 | 0.9517 | 0.0519 |
| FGF17      | 0.8834 | 1.0549 | 1.0014 | 0.8669 | 0.9517 | 0.0456 |
| LOC728664  | 0.7878 | 1.0827 | 1.0395 | 0.8968 | 0.9517 | 0.0676 |
| FLJ44076   | 0.9064 | 1.0899 | 0.9318 | 0.8786 | 0.9517 | 0.0473 |
| COL25A1    | 0.9083 | 1.0547 | 0.9730 | 0.8708 | 0.9517 | 0.0403 |
| LOC650257  | 0.9310 | 1.0505 | 0.9364 | 0.8888 | 0.9517 | 0.0346 |
| KLHL4      | 0.9380 | 0.9744 | 0.9776 | 0.9169 | 0.9517 | 0.0147 |
| KIF18B     | 0.8587 | 1.0445 | 1.0259 | 0.8778 | 0.9517 | 0.0485 |
| SPAG4      | 1.0326 | 1.0767 | 0.8884 | 0.8091 | 0.9517 | 0.0623 |
| OR13D1     | 0.9057 | 1.0595 | 0.9354 | 0.9062 | 0.9517 | 0.0366 |
| DCAF12L2   | 0.9991 | 1.0655 | 0.9631 | 0.7792 | 0.9517 | 0.0613 |
| LOC389120  | 0.9537 | 0.9403 | 1.0423 | 0.8706 | 0.9517 | 0.0353 |
| RAB3GAP1   | 0.8794 | 1.2094 | 0.9696 | 0.7485 | 0.9517 | 0.0971 |
| LOC1001298 | 0.8895 | 1.0792 | 0.9690 | 0.8693 | 0.9517 | 0.0476 |
| MIR181A2   | 0.9268 | 1.0465 | 0.9802 | 0.8534 | 0.9517 | 0.0409 |
| LOC440277  | 1.0002 | 0.8740 | 1.0675 | 0.8653 | 0.9517 | 0.0494 |
| GIMAP6     | 0.9516 | 1.0206 | 0.9836 | 0.8512 | 0.9517 | 0.0364 |
| CXorf30    | 0.9502 | 1.0314 | 0.9454 | 0.8800 | 0.9517 | 0.0310 |
| ACCN2      | 0.8569 | 1.1505 | 0.9554 | 0.8442 | 0.9517 | 0.0708 |
| MIR545     | 0.9382 | 0.9971 | 1.0032 | 0.8684 | 0.9517 | 0.0314 |
| LOC641787  | 0.9558 | 0.9812 | 0.9189 | 0.9511 | 0.9518 | 0.0128 |
| SDC4P      | 0.9000 | 1.0713 | 0.9386 | 0.8972 | 0.9518 | 0.0409 |
| SNORD123   | 0.9556 | 1.0409 | 0.9565 | 0.8540 | 0.9518 | 0.0382 |
| LOC648283  | 0.9355 | 1.1350 | 0.9146 | 0.8221 | 0.9518 | 0.0659 |
| DERL3      | 0.9270 | 1.0767 | 1.0046 | 0.7989 | 0.9518 | 0.0594 |
| LOC731682  | 0.9559 | 1.0135 | 0.9410 | 0.8967 | 0.9518 | 0.0241 |
| SUPT5H     | 0.9520 | 1.2035 | 0.8824 | 0.7693 | 0.9518 | 0.0920 |
| GPR158L1   | 0.8465 | 1.0270 | 1.0340 | 0.8996 | 0.9518 | 0.0467 |
| LOC1001284 | 0.8875 | 0.9774 | 1.0742 | 0.8681 | 0.9518 | 0.0472 |
| FAM41AY2   | 1.0100 | 0.9967 | 0.9794 | 0.8210 | 0.9518 | 0.0441 |
| FAM160B2   | 0.8956 | 1.1346 | 1.0446 | 0.7324 | 0.9518 | 0.0882 |
| LOC649214  | 0.9291 | 0.8895 | 1.0804 | 0.9083 | 0.9518 | 0.0436 |
| AMAC1L3    | 1.0000 | 1.0160 | 0.9277 | 0.8636 | 0.9518 | 0.0351 |
| LOC390564  | 0.9347 | 1.0736 | 0.9966 | 0.8024 | 0.9518 | 0.0573 |
| PCDHGA2    | 0.8878 | 1.0321 | 0.9895 | 0.8980 | 0.9518 | 0.0352 |
| LOC1001328 | 0.8487 | 1.0662 | 1.0394 | 0.8529 | 0.9518 | 0.0586 |
| LOC391334  | 0.9119 | 1.0844 | 1.0103 | 0.8007 | 0.9518 | 0.0615 |
| UBTF       | 0.9527 | 1.1131 | 0.9671 | 0.7744 | 0.9518 | 0.0694 |
| LOC1001279 | 0.9210 | 0.9302 | 1.0490 | 0.9073 | 0.9519 | 0.0327 |
| LOC400836  | 0.8599 | 1.0494 | 1.0765 | 0.8216 | 0.9519 | 0.0649 |
| LOC728162  | 0.9737 | 0.9559 | 1.0467 | 0.8311 | 0.9519 | 0.0448 |
| SPATA19    | 0.9104 | 1.0024 | 0.9200 | 0.9746 | 0.9519 | 0.0220 |
| LOC730379  | 0.9576 | 1.0509 | 0.8827 | 0.9163 | 0.9519 | 0.0364 |
| LOC647949  | 1.0235 | 0.9648 | 0.9690 | 0.8503 | 0.9519 | 0.0364 |

|            |        |        |        |        |        |        |
|------------|--------|--------|--------|--------|--------|--------|
| ATP8B4     | 0.8987 | 1.2420 | 0.9135 | 0.7533 | 0.9519 | 0.1032 |
| LOC392481  | 0.8869 | 1.0251 | 0.9982 | 0.8974 | 0.9519 | 0.0350 |
| PRPS1      | 0.8948 | 1.2740 | 1.0203 | 0.6186 | 0.9519 | 0.1363 |
| RAB2B      | 0.8438 | 1.2217 | 0.9569 | 0.7852 | 0.9519 | 0.0967 |
| C9orf144   | 0.9194 | 0.9440 | 1.0309 | 0.9134 | 0.9519 | 0.0271 |
| LOC1001311 | 0.9118 | 1.0572 | 0.8560 | 0.9827 | 0.9519 | 0.0436 |
| TCF1       | 0.8653 | 1.0051 | 0.9328 | 1.0045 | 0.9519 | 0.0335 |
| MS4A14     | 0.8685 | 1.0924 | 0.9598 | 0.8869 | 0.9519 | 0.0508 |
| IL20RB     | 0.9155 | 1.0925 | 0.9133 | 0.8863 | 0.9519 | 0.0473 |
| LOC643897  | 0.8089 | 1.0744 | 1.0062 | 0.9182 | 0.9519 | 0.0574 |
| LOC1001285 | 0.7274 | 1.3901 | 1.0285 | 0.6618 | 0.9519 | 0.1664 |
| TMEM103    | 0.8732 | 0.9771 | 1.0099 | 0.9476 | 0.9519 | 0.0292 |
| FLJ22662   | 0.9629 | 1.0743 | 0.9312 | 0.8393 | 0.9519 | 0.0485 |
| TM7SF4     | 0.9406 | 1.0176 | 0.9942 | 0.8553 | 0.9519 | 0.0360 |
| LOC654252  | 0.9196 | 1.0010 | 0.9767 | 0.9104 | 0.9519 | 0.0220 |
| LOC647451  | 0.8917 | 1.0779 | 1.0087 | 0.8294 | 0.9519 | 0.0561 |
| UVRAG      | 0.8542 | 1.2434 | 0.9388 | 0.7713 | 0.9519 | 0.1030 |
| LOC284948  | 0.8398 | 1.0003 | 0.9366 | 1.0311 | 0.9520 | 0.0423 |
| RALGPS1    | 0.8732 | 1.3144 | 0.8718 | 0.7485 | 0.9520 | 0.1243 |
| GPR82      | 0.9278 | 1.0425 | 1.0220 | 0.8156 | 0.9520 | 0.0519 |
| DSCR9      | 0.8977 | 1.0191 | 1.0368 | 0.8543 | 0.9520 | 0.0449 |
| LOC352909  | 0.9000 | 1.0631 | 0.9628 | 0.8821 | 0.9520 | 0.0409 |
| DHRS7C     | 0.8958 | 1.0678 | 1.0167 | 0.8276 | 0.9520 | 0.0549 |
| KRTAP9-8   | 0.8827 | 1.0938 | 1.0060 | 0.8254 | 0.9520 | 0.0605 |
| LOC730060  | 0.9202 | 0.9610 | 1.0618 | 0.8649 | 0.9520 | 0.0416 |
| KATNAL1    | 0.9062 | 1.0882 | 0.9559 | 0.8578 | 0.9520 | 0.0496 |
| OR3A2      | 0.9676 | 1.0080 | 0.8955 | 0.9370 | 0.9520 | 0.0238 |
| MDFIC      | 0.8644 | 1.0627 | 0.9786 | 0.9023 | 0.9520 | 0.0439 |
| SLC9A11    | 0.9594 | 0.9546 | 0.9837 | 0.9103 | 0.9520 | 0.0153 |
| LOC731486  | 1.0041 | 0.9729 | 0.9657 | 0.8655 | 0.9520 | 0.0300 |
| GRIA3      | 0.8851 | 1.0745 | 0.9789 | 0.8697 | 0.9520 | 0.0474 |
| LOC648069  | 0.8614 | 1.1218 | 0.9414 | 0.8834 | 0.9520 | 0.0591 |
| RBM19      | 0.9183 | 1.1035 | 0.8895 | 0.8968 | 0.9520 | 0.0509 |
| ALKBH3     | 0.9467 | 1.2434 | 0.9447 | 0.6734 | 0.9520 | 0.1164 |
| JOSD2      | 0.8626 | 1.1220 | 0.9609 | 0.8626 | 0.9520 | 0.0612 |
| SALL3      | 0.9183 | 1.0157 | 0.9745 | 0.8997 | 0.9520 | 0.0265 |
| FAM100B    | 0.9079 | 1.0811 | 0.8959 | 0.9232 | 0.9520 | 0.0434 |
| LOC442446  | 0.8660 | 0.9780 | 1.0143 | 0.9500 | 0.9520 | 0.0316 |
| UGP2       | 0.8664 | 1.2645 | 0.9226 | 0.7548 | 0.9521 | 0.1098 |
| ARID3C     | 0.9221 | 1.0737 | 0.9846 | 0.8279 | 0.9521 | 0.0518 |
| FOXH1      | 0.8367 | 1.1358 | 0.9986 | 0.8370 | 0.9521 | 0.0722 |
| CHRNA3     | 0.8809 | 1.0052 | 1.0236 | 0.8985 | 0.9521 | 0.0364 |
| FLJ41733   | 0.8978 | 1.0133 | 0.9650 | 0.9322 | 0.9521 | 0.0246 |
| SELE       | 0.9161 | 1.0710 | 0.9622 | 0.8591 | 0.9521 | 0.0449 |
| LOC1001330 | 0.9545 | 1.0395 | 0.9098 | 0.9044 | 0.9521 | 0.0312 |
| LCTL       | 0.7983 | 1.1033 | 0.9753 | 0.9314 | 0.9521 | 0.0629 |

|            |        |        |        |        |        |        |
|------------|--------|--------|--------|--------|--------|--------|
| LOC643686  | 0.7752 | 1.1018 | 1.1107 | 0.8206 | 0.9521 | 0.0895 |
| LOC642118  | 0.9784 | 1.0588 | 0.8691 | 0.9020 | 0.9521 | 0.0423 |
| LOC1001322 | 0.8910 | 1.0955 | 0.9675 | 0.8543 | 0.9521 | 0.0533 |
| LOC389830  | 0.9066 | 1.0212 | 0.9851 | 0.8955 | 0.9521 | 0.0305 |
| BCAS3      | 0.8831 | 1.0082 | 0.9500 | 0.9671 | 0.9521 | 0.0260 |
| ACSF2      | 0.9917 | 1.0526 | 1.0191 | 0.7449 | 0.9521 | 0.0702 |
| LOC644267  | 0.9320 | 1.0352 | 0.9854 | 0.8557 | 0.9521 | 0.0384 |
| SERPINA11  | 0.9853 | 0.9719 | 0.9538 | 0.8974 | 0.9521 | 0.0193 |
| LOC646377  | 0.8626 | 1.1196 | 0.9274 | 0.8988 | 0.9521 | 0.0574 |
| C13orf30   | 0.9102 | 0.9723 | 1.0044 | 0.9215 | 0.9521 | 0.0221 |
| DKK3       | 0.9180 | 1.0329 | 0.9810 | 0.8766 | 0.9521 | 0.0344 |
| THRA       | 0.8318 | 1.1163 | 0.9821 | 0.8783 | 0.9521 | 0.0631 |
| CSNK1A1P   | 0.9106 | 0.9727 | 1.0279 | 0.8973 | 0.9521 | 0.0301 |
| LOC1001327 | 0.9040 | 1.0173 | 1.0080 | 0.8792 | 0.9521 | 0.0354 |
| LOC1001337 | 0.9941 | 1.0613 | 1.0028 | 0.7504 | 0.9521 | 0.0689 |
| VTCN1      | 0.9085 | 1.0515 | 0.9168 | 0.9318 | 0.9521 | 0.0335 |
| LOC1001300 | 0.9399 | 1.0761 | 0.8894 | 0.9031 | 0.9522 | 0.0427 |
| METTL2B    | 0.8433 | 1.0726 | 0.9757 | 0.9171 | 0.9522 | 0.0484 |
| RIN3       | 0.9042 | 1.0104 | 0.9577 | 0.9365 | 0.9522 | 0.0223 |
| C20orf94   | 0.7893 | 1.0993 | 1.1114 | 0.8087 | 0.9522 | 0.0886 |
| MIER3      | 0.7458 | 1.1901 | 0.9964 | 0.8765 | 0.9522 | 0.0944 |
| NT5E       | 1.0053 | 0.9234 | 0.9388 | 0.9413 | 0.9522 | 0.0181 |
| AMZ2       | 0.7519 | 1.3739 | 0.9697 | 0.7133 | 0.9522 | 0.1515 |
| LY6H       | 0.8720 | 1.1013 | 0.9512 | 0.8845 | 0.9522 | 0.0526 |
| TTY5       | 0.8975 | 1.0544 | 0.9067 | 0.9502 | 0.9522 | 0.0360 |
| H3F3A      | 0.8519 | 1.2860 | 0.9910 | 0.6799 | 0.9522 | 0.1282 |
| ZNF710     | 0.9122 | 1.0198 | 0.9758 | 0.9010 | 0.9522 | 0.0279 |
| SHF        | 0.8784 | 1.0978 | 0.9713 | 0.8613 | 0.9522 | 0.0542 |
| UNQ1940    | 0.9653 | 1.0930 | 0.8894 | 0.8613 | 0.9522 | 0.0518 |
| C6orf130   | 0.8680 | 1.3616 | 0.8278 | 0.7515 | 0.9522 | 0.1386 |
| LOC644744  | 0.9314 | 1.0494 | 0.8849 | 0.9433 | 0.9522 | 0.0347 |
| LOC440031  | 0.9702 | 1.0826 | 0.9480 | 0.8081 | 0.9522 | 0.0564 |
| ANKRD30B   | 0.7657 | 1.3425 | 0.9937 | 0.7071 | 0.9522 | 0.1440 |
| SNORD45B   | 0.9402 | 0.9793 | 0.9652 | 0.9244 | 0.9522 | 0.0123 |
| PDE2A      | 0.9685 | 0.9651 | 1.0160 | 0.8594 | 0.9523 | 0.0331 |
| CCNT2      | 0.7773 | 1.2052 | 0.9752 | 0.8514 | 0.9523 | 0.0937 |
| C2orf19    | 0.8900 | 0.9680 | 1.1084 | 0.8427 | 0.9523 | 0.0581 |
| LOC286411  | 0.9118 | 1.0674 | 0.9810 | 0.8489 | 0.9523 | 0.0469 |
| LOC651894  | 0.7568 | 1.1768 | 1.1068 | 0.7687 | 0.9523 | 0.1104 |
| KIF17      | 0.9313 | 1.0512 | 0.9562 | 0.8705 | 0.9523 | 0.0376 |
| UPK3B      | 0.8906 | 1.0640 | 0.9765 | 0.8780 | 0.9523 | 0.0432 |
| KLHL11     | 0.8033 | 1.0337 | 1.0429 | 0.9293 | 0.9523 | 0.0559 |
| LOC653816  | 0.9288 | 0.9993 | 1.0005 | 0.8806 | 0.9523 | 0.0292 |
| ZNF174     | 0.9456 | 1.1409 | 0.9728 | 0.7499 | 0.9523 | 0.0801 |
| PDDC1      | 0.9001 | 1.1491 | 0.9346 | 0.8253 | 0.9523 | 0.0695 |
| LOC651919  | 0.8290 | 0.9937 | 1.0338 | 0.9527 | 0.9523 | 0.0443 |

|            |        |        |        |        |        |        |
|------------|--------|--------|--------|--------|--------|--------|
| TAS2R41    | 1.0032 | 0.9217 | 1.0493 | 0.8350 | 0.9523 | 0.0472 |
| MIR548J    | 0.9668 | 0.9784 | 0.9797 | 0.8844 | 0.9523 | 0.0228 |
| ME3        | 0.8967 | 1.0295 | 1.0175 | 0.8656 | 0.9523 | 0.0416 |
| MSL3L2     | 0.8382 | 0.9847 | 1.0311 | 0.9553 | 0.9523 | 0.0411 |
| LOC644075  | 0.8891 | 1.0443 | 1.0723 | 0.8035 | 0.9523 | 0.0639 |
| ODC1       | 0.7933 | 1.4237 | 0.9253 | 0.6670 | 0.9523 | 0.1657 |
| C22orf37   | 0.9470 | 1.0498 | 0.9557 | 0.8569 | 0.9523 | 0.0394 |
| MESDC2     | 0.9122 | 1.0892 | 0.9529 | 0.8550 | 0.9523 | 0.0498 |
| LOC1001311 | 0.7919 | 1.2669 | 0.9966 | 0.7539 | 0.9523 | 0.1176 |
| LOC652737  | 0.9534 | 0.9918 | 1.0035 | 0.8607 | 0.9523 | 0.0324 |
| C6orf123   | 0.9308 | 0.9988 | 0.9935 | 0.8862 | 0.9523 | 0.0269 |
| CDS1       | 0.7215 | 1.2908 | 1.0982 | 0.6989 | 0.9523 | 0.1453 |
| LOC1001286 | 0.9619 | 0.9692 | 0.9814 | 0.8969 | 0.9524 | 0.0189 |
| LOC1001340 | 0.9328 | 1.0427 | 0.9560 | 0.8780 | 0.9524 | 0.0343 |
| SNORD113-3 | 0.8599 | 1.0670 | 1.0234 | 0.8592 | 0.9524 | 0.0543 |
| LOC643626  | 0.9382 | 0.9448 | 0.9700 | 0.9565 | 0.9524 | 0.0070 |
| AFAR3      | 0.9508 | 0.9648 | 1.0087 | 0.8853 | 0.9524 | 0.0255 |
| LOC729157  | 0.8351 | 1.2005 | 0.9208 | 0.8531 | 0.9524 | 0.0847 |
| SOX18      | 0.8858 | 1.0958 | 1.0008 | 0.8272 | 0.9524 | 0.0599 |
| LOC644925  | 0.8234 | 1.1397 | 0.9716 | 0.8749 | 0.9524 | 0.0696 |
| LOC1001335 | 0.8574 | 1.0508 | 1.0558 | 0.8456 | 0.9524 | 0.0583 |
| MYLK       | 0.9316 | 1.0604 | 0.9457 | 0.8719 | 0.9524 | 0.0394 |
| CD4        | 0.9563 | 1.0306 | 0.9093 | 0.9133 | 0.9524 | 0.0282 |
| GCC2       | 0.8329 | 1.0837 | 1.0347 | 0.8583 | 0.9524 | 0.0627 |
| LOC650620  | 0.9117 | 1.1194 | 0.9505 | 0.8282 | 0.9524 | 0.0612 |
| LOC652876  | 0.9778 | 1.1008 | 0.8867 | 0.8443 | 0.9524 | 0.0568 |
| OR4F3      | 0.9581 | 0.9869 | 0.9762 | 0.8885 | 0.9524 | 0.0221 |
| LOC642460  | 0.9496 | 0.9464 | 0.9964 | 0.9174 | 0.9524 | 0.0163 |
| LOC729020  | 0.9275 | 1.0262 | 0.9778 | 0.8782 | 0.9524 | 0.0319 |
| ADCY7      | 0.7759 | 1.2868 | 0.9244 | 0.8226 | 0.9524 | 0.1157 |
| TSPY1      | 0.9183 | 1.0625 | 0.9331 | 0.8959 | 0.9524 | 0.0375 |
| PRDM2      | 0.9073 | 1.0161 | 1.0350 | 0.8514 | 0.9524 | 0.0439 |
| AIFM1      | 0.8766 | 1.3399 | 0.9491 | 0.6441 | 0.9524 | 0.1446 |
| LOC91461   | 0.9139 | 0.9203 | 0.9646 | 1.0110 | 0.9525 | 0.0225 |
| LOC644963  | 0.9536 | 0.9763 | 0.9968 | 0.8832 | 0.9525 | 0.0247 |
| C1orf55    | 0.8238 | 1.2983 | 0.9805 | 0.7072 | 0.9525 | 0.1282 |
| KRTAP12-3  | 0.8710 | 1.0571 | 1.0138 | 0.8679 | 0.9525 | 0.0487 |
| TRIM3      | 0.9163 | 1.0415 | 0.9712 | 0.8809 | 0.9525 | 0.0350 |
| KRT18P19   | 0.9548 | 0.9504 | 0.9681 | 0.9365 | 0.9525 | 0.0065 |
| LOC441996  | 0.8725 | 1.1447 | 0.9619 | 0.8308 | 0.9525 | 0.0697 |
| LOC1001279 | 0.9202 | 0.9944 | 1.0277 | 0.8677 | 0.9525 | 0.0361 |
| ADAM18     | 0.9217 | 1.0583 | 0.9768 | 0.8532 | 0.9525 | 0.0434 |
| ACOX1      | 0.8498 | 1.2060 | 0.9899 | 0.7644 | 0.9525 | 0.0964 |
| DNCL1      | 0.7453 | 1.1876 | 1.0978 | 0.7793 | 0.9525 | 0.1115 |
| LOC645812  | 0.7966 | 1.1196 | 0.9946 | 0.8991 | 0.9525 | 0.0688 |
| LOC647704  | 0.9592 | 1.0722 | 0.9558 | 0.8229 | 0.9525 | 0.0510 |

|            |        |        |        |        |        |        |
|------------|--------|--------|--------|--------|--------|--------|
| LOC646731  | 0.9586 | 0.9853 | 1.0877 | 0.7785 | 0.9525 | 0.0643 |
| C14orf125  | 0.7857 | 1.0602 | 1.0284 | 0.9359 | 0.9525 | 0.0615 |
| SPATA4     | 0.7905 | 1.1787 | 0.9852 | 0.8558 | 0.9525 | 0.0855 |
| LOC1001335 | 0.8773 | 1.0160 | 1.0046 | 0.9122 | 0.9525 | 0.0342 |
| LOC642161  | 0.8197 | 0.9877 | 1.0608 | 0.9420 | 0.9525 | 0.0506 |
| RPS19BP1   | 0.8234 | 1.3186 | 0.9415 | 0.7268 | 0.9526 | 0.1297 |
| HSPA6      | 0.9797 | 1.0747 | 0.9704 | 0.7855 | 0.9526 | 0.0605 |
| LOC730159  | 0.9633 | 1.0730 | 0.9017 | 0.8723 | 0.9526 | 0.0444 |
| BAGE3      | 0.9258 | 1.0110 | 0.9895 | 0.8840 | 0.9526 | 0.0292 |
| LOC1001307 | 0.9004 | 0.9974 | 1.0017 | 0.9107 | 0.9526 | 0.0272 |
| LOC440059  | 0.8864 | 1.0667 | 0.9475 | 0.9097 | 0.9526 | 0.0401 |
| LOC643563  | 0.8837 | 1.0742 | 1.0092 | 0.8432 | 0.9526 | 0.0538 |
| LOC651868  | 0.9250 | 1.0053 | 0.9760 | 0.9040 | 0.9526 | 0.0232 |
| EYA4       | 0.9041 | 1.0003 | 1.0369 | 0.8691 | 0.9526 | 0.0395 |
| LOC643699  | 0.8982 | 1.1609 | 0.8786 | 0.8728 | 0.9526 | 0.0696 |
| LOC647707  | 0.8935 | 1.0647 | 1.0331 | 0.8191 | 0.9526 | 0.0580 |
| FAM22B     | 0.8956 | 1.0286 | 1.0252 | 0.8611 | 0.9526 | 0.0435 |
| LOC1001286 | 0.9592 | 1.0104 | 0.9156 | 0.9252 | 0.9526 | 0.0214 |
| LOC645882  | 0.8805 | 1.1347 | 0.9634 | 0.8318 | 0.9526 | 0.0665 |
| UBE4A      | 0.7344 | 1.1761 | 1.1708 | 0.7291 | 0.9526 | 0.1275 |
| MOBK1B     | 0.8505 | 1.2101 | 1.0307 | 0.7193 | 0.9526 | 0.1069 |
| LOC641977  | 0.8524 | 0.9433 | 1.0370 | 0.9778 | 0.9526 | 0.0386 |
| LOC649593  | 0.9196 | 0.9862 | 1.0048 | 0.9000 | 0.9526 | 0.0253 |
| LOC642563  | 0.8347 | 1.1161 | 0.9689 | 0.8910 | 0.9527 | 0.0610 |
| PRAMEF8    | 0.9005 | 1.1033 | 0.9835 | 0.8233 | 0.9527 | 0.0599 |
| LOC1001011 | 0.8530 | 1.1211 | 0.9765 | 0.8600 | 0.9527 | 0.0629 |
| TRIML2     | 0.9358 | 0.9672 | 1.0047 | 0.9030 | 0.9527 | 0.0218 |
| LOC645339  | 0.9071 | 1.0640 | 0.9684 | 0.8712 | 0.9527 | 0.0422 |
| PPP1R1A    | 0.8193 | 1.0795 | 1.0028 | 0.9091 | 0.9527 | 0.0565 |
| CYP3A43    | 0.9253 | 0.9512 | 1.0217 | 0.9125 | 0.9527 | 0.0244 |
| DERPC      | 0.8350 | 1.2844 | 0.9467 | 0.7447 | 0.9527 | 0.1180 |
| OR9K2      | 0.9654 | 0.9884 | 0.9631 | 0.8939 | 0.9527 | 0.0204 |
| GRB7       | 0.9179 | 1.0798 | 0.9521 | 0.8611 | 0.9527 | 0.0463 |
| P704P      | 0.9455 | 0.9357 | 1.0138 | 0.9158 | 0.9527 | 0.0213 |
| MMP9       | 0.8717 | 1.0126 | 1.0430 | 0.8835 | 0.9527 | 0.0439 |
| ZNF619     | 0.8315 | 0.9887 | 1.0380 | 0.9525 | 0.9527 | 0.0440 |
| LOC644819  | 0.8952 | 1.0330 | 0.9514 | 0.9312 | 0.9527 | 0.0292 |
| LOC1001321 | 0.8560 | 1.0708 | 1.0164 | 0.8677 | 0.9527 | 0.0537 |
| LTA4H      | 0.7799 | 1.4073 | 0.9466 | 0.6770 | 0.9527 | 0.1614 |
| FLJ10213   | 0.9793 | 1.1003 | 0.9072 | 0.8240 | 0.9527 | 0.0585 |
| ANKRD34A   | 0.7732 | 0.9372 | 1.2823 | 0.8181 | 0.9527 | 0.1152 |
| GPR133     | 0.8503 | 0.9797 | 1.0728 | 0.9081 | 0.9527 | 0.0480 |
| CDX2       | 0.8613 | 1.1237 | 0.8886 | 0.9374 | 0.9527 | 0.0591 |
| LOC647591  | 0.9509 | 1.0023 | 1.0033 | 0.8544 | 0.9527 | 0.0350 |
| FLJ40288   | 0.8141 | 1.0423 | 1.0440 | 0.9106 | 0.9527 | 0.0558 |
| DOT1L      | 0.9422 | 1.1334 | 0.9834 | 0.7519 | 0.9527 | 0.0785 |

|            |        |        |        |        |        |        |
|------------|--------|--------|--------|--------|--------|--------|
| SNORD38B   | 0.8519 | 1.0378 | 1.0630 | 0.8582 | 0.9527 | 0.0566 |
| MIR1277    | 0.8865 | 1.0454 | 1.0142 | 0.8649 | 0.9527 | 0.0452 |
| LOC648470  | 0.9568 | 1.0747 | 0.9793 | 0.8002 | 0.9527 | 0.0569 |
| C9orf102   | 0.9450 | 1.1466 | 0.9540 | 0.7654 | 0.9527 | 0.0778 |
| LOC1001303 | 0.9358 | 0.8962 | 1.0192 | 0.9599 | 0.9528 | 0.0258 |
| OR2A14     | 0.8844 | 1.0477 | 1.0475 | 0.8315 | 0.9528 | 0.0558 |
| ZNF268     | 0.8997 | 1.1019 | 0.9711 | 0.8383 | 0.9528 | 0.0566 |
| LOC1001323 | 0.9190 | 1.1339 | 0.9124 | 0.8458 | 0.9528 | 0.0626 |
| KIF21B     | 0.9852 | 1.0403 | 0.9512 | 0.8343 | 0.9528 | 0.0435 |
| LOC1001320 | 0.9674 | 0.9273 | 0.9960 | 0.9205 | 0.9528 | 0.0177 |
| LOC402100  | 0.9809 | 0.9720 | 0.9477 | 0.9106 | 0.9528 | 0.0157 |
| MDM2       | 0.8170 | 1.1010 | 1.0056 | 0.8876 | 0.9528 | 0.0629 |
| LOC643951  | 0.9922 | 0.9464 | 0.9755 | 0.8970 | 0.9528 | 0.0209 |
| RANBP9     | 0.8393 | 1.0865 | 0.9895 | 0.8958 | 0.9528 | 0.0543 |
| NOTUM      | 0.9532 | 1.0849 | 0.8764 | 0.8967 | 0.9528 | 0.0469 |
| LRAT       | 1.0249 | 0.9626 | 0.9947 | 0.8289 | 0.9528 | 0.0432 |
| LOC653937  | 0.8206 | 1.1268 | 0.9715 | 0.8922 | 0.9528 | 0.0657 |
| LOC150383  | 0.8442 | 1.0973 | 0.9737 | 0.8961 | 0.9528 | 0.0550 |
| LOC646123  | 0.8569 | 1.0106 | 1.0684 | 0.8753 | 0.9528 | 0.0516 |
| PTPN7      | 0.9210 | 0.9803 | 1.0386 | 0.8712 | 0.9528 | 0.0363 |
| LOC647778  | 0.8860 | 1.2015 | 0.8939 | 0.8299 | 0.9528 | 0.0841 |
| FGF21      | 0.8708 | 1.1326 | 1.0373 | 0.7706 | 0.9528 | 0.0813 |
| OR51V1     | 1.0320 | 0.9527 | 0.9195 | 0.9072 | 0.9528 | 0.0281 |
| LOC730036  | 0.8999 | 1.0235 | 0.9626 | 0.9253 | 0.9528 | 0.0269 |
| FLJ37201   | 0.8641 | 1.1041 | 0.9697 | 0.8734 | 0.9528 | 0.0558 |
| FOLH1B     | 0.9450 | 1.0678 | 0.9416 | 0.8569 | 0.9528 | 0.0434 |
| LOC1001294 | 0.8985 | 1.0303 | 1.0112 | 0.8713 | 0.9528 | 0.0398 |
| LOC391282  | 0.9620 | 1.0104 | 1.0131 | 0.8258 | 0.9528 | 0.0439 |
| FYB        | 0.8671 | 1.0545 | 0.9623 | 0.9275 | 0.9528 | 0.0392 |
| LOC1001284 | 0.9119 | 1.0628 | 1.0136 | 0.8232 | 0.9529 | 0.0534 |
| LOC651991  | 0.7784 | 1.1171 | 0.9925 | 0.9234 | 0.9529 | 0.0706 |
| LOC646835  | 0.8944 | 1.0707 | 0.9062 | 0.9401 | 0.9529 | 0.0405 |
| KRT10      | 0.9834 | 1.2761 | 0.8889 | 0.6630 | 0.9529 | 0.1270 |
| RNF32      | 0.8763 | 1.0422 | 1.0097 | 0.8833 | 0.9529 | 0.0427 |
| LOC651520  | 0.9518 | 0.9806 | 1.0011 | 0.8780 | 0.9529 | 0.0269 |
| ANK1       | 0.8791 | 1.0706 | 0.9834 | 0.8784 | 0.9529 | 0.0464 |
| LIG3       | 0.8713 | 1.2192 | 0.8617 | 0.8593 | 0.9529 | 0.0888 |
| WBP4       | 0.7582 | 1.2348 | 0.9417 | 0.8768 | 0.9529 | 0.1014 |
| LOC1001291 | 0.9248 | 1.0384 | 0.9943 | 0.8541 | 0.9529 | 0.0404 |
| RTN4RL1    | 1.0458 | 1.0168 | 0.9059 | 0.8431 | 0.9529 | 0.0474 |
| GABPB2     | 0.7909 | 1.3695 | 0.8832 | 0.7679 | 0.9529 | 0.1411 |
| SIGLEC8    | 0.8885 | 1.1145 | 0.9262 | 0.8823 | 0.9529 | 0.0547 |
| FLJ40296   | 0.9574 | 1.0072 | 0.9784 | 0.8687 | 0.9529 | 0.0299 |
| LOC126536  | 1.0166 | 1.0217 | 0.8747 | 0.8987 | 0.9529 | 0.0386 |
| LOC730419  | 0.9536 | 0.9803 | 1.0227 | 0.8550 | 0.9529 | 0.0356 |
| LOC644628  | 0.9316 | 0.9397 | 0.9805 | 0.9598 | 0.9529 | 0.0110 |

|            |        |        |        |        |        |        |
|------------|--------|--------|--------|--------|--------|--------|
| MPST       | 0.8683 | 1.3099 | 0.8864 | 0.7471 | 0.9529 | 0.1229 |
| F13A1      | 0.8791 | 1.0402 | 0.9902 | 0.9022 | 0.9529 | 0.0377 |
| FAM181B    | 0.9558 | 1.0376 | 0.9201 | 0.8982 | 0.9529 | 0.0306 |
| CIDCEP     | 0.9699 | 0.9953 | 0.9801 | 0.8663 | 0.9529 | 0.0293 |
| LOC727735  | 0.8602 | 1.0577 | 0.9900 | 0.9039 | 0.9529 | 0.0441 |
| ZNF488     | 0.8787 | 1.0934 | 0.9295 | 0.9102 | 0.9529 | 0.0480 |
| ACSM4      | 0.8826 | 1.0745 | 0.9776 | 0.8770 | 0.9529 | 0.0466 |
| LOC649397  | 0.9298 | 1.1185 | 0.8850 | 0.8784 | 0.9529 | 0.0564 |
| LOC1001314 | 0.8024 | 1.0726 | 0.9996 | 0.9372 | 0.9529 | 0.0573 |
| LOC1001305 | 0.6914 | 1.2186 | 1.0367 | 0.8651 | 0.9530 | 0.1132 |
| PAX1       | 0.9542 | 1.1102 | 0.8549 | 0.8926 | 0.9530 | 0.0563 |
| LOC651213  | 0.9264 | 1.0866 | 0.9398 | 0.8591 | 0.9530 | 0.0479 |
| FAM78B     | 0.8637 | 1.0223 | 1.0368 | 0.8890 | 0.9530 | 0.0446 |
| LOC641772  | 0.9115 | 1.0458 | 0.9913 | 0.8633 | 0.9530 | 0.0407 |
| CEP250     | 0.9051 | 1.1070 | 0.9619 | 0.8379 | 0.9530 | 0.0572 |
| BET3L      | 1.0234 | 1.0404 | 0.9079 | 0.8403 | 0.9530 | 0.0477 |
| LOX        | 0.9522 | 1.0694 | 0.8804 | 0.9100 | 0.9530 | 0.0415 |
| LOC730099  | 0.8598 | 1.1588 | 0.9202 | 0.8733 | 0.9530 | 0.0698 |
| C17orf65   | 0.8930 | 1.0675 | 1.0183 | 0.8332 | 0.9530 | 0.0543 |
| MYO3B      | 0.8201 | 0.9957 | 1.1787 | 0.8175 | 0.9530 | 0.0860 |
| LOC648044  | 0.8950 | 1.0360 | 1.0372 | 0.8437 | 0.9530 | 0.0494 |
| TREML4     | 0.9355 | 0.9716 | 0.9699 | 0.9351 | 0.9530 | 0.0102 |
| LOC651289  | 0.9497 | 0.9636 | 1.0273 | 0.8715 | 0.9530 | 0.0320 |
| LOC1001330 | 0.9069 | 1.0312 | 1.0354 | 0.8387 | 0.9530 | 0.0484 |
| LOC645804  | 0.8699 | 0.9970 | 1.0446 | 0.9005 | 0.9530 | 0.0408 |
| LOC642864  | 0.8702 | 1.0667 | 1.0606 | 0.8146 | 0.9530 | 0.0649 |
| CEACAM4    | 1.0032 | 1.0534 | 0.9833 | 0.7722 | 0.9530 | 0.0621 |
| LOC391209  | 0.9481 | 1.0123 | 0.9592 | 0.8925 | 0.9530 | 0.0246 |
| PAPOLG     | 0.8963 | 1.0060 | 1.0310 | 0.8789 | 0.9530 | 0.0383 |
| AP1S3      | 0.8646 | 1.0987 | 0.9710 | 0.8778 | 0.9530 | 0.0540 |
| SSX1       | 0.9490 | 1.0585 | 0.9055 | 0.8991 | 0.9530 | 0.0369 |
| MYCT1      | 0.9278 | 0.9842 | 1.0314 | 0.8687 | 0.9530 | 0.0352 |
| MGC33948   | 0.7471 | 1.1522 | 0.9889 | 0.9240 | 0.9530 | 0.0838 |
| UNCX       | 0.9289 | 1.0841 | 0.9224 | 0.8768 | 0.9530 | 0.0452 |
| SNORD87    | 1.0146 | 0.9501 | 0.9014 | 0.9461 | 0.9530 | 0.0233 |
| LOC730029  | 0.8999 | 1.2453 | 1.0304 | 0.6367 | 0.9531 | 0.1272 |
| AGBL1      | 0.9404 | 0.9674 | 0.9570 | 0.9474 | 0.9531 | 0.0059 |
| LOC388820  | 0.9728 | 1.0291 | 0.9306 | 0.8798 | 0.9531 | 0.0317 |
| LOC149950  | 0.8997 | 1.1337 | 0.8852 | 0.8936 | 0.9531 | 0.0603 |
| ZNF675     | 0.9002 | 1.0466 | 1.0088 | 0.8566 | 0.9531 | 0.0447 |
| MEOX1      | 0.8711 | 1.1414 | 0.9244 | 0.8755 | 0.9531 | 0.0639 |
| CCDC114    | 0.9899 | 0.9193 | 0.9720 | 0.9312 | 0.9531 | 0.0167 |
| CGB2       | 0.8369 | 1.0670 | 0.9565 | 0.9520 | 0.9531 | 0.0470 |
| LOC647104  | 0.8372 | 1.1867 | 0.9864 | 0.8022 | 0.9531 | 0.0875 |
| HIST1H3A   | 0.8885 | 1.0960 | 0.9188 | 0.9092 | 0.9531 | 0.0480 |
| FAM110C    | 0.8616 | 1.0322 | 0.9672 | 0.9515 | 0.9531 | 0.0351 |



|            |        |        |        |        |        |        |
|------------|--------|--------|--------|--------|--------|--------|
| FRRS1      | 1.0033 | 1.1902 | 0.9398 | 0.6791 | 0.9531 | 0.1057 |
| ALS2CR11   | 0.9737 | 1.0413 | 0.9016 | 0.8958 | 0.9531 | 0.0343 |
| LOC653570  | 0.9439 | 1.0001 | 0.9999 | 0.8685 | 0.9531 | 0.0312 |
| SLC27A3    | 0.8702 | 1.2781 | 0.8182 | 0.8460 | 0.9531 | 0.1088 |
| RICTOR     | 0.9133 | 1.1434 | 0.9325 | 0.8234 | 0.9531 | 0.0677 |
| SLC45A2    | 0.8579 | 1.0180 | 1.0174 | 0.9192 | 0.9531 | 0.0393 |
| C1orf81    | 0.7457 | 1.0838 | 1.0152 | 0.9677 | 0.9531 | 0.0731 |
| LOC338829  | 0.9369 | 1.0222 | 1.0197 | 0.8338 | 0.9531 | 0.0445 |
| ELA2A      | 0.9360 | 1.0429 | 0.9314 | 0.9023 | 0.9532 | 0.0308 |
| SNORD58B   | 0.8859 | 0.9133 | 1.0127 | 1.0007 | 0.9532 | 0.0315 |
| LOC1001305 | 0.7897 | 1.1368 | 0.9742 | 0.9120 | 0.9532 | 0.0722 |
| TRIM9      | 0.7955 | 1.1817 | 0.9768 | 0.8586 | 0.9532 | 0.0850 |
| LOC652768  | 0.8986 | 1.0357 | 1.0585 | 0.8199 | 0.9532 | 0.0568 |
| LOC1001307 | 0.9066 | 1.0033 | 1.0129 | 0.8900 | 0.9532 | 0.0319 |
| LOC647060  | 0.9559 | 1.0830 | 0.8779 | 0.8960 | 0.9532 | 0.0464 |
| TREH       | 0.9319 | 0.9527 | 0.9644 | 0.9638 | 0.9532 | 0.0076 |
| OLFML1     | 0.9625 | 1.0439 | 0.8403 | 0.9661 | 0.9532 | 0.0421 |
| LOC730050  | 0.8761 | 1.1329 | 0.9737 | 0.8301 | 0.9532 | 0.0670 |
| BMF        | 0.9879 | 1.0367 | 0.8442 | 0.9440 | 0.9532 | 0.0410 |
| LOC442113  | 0.9029 | 1.0353 | 0.9421 | 0.9326 | 0.9532 | 0.0286 |
| LOC643089  | 0.9886 | 0.9103 | 0.9814 | 0.9325 | 0.9532 | 0.0190 |
| LRRC52     | 0.9149 | 1.1074 | 0.9962 | 0.7943 | 0.9532 | 0.0660 |
| CYP2C19    | 0.9412 | 1.0913 | 1.0234 | 0.7570 | 0.9532 | 0.0722 |
| NHEDC1     | 0.8802 | 1.0327 | 1.0083 | 0.8916 | 0.9532 | 0.0392 |
| LOC1001309 | 0.8313 | 1.0613 | 0.9685 | 0.9517 | 0.9532 | 0.0472 |
| ATP2B2     | 0.9174 | 0.9911 | 1.0282 | 0.8763 | 0.9532 | 0.0345 |
| RPL34      | 0.7955 | 1.3577 | 0.9715 | 0.6883 | 0.9532 | 0.1469 |
| LOC653411  | 0.9058 | 1.0660 | 1.0113 | 0.8299 | 0.9533 | 0.0529 |
| LOC650553  | 0.9277 | 1.0137 | 1.0256 | 0.8460 | 0.9533 | 0.0419 |
| C1orf188   | 0.9320 | 1.0567 | 0.9219 | 0.9025 | 0.9533 | 0.0350 |
| LOC653907  | 0.7973 | 1.0482 | 1.0334 | 0.9341 | 0.9533 | 0.0578 |
| HPSE2      | 0.9565 | 1.0623 | 0.9937 | 0.8005 | 0.9533 | 0.0554 |
| SCARA5     | 0.8913 | 1.0886 | 0.9664 | 0.8668 | 0.9533 | 0.0498 |
| RGPD4      | 0.9523 | 0.9720 | 0.9857 | 0.9031 | 0.9533 | 0.0181 |
| PKD2L2     | 0.9301 | 1.0392 | 0.9551 | 0.8887 | 0.9533 | 0.0317 |
| LOC652802  | 0.8531 | 1.0755 | 0.9979 | 0.8867 | 0.9533 | 0.0511 |
| NCKAP1L    | 0.9576 | 1.0032 | 1.0055 | 0.8468 | 0.9533 | 0.0372 |
| TAS2R49    | 0.9217 | 0.9417 | 1.1248 | 0.8248 | 0.9533 | 0.0626 |
| ZNF660     | 0.8622 | 0.9916 | 0.9514 | 1.0079 | 0.9533 | 0.0326 |
| SERAC1     | 0.8587 | 1.0050 | 1.0320 | 0.9174 | 0.9533 | 0.0399 |
| CASKIN1    | 0.9043 | 0.9679 | 0.9851 | 0.9558 | 0.9533 | 0.0174 |
| LOC391722  | 0.8994 | 1.0334 | 0.9948 | 0.8855 | 0.9533 | 0.0361 |
| GNAT1      | 0.8809 | 1.0679 | 0.9581 | 0.9063 | 0.9533 | 0.0414 |
| LOC647435  | 1.0139 | 0.8845 | 1.0049 | 0.9100 | 0.9533 | 0.0328 |
| LOC728849  | 0.8400 | 1.0320 | 1.0104 | 0.9308 | 0.9533 | 0.0436 |
| EYS        | 0.8321 | 1.0425 | 1.0932 | 0.8454 | 0.9533 | 0.0670 |

|            |        |        |        |        |        |        |
|------------|--------|--------|--------|--------|--------|--------|
| TCF21      | 0.9298 | 1.0547 | 0.9732 | 0.8555 | 0.9533 | 0.0416 |
| LOC389813  | 0.9254 | 1.0147 | 1.0572 | 0.8159 | 0.9533 | 0.0534 |
| TET2       | 0.9351 | 0.9716 | 1.0082 | 0.8983 | 0.9533 | 0.0236 |
| SLC43A3    | 0.9125 | 1.0127 | 1.0338 | 0.8543 | 0.9533 | 0.0423 |
| CTSE       | 0.8970 | 0.9693 | 0.9911 | 0.9558 | 0.9533 | 0.0201 |
| LOC642895  | 0.9324 | 0.9627 | 1.0087 | 0.9094 | 0.9533 | 0.0214 |
| C1orf100   | 0.9149 | 1.0823 | 0.9483 | 0.8678 | 0.9533 | 0.0461 |
| MIR125A    | 0.9286 | 1.1217 | 0.9387 | 0.8243 | 0.9533 | 0.0618 |
| LOC729506  | 0.9572 | 0.9764 | 0.9668 | 0.9128 | 0.9533 | 0.0140 |
| LOC1001318 | 0.9594 | 1.0967 | 0.8500 | 0.9073 | 0.9533 | 0.0528 |
| LOC654088  | 0.9014 | 1.0571 | 0.9721 | 0.8827 | 0.9533 | 0.0396 |
| CT47A6     | 0.9205 | 1.0161 | 0.9845 | 0.8922 | 0.9533 | 0.0285 |
| HIST1H2AI  | 0.8022 | 1.1770 | 1.1388 | 0.6953 | 0.9533 | 0.1204 |
| TRIM75     | 0.8281 | 0.9755 | 1.0079 | 1.0019 | 0.9533 | 0.0423 |
| QSER1      | 0.9131 | 1.0016 | 0.9956 | 0.9030 | 0.9533 | 0.0262 |
| C17orf87   | 0.8737 | 1.1558 | 0.9240 | 0.8600 | 0.9534 | 0.0689 |
| PALM       | 0.9502 | 1.1583 | 0.9162 | 0.7887 | 0.9534 | 0.0766 |
| AGTR1      | 0.8723 | 1.0535 | 0.9852 | 0.9025 | 0.9534 | 0.0410 |
| TRAF5      | 0.8963 | 1.0454 | 0.9710 | 0.9007 | 0.9534 | 0.0351 |
| ASPA       | 0.8743 | 1.0090 | 0.9352 | 0.9950 | 0.9534 | 0.0308 |
| LOC440366  | 0.9026 | 1.1066 | 0.9365 | 0.8679 | 0.9534 | 0.0529 |
| KIAA1324   | 0.9594 | 1.0013 | 0.9053 | 0.9475 | 0.9534 | 0.0198 |
| LOC646008  | 0.9011 | 0.9286 | 1.1279 | 0.8560 | 0.9534 | 0.0601 |
| LOC646374  | 0.9999 | 1.0966 | 0.8378 | 0.8793 | 0.9534 | 0.0588 |
| LOC652771  | 0.8456 | 1.0901 | 0.9752 | 0.9028 | 0.9534 | 0.0527 |
| LOC652126  | 0.8749 | 1.0658 | 0.9850 | 0.8880 | 0.9534 | 0.0448 |
| RAB1A      | 0.6612 | 1.4607 | 0.9574 | 0.7344 | 0.9534 | 0.1805 |
| MS4A1      | 0.9086 | 1.0461 | 0.9178 | 0.9413 | 0.9534 | 0.0316 |
| LOC651353  | 0.8635 | 1.0616 | 1.0504 | 0.8382 | 0.9534 | 0.0595 |
| CCBL2      | 0.8105 | 1.1867 | 1.0937 | 0.7229 | 0.9534 | 0.1109 |
| TRAPPC9    | 0.9489 | 1.0766 | 0.9470 | 0.8412 | 0.9534 | 0.0482 |
| LOC1001323 | 0.9823 | 0.9819 | 0.9178 | 0.9318 | 0.9534 | 0.0168 |
| CD151      | 0.8517 | 1.2183 | 0.9839 | 0.7599 | 0.9534 | 0.0995 |
| FLJ32310   | 0.8438 | 1.0536 | 1.0317 | 0.8846 | 0.9534 | 0.0524 |
| JRKL       | 0.8865 | 1.0444 | 0.9779 | 0.9051 | 0.9535 | 0.0362 |
| LOC1001301 | 0.9135 | 0.9808 | 0.9777 | 0.9419 | 0.9535 | 0.0160 |
| ZNF688     | 0.8305 | 1.2058 | 0.9633 | 0.8142 | 0.9535 | 0.0905 |
| LOC650410  | 0.9518 | 1.1305 | 0.8272 | 0.9043 | 0.9535 | 0.0643 |
| DCD        | 0.9437 | 1.0273 | 0.9357 | 0.9071 | 0.9535 | 0.0258 |
| C1orf157   | 0.9205 | 1.1276 | 0.9953 | 0.7705 | 0.9535 | 0.0745 |
| ASB14      | 0.8158 | 0.9947 | 1.0816 | 0.9217 | 0.9535 | 0.0563 |
| EPS8L2     | 0.8820 | 1.0554 | 0.9894 | 0.8871 | 0.9535 | 0.0420 |
| IL6ST      | 0.8280 | 1.0690 | 1.0267 | 0.8902 | 0.9535 | 0.0566 |
| INTS6      | 0.8648 | 1.1905 | 0.9700 | 0.7887 | 0.9535 | 0.0873 |
| UBE2NL     | 0.9345 | 1.0978 | 0.9006 | 0.8811 | 0.9535 | 0.0493 |
| LOC646996  | 0.6721 | 1.3714 | 1.0252 | 0.7453 | 0.9535 | 0.1587 |

|            |        |        |        |        |        |        |
|------------|--------|--------|--------|--------|--------|--------|
| IL9R       | 0.9447 | 1.0100 | 0.9985 | 0.8608 | 0.9535 | 0.0340 |
| C10orf104  | 0.9796 | 1.0411 | 1.0631 | 0.7301 | 0.9535 | 0.0765 |
| GTSCR1     | 0.9607 | 0.9333 | 1.0919 | 0.8281 | 0.9535 | 0.0543 |
| LOC730184  | 0.9297 | 1.0351 | 0.9797 | 0.8696 | 0.9535 | 0.0353 |
| AVIL       | 0.8508 | 1.0680 | 0.9731 | 0.9222 | 0.9535 | 0.0457 |
| LOC442676  | 0.9073 | 1.0538 | 0.9909 | 0.8621 | 0.9535 | 0.0428 |
| TRAPPC4    | 0.8297 | 1.4885 | 0.8215 | 0.6744 | 0.9535 | 0.1818 |
| LOC440864  | 0.8775 | 1.0025 | 1.0072 | 0.9269 | 0.9535 | 0.0313 |
| LOC1001328 | 0.9086 | 1.1078 | 0.9550 | 0.8427 | 0.9535 | 0.0563 |
| C1orf70    | 0.8852 | 1.1128 | 1.0021 | 0.8141 | 0.9535 | 0.0657 |
| RGAG1      | 0.8776 | 0.9894 | 0.9973 | 0.9498 | 0.9535 | 0.0274 |
| LOC1001315 | 0.9956 | 1.0320 | 0.9900 | 0.7966 | 0.9535 | 0.0532 |
| C9orf25    | 0.9117 | 0.9950 | 0.8677 | 1.0397 | 0.9535 | 0.0390 |
| ZNF133     | 0.9088 | 1.1339 | 0.9622 | 0.8093 | 0.9535 | 0.0680 |
| FLJ20920   | 0.9246 | 1.1344 | 0.9480 | 0.8072 | 0.9535 | 0.0677 |
| GTF2H1     | 0.8970 | 1.0572 | 0.9914 | 0.8686 | 0.9535 | 0.0434 |
| LOC646851  | 0.8752 | 1.0320 | 0.9522 | 0.9548 | 0.9536 | 0.0320 |
| LOC1001334 | 0.8679 | 1.0659 | 1.0920 | 0.7885 | 0.9536 | 0.0744 |
| OR13C3     | 0.9452 | 1.0726 | 0.9118 | 0.8847 | 0.9536 | 0.0416 |
| F9         | 0.7669 | 1.0964 | 1.0745 | 0.8765 | 0.9536 | 0.0795 |
| LAMB1      | 0.8969 | 1.1194 | 1.0270 | 0.7710 | 0.9536 | 0.0761 |
| LOC647188  | 0.9760 | 1.0876 | 0.8552 | 0.8955 | 0.9536 | 0.0512 |
| FLJ44653   | 0.9292 | 1.0065 | 1.0378 | 0.8407 | 0.9536 | 0.0440 |
| LOC730254  | 0.8671 | 1.1227 | 0.9565 | 0.8680 | 0.9536 | 0.0601 |
| PRAMEF7    | 0.9027 | 1.0054 | 1.0255 | 0.8807 | 0.9536 | 0.0362 |
| LOC1001335 | 0.9121 | 1.0391 | 1.0072 | 0.8559 | 0.9536 | 0.0423 |
| LOC643648  | 0.9276 | 0.9971 | 0.9987 | 0.8910 | 0.9536 | 0.0266 |
| ZNF277     | 0.7632 | 1.4209 | 1.0136 | 0.6168 | 0.9536 | 0.1760 |
| NPVF       | 0.9217 | 0.9217 | 1.0158 | 0.9552 | 0.9536 | 0.0222 |
| SAP130     | 0.9331 | 1.3366 | 0.7988 | 0.7459 | 0.9536 | 0.1336 |
| PRAMEF5    | 0.8836 | 1.0541 | 1.0446 | 0.8321 | 0.9536 | 0.0563 |
| KIAA0319   | 0.9339 | 1.0321 | 0.8995 | 0.9489 | 0.9536 | 0.0281 |
| ERCC-00099 | 0.8632 | 1.1228 | 0.9896 | 0.8388 | 0.9536 | 0.0654 |
| LOC648447  | 0.8845 | 1.0383 | 1.0029 | 0.8888 | 0.9536 | 0.0393 |
| GPRASP1    | 0.8903 | 0.9728 | 1.0144 | 0.9369 | 0.9536 | 0.0264 |
| LOC641721  | 1.0056 | 1.0121 | 0.9051 | 0.8916 | 0.9536 | 0.0321 |
| LOC731957  | 0.9419 | 1.0295 | 0.9291 | 0.9139 | 0.9536 | 0.0259 |
| LOC648099  | 0.8179 | 1.0639 | 1.1807 | 0.7520 | 0.9536 | 0.1011 |
| LOC1001343 | 1.0196 | 1.0074 | 0.9325 | 0.8550 | 0.9536 | 0.0381 |
| KCNC3      | 0.9198 | 1.0860 | 0.8797 | 0.9290 | 0.9536 | 0.0454 |
| LOC729189  | 0.9617 | 0.9402 | 0.9988 | 0.9139 | 0.9536 | 0.0179 |
| SPACA5     | 0.8856 | 1.0137 | 1.0146 | 0.9007 | 0.9536 | 0.0351 |
| SULT1B1    | 0.9011 | 1.0406 | 0.9305 | 0.9423 | 0.9536 | 0.0303 |
| PAQR7      | 0.8874 | 1.1523 | 0.9285 | 0.8464 | 0.9537 | 0.0683 |
| UGT2B4     | 0.8790 | 1.0810 | 0.9732 | 0.8815 | 0.9537 | 0.0478 |
| LIPG       | 0.9027 | 1.1059 | 0.9475 | 0.8586 | 0.9537 | 0.0539 |

|            |        |        |        |        |        |        |
|------------|--------|--------|--------|--------|--------|--------|
| FLJ37543   | 0.9017 | 1.2510 | 0.8286 | 0.8334 | 0.9537 | 0.1005 |
| LOC642346  | 0.9011 | 1.0040 | 1.0530 | 0.8566 | 0.9537 | 0.0453 |
| LOC643774  | 0.9247 | 0.9743 | 1.0539 | 0.8618 | 0.9537 | 0.0406 |
| PTOV1      | 0.8230 | 1.4553 | 0.8295 | 0.7069 | 0.9537 | 0.1696 |
| NRF1       | 0.9037 | 1.0021 | 1.0275 | 0.8814 | 0.9537 | 0.0360 |
| FLJ10781   | 0.8295 | 1.0482 | 0.9904 | 0.9468 | 0.9537 | 0.0463 |
| ACTR8      | 0.8842 | 1.1718 | 1.0354 | 0.7233 | 0.9537 | 0.0967 |
| FAM84B     | 0.8629 | 1.2283 | 1.0063 | 0.7173 | 0.9537 | 0.1089 |
| LOC652676  | 1.0180 | 1.1331 | 0.7588 | 0.9049 | 0.9537 | 0.0799 |
| NDUFB6     | 0.8475 | 1.2689 | 0.9651 | 0.7333 | 0.9537 | 0.1152 |
| WIT-1      | 0.9779 | 1.0643 | 0.9190 | 0.8536 | 0.9537 | 0.0448 |
| YPEL5      | 0.9477 | 1.1500 | 0.9540 | 0.7632 | 0.9537 | 0.0790 |
| HOXC13     | 1.0489 | 1.2335 | 0.7221 | 0.8105 | 0.9537 | 0.1160 |
| TTC4       | 0.7730 | 1.3730 | 0.9897 | 0.6792 | 0.9537 | 0.1542 |
| C8orf15    | 1.0113 | 1.0601 | 0.9779 | 0.7656 | 0.9537 | 0.0649 |
| LOC728973  | 0.8589 | 1.0125 | 1.2441 | 0.6994 | 0.9537 | 0.1160 |
| LOC1001337 | 0.9337 | 0.9940 | 0.9960 | 0.8913 | 0.9537 | 0.0253 |
| DLEU7      | 0.8903 | 1.0344 | 1.0314 | 0.8589 | 0.9537 | 0.0461 |
| LOC1001318 | 0.8691 | 1.0758 | 0.9658 | 0.9043 | 0.9537 | 0.0453 |
| RYK        | 0.8199 | 1.3072 | 0.9551 | 0.7328 | 0.9538 | 0.1264 |
| LOC642223  | 0.9348 | 1.0855 | 0.9582 | 0.8367 | 0.9538 | 0.0512 |
| LOC645969  | 0.7995 | 1.2047 | 0.9878 | 0.8231 | 0.9538 | 0.0935 |
| OR51D1     | 0.8740 | 1.0548 | 0.9388 | 0.9474 | 0.9538 | 0.0375 |
| LOC649768  | 1.0363 | 1.0299 | 0.9482 | 0.8007 | 0.9538 | 0.0548 |
| DDR1       | 0.9182 | 1.2018 | 0.9339 | 0.7612 | 0.9538 | 0.0914 |
| LOC644589  | 0.9454 | 1.0103 | 1.0257 | 0.8338 | 0.9538 | 0.0436 |
| LOC440132  | 0.9663 | 0.8790 | 0.9687 | 1.0011 | 0.9538 | 0.0262 |
| LOC649174  | 0.8116 | 1.0950 | 1.0433 | 0.8652 | 0.9538 | 0.0683 |
| LOC440925  | 0.8663 | 1.0639 | 0.9888 | 0.8962 | 0.9538 | 0.0450 |
| RNASE8     | 0.7989 | 1.0542 | 1.0544 | 0.9077 | 0.9538 | 0.0621 |
| MIR2115    | 0.8731 | 1.1222 | 0.9373 | 0.8826 | 0.9538 | 0.0579 |
| LOC649379  | 0.8998 | 0.9898 | 1.0904 | 0.8351 | 0.9538 | 0.0555 |
| OR10G4     | 0.8688 | 1.1141 | 0.9368 | 0.8956 | 0.9538 | 0.0552 |
| LOC730031  | 0.8836 | 1.1045 | 0.9446 | 0.8826 | 0.9538 | 0.0523 |
| LOC1001334 | 0.9613 | 1.0385 | 0.9465 | 0.8690 | 0.9538 | 0.0347 |
| FAM167A    | 0.8511 | 1.0791 | 1.0275 | 0.8575 | 0.9538 | 0.0584 |
| C1orf9     | 0.8790 | 1.0417 | 1.0052 | 0.8892 | 0.9538 | 0.0410 |
| GRHL3      | 0.9853 | 1.0398 | 0.9324 | 0.8578 | 0.9538 | 0.0388 |
| SNORA5B    | 0.8048 | 1.1350 | 0.9889 | 0.8865 | 0.9538 | 0.0712 |
| SLCO3A1    | 0.8713 | 1.0614 | 0.9903 | 0.8923 | 0.9538 | 0.0443 |
| SNORA11E   | 0.8771 | 1.2305 | 0.9290 | 0.7786 | 0.9538 | 0.0974 |
| NROB2      | 0.9133 | 0.9525 | 1.0591 | 0.8905 | 0.9538 | 0.0373 |
| GSTM1      | 0.9309 | 1.0420 | 0.9191 | 0.9233 | 0.9538 | 0.0295 |
| GJB5       | 0.9280 | 0.8819 | 1.0122 | 0.9933 | 0.9538 | 0.0300 |
| LOC253573  | 0.9193 | 1.1447 | 0.9579 | 0.7934 | 0.9538 | 0.0727 |
| BVES       | 0.9264 | 1.0786 | 0.9670 | 0.8434 | 0.9538 | 0.0489 |

|            |        |        |        |        |        |        |
|------------|--------|--------|--------|--------|--------|--------|
| SLC22A11   | 0.8830 | 1.0918 | 0.9359 | 0.9046 | 0.9538 | 0.0472 |
| LOC1001335 | 0.9127 | 1.0114 | 0.9818 | 0.9094 | 0.9538 | 0.0254 |
| ZC3H13     | 0.9569 | 0.9309 | 0.9918 | 0.9358 | 0.9539 | 0.0139 |
| ZFYVE9     | 0.8183 | 1.1554 | 0.9911 | 0.8507 | 0.9539 | 0.0769 |
| LOC728789  | 0.9311 | 0.9788 | 0.9187 | 0.9869 | 0.9539 | 0.0170 |
| LOC643937  | 0.9290 | 1.1973 | 0.8642 | 0.8249 | 0.9539 | 0.0839 |
| LOC648615  | 1.0334 | 1.0699 | 0.8093 | 0.9029 | 0.9539 | 0.0601 |
| PDCL3      | 0.7235 | 1.3744 | 1.0190 | 0.6988 | 0.9539 | 0.1579 |
| LOC652663  | 0.9729 | 0.9815 | 0.9852 | 0.8759 | 0.9539 | 0.0261 |
| C10orf4    | 0.9134 | 1.0260 | 1.0008 | 0.8754 | 0.9539 | 0.0356 |
| LOC345643  | 0.9890 | 1.0470 | 0.9271 | 0.8525 | 0.9539 | 0.0417 |
| TncRNA     | 0.9954 | 1.0781 | 0.8590 | 0.8831 | 0.9539 | 0.0510 |
| LOC648460  | 0.9498 | 0.9955 | 0.9491 | 0.9212 | 0.9539 | 0.0154 |
| MSI2       | 0.7669 | 1.2759 | 0.9345 | 0.8383 | 0.9539 | 0.1127 |
| RCSD1      | 0.8382 | 1.0333 | 1.1075 | 0.8366 | 0.9539 | 0.0690 |
| C21orf89   | 0.9459 | 0.9644 | 1.0310 | 0.8745 | 0.9539 | 0.0322 |
| FLJ45340   | 0.8933 | 1.0725 | 0.9517 | 0.8982 | 0.9539 | 0.0417 |
| LOC646997  | 0.9571 | 1.0265 | 1.0066 | 0.8255 | 0.9539 | 0.0452 |
| GDAP2      | 0.7819 | 1.1429 | 1.0539 | 0.8370 | 0.9539 | 0.0861 |
| BEX2       | 0.8545 | 1.4456 | 0.8419 | 0.6737 | 0.9539 | 0.1690 |
| LOC647786  | 0.9784 | 1.0038 | 1.0368 | 0.7968 | 0.9539 | 0.0537 |
| C8orf58    | 0.8300 | 1.0254 | 1.0513 | 0.9091 | 0.9539 | 0.0516 |
| LOC1001326 | 0.9050 | 1.1079 | 0.9326 | 0.8702 | 0.9539 | 0.0529 |
| CPA3       | 0.9601 | 1.1057 | 0.8571 | 0.8929 | 0.9540 | 0.0549 |
| ASCL5      | 0.8162 | 1.0783 | 1.0046 | 0.9167 | 0.9540 | 0.0566 |
| ASAH2C     | 0.8952 | 1.1329 | 1.0536 | 0.7341 | 0.9540 | 0.0884 |
| ING4       | 0.9346 | 1.0525 | 0.9282 | 0.9005 | 0.9540 | 0.0337 |
| LOC653658  | 0.8888 | 0.9401 | 1.3813 | 0.6056 | 0.9540 | 0.1603 |
| SCN10A     | 0.8956 | 1.0791 | 0.9809 | 0.8602 | 0.9540 | 0.0488 |
| TTC9B      | 0.9408 | 1.0806 | 0.8872 | 0.9073 | 0.9540 | 0.0436 |
| SNORD113-6 | 0.8626 | 1.1604 | 0.9015 | 0.8915 | 0.9540 | 0.0693 |
| C9orf78    | 0.7047 | 1.3699 | 1.0640 | 0.6773 | 0.9540 | 0.1643 |
| LOC442442  | 0.9004 | 1.0571 | 1.0482 | 0.8102 | 0.9540 | 0.0599 |
| PRR20B     | 0.8386 | 1.0550 | 1.0702 | 0.8521 | 0.9540 | 0.0628 |
| PRDM1      | 0.8983 | 1.0291 | 1.0047 | 0.8838 | 0.9540 | 0.0368 |
| LOC652734  | 0.9033 | 1.0525 | 0.9795 | 0.8807 | 0.9540 | 0.0390 |
| LOC644897  | 0.8523 | 1.0539 | 1.0731 | 0.8366 | 0.9540 | 0.0634 |
| LOC1001330 | 0.8766 | 0.9930 | 1.0018 | 0.9446 | 0.9540 | 0.0287 |
| LOC442535  | 0.8495 | 1.0685 | 1.0040 | 0.8940 | 0.9540 | 0.0501 |
| LOC650236  | 0.9427 | 1.0803 | 0.9272 | 0.8658 | 0.9540 | 0.0453 |
| LOC645777  | 0.8293 | 1.0950 | 0.9754 | 0.9163 | 0.9540 | 0.0558 |
| BCAP31     | 0.7958 | 1.4307 | 0.9277 | 0.6618 | 0.9540 | 0.1679 |
| CXXC4      | 0.9618 | 1.0848 | 0.9159 | 0.8535 | 0.9540 | 0.0489 |
| LOC1001342 | 0.8943 | 0.9729 | 0.9493 | 0.9995 | 0.9540 | 0.0224 |
| LOC729970  | 0.9251 | 0.9258 | 1.1578 | 0.8073 | 0.9540 | 0.0734 |
| LOC651614  | 0.9113 | 1.1022 | 0.9671 | 0.8354 | 0.9540 | 0.0563 |

|            |        |        |        |        |        |        |
|------------|--------|--------|--------|--------|--------|--------|
| LOC645671  | 0.9633 | 1.0428 | 0.9669 | 0.8431 | 0.9540 | 0.0413 |
| ADAMTS14   | 0.9432 | 1.0140 | 0.9828 | 0.8761 | 0.9540 | 0.0297 |
| LOC440795  | 0.9409 | 1.1461 | 0.9360 | 0.7930 | 0.9540 | 0.0726 |
| MIER2      | 0.8274 | 1.0982 | 1.0156 | 0.8749 | 0.9540 | 0.0625 |
| LOC649383  | 0.8333 | 0.9888 | 1.0761 | 0.9179 | 0.9540 | 0.0516 |
| HSPCAL3    | 0.9114 | 1.0585 | 0.9520 | 0.8944 | 0.9540 | 0.0368 |
| LOC647533  | 0.8879 | 0.9976 | 1.0206 | 0.9100 | 0.9541 | 0.0325 |
| FAM74A3    | 0.8887 | 1.0675 | 0.9738 | 0.8861 | 0.9541 | 0.0430 |
| FLJ25328   | 0.8790 | 1.1064 | 0.9787 | 0.8521 | 0.9541 | 0.0576 |
| MAP3K7IP3  | 0.8465 | 1.1255 | 1.0103 | 0.8339 | 0.9541 | 0.0699 |
| LOC387934  | 0.7880 | 1.0371 | 1.1422 | 0.8489 | 0.9541 | 0.0821 |
| LOC643377  | 0.9897 | 0.9831 | 1.0144 | 0.8292 | 0.9541 | 0.0422 |
| HBQ1       | 0.8578 | 1.1646 | 0.8581 | 0.9358 | 0.9541 | 0.0725 |
| PTCHD2     | 0.9321 | 1.0361 | 0.9396 | 0.9086 | 0.9541 | 0.0281 |
| LOC645487  | 0.8846 | 1.0341 | 1.0118 | 0.8859 | 0.9541 | 0.0400 |
| HS3ST2     | 0.8921 | 1.0466 | 0.9651 | 0.9126 | 0.9541 | 0.0345 |
| LOC645084  | 0.9270 | 1.0924 | 0.8530 | 0.9440 | 0.9541 | 0.0501 |
| LOC441864  | 0.8462 | 1.2394 | 0.8801 | 0.8507 | 0.9541 | 0.0954 |
| PRKCZ      | 0.9196 | 1.1873 | 0.9212 | 0.7885 | 0.9541 | 0.0837 |
| LOC199897  | 0.9041 | 1.1833 | 0.9011 | 0.8280 | 0.9541 | 0.0784 |
| FLJ44005   | 0.8028 | 1.0494 | 1.0377 | 0.9266 | 0.9541 | 0.0575 |
| LOC643293  | 0.9747 | 1.0127 | 0.9849 | 0.8442 | 0.9541 | 0.0375 |
| ABCC6P2    | 1.0307 | 1.1383 | 0.8957 | 0.7519 | 0.9541 | 0.0837 |
| LOC439985  | 0.8511 | 0.9981 | 0.9985 | 0.9689 | 0.9541 | 0.0350 |
| LOC119358  | 0.9076 | 1.0356 | 0.9340 | 0.9394 | 0.9541 | 0.0280 |
| LOC651809  | 0.8609 | 1.0085 | 0.9806 | 0.9666 | 0.9541 | 0.0323 |
| EIF4E      | 0.9282 | 1.0405 | 0.9637 | 0.8843 | 0.9541 | 0.0330 |
| CLYBL      | 0.7658 | 1.2532 | 1.0715 | 0.7261 | 0.9542 | 0.1261 |
| PTGES      | 0.8747 | 0.9909 | 1.0281 | 0.9229 | 0.9542 | 0.0343 |
| LOC339788  | 0.9243 | 1.0077 | 0.9666 | 0.9180 | 0.9542 | 0.0208 |
| LOC653234  | 0.9443 | 1.1021 | 0.8656 | 0.9047 | 0.9542 | 0.0519 |
| MIR579     | 0.8688 | 1.0486 | 0.9969 | 0.9025 | 0.9542 | 0.0415 |
| CRLF1      | 0.8951 | 1.0623 | 1.0124 | 0.8469 | 0.9542 | 0.0501 |
| SNORD12C   | 0.8539 | 0.9484 | 1.1121 | 0.9024 | 0.9542 | 0.0560 |
| LOC644809  | 0.8161 | 1.0914 | 1.0134 | 0.8959 | 0.9542 | 0.0611 |
| LOC654118  | 0.8646 | 1.0273 | 1.0776 | 0.8473 | 0.9542 | 0.0577 |
| LOC1001305 | 0.9163 | 1.0021 | 0.9945 | 0.9038 | 0.9542 | 0.0257 |
| LOC163233  | 0.8937 | 1.0586 | 0.9780 | 0.8865 | 0.9542 | 0.0405 |
| CSK        | 0.8641 | 1.4883 | 0.8509 | 0.6136 | 0.9542 | 0.1871 |
| LOC727765  | 0.9454 | 1.0469 | 0.9466 | 0.8780 | 0.9542 | 0.0348 |
| CUZD1      | 0.8674 | 1.0738 | 0.9705 | 0.9051 | 0.9542 | 0.0452 |
| AKR1E2     | 0.9108 | 1.0981 | 0.9298 | 0.8781 | 0.9542 | 0.0491 |
| IL15RA     | 0.8839 | 1.0419 | 0.9798 | 0.9112 | 0.9542 | 0.0355 |
| LETMD1     | 0.8214 | 1.3905 | 0.9168 | 0.6883 | 0.9542 | 0.1528 |
| LOC1001287 | 0.8147 | 1.0183 | 1.0430 | 0.9408 | 0.9542 | 0.0513 |
| BEST4      | 0.9709 | 1.0501 | 0.9961 | 0.7998 | 0.9542 | 0.0541 |

|           |        |        |        |        |        |        |
|-----------|--------|--------|--------|--------|--------|--------|
| LOC647013 | 0.9492 | 0.9267 | 1.0095 | 0.9316 | 0.9542 | 0.0190 |
| LOC644187 | 0.8667 | 0.9721 | 1.0715 | 0.9066 | 0.9542 | 0.0447 |
| APLF      | 0.9620 | 1.0370 | 0.9256 | 0.8924 | 0.9543 | 0.0310 |
| LRRC59    | 0.8365 | 1.0349 | 0.9824 | 0.9632 | 0.9543 | 0.0421 |
| FCGR2B    | 0.8407 | 1.1416 | 1.0255 | 0.8093 | 0.9543 | 0.0786 |
| TXNL4A    | 0.8065 | 1.1883 | 1.0109 | 0.8114 | 0.9543 | 0.0914 |
| EMB       | 0.8480 | 1.0329 | 0.9998 | 0.9364 | 0.9543 | 0.0407 |
| ELAC1     | 0.8651 | 1.0724 | 1.0560 | 0.8236 | 0.9543 | 0.0641 |
| S100A7A   | 0.9107 | 0.9791 | 1.0747 | 0.8527 | 0.9543 | 0.0477 |
| TAAR3     | 0.8332 | 0.9906 | 1.0086 | 0.9848 | 0.9543 | 0.0407 |
| RBPMS     | 0.9535 | 1.0233 | 0.9758 | 0.8645 | 0.9543 | 0.0333 |
| ZNF347    | 0.9215 | 1.0700 | 0.9740 | 0.8518 | 0.9543 | 0.0460 |
| ARL8A     | 0.8043 | 1.1372 | 0.9898 | 0.8860 | 0.9543 | 0.0718 |
| GNA15     | 0.8692 | 0.9745 | 0.9886 | 0.9850 | 0.9543 | 0.0285 |
| LOC653632 | 0.9421 | 1.0085 | 0.9119 | 0.9548 | 0.9543 | 0.0202 |
| LOC646818 | 0.8531 | 1.0137 | 1.0370 | 0.9136 | 0.9543 | 0.0431 |
| LOC654046 | 0.9179 | 1.0000 | 0.9862 | 0.9132 | 0.9543 | 0.0226 |
| LOC132203 | 0.9428 | 1.0090 | 0.9889 | 0.8765 | 0.9543 | 0.0294 |
| NFKBIL1   | 0.9051 | 1.1026 | 0.8950 | 0.9147 | 0.9543 | 0.0496 |
| LOC388755 | 0.8847 | 0.9432 | 1.1086 | 0.8809 | 0.9543 | 0.0534 |
| C3orf51   | 1.0053 | 0.9911 | 0.9451 | 0.8758 | 0.9544 | 0.0292 |
| IGFALS    | 0.8098 | 1.0647 | 1.0702 | 0.8727 | 0.9544 | 0.0666 |
| RASL11A   | 0.9408 | 1.0391 | 1.0398 | 0.7978 | 0.9544 | 0.0571 |
| FAM193B   | 0.8760 | 1.0692 | 0.9829 | 0.8894 | 0.9544 | 0.0451 |
| PRR8      | 0.7964 | 1.0805 | 0.9671 | 0.9736 | 0.9544 | 0.0587 |
| RGS2      | 0.8722 | 0.9756 | 1.0579 | 0.9118 | 0.9544 | 0.0406 |
| LOC646449 | 0.9870 | 1.0236 | 0.9628 | 0.8442 | 0.9544 | 0.0388 |
| ABCC2     | 0.8832 | 1.0075 | 0.9796 | 0.9472 | 0.9544 | 0.0267 |
| LOC646914 | 0.9299 | 1.0944 | 0.9875 | 0.8058 | 0.9544 | 0.0601 |
| CDGAP     | 0.9809 | 0.9843 | 0.9453 | 0.9070 | 0.9544 | 0.0181 |
| C10orf93  | 0.9202 | 1.0563 | 0.9834 | 0.8577 | 0.9544 | 0.0426 |
| CSN3      | 0.9817 | 1.0242 | 0.9457 | 0.8660 | 0.9544 | 0.0335 |
| HYLS1     | 0.8397 | 1.1540 | 1.0101 | 0.8138 | 0.9544 | 0.0795 |
| FAM20A    | 0.9330 | 1.0036 | 1.0206 | 0.8605 | 0.9544 | 0.0366 |
| LOC642530 | 0.9325 | 1.0245 | 0.9842 | 0.8765 | 0.9544 | 0.0321 |
| ZNF385C   | 0.6738 | 1.0814 | 0.9949 | 1.0676 | 0.9544 | 0.0954 |
| ERP44     | 0.9257 | 1.0263 | 0.9299 | 0.9358 | 0.9544 | 0.0241 |
| LOC730284 | 0.8857 | 1.1776 | 0.8915 | 0.8629 | 0.9544 | 0.0747 |
| APOL3     | 0.8703 | 1.1075 | 0.9855 | 0.8544 | 0.9544 | 0.0588 |
| LOC619207 | 0.8597 | 1.0535 | 1.0013 | 0.9033 | 0.9544 | 0.0443 |
| LOC646428 | 0.9880 | 0.9978 | 0.9386 | 0.8934 | 0.9544 | 0.0241 |
| FLJ44861  | 0.8472 | 1.0209 | 1.0817 | 0.8680 | 0.9545 | 0.0574 |
| IFI44L    | 0.9445 | 1.0553 | 0.9759 | 0.8421 | 0.9545 | 0.0441 |
| LOC645722 | 0.9388 | 1.0146 | 1.0276 | 0.8368 | 0.9545 | 0.0438 |
| GALNTL2   | 0.9276 | 0.9564 | 0.9978 | 0.9362 | 0.9545 | 0.0156 |
| LOC642946 | 0.9510 | 1.1014 | 0.9489 | 0.8167 | 0.9545 | 0.0582 |

|            |        |        |        |        |        |        |
|------------|--------|--------|--------|--------|--------|--------|
| ESRRB      | 0.8252 | 1.0320 | 1.0077 | 0.9531 | 0.9545 | 0.0461 |
| LOC442570  | 0.8158 | 1.0569 | 0.9542 | 0.9911 | 0.9545 | 0.0509 |
| LOC650496  | 0.9429 | 0.9869 | 0.9820 | 0.9064 | 0.9545 | 0.0188 |
| PPP3R1     | 0.7896 | 1.3727 | 0.8809 | 0.7748 | 0.9545 | 0.1414 |
| LOC1001317 | 0.9541 | 1.0776 | 0.9963 | 0.7900 | 0.9545 | 0.0605 |
| LOC1001309 | 0.8590 | 1.1730 | 0.9971 | 0.7889 | 0.9545 | 0.0847 |
| SUSD3      | 0.9528 | 0.9601 | 1.0279 | 0.8774 | 0.9545 | 0.0308 |
| NPY6R      | 0.9726 | 0.9554 | 0.9631 | 0.9271 | 0.9545 | 0.0098 |
| SFRS11     | 0.9194 | 1.0421 | 1.0814 | 0.7754 | 0.9546 | 0.0690 |
| JAZF1      | 0.8187 | 1.1341 | 1.0139 | 0.8515 | 0.9546 | 0.0735 |
| LOC728290  | 0.9217 | 0.9369 | 0.9767 | 0.9829 | 0.9546 | 0.0149 |
| ATXN2L     | 0.9085 | 1.0779 | 0.9351 | 0.8967 | 0.9546 | 0.0419 |
| MIR218-2   | 0.9271 | 1.0815 | 0.9050 | 0.9047 | 0.9546 | 0.0426 |
| PRHOXNB    | 0.9296 | 1.0031 | 0.9788 | 0.9069 | 0.9546 | 0.0221 |
| HRASLS5    | 0.9769 | 1.0115 | 1.0351 | 0.7948 | 0.9546 | 0.0546 |
| AFAP1L1    | 0.8731 | 1.0347 | 1.0730 | 0.8375 | 0.9546 | 0.0583 |
| SMOX       | 0.8943 | 1.0004 | 1.0504 | 0.8733 | 0.9546 | 0.0424 |
| LBH        | 0.8970 | 1.0985 | 0.9352 | 0.8877 | 0.9546 | 0.0491 |
| T1560      | 0.7786 | 1.0939 | 1.0235 | 0.9225 | 0.9546 | 0.0684 |
| LOC728318  | 0.9820 | 0.9786 | 0.9420 | 0.9157 | 0.9546 | 0.0158 |
| PSG3       | 0.9721 | 0.9919 | 0.9509 | 0.9035 | 0.9546 | 0.0190 |
| BECN1L1    | 0.9592 | 0.9740 | 0.9888 | 0.8964 | 0.9546 | 0.0203 |
| LOC1001335 | 0.8373 | 1.0606 | 0.9951 | 0.9253 | 0.9546 | 0.0479 |
| POP5       | 0.8117 | 1.2144 | 1.0043 | 0.7879 | 0.9546 | 0.0992 |
| LOC388438  | 0.9212 | 0.9989 | 1.0094 | 0.8889 | 0.9546 | 0.0294 |
| C16orf56   | 0.8832 | 1.3621 | 0.8381 | 0.7349 | 0.9546 | 0.1393 |
| LOC727748  | 0.8214 | 1.0883 | 0.9872 | 0.9215 | 0.9546 | 0.0561 |
| LOC652288  | 1.0164 | 1.0309 | 0.9580 | 0.8132 | 0.9546 | 0.0497 |
| LOC1001323 | 0.8986 | 1.0239 | 1.0056 | 0.8904 | 0.9546 | 0.0349 |
| CES1       | 0.9095 | 1.0666 | 0.9323 | 0.9100 | 0.9546 | 0.0377 |
| LOC644300  | 0.9342 | 1.0465 | 0.9400 | 0.8979 | 0.9546 | 0.0320 |
| GPIHBP1    | 0.9579 | 1.0007 | 0.9847 | 0.8754 | 0.9546 | 0.0279 |
| KRT18P17   | 0.9092 | 1.1171 | 0.9643 | 0.8280 | 0.9546 | 0.0610 |
| LOC730243  | 0.7982 | 1.1033 | 1.0250 | 0.8920 | 0.9546 | 0.0680 |
| LIME1      | 0.7743 | 1.2297 | 0.8300 | 0.9846 | 0.9546 | 0.1019 |
| LOC651091  | 0.8957 | 1.0263 | 0.9366 | 0.9601 | 0.9547 | 0.0273 |
| PRAMEF3    | 0.9282 | 1.0356 | 0.9533 | 0.9015 | 0.9547 | 0.0290 |
| RND2       | 1.0393 | 0.9530 | 1.0204 | 0.8060 | 0.9547 | 0.0529 |
| KCNMB3     | 0.9024 | 1.0520 | 0.9533 | 0.9110 | 0.9547 | 0.0343 |
| LOC730078  | 0.8665 | 1.0096 | 1.0489 | 0.8936 | 0.9547 | 0.0442 |
| LOC642434  | 0.9149 | 0.9744 | 1.0484 | 0.8809 | 0.9547 | 0.0367 |
| LOC643695  | 0.8851 | 0.9596 | 1.0941 | 0.8799 | 0.9547 | 0.0499 |
| CRYGC      | 0.9500 | 0.9831 | 0.9444 | 0.9411 | 0.9547 | 0.0097 |
| LOC645869  | 0.8913 | 0.9964 | 1.0316 | 0.8995 | 0.9547 | 0.0350 |
| PPCDC      | 0.9395 | 1.0443 | 1.0454 | 0.7896 | 0.9547 | 0.0604 |
| LOC648608  | 0.9602 | 1.0104 | 1.0707 | 0.7775 | 0.9547 | 0.0632 |



|            |        |        |        |        |        |        |
|------------|--------|--------|--------|--------|--------|--------|
| CHMP7      | 0.8657 | 1.1847 | 0.8983 | 0.8701 | 0.9547 | 0.0770 |
| LRRC16     | 0.9587 | 1.0534 | 0.9905 | 0.8162 | 0.9547 | 0.0502 |
| LOC339742  | 0.9241 | 1.0197 | 1.0280 | 0.8470 | 0.9547 | 0.0430 |
| LOC440551  | 0.9795 | 1.0601 | 0.8955 | 0.8837 | 0.9547 | 0.0411 |
| USP16      | 0.8460 | 1.2174 | 1.0846 | 0.6708 | 0.9547 | 0.1219 |
| FLJ22536   | 0.8687 | 1.1095 | 0.9685 | 0.8721 | 0.9547 | 0.0565 |
| LOC402693  | 0.9365 | 1.0123 | 1.0092 | 0.8608 | 0.9547 | 0.0359 |
| SNX33      | 0.8338 | 1.0179 | 1.0686 | 0.8987 | 0.9547 | 0.0538 |
| LOC643220  | 0.8850 | 1.0404 | 1.0456 | 0.8480 | 0.9547 | 0.0515 |
| MIR596     | 0.9434 | 1.0141 | 0.9832 | 0.8783 | 0.9547 | 0.0293 |
| LOC1001343 | 0.9041 | 1.0977 | 0.9233 | 0.8939 | 0.9547 | 0.0480 |
| FADS6      | 0.9152 | 1.0301 | 0.9111 | 0.9626 | 0.9547 | 0.0277 |
| POMT1      | 0.8770 | 1.2123 | 0.9344 | 0.7953 | 0.9547 | 0.0905 |
| LOC144678  | 0.9384 | 1.1190 | 0.9501 | 0.8116 | 0.9547 | 0.0631 |
| ARSG       | 0.9377 | 0.8987 | 1.0527 | 0.9299 | 0.9548 | 0.0337 |
| MIRLET7D   | 1.0529 | 0.9774 | 0.9670 | 0.8217 | 0.9548 | 0.0483 |
| LOC220429  | 0.8412 | 0.9535 | 1.0507 | 0.9737 | 0.9548 | 0.0433 |
| MGC34800   | 0.8436 | 1.0206 | 0.9651 | 0.9898 | 0.9548 | 0.0388 |
| SCAF1      | 0.8860 | 0.9983 | 0.9809 | 0.9539 | 0.9548 | 0.0247 |
| FRMD7      | 0.8462 | 1.0310 | 1.0632 | 0.8787 | 0.9548 | 0.0541 |
| LOC652424  | 0.7596 | 1.0686 | 1.0788 | 0.9121 | 0.9548 | 0.0754 |
| IKZF3      | 0.8026 | 1.1883 | 0.9834 | 0.8449 | 0.9548 | 0.0869 |
| MEF2A      | 0.8761 | 1.0317 | 0.9685 | 0.9428 | 0.9548 | 0.0322 |
| LOC1001342 | 0.8479 | 1.0826 | 0.9843 | 0.9044 | 0.9548 | 0.0510 |
| POM121     | 0.9291 | 1.0865 | 0.9354 | 0.8683 | 0.9548 | 0.0464 |
| NLRP1      | 0.9128 | 1.0162 | 1.0189 | 0.8713 | 0.9548 | 0.0372 |
| HBEGF      | 0.7819 | 1.2642 | 0.9422 | 0.8309 | 0.9548 | 0.1084 |
| LOC1001288 | 0.8819 | 1.0532 | 1.0583 | 0.8258 | 0.9548 | 0.0594 |
| PWWP2A     | 0.9827 | 1.1214 | 1.0050 | 0.7101 | 0.9548 | 0.0870 |
| PHF11      | 0.9044 | 1.0024 | 0.9770 | 0.9354 | 0.9548 | 0.0218 |
| PGBD2      | 0.8129 | 1.1151 | 1.0643 | 0.8270 | 0.9548 | 0.0786 |
| LOC649500  | 0.9699 | 1.0010 | 0.9160 | 0.9325 | 0.9548 | 0.0191 |
| KNDC1      | 0.9102 | 1.0116 | 1.0459 | 0.8517 | 0.9548 | 0.0449 |
| OR8B3      | 0.9446 | 1.0215 | 0.9891 | 0.8642 | 0.9549 | 0.0341 |
| LOC1001299 | 0.8822 | 1.0272 | 0.9996 | 0.9104 | 0.9549 | 0.0348 |
| MUC3A      | 0.9028 | 0.9559 | 1.0028 | 0.9580 | 0.9549 | 0.0205 |
| MAGEB18    | 0.8936 | 1.0500 | 1.0355 | 0.8403 | 0.9549 | 0.0520 |
| DAPL1      | 0.7746 | 1.1426 | 1.0343 | 0.8679 | 0.9549 | 0.0825 |
| ARHGAP1    | 0.9153 | 1.2437 | 0.8648 | 0.7957 | 0.9549 | 0.0994 |
| LOC388948  | 0.9439 | 1.0246 | 0.9708 | 0.8802 | 0.9549 | 0.0300 |
| LOC647995  | 0.8474 | 1.1117 | 0.9740 | 0.8865 | 0.9549 | 0.0586 |
| OR10A7     | 0.7893 | 1.1131 | 0.8979 | 1.0192 | 0.9549 | 0.0706 |
| SLC5A8     | 0.9232 | 1.1299 | 0.9175 | 0.8489 | 0.9549 | 0.0607 |
| POTEC      | 1.0013 | 1.0173 | 0.9135 | 0.8875 | 0.9549 | 0.0320 |
| LOC647413  | 0.9070 | 0.9891 | 0.9981 | 0.9254 | 0.9549 | 0.0227 |
| DSG4       | 0.8925 | 0.9910 | 0.9831 | 0.9530 | 0.9549 | 0.0224 |

|            |        |        |        |        |        |        |
|------------|--------|--------|--------|--------|--------|--------|
| LOC1001318 | 0.9933 | 1.0203 | 1.0421 | 0.7641 | 0.9549 | 0.0644 |
| MIR591     | 0.9539 | 1.0194 | 1.0410 | 0.8055 | 0.9549 | 0.0531 |
| PTGDS      | 0.9509 | 1.0523 | 0.9187 | 0.8979 | 0.9549 | 0.0342 |
| LOC732300  | 1.0204 | 0.9292 | 0.9987 | 0.8716 | 0.9550 | 0.0339 |
| LOC731602  | 0.8324 | 1.0736 | 1.1004 | 0.8135 | 0.9550 | 0.0765 |
| LOC1001324 | 0.9229 | 1.0613 | 0.9921 | 0.8436 | 0.9550 | 0.0466 |
| LOC727832  | 0.9418 | 1.0197 | 0.9493 | 0.9091 | 0.9550 | 0.0233 |
| RPE65      | 0.8704 | 1.0970 | 1.0658 | 0.7868 | 0.9550 | 0.0752 |
| LOC653412  | 0.9867 | 0.9369 | 0.9765 | 0.9199 | 0.9550 | 0.0159 |
| LOC642471  | 0.8482 | 1.0334 | 0.9393 | 0.9990 | 0.9550 | 0.0406 |
| C2orf78    | 0.9490 | 1.1597 | 0.7760 | 0.9354 | 0.9550 | 0.0787 |
| LOC730375  | 0.8935 | 0.9891 | 0.9959 | 0.9416 | 0.9550 | 0.0238 |
| REG1A      | 0.9686 | 0.9814 | 1.0568 | 0.8133 | 0.9550 | 0.0511 |
| RALGPS2    | 0.9386 | 1.0399 | 0.9805 | 0.8612 | 0.9550 | 0.0376 |
| SPTBN4     | 0.9269 | 1.1314 | 0.9118 | 0.8500 | 0.9550 | 0.0611 |
| CFB        | 1.0056 | 1.0271 | 1.0076 | 0.7799 | 0.9551 | 0.0586 |
| TMEM40     | 0.8610 | 1.0667 | 0.9550 | 0.9376 | 0.9551 | 0.0425 |
| LOC1001328 | 0.7773 | 1.0686 | 1.1142 | 0.8602 | 0.9551 | 0.0811 |
| LOC645705  | 1.0226 | 0.9668 | 1.0122 | 0.8187 | 0.9551 | 0.0470 |
| TMEM233    | 0.8809 | 1.0446 | 1.0017 | 0.8933 | 0.9551 | 0.0403 |
| WASH2P     | 0.8835 | 1.1789 | 0.8356 | 0.9224 | 0.9551 | 0.0767 |
| RBMS3      | 0.8983 | 1.0366 | 1.0054 | 0.8801 | 0.9551 | 0.0388 |
| C14orf149  | 1.0132 | 1.0698 | 1.0116 | 0.7258 | 0.9551 | 0.0776 |
| LOC400145  | 0.9622 | 1.0167 | 0.9856 | 0.8559 | 0.9551 | 0.0349 |
| DAZ4       | 0.9388 | 1.0915 | 0.9678 | 0.8223 | 0.9551 | 0.0553 |
| DUB3       | 0.8156 | 0.9919 | 1.0977 | 0.9153 | 0.9551 | 0.0597 |
| ARPC5      | 0.9761 | 1.0003 | 1.3202 | 0.5240 | 0.9551 | 0.1637 |
| CES4       | 0.8861 | 0.9977 | 0.9690 | 0.9678 | 0.9551 | 0.0240 |
| POU3F3     | 0.8330 | 1.0597 | 0.9858 | 0.9421 | 0.9551 | 0.0474 |
| SLC16A2    | 0.9184 | 1.0199 | 0.9265 | 0.9558 | 0.9551 | 0.0230 |
| OR7D2      | 0.9175 | 0.9823 | 0.9906 | 0.9302 | 0.9551 | 0.0183 |
| RIPPLY2    | 0.9147 | 1.0175 | 0.9634 | 0.9251 | 0.9551 | 0.0233 |
| OR5AP2     | 0.9490 | 1.0449 | 0.9724 | 0.8543 | 0.9551 | 0.0393 |
| LOC1001319 | 0.9021 | 1.0813 | 0.9678 | 0.8693 | 0.9552 | 0.0468 |
| TP53TG3    | 0.8772 | 1.2132 | 1.0340 | 0.6962 | 0.9552 | 0.1103 |
| HDAC10     | 0.9010 | 1.0594 | 1.0473 | 0.8129 | 0.9552 | 0.0595 |
| BEND6      | 0.8757 | 1.0834 | 0.9600 | 0.9015 | 0.9552 | 0.0462 |
| LOC1001285 | 0.8845 | 1.1082 | 1.0346 | 0.7934 | 0.9552 | 0.0712 |
| CCL23      | 0.8618 | 1.0287 | 1.0241 | 0.9060 | 0.9552 | 0.0421 |
| LOC644403  | 0.8878 | 0.9138 | 1.0643 | 0.9548 | 0.9552 | 0.0389 |
| LOC389370  | 0.8263 | 1.0141 | 0.9802 | 1.0000 | 0.9552 | 0.0435 |
| LOC339766  | 0.8810 | 1.0569 | 1.0344 | 0.8484 | 0.9552 | 0.0529 |
| LOC648749  | 0.9738 | 0.9999 | 0.9235 | 0.9235 | 0.9552 | 0.0191 |
| LOC653559  | 0.8628 | 1.0359 | 0.9632 | 0.9588 | 0.9552 | 0.0355 |
| IL6        | 0.9536 | 1.0183 | 0.9359 | 0.9129 | 0.9552 | 0.0226 |
| UFSP2      | 0.8605 | 1.2279 | 1.0042 | 0.7281 | 0.9552 | 0.1070 |

|            |        |        |        |        |        |        |
|------------|--------|--------|--------|--------|--------|--------|
| LOC648963  | 0.9158 | 1.1680 | 0.9380 | 0.7990 | 0.9552 | 0.0772 |
| C8orf4     | 0.8913 | 1.0496 | 0.9775 | 0.9024 | 0.9552 | 0.0368 |
| LOC389936  | 0.9311 | 0.9323 | 1.0267 | 0.9308 | 0.9552 | 0.0238 |
| NKX6-3     | 0.9274 | 1.0323 | 0.9490 | 0.9122 | 0.9552 | 0.0268 |
| LOC651116  | 0.9042 | 1.0368 | 0.9375 | 0.9423 | 0.9552 | 0.0285 |
| LOC389267  | 0.8490 | 1.1083 | 0.9330 | 0.9306 | 0.9552 | 0.0546 |
| PAK2       | 0.6183 | 1.2611 | 1.2252 | 0.7163 | 0.9552 | 0.1676 |
| LOC642743  | 0.9462 | 0.9482 | 1.0211 | 0.9054 | 0.9552 | 0.0241 |
| CCDC87     | 0.8686 | 1.1038 | 1.0850 | 0.7635 | 0.9552 | 0.0833 |
| LOC647783  | 0.7869 | 0.9832 | 1.0532 | 0.9976 | 0.9552 | 0.0581 |
| FLJ44606   | 0.9345 | 1.1678 | 1.0043 | 0.7143 | 0.9552 | 0.0940 |
| CLEC1B     | 0.9817 | 1.0082 | 0.9470 | 0.8841 | 0.9552 | 0.0268 |
| MIR196A1   | 0.8978 | 1.0749 | 1.0065 | 0.8417 | 0.9552 | 0.0525 |
| SLIT3      | 0.8978 | 1.0783 | 0.9278 | 0.9170 | 0.9552 | 0.0415 |
| ADCYAP1    | 0.9516 | 1.0489 | 1.0159 | 0.8047 | 0.9553 | 0.0541 |
| RNF166     | 0.9735 | 0.9724 | 1.0156 | 0.8595 | 0.9553 | 0.0335 |
| MIR497     | 0.9618 | 1.0728 | 0.9322 | 0.8543 | 0.9553 | 0.0453 |
| LIG4       | 0.9231 | 1.0512 | 0.9988 | 0.8480 | 0.9553 | 0.0444 |
| ZDHHC11    | 0.9220 | 1.1431 | 0.9150 | 0.8409 | 0.9553 | 0.0652 |
| TFIP11     | 0.7915 | 1.3737 | 0.9889 | 0.6669 | 0.9553 | 0.1544 |
| LOC731231  | 0.8500 | 1.1226 | 1.0004 | 0.8481 | 0.9553 | 0.0662 |
| LOC150051  | 0.8919 | 1.0348 | 1.0221 | 0.8723 | 0.9553 | 0.0425 |
| LOC440995  | 0.9331 | 0.9499 | 1.0268 | 0.9113 | 0.9553 | 0.0251 |
| CACNA1H    | 0.9713 | 1.1014 | 0.9105 | 0.8381 | 0.9553 | 0.0558 |
| LOC1001288 | 0.9559 | 1.0641 | 0.9579 | 0.8433 | 0.9553 | 0.0451 |
| BAI2       | 0.8314 | 1.0244 | 1.0408 | 0.9246 | 0.9553 | 0.0486 |
| LOC651140  | 0.7978 | 1.0916 | 1.0920 | 0.8398 | 0.9553 | 0.0793 |
| ESPNP      | 0.9108 | 0.9551 | 1.0096 | 0.9457 | 0.9553 | 0.0204 |
| NAT11      | 0.8555 | 1.1095 | 1.0096 | 0.8466 | 0.9553 | 0.0636 |
| LOC442726  | 0.9215 | 0.9435 | 1.0483 | 0.9080 | 0.9553 | 0.0318 |
| KRTAP22-1  | 0.8888 | 1.0242 | 0.9653 | 0.9430 | 0.9553 | 0.0280 |
| ZNF234     | 0.7863 | 1.1666 | 1.0035 | 0.8651 | 0.9553 | 0.0835 |
| DGKQ       | 0.7633 | 1.3125 | 0.9822 | 0.7634 | 0.9553 | 0.1297 |
| C10orf129  | 0.8856 | 1.1634 | 0.9435 | 0.8288 | 0.9553 | 0.0732 |
| NPR3       | 0.8168 | 1.0124 | 1.0559 | 0.9363 | 0.9553 | 0.0524 |
| WBSCR28    | 0.9504 | 0.9572 | 1.0295 | 0.8843 | 0.9554 | 0.0297 |
| OXCT2      | 0.8977 | 1.0011 | 0.9791 | 0.9436 | 0.9554 | 0.0226 |
| LOC652048  | 0.9464 | 1.0400 | 0.9222 | 0.9128 | 0.9554 | 0.0291 |
| LOC126767  | 0.8428 | 1.1497 | 1.0230 | 0.8060 | 0.9554 | 0.0803 |
| LOC1001339 | 0.8956 | 1.1093 | 0.9462 | 0.8703 | 0.9554 | 0.0537 |
| DNAH14     | 0.9434 | 0.9387 | 1.0712 | 0.8682 | 0.9554 | 0.0423 |
| TRIM14     | 0.9389 | 1.0393 | 0.9408 | 0.9026 | 0.9554 | 0.0293 |
| SNORA42    | 0.7997 | 1.0731 | 0.9704 | 0.9784 | 0.9554 | 0.0569 |
| ATP2A1     | 0.9193 | 1.0287 | 1.0065 | 0.8671 | 0.9554 | 0.0377 |
| PPIG       | 0.9108 | 1.1995 | 0.9173 | 0.7940 | 0.9554 | 0.0862 |
| MAGEB2     | 0.9258 | 1.0511 | 1.0351 | 0.8096 | 0.9554 | 0.0560 |

|            |        |        |        |        |        |        |
|------------|--------|--------|--------|--------|--------|--------|
| LOC1001332 | 0.8568 | 1.1163 | 0.9823 | 0.8662 | 0.9554 | 0.0608 |
| GTPBP10    | 0.9163 | 1.1484 | 1.0232 | 0.7338 | 0.9554 | 0.0878 |
| LIX1       | 0.9702 | 0.9433 | 1.0217 | 0.8865 | 0.9554 | 0.0281 |
| TTY6B      | 0.9769 | 0.9968 | 1.0133 | 0.8348 | 0.9554 | 0.0409 |
| C21orf2    | 0.9192 | 1.0847 | 0.9849 | 0.8330 | 0.9554 | 0.0531 |
| TTRAP      | 0.8848 | 1.0588 | 1.0136 | 0.8646 | 0.9554 | 0.0477 |
| LOC1001281 | 0.8992 | 1.0202 | 1.0359 | 0.8665 | 0.9554 | 0.0426 |
| LOC641697  | 0.8704 | 0.9277 | 1.0240 | 0.9997 | 0.9554 | 0.0349 |
| LOC652548  | 0.8979 | 1.0914 | 1.0175 | 0.8150 | 0.9554 | 0.0615 |
| LOC389842  | 0.9179 | 0.9596 | 1.0645 | 0.8798 | 0.9555 | 0.0398 |
| SAMD3      | 0.9160 | 1.0427 | 0.9615 | 0.9017 | 0.9555 | 0.0317 |
| MIR590     | 0.9496 | 0.9264 | 1.0118 | 0.9341 | 0.9555 | 0.0194 |
| SLC39A1    | 0.6647 | 1.5381 | 0.9087 | 0.7104 | 0.9555 | 0.2013 |
| GLIS2      | 1.0244 | 0.9385 | 0.9735 | 0.8855 | 0.9555 | 0.0292 |
| CRB1       | 0.9537 | 0.9503 | 1.0387 | 0.8791 | 0.9555 | 0.0326 |
| SNRPD1     | 0.7674 | 0.9998 | 1.2055 | 0.8493 | 0.9555 | 0.0962 |
| SLC25A2    | 0.8922 | 1.0179 | 1.0577 | 0.8542 | 0.9555 | 0.0488 |
| LOC642592  | 0.9773 | 0.8984 | 1.0444 | 0.9019 | 0.9555 | 0.0348 |
| ZNF34      | 0.8836 | 1.1099 | 0.9534 | 0.8752 | 0.9555 | 0.0544 |
| FFAR1      | 0.9073 | 1.1504 | 0.9339 | 0.8304 | 0.9555 | 0.0686 |
| SPRYD3     | 0.9257 | 1.2049 | 0.9446 | 0.7469 | 0.9555 | 0.0943 |
| CIR1       | 0.8171 | 1.0652 | 1.1697 | 0.7701 | 0.9555 | 0.0964 |
| ERC1       | 0.9378 | 1.1058 | 0.9937 | 0.7849 | 0.9555 | 0.0667 |
| OR1L3      | 0.9757 | 1.1153 | 0.8900 | 0.8412 | 0.9555 | 0.0601 |
| U58        | 0.8621 | 1.0738 | 0.9425 | 0.9437 | 0.9555 | 0.0438 |
| CLTC       | 0.8763 | 1.0879 | 1.0906 | 0.7674 | 0.9555 | 0.0803 |
| LOC441687  | 0.9195 | 1.0209 | 0.9494 | 0.9323 | 0.9555 | 0.0226 |
| NCRNA00160 | 0.8599 | 1.0664 | 1.0983 | 0.7975 | 0.9555 | 0.0746 |
| NUMBL      | 0.8352 | 1.1031 | 1.0654 | 0.8185 | 0.9556 | 0.0748 |
| GK2        | 0.8556 | 1.0290 | 0.9811 | 0.9565 | 0.9556 | 0.0366 |
| DEFB123    | 1.0100 | 1.0169 | 0.9559 | 0.8395 | 0.9556 | 0.0410 |
| LOC649618  | 0.9304 | 0.9614 | 0.9813 | 0.9492 | 0.9556 | 0.0107 |
| CEP290     | 0.9433 | 1.0485 | 0.9315 | 0.8990 | 0.9556 | 0.0324 |
| KCTD17     | 0.9311 | 1.0823 | 0.8755 | 0.9334 | 0.9556 | 0.0443 |
| LOC1001285 | 0.9106 | 1.0651 | 0.9875 | 0.8592 | 0.9556 | 0.0450 |
| EIF2AK3    | 0.9170 | 1.1183 | 0.9373 | 0.8497 | 0.9556 | 0.0574 |
| LOC202181  | 0.9518 | 1.0377 | 1.0178 | 0.8150 | 0.9556 | 0.0503 |
| MIR324     | 0.9669 | 0.9122 | 0.9479 | 0.9953 | 0.9556 | 0.0174 |
| C20orf46   | 0.9078 | 1.0020 | 0.9986 | 0.9140 | 0.9556 | 0.0259 |
| LOC644528  | 0.8022 | 1.1326 | 0.9829 | 0.9048 | 0.9556 | 0.0696 |
| RBBP6      | 0.9556 | 1.0812 | 0.9767 | 0.8089 | 0.9556 | 0.0561 |
| LOC1001330 | 1.0165 | 1.0196 | 0.8971 | 0.8892 | 0.9556 | 0.0361 |
| LOC727791  | 0.9226 | 1.1309 | 0.9321 | 0.8369 | 0.9556 | 0.0622 |
| PCDHGA11   | 0.9350 | 0.9943 | 0.9512 | 0.9421 | 0.9556 | 0.0133 |
| LOC401115  | 0.8236 | 1.1966 | 1.1180 | 0.6843 | 0.9556 | 0.1209 |
| SPINT2     | 0.7472 | 1.2537 | 1.0163 | 0.8054 | 0.9556 | 0.1149 |

|            |        |        |        |        |        |        |
|------------|--------|--------|--------|--------|--------|--------|
| MIR34A     | 0.8737 | 0.9804 | 1.0348 | 0.9336 | 0.9556 | 0.0342 |
| CNTNAP3B   | 0.8758 | 1.0643 | 1.0054 | 0.8770 | 0.9556 | 0.0473 |
| CCR9       | 0.9481 | 1.0387 | 0.9270 | 0.9087 | 0.9556 | 0.0288 |
| LOC401357  | 0.8582 | 1.0588 | 0.9834 | 0.9223 | 0.9556 | 0.0428 |
| LOC650612  | 0.8348 | 1.0328 | 1.0521 | 0.9029 | 0.9556 | 0.0522 |
| NR2E3      | 0.9646 | 1.0125 | 0.9233 | 0.9222 | 0.9557 | 0.0214 |
| LOC1001320 | 0.8973 | 1.0386 | 1.0185 | 0.8682 | 0.9557 | 0.0427 |
| LOC648684  | 0.9027 | 1.0717 | 1.0155 | 0.8328 | 0.9557 | 0.0540 |
| TMEM67     | 0.8323 | 1.1165 | 0.9736 | 0.9003 | 0.9557 | 0.0609 |
| FLJ44290   | 0.9672 | 0.9170 | 1.0798 | 0.8587 | 0.9557 | 0.0469 |
| CHADL      | 0.9207 | 1.0190 | 0.9482 | 0.9348 | 0.9557 | 0.0218 |
| LOC440829  | 0.9562 | 1.0876 | 0.9002 | 0.8788 | 0.9557 | 0.0469 |
| LCA5       | 0.7791 | 1.0551 | 1.0864 | 0.9022 | 0.9557 | 0.0713 |
| GZF1       | 0.9059 | 1.1306 | 0.9769 | 0.8095 | 0.9557 | 0.0676 |
| AP2A2      | 1.0227 | 1.1310 | 0.8063 | 0.8629 | 0.9557 | 0.0742 |
| LOC283953  | 0.8070 | 1.1065 | 1.0447 | 0.8647 | 0.9557 | 0.0713 |
| HLCS       | 0.8997 | 1.0791 | 1.0075 | 0.8366 | 0.9557 | 0.0542 |
| EMILIN1    | 0.9627 | 0.9871 | 0.9387 | 0.9345 | 0.9557 | 0.0121 |
| LOC641726  | 1.0001 | 1.0259 | 0.9675 | 0.8294 | 0.9557 | 0.0438 |
| LOC283767  | 0.9174 | 1.0724 | 0.9446 | 0.8885 | 0.9557 | 0.0405 |
| LOC729966  | 0.9242 | 1.0195 | 0.9630 | 0.9162 | 0.9557 | 0.0236 |
| LOC641938  | 0.8259 | 1.0579 | 1.0325 | 0.9066 | 0.9558 | 0.0545 |
| APLP2      | 0.9431 | 1.1950 | 0.8969 | 0.7880 | 0.9558 | 0.0861 |
| LOC730344  | 0.9518 | 1.0126 | 0.9316 | 0.9271 | 0.9558 | 0.0197 |
| USH3A      | 0.9767 | 0.9821 | 0.9536 | 0.9107 | 0.9558 | 0.0162 |
| NLRP3      | 0.8736 | 1.0119 | 1.0724 | 0.8653 | 0.9558 | 0.0514 |
| MIR106B    | 0.8007 | 1.0430 | 1.0508 | 0.9286 | 0.9558 | 0.0588 |
| SNORA2B    | 0.8639 | 0.9895 | 1.0263 | 0.9434 | 0.9558 | 0.0350 |
| GPR84      | 0.8682 | 0.9953 | 0.9989 | 0.9607 | 0.9558 | 0.0305 |
| LOC1001333 | 0.7556 | 1.2660 | 1.0823 | 0.7193 | 0.9558 | 0.1317 |
| LOC1001340 | 0.8114 | 1.0637 | 1.0894 | 0.8588 | 0.9558 | 0.0706 |
| CEND1      | 0.7467 | 1.1531 | 1.0011 | 0.9223 | 0.9558 | 0.0846 |
| LOC653472  | 0.8938 | 1.0455 | 1.0338 | 0.8501 | 0.9558 | 0.0493 |
| MIR569     | 0.9656 | 0.9989 | 1.0235 | 0.8352 | 0.9558 | 0.0419 |
| CRELD2     | 0.8260 | 1.3157 | 0.9238 | 0.7578 | 0.9558 | 0.1247 |
| LOC1001297 | 0.9695 | 1.1239 | 0.9333 | 0.7964 | 0.9558 | 0.0673 |
| RAD1       | 0.8309 | 1.0608 | 1.0681 | 0.8634 | 0.9558 | 0.0631 |
| MIR139     | 0.8435 | 1.0387 | 1.0863 | 0.8548 | 0.9558 | 0.0624 |
| LOC415056  | 0.8452 | 1.0699 | 1.0410 | 0.8672 | 0.9558 | 0.0580 |
| AADAACL1   | 0.7849 | 1.2679 | 1.0146 | 0.7559 | 0.9558 | 0.1190 |
| LOC646869  | 0.9593 | 0.9292 | 1.0460 | 0.8888 | 0.9558 | 0.0334 |
| HTR2A      | 0.9645 | 1.0681 | 0.8779 | 0.9128 | 0.9558 | 0.0414 |
| LOC642621  | 0.9306 | 1.0094 | 1.0689 | 0.8145 | 0.9558 | 0.0550 |
| C9orf79    | 0.8807 | 1.1438 | 0.9439 | 0.8549 | 0.9558 | 0.0654 |
| LOC644916  | 0.8246 | 1.0327 | 0.9893 | 0.9767 | 0.9558 | 0.0454 |
| SSX4       | 0.8945 | 1.0957 | 0.9393 | 0.8939 | 0.9558 | 0.0478 |

|            |        |        |        |        |        |        |
|------------|--------|--------|--------|--------|--------|--------|
| UFM1       | 0.9021 | 1.1781 | 0.9941 | 0.7491 | 0.9558 | 0.0897 |
| ZNF492     | 0.9362 | 1.0213 | 0.9334 | 0.9325 | 0.9558 | 0.0218 |
| LOC283824  | 0.9229 | 1.1015 | 0.9957 | 0.8033 | 0.9559 | 0.0627 |
| SFTPA1B    | 0.8686 | 1.0824 | 0.9666 | 0.9058 | 0.9559 | 0.0468 |
| C19orf45   | 0.8423 | 1.1824 | 0.8738 | 0.9250 | 0.9559 | 0.0774 |
| INVS       | 0.9377 | 1.0980 | 0.9591 | 0.8287 | 0.9559 | 0.0553 |
| FLJ25037   | 1.0231 | 1.0349 | 0.9697 | 0.7957 | 0.9559 | 0.0552 |
| PTP4A3     | 0.9145 | 1.0754 | 1.0199 | 0.8137 | 0.9559 | 0.0580 |
| LOC652790  | 0.9608 | 1.0602 | 0.9573 | 0.8452 | 0.9559 | 0.0439 |
| LTK        | 0.9077 | 1.0152 | 1.0085 | 0.8921 | 0.9559 | 0.0325 |
| FLJ45455   | 0.9324 | 1.0615 | 0.9117 | 0.9179 | 0.9559 | 0.0355 |
| ZCCHC12    | 0.9302 | 1.0814 | 1.0623 | 0.7497 | 0.9559 | 0.0765 |
| LOC642548  | 0.7846 | 1.2709 | 0.9182 | 0.8499 | 0.9559 | 0.1085 |
| NEU1       | 1.0551 | 1.2441 | 0.8463 | 0.6782 | 0.9559 | 0.1232 |
| LOC730051  | 0.7754 | 1.2114 | 1.0061 | 0.8308 | 0.9559 | 0.0983 |
| LOC730173  | 0.8525 | 1.2277 | 0.9095 | 0.8339 | 0.9559 | 0.0920 |
| KIAA0492   | 0.9594 | 0.9866 | 1.0050 | 0.8728 | 0.9559 | 0.0292 |
| LOC653198  | 0.8251 | 0.9795 | 1.0985 | 0.9207 | 0.9559 | 0.0572 |
| LOC1001325 | 0.7948 | 1.1479 | 0.9819 | 0.8992 | 0.9559 | 0.0746 |
| ADHFE1     | 0.9737 | 1.0380 | 0.9537 | 0.8584 | 0.9559 | 0.0371 |
| NPBWR1     | 0.8408 | 1.0802 | 0.9646 | 0.9382 | 0.9559 | 0.0492 |
| TTY1       | 0.9310 | 1.1474 | 0.9725 | 0.7730 | 0.9560 | 0.0769 |
| LOC1001283 | 0.9770 | 1.0322 | 0.9887 | 0.8259 | 0.9560 | 0.0449 |
| FRMD1      | 0.8867 | 1.0533 | 0.9577 | 0.9262 | 0.9560 | 0.0355 |
| LOC402198  | 0.9478 | 1.0231 | 0.9167 | 0.9363 | 0.9560 | 0.0233 |
| NR4A3      | 0.9266 | 1.0535 | 0.9628 | 0.8810 | 0.9560 | 0.0366 |
| BPI        | 1.0051 | 1.0389 | 0.9550 | 0.8250 | 0.9560 | 0.0470 |
| LOC1001335 | 0.8110 | 1.1336 | 1.0115 | 0.8678 | 0.9560 | 0.0727 |
| CCL22      | 0.9346 | 0.9808 | 1.0026 | 0.9061 | 0.9560 | 0.0219 |
| LOC401677  | 1.0484 | 1.0730 | 0.9574 | 0.7452 | 0.9560 | 0.0745 |
| LOC389791  | 0.8514 | 1.0016 | 0.9890 | 0.9820 | 0.9560 | 0.0351 |
| TTY2       | 0.8822 | 1.0877 | 0.9322 | 0.9220 | 0.9560 | 0.0452 |
| ST8SIA6    | 0.9083 | 0.9742 | 1.0277 | 0.9138 | 0.9560 | 0.0282 |
| PHKG1      | 0.9038 | 1.0581 | 0.9789 | 0.8833 | 0.9560 | 0.0397 |
| LOC390378  | 0.8167 | 1.0606 | 1.0543 | 0.8925 | 0.9560 | 0.0606 |
| LOC647965  | 0.9333 | 1.0028 | 1.0484 | 0.8398 | 0.9561 | 0.0454 |
| LOC652292  | 1.0289 | 1.0239 | 0.9085 | 0.8629 | 0.9561 | 0.0417 |
| LOC1001324 | 0.9144 | 1.0691 | 0.9552 | 0.8855 | 0.9561 | 0.0403 |
| LOC646691  | 0.9661 | 1.0269 | 0.9562 | 0.8750 | 0.9561 | 0.0312 |
| PPM1J      | 0.8255 | 1.0866 | 0.9926 | 0.9197 | 0.9561 | 0.0553 |
| LOC200261  | 0.9289 | 0.9952 | 1.0606 | 0.8396 | 0.9561 | 0.0472 |
| LOC1001341 | 0.9752 | 0.9796 | 1.0146 | 0.8550 | 0.9561 | 0.0348 |
| LOC1001320 | 0.8668 | 1.0296 | 0.9588 | 0.9692 | 0.9561 | 0.0336 |
| C21orf123  | 0.8957 | 1.0561 | 0.9405 | 0.9321 | 0.9561 | 0.0347 |
| TRDN       | 0.8732 | 1.0819 | 0.9419 | 0.9275 | 0.9561 | 0.0445 |
| FLJ22531   | 0.8985 | 1.0657 | 0.9884 | 0.8719 | 0.9561 | 0.0442 |

|            |        |        |        |        |        |        |
|------------|--------|--------|--------|--------|--------|--------|
| LOC653801  | 0.8849 | 1.0497 | 0.9786 | 0.9112 | 0.9561 | 0.0369 |
| LY75       | 0.8625 | 1.1270 | 0.9228 | 0.9122 | 0.9561 | 0.0585 |
| LOC1001283 | 0.9511 | 1.0312 | 1.0720 | 0.7701 | 0.9561 | 0.0669 |
| CLK4       | 0.9571 | 1.1477 | 0.9783 | 0.7413 | 0.9561 | 0.0833 |
| RHOJ       | 0.9368 | 1.0250 | 0.9637 | 0.8991 | 0.9561 | 0.0265 |
| LOC1001279 | 0.8312 | 1.1353 | 0.9615 | 0.8965 | 0.9561 | 0.0654 |
| LOC649128  | 0.9116 | 1.1260 | 0.9277 | 0.8592 | 0.9561 | 0.0585 |
| FAM75A7    | 0.8817 | 1.0215 | 1.0165 | 0.9048 | 0.9561 | 0.0366 |
| LOC1001337 | 0.7859 | 1.1696 | 0.9666 | 0.9025 | 0.9561 | 0.0804 |
| MGC25181   | 0.8808 | 1.0534 | 0.9729 | 0.9174 | 0.9561 | 0.0376 |
| ZNF536     | 0.9256 | 0.9647 | 1.0224 | 0.9119 | 0.9561 | 0.0248 |
| LOC653855  | 0.9522 | 1.1406 | 0.8871 | 0.8447 | 0.9561 | 0.0654 |
| C19orf31   | 0.8280 | 1.3820 | 0.8691 | 0.7455 | 0.9562 | 0.1443 |
| LOC1001279 | 0.8576 | 1.0080 | 0.9355 | 1.0235 | 0.9562 | 0.0380 |
| ACTL7B     | 0.8675 | 1.0971 | 0.8520 | 1.0081 | 0.9562 | 0.0587 |
| LOC1001296 | 0.8820 | 1.0508 | 1.0559 | 0.8360 | 0.9562 | 0.0569 |
| LOC1001341 | 0.8293 | 1.1141 | 0.9462 | 0.9351 | 0.9562 | 0.0589 |
| FLJ42177   | 0.8843 | 1.1143 | 0.9468 | 0.8792 | 0.9562 | 0.0549 |
| NCRNA00051 | 0.8947 | 1.0441 | 0.9621 | 0.9239 | 0.9562 | 0.0324 |
| LOC1001301 | 0.9115 | 1.0787 | 0.9439 | 0.8906 | 0.9562 | 0.0423 |
| LOC653981  | 0.8876 | 1.1888 | 0.9221 | 0.8263 | 0.9562 | 0.0800 |
| LOC402457  | 0.8017 | 1.0522 | 1.0693 | 0.9015 | 0.9562 | 0.0638 |
| LOC285033  | 0.8979 | 1.0537 | 0.9210 | 0.9523 | 0.9562 | 0.0344 |
| LOC643145  | 0.9632 | 1.0434 | 0.9575 | 0.8607 | 0.9562 | 0.0374 |
| MORN5      | 0.8989 | 1.0083 | 1.0702 | 0.8475 | 0.9562 | 0.0507 |
| SNORD18B   | 0.8569 | 1.0998 | 0.9549 | 0.9132 | 0.9562 | 0.0519 |
| LOC647810  | 0.9445 | 1.0528 | 0.9619 | 0.8656 | 0.9562 | 0.0384 |
| CELA2B     | 0.8552 | 1.1768 | 0.8997 | 0.8932 | 0.9562 | 0.0742 |
| LOC653706  | 0.8948 | 1.1209 | 0.9427 | 0.8666 | 0.9562 | 0.0571 |
| ARMC8      | 0.8713 | 1.1452 | 0.9723 | 0.8362 | 0.9562 | 0.0693 |
| LOC653203  | 0.9130 | 1.0085 | 0.9729 | 0.9306 | 0.9563 | 0.0215 |
| LOC644931  | 1.0710 | 1.3133 | 0.7082 | 0.7325 | 0.9563 | 0.1450 |
| FLJ21767   | 0.8989 | 1.0304 | 1.0029 | 0.8928 | 0.9563 | 0.0353 |
| LOC649107  | 0.9427 | 1.0261 | 1.0182 | 0.8380 | 0.9563 | 0.0437 |
| ARL6       | 0.9209 | 1.0588 | 0.9754 | 0.8699 | 0.9563 | 0.0404 |
| RTF1       | 0.9343 | 1.0388 | 0.9938 | 0.8583 | 0.9563 | 0.0391 |
| KLK6       | 0.9110 | 1.0381 | 1.0227 | 0.8533 | 0.9563 | 0.0445 |
| GPX2       | 0.8119 | 1.1363 | 1.0381 | 0.8388 | 0.9563 | 0.0784 |
| LOC648253  | 0.9775 | 1.0291 | 0.9601 | 0.8584 | 0.9563 | 0.0358 |
| UBXN10     | 0.8695 | 1.0863 | 0.9446 | 0.9247 | 0.9563 | 0.0462 |
| SYNPO2L    | 0.9807 | 0.9498 | 0.9980 | 0.8967 | 0.9563 | 0.0222 |
| LOC338579  | 0.8246 | 1.0445 | 1.0583 | 0.8979 | 0.9563 | 0.0570 |
| PITPNA     | 0.8463 | 1.2530 | 1.0282 | 0.6976 | 0.9563 | 0.1198 |
| ATP13A2    | 0.9334 | 1.1810 | 0.8504 | 0.8604 | 0.9563 | 0.0771 |
| C3orf63    | 0.8559 | 1.1234 | 0.8642 | 0.9818 | 0.9563 | 0.0627 |
| LOC650030  | 0.8894 | 1.0982 | 0.9441 | 0.8937 | 0.9563 | 0.0489 |

|            |        |        |        |        |        |        |
|------------|--------|--------|--------|--------|--------|--------|
| BACH1      | 0.8370 | 1.1204 | 1.0032 | 0.8646 | 0.9563 | 0.0657 |
| PACSIN2    | 0.9299 | 1.2956 | 0.8838 | 0.7160 | 0.9563 | 0.1221 |
| LOC652765  | 0.8678 | 1.1224 | 0.9222 | 0.9129 | 0.9563 | 0.0566 |
| OR13H1     | 0.9354 | 1.0131 | 0.9845 | 0.8925 | 0.9564 | 0.0267 |
| CRISP3     | 0.8987 | 0.9679 | 0.9436 | 1.0152 | 0.9564 | 0.0243 |
| LOC388915  | 0.9088 | 1.0756 | 0.9285 | 0.9125 | 0.9564 | 0.0400 |
| LOC23117   | 0.8523 | 1.3482 | 0.8034 | 0.8215 | 0.9564 | 0.1310 |
| IL15       | 0.8378 | 1.0829 | 1.0114 | 0.8934 | 0.9564 | 0.0556 |
| OMG        | 0.8636 | 1.0439 | 1.0759 | 0.8421 | 0.9564 | 0.0603 |
| LOC643093  | 0.9083 | 1.0458 | 1.0178 | 0.8536 | 0.9564 | 0.0453 |
| SUSD4      | 0.9468 | 1.1048 | 0.9904 | 0.7835 | 0.9564 | 0.0666 |
| CRYBB2     | 0.9009 | 1.0393 | 1.0087 | 0.8766 | 0.9564 | 0.0398 |
| FLJ35379   | 0.8942 | 0.9745 | 1.0290 | 0.9279 | 0.9564 | 0.0293 |
| LOC648699  | 0.8009 | 1.0964 | 1.0848 | 0.8434 | 0.9564 | 0.0780 |
| LOC647191  | 0.9182 | 0.9686 | 1.0733 | 0.8655 | 0.9564 | 0.0443 |
| LOC729595  | 0.9195 | 1.0232 | 0.9429 | 0.9399 | 0.9564 | 0.0229 |
| LOC643100  | 0.9307 | 0.8821 | 0.9756 | 1.0372 | 0.9564 | 0.0330 |
| LOC1001279 | 0.9114 | 1.0414 | 0.9164 | 0.9565 | 0.9564 | 0.0301 |
| ATP6AP1    | 0.7791 | 1.3179 | 0.9955 | 0.7332 | 0.9564 | 0.1334 |
| LOC284297  | 0.8531 | 1.0985 | 0.9892 | 0.8849 | 0.9564 | 0.0556 |
| TNN        | 0.9623 | 0.9976 | 0.9761 | 0.8897 | 0.9564 | 0.0234 |
| ZNF526     | 0.9385 | 1.1038 | 0.9754 | 0.8082 | 0.9564 | 0.0608 |
| LOC641806  | 0.9490 | 1.0285 | 0.9881 | 0.8602 | 0.9564 | 0.0359 |
| RASGRF1    | 0.9326 | 1.0231 | 1.0472 | 0.8229 | 0.9564 | 0.0509 |
| LOC401533  | 0.8695 | 0.9645 | 1.0704 | 0.9213 | 0.9564 | 0.0427 |
| BTBD17     | 0.9236 | 0.9983 | 1.0072 | 0.8967 | 0.9564 | 0.0273 |
| MIR493     | 0.8848 | 1.0081 | 1.0766 | 0.8563 | 0.9565 | 0.0518 |
| SLCO6A1    | 0.8973 | 0.9988 | 1.0565 | 0.8732 | 0.9565 | 0.0430 |
| CREB5      | 0.8941 | 1.1236 | 0.9275 | 0.8807 | 0.9565 | 0.0566 |
| LYPD4      | 0.7731 | 1.0295 | 1.0817 | 0.9416 | 0.9565 | 0.0676 |
| OR8H3      | 0.9024 | 1.0670 | 0.9549 | 0.9016 | 0.9565 | 0.0389 |
| LOC652209  | 0.9465 | 1.0803 | 0.9640 | 0.8351 | 0.9565 | 0.0502 |
| FCN3       | 0.9572 | 1.0707 | 0.9317 | 0.8663 | 0.9565 | 0.0426 |
| LOC645391  | 0.8247 | 1.0646 | 1.0231 | 0.9135 | 0.9565 | 0.0543 |
| HSD3B2     | 0.8619 | 1.1174 | 0.9739 | 0.8727 | 0.9565 | 0.0593 |
| LOC1001291 | 0.7860 | 0.9677 | 1.1355 | 0.9367 | 0.9565 | 0.0717 |
| STAG3      | 0.8478 | 1.1058 | 1.0153 | 0.8570 | 0.9565 | 0.0629 |
| LOC727778  | 0.8881 | 0.9309 | 1.1459 | 0.8611 | 0.9565 | 0.0648 |
| LOC652860  | 0.8548 | 1.0771 | 0.9939 | 0.9002 | 0.9565 | 0.0495 |
| MIR548I4   | 0.9798 | 1.0157 | 0.9635 | 0.8669 | 0.9565 | 0.0318 |
| LOC400221  | 0.9950 | 1.0164 | 0.9509 | 0.8638 | 0.9565 | 0.0338 |
| HELZ       | 0.8963 | 1.2783 | 0.8650 | 0.7864 | 0.9565 | 0.1097 |
| LOC494141  | 0.8263 | 1.0763 | 1.0819 | 0.8415 | 0.9565 | 0.0709 |
| LOC653800  | 0.8908 | 0.9514 | 1.0914 | 0.8925 | 0.9565 | 0.0471 |
| IL32       | 0.8370 | 1.0931 | 1.0189 | 0.8770 | 0.9565 | 0.0599 |
| LOC1001310 | 0.9264 | 1.0214 | 0.9703 | 0.9080 | 0.9565 | 0.0253 |



|            |        |        |        |        |        |        |
|------------|--------|--------|--------|--------|--------|--------|
| LAMB3      | 0.9422 | 1.0224 | 0.9944 | 0.8671 | 0.9565 | 0.0341 |
| LOC1001311 | 0.9093 | 1.0457 | 0.9601 | 0.9110 | 0.9565 | 0.0320 |
| LOC644782  | 0.9330 | 0.9998 | 1.0310 | 0.8623 | 0.9565 | 0.0375 |
| KRT25      | 0.9987 | 0.9464 | 1.0198 | 0.8614 | 0.9565 | 0.0353 |
| EIF3IP1    | 0.9605 | 1.0141 | 1.0091 | 0.8425 | 0.9565 | 0.0399 |
| MIR519E    | 0.9785 | 0.9515 | 0.9571 | 0.9391 | 0.9565 | 0.0082 |
| ZDHHC21    | 0.8849 | 1.0268 | 1.1418 | 0.7727 | 0.9565 | 0.0807 |
| HIST1H2AK  | 0.9529 | 1.1241 | 0.9412 | 0.8080 | 0.9566 | 0.0648 |
| LOC646160  | 0.9533 | 1.0213 | 1.0947 | 0.7570 | 0.9566 | 0.0725 |
| LOC1001308 | 0.9724 | 1.0207 | 0.9931 | 0.8401 | 0.9566 | 0.0401 |
| LOC731042  | 0.9664 | 1.0523 | 1.0027 | 0.8049 | 0.9566 | 0.0535 |
| PSMA4      | 0.7334 | 1.5073 | 0.9897 | 0.5959 | 0.9566 | 0.2009 |
| LOC643325  | 0.9983 | 0.9947 | 0.9614 | 0.8719 | 0.9566 | 0.0294 |
| LOC729327  | 0.8810 | 0.9954 | 1.0348 | 0.9152 | 0.9566 | 0.0354 |
| LOC728895  | 0.9096 | 0.9708 | 1.0053 | 0.9406 | 0.9566 | 0.0205 |
| COX8C      | 0.9875 | 0.9930 | 0.9054 | 0.9405 | 0.9566 | 0.0207 |
| GFRA4      | 0.9463 | 0.9892 | 1.0063 | 0.8846 | 0.9566 | 0.0271 |
| LOC651914  | 0.8802 | 0.9669 | 0.9777 | 1.0016 | 0.9566 | 0.0265 |
| LOC649317  | 0.8423 | 0.9904 | 1.0594 | 0.9344 | 0.9566 | 0.0459 |
| S1PR4      | 0.9733 | 0.9990 | 1.0416 | 0.8126 | 0.9566 | 0.0500 |
| ANKK1      | 0.9040 | 1.0850 | 0.9613 | 0.8762 | 0.9566 | 0.0463 |
| RTTN       | 0.7993 | 1.1614 | 1.0958 | 0.7699 | 0.9566 | 0.1004 |
| LOC654260  | 0.9215 | 1.0283 | 0.9776 | 0.8990 | 0.9566 | 0.0290 |
| LOC1001287 | 0.8568 | 1.0659 | 0.9848 | 0.9189 | 0.9566 | 0.0448 |
| LOC652742  | 0.9443 | 1.0174 | 1.0120 | 0.8528 | 0.9566 | 0.0384 |
| POTEE      | 0.7689 | 1.1871 | 1.1006 | 0.7700 | 0.9566 | 0.1095 |
| SNORD114-2 | 0.8468 | 1.0921 | 0.9344 | 0.9533 | 0.9566 | 0.0508 |
| GRAP2      | 0.9407 | 0.9853 | 0.9342 | 0.9664 | 0.9566 | 0.0118 |
| LOC652582  | 0.8816 | 0.9872 | 0.9879 | 0.9700 | 0.9567 | 0.0254 |
| LOC649212  | 0.9234 | 0.9655 | 1.0415 | 0.8963 | 0.9567 | 0.0317 |
| LOC644978  | 0.7685 | 1.1695 | 0.9725 | 0.9162 | 0.9567 | 0.0830 |
| MORF4      | 0.8534 | 1.1007 | 1.0236 | 0.8491 | 0.9567 | 0.0629 |
| LOC645785  | 0.9128 | 1.0928 | 1.0399 | 0.7812 | 0.9567 | 0.0696 |
| LOC391764  | 0.8741 | 1.0480 | 0.9349 | 0.9697 | 0.9567 | 0.0363 |
| UNK        | 1.1008 | 0.9353 | 0.8785 | 0.9121 | 0.9567 | 0.0494 |
| MIR302F    | 0.9037 | 0.9605 | 1.0245 | 0.9380 | 0.9567 | 0.0254 |
| ITPRIPL2   | 0.8920 | 1.0041 | 0.9482 | 0.9824 | 0.9567 | 0.0244 |
| LOC652680  | 0.9994 | 1.0190 | 0.8845 | 0.9238 | 0.9567 | 0.0316 |
| TTC39B     | 0.9040 | 1.0929 | 0.9294 | 0.9004 | 0.9567 | 0.0459 |
| LOC441920  | 0.9031 | 1.0923 | 1.0097 | 0.8217 | 0.9567 | 0.0594 |
| POR        | 0.9082 | 1.1881 | 0.9496 | 0.7809 | 0.9567 | 0.0851 |
| PP14571    | 0.7630 | 1.1785 | 0.8857 | 0.9996 | 0.9567 | 0.0883 |
| TGFB1      | 0.9628 | 0.8945 | 1.0466 | 0.9229 | 0.9567 | 0.0331 |
| LOC649613  | 0.9090 | 1.1287 | 0.8371 | 0.9520 | 0.9567 | 0.0620 |
| LOC1001330 | 0.9569 | 0.9784 | 1.0375 | 0.8540 | 0.9567 | 0.0382 |
| OR111      | 0.8462 | 1.0571 | 1.0102 | 0.9133 | 0.9567 | 0.0475 |

|            |        |        |        |        |        |        |
|------------|--------|--------|--------|--------|--------|--------|
| LOC729021  | 0.8873 | 1.0060 | 0.9915 | 0.9420 | 0.9567 | 0.0269 |
| CPSF4L     | 0.8546 | 1.0986 | 1.0102 | 0.8634 | 0.9567 | 0.0593 |
| ERCC-00108 | 0.8620 | 1.0529 | 0.9855 | 0.9265 | 0.9567 | 0.0408 |
| LOC643009  | 1.0361 | 0.8547 | 1.0729 | 0.8631 | 0.9567 | 0.0570 |
| PPP2R2B    | 0.8930 | 1.1226 | 1.0013 | 0.8099 | 0.9567 | 0.0678 |
| LRRN3      | 0.9312 | 1.0451 | 1.0141 | 0.8365 | 0.9567 | 0.0467 |
| GAB2       | 0.9215 | 0.9936 | 1.0140 | 0.8979 | 0.9567 | 0.0279 |
| LOC730387  | 0.8339 | 1.0847 | 0.9732 | 0.9351 | 0.9567 | 0.0518 |
| KSR2       | 0.9164 | 1.0485 | 1.0010 | 0.8610 | 0.9567 | 0.0420 |
| LOC388965  | 0.8603 | 1.0629 | 1.0037 | 0.9000 | 0.9567 | 0.0465 |
| MIR657     | 0.7816 | 1.0503 | 0.9971 | 0.9979 | 0.9567 | 0.0597 |
| CNKSR2     | 0.9432 | 1.0934 | 0.9090 | 0.8813 | 0.9567 | 0.0473 |
| MIR302E    | 0.9489 | 1.0805 | 0.9587 | 0.8389 | 0.9567 | 0.0494 |
| ING1       | 0.9246 | 1.0195 | 1.0068 | 0.8761 | 0.9567 | 0.0341 |
| LOC643878  | 0.7050 | 1.0522 | 1.0753 | 0.9945 | 0.9567 | 0.0856 |
| LOC390735  | 0.9211 | 1.0523 | 1.0835 | 0.7701 | 0.9567 | 0.0715 |
| LOC390345  | 0.6732 | 1.2856 | 1.2031 | 0.6651 | 0.9567 | 0.1669 |
| LOC649946  | 0.7666 | 1.1335 | 1.2965 | 0.6304 | 0.9568 | 0.1553 |
| FAM22C     | 1.0038 | 0.9417 | 0.9597 | 0.9219 | 0.9568 | 0.0175 |
| CHAT       | 0.9830 | 1.0250 | 0.9311 | 0.8879 | 0.9568 | 0.0299 |
| LOC440570  | 0.9932 | 1.0387 | 0.9181 | 0.8770 | 0.9568 | 0.0364 |
| LOC729399  | 0.8924 | 1.1041 | 0.9077 | 0.9228 | 0.9568 | 0.0495 |
| LOC729832  | 0.9741 | 1.0554 | 1.0004 | 0.7972 | 0.9568 | 0.0558 |
| WEE2       | 0.7957 | 1.1277 | 1.0224 | 0.8813 | 0.9568 | 0.0737 |
| S100A2     | 1.0408 | 0.9827 | 0.8941 | 0.9095 | 0.9568 | 0.0340 |
| LOC375748  | 0.9289 | 1.0151 | 1.0416 | 0.8414 | 0.9568 | 0.0454 |
| LYPD5      | 0.9238 | 1.0542 | 0.9769 | 0.8723 | 0.9568 | 0.0389 |
| NUPL1      | 0.8606 | 1.0818 | 0.9283 | 0.9564 | 0.9568 | 0.0463 |
| MIR874     | 0.9746 | 1.0223 | 0.9599 | 0.8703 | 0.9568 | 0.0318 |
| RGL4       | 0.8544 | 1.0262 | 1.0447 | 0.9018 | 0.9568 | 0.0466 |
| LOC653114  | 0.9657 | 1.0438 | 0.9630 | 0.8547 | 0.9568 | 0.0389 |
| GOLGA8G    | 0.9357 | 1.0464 | 0.9961 | 0.8490 | 0.9568 | 0.0425 |
| LOC648752  | 0.8345 | 0.9782 | 1.0934 | 0.9212 | 0.9568 | 0.0543 |
| AKAP14     | 0.9279 | 1.0744 | 0.9258 | 0.8992 | 0.9568 | 0.0397 |
| LOC729792  | 0.8944 | 0.9820 | 0.9697 | 0.9813 | 0.9568 | 0.0210 |
| LOC654113  | 0.8856 | 1.0173 | 1.0299 | 0.8945 | 0.9568 | 0.0387 |
| LVRN       | 0.8540 | 1.0028 | 1.0093 | 0.9612 | 0.9568 | 0.0359 |
| APOBEC4    | 0.9014 | 0.9813 | 1.1006 | 0.8441 | 0.9568 | 0.0556 |
| LOC728823  | 0.8068 | 1.0510 | 1.3517 | 0.6178 | 0.9568 | 0.1587 |
| LOC1001324 | 0.9511 | 1.0409 | 0.9839 | 0.8515 | 0.9568 | 0.0397 |
| ZNF587     | 0.9248 | 0.9858 | 1.0142 | 0.9026 | 0.9568 | 0.0260 |
| SEC24A     | 0.8852 | 1.0639 | 1.0264 | 0.8519 | 0.9568 | 0.0520 |
| PRKCB1     | 0.9674 | 0.9937 | 1.0159 | 0.8504 | 0.9568 | 0.0368 |
| C7orf11    | 0.7892 | 1.3759 | 0.8745 | 0.7879 | 0.9568 | 0.1411 |
| C4orf38    | 0.9566 | 1.0980 | 0.9187 | 0.8541 | 0.9569 | 0.0516 |
| NCRNA00095 | 0.9057 | 0.9684 | 0.9836 | 0.9697 | 0.9569 | 0.0174 |

|            |        |        |        |        |        |        |
|------------|--------|--------|--------|--------|--------|--------|
| RNF151     | 0.8680 | 1.0491 | 1.0174 | 0.8930 | 0.9569 | 0.0449 |
| MGC13098   | 0.9444 | 1.0245 | 0.9406 | 0.9180 | 0.9569 | 0.0233 |
| LOC649975  | 0.8458 | 0.9726 | 1.1046 | 0.9043 | 0.9569 | 0.0557 |
| FBXO39     | 0.9407 | 1.0478 | 0.8832 | 0.9558 | 0.9569 | 0.0341 |
| LOC652392  | 1.0032 | 1.0344 | 0.9970 | 0.7929 | 0.9569 | 0.0553 |
| PDE1A      | 0.8832 | 1.0221 | 1.0121 | 0.9101 | 0.9569 | 0.0353 |
| UBE2B      | 0.9015 | 1.0938 | 0.9550 | 0.8771 | 0.9569 | 0.0485 |
| LOC642930  | 0.8978 | 1.0131 | 0.9420 | 0.9745 | 0.9569 | 0.0245 |
| RELT       | 0.9172 | 1.1005 | 0.9318 | 0.8780 | 0.9569 | 0.0492 |
| ADAM21     | 0.9148 | 1.0243 | 0.9093 | 0.9792 | 0.9569 | 0.0275 |
| PCOLCE2    | 0.8835 | 1.0231 | 0.9637 | 0.9572 | 0.9569 | 0.0286 |
| OGN        | 0.9068 | 1.0684 | 1.0173 | 0.8351 | 0.9569 | 0.0528 |
| TRIM55     | 0.9286 | 1.0285 | 0.9429 | 0.9275 | 0.9569 | 0.0241 |
| TOX2       | 0.9251 | 1.1220 | 0.9151 | 0.8654 | 0.9569 | 0.0566 |
| SYT1       | 0.9539 | 0.9750 | 0.8951 | 1.0037 | 0.9569 | 0.0230 |
| IKBKAP     | 0.8915 | 1.0183 | 1.0098 | 0.9080 | 0.9569 | 0.0332 |
| MTFMT      | 0.7613 | 1.2747 | 1.0619 | 0.7297 | 0.9569 | 0.1297 |
| CNGA3      | 0.9314 | 1.0352 | 0.9920 | 0.8691 | 0.9569 | 0.0362 |
| LOC644865  | 0.9915 | 0.9678 | 0.9983 | 0.8699 | 0.9569 | 0.0297 |
| CTGLF5     | 0.8357 | 1.0338 | 1.0651 | 0.8930 | 0.9569 | 0.0551 |
| LGI4       | 0.9040 | 1.0736 | 0.9024 | 0.9477 | 0.9569 | 0.0403 |
| LOC642726  | 0.8910 | 1.1424 | 0.9455 | 0.8489 | 0.9569 | 0.0649 |
| SPRR1B     | 0.8171 | 1.1525 | 0.8794 | 0.9787 | 0.9569 | 0.0732 |
| LOC645079  | 0.8894 | 1.1175 | 0.8439 | 0.9770 | 0.9569 | 0.0602 |
| LOH12CR1   | 0.8705 | 1.0566 | 1.0276 | 0.8730 | 0.9569 | 0.0495 |
| JMJD1C     | 0.8816 | 1.2380 | 0.9592 | 0.7489 | 0.9569 | 0.1033 |
| LOC730100  | 0.9194 | 0.9931 | 1.0803 | 0.8351 | 0.9570 | 0.0523 |
| C3orf10    | 0.9213 | 1.4789 | 0.8515 | 0.5760 | 0.9570 | 0.1893 |
| C1orf215   | 0.8617 | 1.0243 | 1.0534 | 0.8885 | 0.9570 | 0.0479 |
| C1orf186   | 0.9387 | 1.0185 | 0.9979 | 0.8728 | 0.9570 | 0.0328 |
| LOC642121  | 0.9535 | 0.9742 | 1.0557 | 0.8445 | 0.9570 | 0.0435 |
| OFCC1      | 0.8793 | 1.0894 | 1.0313 | 0.8279 | 0.9570 | 0.0617 |
| LOC643955  | 0.8570 | 1.0549 | 1.0212 | 0.8948 | 0.9570 | 0.0479 |
| LOC641841  | 0.8393 | 1.1359 | 0.9091 | 0.9436 | 0.9570 | 0.0635 |
| OR4F17     | 0.9288 | 1.0537 | 0.9058 | 0.9397 | 0.9570 | 0.0330 |
| LOC442153  | 0.8295 | 1.0728 | 1.1613 | 0.7644 | 0.9570 | 0.0951 |
| SULF1      | 0.8265 | 1.0199 | 1.0783 | 0.9033 | 0.9570 | 0.0567 |
| CLLU1OS    | 0.8822 | 0.9675 | 1.0762 | 0.9021 | 0.9570 | 0.0437 |
| LOC389816  | 0.7917 | 1.2653 | 1.0249 | 0.7462 | 0.9570 | 0.1195 |
| LOC648362  | 0.9364 | 0.9865 | 0.9938 | 0.9113 | 0.9570 | 0.0199 |
| TAF3       | 0.8894 | 1.0621 | 0.9658 | 0.9107 | 0.9570 | 0.0386 |
| FAM75C1    | 0.8488 | 1.1027 | 1.0194 | 0.8571 | 0.9570 | 0.0624 |
| SLC5A3     | 0.8854 | 1.0602 | 0.9384 | 0.9440 | 0.9570 | 0.0369 |
| LOC650883  | 0.9549 | 0.9761 | 0.9479 | 0.9491 | 0.9570 | 0.0065 |
| LOC1001281 | 0.9107 | 1.0004 | 1.0273 | 0.8896 | 0.9570 | 0.0336 |
| MIR365-1   | 0.9583 | 0.9384 | 0.8931 | 1.0382 | 0.9570 | 0.0303 |

|            |        |        |        |        |        |        |
|------------|--------|--------|--------|--------|--------|--------|
| LOC1001331 | 0.7474 | 1.4783 | 0.8796 | 0.7228 | 0.9570 | 0.1771 |
| OR10AD1    | 0.9913 | 0.9490 | 0.9907 | 0.8970 | 0.9570 | 0.0223 |
| LOC729313  | 0.9008 | 0.9727 | 1.0694 | 0.8851 | 0.9570 | 0.0420 |
| LOC440349  | 0.8138 | 1.1023 | 1.0564 | 0.8555 | 0.9570 | 0.0718 |
| LOC1001334 | 0.8619 | 1.0471 | 1.0677 | 0.8514 | 0.9570 | 0.0581 |
| IL2RA      | 0.8918 | 0.9992 | 1.0119 | 0.9253 | 0.9570 | 0.0289 |
| YIPF7      | 0.8684 | 1.0653 | 1.0118 | 0.8827 | 0.9570 | 0.0484 |
| LOC388923  | 0.8346 | 1.1525 | 0.9247 | 0.9164 | 0.9570 | 0.0682 |
| LAMC2      | 0.8644 | 1.0952 | 1.0050 | 0.8636 | 0.9570 | 0.0568 |
| LOC729754  | 0.9749 | 1.0117 | 0.9807 | 0.8608 | 0.9570 | 0.0331 |
| LOC651979  | 0.9189 | 1.1277 | 0.9774 | 0.8042 | 0.9570 | 0.0673 |
| CHST5      | 0.9373 | 1.0585 | 0.9650 | 0.8674 | 0.9571 | 0.0396 |
| AP1M2      | 0.8592 | 1.3043 | 0.8721 | 0.7926 | 0.9571 | 0.1170 |
| LOC1001345 | 0.9433 | 0.9873 | 1.0615 | 0.8362 | 0.9571 | 0.0471 |
| LOC645580  | 0.9254 | 1.0814 | 0.8854 | 0.9361 | 0.9571 | 0.0428 |
| PLSCR2     | 0.9000 | 1.0344 | 1.0412 | 0.8527 | 0.9571 | 0.0476 |
| CASP9      | 0.9592 | 1.0437 | 0.9886 | 0.8367 | 0.9571 | 0.0438 |
| MIR1229    | 0.8296 | 1.0342 | 0.9881 | 0.9765 | 0.9571 | 0.0443 |
| LOC339047  | 0.9440 | 0.9982 | 0.9903 | 0.8958 | 0.9571 | 0.0237 |
| MAP9       | 0.9038 | 0.9818 | 1.0588 | 0.8840 | 0.9571 | 0.0399 |
| HLA-DOA    | 0.8869 | 1.0327 | 1.0006 | 0.9082 | 0.9571 | 0.0353 |
| C17orf39   | 0.9272 | 1.1771 | 0.9048 | 0.8193 | 0.9571 | 0.0769 |
| TLR10      | 0.9268 | 0.9926 | 0.9579 | 0.9511 | 0.9571 | 0.0136 |
| MLANA      | 1.0317 | 1.0092 | 0.9364 | 0.8511 | 0.9571 | 0.0408 |
| FOXF2      | 1.0024 | 0.9699 | 1.0394 | 0.8167 | 0.9571 | 0.0489 |
| LOC729408  | 0.9019 | 1.0805 | 0.9818 | 0.8641 | 0.9571 | 0.0479 |
| LOC652764  | 0.8766 | 0.9927 | 0.9875 | 0.9716 | 0.9571 | 0.0272 |
| TSTD2      | 0.8005 | 1.1800 | 1.0869 | 0.7610 | 0.9571 | 0.1039 |
| LOC652519  | 0.8953 | 1.0005 | 1.0242 | 0.9084 | 0.9571 | 0.0324 |
| C11orf47   | 0.9175 | 1.0534 | 0.9495 | 0.9081 | 0.9571 | 0.0333 |
| SNORA36A   | 0.9005 | 1.1053 | 0.9797 | 0.8430 | 0.9571 | 0.0568 |
| LOC1001285 | 0.9112 | 1.1194 | 0.9784 | 0.8195 | 0.9571 | 0.0631 |
| GBGT1      | 0.9060 | 1.0708 | 0.9727 | 0.8790 | 0.9571 | 0.0427 |
| NALCN      | 0.8782 | 1.0223 | 1.0447 | 0.8833 | 0.9571 | 0.0443 |
| DLEU2L     | 0.9439 | 0.9969 | 0.9781 | 0.9096 | 0.9571 | 0.0193 |
| SNORD56B   | 0.8334 | 1.0255 | 1.0026 | 0.9670 | 0.9571 | 0.0430 |
| LOC1001323 | 0.9317 | 1.0515 | 0.9951 | 0.8502 | 0.9571 | 0.0432 |
| ANTXRL     | 0.8597 | 1.1550 | 0.9665 | 0.8474 | 0.9571 | 0.0712 |
| ABL1       | 0.8549 | 1.2631 | 0.9581 | 0.7525 | 0.9571 | 0.1103 |
| MOCS3      | 0.8353 | 1.2896 | 0.9872 | 0.7165 | 0.9571 | 0.1239 |
| WDR57      | 0.6150 | 1.4929 | 0.9442 | 0.7766 | 0.9572 | 0.1908 |
| MS4A2      | 0.9023 | 1.1655 | 0.9554 | 0.8055 | 0.9572 | 0.0761 |
| BNC2       | 0.8879 | 1.0292 | 1.0130 | 0.8985 | 0.9572 | 0.0371 |
| ZNF840     | 0.9037 | 1.0435 | 1.0058 | 0.8756 | 0.9572 | 0.0401 |
| LOC654096  | 0.8991 | 1.0006 | 1.0064 | 0.9226 | 0.9572 | 0.0272 |
| EMP1       | 0.9444 | 0.9621 | 0.9995 | 0.9227 | 0.9572 | 0.0163 |

|            |        |        |        |        |        |        |
|------------|--------|--------|--------|--------|--------|--------|
| TFCP2      | 0.9080 | 1.1303 | 1.0394 | 0.7510 | 0.9572 | 0.0825 |
| ZNF471     | 0.9190 | 1.1410 | 0.9269 | 0.8418 | 0.9572 | 0.0642 |
| B3GALNT2   | 0.6241 | 1.3449 | 1.1421 | 0.7176 | 0.9572 | 0.1715 |
| ZNF697     | 0.7894 | 1.2952 | 0.9453 | 0.7989 | 0.9572 | 0.1182 |
| MOGAT3     | 0.9503 | 0.9352 | 1.0228 | 0.9205 | 0.9572 | 0.0227 |
| OR8J1      | 0.9381 | 1.0159 | 1.0111 | 0.8637 | 0.9572 | 0.0359 |
| LOC644491  | 0.8577 | 0.9648 | 1.0098 | 0.9966 | 0.9572 | 0.0345 |
| ST6GAL1    | 0.8929 | 1.0641 | 0.9705 | 0.9014 | 0.9572 | 0.0396 |
| LOC1001347 | 0.8760 | 1.0765 | 0.9255 | 0.9509 | 0.9572 | 0.0427 |
| RAP1BL     | 0.9613 | 1.0803 | 0.9700 | 0.8172 | 0.9572 | 0.0540 |
| LOC652287  | 0.9307 | 0.8806 | 1.0620 | 0.9557 | 0.9572 | 0.0382 |
| LOC389669  | 0.8897 | 0.9937 | 1.0548 | 0.8908 | 0.9572 | 0.0406 |
| COL22A1    | 0.9419 | 0.9864 | 1.0547 | 0.8459 | 0.9572 | 0.0438 |
| PLAC8      | 0.9125 | 1.0587 | 0.9829 | 0.8749 | 0.9572 | 0.0406 |
| LOC646446  | 0.8531 | 1.0478 | 1.0340 | 0.8940 | 0.9572 | 0.0491 |
| LOC652644  | 0.9638 | 0.9163 | 1.0634 | 0.8854 | 0.9573 | 0.0389 |
| LOC375323  | 0.8734 | 1.0588 | 0.9906 | 0.9062 | 0.9573 | 0.0419 |
| TPSAB1     | 0.7667 | 1.1536 | 1.0520 | 0.8567 | 0.9573 | 0.0885 |
| RUNX2      | 0.9415 | 1.0001 | 0.9836 | 0.9038 | 0.9573 | 0.0217 |
| ZSCAN4     | 0.9077 | 1.0626 | 0.9755 | 0.8832 | 0.9573 | 0.0402 |
| THEX1      | 0.9562 | 1.0283 | 0.9806 | 0.8640 | 0.9573 | 0.0345 |
| RIG        | 0.9506 | 1.0517 | 0.9569 | 0.8699 | 0.9573 | 0.0372 |
| LOC653061  | 0.8753 | 1.0808 | 0.9799 | 0.8932 | 0.9573 | 0.0471 |
| LOC727820  | 0.8040 | 1.1720 | 0.9362 | 0.9169 | 0.9573 | 0.0773 |
| WNT9B      | 0.8001 | 1.0557 | 1.0687 | 0.9047 | 0.9573 | 0.0643 |
| LOC729815  | 0.8770 | 1.0048 | 1.0724 | 0.8749 | 0.9573 | 0.0489 |
| SAFB       | 0.6466 | 1.6030 | 0.8479 | 0.7318 | 0.9573 | 0.2191 |
| LOC727962  | 0.9201 | 0.9776 | 1.0344 | 0.8972 | 0.9573 | 0.0308 |
| GM2A       | 0.9249 | 1.0936 | 0.9728 | 0.8380 | 0.9573 | 0.0533 |
| HINT1      | 0.8137 | 1.2412 | 1.0005 | 0.7739 | 0.9573 | 0.1067 |
| ATM        | 0.8348 | 1.1739 | 0.9848 | 0.8358 | 0.9573 | 0.0803 |
| LOC642767  | 0.8380 | 1.1038 | 1.0012 | 0.8864 | 0.9573 | 0.0596 |
| WNT9A      | 0.8933 | 1.0897 | 0.9634 | 0.8830 | 0.9573 | 0.0476 |
| GPX5       | 0.9569 | 1.0374 | 0.9288 | 0.9063 | 0.9574 | 0.0286 |
| C19orf29   | 0.8873 | 1.0983 | 0.9749 | 0.8690 | 0.9574 | 0.0524 |
| CCDC126    | 0.9939 | 0.9919 | 1.0377 | 0.8060 | 0.9574 | 0.0515 |
| SLC16A8    | 0.8767 | 1.0275 | 1.0588 | 0.8664 | 0.9574 | 0.0500 |
| LOC644979  | 0.9241 | 1.0727 | 1.0187 | 0.8139 | 0.9574 | 0.0568 |
| LOC1001296 | 0.8765 | 1.0728 | 0.9622 | 0.9180 | 0.9574 | 0.0423 |
| MAS1L      | 0.9966 | 1.0469 | 0.9482 | 0.8378 | 0.9574 | 0.0447 |
| LOC646146  | 0.9071 | 1.0714 | 0.9853 | 0.8657 | 0.9574 | 0.0454 |
| LOC391037  | 0.9089 | 0.9986 | 1.0170 | 0.9050 | 0.9574 | 0.0294 |
| TMED8      | 0.8852 | 1.0575 | 0.9783 | 0.9086 | 0.9574 | 0.0388 |
| GAS1       | 0.9373 | 1.0936 | 1.0108 | 0.7879 | 0.9574 | 0.0649 |
| AQR        | 0.9282 | 1.2289 | 0.9044 | 0.7680 | 0.9574 | 0.0972 |
| LOC255167  | 0.9042 | 1.0734 | 1.0834 | 0.7686 | 0.9574 | 0.0752 |

|            |        |        |        |        |        |        |
|------------|--------|--------|--------|--------|--------|--------|
| LOC643403  | 0.9406 | 0.9720 | 1.0475 | 0.8695 | 0.9574 | 0.0369 |
| IL2        | 0.7995 | 1.1296 | 1.1022 | 0.7983 | 0.9574 | 0.0917 |
| LOC126520  | 0.9065 | 1.0142 | 1.0067 | 0.9022 | 0.9574 | 0.0307 |
| LOC1001322 | 0.9319 | 0.9723 | 1.0366 | 0.8888 | 0.9574 | 0.0314 |
| LOC652647  | 0.8303 | 0.9997 | 1.0561 | 0.9437 | 0.9574 | 0.0482 |
| GRID2      | 0.9696 | 0.9626 | 0.9988 | 0.8987 | 0.9574 | 0.0211 |
| CDKN2BAS   | 0.8305 | 1.0855 | 1.0378 | 0.8760 | 0.9574 | 0.0616 |
| SNORD32B   | 0.9190 | 1.0987 | 1.0379 | 0.7741 | 0.9574 | 0.0716 |
| MAPKSP1    | 0.8906 | 1.0744 | 0.9829 | 0.8818 | 0.9574 | 0.0452 |
| MCC        | 0.8417 | 1.1738 | 0.9114 | 0.9028 | 0.9574 | 0.0738 |
| FAM19A3    | 0.9432 | 1.0612 | 0.9544 | 0.8709 | 0.9574 | 0.0392 |
| LOC647328  | 0.9017 | 1.0316 | 1.0041 | 0.8924 | 0.9574 | 0.0354 |
| LOC643424  | 1.0023 | 1.0123 | 0.9781 | 0.8371 | 0.9574 | 0.0408 |
| PLCG2      | 0.9147 | 1.1156 | 0.9750 | 0.8245 | 0.9574 | 0.0611 |
| LOC730024  | 0.9977 | 1.0625 | 0.9645 | 0.8051 | 0.9574 | 0.0547 |
| ZNF280B    | 0.8529 | 1.0710 | 1.0216 | 0.8843 | 0.9574 | 0.0527 |
| GMPR       | 0.9110 | 1.1819 | 0.8338 | 0.9032 | 0.9575 | 0.0768 |
| ASB18      | 0.9320 | 1.0859 | 0.9158 | 0.8962 | 0.9575 | 0.0434 |
| CCKAR      | 0.9176 | 0.9900 | 1.0025 | 0.9198 | 0.9575 | 0.0225 |
| GUCY2F     | 0.9812 | 1.0076 | 0.9818 | 0.8593 | 0.9575 | 0.0333 |
| LOC1001329 | 0.8735 | 1.1365 | 0.8966 | 0.9233 | 0.9575 | 0.0605 |
| GPX8       | 0.9821 | 1.0910 | 0.9178 | 0.8390 | 0.9575 | 0.0533 |
| NXF3       | 1.0247 | 0.9565 | 0.9840 | 0.8647 | 0.9575 | 0.0340 |
| CEP350     | 0.7270 | 1.3930 | 0.8611 | 0.8488 | 0.9575 | 0.1483 |
| CWC22      | 0.9792 | 1.0218 | 0.9753 | 0.8536 | 0.9575 | 0.0362 |
| LOC645090  | 0.9059 | 1.0936 | 1.0989 | 0.7316 | 0.9575 | 0.0877 |
| OR2T6      | 0.9141 | 1.0240 | 0.9991 | 0.8928 | 0.9575 | 0.0319 |
| LOC645302  | 0.8577 | 1.1216 | 1.0033 | 0.8474 | 0.9575 | 0.0653 |
| LOC1001329 | 0.8364 | 1.1338 | 0.9285 | 0.9313 | 0.9575 | 0.0628 |
| SLC23A3    | 0.8692 | 1.0580 | 0.9390 | 0.9638 | 0.9575 | 0.0390 |
| ZNF556     | 0.7769 | 1.1151 | 1.0638 | 0.8742 | 0.9575 | 0.0794 |
| PCIF1      | 0.8905 | 1.0688 | 0.9980 | 0.8728 | 0.9575 | 0.0463 |
| LOC339970  | 0.9913 | 1.1747 | 0.8348 | 0.8292 | 0.9575 | 0.0816 |
| LOC653178  | 0.7713 | 1.0884 | 1.0649 | 0.9054 | 0.9575 | 0.0742 |
| LOC1001326 | 0.8743 | 1.0943 | 0.9945 | 0.8670 | 0.9575 | 0.0542 |
| LOC1001327 | 0.8981 | 1.0937 | 0.9764 | 0.8620 | 0.9575 | 0.0513 |
| LOC647286  | 0.9446 | 1.0506 | 0.9672 | 0.8678 | 0.9575 | 0.0376 |
| CDC14B     | 0.8799 | 1.2245 | 0.9335 | 0.7922 | 0.9575 | 0.0936 |
| EEA1       | 0.8625 | 1.0735 | 1.0464 | 0.8478 | 0.9576 | 0.0595 |
| ABCC3      | 0.9629 | 1.0843 | 0.8945 | 0.8886 | 0.9576 | 0.0455 |
| LOC651219  | 0.9145 | 0.9878 | 1.0312 | 0.8967 | 0.9576 | 0.0315 |
| FLJ90036   | 0.8109 | 1.1278 | 1.0108 | 0.8808 | 0.9576 | 0.0702 |
| CEP97      | 0.8872 | 1.0478 | 1.0293 | 0.8659 | 0.9576 | 0.0471 |
| ROBO1      | 0.9082 | 1.0000 | 1.0250 | 0.8971 | 0.9576 | 0.0322 |
| LYPD6      | 0.9214 | 0.9645 | 1.0207 | 0.9237 | 0.9576 | 0.0232 |
| ZNF782     | 0.8816 | 1.0174 | 1.0545 | 0.8768 | 0.9576 | 0.0459 |

|            |        |        |        |        |        |        |
|------------|--------|--------|--------|--------|--------|--------|
| LOC348840  | 0.9676 | 1.0716 | 0.9683 | 0.8229 | 0.9576 | 0.0511 |
| LOC442064  | 0.9670 | 1.0912 | 0.9726 | 0.7995 | 0.9576 | 0.0600 |
| DCHS2      | 0.9797 | 1.0459 | 0.9366 | 0.8681 | 0.9576 | 0.0373 |
| ATRN       | 1.0050 | 1.1720 | 0.8922 | 0.7612 | 0.9576 | 0.0871 |
| MIR944     | 0.9408 | 1.0204 | 0.9895 | 0.8796 | 0.9576 | 0.0307 |
| C15orf51   | 0.8279 | 1.0336 | 1.0321 | 0.9367 | 0.9576 | 0.0488 |
| LOC729603  | 0.7946 | 1.3119 | 1.0175 | 0.7063 | 0.9576 | 0.1350 |
| LOC646194  | 0.7949 | 1.2368 | 0.9846 | 0.8142 | 0.9576 | 0.1023 |
| LOC1001335 | 0.9720 | 0.9462 | 1.1251 | 0.7871 | 0.9576 | 0.0692 |
| LOC652904  | 0.8354 | 1.1050 | 0.9655 | 0.9244 | 0.9576 | 0.0561 |
| LOC647920  | 0.9628 | 1.0351 | 0.9822 | 0.8504 | 0.9576 | 0.0389 |
| HIST1H2AB  | 0.9227 | 0.9507 | 1.0306 | 0.9265 | 0.9576 | 0.0251 |
| KCNQ1OT1   | 0.9142 | 0.9418 | 1.1345 | 0.8401 | 0.9576 | 0.0627 |
| C13orf7    | 0.9851 | 0.9493 | 0.9166 | 0.9796 | 0.9576 | 0.0158 |
| TFAP2B     | 0.8653 | 1.0600 | 1.0177 | 0.8876 | 0.9576 | 0.0479 |
| LOC728763  | 0.8452 | 1.0611 | 1.0420 | 0.8823 | 0.9576 | 0.0549 |
| LOC648733  | 0.8794 | 1.0523 | 1.0371 | 0.8618 | 0.9576 | 0.0505 |
| LOC642903  | 0.9187 | 1.0042 | 1.0827 | 0.8250 | 0.9577 | 0.0555 |
| LOC1001319 | 0.8454 | 1.0746 | 0.9810 | 0.9296 | 0.9577 | 0.0480 |
| LEFTY1     | 0.9092 | 1.0987 | 0.9971 | 0.8257 | 0.9577 | 0.0586 |
| TMC3       | 0.8948 | 1.0811 | 0.8917 | 0.9632 | 0.9577 | 0.0443 |
| LOC1001303 | 0.9099 | 1.0661 | 0.9664 | 0.8884 | 0.9577 | 0.0397 |
| PWRN2      | 0.9857 | 1.0902 | 0.8768 | 0.8782 | 0.9577 | 0.0510 |
| FAM122A    | 0.8037 | 1.2927 | 0.9161 | 0.8184 | 0.9577 | 0.1144 |
| LOC1001343 | 0.9404 | 1.0820 | 0.9006 | 0.9078 | 0.9577 | 0.0423 |
| FAM65C     | 0.8485 | 1.1310 | 0.9424 | 0.9090 | 0.9577 | 0.0609 |
| LOC1001310 | 0.8739 | 1.0496 | 0.9109 | 0.9965 | 0.9577 | 0.0399 |
| ZFP112     | 0.9773 | 1.1180 | 0.9411 | 0.7945 | 0.9577 | 0.0665 |
| LOC729259  | 0.8734 | 1.1510 | 1.0233 | 0.7832 | 0.9577 | 0.0812 |
| TAF4B      | 0.9504 | 0.9527 | 1.0169 | 0.9109 | 0.9577 | 0.0220 |
| MAP3K13    | 0.7783 | 1.1001 | 1.1417 | 0.8107 | 0.9577 | 0.0948 |
| YY1AP1     | 0.9083 | 1.3773 | 0.9021 | 0.6432 | 0.9577 | 0.1529 |
| CTHRC1     | 0.9129 | 0.9999 | 1.0512 | 0.8670 | 0.9577 | 0.0416 |
| LOC1001337 | 0.8830 | 1.0450 | 1.0640 | 0.8389 | 0.9577 | 0.0567 |
| TNNT2      | 0.9439 | 1.0580 | 0.9422 | 0.8868 | 0.9577 | 0.0360 |
| CTAGE5     | 0.9088 | 1.0713 | 0.9789 | 0.8719 | 0.9577 | 0.0439 |
| LOC1001333 | 0.9481 | 1.0498 | 0.9561 | 0.8771 | 0.9577 | 0.0354 |
| LOC1001292 | 0.8902 | 0.9553 | 1.0275 | 0.9581 | 0.9577 | 0.0280 |
| AKT2       | 0.8853 | 1.0128 | 1.0523 | 0.8806 | 0.9578 | 0.0439 |
| LOC651850  | 0.8742 | 0.9466 | 1.0416 | 0.9687 | 0.9578 | 0.0345 |
| ALK        | 0.8548 | 1.1106 | 0.9392 | 0.9265 | 0.9578 | 0.0542 |
| LOC729350  | 0.9139 | 1.0530 | 0.9812 | 0.8830 | 0.9578 | 0.0378 |
| LOC642249  | 0.9313 | 1.0161 | 1.0346 | 0.8491 | 0.9578 | 0.0426 |
| CTSL3      | 0.8290 | 1.1284 | 0.9844 | 0.8894 | 0.9578 | 0.0653 |
| LOC652490  | 0.8714 | 1.0696 | 1.0542 | 0.8360 | 0.9578 | 0.0606 |
| PRDM14     | 0.9244 | 0.9767 | 1.0154 | 0.9147 | 0.9578 | 0.0235 |

|           |        |        |        |        |        |        |
|-----------|--------|--------|--------|--------|--------|--------|
| CDH24     | 0.9647 | 1.0968 | 0.9237 | 0.8459 | 0.9578 | 0.0525 |
| LOC653576 | 1.0726 | 0.8653 | 0.9843 | 0.9091 | 0.9578 | 0.0455 |
| KRT20     | 0.9456 | 1.0867 | 0.9356 | 0.8632 | 0.9578 | 0.0467 |
| LOC729954 | 0.9373 | 1.0337 | 1.0030 | 0.8572 | 0.9578 | 0.0391 |
| LOC283663 | 0.9595 | 1.0937 | 0.9579 | 0.8202 | 0.9578 | 0.0558 |
| SPN       | 0.9329 | 1.0024 | 0.9742 | 0.9216 | 0.9578 | 0.0187 |
| FGF16     | 0.8676 | 1.0435 | 1.0519 | 0.8682 | 0.9578 | 0.0519 |
| PNMA5     | 0.9528 | 1.0238 | 0.9576 | 0.8971 | 0.9578 | 0.0259 |
| FLJ14100  | 0.8828 | 1.0903 | 0.9875 | 0.8707 | 0.9578 | 0.0514 |
| LOC220594 | 0.8898 | 1.0292 | 0.9774 | 0.9349 | 0.9578 | 0.0298 |
| CRY1      | 0.9032 | 1.2196 | 0.9731 | 0.7354 | 0.9578 | 0.1005 |
| LOC732162 | 0.9478 | 0.9872 | 0.9689 | 0.9273 | 0.9578 | 0.0130 |
| DISC2     | 0.8755 | 1.0326 | 1.0486 | 0.8746 | 0.9578 | 0.0479 |
| SH3BGR    | 0.9169 | 1.1192 | 0.9717 | 0.8235 | 0.9578 | 0.0619 |
| POM121L2  | 0.7942 | 1.0827 | 1.0867 | 0.8678 | 0.9578 | 0.0748 |
| SPAG1     | 0.8617 | 1.1144 | 0.9879 | 0.8673 | 0.9578 | 0.0598 |
| LOC149224 | 0.8484 | 1.0703 | 1.0963 | 0.8164 | 0.9578 | 0.0729 |
| GBP1      | 0.9415 | 0.9933 | 0.9723 | 0.9243 | 0.9579 | 0.0154 |
| OR10A3    | 0.8831 | 0.9847 | 1.0432 | 0.9204 | 0.9579 | 0.0354 |
| LOC439914 | 0.9611 | 1.0643 | 1.1312 | 0.6749 | 0.9579 | 0.1006 |
| LOC729494 | 0.8920 | 1.0554 | 0.9400 | 0.9441 | 0.9579 | 0.0346 |
| LOC644843 | 0.9910 | 1.0611 | 0.9429 | 0.8365 | 0.9579 | 0.0472 |
| LOC200493 | 0.9626 | 1.0383 | 0.9536 | 0.8770 | 0.9579 | 0.0330 |
| LOC647841 | 0.6869 | 1.1078 | 1.0332 | 1.0036 | 0.9579 | 0.0930 |
| NECAB1    | 0.9604 | 1.0263 | 1.0842 | 0.7607 | 0.9579 | 0.0704 |
| LOC729173 | 0.9625 | 1.0660 | 0.9315 | 0.8716 | 0.9579 | 0.0407 |
| AIM2      | 0.9198 | 0.9984 | 0.9752 | 0.9382 | 0.9579 | 0.0177 |
| RAMP2     | 0.8376 | 1.0663 | 0.9752 | 0.9524 | 0.9579 | 0.0470 |
| PRSS27    | 0.9972 | 1.0177 | 0.9677 | 0.8490 | 0.9579 | 0.0377 |
| ZNF585B   | 0.8516 | 1.1152 | 0.9947 | 0.8701 | 0.9579 | 0.0613 |
| LOC391358 | 0.9402 | 1.0321 | 0.9693 | 0.8901 | 0.9579 | 0.0297 |
| MIR601    | 0.9016 | 1.0708 | 0.9299 | 0.9294 | 0.9579 | 0.0382 |
| PABPC1L2B | 0.9056 | 1.0214 | 0.9875 | 0.9172 | 0.9579 | 0.0278 |
| AADACL2   | 0.9640 | 0.9950 | 0.9340 | 0.9387 | 0.9579 | 0.0140 |
| LOC651643 | 0.8217 | 1.1466 | 1.0075 | 0.8559 | 0.9579 | 0.0747 |
| MIR614    | 0.8854 | 1.0874 | 1.0475 | 0.8114 | 0.9579 | 0.0655 |
| KIAA1600  | 0.8107 | 1.1730 | 1.1039 | 0.7442 | 0.9579 | 0.1060 |
| LOC647308 | 0.8818 | 1.0299 | 1.0227 | 0.8974 | 0.9580 | 0.0396 |
| LOC285407 | 0.9092 | 1.1264 | 0.9909 | 0.8053 | 0.9580 | 0.0678 |
| LOC653461 | 0.9638 | 1.0047 | 0.9460 | 0.9174 | 0.9580 | 0.0183 |
| L1TD1     | 0.8745 | 1.0702 | 0.9930 | 0.8942 | 0.9580 | 0.0455 |
| ZSCAN5B   | 0.8675 | 1.0424 | 1.0002 | 0.9219 | 0.9580 | 0.0391 |
| LOC653663 | 0.8868 | 1.0376 | 1.0140 | 0.8935 | 0.9580 | 0.0395 |
| UNG2      | 0.9493 | 1.0605 | 0.9086 | 0.9135 | 0.9580 | 0.0354 |
| OLIG3     | 0.9354 | 1.0833 | 0.9610 | 0.8523 | 0.9580 | 0.0478 |
| DLL1      | 0.9404 | 1.1259 | 0.9041 | 0.8616 | 0.9580 | 0.0582 |



|            |        |        |        |        |        |        |
|------------|--------|--------|--------|--------|--------|--------|
| LOC643640  | 0.9232 | 1.0267 | 0.9539 | 0.9282 | 0.9580 | 0.0239 |
| IL17A      | 0.8775 | 1.0662 | 0.9766 | 0.9117 | 0.9580 | 0.0415 |
| LOC1001296 | 0.9127 | 0.9309 | 1.1041 | 0.8842 | 0.9580 | 0.0496 |
| LOC644268  | 0.9390 | 1.0858 | 0.9887 | 0.8186 | 0.9580 | 0.0556 |
| LOC1001321 | 0.8237 | 1.0691 | 1.0037 | 0.9356 | 0.9580 | 0.0524 |
| ACTG2      | 0.8667 | 1.0449 | 1.1105 | 0.8100 | 0.9580 | 0.0713 |
| LOC340094  | 0.8674 | 0.9550 | 1.0655 | 0.9442 | 0.9580 | 0.0408 |
| LOC647206  | 1.0223 | 0.8584 | 1.0801 | 0.8713 | 0.9580 | 0.0552 |
| XAGE2B     | 0.8690 | 1.1972 | 0.8830 | 0.8829 | 0.9580 | 0.0798 |
| ATRNL1     | 0.7981 | 1.1396 | 0.9966 | 0.8978 | 0.9580 | 0.0728 |
| LOC644415  | 0.8528 | 1.1119 | 0.9470 | 0.9204 | 0.9580 | 0.0550 |
| LOC389458  | 0.9236 | 1.0857 | 0.9319 | 0.8911 | 0.9580 | 0.0435 |
| LOC400590  | 0.9345 | 1.0742 | 0.9754 | 0.8481 | 0.9580 | 0.0469 |
| C3orf74    | 0.8504 | 1.1036 | 1.0402 | 0.8379 | 0.9581 | 0.0671 |
| ALG12      | 0.9294 | 1.0826 | 0.9676 | 0.8526 | 0.9581 | 0.0479 |
| AIG1       | 0.7500 | 1.1365 | 1.2181 | 0.7276 | 0.9581 | 0.1278 |
| INSIG2     | 0.7846 | 1.4508 | 0.9837 | 0.6132 | 0.9581 | 0.1809 |
| IQSEC3     | 0.9040 | 1.1392 | 0.9295 | 0.8595 | 0.9581 | 0.0621 |
| TEX261     | 0.8919 | 1.2494 | 1.0366 | 0.6544 | 0.9581 | 0.1250 |
| LOC649676  | 0.8001 | 1.1551 | 1.0195 | 0.8577 | 0.9581 | 0.0804 |
| LOC727997  | 0.9175 | 0.9400 | 1.1299 | 0.8449 | 0.9581 | 0.0608 |
| LOC387927  | 0.8906 | 1.1630 | 0.9846 | 0.7942 | 0.9581 | 0.0786 |
| CEMP1      | 0.8641 | 1.0406 | 0.9886 | 0.9392 | 0.9581 | 0.0376 |
| MARCKS     | 0.9773 | 1.1075 | 1.0300 | 0.7177 | 0.9581 | 0.0845 |
| LOC442582  | 0.7605 | 1.1042 | 1.0829 | 0.8848 | 0.9581 | 0.0823 |
| GJB1       | 0.8349 | 1.0540 | 1.0268 | 0.9167 | 0.9581 | 0.0507 |
| DIRAS3     | 0.9568 | 1.0317 | 0.9856 | 0.8583 | 0.9581 | 0.0367 |
| SIAH3      | 0.8907 | 1.0640 | 1.0199 | 0.8579 | 0.9581 | 0.0497 |
| DOCK5      | 0.9856 | 1.0159 | 0.9627 | 0.8682 | 0.9581 | 0.0319 |
| LOC653355  | 0.8777 | 1.1220 | 0.9841 | 0.8488 | 0.9581 | 0.0619 |
| LOC1001345 | 0.9262 | 1.0330 | 1.0231 | 0.8503 | 0.9581 | 0.0433 |
| LOC649060  | 0.9350 | 0.9767 | 1.0804 | 0.8405 | 0.9581 | 0.0497 |
| C20orf51   | 0.9023 | 1.0603 | 0.9099 | 0.9601 | 0.9581 | 0.0364 |
| TAS2R9     | 0.9222 | 1.1408 | 0.9076 | 0.8620 | 0.9581 | 0.0622 |
| HS3ST6     | 0.9197 | 1.0042 | 1.0697 | 0.8390 | 0.9581 | 0.0502 |
| ZNF364     | 0.7749 | 1.2638 | 0.9499 | 0.8440 | 0.9581 | 0.1080 |
| LOC642826  | 0.9437 | 1.0348 | 1.0208 | 0.8333 | 0.9581 | 0.0462 |
| OR13G1     | 0.9159 | 0.9521 | 1.0541 | 0.9106 | 0.9582 | 0.0333 |
| LOC1001338 | 0.8896 | 1.1430 | 0.9058 | 0.8942 | 0.9582 | 0.0617 |
| LOC643844  | 0.9035 | 1.0850 | 1.0297 | 0.8145 | 0.9582 | 0.0611 |
| LOC1001308 | 0.8602 | 1.1182 | 0.9837 | 0.8705 | 0.9582 | 0.0602 |
| LOC1001334 | 0.8997 | 1.0362 | 0.9928 | 0.9040 | 0.9582 | 0.0337 |
| ZNF273     | 0.8643 | 1.0083 | 1.0115 | 0.9486 | 0.9582 | 0.0345 |
| ANKRD43    | 0.9900 | 1.0069 | 1.0191 | 0.8167 | 0.9582 | 0.0475 |
| LOC642628  | 0.8510 | 1.1591 | 0.9498 | 0.8729 | 0.9582 | 0.0702 |
| LOC644447  | 0.8311 | 1.0705 | 0.9653 | 0.9659 | 0.9582 | 0.0491 |

|            |        |        |        |        |        |        |
|------------|--------|--------|--------|--------|--------|--------|
| LOC647028  | 0.9706 | 1.0105 | 1.0031 | 0.8486 | 0.9582 | 0.0376 |
| LOC729856  | 0.9756 | 1.0217 | 0.9197 | 0.9158 | 0.9582 | 0.0252 |
| ATP8B3     | 0.9793 | 1.0015 | 0.9377 | 0.9144 | 0.9582 | 0.0197 |
| LOC728991  | 0.8745 | 1.0403 | 1.0222 | 0.8959 | 0.9582 | 0.0425 |
| LOC648039  | 0.8280 | 1.0342 | 0.9662 | 1.0046 | 0.9582 | 0.0456 |
| HEATR6     | 0.8861 | 1.3239 | 0.8424 | 0.7805 | 0.9582 | 0.1238 |
| SMCHD1     | 0.9026 | 1.0905 | 1.0143 | 0.8254 | 0.9582 | 0.0587 |
| PAX4       | 0.8671 | 1.1353 | 0.9321 | 0.8984 | 0.9582 | 0.0605 |
| ADAM8      | 0.9392 | 1.0004 | 1.0237 | 0.8696 | 0.9582 | 0.0345 |
| VEGFC      | 0.9735 | 1.0156 | 0.9983 | 0.8455 | 0.9582 | 0.0386 |
| MAGEB5     | 1.0567 | 0.7835 | 0.9900 | 1.0027 | 0.9582 | 0.0600 |
| LOC728199  | 0.9121 | 1.0163 | 1.0422 | 0.8623 | 0.9582 | 0.0426 |
| LOC651410  | 1.0207 | 0.9404 | 0.9481 | 0.9237 | 0.9582 | 0.0214 |
| CTGLF1     | 1.0005 | 1.0089 | 1.0149 | 0.8088 | 0.9582 | 0.0499 |
| LRRC24     | 0.9449 | 1.0669 | 1.0503 | 0.7708 | 0.9582 | 0.0681 |
| LOC441931  | 0.8942 | 1.0672 | 1.0776 | 0.7941 | 0.9583 | 0.0690 |
| LOC390669  | 0.8941 | 1.0226 | 0.9768 | 0.9395 | 0.9583 | 0.0273 |
| WDR61      | 0.8293 | 1.3260 | 0.9705 | 0.7072 | 0.9583 | 0.1339 |
| LOC647197  | 0.9582 | 0.9947 | 0.9788 | 0.9014 | 0.9583 | 0.0204 |
| PRKAG1     | 0.9058 | 1.2797 | 0.9468 | 0.7008 | 0.9583 | 0.1199 |
| LOC1001322 | 0.8005 | 1.1082 | 1.0009 | 0.9235 | 0.9583 | 0.0648 |
| LOC643142  | 0.9990 | 1.0125 | 0.9200 | 0.9016 | 0.9583 | 0.0278 |
| CD248      | 0.8436 | 1.0190 | 1.0419 | 0.9287 | 0.9583 | 0.0454 |
| PER4       | 0.9622 | 1.0310 | 0.9841 | 0.8559 | 0.9583 | 0.0370 |
| FGFR1OP2   | 0.9298 | 1.1504 | 0.9655 | 0.7875 | 0.9583 | 0.0747 |
| LOC51149   | 0.9733 | 1.0714 | 0.9826 | 0.8059 | 0.9583 | 0.0554 |
| BCAT1      | 0.8375 | 1.0578 | 1.0693 | 0.8687 | 0.9583 | 0.0611 |
| FEZF2      | 0.8592 | 1.0687 | 1.0680 | 0.8375 | 0.9583 | 0.0637 |
| ZNF862     | 0.9192 | 1.1906 | 0.9289 | 0.7947 | 0.9583 | 0.0832 |
| TIMP3      | 0.9811 | 0.9992 | 0.9265 | 0.9265 | 0.9583 | 0.0187 |
| C1orf147   | 0.8741 | 1.1937 | 0.9728 | 0.7928 | 0.9583 | 0.0867 |
| KLK14      | 0.8953 | 1.0433 | 1.0022 | 0.8927 | 0.9584 | 0.0381 |
| LOC649327  | 0.9856 | 0.9969 | 0.9602 | 0.8907 | 0.9584 | 0.0238 |
| ERAP2      | 0.8510 | 1.1949 | 0.9324 | 0.8552 | 0.9584 | 0.0810 |
| LOC729485  | 0.8719 | 1.0920 | 0.9401 | 0.9295 | 0.9584 | 0.0470 |
| FAM172A    | 0.8502 | 1.1892 | 1.0119 | 0.7822 | 0.9584 | 0.0908 |
| LOC651957  | 0.8712 | 1.0888 | 1.0993 | 0.7742 | 0.9584 | 0.0808 |
| WFIKKN2    | 1.0096 | 0.9739 | 0.9863 | 0.8636 | 0.9584 | 0.0324 |
| TMPRSS4    | 0.9301 | 1.0523 | 0.9898 | 0.8613 | 0.9584 | 0.0409 |
| ZDHHC1     | 0.9353 | 1.0905 | 0.9426 | 0.8651 | 0.9584 | 0.0474 |
| LOC729389  | 0.9862 | 1.0812 | 0.8916 | 0.8745 | 0.9584 | 0.0477 |
| ALPL       | 0.9357 | 1.0086 | 0.9858 | 0.9033 | 0.9584 | 0.0238 |
| CLEC4GP1   | 0.9931 | 1.0195 | 0.9483 | 0.8727 | 0.9584 | 0.0321 |
| ACOT12     | 0.8799 | 1.0247 | 1.0425 | 0.8865 | 0.9584 | 0.0436 |
| ZRSR2      | 0.9728 | 1.0256 | 0.9593 | 0.8758 | 0.9584 | 0.0310 |
| S100A3     | 0.9250 | 1.0403 | 0.9206 | 0.9477 | 0.9584 | 0.0279 |

|            |        |        |        |        |        |        |
|------------|--------|--------|--------|--------|--------|--------|
| LOC1001328 | 0.9369 | 0.9529 | 0.9991 | 0.9446 | 0.9584 | 0.0140 |
| CELSR1     | 0.9512 | 1.0592 | 0.9258 | 0.8974 | 0.9584 | 0.0354 |
| IGHMBP2    | 0.8498 | 1.1392 | 0.9456 | 0.8990 | 0.9584 | 0.0634 |
| LOC649583  | 0.8651 | 1.0613 | 1.0390 | 0.8682 | 0.9584 | 0.0532 |
| LOC1001314 | 0.9119 | 1.0359 | 0.9250 | 0.9608 | 0.9584 | 0.0278 |
| OAS3       | 0.8909 | 1.0351 | 0.9695 | 0.9381 | 0.9584 | 0.0302 |
| LOC649389  | 0.9522 | 1.0432 | 0.9228 | 0.9155 | 0.9584 | 0.0293 |
| YAP1       | 0.9603 | 1.0100 | 1.1394 | 0.7239 | 0.9584 | 0.0868 |
| PRKAR2A    | 0.7518 | 1.4092 | 0.8706 | 0.8022 | 0.9584 | 0.1522 |
| LOC1001317 | 0.9338 | 1.0483 | 0.9600 | 0.8915 | 0.9584 | 0.0331 |
| KIAA0773   | 0.7478 | 1.0915 | 1.0167 | 0.9778 | 0.9584 | 0.0741 |
| LOC440291  | 1.0462 | 1.0308 | 0.9078 | 0.8490 | 0.9585 | 0.0478 |
| CC2D1B     | 0.8650 | 1.0801 | 0.9495 | 0.9393 | 0.9585 | 0.0447 |
| ANAPC4     | 0.8273 | 1.3785 | 0.9617 | 0.6664 | 0.9585 | 0.1525 |
| C11orf36   | 0.9370 | 1.1813 | 0.8303 | 0.8853 | 0.9585 | 0.0774 |
| LOC647450  | 0.8454 | 1.0685 | 1.0388 | 0.8811 | 0.9585 | 0.0558 |
| LOC653326  | 0.9080 | 1.0078 | 1.0053 | 0.9127 | 0.9585 | 0.0278 |
| LOC1001345 | 0.9163 | 1.1716 | 0.8538 | 0.8922 | 0.9585 | 0.0722 |
| SNORD107   | 0.8723 | 0.9603 | 1.0557 | 0.9456 | 0.9585 | 0.0377 |
| LOC1001323 | 0.7907 | 1.0513 | 1.0372 | 0.9547 | 0.9585 | 0.0599 |
| GABBR2     | 0.8479 | 1.0576 | 1.0022 | 0.9263 | 0.9585 | 0.0456 |
| GPR35      | 0.8426 | 1.0007 | 1.0115 | 0.9790 | 0.9585 | 0.0392 |
| LOC388476  | 0.9224 | 1.1215 | 0.9834 | 0.8066 | 0.9585 | 0.0656 |
| LOC387745  | 0.9125 | 1.2160 | 0.9405 | 0.7649 | 0.9585 | 0.0941 |
| LOC647753  | 0.9021 | 1.0642 | 0.9901 | 0.8775 | 0.9585 | 0.0427 |
| LOC728308  | 0.9447 | 1.0914 | 0.9562 | 0.8416 | 0.9585 | 0.0513 |
| CFC1       | 0.7776 | 1.0548 | 0.9884 | 1.0133 | 0.9585 | 0.0618 |
| PTPRJ      | 0.9286 | 1.1041 | 0.9538 | 0.8475 | 0.9585 | 0.0536 |
| LOC652298  | 0.9398 | 1.0218 | 0.9474 | 0.9250 | 0.9585 | 0.0216 |
| OR2S2      | 0.9463 | 1.0469 | 0.9962 | 0.8446 | 0.9585 | 0.0432 |
| LOC647989  | 0.9118 | 0.9596 | 1.0146 | 0.9482 | 0.9585 | 0.0213 |
| LOC646357  | 0.9796 | 0.9847 | 1.0251 | 0.8447 | 0.9585 | 0.0393 |
| TAS2R10    | 0.8636 | 1.0864 | 0.9547 | 0.9295 | 0.9585 | 0.0467 |
| MS4A6E     | 0.9107 | 1.0115 | 1.0412 | 0.8707 | 0.9585 | 0.0405 |
| LOC648358  | 0.9732 | 1.0206 | 0.9757 | 0.8645 | 0.9585 | 0.0332 |
| TLR3       | 0.9275 | 1.0180 | 1.0137 | 0.8749 | 0.9585 | 0.0348 |
| ERCC-00058 | 0.8504 | 1.1496 | 0.9171 | 0.9170 | 0.9585 | 0.0656 |
| RREB1      | 0.8874 | 1.1582 | 0.9765 | 0.8121 | 0.9585 | 0.0745 |
| LOC133874  | 0.8688 | 1.1273 | 1.0554 | 0.7827 | 0.9585 | 0.0800 |
| CPLX1      | 0.9221 | 1.2384 | 0.9502 | 0.7235 | 0.9586 | 0.1060 |
| IFNA1      | 0.8996 | 0.9898 | 1.0679 | 0.8769 | 0.9586 | 0.0438 |
| ELFN1      | 0.9863 | 1.0202 | 1.0056 | 0.8222 | 0.9586 | 0.0460 |
| OR52B6     | 0.9665 | 1.0696 | 0.9675 | 0.8307 | 0.9586 | 0.0490 |
| LOC652215  | 0.8513 | 0.9639 | 1.0285 | 0.9906 | 0.9586 | 0.0381 |
| C14orf177  | 0.8982 | 1.0234 | 0.9681 | 0.9446 | 0.9586 | 0.0260 |
| AGTR2      | 0.7959 | 1.1030 | 1.0329 | 0.9025 | 0.9586 | 0.0683 |

|            |        |        |        |        |        |        |
|------------|--------|--------|--------|--------|--------|--------|
| LOC646256  | 0.8903 | 1.1419 | 0.9338 | 0.8684 | 0.9586 | 0.0626 |
| IDI1       | 0.8979 | 1.0774 | 1.1893 | 0.6698 | 0.9586 | 0.1134 |
| LOC653056  | 0.9441 | 1.0390 | 0.9477 | 0.9036 | 0.9586 | 0.0286 |
| LOC652113  | 0.8861 | 1.0489 | 1.0848 | 0.8147 | 0.9586 | 0.0646 |
| KIAA2022   | 0.8449 | 1.0584 | 0.9948 | 0.9364 | 0.9586 | 0.0454 |
| ZNF157     | 0.9503 | 1.0115 | 0.9448 | 0.9279 | 0.9586 | 0.0183 |
| PRB2       | 0.8974 | 1.0403 | 1.0114 | 0.8853 | 0.9586 | 0.0393 |
| IQCD       | 1.0309 | 1.0016 | 1.0082 | 0.7938 | 0.9586 | 0.0553 |
| LOC649910  | 0.8777 | 1.1019 | 1.0015 | 0.8534 | 0.9587 | 0.0577 |
| LOC1001321 | 0.8379 | 1.0689 | 1.0263 | 0.9016 | 0.9587 | 0.0537 |
| TFPI2      | 0.9041 | 1.0621 | 1.0416 | 0.8268 | 0.9587 | 0.0562 |
| TM4SF19    | 0.9500 | 1.0531 | 0.9607 | 0.8709 | 0.9587 | 0.0373 |
| LOC652850  | 1.1499 | 1.0460 | 0.8005 | 0.8383 | 0.9587 | 0.0835 |
| FLJ26850   | 0.9019 | 1.0435 | 1.0504 | 0.8388 | 0.9587 | 0.0526 |
| PSMA6      | 0.7826 | 1.2562 | 0.9976 | 0.7984 | 0.9587 | 0.1106 |
| LOC644008  | 0.9171 | 1.1217 | 0.9233 | 0.8727 | 0.9587 | 0.0555 |
| LOC653423  | 0.8938 | 1.0113 | 1.0596 | 0.8700 | 0.9587 | 0.0457 |
| LAT1-3TM   | 0.9190 | 1.0522 | 0.9507 | 0.9129 | 0.9587 | 0.0322 |
| LOC642037  | 0.9128 | 1.0635 | 0.9998 | 0.8587 | 0.9587 | 0.0454 |
| BPGM       | 0.9199 | 1.1296 | 0.9860 | 0.7992 | 0.9587 | 0.0689 |
| LOC1001284 | 0.9888 | 0.9311 | 0.9724 | 0.9425 | 0.9587 | 0.0133 |
| LOC647741  | 0.8497 | 1.0557 | 1.0019 | 0.9275 | 0.9587 | 0.0448 |
| HIST1H2AD  | 0.9289 | 1.0914 | 0.9005 | 0.9140 | 0.9587 | 0.0446 |
| FAM163B    | 0.8499 | 1.0143 | 0.9359 | 1.0349 | 0.9587 | 0.0421 |
| LOC651936  | 0.8549 | 1.0561 | 1.0505 | 0.8734 | 0.9587 | 0.0547 |
| LOC648132  | 0.8765 | 0.9705 | 1.0224 | 0.9655 | 0.9587 | 0.0303 |
| OR6A2      | 0.9323 | 0.9701 | 1.0151 | 0.9174 | 0.9587 | 0.0218 |
| LYSMD3     | 0.8734 | 1.0513 | 1.0654 | 0.8449 | 0.9587 | 0.0579 |
| ERCC-00111 | 0.9026 | 1.1481 | 0.9382 | 0.8460 | 0.9587 | 0.0659 |
| SFI1       | 0.9680 | 0.9323 | 1.0110 | 0.9237 | 0.9587 | 0.0199 |
| GLYCTK     | 0.7854 | 1.0524 | 1.1048 | 0.8923 | 0.9587 | 0.0734 |
| ASB15      | 0.9523 | 0.9772 | 1.0110 | 0.8945 | 0.9587 | 0.0246 |
| LOC390213  | 0.9289 | 0.9599 | 1.0732 | 0.8729 | 0.9587 | 0.0422 |
| LOC647566  | 0.9577 | 1.0163 | 1.0271 | 0.8338 | 0.9587 | 0.0443 |
| LOC729438  | 0.8828 | 1.1112 | 0.9890 | 0.8520 | 0.9588 | 0.0587 |
| ENG        | 0.9705 | 1.0167 | 0.9853 | 0.8624 | 0.9588 | 0.0335 |
| CNTLN      | 0.9802 | 1.1539 | 0.8418 | 0.8591 | 0.9588 | 0.0720 |
| C2orf70    | 0.9073 | 0.9748 | 0.9858 | 0.9671 | 0.9588 | 0.0176 |
| LOC1001292 | 0.8374 | 1.0387 | 1.0235 | 0.9354 | 0.9588 | 0.0464 |
| IFI27      | 0.9451 | 1.1042 | 0.9966 | 0.7892 | 0.9588 | 0.0655 |
| LOC346950  | 0.7029 | 1.0426 | 1.3024 | 0.7871 | 0.9588 | 0.1354 |
| MORC1      | 0.8562 | 1.1102 | 1.0512 | 0.8175 | 0.9588 | 0.0718 |
| OR2T1      | 0.9483 | 1.0374 | 0.9091 | 0.9404 | 0.9588 | 0.0275 |
| FAM49A     | 0.8389 | 1.1577 | 1.0330 | 0.8056 | 0.9588 | 0.0831 |
| LOC643809  | 0.9704 | 1.0750 | 0.8942 | 0.8955 | 0.9588 | 0.0426 |
| POLI       | 0.8680 | 1.0817 | 0.9467 | 0.9388 | 0.9588 | 0.0446 |

|            |        |        |        |        |        |        |
|------------|--------|--------|--------|--------|--------|--------|
| LOC651493  | 0.8580 | 1.0411 | 0.9861 | 0.9500 | 0.9588 | 0.0385 |
| LOC1001342 | 0.9549 | 0.9986 | 1.0077 | 0.8740 | 0.9588 | 0.0305 |
| LOC648921  | 0.9900 | 1.1643 | 0.9293 | 0.7516 | 0.9588 | 0.0851 |
| RBM46      | 0.8928 | 1.1294 | 0.8972 | 0.9159 | 0.9588 | 0.0571 |
| LOC645563  | 0.7617 | 1.1568 | 0.9853 | 0.9315 | 0.9588 | 0.0814 |
| JMJD2C     | 0.8767 | 1.0593 | 0.9420 | 0.9573 | 0.9588 | 0.0378 |
| BTNL8      | 0.8719 | 1.1086 | 0.9464 | 0.9084 | 0.9588 | 0.0522 |
| PDZD11     | 0.8448 | 1.0893 | 1.0077 | 0.8935 | 0.9588 | 0.0553 |
| PFDN2      | 0.8870 | 1.2641 | 0.8824 | 0.8018 | 0.9588 | 0.1036 |
| LOC651122  | 0.9295 | 1.0153 | 1.0126 | 0.8780 | 0.9588 | 0.0335 |
| CROCCL2    | 0.9137 | 0.9532 | 0.9752 | 0.9932 | 0.9588 | 0.0171 |
| ASPRV1     | 0.9416 | 1.0126 | 1.0254 | 0.8557 | 0.9588 | 0.0390 |
| SIGLEC15   | 0.8519 | 1.1058 | 0.8934 | 0.9843 | 0.9588 | 0.0562 |
| OR10K2     | 0.8870 | 1.0533 | 1.0084 | 0.8867 | 0.9588 | 0.0426 |
| ADRBK2     | 0.8938 | 1.0596 | 0.8957 | 0.9863 | 0.9588 | 0.0399 |
| LOC649813  | 0.9415 | 0.9899 | 0.9680 | 0.9361 | 0.9589 | 0.0125 |
| ZNF416     | 0.8733 | 1.1297 | 0.9931 | 0.8393 | 0.9589 | 0.0658 |
| FGF18      | 0.7931 | 1.2662 | 0.9400 | 0.8362 | 0.9589 | 0.1070 |
| COX11      | 0.8863 | 1.0220 | 0.9925 | 0.9346 | 0.9589 | 0.0302 |
| C6orf145   | 0.9594 | 0.9804 | 0.9949 | 0.9008 | 0.9589 | 0.0207 |
| LOC1001296 | 0.9053 | 1.0319 | 0.9793 | 0.9190 | 0.9589 | 0.0292 |
| LOC1001294 | 0.9514 | 1.1427 | 0.9814 | 0.7600 | 0.9589 | 0.0785 |
| HRH3       | 0.9074 | 1.0162 | 1.0569 | 0.8551 | 0.9589 | 0.0468 |
| LOC1001333 | 0.8502 | 0.9919 | 1.0602 | 0.9333 | 0.9589 | 0.0446 |
| OPN1MW     | 0.9083 | 1.0461 | 0.9929 | 0.8883 | 0.9589 | 0.0369 |
| LOC731158  | 0.9453 | 1.0998 | 0.9430 | 0.8475 | 0.9589 | 0.0522 |
| MYH8       | 0.8271 | 1.0237 | 1.0011 | 0.9838 | 0.9589 | 0.0447 |
| LLGL2      | 0.9002 | 1.0676 | 0.9602 | 0.9077 | 0.9589 | 0.0386 |
| LYPD1      | 0.8756 | 1.0793 | 1.0007 | 0.8801 | 0.9589 | 0.0495 |
| PLCL4      | 0.8991 | 1.0731 | 1.0168 | 0.8468 | 0.9589 | 0.0521 |
| GALM       | 1.0229 | 1.1184 | 0.9412 | 0.7532 | 0.9589 | 0.0776 |
| LACRT      | 0.9498 | 0.9833 | 0.9146 | 0.9881 | 0.9589 | 0.0171 |
| LOC389342  | 0.8440 | 1.0770 | 1.0430 | 0.8718 | 0.9589 | 0.0590 |
| ERCC2      | 0.8315 | 1.1780 | 1.0009 | 0.8253 | 0.9589 | 0.0836 |
| LOC642133  | 0.8421 | 1.0719 | 0.9938 | 0.9279 | 0.9589 | 0.0488 |
| LPL        | 0.8279 | 0.9794 | 1.0418 | 0.9867 | 0.9589 | 0.0458 |
| LOC652164  | 0.8447 | 0.9896 | 1.1532 | 0.8483 | 0.9589 | 0.0730 |
| ERCC-00154 | 0.9114 | 1.0238 | 1.0409 | 0.8598 | 0.9589 | 0.0438 |
| LOC284672  | 0.9618 | 0.9877 | 0.9738 | 0.9125 | 0.9590 | 0.0164 |
| LOC651404  | 0.9687 | 0.9489 | 0.9933 | 0.9249 | 0.9590 | 0.0145 |
| MIR592     | 0.9734 | 1.0689 | 0.8645 | 0.9291 | 0.9590 | 0.0429 |
| ABI1       | 0.8316 | 1.1346 | 1.0390 | 0.8306 | 0.9590 | 0.0763 |
| LOC1001282 | 0.8637 | 1.0237 | 1.0020 | 0.9465 | 0.9590 | 0.0357 |
| ALDH3B1    | 0.9273 | 1.0650 | 0.9588 | 0.8848 | 0.9590 | 0.0385 |
| LOC441239  | 0.9258 | 1.0407 | 1.0538 | 0.8155 | 0.9590 | 0.0558 |
| LOC441874  | 0.9620 | 0.9589 | 1.0969 | 0.8181 | 0.9590 | 0.0569 |

|            |        |        |        |        |        |        |
|------------|--------|--------|--------|--------|--------|--------|
| AMD1       | 0.7017 | 1.4367 | 1.0233 | 0.6742 | 0.9590 | 0.1779 |
| NPHS1      | 0.9050 | 0.9510 | 1.0611 | 0.9189 | 0.9590 | 0.0354 |
| REG4       | 0.9374 | 0.9747 | 1.0427 | 0.8811 | 0.9590 | 0.0339 |
| LOC650695  | 0.9061 | 0.9782 | 1.0403 | 0.9114 | 0.9590 | 0.0317 |
| ALDOC      | 0.8324 | 1.3829 | 0.8642 | 0.7564 | 0.9590 | 0.1431 |
| PTPRB      | 0.9314 | 1.1001 | 0.8930 | 0.9114 | 0.9590 | 0.0477 |
| SLC22A7    | 0.9460 | 1.0262 | 0.9703 | 0.8936 | 0.9590 | 0.0275 |
| DEFB130    | 0.9866 | 0.9823 | 0.9598 | 0.9073 | 0.9590 | 0.0182 |
| XAGE5      | 0.9300 | 0.9968 | 1.0065 | 0.9028 | 0.9590 | 0.0253 |
| SLAMF1     | 0.9370 | 0.9963 | 0.9239 | 0.9788 | 0.9590 | 0.0171 |
| KRTAP10-11 | 0.8691 | 1.0349 | 1.1178 | 0.8142 | 0.9590 | 0.0707 |
| SPATA21    | 0.9444 | 1.0253 | 0.9586 | 0.9078 | 0.9590 | 0.0246 |
| LOC439936  | 0.8137 | 1.0850 | 1.0420 | 0.8954 | 0.9590 | 0.0632 |
| SLC13A4    | 0.9522 | 1.0321 | 0.9621 | 0.8898 | 0.9590 | 0.0291 |
| LOC648302  | 0.9763 | 1.0007 | 0.9041 | 0.9549 | 0.9590 | 0.0206 |
| LOC728343  | 0.8887 | 1.0793 | 0.9796 | 0.8886 | 0.9590 | 0.0455 |
| MEPE       | 0.9824 | 0.9189 | 1.0128 | 0.9221 | 0.9590 | 0.0231 |
| LOC727992  | 0.9952 | 0.9523 | 0.9838 | 0.9049 | 0.9590 | 0.0202 |
| LOC731085  | 0.9538 | 1.0121 | 0.9482 | 0.9221 | 0.9591 | 0.0190 |
| LOC441442  | 1.0124 | 1.0127 | 0.9705 | 0.8406 | 0.9591 | 0.0407 |
| LOC1001336 | 0.9413 | 1.1270 | 0.9353 | 0.8327 | 0.9591 | 0.0613 |
| GIP        | 0.9544 | 0.9735 | 1.0629 | 0.8454 | 0.9591 | 0.0446 |
| SSX4B      | 0.9586 | 1.0329 | 0.9375 | 0.9074 | 0.9591 | 0.0267 |
| PM20D2     | 0.8693 | 1.0804 | 1.0238 | 0.8628 | 0.9591 | 0.0549 |
| LOC388526  | 0.9187 | 0.9753 | 0.9742 | 0.9683 | 0.9591 | 0.0136 |
| SERPINC1   | 0.9627 | 1.0557 | 0.8956 | 0.9224 | 0.9591 | 0.0350 |
| LOC651324  | 0.9042 | 1.0285 | 0.9804 | 0.9234 | 0.9591 | 0.0282 |
| LOC644578  | 0.8673 | 0.9668 | 1.0700 | 0.9323 | 0.9591 | 0.0423 |
| C3orf45    | 0.8946 | 0.9945 | 1.0954 | 0.8520 | 0.9591 | 0.0544 |
| FLJ13224   | 0.9360 | 1.1084 | 0.9588 | 0.8332 | 0.9591 | 0.0568 |
| LOC1001314 | 0.9787 | 1.0550 | 0.9888 | 0.8140 | 0.9591 | 0.0512 |
| LOC1001331 | 0.9177 | 1.1163 | 0.9171 | 0.8854 | 0.9591 | 0.0529 |
| LOC400163  | 0.8929 | 1.1069 | 0.9738 | 0.8629 | 0.9591 | 0.0546 |
| LOC1001339 | 0.8823 | 1.0790 | 0.9608 | 0.9145 | 0.9591 | 0.0431 |
| LOC647131  | 1.0032 | 1.0552 | 0.9079 | 0.8703 | 0.9591 | 0.0425 |
| PPBPL2     | 0.8800 | 1.1519 | 0.9620 | 0.8427 | 0.9591 | 0.0689 |
| LOC645012  | 0.8432 | 1.0328 | 1.0559 | 0.9046 | 0.9591 | 0.0510 |
| PPP2CB     | 0.7543 | 1.4045 | 0.9705 | 0.7073 | 0.9591 | 0.1591 |
| FRAS1      | 0.9337 | 1.0527 | 0.9821 | 0.8680 | 0.9592 | 0.0390 |
| LOC1001347 | 0.8505 | 1.1443 | 1.0035 | 0.8383 | 0.9592 | 0.0723 |
| LOC284577  | 0.8939 | 1.1617 | 0.9537 | 0.8275 | 0.9592 | 0.0723 |
| CBFA2T3    | 0.8900 | 1.0249 | 1.0026 | 0.9194 | 0.9592 | 0.0324 |
| ITGA9      | 0.8294 | 1.1148 | 0.9121 | 0.9805 | 0.9592 | 0.0604 |
| LOC644128  | 0.8826 | 1.2082 | 0.9422 | 0.8037 | 0.9592 | 0.0877 |
| LOC440104  | 0.8962 | 1.0048 | 0.9839 | 0.9519 | 0.9592 | 0.0236 |
| KRT85      | 0.9230 | 1.0427 | 1.0260 | 0.8451 | 0.9592 | 0.0463 |

|            |        |        |        |        |        |        |
|------------|--------|--------|--------|--------|--------|--------|
| EMR4       | 0.9261 | 1.0679 | 0.9562 | 0.8867 | 0.9592 | 0.0389 |
| LOC346702  | 0.8541 | 1.1029 | 1.0015 | 0.8784 | 0.9592 | 0.0577 |
| LOC1001290 | 0.8670 | 1.0265 | 1.0265 | 0.9169 | 0.9592 | 0.0402 |
| C5orf56    | 0.8693 | 0.9830 | 1.0543 | 0.9303 | 0.9592 | 0.0393 |
| FAM9C      | 0.9105 | 1.0602 | 0.9573 | 0.9089 | 0.9592 | 0.0355 |
| LOC641744  | 0.9304 | 0.9938 | 0.9955 | 0.9172 | 0.9592 | 0.0206 |
| TRAK1      | 0.8757 | 1.2007 | 0.9067 | 0.8538 | 0.9592 | 0.0812 |
| MYCL1      | 0.9534 | 1.0364 | 0.9704 | 0.8767 | 0.9592 | 0.0328 |
| LOC1001304 | 0.8048 | 1.1802 | 0.9322 | 0.9198 | 0.9592 | 0.0790 |
| LOC644241  | 1.0069 | 0.9380 | 1.0217 | 0.8703 | 0.9592 | 0.0348 |
| OR2G3      | 0.9255 | 0.9579 | 1.0523 | 0.9014 | 0.9593 | 0.0331 |
| LOC648841  | 0.9354 | 0.9875 | 1.0475 | 0.8667 | 0.9593 | 0.0384 |
| OSCAR      | 0.8339 | 1.0937 | 0.9486 | 0.9609 | 0.9593 | 0.0532 |
| ZNF516     | 0.8554 | 1.0699 | 1.0269 | 0.8849 | 0.9593 | 0.0525 |
| XAGE2      | 0.9354 | 1.0473 | 1.0192 | 0.8352 | 0.9593 | 0.0477 |
| LIN28B     | 0.9195 | 1.0683 | 0.9861 | 0.8631 | 0.9593 | 0.0442 |
| C3orf65    | 0.8757 | 0.9528 | 1.0455 | 0.9631 | 0.9593 | 0.0347 |
| C9orf128   | 0.9052 | 0.9904 | 1.0653 | 0.8763 | 0.9593 | 0.0428 |
| LOC729484  | 0.9411 | 0.9759 | 0.9614 | 0.9587 | 0.9593 | 0.0071 |
| LOC653451  | 0.9861 | 1.0330 | 0.9805 | 0.8375 | 0.9593 | 0.0423 |
| ARL4D      | 0.9426 | 1.0036 | 0.9873 | 0.9037 | 0.9593 | 0.0226 |
| KCMF1      | 1.0140 | 1.0443 | 0.8939 | 0.8850 | 0.9593 | 0.0409 |
| LOC642106  | 0.8258 | 1.0659 | 0.9629 | 0.9826 | 0.9593 | 0.0498 |
| FAM171B    | 0.9470 | 1.1135 | 0.8832 | 0.8935 | 0.9593 | 0.0533 |
| PEX26      | 0.9015 | 1.1507 | 0.9411 | 0.8439 | 0.9593 | 0.0669 |
| NKG7       | 0.8594 | 1.1048 | 0.9675 | 0.9056 | 0.9593 | 0.0533 |
| LOC1001312 | 0.9679 | 1.0294 | 1.0079 | 0.8321 | 0.9593 | 0.0443 |
| SNORA72    | 0.8802 | 1.0643 | 0.9828 | 0.9100 | 0.9593 | 0.0411 |
| LOC1001317 | 0.9440 | 1.0355 | 1.0414 | 0.8164 | 0.9593 | 0.0526 |
| C1orf113   | 0.9267 | 0.9836 | 0.9732 | 0.9538 | 0.9593 | 0.0125 |
| LOC728613  | 0.9058 | 1.0851 | 1.0173 | 0.8292 | 0.9593 | 0.0570 |
| LOC727948  | 0.9057 | 1.0750 | 0.9893 | 0.8673 | 0.9594 | 0.0462 |
| MIR203     | 0.9041 | 1.0543 | 0.9398 | 0.9392 | 0.9594 | 0.0327 |
| LOC440970  | 0.8584 | 1.1013 | 0.9950 | 0.8828 | 0.9594 | 0.0559 |
| LOC732229  | 0.8417 | 1.0227 | 1.0668 | 0.9063 | 0.9594 | 0.0518 |
| FLNC       | 0.9935 | 1.0460 | 0.9169 | 0.8812 | 0.9594 | 0.0372 |
| SERPINA13  | 0.9405 | 1.0248 | 1.0184 | 0.8539 | 0.9594 | 0.0400 |
| NDUFC1     | 0.9269 | 1.1641 | 1.0617 | 0.6848 | 0.9594 | 0.1036 |
| TUBGCP3    | 0.9330 | 0.9070 | 1.0684 | 0.9292 | 0.9594 | 0.0368 |
| C1orf117   | 0.8640 | 1.0867 | 0.9911 | 0.8958 | 0.9594 | 0.0503 |
| LOC647046  | 0.9002 | 1.0223 | 0.9603 | 0.9549 | 0.9594 | 0.0250 |
| DKFZp761O2 | 0.9727 | 1.0338 | 0.9368 | 0.8945 | 0.9594 | 0.0295 |
| WDTC1      | 0.8999 | 1.0498 | 1.0082 | 0.8798 | 0.9594 | 0.0413 |
| LOC650898  | 0.8961 | 1.0732 | 0.9544 | 0.9140 | 0.9594 | 0.0398 |
| PRRX1      | 0.8962 | 1.0282 | 0.9771 | 0.9363 | 0.9595 | 0.0282 |
| LOC642464  | 0.9254 | 1.0916 | 0.9587 | 0.8622 | 0.9595 | 0.0484 |

|            |        |        |        |        |        |        |
|------------|--------|--------|--------|--------|--------|--------|
| C10orf114  | 0.8955 | 1.0587 | 1.0208 | 0.8629 | 0.9595 | 0.0475 |
| LOC646720  | 1.0017 | 1.0537 | 0.9443 | 0.8382 | 0.9595 | 0.0462 |
| LOC653127  | 0.9040 | 1.0949 | 1.0137 | 0.8254 | 0.9595 | 0.0594 |
| LOC144438  | 0.8456 | 1.1549 | 1.0569 | 0.7805 | 0.9595 | 0.0879 |
| LOC729238  | 0.9582 | 1.0024 | 1.0214 | 0.8559 | 0.9595 | 0.0370 |
| TRIM31     | 0.9169 | 1.1457 | 1.0143 | 0.7611 | 0.9595 | 0.0811 |
| GSDMA      | 0.9494 | 1.0987 | 0.9758 | 0.8141 | 0.9595 | 0.0584 |
| LOC1001328 | 0.8467 | 1.0837 | 0.9941 | 0.9134 | 0.9595 | 0.0512 |
| TPM4       | 0.7875 | 1.3152 | 0.8740 | 0.8613 | 0.9595 | 0.1201 |
| LOC1001312 | 0.9276 | 1.0142 | 1.0517 | 0.8445 | 0.9595 | 0.0463 |
| LOC652203  | 0.8840 | 1.0616 | 1.0175 | 0.8750 | 0.9595 | 0.0471 |
| EDNRB      | 0.9261 | 1.0374 | 1.0003 | 0.8743 | 0.9595 | 0.0366 |
| LSP1       | 0.9519 | 1.0464 | 1.0495 | 0.7903 | 0.9595 | 0.0608 |
| LOC641802  | 0.8796 | 1.1491 | 0.8733 | 0.9362 | 0.9595 | 0.0647 |
| CYCSP52    | 0.8747 | 1.1046 | 0.9237 | 0.9351 | 0.9595 | 0.0501 |
| ZNF354A    | 0.8976 | 1.0167 | 0.9976 | 0.9263 | 0.9595 | 0.0284 |
| LOC219347  | 0.9008 | 1.0626 | 0.9857 | 0.8891 | 0.9595 | 0.0405 |
| LOC401218  | 0.8915 | 1.2872 | 0.8792 | 0.7803 | 0.9595 | 0.1120 |
| ZNF41      | 0.8839 | 1.0546 | 1.0368 | 0.8630 | 0.9596 | 0.0500 |
| C17orf38   | 0.9743 | 1.1027 | 0.9074 | 0.8539 | 0.9596 | 0.0537 |
| LOC645958  | 0.9659 | 0.9637 | 1.0647 | 0.8440 | 0.9596 | 0.0452 |
| LOC651390  | 0.9271 | 1.1484 | 0.9357 | 0.8271 | 0.9596 | 0.0676 |
| SLC6A6     | 0.8050 | 1.0742 | 0.9497 | 1.0094 | 0.9596 | 0.0574 |
| ATR        | 0.8396 | 1.0350 | 1.0221 | 0.9416 | 0.9596 | 0.0450 |
| LOC1001301 | 0.9006 | 1.0519 | 0.9952 | 0.8906 | 0.9596 | 0.0388 |
| EVI1       | 0.7773 | 1.2104 | 0.8961 | 0.9545 | 0.9596 | 0.0914 |
| SNORD28    | 0.9744 | 0.9650 | 1.0335 | 0.8655 | 0.9596 | 0.0348 |
| LGI1       | 0.9167 | 1.0398 | 1.0162 | 0.8658 | 0.9596 | 0.0411 |
| MIR640     | 0.8510 | 0.9467 | 1.0717 | 0.9691 | 0.9596 | 0.0453 |
| LOC730005  | 0.9548 | 0.9795 | 1.0201 | 0.8840 | 0.9596 | 0.0286 |
| IFNA16     | 0.9028 | 0.9501 | 1.0453 | 0.9404 | 0.9596 | 0.0303 |
| SH3RF2     | 0.8407 | 1.0202 | 1.0194 | 0.9583 | 0.9596 | 0.0422 |
| EEF1B2     | 0.7580 | 1.2705 | 1.0747 | 0.7353 | 0.9596 | 0.1294 |
| OSBPL7     | 0.8794 | 1.0671 | 1.0774 | 0.8147 | 0.9596 | 0.0664 |
| FLJ11292   | 0.8426 | 1.0248 | 1.0460 | 0.9252 | 0.9596 | 0.0471 |
| GGA1       | 0.7811 | 1.1658 | 1.0541 | 0.8375 | 0.9596 | 0.0905 |
| LOC731932  | 0.9159 | 1.0452 | 0.9800 | 0.8975 | 0.9597 | 0.0336 |
| C19orf44   | 0.8854 | 1.1196 | 1.0044 | 0.8292 | 0.9597 | 0.0646 |
| LOC729492  | 0.8841 | 1.0848 | 0.9472 | 0.9225 | 0.9597 | 0.0437 |
| GPR116     | 0.9300 | 1.0208 | 0.9516 | 0.9362 | 0.9597 | 0.0209 |
| PDE1C      | 0.9970 | 0.9818 | 1.0502 | 0.8098 | 0.9597 | 0.0521 |
| LOC1001342 | 0.9623 | 1.0451 | 1.0039 | 0.8273 | 0.9597 | 0.0472 |
| ADAM28     | 0.9144 | 1.0943 | 0.9709 | 0.8590 | 0.9597 | 0.0504 |
| LOC652571  | 1.0636 | 0.9391 | 0.8648 | 0.9712 | 0.9597 | 0.0412 |
| LOC652594  | 0.8459 | 1.0093 | 1.1117 | 0.8718 | 0.9597 | 0.0621 |
| WFDC5      | 0.9204 | 1.0734 | 0.9989 | 0.8460 | 0.9597 | 0.0491 |



|            |        |        |        |        |        |        |
|------------|--------|--------|--------|--------|--------|--------|
| PSORS1C2   | 0.9284 | 1.0868 | 0.9437 | 0.8799 | 0.9597 | 0.0445 |
| NINJ2      | 0.9208 | 0.9805 | 1.0356 | 0.9019 | 0.9597 | 0.0304 |
| KCNK4      | 0.8898 | 1.1062 | 1.0294 | 0.8133 | 0.9597 | 0.0662 |
| RNF207     | 0.8380 | 1.2501 | 0.8358 | 0.9149 | 0.9597 | 0.0985 |
| SCARNA4    | 0.8891 | 1.0882 | 0.9998 | 0.8618 | 0.9597 | 0.0522 |
| LOC646437  | 0.9513 | 1.0619 | 1.0100 | 0.8156 | 0.9597 | 0.0531 |
| LOC1001343 | 0.8673 | 1.0351 | 0.9705 | 0.9660 | 0.9597 | 0.0346 |
| TBC1D1     | 0.8540 | 1.1796 | 0.9994 | 0.8059 | 0.9597 | 0.0840 |
| MIR29A     | 0.8783 | 1.0161 | 1.0794 | 0.8651 | 0.9597 | 0.0525 |
| LOC1001292 | 0.9074 | 0.9907 | 0.9978 | 0.9430 | 0.9597 | 0.0213 |
| IL3        | 0.9192 | 1.0331 | 0.9467 | 0.9399 | 0.9597 | 0.0251 |
| FAM59B     | 0.9276 | 1.0742 | 0.8889 | 0.9483 | 0.9597 | 0.0401 |
| EIF1AD     | 0.8475 | 1.0839 | 1.0255 | 0.8821 | 0.9597 | 0.0566 |
| GPRC5A     | 0.9733 | 1.0260 | 1.0027 | 0.8370 | 0.9597 | 0.0423 |
| SDHC       | 0.8156 | 1.3977 | 0.8721 | 0.7535 | 0.9597 | 0.1480 |
| LOC1001282 | 0.8314 | 1.0726 | 1.1423 | 0.7926 | 0.9597 | 0.0868 |
| LOC440896  | 0.8584 | 1.0898 | 1.0248 | 0.8660 | 0.9597 | 0.0579 |
| LOC1001282 | 0.9189 | 1.0139 | 0.9590 | 0.9471 | 0.9597 | 0.0199 |
| SETD4      | 0.9229 | 1.0922 | 0.9597 | 0.8642 | 0.9598 | 0.0483 |
| COL11A1    | 0.9142 | 1.0996 | 0.9483 | 0.8769 | 0.9598 | 0.0488 |
| TCBA1      | 0.8790 | 1.0867 | 0.9191 | 0.9544 | 0.9598 | 0.0450 |
| C9orf131   | 0.9382 | 1.0735 | 0.9394 | 0.8880 | 0.9598 | 0.0398 |
| MGC57359   | 0.8717 | 1.0473 | 1.0347 | 0.8855 | 0.9598 | 0.0470 |
| SCYL2      | 0.9611 | 1.2391 | 1.0217 | 0.6172 | 0.9598 | 0.1288 |
| LOC554223  | 0.9266 | 1.0541 | 1.0048 | 0.8536 | 0.9598 | 0.0441 |
| DUSP19     | 0.6881 | 1.2340 | 1.1385 | 0.7785 | 0.9598 | 0.1335 |
| LOC442319  | 0.9534 | 1.0383 | 0.9024 | 0.9450 | 0.9598 | 0.0284 |
| LOC643913  | 0.9111 | 1.1329 | 1.0456 | 0.7495 | 0.9598 | 0.0836 |
| PDE7A      | 0.8634 | 1.0983 | 1.0620 | 0.8155 | 0.9598 | 0.0706 |
| OSBPL8     | 0.6495 | 1.3239 | 1.2566 | 0.6092 | 0.9598 | 0.1915 |
| MOBP       | 0.8820 | 1.0386 | 1.0013 | 0.9173 | 0.9598 | 0.0363 |
| LOC643767  | 0.8828 | 1.0124 | 1.1032 | 0.8407 | 0.9598 | 0.0602 |
| RASSF4     | 0.8608 | 1.0900 | 0.9484 | 0.9401 | 0.9598 | 0.0477 |
| RGNEF      | 0.9423 | 1.0550 | 0.9816 | 0.8604 | 0.9598 | 0.0405 |
| SSX9       | 0.9073 | 1.0397 | 1.0002 | 0.8921 | 0.9598 | 0.0358 |
| REXO1L3P   | 0.9822 | 0.9735 | 0.9839 | 0.8996 | 0.9598 | 0.0202 |
| ROCK1      | 0.8603 | 1.0799 | 1.1093 | 0.7897 | 0.9598 | 0.0794 |
| LOC646066  | 0.8727 | 1.0237 | 1.0694 | 0.8735 | 0.9598 | 0.0509 |
| LOC1001305 | 0.8917 | 1.1232 | 0.9384 | 0.8859 | 0.9598 | 0.0557 |
| LOC651401  | 0.8912 | 1.1048 | 1.0189 | 0.8245 | 0.9598 | 0.0629 |
| LOC400793  | 0.8065 | 1.0909 | 1.0241 | 0.9178 | 0.9598 | 0.0623 |
| LOC645029  | 0.8929 | 1.1003 | 0.9529 | 0.8931 | 0.9598 | 0.0489 |
| C11orf53   | 0.8960 | 1.0536 | 1.0089 | 0.8809 | 0.9598 | 0.0423 |
| MIST       | 0.9338 | 1.0444 | 0.9451 | 0.9161 | 0.9598 | 0.0288 |
| DMGDH      | 0.9681 | 0.9955 | 1.0087 | 0.8671 | 0.9599 | 0.0321 |
| MT4        | 0.8958 | 0.9984 | 1.0953 | 0.8499 | 0.9599 | 0.0548 |

|            |        |        |        |        |        |        |
|------------|--------|--------|--------|--------|--------|--------|
| LOC647649  | 0.8963 | 1.1139 | 1.0389 | 0.7903 | 0.9599 | 0.0723 |
| CLDN10     | 0.9184 | 1.0819 | 0.9956 | 0.8436 | 0.9599 | 0.0512 |
| LOC1001307 | 0.9581 | 1.0080 | 0.8849 | 0.9885 | 0.9599 | 0.0270 |
| BTNL2      | 0.9388 | 1.0976 | 0.9028 | 0.9001 | 0.9599 | 0.0468 |
| LOC650465  | 0.8840 | 1.0936 | 1.0060 | 0.8558 | 0.9599 | 0.0552 |
| EXOC2      | 0.8713 | 1.1192 | 1.0031 | 0.8459 | 0.9599 | 0.0633 |
| VWA3B      | 0.8032 | 1.1197 | 0.9756 | 0.9410 | 0.9599 | 0.0650 |
| SLC6A17    | 0.8880 | 1.0838 | 0.9965 | 0.8712 | 0.9599 | 0.0498 |
| N4BP2L1    | 0.9349 | 0.9736 | 1.0467 | 0.8843 | 0.9599 | 0.0342 |
| LOC653149  | 0.8528 | 1.1658 | 0.9302 | 0.8908 | 0.9599 | 0.0704 |
| LOC649509  | 0.8117 | 1.0843 | 1.1270 | 0.8165 | 0.9599 | 0.0846 |
| LOC91561   | 0.8996 | 1.0702 | 1.0836 | 0.7862 | 0.9599 | 0.0715 |
| RAX        | 1.0037 | 1.0031 | 0.9846 | 0.8480 | 0.9599 | 0.0375 |
| SLC35F3    | 0.9325 | 1.0172 | 0.9906 | 0.8992 | 0.9599 | 0.0269 |
| LOC201651  | 0.9380 | 1.0304 | 0.9761 | 0.8951 | 0.9599 | 0.0287 |
| LOC644479  | 0.9977 | 0.9692 | 1.0056 | 0.8671 | 0.9599 | 0.0319 |
| LOC1001316 | 0.7933 | 1.1517 | 1.0155 | 0.8792 | 0.9599 | 0.0786 |
| LOC148766  | 0.9581 | 1.0531 | 0.9873 | 0.8411 | 0.9599 | 0.0443 |
| LOC649425  | 0.9982 | 0.9475 | 1.0140 | 0.8799 | 0.9599 | 0.0302 |
| LOC1001339 | 1.0137 | 0.9848 | 0.9990 | 0.8421 | 0.9599 | 0.0397 |
| TIGD2      | 0.7787 | 1.2603 | 0.9633 | 0.8373 | 0.9599 | 0.1073 |
| LOC121456  | 0.8174 | 1.0555 | 1.0974 | 0.8694 | 0.9599 | 0.0686 |
| LOC649063  | 0.8555 | 1.0773 | 1.0088 | 0.8981 | 0.9599 | 0.0508 |
| LOC652350  | 0.8247 | 1.1615 | 0.9831 | 0.8705 | 0.9599 | 0.0750 |
| CHST6      | 0.9764 | 1.0931 | 0.8934 | 0.8767 | 0.9599 | 0.0495 |
| ZNF740     | 0.9399 | 1.0203 | 1.0420 | 0.8375 | 0.9599 | 0.0463 |
| LOC646780  | 0.9395 | 0.8741 | 1.0825 | 0.9436 | 0.9599 | 0.0438 |
| F3         | 0.8972 | 1.0183 | 1.0268 | 0.8976 | 0.9600 | 0.0362 |
| LOC392506  | 0.9125 | 1.0752 | 0.9777 | 0.8745 | 0.9600 | 0.0439 |
| MAG        | 0.9512 | 1.0382 | 0.9745 | 0.8761 | 0.9600 | 0.0335 |
| SOX30      | 0.8583 | 0.9858 | 1.0404 | 0.9554 | 0.9600 | 0.0382 |
| OOEP       | 0.8270 | 1.1363 | 0.9102 | 0.9664 | 0.9600 | 0.0654 |
| GKN1       | 0.8368 | 1.0617 | 0.9980 | 0.9435 | 0.9600 | 0.0476 |
| ZNF878     | 0.9311 | 1.0296 | 0.9466 | 0.9329 | 0.9600 | 0.0234 |
| TNNI3K     | 0.8183 | 1.0689 | 1.0116 | 0.9413 | 0.9600 | 0.0540 |
| FHIT       | 0.9159 | 1.0258 | 1.0269 | 0.8716 | 0.9600 | 0.0393 |
| MTTP       | 0.9107 | 1.0358 | 1.0444 | 0.8492 | 0.9600 | 0.0479 |
| CAMK1D     | 0.9325 | 1.0577 | 0.9472 | 0.9028 | 0.9600 | 0.0338 |
| BOLL       | 0.9156 | 1.0286 | 0.9733 | 0.9227 | 0.9600 | 0.0262 |
| PSG8       | 0.9437 | 1.0415 | 0.9624 | 0.8926 | 0.9600 | 0.0309 |
| LOC651951  | 0.9338 | 1.1027 | 0.9317 | 0.8719 | 0.9600 | 0.0497 |
| LOC653463  | 0.8690 | 1.0574 | 0.9746 | 0.9393 | 0.9601 | 0.0392 |
| NLGN4Y     | 0.9978 | 1.0505 | 0.9821 | 0.8099 | 0.9601 | 0.0521 |
| IMPA1      | 0.8250 | 1.2105 | 1.1471 | 0.6576 | 0.9601 | 0.1315 |
| VANGL1     | 0.7759 | 1.1641 | 1.0707 | 0.8295 | 0.9601 | 0.0935 |
| IQSEC2     | 1.0705 | 1.0208 | 0.9617 | 0.7872 | 0.9601 | 0.0618 |

|            |        |        |        |        |        |        |
|------------|--------|--------|--------|--------|--------|--------|
| MIR30C1    | 0.9243 | 0.9694 | 1.0212 | 0.9255 | 0.9601 | 0.0229 |
| OR5H1      | 0.8897 | 0.9601 | 0.9981 | 0.9924 | 0.9601 | 0.0249 |
| KIAA1609   | 0.9667 | 1.0365 | 0.9790 | 0.8582 | 0.9601 | 0.0372 |
| LOC1001309 | 0.8736 | 1.0128 | 1.0618 | 0.8922 | 0.9601 | 0.0458 |
| HOXB3      | 0.8751 | 1.1737 | 0.9839 | 0.8077 | 0.9601 | 0.0799 |
| AMZ1       | 0.9083 | 1.1292 | 0.9285 | 0.8745 | 0.9601 | 0.0574 |
| LOC729059  | 0.9649 | 1.0446 | 0.9824 | 0.8484 | 0.9601 | 0.0410 |
| KCNA7      | 0.8651 | 1.1738 | 0.9245 | 0.8770 | 0.9601 | 0.0724 |
| LOC1001318 | 0.8985 | 0.9686 | 1.0009 | 0.9725 | 0.9601 | 0.0218 |
| LOC647366  | 0.9907 | 1.0655 | 0.9603 | 0.8240 | 0.9601 | 0.0505 |
| LOC440296  | 0.7878 | 0.9860 | 1.0893 | 0.9774 | 0.9601 | 0.0628 |
| COL28      | 0.9185 | 0.9283 | 1.0552 | 0.9386 | 0.9601 | 0.0320 |
| LOC285804  | 0.8990 | 1.0719 | 0.9839 | 0.8857 | 0.9601 | 0.0431 |
| LOC1001291 | 0.8839 | 1.1152 | 0.9927 | 0.8487 | 0.9602 | 0.0601 |
| LOC652127  | 0.9336 | 1.0206 | 1.0893 | 0.7971 | 0.9602 | 0.0630 |
| LOC650463  | 0.8312 | 1.0046 | 1.0179 | 0.9868 | 0.9602 | 0.0434 |
| LOC339192  | 0.8772 | 1.0525 | 0.9955 | 0.9155 | 0.9602 | 0.0394 |
| GPBAR1     | 0.9084 | 0.9878 | 1.0466 | 0.8979 | 0.9602 | 0.0351 |
| TFR2       | 0.9272 | 1.0726 | 0.8728 | 0.9680 | 0.9602 | 0.0423 |
| TEX13B     | 0.9670 | 1.0897 | 0.9250 | 0.8590 | 0.9602 | 0.0486 |
| LOC648399  | 0.8058 | 1.0499 | 1.0329 | 0.9523 | 0.9602 | 0.0557 |
| SMEK2      | 0.8211 | 1.0910 | 1.2109 | 0.7178 | 0.9602 | 0.1148 |
| KRTAP7-1   | 0.9400 | 0.9347 | 1.0687 | 0.8974 | 0.9602 | 0.0374 |
| H2AFB1     | 0.9280 | 1.0798 | 1.0249 | 0.8081 | 0.9602 | 0.0596 |
| INE2       | 0.8436 | 0.9789 | 0.9826 | 1.0358 | 0.9602 | 0.0410 |
| LOC1001283 | 0.9272 | 1.0988 | 0.8835 | 0.9314 | 0.9602 | 0.0474 |
| LOC401648  | 0.8724 | 1.0726 | 0.9790 | 0.9168 | 0.9602 | 0.0434 |
| LMOD2      | 0.9119 | 1.0228 | 1.0248 | 0.8813 | 0.9602 | 0.0373 |
| FAM178A    | 0.9392 | 1.0555 | 0.9843 | 0.8619 | 0.9602 | 0.0406 |
| PLN        | 0.8870 | 1.0911 | 1.0221 | 0.8407 | 0.9602 | 0.0582 |
| LOC1001336 | 0.6525 | 1.3509 | 1.0824 | 0.7551 | 0.9602 | 0.1592 |
| PRSS16     | 0.9073 | 1.2338 | 0.8720 | 0.8279 | 0.9602 | 0.0926 |
| OR1J4      | 0.8284 | 1.1253 | 0.9493 | 0.9379 | 0.9602 | 0.0614 |
| GGT8P      | 0.8637 | 1.0538 | 1.0628 | 0.8606 | 0.9602 | 0.0567 |
| LOC389631  | 0.8923 | 1.0986 | 1.0217 | 0.8283 | 0.9602 | 0.0612 |
| LOC649340  | 1.0093 | 1.0636 | 0.8911 | 0.8770 | 0.9602 | 0.0455 |
| LOC1001323 | 0.9092 | 1.0235 | 1.0324 | 0.8760 | 0.9602 | 0.0397 |
| LOC653729  | 0.8677 | 1.0163 | 1.0389 | 0.9181 | 0.9602 | 0.0405 |
| ODF4       | 0.8679 | 0.9920 | 1.0336 | 0.9475 | 0.9603 | 0.0354 |
| C21orf87   | 0.9228 | 1.0677 | 0.9770 | 0.8736 | 0.9603 | 0.0416 |
| ACSM2B     | 0.8834 | 0.9676 | 1.0286 | 0.9614 | 0.9603 | 0.0298 |
| OPRL1      | 0.9182 | 1.1452 | 0.9300 | 0.8477 | 0.9603 | 0.0643 |
| NUDT10     | 0.9322 | 1.0181 | 0.9728 | 0.9179 | 0.9603 | 0.0225 |
| SP140L     | 0.8541 | 1.0257 | 1.0637 | 0.8976 | 0.9603 | 0.0501 |
| SYT14L     | 0.8548 | 1.0747 | 1.0566 | 0.8550 | 0.9603 | 0.0609 |
| LOC644227  | 0.9596 | 1.0425 | 0.9845 | 0.8546 | 0.9603 | 0.0393 |

|            |        |        |        |        |        |        |
|------------|--------|--------|--------|--------|--------|--------|
| LOC441546  | 0.9237 | 0.9592 | 0.9858 | 0.9724 | 0.9603 | 0.0133 |
| BHMT2      | 0.9747 | 0.9884 | 0.9547 | 0.9233 | 0.9603 | 0.0141 |
| LOC649198  | 0.9106 | 1.0508 | 0.9399 | 0.9398 | 0.9603 | 0.0310 |
| LOC1001302 | 0.9245 | 1.0396 | 0.9969 | 0.8801 | 0.9603 | 0.0358 |
| ZNF597     | 0.7933 | 1.1327 | 1.0032 | 0.9120 | 0.9603 | 0.0718 |
| FAM75A2    | 0.9799 | 1.0646 | 0.9214 | 0.8754 | 0.9603 | 0.0408 |
| LOC649584  | 0.8616 | 1.0576 | 0.9366 | 0.9854 | 0.9603 | 0.0412 |
| GLIS3      | 0.9184 | 1.0320 | 0.9896 | 0.9013 | 0.9603 | 0.0306 |
| LOC651044  | 0.9344 | 0.9827 | 1.0248 | 0.8994 | 0.9603 | 0.0275 |
| PHF5A      | 0.7520 | 1.3913 | 0.9264 | 0.7715 | 0.9603 | 0.1489 |
| NFIC       | 0.8552 | 1.1547 | 1.0117 | 0.8197 | 0.9603 | 0.0771 |
| LOC645757  | 0.8890 | 1.0127 | 1.0403 | 0.8992 | 0.9603 | 0.0387 |
| SPACA1     | 0.9106 | 1.0553 | 1.0276 | 0.8477 | 0.9603 | 0.0489 |
| LOC729891  | 0.8463 | 1.0528 | 1.0784 | 0.8638 | 0.9603 | 0.0611 |
| PCOTH      | 1.0187 | 1.0352 | 0.9295 | 0.8580 | 0.9603 | 0.0413 |
| KIAA0649   | 0.9330 | 1.2797 | 0.7748 | 0.8540 | 0.9603 | 0.1112 |
| CST1       | 0.8829 | 1.0931 | 0.9315 | 0.9340 | 0.9604 | 0.0458 |
| CPN2       | 0.9126 | 1.0654 | 1.0656 | 0.7979 | 0.9604 | 0.0651 |
| WBSCR19    | 0.8470 | 1.1086 | 0.9913 | 0.8946 | 0.9604 | 0.0578 |
| ADAM30     | 0.9001 | 0.9760 | 1.0453 | 0.9201 | 0.9604 | 0.0325 |
| LOC729314  | 0.9608 | 1.0822 | 0.9724 | 0.8261 | 0.9604 | 0.0525 |
| LOC1001324 | 1.0529 | 0.9325 | 1.0164 | 0.8396 | 0.9604 | 0.0475 |
| SP3        | 0.9583 | 1.0565 | 1.0986 | 0.7280 | 0.9604 | 0.0828 |
| LOC1001285 | 0.9456 | 1.0560 | 0.9597 | 0.8801 | 0.9604 | 0.0363 |
| DNAH12L    | 0.9778 | 1.0243 | 0.9233 | 0.9160 | 0.9604 | 0.0254 |
| MN1        | 0.9322 | 1.0450 | 0.9955 | 0.8688 | 0.9604 | 0.0383 |
| TEKT3      | 0.8925 | 1.0797 | 0.9704 | 0.8989 | 0.9604 | 0.0435 |
| NY-REN-7   | 0.9394 | 1.0413 | 0.9823 | 0.8786 | 0.9604 | 0.0343 |
| DKFZp451M2 | 0.9251 | 1.1466 | 0.9324 | 0.8374 | 0.9604 | 0.0657 |
| LOC389827  | 0.8550 | 1.1285 | 0.9890 | 0.8689 | 0.9604 | 0.0636 |
| MAGEB10    | 0.9087 | 1.0159 | 0.9926 | 0.9243 | 0.9604 | 0.0260 |
| FSTL5      | 0.9904 | 1.0218 | 0.9300 | 0.8995 | 0.9604 | 0.0278 |
| HLA-DRB5   | 0.8651 | 1.0568 | 1.0284 | 0.8912 | 0.9604 | 0.0481 |
| CIITA      | 0.9329 | 1.0069 | 1.0460 | 0.8557 | 0.9604 | 0.0420 |
| LOC648240  | 0.9089 | 1.0751 | 0.9586 | 0.8990 | 0.9604 | 0.0404 |
| WIF1       | 0.9407 | 1.0796 | 0.9910 | 0.8303 | 0.9604 | 0.0520 |
| FBXO43     | 0.9227 | 1.0275 | 1.0265 | 0.8648 | 0.9604 | 0.0402 |
| LOC401934  | 0.8932 | 1.0503 | 0.9266 | 0.9716 | 0.9604 | 0.0340 |
| LOC651186  | 0.8926 | 1.0752 | 0.9775 | 0.8963 | 0.9604 | 0.0430 |
| C2orf42    | 0.9146 | 1.1533 | 1.0037 | 0.7701 | 0.9604 | 0.0803 |
| FLJ45300   | 0.9908 | 1.0735 | 0.9390 | 0.8384 | 0.9604 | 0.0492 |
| PPIE       | 0.7643 | 1.3734 | 0.9594 | 0.7446 | 0.9604 | 0.1460 |
| NPAS4      | 0.9606 | 1.0963 | 0.9645 | 0.8203 | 0.9604 | 0.0564 |
| LOC641987  | 0.9155 | 1.0480 | 1.0517 | 0.8266 | 0.9604 | 0.0547 |
| MIR548H1   | 0.9696 | 0.9876 | 0.9383 | 0.9462 | 0.9604 | 0.0112 |
| LOC652404  | 0.9547 | 1.0548 | 1.0565 | 0.7757 | 0.9604 | 0.0660 |

|            |        |        |        |        |        |        |
|------------|--------|--------|--------|--------|--------|--------|
| FOXN3      | 0.9417 | 1.0378 | 0.9919 | 0.8703 | 0.9604 | 0.0359 |
| LOC389901  | 0.8082 | 1.1373 | 1.0993 | 0.7970 | 0.9604 | 0.0915 |
| FAM90A12   | 0.9728 | 1.0924 | 0.8843 | 0.8925 | 0.9605 | 0.0483 |
| OR11H6     | 0.9109 | 1.0835 | 1.0421 | 0.8054 | 0.9605 | 0.0634 |
| COL2A1     | 0.9088 | 1.0633 | 0.9757 | 0.8941 | 0.9605 | 0.0386 |
| LOC643660  | 0.8546 | 1.0322 | 1.0298 | 0.9253 | 0.9605 | 0.0432 |
| KCNQ2      | 0.8740 | 1.0765 | 0.9910 | 0.9004 | 0.9605 | 0.0461 |
| HNMT       | 0.9271 | 1.0071 | 0.9904 | 0.9173 | 0.9605 | 0.0225 |
| SPATA3     | 0.8781 | 1.0998 | 0.9842 | 0.8799 | 0.9605 | 0.0526 |
| LOC1001312 | 0.8092 | 1.0570 | 0.9817 | 0.9940 | 0.9605 | 0.0531 |
| CRHBP      | 0.9095 | 1.0012 | 1.0449 | 0.8864 | 0.9605 | 0.0375 |
| LOC1001321 | 0.9939 | 1.0042 | 0.9225 | 0.9214 | 0.9605 | 0.0224 |
| LOC651231  | 0.9857 | 1.0391 | 0.9826 | 0.8346 | 0.9605 | 0.0439 |
| TFDP3      | 0.8689 | 1.0032 | 0.9906 | 0.9793 | 0.9605 | 0.0309 |
| LOC650822  | 0.9448 | 1.0094 | 1.0832 | 0.8046 | 0.9605 | 0.0592 |
| ELA1       | 0.9691 | 0.9729 | 0.9610 | 0.9390 | 0.9605 | 0.0076 |
| ZNF341     | 0.8263 | 1.2255 | 0.9779 | 0.8123 | 0.9605 | 0.0960 |
| PAIP1      | 0.9985 | 1.1067 | 0.9456 | 0.7913 | 0.9605 | 0.0656 |
| LOC644091  | 0.8931 | 1.2113 | 1.0939 | 0.6438 | 0.9605 | 0.1243 |
| LOC1001324 | 0.9501 | 1.0329 | 0.9627 | 0.8964 | 0.9605 | 0.0281 |
| KIAA0748   | 0.9434 | 1.1367 | 0.8727 | 0.8892 | 0.9605 | 0.0606 |
| LOC648590  | 0.9054 | 1.1046 | 0.9721 | 0.8601 | 0.9605 | 0.0532 |
| C2orf90    | 0.9025 | 0.9653 | 1.0256 | 0.9488 | 0.9605 | 0.0254 |
| MIR924     | 0.9350 | 1.0531 | 0.9992 | 0.8548 | 0.9605 | 0.0427 |
| ZNF202     | 0.8316 | 1.2266 | 0.8938 | 0.8900 | 0.9605 | 0.0898 |
| RORB       | 0.9470 | 1.0692 | 0.9766 | 0.8493 | 0.9605 | 0.0453 |
| AMY2A      | 0.9146 | 1.0921 | 1.0217 | 0.8138 | 0.9605 | 0.0610 |
| RAC2       | 0.8640 | 1.0802 | 0.9989 | 0.8991 | 0.9605 | 0.0491 |
| NOS2A      | 0.9094 | 1.0872 | 0.9731 | 0.8725 | 0.9605 | 0.0471 |
| LOC647993  | 0.8992 | 1.0831 | 1.0074 | 0.8525 | 0.9606 | 0.0522 |
| LOC729197  | 0.9505 | 1.0359 | 0.9644 | 0.8914 | 0.9606 | 0.0297 |
| LOC1001325 | 0.8827 | 1.1369 | 0.9457 | 0.8769 | 0.9606 | 0.0608 |
| RNF138P1   | 0.9311 | 1.0298 | 0.9942 | 0.8872 | 0.9606 | 0.0319 |
| ADAM19     | 0.9680 | 1.0044 | 0.9699 | 0.9000 | 0.9606 | 0.0219 |
| RABL2B     | 0.9307 | 1.2314 | 0.9134 | 0.7667 | 0.9606 | 0.0975 |
| MIR520H    | 1.0031 | 1.0177 | 0.9986 | 0.8229 | 0.9606 | 0.0461 |
| PRLR       | 0.9105 | 1.0347 | 1.0192 | 0.8779 | 0.9606 | 0.0390 |
| EDA2R      | 0.9418 | 0.9655 | 0.9625 | 0.9724 | 0.9606 | 0.0066 |
| CMA1       | 0.8756 | 1.0786 | 1.1114 | 0.7767 | 0.9606 | 0.0805 |
| MAGEE2     | 0.8953 | 1.0163 | 0.9888 | 0.9419 | 0.9606 | 0.0266 |
| LOC728334  | 0.8880 | 0.9837 | 1.0133 | 0.9573 | 0.9606 | 0.0268 |
| LOC650256  | 0.8947 | 1.0947 | 1.0027 | 0.8504 | 0.9606 | 0.0550 |
| C2orf50    | 0.9781 | 0.9951 | 0.9778 | 0.8914 | 0.9606 | 0.0234 |
| PAH        | 0.8755 | 1.0824 | 1.0096 | 0.8750 | 0.9606 | 0.0515 |
| LOC1001314 | 1.0005 | 1.0588 | 0.9446 | 0.8386 | 0.9606 | 0.0469 |
| NLRP12     | 0.8555 | 1.1030 | 0.9567 | 0.9273 | 0.9606 | 0.0520 |

|            |        |        |        |        |        |        |
|------------|--------|--------|--------|--------|--------|--------|
| PRKAR2B    | 0.8691 | 1.0525 | 0.9976 | 0.9234 | 0.9606 | 0.0404 |
| FGF3       | 0.9135 | 0.9689 | 1.0385 | 0.9215 | 0.9606 | 0.0287 |
| LOC728900  | 0.8619 | 1.0848 | 1.0035 | 0.8922 | 0.9606 | 0.0514 |
| SOCS6      | 0.9115 | 1.0468 | 1.0765 | 0.8075 | 0.9606 | 0.0624 |
| GLRB       | 0.9071 | 1.0071 | 1.0171 | 0.9112 | 0.9606 | 0.0298 |
| LOC643012  | 0.9504 | 0.9523 | 1.0161 | 0.9237 | 0.9606 | 0.0196 |
| TOP1       | 0.8485 | 1.1866 | 1.0158 | 0.7916 | 0.9606 | 0.0891 |
| SPIN2B     | 0.8714 | 1.2046 | 0.9393 | 0.8272 | 0.9606 | 0.0845 |
| LOC441344  | 0.8925 | 1.0216 | 0.9830 | 0.9454 | 0.9606 | 0.0275 |
| MIR184     | 0.9654 | 1.0504 | 0.9713 | 0.8554 | 0.9606 | 0.0401 |
| SH3YL1     | 0.8161 | 1.0871 | 1.0509 | 0.8885 | 0.9606 | 0.0647 |
| IL1RL1     | 0.8955 | 1.0872 | 1.0059 | 0.8540 | 0.9606 | 0.0530 |
| C10orf85   | 0.9111 | 1.1018 | 0.9782 | 0.8515 | 0.9606 | 0.0537 |
| LOC644710  | 0.8701 | 1.0103 | 1.0271 | 0.9351 | 0.9607 | 0.0362 |
| ZNF704     | 0.9486 | 1.0064 | 1.0264 | 0.8612 | 0.9607 | 0.0370 |
| FREM2      | 0.8635 | 1.0187 | 1.0550 | 0.9055 | 0.9607 | 0.0454 |
| C9orf37    | 0.9108 | 1.0359 | 1.1153 | 0.7807 | 0.9607 | 0.0733 |
| MIR450A2   | 0.9633 | 0.9540 | 1.0414 | 0.8839 | 0.9607 | 0.0322 |
| SCARNA8    | 0.8842 | 0.9842 | 1.0420 | 0.9322 | 0.9607 | 0.0339 |
| LOC1001316 | 0.7990 | 1.0979 | 0.9415 | 1.0043 | 0.9607 | 0.0627 |
| SLC35C1    | 0.8444 | 1.4949 | 0.8148 | 0.6885 | 0.9607 | 0.1813 |
| LOC121792  | 0.8633 | 1.1364 | 0.9007 | 0.9423 | 0.9607 | 0.0607 |
| SLC39A2    | 0.8797 | 1.0208 | 0.9734 | 0.9688 | 0.9607 | 0.0294 |
| MIR770     | 0.8387 | 1.0680 | 0.9696 | 0.9664 | 0.9607 | 0.0470 |
| MYBPC3     | 0.8858 | 0.9074 | 1.0730 | 0.9766 | 0.9607 | 0.0422 |
| LOC642953  | 0.9269 | 0.9511 | 1.0266 | 0.9381 | 0.9607 | 0.0225 |
| LOC645454  | 0.8432 | 1.1436 | 1.0034 | 0.8525 | 0.9607 | 0.0712 |
| TTLL2      | 0.9345 | 1.0120 | 1.0231 | 0.8732 | 0.9607 | 0.0352 |
| LOC391777  | 0.8710 | 1.2076 | 1.0754 | 0.6887 | 0.9607 | 0.1141 |
| SEZ6L      | 0.9317 | 0.9649 | 1.0131 | 0.9331 | 0.9607 | 0.0191 |
| TSHZ3      | 1.0032 | 1.1397 | 0.9252 | 0.7748 | 0.9607 | 0.0762 |
| GPSM3      | 0.8552 | 1.1353 | 0.8906 | 0.9617 | 0.9607 | 0.0623 |
| KIAA0565   | 0.9148 | 1.0259 | 1.0016 | 0.9006 | 0.9607 | 0.0312 |
| HCG8       | 0.9149 | 1.0238 | 1.0744 | 0.8297 | 0.9607 | 0.0549 |
| LOC1001339 | 0.9966 | 0.9753 | 1.0185 | 0.8525 | 0.9607 | 0.0371 |
| LOC1001304 | 0.8934 | 1.0375 | 1.0011 | 0.9109 | 0.9607 | 0.0348 |
| MIR202     | 0.9905 | 0.9607 | 1.0430 | 0.8486 | 0.9607 | 0.0411 |
| LOC643866  | 0.9147 | 1.0293 | 0.9914 | 0.9075 | 0.9607 | 0.0297 |
| RAB12      | 0.9123 | 1.1143 | 0.9182 | 0.8982 | 0.9607 | 0.0513 |
| LOC1001309 | 0.8488 | 1.0608 | 1.0280 | 0.9053 | 0.9607 | 0.0501 |
| GPR172B    | 0.8329 | 0.9987 | 1.0417 | 0.9696 | 0.9607 | 0.0451 |
| LOC1001312 | 0.8943 | 1.0618 | 0.9813 | 0.9057 | 0.9607 | 0.0388 |
| ZNF420     | 0.8633 | 1.0901 | 1.0192 | 0.8704 | 0.9607 | 0.0561 |
| MFAP2      | 0.9053 | 1.0544 | 1.0210 | 0.8623 | 0.9607 | 0.0458 |
| HOXB6      | 0.8256 | 1.1105 | 1.0476 | 0.8592 | 0.9608 | 0.0698 |
| LOC730109  | 0.9286 | 1.1153 | 0.9972 | 0.8019 | 0.9608 | 0.0655 |

|            |        |        |        |        |        |        |
|------------|--------|--------|--------|--------|--------|--------|
| MGC13168   | 0.9727 | 1.0587 | 0.9286 | 0.8830 | 0.9608 | 0.0374 |
| C15orf33   | 0.9452 | 1.0490 | 1.0536 | 0.7952 | 0.9608 | 0.0606 |
| LOC1001302 | 0.9290 | 1.0307 | 0.9611 | 0.9222 | 0.9608 | 0.0248 |
| EVPL       | 0.9291 | 1.3144 | 0.8489 | 0.7507 | 0.9608 | 0.1234 |
| PPIL4      | 0.9178 | 1.0042 | 0.9452 | 0.9759 | 0.9608 | 0.0187 |
| LOC653598  | 0.9367 | 0.9388 | 1.0468 | 0.9208 | 0.9608 | 0.0290 |
| SLFN13     | 0.8167 | 1.0182 | 1.0558 | 0.9524 | 0.9608 | 0.0526 |
| LOC649294  | 0.9109 | 1.0503 | 1.0301 | 0.8518 | 0.9608 | 0.0476 |
| KRTAP10-2  | 0.9453 | 0.9694 | 1.0525 | 0.8760 | 0.9608 | 0.0364 |
| NELL1      | 0.9046 | 1.0015 | 1.0478 | 0.8892 | 0.9608 | 0.0382 |
| HSD17B8    | 0.9537 | 1.3156 | 0.9174 | 0.6565 | 0.9608 | 0.1355 |
| LOC642372  | 0.8575 | 1.1399 | 0.9888 | 0.8570 | 0.9608 | 0.0673 |
| MGC13057   | 0.8802 | 0.9817 | 1.0596 | 0.9218 | 0.9608 | 0.0390 |
| D21S2056E  | 0.8554 | 1.0457 | 1.0329 | 0.9093 | 0.9608 | 0.0467 |
| C14orf56   | 0.8811 | 0.9726 | 1.0656 | 0.9240 | 0.9608 | 0.0396 |
| LOC653145  | 0.8741 | 1.0619 | 1.0144 | 0.8929 | 0.9608 | 0.0458 |
| LOC645195  | 0.9303 | 0.9446 | 1.0775 | 0.8909 | 0.9608 | 0.0405 |
| C1orf101   | 0.9922 | 1.1457 | 0.8298 | 0.8756 | 0.9608 | 0.0705 |
| C14orf128  | 0.9147 | 1.0501 | 0.9939 | 0.8847 | 0.9608 | 0.0376 |
| LOC1001012 | 1.0008 | 0.9577 | 0.9758 | 0.9092 | 0.9609 | 0.0194 |
| LOC645574  | 0.8665 | 1.1714 | 0.9933 | 0.8122 | 0.9609 | 0.0798 |
| TGM6       | 0.9240 | 1.0211 | 1.0520 | 0.8464 | 0.9609 | 0.0469 |
| MIA        | 0.9841 | 1.0524 | 0.9905 | 0.8164 | 0.9609 | 0.0506 |
| SMCR8      | 0.9341 | 0.9954 | 1.0369 | 0.8770 | 0.9609 | 0.0350 |
| LOC1001308 | 0.8973 | 0.9761 | 0.9919 | 0.9781 | 0.9609 | 0.0215 |
| GRIP2      | 0.9084 | 1.0131 | 1.0012 | 0.9208 | 0.9609 | 0.0270 |
| PAX9       | 0.8465 | 1.1309 | 1.0502 | 0.8159 | 0.9609 | 0.0769 |
| MGC48637   | 0.8990 | 1.0448 | 1.0318 | 0.8679 | 0.9609 | 0.0452 |
| BLID       | 0.8994 | 0.9930 | 1.0836 | 0.8675 | 0.9609 | 0.0488 |
| LOC1001294 | 0.7030 | 1.3497 | 0.9575 | 0.8333 | 0.9609 | 0.1396 |
| LGSN       | 0.9349 | 1.0550 | 1.0122 | 0.8414 | 0.9609 | 0.0469 |
| LOC1001334 | 0.9081 | 0.9964 | 1.0740 | 0.8650 | 0.9609 | 0.0466 |
| LOC646048  | 0.8584 | 1.0154 | 0.9969 | 0.9728 | 0.9609 | 0.0353 |
| MAGEF1     | 0.9266 | 1.3457 | 0.8244 | 0.7470 | 0.9609 | 0.1334 |
| LOC1001281 | 0.8950 | 0.9967 | 1.0082 | 0.9437 | 0.9609 | 0.0261 |
| LDB1       | 0.9074 | 1.1258 | 0.8634 | 0.9470 | 0.9609 | 0.0576 |
| LOC646111  | 0.9933 | 1.0878 | 0.8776 | 0.8849 | 0.9609 | 0.0499 |
| LOC649209  | 0.8580 | 1.1767 | 1.0928 | 0.7161 | 0.9609 | 0.1059 |
| UST        | 0.8661 | 1.1156 | 0.9626 | 0.8994 | 0.9609 | 0.0553 |
| C10orf21   | 0.8793 | 1.1263 | 1.0364 | 0.8017 | 0.9609 | 0.0736 |
| LOC643296  | 0.9095 | 1.0305 | 0.9654 | 0.9383 | 0.9609 | 0.0258 |
| DAZ1       | 0.8531 | 1.0757 | 1.0031 | 0.9118 | 0.9609 | 0.0492 |
| LOC1001319 | 0.9115 | 1.0529 | 0.9965 | 0.8828 | 0.9609 | 0.0390 |
| SNORD88C   | 0.8328 | 1.1785 | 0.9170 | 0.9154 | 0.9609 | 0.0751 |
| RAB43      | 0.9382 | 1.0819 | 0.9939 | 0.8297 | 0.9609 | 0.0528 |
| LOC1001314 | 0.9698 | 1.0276 | 0.9777 | 0.8687 | 0.9609 | 0.0333 |

|            |        |        |        |        |        |        |
|------------|--------|--------|--------|--------|--------|--------|
| FAM62C     | 0.8980 | 1.0568 | 0.9815 | 0.9075 | 0.9609 | 0.0370 |
| LOC391766  | 0.9294 | 1.0307 | 0.9523 | 0.9314 | 0.9609 | 0.0238 |
| LOC729517  | 0.9707 | 1.0683 | 0.8625 | 0.9423 | 0.9609 | 0.0425 |
| CHORDC1    | 0.9310 | 1.2162 | 1.0014 | 0.6952 | 0.9609 | 0.1073 |
| HTR3E      | 0.8745 | 0.9747 | 1.0312 | 0.9634 | 0.9609 | 0.0324 |
| KRTAP4-7   | 0.8829 | 0.9717 | 1.1072 | 0.8819 | 0.9609 | 0.0531 |
| ZSCAN21    | 0.9789 | 1.1515 | 0.9633 | 0.7501 | 0.9609 | 0.0822 |
| AP4S1      | 0.9641 | 1.0711 | 0.9712 | 0.8373 | 0.9609 | 0.0479 |
| MIPOL1     | 0.8025 | 1.2756 | 1.1138 | 0.6519 | 0.9609 | 0.1423 |
| ZNF100     | 0.9578 | 1.0457 | 0.9762 | 0.8641 | 0.9609 | 0.0374 |
| LOC644512  | 0.9441 | 1.0671 | 1.0632 | 0.7695 | 0.9609 | 0.0699 |
| MC3R       | 0.9802 | 1.0492 | 0.9215 | 0.8928 | 0.9610 | 0.0346 |
| LOC728493  | 0.8540 | 0.9828 | 1.0952 | 0.9119 | 0.9610 | 0.0519 |
| KRTAP21-3  | 0.9626 | 0.9710 | 0.9764 | 0.9337 | 0.9610 | 0.0095 |
| MFAP5      | 0.9338 | 1.0712 | 0.9832 | 0.8556 | 0.9610 | 0.0452 |
| ZFR2       | 0.9310 | 1.1970 | 0.9247 | 0.7912 | 0.9610 | 0.0850 |
| LOC133491  | 0.9348 | 1.0028 | 1.0035 | 0.9028 | 0.9610 | 0.0252 |
| HERC4      | 0.9114 | 1.2601 | 0.8832 | 0.7892 | 0.9610 | 0.1031 |
| TMCO2      | 0.9370 | 1.0818 | 0.9372 | 0.8879 | 0.9610 | 0.0419 |
| SLC10A6    | 0.9252 | 1.0315 | 0.9825 | 0.9048 | 0.9610 | 0.0287 |
| FLJ41327   | 0.9002 | 1.0887 | 1.0049 | 0.8501 | 0.9610 | 0.0534 |
| ICOSLG     | 0.8191 | 0.9935 | 1.1415 | 0.8898 | 0.9610 | 0.0700 |
| CD38       | 0.8960 | 1.0120 | 1.0249 | 0.9110 | 0.9610 | 0.0334 |
| GABRG1     | 0.9222 | 0.9973 | 0.9907 | 0.9338 | 0.9610 | 0.0192 |
| THTPA      | 0.8988 | 1.1016 | 0.9718 | 0.8718 | 0.9610 | 0.0514 |
| LOC644070  | 0.9235 | 0.9873 | 1.0445 | 0.8888 | 0.9610 | 0.0345 |
| UBR4       | 0.8576 | 1.4193 | 0.8319 | 0.7352 | 0.9610 | 0.1550 |
| LOC144383  | 0.9502 | 0.9869 | 1.0571 | 0.8499 | 0.9610 | 0.0432 |
| C17orf46   | 0.9776 | 1.1112 | 0.9271 | 0.8283 | 0.9610 | 0.0589 |
| LOC728175  | 0.8770 | 1.1204 | 0.9404 | 0.9064 | 0.9610 | 0.0547 |
| LOC642843  | 0.9265 | 1.0143 | 1.0388 | 0.8647 | 0.9611 | 0.0402 |
| DNAH3      | 0.8835 | 1.0694 | 1.0402 | 0.8511 | 0.9611 | 0.0548 |
| LOC1001299 | 0.9204 | 1.0687 | 0.8791 | 0.9760 | 0.9611 | 0.0410 |
| ATRX       | 0.8784 | 1.1387 | 1.0115 | 0.8156 | 0.9611 | 0.0719 |
| PTPRD      | 0.9338 | 1.0155 | 0.9524 | 0.9426 | 0.9611 | 0.0185 |
| PAQR8      | 0.8794 | 0.9954 | 1.0789 | 0.8905 | 0.9611 | 0.0472 |
| SYNPO2     | 0.8833 | 1.0724 | 0.9998 | 0.8887 | 0.9611 | 0.0458 |
| ZNF284     | 0.8356 | 1.0918 | 1.0822 | 0.8347 | 0.9611 | 0.0727 |
| LOC643449  | 0.9311 | 0.9602 | 1.0731 | 0.8799 | 0.9611 | 0.0409 |
| POTE14     | 0.8288 | 1.1081 | 0.9896 | 0.9178 | 0.9611 | 0.0590 |
| LOC730755  | 0.8613 | 1.0268 | 0.9194 | 1.0369 | 0.9611 | 0.0426 |
| INHBA      | 0.9321 | 1.0519 | 0.9627 | 0.8977 | 0.9611 | 0.0331 |
| LOC645627  | 0.8647 | 1.0187 | 1.0317 | 0.9293 | 0.9611 | 0.0394 |
| LOC647281  | 0.9163 | 0.9260 | 1.0676 | 0.9345 | 0.9611 | 0.0357 |
| PMS2L1     | 0.8595 | 1.1196 | 0.9844 | 0.8810 | 0.9611 | 0.0594 |
| LOC1001319 | 0.8657 | 1.0761 | 1.0656 | 0.8370 | 0.9611 | 0.0637 |



|            |        |        |        |        |        |        |
|------------|--------|--------|--------|--------|--------|--------|
| MAP7D2     | 0.8363 | 1.0807 | 1.0524 | 0.8750 | 0.9611 | 0.0617 |
| PRM3       | 0.8769 | 1.1155 | 0.9906 | 0.8615 | 0.9611 | 0.0590 |
| C9orf126   | 0.9296 | 0.9767 | 1.1167 | 0.8215 | 0.9611 | 0.0612 |
| POLR2J4    | 0.8973 | 1.0580 | 1.0108 | 0.8785 | 0.9611 | 0.0435 |
| LOC1001290 | 0.8539 | 1.0984 | 1.0298 | 0.8625 | 0.9611 | 0.0611 |
| ERCC-00012 | 0.8816 | 1.0414 | 0.9891 | 0.9324 | 0.9611 | 0.0346 |
| NXPH3      | 0.9078 | 1.0062 | 1.0667 | 0.8639 | 0.9611 | 0.0461 |
| P2RY2      | 0.9030 | 1.0383 | 0.9764 | 0.9269 | 0.9611 | 0.0299 |
| C14orf37   | 0.9173 | 1.0752 | 0.9769 | 0.8752 | 0.9611 | 0.0434 |
| SNAR-I     | 0.9739 | 1.0556 | 0.9485 | 0.8667 | 0.9611 | 0.0389 |
| LOC642797  | 0.9038 | 1.1040 | 0.9368 | 0.9000 | 0.9612 | 0.0483 |
| EPB41      | 0.8857 | 1.1251 | 0.9703 | 0.8635 | 0.9612 | 0.0593 |
| LOC649023  | 0.9104 | 1.0824 | 0.9943 | 0.8575 | 0.9612 | 0.0493 |
| MIR765     | 0.8382 | 0.9763 | 1.0512 | 0.9789 | 0.9612 | 0.0445 |
| GRIN2B     | 0.8774 | 1.0443 | 0.9825 | 0.9405 | 0.9612 | 0.0351 |
| WDR85      | 0.9059 | 1.1317 | 1.0158 | 0.7913 | 0.9612 | 0.0730 |
| LOC340515  | 1.0013 | 0.9744 | 0.9494 | 0.9196 | 0.9612 | 0.0174 |
| LOC642918  | 0.9763 | 0.9976 | 0.9683 | 0.9025 | 0.9612 | 0.0205 |
| LOC203235  | 0.9927 | 1.0239 | 0.9374 | 0.8908 | 0.9612 | 0.0295 |
| LOC644635  | 0.9332 | 1.0556 | 1.0413 | 0.8147 | 0.9612 | 0.0559 |
| RSPH9      | 0.8846 | 1.0792 | 0.9627 | 0.9183 | 0.9612 | 0.0425 |
| P2RX3      | 0.9642 | 1.0097 | 1.0337 | 0.8373 | 0.9612 | 0.0437 |
| RCN2       | 0.7256 | 1.3321 | 1.0110 | 0.7762 | 0.9612 | 0.1384 |
| UBE2U      | 0.8358 | 1.0732 | 1.0000 | 0.9358 | 0.9612 | 0.0503 |
| SLC26A9    | 0.9499 | 1.0157 | 0.9848 | 0.8945 | 0.9612 | 0.0260 |
| MAL        | 0.8704 | 1.1013 | 0.9598 | 0.9134 | 0.9612 | 0.0501 |
| THAP5      | 0.9203 | 1.0274 | 0.9525 | 0.9447 | 0.9612 | 0.0231 |
| OR2G2      | 0.8486 | 0.9547 | 1.0355 | 1.0061 | 0.9612 | 0.0411 |
| LOC1001332 | 0.9819 | 1.1372 | 1.0461 | 0.6797 | 0.9612 | 0.0991 |
| WDR16      | 0.9429 | 1.0376 | 1.0056 | 0.8589 | 0.9612 | 0.0394 |
| OR13C4     | 0.8779 | 0.9060 | 1.1913 | 0.8698 | 0.9612 | 0.0771 |
| EPR1       | 0.8873 | 1.0526 | 1.0630 | 0.8421 | 0.9613 | 0.0565 |
| LOC387856  | 0.9295 | 0.9999 | 0.9749 | 0.9408 | 0.9613 | 0.0161 |
| GPR61      | 0.8793 | 1.2044 | 0.9254 | 0.8359 | 0.9613 | 0.0831 |
| SNORD114-2 | 0.9290 | 0.9728 | 1.0235 | 0.9198 | 0.9613 | 0.0237 |
| CLSPN      | 0.8327 | 1.0643 | 0.9956 | 0.9524 | 0.9613 | 0.0487 |
| FLJ25404   | 0.9183 | 1.0367 | 0.9977 | 0.8924 | 0.9613 | 0.0337 |
| LOC727732  | 0.8918 | 1.2776 | 0.8949 | 0.7808 | 0.9613 | 0.1087 |
| GPR77      | 0.9790 | 1.0204 | 0.8895 | 0.9562 | 0.9613 | 0.0274 |
| C19orf53   | 0.7811 | 1.2457 | 1.0015 | 0.8168 | 0.9613 | 0.1064 |
| MUC12      | 0.8924 | 1.0568 | 1.0283 | 0.8676 | 0.9613 | 0.0476 |
| C1D        | 0.8973 | 1.0125 | 0.9924 | 0.9428 | 0.9613 | 0.0259 |
| MIR548Q    | 0.8653 | 1.1542 | 1.0309 | 0.7948 | 0.9613 | 0.0811 |
| GMIP       | 0.9580 | 1.1301 | 0.9974 | 0.7596 | 0.9613 | 0.0766 |
| ARMCX4     | 0.9743 | 1.0109 | 1.0081 | 0.8519 | 0.9613 | 0.0374 |
| COMMD8     | 0.7658 | 1.2723 | 1.0852 | 0.7219 | 0.9613 | 0.1315 |

|            |        |        |        |        |        |        |
|------------|--------|--------|--------|--------|--------|--------|
| LOC732075  | 0.8784 | 1.0409 | 1.0607 | 0.8651 | 0.9613 | 0.0519 |
| LOC647439  | 0.8855 | 1.2119 | 0.9094 | 0.8385 | 0.9613 | 0.0848 |
| ENO2       | 0.9169 | 1.3180 | 0.8026 | 0.8077 | 0.9613 | 0.1218 |
| SNORD35A   | 0.8011 | 1.1277 | 1.0882 | 0.8282 | 0.9613 | 0.0852 |
| C5orf39    | 0.8219 | 1.1522 | 1.0229 | 0.8484 | 0.9613 | 0.0777 |
| SLC25A30   | 0.7610 | 1.2686 | 1.0641 | 0.7516 | 0.9613 | 0.1255 |
| LOC641959  | 0.9151 | 1.1071 | 0.9819 | 0.8412 | 0.9613 | 0.0564 |
| C10orf39   | 0.9596 | 1.1725 | 0.9101 | 0.8032 | 0.9613 | 0.0776 |
| CSF3       | 0.8805 | 1.0445 | 0.9945 | 0.9258 | 0.9613 | 0.0363 |
| IL17B      | 0.9147 | 1.0482 | 1.0371 | 0.8454 | 0.9613 | 0.0491 |
| LOC651905  | 1.0504 | 0.9985 | 0.9671 | 0.8294 | 0.9613 | 0.0472 |
| ANPEP      | 0.9319 | 1.1385 | 0.9759 | 0.7991 | 0.9613 | 0.0700 |
| UBE2D4     | 0.8498 | 1.2885 | 1.0472 | 0.6599 | 0.9614 | 0.1347 |
| ZNF562     | 0.7854 | 1.2676 | 1.0039 | 0.7884 | 0.9614 | 0.1142 |
| SNORA11D   | 1.0222 | 1.0253 | 0.9164 | 0.8816 | 0.9614 | 0.0367 |
| INTS7      | 1.0011 | 0.9753 | 1.1046 | 0.7644 | 0.9614 | 0.0713 |
| LOC388237  | 0.8347 | 1.1128 | 1.0062 | 0.8917 | 0.9614 | 0.0618 |
| LOC340549  | 0.9750 | 1.1657 | 0.9738 | 0.7309 | 0.9614 | 0.0891 |
| MGC35030   | 0.8640 | 1.0371 | 1.0271 | 0.9173 | 0.9614 | 0.0423 |
| MIR15A     | 0.8870 | 1.0822 | 0.9692 | 0.9071 | 0.9614 | 0.0439 |
| OR3A4      | 0.8760 | 1.0706 | 0.9018 | 0.9971 | 0.9614 | 0.0448 |
| PCDH12     | 0.9050 | 1.1379 | 0.9349 | 0.8678 | 0.9614 | 0.0604 |
| LOC645489  | 1.0350 | 1.1395 | 0.9617 | 0.7093 | 0.9614 | 0.0916 |
| LOC649747  | 0.8785 | 1.0316 | 1.1493 | 0.7861 | 0.9614 | 0.0805 |
| MPL        | 0.9871 | 1.0227 | 0.9750 | 0.8608 | 0.9614 | 0.0350 |
| LOC647534  | 0.8906 | 1.2057 | 1.0104 | 0.7389 | 0.9614 | 0.0986 |
| LOC1001340 | 0.8866 | 1.1086 | 1.0745 | 0.7759 | 0.9614 | 0.0788 |
| EXTL2      | 0.8502 | 1.3720 | 0.9112 | 0.7123 | 0.9614 | 0.1430 |
| FBXW10     | 0.8232 | 1.0579 | 1.0302 | 0.9343 | 0.9614 | 0.0531 |
| LOC387763  | 0.9043 | 1.0394 | 1.0414 | 0.8607 | 0.9614 | 0.0464 |
| SKP1A      | 0.8726 | 1.3083 | 0.8813 | 0.7836 | 0.9614 | 0.1177 |
| LOC148003  | 0.9814 | 1.0756 | 0.9310 | 0.8578 | 0.9614 | 0.0457 |
| NLRP9      | 0.8380 | 1.0698 | 0.9194 | 1.0186 | 0.9614 | 0.0517 |
| LOC732139  | 0.7993 | 1.2436 | 0.8888 | 0.9141 | 0.9614 | 0.0972 |
| LOC646982  | 0.9136 | 1.0591 | 1.0395 | 0.8336 | 0.9615 | 0.0534 |
| NBAS       | 0.8516 | 1.2232 | 0.9582 | 0.8129 | 0.9615 | 0.0925 |
| ZNF452     | 0.8818 | 1.0723 | 1.0207 | 0.8710 | 0.9615 | 0.0503 |
| GNGT1      | 0.9668 | 0.9916 | 1.0241 | 0.8634 | 0.9615 | 0.0347 |
| LOC653796  | 0.9585 | 1.1054 | 0.8882 | 0.8939 | 0.9615 | 0.0505 |
| PH-4       | 0.9766 | 0.9888 | 0.9756 | 0.9051 | 0.9615 | 0.0191 |
| C16orf82   | 0.8797 | 1.0429 | 1.0624 | 0.8609 | 0.9615 | 0.0529 |
| RAB40C     | 0.9381 | 1.3007 | 0.8636 | 0.7435 | 0.9615 | 0.1200 |
| LOC646891  | 0.9916 | 1.0907 | 0.8848 | 0.8789 | 0.9615 | 0.0503 |
| LRRC14     | 0.8090 | 1.2698 | 0.9688 | 0.7985 | 0.9615 | 0.1099 |
| CGREF1     | 0.9693 | 1.0039 | 0.9493 | 0.9235 | 0.9615 | 0.0170 |
| LOC645818  | 0.8931 | 1.1098 | 1.0583 | 0.7849 | 0.9615 | 0.0748 |

|            |        |        |        |        |        |        |
|------------|--------|--------|--------|--------|--------|--------|
| LOC1001326 | 0.9025 | 1.0982 | 0.9272 | 0.9181 | 0.9615 | 0.0459 |
| LOC652324  | 0.7622 | 1.2583 | 0.9853 | 0.8403 | 0.9615 | 0.1092 |
| PRO1853    | 0.8783 | 1.1035 | 0.9973 | 0.8671 | 0.9615 | 0.0557 |
| DNAJB9     | 1.0506 | 1.2411 | 0.9279 | 0.6265 | 0.9615 | 0.1289 |
| LOC389983  | 0.8940 | 1.1232 | 0.9680 | 0.8609 | 0.9615 | 0.0584 |
| LOC643189  | 0.9112 | 1.0260 | 0.9990 | 0.9100 | 0.9615 | 0.0299 |
| LOC648898  | 0.9127 | 1.0404 | 1.0158 | 0.8773 | 0.9615 | 0.0394 |
| LOC1001324 | 0.8939 | 1.1549 | 0.9098 | 0.8876 | 0.9616 | 0.0646 |
| LOC649978  | 0.9075 | 1.0728 | 0.9239 | 0.9420 | 0.9616 | 0.0377 |
| LOC644567  | 0.9929 | 0.9781 | 0.9060 | 0.9693 | 0.9616 | 0.0192 |
| KRT37      | 0.9386 | 0.9215 | 1.1128 | 0.8734 | 0.9616 | 0.0523 |
| IGFBP6     | 0.8808 | 1.2006 | 0.9713 | 0.7936 | 0.9616 | 0.0876 |
| ZBTB1      | 0.8859 | 1.1148 | 0.9102 | 0.9355 | 0.9616 | 0.0521 |
| LOC652587  | 0.9381 | 1.0124 | 1.0427 | 0.8530 | 0.9616 | 0.0423 |
| LOC1001283 | 0.9078 | 1.0893 | 0.9843 | 0.8650 | 0.9616 | 0.0492 |
| LOC1001325 | 0.9060 | 1.0473 | 1.0170 | 0.8760 | 0.9616 | 0.0417 |
| LOC1001300 | 0.9769 | 1.1138 | 0.9033 | 0.8524 | 0.9616 | 0.0568 |
| MRGPPE     | 0.9299 | 1.0476 | 0.9511 | 0.9177 | 0.9616 | 0.0295 |
| RPL14      | 0.7888 | 1.1279 | 1.3110 | 0.6187 | 0.9616 | 0.1574 |
| C20orf151  | 0.9790 | 0.9393 | 1.1305 | 0.7975 | 0.9616 | 0.0685 |
| FLJ42875   | 0.9185 | 1.0702 | 0.9861 | 0.8716 | 0.9616 | 0.0432 |
| LOC728626  | 0.8125 | 1.0681 | 1.0481 | 0.9178 | 0.9616 | 0.0598 |
| ADAMTSL4   | 0.9078 | 1.0498 | 1.0057 | 0.8832 | 0.9616 | 0.0395 |
| SNORD113-7 | 0.8355 | 1.1429 | 0.9080 | 0.9601 | 0.9616 | 0.0656 |
| LOC730510  | 0.9807 | 1.0098 | 0.9742 | 0.8818 | 0.9616 | 0.0277 |
| LOC649800  | 0.8917 | 1.0139 | 1.0094 | 0.9314 | 0.9616 | 0.0300 |
| FCGBP      | 0.8765 | 1.1107 | 0.9857 | 0.8735 | 0.9616 | 0.0561 |
| LOC641926  | 0.9683 | 1.0637 | 0.9057 | 0.9088 | 0.9616 | 0.0370 |
| C13orf18   | 0.9519 | 0.9695 | 1.0401 | 0.8850 | 0.9616 | 0.0319 |
| LOC285733  | 0.9771 | 0.9994 | 0.9658 | 0.9042 | 0.9616 | 0.0204 |
| LOC388401  | 0.9015 | 0.9978 | 1.0360 | 0.9112 | 0.9616 | 0.0329 |
| C11orf67   | 0.9717 | 1.1720 | 0.9803 | 0.7226 | 0.9616 | 0.0921 |
| STAG2      | 0.9301 | 1.2668 | 0.9461 | 0.7036 | 0.9617 | 0.1158 |
| ARFGAP2    | 0.9089 | 1.1082 | 0.9999 | 0.8296 | 0.9617 | 0.0600 |
| PTPDC1     | 0.8700 | 1.1112 | 1.0253 | 0.8401 | 0.9617 | 0.0643 |
| GP2        | 1.0183 | 1.0240 | 0.9402 | 0.8641 | 0.9617 | 0.0377 |
| RAB20      | 0.8304 | 1.2186 | 0.9933 | 0.8043 | 0.9617 | 0.0953 |
| LOC643584  | 0.9579 | 1.0796 | 0.9752 | 0.8340 | 0.9617 | 0.0503 |
| FRMD5      | 1.0060 | 1.0186 | 0.9394 | 0.8826 | 0.9617 | 0.0316 |
| PIWIL2     | 0.9337 | 1.0385 | 1.0070 | 0.8675 | 0.9617 | 0.0383 |
| LOC1001334 | 0.9209 | 1.1653 | 0.9019 | 0.8587 | 0.9617 | 0.0691 |
| LOC284395  | 1.0176 | 0.9974 | 0.9420 | 0.8897 | 0.9617 | 0.0288 |
| WDR40A     | 0.8513 | 1.2678 | 0.9398 | 0.7879 | 0.9617 | 0.1067 |
| C12orf53   | 0.9304 | 1.0419 | 0.9816 | 0.8928 | 0.9617 | 0.0323 |
| LOC651546  | 0.8973 | 1.1819 | 0.9497 | 0.8179 | 0.9617 | 0.0783 |
| USP9X      | 0.8993 | 1.2151 | 0.9361 | 0.7963 | 0.9617 | 0.0895 |

|            |        |        |        |        |        |        |
|------------|--------|--------|--------|--------|--------|--------|
| LOC1001307 | 0.9251 | 0.9588 | 1.0064 | 0.9565 | 0.9617 | 0.0168 |
| MMRN1      | 0.9190 | 1.0729 | 0.9830 | 0.8720 | 0.9617 | 0.0435 |
| BPY2B      | 0.8482 | 1.1105 | 1.0791 | 0.8091 | 0.9617 | 0.0775 |
| LOC644120  | 0.8889 | 0.9863 | 0.9843 | 0.9874 | 0.9617 | 0.0243 |
| TMCC3      | 0.8988 | 1.0745 | 1.0064 | 0.8673 | 0.9617 | 0.0480 |
| LOC285205  | 1.0080 | 0.9363 | 0.9419 | 0.9606 | 0.9617 | 0.0163 |
| ADPRHL1    | 0.9559 | 1.1404 | 0.9918 | 0.7588 | 0.9617 | 0.0786 |
| PRH2       | 0.9436 | 1.0198 | 0.8613 | 1.0221 | 0.9617 | 0.0381 |
| APOA2      | 0.9707 | 1.0097 | 0.9749 | 0.8916 | 0.9617 | 0.0250 |
| LOC647310  | 1.0175 | 0.9921 | 1.0159 | 0.8214 | 0.9617 | 0.0471 |
| GALNT7     | 0.9205 | 1.0568 | 0.9647 | 0.9050 | 0.9617 | 0.0341 |
| CXCL11     | 0.9251 | 1.0880 | 0.9711 | 0.8629 | 0.9617 | 0.0476 |
| GCGR       | 0.8444 | 1.0130 | 1.1185 | 0.8712 | 0.9617 | 0.0640 |
| LOC651007  | 0.8820 | 1.0776 | 0.9739 | 0.9134 | 0.9618 | 0.0431 |
| OR2C3      | 0.8941 | 1.0791 | 1.0456 | 0.8282 | 0.9618 | 0.0600 |
| LOC1001342 | 0.9014 | 1.1147 | 0.9309 | 0.9001 | 0.9618 | 0.0515 |
| MUCDHL     | 1.0094 | 1.0185 | 0.8816 | 0.9375 | 0.9618 | 0.0323 |
| BCL2A1     | 0.9057 | 1.0106 | 1.1000 | 0.8308 | 0.9618 | 0.0590 |
| LOC1001343 | 0.8638 | 1.0919 | 1.0323 | 0.8591 | 0.9618 | 0.0592 |
| LOC440292  | 0.8612 | 1.1202 | 0.9517 | 0.9141 | 0.9618 | 0.0560 |
| C6orf182   | 0.8910 | 1.0631 | 1.0659 | 0.8271 | 0.9618 | 0.0607 |
| AGRN       | 0.9989 | 1.2795 | 0.8484 | 0.7202 | 0.9618 | 0.1203 |
| LOC642453  | 0.8836 | 0.9588 | 1.0781 | 0.9266 | 0.9618 | 0.0417 |
| CSTA       | 0.9105 | 0.9416 | 1.0541 | 0.9409 | 0.9618 | 0.0316 |
| C1QA       | 1.0069 | 0.9526 | 0.9717 | 0.9159 | 0.9618 | 0.0190 |
| R3HDML     | 0.9933 | 0.9756 | 1.0265 | 0.8518 | 0.9618 | 0.0382 |
| UBE1C      | 0.8828 | 1.0824 | 1.0651 | 0.8168 | 0.9618 | 0.0661 |
| SV2B       | 0.8707 | 1.1452 | 0.8957 | 0.9356 | 0.9618 | 0.0626 |
| CLCNKA     | 0.9288 | 1.0879 | 0.9672 | 0.8632 | 0.9618 | 0.0472 |
| LOC1001299 | 0.9555 | 0.9771 | 1.0272 | 0.8874 | 0.9618 | 0.0290 |
| FAM171A1   | 0.8082 | 1.3429 | 0.9534 | 0.7428 | 0.9618 | 0.1344 |
| LOC644474  | 1.0527 | 0.9551 | 0.9728 | 0.8666 | 0.9618 | 0.0382 |
| SYT5       | 0.9834 | 1.1128 | 0.9921 | 0.7589 | 0.9618 | 0.0738 |
| ZEB2       | 0.9633 | 0.9749 | 1.0138 | 0.8952 | 0.9618 | 0.0247 |
| RHOBTB2    | 0.8016 | 1.2858 | 0.9745 | 0.7854 | 0.9618 | 0.1162 |
| TMEM217    | 0.8791 | 1.1020 | 0.9802 | 0.8860 | 0.9618 | 0.0521 |
| PITX2      | 0.8656 | 1.0751 | 0.9977 | 0.9089 | 0.9618 | 0.0467 |
| LOC646560  | 1.0081 | 0.9424 | 1.0030 | 0.8939 | 0.9618 | 0.0271 |
| LOC653346  | 0.8476 | 1.0470 | 1.0106 | 0.9421 | 0.9618 | 0.0439 |
| ZNF474     | 0.9569 | 1.0844 | 0.9334 | 0.8727 | 0.9618 | 0.0445 |
| PTER       | 0.9294 | 1.0886 | 0.9909 | 0.8384 | 0.9618 | 0.0526 |
| LOC1001322 | 0.8529 | 1.0212 | 0.9784 | 0.9949 | 0.9618 | 0.0374 |
| FLJ42842   | 0.7834 | 1.1491 | 0.9328 | 0.9821 | 0.9618 | 0.0754 |
| GLT6D1     | 0.8859 | 1.0238 | 1.1080 | 0.8297 | 0.9619 | 0.0635 |
| LOC1001305 | 0.8669 | 1.0429 | 1.0786 | 0.8590 | 0.9619 | 0.0576 |
| LOC728060  | 0.8873 | 1.1067 | 1.0653 | 0.7881 | 0.9619 | 0.0750 |

|            |        |        |        |        |        |        |
|------------|--------|--------|--------|--------|--------|--------|
| NUDT4      | 0.8931 | 1.1090 | 0.9776 | 0.8678 | 0.9619 | 0.0544 |
| LOC652857  | 0.9601 | 1.0893 | 0.9155 | 0.8826 | 0.9619 | 0.0454 |
| LOC643152  | 0.9086 | 1.1034 | 0.9674 | 0.8681 | 0.9619 | 0.0514 |
| A1BG       | 0.9415 | 1.0823 | 0.9983 | 0.8254 | 0.9619 | 0.0539 |
| CRYGD      | 0.9118 | 1.0244 | 0.9619 | 0.9494 | 0.9619 | 0.0234 |
| PCDH24     | 0.9692 | 1.1836 | 0.9275 | 0.7672 | 0.9619 | 0.0858 |
| OR4K5      | 0.8853 | 1.0860 | 0.9919 | 0.8845 | 0.9619 | 0.0484 |
| LOC653249  | 0.8969 | 1.0533 | 1.0207 | 0.8768 | 0.9619 | 0.0440 |
| ADARB2     | 0.9042 | 1.0923 | 0.9496 | 0.9016 | 0.9619 | 0.0448 |
| SYPL2      | 0.9276 | 0.9896 | 1.0295 | 0.9011 | 0.9619 | 0.0292 |
| MIB1       | 0.9004 | 1.0445 | 1.0267 | 0.8761 | 0.9619 | 0.0430 |
| LOC727977  | 0.8966 | 1.0435 | 1.0500 | 0.8577 | 0.9619 | 0.0496 |
| DCP2       | 0.8972 | 1.2355 | 0.9869 | 0.7282 | 0.9619 | 0.1058 |
| LOC644669  | 0.9398 | 1.0910 | 0.9259 | 0.8911 | 0.9620 | 0.0442 |
| SNORD58A   | 0.7713 | 1.1213 | 1.0508 | 0.9044 | 0.9620 | 0.0780 |
| C17orf61   | 0.7901 | 1.1513 | 1.1775 | 0.7289 | 0.9620 | 0.1177 |
| RYBP       | 0.7524 | 1.3928 | 0.9352 | 0.7674 | 0.9620 | 0.1495 |
| DPYSL3     | 0.9421 | 0.9345 | 1.0304 | 0.9410 | 0.9620 | 0.0229 |
| LOC643977  | 0.9978 | 0.9969 | 0.9827 | 0.8705 | 0.9620 | 0.0307 |
| CALR3      | 0.9671 | 1.0011 | 1.0471 | 0.8326 | 0.9620 | 0.0461 |
| GNRHR2     | 0.8983 | 1.1219 | 0.8885 | 0.9393 | 0.9620 | 0.0544 |
| OLFML3     | 0.8582 | 1.0297 | 0.9953 | 0.9648 | 0.9620 | 0.0371 |
| LOC643608  | 0.8930 | 0.9368 | 0.9891 | 1.0290 | 0.9620 | 0.0298 |
| LOC651704  | 0.9785 | 1.0022 | 1.0510 | 0.8162 | 0.9620 | 0.0509 |
| OR3A1      | 0.8706 | 1.0596 | 0.9810 | 0.9367 | 0.9620 | 0.0397 |
| SEMA3B     | 0.9406 | 1.0381 | 0.9648 | 0.9044 | 0.9620 | 0.0282 |
| TMPRSS5    | 0.9739 | 1.1572 | 0.9200 | 0.7969 | 0.9620 | 0.0749 |
| SNORD36B   | 0.9302 | 1.1278 | 0.9120 | 0.8781 | 0.9620 | 0.0563 |
| MGC26647   | 0.9048 | 1.0552 | 0.9388 | 0.9492 | 0.9620 | 0.0325 |
| MORN4      | 0.9284 | 1.1217 | 1.0121 | 0.7858 | 0.9620 | 0.0708 |
| OR2T8      | 0.8775 | 1.0337 | 0.9963 | 0.9405 | 0.9620 | 0.0341 |
| LOC731898  | 0.9735 | 1.0559 | 0.9390 | 0.8797 | 0.9620 | 0.0368 |
| LOC388177  | 0.9189 | 1.0187 | 1.0368 | 0.8736 | 0.9620 | 0.0392 |
| FOXD4L4    | 1.0084 | 0.9533 | 0.9832 | 0.9031 | 0.9620 | 0.0226 |
| LOC642405  | 0.9227 | 1.0037 | 1.0137 | 0.9080 | 0.9620 | 0.0272 |
| RNY4       | 0.7734 | 1.0655 | 1.1233 | 0.8861 | 0.9621 | 0.0807 |
| LOC1001296 | 0.9700 | 1.0419 | 0.9111 | 0.9252 | 0.9621 | 0.0294 |
| TMC2       | 0.9600 | 0.9633 | 1.0285 | 0.8964 | 0.9621 | 0.0270 |
| CCDC97     | 0.8343 | 1.3195 | 0.9741 | 0.7204 | 0.9621 | 0.1299 |
| DKKL1      | 0.9152 | 0.9943 | 0.9943 | 0.9445 | 0.9621 | 0.0195 |
| MYO7A      | 0.9531 | 1.0491 | 0.9688 | 0.8773 | 0.9621 | 0.0352 |
| LOC646023  | 0.7735 | 0.9361 | 1.1165 | 1.0222 | 0.9621 | 0.0729 |
| NCOA7      | 0.8596 | 1.3485 | 0.9367 | 0.7035 | 0.9621 | 0.1376 |
| C19orf29OS | 1.0259 | 0.9830 | 0.9096 | 0.9299 | 0.9621 | 0.0263 |
| LOC652566  | 0.8072 | 1.1547 | 1.0434 | 0.8431 | 0.9621 | 0.0826 |
| LOC648659  | 1.0255 | 1.0768 | 1.0078 | 0.7383 | 0.9621 | 0.0760 |

|            |        |        |        |        |        |        |
|------------|--------|--------|--------|--------|--------|--------|
| LOC338739  | 0.9472 | 1.0617 | 0.9302 | 0.9094 | 0.9621 | 0.0341 |
| MSX1       | 0.8743 | 1.3262 | 0.9568 | 0.6912 | 0.9621 | 0.1334 |
| MBOAT4     | 1.0374 | 0.9618 | 1.0093 | 0.8400 | 0.9621 | 0.0436 |
| FLJ45032   | 0.9629 | 1.0764 | 0.9588 | 0.8503 | 0.9621 | 0.0462 |
| CNTFR      | 0.9672 | 0.9873 | 0.9947 | 0.8993 | 0.9621 | 0.0217 |
| COL28A1    | 0.8336 | 1.1038 | 1.0269 | 0.8842 | 0.9621 | 0.0625 |
| GPR143     | 0.9247 | 1.0964 | 1.0064 | 0.8210 | 0.9621 | 0.0587 |
| LOC1001286 | 0.9335 | 1.0217 | 1.0201 | 0.8732 | 0.9621 | 0.0361 |
| PPY        | 0.9061 | 1.1360 | 0.7916 | 1.0149 | 0.9621 | 0.0737 |
| MEX3A      | 0.9168 | 1.2737 | 0.8522 | 0.8058 | 0.9621 | 0.1063 |
| ZNF418     | 0.7959 | 1.1561 | 1.1102 | 0.7864 | 0.9621 | 0.0992 |
| LOC651709  | 0.8377 | 1.2131 | 1.0037 | 0.7940 | 0.9621 | 0.0951 |
| MIR449C    | 0.9461 | 1.0324 | 0.9848 | 0.8852 | 0.9621 | 0.0311 |
| ANO1       | 0.8336 | 1.0608 | 1.0927 | 0.8615 | 0.9622 | 0.0667 |
| USP12      | 0.7971 | 1.1320 | 1.0642 | 0.8554 | 0.9622 | 0.0806 |
| PRL        | 0.9792 | 1.0724 | 0.9161 | 0.8810 | 0.9622 | 0.0420 |
| LOC649242  | 0.8621 | 1.0619 | 1.0100 | 0.9147 | 0.9622 | 0.0452 |
| LOC653817  | 0.9043 | 1.0491 | 1.0386 | 0.8567 | 0.9622 | 0.0482 |
| HRNBP3     | 0.9333 | 0.9758 | 1.1104 | 0.8293 | 0.9622 | 0.0582 |
| ENOX1      | 0.8649 | 1.2681 | 0.8489 | 0.8669 | 0.9622 | 0.1021 |
| LOC1001338 | 0.8934 | 1.0251 | 1.0104 | 0.9197 | 0.9622 | 0.0327 |
| LOC649823  | 0.9151 | 0.9620 | 1.1312 | 0.8404 | 0.9622 | 0.0617 |
| EPB49      | 0.9388 | 1.0289 | 1.0959 | 0.7852 | 0.9622 | 0.0672 |
| LOC730322  | 0.8978 | 1.0916 | 1.0114 | 0.8479 | 0.9622 | 0.0551 |
| DEADC1     | 0.9031 | 1.0975 | 0.9585 | 0.8896 | 0.9622 | 0.0475 |
| LOC728205  | 0.9122 | 0.9318 | 1.1171 | 0.8876 | 0.9622 | 0.0524 |
| RHOXF1     | 1.0328 | 0.9866 | 0.8920 | 0.9373 | 0.9622 | 0.0305 |
| PYY        | 0.9383 | 1.0469 | 0.9891 | 0.8745 | 0.9622 | 0.0367 |
| OR10J1     | 0.9109 | 1.0520 | 0.9610 | 0.9249 | 0.9622 | 0.0317 |
| MIR320C1   | 0.8701 | 1.0011 | 0.9936 | 0.9840 | 0.9622 | 0.0309 |
| MORN3      | 0.9071 | 1.0294 | 1.1075 | 0.8049 | 0.9622 | 0.0667 |
| CBWD6      | 1.0710 | 0.8267 | 1.1099 | 0.8412 | 0.9622 | 0.0745 |
| LOC730153  | 0.9914 | 0.9917 | 0.9719 | 0.8939 | 0.9622 | 0.0232 |
| RASSF9     | 0.8260 | 1.0990 | 1.0067 | 0.9172 | 0.9622 | 0.0586 |
| LOC339799  | 0.9177 | 0.9882 | 0.9449 | 0.9981 | 0.9622 | 0.0188 |
| LOC729162  | 0.9497 | 1.0543 | 1.0513 | 0.7937 | 0.9622 | 0.0612 |
| UNQ9370    | 0.7152 | 1.2607 | 0.9644 | 0.9087 | 0.9622 | 0.1129 |
| LOC1001343 | 0.9292 | 1.1126 | 0.8921 | 0.9152 | 0.9622 | 0.0507 |
| PLTP       | 0.8355 | 1.1203 | 1.0120 | 0.8812 | 0.9622 | 0.0646 |
| LOC649067  | 0.9899 | 1.0200 | 0.8910 | 0.9481 | 0.9623 | 0.0280 |
| TRIM73     | 0.9140 | 1.0719 | 1.0273 | 0.8358 | 0.9623 | 0.0537 |
| C6orf103   | 0.8867 | 1.0387 | 1.0431 | 0.8805 | 0.9623 | 0.0454 |
| LOC728590  | 0.7333 | 1.1661 | 1.3368 | 0.6128 | 0.9623 | 0.1723 |
| HSPC268    | 0.7787 | 1.1475 | 1.1730 | 0.7498 | 0.9623 | 0.1146 |
| LOC392452  | 0.9392 | 0.9336 | 0.9945 | 0.9817 | 0.9623 | 0.0152 |
| LOC1001310 | 1.0075 | 0.9627 | 0.9086 | 0.9703 | 0.9623 | 0.0204 |

|            |        |        |        |        |        |        |
|------------|--------|--------|--------|--------|--------|--------|
| LIPC       | 0.8802 | 1.0983 | 0.9765 | 0.8942 | 0.9623 | 0.0501 |
| C10orf67   | 1.0106 | 1.1330 | 0.9469 | 0.7586 | 0.9623 | 0.0781 |
| PENK       | 0.8534 | 1.0427 | 1.0647 | 0.8883 | 0.9623 | 0.0534 |
| C1orf51    | 0.9344 | 1.0539 | 0.9488 | 0.9121 | 0.9623 | 0.0315 |
| SPANXB2    | 0.9046 | 1.2242 | 0.9872 | 0.7332 | 0.9623 | 0.1021 |
| LCE3D      | 0.9364 | 1.0372 | 0.9958 | 0.8798 | 0.9623 | 0.0344 |
| ATP6V1G3   | 0.8453 | 1.0645 | 1.0202 | 0.9192 | 0.9623 | 0.0495 |
| LOC729839  | 0.8969 | 1.0725 | 0.9739 | 0.9059 | 0.9623 | 0.0406 |
| ANKRD54    | 0.8412 | 1.3900 | 0.8450 | 0.7731 | 0.9623 | 0.1435 |
| LOC254028  | 0.9319 | 1.0639 | 0.9402 | 0.9132 | 0.9623 | 0.0343 |
| GABBR1     | 0.9235 | 1.1169 | 0.9488 | 0.8600 | 0.9623 | 0.0548 |
| SH2D3A     | 0.9164 | 1.0665 | 0.9509 | 0.9155 | 0.9623 | 0.0357 |
| GUSB       | 0.7895 | 1.4345 | 0.9317 | 0.6935 | 0.9623 | 0.1648 |
| CKMT1A     | 0.8641 | 1.3340 | 0.9985 | 0.6526 | 0.9623 | 0.1429 |
| FAM176B    | 0.9251 | 1.1774 | 0.9306 | 0.8161 | 0.9623 | 0.0764 |
| LOC653051  | 0.9788 | 1.0537 | 0.9396 | 0.8773 | 0.9623 | 0.0369 |
| PXMP4      | 0.9193 | 1.0493 | 0.9976 | 0.8832 | 0.9623 | 0.0376 |
| LOC647135  | 0.9251 | 1.0975 | 1.0080 | 0.8187 | 0.9623 | 0.0594 |
| LOC729858  | 0.9395 | 1.0389 | 1.0211 | 0.8499 | 0.9623 | 0.0433 |
| FAM21B     | 0.9334 | 0.9974 | 1.0401 | 0.8784 | 0.9623 | 0.0355 |
| CD48       | 0.9139 | 1.0104 | 1.0195 | 0.9055 | 0.9623 | 0.0305 |
| LRRIQ3     | 0.8877 | 1.0880 | 0.9843 | 0.8894 | 0.9623 | 0.0476 |
| TRPV2      | 0.8549 | 1.1009 | 1.0501 | 0.8436 | 0.9624 | 0.0662 |
| LOC645351  | 0.8416 | 1.2226 | 0.9017 | 0.8835 | 0.9624 | 0.0877 |
| LOC1001326 | 0.9718 | 1.0491 | 0.9855 | 0.8431 | 0.9624 | 0.0432 |
| ANXA8L2    | 0.9344 | 1.0042 | 1.0446 | 0.8662 | 0.9624 | 0.0393 |
| PDE4B      | 0.9489 | 1.0024 | 1.0044 | 0.8937 | 0.9624 | 0.0262 |
| LOC1001315 | 1.0070 | 1.0665 | 0.9441 | 0.8319 | 0.9624 | 0.0502 |
| LOC649203  | 0.8793 | 1.0313 | 1.0409 | 0.8981 | 0.9624 | 0.0428 |
| LOC644532  | 0.8479 | 0.9949 | 1.1055 | 0.9011 | 0.9624 | 0.0566 |
| LOC1001300 | 1.0309 | 0.9410 | 1.0147 | 0.8629 | 0.9624 | 0.0385 |
| TMEM173    | 0.9112 | 1.1461 | 0.9888 | 0.8035 | 0.9624 | 0.0721 |
| CCDC82     | 0.9458 | 1.0148 | 0.9887 | 0.9002 | 0.9624 | 0.0251 |
| HM13       | 0.7090 | 1.3822 | 0.9814 | 0.7769 | 0.9624 | 0.1514 |
| LOC648050  | 0.8100 | 1.0178 | 1.1080 | 0.9138 | 0.9624 | 0.0644 |
| LOC642214  | 0.8328 | 1.1299 | 1.0226 | 0.8643 | 0.9624 | 0.0696 |
| ACE        | 0.9623 | 1.0313 | 1.0040 | 0.8519 | 0.9624 | 0.0395 |
| HSD17B12   | 0.8375 | 1.1342 | 1.1876 | 0.6904 | 0.9624 | 0.1189 |
| LOC653039  | 0.9236 | 0.9444 | 0.9607 | 1.0210 | 0.9624 | 0.0210 |
| HSPC047    | 0.8984 | 1.0525 | 1.0233 | 0.8755 | 0.9624 | 0.0442 |
| LOC645822  | 0.8824 | 1.1420 | 0.9961 | 0.8292 | 0.9624 | 0.0692 |
| PSTPIP2    | 0.8846 | 1.0489 | 0.9925 | 0.9237 | 0.9624 | 0.0364 |
| LOC728677  | 0.8881 | 1.0274 | 1.0129 | 0.9213 | 0.9624 | 0.0341 |
| LOC1001305 | 0.9550 | 0.9957 | 0.9938 | 0.9053 | 0.9624 | 0.0212 |
| FAM90A5    | 0.9030 | 1.0889 | 0.9265 | 0.9314 | 0.9624 | 0.0426 |
| LOC1001325 | 0.9165 | 1.0361 | 1.0254 | 0.8718 | 0.9624 | 0.0405 |

|            |        |        |        |        |        |        |
|------------|--------|--------|--------|--------|--------|--------|
| CXADRP2    | 0.9997 | 0.9808 | 0.9518 | 0.9175 | 0.9624 | 0.0179 |
| SAMSN1     | 0.8994 | 0.9836 | 1.0315 | 0.9353 | 0.9624 | 0.0288 |
| LOC731050  | 0.9318 | 1.0122 | 1.0526 | 0.8532 | 0.9624 | 0.0442 |
| LOC1001301 | 0.8398 | 1.1253 | 1.0285 | 0.8563 | 0.9625 | 0.0690 |
| CD84       | 0.9484 | 1.0898 | 0.9009 | 0.9107 | 0.9625 | 0.0437 |
| PTPN18     | 0.8511 | 1.1235 | 0.9607 | 0.9146 | 0.9625 | 0.0582 |
| LOC387790  | 0.7777 | 1.1415 | 0.8735 | 1.0572 | 0.9625 | 0.0832 |
| TEK        | 0.9631 | 1.0725 | 0.9766 | 0.8378 | 0.9625 | 0.0482 |
| ZNF287     | 0.9224 | 1.0241 | 1.0536 | 0.8499 | 0.9625 | 0.0469 |
| MAFF       | 0.8788 | 1.0370 | 1.0656 | 0.8686 | 0.9625 | 0.0516 |
| FLJ46154   | 0.9141 | 1.0421 | 1.0285 | 0.8653 | 0.9625 | 0.0433 |
| LOC1001289 | 0.9342 | 1.0976 | 0.9769 | 0.8413 | 0.9625 | 0.0532 |
| C1QC       | 0.9671 | 1.0639 | 0.9622 | 0.8568 | 0.9625 | 0.0423 |
| LOC730152  | 0.9118 | 1.0146 | 0.9152 | 1.0084 | 0.9625 | 0.0283 |
| SNORD10    | 1.0329 | 1.0256 | 0.9859 | 0.8056 | 0.9625 | 0.0533 |
| COX18      | 0.9783 | 1.0745 | 0.9426 | 0.8547 | 0.9625 | 0.0455 |
| LOC643336  | 0.7990 | 1.3275 | 0.9946 | 0.7289 | 0.9625 | 0.1340 |
| LOC729828  | 0.9219 | 1.0046 | 0.9752 | 0.9483 | 0.9625 | 0.0178 |
| DYDC2      | 1.0472 | 1.0404 | 0.8980 | 0.8646 | 0.9625 | 0.0474 |
| LOC1001011 | 0.8593 | 1.0332 | 0.9798 | 0.9778 | 0.9625 | 0.0367 |
| RAB27B     | 0.8763 | 1.0604 | 1.0116 | 0.9018 | 0.9625 | 0.0439 |
| LOC1001290 | 0.9230 | 1.1074 | 1.0403 | 0.7794 | 0.9625 | 0.0720 |
| POTEG      | 0.9178 | 1.1268 | 0.9106 | 0.8950 | 0.9625 | 0.0549 |
| LOC286239  | 1.0755 | 1.0198 | 0.9107 | 0.8441 | 0.9625 | 0.0523 |
| ATP6V0A4   | 0.8545 | 1.0402 | 1.0233 | 0.9322 | 0.9625 | 0.0431 |
| LOC284232  | 0.9181 | 1.0439 | 0.9657 | 0.9224 | 0.9625 | 0.0292 |
| LOC400950  | 0.9327 | 1.0415 | 0.9643 | 0.9116 | 0.9625 | 0.0285 |
| LOC439957  | 0.8471 | 1.0814 | 1.0013 | 0.9204 | 0.9625 | 0.0506 |
| IL20RA     | 0.8931 | 1.1368 | 0.8602 | 0.9601 | 0.9625 | 0.0617 |
| LOC1001339 | 0.9027 | 0.9876 | 0.9555 | 1.0045 | 0.9626 | 0.0224 |
| GUCA2B     | 0.9826 | 1.0000 | 0.9959 | 0.8718 | 0.9626 | 0.0305 |
| CYP3A4     | 0.9802 | 1.0091 | 1.0433 | 0.8177 | 0.9626 | 0.0500 |
| MIR616     | 0.9245 | 1.0154 | 1.0303 | 0.8801 | 0.9626 | 0.0361 |
| KRTAP4-11  | 0.9470 | 0.9598 | 1.0001 | 0.9434 | 0.9626 | 0.0130 |
| RPLP0      | 0.8641 | 1.1685 | 1.0092 | 0.8086 | 0.9626 | 0.0806 |
| LOC344423  | 0.9474 | 1.0449 | 0.9210 | 0.9371 | 0.9626 | 0.0280 |
| OR10K1     | 0.9738 | 0.9909 | 0.9924 | 0.8933 | 0.9626 | 0.0235 |
| SCCPDH     | 0.9353 | 1.2628 | 0.9106 | 0.7417 | 0.9626 | 0.1089 |
| SYCP1      | 0.9593 | 1.0042 | 0.9730 | 0.9138 | 0.9626 | 0.0188 |
| LOC652111  | 0.8745 | 1.0294 | 1.0419 | 0.9045 | 0.9626 | 0.0427 |
| LOC729175  | 0.9186 | 1.0803 | 1.0380 | 0.8136 | 0.9626 | 0.0603 |
| LOC646276  | 0.9089 | 1.1385 | 0.9622 | 0.8408 | 0.9626 | 0.0637 |
| KRT6B      | 0.9559 | 1.0898 | 0.9144 | 0.8904 | 0.9626 | 0.0445 |
| LOC1001313 | 0.8521 | 1.1634 | 0.9572 | 0.8777 | 0.9626 | 0.0706 |
| C20orf79   | 1.0192 | 0.9899 | 0.9803 | 0.8610 | 0.9626 | 0.0348 |
| PARD6A     | 0.9164 | 1.2843 | 0.9111 | 0.7386 | 0.9626 | 0.1149 |



|            |        |        |        |        |        |        |
|------------|--------|--------|--------|--------|--------|--------|
| LOC651441  | 0.9058 | 1.0560 | 0.9562 | 0.9325 | 0.9626 | 0.0328 |
| LOC653894  | 0.8365 | 1.0227 | 1.1400 | 0.8513 | 0.9626 | 0.0727 |
| RSPO1      | 0.9025 | 1.0675 | 1.0730 | 0.8075 | 0.9626 | 0.0651 |
| LOC652282  | 0.8211 | 1.1247 | 0.9735 | 0.9312 | 0.9626 | 0.0629 |
| ARL14      | 0.8792 | 1.0139 | 1.0092 | 0.9482 | 0.9626 | 0.0316 |
| LOC643039  | 0.8309 | 1.1404 | 0.9914 | 0.8878 | 0.9626 | 0.0679 |
| PDC        | 0.8925 | 1.0783 | 0.9614 | 0.9184 | 0.9626 | 0.0411 |
| DYRK3      | 0.9084 | 1.0689 | 0.9899 | 0.8834 | 0.9626 | 0.0421 |
| LOC731915  | 0.9619 | 1.0080 | 1.1198 | 0.7609 | 0.9627 | 0.0750 |
| LOC441655  | 0.8290 | 1.0567 | 0.9879 | 0.9770 | 0.9627 | 0.0479 |
| LOC1001326 | 0.9234 | 0.9976 | 1.0479 | 0.8817 | 0.9627 | 0.0372 |
| SRGN       | 0.9124 | 1.0513 | 1.0060 | 0.8809 | 0.9627 | 0.0397 |
| CXorf48    | 0.9321 | 1.0252 | 0.9996 | 0.8938 | 0.9627 | 0.0302 |
| LOC400743  | 0.9422 | 1.1679 | 0.9542 | 0.7864 | 0.9627 | 0.0784 |
| AIP        | 0.7412 | 1.4281 | 0.9151 | 0.7663 | 0.9627 | 0.1598 |
| OR1F2P     | 0.9638 | 1.0210 | 0.9599 | 0.9060 | 0.9627 | 0.0235 |
| DYNC1I1    | 1.0005 | 0.9082 | 1.0747 | 0.8674 | 0.9627 | 0.0466 |
| LOC142937  | 0.8960 | 1.1530 | 0.9086 | 0.8932 | 0.9627 | 0.0635 |
| LOC648600  | 0.9050 | 1.0763 | 0.9894 | 0.8800 | 0.9627 | 0.0445 |
| C2orf14    | 0.9464 | 1.0444 | 0.9977 | 0.8622 | 0.9627 | 0.0390 |
| LRFN5      | 0.8914 | 1.0428 | 0.9931 | 0.9236 | 0.9627 | 0.0341 |
| BIRC8      | 0.9346 | 1.0365 | 0.9722 | 0.9075 | 0.9627 | 0.0279 |
| LOC652184  | 0.9140 | 1.0752 | 0.9864 | 0.8752 | 0.9627 | 0.0440 |
| LOC643672  | 0.8265 | 1.1696 | 0.9272 | 0.9276 | 0.9627 | 0.0729 |
| LOC389906  | 0.9453 | 1.0796 | 0.9940 | 0.8320 | 0.9627 | 0.0517 |
| LOC1001296 | 0.8939 | 1.0287 | 1.0175 | 0.9109 | 0.9627 | 0.0351 |
| GTF2A1L    | 0.8827 | 1.0739 | 1.0169 | 0.8775 | 0.9627 | 0.0491 |
| ZFYVE1     | 0.9259 | 1.1171 | 1.0086 | 0.7994 | 0.9627 | 0.0671 |
| LOC651562  | 0.8440 | 1.1067 | 1.0106 | 0.8897 | 0.9628 | 0.0595 |
| LOC652846  | 1.0213 | 1.0282 | 0.9234 | 0.8782 | 0.9628 | 0.0370 |
| SLC4A8     | 0.9125 | 1.0281 | 1.0547 | 0.8558 | 0.9628 | 0.0472 |
| FGF7       | 0.8594 | 1.0549 | 0.9367 | 1.0001 | 0.9628 | 0.0421 |
| CALHM3     | 0.8553 | 1.0667 | 1.0839 | 0.8452 | 0.9628 | 0.0651 |
| LOC642585  | 0.8960 | 1.0418 | 1.0328 | 0.8805 | 0.9628 | 0.0432 |
| NKX6-1     | 0.8627 | 0.9773 | 1.0600 | 0.9511 | 0.9628 | 0.0406 |
| OR7E156P   | 0.8881 | 1.0795 | 0.9810 | 0.9026 | 0.9628 | 0.0439 |
| ZNF839     | 1.0625 | 1.1469 | 0.8540 | 0.7878 | 0.9628 | 0.0848 |
| LOC392435  | 0.9371 | 1.0551 | 0.9928 | 0.8662 | 0.9628 | 0.0402 |
| SERPINI2   | 0.9876 | 1.0388 | 0.9702 | 0.8546 | 0.9628 | 0.0389 |
| RNF5P1     | 0.9170 | 1.2529 | 0.9079 | 0.7734 | 0.9628 | 0.1021 |
| C14orf48   | 0.8650 | 1.1247 | 0.9796 | 0.8819 | 0.9628 | 0.0596 |
| LOC1001343 | 0.8443 | 0.9726 | 1.0194 | 1.0150 | 0.9628 | 0.0409 |
| OCLM       | 0.8936 | 1.1354 | 0.9430 | 0.8793 | 0.9628 | 0.0591 |
| LOC728820  | 0.6486 | 1.2646 | 1.2828 | 0.6552 | 0.9628 | 0.1795 |
| LOC644886  | 0.9982 | 1.0780 | 0.9536 | 0.8214 | 0.9628 | 0.0537 |
| GPR21      | 1.0179 | 1.0355 | 0.9463 | 0.8517 | 0.9628 | 0.0418 |

|            |        |        |        |        |        |        |
|------------|--------|--------|--------|--------|--------|--------|
| C10orf107  | 0.9872 | 0.9710 | 0.9904 | 0.9029 | 0.9628 | 0.0204 |
| ZNF514     | 0.9011 | 1.0567 | 1.0270 | 0.8665 | 0.9628 | 0.0466 |
| LOC642653  | 0.8968 | 0.9441 | 0.9872 | 1.0233 | 0.9628 | 0.0273 |
| LOC118945  | 0.8483 | 1.0936 | 1.0256 | 0.8840 | 0.9628 | 0.0580 |
| LOC1001335 | 0.8517 | 1.0351 | 1.0824 | 0.8822 | 0.9628 | 0.0566 |
| OR51T1     | 0.9111 | 0.9607 | 1.1108 | 0.8687 | 0.9628 | 0.0528 |
| SERINC5    | 0.9133 | 1.0512 | 0.9760 | 0.9110 | 0.9629 | 0.0331 |
| CYTIP      | 0.8537 | 1.1086 | 0.9999 | 0.8892 | 0.9629 | 0.0577 |
| C4orf47    | 0.8693 | 1.0120 | 1.0879 | 0.8823 | 0.9629 | 0.0527 |
| FLJ45994   | 1.0259 | 0.9342 | 0.9974 | 0.8939 | 0.9629 | 0.0299 |
| GNAT3      | 0.9469 | 1.0037 | 0.9567 | 0.9441 | 0.9629 | 0.0139 |
| LOC643146  | 0.9112 | 1.0353 | 0.9687 | 0.9363 | 0.9629 | 0.0269 |
| LOC647655  | 0.9321 | 1.0306 | 0.9941 | 0.8946 | 0.9629 | 0.0305 |
| CFHR3      | 0.8844 | 1.0723 | 1.0115 | 0.8833 | 0.9629 | 0.0473 |
| C1orf74    | 0.9102 | 1.1710 | 1.0205 | 0.7498 | 0.9629 | 0.0889 |
| LOC644974  | 0.9689 | 0.9521 | 1.0248 | 0.9057 | 0.9629 | 0.0246 |
| LOC1001307 | 0.9779 | 0.9006 | 1.0404 | 0.9326 | 0.9629 | 0.0303 |
| MIR148A    | 0.9211 | 0.9855 | 1.0370 | 0.9079 | 0.9629 | 0.0300 |
| OR2B3P     | 0.8537 | 1.0588 | 1.0301 | 0.9090 | 0.9629 | 0.0488 |
| LOC149837  | 0.9309 | 1.0563 | 1.0167 | 0.8477 | 0.9629 | 0.0465 |
| AHDC1      | 0.9723 | 1.0707 | 0.8961 | 0.9124 | 0.9629 | 0.0395 |
| LOC650885  | 0.9136 | 1.0777 | 0.9530 | 0.9072 | 0.9629 | 0.0396 |
| ARL9       | 0.9384 | 0.9837 | 1.0206 | 0.9088 | 0.9629 | 0.0247 |
| GPR150     | 0.8339 | 1.1298 | 1.0003 | 0.8877 | 0.9629 | 0.0655 |
| SEBOX      | 0.9767 | 1.0377 | 0.9686 | 0.8686 | 0.9629 | 0.0350 |
| LOC1001321 | 0.9085 | 1.1526 | 0.9383 | 0.8522 | 0.9629 | 0.0657 |
| LOC440905  | 0.8909 | 1.0535 | 0.9603 | 0.9469 | 0.9629 | 0.0337 |
| HAO2       | 0.9620 | 1.0303 | 0.9832 | 0.8762 | 0.9629 | 0.0322 |
| PAK6       | 0.9247 | 1.0452 | 0.9899 | 0.8918 | 0.9629 | 0.0342 |
| LOC644856  | 0.8964 | 0.9792 | 0.9474 | 1.0286 | 0.9629 | 0.0278 |
| TRIAP1     | 0.8362 | 1.2043 | 1.0645 | 0.7466 | 0.9629 | 0.1047 |
| LOC1001316 | 0.9064 | 1.0458 | 1.0000 | 0.8994 | 0.9629 | 0.0359 |
| IMMP2L     | 0.8779 | 1.2979 | 0.9683 | 0.7075 | 0.9629 | 0.1241 |
| ADAR       | 0.8728 | 1.2916 | 0.9776 | 0.7097 | 0.9629 | 0.1226 |
| SRPK3      | 0.9310 | 0.9932 | 0.9885 | 0.9390 | 0.9629 | 0.0162 |
| HIST1H2AL  | 0.9526 | 1.0109 | 1.0355 | 0.8526 | 0.9629 | 0.0407 |
| C14orf169  | 0.9384 | 1.0909 | 0.9268 | 0.8956 | 0.9629 | 0.0436 |
| LOC1001307 | 0.9798 | 1.0706 | 0.9372 | 0.8641 | 0.9629 | 0.0431 |
| LOC729570  | 0.9248 | 1.2069 | 0.9135 | 0.8065 | 0.9629 | 0.0856 |
| GNB4       | 0.8789 | 1.1207 | 0.9871 | 0.8652 | 0.9629 | 0.0592 |
| ALDH1L2    | 0.9121 | 0.9947 | 1.0354 | 0.9096 | 0.9629 | 0.0312 |
| LOC400858  | 0.8376 | 1.0856 | 0.9836 | 0.9449 | 0.9629 | 0.0512 |
| LOC643959  | 1.0189 | 0.9492 | 0.9847 | 0.8991 | 0.9629 | 0.0256 |
| LOC1001306 | 0.8868 | 1.0728 | 0.9697 | 0.9225 | 0.9629 | 0.0404 |
| ADAMTS15   | 0.8966 | 1.1458 | 0.9445 | 0.8649 | 0.9629 | 0.0631 |
| LOC1001295 | 0.9937 | 1.0848 | 0.9423 | 0.8310 | 0.9630 | 0.0529 |

|            |        |        |        |        |        |        |
|------------|--------|--------|--------|--------|--------|--------|
| DLL4       | 0.8943 | 1.1003 | 0.8950 | 0.9622 | 0.9630 | 0.0485 |
| LOC728836  | 1.0367 | 0.9831 | 0.8873 | 0.9448 | 0.9630 | 0.0315 |
| SCARNA5    | 0.9668 | 0.9977 | 0.9710 | 0.9164 | 0.9630 | 0.0170 |
| ACVRL1     | 0.8689 | 1.0814 | 1.0172 | 0.8844 | 0.9630 | 0.0516 |
| ZMYM2      | 0.7769 | 1.4321 | 0.9579 | 0.6851 | 0.9630 | 0.1663 |
| LOC728970  | 0.9553 | 0.9580 | 1.0387 | 0.8999 | 0.9630 | 0.0286 |
| PTPRU      | 0.7637 | 1.2007 | 0.9925 | 0.8950 | 0.9630 | 0.0921 |
| LOC644311  | 0.8935 | 1.0481 | 0.9958 | 0.9146 | 0.9630 | 0.0359 |
| AKR1B1     | 0.8916 | 1.0641 | 1.0548 | 0.8415 | 0.9630 | 0.0566 |
| IGFBPL1    | 0.9204 | 1.0150 | 1.0303 | 0.8863 | 0.9630 | 0.0353 |
| FRYL       | 0.9003 | 1.1326 | 0.9771 | 0.8419 | 0.9630 | 0.0629 |
| LOC727836  | 0.9962 | 1.0753 | 0.9772 | 0.8033 | 0.9630 | 0.0573 |
| CSTB       | 0.8209 | 1.2223 | 0.9779 | 0.8309 | 0.9630 | 0.0936 |
| MIR137     | 0.9436 | 1.0627 | 0.9213 | 0.9245 | 0.9630 | 0.0336 |
| RHOBTB1    | 0.9191 | 1.1040 | 0.9855 | 0.8434 | 0.9630 | 0.0552 |
| EMILIN2    | 0.9606 | 1.0175 | 1.0405 | 0.8334 | 0.9630 | 0.0463 |
| LOC653537  | 0.9348 | 1.0014 | 0.9815 | 0.9343 | 0.9630 | 0.0169 |
| C1QTNF2    | 0.9469 | 1.0436 | 0.9436 | 0.9180 | 0.9630 | 0.0276 |
| LOC1001292 | 0.8850 | 1.1256 | 1.0116 | 0.8298 | 0.9630 | 0.0662 |
| ETV4       | 0.8972 | 1.0194 | 1.0554 | 0.8800 | 0.9630 | 0.0437 |
| LOC642335  | 0.9161 | 1.0102 | 0.9908 | 0.9350 | 0.9630 | 0.0223 |
| LOC646890  | 0.9811 | 1.0351 | 0.9422 | 0.8936 | 0.9630 | 0.0300 |
| PCDHB1     | 0.8411 | 1.0381 | 1.0039 | 0.9691 | 0.9630 | 0.0430 |
| MGC34829   | 0.8513 | 1.0646 | 0.9719 | 0.9644 | 0.9630 | 0.0437 |
| LOC729780  | 0.9209 | 1.0453 | 1.1200 | 0.7659 | 0.9630 | 0.0775 |
| OSGIN2     | 0.7906 | 1.3022 | 0.9756 | 0.7838 | 0.9630 | 0.1215 |
| LRRC6      | 0.9652 | 1.0755 | 0.9237 | 0.8878 | 0.9630 | 0.0407 |
| MUC5B      | 0.8871 | 1.1619 | 0.9645 | 0.8387 | 0.9630 | 0.0712 |
| LOC1001311 | 0.8831 | 1.0736 | 0.9527 | 0.9428 | 0.9631 | 0.0399 |
| TBL1Y      | 0.9373 | 1.0526 | 1.0406 | 0.8217 | 0.9631 | 0.0537 |
| LOC164380  | 0.9889 | 1.0775 | 0.9304 | 0.8554 | 0.9631 | 0.0469 |
| ZNF169     | 0.8618 | 1.0437 | 0.9980 | 0.9488 | 0.9631 | 0.0389 |
| LOC652161  | 0.9794 | 0.9811 | 0.9736 | 0.9181 | 0.9631 | 0.0151 |
| KCNT1      | 0.9084 | 1.0492 | 1.0341 | 0.8605 | 0.9631 | 0.0465 |
| LOC1001292 | 0.7444 | 1.1049 | 1.0599 | 0.9430 | 0.9631 | 0.0805 |
| LOC642105  | 0.9110 | 1.0034 | 1.0610 | 0.8768 | 0.9631 | 0.0422 |
| LOC731670  | 0.9189 | 1.0334 | 0.9853 | 0.9147 | 0.9631 | 0.0285 |
| LOC649248  | 0.9767 | 1.0507 | 0.9712 | 0.8537 | 0.9631 | 0.0407 |
| TBX22      | 0.8961 | 1.1164 | 0.9198 | 0.9200 | 0.9631 | 0.0514 |
| LOC136288  | 0.8910 | 1.0862 | 0.9877 | 0.8874 | 0.9631 | 0.0472 |
| LOC644122  | 0.9154 | 1.0584 | 0.9745 | 0.9040 | 0.9631 | 0.0353 |
| VPS45      | 0.9371 | 1.4411 | 0.8137 | 0.6604 | 0.9631 | 0.1691 |
| LOC116412  | 0.9528 | 1.0105 | 1.0349 | 0.8542 | 0.9631 | 0.0402 |
| NPY5R      | 0.8730 | 1.1830 | 0.9536 | 0.8428 | 0.9631 | 0.0769 |
| HTA        | 1.0276 | 1.0687 | 0.9072 | 0.8488 | 0.9631 | 0.0512 |
| LOC441347  | 0.9295 | 1.0705 | 1.0171 | 0.8352 | 0.9631 | 0.0516 |

|            |        |        |        |        |        |        |
|------------|--------|--------|--------|--------|--------|--------|
| LOC642961  | 0.9252 | 1.0298 | 1.0403 | 0.8572 | 0.9631 | 0.0438 |
| SNORD1C    | 0.7622 | 1.0511 | 1.1107 | 0.9284 | 0.9631 | 0.0770 |
| CDC2L2     | 0.8933 | 1.2230 | 0.9487 | 0.7874 | 0.9631 | 0.0929 |
| LOC1001282 | 0.8739 | 1.0371 | 1.0751 | 0.8664 | 0.9631 | 0.0543 |
| USF2       | 1.0255 | 1.1614 | 0.9476 | 0.7180 | 0.9631 | 0.0929 |
| HIST1H3G   | 0.7956 | 1.1268 | 0.9949 | 0.9352 | 0.9631 | 0.0687 |
| LRRC30     | 0.9364 | 0.9125 | 1.0023 | 1.0014 | 0.9631 | 0.0229 |
| LOC647400  | 0.9431 | 1.0595 | 1.0544 | 0.7956 | 0.9631 | 0.0620 |
| KRTAP9-3   | 0.8942 | 0.9733 | 1.0377 | 0.9475 | 0.9632 | 0.0298 |
| LOC391004  | 0.9285 | 0.9700 | 1.0281 | 0.9262 | 0.9632 | 0.0239 |
| LOC644057  | 0.9706 | 0.9352 | 1.0125 | 0.9344 | 0.9632 | 0.0185 |
| LOC643623  | 0.8757 | 1.0799 | 1.0319 | 0.8652 | 0.9632 | 0.0545 |
| SOX11      | 0.9592 | 1.0990 | 0.8799 | 0.9146 | 0.9632 | 0.0481 |
| LOC730121  | 1.0782 | 1.0392 | 0.9312 | 0.8041 | 0.9632 | 0.0615 |
| FBP1       | 0.8931 | 1.1310 | 0.9432 | 0.8854 | 0.9632 | 0.0574 |
| RGS8       | 0.8850 | 1.0958 | 0.8786 | 0.9933 | 0.9632 | 0.0515 |
| COL6A3     | 0.9225 | 1.0954 | 0.9437 | 0.8912 | 0.9632 | 0.0454 |
| SYCE1      | 0.9167 | 1.1164 | 0.9469 | 0.8728 | 0.9632 | 0.0533 |
| VAMP4      | 0.8719 | 1.1511 | 1.0324 | 0.7975 | 0.9632 | 0.0795 |
| PPP4R1L    | 0.8903 | 1.0917 | 0.9700 | 0.9009 | 0.9632 | 0.0463 |
| RPS12      | 0.9342 | 0.9773 | 1.0525 | 0.8888 | 0.9632 | 0.0348 |
| IL1F6      | 0.9182 | 1.0502 | 1.0141 | 0.8704 | 0.9632 | 0.0416 |
| LOC652540  | 0.8910 | 1.0462 | 0.9618 | 0.9540 | 0.9632 | 0.0319 |
| LOC642616  | 0.9316 | 0.9966 | 0.9742 | 0.9505 | 0.9632 | 0.0141 |
| STK33      | 0.8802 | 1.2423 | 0.9033 | 0.8272 | 0.9632 | 0.0944 |
| GBP6       | 0.9394 | 1.0426 | 0.9357 | 0.9352 | 0.9632 | 0.0265 |
| LOC646956  | 0.9680 | 1.0378 | 0.9846 | 0.8625 | 0.9632 | 0.0367 |
| GLB1L      | 0.8352 | 1.2044 | 0.9574 | 0.8559 | 0.9632 | 0.0847 |
| MIR550-2   | 0.8909 | 1.1356 | 0.9027 | 0.9236 | 0.9632 | 0.0579 |
| ID2B       | 0.9390 | 1.1127 | 1.0632 | 0.7381 | 0.9632 | 0.0835 |
| LOC1001294 | 0.9099 | 1.0367 | 0.9910 | 0.9154 | 0.9632 | 0.0307 |
| SLC25A32   | 1.0066 | 1.0467 | 0.9362 | 0.8634 | 0.9632 | 0.0404 |
| C1orf226   | 0.8821 | 0.9981 | 1.0640 | 0.9088 | 0.9632 | 0.0417 |
| BRPF3      | 0.8444 | 1.4830 | 0.8815 | 0.6441 | 0.9633 | 0.1809 |
| LOC646262  | 0.7967 | 1.1085 | 1.0140 | 0.9339 | 0.9633 | 0.0660 |
| SIGLEC1    | 0.9369 | 1.0648 | 0.9356 | 0.9156 | 0.9633 | 0.0342 |
| TSC2       | 0.8235 | 1.5158 | 0.9118 | 0.6018 | 0.9633 | 0.1954 |
| FLJ45121   | 0.8856 | 1.0136 | 1.0462 | 0.9076 | 0.9633 | 0.0393 |
| SIGLEC6    | 0.8929 | 1.0158 | 1.0066 | 0.9378 | 0.9633 | 0.0292 |
| MAGI2      | 0.9483 | 0.9719 | 1.0728 | 0.8601 | 0.9633 | 0.0437 |
| LOC645964  | 1.0186 | 0.9936 | 1.0069 | 0.8340 | 0.9633 | 0.0434 |
| UBTFL2     | 0.9615 | 1.1221 | 0.9198 | 0.8496 | 0.9633 | 0.0578 |
| MIR374A    | 0.9685 | 1.0796 | 0.9096 | 0.8955 | 0.9633 | 0.0419 |
| S100G      | 0.8648 | 1.0394 | 1.0680 | 0.8809 | 0.9633 | 0.0526 |
| LCP2       | 0.8996 | 1.1359 | 1.0183 | 0.7994 | 0.9633 | 0.0729 |
| PAGE1      | 0.8717 | 1.1952 | 0.9743 | 0.8120 | 0.9633 | 0.0842 |

|            |        |        |        |        |        |        |
|------------|--------|--------|--------|--------|--------|--------|
| LOC649851  | 0.9405 | 1.0531 | 1.0442 | 0.8154 | 0.9633 | 0.0555 |
| CENPJ      | 0.9067 | 1.0865 | 1.0234 | 0.8367 | 0.9633 | 0.0563 |
| KIAA1202   | 0.9619 | 1.0883 | 0.8595 | 0.9436 | 0.9633 | 0.0472 |
| PLXNA4     | 0.8819 | 1.0882 | 0.9937 | 0.8894 | 0.9633 | 0.0488 |
| KCNQ4      | 0.8714 | 1.0575 | 1.0226 | 0.9017 | 0.9633 | 0.0453 |
| LOC650834  | 0.9482 | 0.9870 | 1.0660 | 0.8521 | 0.9633 | 0.0444 |
| SLC36A2    | 1.0330 | 1.0605 | 0.9026 | 0.8572 | 0.9633 | 0.0494 |
| LOC642109  | 0.9320 | 1.0050 | 1.0839 | 0.8324 | 0.9633 | 0.0535 |
| NDUFB11    | 0.7514 | 1.3259 | 0.9998 | 0.7762 | 0.9634 | 0.1331 |
| LOC1001302 | 0.8589 | 1.0680 | 1.0754 | 0.8510 | 0.9634 | 0.0626 |
| MAP4       | 0.9154 | 1.1410 | 0.9482 | 0.8489 | 0.9634 | 0.0627 |
| LOC401561  | 0.8246 | 1.2733 | 0.9247 | 0.8308 | 0.9634 | 0.1058 |
| LPPR1      | 0.8878 | 1.1528 | 0.9672 | 0.8456 | 0.9634 | 0.0680 |
| MBIP       | 0.8920 | 1.1521 | 1.0723 | 0.7371 | 0.9634 | 0.0930 |
| PALM2      | 0.9107 | 1.1127 | 0.9863 | 0.8438 | 0.9634 | 0.0577 |
| LOC645196  | 1.0471 | 0.9867 | 0.8813 | 0.9384 | 0.9634 | 0.0353 |
| DIO2       | 0.8613 | 1.0847 | 0.9961 | 0.9114 | 0.9634 | 0.0491 |
| LOC649784  | 0.9569 | 1.0069 | 1.0203 | 0.8694 | 0.9634 | 0.0342 |
| TSHB       | 0.9336 | 0.9806 | 0.9842 | 0.9552 | 0.9634 | 0.0118 |
| SIT1       | 1.0356 | 1.0609 | 0.9123 | 0.8447 | 0.9634 | 0.0512 |
| LOC643879  | 0.8198 | 1.0237 | 0.9211 | 1.0889 | 0.9634 | 0.0590 |
| LOC643935  | 0.8814 | 1.0616 | 1.0388 | 0.8718 | 0.9634 | 0.0504 |
| LOC1001311 | 1.0089 | 1.0239 | 1.0125 | 0.8082 | 0.9634 | 0.0518 |
| CSRNP3     | 0.9090 | 1.0795 | 1.0298 | 0.8352 | 0.9634 | 0.0557 |
| HABP2      | 0.8757 | 1.0193 | 1.0885 | 0.8702 | 0.9634 | 0.0541 |
| RAB33B     | 0.8946 | 1.0542 | 1.1596 | 0.7452 | 0.9634 | 0.0909 |
| LPHN3      | 0.9111 | 1.0218 | 1.0390 | 0.8817 | 0.9634 | 0.0393 |
| RNF157     | 0.8692 | 1.0837 | 1.0149 | 0.8858 | 0.9634 | 0.0516 |
| LOC646353  | 0.8921 | 1.0487 | 0.9424 | 0.9704 | 0.9634 | 0.0327 |
| LOC728910  | 0.9247 | 1.1004 | 0.9399 | 0.8886 | 0.9634 | 0.0469 |
| LRRC19     | 0.9293 | 1.0357 | 1.0295 | 0.8592 | 0.9634 | 0.0424 |
| HIST2H4B   | 0.6985 | 1.4391 | 1.0519 | 0.6642 | 0.9634 | 0.1811 |
| LOC1001446 | 1.0264 | 1.0342 | 0.9204 | 0.8728 | 0.9634 | 0.0398 |
| TUBD1      | 0.8374 | 1.1649 | 1.0300 | 0.8216 | 0.9635 | 0.0822 |
| SAA1       | 0.9495 | 1.0846 | 0.9431 | 0.8766 | 0.9635 | 0.0436 |
| GJB3       | 0.8780 | 1.1269 | 0.9316 | 0.9172 | 0.9635 | 0.0557 |
| LOC220416  | 0.8092 | 1.0350 | 1.0749 | 0.9347 | 0.9635 | 0.0593 |
| LOC388002  | 0.9532 | 1.0448 | 0.9891 | 0.8668 | 0.9635 | 0.0373 |
| C4orf26    | 0.9466 | 1.1253 | 0.9464 | 0.8355 | 0.9635 | 0.0600 |
| SLC12A5    | 0.9352 | 1.0523 | 0.9896 | 0.8768 | 0.9635 | 0.0375 |
| TMTC1      | 0.8850 | 1.1088 | 1.0320 | 0.8281 | 0.9635 | 0.0647 |
| C12orf69   | 0.9647 | 1.0685 | 0.9464 | 0.8743 | 0.9635 | 0.0401 |
| LOC653680  | 0.9278 | 1.0823 | 0.9203 | 0.9236 | 0.9635 | 0.0396 |
| CTXN3      | 0.8953 | 1.0934 | 0.9318 | 0.9334 | 0.9635 | 0.0442 |
| LOC652231  | 0.8556 | 1.0676 | 0.9879 | 0.9429 | 0.9635 | 0.0443 |
| C1orf180   | 0.8983 | 1.0467 | 1.0972 | 0.8118 | 0.9635 | 0.0659 |

|            |        |        |        |        |        |        |
|------------|--------|--------|--------|--------|--------|--------|
| ARHGEF11   | 0.8775 | 1.1380 | 1.0462 | 0.7923 | 0.9635 | 0.0785 |
| RTEL1      | 0.8492 | 1.1277 | 1.0567 | 0.8204 | 0.9635 | 0.0759 |
| LOC388532  | 0.6598 | 1.1419 | 1.3451 | 0.7071 | 0.9635 | 0.1672 |
| ERCC-00004 | 0.8936 | 1.0060 | 1.0601 | 0.8943 | 0.9635 | 0.0416 |
| SAGE1      | 0.9093 | 0.9690 | 0.9929 | 0.9828 | 0.9635 | 0.0187 |
| LIMD2      | 0.9316 | 0.9722 | 0.9716 | 0.9786 | 0.9635 | 0.0107 |
| LOC643814  | 0.9685 | 0.9319 | 1.0158 | 0.9379 | 0.9635 | 0.0192 |
| LOC440742  | 0.9599 | 1.0900 | 0.9830 | 0.8211 | 0.9635 | 0.0553 |
| LOC646766  | 0.9291 | 1.1856 | 0.9303 | 0.8090 | 0.9635 | 0.0793 |
| KRTAP23-1  | 0.9177 | 1.0107 | 1.0338 | 0.8918 | 0.9635 | 0.0346 |
| LOC400352  | 0.8981 | 1.0580 | 1.0427 | 0.8553 | 0.9635 | 0.0510 |
| ST18       | 0.8169 | 1.1252 | 1.0261 | 0.8859 | 0.9635 | 0.0693 |
| LOC653734  | 0.8572 | 1.0496 | 1.0454 | 0.9019 | 0.9635 | 0.0493 |
| WFDC10A    | 0.9387 | 0.9838 | 0.9700 | 0.9616 | 0.9635 | 0.0095 |
| LOC643320  | 0.9631 | 0.9667 | 1.0320 | 0.8924 | 0.9635 | 0.0285 |
| LOC644958  | 0.9873 | 1.0608 | 0.9490 | 0.8570 | 0.9635 | 0.0424 |
| LOC644059  | 0.8555 | 1.0339 | 1.0851 | 0.8797 | 0.9635 | 0.0566 |
| KIAA1274   | 0.8716 | 1.1429 | 1.0098 | 0.8300 | 0.9635 | 0.0711 |
| LOC652102  | 0.9324 | 0.9908 | 0.9831 | 0.9479 | 0.9635 | 0.0140 |
| LOC399936  | 0.9211 | 1.0684 | 0.9860 | 0.8787 | 0.9636 | 0.0413 |
| C13orf33   | 0.9241 | 1.0005 | 1.0058 | 0.9238 | 0.9636 | 0.0229 |
| LOC653941  | 0.9328 | 1.1340 | 0.9998 | 0.7877 | 0.9636 | 0.0720 |
| ZNF655     | 0.9609 | 1.0812 | 0.9371 | 0.8751 | 0.9636 | 0.0432 |
| DMXL1      | 0.8255 | 1.1176 | 0.9807 | 0.9305 | 0.9636 | 0.0607 |
| LOC346887  | 0.8472 | 1.1149 | 1.0269 | 0.8654 | 0.9636 | 0.0646 |
| PLA2G12A   | 0.8751 | 1.1468 | 1.0450 | 0.7874 | 0.9636 | 0.0812 |
| FNDC5      | 0.9741 | 0.9911 | 1.0159 | 0.8732 | 0.9636 | 0.0313 |
| SYNC1      | 0.9470 | 1.0448 | 1.0154 | 0.8472 | 0.9636 | 0.0439 |
| PLD5       | 0.8660 | 1.0522 | 1.0932 | 0.8429 | 0.9636 | 0.0637 |
| LOC642869  | 0.9262 | 1.2062 | 0.9455 | 0.7765 | 0.9636 | 0.0893 |
| LOC642187  | 0.9389 | 1.0193 | 1.0052 | 0.8910 | 0.9636 | 0.0299 |
| LOC1001341 | 0.9036 | 1.0875 | 1.0581 | 0.8051 | 0.9636 | 0.0665 |
| NOL6       | 0.9829 | 1.1805 | 0.9715 | 0.7194 | 0.9636 | 0.0945 |
| OR8D1      | 0.9168 | 1.1345 | 0.9896 | 0.8135 | 0.9636 | 0.0675 |
| AMOTL1     | 0.9861 | 1.0997 | 0.9986 | 0.7700 | 0.9636 | 0.0694 |
| LOC338667  | 0.9460 | 1.1229 | 0.9970 | 0.7886 | 0.9636 | 0.0692 |
| MIR54812   | 0.9106 | 1.0680 | 1.0051 | 0.8709 | 0.9636 | 0.0447 |
| LOC652879  | 0.8817 | 1.0575 | 0.9916 | 0.9238 | 0.9636 | 0.0386 |
| LOC644024  | 0.8425 | 1.0789 | 1.0716 | 0.8615 | 0.9636 | 0.0646 |
| LOC649186  | 0.9507 | 1.0360 | 1.0331 | 0.8349 | 0.9636 | 0.0473 |
| SUNC1      | 0.9392 | 1.0534 | 0.9927 | 0.8693 | 0.9637 | 0.0391 |
| ERCC-00061 | 0.9364 | 1.0313 | 0.9677 | 0.9191 | 0.9637 | 0.0247 |
| RAPGEF4    | 0.8488 | 1.0778 | 1.0991 | 0.8289 | 0.9637 | 0.0723 |
| LOC652383  | 0.9302 | 1.1224 | 0.9003 | 0.9017 | 0.9637 | 0.0534 |
| LOC126860  | 0.9291 | 1.1022 | 0.9407 | 0.8827 | 0.9637 | 0.0478 |
| LOC646572  | 0.8864 | 0.9684 | 1.0712 | 0.9288 | 0.9637 | 0.0395 |

|            |        |        |        |        |        |        |
|------------|--------|--------|--------|--------|--------|--------|
| LOC1001340 | 0.8762 | 1.0156 | 1.0404 | 0.9224 | 0.9637 | 0.0387 |
| LOC728934  | 0.9030 | 1.1686 | 0.9280 | 0.8551 | 0.9637 | 0.0700 |
| LOC642795  | 0.8534 | 1.0008 | 1.1168 | 0.8837 | 0.9637 | 0.0601 |
| GALP       | 0.8944 | 1.0424 | 0.9918 | 0.9261 | 0.9637 | 0.0332 |
| LOC645093  | 0.9275 | 0.9656 | 1.0192 | 0.9424 | 0.9637 | 0.0201 |
| LOC644191  | 0.8334 | 1.2943 | 1.0743 | 0.6527 | 0.9637 | 0.1400 |
| LOC728105  | 0.8841 | 1.2008 | 0.8727 | 0.8972 | 0.9637 | 0.0792 |
| TMEM220    | 0.9212 | 1.0028 | 1.0478 | 0.8830 | 0.9637 | 0.0376 |
| INTU       | 0.8381 | 1.1792 | 1.0270 | 0.8105 | 0.9637 | 0.0864 |
| LOC727851  | 0.9860 | 0.9858 | 0.9981 | 0.8850 | 0.9637 | 0.0264 |
| LOC728951  | 0.8978 | 1.0717 | 0.9707 | 0.9146 | 0.9637 | 0.0392 |
| FLJ36031   | 0.8940 | 1.0007 | 1.0452 | 0.9150 | 0.9637 | 0.0356 |
| LOC651825  | 0.9513 | 1.0749 | 0.9464 | 0.8823 | 0.9637 | 0.0403 |
| CASP12     | 0.9509 | 0.9725 | 0.9908 | 0.9407 | 0.9637 | 0.0112 |
| C1orf182   | 0.8567 | 1.2764 | 0.9465 | 0.7754 | 0.9637 | 0.1099 |
| CABP2      | 0.9518 | 1.0362 | 1.0521 | 0.8148 | 0.9637 | 0.0543 |
| LOC645893  | 0.9841 | 1.0204 | 0.9464 | 0.9042 | 0.9637 | 0.0250 |
| LOC642365  | 0.8999 | 1.0306 | 1.0581 | 0.8665 | 0.9637 | 0.0474 |
| NR1I3      | 0.9178 | 0.9784 | 1.0089 | 0.9499 | 0.9637 | 0.0195 |
| MAGEC1     | 0.8814 | 1.0554 | 1.0234 | 0.8947 | 0.9638 | 0.0443 |
| FADS3      | 1.0294 | 1.0880 | 1.0152 | 0.7224 | 0.9638 | 0.0820 |
| LOC728468  | 0.9981 | 1.0039 | 0.9527 | 0.9004 | 0.9638 | 0.0240 |
| LOC652373  | 0.9702 | 0.9435 | 1.0189 | 0.9225 | 0.9638 | 0.0208 |
| LOC647384  | 0.8857 | 1.0934 | 1.0022 | 0.8739 | 0.9638 | 0.0520 |
| LOC1001313 | 0.8606 | 1.0620 | 0.9236 | 1.0090 | 0.9638 | 0.0447 |
| C10orf84   | 0.9859 | 1.1306 | 0.9139 | 0.8249 | 0.9638 | 0.0646 |
| LOC642673  | 0.9137 | 1.0096 | 1.0232 | 0.9088 | 0.9638 | 0.0305 |
| FAM125B    | 0.8402 | 1.2069 | 0.9149 | 0.8933 | 0.9638 | 0.0825 |
| AGAP2      | 0.9320 | 1.0285 | 1.0171 | 0.8777 | 0.9638 | 0.0359 |
| NTF5       | 0.9282 | 1.0601 | 0.9449 | 0.9221 | 0.9638 | 0.0324 |
| C8orf49    | 0.8874 | 1.0776 | 1.0128 | 0.8775 | 0.9638 | 0.0488 |
| LOC652620  | 0.8408 | 1.0347 | 0.9778 | 1.0020 | 0.9638 | 0.0426 |
| LOC440456  | 0.8746 | 1.0344 | 0.9880 | 0.9583 | 0.9638 | 0.0336 |
| CYP3A5     | 0.9800 | 1.0026 | 1.0070 | 0.8657 | 0.9638 | 0.0332 |
| LOC400120  | 0.8168 | 1.0912 | 1.1116 | 0.8358 | 0.9638 | 0.0796 |
| LOC651293  | 0.9356 | 0.9744 | 1.0497 | 0.8957 | 0.9638 | 0.0328 |
| RNU2-1     | 0.9259 | 1.0189 | 0.9472 | 0.9634 | 0.9638 | 0.0199 |
| LOC346157  | 0.9065 | 1.0341 | 1.1182 | 0.7965 | 0.9638 | 0.0707 |
| LOC652886  | 1.0076 | 0.9740 | 1.0018 | 0.8720 | 0.9638 | 0.0315 |
| C6orf12    | 0.8735 | 1.0598 | 0.9962 | 0.9260 | 0.9639 | 0.0407 |
| CREB3L3    | 0.9578 | 1.1125 | 0.8546 | 0.9305 | 0.9639 | 0.0541 |
| DEFA6      | 0.8550 | 1.0157 | 1.0303 | 0.9544 | 0.9639 | 0.0398 |
| IL21R      | 0.9045 | 1.0865 | 0.9772 | 0.8873 | 0.9639 | 0.0453 |
| SH2B1      | 1.0593 | 0.9677 | 0.9659 | 0.8625 | 0.9639 | 0.0402 |
| SLC26A2    | 0.9265 | 1.0051 | 1.0834 | 0.8405 | 0.9639 | 0.0521 |
| LOC1001347 | 0.9106 | 1.0929 | 0.9624 | 0.8896 | 0.9639 | 0.0456 |

|            |        |        |        |        |        |        |
|------------|--------|--------|--------|--------|--------|--------|
| PLEKHA4    | 0.9461 | 1.0213 | 1.0323 | 0.8558 | 0.9639 | 0.0408 |
| RXFP3      | 0.9589 | 1.0095 | 1.0212 | 0.8658 | 0.9639 | 0.0354 |
| MGAM       | 0.8603 | 1.0365 | 1.0010 | 0.9578 | 0.9639 | 0.0381 |
| LOC652833  | 0.9800 | 0.9391 | 0.9923 | 0.9442 | 0.9639 | 0.0131 |
| FOXL1      | 0.9993 | 0.9862 | 1.0369 | 0.8332 | 0.9639 | 0.0449 |
| OR4F4      | 0.9111 | 1.1114 | 0.9728 | 0.8604 | 0.9639 | 0.0543 |
| CSN1S2A    | 0.8963 | 1.1291 | 0.8920 | 0.9382 | 0.9639 | 0.0560 |
| LOC727751  | 0.8023 | 1.1335 | 1.0480 | 0.8718 | 0.9639 | 0.0766 |
| C9orf144B  | 0.8884 | 0.9596 | 1.0988 | 0.9089 | 0.9639 | 0.0474 |
| LOC1001331 | 0.8104 | 1.0261 | 1.1171 | 0.9020 | 0.9639 | 0.0675 |
| GPR83      | 0.8370 | 1.0867 | 0.9567 | 0.9753 | 0.9639 | 0.0511 |
| LOC1001304 | 0.9114 | 1.0676 | 0.9509 | 0.9258 | 0.9639 | 0.0355 |
| CST4       | 0.8940 | 1.0186 | 1.0371 | 0.9061 | 0.9640 | 0.0372 |
| FLJ20184   | 0.9460 | 1.0973 | 0.9721 | 0.8405 | 0.9640 | 0.0528 |
| LOC642620  | 1.0555 | 0.9404 | 1.0039 | 0.8560 | 0.9640 | 0.0430 |
| LOC646396  | 0.8970 | 1.0616 | 1.0494 | 0.8479 | 0.9640 | 0.0538 |
| YSK4       | 0.8933 | 1.0812 | 0.9548 | 0.9266 | 0.9640 | 0.0410 |
| LOC1001308 | 0.9330 | 0.9822 | 1.0456 | 0.8952 | 0.9640 | 0.0325 |
| SPACA3     | 0.8234 | 0.9864 | 1.0284 | 1.0178 | 0.9640 | 0.0477 |
| LOC645293  | 1.0133 | 1.0436 | 0.9333 | 0.8658 | 0.9640 | 0.0402 |
| TTY13      | 0.9062 | 1.0150 | 0.9569 | 0.9778 | 0.9640 | 0.0227 |
| LOC730704  | 0.8762 | 1.1005 | 1.0795 | 0.7998 | 0.9640 | 0.0745 |
| LOC642633  | 1.0262 | 1.0421 | 0.9850 | 0.8027 | 0.9640 | 0.0551 |
| FAM183B    | 0.9967 | 1.0345 | 0.9729 | 0.8519 | 0.9640 | 0.0395 |
| LOC647723  | 0.9141 | 0.9820 | 1.0100 | 0.9499 | 0.9640 | 0.0207 |
| RPS6KB2    | 0.9022 | 1.2589 | 0.9824 | 0.7126 | 0.9640 | 0.1134 |
| KCNK2      | 0.8749 | 1.0177 | 1.0233 | 0.9402 | 0.9640 | 0.0352 |
| DIO3       | 0.9515 | 1.0740 | 1.0190 | 0.8116 | 0.9640 | 0.0567 |
| MGC26718   | 0.9844 | 1.0280 | 0.9367 | 0.9070 | 0.9640 | 0.0266 |
| MIR624     | 0.8386 | 1.1078 | 1.0230 | 0.8867 | 0.9640 | 0.0618 |
| CGGBP1     | 0.8660 | 1.3016 | 0.9405 | 0.7479 | 0.9640 | 0.1193 |
| MUT        | 0.8800 | 1.3782 | 0.8903 | 0.7075 | 0.9640 | 0.1443 |
| KIAA1276   | 0.8759 | 1.0970 | 1.0034 | 0.8798 | 0.9640 | 0.0533 |
| SNORA50    | 0.8854 | 1.0025 | 1.0222 | 0.9460 | 0.9640 | 0.0308 |
| C2orf66    | 0.8848 | 1.0077 | 1.0461 | 0.9176 | 0.9640 | 0.0377 |
| CHST10     | 1.0051 | 1.1359 | 0.8586 | 0.8564 | 0.9640 | 0.0670 |
| C6orf114   | 0.9049 | 1.1110 | 0.9727 | 0.8675 | 0.9640 | 0.0536 |
| LOC642403  | 0.8710 | 1.0353 | 1.0231 | 0.9268 | 0.9640 | 0.0394 |
| LOC1001335 | 0.8657 | 1.1106 | 1.0346 | 0.8454 | 0.9640 | 0.0647 |
| HSPB7      | 0.8400 | 1.0870 | 1.0573 | 0.8719 | 0.9641 | 0.0630 |
| KRTAP4-4   | 0.9712 | 1.0130 | 0.9824 | 0.8896 | 0.9641 | 0.0263 |
| TRIM15     | 0.9298 | 1.0638 | 0.9512 | 0.9115 | 0.9641 | 0.0342 |
| LOC729310  | 0.8583 | 1.0667 | 1.0187 | 0.9126 | 0.9641 | 0.0477 |
| BICC1      | 0.9382 | 1.0643 | 0.9894 | 0.8644 | 0.9641 | 0.0421 |
| NES        | 0.9201 | 1.0853 | 1.0299 | 0.8211 | 0.9641 | 0.0587 |
| MAGED2     | 0.9070 | 1.1471 | 1.0003 | 0.8018 | 0.9641 | 0.0733 |



|            |        |        |        |        |        |        |
|------------|--------|--------|--------|--------|--------|--------|
| CALU       | 0.8591 | 1.3377 | 1.0010 | 0.6586 | 0.9641 | 0.1430 |
| BTK        | 0.8283 | 1.1598 | 0.9650 | 0.9033 | 0.9641 | 0.0710 |
| FAM41C     | 0.9910 | 0.9634 | 0.9620 | 0.9400 | 0.9641 | 0.0105 |
| C10orf112  | 0.9647 | 1.1167 | 0.9655 | 0.8095 | 0.9641 | 0.0627 |
| PDE4DIP    | 0.9340 | 1.0182 | 0.9870 | 0.9173 | 0.9641 | 0.0234 |
| TMEM190    | 0.8802 | 0.9788 | 1.0459 | 0.9515 | 0.9641 | 0.0343 |
| LOC644482  | 0.9668 | 0.9287 | 1.1655 | 0.7954 | 0.9641 | 0.0765 |
| ARHGAP30   | 0.9077 | 1.0324 | 0.9894 | 0.9270 | 0.9641 | 0.0287 |
| PARP11     | 0.9466 | 1.1115 | 0.9379 | 0.8605 | 0.9641 | 0.0528 |
| LOC642568  | 0.9807 | 1.0661 | 0.9118 | 0.8979 | 0.9641 | 0.0385 |
| ARID1B     | 0.8840 | 1.0211 | 1.0527 | 0.8987 | 0.9641 | 0.0426 |
| TMEM102    | 0.9424 | 1.0896 | 0.9377 | 0.8867 | 0.9641 | 0.0437 |
| RAB10      | 0.8250 | 1.2707 | 0.9941 | 0.7666 | 0.9641 | 0.1130 |
| LOC643981  | 0.8979 | 1.0537 | 0.9425 | 0.9624 | 0.9641 | 0.0328 |
| GPR110     | 0.9214 | 1.0709 | 0.9798 | 0.8844 | 0.9641 | 0.0407 |
| LOC440320  | 0.9178 | 1.0295 | 1.0164 | 0.8929 | 0.9641 | 0.0344 |
| LOC1001295 | 0.8910 | 1.0747 | 1.0651 | 0.8258 | 0.9641 | 0.0625 |
| A3GALT2    | 0.9550 | 1.0527 | 0.9566 | 0.8923 | 0.9642 | 0.0331 |
| ALKBH5     | 0.8654 | 1.2638 | 1.0071 | 0.7203 | 0.9642 | 0.1158 |
| LOC730382  | 0.9205 | 0.9691 | 1.1787 | 0.7884 | 0.9642 | 0.0811 |
| SNORA54    | 0.8392 | 1.0387 | 1.0742 | 0.9046 | 0.9642 | 0.0554 |
| LOC400347  | 0.9443 | 1.1033 | 0.9294 | 0.8796 | 0.9642 | 0.0484 |
| SNORD55    | 0.8047 | 1.2174 | 1.0770 | 0.7575 | 0.9642 | 0.1099 |
| MIR222     | 0.9251 | 1.0009 | 0.9892 | 0.9415 | 0.9642 | 0.0183 |
| MMP8       | 0.8667 | 1.0474 | 1.0308 | 0.9118 | 0.9642 | 0.0443 |
| MIR373     | 1.0487 | 0.9737 | 1.0556 | 0.7787 | 0.9642 | 0.0646 |
| LOC644391  | 0.9456 | 0.9611 | 1.0548 | 0.8953 | 0.9642 | 0.0333 |
| PIWIL1     | 0.9752 | 1.0385 | 0.9326 | 0.9104 | 0.9642 | 0.0282 |
| EFCAB6     | 0.9009 | 1.0475 | 1.0029 | 0.9054 | 0.9642 | 0.0364 |
| ZNF498     | 0.9398 | 1.0730 | 0.9412 | 0.9028 | 0.9642 | 0.0373 |
| LOC652290  | 0.9344 | 1.1181 | 1.0046 | 0.7996 | 0.9642 | 0.0666 |
| LOC1001335 | 0.9328 | 0.9789 | 1.0101 | 0.9350 | 0.9642 | 0.0186 |
| LOC1001296 | 0.9733 | 1.0562 | 0.8871 | 0.9402 | 0.9642 | 0.0354 |
| LOC652191  | 0.9197 | 1.0407 | 1.0062 | 0.8903 | 0.9642 | 0.0354 |
| LOC642580  | 0.9208 | 1.1496 | 0.9645 | 0.8218 | 0.9642 | 0.0686 |
| SCRN1      | 0.8921 | 1.0500 | 0.9342 | 0.9806 | 0.9642 | 0.0338 |
| LOC1001308 | 1.0444 | 1.0572 | 0.9470 | 0.8084 | 0.9642 | 0.0575 |
| LCE3B      | 0.9707 | 0.9258 | 1.0282 | 0.9322 | 0.9642 | 0.0235 |
| LOC729371  | 0.9240 | 1.1197 | 0.9584 | 0.8549 | 0.9642 | 0.0561 |
| MIR577     | 0.8202 | 1.1694 | 1.0584 | 0.8090 | 0.9642 | 0.0893 |
| DUSP6      | 0.8317 | 1.0519 | 1.0788 | 0.8945 | 0.9642 | 0.0600 |
| LOC642974  | 0.9568 | 1.0905 | 0.9619 | 0.8477 | 0.9642 | 0.0496 |
| GRM7       | 0.9335 | 0.9921 | 1.0292 | 0.9022 | 0.9642 | 0.0286 |
| LOC1001338 | 0.8670 | 1.1615 | 1.0157 | 0.8128 | 0.9642 | 0.0785 |
| LOC645416  | 0.8937 | 1.0990 | 1.0697 | 0.7945 | 0.9642 | 0.0725 |
| FAM7A2     | 0.9531 | 1.0295 | 0.9879 | 0.8866 | 0.9642 | 0.0302 |

|            |        |        |        |        |        |        |
|------------|--------|--------|--------|--------|--------|--------|
| LOC1001331 | 1.0123 | 1.0356 | 1.0407 | 0.7683 | 0.9642 | 0.0656 |
| IL18BP     | 0.9004 | 1.0744 | 1.0004 | 0.8817 | 0.9642 | 0.0450 |
| LOC645914  | 0.9992 | 0.8710 | 1.1223 | 0.8645 | 0.9643 | 0.0611 |
| LOC644705  | 0.9704 | 1.0882 | 0.9723 | 0.8261 | 0.9643 | 0.0536 |
| CASS4      | 0.8490 | 1.1424 | 0.9764 | 0.8893 | 0.9643 | 0.0651 |
| ELP2P      | 1.0672 | 1.0000 | 0.9608 | 0.8291 | 0.9643 | 0.0501 |
| CIZ1       | 0.9214 | 1.0519 | 0.9661 | 0.9177 | 0.9643 | 0.0312 |
| MIR548A3   | 0.9597 | 1.0728 | 0.9810 | 0.8436 | 0.9643 | 0.0471 |
| LOC729370  | 0.9213 | 1.1225 | 0.9476 | 0.8657 | 0.9643 | 0.0554 |
| TPPP2      | 0.9367 | 1.0035 | 0.9601 | 0.9567 | 0.9643 | 0.0141 |
| LOC1001293 | 0.8618 | 1.0772 | 1.0007 | 0.9174 | 0.9643 | 0.0472 |
| VPS53      | 0.8853 | 1.0864 | 1.0145 | 0.8709 | 0.9643 | 0.0520 |
| CCL28      | 0.8709 | 1.0936 | 1.0079 | 0.8847 | 0.9643 | 0.0530 |
| YJEFN3     | 0.9608 | 1.0321 | 0.9846 | 0.8797 | 0.9643 | 0.0319 |
| LOC440786  | 0.7506 | 1.1593 | 1.0070 | 0.9403 | 0.9643 | 0.0847 |
| LOC400986  | 0.9629 | 1.0219 | 0.9981 | 0.8744 | 0.9643 | 0.0323 |
| CLCA2      | 0.8143 | 1.0425 | 1.0680 | 0.9325 | 0.9643 | 0.0580 |
| MIR548E    | 1.0023 | 1.0308 | 1.0217 | 0.8025 | 0.9643 | 0.0543 |
| AICDA      | 0.9432 | 1.0841 | 0.9413 | 0.8887 | 0.9643 | 0.0419 |
| LOC1001307 | 0.9628 | 1.0652 | 0.9811 | 0.8482 | 0.9643 | 0.0447 |
| THAP9      | 0.9108 | 0.9649 | 1.0881 | 0.8935 | 0.9643 | 0.0440 |
| HIST1H4I   | 0.9909 | 1.1401 | 1.0391 | 0.6873 | 0.9643 | 0.0974 |
| LOC1001339 | 0.9320 | 1.0385 | 0.9705 | 0.9163 | 0.9643 | 0.0272 |
| CATSPER3   | 0.8813 | 1.1557 | 0.9159 | 0.9045 | 0.9643 | 0.0642 |
| MIR1280    | 0.8629 | 1.0509 | 0.9950 | 0.9486 | 0.9644 | 0.0398 |
| NKX6-2     | 0.8416 | 1.0673 | 1.0411 | 0.9075 | 0.9644 | 0.0538 |
| LOC1001292 | 0.9042 | 0.9649 | 1.1294 | 0.8589 | 0.9644 | 0.0591 |
| FMN2       | 0.9602 | 1.0210 | 1.0251 | 0.8512 | 0.9644 | 0.0405 |
| LOC728395  | 0.8890 | 1.1024 | 1.0348 | 0.8312 | 0.9644 | 0.0629 |
| LOC652260  | 0.9434 | 1.0968 | 0.9159 | 0.9014 | 0.9644 | 0.0450 |
| APOA4      | 0.9233 | 1.0899 | 0.9577 | 0.8867 | 0.9644 | 0.0443 |
| OR2A5      | 0.8454 | 1.0472 | 1.0417 | 0.9232 | 0.9644 | 0.0489 |
| LOC1001347 | 0.9888 | 1.0033 | 0.9958 | 0.8695 | 0.9644 | 0.0317 |
| LOC727789  | 0.8608 | 1.0583 | 0.9820 | 0.9565 | 0.9644 | 0.0407 |
| LOC644291  | 0.9208 | 1.0214 | 1.0286 | 0.8867 | 0.9644 | 0.0357 |
| TAS2R5     | 0.9130 | 1.0408 | 0.9945 | 0.9093 | 0.9644 | 0.0322 |
| ZNF79      | 0.8360 | 1.1369 | 1.1201 | 0.7645 | 0.9644 | 0.0959 |
| ZNF662     | 0.9780 | 1.0921 | 0.8938 | 0.8936 | 0.9644 | 0.0470 |
| LOC1001300 | 0.9973 | 1.0684 | 0.9651 | 0.8268 | 0.9644 | 0.0507 |
| LOC729004  | 0.8507 | 1.0763 | 1.0792 | 0.8513 | 0.9644 | 0.0655 |
| PCDHGA8    | 0.9719 | 0.9220 | 1.1126 | 0.8512 | 0.9644 | 0.0552 |
| IL1F8      | 0.9354 | 1.0799 | 0.9800 | 0.8623 | 0.9644 | 0.0455 |
| CCDC102B   | 0.9980 | 1.1090 | 0.9506 | 0.8000 | 0.9644 | 0.0641 |
| LOC642804  | 0.7924 | 1.1518 | 0.9701 | 0.9434 | 0.9644 | 0.0737 |
| FLJ37453   | 0.9203 | 1.0185 | 1.0165 | 0.9022 | 0.9644 | 0.0309 |
| MUC7       | 0.9111 | 1.0941 | 0.9486 | 0.9038 | 0.9644 | 0.0443 |

|            |        |        |        |        |        |        |
|------------|--------|--------|--------|--------|--------|--------|
| LOC1001331 | 0.8994 | 0.9672 | 0.9683 | 1.0228 | 0.9644 | 0.0253 |
| LOC285444  | 0.8751 | 1.0981 | 0.9341 | 0.9504 | 0.9644 | 0.0474 |
| LOC392288  | 0.9635 | 1.0347 | 0.9720 | 0.8874 | 0.9644 | 0.0302 |
| LOC127150  | 0.8686 | 1.1371 | 1.0578 | 0.7943 | 0.9644 | 0.0799 |
| LOC440992  | 0.9066 | 1.1444 | 0.9305 | 0.8763 | 0.9644 | 0.0610 |
| LOC649765  | 0.9378 | 1.1383 | 0.8390 | 0.9427 | 0.9644 | 0.0627 |
| LOC651029  | 0.9133 | 1.1443 | 0.9696 | 0.8306 | 0.9644 | 0.0664 |
| ANKRD36B   | 0.9229 | 1.1815 | 0.9182 | 0.8352 | 0.9645 | 0.0751 |
| LOC652252  | 0.9469 | 1.0186 | 1.0652 | 0.8271 | 0.9645 | 0.0518 |
| ZNF8       | 0.9656 | 1.0049 | 0.9663 | 0.9210 | 0.9645 | 0.0171 |
| ZNF438     | 0.9757 | 1.1275 | 0.9328 | 0.8219 | 0.9645 | 0.0633 |
| SNORD93    | 0.9287 | 1.0232 | 1.0668 | 0.8391 | 0.9645 | 0.0508 |
| F10        | 0.9150 | 1.0683 | 0.9436 | 0.9310 | 0.9645 | 0.0351 |
| LOC649738  | 0.9025 | 1.0356 | 0.9406 | 0.9792 | 0.9645 | 0.0284 |
| CT45A1     | 0.9334 | 1.0728 | 0.9408 | 0.9109 | 0.9645 | 0.0367 |
| KLRG2      | 0.9405 | 0.9685 | 1.0729 | 0.8760 | 0.9645 | 0.0410 |
| EIF4E2     | 0.7485 | 1.4688 | 0.9323 | 0.7083 | 0.9645 | 0.1750 |
| LOC643356  | 0.9665 | 1.0697 | 0.9226 | 0.8991 | 0.9645 | 0.0377 |
| PACS2      | 0.9605 | 1.1449 | 0.9135 | 0.8391 | 0.9645 | 0.0651 |
| AUTS2      | 1.0677 | 0.9509 | 1.1206 | 0.7188 | 0.9645 | 0.0892 |
| FAM39DP    | 0.8880 | 1.2759 | 0.9199 | 0.7742 | 0.9645 | 0.1084 |
| LOC1001331 | 0.7971 | 1.0448 | 1.0483 | 0.9679 | 0.9645 | 0.0588 |
| ZNF778     | 0.9293 | 1.0546 | 1.0206 | 0.8536 | 0.9645 | 0.0455 |
| IL11       | 1.0373 | 1.0764 | 0.9144 | 0.8300 | 0.9645 | 0.0566 |
| LOC649200  | 0.9170 | 1.0209 | 0.9482 | 0.9720 | 0.9645 | 0.0219 |
| KRT79      | 0.9122 | 1.0919 | 1.0225 | 0.8315 | 0.9645 | 0.0577 |
| LOC729154  | 0.8620 | 1.0510 | 0.9454 | 0.9997 | 0.9645 | 0.0404 |
| LOC1001288 | 0.9537 | 1.0635 | 0.9903 | 0.8507 | 0.9645 | 0.0443 |
| SEC11B     | 0.9714 | 1.0182 | 0.9368 | 0.9317 | 0.9645 | 0.0199 |
| AP3S1      | 0.8312 | 1.3745 | 0.9118 | 0.7407 | 0.9646 | 0.1410 |
| FLJ46300   | 0.8454 | 1.0629 | 1.0193 | 0.9307 | 0.9646 | 0.0483 |
| LOC648222  | 0.9871 | 1.0297 | 0.9528 | 0.8886 | 0.9646 | 0.0298 |
| MBD5       | 0.9082 | 1.1407 | 0.9472 | 0.8621 | 0.9646 | 0.0612 |
| LOC1001286 | 0.8684 | 1.0996 | 1.0004 | 0.8897 | 0.9646 | 0.0535 |
| LOC728401  | 0.9346 | 0.9859 | 1.0223 | 0.9155 | 0.9646 | 0.0243 |
| C6orf148   | 0.7826 | 1.4040 | 0.8948 | 0.7769 | 0.9646 | 0.1490 |
| PZP        | 0.9455 | 1.0807 | 0.9122 | 0.9198 | 0.9646 | 0.0394 |
| GRM1       | 0.9208 | 1.0022 | 1.0482 | 0.8871 | 0.9646 | 0.0369 |
| MMP13      | 0.8884 | 1.1119 | 1.0218 | 0.8362 | 0.9646 | 0.0627 |
| NHEJ1      | 0.9053 | 1.0019 | 0.9832 | 0.9679 | 0.9646 | 0.0210 |
| PDK4       | 0.9746 | 1.0579 | 0.9373 | 0.8885 | 0.9646 | 0.0357 |
| FARSB      | 0.8573 | 1.0579 | 1.0508 | 0.8924 | 0.9646 | 0.0523 |
| LOC731797  | 0.8739 | 1.0341 | 1.0229 | 0.9275 | 0.9646 | 0.0386 |
| LAYN       | 0.8955 | 1.1253 | 0.9003 | 0.9374 | 0.9646 | 0.0544 |
| C1orf194   | 0.9439 | 1.0000 | 1.0170 | 0.8975 | 0.9646 | 0.0273 |
| LOC729915  | 0.8614 | 1.0183 | 0.9964 | 0.9823 | 0.9646 | 0.0352 |

|            |        |        |        |        |        |        |
|------------|--------|--------|--------|--------|--------|--------|
| PRDM15     | 0.9312 | 0.9838 | 0.9419 | 1.0014 | 0.9646 | 0.0167 |
| LOC728473  | 0.9731 | 1.0804 | 0.8930 | 0.9119 | 0.9646 | 0.0422 |
| SNX32      | 0.7646 | 1.0311 | 1.0586 | 1.0042 | 0.9646 | 0.0676 |
| SEMA6B     | 0.9355 | 0.9419 | 1.0616 | 0.9194 | 0.9646 | 0.0327 |
| MIR138-1   | 0.9077 | 1.0522 | 0.9332 | 0.9654 | 0.9646 | 0.0315 |
| LOC650887  | 1.0832 | 1.0260 | 0.9400 | 0.8093 | 0.9646 | 0.0595 |
| USP4       | 0.8903 | 1.1592 | 1.0000 | 0.8091 | 0.9646 | 0.0757 |
| LOC652156  | 0.9251 | 1.0300 | 0.9774 | 0.9259 | 0.9646 | 0.0250 |
| LOC642981  | 0.8405 | 1.0942 | 1.0287 | 0.8951 | 0.9646 | 0.0585 |
| FBLN1      | 0.8838 | 1.0965 | 0.9658 | 0.9125 | 0.9646 | 0.0471 |
| USP50      | 0.8694 | 1.0241 | 1.0314 | 0.9338 | 0.9647 | 0.0388 |
| TRIM60     | 0.9164 | 0.9939 | 1.0139 | 0.9344 | 0.9647 | 0.0233 |
| LOC644143  | 0.8869 | 1.0168 | 1.0232 | 0.9318 | 0.9647 | 0.0333 |
| SPP2       | 0.9208 | 1.0788 | 0.9895 | 0.8696 | 0.9647 | 0.0453 |
| C14orf70   | 0.8676 | 1.0315 | 1.0899 | 0.8698 | 0.9647 | 0.0567 |
| LOC647262  | 0.9548 | 0.9718 | 0.9968 | 0.9353 | 0.9647 | 0.0130 |
| C14orf139  | 0.9701 | 0.9911 | 0.9963 | 0.9012 | 0.9647 | 0.0219 |
| LOC642583  | 0.9582 | 1.0606 | 1.0008 | 0.8391 | 0.9647 | 0.0468 |
| TAS2R4     | 0.9129 | 0.9864 | 1.0280 | 0.9316 | 0.9647 | 0.0262 |
| C10orf92   | 0.9284 | 1.0873 | 0.9834 | 0.8597 | 0.9647 | 0.0481 |
| LOC642361  | 0.8782 | 1.2375 | 0.9330 | 0.8101 | 0.9647 | 0.0944 |
| DAB2IP     | 0.8629 | 1.1244 | 1.0014 | 0.8701 | 0.9647 | 0.0620 |
| LOC728912  | 0.9328 | 0.9866 | 1.0219 | 0.9177 | 0.9647 | 0.0241 |
| LOC643749  | 1.0525 | 0.8794 | 0.9603 | 0.9668 | 0.9647 | 0.0354 |
| FBXL14     | 0.8644 | 1.1031 | 1.0269 | 0.8645 | 0.9647 | 0.0600 |
| LOC647224  | 1.0051 | 1.0930 | 0.9189 | 0.8418 | 0.9647 | 0.0542 |
| LOC1001289 | 0.8586 | 1.1023 | 1.0368 | 0.8613 | 0.9647 | 0.0620 |
| LOC644814  | 0.9131 | 1.0740 | 0.9476 | 0.9242 | 0.9647 | 0.0371 |
| FAM55D     | 0.9170 | 1.0558 | 0.9813 | 0.9049 | 0.9647 | 0.0347 |
| LOC644957  | 0.9210 | 1.0660 | 1.0346 | 0.8374 | 0.9647 | 0.0526 |
| FOXP3      | 0.9495 | 1.0067 | 1.0517 | 0.8511 | 0.9648 | 0.0433 |
| FAM26D     | 0.9873 | 0.8372 | 1.0523 | 0.9822 | 0.9648 | 0.0454 |
| LOC391655  | 0.9606 | 1.0058 | 1.0791 | 0.8135 | 0.9648 | 0.0560 |
| TMC7       | 0.9859 | 1.0178 | 0.9936 | 0.8617 | 0.9648 | 0.0350 |
| LOC1001343 | 0.9117 | 1.0664 | 1.0212 | 0.8597 | 0.9648 | 0.0478 |
| LOC1001326 | 0.8530 | 1.0630 | 1.0376 | 0.9055 | 0.9648 | 0.0508 |
| PTPRV      | 0.8859 | 0.9710 | 1.0085 | 0.9936 | 0.9648 | 0.0274 |
| CARD9      | 0.9461 | 1.0776 | 0.9472 | 0.8883 | 0.9648 | 0.0400 |
| STK31      | 0.9387 | 1.0477 | 1.0133 | 0.8595 | 0.9648 | 0.0418 |
| TTN        | 0.8784 | 1.0409 | 1.0044 | 0.9355 | 0.9648 | 0.0361 |
| ATP11A     | 0.9730 | 1.0212 | 0.9669 | 0.8980 | 0.9648 | 0.0254 |
| MGC40168   | 0.9247 | 1.0439 | 0.9305 | 0.9601 | 0.9648 | 0.0275 |
| LOC283874  | 0.8861 | 1.0333 | 1.0095 | 0.9303 | 0.9648 | 0.0342 |
| LOC1001331 | 0.9158 | 1.0086 | 0.8695 | 1.0652 | 0.9648 | 0.0442 |
| DAND5      | 0.8510 | 1.0147 | 0.9364 | 1.0571 | 0.9648 | 0.0454 |
| LOC1001296 | 0.8903 | 1.0484 | 1.0390 | 0.8816 | 0.9648 | 0.0456 |

|            |        |        |        |        |        |        |
|------------|--------|--------|--------|--------|--------|--------|
| DNASE1L1   | 0.8753 | 1.1286 | 1.0382 | 0.8172 | 0.9648 | 0.0719 |
| C20orf152  | 0.9444 | 1.0904 | 0.9861 | 0.8385 | 0.9648 | 0.0521 |
| LOC651017  | 0.9998 | 1.0099 | 1.0304 | 0.8192 | 0.9648 | 0.0490 |
| LOC642780  | 0.9350 | 1.0615 | 0.9771 | 0.8857 | 0.9648 | 0.0372 |
| LOC283683  | 0.8493 | 1.0562 | 1.0766 | 0.8772 | 0.9648 | 0.0591 |
| LOC728615  | 0.8696 | 1.0568 | 1.0100 | 0.9229 | 0.9648 | 0.0422 |
| ACRC       | 0.9562 | 0.9976 | 1.1172 | 0.7883 | 0.9648 | 0.0680 |
| APOL1      | 0.8608 | 1.0254 | 1.0291 | 0.9441 | 0.9649 | 0.0398 |
| LOC1001343 | 0.7219 | 0.8780 | 1.1819 | 1.0776 | 0.9649 | 0.1026 |
| ACADL      | 0.9025 | 1.0627 | 0.9684 | 0.9258 | 0.9649 | 0.0353 |
| MGC15705   | 0.9086 | 1.0103 | 1.0895 | 0.8511 | 0.9649 | 0.0530 |
| SEC22B     | 0.8412 | 1.3468 | 0.8855 | 0.7860 | 0.9649 | 0.1289 |
| LTBP1      | 0.9295 | 0.9587 | 1.0395 | 0.9318 | 0.9649 | 0.0258 |
| GCET2      | 0.8877 | 1.1533 | 0.9759 | 0.8426 | 0.9649 | 0.0686 |
| LOC647582  | 0.9672 | 1.0258 | 1.0324 | 0.8341 | 0.9649 | 0.0460 |
| MMP14      | 0.8764 | 0.9672 | 1.0202 | 0.9957 | 0.9649 | 0.0314 |
| LOC389156  | 0.5282 | 1.2391 | 1.4203 | 0.6718 | 0.9649 | 0.2159 |
| LOC1001314 | 0.9343 | 1.0800 | 0.9935 | 0.8518 | 0.9649 | 0.0481 |
| LOC731002  | 0.9210 | 1.0417 | 0.9879 | 0.9089 | 0.9649 | 0.0309 |
| RTP1       | 0.9309 | 1.1159 | 0.9096 | 0.9032 | 0.9649 | 0.0507 |
| APOBEC1    | 0.8705 | 1.0579 | 0.9853 | 0.9458 | 0.9649 | 0.0391 |
| PCDHA9     | 0.8750 | 1.0822 | 1.0009 | 0.9015 | 0.9649 | 0.0476 |
| NPHS2      | 0.9777 | 1.0992 | 0.9702 | 0.8125 | 0.9649 | 0.0588 |
| AMY2B      | 0.9609 | 1.0572 | 0.9595 | 0.8821 | 0.9649 | 0.0358 |
| FAM48B1    | 0.9288 | 1.0726 | 0.9713 | 0.8870 | 0.9649 | 0.0398 |
| RGS7BP     | 0.8803 | 0.9781 | 1.0476 | 0.9536 | 0.9649 | 0.0345 |
| LOC728393  | 0.8609 | 1.0497 | 1.0236 | 0.9254 | 0.9649 | 0.0438 |
| SLC16A13   | 0.8802 | 1.1685 | 0.9753 | 0.8357 | 0.9649 | 0.0738 |
| LOC652200  | 0.9650 | 0.9971 | 1.0192 | 0.8783 | 0.9649 | 0.0309 |
| LOC644739  | 0.9526 | 1.1411 | 0.9610 | 0.8050 | 0.9649 | 0.0688 |
| LOC728150  | 0.9637 | 0.9633 | 1.0401 | 0.8926 | 0.9649 | 0.0301 |
| SEC11A     | 0.7757 | 1.3787 | 0.9218 | 0.7835 | 0.9649 | 0.1419 |
| LYZL6      | 0.9560 | 1.1860 | 0.8401 | 0.8777 | 0.9649 | 0.0775 |
| C1orf146   | 0.9792 | 1.0521 | 0.9930 | 0.8354 | 0.9649 | 0.0460 |
| RAET1G     | 0.9383 | 1.0613 | 1.0104 | 0.8498 | 0.9650 | 0.0459 |
| ENKUR      | 0.9497 | 0.9606 | 1.0516 | 0.8979 | 0.9650 | 0.0320 |
| PM20D1     | 1.0355 | 1.0844 | 0.9076 | 0.8324 | 0.9650 | 0.0578 |
| C12orf29   | 0.8055 | 1.1530 | 1.1842 | 0.7172 | 0.9650 | 0.1191 |
| LOC440900  | 0.8987 | 1.0333 | 1.1078 | 0.8201 | 0.9650 | 0.0648 |
| LOC1001328 | 0.8799 | 1.0648 | 0.9581 | 0.9570 | 0.9650 | 0.0380 |
| PAGE2      | 0.9832 | 1.0345 | 0.9535 | 0.8887 | 0.9650 | 0.0304 |
| DMD        | 0.9174 | 1.0941 | 0.9692 | 0.8792 | 0.9650 | 0.0468 |
| RYR1       | 0.8725 | 1.0250 | 1.0410 | 0.9214 | 0.9650 | 0.0406 |
| KCNH8      | 0.8498 | 1.1409 | 1.0262 | 0.8430 | 0.9650 | 0.0724 |
| MIR122     | 0.8471 | 1.0909 | 1.0200 | 0.9019 | 0.9650 | 0.0553 |
| LOC653924  | 0.8619 | 1.0555 | 0.9378 | 1.0047 | 0.9650 | 0.0420 |

|            |        |        |        |        |        |        |
|------------|--------|--------|--------|--------|--------|--------|
| MIR1324    | 0.9557 | 1.0833 | 0.9208 | 0.9002 | 0.9650 | 0.0411 |
| LOC1001287 | 0.8967 | 1.0328 | 1.1073 | 0.8232 | 0.9650 | 0.0643 |
| ILDR1      | 0.9730 | 1.0663 | 0.9526 | 0.8681 | 0.9650 | 0.0407 |
| LOC1001309 | 0.8452 | 1.0428 | 1.0627 | 0.9092 | 0.9650 | 0.0525 |
| LOC642692  | 0.9219 | 1.1799 | 0.8939 | 0.8643 | 0.9650 | 0.0726 |
| LOC652492  | 0.8752 | 1.0725 | 1.0528 | 0.8595 | 0.9650 | 0.0566 |
| SLC26A5    | 0.8710 | 1.0999 | 0.9891 | 0.9001 | 0.9650 | 0.0515 |
| GFOD1      | 0.7654 | 1.4345 | 0.9187 | 0.7414 | 0.9650 | 0.1614 |
| MIR635     | 1.0150 | 1.1135 | 0.7336 | 0.9980 | 0.9650 | 0.0812 |
| LOC642188  | 0.8778 | 0.9678 | 1.0894 | 0.9250 | 0.9650 | 0.0454 |
| C20orf96   | 0.9058 | 1.0968 | 0.8816 | 0.9758 | 0.9650 | 0.0483 |
| SNRNP35    | 0.9154 | 1.1628 | 0.9548 | 0.8271 | 0.9650 | 0.0711 |
| BMP2K      | 0.9300 | 1.0124 | 1.0341 | 0.8836 | 0.9650 | 0.0352 |
| MIR939     | 0.9075 | 1.0305 | 1.0267 | 0.8954 | 0.9650 | 0.0368 |
| LOC728217  | 0.9384 | 1.0193 | 0.9815 | 0.9209 | 0.9650 | 0.0221 |
| LOC375295  | 0.9653 | 1.0327 | 0.9683 | 0.8937 | 0.9650 | 0.0284 |
| OR4D9      | 0.9044 | 1.0085 | 1.0687 | 0.8785 | 0.9650 | 0.0445 |
| LOC648089  | 0.8886 | 1.0689 | 0.9987 | 0.9040 | 0.9651 | 0.0423 |
| PTCHD3     | 0.9266 | 1.0837 | 0.9898 | 0.8601 | 0.9651 | 0.0476 |
| CDRT15L2   | 0.8710 | 1.1723 | 0.9527 | 0.8642 | 0.9651 | 0.0720 |
| SCN2B      | 1.0413 | 1.0192 | 0.9427 | 0.8570 | 0.9651 | 0.0418 |
| FLJ16369   | 0.8683 | 1.0394 | 1.1103 | 0.8423 | 0.9651 | 0.0652 |
| KIAA1383   | 0.9303 | 1.0976 | 0.9813 | 0.8511 | 0.9651 | 0.0517 |
| LOC642468  | 0.9035 | 1.1134 | 1.0110 | 0.8324 | 0.9651 | 0.0616 |
| TGM7       | 0.8946 | 0.9604 | 1.0825 | 0.9228 | 0.9651 | 0.0414 |
| LOC729590  | 0.9100 | 0.9905 | 0.9893 | 0.9705 | 0.9651 | 0.0189 |
| GTF2IRD2   | 0.9998 | 1.0333 | 0.9189 | 0.9085 | 0.9651 | 0.0305 |
| LOC728624  | 0.9394 | 1.0096 | 0.9863 | 0.9250 | 0.9651 | 0.0198 |
| SNORD127   | 0.8665 | 1.0187 | 0.9814 | 0.9938 | 0.9651 | 0.0338 |
| DEFB104A   | 0.8363 | 1.1089 | 0.9876 | 0.9276 | 0.9651 | 0.0571 |
| LOC1001286 | 0.8810 | 1.0344 | 1.0374 | 0.9076 | 0.9651 | 0.0412 |
| LOC653689  | 0.9748 | 1.0551 | 1.0083 | 0.8223 | 0.9651 | 0.0504 |
| LOC644011  | 0.8603 | 1.1489 | 0.9886 | 0.8627 | 0.9651 | 0.0682 |
| ACCS       | 0.8502 | 1.0288 | 1.0678 | 0.9137 | 0.9651 | 0.0504 |
| LOC727863  | 0.9448 | 1.0428 | 0.9571 | 0.9158 | 0.9651 | 0.0273 |
| CBLC       | 0.9617 | 1.0906 | 0.9487 | 0.8594 | 0.9651 | 0.0476 |
| VCAM1      | 0.9399 | 1.0848 | 0.9197 | 0.9161 | 0.9651 | 0.0402 |
| S100A5     | 0.8799 | 1.1345 | 0.9294 | 0.9167 | 0.9651 | 0.0574 |
| SNHG11     | 0.7656 | 1.1646 | 1.0603 | 0.8699 | 0.9651 | 0.0903 |
| MPG        | 0.9225 | 1.0715 | 0.9725 | 0.8940 | 0.9651 | 0.0390 |
| FLJ21986   | 0.9048 | 1.0738 | 1.0184 | 0.8634 | 0.9651 | 0.0488 |
| TRIM29     | 0.9391 | 1.0282 | 1.0250 | 0.8682 | 0.9651 | 0.0383 |
| LOC651530  | 0.9111 | 1.1118 | 0.9403 | 0.8974 | 0.9651 | 0.0497 |
| RNF31      | 0.8524 | 1.3321 | 0.9847 | 0.6914 | 0.9651 | 0.1362 |
| PRPF18     | 0.8601 | 1.0537 | 1.1497 | 0.7970 | 0.9651 | 0.0823 |
| C17orf73   | 0.8713 | 1.2244 | 0.9396 | 0.8253 | 0.9651 | 0.0895 |

|            |        |        |        |        |        |        |
|------------|--------|--------|--------|--------|--------|--------|
| C14orf183  | 0.8916 | 1.1160 | 0.9700 | 0.8829 | 0.9651 | 0.0540 |
| HBZ        | 0.9501 | 1.1151 | 0.9680 | 0.8274 | 0.9652 | 0.0589 |
| LOC1001336 | 0.9672 | 1.0520 | 0.9426 | 0.8988 | 0.9652 | 0.0322 |
| ERCC-00024 | 0.8750 | 0.9947 | 1.0383 | 0.9526 | 0.9652 | 0.0348 |
| LOC1001284 | 0.9528 | 0.9944 | 0.9584 | 0.9550 | 0.9652 | 0.0098 |
| SSR3       | 0.7857 | 1.3015 | 0.9453 | 0.8281 | 0.9652 | 0.1171 |
| LOC729467  | 0.9858 | 1.0299 | 1.0040 | 0.8410 | 0.9652 | 0.0424 |
| LOC649030  | 0.9475 | 1.0081 | 1.0209 | 0.8842 | 0.9652 | 0.0314 |
| RPS26L     | 0.8509 | 1.1922 | 1.1221 | 0.6954 | 0.9652 | 0.1162 |
| STK17A     | 0.8542 | 1.1036 | 1.1048 | 0.7980 | 0.9652 | 0.0811 |
| GPX7       | 0.9677 | 1.0336 | 0.9607 | 0.8988 | 0.9652 | 0.0276 |
| OR2Y1      | 0.9510 | 1.0099 | 0.9754 | 0.9245 | 0.9652 | 0.0182 |
| UBXD7      | 0.9083 | 1.1423 | 0.9173 | 0.8929 | 0.9652 | 0.0592 |
| LOC652597  | 1.0093 | 1.0811 | 0.9335 | 0.8368 | 0.9652 | 0.0523 |
| SNX17      | 0.7332 | 1.4522 | 0.8949 | 0.7805 | 0.9652 | 0.1659 |
| UBTFL5     | 0.9370 | 0.9695 | 1.1256 | 0.8287 | 0.9652 | 0.0614 |
| OR2W3      | 0.7800 | 1.1214 | 1.0576 | 0.9017 | 0.9652 | 0.0771 |
| ZNF468     | 0.8725 | 1.0415 | 1.0718 | 0.8750 | 0.9652 | 0.0532 |
| ZNF43      | 0.9022 | 1.0966 | 0.9644 | 0.8977 | 0.9652 | 0.0464 |
| CPNE7      | 0.8910 | 1.0245 | 1.0411 | 0.9043 | 0.9652 | 0.0392 |
| CUL9       | 0.9225 | 1.1198 | 1.0102 | 0.8084 | 0.9652 | 0.0660 |
| RAB6C      | 0.9530 | 1.0933 | 0.9010 | 0.9135 | 0.9652 | 0.0441 |
| CCDC108    | 0.9241 | 1.0753 | 0.9790 | 0.8824 | 0.9652 | 0.0417 |
| LOC441416  | 0.8429 | 1.0807 | 1.0735 | 0.8638 | 0.9652 | 0.0647 |
| FBXO27     | 0.9633 | 1.0079 | 0.9824 | 0.9072 | 0.9652 | 0.0214 |
| LOC1001293 | 0.9489 | 1.0067 | 1.0051 | 0.9002 | 0.9652 | 0.0255 |
| LOC730385  | 0.9623 | 0.9628 | 0.9749 | 0.9609 | 0.9652 | 0.0033 |
| LOC389118  | 0.9281 | 1.0293 | 0.9544 | 0.9492 | 0.9652 | 0.0221 |
| LOC642996  | 0.9456 | 1.0073 | 1.0041 | 0.9039 | 0.9652 | 0.0249 |
| LECT2      | 0.9302 | 0.9948 | 0.9796 | 0.9563 | 0.9652 | 0.0141 |
| USP2       | 0.8838 | 1.1953 | 0.9573 | 0.8245 | 0.9652 | 0.0814 |
| LOC732443  | 0.8599 | 1.1207 | 1.0931 | 0.7874 | 0.9652 | 0.0833 |
| ITGB8      | 0.9312 | 1.0494 | 0.9740 | 0.9064 | 0.9653 | 0.0313 |
| NLRP7      | 0.9254 | 1.0617 | 1.0388 | 0.8352 | 0.9653 | 0.0526 |
| NKAIN3     | 1.0031 | 1.1229 | 0.9094 | 0.8255 | 0.9653 | 0.0639 |
| KCNMB2     | 0.8834 | 1.0287 | 1.0373 | 0.9117 | 0.9653 | 0.0396 |
| LOC441773  | 0.8463 | 1.0865 | 1.0424 | 0.8858 | 0.9653 | 0.0585 |
| C11orf70   | 0.9384 | 1.0816 | 0.9696 | 0.8716 | 0.9653 | 0.0438 |
| LOC643884  | 0.9723 | 1.0872 | 0.9670 | 0.8347 | 0.9653 | 0.0516 |
| LOC729218  | 0.9717 | 1.0505 | 1.0153 | 0.8237 | 0.9653 | 0.0499 |
| LOC645951  | 0.9127 | 1.1926 | 0.9341 | 0.8217 | 0.9653 | 0.0796 |
| LOC401433  | 0.9568 | 1.0602 | 0.9848 | 0.8593 | 0.9653 | 0.0415 |
| FAM127B    | 0.8702 | 1.3010 | 0.9229 | 0.7671 | 0.9653 | 0.1165 |
| C1QTNF5    | 0.9787 | 1.0868 | 0.9245 | 0.8712 | 0.9653 | 0.0461 |
| TSHZ1      | 0.9849 | 1.2779 | 0.9244 | 0.6740 | 0.9653 | 0.1240 |
| LOC641815  | 0.9846 | 1.0035 | 1.0083 | 0.8648 | 0.9653 | 0.0339 |

|            |        |        |        |        |        |        |
|------------|--------|--------|--------|--------|--------|--------|
| LOC1001315 | 0.9142 | 1.0586 | 1.0133 | 0.8750 | 0.9653 | 0.0426 |
| LOC642252  | 0.8958 | 1.1012 | 0.9516 | 0.9126 | 0.9653 | 0.0468 |
| RBM11      | 0.9280 | 1.0436 | 0.9773 | 0.9124 | 0.9653 | 0.0295 |
| LOC1001339 | 0.9223 | 1.0873 | 0.9156 | 0.9360 | 0.9653 | 0.0409 |
| FGF9       | 1.0105 | 0.9805 | 0.9748 | 0.8955 | 0.9653 | 0.0246 |
| NFKBIL2    | 0.9100 | 1.0843 | 0.9835 | 0.8834 | 0.9653 | 0.0450 |
| LOC653641  | 1.0189 | 1.0410 | 0.9073 | 0.8940 | 0.9653 | 0.0377 |
| LOC1001285 | 0.9224 | 1.0335 | 1.0118 | 0.8936 | 0.9653 | 0.0339 |
| LOC146439  | 0.7029 | 1.2592 | 1.0804 | 0.8189 | 0.9653 | 0.1258 |
| PPP3CC     | 0.8785 | 1.2804 | 0.9688 | 0.7336 | 0.9653 | 0.1157 |
| FLJ42289   | 0.8680 | 1.1218 | 1.0039 | 0.8677 | 0.9653 | 0.0612 |
| LOC1001309 | 0.8102 | 1.0035 | 1.0880 | 0.9597 | 0.9653 | 0.0582 |
| INPP5A     | 0.9576 | 1.1732 | 0.9711 | 0.7594 | 0.9653 | 0.0845 |
| ZFAT       | 0.9457 | 1.0252 | 1.0030 | 0.8875 | 0.9654 | 0.0309 |
| ERCC-00071 | 0.8796 | 1.1023 | 0.9654 | 0.9141 | 0.9654 | 0.0489 |
| UGT1A7     | 0.9619 | 1.0300 | 1.0460 | 0.8235 | 0.9654 | 0.0507 |
| LOC644413  | 0.9531 | 1.0365 | 0.9123 | 0.9595 | 0.9654 | 0.0259 |
| LOC645708  | 0.9019 | 1.0891 | 1.0208 | 0.8496 | 0.9654 | 0.0546 |
| GPR85      | 0.9057 | 1.0637 | 0.9230 | 0.9691 | 0.9654 | 0.0354 |
| FAM87A     | 0.8633 | 1.0640 | 1.1329 | 0.8013 | 0.9654 | 0.0791 |
| IQSEC1     | 0.8684 | 1.2929 | 0.8468 | 0.8534 | 0.9654 | 0.1093 |
| FMR1NB     | 0.8541 | 1.0144 | 1.0082 | 0.9848 | 0.9654 | 0.0376 |
| FIS1       | 0.9077 | 1.2560 | 0.9935 | 0.7044 | 0.9654 | 0.1143 |
| LOC1001318 | 0.8249 | 1.1054 | 1.0582 | 0.8731 | 0.9654 | 0.0686 |
| LOC650799  | 0.9423 | 1.0595 | 0.9886 | 0.8711 | 0.9654 | 0.0396 |
| LOC388474  | 0.8879 | 1.1915 | 0.9928 | 0.7895 | 0.9654 | 0.0860 |
| STYX       | 0.8633 | 1.1249 | 1.0071 | 0.8663 | 0.9654 | 0.0629 |
| FETUB      | 0.9870 | 1.1157 | 0.9040 | 0.8550 | 0.9654 | 0.0570 |
| DEFA3      | 0.8694 | 1.0839 | 1.0130 | 0.8953 | 0.9654 | 0.0504 |
| PANK4      | 1.1017 | 1.0862 | 0.9336 | 0.7402 | 0.9654 | 0.0841 |
| KL         | 0.9563 | 1.0315 | 0.8957 | 0.9782 | 0.9654 | 0.0281 |
| LOC643943  | 0.8407 | 1.1078 | 1.0323 | 0.8810 | 0.9654 | 0.0629 |
| KRT84      | 0.8161 | 1.1528 | 1.0419 | 0.8509 | 0.9654 | 0.0798 |
| MIR129-1   | 0.8941 | 1.0556 | 1.0236 | 0.8885 | 0.9654 | 0.0433 |
| ARL8B      | 0.9285 | 1.1801 | 1.1530 | 0.6001 | 0.9654 | 0.1342 |
| NDUFS4     | 0.8572 | 1.2034 | 1.0861 | 0.7150 | 0.9654 | 0.1102 |
| LOC646574  | 0.9124 | 1.0214 | 1.0337 | 0.8942 | 0.9654 | 0.0361 |
| LOC646604  | 0.9787 | 0.9257 | 1.0063 | 0.9510 | 0.9654 | 0.0174 |
| LOC645879  | 0.9667 | 1.0623 | 0.9919 | 0.8409 | 0.9655 | 0.0462 |
| ACMSD      | 0.8970 | 1.0788 | 1.0615 | 0.8245 | 0.9655 | 0.0623 |
| CD79A      | 0.8517 | 1.0754 | 1.0914 | 0.8433 | 0.9655 | 0.0682 |
| DIRAS1     | 0.9093 | 1.0669 | 1.0196 | 0.8661 | 0.9655 | 0.0468 |
| LOC1001327 | 0.9621 | 1.0388 | 1.0130 | 0.8479 | 0.9655 | 0.0423 |
| MIR1276    | 0.9181 | 1.0855 | 0.9217 | 0.9365 | 0.9655 | 0.0402 |
| LOC1001302 | 0.9903 | 1.0356 | 0.9566 | 0.8794 | 0.9655 | 0.0329 |
| TCF15      | 0.9010 | 1.0199 | 1.0499 | 0.8911 | 0.9655 | 0.0406 |



|            |        |        |        |        |        |        |
|------------|--------|--------|--------|--------|--------|--------|
| LOC651896  | 0.9198 | 1.0739 | 0.9056 | 0.9625 | 0.9655 | 0.0381 |
| LOC648934  | 0.8620 | 1.1252 | 0.8862 | 0.9885 | 0.9655 | 0.0599 |
| ZNF491     | 0.9153 | 1.0943 | 0.9305 | 0.9218 | 0.9655 | 0.0431 |
| SNORA15    | 1.0249 | 0.9689 | 0.9438 | 0.9243 | 0.9655 | 0.0218 |
| LOC126235  | 0.9459 | 1.0310 | 0.9757 | 0.9094 | 0.9655 | 0.0257 |
| LOC360030  | 0.9190 | 1.0720 | 0.9617 | 0.9094 | 0.9655 | 0.0373 |
| MIR199A2   | 0.8221 | 1.1048 | 1.0348 | 0.9004 | 0.9655 | 0.0639 |
| LOC651536  | 0.9124 | 1.0779 | 1.0497 | 0.8221 | 0.9655 | 0.0599 |
| SCARNA14   | 0.8584 | 1.0836 | 1.0194 | 0.9006 | 0.9655 | 0.0521 |
| PCDHA7     | 0.9631 | 1.0464 | 0.9839 | 0.8687 | 0.9655 | 0.0368 |
| LOC391241  | 1.0190 | 1.0542 | 0.9196 | 0.8693 | 0.9655 | 0.0429 |
| IFFO2      | 0.9047 | 1.0779 | 1.0262 | 0.8532 | 0.9655 | 0.0521 |
| LOC644135  | 1.0208 | 1.0855 | 0.9122 | 0.8436 | 0.9655 | 0.0541 |
| ANP32E     | 0.8639 | 1.1041 | 0.9810 | 0.9131 | 0.9655 | 0.0521 |
| KIR2DL5B   | 0.9168 | 1.0220 | 1.0108 | 0.9125 | 0.9655 | 0.0295 |
| TECPR2     | 0.9387 | 1.0298 | 0.9735 | 0.9202 | 0.9655 | 0.0241 |
| LOC1001337 | 0.8437 | 0.9802 | 1.0656 | 0.9727 | 0.9655 | 0.0458 |
| LOC728348  | 0.8697 | 1.0799 | 1.0486 | 0.8639 | 0.9655 | 0.0574 |
| PARP15     | 0.8719 | 1.0473 | 1.0259 | 0.9171 | 0.9655 | 0.0423 |
| FBXO24     | 0.9320 | 1.0620 | 0.9288 | 0.9395 | 0.9655 | 0.0322 |
| LOC1001323 | 0.9107 | 1.0792 | 0.9862 | 0.8861 | 0.9655 | 0.0435 |
| LGR6       | 0.9507 | 1.0625 | 0.9425 | 0.9065 | 0.9656 | 0.0337 |
| LOC1001280 | 0.9198 | 0.9914 | 1.0650 | 0.8860 | 0.9656 | 0.0398 |
| LOC728054  | 0.9567 | 1.0403 | 0.9777 | 0.8875 | 0.9656 | 0.0315 |
| LOC650296  | 0.9832 | 1.0832 | 0.9654 | 0.8304 | 0.9656 | 0.0520 |
| LOC1001325 | 0.8948 | 0.9872 | 1.0420 | 0.9382 | 0.9656 | 0.0317 |
| LOC646067  | 0.9303 | 1.1627 | 0.9146 | 0.8547 | 0.9656 | 0.0677 |
| LOC647646  | 0.9691 | 1.0745 | 0.9677 | 0.8509 | 0.9656 | 0.0457 |
| LOC401222  | 0.9146 | 1.0437 | 1.0127 | 0.8913 | 0.9656 | 0.0370 |
| DNAJC28    | 0.9482 | 1.0646 | 1.0331 | 0.8164 | 0.9656 | 0.0555 |
| PMS2CL     | 0.9062 | 1.1108 | 1.0425 | 0.8027 | 0.9656 | 0.0690 |
| GPR31      | 0.9508 | 1.0428 | 0.9902 | 0.8785 | 0.9656 | 0.0346 |
| LRMP       | 0.8682 | 1.0057 | 1.0365 | 0.9520 | 0.9656 | 0.0369 |
| LOC646458  | 0.9536 | 1.0150 | 0.9891 | 0.9046 | 0.9656 | 0.0239 |
| LOC1001320 | 0.9199 | 1.0672 | 0.9709 | 0.9043 | 0.9656 | 0.0367 |
| C1orf150   | 0.9149 | 0.9435 | 1.0772 | 0.9268 | 0.9656 | 0.0377 |
| IRAK3      | 0.9308 | 0.9832 | 1.0278 | 0.9207 | 0.9656 | 0.0248 |
| LOC1001302 | 1.0193 | 0.9769 | 0.8623 | 1.0040 | 0.9656 | 0.0355 |
| SNORD117   | 0.8828 | 0.9929 | 1.0755 | 0.9113 | 0.9656 | 0.0434 |
| SORBS1     | 0.9055 | 1.1000 | 0.9608 | 0.8962 | 0.9656 | 0.0470 |
| DUSP15     | 0.9110 | 1.0585 | 0.9973 | 0.8956 | 0.9656 | 0.0382 |
| PRSS7      | 0.8234 | 1.0337 | 1.0273 | 0.9781 | 0.9656 | 0.0490 |
| LOC400804  | 0.9569 | 1.0323 | 0.9499 | 0.9233 | 0.9656 | 0.0234 |
| SERPINB7   | 0.9462 | 1.0289 | 1.0082 | 0.8792 | 0.9656 | 0.0337 |
| LOC730841  | 0.8578 | 1.0526 | 1.0702 | 0.8820 | 0.9656 | 0.0556 |
| TGS1       | 0.9634 | 1.0381 | 0.9560 | 0.9052 | 0.9656 | 0.0274 |

|            |        |        |        |        |        |        |
|------------|--------|--------|--------|--------|--------|--------|
| CACNG1     | 0.9855 | 1.0865 | 0.9598 | 0.8307 | 0.9656 | 0.0526 |
| MIRLET7E   | 0.8466 | 1.0773 | 0.9973 | 0.9415 | 0.9656 | 0.0485 |
| LOC653696  | 1.0068 | 1.0622 | 1.0431 | 0.7505 | 0.9657 | 0.0726 |
| LOC650638  | 0.8440 | 1.0290 | 1.1384 | 0.8512 | 0.9657 | 0.0717 |
| PLGLA      | 0.9557 | 1.0639 | 0.9870 | 0.8560 | 0.9657 | 0.0430 |
| LOC641943  | 0.9001 | 1.1009 | 1.0067 | 0.8549 | 0.9657 | 0.0552 |
| TULP2      | 0.9649 | 1.1006 | 0.8865 | 0.9107 | 0.9657 | 0.0479 |
| LOC652463  | 0.8263 | 1.1614 | 1.0079 | 0.8670 | 0.9657 | 0.0760 |
| KLHL6      | 0.8839 | 1.0941 | 0.9188 | 0.9658 | 0.9657 | 0.0460 |
| GIPC3      | 0.9579 | 1.0707 | 0.9713 | 0.8627 | 0.9657 | 0.0426 |
| LOC648354  | 0.9570 | 0.9691 | 0.9833 | 0.9533 | 0.9657 | 0.0068 |
| MPP7       | 0.8604 | 1.1085 | 1.0439 | 0.8499 | 0.9657 | 0.0652 |
| CACNB1     | 0.9546 | 1.0639 | 1.0064 | 0.8377 | 0.9657 | 0.0481 |
| LOC402643  | 0.9658 | 1.0926 | 0.9964 | 0.8079 | 0.9657 | 0.0591 |
| LOC1001326 | 0.9985 | 1.0407 | 0.9606 | 0.8629 | 0.9657 | 0.0380 |
| C21orf49   | 0.8874 | 1.0808 | 0.9844 | 0.9101 | 0.9657 | 0.0436 |
| PRKACA     | 0.9766 | 1.0894 | 0.9411 | 0.8556 | 0.9657 | 0.0484 |
| RTN2       | 0.9360 | 1.0629 | 0.9298 | 0.9340 | 0.9657 | 0.0324 |
| CHST15     | 0.9761 | 1.1532 | 0.9275 | 0.8060 | 0.9657 | 0.0720 |
| LOC1001311 | 0.8853 | 1.0390 | 0.9515 | 0.9869 | 0.9657 | 0.0322 |
| FN3K       | 1.0264 | 1.0918 | 0.8803 | 0.8643 | 0.9657 | 0.0556 |
| MIR525     | 0.9119 | 1.0358 | 0.9690 | 0.9461 | 0.9657 | 0.0262 |
| FAM115C    | 0.9673 | 1.0429 | 0.9514 | 0.9012 | 0.9657 | 0.0294 |
| CLCF1      | 0.9658 | 1.0707 | 0.9808 | 0.8455 | 0.9657 | 0.0463 |
| UBN1       | 0.9900 | 1.2925 | 0.8853 | 0.6950 | 0.9657 | 0.1249 |
| LOC401252  | 0.9047 | 1.0327 | 1.0068 | 0.9186 | 0.9657 | 0.0318 |
| AQP4       | 0.9510 | 1.0398 | 1.0270 | 0.8451 | 0.9657 | 0.0447 |
| KRTAP20-1  | 1.0400 | 1.0338 | 0.9938 | 0.7954 | 0.9657 | 0.0577 |
| TREX2      | 0.8791 | 1.1630 | 0.9993 | 0.8214 | 0.9657 | 0.0755 |
| OR4C13     | 1.0036 | 0.9348 | 1.0789 | 0.8456 | 0.9657 | 0.0497 |
| LOC642473  | 0.8624 | 1.0053 | 1.0889 | 0.9063 | 0.9657 | 0.0508 |
| KCTD19     | 0.9565 | 0.9777 | 1.0004 | 0.9282 | 0.9657 | 0.0154 |
| LOC643082  | 0.8316 | 1.2145 | 0.9374 | 0.8794 | 0.9657 | 0.0857 |
| GRID1      | 0.8962 | 0.9144 | 1.0986 | 0.9538 | 0.9657 | 0.0459 |
| CDA        | 0.9836 | 1.0287 | 0.9824 | 0.8683 | 0.9657 | 0.0342 |
| GUCA1B     | 0.9565 | 1.0491 | 0.9301 | 0.9272 | 0.9657 | 0.0286 |
| FLJ30375   | 0.9327 | 1.0769 | 0.9151 | 0.9382 | 0.9657 | 0.0374 |
| CLEC3B     | 0.9331 | 1.0220 | 1.0689 | 0.8390 | 0.9658 | 0.0508 |
| LENG8      | 0.9114 | 1.1106 | 0.9562 | 0.8849 | 0.9658 | 0.0505 |
| LOC645320  | 0.9668 | 1.0348 | 0.9992 | 0.8623 | 0.9658 | 0.0372 |
| ARSJ       | 0.8891 | 1.0887 | 0.9908 | 0.8945 | 0.9658 | 0.0472 |
| ZNF509     | 0.9101 | 1.1132 | 0.9994 | 0.8404 | 0.9658 | 0.0589 |
| LOC440248  | 0.9036 | 0.9937 | 1.1431 | 0.8227 | 0.9658 | 0.0686 |
| PRSS42     | 0.9839 | 1.0291 | 0.9237 | 0.9265 | 0.9658 | 0.0253 |
| LOC642111  | 0.9266 | 0.9873 | 1.0398 | 0.9094 | 0.9658 | 0.0298 |
| LOC644623  | 0.9252 | 1.0737 | 0.9574 | 0.9069 | 0.9658 | 0.0375 |

|            |        |        |        |        |        |        |
|------------|--------|--------|--------|--------|--------|--------|
| LOC728743  | 0.9114 | 1.1087 | 1.0568 | 0.7861 | 0.9658 | 0.0730 |
| OMD        | 0.9833 | 1.0447 | 0.9695 | 0.8656 | 0.9658 | 0.0372 |
| LOC646132  | 0.9153 | 1.0268 | 1.0892 | 0.8318 | 0.9658 | 0.0574 |
| LOC400958  | 0.9400 | 1.1170 | 0.8901 | 0.9162 | 0.9658 | 0.0514 |
| PCDHB19P   | 0.9980 | 1.0271 | 0.8258 | 1.0123 | 0.9658 | 0.0470 |
| ADAMTS20   | 0.9671 | 1.0349 | 0.9926 | 0.8686 | 0.9658 | 0.0353 |
| SNORD116-2 | 1.0097 | 0.9760 | 1.0797 | 0.7977 | 0.9658 | 0.0600 |
| DPY19L2P2  | 0.8741 | 1.0462 | 1.0703 | 0.8726 | 0.9658 | 0.0536 |
| LOC134145  | 0.7756 | 1.1783 | 1.0393 | 0.8701 | 0.9658 | 0.0894 |
| LOC653107  | 0.9048 | 1.1198 | 0.9644 | 0.8743 | 0.9658 | 0.0546 |
| LOC401498  | 0.8957 | 1.1111 | 1.0458 | 0.8106 | 0.9658 | 0.0686 |
| LOC1001332 | 0.8946 | 1.0861 | 0.9954 | 0.8872 | 0.9658 | 0.0471 |
| SDR16C5    | 0.9973 | 1.0094 | 0.8832 | 0.9734 | 0.9658 | 0.0285 |
| ZPBP2      | 0.9174 | 1.0575 | 1.0065 | 0.8819 | 0.9658 | 0.0403 |
| LOC729786  | 0.9192 | 1.1188 | 1.0634 | 0.7619 | 0.9658 | 0.0799 |
| BFSP2      | 0.9427 | 1.0530 | 0.9661 | 0.9015 | 0.9658 | 0.0320 |
| ATG16L2    | 1.0425 | 1.0528 | 1.0299 | 0.7382 | 0.9658 | 0.0760 |
| LOC1001322 | 0.9518 | 1.0867 | 0.9720 | 0.8528 | 0.9658 | 0.0480 |
| IRF2       | 0.9615 | 1.0625 | 0.9901 | 0.8493 | 0.9658 | 0.0443 |
| LOC1001339 | 0.9282 | 1.0662 | 0.9326 | 0.9363 | 0.9658 | 0.0335 |
| SEC14L2    | 1.0586 | 1.0370 | 0.9303 | 0.8376 | 0.9659 | 0.0511 |
| LOC642316  | 1.0486 | 1.0305 | 0.8341 | 0.9502 | 0.9659 | 0.0488 |
| PDLIM4     | 1.0313 | 0.9435 | 1.0676 | 0.8210 | 0.9659 | 0.0549 |
| LOC1001330 | 0.9019 | 1.0565 | 0.9670 | 0.9381 | 0.9659 | 0.0330 |
| PRAMEF22   | 0.9575 | 1.0269 | 1.0273 | 0.8517 | 0.9659 | 0.0414 |
| LOC642546  | 0.8874 | 0.9576 | 1.0616 | 0.9568 | 0.9659 | 0.0359 |
| IKBKE      | 0.9698 | 1.1442 | 0.9834 | 0.7661 | 0.9659 | 0.0775 |
| DGKZ       | 0.8993 | 1.0650 | 1.0004 | 0.8988 | 0.9659 | 0.0408 |
| LOC1001328 | 1.0422 | 0.9980 | 0.9788 | 0.8446 | 0.9659 | 0.0426 |
| TDRD9      | 0.9544 | 1.0627 | 0.9517 | 0.8948 | 0.9659 | 0.0351 |
| RGN        | 0.9404 | 1.0179 | 1.0047 | 0.9007 | 0.9659 | 0.0276 |
| LOC1001340 | 0.9200 | 1.0474 | 1.0654 | 0.8310 | 0.9659 | 0.0554 |
| LOC642398  | 0.9039 | 1.0496 | 1.0404 | 0.8698 | 0.9659 | 0.0462 |
| MIR376A1   | 0.8820 | 1.2013 | 0.9286 | 0.8518 | 0.9659 | 0.0800 |
| LOC647243  | 0.8757 | 0.9510 | 1.0068 | 1.0302 | 0.9659 | 0.0344 |
| LOC401397  | 0.8463 | 1.1923 | 1.0936 | 0.7316 | 0.9659 | 0.1068 |
| COL5A1     | 0.8453 | 1.0620 | 1.0209 | 0.9355 | 0.9659 | 0.0481 |
| LOC644598  | 0.8954 | 1.1002 | 1.0159 | 0.8522 | 0.9659 | 0.0566 |
| OR1J2      | 0.9382 | 1.0531 | 1.0926 | 0.7799 | 0.9660 | 0.0701 |
| AQP7P2     | 0.9344 | 1.0738 | 0.9922 | 0.8635 | 0.9660 | 0.0445 |
| RBMV3AP    | 0.9502 | 1.0202 | 0.9974 | 0.8961 | 0.9660 | 0.0275 |
| LOC650037  | 0.8985 | 1.0241 | 1.1087 | 0.8326 | 0.9660 | 0.0620 |
| WDR45L     | 0.8442 | 1.3775 | 0.8509 | 0.7913 | 0.9660 | 0.1378 |
| LOC729866  | 0.8808 | 1.0704 | 0.9938 | 0.9189 | 0.9660 | 0.0420 |
| ZFP42      | 0.8970 | 0.9806 | 1.0112 | 0.9751 | 0.9660 | 0.0243 |
| RN7SL1     | 0.8313 | 1.2968 | 1.0155 | 0.7203 | 0.9660 | 0.1260 |

|            |        |        |        |        |        |        |
|------------|--------|--------|--------|--------|--------|--------|
| ANKRD45    | 0.9968 | 1.0312 | 0.9858 | 0.8501 | 0.9660 | 0.0398 |
| SCN11A     | 0.9018 | 1.0443 | 1.0688 | 0.8491 | 0.9660 | 0.0536 |
| ZNF397     | 0.8228 | 1.2008 | 0.9494 | 0.8911 | 0.9660 | 0.0824 |
| KDM1B      | 0.8823 | 1.0339 | 1.0796 | 0.8682 | 0.9660 | 0.0533 |
| LOC1001310 | 0.8476 | 1.1037 | 1.0304 | 0.8824 | 0.9660 | 0.0606 |
| OR2AK2     | 0.8720 | 0.9547 | 1.0256 | 1.0117 | 0.9660 | 0.0349 |
| LOC730011  | 0.8714 | 1.0198 | 1.0430 | 0.9299 | 0.9660 | 0.0399 |
| KIRREL     | 0.9013 | 0.9999 | 1.0922 | 0.8707 | 0.9660 | 0.0503 |
| LOC653686  | 0.9537 | 1.0350 | 0.9718 | 0.9036 | 0.9660 | 0.0271 |
| LOC641950  | 0.9328 | 1.1034 | 0.9884 | 0.8395 | 0.9660 | 0.0551 |
| PIWIL3     | 0.9631 | 0.9927 | 1.0184 | 0.8899 | 0.9660 | 0.0278 |
| LOC730045  | 0.8952 | 1.1007 | 0.9962 | 0.8720 | 0.9660 | 0.0524 |
| FMNL3      | 0.9907 | 0.9882 | 0.9603 | 0.9250 | 0.9660 | 0.0153 |
| AVPR2      | 0.9051 | 1.0899 | 1.0751 | 0.7941 | 0.9660 | 0.0710 |
| LOC731414  | 0.8154 | 1.0994 | 1.0786 | 0.8707 | 0.9660 | 0.0720 |
| NKX1-1     | 0.9037 | 1.0210 | 1.0049 | 0.9346 | 0.9660 | 0.0280 |
| FLJ41562   | 0.9262 | 1.1308 | 0.9814 | 0.8258 | 0.9661 | 0.0637 |
| MIR1471    | 0.9280 | 0.9991 | 1.0149 | 0.9222 | 0.9661 | 0.0239 |
| LOC1001326 | 0.9261 | 1.0005 | 1.0191 | 0.9186 | 0.9661 | 0.0256 |
| LOC285484  | 0.9021 | 1.0891 | 1.0449 | 0.8282 | 0.9661 | 0.0608 |
| LOC1001331 | 0.9405 | 1.0558 | 0.9738 | 0.8942 | 0.9661 | 0.0341 |
| ZNF846     | 1.0054 | 1.1139 | 0.9422 | 0.8028 | 0.9661 | 0.0650 |
| CSF2RB     | 1.0406 | 0.9528 | 0.9651 | 0.9058 | 0.9661 | 0.0279 |
| LOC347376  | 0.7389 | 1.0513 | 1.2484 | 0.8257 | 0.9661 | 0.1148 |
| LOC652677  | 0.9381 | 1.0171 | 1.0388 | 0.8704 | 0.9661 | 0.0385 |
| LOC651467  | 1.0376 | 0.9750 | 0.8945 | 0.9572 | 0.9661 | 0.0294 |
| LOC653601  | 1.0298 | 1.0160 | 0.9199 | 0.8988 | 0.9661 | 0.0332 |
| LOC90113   | 1.0139 | 0.9941 | 1.0353 | 0.8210 | 0.9661 | 0.0491 |
| GPN1       | 0.8229 | 1.5561 | 0.9008 | 0.5846 | 0.9661 | 0.2079 |
| LOC649103  | 0.8343 | 1.2472 | 0.9651 | 0.8178 | 0.9661 | 0.0993 |
| LOC541471  | 0.7754 | 1.2088 | 1.0764 | 0.8037 | 0.9661 | 0.1056 |
| LOC643983  | 1.0289 | 1.0131 | 0.9396 | 0.8828 | 0.9661 | 0.0339 |
| LOC143188  | 0.9681 | 1.0367 | 1.0676 | 0.7920 | 0.9661 | 0.0617 |
| KRTAP19-3  | 0.9158 | 1.1092 | 0.9305 | 0.9090 | 0.9661 | 0.0479 |
| LOC653934  | 0.8281 | 1.1710 | 0.9498 | 0.9154 | 0.9661 | 0.0729 |
| SFTPC      | 0.8766 | 1.0603 | 1.0186 | 0.9089 | 0.9661 | 0.0437 |
| LOC645153  | 0.9140 | 1.0928 | 0.9580 | 0.8996 | 0.9661 | 0.0440 |
| HOXB1      | 0.8533 | 1.0834 | 1.0511 | 0.8767 | 0.9661 | 0.0589 |
| LOC642148  | 0.9371 | 0.9902 | 1.1018 | 0.8354 | 0.9661 | 0.0555 |
| LOC644670  | 0.8915 | 1.1530 | 1.0134 | 0.8066 | 0.9661 | 0.0754 |
| LRRTM1     | 0.9369 | 1.0755 | 0.9661 | 0.8860 | 0.9661 | 0.0400 |
| LOC1001308 | 0.9239 | 1.0568 | 0.9915 | 0.8923 | 0.9661 | 0.0366 |
| ABCA6      | 0.9910 | 1.0501 | 0.9442 | 0.8793 | 0.9661 | 0.0362 |
| LOC730049  | 0.9958 | 0.9950 | 1.0195 | 0.8543 | 0.9662 | 0.0377 |
| LOC647283  | 0.8854 | 1.0687 | 0.9708 | 0.9397 | 0.9662 | 0.0385 |
| NAT2       | 0.8165 | 1.1129 | 1.0595 | 0.8756 | 0.9662 | 0.0712 |

|            |        |        |        |        |        |        |
|------------|--------|--------|--------|--------|--------|--------|
| CFLAR      | 0.7325 | 1.2068 | 1.0990 | 0.8264 | 0.9662 | 0.1117 |
| BRDT       | 0.8702 | 1.1410 | 1.0763 | 0.7771 | 0.9662 | 0.0854 |
| LOC90925   | 0.9652 | 1.0480 | 0.9293 | 0.9221 | 0.9662 | 0.0289 |
| CXorf55    | 1.0362 | 1.0773 | 0.9443 | 0.8069 | 0.9662 | 0.0599 |
| LOC642594  | 1.0266 | 1.0341 | 0.8973 | 0.9068 | 0.9662 | 0.0371 |
| DAZL       | 0.9566 | 1.0248 | 0.9699 | 0.9134 | 0.9662 | 0.0229 |
| DKFZP686C2 | 0.9505 | 0.9411 | 0.9945 | 0.9785 | 0.9662 | 0.0123 |
| C18orf12   | 0.8777 | 1.0586 | 1.0061 | 0.9223 | 0.9662 | 0.0407 |
| MT1B       | 0.9022 | 1.0161 | 1.0561 | 0.8904 | 0.9662 | 0.0412 |
| MITF       | 0.8496 | 1.1056 | 1.0793 | 0.8302 | 0.9662 | 0.0732 |
| FBXL6      | 0.8155 | 1.2668 | 1.0163 | 0.7663 | 0.9662 | 0.1138 |
| LOC401164  | 0.9807 | 1.0775 | 0.9618 | 0.8448 | 0.9662 | 0.0477 |
| LOC730273  | 0.8481 | 1.1986 | 0.9864 | 0.8319 | 0.9662 | 0.0849 |
| TNNI3      | 0.9648 | 0.9836 | 1.0023 | 0.9141 | 0.9662 | 0.0190 |
| CCL4L1     | 1.0656 | 0.9941 | 0.9612 | 0.8440 | 0.9662 | 0.0462 |
| LOC1001293 | 1.0118 | 1.0800 | 0.9480 | 0.8251 | 0.9662 | 0.0542 |
| LOC648815  | 0.9000 | 1.0331 | 1.0250 | 0.9069 | 0.9662 | 0.0363 |
| LOC440261  | 0.9152 | 1.0132 | 1.0759 | 0.8607 | 0.9662 | 0.0483 |
| COL3A1     | 0.9225 | 1.1442 | 1.0844 | 0.7139 | 0.9662 | 0.0963 |
| TMLHE      | 0.9215 | 1.0814 | 1.0086 | 0.8535 | 0.9662 | 0.0498 |
| RANGRF     | 0.9787 | 1.0609 | 0.8930 | 0.9323 | 0.9662 | 0.0361 |
| HIST1H4G   | 0.8993 | 1.0329 | 1.0064 | 0.9264 | 0.9662 | 0.0318 |
| LOC391073  | 0.9735 | 1.1073 | 0.9089 | 0.8752 | 0.9662 | 0.0513 |
| CLIC2      | 0.8880 | 1.1117 | 0.9785 | 0.8869 | 0.9662 | 0.0530 |
| DTYMK      | 1.0373 | 1.0354 | 0.9088 | 0.8834 | 0.9662 | 0.0408 |
| TRH        | 0.9077 | 1.1130 | 0.9392 | 0.9051 | 0.9662 | 0.0495 |
| LOC650599  | 0.8714 | 1.0455 | 0.9630 | 0.9851 | 0.9662 | 0.0361 |
| CCR8       | 0.9231 | 0.9757 | 1.0407 | 0.9254 | 0.9662 | 0.0276 |
| LOC1001280 | 0.8971 | 1.0973 | 1.0281 | 0.8425 | 0.9662 | 0.0585 |
| C5orf62    | 0.9544 | 0.8946 | 1.0696 | 0.9464 | 0.9663 | 0.0369 |
| TLL2       | 0.8953 | 1.0635 | 0.9994 | 0.9068 | 0.9663 | 0.0399 |
| ARHGAP9    | 0.8719 | 1.1372 | 0.9308 | 0.9252 | 0.9663 | 0.0585 |
| MAGEA2B    | 0.9135 | 1.1547 | 0.9009 | 0.8960 | 0.9663 | 0.0629 |
| GSDMB      | 0.9043 | 1.1012 | 0.9707 | 0.8889 | 0.9663 | 0.0483 |
| LOC642975  | 0.8086 | 1.2011 | 1.1907 | 0.6648 | 0.9663 | 0.1358 |
| TRPM2      | 0.8672 | 1.0531 | 1.0807 | 0.8641 | 0.9663 | 0.0584 |
| LOC727839  | 0.8322 | 1.0826 | 1.0451 | 0.9053 | 0.9663 | 0.0588 |
| LOC652848  | 0.9855 | 1.0178 | 0.9698 | 0.8922 | 0.9663 | 0.0266 |
| C5orf38    | 0.8710 | 1.0323 | 1.0561 | 0.9058 | 0.9663 | 0.0458 |
| CDH12      | 0.8628 | 0.9507 | 1.1189 | 0.9329 | 0.9663 | 0.0543 |
| ARMC9      | 0.8353 | 1.1220 | 0.9896 | 0.9183 | 0.9663 | 0.0607 |
| CCDC79     | 0.9319 | 0.9849 | 1.0154 | 0.9329 | 0.9663 | 0.0205 |
| LOC390595  | 0.9120 | 1.0480 | 1.0178 | 0.8874 | 0.9663 | 0.0393 |
| LOC650020  | 0.9901 | 1.1520 | 0.9797 | 0.7435 | 0.9663 | 0.0841 |
| LOC653581  | 0.8369 | 1.1980 | 0.9868 | 0.8435 | 0.9663 | 0.0846 |
| HYAL1      | 0.9202 | 1.0205 | 1.0387 | 0.8858 | 0.9663 | 0.0374 |

|            |        |        |        |        |        |        |
|------------|--------|--------|--------|--------|--------|--------|
| ZNF844     | 0.9423 | 1.0527 | 1.0684 | 0.8018 | 0.9663 | 0.0616 |
| KIF25      | 0.9392 | 0.9984 | 1.0405 | 0.8871 | 0.9663 | 0.0336 |
| SHANK1     | 0.7394 | 1.0421 | 1.1365 | 0.9473 | 0.9663 | 0.0849 |
| LOC642821  | 0.8996 | 1.0383 | 0.9989 | 0.9285 | 0.9663 | 0.0318 |
| CTRC       | 0.9511 | 0.9828 | 1.0438 | 0.8877 | 0.9663 | 0.0325 |
| BCORL2     | 0.8780 | 0.9806 | 1.0873 | 0.9195 | 0.9663 | 0.0455 |
| MIR298     | 0.9605 | 1.0735 | 0.8726 | 0.9587 | 0.9663 | 0.0412 |
| ARGFXP2    | 0.9308 | 1.0349 | 0.9833 | 0.9164 | 0.9663 | 0.0270 |
| ANXA2P2    | 0.8095 | 1.3672 | 0.9481 | 0.7406 | 0.9663 | 0.1404 |
| WHSC2      | 0.7667 | 1.3077 | 0.9726 | 0.8183 | 0.9663 | 0.1219 |
| DNAJC1     | 0.7353 | 1.3389 | 1.0532 | 0.7379 | 0.9663 | 0.1449 |
| SCARA3     | 0.9310 | 1.0894 | 0.9806 | 0.8644 | 0.9663 | 0.0474 |
| ZNF630     | 0.8971 | 1.1153 | 0.9532 | 0.8999 | 0.9664 | 0.0513 |
| LIPK       | 0.9635 | 1.0298 | 0.9624 | 0.9097 | 0.9664 | 0.0246 |
| LOC642104  | 0.9622 | 1.0241 | 1.0347 | 0.8444 | 0.9664 | 0.0437 |
| C15orf21   | 0.8893 | 1.1374 | 0.9804 | 0.8583 | 0.9664 | 0.0626 |
| KRT3       | 0.9044 | 1.1096 | 0.9996 | 0.8517 | 0.9664 | 0.0567 |
| ZNF808     | 1.0028 | 0.9992 | 1.0177 | 0.8457 | 0.9664 | 0.0404 |
| LOC728716  | 0.9512 | 1.0577 | 0.9353 | 0.9212 | 0.9664 | 0.0311 |
| LOC642119  | 0.9661 | 1.0041 | 0.9563 | 0.9390 | 0.9664 | 0.0138 |
| LOC654128  | 0.9463 | 0.9708 | 1.0193 | 0.9291 | 0.9664 | 0.0196 |
| NGF        | 0.9261 | 1.0805 | 0.9324 | 0.9265 | 0.9664 | 0.0381 |
| IL8        | 0.9193 | 1.0864 | 1.0153 | 0.8445 | 0.9664 | 0.0531 |
| TNFRSF9    | 0.9624 | 1.0892 | 0.9852 | 0.8287 | 0.9664 | 0.0535 |
| LOC653507  | 0.8651 | 1.1275 | 0.9864 | 0.8865 | 0.9664 | 0.0599 |
| PIGL       | 0.7894 | 1.1823 | 0.9252 | 0.9686 | 0.9664 | 0.0815 |
| SNORD116-2 | 0.8989 | 1.1200 | 0.9203 | 0.9263 | 0.9664 | 0.0515 |
| LOC644019  | 0.8586 | 1.0997 | 0.9894 | 0.9179 | 0.9664 | 0.0519 |
| OR2D3      | 0.7755 | 1.0668 | 1.1316 | 0.8917 | 0.9664 | 0.0813 |
| C6orf225   | 0.9752 | 1.0440 | 0.9777 | 0.8686 | 0.9664 | 0.0363 |
| TRIM8      | 0.7952 | 1.2831 | 1.0766 | 0.7107 | 0.9664 | 0.1314 |
| EXTL1      | 0.8719 | 1.0679 | 1.0075 | 0.9184 | 0.9664 | 0.0440 |
| LOC649771  | 0.8810 | 0.9765 | 1.0245 | 0.9836 | 0.9664 | 0.0304 |
| LOC648982  | 0.9961 | 1.0128 | 0.9756 | 0.8811 | 0.9664 | 0.0294 |
| CXorf21    | 0.9036 | 1.0903 | 0.9720 | 0.8997 | 0.9664 | 0.0445 |
| LOC642718  | 0.9513 | 1.1251 | 0.9029 | 0.8864 | 0.9664 | 0.0547 |
| MIR383     | 0.9483 | 1.0288 | 1.0057 | 0.8829 | 0.9664 | 0.0326 |
| LOC642588  | 0.9201 | 1.0494 | 1.0351 | 0.8612 | 0.9664 | 0.0455 |
| DEFB119    | 0.9244 | 1.1142 | 0.9315 | 0.8958 | 0.9665 | 0.0498 |
| C21orf90   | 0.8409 | 1.1127 | 0.9244 | 0.9877 | 0.9665 | 0.0573 |
| LOC729179  | 0.8041 | 1.1659 | 1.0347 | 0.8611 | 0.9665 | 0.0826 |
| LGALS7B    | 0.9805 | 1.0740 | 0.9073 | 0.9039 | 0.9665 | 0.0400 |
| LOC1001283 | 0.9521 | 1.0870 | 1.0083 | 0.8184 | 0.9665 | 0.0566 |
| IL1F7      | 0.9353 | 0.9633 | 0.9801 | 0.9872 | 0.9665 | 0.0115 |
| MIR27A     | 1.0518 | 0.9655 | 1.0133 | 0.8353 | 0.9665 | 0.0472 |
| OR4B1      | 0.9147 | 1.0500 | 0.9924 | 0.9088 | 0.9665 | 0.0337 |

|            |        |        |        |        |        |        |
|------------|--------|--------|--------|--------|--------|--------|
| ZPBP       | 0.9019 | 1.0280 | 1.0112 | 0.9248 | 0.9665 | 0.0312 |
| LOC644362  | 0.9950 | 0.9917 | 1.0063 | 0.8728 | 0.9665 | 0.0314 |
| GOLGA8E    | 0.9038 | 1.0635 | 0.9835 | 0.9151 | 0.9665 | 0.0368 |
| LOC652808  | 0.8588 | 1.1048 | 0.9924 | 0.9099 | 0.9665 | 0.0537 |
| TCF23      | 0.8730 | 1.1365 | 1.0358 | 0.8207 | 0.9665 | 0.0729 |
| LOC1001331 | 0.9181 | 0.9246 | 1.1042 | 0.9191 | 0.9665 | 0.0459 |
| ZNF92      | 0.9183 | 1.0933 | 0.9720 | 0.8823 | 0.9665 | 0.0461 |
| SIAH2      | 0.9003 | 1.3064 | 0.9217 | 0.7376 | 0.9665 | 0.1205 |
| BBS5       | 0.9290 | 1.0148 | 0.9082 | 1.0139 | 0.9665 | 0.0280 |
| OR52E4     | 0.9636 | 0.9442 | 1.0299 | 0.9283 | 0.9665 | 0.0223 |
| LOC1001283 | 0.9499 | 1.0620 | 1.0002 | 0.8539 | 0.9665 | 0.0440 |
| CRNN       | 0.8999 | 1.1316 | 0.9829 | 0.8517 | 0.9665 | 0.0613 |
| AKAP2      | 0.8863 | 1.0916 | 1.0000 | 0.8882 | 0.9665 | 0.0494 |
| BAHD1      | 0.8634 | 1.0613 | 1.0148 | 0.9266 | 0.9665 | 0.0443 |
| RYR2       | 0.9352 | 1.0631 | 0.9904 | 0.8773 | 0.9665 | 0.0396 |
| LOC1001298 | 0.8056 | 1.1326 | 1.1426 | 0.7854 | 0.9665 | 0.0989 |
| LOC645177  | 0.8873 | 1.1175 | 0.9914 | 0.8700 | 0.9665 | 0.0570 |
| OR12D2     | 1.0083 | 1.0136 | 0.9997 | 0.8446 | 0.9665 | 0.0408 |
| CXorf65    | 0.8742 | 1.1184 | 0.9882 | 0.8853 | 0.9665 | 0.0568 |
| LCORL      | 0.9220 | 1.0759 | 0.9939 | 0.8743 | 0.9665 | 0.0440 |
| PLA2G10    | 0.9002 | 1.1192 | 0.9431 | 0.9037 | 0.9665 | 0.0518 |
| LOC731431  | 0.8949 | 1.0681 | 1.0410 | 0.8622 | 0.9666 | 0.0515 |
| QARS       | 0.8351 | 1.3483 | 0.9038 | 0.7790 | 0.9666 | 0.1298 |
| DKFZP434A0 | 0.9968 | 0.9853 | 1.0369 | 0.8472 | 0.9666 | 0.0413 |
| LOC146909  | 0.9237 | 1.1289 | 1.0253 | 0.7884 | 0.9666 | 0.0727 |
| LOC646680  | 0.9557 | 0.9299 | 1.0336 | 0.9471 | 0.9666 | 0.0230 |
| FAM186B    | 0.9049 | 1.0321 | 1.0577 | 0.8716 | 0.9666 | 0.0460 |
| SPZ1       | 0.8558 | 1.0938 | 1.0156 | 0.9011 | 0.9666 | 0.0541 |
| STON2      | 0.8800 | 1.0832 | 0.9679 | 0.9353 | 0.9666 | 0.0429 |
| TICAM2     | 0.8753 | 1.1868 | 0.9181 | 0.8862 | 0.9666 | 0.0740 |
| SPDYA      | 0.9609 | 1.0991 | 0.9461 | 0.8602 | 0.9666 | 0.0494 |
| NEK10      | 0.9432 | 1.0734 | 0.9717 | 0.8780 | 0.9666 | 0.0407 |
| DBF4       | 0.9208 | 1.0752 | 1.0697 | 0.8007 | 0.9666 | 0.0659 |
| CIDEC      | 0.8563 | 1.1264 | 0.9734 | 0.9102 | 0.9666 | 0.0584 |
| AWAT2      | 0.9462 | 0.9311 | 0.9915 | 0.9975 | 0.9666 | 0.0165 |
| LOC649167  | 0.9377 | 1.1087 | 0.9658 | 0.8542 | 0.9666 | 0.0530 |
| HEYL       | 1.0338 | 0.9506 | 0.9433 | 0.9388 | 0.9666 | 0.0225 |
| PDE1B      | 0.9200 | 1.0607 | 0.9953 | 0.8905 | 0.9666 | 0.0383 |
| BSND       | 0.9595 | 1.0394 | 0.8994 | 0.9682 | 0.9666 | 0.0287 |
| LOC1001340 | 0.9931 | 1.0300 | 1.0405 | 0.8029 | 0.9666 | 0.0555 |
| OR11G2     | 0.9368 | 1.0057 | 1.0663 | 0.8578 | 0.9666 | 0.0449 |
| C3orf41    | 0.9349 | 1.0121 | 0.9757 | 0.9439 | 0.9666 | 0.0175 |
| LOC646026  | 0.8833 | 1.0218 | 1.0213 | 0.9402 | 0.9666 | 0.0338 |
| LOC1001337 | 0.8738 | 0.9928 | 1.1047 | 0.8953 | 0.9666 | 0.0528 |
| ZZEF1      | 0.8433 | 1.2186 | 0.9757 | 0.8290 | 0.9666 | 0.0902 |
| LOC647285  | 0.7298 | 1.2706 | 1.1981 | 0.6681 | 0.9667 | 0.1558 |

|            |        |        |        |        |        |        |
|------------|--------|--------|--------|--------|--------|--------|
| LOC646748  | 1.0242 | 1.0338 | 0.9693 | 0.8394 | 0.9667 | 0.0447 |
| LOC727901  | 0.9087 | 1.0741 | 0.9076 | 0.9762 | 0.9667 | 0.0392 |
| LOC652906  | 1.0118 | 0.9776 | 0.9429 | 0.9343 | 0.9667 | 0.0177 |
| MIR521-2   | 0.8320 | 1.0608 | 0.9839 | 0.9899 | 0.9667 | 0.0482 |
| SLC4A5     | 0.9245 | 1.0484 | 1.0178 | 0.8760 | 0.9667 | 0.0401 |
| LPIN3      | 0.8211 | 1.2273 | 0.9599 | 0.8583 | 0.9667 | 0.0917 |
| LOC653935  | 0.9352 | 1.0117 | 1.0544 | 0.8654 | 0.9667 | 0.0418 |
| DNASE1L2   | 0.9494 | 1.0624 | 1.0045 | 0.8504 | 0.9667 | 0.0451 |
| CPNE2      | 0.9398 | 0.9267 | 1.1480 | 0.8522 | 0.9667 | 0.0635 |
| LOC729666  | 0.9050 | 1.0513 | 0.9932 | 0.9172 | 0.9667 | 0.0343 |
| COL4A3     | 0.9553 | 1.0187 | 0.9661 | 0.9266 | 0.9667 | 0.0193 |
| LOC653653  | 0.8797 | 1.0486 | 0.9485 | 0.9899 | 0.9667 | 0.0355 |
| LOC343515  | 0.9380 | 1.0674 | 0.9863 | 0.8750 | 0.9667 | 0.0406 |
| LOC644266  | 0.8726 | 1.0586 | 1.0630 | 0.8725 | 0.9667 | 0.0544 |
| LOC1001303 | 0.8955 | 1.1661 | 0.9049 | 0.9002 | 0.9667 | 0.0665 |
| LOC286187  | 0.9853 | 0.9625 | 0.9936 | 0.9253 | 0.9667 | 0.0153 |
| LOC1001306 | 0.9437 | 1.0385 | 0.9587 | 0.9259 | 0.9667 | 0.0249 |
| LOC653337  | 0.9435 | 1.0332 | 1.0321 | 0.8578 | 0.9667 | 0.0419 |
| LOC1001289 | 0.9047 | 1.0268 | 1.0660 | 0.8693 | 0.9667 | 0.0473 |
| LOC652777  | 0.9794 | 0.9955 | 1.0478 | 0.8441 | 0.9667 | 0.0434 |
| RETN       | 1.0333 | 1.0545 | 0.9647 | 0.8143 | 0.9667 | 0.0543 |
| LOC643883  | 0.9275 | 1.0814 | 1.0408 | 0.8170 | 0.9667 | 0.0596 |
| LOC391763  | 0.8710 | 1.0917 | 0.9383 | 0.9658 | 0.9667 | 0.0462 |
| CYGB       | 0.9206 | 1.1126 | 0.9183 | 0.9153 | 0.9667 | 0.0487 |
| TRIM40     | 0.8341 | 1.0839 | 1.0791 | 0.8697 | 0.9667 | 0.0667 |
| LOC653352  | 0.9276 | 1.0148 | 1.0070 | 0.9174 | 0.9667 | 0.0256 |
| LOC1001293 | 0.7653 | 1.2745 | 0.8907 | 0.9364 | 0.9667 | 0.1088 |
| LOC1001281 | 0.8632 | 1.1187 | 1.0861 | 0.7990 | 0.9667 | 0.0797 |
| LOC652003  | 0.9231 | 1.1082 | 1.0572 | 0.7785 | 0.9667 | 0.0739 |
| KRTAP4-5   | 0.8597 | 1.0678 | 1.0469 | 0.8926 | 0.9667 | 0.0529 |
| CALHM1     | 0.9294 | 1.0084 | 1.0661 | 0.8631 | 0.9667 | 0.0445 |
| LOC1001309 | 0.8772 | 1.1233 | 0.9644 | 0.9020 | 0.9667 | 0.0553 |
| WFDC11     | 1.0441 | 0.9829 | 1.0563 | 0.7837 | 0.9667 | 0.0631 |
| MFHAS1     | 0.8234 | 1.2333 | 0.9346 | 0.8757 | 0.9667 | 0.0917 |
| LOC1001308 | 0.9266 | 1.0110 | 1.0410 | 0.8883 | 0.9667 | 0.0356 |
| MIR98      | 1.0225 | 0.9449 | 1.0205 | 0.8791 | 0.9667 | 0.0343 |
| CA5A       | 0.8810 | 1.0867 | 1.0014 | 0.8979 | 0.9667 | 0.0480 |
| C14orf180  | 0.9330 | 1.0551 | 0.9819 | 0.8970 | 0.9668 | 0.0342 |
| LOC375190  | 0.9333 | 1.0513 | 1.0401 | 0.8423 | 0.9668 | 0.0493 |
| LOC731631  | 0.9361 | 1.0539 | 0.9658 | 0.9112 | 0.9668 | 0.0311 |
| ASB11      | 0.9872 | 1.0172 | 1.0005 | 0.8622 | 0.9668 | 0.0354 |
| FAM161A    | 0.7709 | 1.1300 | 0.9781 | 0.9881 | 0.9668 | 0.0739 |
| MIR23B     | 0.7988 | 1.0339 | 1.1413 | 0.8930 | 0.9668 | 0.0756 |
| CRYGA      | 0.8796 | 1.1302 | 0.9890 | 0.8683 | 0.9668 | 0.0609 |
| LOC388327  | 0.9302 | 1.1171 | 0.9538 | 0.8661 | 0.9668 | 0.0534 |
| NACC1      | 0.9030 | 1.1884 | 0.9811 | 0.7946 | 0.9668 | 0.0832 |



|            |        |        |        |        |        |        |
|------------|--------|--------|--------|--------|--------|--------|
| LOC642968  | 0.9222 | 1.0326 | 0.9942 | 0.9181 | 0.9668 | 0.0281 |
| LOC728403  | 0.8736 | 1.1162 | 0.9263 | 0.9511 | 0.9668 | 0.0524 |
| NTN3       | 0.9019 | 1.0646 | 1.0123 | 0.8884 | 0.9668 | 0.0428 |
| MIR192     | 0.8736 | 1.0382 | 1.0060 | 0.9495 | 0.9668 | 0.0361 |
| MEGF6      | 1.0361 | 1.0786 | 0.9846 | 0.7679 | 0.9668 | 0.0690 |
| LOC392364  | 0.9128 | 0.9565 | 1.0587 | 0.9392 | 0.9668 | 0.0319 |
| LOC653766  | 0.9339 | 1.0740 | 0.9921 | 0.8673 | 0.9668 | 0.0439 |
| LOC339862  | 0.9386 | 1.0727 | 0.8930 | 0.9629 | 0.9668 | 0.0382 |
| FLJ30092   | 0.9272 | 1.0534 | 0.9857 | 0.9010 | 0.9668 | 0.0338 |
| INHBE      | 0.9169 | 1.1632 | 0.9242 | 0.8631 | 0.9668 | 0.0669 |
| LRP2BP     | 0.9566 | 1.0620 | 0.9905 | 0.8582 | 0.9668 | 0.0423 |
| EPHB3      | 0.9588 | 1.1551 | 0.8863 | 0.8671 | 0.9668 | 0.0658 |
| INSL3      | 0.9305 | 1.0434 | 0.9808 | 0.9126 | 0.9668 | 0.0293 |
| C10orf37   | 0.9081 | 1.0160 | 1.0326 | 0.9107 | 0.9668 | 0.0333 |
| ACP5       | 0.9401 | 0.9434 | 1.0617 | 0.9222 | 0.9668 | 0.0320 |
| CLEC10A    | 0.9563 | 1.0548 | 0.9663 | 0.8899 | 0.9668 | 0.0339 |
| GAS7       | 0.9411 | 1.0309 | 0.9870 | 0.9084 | 0.9669 | 0.0267 |
| FUNDC2     | 0.9494 | 1.0555 | 1.0118 | 0.8508 | 0.9669 | 0.0444 |
| H2AFB2     | 0.9535 | 1.1146 | 0.9691 | 0.8303 | 0.9669 | 0.0582 |
| C10orf75   | 0.9243 | 1.0395 | 1.0055 | 0.8982 | 0.9669 | 0.0333 |
| MYPOP      | 0.9107 | 1.1261 | 1.0482 | 0.7826 | 0.9669 | 0.0759 |
| OR8G2      | 0.9175 | 1.1400 | 0.8958 | 0.9141 | 0.9669 | 0.0579 |
| C6orf150   | 0.9389 | 1.0906 | 0.9663 | 0.8717 | 0.9669 | 0.0458 |
| LOC652438  | 0.8973 | 1.0580 | 1.0218 | 0.8904 | 0.9669 | 0.0428 |
| LRRC37A4   | 0.9638 | 1.1045 | 0.9412 | 0.8580 | 0.9669 | 0.0512 |
| LOC642047  | 0.9121 | 1.0066 | 1.0449 | 0.9039 | 0.9669 | 0.0349 |
| LOC653238  | 0.9458 | 1.0578 | 0.9647 | 0.8992 | 0.9669 | 0.0333 |
| SNORD92    | 0.9754 | 1.0674 | 0.9257 | 0.8991 | 0.9669 | 0.0370 |
| HOMER3     | 0.7861 | 1.2273 | 0.9793 | 0.8749 | 0.9669 | 0.0954 |
| LOC649044  | 0.9130 | 1.1235 | 0.9340 | 0.8972 | 0.9669 | 0.0527 |
| BDNF       | 0.9072 | 1.0952 | 0.9756 | 0.8897 | 0.9669 | 0.0466 |
| DNAJC6     | 0.9511 | 0.9540 | 1.0239 | 0.9386 | 0.9669 | 0.0193 |
| RAB13      | 0.7372 | 1.2419 | 1.0483 | 0.8403 | 0.9669 | 0.1122 |
| LOC727882  | 0.9950 | 0.9885 | 0.9426 | 0.9417 | 0.9669 | 0.0144 |
| LOC654163  | 0.8659 | 1.0911 | 1.0876 | 0.8232 | 0.9669 | 0.0712 |
| PRDM5      | 0.8791 | 1.0800 | 1.0077 | 0.9010 | 0.9669 | 0.0470 |
| LOC1001290 | 0.9235 | 1.0591 | 1.1193 | 0.7659 | 0.9669 | 0.0785 |
| OSR1       | 0.9851 | 1.0869 | 1.0367 | 0.7591 | 0.9669 | 0.0723 |
| PDZRN3     | 0.9343 | 1.0637 | 1.0234 | 0.8464 | 0.9670 | 0.0484 |
| SPRR2E     | 1.0092 | 1.0279 | 0.9549 | 0.8758 | 0.9670 | 0.0341 |
| RPRC1      | 0.9044 | 1.4203 | 0.8833 | 0.6598 | 0.9670 | 0.1609 |
| LOC441728  | 0.9127 | 1.0746 | 0.9682 | 0.9124 | 0.9670 | 0.0382 |
| LOC1001321 | 0.9689 | 1.0808 | 0.9270 | 0.8912 | 0.9670 | 0.0411 |
| SP100      | 0.9179 | 1.0226 | 1.0294 | 0.8980 | 0.9670 | 0.0344 |
| KLC2       | 0.8788 | 1.1966 | 0.9673 | 0.8253 | 0.9670 | 0.0820 |
| LOC646257  | 0.9763 | 1.0399 | 0.9299 | 0.9219 | 0.9670 | 0.0271 |

|            |        |        |        |        |        |        |
|------------|--------|--------|--------|--------|--------|--------|
| LOC388553  | 0.8356 | 1.1197 | 1.0182 | 0.8945 | 0.9670 | 0.0636 |
| SULT4A1    | 0.9286 | 1.0564 | 1.0431 | 0.8400 | 0.9670 | 0.0511 |
| LOC645212  | 0.8572 | 1.2882 | 0.9703 | 0.7523 | 0.9670 | 0.1159 |
| LOC150759  | 0.8394 | 1.0405 | 1.0594 | 0.9287 | 0.9670 | 0.0514 |
| LOC650268  | 0.8458 | 1.2583 | 0.9456 | 0.8184 | 0.9670 | 0.1009 |
| ATP6V0B    | 0.8526 | 1.2416 | 1.1079 | 0.6659 | 0.9670 | 0.1288 |
| LOC1001313 | 0.9381 | 0.9742 | 1.0360 | 0.9198 | 0.9670 | 0.0256 |
| SNORA13    | 0.8545 | 1.1125 | 1.0341 | 0.8670 | 0.9670 | 0.0635 |
| LOC1001303 | 0.9590 | 1.1295 | 0.9830 | 0.7965 | 0.9670 | 0.0682 |
| SULF2      | 0.9205 | 1.0559 | 0.9961 | 0.8955 | 0.9670 | 0.0366 |
| LOC651861  | 0.9141 | 1.0670 | 1.0248 | 0.8622 | 0.9670 | 0.0475 |
| LOC387924  | 0.9717 | 1.0898 | 0.9757 | 0.8309 | 0.9670 | 0.0530 |
| NCRNA00175 | 0.9172 | 1.1046 | 1.0112 | 0.8351 | 0.9670 | 0.0583 |
| TMCO5A     | 0.9896 | 1.0584 | 0.9745 | 0.8456 | 0.9670 | 0.0444 |
| SCGB1D1    | 0.9652 | 1.0262 | 0.9755 | 0.9012 | 0.9670 | 0.0257 |
| LOC1001317 | 0.9116 | 1.1293 | 0.9871 | 0.8402 | 0.9670 | 0.0619 |
| ZEB1       | 0.9608 | 1.0577 | 0.9347 | 0.9150 | 0.9671 | 0.0316 |
| COG7       | 0.9114 | 1.1758 | 1.0064 | 0.7746 | 0.9671 | 0.0843 |
| LOC1001288 | 0.7942 | 1.4123 | 0.9235 | 0.7383 | 0.9671 | 0.1534 |
| LOC643962  | 0.9552 | 1.0598 | 0.9895 | 0.8638 | 0.9671 | 0.0407 |
| IL18RAP    | 0.8503 | 1.0595 | 1.0449 | 0.9137 | 0.9671 | 0.0509 |
| SNORD114-1 | 0.8852 | 1.0926 | 1.0432 | 0.8473 | 0.9671 | 0.0596 |
| C9orf72    | 0.9259 | 1.1521 | 1.0021 | 0.7882 | 0.9671 | 0.0759 |
| GNAO1      | 0.8961 | 1.0122 | 1.0703 | 0.8897 | 0.9671 | 0.0445 |
| C6orf79    | 0.9940 | 1.0105 | 0.9027 | 0.9611 | 0.9671 | 0.0238 |
| LOC442251  | 0.9974 | 0.9435 | 1.0253 | 0.9021 | 0.9671 | 0.0275 |
| LOC730456  | 0.9202 | 1.1062 | 1.0180 | 0.8240 | 0.9671 | 0.0610 |
| LOC644280  | 0.9375 | 1.0772 | 1.0107 | 0.8429 | 0.9671 | 0.0503 |
| COG5       | 0.8983 | 1.1503 | 1.0169 | 0.8029 | 0.9671 | 0.0751 |
| WBP5       | 0.8007 | 1.4130 | 0.8855 | 0.7693 | 0.9671 | 0.1506 |
| RAB38      | 0.9325 | 1.1430 | 0.9622 | 0.8308 | 0.9671 | 0.0650 |
| KRTAP10-12 | 0.7344 | 1.2177 | 1.0689 | 0.8474 | 0.9671 | 0.1087 |
| LOC347475  | 0.8845 | 1.0767 | 0.9530 | 0.9543 | 0.9671 | 0.0400 |
| OR52K2     | 0.8599 | 1.0635 | 1.0174 | 0.9277 | 0.9671 | 0.0455 |
| SNORD78    | 0.8818 | 1.0859 | 0.9874 | 0.9134 | 0.9671 | 0.0454 |
| GALNT11    | 0.8699 | 1.3463 | 0.8996 | 0.7527 | 0.9671 | 0.1303 |
| CAPN8      | 0.8852 | 1.0324 | 1.0131 | 0.9378 | 0.9671 | 0.0341 |
| TMEM150B   | 0.8691 | 1.1061 | 1.0017 | 0.8916 | 0.9671 | 0.0546 |
| DGCR6      | 0.7867 | 1.3359 | 1.0228 | 0.7230 | 0.9671 | 0.1388 |
| SYTL4      | 0.9460 | 1.1302 | 1.0076 | 0.7847 | 0.9671 | 0.0718 |
| LOC285500  | 0.8802 | 1.0232 | 1.0676 | 0.8976 | 0.9671 | 0.0462 |
| ITM2A      | 0.8749 | 1.0837 | 1.0013 | 0.9086 | 0.9671 | 0.0471 |
| ADAMTS16   | 0.8976 | 1.0472 | 0.9813 | 0.9425 | 0.9671 | 0.0317 |
| LOC1001303 | 0.8809 | 1.0483 | 1.0333 | 0.9061 | 0.9671 | 0.0430 |
| TRERF1     | 0.8723 | 1.1504 | 0.9778 | 0.8681 | 0.9671 | 0.0661 |
| C3orf62    | 0.8792 | 1.1564 | 1.0346 | 0.7984 | 0.9671 | 0.0799 |

|            |        |        |        |        |        |        |
|------------|--------|--------|--------|--------|--------|--------|
| LOC440687  | 1.0036 | 0.9979 | 0.9675 | 0.8996 | 0.9671 | 0.0239 |
| PSMD7      | 0.7720 | 1.3139 | 1.0057 | 0.7770 | 0.9671 | 0.1278 |
| LOC1001304 | 0.8967 | 1.0512 | 1.0075 | 0.9132 | 0.9671 | 0.0372 |
| LOC1001331 | 0.7764 | 1.1715 | 1.0591 | 0.8616 | 0.9672 | 0.0903 |
| GPR50      | 0.9225 | 0.9714 | 1.0107 | 0.9640 | 0.9672 | 0.0181 |
| LOC647585  | 0.9524 | 1.0695 | 0.9089 | 0.9378 | 0.9672 | 0.0353 |
| KIF1B      | 0.8693 | 1.3204 | 0.9214 | 0.7576 | 0.9672 | 0.1226 |
| KRT222     | 0.8698 | 1.0643 | 1.0984 | 0.8362 | 0.9672 | 0.0666 |
| KCNE3      | 0.9281 | 1.1454 | 1.0014 | 0.7939 | 0.9672 | 0.0733 |
| SYNJ2      | 0.8774 | 1.0010 | 0.9806 | 1.0097 | 0.9672 | 0.0305 |
| BRCA2      | 0.8848 | 1.0916 | 1.0751 | 0.8173 | 0.9672 | 0.0685 |
| LOC728760  | 0.8855 | 1.0041 | 1.0231 | 0.9560 | 0.9672 | 0.0307 |
| TMEM151    | 0.8636 | 1.2435 | 0.9712 | 0.7904 | 0.9672 | 0.0993 |
| NGLY1      | 0.9095 | 1.1727 | 1.1172 | 0.6694 | 0.9672 | 0.1143 |
| C12orf26   | 0.9092 | 1.1100 | 1.0226 | 0.8271 | 0.9672 | 0.0622 |
| LOC1001343 | 0.8416 | 1.0641 | 1.0163 | 0.9469 | 0.9672 | 0.0483 |
| MIR302A    | 0.9323 | 1.1631 | 0.8682 | 0.9053 | 0.9672 | 0.0666 |
| ZNF37A     | 0.8566 | 1.1753 | 0.9670 | 0.8700 | 0.9672 | 0.0736 |
| LOC283398  | 0.8944 | 1.0108 | 1.0508 | 0.9128 | 0.9672 | 0.0378 |
| KCNK10     | 0.9267 | 1.0707 | 1.0118 | 0.8597 | 0.9672 | 0.0465 |
| LOC1001287 | 0.8345 | 1.0757 | 1.0310 | 0.9278 | 0.9672 | 0.0540 |
| SIM2       | 0.8916 | 1.1879 | 0.9378 | 0.8517 | 0.9672 | 0.0756 |
| LOC729269  | 0.8806 | 1.1150 | 0.8952 | 0.9781 | 0.9672 | 0.0537 |
| TRAF3      | 0.8619 | 1.0657 | 1.0159 | 0.9254 | 0.9672 | 0.0456 |
| LOC644038  | 1.0189 | 1.0152 | 0.9694 | 0.8655 | 0.9672 | 0.0357 |
| POMT2      | 0.9369 | 1.2684 | 0.8189 | 0.8448 | 0.9672 | 0.1035 |
| DUSP5P     | 0.9548 | 1.1482 | 0.8986 | 0.8674 | 0.9672 | 0.0630 |
| LOC1001280 | 0.7980 | 1.1083 | 1.2135 | 0.7493 | 0.9672 | 0.1143 |
| LOC645971  | 0.9539 | 1.1003 | 0.9528 | 0.8620 | 0.9673 | 0.0493 |
| LOC730978  | 0.9334 | 1.0901 | 0.9848 | 0.8608 | 0.9673 | 0.0482 |
| PRG2       | 0.9126 | 0.9984 | 0.9370 | 1.0211 | 0.9673 | 0.0255 |
| FUK        | 1.0075 | 1.2625 | 0.8342 | 0.7648 | 0.9673 | 0.1109 |
| CDH22      | 0.8922 | 1.1528 | 0.9694 | 0.8548 | 0.9673 | 0.0663 |
| LOC647747  | 1.0231 | 1.1441 | 1.0194 | 0.6826 | 0.9673 | 0.0992 |
| VCAN       | 1.0033 | 0.9743 | 0.9563 | 0.9354 | 0.9673 | 0.0144 |
| LOC653853  | 0.9918 | 0.9978 | 0.9965 | 0.8831 | 0.9673 | 0.0281 |
| ZNF610     | 1.0357 | 0.9487 | 0.9962 | 0.8886 | 0.9673 | 0.0317 |
| GYPC       | 0.9001 | 1.0686 | 0.9808 | 0.9198 | 0.9673 | 0.0379 |
| LOC645520  | 0.8612 | 1.0421 | 0.9759 | 0.9900 | 0.9673 | 0.0381 |
| PMCH       | 0.7655 | 1.1366 | 1.0767 | 0.8905 | 0.9673 | 0.0853 |
| LOC1001317 | 1.0068 | 1.0924 | 0.9955 | 0.7746 | 0.9673 | 0.0678 |
| KIAA1033   | 0.9400 | 1.0695 | 1.0398 | 0.8200 | 0.9673 | 0.0564 |
| LOC441812  | 0.9814 | 1.0432 | 0.8614 | 0.9833 | 0.9673 | 0.0381 |
| LOC1001315 | 0.9241 | 1.0034 | 1.0137 | 0.9281 | 0.9673 | 0.0239 |
| ZCCHC16    | 0.8804 | 1.0431 | 0.9950 | 0.9509 | 0.9673 | 0.0346 |
| CCDC72     | 0.9359 | 1.3086 | 0.9017 | 0.7232 | 0.9673 | 0.1229 |

|            |        |        |        |        |        |        |
|------------|--------|--------|--------|--------|--------|--------|
| CDRT4      | 0.9188 | 1.1817 | 0.9243 | 0.8445 | 0.9673 | 0.0737 |
| KCNF1      | 0.9021 | 1.0385 | 1.1056 | 0.8233 | 0.9674 | 0.0640 |
| LOC641972  | 1.1167 | 1.1011 | 0.9266 | 0.7252 | 0.9674 | 0.0915 |
| HAR1A      | 0.9448 | 1.0991 | 0.8538 | 0.9719 | 0.9674 | 0.0506 |
| LOC149086  | 0.9458 | 1.0851 | 0.9062 | 0.9324 | 0.9674 | 0.0401 |
| ZNF793     | 0.9422 | 1.0805 | 1.1020 | 0.7448 | 0.9674 | 0.0822 |
| LOC647535  | 0.8806 | 1.0077 | 1.0069 | 0.9743 | 0.9674 | 0.0299 |
| LOC199882  | 0.9620 | 1.0639 | 1.0092 | 0.8343 | 0.9674 | 0.0490 |
| LOC647971  | 0.9414 | 1.0203 | 1.1334 | 0.7744 | 0.9674 | 0.0754 |
| BRIP1      | 0.9287 | 1.0327 | 0.9309 | 0.9772 | 0.9674 | 0.0245 |
| LOC730015  | 0.8519 | 1.0839 | 1.1045 | 0.8292 | 0.9674 | 0.0735 |
| LOC651741  | 0.8069 | 1.1052 | 1.0510 | 0.9065 | 0.9674 | 0.0680 |
| LOC652226  | 0.8612 | 1.0276 | 1.0848 | 0.8959 | 0.9674 | 0.0531 |
| LOC730130  | 0.9217 | 0.9665 | 1.0306 | 0.9509 | 0.9674 | 0.0230 |
| LOC646717  | 0.9383 | 1.0609 | 0.8876 | 0.9828 | 0.9674 | 0.0368 |
| FLJ43093   | 0.8994 | 1.0781 | 1.0593 | 0.8328 | 0.9674 | 0.0602 |
| ERCC-00074 | 0.9459 | 1.0902 | 0.9599 | 0.8737 | 0.9674 | 0.0451 |
| LOC653380  | 0.8987 | 1.0362 | 1.0324 | 0.9023 | 0.9674 | 0.0386 |
| LOC653695  | 0.8930 | 1.2168 | 0.9235 | 0.8362 | 0.9674 | 0.0851 |
| LOC643680  | 0.9462 | 0.9953 | 0.9308 | 0.9974 | 0.9674 | 0.0170 |
| MEX3C      | 0.7699 | 1.2564 | 1.1098 | 0.7336 | 0.9674 | 0.1283 |
| JMJD1A     | 1.0770 | 1.0136 | 1.0365 | 0.7424 | 0.9674 | 0.0761 |
| LOC728111  | 0.9351 | 1.0167 | 1.0808 | 0.8370 | 0.9674 | 0.0527 |
| TBX18      | 0.9484 | 1.0656 | 0.9847 | 0.8710 | 0.9674 | 0.0404 |
| FLJ00312   | 0.8872 | 1.0824 | 1.0079 | 0.8922 | 0.9674 | 0.0474 |
| LOC1001301 | 0.7634 | 1.2255 | 1.0380 | 0.8427 | 0.9674 | 0.1036 |
| NDUFA7     | 0.7844 | 1.3570 | 0.9441 | 0.7842 | 0.9674 | 0.1352 |
| MGC70870   | 0.9696 | 1.0697 | 0.9606 | 0.8697 | 0.9674 | 0.0409 |
| LOC728707  | 0.8747 | 1.1262 | 0.9706 | 0.8982 | 0.9674 | 0.0567 |
| LOC645557  | 0.8587 | 1.0867 | 0.9963 | 0.9280 | 0.9674 | 0.0487 |
| POLR2J3    | 0.7844 | 1.1457 | 1.2174 | 0.7222 | 0.9674 | 0.1251 |
| LOC647520  | 0.8964 | 1.1722 | 0.9231 | 0.8780 | 0.9674 | 0.0689 |
| LOC729897  | 0.8606 | 0.9880 | 1.1092 | 0.9119 | 0.9674 | 0.0540 |
| FAM22G     | 0.9503 | 1.0268 | 1.0028 | 0.8900 | 0.9674 | 0.0304 |
| LOC653436  | 0.9323 | 1.1832 | 0.9502 | 0.8041 | 0.9674 | 0.0789 |
| RASAL2     | 0.8967 | 1.0813 | 0.9944 | 0.8973 | 0.9674 | 0.0444 |
| SPINK9     | 0.9476 | 1.0631 | 1.0038 | 0.8553 | 0.9675 | 0.0442 |
| PRLH       | 0.9974 | 1.0323 | 0.9519 | 0.8883 | 0.9675 | 0.0311 |
| LOC652608  | 0.8516 | 1.0861 | 1.1584 | 0.7738 | 0.9675 | 0.0919 |
| GFRAL      | 0.8935 | 1.1006 | 0.9915 | 0.8842 | 0.9675 | 0.0506 |
| CCDC70     | 0.8589 | 0.9508 | 1.0868 | 0.9734 | 0.9675 | 0.0468 |
| HPR        | 0.9387 | 1.1896 | 0.9676 | 0.7740 | 0.9675 | 0.0854 |
| LOC652696  | 0.8456 | 1.0494 | 1.0203 | 0.9546 | 0.9675 | 0.0452 |
| WDR63      | 0.9430 | 1.0809 | 0.9664 | 0.8796 | 0.9675 | 0.0420 |
| C10orf91   | 0.9343 | 1.0304 | 0.9740 | 0.9313 | 0.9675 | 0.0231 |
| LOC729444  | 0.8978 | 1.0189 | 1.0468 | 0.9065 | 0.9675 | 0.0382 |

|            |        |        |        |        |        |        |
|------------|--------|--------|--------|--------|--------|--------|
| RNF17      | 0.9364 | 1.0426 | 1.0104 | 0.8805 | 0.9675 | 0.0365 |
| MIR1200    | 0.9185 | 1.0772 | 0.9134 | 0.9609 | 0.9675 | 0.0381 |
| VWCE       | 0.8519 | 1.0809 | 0.9594 | 0.9778 | 0.9675 | 0.0469 |
| LOC644201  | 0.9902 | 1.0920 | 0.9388 | 0.8490 | 0.9675 | 0.0507 |
| FAM168A    | 1.0298 | 0.9610 | 0.9995 | 0.8797 | 0.9675 | 0.0325 |
| LOC643482  | 0.8988 | 1.1423 | 0.9521 | 0.8768 | 0.9675 | 0.0604 |
| LOC1001321 | 0.8139 | 1.2010 | 0.9762 | 0.8788 | 0.9675 | 0.0847 |
| LOC1001328 | 1.0639 | 0.9643 | 0.9091 | 0.9328 | 0.9675 | 0.0340 |
| LOC1001302 | 0.9645 | 1.0088 | 0.9974 | 0.8993 | 0.9675 | 0.0246 |
| LOC731228  | 0.9289 | 1.0676 | 0.9985 | 0.8751 | 0.9675 | 0.0418 |
| ERCC-00131 | 0.8574 | 1.0152 | 1.0636 | 0.9338 | 0.9675 | 0.0454 |
| LOC729096  | 0.8644 | 1.0374 | 0.9322 | 1.0361 | 0.9675 | 0.0423 |
| LAT        | 0.9038 | 1.0846 | 0.9771 | 0.9046 | 0.9675 | 0.0426 |
| TXNDC3     | 0.9306 | 0.9150 | 1.1272 | 0.8973 | 0.9675 | 0.0537 |
| NAV2       | 0.8627 | 1.0927 | 1.0524 | 0.8624 | 0.9675 | 0.0612 |
| LOC1001346 | 0.8923 | 1.0431 | 1.0612 | 0.8735 | 0.9675 | 0.0491 |
| TF         | 0.8719 | 1.1562 | 0.9369 | 0.9052 | 0.9675 | 0.0643 |
| OR13A1     | 0.9033 | 0.9553 | 1.0517 | 0.9598 | 0.9675 | 0.0308 |
| CXorf27    | 0.9158 | 1.0260 | 1.0070 | 0.9214 | 0.9675 | 0.0285 |
| OR1N1      | 1.0315 | 0.9583 | 0.9958 | 0.8846 | 0.9675 | 0.0314 |
| HYPB       | 0.8897 | 0.9973 | 1.0206 | 0.9626 | 0.9676 | 0.0286 |
| BREA2      | 0.9129 | 1.0655 | 1.0250 | 0.8668 | 0.9676 | 0.0466 |
| SLC39A5    | 0.9001 | 1.0315 | 1.0716 | 0.8671 | 0.9676 | 0.0496 |
| LOC728904  | 0.8656 | 1.0563 | 0.9197 | 1.0286 | 0.9676 | 0.0450 |
| LOC1001339 | 0.7900 | 1.2066 | 1.0193 | 0.8544 | 0.9676 | 0.0932 |
| CYP2W1     | 0.8752 | 1.0308 | 1.0404 | 0.9239 | 0.9676 | 0.0406 |
| LOC645930  | 0.9858 | 1.0289 | 1.0210 | 0.8346 | 0.9676 | 0.0453 |
| LOC652341  | 1.0246 | 0.9735 | 0.9567 | 0.9155 | 0.9676 | 0.0226 |
| DCDC5      | 0.8794 | 1.0712 | 1.0239 | 0.8959 | 0.9676 | 0.0473 |
| SPIC       | 0.9897 | 1.0538 | 0.9491 | 0.8778 | 0.9676 | 0.0369 |
| LOC652344  | 0.9766 | 1.0512 | 0.9323 | 0.9103 | 0.9676 | 0.0311 |
| LOC651552  | 0.9962 | 1.0574 | 0.9780 | 0.8388 | 0.9676 | 0.0462 |
| LOC728361  | 0.9030 | 1.0367 | 1.0136 | 0.9172 | 0.9676 | 0.0337 |
| SLMAP      | 0.8787 | 1.2963 | 0.9594 | 0.7360 | 0.9676 | 0.1189 |
| LOC152845  | 0.8920 | 1.0383 | 1.0268 | 0.9134 | 0.9676 | 0.0378 |
| ZFP1       | 0.8957 | 1.1189 | 1.0214 | 0.8344 | 0.9676 | 0.0637 |
| LGI3       | 0.9739 | 1.0296 | 0.9135 | 0.9535 | 0.9676 | 0.0242 |
| LOC1001281 | 0.9863 | 0.9344 | 1.1164 | 0.8335 | 0.9676 | 0.0589 |
| NLF2       | 0.9901 | 1.0123 | 0.9830 | 0.8852 | 0.9676 | 0.0282 |
| LOC642950  | 0.9788 | 1.0850 | 0.9324 | 0.8743 | 0.9676 | 0.0446 |
| CACNG7     | 0.9294 | 1.0965 | 0.9774 | 0.8673 | 0.9676 | 0.0485 |
| FLJ16734   | 0.9285 | 1.1180 | 0.9962 | 0.8279 | 0.9676 | 0.0609 |
| PIK3R5     | 0.8560 | 1.1694 | 0.9969 | 0.8482 | 0.9676 | 0.0754 |
| LOC642655  | 1.1763 | 0.8756 | 0.9472 | 0.8714 | 0.9677 | 0.0717 |
| LOC653303  | 1.0042 | 0.9764 | 1.0463 | 0.8438 | 0.9677 | 0.0437 |
| THSD7A     | 0.8705 | 1.0307 | 1.0744 | 0.8950 | 0.9677 | 0.0501 |

|            |        |        |        |        |        |        |
|------------|--------|--------|--------|--------|--------|--------|
| LOC220729  | 0.8967 | 1.0291 | 1.0735 | 0.8714 | 0.9677 | 0.0494 |
| EPC2       | 0.9812 | 1.0913 | 0.9091 | 0.8891 | 0.9677 | 0.0457 |
| MYO5B      | 0.9986 | 1.0044 | 1.0566 | 0.8110 | 0.9677 | 0.0538 |
| TRAPPC6B   | 0.9284 | 1.1037 | 1.1078 | 0.7307 | 0.9677 | 0.0894 |
| LOC641743  | 0.8760 | 1.0055 | 1.0954 | 0.8938 | 0.9677 | 0.0513 |
| LOC643040  | 0.9407 | 1.0314 | 1.0235 | 0.8750 | 0.9677 | 0.0371 |
| MLXIPL     | 0.8671 | 1.2038 | 0.9427 | 0.8570 | 0.9677 | 0.0810 |
| CABP5      | 0.9812 | 1.0133 | 1.0821 | 0.7941 | 0.9677 | 0.0616 |
| MS4A6A     | 0.8988 | 1.0593 | 1.0086 | 0.9040 | 0.9677 | 0.0397 |
| LOC1001318 | 0.9192 | 1.0715 | 1.0305 | 0.8495 | 0.9677 | 0.0509 |
| CROCCL1    | 0.9618 | 1.0204 | 0.9926 | 0.8959 | 0.9677 | 0.0268 |
| FCRL2      | 0.9187 | 1.0987 | 0.9740 | 0.8792 | 0.9677 | 0.0478 |
| LOC389768  | 0.8695 | 1.0804 | 1.0480 | 0.8729 | 0.9677 | 0.0561 |
| MIR149     | 0.8568 | 1.0475 | 1.0436 | 0.9227 | 0.9677 | 0.0469 |
| LOC728285  | 0.9361 | 1.0363 | 0.9939 | 0.9044 | 0.9677 | 0.0294 |
| ARL15      | 0.7899 | 1.2937 | 1.0208 | 0.7664 | 0.9677 | 0.1229 |
| PDZK1IP1   | 1.0612 | 0.9644 | 1.0279 | 0.8172 | 0.9677 | 0.0540 |
| OTX1       | 0.8585 | 1.0843 | 1.0253 | 0.9026 | 0.9677 | 0.0525 |
| LOC642245  | 1.0891 | 0.9500 | 1.0013 | 0.8304 | 0.9677 | 0.0540 |
| CHST9      | 0.9772 | 0.9931 | 1.0412 | 0.8594 | 0.9677 | 0.0386 |
| COX6A2     | 0.9861 | 1.0447 | 0.9833 | 0.8567 | 0.9677 | 0.0396 |
| DZIP1      | 0.9324 | 1.0044 | 1.0445 | 0.8895 | 0.9677 | 0.0349 |
| THUMPD3    | 0.9508 | 1.1019 | 1.0848 | 0.7335 | 0.9677 | 0.0851 |
| LOC554175  | 0.9450 | 1.0979 | 0.9323 | 0.8956 | 0.9677 | 0.0446 |
| LOC652317  | 0.8354 | 1.1000 | 1.0522 | 0.8833 | 0.9677 | 0.0641 |
| ZNF530     | 0.8748 | 1.1007 | 0.9272 | 0.9683 | 0.9677 | 0.0483 |
| LOC728748  | 0.8433 | 1.2002 | 0.9610 | 0.8665 | 0.9677 | 0.0816 |
| LOC1001316 | 0.9082 | 1.0675 | 1.0375 | 0.8577 | 0.9677 | 0.0504 |
| LOC647935  | 0.9081 | 0.9915 | 0.8901 | 1.0813 | 0.9677 | 0.0438 |
| INGX       | 0.8902 | 1.0844 | 0.9933 | 0.9030 | 0.9677 | 0.0452 |
| TDGF1      | 0.9163 | 0.9815 | 1.0904 | 0.8828 | 0.9678 | 0.0457 |
| HOXA3      | 0.9352 | 1.0768 | 0.9615 | 0.8975 | 0.9678 | 0.0386 |
| LOC644094  | 0.8882 | 1.0465 | 1.0260 | 0.9103 | 0.9678 | 0.0400 |
| ZNF780B    | 0.9211 | 1.0479 | 0.9857 | 0.9163 | 0.9678 | 0.0311 |
| LOC729744  | 0.9211 | 1.0613 | 1.0447 | 0.8440 | 0.9678 | 0.0518 |
| LOC389102  | 0.8772 | 1.1901 | 0.9088 | 0.8950 | 0.9678 | 0.0744 |
| FLJ39660   | 0.8651 | 1.1344 | 1.0585 | 0.8131 | 0.9678 | 0.0766 |
| LOC646282  | 0.9413 | 1.0666 | 1.0091 | 0.8541 | 0.9678 | 0.0457 |
| LOC651158  | 0.8513 | 0.9798 | 1.1126 | 0.9274 | 0.9678 | 0.0550 |
| CNTNAP5    | 0.9265 | 1.0380 | 0.9723 | 0.9343 | 0.9678 | 0.0255 |
| IFNA5      | 1.0297 | 0.9919 | 0.9657 | 0.8839 | 0.9678 | 0.0309 |
| C6orf124   | 0.9605 | 1.0575 | 1.0317 | 0.8215 | 0.9678 | 0.0529 |
| LOC641810  | 0.8957 | 1.0329 | 1.0581 | 0.8844 | 0.9678 | 0.0452 |
| LOC137107  | 0.9822 | 1.0127 | 1.0699 | 0.8064 | 0.9678 | 0.0568 |
| LOC732402  | 0.9961 | 1.0110 | 0.9417 | 0.9224 | 0.9678 | 0.0212 |
| DEGS2      | 0.8705 | 1.0807 | 0.9764 | 0.9436 | 0.9678 | 0.0437 |

|            |        |        |        |        |        |        |
|------------|--------|--------|--------|--------|--------|--------|
| LOC642083  | 0.9094 | 1.0291 | 1.1088 | 0.8239 | 0.9678 | 0.0631 |
| PRAMEF14   | 0.9205 | 1.1082 | 1.0046 | 0.8380 | 0.9678 | 0.0578 |
| TRY1       | 0.9455 | 1.1001 | 1.0313 | 0.7944 | 0.9678 | 0.0659 |
| LOC645101  | 0.9252 | 1.0928 | 0.9746 | 0.8787 | 0.9678 | 0.0460 |
| LOC729476  | 0.9047 | 1.0217 | 0.9595 | 0.9854 | 0.9678 | 0.0246 |
| LOC645313  | 0.8215 | 1.0842 | 1.1080 | 0.8576 | 0.9678 | 0.0746 |
| PCDHAC2    | 0.9167 | 0.9864 | 1.0394 | 0.9289 | 0.9678 | 0.0283 |
| LOC649542  | 0.9053 | 1.0721 | 0.9425 | 0.9515 | 0.9678 | 0.0362 |
| LOC649937  | 0.9453 | 1.0648 | 0.9722 | 0.8891 | 0.9678 | 0.0367 |
| LOC645254  | 0.9248 | 0.9495 | 1.0231 | 0.9741 | 0.9679 | 0.0210 |
| LOC389662  | 0.7720 | 1.1124 | 1.1592 | 0.8278 | 0.9679 | 0.0981 |
| SERTAD4    | 0.9229 | 1.0373 | 0.9714 | 0.9399 | 0.9679 | 0.0252 |
| GLIPR2     | 0.8770 | 1.3933 | 0.9048 | 0.6964 | 0.9679 | 0.1491 |
| LOC641693  | 0.8361 | 1.0846 | 0.9965 | 0.9542 | 0.9679 | 0.0516 |
| FOXL2      | 0.8941 | 1.0146 | 0.9797 | 0.9830 | 0.9679 | 0.0258 |
| LOC1001299 | 0.8977 | 1.0673 | 0.9621 | 0.9444 | 0.9679 | 0.0358 |
| KIAA1660   | 0.9118 | 1.0768 | 0.9223 | 0.9607 | 0.9679 | 0.0378 |
| TIGD3      | 0.9535 | 1.1471 | 0.9734 | 0.7975 | 0.9679 | 0.0715 |
| KLHDC9     | 0.9693 | 1.2588 | 0.8664 | 0.7769 | 0.9679 | 0.1047 |
| KLRC3      | 0.8971 | 1.0653 | 1.0248 | 0.8844 | 0.9679 | 0.0454 |
| CXorf18    | 0.8847 | 1.0115 | 1.0607 | 0.9146 | 0.9679 | 0.0411 |
| C16orf86   | 1.0348 | 1.0053 | 0.9814 | 0.8500 | 0.9679 | 0.0408 |
| PDE4D      | 0.9172 | 1.2391 | 0.9450 | 0.7703 | 0.9679 | 0.0982 |
| LOC646452  | 0.9772 | 1.0692 | 0.9681 | 0.8571 | 0.9679 | 0.0434 |
| LOC642325  | 1.0278 | 1.0744 | 0.9855 | 0.7839 | 0.9679 | 0.0640 |
| ELAVL4     | 0.9578 | 1.0572 | 0.9003 | 0.9563 | 0.9679 | 0.0326 |
| AOX1       | 0.9782 | 1.0109 | 0.9837 | 0.8988 | 0.9679 | 0.0241 |
| SNORD24    | 1.0110 | 1.0313 | 0.9270 | 0.9023 | 0.9679 | 0.0314 |
| LY6G5B     | 0.9857 | 1.0074 | 0.9897 | 0.8887 | 0.9679 | 0.0268 |
| OR2W1      | 0.9061 | 1.1270 | 0.9342 | 0.9043 | 0.9679 | 0.0535 |
| LOC729568  | 0.9363 | 1.0139 | 0.9975 | 0.9239 | 0.9679 | 0.0222 |
| MGC16291   | 1.0248 | 1.1227 | 0.9059 | 0.8183 | 0.9679 | 0.0667 |
| CASP10     | 0.9553 | 1.0634 | 0.9627 | 0.8903 | 0.9679 | 0.0357 |
| LOC645679  | 0.8918 | 1.1069 | 0.9641 | 0.9089 | 0.9679 | 0.0488 |
| LOC441228  | 0.8322 | 1.1129 | 0.9754 | 0.9513 | 0.9679 | 0.0576 |
| SNORD19    | 0.9444 | 0.9773 | 1.0095 | 0.9406 | 0.9679 | 0.0161 |
| LOC1001288 | 0.8957 | 1.0397 | 0.9916 | 0.9447 | 0.9679 | 0.0309 |
| MIR331     | 0.8279 | 0.9815 | 1.0733 | 0.9891 | 0.9680 | 0.0511 |
| APOBEC3D   | 0.9508 | 1.0789 | 1.0029 | 0.8393 | 0.9680 | 0.0503 |
| LOC647856  | 0.7298 | 1.2687 | 1.2137 | 0.6596 | 0.9680 | 0.1588 |
| LOC1001330 | 0.9513 | 1.0022 | 0.9483 | 0.9700 | 0.9680 | 0.0124 |
| RPESP      | 0.9642 | 1.0599 | 0.9388 | 0.9091 | 0.9680 | 0.0326 |
| LOC644686  | 0.8653 | 1.1441 | 0.9751 | 0.8874 | 0.9680 | 0.0633 |
| CRSP2      | 0.9221 | 1.0748 | 0.9950 | 0.8800 | 0.9680 | 0.0428 |
| TPCN2      | 0.9515 | 1.1297 | 0.9461 | 0.8446 | 0.9680 | 0.0593 |
| FAM71E2    | 0.9515 | 1.1210 | 0.9245 | 0.8749 | 0.9680 | 0.0534 |

|            |        |        |        |        |        |        |
|------------|--------|--------|--------|--------|--------|--------|
| LOC645116  | 0.8464 | 1.0286 | 1.0505 | 0.9465 | 0.9680 | 0.0463 |
| LOC342900  | 0.9021 | 1.0708 | 1.0214 | 0.8777 | 0.9680 | 0.0465 |
| LOC1001327 | 0.9254 | 0.9396 | 1.1288 | 0.8781 | 0.9680 | 0.0552 |
| IGSF1      | 0.8817 | 1.0727 | 0.9757 | 0.9419 | 0.9680 | 0.0400 |
| LOC730145  | 0.8926 | 1.0305 | 1.0142 | 0.9347 | 0.9680 | 0.0327 |
| LOC653651  | 0.8903 | 1.0155 | 1.0424 | 0.9238 | 0.9680 | 0.0363 |
| GLT8D2     | 0.9055 | 1.0727 | 0.9610 | 0.9328 | 0.9680 | 0.0367 |
| CDK7       | 0.8678 | 1.3614 | 0.9510 | 0.6918 | 0.9680 | 0.1418 |
| PRR20E     | 0.9264 | 0.9931 | 1.0219 | 0.9307 | 0.9680 | 0.0236 |
| SPTLC2     | 0.8649 | 1.1613 | 0.9591 | 0.8867 | 0.9680 | 0.0675 |
| LOC1001279 | 1.0101 | 1.0046 | 1.0250 | 0.8324 | 0.9680 | 0.0454 |
| LOC727872  | 0.9536 | 1.0419 | 1.0117 | 0.8649 | 0.9680 | 0.0390 |
| ATP1A3     | 0.9911 | 1.0858 | 0.9967 | 0.7984 | 0.9680 | 0.0606 |
| CDC42EP1   | 0.8866 | 1.0596 | 1.0174 | 0.9085 | 0.9680 | 0.0418 |
| LOC645325  | 0.8837 | 1.0430 | 0.9636 | 0.9818 | 0.9680 | 0.0328 |
| C9orf3     | 0.9063 | 1.1014 | 1.0070 | 0.8575 | 0.9680 | 0.0543 |
| CEACAM1    | 0.9096 | 1.0493 | 1.0165 | 0.8967 | 0.9680 | 0.0381 |
| LOC645508  | 0.9348 | 1.1664 | 0.8594 | 0.9115 | 0.9680 | 0.0680 |
| LOC1001338 | 0.8537 | 1.2022 | 0.9964 | 0.8200 | 0.9680 | 0.0869 |
| LOC647681  | 0.8929 | 1.1527 | 1.0876 | 0.7390 | 0.9681 | 0.0942 |
| LOC1001319 | 0.8390 | 1.1052 | 0.9595 | 0.9686 | 0.9681 | 0.0544 |
| UBE2Z      | 0.8716 | 1.3751 | 0.8685 | 0.7570 | 0.9681 | 0.1383 |
| LOC400713  | 0.8955 | 1.1345 | 1.0046 | 0.8378 | 0.9681 | 0.0654 |
| OR9Q1      | 0.9714 | 1.0160 | 0.8946 | 0.9902 | 0.9681 | 0.0261 |
| RAB11B     | 0.9285 | 1.2235 | 0.9367 | 0.7836 | 0.9681 | 0.0921 |
| LOC1001281 | 0.8920 | 1.0557 | 0.9999 | 0.9247 | 0.9681 | 0.0369 |
| LOC649878  | 0.8652 | 0.9865 | 1.0524 | 0.9682 | 0.9681 | 0.0388 |
| LOC1001304 | 0.9295 | 1.0627 | 1.0260 | 0.8542 | 0.9681 | 0.0472 |
| CALCRL     | 0.9598 | 1.0177 | 0.9587 | 0.9362 | 0.9681 | 0.0174 |
| CDY2B      | 1.0117 | 1.0376 | 0.9786 | 0.8446 | 0.9681 | 0.0429 |
| LOC651881  | 0.8833 | 1.1097 | 1.0060 | 0.8734 | 0.9681 | 0.0560 |
| LOC642257  | 0.9567 | 1.0878 | 0.9792 | 0.8487 | 0.9681 | 0.0490 |
| ERCC-00067 | 0.9067 | 1.0944 | 0.9802 | 0.8912 | 0.9681 | 0.0464 |
| PPM2C      | 0.9015 | 1.0664 | 1.0797 | 0.8249 | 0.9681 | 0.0626 |
| UBE2S      | 0.9502 | 1.1497 | 0.9502 | 0.8225 | 0.9681 | 0.0676 |
| FAM18A     | 0.8805 | 1.0086 | 1.1387 | 0.8448 | 0.9681 | 0.0668 |
| FAM18B2    | 0.8025 | 1.1971 | 1.1077 | 0.7653 | 0.9681 | 0.1082 |
| LOC642639  | 0.9262 | 1.0236 | 0.9654 | 0.9573 | 0.9681 | 0.0203 |
| FLJ30679   | 0.8459 | 1.0711 | 1.0431 | 0.9125 | 0.9681 | 0.0534 |
| CCDC61     | 0.9225 | 1.1239 | 0.9500 | 0.8761 | 0.9681 | 0.0541 |
| DUSP13     | 0.8862 | 1.0390 | 1.0517 | 0.8957 | 0.9681 | 0.0447 |
| LOC1001343 | 0.9073 | 0.9808 | 1.0173 | 0.9671 | 0.9681 | 0.0229 |
| LOC647246  | 0.8839 | 1.1462 | 1.0164 | 0.8261 | 0.9681 | 0.0715 |
| KRTAP5-2   | 0.8547 | 1.0094 | 1.1267 | 0.8818 | 0.9681 | 0.0627 |
| OR5B21     | 0.8683 | 1.0529 | 1.0921 | 0.8593 | 0.9682 | 0.0608 |
| MUC1       | 0.8797 | 1.1276 | 0.9621 | 0.9033 | 0.9682 | 0.0559 |



|            |        |        |        |        |        |        |
|------------|--------|--------|--------|--------|--------|--------|
| LOC343705  | 0.9161 | 1.1164 | 0.9794 | 0.8607 | 0.9682 | 0.0551 |
| KIAA1975   | 0.9701 | 1.0279 | 0.8999 | 0.9748 | 0.9682 | 0.0263 |
| FUT9       | 0.9798 | 1.0292 | 0.9356 | 0.9281 | 0.9682 | 0.0233 |
| PTN        | 0.9129 | 1.1245 | 0.8816 | 0.9536 | 0.9682 | 0.0542 |
| LOC1001315 | 0.9001 | 1.1277 | 0.9670 | 0.8779 | 0.9682 | 0.0564 |
| CLEC9A     | 0.9367 | 0.9538 | 0.9764 | 1.0057 | 0.9682 | 0.0149 |
| CAMK4      | 0.9166 | 1.0240 | 1.0221 | 0.9100 | 0.9682 | 0.0317 |
| ADCY8      | 0.9340 | 1.0384 | 1.0723 | 0.8280 | 0.9682 | 0.0552 |
| MGC27348   | 1.0076 | 0.9788 | 0.9587 | 0.9277 | 0.9682 | 0.0168 |
| LOC643175  | 0.9387 | 1.0582 | 1.0358 | 0.8400 | 0.9682 | 0.0500 |
| LOC727910  | 0.8503 | 1.0319 | 1.0644 | 0.9262 | 0.9682 | 0.0491 |
| LOC642731  | 0.9943 | 1.0370 | 0.9749 | 0.8666 | 0.9682 | 0.0363 |
| ACSS3      | 0.9266 | 1.1027 | 0.9555 | 0.8879 | 0.9682 | 0.0469 |
| C9orf29    | 0.8686 | 1.0201 | 1.0443 | 0.9398 | 0.9682 | 0.0400 |
| LOC440181  | 0.8852 | 1.1548 | 1.0145 | 0.8183 | 0.9682 | 0.0743 |
| BGLAP      | 0.8507 | 0.9902 | 1.0471 | 0.9848 | 0.9682 | 0.0416 |
| MIR873     | 0.9215 | 0.9527 | 1.0722 | 0.9264 | 0.9682 | 0.0353 |
| AMBRA1     | 0.8407 | 1.0594 | 1.0182 | 0.9545 | 0.9682 | 0.0477 |
| CLIC6      | 0.8561 | 1.0574 | 1.0607 | 0.8987 | 0.9682 | 0.0532 |
| LOC647275  | 0.9329 | 1.1178 | 0.9774 | 0.8447 | 0.9682 | 0.0570 |
| LOC1001311 | 0.8856 | 1.0931 | 1.0190 | 0.8752 | 0.9682 | 0.0530 |
| LOC1001342 | 0.8945 | 1.0625 | 0.9546 | 0.9613 | 0.9682 | 0.0348 |
| ARAP2      | 0.9100 | 1.0818 | 0.9839 | 0.8973 | 0.9682 | 0.0424 |
| CFI        | 0.9340 | 0.9979 | 1.1362 | 0.8049 | 0.9682 | 0.0689 |
| LOC641912  | 0.9873 | 1.0551 | 1.0701 | 0.7605 | 0.9682 | 0.0716 |
| SNORA47    | 0.9572 | 0.9920 | 0.9877 | 0.9361 | 0.9682 | 0.0132 |
| SKIP       | 0.8591 | 1.1076 | 0.9792 | 0.9272 | 0.9683 | 0.0525 |
| LOC644682  | 0.9543 | 1.0125 | 1.0153 | 0.8909 | 0.9683 | 0.0294 |
| LOC652767  | 0.9429 | 0.9759 | 1.0105 | 0.9438 | 0.9683 | 0.0160 |
| LOC1001315 | 0.9738 | 0.9638 | 0.9954 | 0.9400 | 0.9683 | 0.0115 |
| OR2T5      | 0.9593 | 1.0678 | 0.9524 | 0.8935 | 0.9683 | 0.0363 |
| MIR301B    | 0.9086 | 1.1454 | 0.9499 | 0.8691 | 0.9683 | 0.0613 |
| SNORD79    | 0.9346 | 1.1260 | 0.9931 | 0.8193 | 0.9683 | 0.0638 |
| TSPAN11    | 0.8280 | 1.1587 | 1.0026 | 0.8838 | 0.9683 | 0.0732 |
| MIR937     | 0.9603 | 0.9919 | 0.9586 | 0.9622 | 0.9683 | 0.0079 |
| RUTBC2     | 0.8767 | 0.9971 | 0.9865 | 1.0128 | 0.9683 | 0.0310 |
| APRIN      | 1.0200 | 1.0604 | 0.9987 | 0.7941 | 0.9683 | 0.0595 |
| RPL26L1    | 0.8799 | 1.2409 | 1.0160 | 0.7364 | 0.9683 | 0.1073 |
| FLJ37078   | 0.9049 | 1.1203 | 1.0496 | 0.7984 | 0.9683 | 0.0722 |
| FAM90A9    | 0.9474 | 1.0619 | 1.0048 | 0.8591 | 0.9683 | 0.0433 |
| MGC16121   | 0.8849 | 1.1540 | 0.9433 | 0.8911 | 0.9683 | 0.0633 |
| TJP3       | 1.0533 | 1.1313 | 0.9527 | 0.7360 | 0.9683 | 0.0856 |
| LOC643266  | 0.9948 | 1.0130 | 1.0016 | 0.8639 | 0.9683 | 0.0350 |
| TTC29      | 0.9493 | 1.1419 | 0.9615 | 0.8205 | 0.9683 | 0.0661 |
| MIR516A1   | 0.9163 | 1.0180 | 0.9944 | 0.9445 | 0.9683 | 0.0231 |
| LOC643002  | 0.9121 | 0.9500 | 1.1038 | 0.9073 | 0.9683 | 0.0462 |

|            |        |        |        |        |        |        |
|------------|--------|--------|--------|--------|--------|--------|
| LOC648926  | 0.9340 | 1.1116 | 0.8896 | 0.9380 | 0.9683 | 0.0490 |
| C19orf21   | 0.9407 | 1.1108 | 1.0051 | 0.8166 | 0.9683 | 0.0615 |
| CD200      | 0.9224 | 1.0267 | 1.0003 | 0.9239 | 0.9683 | 0.0266 |
| C7orf58    | 0.9385 | 1.0693 | 1.0074 | 0.8581 | 0.9683 | 0.0454 |
| LOC650103  | 0.9236 | 0.9499 | 1.0234 | 0.9763 | 0.9683 | 0.0213 |
| ILVBL      | 0.8083 | 1.3417 | 0.9623 | 0.7610 | 0.9683 | 0.1317 |
| LOC388161  | 0.9022 | 1.0310 | 0.9829 | 0.9572 | 0.9683 | 0.0268 |
| TREML2P    | 0.8877 | 1.0580 | 0.9754 | 0.9523 | 0.9683 | 0.0352 |
| FLJ44379   | 0.9257 | 1.0646 | 0.9989 | 0.8841 | 0.9683 | 0.0399 |
| PCDH10     | 0.9149 | 1.1630 | 0.9478 | 0.8477 | 0.9683 | 0.0681 |
| ZFYVE27    | 0.9109 | 1.1956 | 0.9472 | 0.8198 | 0.9683 | 0.0803 |
| RFX3       | 0.9171 | 1.2176 | 0.8941 | 0.8446 | 0.9683 | 0.0845 |
| ADAM3A     | 0.9182 | 1.1008 | 0.9926 | 0.8618 | 0.9683 | 0.0516 |
| SLC25A45   | 0.9780 | 1.1455 | 0.9371 | 0.8128 | 0.9683 | 0.0687 |
| SCTR       | 1.0070 | 1.0744 | 0.8913 | 0.9007 | 0.9683 | 0.0440 |
| SNORD15B   | 0.8452 | 1.0532 | 1.0483 | 0.9267 | 0.9684 | 0.0504 |
| SNORA14A   | 0.9081 | 1.0274 | 0.9516 | 0.9863 | 0.9684 | 0.0254 |
| DLG1       | 0.9891 | 1.1502 | 0.8517 | 0.8823 | 0.9684 | 0.0674 |
| IPF1       | 0.9386 | 1.0697 | 0.9597 | 0.9055 | 0.9684 | 0.0356 |
| STAB1      | 0.9068 | 1.0546 | 1.0665 | 0.8456 | 0.9684 | 0.0547 |
| MCART2     | 0.9436 | 1.0739 | 0.9799 | 0.8761 | 0.9684 | 0.0412 |
| LOC1001309 | 0.9008 | 1.0397 | 1.0165 | 0.9165 | 0.9684 | 0.0350 |
| MPPED1     | 0.8388 | 1.0703 | 0.9970 | 0.9673 | 0.9684 | 0.0483 |
| LOC148203  | 0.8992 | 1.0136 | 1.0285 | 0.9322 | 0.9684 | 0.0313 |
| LOC644680  | 0.9063 | 0.9995 | 1.0492 | 0.9185 | 0.9684 | 0.0340 |
| SNORA38    | 0.8810 | 1.1584 | 0.9200 | 0.9140 | 0.9684 | 0.0639 |
| OR11H4     | 0.8947 | 1.0595 | 0.9760 | 0.9433 | 0.9684 | 0.0347 |
| LOC644887  | 0.9273 | 0.9992 | 0.9867 | 0.9603 | 0.9684 | 0.0159 |
| HSFX1      | 0.8900 | 1.0763 | 0.9283 | 0.9790 | 0.9684 | 0.0403 |
| ITGA11     | 0.8761 | 1.0541 | 1.1107 | 0.8326 | 0.9684 | 0.0674 |
| RANBP3     | 0.9064 | 1.2774 | 0.8962 | 0.7936 | 0.9684 | 0.1061 |
| FLJ46361   | 0.8628 | 1.0813 | 1.0407 | 0.8888 | 0.9684 | 0.0543 |
| CD74       | 0.9387 | 1.0314 | 1.0346 | 0.8689 | 0.9684 | 0.0399 |
| LOC641942  | 1.0419 | 1.0106 | 0.9167 | 0.9044 | 0.9684 | 0.0341 |
| LOC646004  | 0.9107 | 0.9960 | 1.1352 | 0.8318 | 0.9684 | 0.0649 |
| INCA1      | 0.8848 | 1.0676 | 1.0926 | 0.8285 | 0.9684 | 0.0657 |
| LOC442434  | 0.9152 | 1.0201 | 0.9535 | 0.9848 | 0.9684 | 0.0224 |
| LOC645582  | 0.9147 | 1.0879 | 1.0106 | 0.8604 | 0.9684 | 0.0505 |
| LOC1001011 | 1.0011 | 1.0210 | 0.9700 | 0.8815 | 0.9684 | 0.0308 |
| C16orf87   | 0.8089 | 1.3994 | 0.9198 | 0.7456 | 0.9684 | 0.1481 |
| THEG       | 0.8759 | 1.1411 | 0.9468 | 0.9098 | 0.9684 | 0.0594 |
| LOC652645  | 0.9666 | 1.0533 | 1.0045 | 0.8493 | 0.9684 | 0.0435 |
| LOC646310  | 0.8749 | 1.0436 | 1.1024 | 0.8529 | 0.9684 | 0.0617 |
| TRPC4      | 0.7676 | 1.0370 | 1.0960 | 0.9730 | 0.9684 | 0.0715 |
| LOC647506  | 0.9871 | 0.9596 | 1.0797 | 0.8473 | 0.9684 | 0.0479 |
| MYL3       | 0.8267 | 1.0316 | 0.9789 | 1.0366 | 0.9684 | 0.0490 |

|            |        |        |        |        |        |        |
|------------|--------|--------|--------|--------|--------|--------|
| PBEF1      | 0.8798 | 1.1657 | 0.9761 | 0.8522 | 0.9684 | 0.0709 |
| MYO9B      | 0.8678 | 1.2494 | 0.8817 | 0.8748 | 0.9684 | 0.0937 |
| PCDHGA7    | 0.9595 | 1.0619 | 0.9673 | 0.8850 | 0.9684 | 0.0363 |
| C6orf134   | 0.9464 | 1.0203 | 1.0181 | 0.8890 | 0.9684 | 0.0316 |
| C14orf166B | 0.8892 | 1.0858 | 0.9723 | 0.9265 | 0.9684 | 0.0427 |
| LOC401589  | 0.9226 | 1.0762 | 1.0044 | 0.8705 | 0.9684 | 0.0453 |
| LOC728052  | 1.0015 | 1.0338 | 0.9441 | 0.8944 | 0.9685 | 0.0309 |
| FTHL19     | 0.8862 | 1.0659 | 1.0562 | 0.8655 | 0.9685 | 0.0537 |
| FAM66E     | 0.8682 | 1.0443 | 1.0240 | 0.9372 | 0.9685 | 0.0407 |
| FLJ22269   | 0.9328 | 0.9789 | 1.0764 | 0.8857 | 0.9685 | 0.0407 |
| MS4A5      | 0.8416 | 1.1477 | 0.9847 | 0.8998 | 0.9685 | 0.0666 |
| DHX57      | 0.9324 | 1.1634 | 0.9317 | 0.8463 | 0.9685 | 0.0681 |
| PATZ1      | 0.9238 | 1.1234 | 0.9162 | 0.9105 | 0.9685 | 0.0517 |
| FLJ43859   | 0.8667 | 1.0898 | 1.0147 | 0.9026 | 0.9685 | 0.0513 |
| LOC1001315 | 0.8785 | 1.0531 | 1.0261 | 0.9161 | 0.9685 | 0.0421 |
| LOC644621  | 0.9560 | 0.9624 | 1.1166 | 0.8390 | 0.9685 | 0.0569 |
| ZNF761     | 0.9099 | 1.2180 | 0.9341 | 0.8119 | 0.9685 | 0.0873 |
| ZNF658B    | 0.9041 | 1.1290 | 0.9628 | 0.8781 | 0.9685 | 0.0563 |
| LOC729626  | 0.8081 | 0.9922 | 1.0356 | 1.0381 | 0.9685 | 0.0545 |
| C12orf33   | 0.9126 | 0.9977 | 1.0350 | 0.9287 | 0.9685 | 0.0289 |
| LOC441488  | 0.9419 | 0.9503 | 1.0298 | 0.9519 | 0.9685 | 0.0205 |
| FABP2      | 0.9595 | 0.9567 | 1.0404 | 0.9174 | 0.9685 | 0.0258 |
| LOC644658  | 1.0126 | 1.0513 | 1.0054 | 0.8047 | 0.9685 | 0.0555 |
| SNAG1      | 1.0227 | 1.0489 | 0.9427 | 0.8597 | 0.9685 | 0.0427 |
| LOC649191  | 0.9656 | 1.0178 | 0.9427 | 0.9480 | 0.9685 | 0.0171 |
| LOC728143  | 0.9471 | 1.0151 | 1.0041 | 0.9078 | 0.9685 | 0.0251 |
| PXDNL      | 0.9787 | 1.0527 | 0.9199 | 0.9228 | 0.9685 | 0.0311 |
| LOC1001313 | 0.7962 | 1.0159 | 1.0989 | 0.9631 | 0.9685 | 0.0639 |
| LOC1001310 | 1.0045 | 0.9770 | 1.0076 | 0.8850 | 0.9685 | 0.0287 |
| LOC284274  | 0.9592 | 1.0535 | 0.9742 | 0.8872 | 0.9685 | 0.0341 |
| LOC727866  | 0.9319 | 1.0189 | 1.0165 | 0.9068 | 0.9685 | 0.0289 |
| LRRC16B    | 0.8813 | 1.0585 | 1.0277 | 0.9066 | 0.9685 | 0.0438 |
| LOC644569  | 0.8925 | 1.0665 | 1.0415 | 0.8736 | 0.9685 | 0.0498 |
| LOC401860  | 0.9857 | 1.0463 | 0.9386 | 0.9035 | 0.9685 | 0.0309 |
| FOXB1      | 0.9861 | 0.9789 | 1.0086 | 0.9005 | 0.9685 | 0.0235 |
| TREML3     | 0.9105 | 1.0012 | 1.0263 | 0.9361 | 0.9685 | 0.0271 |
| OR52B4     | 0.9455 | 1.0640 | 0.9374 | 0.9273 | 0.9685 | 0.0320 |
| TGM1       | 0.8556 | 1.1038 | 1.0410 | 0.8738 | 0.9686 | 0.0614 |
| LOC347487  | 0.9218 | 1.0094 | 1.1021 | 0.8410 | 0.9686 | 0.0562 |
| MGC11082   | 0.9068 | 1.0681 | 1.0218 | 0.8775 | 0.9686 | 0.0455 |
| LOC643388  | 0.8999 | 1.0586 | 1.0731 | 0.8427 | 0.9686 | 0.0574 |
| LOC1001342 | 0.9481 | 0.9740 | 0.9947 | 0.9575 | 0.9686 | 0.0102 |
| LOC653059  | 0.8632 | 1.0926 | 0.9800 | 0.9385 | 0.9686 | 0.0479 |
| LOC646887  | 0.9749 | 0.9593 | 1.0567 | 0.8834 | 0.9686 | 0.0355 |
| NTM        | 0.9416 | 1.0306 | 0.9992 | 0.9030 | 0.9686 | 0.0286 |
| LOC399491  | 0.9453 | 1.1021 | 0.9902 | 0.8368 | 0.9686 | 0.0549 |

|            |        |        |        |        |        |        |
|------------|--------|--------|--------|--------|--------|--------|
| LOC648657  | 0.9002 | 1.0773 | 1.0669 | 0.8300 | 0.9686 | 0.0615 |
| PRM2       | 0.9419 | 0.9715 | 1.0672 | 0.8938 | 0.9686 | 0.0366 |
| C20orf132  | 0.9133 | 1.0096 | 1.0055 | 0.9460 | 0.9686 | 0.0235 |
| DGCR5      | 0.9748 | 1.0425 | 1.0370 | 0.8201 | 0.9686 | 0.0518 |
| C5orf45    | 0.9305 | 1.1196 | 0.9688 | 0.8555 | 0.9686 | 0.0556 |
| LOC728522  | 0.9241 | 1.0731 | 0.9908 | 0.8865 | 0.9686 | 0.0410 |
| VANGL2     | 1.0571 | 1.1249 | 0.8980 | 0.7945 | 0.9686 | 0.0750 |
| LOC390846  | 1.0075 | 0.9989 | 0.9802 | 0.8880 | 0.9686 | 0.0275 |
| MAGED4     | 0.8188 | 1.0490 | 1.0332 | 0.9734 | 0.9686 | 0.0525 |
| LOC647213  | 0.9757 | 0.9956 | 0.9519 | 0.9513 | 0.9686 | 0.0106 |
| LOC651515  | 0.8758 | 1.1073 | 0.9790 | 0.9125 | 0.9686 | 0.0509 |
| CDON       | 0.9030 | 1.0316 | 1.0130 | 0.9269 | 0.9686 | 0.0316 |
| CPA1       | 0.9177 | 1.0419 | 1.0208 | 0.8940 | 0.9686 | 0.0368 |
| GPRIN3     | 0.9059 | 1.0769 | 1.0345 | 0.8571 | 0.9686 | 0.0520 |
| LOC652251  | 0.9430 | 1.1590 | 0.9314 | 0.8411 | 0.9686 | 0.0674 |
| LOC442668  | 0.9717 | 1.0610 | 0.8973 | 0.9446 | 0.9686 | 0.0344 |
| C9orf135   | 0.8645 | 1.1397 | 0.9916 | 0.8787 | 0.9686 | 0.0637 |
| FRK        | 1.0543 | 0.9382 | 0.9236 | 0.9584 | 0.9686 | 0.0294 |
| C9orf50    | 0.9066 | 1.0986 | 0.9435 | 0.9260 | 0.9687 | 0.0440 |
| LOC391132  | 0.9355 | 1.0787 | 1.0315 | 0.8289 | 0.9687 | 0.0553 |
| ST5        | 0.9554 | 1.1272 | 0.9136 | 0.8785 | 0.9687 | 0.0551 |
| VCPIP1     | 0.9016 | 1.1584 | 0.9527 | 0.8619 | 0.9687 | 0.0659 |
| LOC646403  | 0.9181 | 1.0653 | 0.9530 | 0.9383 | 0.9687 | 0.0330 |
| TERT       | 0.9156 | 1.0204 | 0.9761 | 0.9626 | 0.9687 | 0.0216 |
| LOC1001338 | 0.8565 | 1.0742 | 1.0798 | 0.8642 | 0.9687 | 0.0626 |
| PGBD5      | 0.9162 | 0.9646 | 1.0319 | 0.9620 | 0.9687 | 0.0238 |
| STAT4      | 0.8933 | 1.1104 | 0.9157 | 0.9553 | 0.9687 | 0.0489 |
| LOC1001307 | 0.9314 | 1.0949 | 0.9198 | 0.9286 | 0.9687 | 0.0422 |
| DNM3       | 0.8934 | 1.0713 | 1.0085 | 0.9015 | 0.9687 | 0.0431 |
| KPNA1      | 0.7472 | 1.3428 | 1.0343 | 0.7505 | 0.9687 | 0.1417 |
| PRO0132    | 0.9033 | 1.0735 | 0.8901 | 1.0079 | 0.9687 | 0.0438 |
| NRXN2      | 0.9195 | 1.1166 | 0.9644 | 0.8743 | 0.9687 | 0.0526 |
| MIR140     | 0.9942 | 0.9677 | 1.0251 | 0.8878 | 0.9687 | 0.0294 |
| SLC16A4    | 0.9454 | 1.0471 | 0.9604 | 0.9220 | 0.9687 | 0.0273 |
| SLCO2B1    | 0.9253 | 1.0367 | 1.0451 | 0.8677 | 0.9687 | 0.0433 |
| FBXL12     | 0.9359 | 1.2727 | 0.9006 | 0.7656 | 0.9687 | 0.1078 |
| CDX4       | 1.0387 | 0.9540 | 0.9889 | 0.8933 | 0.9687 | 0.0306 |
| LOC728170  | 0.8738 | 1.0923 | 0.9903 | 0.9184 | 0.9687 | 0.0477 |
| FLJ32252   | 0.8959 | 0.9837 | 1.0360 | 0.9593 | 0.9687 | 0.0291 |
| LOC1001329 | 1.0188 | 1.0221 | 0.9742 | 0.8598 | 0.9687 | 0.0379 |
| FGL2       | 0.8162 | 1.1319 | 1.0895 | 0.8373 | 0.9687 | 0.0825 |
| LOC1001294 | 0.9207 | 1.0180 | 1.0093 | 0.9270 | 0.9687 | 0.0260 |
| ISLR2      | 0.9379 | 1.1128 | 1.0399 | 0.7844 | 0.9688 | 0.0712 |
| ETV3       | 0.8440 | 1.2097 | 1.0622 | 0.7591 | 0.9688 | 0.1026 |
| FLJ37396   | 0.9315 | 1.1266 | 1.0031 | 0.8138 | 0.9688 | 0.0655 |
| LOC404266  | 0.9481 | 0.9744 | 1.0148 | 0.9377 | 0.9688 | 0.0172 |

|            |        |        |        |        |        |        |
|------------|--------|--------|--------|--------|--------|--------|
| LOC1001342 | 0.9302 | 1.0468 | 1.0065 | 0.8916 | 0.9688 | 0.0353 |
| SIX3       | 0.8438 | 1.0498 | 1.0536 | 0.9278 | 0.9688 | 0.0509 |
| LOC1001303 | 0.9112 | 1.0839 | 0.9348 | 0.9452 | 0.9688 | 0.0390 |
| LOC400831  | 0.9877 | 0.9633 | 1.0016 | 0.9226 | 0.9688 | 0.0173 |
| C6orf81    | 1.0021 | 1.0626 | 0.9901 | 0.8203 | 0.9688 | 0.0520 |
| TLX3       | 0.9731 | 1.1509 | 0.8672 | 0.8840 | 0.9688 | 0.0650 |
| ADRB3      | 0.9719 | 1.0201 | 0.9900 | 0.8931 | 0.9688 | 0.0271 |
| SNORD67    | 0.7950 | 1.1437 | 1.0861 | 0.8504 | 0.9688 | 0.0859 |
| IL7        | 0.9232 | 1.0239 | 1.0123 | 0.9159 | 0.9688 | 0.0286 |
| LOC643922  | 0.8692 | 1.1437 | 1.0392 | 0.8231 | 0.9688 | 0.0746 |
| LOC1001317 | 0.9338 | 1.0886 | 1.0145 | 0.8383 | 0.9688 | 0.0538 |
| FAM20C     | 0.9037 | 1.0718 | 0.9606 | 0.9392 | 0.9688 | 0.0363 |
| CT45-2     | 0.9228 | 1.0127 | 0.9662 | 0.9736 | 0.9688 | 0.0184 |
| LOC1001011 | 0.8749 | 1.0440 | 1.0653 | 0.8911 | 0.9688 | 0.0499 |
| LOC391124  | 0.9450 | 1.1130 | 0.9761 | 0.8413 | 0.9688 | 0.0560 |
| SNORD51    | 0.9147 | 1.0761 | 1.0152 | 0.8694 | 0.9688 | 0.0470 |
| GRM3       | 0.9368 | 1.0716 | 1.0058 | 0.8612 | 0.9688 | 0.0452 |
| FLJ44216   | 0.9854 | 1.0344 | 0.9248 | 0.9307 | 0.9688 | 0.0258 |
| LOC647634  | 0.9283 | 1.0626 | 0.9812 | 0.9034 | 0.9689 | 0.0352 |
| WDR52      | 0.8960 | 1.0675 | 1.0405 | 0.8714 | 0.9689 | 0.0497 |
| LOC392617  | 0.9462 | 1.1487 | 0.9742 | 0.8063 | 0.9689 | 0.0703 |
| IL12A      | 0.8425 | 1.1211 | 1.0347 | 0.8771 | 0.9689 | 0.0658 |
| C14orf118  | 0.9392 | 1.0940 | 1.0118 | 0.8305 | 0.9689 | 0.0559 |
| LRP1B      | 0.9300 | 1.0298 | 1.0516 | 0.8640 | 0.9689 | 0.0438 |
| LOC652678  | 1.0399 | 0.9653 | 0.9908 | 0.8794 | 0.9689 | 0.0336 |
| FSCN3      | 0.8537 | 1.0774 | 1.0275 | 0.9168 | 0.9689 | 0.0510 |
| C6orf204   | 0.8984 | 1.0895 | 1.0136 | 0.8740 | 0.9689 | 0.0504 |
| PNPO       | 0.7693 | 1.3719 | 1.0226 | 0.7117 | 0.9689 | 0.1504 |
| MEG8       | 1.0077 | 1.0660 | 1.0593 | 0.7425 | 0.9689 | 0.0766 |
| WDFY3      | 0.8646 | 1.1455 | 0.9693 | 0.8962 | 0.9689 | 0.0628 |
| ZNF280A    | 0.9005 | 1.0882 | 0.9777 | 0.9091 | 0.9689 | 0.0434 |
| LOC1001318 | 1.0165 | 1.0163 | 1.0190 | 0.8237 | 0.9689 | 0.0484 |
| FLJ35785   | 0.9327 | 1.1044 | 0.9704 | 0.8680 | 0.9689 | 0.0499 |
| LOC652730  | 0.9370 | 0.9968 | 1.0747 | 0.8670 | 0.9689 | 0.0441 |
| MYH3       | 0.9736 | 1.0921 | 0.9638 | 0.8460 | 0.9689 | 0.0503 |
| ROM1       | 0.8697 | 1.1609 | 1.0769 | 0.7680 | 0.9689 | 0.0907 |
| LOC388795  | 0.8833 | 1.0716 | 1.0031 | 0.9175 | 0.9689 | 0.0425 |
| C20orf166  | 0.8943 | 1.0184 | 1.0392 | 0.9237 | 0.9689 | 0.0354 |
| LOC651309  | 0.9172 | 0.9571 | 1.0305 | 0.9708 | 0.9689 | 0.0235 |
| LOC651133  | 0.9343 | 1.0568 | 1.0444 | 0.8401 | 0.9689 | 0.0510 |
| CBWD5      | 0.8902 | 1.2809 | 1.0267 | 0.6778 | 0.9689 | 0.1264 |
| OR2J3      | 0.8761 | 1.0576 | 1.0447 | 0.8972 | 0.9689 | 0.0478 |
| ADAP1      | 0.9542 | 1.1159 | 0.8761 | 0.9295 | 0.9689 | 0.0516 |
| OPCML      | 0.9172 | 0.9998 | 1.0216 | 0.9371 | 0.9689 | 0.0249 |
| TAGLN3     | 0.9188 | 1.1538 | 0.9272 | 0.8759 | 0.9689 | 0.0627 |
| LOC401622  | 0.9077 | 1.0799 | 0.9711 | 0.9171 | 0.9689 | 0.0395 |

|            |        |        |        |        |        |        |
|------------|--------|--------|--------|--------|--------|--------|
| CALML6     | 0.9780 | 1.0667 | 0.9681 | 0.8629 | 0.9689 | 0.0417 |
| LOC642198  | 0.9230 | 1.0260 | 1.0370 | 0.8898 | 0.9689 | 0.0368 |
| HOXB7      | 0.8552 | 1.1237 | 0.9987 | 0.8982 | 0.9689 | 0.0597 |
| LOC284215  | 0.9720 | 0.9685 | 1.0146 | 0.9208 | 0.9690 | 0.0192 |
| FLJ13197   | 0.8809 | 1.0694 | 1.0192 | 0.9064 | 0.9690 | 0.0450 |
| LOC1001290 | 0.9126 | 1.0439 | 1.0360 | 0.8833 | 0.9690 | 0.0415 |
| FN1        | 0.9612 | 1.0355 | 0.9696 | 0.9096 | 0.9690 | 0.0258 |
| FLJ43763   | 0.9830 | 0.9864 | 0.9579 | 0.9486 | 0.9690 | 0.0093 |
| TPD52L3    | 0.9857 | 1.0520 | 0.9771 | 0.8612 | 0.9690 | 0.0396 |
| STXBP1     | 1.0708 | 1.0871 | 0.9162 | 0.8018 | 0.9690 | 0.0677 |
| LOC1001299 | 0.9690 | 1.1202 | 0.9357 | 0.8510 | 0.9690 | 0.0562 |
| LOC653687  | 0.9009 | 1.1287 | 0.9752 | 0.8710 | 0.9690 | 0.0576 |
| ANXA8L1    | 0.8782 | 1.0435 | 1.0823 | 0.8719 | 0.9690 | 0.0548 |
| MIR1537    | 0.9044 | 1.0922 | 0.9981 | 0.8813 | 0.9690 | 0.0482 |
| SLC34A3    | 0.9947 | 1.0002 | 0.9883 | 0.8928 | 0.9690 | 0.0255 |
| CD36       | 0.8997 | 0.9806 | 1.0688 | 0.9269 | 0.9690 | 0.0373 |
| SPATA22    | 0.9505 | 0.9805 | 1.0073 | 0.9377 | 0.9690 | 0.0156 |
| LOC391033  | 0.8996 | 1.1101 | 0.9903 | 0.8760 | 0.9690 | 0.0531 |
| LOC644768  | 0.8900 | 1.0392 | 1.0672 | 0.8796 | 0.9690 | 0.0490 |
| LOC1001324 | 0.8330 | 1.1183 | 1.0892 | 0.8355 | 0.9690 | 0.0780 |
| C1orf138   | 0.9374 | 1.1963 | 0.9034 | 0.8389 | 0.9690 | 0.0785 |
| LOC648279  | 0.9572 | 1.0576 | 0.9844 | 0.8769 | 0.9690 | 0.0373 |
| ITGA8      | 0.9334 | 1.0342 | 1.0183 | 0.8901 | 0.9690 | 0.0344 |
| GAP43      | 0.9593 | 1.0349 | 0.8888 | 0.9930 | 0.9690 | 0.0309 |
| ETHE1      | 0.8680 | 1.1836 | 0.9510 | 0.8734 | 0.9690 | 0.0740 |
| LGTN       | 0.9117 | 1.1816 | 0.9904 | 0.7924 | 0.9690 | 0.0817 |
| GAB3       | 0.8963 | 1.1058 | 1.0297 | 0.8443 | 0.9690 | 0.0600 |
| TRIM35     | 0.8861 | 1.1230 | 1.0186 | 0.8484 | 0.9690 | 0.0630 |
| PPP1R14A   | 1.0693 | 1.0392 | 0.8854 | 0.8823 | 0.9690 | 0.0496 |
| SYCN       | 0.8648 | 1.0286 | 1.0361 | 0.9467 | 0.9690 | 0.0402 |
| ZNF781     | 0.9222 | 1.0901 | 1.0074 | 0.8564 | 0.9690 | 0.0508 |
| OR5M9      | 0.9944 | 0.9885 | 0.9967 | 0.8966 | 0.9690 | 0.0242 |
| JAM2       | 1.0029 | 1.0267 | 0.9697 | 0.8768 | 0.9690 | 0.0329 |
| LOC642475  | 0.9946 | 1.0451 | 0.9611 | 0.8754 | 0.9690 | 0.0357 |
| ADH6       | 0.9241 | 1.0840 | 1.0167 | 0.8513 | 0.9690 | 0.0511 |
| C17orf47   | 0.9024 | 1.0763 | 0.9987 | 0.8989 | 0.9690 | 0.0426 |
| ADAMTS3    | 0.9757 | 1.0151 | 0.9061 | 0.9793 | 0.9691 | 0.0228 |
| LOC1001330 | 0.9567 | 1.1259 | 0.9505 | 0.8432 | 0.9691 | 0.0584 |
| LOC650062  | 0.9259 | 1.0411 | 0.9974 | 0.9119 | 0.9691 | 0.0304 |
| C14orf19   | 0.9224 | 1.0047 | 1.0560 | 0.8932 | 0.9691 | 0.0374 |
| MERTK      | 0.9604 | 1.1342 | 0.9545 | 0.8272 | 0.9691 | 0.0630 |
| LRRC41     | 0.9038 | 1.5089 | 0.7487 | 0.7150 | 0.9691 | 0.1846 |
| ERC2       | 0.9368 | 1.1110 | 0.9608 | 0.8677 | 0.9691 | 0.0513 |
| PARL       | 0.8112 | 1.3567 | 1.0506 | 0.6578 | 0.9691 | 0.1524 |
| LOC1001331 | 0.7698 | 1.3832 | 0.9847 | 0.7385 | 0.9691 | 0.1485 |
| ACSL6      | 0.9489 | 1.0237 | 0.9835 | 0.9203 | 0.9691 | 0.0223 |

|            |        |        |        |        |        |        |
|------------|--------|--------|--------|--------|--------|--------|
| OR10P1     | 0.9316 | 0.9751 | 1.0788 | 0.8908 | 0.9691 | 0.0404 |
| LOC642380  | 0.8982 | 1.0204 | 1.0155 | 0.9422 | 0.9691 | 0.0296 |
| TRIM46     | 0.8657 | 1.1655 | 0.9778 | 0.8674 | 0.9691 | 0.0705 |
| BHLHE22    | 0.9191 | 1.0023 | 1.0052 | 0.9499 | 0.9691 | 0.0210 |
| LOC649120  | 0.9069 | 1.0302 | 0.9864 | 0.9529 | 0.9691 | 0.0261 |
| LOC1001345 | 0.9677 | 0.9596 | 1.0876 | 0.8615 | 0.9691 | 0.0463 |
| MSL1       | 0.8396 | 1.2225 | 1.0539 | 0.7604 | 0.9691 | 0.1048 |
| GDF1       | 0.9100 | 1.0675 | 0.9742 | 0.9248 | 0.9691 | 0.0356 |
| MPP4       | 0.8794 | 1.0949 | 0.9558 | 0.9464 | 0.9691 | 0.0453 |
| HPD        | 1.0118 | 1.0692 | 1.0007 | 0.7947 | 0.9691 | 0.0601 |
| SYMPK      | 1.0589 | 1.0471 | 0.9366 | 0.8339 | 0.9691 | 0.0528 |
| ARHGAP22   | 0.9546 | 0.9865 | 1.0334 | 0.9020 | 0.9691 | 0.0276 |
| TMIE       | 0.8861 | 1.0331 | 1.0312 | 0.9261 | 0.9691 | 0.0373 |
| MIR361     | 0.8526 | 1.1502 | 0.9955 | 0.8782 | 0.9691 | 0.0679 |
| LOC644587  | 0.9308 | 1.0428 | 0.9776 | 0.9253 | 0.9691 | 0.0272 |
| LOC644838  | 0.9122 | 1.0112 | 1.0538 | 0.8994 | 0.9691 | 0.0377 |
| LOC649086  | 0.8699 | 1.0736 | 1.0243 | 0.9088 | 0.9691 | 0.0478 |
| MIR30C2    | 0.9373 | 1.0232 | 1.0114 | 0.9047 | 0.9692 | 0.0287 |
| KCNQ1      | 0.9014 | 1.0792 | 0.9976 | 0.8985 | 0.9692 | 0.0433 |
| KRTAP3-2   | 0.9436 | 1.0107 | 1.0331 | 0.8892 | 0.9692 | 0.0327 |
| PRAMEF4    | 0.9472 | 1.0876 | 1.0109 | 0.8311 | 0.9692 | 0.0542 |
| CFTR       | 0.8005 | 1.1619 | 0.9532 | 0.9611 | 0.9692 | 0.0741 |
| LOC400388  | 0.9089 | 1.1246 | 0.9519 | 0.8913 | 0.9692 | 0.0533 |
| LOC1001330 | 0.8941 | 1.1275 | 0.9301 | 0.9250 | 0.9692 | 0.0534 |
| PLCL1      | 0.8646 | 1.0797 | 0.9806 | 0.9519 | 0.9692 | 0.0443 |
| LOC649896  | 1.0002 | 1.0403 | 0.9276 | 0.9087 | 0.9692 | 0.0308 |
| LOC1001325 | 0.9738 | 1.0296 | 1.0020 | 0.8714 | 0.9692 | 0.0345 |
| CKMT2      | 0.9564 | 1.0217 | 0.9739 | 0.9248 | 0.9692 | 0.0202 |
| KIF3C      | 0.9766 | 1.0784 | 0.9448 | 0.8770 | 0.9692 | 0.0419 |
| FAM23B     | 0.9387 | 0.9859 | 0.9467 | 1.0056 | 0.9692 | 0.0159 |
| COL29A1    | 0.9137 | 1.0545 | 0.9689 | 0.9396 | 0.9692 | 0.0306 |
| CEBPE      | 0.8850 | 1.0190 | 1.0375 | 0.9355 | 0.9692 | 0.0358 |
| XIRP1      | 0.8759 | 1.1671 | 0.9773 | 0.8565 | 0.9692 | 0.0711 |
| LOC650739  | 0.8531 | 1.0541 | 1.0885 | 0.8812 | 0.9692 | 0.0596 |
| GOS2       | 1.0098 | 0.9686 | 1.0435 | 0.8550 | 0.9692 | 0.0410 |
| IIP45      | 0.9433 | 1.0146 | 1.0192 | 0.8998 | 0.9692 | 0.0289 |
| MIR302D    | 0.8802 | 0.9731 | 1.0149 | 1.0087 | 0.9692 | 0.0311 |
| LOC729356  | 0.9108 | 1.1105 | 0.9839 | 0.8718 | 0.9692 | 0.0525 |
| LOC442382  | 0.8281 | 1.0338 | 1.0405 | 0.9746 | 0.9692 | 0.0493 |
| ACVR1B     | 0.9029 | 1.2855 | 0.9293 | 0.7592 | 0.9692 | 0.1119 |
| LOC653146  | 0.8408 | 1.1927 | 0.9838 | 0.8596 | 0.9692 | 0.0810 |
| LOC647849  | 0.9475 | 1.0317 | 0.9615 | 0.9362 | 0.9692 | 0.0214 |
| MIR1910    | 1.0975 | 0.9530 | 1.0309 | 0.7956 | 0.9692 | 0.0650 |
| LOC652698  | 0.9276 | 1.0760 | 1.0178 | 0.8556 | 0.9692 | 0.0486 |
| LOC388114  | 0.8578 | 1.1185 | 0.9800 | 0.9206 | 0.9693 | 0.0557 |
| DRD1       | 0.8527 | 1.1817 | 0.9656 | 0.8771 | 0.9693 | 0.0748 |

|            |        |        |        |        |        |        |
|------------|--------|--------|--------|--------|--------|--------|
| PTCRA      | 0.9505 | 1.1051 | 0.9913 | 0.8301 | 0.9693 | 0.0568 |
| LOC390748  | 0.9322 | 1.0662 | 1.0329 | 0.8459 | 0.9693 | 0.0500 |
| UBL4A      | 0.8211 | 1.3405 | 1.0544 | 0.6611 | 0.9693 | 0.1478 |
| LOC649415  | 0.9168 | 1.0116 | 1.1147 | 0.8340 | 0.9693 | 0.0606 |
| FAM106A    | 0.9274 | 1.0852 | 0.9859 | 0.8787 | 0.9693 | 0.0444 |
| SMTNL2     | 0.9317 | 1.1327 | 0.9477 | 0.8651 | 0.9693 | 0.0573 |
| LOC644373  | 0.8597 | 1.0563 | 1.1404 | 0.8208 | 0.9693 | 0.0769 |
| LMO3       | 0.8890 | 1.1475 | 0.9616 | 0.8792 | 0.9693 | 0.0622 |
| FLJ40411   | 0.9337 | 1.0166 | 1.0058 | 0.9212 | 0.9693 | 0.0244 |
| CD8B       | 0.9245 | 1.0644 | 0.9809 | 0.9074 | 0.9693 | 0.0354 |
| DPY19L2    | 0.9114 | 1.0119 | 1.0259 | 0.9281 | 0.9693 | 0.0290 |
| ATP5F1     | 0.8266 | 1.2956 | 1.0073 | 0.7477 | 0.9693 | 0.1216 |
| LOC339535  | 0.8378 | 1.1111 | 1.0620 | 0.8663 | 0.9693 | 0.0687 |
| LOC1001337 | 1.0071 | 0.9844 | 0.9975 | 0.8883 | 0.9693 | 0.0274 |
| LOC653471  | 1.0447 | 1.0820 | 0.9154 | 0.8352 | 0.9693 | 0.0572 |
| KIAA0853   | 0.9032 | 0.9373 | 0.9949 | 1.0419 | 0.9693 | 0.0307 |
| RNF19A     | 0.8388 | 1.1357 | 1.1355 | 0.7673 | 0.9693 | 0.0971 |
| C11orf35   | 0.9078 | 1.1811 | 0.9591 | 0.8293 | 0.9693 | 0.0755 |
| PFKFB1     | 0.9060 | 1.0229 | 1.0227 | 0.9258 | 0.9693 | 0.0311 |
| LOC653194  | 1.0318 | 1.0024 | 0.9714 | 0.8718 | 0.9693 | 0.0348 |
| YAF2       | 0.9373 | 1.0980 | 1.0096 | 0.8325 | 0.9693 | 0.0562 |
| VPS72      | 0.8356 | 1.2862 | 0.9233 | 0.8322 | 0.9694 | 0.1077 |
| GLUD2      | 0.7791 | 1.0816 | 1.0713 | 0.9454 | 0.9694 | 0.0706 |
| TMEM35     | 0.9042 | 1.0593 | 1.0093 | 0.9046 | 0.9694 | 0.0389 |
| LOC652662  | 0.9510 | 1.0282 | 1.0232 | 0.8750 | 0.9694 | 0.0361 |
| IL26       | 0.9172 | 1.0856 | 1.0547 | 0.8199 | 0.9694 | 0.0618 |
| ZNF333     | 0.9157 | 1.0480 | 0.9512 | 0.9627 | 0.9694 | 0.0280 |
| LOC647130  | 1.0606 | 0.9490 | 0.9112 | 0.9567 | 0.9694 | 0.0320 |
| LOC1001303 | 0.8511 | 1.1015 | 1.0615 | 0.8634 | 0.9694 | 0.0653 |
| C21orf74   | 0.9632 | 1.0792 | 1.0188 | 0.8163 | 0.9694 | 0.0563 |
| CLPS       | 0.8251 | 1.0685 | 0.9965 | 0.9874 | 0.9694 | 0.0514 |
| DRD3       | 0.9061 | 1.1629 | 0.9652 | 0.8433 | 0.9694 | 0.0691 |
| LOC392242  | 0.9138 | 0.9356 | 1.0171 | 1.0110 | 0.9694 | 0.0262 |
| LOC729642  | 0.9807 | 1.0866 | 0.9498 | 0.8605 | 0.9694 | 0.0467 |
| LOC646990  | 0.9285 | 1.1518 | 0.9999 | 0.7974 | 0.9694 | 0.0738 |
| LOC123855  | 0.8593 | 1.0491 | 0.9911 | 0.9782 | 0.9694 | 0.0398 |
| FGR        | 0.9177 | 1.0542 | 1.0225 | 0.8831 | 0.9694 | 0.0410 |
| GPR135     | 0.8714 | 1.0573 | 1.0279 | 0.9210 | 0.9694 | 0.0439 |
| LOC729456  | 0.9445 | 1.0434 | 1.0381 | 0.8517 | 0.9694 | 0.0453 |
| LOC645687  | 0.9636 | 0.9568 | 1.0588 | 0.8984 | 0.9694 | 0.0332 |
| WDR87      | 0.8981 | 1.0439 | 1.0050 | 0.9307 | 0.9694 | 0.0334 |
| LOC440981  | 0.9210 | 1.1373 | 0.9058 | 0.9135 | 0.9694 | 0.0560 |
| C14orf102  | 0.9272 | 1.3541 | 0.8565 | 0.7399 | 0.9694 | 0.1339 |
| KGFLP1     | 0.9336 | 1.1501 | 0.9601 | 0.8338 | 0.9694 | 0.0661 |
| DEFB122    | 0.8863 | 1.0870 | 0.9713 | 0.9331 | 0.9694 | 0.0429 |
| MYLK4      | 0.9441 | 1.0919 | 0.9792 | 0.8624 | 0.9694 | 0.0476 |



|            |        |        |        |        |        |        |
|------------|--------|--------|--------|--------|--------|--------|
| PGAP1      | 0.9022 | 1.1087 | 0.9494 | 0.9175 | 0.9694 | 0.0474 |
| KRT28      | 0.9373 | 1.0709 | 0.9932 | 0.8763 | 0.9694 | 0.0414 |
| SPINK4     | 0.9070 | 1.0669 | 0.9770 | 0.9268 | 0.9694 | 0.0357 |
| LOC1001279 | 0.8794 | 1.0400 | 1.0380 | 0.9204 | 0.9694 | 0.0410 |
| LOC644100  | 0.9085 | 1.1149 | 0.9982 | 0.8561 | 0.9694 | 0.0567 |
| SCRT1      | 0.8618 | 1.0856 | 0.9843 | 0.9460 | 0.9694 | 0.0464 |
| CCDC28A    | 0.8436 | 1.2805 | 0.9943 | 0.7594 | 0.9694 | 0.1145 |
| DAZ3       | 0.8439 | 1.1082 | 0.9818 | 0.9438 | 0.9694 | 0.0546 |
| TMEM154    | 0.9110 | 1.0744 | 0.9664 | 0.9259 | 0.9694 | 0.0369 |
| HOXA10     | 0.9075 | 1.0870 | 1.0567 | 0.8266 | 0.9694 | 0.0617 |
| TBC1D3C    | 0.9447 | 1.1361 | 0.9518 | 0.8453 | 0.9695 | 0.0606 |
| APCDD1L    | 0.8666 | 1.0937 | 1.0340 | 0.8836 | 0.9695 | 0.0560 |
| ZNF624     | 0.9282 | 1.1337 | 0.9098 | 0.9061 | 0.9695 | 0.0550 |
| MIR1183    | 0.9458 | 1.0202 | 1.0647 | 0.8472 | 0.9695 | 0.0476 |
| LOC1001280 | 0.8282 | 1.1659 | 0.9923 | 0.8914 | 0.9695 | 0.0737 |
| C9orf62    | 1.0386 | 1.0425 | 1.0041 | 0.7926 | 0.9695 | 0.0596 |
| LOC729905  | 0.9002 | 1.1075 | 1.0642 | 0.8060 | 0.9695 | 0.0705 |
| WHAMM      | 0.8239 | 1.3110 | 0.9696 | 0.7735 | 0.9695 | 0.1212 |
| MCM3AP     | 0.9253 | 1.3386 | 0.8938 | 0.7202 | 0.9695 | 0.1310 |
| LOC1001290 | 0.8616 | 1.1283 | 1.0119 | 0.8762 | 0.9695 | 0.0628 |
| LOC644477  | 0.9772 | 1.0179 | 0.9807 | 0.9023 | 0.9695 | 0.0242 |
| LOC644496  | 0.9201 | 1.0534 | 1.0046 | 0.8998 | 0.9695 | 0.0360 |
| NEDD8      | 0.7573 | 1.3185 | 0.9955 | 0.8067 | 0.9695 | 0.1272 |
| LOC646366  | 0.9669 | 1.0491 | 0.9534 | 0.9086 | 0.9695 | 0.0293 |
| LILRB4     | 0.8647 | 1.1049 | 0.9930 | 0.9154 | 0.9695 | 0.0523 |
| FLJ32790   | 0.8532 | 1.0519 | 1.0706 | 0.9024 | 0.9695 | 0.0540 |
| LELP1      | 0.8949 | 0.9468 | 1.0559 | 0.9804 | 0.9695 | 0.0337 |
| LOC285453  | 0.8606 | 1.0727 | 1.0401 | 0.9047 | 0.9695 | 0.0514 |
| ITGA3      | 0.8484 | 1.1470 | 1.0288 | 0.8538 | 0.9695 | 0.0725 |
| ZNF469     | 0.9188 | 1.0471 | 0.9866 | 0.9256 | 0.9695 | 0.0300 |
| SMC6       | 1.0591 | 0.9747 | 0.9380 | 0.9063 | 0.9695 | 0.0330 |
| UROC1      | 0.9426 | 1.0892 | 1.0004 | 0.8459 | 0.9695 | 0.0511 |
| LOC650965  | 0.8400 | 1.0578 | 1.0254 | 0.9549 | 0.9695 | 0.0482 |
| MIR454     | 0.9573 | 1.1132 | 0.9603 | 0.8473 | 0.9695 | 0.0546 |
| LOC643690  | 0.9996 | 1.0795 | 1.0070 | 0.7921 | 0.9695 | 0.0618 |
| MIR483     | 0.9437 | 1.0249 | 1.0236 | 0.8859 | 0.9695 | 0.0337 |
| LOC1001338 | 0.8380 | 1.2389 | 0.9741 | 0.8271 | 0.9695 | 0.0958 |
| LOC134505  | 0.9462 | 1.0528 | 0.9796 | 0.8995 | 0.9695 | 0.0323 |
| SAMD12     | 1.0296 | 0.9848 | 0.9600 | 0.9038 | 0.9695 | 0.0262 |
| MEFV       | 0.9833 | 1.0483 | 0.9543 | 0.8923 | 0.9696 | 0.0324 |
| LOC643154  | 0.8015 | 1.0604 | 1.0379 | 0.9784 | 0.9696 | 0.0586 |
| MIR196B    | 0.9493 | 1.0668 | 1.0642 | 0.7979 | 0.9696 | 0.0634 |
| LOC1001286 | 0.8775 | 1.1767 | 0.9151 | 0.9091 | 0.9696 | 0.0695 |
| MIR16-2    | 0.9911 | 1.0133 | 0.9854 | 0.8885 | 0.9696 | 0.0277 |
| LOC642606  | 0.9635 | 1.0831 | 1.0068 | 0.8249 | 0.9696 | 0.0542 |
| ALOX5      | 0.9499 | 1.0223 | 0.9773 | 0.9288 | 0.9696 | 0.0202 |

|            |        |        |        |        |        |        |
|------------|--------|--------|--------|--------|--------|--------|
| C14orf115  | 0.8698 | 1.0482 | 1.0328 | 0.9275 | 0.9696 | 0.0427 |
| CDH19      | 0.9457 | 1.0342 | 0.9465 | 0.9518 | 0.9696 | 0.0216 |
| LOC439965  | 0.9589 | 1.1504 | 0.9327 | 0.8363 | 0.9696 | 0.0658 |
| SMOC2      | 0.9608 | 1.0031 | 0.9902 | 0.9242 | 0.9696 | 0.0175 |
| LOC730235  | 1.0418 | 1.0820 | 0.9312 | 0.8234 | 0.9696 | 0.0582 |
| LOC652436  | 0.8606 | 1.0628 | 1.0420 | 0.9130 | 0.9696 | 0.0492 |
| LOC1001323 | 0.8720 | 1.1020 | 0.9699 | 0.9345 | 0.9696 | 0.0485 |
| LOC727994  | 0.8715 | 1.0933 | 1.0063 | 0.9073 | 0.9696 | 0.0501 |
| LOC1001313 | 0.8974 | 1.0761 | 1.0252 | 0.8796 | 0.9696 | 0.0481 |
| LOC651357  | 0.8400 | 1.0703 | 1.1021 | 0.8659 | 0.9696 | 0.0678 |
| S100A8     | 0.9456 | 1.0581 | 1.0193 | 0.8555 | 0.9696 | 0.0446 |
| LOC1001336 | 0.8808 | 1.0913 | 0.9869 | 0.9195 | 0.9696 | 0.0461 |
| SULT1C4    | 0.9604 | 1.0684 | 0.9969 | 0.8530 | 0.9696 | 0.0449 |
| LOC642978  | 0.8771 | 1.1646 | 0.9541 | 0.8827 | 0.9696 | 0.0673 |
| PDE5A      | 0.9354 | 1.0527 | 0.9645 | 0.9259 | 0.9696 | 0.0289 |
| COL6A6     | 0.9308 | 1.0133 | 1.0269 | 0.9075 | 0.9696 | 0.0297 |
| LOC442283  | 1.0549 | 0.9359 | 0.9645 | 0.9234 | 0.9697 | 0.0297 |
| RASGRP1    | 0.9307 | 1.0872 | 0.9153 | 0.9454 | 0.9697 | 0.0397 |
| UNC119     | 0.8189 | 1.3320 | 0.9647 | 0.7630 | 0.9697 | 0.1280 |
| TMEM200C   | 0.9626 | 0.9815 | 1.0071 | 0.9275 | 0.9697 | 0.0167 |
| LOC285556  | 0.9229 | 1.1900 | 1.0136 | 0.7521 | 0.9697 | 0.0913 |
| LOC643486  | 0.8908 | 0.9928 | 1.0404 | 0.9547 | 0.9697 | 0.0316 |
| GPR124     | 0.8580 | 1.1061 | 0.9005 | 1.0140 | 0.9697 | 0.0561 |
| LOC644246  | 0.9875 | 1.0202 | 0.9794 | 0.8916 | 0.9697 | 0.0275 |
| LOC729153  | 0.9572 | 1.0458 | 1.0037 | 0.8720 | 0.9697 | 0.0372 |
| MINK1      | 0.9062 | 1.1276 | 0.8819 | 0.9631 | 0.9697 | 0.0553 |
| SSBP3      | 0.8930 | 1.2475 | 0.9829 | 0.7553 | 0.9697 | 0.1038 |
| LOC388630  | 0.9311 | 1.0661 | 0.9701 | 0.9115 | 0.9697 | 0.0344 |
| C6orf155   | 0.8995 | 1.0502 | 1.1579 | 0.7711 | 0.9697 | 0.0848 |
| ST7OT2     | 0.8621 | 1.0719 | 1.0235 | 0.9213 | 0.9697 | 0.0477 |
| LOC643345  | 0.8986 | 0.9709 | 1.0141 | 0.9951 | 0.9697 | 0.0253 |
| LOC649587  | 0.8932 | 1.0921 | 0.9620 | 0.9315 | 0.9697 | 0.0432 |
| AGBL4      | 0.9219 | 0.9905 | 0.9755 | 0.9908 | 0.9697 | 0.0163 |
| LOC1001329 | 1.0256 | 1.0470 | 0.9131 | 0.8930 | 0.9697 | 0.0389 |
| COL10A1    | 0.9227 | 1.0327 | 1.0164 | 0.9069 | 0.9697 | 0.0320 |
| LOC647843  | 0.9956 | 1.0510 | 0.9609 | 0.8713 | 0.9697 | 0.0377 |
| C9orf171   | 0.9080 | 0.9823 | 1.0902 | 0.8984 | 0.9697 | 0.0443 |
| GDA        | 0.9281 | 1.0893 | 0.9907 | 0.8708 | 0.9697 | 0.0468 |
| LOC652246  | 0.8900 | 1.0813 | 0.9728 | 0.9348 | 0.9697 | 0.0409 |
| SPINLW1    | 0.9258 | 1.0860 | 0.9469 | 0.9203 | 0.9697 | 0.0392 |
| PPM1L      | 0.9537 | 1.0629 | 1.0131 | 0.8492 | 0.9697 | 0.0460 |
| SMAD6      | 0.9991 | 1.0910 | 0.8785 | 0.9102 | 0.9697 | 0.0478 |
| FAM163A    | 0.9931 | 1.1186 | 0.9646 | 0.8025 | 0.9697 | 0.0650 |
| THSD1P     | 0.9633 | 1.1081 | 0.9243 | 0.8832 | 0.9697 | 0.0489 |
| PSKH1      | 0.8700 | 1.2290 | 0.9847 | 0.7952 | 0.9697 | 0.0948 |
| PTPRQ      | 0.7421 | 1.1704 | 1.1215 | 0.8449 | 0.9697 | 0.1044 |

|            |        |        |        |        |        |        |
|------------|--------|--------|--------|--------|--------|--------|
| LOC1001327 | 0.8797 | 1.1304 | 1.0118 | 0.8570 | 0.9697 | 0.0635 |
| NR1H4      | 0.9542 | 1.0795 | 0.9296 | 0.9156 | 0.9697 | 0.0375 |
| SLC39A12   | 0.9053 | 1.0616 | 0.9600 | 0.9520 | 0.9697 | 0.0329 |
| ADAMTS6    | 0.8885 | 1.0454 | 1.0068 | 0.9382 | 0.9697 | 0.0350 |
| LOC647156  | 0.8985 | 1.1069 | 0.9725 | 0.9011 | 0.9697 | 0.0488 |
| TTC15      | 0.9429 | 1.1313 | 0.9929 | 0.8119 | 0.9697 | 0.0660 |
| LOC1001297 | 0.9223 | 1.0769 | 0.9198 | 0.9599 | 0.9697 | 0.0369 |
| KRTDAP     | 0.9297 | 1.0307 | 0.9617 | 0.9568 | 0.9697 | 0.0215 |
| PPP2R1A    | 0.8223 | 1.4544 | 0.8862 | 0.7162 | 0.9698 | 0.1653 |
| CEP57      | 0.9399 | 1.1388 | 1.0151 | 0.7852 | 0.9698 | 0.0739 |
| LOC642360  | 1.0420 | 0.9599 | 0.9913 | 0.8858 | 0.9698 | 0.0327 |
| PDLIM3     | 0.9491 | 1.0878 | 0.9861 | 0.8561 | 0.9698 | 0.0479 |
| SNX31      | 0.9448 | 1.0264 | 1.0267 | 0.8812 | 0.9698 | 0.0353 |
| AGR3       | 0.8912 | 1.0951 | 0.9891 | 0.9037 | 0.9698 | 0.0471 |
| TNFRSF14   | 0.9721 | 1.0906 | 1.0476 | 0.7689 | 0.9698 | 0.0713 |
| INE1       | 0.9957 | 1.1386 | 0.8856 | 0.8593 | 0.9698 | 0.0635 |
| KRTAP3-1   | 0.9572 | 1.0037 | 1.0142 | 0.9041 | 0.9698 | 0.0252 |
| LOC728586  | 0.9023 | 1.0123 | 1.0576 | 0.9070 | 0.9698 | 0.0387 |
| LOC729261  | 0.9063 | 1.0504 | 0.9642 | 0.9583 | 0.9698 | 0.0298 |
| PRICKLE2   | 0.9742 | 1.0687 | 1.0166 | 0.8198 | 0.9698 | 0.0536 |
| AGPAT6     | 0.9042 | 1.2412 | 0.8936 | 0.8403 | 0.9698 | 0.0915 |
| USP42      | 0.8595 | 1.3209 | 0.9807 | 0.7182 | 0.9698 | 0.1287 |
| LOC729400  | 0.9793 | 0.9532 | 0.9943 | 0.9525 | 0.9698 | 0.0103 |
| LOC643807  | 0.9024 | 1.0428 | 1.0515 | 0.8827 | 0.9698 | 0.0449 |
| LOC1001290 | 0.9848 | 0.9841 | 1.0203 | 0.8901 | 0.9698 | 0.0279 |
| OTUD6A     | 0.9595 | 0.9996 | 1.0183 | 0.9020 | 0.9698 | 0.0257 |
| OR4N2      | 0.9822 | 0.9735 | 1.0484 | 0.8752 | 0.9698 | 0.0357 |
| HAL        | 0.8852 | 1.0539 | 1.0856 | 0.8548 | 0.9698 | 0.0584 |
| LOC646198  | 0.8871 | 1.1793 | 0.9813 | 0.8317 | 0.9699 | 0.0763 |
| NBR1       | 0.8373 | 1.1491 | 1.0562 | 0.8368 | 0.9699 | 0.0790 |
| LOC646361  | 0.9806 | 1.0104 | 1.0312 | 0.8572 | 0.9699 | 0.0389 |
| RUNX1T1    | 0.9299 | 1.0686 | 1.0053 | 0.8756 | 0.9699 | 0.0423 |
| LOC732172  | 0.9166 | 1.0828 | 0.9212 | 0.9589 | 0.9699 | 0.0388 |
| ZNF665     | 0.9133 | 0.9928 | 0.9814 | 0.9920 | 0.9699 | 0.0190 |
| GPR114     | 0.9227 | 1.0729 | 0.9736 | 0.9102 | 0.9699 | 0.0370 |
| LOC115648  | 0.9648 | 1.1326 | 1.0582 | 0.7239 | 0.9699 | 0.0889 |
| LOC1001305 | 0.9097 | 1.0264 | 1.0874 | 0.8560 | 0.9699 | 0.0529 |
| LOC1001326 | 0.8907 | 1.0734 | 0.9938 | 0.9216 | 0.9699 | 0.0407 |
| LOC652685  | 0.7496 | 1.4332 | 1.0645 | 0.6322 | 0.9699 | 0.1794 |
| LOC391592  | 0.9438 | 1.0438 | 0.9712 | 0.9208 | 0.9699 | 0.0267 |
| LOC651495  | 0.9862 | 1.0076 | 0.9585 | 0.9272 | 0.9699 | 0.0174 |
| C16orf67   | 1.0117 | 1.0549 | 0.9594 | 0.8535 | 0.9699 | 0.0434 |
| LOC643621  | 0.9598 | 0.9514 | 1.0482 | 0.9202 | 0.9699 | 0.0275 |
| ERCC-00035 | 0.8915 | 1.0955 | 1.0486 | 0.8439 | 0.9699 | 0.0605 |
| FLJ11827   | 0.8746 | 1.1560 | 1.0135 | 0.8355 | 0.9699 | 0.0729 |
| LOC653521  | 0.8063 | 1.1409 | 1.0744 | 0.8580 | 0.9699 | 0.0814 |

|            |        |        |        |        |        |        |
|------------|--------|--------|--------|--------|--------|--------|
| DEFB107A   | 0.9067 | 1.1428 | 1.0010 | 0.8291 | 0.9699 | 0.0675 |
| LOC642277  | 0.9575 | 0.9960 | 1.0356 | 0.8904 | 0.9699 | 0.0309 |
| SCHIP1     | 0.9845 | 1.0591 | 0.9587 | 0.8773 | 0.9699 | 0.0375 |
| LOC401730  | 0.8679 | 1.0903 | 0.9869 | 0.9345 | 0.9699 | 0.0469 |
| LOC1001343 | 1.0305 | 1.0171 | 0.9697 | 0.8624 | 0.9699 | 0.0382 |
| PIBF1      | 0.8992 | 1.1043 | 0.9263 | 0.9499 | 0.9699 | 0.0460 |
| ANKRD20A3  | 0.8426 | 1.0656 | 1.0583 | 0.9132 | 0.9699 | 0.0551 |
| RIMBP3B    | 0.9912 | 0.9373 | 1.0214 | 0.9298 | 0.9699 | 0.0219 |
| FLJ46309   | 0.8354 | 1.2126 | 1.1150 | 0.7168 | 0.9699 | 0.1162 |
| ACCN4      | 0.9591 | 1.0376 | 0.9614 | 0.9217 | 0.9699 | 0.0243 |
| SNORA26    | 0.9324 | 1.0882 | 1.0210 | 0.8381 | 0.9699 | 0.0543 |
| CPSF3L     | 0.9217 | 1.1887 | 0.9923 | 0.7770 | 0.9699 | 0.0856 |
| VOPP1      | 0.8126 | 1.2838 | 0.9073 | 0.8761 | 0.9699 | 0.1065 |
| DNAH9      | 0.9603 | 0.9927 | 1.0179 | 0.9090 | 0.9699 | 0.0235 |
| ADAM33     | 0.8691 | 1.1266 | 0.9745 | 0.9096 | 0.9699 | 0.0566 |
| LOC654056  | 0.8455 | 0.9979 | 0.9791 | 1.0572 | 0.9699 | 0.0447 |
| LOC402057  | 0.8498 | 1.2386 | 0.9991 | 0.7923 | 0.9699 | 0.0996 |
| ICAM4      | 0.8250 | 1.0867 | 1.0097 | 0.9584 | 0.9700 | 0.0550 |
| LOC390714  | 0.8720 | 1.0769 | 1.0383 | 0.8927 | 0.9700 | 0.0514 |
| LOC729417  | 0.9065 | 1.1298 | 1.0368 | 0.8068 | 0.9700 | 0.0711 |
| KRT31      | 0.8794 | 1.1283 | 0.9975 | 0.8747 | 0.9700 | 0.0599 |
| ZNF826     | 0.9252 | 1.0771 | 1.0053 | 0.8724 | 0.9700 | 0.0450 |
| LOC646625  | 0.9563 | 1.0814 | 0.9170 | 0.9252 | 0.9700 | 0.0381 |
| LOC645253  | 0.9770 | 1.1532 | 0.8043 | 0.9453 | 0.9700 | 0.0717 |
| GEN1       | 0.9479 | 1.0494 | 1.0080 | 0.8747 | 0.9700 | 0.0380 |
| WNK4       | 0.9592 | 1.0684 | 0.9396 | 0.9127 | 0.9700 | 0.0342 |
| TPK1       | 0.9036 | 1.1104 | 1.0331 | 0.8329 | 0.9700 | 0.0625 |
| SNORA29    | 0.9326 | 1.0939 | 0.9194 | 0.9341 | 0.9700 | 0.0414 |
| LOC1001335 | 0.8041 | 1.3091 | 0.8621 | 0.9047 | 0.9700 | 0.1149 |
| DPP6       | 0.9289 | 1.0745 | 0.9747 | 0.9019 | 0.9700 | 0.0379 |
| LOC731236  | 0.8834 | 1.1448 | 0.9970 | 0.8548 | 0.9700 | 0.0658 |
| OTUB2      | 0.9363 | 1.0561 | 0.9727 | 0.9149 | 0.9700 | 0.0311 |
| CPNE4      | 0.9628 | 1.0360 | 0.9959 | 0.8854 | 0.9700 | 0.0319 |
| LOC653441  | 0.9441 | 1.0616 | 0.9889 | 0.8854 | 0.9700 | 0.0372 |
| MCHR1      | 0.9716 | 1.0943 | 0.9252 | 0.8890 | 0.9700 | 0.0447 |
| EBF1       | 0.9523 | 1.0716 | 0.9521 | 0.9040 | 0.9700 | 0.0357 |
| FOSL2      | 0.8816 | 1.1751 | 1.0495 | 0.7739 | 0.9700 | 0.0888 |
| PRELID2    | 0.9611 | 1.0213 | 1.0313 | 0.8663 | 0.9700 | 0.0379 |
| HORMAD1    | 1.0136 | 1.0002 | 0.9952 | 0.8711 | 0.9700 | 0.0332 |
| MIR541     | 0.9695 | 1.0690 | 0.9170 | 0.9246 | 0.9700 | 0.0350 |
| LOC391747  | 0.8843 | 1.1093 | 1.0178 | 0.8687 | 0.9700 | 0.0572 |
| LOC1001315 | 0.9089 | 1.0098 | 1.0476 | 0.9139 | 0.9700 | 0.0347 |
| NMT1       | 1.0236 | 1.2125 | 0.9398 | 0.7043 | 0.9700 | 0.1054 |
| LOC732393  | 0.9207 | 1.0601 | 1.0316 | 0.8678 | 0.9700 | 0.0454 |
| C4orf21    | 0.9381 | 0.9948 | 1.0078 | 0.9395 | 0.9701 | 0.0182 |
| IQCJ       | 0.9636 | 1.0721 | 0.9775 | 0.8671 | 0.9701 | 0.0419 |

|            |        |        |        |        |        |        |
|------------|--------|--------|--------|--------|--------|--------|
| C15orf32   | 0.9162 | 1.0198 | 1.0338 | 0.9104 | 0.9701 | 0.0329 |
| DUPD1      | 0.8265 | 1.0605 | 1.1526 | 0.8407 | 0.9701 | 0.0810 |
| LOC652664  | 0.9232 | 1.0801 | 0.9909 | 0.8861 | 0.9701 | 0.0426 |
| FLJ45256   | 0.8839 | 1.0651 | 1.0826 | 0.8487 | 0.9701 | 0.0604 |
| CDH10      | 0.7945 | 1.1283 | 1.0092 | 0.9484 | 0.9701 | 0.0694 |
| LOC441956  | 0.9308 | 1.0288 | 1.0245 | 0.8962 | 0.9701 | 0.0334 |
| LOC1001296 | 0.8900 | 1.1549 | 0.9722 | 0.8633 | 0.9701 | 0.0658 |
| LOC1001340 | 0.8198 | 1.2827 | 0.8726 | 0.9053 | 0.9701 | 0.1057 |
| LOC1001289 | 0.9721 | 1.1037 | 0.9450 | 0.8596 | 0.9701 | 0.0506 |
| LOC645730  | 0.9146 | 0.9678 | 1.0160 | 0.9820 | 0.9701 | 0.0211 |
| LOC643006  | 0.9244 | 1.0860 | 1.0501 | 0.8199 | 0.9701 | 0.0609 |
| LOC158376  | 1.0069 | 1.0017 | 0.8926 | 0.9792 | 0.9701 | 0.0265 |
| TES        | 0.9989 | 1.0836 | 0.9668 | 0.8311 | 0.9701 | 0.0525 |
| IVL        | 0.8852 | 1.1439 | 0.9158 | 0.9356 | 0.9701 | 0.0588 |
| PHOSPHO2   | 0.8660 | 1.1635 | 1.0528 | 0.7981 | 0.9701 | 0.0840 |
| TMEM231    | 0.9628 | 1.2083 | 0.9062 | 0.8031 | 0.9701 | 0.0860 |
| NIPSNAP3B  | 1.0026 | 0.9445 | 1.0251 | 0.9082 | 0.9701 | 0.0267 |
| LOC642570  | 0.9753 | 1.1312 | 0.9854 | 0.7885 | 0.9701 | 0.0702 |
| CYP26A1    | 0.9428 | 1.0201 | 0.9958 | 0.9218 | 0.9701 | 0.0228 |
| AGBL2      | 0.8417 | 1.1412 | 0.9533 | 0.9445 | 0.9701 | 0.0624 |
| LOC646867  | 0.9437 | 0.9922 | 1.0288 | 0.9159 | 0.9701 | 0.0251 |
| LOC1001322 | 0.9072 | 1.0757 | 1.0105 | 0.8872 | 0.9702 | 0.0444 |
| LOC650373  | 0.9178 | 1.0306 | 1.0464 | 0.8858 | 0.9702 | 0.0401 |
| LOC652585  | 0.8915 | 1.0424 | 0.9769 | 0.9698 | 0.9702 | 0.0309 |
| LOC1001323 | 0.9420 | 1.2057 | 0.8510 | 0.8820 | 0.9702 | 0.0808 |
| GUCA1C     | 0.8728 | 1.1901 | 0.9137 | 0.9040 | 0.9702 | 0.0738 |
| PPP1R3A    | 0.8732 | 1.1571 | 0.9716 | 0.8789 | 0.9702 | 0.0663 |
| LOC727753  | 0.9300 | 1.1417 | 1.0920 | 0.7169 | 0.9702 | 0.0958 |
| PLAUR      | 0.9479 | 1.0653 | 0.9941 | 0.8734 | 0.9702 | 0.0403 |
| DKFZp667F0 | 0.8949 | 1.0329 | 1.0139 | 0.9390 | 0.9702 | 0.0322 |
| LOC649635  | 0.9899 | 1.0522 | 1.0134 | 0.8253 | 0.9702 | 0.0500 |
| SNORD114-1 | 0.8724 | 1.1314 | 0.9475 | 0.9294 | 0.9702 | 0.0561 |
| LOC647042  | 0.9072 | 1.1330 | 0.9494 | 0.8912 | 0.9702 | 0.0556 |
| LY6G5C     | 0.9113 | 1.0297 | 0.9786 | 0.9611 | 0.9702 | 0.0244 |
| LYN        | 0.7457 | 1.2753 | 1.0693 | 0.7905 | 0.9702 | 0.1244 |
| PCDHA10    | 0.9097 | 0.9834 | 1.0271 | 0.9606 | 0.9702 | 0.0244 |
| USP35      | 0.8756 | 1.1151 | 0.9521 | 0.9380 | 0.9702 | 0.0511 |
| LOC646562  | 0.8897 | 1.0093 | 1.1169 | 0.8649 | 0.9702 | 0.0582 |
| LOC646334  | 0.8654 | 1.0864 | 1.0085 | 0.9206 | 0.9702 | 0.0487 |
| LOC646200  | 0.7082 | 1.3750 | 1.1431 | 0.6546 | 0.9702 | 0.1737 |
| APOL4      | 0.9384 | 1.0848 | 0.9245 | 0.9330 | 0.9702 | 0.0383 |
| C18orf16   | 0.8445 | 0.9923 | 1.1095 | 0.9346 | 0.9702 | 0.0555 |
| DNM1       | 0.9032 | 1.0765 | 0.9892 | 0.9120 | 0.9702 | 0.0403 |
| WDR70      | 0.7144 | 1.3257 | 1.1247 | 0.7161 | 0.9702 | 0.1528 |
| LOC729756  | 0.8663 | 1.1043 | 0.9831 | 0.9272 | 0.9702 | 0.0507 |
| RBMX1B     | 0.9952 | 0.9396 | 0.9857 | 0.9604 | 0.9702 | 0.0126 |

|            |        |        |        |        |        |        |
|------------|--------|--------|--------|--------|--------|--------|
| OR2M1P     | 0.8611 | 1.0699 | 1.0207 | 0.9292 | 0.9702 | 0.0466 |
| ERCC-00014 | 0.9104 | 1.0150 | 1.0730 | 0.8826 | 0.9702 | 0.0446 |
| BPESC1     | 0.9585 | 1.1977 | 0.9169 | 0.8079 | 0.9702 | 0.0822 |
| ITGAX      | 0.9184 | 1.0519 | 0.9746 | 0.9361 | 0.9702 | 0.0296 |
| P2RX7      | 0.9489 | 1.0744 | 0.9924 | 0.8653 | 0.9702 | 0.0436 |
| LOC390880  | 0.9593 | 0.9490 | 0.9924 | 0.9803 | 0.9702 | 0.0099 |
| MGC29506   | 0.8672 | 1.0856 | 1.0434 | 0.8849 | 0.9703 | 0.0552 |
| C21orf81   | 0.8191 | 1.0508 | 1.0682 | 0.9429 | 0.9703 | 0.0575 |
| CACNA1E    | 0.8292 | 1.1137 | 1.0533 | 0.8848 | 0.9703 | 0.0675 |
| LOC1001292 | 0.8563 | 1.1406 | 0.9731 | 0.9111 | 0.9703 | 0.0616 |
| LOC1001291 | 0.8424 | 1.0623 | 1.0412 | 0.9352 | 0.9703 | 0.0509 |
| CRLF2      | 0.9764 | 1.0492 | 0.9862 | 0.8693 | 0.9703 | 0.0373 |
| LOC652881  | 0.8823 | 1.0297 | 1.0501 | 0.9190 | 0.9703 | 0.0411 |
| SUV420H1   | 0.8441 | 1.3180 | 0.9287 | 0.7903 | 0.9703 | 0.1194 |
| CHI3L1     | 0.9252 | 1.0515 | 0.9684 | 0.9361 | 0.9703 | 0.0286 |
| LOC440956  | 0.8719 | 1.1463 | 1.0781 | 0.7849 | 0.9703 | 0.0850 |
| LOC644951  | 0.9292 | 1.0500 | 1.0072 | 0.8948 | 0.9703 | 0.0355 |
| PDPN       | 0.9038 | 1.1308 | 0.9336 | 0.9130 | 0.9703 | 0.0539 |
| EIF4A1     | 0.8055 | 1.2239 | 1.0620 | 0.7899 | 0.9703 | 0.1050 |
| LOC1001283 | 0.9988 | 0.9674 | 1.0322 | 0.8829 | 0.9703 | 0.0320 |
| OR10Z1     | 0.9465 | 1.0798 | 0.9542 | 0.9007 | 0.9703 | 0.0383 |
| LOC1001292 | 0.9289 | 1.0858 | 1.0184 | 0.8481 | 0.9703 | 0.0519 |
| PAPPA2     | 0.9662 | 1.0112 | 0.9648 | 0.9391 | 0.9703 | 0.0150 |
| ALPI       | 0.8857 | 1.1910 | 0.9548 | 0.8498 | 0.9703 | 0.0767 |
| LOC643904  | 0.8918 | 0.9608 | 1.0894 | 0.9394 | 0.9703 | 0.0422 |
| NAIP       | 0.9449 | 1.0491 | 0.9930 | 0.8943 | 0.9703 | 0.0331 |
| SPATA1     | 0.9754 | 0.9881 | 0.9532 | 0.9648 | 0.9703 | 0.0074 |
| LOC649395  | 0.9249 | 1.0626 | 0.9872 | 0.9067 | 0.9703 | 0.0353 |
| LOC643768  | 0.8607 | 1.0809 | 1.0613 | 0.8785 | 0.9703 | 0.0584 |
| LOC255649  | 0.9035 | 1.0431 | 0.9794 | 0.9553 | 0.9703 | 0.0290 |
| MYLK3      | 0.8970 | 1.0968 | 1.0273 | 0.8603 | 0.9703 | 0.0553 |
| LOC1001288 | 0.9780 | 1.0345 | 0.9638 | 0.9051 | 0.9703 | 0.0266 |
| IPMK       | 1.0164 | 1.1843 | 0.8775 | 0.8033 | 0.9703 | 0.0839 |
| HTR6       | 0.9994 | 1.1105 | 0.9305 | 0.8410 | 0.9704 | 0.0569 |
| HTRA3      | 0.8975 | 1.1091 | 0.9897 | 0.8852 | 0.9704 | 0.0518 |
| LOC649270  | 0.9248 | 1.0762 | 1.0327 | 0.8476 | 0.9704 | 0.0518 |
| SYNM       | 0.9610 | 1.1559 | 0.9388 | 0.8257 | 0.9704 | 0.0686 |
| LOC642120  | 0.8696 | 1.0031 | 1.1213 | 0.8874 | 0.9704 | 0.0584 |
| NTF4       | 0.9390 | 0.9900 | 1.0153 | 0.9372 | 0.9704 | 0.0194 |
| LOC727970  | 0.8908 | 1.1263 | 1.0311 | 0.8333 | 0.9704 | 0.0665 |
| LOC642178  | 0.8716 | 1.0577 | 0.9651 | 0.9871 | 0.9704 | 0.0384 |
| WISP1      | 0.9406 | 1.0714 | 0.9782 | 0.8912 | 0.9704 | 0.0381 |
| ABCA11     | 0.8202 | 1.3464 | 0.9833 | 0.7316 | 0.9704 | 0.1358 |
| LOC653876  | 0.8429 | 1.1851 | 0.9767 | 0.8768 | 0.9704 | 0.0770 |
| NPR2       | 0.9327 | 0.9907 | 1.0300 | 0.9282 | 0.9704 | 0.0244 |
| USH2A      | 0.9362 | 1.0654 | 0.9842 | 0.8957 | 0.9704 | 0.0365 |

|            |        |        |        |        |        |        |
|------------|--------|--------|--------|--------|--------|--------|
| ISLR       | 0.9128 | 1.0459 | 1.0139 | 0.9089 | 0.9704 | 0.0350 |
| LOC645200  | 0.9601 | 1.0101 | 1.0080 | 0.9033 | 0.9704 | 0.0252 |
| MIR515-2   | 1.0117 | 0.9522 | 1.0374 | 0.8803 | 0.9704 | 0.0349 |
| RHAG       | 0.9513 | 1.0276 | 0.9954 | 0.9073 | 0.9704 | 0.0262 |
| CDR1       | 0.9549 | 1.0442 | 0.9797 | 0.9028 | 0.9704 | 0.0294 |
| RNF208     | 0.8941 | 1.1139 | 0.9388 | 0.9348 | 0.9704 | 0.0489 |
| IGSF11     | 0.9265 | 1.0357 | 0.9711 | 0.9483 | 0.9704 | 0.0236 |
| LOC554226  | 0.9341 | 1.0243 | 1.0517 | 0.8715 | 0.9704 | 0.0415 |
| LOC647713  | 0.9487 | 0.9790 | 1.0259 | 0.9280 | 0.9704 | 0.0213 |
| KLHL34     | 0.9116 | 1.0277 | 1.0821 | 0.8603 | 0.9704 | 0.0511 |
| GDF2       | 0.9915 | 0.9872 | 1.0027 | 0.9003 | 0.9704 | 0.0236 |
| ZFY        | 0.9627 | 1.0933 | 0.9529 | 0.8728 | 0.9704 | 0.0456 |
| LOC730347  | 0.9159 | 1.0405 | 1.0420 | 0.8834 | 0.9704 | 0.0414 |
| LOC1001310 | 0.9349 | 0.9896 | 1.0556 | 0.9016 | 0.9704 | 0.0337 |
| LGALS13    | 0.9396 | 1.0521 | 1.0543 | 0.8358 | 0.9704 | 0.0523 |
| FATE1      | 0.8820 | 1.1291 | 1.0199 | 0.8508 | 0.9704 | 0.0644 |
| LOC1001283 | 0.9640 | 0.9598 | 1.0371 | 0.9208 | 0.9704 | 0.0243 |
| LOC399898  | 0.9818 | 1.0270 | 1.0049 | 0.8680 | 0.9704 | 0.0354 |
| LOC643556  | 0.8876 | 1.0902 | 1.0469 | 0.8570 | 0.9705 | 0.0577 |
| B3GALT2    | 0.9415 | 1.0618 | 0.9263 | 0.9521 | 0.9705 | 0.0309 |
| LOC643702  | 0.9217 | 1.0307 | 1.0335 | 0.8958 | 0.9705 | 0.0360 |
| MAGEA5     | 0.9126 | 0.9752 | 1.0505 | 0.9434 | 0.9705 | 0.0296 |
| PKIG       | 0.9499 | 1.0808 | 0.9000 | 0.9511 | 0.9705 | 0.0387 |
| RIMKLA     | 0.8890 | 1.1496 | 0.8867 | 0.9566 | 0.9705 | 0.0619 |
| ERH        | 0.6818 | 1.5062 | 1.0236 | 0.6703 | 0.9705 | 0.1965 |
| LOC642595  | 1.0207 | 1.0973 | 0.9617 | 0.8022 | 0.9705 | 0.0626 |
| CRHR2      | 0.9100 | 1.0852 | 0.9956 | 0.8911 | 0.9705 | 0.0445 |
| LOC727838  | 0.9749 | 0.9909 | 1.0517 | 0.8643 | 0.9705 | 0.0391 |
| NDUFC2     | 0.9802 | 1.0818 | 1.0545 | 0.7654 | 0.9705 | 0.0716 |
| LOC644209  | 0.9393 | 1.0530 | 0.9874 | 0.9023 | 0.9705 | 0.0326 |
| OR2T12     | 0.9550 | 1.0151 | 1.0335 | 0.8783 | 0.9705 | 0.0350 |
| MT1JP      | 0.8868 | 1.0959 | 0.9446 | 0.9548 | 0.9705 | 0.0444 |
| PLB1       | 0.9019 | 1.0462 | 1.0502 | 0.8837 | 0.9705 | 0.0450 |
| MIR2053    | 0.9770 | 1.0331 | 1.0011 | 0.8708 | 0.9705 | 0.0352 |
| GTPBP5     | 0.8189 | 1.1457 | 1.0600 | 0.8574 | 0.9705 | 0.0788 |
| NEU2       | 0.9422 | 1.0091 | 0.9513 | 0.9794 | 0.9705 | 0.0151 |
| LOC1001343 | 0.9552 | 1.0156 | 1.0441 | 0.8671 | 0.9705 | 0.0391 |
| MS4A13     | 0.9191 | 1.0545 | 0.9422 | 0.9661 | 0.9705 | 0.0296 |
| LOC646055  | 0.8631 | 1.0946 | 0.9526 | 0.9717 | 0.9705 | 0.0477 |
| LOC1001302 | 0.9521 | 1.0706 | 0.9885 | 0.8709 | 0.9705 | 0.0414 |
| UNC45B     | 0.9312 | 1.0507 | 0.9735 | 0.9268 | 0.9705 | 0.0287 |
| CYP2F1     | 0.9176 | 1.1228 | 0.9437 | 0.8981 | 0.9705 | 0.0516 |
| GALT       | 0.8681 | 1.3241 | 0.9515 | 0.7385 | 0.9706 | 0.1257 |
| LOC441644  | 0.9009 | 1.0288 | 1.0334 | 0.9192 | 0.9706 | 0.0351 |
| LOC652353  | 0.8861 | 1.0777 | 0.9485 | 0.9699 | 0.9706 | 0.0399 |
| LOC653354  | 0.8763 | 1.3205 | 0.9189 | 0.7666 | 0.9706 | 0.1210 |

|            |        |        |        |        |        |        |
|------------|--------|--------|--------|--------|--------|--------|
| ABO        | 1.0074 | 1.0305 | 0.9124 | 0.9320 | 0.9706 | 0.0286 |
| CYLD       | 0.9970 | 1.0862 | 0.9902 | 0.8090 | 0.9706 | 0.0581 |
| LOC1001313 | 0.9447 | 1.1196 | 0.9952 | 0.8228 | 0.9706 | 0.0615 |
| LOC1001313 | 0.8867 | 1.0640 | 0.9726 | 0.9590 | 0.9706 | 0.0364 |
| MIR181B1   | 0.8969 | 1.0864 | 0.9406 | 0.9584 | 0.9706 | 0.0407 |
| DMWD       | 0.7998 | 1.1999 | 1.0309 | 0.8517 | 0.9706 | 0.0911 |
| CCDC48     | 0.9584 | 1.1489 | 1.0107 | 0.7644 | 0.9706 | 0.0796 |
| LOC400099  | 0.9191 | 1.0276 | 0.9544 | 0.9812 | 0.9706 | 0.0229 |
| GTF2F1     | 0.9229 | 1.1858 | 0.9134 | 0.8603 | 0.9706 | 0.0730 |
| SPATA16    | 0.8322 | 1.1372 | 0.9482 | 0.9647 | 0.9706 | 0.0629 |
| LOC652667  | 0.9959 | 1.0259 | 1.0394 | 0.8212 | 0.9706 | 0.0506 |
| MRAP       | 0.8963 | 1.1108 | 1.0118 | 0.8635 | 0.9706 | 0.0565 |
| SPRY2      | 0.9869 | 1.0304 | 0.9625 | 0.9026 | 0.9706 | 0.0266 |
| PDXDC2     | 0.9017 | 1.1477 | 0.9756 | 0.8574 | 0.9706 | 0.0639 |
| LOC442240  | 0.9029 | 1.0650 | 0.9794 | 0.9351 | 0.9706 | 0.0352 |
| LOC390424  | 0.9172 | 1.0461 | 0.9898 | 0.9294 | 0.9706 | 0.0297 |
| LOC644335  | 0.9415 | 1.1757 | 0.9351 | 0.8302 | 0.9706 | 0.0730 |
| HAP1       | 0.9137 | 1.0747 | 1.0169 | 0.8772 | 0.9706 | 0.0456 |
| UBE2CBP    | 0.9336 | 1.1015 | 0.9690 | 0.8784 | 0.9706 | 0.0474 |
| GPR155     | 0.8744 | 1.0927 | 1.0181 | 0.8973 | 0.9706 | 0.0515 |
| LOC220115  | 0.9155 | 1.0986 | 0.9881 | 0.8803 | 0.9706 | 0.0482 |
| KDELC2     | 0.9757 | 0.9879 | 1.0170 | 0.9020 | 0.9706 | 0.0245 |
| LOC644248  | 0.8452 | 1.0814 | 1.0314 | 0.9246 | 0.9706 | 0.0531 |
| LOC440820  | 1.0485 | 1.0117 | 0.9065 | 0.9158 | 0.9706 | 0.0352 |
| LOC260339  | 0.9428 | 1.0887 | 1.0071 | 0.8439 | 0.9706 | 0.0517 |
| MAB21L2    | 0.9457 | 1.0307 | 0.9465 | 0.9596 | 0.9706 | 0.0203 |
| PTRF       | 0.7649 | 1.3797 | 0.9381 | 0.7999 | 0.9706 | 0.1414 |
| LOC390806  | 0.9361 | 1.0241 | 1.0621 | 0.8603 | 0.9706 | 0.0453 |
| PTPRCAP    | 0.9410 | 1.0115 | 0.9487 | 0.9814 | 0.9706 | 0.0162 |
| DYX1C1     | 0.9047 | 1.0299 | 1.0692 | 0.8789 | 0.9706 | 0.0465 |
| MIR637     | 0.9462 | 1.0914 | 0.9994 | 0.8456 | 0.9706 | 0.0513 |
| FLJ42133   | 0.9160 | 1.0233 | 1.0299 | 0.9134 | 0.9706 | 0.0323 |
| MIR23A     | 0.9366 | 1.0774 | 0.9396 | 0.9290 | 0.9707 | 0.0357 |
| SLC16A12   | 0.7894 | 1.3974 | 0.9632 | 0.7326 | 0.9707 | 0.1505 |
| KRT18P42   | 0.9488 | 1.0374 | 1.0724 | 0.8240 | 0.9707 | 0.0554 |
| ERCC-00022 | 0.9555 | 1.0390 | 0.9696 | 0.9186 | 0.9707 | 0.0252 |
| PREP       | 0.7449 | 1.4520 | 0.9324 | 0.7534 | 0.9707 | 0.1662 |
| LOC1001302 | 0.9731 | 1.0432 | 0.9442 | 0.9222 | 0.9707 | 0.0263 |
| OR52A5     | 0.9429 | 1.0561 | 0.9882 | 0.8955 | 0.9707 | 0.0342 |
| CLDN14     | 0.8763 | 1.1250 | 1.0472 | 0.8342 | 0.9707 | 0.0690 |
| C3orf57    | 0.8750 | 1.0736 | 1.0236 | 0.9106 | 0.9707 | 0.0467 |
| FLJ39080   | 0.9422 | 1.0641 | 1.0059 | 0.8706 | 0.9707 | 0.0416 |
| ZNF487     | 0.9569 | 1.0716 | 0.9907 | 0.8636 | 0.9707 | 0.0430 |
| LOC731040  | 0.9520 | 1.1215 | 0.9276 | 0.8817 | 0.9707 | 0.0523 |
| INPP5F     | 0.8769 | 1.2069 | 0.9185 | 0.8806 | 0.9707 | 0.0793 |
| LOC442142  | 0.9992 | 1.0343 | 0.8988 | 0.9505 | 0.9707 | 0.0295 |



|             |        |        |        |        |        |        |
|-------------|--------|--------|--------|--------|--------|--------|
| PORCN       | 0.8843 | 1.0983 | 0.9795 | 0.9208 | 0.9707 | 0.0468 |
| PKLR        | 0.9615 | 1.0060 | 1.0620 | 0.8534 | 0.9707 | 0.0442 |
| LOC1001309  | 0.9628 | 1.0606 | 1.0015 | 0.8580 | 0.9707 | 0.0426 |
| LOC1001308  | 0.8672 | 1.1776 | 0.9829 | 0.8553 | 0.9707 | 0.0747 |
| ALDH7A1     | 0.8618 | 1.1111 | 1.0362 | 0.8738 | 0.9707 | 0.0614 |
| NBPF1       | 0.8594 | 1.0665 | 1.0821 | 0.8751 | 0.9707 | 0.0599 |
| LOC1001317  | 1.0200 | 0.9265 | 1.0886 | 0.8478 | 0.9707 | 0.0527 |
| SCG2        | 0.9645 | 1.0947 | 1.0225 | 0.8013 | 0.9708 | 0.0624 |
| CCDC144NL   | 0.9883 | 1.0911 | 0.8201 | 0.9835 | 0.9708 | 0.0560 |
| LOC1001324  | 0.9730 | 0.9984 | 0.9832 | 0.9284 | 0.9708 | 0.0150 |
| LOC650961   | 0.9380 | 1.0948 | 0.9191 | 0.9312 | 0.9708 | 0.0415 |
| LILRA5      | 0.9928 | 1.0727 | 0.8954 | 0.9222 | 0.9708 | 0.0397 |
| ACAN        | 0.8261 | 1.0502 | 0.9908 | 1.0161 | 0.9708 | 0.0497 |
| HSPB3       | 1.0304 | 1.1172 | 0.8420 | 0.8935 | 0.9708 | 0.0630 |
| LOC646926   | 0.9637 | 1.0590 | 0.9397 | 0.9206 | 0.9708 | 0.0307 |
| LOC649396   | 0.8788 | 1.0909 | 1.0059 | 0.9075 | 0.9708 | 0.0484 |
| PTGDR       | 0.8607 | 1.0497 | 1.0551 | 0.9177 | 0.9708 | 0.0485 |
| LOC728316   | 0.9969 | 1.1733 | 0.8585 | 0.8545 | 0.9708 | 0.0752 |
| LOC729080   | 1.0180 | 1.0400 | 0.9342 | 0.8910 | 0.9708 | 0.0350 |
| PTPRS       | 0.8978 | 1.0746 | 0.9629 | 0.9480 | 0.9708 | 0.0373 |
| FLJ44112    | 0.8802 | 1.1077 | 1.0077 | 0.8876 | 0.9708 | 0.0542 |
| LOC1001318  | 0.9865 | 1.2545 | 0.8986 | 0.7436 | 0.9708 | 0.1071 |
| ZSWIM5      | 0.9856 | 1.0814 | 0.9813 | 0.8350 | 0.9708 | 0.0508 |
| LOC206227   | 0.8952 | 1.0836 | 0.9793 | 0.9251 | 0.9708 | 0.0414 |
| LOC1001328  | 0.8964 | 1.0856 | 1.0497 | 0.8516 | 0.9708 | 0.0571 |
| LOC285359   | 0.9052 | 1.0205 | 1.0191 | 0.9384 | 0.9708 | 0.0291 |
| FAM153C     | 0.9443 | 0.9865 | 1.0068 | 0.9456 | 0.9708 | 0.0155 |
| LOC644421   | 0.9773 | 1.0497 | 0.9645 | 0.8918 | 0.9708 | 0.0323 |
| LOC442308   | 0.9437 | 1.0516 | 1.0091 | 0.8789 | 0.9708 | 0.0378 |
| PPID        | 0.9346 | 1.0416 | 1.0168 | 0.8903 | 0.9708 | 0.0353 |
| DPP10       | 0.9703 | 1.0299 | 0.9896 | 0.8934 | 0.9708 | 0.0286 |
| ZNF683      | 0.9254 | 1.0779 | 0.9755 | 0.9045 | 0.9708 | 0.0387 |
| TCTE3       | 0.9599 | 0.9826 | 1.0212 | 0.9196 | 0.9708 | 0.0213 |
| FLJ32011    | 0.8345 | 1.0016 | 1.1405 | 0.9067 | 0.9708 | 0.0661 |
| ARPC2       | 0.8016 | 1.2376 | 1.0598 | 0.7844 | 0.9708 | 0.1090 |
| KRT39       | 0.9638 | 1.0437 | 0.9908 | 0.8850 | 0.9708 | 0.0331 |
| LOC399959   | 0.9819 | 0.9804 | 0.9759 | 0.9451 | 0.9708 | 0.0087 |
| LOC1001323  | 0.8383 | 1.1345 | 1.0659 | 0.8447 | 0.9708 | 0.0760 |
| RP11-49G10. | 0.9290 | 1.2223 | 0.8546 | 0.8775 | 0.9709 | 0.0853 |
| LOC1001324  | 0.9244 | 1.0439 | 0.9823 | 0.9327 | 0.9709 | 0.0275 |
| HAAO        | 0.9803 | 1.0995 | 0.9840 | 0.8196 | 0.9709 | 0.0575 |
| EMILIN3     | 0.9175 | 1.0332 | 0.9854 | 0.9473 | 0.9709 | 0.0250 |
| LOC1001329  | 0.8667 | 1.1204 | 0.9798 | 0.9167 | 0.9709 | 0.0549 |
| LOC646779   | 1.1120 | 0.9556 | 0.9628 | 0.8532 | 0.9709 | 0.0533 |
| LOC646509   | 0.9321 | 1.1539 | 1.0579 | 0.7396 | 0.9709 | 0.0895 |
| BAGE        | 0.8916 | 1.1708 | 0.9805 | 0.8406 | 0.9709 | 0.0726 |

|            |        |        |        |        |        |        |
|------------|--------|--------|--------|--------|--------|--------|
| PLD6       | 1.0120 | 0.9951 | 0.9633 | 0.9132 | 0.9709 | 0.0217 |
| MGAT3      | 0.9510 | 0.9864 | 0.9725 | 0.9738 | 0.9709 | 0.0073 |
| LOC729212  | 0.9062 | 1.1310 | 0.9727 | 0.8736 | 0.9709 | 0.0572 |
| EMCN       | 0.9737 | 1.0279 | 0.9992 | 0.8828 | 0.9709 | 0.0314 |
| LOC1001328 | 0.8797 | 0.9895 | 0.9975 | 1.0170 | 0.9709 | 0.0309 |
| LIN7C      | 0.8685 | 1.2261 | 1.0693 | 0.7198 | 0.9709 | 0.1112 |
| MRAS       | 0.7358 | 1.1474 | 1.1108 | 0.8897 | 0.9709 | 0.0969 |
| ERCC-00163 | 0.8714 | 1.1343 | 0.9482 | 0.9298 | 0.9709 | 0.0569 |
| FBLN7      | 0.9094 | 1.1706 | 0.9977 | 0.8059 | 0.9709 | 0.0772 |
| ITIH4      | 0.9320 | 1.0643 | 0.9496 | 0.9378 | 0.9709 | 0.0314 |
| POU5F2     | 1.0134 | 0.9957 | 1.0046 | 0.8700 | 0.9709 | 0.0338 |
| LOC391135  | 0.8788 | 0.9982 | 1.0793 | 0.9275 | 0.9709 | 0.0437 |
| PIP5KL1    | 0.9846 | 0.9698 | 1.0486 | 0.8808 | 0.9709 | 0.0346 |
| C3orf36    | 1.0293 | 1.1061 | 0.9530 | 0.7955 | 0.9710 | 0.0663 |
| LOC728694  | 0.8977 | 1.1551 | 0.9023 | 0.9287 | 0.9710 | 0.0618 |
| DEFB127    | 0.9446 | 0.9283 | 1.1108 | 0.9001 | 0.9710 | 0.0475 |
| CD200R1    | 0.9000 | 1.0312 | 1.0708 | 0.8818 | 0.9710 | 0.0471 |
| LOC645485  | 0.9473 | 1.0168 | 1.0178 | 0.9019 | 0.9710 | 0.0283 |
| GSTM3      | 0.9455 | 1.1118 | 0.9883 | 0.8383 | 0.9710 | 0.0566 |
| CDC14C     | 0.7938 | 1.0867 | 1.1222 | 0.8812 | 0.9710 | 0.0794 |
| LOC344328  | 0.8965 | 1.0871 | 0.9713 | 0.9291 | 0.9710 | 0.0416 |
| SLFN11     | 0.8142 | 1.0612 | 1.0979 | 0.9107 | 0.9710 | 0.0661 |
| LOC389386  | 0.9290 | 1.1909 | 0.9598 | 0.8042 | 0.9710 | 0.0807 |
| MLF1       | 0.8768 | 1.1693 | 0.9415 | 0.8964 | 0.9710 | 0.0675 |
| LOC652575  | 0.9369 | 1.0868 | 1.0423 | 0.8180 | 0.9710 | 0.0599 |
| SND1       | 0.8598 | 1.4323 | 0.9225 | 0.6694 | 0.9710 | 0.1629 |
| MIR562     | 0.9030 | 1.0432 | 1.0055 | 0.9323 | 0.9710 | 0.0323 |
| CACNA1F    | 0.9548 | 1.0650 | 0.9595 | 0.9047 | 0.9710 | 0.0337 |
| CSMD2      | 0.8587 | 1.0995 | 0.9905 | 0.9354 | 0.9710 | 0.0506 |
| LOC1001335 | 0.9518 | 1.0777 | 0.9550 | 0.8996 | 0.9710 | 0.0378 |
| LOC642520  | 0.8777 | 1.0752 | 1.0070 | 0.9242 | 0.9710 | 0.0438 |
| SLC35E2    | 1.0042 | 1.1187 | 0.9763 | 0.7849 | 0.9710 | 0.0693 |
| SNORD114-4 | 0.9569 | 1.1133 | 0.9544 | 0.8594 | 0.9710 | 0.0526 |
| C3orf14    | 0.9032 | 1.0488 | 0.9944 | 0.9377 | 0.9710 | 0.0320 |
| ADAM5      | 0.8819 | 1.0612 | 1.0250 | 0.9160 | 0.9710 | 0.0429 |
| HELB       | 0.8727 | 1.1252 | 0.9134 | 0.9730 | 0.9710 | 0.0554 |
| LOC647215  | 0.9564 | 1.1287 | 1.0150 | 0.7840 | 0.9710 | 0.0719 |
| LOC400509  | 0.8868 | 1.1676 | 0.9655 | 0.8643 | 0.9710 | 0.0690 |
| HIGD1B     | 0.9752 | 0.9583 | 0.9547 | 0.9960 | 0.9710 | 0.0094 |
| PDLIM2     | 0.9472 | 1.0596 | 1.0435 | 0.8339 | 0.9711 | 0.0520 |
| SHISA3     | 0.8963 | 1.1447 | 1.0077 | 0.8356 | 0.9711 | 0.0680 |
| LOC644519  | 0.9200 | 0.9470 | 1.0960 | 0.9213 | 0.9711 | 0.0421 |
| LCN8       | 0.9334 | 1.0591 | 0.9572 | 0.9345 | 0.9711 | 0.0298 |
| LOC641982  | 0.9330 | 1.0743 | 1.0482 | 0.8288 | 0.9711 | 0.0565 |
| MRGPRX2    | 0.9329 | 1.1044 | 0.9411 | 0.9059 | 0.9711 | 0.0451 |
| LOC283682  | 0.9763 | 1.0629 | 0.9295 | 0.9157 | 0.9711 | 0.0332 |

|            |        |        |        |        |        |        |
|------------|--------|--------|--------|--------|--------|--------|
| LOC643331  | 0.8565 | 1.1332 | 1.0379 | 0.8567 | 0.9711 | 0.0689 |
| KLF16      | 1.0365 | 0.9870 | 0.9623 | 0.8985 | 0.9711 | 0.0287 |
| DNAJC30    | 0.7976 | 1.2895 | 0.9849 | 0.8124 | 0.9711 | 0.1143 |
| MTMR7      | 0.9685 | 1.1068 | 0.9233 | 0.8859 | 0.9711 | 0.0483 |
| SUMO1      | 1.0054 | 1.0186 | 0.9812 | 0.8792 | 0.9711 | 0.0316 |
| ZNF502     | 0.9890 | 1.1087 | 0.9835 | 0.8033 | 0.9711 | 0.0630 |
| LOC648629  | 0.9492 | 1.1067 | 0.9634 | 0.8652 | 0.9711 | 0.0501 |
| KRT2       | 0.9691 | 0.9595 | 1.0543 | 0.9016 | 0.9711 | 0.0315 |
| LOC651454  | 1.0214 | 1.0227 | 0.9550 | 0.8855 | 0.9711 | 0.0326 |
| NHS        | 0.9472 | 1.0657 | 0.9854 | 0.8862 | 0.9711 | 0.0376 |
| LOC644619  | 0.9045 | 1.1804 | 0.9885 | 0.8112 | 0.9711 | 0.0786 |
| WDR1       | 0.8997 | 1.3276 | 1.0082 | 0.6491 | 0.9711 | 0.1406 |
| LOC651115  | 0.8574 | 1.1593 | 0.9659 | 0.9020 | 0.9712 | 0.0666 |
| NT5C1B     | 0.9490 | 1.0965 | 0.9769 | 0.8623 | 0.9712 | 0.0484 |
| ABCC9      | 0.9143 | 1.1287 | 0.9955 | 0.8462 | 0.9712 | 0.0607 |
| SNORD11    | 0.9957 | 1.0876 | 0.9988 | 0.8026 | 0.9712 | 0.0601 |
| C3orf42    | 0.9190 | 1.0661 | 0.9550 | 0.9445 | 0.9712 | 0.0325 |
| LOC1001328 | 0.8760 | 1.0206 | 1.0101 | 0.9780 | 0.9712 | 0.0330 |
| NAPSB      | 0.9657 | 0.9490 | 1.0833 | 0.8866 | 0.9712 | 0.0411 |
| A1CF       | 0.9054 | 1.0555 | 0.9999 | 0.9240 | 0.9712 | 0.0347 |
| C2orf55    | 0.9172 | 1.0153 | 0.9998 | 0.9524 | 0.9712 | 0.0224 |
| PAX3       | 0.9174 | 1.0006 | 1.0563 | 0.9103 | 0.9712 | 0.0350 |
| LOC646825  | 0.8417 | 1.0234 | 0.9924 | 1.0272 | 0.9712 | 0.0438 |
| MIR154     | 0.9768 | 1.0785 | 0.9780 | 0.8514 | 0.9712 | 0.0465 |
| LRRC8C     | 0.9803 | 0.9601 | 1.0007 | 0.9437 | 0.9712 | 0.0124 |
| CYP2S1     | 0.9051 | 1.0483 | 0.9771 | 0.9543 | 0.9712 | 0.0298 |
| SMTN       | 1.0083 | 1.0879 | 0.9525 | 0.8361 | 0.9712 | 0.0529 |
| LOC1001315 | 0.8881 | 1.0510 | 0.9776 | 0.9681 | 0.9712 | 0.0333 |
| ERMN       | 0.9513 | 1.0209 | 0.9280 | 0.9846 | 0.9712 | 0.0202 |
| AHSP       | 0.8517 | 1.1461 | 1.0379 | 0.8492 | 0.9712 | 0.0732 |
| LOC388503  | 0.9640 | 0.9814 | 1.0300 | 0.9094 | 0.9712 | 0.0249 |
| LOC728847  | 0.8638 | 1.0492 | 1.0692 | 0.9026 | 0.9712 | 0.0516 |
| VHLL       | 0.9309 | 1.0001 | 1.0004 | 0.9535 | 0.9712 | 0.0174 |
| LOC650147  | 0.9062 | 1.0340 | 1.0605 | 0.8842 | 0.9712 | 0.0444 |
| SNED1      | 0.9784 | 1.0519 | 0.9511 | 0.9035 | 0.9712 | 0.0310 |
| LOC1001332 | 0.9579 | 1.1080 | 0.9220 | 0.8970 | 0.9712 | 0.0473 |
| CD300E     | 0.9200 | 1.1607 | 0.9750 | 0.8292 | 0.9712 | 0.0700 |
| MGC16025   | 0.9612 | 1.0432 | 0.9380 | 0.9426 | 0.9712 | 0.0245 |
| NPY1R      | 1.0228 | 1.0638 | 0.8823 | 0.9160 | 0.9712 | 0.0430 |
| SH2D7      | 0.9783 | 1.0561 | 1.0017 | 0.8489 | 0.9712 | 0.0439 |
| C10orf72   | 0.8950 | 1.1064 | 0.9540 | 0.9296 | 0.9712 | 0.0466 |
| LOC645032  | 0.9566 | 1.0283 | 0.9695 | 0.9307 | 0.9713 | 0.0207 |
| MIR1265    | 0.9195 | 1.0961 | 0.9370 | 0.9325 | 0.9713 | 0.0418 |
| LOC1001301 | 1.0315 | 1.0268 | 0.9486 | 0.8781 | 0.9713 | 0.0364 |
| PTGR2      | 0.8829 | 1.2006 | 0.9340 | 0.8675 | 0.9713 | 0.0778 |
| LOC729260  | 0.8589 | 0.9429 | 1.1164 | 0.9669 | 0.9713 | 0.0536 |

|            |        |        |        |        |        |        |
|------------|--------|--------|--------|--------|--------|--------|
| LOC645681  | 0.8767 | 0.9878 | 1.1262 | 0.8944 | 0.9713 | 0.0571 |
| LOC648256  | 0.9747 | 1.0855 | 0.9903 | 0.8346 | 0.9713 | 0.0517 |
| PHF20L1    | 0.9503 | 1.1517 | 0.9130 | 0.8700 | 0.9713 | 0.0624 |
| SMAD9      | 0.9614 | 0.9871 | 1.0652 | 0.8715 | 0.9713 | 0.0399 |
| NBPF9      | 0.9613 | 1.0979 | 0.9580 | 0.8679 | 0.9713 | 0.0474 |
| RASIP1     | 0.8068 | 1.1263 | 1.1491 | 0.8029 | 0.9713 | 0.0962 |
| MIR2278    | 0.7707 | 1.2270 | 1.0224 | 0.8650 | 0.9713 | 0.0998 |
| LOC645941  | 1.0003 | 1.0989 | 0.8812 | 0.9047 | 0.9713 | 0.0497 |
| CNTN1      | 0.9729 | 1.0835 | 0.9422 | 0.8866 | 0.9713 | 0.0414 |
| KLK4       | 0.7515 | 1.3248 | 0.9825 | 0.8263 | 0.9713 | 0.1273 |
| TRO        | 0.8888 | 1.0967 | 1.0356 | 0.8640 | 0.9713 | 0.0564 |
| CAV3       | 0.9490 | 1.0054 | 0.9876 | 0.9433 | 0.9713 | 0.0150 |
| LOC1001341 | 0.8826 | 1.0802 | 1.0253 | 0.8971 | 0.9713 | 0.0484 |
| LOC643576  | 1.0589 | 0.9940 | 0.9950 | 0.8374 | 0.9713 | 0.0472 |
| ISM2       | 0.9194 | 1.1932 | 0.8674 | 0.9053 | 0.9713 | 0.0748 |
| MAP1D      | 0.9474 | 1.1287 | 0.9656 | 0.8435 | 0.9713 | 0.0590 |
| FAM151B    | 0.8353 | 1.2324 | 1.0021 | 0.8154 | 0.9713 | 0.0966 |
| KCNJ3      | 0.9095 | 1.0150 | 1.0492 | 0.9114 | 0.9713 | 0.0358 |
| LOC730074  | 0.8088 | 1.3467 | 1.0439 | 0.6859 | 0.9713 | 0.1455 |
| RASL10B    | 1.0474 | 1.0358 | 0.9189 | 0.8832 | 0.9713 | 0.0413 |
| AQP7       | 0.9475 | 1.0097 | 0.9650 | 0.9631 | 0.9713 | 0.0134 |
| HDC        | 0.9169 | 0.9940 | 1.0731 | 0.9013 | 0.9713 | 0.0395 |
| LOC642017  | 0.7284 | 1.3380 | 0.7806 | 1.0384 | 0.9713 | 0.1397 |
| CCDC63     | 0.8915 | 1.1049 | 0.9828 | 0.9061 | 0.9713 | 0.0488 |
| LOC729078  | 0.9972 | 1.0200 | 1.0268 | 0.8414 | 0.9713 | 0.0438 |
| CASP8AP2   | 0.8882 | 1.0755 | 1.0150 | 0.9067 | 0.9713 | 0.0446 |
| OSBPL11    | 0.9030 | 1.1070 | 0.9876 | 0.8878 | 0.9713 | 0.0503 |
| KIAA1024L  | 0.8624 | 1.1160 | 0.9294 | 0.9775 | 0.9714 | 0.0537 |
| LRRC8E     | 0.8440 | 1.0389 | 1.1553 | 0.8471 | 0.9714 | 0.0764 |
| LOC1001296 | 0.9659 | 1.0424 | 0.9159 | 0.9613 | 0.9714 | 0.0262 |
| LOC651463  | 0.9077 | 1.0787 | 0.9793 | 0.9196 | 0.9714 | 0.0391 |
| LIPE       | 0.9537 | 1.0689 | 0.9512 | 0.9116 | 0.9714 | 0.0339 |
| MIR125B2   | 0.8426 | 1.0958 | 1.1313 | 0.8157 | 0.9714 | 0.0826 |
| FSHB       | 0.9184 | 1.1115 | 0.9595 | 0.8961 | 0.9714 | 0.0485 |
| SUSD1      | 0.9318 | 0.9931 | 1.0610 | 0.8996 | 0.9714 | 0.0356 |
| TMSL3      | 0.9970 | 1.0904 | 1.0726 | 0.7255 | 0.9714 | 0.0844 |
| SNORD111   | 0.9698 | 1.0260 | 1.0031 | 0.8865 | 0.9714 | 0.0305 |
| PYGO1      | 0.8710 | 1.0460 | 1.0037 | 0.9649 | 0.9714 | 0.0373 |
| SNORD71    | 0.9187 | 0.9889 | 1.0396 | 0.9383 | 0.9714 | 0.0271 |
| LOC391656  | 0.8917 | 1.1265 | 1.2124 | 0.6550 | 0.9714 | 0.1254 |
| LOC644155  | 0.8701 | 1.1206 | 0.9241 | 0.9708 | 0.9714 | 0.0538 |
| CC2D2B     | 0.9260 | 1.0037 | 1.0148 | 0.9411 | 0.9714 | 0.0222 |
| LOC653539  | 0.9004 | 1.0687 | 0.9888 | 0.9276 | 0.9714 | 0.0373 |
| LOC644536  | 0.8510 | 1.1331 | 1.0125 | 0.8890 | 0.9714 | 0.0640 |
| LOC643932  | 1.1017 | 1.1100 | 0.9031 | 0.7708 | 0.9714 | 0.0822 |
| SLAMF8     | 0.9186 | 1.1509 | 0.9122 | 0.9040 | 0.9714 | 0.0599 |

|            |        |        |        |        |        |        |
|------------|--------|--------|--------|--------|--------|--------|
| LOC440061  | 0.8691 | 1.0720 | 1.0458 | 0.8988 | 0.9714 | 0.0512 |
| LOC399937  | 0.9185 | 1.0629 | 1.0233 | 0.8809 | 0.9714 | 0.0429 |
| SCXA       | 0.9021 | 1.1849 | 0.9480 | 0.8507 | 0.9714 | 0.0739 |
| FAM115B    | 0.8412 | 1.1231 | 1.0339 | 0.8875 | 0.9714 | 0.0651 |
| KBTBD12    | 0.8705 | 1.0186 | 1.0698 | 0.9269 | 0.9714 | 0.0448 |
| LOC727914  | 0.8955 | 1.1564 | 1.0024 | 0.8313 | 0.9714 | 0.0711 |
| SETD7      | 0.8731 | 1.1066 | 1.0794 | 0.8266 | 0.9714 | 0.0711 |
| ZNF197     | 0.9093 | 1.1708 | 1.0069 | 0.7988 | 0.9715 | 0.0789 |
| LOC730818  | 0.8333 | 1.0904 | 1.0460 | 0.9161 | 0.9715 | 0.0591 |
| LOC647542  | 0.9602 | 1.0033 | 0.9767 | 0.9457 | 0.9715 | 0.0124 |
| FAM26E     | 0.8168 | 1.2019 | 0.9785 | 0.8887 | 0.9715 | 0.0836 |
| OR6F1      | 0.9118 | 1.0989 | 1.0410 | 0.8342 | 0.9715 | 0.0602 |
| FCGRT      | 0.9378 | 1.0442 | 1.0296 | 0.8742 | 0.9715 | 0.0401 |
| SSTR3      | 0.9508 | 1.0831 | 0.9405 | 0.9115 | 0.9715 | 0.0381 |
| DCXR       | 0.8274 | 1.2878 | 1.0079 | 0.7629 | 0.9715 | 0.1175 |
| LOC644150  | 0.9790 | 1.0087 | 1.0372 | 0.8611 | 0.9715 | 0.0387 |
| LOC644982  | 0.9441 | 1.0113 | 0.9910 | 0.9396 | 0.9715 | 0.0176 |
| TRMT2A     | 0.8706 | 1.1118 | 1.0453 | 0.8582 | 0.9715 | 0.0633 |
| LOC645551  | 0.9423 | 1.0469 | 0.9861 | 0.9107 | 0.9715 | 0.0295 |
| LOC402715  | 1.0317 | 1.1224 | 0.8945 | 0.8374 | 0.9715 | 0.0647 |
| HLX        | 0.8749 | 1.0977 | 1.1023 | 0.8111 | 0.9715 | 0.0753 |
| LOC728364  | 0.9509 | 1.0525 | 1.0073 | 0.8753 | 0.9715 | 0.0382 |
| LOC1001328 | 0.9414 | 1.0698 | 1.0877 | 0.7871 | 0.9715 | 0.0696 |
| SRRM5      | 0.8795 | 1.1018 | 1.0548 | 0.8499 | 0.9715 | 0.0627 |
| LOC283029  | 1.0304 | 1.0109 | 0.9908 | 0.8540 | 0.9715 | 0.0400 |
| AGAP11     | 1.0134 | 0.9526 | 1.0073 | 0.9128 | 0.9715 | 0.0239 |
| LOC653588  | 0.9061 | 1.1351 | 1.0283 | 0.8165 | 0.9715 | 0.0697 |
| LOC1001317 | 0.7330 | 1.1283 | 1.0341 | 0.9907 | 0.9715 | 0.0845 |
| LOC1001295 | 0.9279 | 1.0074 | 1.0487 | 0.9020 | 0.9715 | 0.0341 |
| DGKG       | 1.0021 | 1.0157 | 0.9771 | 0.8912 | 0.9715 | 0.0279 |
| CYP2U1     | 0.9850 | 1.0916 | 0.9988 | 0.8108 | 0.9715 | 0.0586 |
| ORM2       | 1.1790 | 0.9986 | 0.9140 | 0.7945 | 0.9715 | 0.0808 |
| AGER       | 0.9688 | 1.0727 | 0.9749 | 0.8697 | 0.9715 | 0.0415 |
| LOC441052  | 0.9415 | 1.0652 | 0.9180 | 0.9614 | 0.9715 | 0.0325 |
| PCBP2      | 0.7920 | 1.3042 | 0.9994 | 0.7906 | 0.9715 | 0.1213 |
| ZBTB6      | 0.9355 | 1.1621 | 0.9839 | 0.8047 | 0.9715 | 0.0739 |
| LOC653148  | 0.7815 | 1.0658 | 1.0595 | 0.9793 | 0.9716 | 0.0663 |
| CCT8L1     | 0.9530 | 1.1046 | 0.9784 | 0.8502 | 0.9716 | 0.0523 |
| TIMP4      | 1.0237 | 1.0002 | 0.9452 | 0.9172 | 0.9716 | 0.0245 |
| LOC650823  | 0.9042 | 1.0196 | 1.0287 | 0.9337 | 0.9716 | 0.0310 |
| TMEM84     | 0.9425 | 0.9541 | 0.9961 | 0.9935 | 0.9716 | 0.0136 |
| LOC442572  | 0.9893 | 1.0950 | 0.9485 | 0.8534 | 0.9716 | 0.0500 |
| LOC1001302 | 0.9213 | 1.1557 | 0.9721 | 0.8372 | 0.9716 | 0.0674 |
| MIR623     | 0.8110 | 1.1992 | 0.9950 | 0.8811 | 0.9716 | 0.0848 |
| LOC1001331 | 0.9829 | 1.0385 | 0.9274 | 0.9375 | 0.9716 | 0.0254 |
| LOC344167  | 0.9137 | 1.1640 | 0.9551 | 0.8534 | 0.9716 | 0.0675 |

|            |        |        |        |        |        |        |
|------------|--------|--------|--------|--------|--------|--------|
| GPR45      | 0.9949 | 0.9423 | 1.0533 | 0.8958 | 0.9716 | 0.0339 |
| ACSS1      | 0.9984 | 0.9997 | 1.1095 | 0.7787 | 0.9716 | 0.0694 |
| LOC648025  | 0.9590 | 0.9565 | 1.0723 | 0.8986 | 0.9716 | 0.0363 |
| C1orf133   | 1.0188 | 1.0452 | 0.9439 | 0.8785 | 0.9716 | 0.0377 |
| FLJ16793   | 0.9010 | 1.1689 | 0.9038 | 0.9126 | 0.9716 | 0.0658 |
| SCARNA12   | 0.9049 | 1.1520 | 1.0123 | 0.8172 | 0.9716 | 0.0722 |
| SELO       | 0.8780 | 1.2182 | 1.0115 | 0.7787 | 0.9716 | 0.0950 |
| LOC653596  | 0.9702 | 1.0474 | 0.9738 | 0.8951 | 0.9716 | 0.0311 |
| UCN2       | 0.9584 | 1.0114 | 1.0472 | 0.8694 | 0.9716 | 0.0386 |
| ERCC-00145 | 0.9970 | 1.0083 | 0.9559 | 0.9252 | 0.9716 | 0.0191 |
| GTSF1L     | 0.8967 | 1.0861 | 0.9405 | 0.9632 | 0.9716 | 0.0406 |
| LOC441752  | 0.9951 | 1.0087 | 1.0208 | 0.8619 | 0.9716 | 0.0369 |
| CD33       | 0.8977 | 1.0880 | 0.9484 | 0.9524 | 0.9716 | 0.0408 |
| MFSD7      | 1.0778 | 1.0386 | 0.9501 | 0.8201 | 0.9716 | 0.0572 |
| WFIKKN1    | 0.9208 | 1.0238 | 0.9740 | 0.9680 | 0.9716 | 0.0211 |
| LOC649990  | 0.9056 | 1.2415 | 0.9550 | 0.7844 | 0.9716 | 0.0968 |
| SH3TC2     | 0.9668 | 1.0574 | 0.9483 | 0.9140 | 0.9716 | 0.0306 |
| SNORA36B   | 0.8499 | 1.0020 | 1.0434 | 0.9912 | 0.9716 | 0.0421 |
| RPL27      | 0.8669 | 1.0205 | 1.1286 | 0.8705 | 0.9716 | 0.0634 |
| LOC1001338 | 0.8688 | 1.0867 | 1.0682 | 0.8629 | 0.9716 | 0.0612 |
| LOC728773  | 0.9286 | 1.0617 | 1.0333 | 0.8630 | 0.9716 | 0.0462 |
| FGG        | 0.8855 | 1.0215 | 1.0411 | 0.9385 | 0.9716 | 0.0363 |
| FLJ36644   | 0.8661 | 1.0597 | 1.0548 | 0.9061 | 0.9717 | 0.0501 |
| LOC1001342 | 0.9924 | 1.0393 | 1.0121 | 0.8429 | 0.9717 | 0.0440 |
| SERHL      | 0.9506 | 1.0203 | 1.0367 | 0.8790 | 0.9717 | 0.0361 |
| LOC642093  | 0.9186 | 1.0005 | 1.0938 | 0.8737 | 0.9717 | 0.0485 |
| C6orf223   | 0.9018 | 1.0079 | 1.0356 | 0.9413 | 0.9717 | 0.0306 |
| MLL4       | 1.0124 | 1.2101 | 0.7884 | 0.8758 | 0.9717 | 0.0919 |
| LOC729127  | 0.9156 | 1.1255 | 0.9776 | 0.8681 | 0.9717 | 0.0559 |
| APOL2      | 0.9219 | 1.2081 | 0.9448 | 0.8120 | 0.9717 | 0.0840 |
| LOC646145  | 0.7914 | 1.0834 | 1.0800 | 0.9319 | 0.9717 | 0.0697 |
| LOC650744  | 0.9124 | 1.0359 | 1.0353 | 0.9032 | 0.9717 | 0.0369 |
| LOC402207  | 0.9662 | 1.0122 | 1.0617 | 0.8467 | 0.9717 | 0.0460 |
| MIR644     | 0.8856 | 1.0547 | 1.0063 | 0.9401 | 0.9717 | 0.0371 |
| LOC732226  | 0.8849 | 1.0125 | 0.9739 | 1.0154 | 0.9717 | 0.0304 |
| HUS1       | 0.8185 | 1.1405 | 1.0358 | 0.8921 | 0.9717 | 0.0721 |
| GJB4       | 0.8607 | 1.2192 | 0.9542 | 0.8527 | 0.9717 | 0.0857 |
| LOC731895  | 0.8511 | 1.1253 | 1.0549 | 0.8556 | 0.9717 | 0.0698 |
| TMEM101    | 0.7416 | 1.3935 | 1.0311 | 0.7206 | 0.9717 | 0.1574 |
| LOC729141  | 0.8500 | 1.0207 | 1.0921 | 0.9241 | 0.9717 | 0.0532 |
| PEX5       | 0.7565 | 1.4460 | 0.9736 | 0.7108 | 0.9717 | 0.1682 |
| CEP164     | 0.8692 | 1.1261 | 0.9417 | 0.9499 | 0.9717 | 0.0546 |
| OR13C2     | 0.9687 | 1.0146 | 0.9644 | 0.9393 | 0.9717 | 0.0157 |
| LOC644090  | 1.0480 | 1.0510 | 0.9148 | 0.8731 | 0.9717 | 0.0457 |
| PSORS1C1   | 0.8743 | 1.0005 | 1.1815 | 0.8307 | 0.9717 | 0.0786 |
| ZFP41      | 0.9142 | 1.0104 | 1.0334 | 0.9288 | 0.9717 | 0.0295 |

|            |        |        |        |        |        |        |
|------------|--------|--------|--------|--------|--------|--------|
| LOC1001338 | 0.8361 | 1.0706 | 1.0328 | 0.9475 | 0.9717 | 0.0520 |
| LOC139116  | 0.9947 | 1.0295 | 1.0093 | 0.8533 | 0.9717 | 0.0401 |
| LOC644711  | 0.9181 | 1.1290 | 0.9929 | 0.8469 | 0.9717 | 0.0603 |
| ZNF99      | 0.8467 | 1.1406 | 1.0605 | 0.8392 | 0.9717 | 0.0762 |
| PSG5       | 0.9365 | 1.0641 | 0.9141 | 0.9722 | 0.9717 | 0.0330 |
| SNORA38B   | 0.8903 | 0.9502 | 1.0656 | 0.9809 | 0.9717 | 0.0365 |
| TJP2       | 0.8446 | 1.1801 | 0.9841 | 0.8782 | 0.9717 | 0.0755 |
| LOC643133  | 0.9622 | 1.1295 | 1.0132 | 0.7821 | 0.9717 | 0.0722 |
| SF3B14     | 0.9100 | 1.3636 | 0.9766 | 0.6368 | 0.9717 | 0.1499 |
| IL17RA     | 0.9526 | 1.1552 | 0.9417 | 0.8375 | 0.9718 | 0.0664 |
| FAM22E     | 0.9227 | 1.0160 | 1.0430 | 0.9054 | 0.9718 | 0.0340 |
| RUFY2      | 0.8951 | 1.1032 | 1.0059 | 0.8828 | 0.9718 | 0.0518 |
| LOC650881  | 0.8448 | 1.0201 | 1.0506 | 0.9716 | 0.9718 | 0.0453 |
| LOC401480  | 0.9186 | 0.9701 | 1.0708 | 0.9276 | 0.9718 | 0.0349 |
| TM6SF2     | 0.9638 | 1.0522 | 0.9607 | 0.9104 | 0.9718 | 0.0295 |
| LOC1001290 | 0.8918 | 1.0471 | 1.0089 | 0.9393 | 0.9718 | 0.0348 |
| MYO3A      | 0.9752 | 1.0440 | 0.9494 | 0.9185 | 0.9718 | 0.0267 |
| RBBP5      | 0.8269 | 1.2376 | 1.0233 | 0.7994 | 0.9718 | 0.1017 |
| CKAP4      | 0.8762 | 1.4352 | 0.8614 | 0.7144 | 0.9718 | 0.1587 |
| CDADC1     | 0.9149 | 1.0366 | 1.0341 | 0.9017 | 0.9718 | 0.0368 |
| TAL1       | 1.0369 | 1.0255 | 0.9549 | 0.8699 | 0.9718 | 0.0385 |
| LOC643599  | 0.8643 | 1.1139 | 1.0460 | 0.8630 | 0.9718 | 0.0639 |
| COCH       | 0.9683 | 1.0824 | 0.9966 | 0.8400 | 0.9718 | 0.0502 |
| LOC646208  | 0.9539 | 0.9954 | 1.0832 | 0.8548 | 0.9718 | 0.0474 |
| MGC23270   | 0.9272 | 1.0372 | 1.0024 | 0.9204 | 0.9718 | 0.0286 |
| MEGF11     | 0.7985 | 1.0683 | 1.0525 | 0.9679 | 0.9718 | 0.0618 |
| LOC645662  | 1.0630 | 0.9859 | 0.9314 | 0.9070 | 0.9718 | 0.0346 |
| MICALL2    | 1.0107 | 0.9924 | 1.0067 | 0.8775 | 0.9718 | 0.0317 |
| COMMD10    | 0.9030 | 1.2534 | 1.0286 | 0.7023 | 0.9718 | 0.1154 |
| LOR        | 0.8727 | 1.1267 | 0.9673 | 0.9206 | 0.9718 | 0.0551 |
| PHF21B     | 0.9841 | 0.9751 | 0.9727 | 0.9554 | 0.9718 | 0.0060 |
| LOC646304  | 0.9233 | 1.1171 | 0.9516 | 0.8954 | 0.9719 | 0.0498 |
| ZNF407     | 0.9334 | 1.1032 | 0.9710 | 0.8798 | 0.9719 | 0.0476 |
| LOC440334  | 0.9748 | 0.9831 | 0.9703 | 0.9592 | 0.9719 | 0.0050 |
| CCDC11     | 0.9204 | 1.0275 | 1.0503 | 0.8892 | 0.9719 | 0.0395 |
| GRAMD1B    | 0.8483 | 1.0664 | 1.0001 | 0.9726 | 0.9719 | 0.0457 |
| LOC149620  | 0.8407 | 1.1566 | 1.0169 | 0.8733 | 0.9719 | 0.0725 |
| LOC646332  | 1.0410 | 1.0742 | 0.9080 | 0.8642 | 0.9719 | 0.0508 |
| MTSS1L     | 1.0407 | 1.0918 | 0.8844 | 0.8706 | 0.9719 | 0.0556 |
| MIR126     | 0.9384 | 1.0365 | 0.9710 | 0.9416 | 0.9719 | 0.0228 |
| RNASEN     | 0.7597 | 1.4509 | 0.9944 | 0.6825 | 0.9719 | 0.1729 |
| LOC732156  | 0.9829 | 1.0977 | 0.9832 | 0.8237 | 0.9719 | 0.0563 |
| HSF2BP     | 0.8272 | 1.0182 | 1.1535 | 0.8887 | 0.9719 | 0.0724 |
| LOC728728  | 0.9741 | 1.0463 | 0.9680 | 0.8991 | 0.9719 | 0.0301 |
| KLC3       | 0.8906 | 1.0429 | 1.0708 | 0.8832 | 0.9719 | 0.0494 |
| LOC645349  | 1.0043 | 1.0261 | 0.9920 | 0.8651 | 0.9719 | 0.0363 |

|            |        |        |        |        |        |        |
|------------|--------|--------|--------|--------|--------|--------|
| LOC646243  | 0.9130 | 1.0355 | 1.0731 | 0.8660 | 0.9719 | 0.0491 |
| IL17D      | 0.8476 | 1.1016 | 0.9822 | 0.9561 | 0.9719 | 0.0521 |
| C6orf54    | 0.9042 | 1.1701 | 0.9406 | 0.8726 | 0.9719 | 0.0675 |
| LOC647038  | 0.9284 | 1.0006 | 1.0923 | 0.8662 | 0.9719 | 0.0486 |
| TENC1      | 0.9316 | 1.0744 | 1.0095 | 0.8721 | 0.9719 | 0.0443 |
| LOC652865  | 0.8703 | 1.0385 | 0.9838 | 0.9950 | 0.9719 | 0.0359 |
| HOXA6      | 0.8129 | 1.1645 | 0.9959 | 0.9142 | 0.9719 | 0.0743 |
| TTC13      | 0.7815 | 1.3787 | 0.9970 | 0.7304 | 0.9719 | 0.1474 |
| LOC644964  | 0.8866 | 0.9935 | 1.0313 | 0.9762 | 0.9719 | 0.0307 |
| PAX7       | 1.0214 | 1.0464 | 0.9522 | 0.8676 | 0.9719 | 0.0401 |
| FLJ45831   | 0.8557 | 1.0218 | 1.0401 | 0.9701 | 0.9719 | 0.0415 |
| SYNJ2BP    | 0.8160 | 1.2874 | 1.0085 | 0.7759 | 0.9719 | 0.1168 |
| FGD5       | 0.9091 | 1.0786 | 0.9622 | 0.9379 | 0.9719 | 0.0372 |
| STAB2      | 0.9211 | 1.0094 | 1.0280 | 0.9293 | 0.9719 | 0.0273 |
| HTR1A      | 0.9871 | 1.0169 | 1.0284 | 0.8554 | 0.9719 | 0.0398 |
| HTR5A      | 0.9334 | 1.0037 | 1.0696 | 0.8810 | 0.9719 | 0.0411 |
| MGC42630   | 0.8563 | 1.1126 | 0.9268 | 0.9920 | 0.9719 | 0.0544 |
| LOC645946  | 0.9491 | 0.9833 | 1.0043 | 0.9511 | 0.9719 | 0.0133 |
| LOC1001309 | 0.8938 | 1.1179 | 0.9420 | 0.9341 | 0.9719 | 0.0498 |
| MIR377     | 0.8833 | 1.0821 | 1.0551 | 0.8673 | 0.9719 | 0.0562 |
| LOC440287  | 1.0059 | 1.1191 | 0.8614 | 0.9014 | 0.9720 | 0.0577 |
| CXorf24    | 0.8997 | 1.1069 | 1.0777 | 0.8035 | 0.9720 | 0.0724 |
| MIR1286    | 1.0136 | 1.0538 | 0.9945 | 0.8260 | 0.9720 | 0.0502 |
| LOC732272  | 0.8784 | 1.0786 | 0.9756 | 0.9553 | 0.9720 | 0.0413 |
| KIAA1377   | 1.0287 | 1.0376 | 0.9841 | 0.8374 | 0.9720 | 0.0464 |
| PCDHB16    | 0.9567 | 1.0390 | 0.9985 | 0.8937 | 0.9720 | 0.0310 |
| SUZ12P     | 0.9020 | 1.0780 | 1.0214 | 0.8865 | 0.9720 | 0.0465 |
| MIR628     | 0.9838 | 1.0227 | 1.0714 | 0.8099 | 0.9720 | 0.0569 |
| LOC729199  | 0.9373 | 1.0562 | 0.9636 | 0.9308 | 0.9720 | 0.0290 |
| LOC1001335 | 1.0354 | 0.9960 | 0.9679 | 0.8886 | 0.9720 | 0.0311 |
| USP15      | 0.9441 | 1.1375 | 1.0641 | 0.7422 | 0.9720 | 0.0863 |
| EGFL10     | 0.9808 | 1.0150 | 0.9818 | 0.9103 | 0.9720 | 0.0220 |
| LOC729025  | 0.7728 | 1.1018 | 1.0710 | 0.9423 | 0.9720 | 0.0748 |
| IRAK4      | 0.9387 | 1.1594 | 0.9492 | 0.8407 | 0.9720 | 0.0671 |
| SLC8A2     | 0.8955 | 1.0302 | 1.0470 | 0.9154 | 0.9720 | 0.0388 |
| LOC401398  | 0.9567 | 1.1683 | 0.9871 | 0.7759 | 0.9720 | 0.0803 |
| TXNDC14    | 0.8137 | 1.3281 | 1.0826 | 0.6636 | 0.9720 | 0.1470 |
| LOC1001315 | 0.8640 | 1.0901 | 1.0307 | 0.9033 | 0.9720 | 0.0531 |
| LOC1001304 | 0.9564 | 1.1214 | 0.9589 | 0.8514 | 0.9720 | 0.0557 |
| KIF13A     | 0.9714 | 1.0687 | 0.8866 | 0.9613 | 0.9720 | 0.0374 |
| XK         | 0.9210 | 1.0014 | 1.0335 | 0.9321 | 0.9720 | 0.0272 |
| LOC1001314 | 0.7866 | 1.1260 | 1.1191 | 0.8564 | 0.9720 | 0.0881 |
| AZU1       | 0.9751 | 0.9531 | 1.0116 | 0.9484 | 0.9720 | 0.0144 |
| LOC1001327 | 0.7890 | 1.2327 | 1.1951 | 0.6713 | 0.9720 | 0.1419 |
| SNORD72    | 0.9664 | 1.1016 | 0.9468 | 0.8733 | 0.9720 | 0.0476 |
| FSHR       | 0.9781 | 1.0175 | 0.9662 | 0.9263 | 0.9720 | 0.0188 |



|            |        |        |        |        |        |        |
|------------|--------|--------|--------|--------|--------|--------|
| SMEK1      | 0.8435 | 1.0827 | 1.0342 | 0.9278 | 0.9720 | 0.0537 |
| SBSN       | 0.9910 | 1.0405 | 0.9623 | 0.8944 | 0.9720 | 0.0305 |
| RILPL2     | 0.8373 | 1.4145 | 0.9293 | 0.7070 | 0.9720 | 0.1544 |
| CD3E       | 0.9754 | 1.0881 | 0.9311 | 0.8935 | 0.9720 | 0.0422 |
| FAM63B     | 0.9479 | 0.9734 | 1.0903 | 0.8766 | 0.9720 | 0.0444 |
| TNMD       | 0.9008 | 0.9945 | 0.9228 | 1.0701 | 0.9721 | 0.0383 |
| MIR216A    | 0.9510 | 1.0759 | 0.9694 | 0.8919 | 0.9721 | 0.0383 |
| MYLC2PL    | 0.9488 | 1.0480 | 0.9370 | 0.9545 | 0.9721 | 0.0256 |
| NMD3       | 0.9065 | 1.2137 | 1.0652 | 0.7028 | 0.9721 | 0.1095 |
| LOC401296  | 0.8775 | 1.1414 | 0.9611 | 0.9081 | 0.9721 | 0.0590 |
| LOC643825  | 0.8794 | 1.0274 | 1.0398 | 0.9416 | 0.9721 | 0.0378 |
| CLDN6      | 0.9493 | 0.9554 | 1.0406 | 0.9429 | 0.9721 | 0.0230 |
| RGS18      | 0.9153 | 0.9847 | 0.9920 | 0.9963 | 0.9721 | 0.0191 |
| STAR       | 0.9052 | 1.0902 | 0.9651 | 0.9277 | 0.9721 | 0.0413 |
| LOC729948  | 0.8885 | 1.1242 | 0.9682 | 0.9074 | 0.9721 | 0.0535 |
| OR7C2      | 0.8829 | 1.1933 | 0.9623 | 0.8498 | 0.9721 | 0.0774 |
| CHRM4      | 0.9342 | 1.0531 | 0.9852 | 0.9158 | 0.9721 | 0.0307 |
| LOC1001304 | 0.9169 | 1.0044 | 1.0444 | 0.9227 | 0.9721 | 0.0313 |
| LOC646713  | 0.8574 | 1.0197 | 1.1214 | 0.8899 | 0.9721 | 0.0609 |
| FEZF1      | 1.0249 | 1.0442 | 0.9472 | 0.8720 | 0.9721 | 0.0394 |
| HTATSF1    | 0.9989 | 1.0239 | 1.0520 | 0.8136 | 0.9721 | 0.0539 |
| ATN1       | 0.9499 | 1.1354 | 0.9609 | 0.8422 | 0.9721 | 0.0607 |
| C21orf99   | 0.8845 | 1.1218 | 1.0361 | 0.8461 | 0.9721 | 0.0646 |
| LOC1001341 | 0.8663 | 1.0682 | 1.0412 | 0.9128 | 0.9721 | 0.0489 |
| LOC651558  | 0.8523 | 1.1393 | 1.0048 | 0.8920 | 0.9721 | 0.0644 |
| POTEB      | 0.9503 | 1.0041 | 1.0267 | 0.9073 | 0.9721 | 0.0269 |
| CTRB1      | 0.9635 | 0.9804 | 1.1021 | 0.8425 | 0.9721 | 0.0531 |
| LUC7L      | 0.8823 | 1.1866 | 0.9969 | 0.8227 | 0.9721 | 0.0801 |
| VCP        | 0.7838 | 1.3294 | 1.0046 | 0.7707 | 0.9721 | 0.1306 |
| MIR613     | 0.9289 | 0.9923 | 0.9967 | 0.9707 | 0.9721 | 0.0155 |
| FLJ90680   | 0.9618 | 1.1087 | 0.9446 | 0.8735 | 0.9721 | 0.0494 |
| OR5K2      | 0.9344 | 0.9716 | 1.0403 | 0.9423 | 0.9721 | 0.0241 |
| LOC1001316 | 0.9595 | 1.0695 | 1.0023 | 0.8572 | 0.9721 | 0.0445 |
| RPS6KA3    | 0.8851 | 1.1310 | 1.0151 | 0.8575 | 0.9722 | 0.0631 |
| OR1F1      | 0.8617 | 1.0435 | 1.0581 | 0.9252 | 0.9722 | 0.0473 |
| TSPAN17    | 0.8789 | 1.2951 | 0.9607 | 0.7540 | 0.9722 | 0.1157 |
| LOC646879  | 0.8662 | 1.1145 | 1.0488 | 0.8592 | 0.9722 | 0.0646 |
| LOC649162  | 0.8189 | 1.0283 | 1.1192 | 0.9222 | 0.9722 | 0.0650 |
| LOC388572  | 0.9494 | 1.0475 | 0.9797 | 0.9121 | 0.9722 | 0.0287 |
| ITGBL1     | 0.8631 | 1.1230 | 1.0034 | 0.8993 | 0.9722 | 0.0584 |
| NR4A1      | 0.9732 | 1.0649 | 0.9668 | 0.8838 | 0.9722 | 0.0370 |
| LCE1B      | 0.9273 | 1.1533 | 0.9784 | 0.8297 | 0.9722 | 0.0678 |
| KCTD4      | 0.9755 | 0.9518 | 0.9907 | 0.9708 | 0.9722 | 0.0080 |
| BCAM       | 0.9371 | 1.0608 | 0.9590 | 0.9318 | 0.9722 | 0.0301 |
| MIR499     | 0.9272 | 0.9795 | 1.0292 | 0.9529 | 0.9722 | 0.0218 |
| LOC1001338 | 0.9827 | 0.9731 | 1.0247 | 0.9083 | 0.9722 | 0.0241 |

|            |        |        |        |        |        |        |
|------------|--------|--------|--------|--------|--------|--------|
| CART1      | 0.9434 | 1.0559 | 1.0520 | 0.8375 | 0.9722 | 0.0519 |
| LOC652704  | 0.9000 | 1.0953 | 0.9893 | 0.9043 | 0.9722 | 0.0459 |
| LOC440525  | 0.7486 | 1.0990 | 1.1356 | 0.9056 | 0.9722 | 0.0900 |
| HPGDS      | 0.9548 | 1.1305 | 0.9318 | 0.8717 | 0.9722 | 0.0556 |
| LOC650543  | 1.0008 | 1.0555 | 0.9165 | 0.9160 | 0.9722 | 0.0342 |
| FLJ45684   | 0.8919 | 1.0650 | 1.0451 | 0.8869 | 0.9722 | 0.0480 |
| IL5RA      | 1.0216 | 1.0458 | 1.0028 | 0.8187 | 0.9722 | 0.0519 |
| LOC729759  | 0.9847 | 1.0250 | 0.9663 | 0.9129 | 0.9722 | 0.0233 |
| C16orf71   | 1.0247 | 1.0261 | 1.0203 | 0.8179 | 0.9722 | 0.0515 |
| LOC1001290 | 0.8799 | 1.0584 | 1.0122 | 0.9384 | 0.9722 | 0.0395 |
| LOC646207  | 0.9880 | 0.9177 | 1.0690 | 0.9143 | 0.9722 | 0.0364 |
| IGFBP7     | 0.8674 | 1.1135 | 1.0156 | 0.8924 | 0.9722 | 0.0572 |
| LOC646903  | 0.9291 | 0.9517 | 1.0355 | 0.9726 | 0.9723 | 0.0229 |
| CCL3L3     | 1.0406 | 0.9861 | 0.9083 | 0.9539 | 0.9723 | 0.0278 |
| FAM26C     | 0.9185 | 1.0235 | 1.0098 | 0.9373 | 0.9723 | 0.0261 |
| SPRN       | 0.8177 | 1.2364 | 0.9635 | 0.8716 | 0.9723 | 0.0930 |
| FLJ12078   | 0.9121 | 1.2410 | 0.8887 | 0.8473 | 0.9723 | 0.0906 |
| BTRC       | 0.9025 | 1.1016 | 1.0128 | 0.8722 | 0.9723 | 0.0526 |
| SNORA74A   | 0.8497 | 1.0928 | 1.0282 | 0.9184 | 0.9723 | 0.0545 |
| LOC646576  | 0.9178 | 0.9703 | 1.0334 | 0.9676 | 0.9723 | 0.0237 |
| IMMP1L     | 0.8988 | 1.0275 | 1.0585 | 0.9043 | 0.9723 | 0.0413 |
| LOC650770  | 0.9744 | 1.0051 | 0.9826 | 0.9272 | 0.9723 | 0.0164 |
| TTC22      | 0.9338 | 1.1147 | 1.0171 | 0.8237 | 0.9723 | 0.0618 |
| FLJ32810   | 0.9882 | 1.0288 | 0.9678 | 0.9043 | 0.9723 | 0.0260 |
| LOC642506  | 0.9851 | 0.9675 | 1.0289 | 0.9077 | 0.9723 | 0.0251 |
| OR2L13     | 0.8542 | 1.0674 | 1.0417 | 0.9261 | 0.9723 | 0.0500 |
| SPAG11B    | 0.8962 | 1.0684 | 0.9938 | 0.9309 | 0.9723 | 0.0379 |
| CCNB3      | 0.9275 | 1.0743 | 1.0014 | 0.8862 | 0.9723 | 0.0415 |
| ERO1LB     | 0.8915 | 1.2746 | 0.9127 | 0.8105 | 0.9723 | 0.1031 |
| DAD1L      | 0.9034 | 1.0883 | 0.9943 | 0.9034 | 0.9723 | 0.0442 |
| LOC644952  | 0.9066 | 0.9913 | 1.0131 | 0.9783 | 0.9724 | 0.0231 |
| PYHIN1     | 0.9407 | 1.0293 | 1.0249 | 0.8945 | 0.9724 | 0.0330 |
| PRF1       | 0.8342 | 1.1486 | 0.9756 | 0.9310 | 0.9724 | 0.0657 |
| OR5M10     | 0.8612 | 1.1558 | 1.0110 | 0.8614 | 0.9724 | 0.0706 |
| LOC728470  | 0.8499 | 0.9705 | 1.0819 | 0.9871 | 0.9724 | 0.0476 |
| LOC652565  | 0.9058 | 1.0570 | 1.0356 | 0.8911 | 0.9724 | 0.0430 |
| ZFP14      | 0.9420 | 1.1055 | 0.9732 | 0.8688 | 0.9724 | 0.0495 |
| LOC339674  | 0.9637 | 0.9998 | 0.9947 | 0.9313 | 0.9724 | 0.0159 |
| LOC645590  | 0.8987 | 1.0481 | 1.0521 | 0.8906 | 0.9724 | 0.0449 |
| LOC650759  | 0.8445 | 1.1736 | 0.9991 | 0.8724 | 0.9724 | 0.0750 |
| C7orf66    | 0.9512 | 1.0903 | 0.9571 | 0.8910 | 0.9724 | 0.0420 |
| LOC338805  | 0.9674 | 1.0252 | 1.0380 | 0.8590 | 0.9724 | 0.0408 |
| FAM124A    | 0.9174 | 1.0625 | 1.0404 | 0.8693 | 0.9724 | 0.0469 |
| OTOR       | 0.9210 | 1.0459 | 1.0053 | 0.9174 | 0.9724 | 0.0318 |
| SALL2      | 0.9334 | 1.2711 | 0.8866 | 0.7985 | 0.9724 | 0.1034 |
| LOC1001346 | 0.9827 | 1.0881 | 0.9712 | 0.8477 | 0.9724 | 0.0492 |

|            |        |        |        |        |        |        |
|------------|--------|--------|--------|--------|--------|--------|
| LOC646864  | 1.0045 | 1.0675 | 0.9239 | 0.8938 | 0.9724 | 0.0394 |
| LOC1001332 | 0.8688 | 1.0077 | 1.0455 | 0.9676 | 0.9724 | 0.0380 |
| LOC390205  | 0.8765 | 1.0640 | 1.0115 | 0.9378 | 0.9724 | 0.0411 |
| LOC649330  | 0.8392 | 1.1170 | 0.9663 | 0.9672 | 0.9724 | 0.0568 |
| WASL       | 0.9012 | 1.3092 | 0.9464 | 0.7328 | 0.9724 | 0.1213 |
| LOC345051  | 0.8010 | 1.1058 | 1.0551 | 0.9279 | 0.9724 | 0.0683 |
| LOC728224  | 0.9164 | 1.0714 | 1.0474 | 0.8545 | 0.9724 | 0.0520 |
| FLJ22447   | 0.8999 | 1.0487 | 1.0471 | 0.8941 | 0.9724 | 0.0436 |
| PMCHL1     | 0.8783 | 1.1835 | 0.8899 | 0.9380 | 0.9724 | 0.0715 |
| IL29       | 0.9325 | 1.0143 | 1.0347 | 0.9082 | 0.9724 | 0.0308 |
| LOC731082  | 0.8583 | 0.9434 | 1.1045 | 0.9837 | 0.9724 | 0.0512 |
| LOC1001303 | 0.8100 | 1.0753 | 1.0758 | 0.9287 | 0.9724 | 0.0643 |
| LOC1001282 | 0.9209 | 1.0792 | 1.0013 | 0.8884 | 0.9724 | 0.0428 |
| LOC649456  | 0.9699 | 0.9989 | 0.9571 | 0.9639 | 0.9725 | 0.0092 |
| RAB11FIP1  | 0.8704 | 1.3109 | 0.9551 | 0.7534 | 0.9725 | 0.1202 |
| LOC1001280 | 0.9398 | 1.0268 | 0.9782 | 0.9451 | 0.9725 | 0.0200 |
| NEUROD1    | 0.9143 | 1.0686 | 0.9845 | 0.9225 | 0.9725 | 0.0357 |
| CPLX2      | 0.8885 | 1.0710 | 0.9908 | 0.9395 | 0.9725 | 0.0389 |
| LOC729231  | 0.9366 | 1.0577 | 0.9864 | 0.9092 | 0.9725 | 0.0326 |
| LOC650810  | 0.9841 | 1.0312 | 0.9923 | 0.8823 | 0.9725 | 0.0318 |
| LOC651113  | 0.9442 | 1.1923 | 0.8935 | 0.8599 | 0.9725 | 0.0753 |
| LOC652258  | 0.9604 | 1.0214 | 0.9904 | 0.9178 | 0.9725 | 0.0221 |
| LOC1001328 | 0.9191 | 1.0415 | 0.9889 | 0.9405 | 0.9725 | 0.0272 |
| EHD4       | 0.8913 | 1.4046 | 0.9489 | 0.6452 | 0.9725 | 0.1584 |
| HSF4       | 0.8970 | 1.1446 | 1.0199 | 0.8286 | 0.9725 | 0.0697 |
| LOC728946  | 0.9110 | 1.0377 | 1.0363 | 0.9049 | 0.9725 | 0.0373 |
| DGCR14     | 0.8925 | 1.2260 | 0.8960 | 0.8755 | 0.9725 | 0.0846 |
| PCDHA6     | 0.9087 | 1.0090 | 1.0594 | 0.9129 | 0.9725 | 0.0371 |
| LOC644098  | 0.8086 | 1.0392 | 1.0560 | 0.9863 | 0.9725 | 0.0566 |
| MIR210     | 0.9366 | 1.0591 | 1.0083 | 0.8862 | 0.9725 | 0.0382 |
| EPHB1      | 0.9320 | 1.0597 | 1.0026 | 0.8959 | 0.9725 | 0.0365 |
| RXRβ       | 0.8814 | 1.3350 | 0.9163 | 0.7574 | 0.9725 | 0.1255 |
| TNFRSF11A  | 0.8802 | 1.1313 | 0.9747 | 0.9039 | 0.9725 | 0.0566 |
| MFSD2B     | 0.9907 | 1.0180 | 0.9512 | 0.9303 | 0.9725 | 0.0196 |
| SOX7       | 0.8810 | 1.0059 | 1.0871 | 0.9162 | 0.9725 | 0.0463 |
| LOC390282  | 0.9459 | 1.0616 | 0.9952 | 0.8875 | 0.9725 | 0.0370 |
| LOC646933  | 0.9218 | 1.1592 | 1.0451 | 0.7640 | 0.9725 | 0.0847 |
| LOC286094  | 0.9941 | 1.0033 | 0.8791 | 1.0138 | 0.9726 | 0.0314 |
| PRKCCQ     | 0.9016 | 1.1044 | 1.0053 | 0.8790 | 0.9726 | 0.0518 |
| CDC16      | 0.8055 | 1.3771 | 0.9358 | 0.7719 | 0.9726 | 0.1394 |
| ZNF22      | 0.8814 | 1.0293 | 1.0836 | 0.8959 | 0.9726 | 0.0498 |
| LOC387762  | 0.9367 | 1.0602 | 1.0116 | 0.8818 | 0.9726 | 0.0395 |
| PACAP      | 0.9081 | 1.0131 | 1.0811 | 0.8880 | 0.9726 | 0.0454 |
| KRT126P    | 0.9321 | 1.1085 | 0.9867 | 0.8630 | 0.9726 | 0.0519 |
| LOC649804  | 0.9070 | 0.9367 | 1.0629 | 0.9836 | 0.9726 | 0.0340 |
| FUSSEL18   | 0.9062 | 1.0934 | 0.9857 | 0.9051 | 0.9726 | 0.0445 |

|            |        |        |        |        |        |        |
|------------|--------|--------|--------|--------|--------|--------|
| PLCE1      | 0.9189 | 0.9969 | 1.0672 | 0.9074 | 0.9726 | 0.0373 |
| MIR887     | 0.9421 | 0.9939 | 0.9985 | 0.9559 | 0.9726 | 0.0140 |
| RAB7B      | 0.9727 | 1.0155 | 0.9422 | 0.9600 | 0.9726 | 0.0156 |
| NFIL3      | 0.8695 | 1.1516 | 1.1239 | 0.7455 | 0.9726 | 0.0988 |
| CD14       | 0.8936 | 1.0972 | 0.9592 | 0.9404 | 0.9726 | 0.0438 |
| RERE       | 0.9163 | 1.1642 | 0.9175 | 0.8925 | 0.9726 | 0.0641 |
| LOC653582  | 0.9571 | 1.0878 | 0.9461 | 0.8994 | 0.9726 | 0.0404 |
| ESF1       | 0.9014 | 1.0155 | 1.0553 | 0.9184 | 0.9726 | 0.0373 |
| WDR78      | 0.9145 | 1.0469 | 1.0267 | 0.9025 | 0.9726 | 0.0374 |
| LOC1001338 | 0.8150 | 1.0932 | 1.1078 | 0.8745 | 0.9726 | 0.0749 |
| GDF5       | 0.8732 | 1.1010 | 1.0071 | 0.9093 | 0.9727 | 0.0513 |
| MATN3      | 0.8646 | 1.0886 | 0.9661 | 0.9714 | 0.9727 | 0.0458 |
| C3orf38    | 0.7647 | 1.3564 | 1.0966 | 0.6730 | 0.9727 | 0.1570 |
| LOC650879  | 0.8404 | 1.1999 | 0.9075 | 0.9428 | 0.9727 | 0.0787 |
| ITGAM      | 0.8515 | 1.1223 | 1.1082 | 0.8088 | 0.9727 | 0.0828 |
| ANKFN1     | 0.9970 | 1.0072 | 0.9708 | 0.9158 | 0.9727 | 0.0205 |
| ZNF687     | 0.9057 | 0.9905 | 1.0377 | 0.9569 | 0.9727 | 0.0278 |
| C1orf132   | 0.9119 | 1.1208 | 0.8697 | 0.9884 | 0.9727 | 0.0552 |
| BDH1       | 0.8685 | 1.1124 | 1.0598 | 0.8500 | 0.9727 | 0.0665 |
| ANKRD28    | 0.9202 | 1.2384 | 0.9405 | 0.7916 | 0.9727 | 0.0945 |
| MIR1321    | 0.9211 | 1.1575 | 0.9918 | 0.8204 | 0.9727 | 0.0709 |
| AVPR1B     | 0.9580 | 1.0484 | 0.9587 | 0.9258 | 0.9727 | 0.0264 |
| LOC642838  | 0.9043 | 1.1432 | 1.0130 | 0.8303 | 0.9727 | 0.0681 |
| LOC1001338 | 0.9533 | 1.0083 | 1.0355 | 0.8937 | 0.9727 | 0.0314 |
| RGS3       | 0.9064 | 1.0823 | 1.0410 | 0.8612 | 0.9727 | 0.0529 |
| KRAS       | 0.8796 | 1.2325 | 0.9809 | 0.7978 | 0.9727 | 0.0944 |
| LOC1001322 | 0.8887 | 1.0173 | 1.0990 | 0.8860 | 0.9727 | 0.0521 |
| MIR518E    | 0.9451 | 1.0773 | 0.9088 | 0.9597 | 0.9727 | 0.0365 |
| SPHK1      | 0.8589 | 1.1309 | 1.0449 | 0.8562 | 0.9727 | 0.0688 |
| PCDHGA9    | 0.9144 | 1.0263 | 1.0929 | 0.8575 | 0.9727 | 0.0532 |
| MLNR       | 0.9288 | 1.0572 | 1.0257 | 0.8793 | 0.9727 | 0.0414 |
| MUC4       | 0.8979 | 1.0909 | 1.0138 | 0.8884 | 0.9728 | 0.0486 |
| C6orf100   | 0.9360 | 1.0324 | 0.9697 | 0.9529 | 0.9728 | 0.0210 |
| GSTA4      | 0.9214 | 1.1939 | 1.0737 | 0.7020 | 0.9728 | 0.1061 |
| PLXNB1     | 1.0645 | 1.2507 | 0.8195 | 0.7563 | 0.9728 | 0.1140 |
| SCUBE2     | 0.8688 | 1.0397 | 1.0987 | 0.8839 | 0.9728 | 0.0570 |
| ZNF645     | 1.0488 | 1.0961 | 0.8344 | 0.9118 | 0.9728 | 0.0604 |
| IL7R       | 0.9344 | 1.1299 | 0.9715 | 0.8553 | 0.9728 | 0.0577 |
| RUSC2      | 0.8548 | 1.2768 | 0.9100 | 0.8495 | 0.9728 | 0.1023 |
| KLK12      | 0.9852 | 0.9804 | 1.0199 | 0.9056 | 0.9728 | 0.0241 |
| LOC653591  | 0.9058 | 1.0716 | 1.1221 | 0.7917 | 0.9728 | 0.0760 |
| C14orf182  | 0.9045 | 1.0262 | 1.0189 | 0.9416 | 0.9728 | 0.0298 |
| OR8K3      | 0.8852 | 0.9912 | 1.0632 | 0.9516 | 0.9728 | 0.0372 |
| LOC644420  | 0.9513 | 1.0403 | 1.0549 | 0.8447 | 0.9728 | 0.0484 |
| LOC642032  | 0.9253 | 1.1761 | 0.9191 | 0.8707 | 0.9728 | 0.0688 |
| SLC15A3    | 0.9533 | 1.0032 | 1.0684 | 0.8662 | 0.9728 | 0.0426 |

|            |        |        |        |        |        |        |
|------------|--------|--------|--------|--------|--------|--------|
| LOC1001282 | 0.9240 | 1.0197 | 1.0470 | 0.9004 | 0.9728 | 0.0357 |
| LOC646097  | 0.9135 | 0.9820 | 1.0148 | 0.9809 | 0.9728 | 0.0213 |
| FAM83C     | 0.9238 | 1.0785 | 0.9758 | 0.9131 | 0.9728 | 0.0378 |
| LOC1001340 | 0.9375 | 1.0748 | 0.9807 | 0.8982 | 0.9728 | 0.0379 |
| SPRED3     | 0.9496 | 1.0065 | 0.9927 | 0.9424 | 0.9728 | 0.0158 |
| NXF2B      | 0.8574 | 1.0472 | 1.0635 | 0.9232 | 0.9728 | 0.0496 |
| LOC1001315 | 0.8803 | 1.0585 | 1.0409 | 0.9116 | 0.9728 | 0.0450 |
| DHX32      | 0.8777 | 1.3421 | 0.9402 | 0.7314 | 0.9728 | 0.1306 |
| UNC13D     | 1.0339 | 0.9509 | 0.9632 | 0.9434 | 0.9728 | 0.0207 |
| LOC647020  | 1.0043 | 1.0506 | 0.9349 | 0.9015 | 0.9728 | 0.0336 |
| LOC1001304 | 0.8976 | 1.1788 | 0.9496 | 0.8654 | 0.9728 | 0.0708 |
| LOC148413  | 0.9303 | 1.3116 | 0.9465 | 0.7029 | 0.9728 | 0.1259 |
| NEK1       | 0.8014 | 1.1631 | 1.2255 | 0.7013 | 0.9729 | 0.1301 |
| IGJ        | 0.9352 | 1.0617 | 0.9566 | 0.9380 | 0.9729 | 0.0300 |
| CERCAM     | 0.9330 | 0.9958 | 1.0006 | 0.9619 | 0.9729 | 0.0158 |
| LOC643344  | 0.9027 | 1.0630 | 0.9491 | 0.9767 | 0.9729 | 0.0337 |
| OR4D11     | 0.8857 | 1.0501 | 0.9671 | 0.9885 | 0.9729 | 0.0340 |
| ZNF599     | 0.8894 | 1.0414 | 0.9938 | 0.9668 | 0.9729 | 0.0318 |
| LOC653930  | 1.0172 | 1.0072 | 1.0197 | 0.8474 | 0.9729 | 0.0419 |
| HMG3       | 0.9669 | 1.0540 | 1.0190 | 0.8515 | 0.9729 | 0.0442 |
| GSC2       | 1.0317 | 0.9908 | 1.0243 | 0.8445 | 0.9729 | 0.0437 |
| LOC646280  | 0.9078 | 1.1569 | 0.9466 | 0.8801 | 0.9729 | 0.0628 |
| C1orf198   | 0.8865 | 1.3674 | 0.9147 | 0.7229 | 0.9729 | 0.1381 |
| SYDE1      | 0.9167 | 1.0958 | 0.9585 | 0.9204 | 0.9729 | 0.0421 |
| HEMGN      | 0.9200 | 1.0670 | 0.9583 | 0.9462 | 0.9729 | 0.0324 |
| LOC653104  | 0.9672 | 1.0035 | 1.0518 | 0.8690 | 0.9729 | 0.0387 |
| LOC1001335 | 0.9966 | 0.9976 | 0.9356 | 0.9617 | 0.9729 | 0.0150 |
| SLC7A4     | 0.9343 | 1.0752 | 0.9995 | 0.8825 | 0.9729 | 0.0417 |
| DCLK3      | 0.8692 | 1.1057 | 1.0991 | 0.8175 | 0.9729 | 0.0755 |
| FLJ44450   | 0.9641 | 1.0798 | 0.9942 | 0.8534 | 0.9729 | 0.0468 |
| DEFA4      | 0.9239 | 1.1622 | 0.9637 | 0.8417 | 0.9729 | 0.0680 |
| LOC1001287 | 0.9436 | 1.1010 | 0.9478 | 0.8992 | 0.9729 | 0.0441 |
| GTF2A2     | 0.9241 | 1.3785 | 0.9780 | 0.6109 | 0.9729 | 0.1576 |
| SNORD26    | 0.8597 | 1.0114 | 1.0093 | 1.0112 | 0.9729 | 0.0377 |
| OR2A9P     | 0.9294 | 1.0617 | 1.0760 | 0.8247 | 0.9729 | 0.0594 |
| LOC642909  | 0.8985 | 1.0856 | 1.0700 | 0.8376 | 0.9729 | 0.0619 |
| KU-MEL-3   | 0.8600 | 0.9995 | 1.0820 | 0.9502 | 0.9729 | 0.0464 |
| GPR32      | 0.8310 | 1.0369 | 1.0738 | 0.9499 | 0.9729 | 0.0539 |
| MYH7       | 0.9916 | 1.0714 | 0.9172 | 0.9115 | 0.9729 | 0.0376 |
| LOC648955  | 0.9966 | 0.9111 | 1.0905 | 0.8936 | 0.9729 | 0.0452 |
| FLJ44881   | 0.9002 | 1.0462 | 1.0402 | 0.9051 | 0.9729 | 0.0406 |
| MIR2052    | 0.9639 | 1.0183 | 1.0478 | 0.8618 | 0.9729 | 0.0409 |
| MCOLN1     | 0.9151 | 1.3315 | 0.9638 | 0.6813 | 0.9729 | 0.1345 |
| LOC644010  | 0.9209 | 1.0607 | 1.0651 | 0.8451 | 0.9729 | 0.0542 |
| ABCA9      | 0.9303 | 1.1018 | 0.9796 | 0.8801 | 0.9729 | 0.0475 |
| LOC643328  | 1.1188 | 1.0157 | 0.9028 | 0.8545 | 0.9729 | 0.0592 |

|            |        |        |        |        |        |        |
|------------|--------|--------|--------|--------|--------|--------|
| LOC649407  | 0.9316 | 1.0712 | 1.0234 | 0.8655 | 0.9729 | 0.0460 |
| C1orf65    | 1.0075 | 1.0483 | 0.9309 | 0.9052 | 0.9730 | 0.0332 |
| TCOF1      | 0.9128 | 1.0396 | 1.0068 | 0.9326 | 0.9730 | 0.0301 |
| LDB3       | 0.9339 | 1.0663 | 1.0275 | 0.8642 | 0.9730 | 0.0457 |
| SERPINA3   | 1.0094 | 1.0420 | 0.9040 | 0.9366 | 0.9730 | 0.0319 |
| OR6X1      | 0.9409 | 1.0730 | 1.0345 | 0.8436 | 0.9730 | 0.0513 |
| POLR2A     | 0.9124 | 1.1945 | 1.0039 | 0.7813 | 0.9730 | 0.0868 |
| LIPL4      | 0.9355 | 1.1263 | 0.9479 | 0.8824 | 0.9730 | 0.0530 |
| MACC1      | 0.8797 | 1.1484 | 0.9942 | 0.8698 | 0.9730 | 0.0649 |
| C2orf53    | 0.9630 | 1.0600 | 0.9785 | 0.8906 | 0.9730 | 0.0347 |
| LOC652669  | 0.9248 | 1.2160 | 0.9277 | 0.8237 | 0.9730 | 0.0845 |
| CETN1      | 0.9108 | 1.1428 | 1.0216 | 0.8169 | 0.9730 | 0.0704 |
| KEL        | 0.9396 | 1.0059 | 1.0277 | 0.9189 | 0.9730 | 0.0260 |
| FCAR       | 0.8856 | 1.1196 | 1.0179 | 0.8690 | 0.9730 | 0.0591 |
| LOC730076  | 0.8868 | 1.0229 | 1.0763 | 0.9061 | 0.9730 | 0.0457 |
| LOC642669  | 1.0515 | 1.0078 | 1.0006 | 0.8322 | 0.9730 | 0.0483 |
| NOTCH2     | 0.9067 | 1.0648 | 1.0406 | 0.8800 | 0.9730 | 0.0466 |
| LOC644841  | 0.8693 | 0.9594 | 1.1105 | 0.9530 | 0.9730 | 0.0502 |
| LOC390937  | 0.8623 | 1.0631 | 1.0712 | 0.8956 | 0.9730 | 0.0548 |
| LOC646179  | 0.9809 | 0.9011 | 1.1212 | 0.8890 | 0.9730 | 0.0534 |
| NDEL1      | 0.8418 | 1.3839 | 0.9130 | 0.7535 | 0.9730 | 0.1408 |
| LOC441806  | 0.9069 | 0.9994 | 1.0769 | 0.9090 | 0.9730 | 0.0408 |
| OR4K15     | 0.9440 | 1.0551 | 0.9883 | 0.9048 | 0.9730 | 0.0322 |
| C20orf118  | 0.9495 | 1.0386 | 1.0097 | 0.8945 | 0.9731 | 0.0321 |
| MMP27      | 0.9957 | 1.0548 | 0.8944 | 0.9473 | 0.9731 | 0.0342 |
| OR4M2      | 0.9847 | 1.0415 | 0.9701 | 0.8959 | 0.9731 | 0.0300 |
| LOC644397  | 0.9328 | 0.9806 | 0.9708 | 1.0081 | 0.9731 | 0.0156 |
| LOC644005  | 0.9622 | 1.1108 | 0.8960 | 0.9233 | 0.9731 | 0.0479 |
| FIT1       | 0.9633 | 1.0129 | 1.0262 | 0.8900 | 0.9731 | 0.0308 |
| MIR342     | 0.8812 | 1.0681 | 1.0745 | 0.8685 | 0.9731 | 0.0568 |
| LOC1001328 | 0.9008 | 1.0075 | 1.0562 | 0.9278 | 0.9731 | 0.0358 |
| TTBK2      | 0.9196 | 1.0023 | 1.0880 | 0.8824 | 0.9731 | 0.0458 |
| SART1      | 0.9786 | 1.0773 | 0.8911 | 0.9454 | 0.9731 | 0.0391 |
| EFHA2      | 0.8451 | 1.1321 | 1.0509 | 0.8643 | 0.9731 | 0.0704 |
| LOC1001288 | 0.9808 | 1.0574 | 0.9889 | 0.8653 | 0.9731 | 0.0398 |
| LOC649495  | 0.9228 | 1.0732 | 1.0228 | 0.8737 | 0.9731 | 0.0456 |
| TCF2       | 0.8820 | 1.1118 | 1.0138 | 0.8849 | 0.9731 | 0.0555 |
| SSX7       | 0.9078 | 1.1396 | 0.9017 | 0.9435 | 0.9731 | 0.0562 |
| PROKR1     | 0.9191 | 1.0598 | 0.9574 | 0.9561 | 0.9731 | 0.0302 |
| TEAD1      | 0.9802 | 1.0694 | 0.9728 | 0.8701 | 0.9731 | 0.0408 |
| C11orf63   | 0.8934 | 1.0644 | 1.0683 | 0.8663 | 0.9731 | 0.0541 |
| LOC1001307 | 1.0275 | 1.0175 | 0.9994 | 0.8480 | 0.9731 | 0.0421 |
| HHCM       | 0.9523 | 1.0864 | 0.9949 | 0.8589 | 0.9731 | 0.0472 |
| LOC1001329 | 0.9072 | 1.0885 | 0.9856 | 0.9111 | 0.9731 | 0.0425 |
| SPRR4      | 1.0221 | 1.0381 | 0.9665 | 0.8659 | 0.9731 | 0.0389 |
| LOC645752  | 0.8769 | 1.1346 | 1.0001 | 0.8808 | 0.9731 | 0.0610 |

|            |        |        |        |        |        |        |
|------------|--------|--------|--------|--------|--------|--------|
| LOC1001301 | 1.0271 | 1.0724 | 0.9714 | 0.8216 | 0.9731 | 0.0546 |
| ATXN2      | 0.7571 | 1.4065 | 0.9938 | 0.7352 | 0.9731 | 0.1559 |
| LOC1001302 | 0.8764 | 1.0540 | 1.0166 | 0.9456 | 0.9731 | 0.0393 |
| LOC646699  | 0.8452 | 1.0944 | 1.0559 | 0.8970 | 0.9731 | 0.0604 |
| WNT7A      | 1.0167 | 1.0038 | 1.0708 | 0.8014 | 0.9731 | 0.0591 |
| MIR1227    | 0.9283 | 0.9781 | 1.0149 | 0.9713 | 0.9731 | 0.0178 |
| SLC25A29   | 0.8961 | 1.1720 | 0.9877 | 0.8368 | 0.9731 | 0.0732 |
| PRKAB2     | 0.9022 | 1.1980 | 1.0041 | 0.7883 | 0.9732 | 0.0869 |
| APOH       | 0.8952 | 1.0648 | 1.0228 | 0.9098 | 0.9732 | 0.0418 |
| FLJ40330   | 0.8664 | 1.1453 | 0.9841 | 0.8968 | 0.9732 | 0.0626 |
| MYF6       | 0.9494 | 1.0496 | 1.0444 | 0.8492 | 0.9732 | 0.0473 |
| LOC1001337 | 0.8885 | 1.1569 | 1.0289 | 0.8184 | 0.9732 | 0.0753 |
| LOC646481  | 1.0116 | 1.0335 | 0.9966 | 0.8510 | 0.9732 | 0.0414 |
| LOC1001320 | 0.9473 | 1.1568 | 1.0056 | 0.7830 | 0.9732 | 0.0772 |
| LOC1001284 | 0.9759 | 1.0304 | 1.0030 | 0.8834 | 0.9732 | 0.0319 |
| LOC729255  | 0.8374 | 1.1571 | 1.2144 | 0.6838 | 0.9732 | 0.1272 |
| PLGLB1     | 0.9273 | 1.0154 | 1.0422 | 0.9078 | 0.9732 | 0.0328 |
| BPIL3      | 0.8926 | 1.1240 | 1.0212 | 0.8550 | 0.9732 | 0.0616 |
| ATAD2B     | 0.7599 | 1.1498 | 1.0391 | 0.9440 | 0.9732 | 0.0826 |
| FLJ10661   | 0.8831 | 1.0804 | 1.0558 | 0.8734 | 0.9732 | 0.0551 |
| LOC285423  | 0.9838 | 0.9311 | 1.0839 | 0.8940 | 0.9732 | 0.0413 |
| TAC1       | 0.8596 | 1.0715 | 1.0064 | 0.9553 | 0.9732 | 0.0447 |
| C21orf58   | 0.9480 | 1.1764 | 0.8715 | 0.8969 | 0.9732 | 0.0696 |
| LOC1001327 | 1.1392 | 0.9570 | 0.9272 | 0.8695 | 0.9732 | 0.0582 |
| MIR885     | 0.9255 | 0.9795 | 0.9811 | 1.0067 | 0.9732 | 0.0171 |
| SLC9A3R2   | 1.0019 | 0.9442 | 1.0314 | 0.9153 | 0.9732 | 0.0265 |
| ESRP2      | 0.9875 | 1.0058 | 1.0394 | 0.8601 | 0.9732 | 0.0392 |
| B3GNT5     | 1.0008 | 1.1137 | 0.9781 | 0.8002 | 0.9732 | 0.0648 |
| DRD5       | 0.9231 | 1.0609 | 1.0354 | 0.8736 | 0.9732 | 0.0447 |
| NNAT       | 0.8694 | 1.0633 | 1.0383 | 0.9220 | 0.9732 | 0.0463 |
| C4A        | 0.9084 | 1.1200 | 1.0559 | 0.8086 | 0.9732 | 0.0705 |
| POU2F2     | 0.9186 | 1.0069 | 1.0478 | 0.9197 | 0.9732 | 0.0323 |
| PSG10      | 0.8691 | 1.1130 | 1.0320 | 0.8788 | 0.9732 | 0.0597 |
| LOC1001331 | 0.8793 | 1.0600 | 1.0428 | 0.9108 | 0.9732 | 0.0457 |
| ABCG5      | 0.8936 | 1.1119 | 1.0575 | 0.8300 | 0.9732 | 0.0666 |
| LOC645739  | 0.9352 | 0.9410 | 1.0943 | 0.9224 | 0.9732 | 0.0406 |
| MCF2L2     | 0.9173 | 1.0337 | 0.9946 | 0.9473 | 0.9732 | 0.0257 |
| PHACTR3    | 0.9728 | 1.0032 | 1.0476 | 0.8693 | 0.9732 | 0.0379 |
| ZNF572     | 1.0075 | 0.9874 | 1.0096 | 0.8885 | 0.9732 | 0.0287 |
| NDUFB2     | 0.9198 | 1.2671 | 0.9886 | 0.7174 | 0.9732 | 0.1136 |
| DACH2      | 0.9698 | 1.0389 | 0.9641 | 0.9202 | 0.9732 | 0.0245 |
| LOC1001285 | 0.8970 | 1.0145 | 1.0301 | 0.9513 | 0.9732 | 0.0306 |
| LOC1001315 | 0.7872 | 1.0580 | 1.0500 | 0.9978 | 0.9732 | 0.0634 |
| OR5AC2     | 0.8507 | 1.1091 | 1.0157 | 0.9175 | 0.9733 | 0.0566 |
| AADACL3    | 0.9226 | 1.0212 | 1.0560 | 0.8933 | 0.9733 | 0.0388 |
| PRY2       | 0.8692 | 1.0686 | 1.0361 | 0.9193 | 0.9733 | 0.0472 |

|            |        |        |        |        |        |        |
|------------|--------|--------|--------|--------|--------|--------|
| CRMP1      | 0.9389 | 1.0583 | 0.9483 | 0.9476 | 0.9733 | 0.0284 |
| LOC654123  | 0.8937 | 1.0931 | 1.0692 | 0.8372 | 0.9733 | 0.0635 |
| LOC644175  | 0.9566 | 1.0349 | 1.0078 | 0.8939 | 0.9733 | 0.0310 |
| LOC654116  | 0.8312 | 1.2776 | 0.9111 | 0.8733 | 0.9733 | 0.1027 |
| LOC645963  | 0.9341 | 1.0109 | 1.0126 | 0.9356 | 0.9733 | 0.0222 |
| GRIK5      | 1.0000 | 1.1121 | 0.9489 | 0.8322 | 0.9733 | 0.0581 |
| ARL11      | 0.9641 | 1.1047 | 0.9364 | 0.8880 | 0.9733 | 0.0465 |
| DBC1       | 1.0868 | 0.9707 | 0.9945 | 0.8413 | 0.9733 | 0.0506 |
| LOC147670  | 0.8457 | 1.0345 | 1.1304 | 0.8826 | 0.9733 | 0.0664 |
| LECT1      | 0.8997 | 1.0854 | 1.0180 | 0.8902 | 0.9733 | 0.0473 |
| KCNQ5      | 0.9197 | 1.0575 | 1.0489 | 0.8671 | 0.9733 | 0.0474 |
| LOC652641  | 1.0550 | 0.9081 | 0.9601 | 0.9701 | 0.9733 | 0.0304 |
| ERG        | 0.9221 | 1.1435 | 0.9521 | 0.8756 | 0.9733 | 0.0589 |
| ZNF703     | 0.9571 | 1.0572 | 0.9698 | 0.9092 | 0.9733 | 0.0309 |
| LOC652097  | 0.9013 | 0.9513 | 1.1318 | 0.9089 | 0.9733 | 0.0540 |
| ZSWIM3     | 0.9215 | 1.1298 | 0.9501 | 0.8920 | 0.9733 | 0.0535 |
| CD27       | 0.9798 | 1.0604 | 1.0224 | 0.8307 | 0.9733 | 0.0503 |
| HCG3       | 0.9776 | 1.0435 | 0.9925 | 0.8798 | 0.9733 | 0.0342 |
| CHST8      | 0.9708 | 1.1537 | 0.9810 | 0.7879 | 0.9733 | 0.0747 |
| MIR889     | 0.9243 | 1.1072 | 0.9534 | 0.9084 | 0.9733 | 0.0456 |
| LOC1001295 | 0.9501 | 1.0911 | 0.8588 | 0.9933 | 0.9733 | 0.0482 |
| KIAA1919   | 0.9967 | 1.0516 | 1.0159 | 0.8291 | 0.9733 | 0.0494 |
| BRF2       | 0.7694 | 1.3982 | 1.0756 | 0.6502 | 0.9733 | 0.1676 |
| LOC643219  | 0.9916 | 1.0579 | 0.9630 | 0.8809 | 0.9733 | 0.0367 |
| TNFAIP6    | 0.9306 | 1.0824 | 0.9510 | 0.9294 | 0.9733 | 0.0367 |
| PRKCB      | 0.9295 | 1.0789 | 1.1028 | 0.7822 | 0.9734 | 0.0744 |
| LOC1001344 | 1.0306 | 0.9407 | 1.0779 | 0.8442 | 0.9734 | 0.0516 |
| SNORA56    | 0.9501 | 1.0679 | 0.9917 | 0.8837 | 0.9734 | 0.0386 |
| PTPN4      | 1.0097 | 1.1685 | 0.9600 | 0.7553 | 0.9734 | 0.0852 |
| C2orf3     | 0.8535 | 1.1685 | 1.0150 | 0.8564 | 0.9734 | 0.0752 |
| DEXI       | 0.9243 | 1.2617 | 1.1009 | 0.6065 | 0.9734 | 0.1404 |
| MT1E       | 0.8752 | 1.0886 | 1.0284 | 0.9013 | 0.9734 | 0.0509 |
| LOC1001316 | 0.9585 | 0.9706 | 1.0417 | 0.9226 | 0.9734 | 0.0250 |
| LOC643365  | 1.0312 | 1.0109 | 0.9372 | 0.9142 | 0.9734 | 0.0282 |
| LOC284379  | 0.9150 | 1.0558 | 1.0182 | 0.9046 | 0.9734 | 0.0376 |
| LOC541469  | 0.9704 | 0.9976 | 1.0495 | 0.8761 | 0.9734 | 0.0364 |
| ZNF304     | 0.9081 | 1.1534 | 1.0924 | 0.7396 | 0.9734 | 0.0937 |
| GNRHR      | 0.9315 | 1.0377 | 1.0488 | 0.8756 | 0.9734 | 0.0420 |
| LOC1001289 | 0.7484 | 1.1498 | 1.1357 | 0.8598 | 0.9734 | 0.1004 |
| LOC731954  | 0.9531 | 1.1247 | 0.9487 | 0.8671 | 0.9734 | 0.0542 |
| NR5A1      | 0.9625 | 1.0242 | 1.0338 | 0.8731 | 0.9734 | 0.0370 |
| LOC1001289 | 1.0711 | 1.0426 | 0.9661 | 0.8139 | 0.9734 | 0.0576 |
| LOC646084  | 0.9733 | 1.0241 | 1.0282 | 0.8681 | 0.9734 | 0.0373 |
| LOC441763  | 0.4214 | 1.1535 | 1.6167 | 0.7021 | 0.9734 | 0.2621 |
| PUM1       | 0.7971 | 1.4104 | 0.9282 | 0.7580 | 0.9734 | 0.1501 |
| LOC642425  | 0.8918 | 1.1348 | 1.0664 | 0.8008 | 0.9734 | 0.0770 |



|            |        |        |        |        |        |        |
|------------|--------|--------|--------|--------|--------|--------|
| LOC728675  | 1.0102 | 0.9723 | 0.9688 | 0.9425 | 0.9734 | 0.0139 |
| tAKR       | 0.9424 | 1.0351 | 1.0129 | 0.9033 | 0.9734 | 0.0306 |
| UGT2A3     | 0.9615 | 1.0842 | 0.9769 | 0.8713 | 0.9735 | 0.0437 |
| LOC728423  | 1.0282 | 1.0234 | 0.9977 | 0.8446 | 0.9735 | 0.0435 |
| RPL7A      | 0.7641 | 1.3308 | 1.1340 | 0.6650 | 0.9735 | 0.1561 |
| LOC644173  | 0.9780 | 1.1018 | 0.9222 | 0.8918 | 0.9735 | 0.0464 |
| LOC646183  | 0.9867 | 0.9731 | 1.0888 | 0.8453 | 0.9735 | 0.0499 |
| FAM83G     | 0.9465 | 0.9735 | 1.0153 | 0.9585 | 0.9735 | 0.0150 |
| LOC730132  | 0.8629 | 1.0573 | 1.0879 | 0.8858 | 0.9735 | 0.0578 |
| MYL2       | 0.8934 | 1.0696 | 1.0131 | 0.9178 | 0.9735 | 0.0412 |
| LOC1001336 | 0.9100 | 1.1250 | 1.0052 | 0.8538 | 0.9735 | 0.0594 |
| LRRC27     | 1.0842 | 1.0280 | 0.9137 | 0.8681 | 0.9735 | 0.0499 |
| LOC646746  | 0.9397 | 1.0284 | 1.0262 | 0.8996 | 0.9735 | 0.0321 |
| MATK       | 1.0015 | 1.0947 | 0.8980 | 0.8998 | 0.9735 | 0.0471 |
| LOC652774  | 1.0254 | 0.9888 | 1.0032 | 0.8765 | 0.9735 | 0.0332 |
| ATP13A5    | 0.8677 | 1.0908 | 1.0247 | 0.9108 | 0.9735 | 0.0513 |
| GPR34      | 0.9123 | 1.0697 | 1.0158 | 0.8962 | 0.9735 | 0.0416 |
| MEG3       | 0.9158 | 1.0504 | 0.9967 | 0.9311 | 0.9735 | 0.0311 |
| LOC648476  | 0.9277 | 1.0466 | 1.0184 | 0.9014 | 0.9735 | 0.0349 |
| MIR130A    | 0.9583 | 1.0226 | 1.0574 | 0.8558 | 0.9735 | 0.0443 |
| C16orf68   | 0.8333 | 1.3029 | 0.9496 | 0.8082 | 0.9735 | 0.1140 |
| LOC645364  | 0.9212 | 1.0875 | 0.9470 | 0.9384 | 0.9735 | 0.0384 |
| LOC1001310 | 0.9527 | 1.1704 | 0.9747 | 0.7964 | 0.9735 | 0.0767 |
| C1orf99    | 0.8538 | 1.0966 | 1.0873 | 0.8564 | 0.9735 | 0.0684 |
| MIR514-2   | 1.1154 | 0.8775 | 1.0619 | 0.8393 | 0.9735 | 0.0678 |
| TRIM16L    | 0.8855 | 1.0209 | 1.0573 | 0.9305 | 0.9735 | 0.0396 |
| FLJ34503   | 0.9639 | 1.0129 | 0.9803 | 0.9371 | 0.9735 | 0.0159 |
| HBD        | 0.8122 | 1.0873 | 1.0492 | 0.9455 | 0.9736 | 0.0616 |
| RANBP17    | 0.9405 | 1.0183 | 1.0598 | 0.8757 | 0.9736 | 0.0409 |
| GJA4       | 0.8607 | 0.9503 | 1.2105 | 0.8728 | 0.9736 | 0.0814 |
| C19orf35   | 0.9321 | 1.1001 | 0.9767 | 0.8854 | 0.9736 | 0.0461 |
| LOC727918  | 0.8692 | 1.0320 | 1.1004 | 0.8928 | 0.9736 | 0.0555 |
| FAM131B    | 0.9453 | 1.0062 | 1.0528 | 0.8900 | 0.9736 | 0.0355 |
| LOC342892  | 0.7923 | 1.1620 | 1.0099 | 0.9302 | 0.9736 | 0.0772 |
| ZNF609     | 0.8061 | 1.2861 | 0.9936 | 0.8085 | 0.9736 | 0.1131 |
| PCDH9      | 0.9076 | 1.0185 | 1.0094 | 0.9589 | 0.9736 | 0.0256 |
| C4orf19    | 0.9214 | 1.1502 | 1.0509 | 0.7719 | 0.9736 | 0.0819 |
| LOC441843  | 0.9575 | 1.0243 | 0.9956 | 0.9170 | 0.9736 | 0.0233 |
| FOXE3      | 0.9641 | 1.0714 | 0.9957 | 0.8632 | 0.9736 | 0.0431 |
| LOC441089  | 0.7710 | 1.4471 | 0.9385 | 0.7378 | 0.9736 | 0.1638 |
| OR4F21     | 0.9794 | 1.0254 | 1.0139 | 0.8758 | 0.9736 | 0.0340 |
| HLA-DOB    | 0.8848 | 1.0879 | 1.0340 | 0.8877 | 0.9736 | 0.0516 |
| LOC653717  | 0.9043 | 0.9810 | 1.0181 | 0.9911 | 0.9736 | 0.0244 |
| MYL6       | 0.8344 | 1.3197 | 1.0061 | 0.7343 | 0.9736 | 0.1283 |
| LOC649999  | 1.0333 | 1.2007 | 0.9449 | 0.7156 | 0.9736 | 0.1010 |
| SETD1A     | 0.9241 | 1.2570 | 0.9241 | 0.7894 | 0.9736 | 0.0996 |

|            |        |        |        |        |        |        |
|------------|--------|--------|--------|--------|--------|--------|
| LOC1001286 | 0.8506 | 1.0620 | 1.0262 | 0.9558 | 0.9736 | 0.0466 |
| LOC1001312 | 0.8683 | 1.0822 | 0.9815 | 0.9626 | 0.9736 | 0.0438 |
| LOC728813  | 0.9250 | 1.0095 | 1.0741 | 0.8859 | 0.9736 | 0.0423 |
| LOC1001323 | 0.9245 | 1.0415 | 1.0435 | 0.8850 | 0.9736 | 0.0406 |
| ACVR2B     | 0.9224 | 1.1022 | 0.9767 | 0.8933 | 0.9736 | 0.0462 |
| SPON2      | 0.8245 | 1.4151 | 0.8855 | 0.7694 | 0.9736 | 0.1490 |
| LOC1001321 | 0.9018 | 1.1059 | 0.9573 | 0.9295 | 0.9736 | 0.0455 |
| OTC        | 0.8954 | 1.0746 | 1.0341 | 0.8906 | 0.9737 | 0.0473 |
| TTY17B     | 0.8460 | 1.0668 | 1.0445 | 0.9374 | 0.9737 | 0.0511 |
| LOC1001330 | 0.8804 | 1.0516 | 1.0170 | 0.9456 | 0.9737 | 0.0381 |
| OTOP3      | 1.0036 | 1.0195 | 0.9856 | 0.8860 | 0.9737 | 0.0300 |
| SLC38A11   | 0.9522 | 1.0614 | 1.0314 | 0.8497 | 0.9737 | 0.0473 |
| ATP12A     | 1.0315 | 1.0796 | 0.9481 | 0.8355 | 0.9737 | 0.0535 |
| DMRT2      | 0.9931 | 1.0409 | 0.9731 | 0.8876 | 0.9737 | 0.0320 |
| LOC653891  | 1.0260 | 1.0368 | 1.0285 | 0.8034 | 0.9737 | 0.0568 |
| SYNPR      | 0.8910 | 0.9655 | 1.0941 | 0.9441 | 0.9737 | 0.0431 |
| ATHL1      | 0.9752 | 1.0517 | 0.9771 | 0.8907 | 0.9737 | 0.0329 |
| MIR518F    | 0.8741 | 1.0504 | 0.9746 | 0.9957 | 0.9737 | 0.0368 |
| LOC650520  | 0.9486 | 1.0392 | 0.9775 | 0.9295 | 0.9737 | 0.0240 |
| CCDC144A   | 0.9257 | 1.1123 | 0.9542 | 0.9026 | 0.9737 | 0.0474 |
| LOC727945  | 0.9198 | 1.0414 | 1.0193 | 0.9143 | 0.9737 | 0.0330 |
| NACA2      | 1.1204 | 1.0307 | 0.8499 | 0.8938 | 0.9737 | 0.0622 |
| OVOL1      | 0.8925 | 1.0577 | 1.0116 | 0.9330 | 0.9737 | 0.0374 |
| LOC1001336 | 0.8479 | 1.2647 | 1.0409 | 0.7414 | 0.9737 | 0.1151 |
| IFNE       | 0.9909 | 1.1219 | 0.8726 | 0.9095 | 0.9737 | 0.0552 |
| LOC652094  | 0.9131 | 0.8427 | 1.0707 | 1.0683 | 0.9737 | 0.0571 |
| FAM107B    | 0.8713 | 1.3860 | 1.0119 | 0.6256 | 0.9737 | 0.1589 |
| EMX2       | 0.8719 | 1.0944 | 1.0201 | 0.9084 | 0.9737 | 0.0511 |
| LOC643318  | 0.9788 | 1.0157 | 1.0555 | 0.8448 | 0.9737 | 0.0457 |
| LOC727868  | 0.9101 | 1.1090 | 1.0025 | 0.8732 | 0.9737 | 0.0527 |
| LOC653324  | 0.9904 | 0.9856 | 1.0016 | 0.9172 | 0.9737 | 0.0191 |
| NRG1       | 0.9478 | 1.0402 | 0.9943 | 0.9127 | 0.9737 | 0.0277 |
| RBMX1E     | 0.9519 | 1.0932 | 0.9556 | 0.8943 | 0.9737 | 0.0422 |
| HNRNPUL1   | 0.9309 | 1.1338 | 1.1007 | 0.7296 | 0.9738 | 0.0927 |
| TMEM156    | 0.8840 | 1.0538 | 1.1120 | 0.8451 | 0.9738 | 0.0646 |
| WNT11      | 0.9468 | 1.0662 | 0.9558 | 0.9262 | 0.9738 | 0.0314 |
| MIR1255B1  | 0.9547 | 1.0790 | 0.9828 | 0.8785 | 0.9738 | 0.0414 |
| LOC653254  | 0.8833 | 1.1599 | 1.0216 | 0.8301 | 0.9738 | 0.0740 |
| LOC1001290 | 0.9610 | 1.0266 | 0.9936 | 0.9139 | 0.9738 | 0.0240 |
| AGAP1      | 0.9960 | 1.0544 | 1.0031 | 0.8415 | 0.9738 | 0.0460 |
| KRTAP9-5   | 0.9420 | 1.1108 | 0.9921 | 0.8502 | 0.9738 | 0.0543 |
| LOC649416  | 0.9570 | 1.1159 | 0.9236 | 0.8985 | 0.9738 | 0.0489 |
| NPTX1      | 0.8553 | 1.0881 | 0.9945 | 0.9571 | 0.9738 | 0.0482 |
| LOC729121  | 0.8697 | 1.0494 | 1.0606 | 0.9154 | 0.9738 | 0.0479 |
| DCUN1D2    | 0.9420 | 1.1052 | 0.9847 | 0.8632 | 0.9738 | 0.0505 |
| LOC1001337 | 0.8862 | 1.1503 | 0.9809 | 0.8777 | 0.9738 | 0.0633 |

|            |        |        |        |        |        |        |
|------------|--------|--------|--------|--------|--------|--------|
| FAM169A    | 0.9838 | 1.0531 | 1.0163 | 0.8419 | 0.9738 | 0.0462 |
| LOC646897  | 0.8671 | 1.0516 | 1.0171 | 0.9593 | 0.9738 | 0.0404 |
| LOC654032  | 0.9769 | 1.0440 | 0.9561 | 0.9181 | 0.9738 | 0.0264 |
| LOC641820  | 0.8765 | 1.1792 | 1.0148 | 0.8246 | 0.9738 | 0.0794 |
| AQP5       | 1.0115 | 0.9249 | 0.9772 | 0.9816 | 0.9738 | 0.0180 |
| IFNA6      | 0.9379 | 1.0529 | 0.9404 | 0.9640 | 0.9738 | 0.0270 |
| LOC1001302 | 1.0863 | 0.9205 | 1.0083 | 0.8800 | 0.9738 | 0.0461 |
| LOC642980  | 0.9102 | 1.1134 | 0.9963 | 0.8754 | 0.9738 | 0.0530 |
| LOC643596  | 0.9134 | 1.0809 | 1.0105 | 0.8905 | 0.9738 | 0.0442 |
| BEST2      | 0.9458 | 1.0045 | 1.0936 | 0.8513 | 0.9738 | 0.0509 |
| GRAP       | 0.9628 | 1.0548 | 1.0147 | 0.8629 | 0.9738 | 0.0415 |
| LOC647958  | 0.8857 | 1.0605 | 1.0630 | 0.8860 | 0.9738 | 0.0508 |
| COX4I2     | 0.9278 | 1.0634 | 0.9842 | 0.9199 | 0.9738 | 0.0331 |
| LOC653555  | 0.9498 | 1.0164 | 1.0909 | 0.8381 | 0.9738 | 0.0536 |
| LOC646034  | 0.9405 | 1.1471 | 0.9710 | 0.8367 | 0.9738 | 0.0645 |
| P76        | 0.8897 | 1.1075 | 1.0220 | 0.8762 | 0.9738 | 0.0554 |
| LOC642384  | 0.8467 | 1.1358 | 0.9923 | 0.9205 | 0.9738 | 0.0616 |
| LOC650363  | 0.9016 | 1.1203 | 0.9539 | 0.9195 | 0.9738 | 0.0500 |
| GUCY2C     | 0.9001 | 1.0731 | 0.9935 | 0.9286 | 0.9738 | 0.0384 |
| LOC653648  | 0.9318 | 1.0987 | 1.0004 | 0.8644 | 0.9738 | 0.0500 |
| LOC440776  | 1.0530 | 1.0963 | 0.9940 | 0.7521 | 0.9739 | 0.0768 |
| LOC1001306 | 0.7687 | 1.1076 | 1.0229 | 0.9962 | 0.9739 | 0.0724 |
| HES7       | 0.9741 | 1.0134 | 1.0154 | 0.8925 | 0.9739 | 0.0287 |
| IL31       | 0.9155 | 1.2053 | 0.9484 | 0.8262 | 0.9739 | 0.0814 |
| LOC1001318 | 0.9236 | 1.0177 | 1.0751 | 0.8791 | 0.9739 | 0.0444 |
| RPP38      | 0.8413 | 1.2408 | 1.0205 | 0.7928 | 0.9739 | 0.1016 |
| APOM       | 0.9852 | 1.1262 | 0.9177 | 0.8663 | 0.9739 | 0.0563 |
| C21orf130  | 0.8545 | 1.0687 | 1.0421 | 0.9301 | 0.9739 | 0.0498 |
| LOC647174  | 0.8103 | 1.0665 | 1.1618 | 0.8568 | 0.9739 | 0.0839 |
| LASS3      | 0.9696 | 1.1112 | 0.9256 | 0.8892 | 0.9739 | 0.0486 |
| C3orf52    | 0.9666 | 1.0921 | 0.9749 | 0.8619 | 0.9739 | 0.0470 |
| RPGRIP1    | 0.9476 | 1.1067 | 0.9289 | 0.9124 | 0.9739 | 0.0449 |
| ZNF608     | 0.9608 | 1.1077 | 0.9703 | 0.8567 | 0.9739 | 0.0515 |
| LOC1001319 | 0.9217 | 1.0565 | 1.0152 | 0.9023 | 0.9739 | 0.0370 |
| MUSTN1     | 0.9420 | 1.0219 | 1.0379 | 0.8938 | 0.9739 | 0.0340 |
| PABPC3     | 0.9079 | 1.1105 | 1.1326 | 0.7446 | 0.9739 | 0.0916 |
| LOC649452  | 0.9436 | 1.0138 | 0.9790 | 0.9592 | 0.9739 | 0.0151 |
| LOC645418  | 0.8210 | 1.0308 | 1.1317 | 0.9121 | 0.9739 | 0.0679 |
| LOC643123  | 0.9239 | 1.1239 | 1.0380 | 0.8098 | 0.9739 | 0.0683 |
| LOC1001344 | 0.8487 | 1.1124 | 1.0346 | 0.9000 | 0.9739 | 0.0606 |
| KRTAP2-2   | 0.9899 | 1.0707 | 0.9416 | 0.8934 | 0.9739 | 0.0378 |
| MIR584     | 0.8608 | 1.0808 | 1.1447 | 0.8093 | 0.9739 | 0.0819 |
| LOC1001326 | 0.9210 | 0.9682 | 1.0386 | 0.9679 | 0.9739 | 0.0243 |
| LOC648169  | 0.9987 | 0.9859 | 1.0312 | 0.8799 | 0.9739 | 0.0327 |
| ABHD14B    | 0.8278 | 1.2599 | 1.0225 | 0.7855 | 0.9739 | 0.1084 |
| LIPJ       | 0.9227 | 1.0662 | 1.0372 | 0.8696 | 0.9739 | 0.0466 |

|            |        |        |        |        |        |        |
|------------|--------|--------|--------|--------|--------|--------|
| LOC643926  | 0.8524 | 1.1694 | 0.9854 | 0.8886 | 0.9739 | 0.0710 |
| LOC647479  | 0.8953 | 1.0657 | 1.0275 | 0.9073 | 0.9739 | 0.0427 |
| LOC650325  | 0.8010 | 1.1202 | 1.0592 | 0.9154 | 0.9739 | 0.0719 |
| TPCN1      | 0.8378 | 1.0071 | 1.0432 | 1.0078 | 0.9739 | 0.0462 |
| CABP7      | 0.8540 | 1.1386 | 0.9359 | 0.9674 | 0.9740 | 0.0599 |
| CDO1       | 0.8925 | 1.1222 | 1.0078 | 0.8733 | 0.9740 | 0.0577 |
| LOC1001316 | 0.9963 | 1.1153 | 0.9402 | 0.8440 | 0.9740 | 0.0567 |
| TCEANC     | 0.9794 | 1.2079 | 0.9776 | 0.7310 | 0.9740 | 0.0974 |
| LOC399940  | 0.9461 | 1.1267 | 0.9796 | 0.8434 | 0.9740 | 0.0586 |
| LOC650528  | 0.8164 | 1.0639 | 1.0446 | 0.9710 | 0.9740 | 0.0562 |
| LOC642714  | 0.8974 | 1.1377 | 0.9921 | 0.8687 | 0.9740 | 0.0606 |
| LOC648040  | 0.8413 | 1.0279 | 1.0302 | 0.9964 | 0.9740 | 0.0449 |
| PRPS1L1    | 0.9306 | 1.0506 | 1.0364 | 0.8782 | 0.9740 | 0.0417 |
| C17orf57   | 0.8892 | 1.0583 | 0.9755 | 0.9728 | 0.9740 | 0.0345 |
| WDR64      | 0.9456 | 1.0694 | 0.9622 | 0.9187 | 0.9740 | 0.0330 |
| ABCC11     | 0.9535 | 1.0775 | 1.0245 | 0.8405 | 0.9740 | 0.0512 |
| RTN4RL2    | 1.0739 | 1.0281 | 0.8863 | 0.9077 | 0.9740 | 0.0456 |
| LOC730546  | 0.9588 | 1.0442 | 0.9924 | 0.9005 | 0.9740 | 0.0301 |
| SALL1      | 0.9878 | 1.0214 | 0.9918 | 0.8949 | 0.9740 | 0.0274 |
| GPR109A    | 1.0313 | 0.9915 | 0.9660 | 0.9072 | 0.9740 | 0.0260 |
| MVK        | 1.0715 | 1.1630 | 0.9153 | 0.7461 | 0.9740 | 0.0916 |
| C17orf98   | 0.8751 | 1.1801 | 0.9326 | 0.9082 | 0.9740 | 0.0697 |
| LOC642591  | 0.8870 | 1.0633 | 0.9296 | 1.0161 | 0.9740 | 0.0401 |
| PLEKHG4    | 0.8812 | 1.0763 | 1.1027 | 0.8359 | 0.9740 | 0.0675 |
| LOC1001315 | 0.8149 | 1.1893 | 0.9353 | 0.9566 | 0.9740 | 0.0782 |
| LOC643869  | 0.9566 | 1.0030 | 1.0111 | 0.9253 | 0.9740 | 0.0202 |
| LOC653574  | 0.8633 | 1.0977 | 0.9535 | 0.9816 | 0.9740 | 0.0483 |
| LOC1001283 | 0.9233 | 1.0580 | 1.0147 | 0.9003 | 0.9740 | 0.0373 |
| MIR138-2   | 0.8649 | 1.0438 | 1.0643 | 0.9232 | 0.9740 | 0.0479 |
| LOC340069  | 0.8268 | 1.1449 | 1.0732 | 0.8513 | 0.9741 | 0.0795 |
| LOC653625  | 0.7889 | 1.2308 | 0.9235 | 0.9530 | 0.9741 | 0.0928 |
| LOC647862  | 1.0006 | 0.9453 | 1.0507 | 0.8996 | 0.9741 | 0.0329 |
| PDZD3      | 0.9323 | 1.0709 | 1.0153 | 0.8777 | 0.9741 | 0.0429 |
| DUOX1      | 0.9477 | 1.0275 | 1.0356 | 0.8854 | 0.9741 | 0.0356 |
| B3GALT1    | 0.9740 | 1.0758 | 0.9704 | 0.8761 | 0.9741 | 0.0408 |
| LOC646363  | 0.9202 | 1.0671 | 0.9506 | 0.9584 | 0.9741 | 0.0321 |
| MYO1B      | 0.8754 | 1.1848 | 1.0176 | 0.8185 | 0.9741 | 0.0818 |
| RPL14L     | 0.6992 | 1.3176 | 1.1460 | 0.7334 | 0.9741 | 0.1530 |
| PRAMEF20   | 0.9287 | 1.0814 | 0.9672 | 0.9190 | 0.9741 | 0.0372 |
| C22orf23   | 1.0123 | 1.0944 | 0.9588 | 0.8309 | 0.9741 | 0.0553 |
| OR52K1     | 0.8936 | 1.0801 | 1.0262 | 0.8965 | 0.9741 | 0.0470 |
| AQP2       | 0.8665 | 1.1532 | 0.9979 | 0.8788 | 0.9741 | 0.0666 |
| LOC645135  | 0.8649 | 1.0962 | 0.9586 | 0.9767 | 0.9741 | 0.0475 |
| WHAMML1    | 0.9140 | 1.0577 | 0.9953 | 0.9294 | 0.9741 | 0.0330 |
| LOC1001319 | 0.9439 | 1.1484 | 0.9518 | 0.8524 | 0.9741 | 0.0623 |
| SUSD5      | 0.9071 | 1.0938 | 0.9138 | 0.9817 | 0.9741 | 0.0433 |

|            |        |        |        |        |        |        |
|------------|--------|--------|--------|--------|--------|--------|
| LOC645306  | 1.0465 | 1.0355 | 0.9536 | 0.8608 | 0.9741 | 0.0431 |
| LOC1001282 | 0.9511 | 1.0725 | 0.9709 | 0.9020 | 0.9741 | 0.0358 |
| LOC645651  | 0.9021 | 1.0863 | 1.0711 | 0.8369 | 0.9741 | 0.0619 |
| PI4KA      | 0.9981 | 1.1092 | 0.9753 | 0.8139 | 0.9741 | 0.0609 |
| ABAT       | 0.9103 | 1.1836 | 1.0605 | 0.7421 | 0.9741 | 0.0954 |
| UPK1B      | 0.8258 | 0.9999 | 1.0690 | 1.0017 | 0.9741 | 0.0520 |
| AMMECR1L   | 0.9787 | 1.1696 | 1.0214 | 0.7269 | 0.9741 | 0.0920 |
| LOC402279  | 0.9303 | 1.0446 | 0.9668 | 0.9548 | 0.9741 | 0.0247 |
| CLIP3      | 0.9212 | 1.1760 | 0.9516 | 0.8477 | 0.9741 | 0.0707 |
| RAB9B      | 0.8849 | 1.0562 | 1.1073 | 0.8482 | 0.9741 | 0.0634 |
| LOC1001306 | 0.9883 | 1.0564 | 1.0313 | 0.8206 | 0.9741 | 0.0531 |
| NDST4      | 0.9222 | 1.0080 | 0.9921 | 0.9743 | 0.9742 | 0.0186 |
| LOC1001290 | 0.8707 | 1.0235 | 1.0963 | 0.9061 | 0.9742 | 0.0522 |
| LOC641905  | 0.8924 | 1.1792 | 0.9664 | 0.8586 | 0.9742 | 0.0720 |
| LOC1001331 | 0.9065 | 1.2009 | 0.9497 | 0.8395 | 0.9742 | 0.0789 |
| LOC441420  | 0.9231 | 1.0521 | 0.9750 | 0.9465 | 0.9742 | 0.0281 |
| A2M        | 0.9824 | 1.0438 | 0.9553 | 0.9153 | 0.9742 | 0.0270 |
| LOC646569  | 0.8835 | 1.1178 | 1.0849 | 0.8104 | 0.9742 | 0.0752 |
| MAGEB4     | 0.8909 | 1.0709 | 1.0057 | 0.9293 | 0.9742 | 0.0401 |
| LOC643444  | 0.9017 | 1.0822 | 1.0504 | 0.8624 | 0.9742 | 0.0542 |
| SNORD15A   | 0.9348 | 1.0480 | 1.0275 | 0.8865 | 0.9742 | 0.0382 |
| LOC648665  | 0.9275 | 1.1068 | 0.9863 | 0.8761 | 0.9742 | 0.0496 |
| LOC645565  | 0.9631 | 1.0222 | 1.0295 | 0.8819 | 0.9742 | 0.0341 |
| LOC1001337 | 0.9310 | 1.0539 | 0.9309 | 0.9809 | 0.9742 | 0.0291 |
| LOC644611  | 0.9331 | 1.0880 | 1.0439 | 0.8318 | 0.9742 | 0.0576 |
| SCNN1B     | 0.9057 | 1.0656 | 1.0316 | 0.8939 | 0.9742 | 0.0436 |
| MIR325     | 0.9263 | 1.0560 | 0.9552 | 0.9592 | 0.9742 | 0.0282 |
| ODZ2       | 0.9211 | 1.1110 | 0.9087 | 0.9560 | 0.9742 | 0.0467 |
| OR51F1     | 0.9097 | 1.0545 | 1.0224 | 0.9102 | 0.9742 | 0.0377 |
| ALKBH1     | 0.8628 | 1.3148 | 0.9864 | 0.7328 | 0.9742 | 0.1248 |
| MC5R       | 0.9443 | 1.1349 | 0.9070 | 0.9106 | 0.9742 | 0.0542 |
| LOC645974  | 0.8734 | 1.1352 | 0.9758 | 0.9124 | 0.9742 | 0.0577 |
| LOC51145   | 0.9193 | 1.0719 | 1.0239 | 0.8817 | 0.9742 | 0.0443 |
| ERCC-00096 | 0.9713 | 0.9559 | 1.0208 | 0.9488 | 0.9742 | 0.0162 |
| LOC647008  | 0.9163 | 1.0925 | 0.9966 | 0.8915 | 0.9742 | 0.0454 |
| CBWD2      | 0.9572 | 1.0187 | 1.0204 | 0.9006 | 0.9742 | 0.0286 |
| MIR557     | 0.8188 | 1.2280 | 0.9880 | 0.8621 | 0.9742 | 0.0919 |
| LRTM2      | 0.9244 | 1.1849 | 0.9006 | 0.8871 | 0.9742 | 0.0706 |
| MAGEA8     | 0.9562 | 1.0667 | 1.0303 | 0.8437 | 0.9742 | 0.0492 |
| TBC1D29    | 0.8791 | 1.0096 | 1.0592 | 0.9491 | 0.9742 | 0.0389 |
| LOC643692  | 0.9149 | 0.9882 | 1.0555 | 0.9383 | 0.9742 | 0.0311 |
| LOC1001338 | 0.9839 | 1.1035 | 0.8741 | 0.9354 | 0.9742 | 0.0486 |
| FLJ41170   | 0.8322 | 1.1431 | 0.9451 | 0.9765 | 0.9742 | 0.0642 |
| NLRC3      | 1.0395 | 1.0784 | 1.0065 | 0.7726 | 0.9742 | 0.0688 |
| LOC338651  | 0.9917 | 1.0650 | 0.9771 | 0.8632 | 0.9743 | 0.0417 |
| LOC1001309 | 0.9479 | 1.0008 | 1.0247 | 0.9236 | 0.9743 | 0.0233 |

|            |        |        |        |        |        |        |
|------------|--------|--------|--------|--------|--------|--------|
| LOC145845  | 1.0051 | 1.0517 | 1.0222 | 0.8181 | 0.9743 | 0.0529 |
| TRIM69     | 1.0118 | 1.0375 | 0.9718 | 0.8760 | 0.9743 | 0.0354 |
| LOC392583  | 0.9642 | 0.9617 | 1.0744 | 0.8968 | 0.9743 | 0.0368 |
| LOC643203  | 0.9175 | 1.0810 | 0.9848 | 0.9138 | 0.9743 | 0.0391 |
| SLC26A6    | 1.0002 | 1.1944 | 0.8642 | 0.8383 | 0.9743 | 0.0815 |
| LOC388814  | 0.9253 | 0.9959 | 1.0212 | 0.9547 | 0.9743 | 0.0213 |
| PIK3CA     | 0.9540 | 0.9718 | 1.0682 | 0.9031 | 0.9743 | 0.0345 |
| LOC650253  | 0.9402 | 1.0179 | 0.9884 | 0.9506 | 0.9743 | 0.0178 |
| NFYA       | 1.0528 | 1.1244 | 0.8602 | 0.8598 | 0.9743 | 0.0676 |
| PGA3       | 0.9105 | 1.1058 | 0.9927 | 0.8882 | 0.9743 | 0.0492 |
| LOC729426  | 0.8159 | 1.1220 | 1.0678 | 0.8914 | 0.9743 | 0.0722 |
| ARPC1B     | 1.0177 | 1.2137 | 0.8835 | 0.7823 | 0.9743 | 0.0932 |
| MCHR2      | 0.9992 | 1.0545 | 0.9164 | 0.9270 | 0.9743 | 0.0325 |
| BTG4       | 0.9632 | 0.9634 | 1.0726 | 0.8980 | 0.9743 | 0.0362 |
| LOC642538  | 0.9926 | 0.9948 | 0.9485 | 0.9613 | 0.9743 | 0.0115 |
| LOC202459  | 1.0086 | 1.0656 | 1.0142 | 0.8088 | 0.9743 | 0.0566 |
| SLC10A4    | 0.9490 | 1.0666 | 0.9537 | 0.9279 | 0.9743 | 0.0313 |
| LOC286076  | 0.9062 | 1.0291 | 1.0000 | 0.9619 | 0.9743 | 0.0265 |
| CD300C     | 0.8849 | 1.0254 | 1.0110 | 0.9760 | 0.9743 | 0.0316 |
| LOC652451  | 0.9237 | 1.0763 | 0.9070 | 0.9904 | 0.9743 | 0.0385 |
| LOC1001330 | 0.8311 | 0.9827 | 1.1598 | 0.9238 | 0.9743 | 0.0692 |
| CAV1       | 0.9820 | 1.0677 | 0.9356 | 0.9121 | 0.9743 | 0.0343 |
| FLJ10088   | 1.0215 | 1.0064 | 0.9571 | 0.9124 | 0.9743 | 0.0248 |
| C14orf53   | 0.7668 | 1.1377 | 1.1178 | 0.8752 | 0.9743 | 0.0914 |
| NAP1L6     | 0.9211 | 1.1671 | 0.8746 | 0.9345 | 0.9743 | 0.0655 |
| ZNF804B    | 0.8508 | 1.0385 | 1.0382 | 0.9699 | 0.9744 | 0.0442 |
| LOC1001280 | 0.9491 | 0.9922 | 1.0743 | 0.8818 | 0.9744 | 0.0403 |
| LOC149069  | 0.9194 | 1.1071 | 0.9653 | 0.9056 | 0.9744 | 0.0460 |
| MIR524     | 0.9449 | 0.9596 | 1.0061 | 0.9868 | 0.9744 | 0.0137 |
| NOTCH4     | 0.9272 | 1.0306 | 1.0008 | 0.9388 | 0.9744 | 0.0247 |
| RASAL1     | 0.8927 | 1.1345 | 1.0226 | 0.8476 | 0.9744 | 0.0650 |
| LOC651040  | 0.9056 | 1.1255 | 0.9783 | 0.8880 | 0.9744 | 0.0540 |
| STARD9     | 0.8804 | 1.1170 | 0.9946 | 0.9055 | 0.9744 | 0.0535 |
| GOSR2      | 0.8728 | 1.1853 | 1.0427 | 0.7967 | 0.9744 | 0.0871 |
| CPA6       | 0.9114 | 1.0262 | 1.0239 | 0.9361 | 0.9744 | 0.0297 |
| GPAT2      | 0.9593 | 1.0906 | 1.0144 | 0.8332 | 0.9744 | 0.0542 |
| PRAME      | 0.8708 | 1.3934 | 0.9019 | 0.7315 | 0.9744 | 0.1445 |
| MMP19      | 1.0040 | 0.9767 | 0.9795 | 0.9374 | 0.9744 | 0.0138 |
| TRPV4      | 0.8766 | 1.0539 | 1.0375 | 0.9295 | 0.9744 | 0.0427 |
| EFEMP1     | 0.8757 | 1.0607 | 1.0212 | 0.9400 | 0.9744 | 0.0414 |
| LOC1001318 | 0.9550 | 1.0618 | 1.0065 | 0.8742 | 0.9744 | 0.0399 |
| C9orf139   | 1.0089 | 0.9934 | 0.9631 | 0.9322 | 0.9744 | 0.0170 |
| MIR199A1   | 0.8927 | 1.1466 | 1.0353 | 0.8230 | 0.9744 | 0.0724 |
| PPP1R1B    | 0.9270 | 1.0463 | 1.0027 | 0.9216 | 0.9744 | 0.0303 |
| LOC1001302 | 0.9048 | 1.0952 | 1.0955 | 0.8022 | 0.9744 | 0.0729 |
| KRT16      | 0.9636 | 1.0591 | 0.9959 | 0.8791 | 0.9744 | 0.0375 |

|             |        |        |        |        |        |        |
|-------------|--------|--------|--------|--------|--------|--------|
| PAX8        | 0.9085 | 1.1674 | 0.9431 | 0.8786 | 0.9744 | 0.0657 |
| LOC642741   | 0.9761 | 0.9778 | 1.0999 | 0.8439 | 0.9744 | 0.0523 |
| CAMKK1      | 0.9611 | 1.0650 | 0.9433 | 0.9283 | 0.9744 | 0.0309 |
| LOC284701   | 0.8904 | 1.1036 | 0.9980 | 0.9058 | 0.9744 | 0.0492 |
| LOC648876   | 0.9690 | 1.1894 | 0.9793 | 0.7601 | 0.9744 | 0.0876 |
| MIR425      | 0.9432 | 1.0610 | 1.0993 | 0.7942 | 0.9744 | 0.0687 |
| PDAP1       | 0.9657 | 1.1066 | 1.0464 | 0.7791 | 0.9744 | 0.0712 |
| LOC649139   | 0.9617 | 1.1476 | 0.9815 | 0.8070 | 0.9744 | 0.0697 |
| MIR654      | 0.9612 | 1.0477 | 0.9903 | 0.8986 | 0.9745 | 0.0310 |
| LOC650985   | 0.9403 | 1.1399 | 1.0571 | 0.7606 | 0.9745 | 0.0822 |
| SERPINB3    | 0.8953 | 1.0403 | 1.0825 | 0.8798 | 0.9745 | 0.0510 |
| EGF         | 0.8704 | 1.1271 | 1.0598 | 0.8406 | 0.9745 | 0.0703 |
| LOC151658   | 0.9089 | 1.0106 | 1.0359 | 0.9426 | 0.9745 | 0.0294 |
| OIT3        | 0.8739 | 1.1331 | 0.9894 | 0.9015 | 0.9745 | 0.0583 |
| OR5F1       | 0.8635 | 1.0926 | 0.9815 | 0.9602 | 0.9745 | 0.0470 |
| GRXCR2      | 0.9363 | 1.0598 | 0.9314 | 0.9705 | 0.9745 | 0.0297 |
| LOC646529   | 0.9332 | 1.1051 | 0.9866 | 0.8731 | 0.9745 | 0.0493 |
| LOC1001297  | 0.9522 | 0.9975 | 0.9849 | 0.9634 | 0.9745 | 0.0102 |
| IGSF6       | 0.9515 | 1.0166 | 1.0193 | 0.9106 | 0.9745 | 0.0264 |
| LOC644262   | 0.9828 | 1.0024 | 1.0654 | 0.8474 | 0.9745 | 0.0459 |
| LOC1001337  | 0.9685 | 1.0708 | 0.9906 | 0.8682 | 0.9745 | 0.0417 |
| LOC730087   | 0.8906 | 1.0353 | 1.0998 | 0.8723 | 0.9745 | 0.0554 |
| ERCC-00165  | 0.9777 | 1.0563 | 1.0895 | 0.7744 | 0.9745 | 0.0707 |
| LOC647374   | 0.9526 | 0.9706 | 1.0871 | 0.8877 | 0.9745 | 0.0415 |
| LOC728819   | 0.9690 | 1.0654 | 0.9561 | 0.9077 | 0.9745 | 0.0330 |
| LOC649641   | 0.9182 | 1.0520 | 1.0386 | 0.8893 | 0.9745 | 0.0414 |
| ERCC-00075  | 0.9838 | 1.0731 | 0.9960 | 0.8452 | 0.9745 | 0.0474 |
| DKFZp686J05 | 0.9727 | 1.0483 | 1.0041 | 0.8730 | 0.9745 | 0.0372 |
| OR2A7       | 0.8803 | 1.0616 | 0.9836 | 0.9726 | 0.9745 | 0.0371 |
| LOC651506   | 0.8121 | 1.1100 | 1.0669 | 0.9091 | 0.9745 | 0.0693 |
| MIR100      | 0.9450 | 1.0717 | 0.9389 | 0.9426 | 0.9745 | 0.0324 |
| ANKRD23     | 0.8700 | 1.1083 | 1.0020 | 0.9179 | 0.9745 | 0.0523 |
| SLC4A11     | 0.9557 | 1.1576 | 0.9806 | 0.8042 | 0.9745 | 0.0724 |
| LOC1001342  | 1.0134 | 1.0720 | 0.9013 | 0.9115 | 0.9745 | 0.0412 |
| NRK         | 0.9149 | 1.2010 | 0.9292 | 0.8530 | 0.9745 | 0.0773 |
| MAP6        | 0.9677 | 1.0390 | 1.0422 | 0.8493 | 0.9745 | 0.0452 |
| LOC643533   | 0.9145 | 1.0431 | 1.0410 | 0.8996 | 0.9745 | 0.0391 |
| NRAP        | 0.9344 | 1.0124 | 1.0371 | 0.9143 | 0.9745 | 0.0297 |
| LOC644347   | 0.9728 | 1.0845 | 0.9393 | 0.9016 | 0.9745 | 0.0394 |
| LOC729956   | 0.9987 | 1.1178 | 0.8968 | 0.8849 | 0.9746 | 0.0541 |
| LOC647099   | 0.9600 | 1.2308 | 0.9681 | 0.7394 | 0.9746 | 0.1005 |
| MLC1        | 0.8991 | 1.0389 | 1.0442 | 0.9160 | 0.9746 | 0.0389 |
| PRKCE       | 0.9416 | 1.1540 | 0.9278 | 0.8748 | 0.9746 | 0.0615 |
| LOC728919   | 0.8859 | 0.9833 | 1.0953 | 0.9338 | 0.9746 | 0.0449 |
| LOC389852   | 0.9236 | 1.0538 | 0.9823 | 0.9386 | 0.9746 | 0.0292 |
| HMP19       | 0.9020 | 1.0871 | 1.0306 | 0.8787 | 0.9746 | 0.0502 |

|            |        |        |        |        |        |        |
|------------|--------|--------|--------|--------|--------|--------|
| LOC1001325 | 0.9091 | 1.1468 | 1.0055 | 0.8369 | 0.9746 | 0.0670 |
| LOC653587  | 0.9502 | 1.1392 | 0.9957 | 0.8133 | 0.9746 | 0.0672 |
| LOC728599  | 0.8754 | 1.1269 | 0.9976 | 0.8985 | 0.9746 | 0.0573 |
| LOC651898  | 0.9380 | 0.9985 | 1.0741 | 0.8877 | 0.9746 | 0.0402 |
| MTMR1      | 0.9213 | 1.0894 | 0.9525 | 0.9352 | 0.9746 | 0.0388 |
| ARNT2      | 1.0124 | 1.1438 | 0.9328 | 0.8094 | 0.9746 | 0.0702 |
| EPO        | 0.9297 | 1.0111 | 0.9839 | 0.9736 | 0.9746 | 0.0169 |
| LOC285588  | 0.8351 | 1.1260 | 1.0463 | 0.8909 | 0.9746 | 0.0674 |
| LNK1       | 0.9678 | 1.1586 | 0.8975 | 0.8745 | 0.9746 | 0.0645 |
| TNNI2      | 0.9810 | 0.9654 | 0.9926 | 0.9594 | 0.9746 | 0.0075 |
| PLA2G3     | 0.8863 | 1.0994 | 0.9166 | 0.9961 | 0.9746 | 0.0476 |
| GPR97      | 0.9255 | 1.0523 | 0.9810 | 0.9396 | 0.9746 | 0.0284 |
| LOC138864  | 0.8865 | 1.0908 | 0.9746 | 0.9465 | 0.9746 | 0.0429 |
| LOC348926  | 0.8735 | 1.1071 | 1.0839 | 0.8339 | 0.9746 | 0.0704 |
| LOC644436  | 0.9532 | 0.9663 | 1.0180 | 0.9609 | 0.9746 | 0.0147 |
| CXorf45    | 0.9281 | 1.2105 | 0.9037 | 0.8561 | 0.9746 | 0.0800 |
| LOC643693  | 0.9789 | 1.1338 | 0.9101 | 0.8757 | 0.9746 | 0.0572 |
| LOC643903  | 0.9009 | 1.0790 | 1.0163 | 0.9023 | 0.9746 | 0.0441 |
| KCNH4      | 0.9822 | 1.0839 | 0.9079 | 0.9246 | 0.9746 | 0.0397 |
| OR10C1     | 0.8412 | 1.0170 | 1.1069 | 0.9333 | 0.9746 | 0.0569 |
| LOC652673  | 0.8546 | 1.1404 | 1.0180 | 0.8855 | 0.9746 | 0.0656 |
| LOC642354  | 0.9430 | 1.1320 | 0.9760 | 0.8475 | 0.9746 | 0.0591 |
| C7orf65    | 0.9456 | 1.1295 | 0.9531 | 0.8703 | 0.9746 | 0.0549 |
| HCG18      | 0.9775 | 1.1049 | 0.9885 | 0.8276 | 0.9746 | 0.0568 |
| SEC15L2    | 0.9363 | 1.0867 | 0.9851 | 0.8904 | 0.9746 | 0.0421 |
| FAM90A13   | 0.9310 | 1.0828 | 0.9849 | 0.8998 | 0.9746 | 0.0401 |
| TTY7       | 0.8935 | 1.0509 | 1.0653 | 0.8889 | 0.9746 | 0.0483 |
| LOC643911  | 0.8626 | 1.0539 | 1.3292 | 0.6529 | 0.9746 | 0.1438 |
| LOC729069  | 0.8930 | 1.0240 | 1.0215 | 0.9600 | 0.9746 | 0.0310 |
| LOC729349  | 0.8658 | 1.1063 | 1.1214 | 0.8051 | 0.9746 | 0.0814 |
| LOC1001299 | 0.9345 | 1.0126 | 1.0428 | 0.9087 | 0.9746 | 0.0317 |
| LOC652342  | 0.9501 | 1.0876 | 0.9418 | 0.9191 | 0.9747 | 0.0382 |
| LOC402716  | 0.9194 | 1.0471 | 1.0786 | 0.8536 | 0.9747 | 0.0530 |
| LOC652578  | 0.9623 | 1.0024 | 1.0111 | 0.9230 | 0.9747 | 0.0203 |
| LOC389328  | 1.0100 | 1.0087 | 0.9724 | 0.9077 | 0.9747 | 0.0240 |
| NCRNA00162 | 0.9493 | 1.1870 | 0.8856 | 0.8769 | 0.9747 | 0.0726 |
| LOC284288  | 0.8456 | 1.0172 | 1.0995 | 0.9364 | 0.9747 | 0.0544 |
| FMNL2      | 0.9652 | 1.0687 | 1.0080 | 0.8569 | 0.9747 | 0.0446 |
| P2RX2      | 0.9207 | 1.0736 | 1.0250 | 0.8795 | 0.9747 | 0.0450 |
| NIT1       | 0.8093 | 0.9915 | 1.1379 | 0.9601 | 0.9747 | 0.0674 |
| MIR1208    | 0.9263 | 1.0746 | 1.0497 | 0.8481 | 0.9747 | 0.0532 |
| LOC728379  | 0.8996 | 1.0830 | 0.9854 | 0.9307 | 0.9747 | 0.0402 |
| LOC642367  | 0.8937 | 1.2031 | 0.9664 | 0.8355 | 0.9747 | 0.0807 |
| LOC653684  | 0.9327 | 0.9693 | 1.0207 | 0.9761 | 0.9747 | 0.0180 |
| LOC646209  | 0.9109 | 1.0414 | 1.0557 | 0.8909 | 0.9747 | 0.0429 |
| LOC388907  | 0.9243 | 1.0476 | 1.0477 | 0.8792 | 0.9747 | 0.0431 |



|            |        |        |        |        |        |        |
|------------|--------|--------|--------|--------|--------|--------|
| AURKC      | 0.9135 | 1.0638 | 1.0296 | 0.8920 | 0.9747 | 0.0424 |
| LOC650227  | 0.9049 | 1.1139 | 0.9233 | 0.9566 | 0.9747 | 0.0476 |
| LOC441896  | 0.8910 | 1.0688 | 1.0640 | 0.8751 | 0.9747 | 0.0530 |
| LOC647558  | 0.9604 | 1.0168 | 1.0456 | 0.8761 | 0.9747 | 0.0374 |
| LOC651051  | 0.9276 | 0.9463 | 1.0847 | 0.9403 | 0.9747 | 0.0369 |
| HOXB8      | 0.9930 | 0.9636 | 1.0068 | 0.9355 | 0.9747 | 0.0159 |
| BSPH1      | 0.9254 | 1.1515 | 0.9687 | 0.8534 | 0.9747 | 0.0635 |
| TMPRSS7    | 0.9518 | 1.0668 | 1.0385 | 0.8419 | 0.9747 | 0.0506 |
| LOC728481  | 0.8436 | 1.0595 | 1.3909 | 0.6050 | 0.9747 | 0.1669 |
| LOC647911  | 1.0130 | 1.0466 | 0.9321 | 0.9072 | 0.9747 | 0.0329 |
| EDA        | 0.8877 | 1.0731 | 1.0152 | 0.9231 | 0.9747 | 0.0424 |
| CCDC54     | 0.9919 | 1.0158 | 0.9705 | 0.9208 | 0.9748 | 0.0202 |
| MIR1236    | 0.9191 | 1.0421 | 1.0120 | 0.9258 | 0.9748 | 0.0308 |
| MGC39372   | 0.9690 | 1.0572 | 0.9487 | 0.9242 | 0.9748 | 0.0289 |
| LOC1001285 | 0.9524 | 1.0185 | 1.0174 | 0.9108 | 0.9748 | 0.0263 |
| WBP2NL     | 0.9498 | 1.0449 | 1.0014 | 0.9029 | 0.9748 | 0.0308 |
| ABCA12     | 0.9752 | 1.0248 | 0.9869 | 0.9121 | 0.9748 | 0.0234 |
| LOC1001291 | 0.8763 | 0.9784 | 1.0314 | 1.0130 | 0.9748 | 0.0346 |
| OR10J5     | 0.9365 | 1.1558 | 0.9598 | 0.8470 | 0.9748 | 0.0651 |
| MIR583     | 0.8974 | 1.1449 | 0.9338 | 0.9230 | 0.9748 | 0.0572 |
| C21orf121  | 0.9383 | 0.9625 | 1.0090 | 0.9893 | 0.9748 | 0.0154 |
| HEPACAM2   | 0.9013 | 1.1282 | 0.9611 | 0.9085 | 0.9748 | 0.0528 |
| LOC645690  | 0.9166 | 1.0061 | 1.0908 | 0.8856 | 0.9748 | 0.0464 |
| LOC651362  | 0.8326 | 1.1547 | 1.0358 | 0.8761 | 0.9748 | 0.0742 |
| LOC729312  | 0.8712 | 1.1675 | 0.9450 | 0.9154 | 0.9748 | 0.0660 |
| LRP2       | 0.9014 | 0.9973 | 1.0377 | 0.9628 | 0.9748 | 0.0289 |
| LOC1001305 | 0.9903 | 0.9903 | 1.0143 | 0.9043 | 0.9748 | 0.0242 |
| NEB        | 0.9364 | 1.0557 | 1.0283 | 0.8789 | 0.9748 | 0.0409 |
| LOC728592  | 0.8931 | 1.1317 | 0.9298 | 0.9447 | 0.9748 | 0.0534 |
| LOC648790  | 0.9410 | 1.0935 | 1.0207 | 0.8440 | 0.9748 | 0.0536 |
| TBC1D3G    | 0.8915 | 1.2168 | 0.9013 | 0.8897 | 0.9748 | 0.0807 |
| SLC35E3    | 0.8208 | 1.2679 | 1.0882 | 0.7223 | 0.9748 | 0.1246 |
| LOC649442  | 0.9376 | 0.9348 | 1.0034 | 1.0235 | 0.9748 | 0.0227 |
| DCST2      | 1.0183 | 1.0278 | 0.9346 | 0.9186 | 0.9748 | 0.0281 |
| LOC388344  | 0.8893 | 1.0633 | 1.0603 | 0.8864 | 0.9748 | 0.0502 |
| LOC1001323 | 0.9444 | 1.1031 | 0.9795 | 0.8722 | 0.9748 | 0.0483 |
| NTS        | 1.0012 | 1.0538 | 1.0256 | 0.8187 | 0.9748 | 0.0531 |
| HDAC9      | 0.9419 | 1.0401 | 0.9980 | 0.9193 | 0.9748 | 0.0273 |
| LOC1001344 | 0.8563 | 1.0614 | 0.9908 | 0.9908 | 0.9748 | 0.0429 |
| LOC647571  | 0.9490 | 1.0616 | 0.9876 | 0.9011 | 0.9748 | 0.0339 |
| ANKRD6     | 0.9187 | 1.1234 | 0.9697 | 0.8875 | 0.9748 | 0.0523 |
| KCNAB2     | 0.8647 | 1.1700 | 0.9661 | 0.8984 | 0.9748 | 0.0684 |
| HEXA       | 0.9564 | 1.0748 | 0.9797 | 0.8885 | 0.9748 | 0.0385 |
| MSLNL      | 0.9544 | 1.0293 | 1.0697 | 0.8460 | 0.9748 | 0.0491 |
| LSR        | 0.9209 | 1.1655 | 0.9918 | 0.8212 | 0.9748 | 0.0726 |
| RP13-360B2 | 0.9729 | 0.9512 | 1.0109 | 0.9644 | 0.9748 | 0.0128 |

|            |        |        |        |        |        |        |
|------------|--------|--------|--------|--------|--------|--------|
| LOC1001324 | 0.9156 | 1.1918 | 0.9502 | 0.8418 | 0.9749 | 0.0758 |
| NPAS3      | 0.9421 | 1.0323 | 1.0527 | 0.8723 | 0.9749 | 0.0418 |
| LOC1001297 | 0.9308 | 1.0941 | 1.0205 | 0.8539 | 0.9749 | 0.0523 |
| PLEKHG6    | 0.9637 | 1.0341 | 1.0432 | 0.8585 | 0.9749 | 0.0427 |
| LOC729159  | 0.9135 | 1.0563 | 1.0212 | 0.9084 | 0.9749 | 0.0376 |
| ROPN1      | 0.8904 | 1.1002 | 0.9887 | 0.9202 | 0.9749 | 0.0466 |
| GP5        | 0.9238 | 1.0102 | 1.0297 | 0.9357 | 0.9749 | 0.0264 |
| LOC1001333 | 0.9308 | 0.9835 | 1.0819 | 0.9033 | 0.9749 | 0.0394 |
| USP51      | 0.9945 | 1.0307 | 1.0112 | 0.8630 | 0.9749 | 0.0380 |
| LOC440402  | 0.9069 | 1.1054 | 0.9273 | 0.9600 | 0.9749 | 0.0448 |
| ZNF426     | 0.8451 | 1.2597 | 1.0368 | 0.7580 | 0.9749 | 0.1114 |
| MYL9       | 0.9653 | 1.0338 | 1.0131 | 0.8873 | 0.9749 | 0.0325 |
| LOC649414  | 0.8896 | 1.0559 | 1.0459 | 0.9082 | 0.9749 | 0.0441 |
| PNLDC1     | 0.9083 | 1.0065 | 1.0473 | 0.9374 | 0.9749 | 0.0317 |
| RNF219     | 0.8312 | 1.3529 | 0.8730 | 0.8424 | 0.9749 | 0.1263 |
| LOC648710  | 0.9029 | 1.0483 | 1.0496 | 0.8987 | 0.9749 | 0.0428 |
| LOC401980  | 0.9038 | 1.1075 | 1.0127 | 0.8756 | 0.9749 | 0.0532 |
| SLC25A17   | 0.8443 | 1.3159 | 1.0730 | 0.6663 | 0.9749 | 0.1409 |
| LOC1001302 | 0.9283 | 0.9594 | 1.0854 | 0.9265 | 0.9749 | 0.0376 |
| C17orf37   | 1.0241 | 0.9388 | 1.1051 | 0.8316 | 0.9749 | 0.0586 |
| LOC339843  | 0.9787 | 1.0786 | 1.0576 | 0.7848 | 0.9749 | 0.0669 |
| DULLARD    | 0.9365 | 1.4482 | 0.7902 | 0.7249 | 0.9749 | 0.1638 |
| CD180      | 0.9172 | 1.1276 | 1.0261 | 0.8289 | 0.9749 | 0.0649 |
| LOC728148  | 0.9273 | 0.9727 | 1.1255 | 0.8742 | 0.9749 | 0.0541 |
| GATAD2B    | 0.8957 | 1.1129 | 1.0671 | 0.8241 | 0.9749 | 0.0686 |
| LOC653486  | 0.9452 | 1.0750 | 1.0895 | 0.7902 | 0.9749 | 0.0696 |
| KIF12      | 0.8587 | 1.0824 | 1.0548 | 0.9038 | 0.9749 | 0.0551 |
| MIR146A    | 0.9405 | 0.9387 | 1.0165 | 1.0042 | 0.9750 | 0.0206 |
| LOC1001310 | 0.8886 | 1.0097 | 1.0517 | 0.9498 | 0.9750 | 0.0356 |
| KCNIP1     | 0.9528 | 1.0301 | 0.9701 | 0.9469 | 0.9750 | 0.0190 |
| GPR18      | 0.9495 | 0.9786 | 1.0922 | 0.8795 | 0.9750 | 0.0443 |
| LOC649493  | 1.0038 | 1.1181 | 0.9006 | 0.8774 | 0.9750 | 0.0551 |
| NT5DC4     | 0.9188 | 1.0537 | 1.0435 | 0.8838 | 0.9750 | 0.0432 |
| FLJ45202   | 1.0154 | 1.1701 | 0.8974 | 0.8170 | 0.9750 | 0.0767 |
| LOC255130  | 0.9860 | 1.0936 | 0.9351 | 0.8852 | 0.9750 | 0.0446 |
| NOTCH3     | 0.8647 | 1.3835 | 0.8584 | 0.7934 | 0.9750 | 0.1371 |
| LOC1001328 | 1.0207 | 0.9358 | 1.0462 | 0.8973 | 0.9750 | 0.0350 |
| IGFL2      | 0.8935 | 1.0494 | 1.0916 | 0.8653 | 0.9750 | 0.0561 |
| LOC1001280 | 0.9374 | 1.0477 | 1.0110 | 0.9039 | 0.9750 | 0.0330 |
| HCFC2      | 1.0304 | 1.0535 | 1.0704 | 0.7457 | 0.9750 | 0.0769 |
| LOC653520  | 0.9273 | 1.0602 | 0.9917 | 0.9208 | 0.9750 | 0.0326 |
| CCDC22     | 0.9831 | 1.1994 | 0.9421 | 0.7753 | 0.9750 | 0.0873 |
| IKZF2      | 0.9377 | 1.1031 | 0.9445 | 0.9147 | 0.9750 | 0.0432 |
| LOC1001323 | 0.9143 | 1.0741 | 1.0342 | 0.8775 | 0.9750 | 0.0470 |
| LOC1001325 | 0.8818 | 1.1081 | 1.0206 | 0.8895 | 0.9750 | 0.0546 |
| MAFA       | 0.9469 | 0.9220 | 1.1094 | 0.9218 | 0.9750 | 0.0452 |

|            |        |        |        |        |        |        |
|------------|--------|--------|--------|--------|--------|--------|
| TPSG1      | 0.8901 | 1.0324 | 1.0502 | 0.9273 | 0.9750 | 0.0392 |
| NTN1       | 0.9180 | 1.1075 | 0.9687 | 0.9059 | 0.9750 | 0.0462 |
| FAM7A3     | 0.8730 | 1.0962 | 1.0074 | 0.9235 | 0.9750 | 0.0490 |
| YIPF1      | 0.9447 | 1.3172 | 0.9192 | 0.7190 | 0.9750 | 0.1247 |
| HERC2P4    | 0.8512 | 1.1047 | 1.0253 | 0.9189 | 0.9750 | 0.0561 |
| LOC727909  | 0.9054 | 1.1119 | 0.9605 | 0.9223 | 0.9750 | 0.0471 |
| GPR109B    | 0.9508 | 1.0568 | 1.0015 | 0.8911 | 0.9750 | 0.0354 |
| LOC440836  | 0.9255 | 1.0935 | 0.9983 | 0.8829 | 0.9750 | 0.0461 |
| C11orf87   | 0.8615 | 1.1115 | 0.8669 | 1.0603 | 0.9750 | 0.0648 |
| LOC649341  | 0.8570 | 1.1399 | 0.9451 | 0.9582 | 0.9751 | 0.0594 |
| DNTTIP2    | 1.0047 | 1.0559 | 0.9489 | 0.8907 | 0.9751 | 0.0356 |
| PSD        | 0.7686 | 1.1608 | 1.0811 | 0.8897 | 0.9751 | 0.0893 |
| SLC25A34   | 0.7976 | 1.2130 | 1.0704 | 0.8192 | 0.9751 | 0.1006 |
| TCEB1P3    | 0.8969 | 1.1721 | 0.9550 | 0.8762 | 0.9751 | 0.0678 |
| LOC646093  | 0.8479 | 1.1448 | 1.0456 | 0.8619 | 0.9751 | 0.0723 |
| LOC1001335 | 0.8818 | 1.0078 | 1.0253 | 0.9854 | 0.9751 | 0.0321 |
| LOC1001307 | 0.8902 | 1.0543 | 1.0655 | 0.8902 | 0.9751 | 0.0490 |
| TP63       | 0.9536 | 1.0616 | 0.9924 | 0.8927 | 0.9751 | 0.0354 |
| EDN2       | 1.0109 | 1.1368 | 0.9571 | 0.7954 | 0.9751 | 0.0707 |
| LOC727958  | 0.9206 | 1.0809 | 1.0339 | 0.8649 | 0.9751 | 0.0498 |
| LOC652327  | 0.8602 | 1.1691 | 1.0295 | 0.8415 | 0.9751 | 0.0773 |
| TWIST2     | 0.9268 | 1.0652 | 0.9838 | 0.9245 | 0.9751 | 0.0330 |
| SST        | 0.9759 | 1.0921 | 1.0550 | 0.7775 | 0.9751 | 0.0702 |
| ZNF238     | 0.9271 | 1.0237 | 1.0673 | 0.8824 | 0.9751 | 0.0426 |
| LOC643428  | 0.9802 | 1.0382 | 0.9375 | 0.9446 | 0.9751 | 0.0230 |
| REN        | 1.0140 | 0.9308 | 0.9677 | 0.9879 | 0.9751 | 0.0176 |
| CTGLF7     | 0.8815 | 1.1688 | 1.0963 | 0.7538 | 0.9751 | 0.0957 |
| LOC401068  | 0.8487 | 1.0545 | 1.0079 | 0.9894 | 0.9751 | 0.0443 |
| APBB1      | 0.9199 | 1.0014 | 1.0247 | 0.9545 | 0.9751 | 0.0235 |
| LOC283028  | 0.9841 | 1.0182 | 1.0011 | 0.8970 | 0.9751 | 0.0269 |
| CILP2      | 0.8652 | 1.1681 | 1.0110 | 0.8562 | 0.9751 | 0.0735 |
| LOC646575  | 0.9228 | 0.9481 | 0.9910 | 1.0386 | 0.9751 | 0.0254 |
| AGMAT      | 0.9468 | 1.0241 | 0.9899 | 0.9397 | 0.9751 | 0.0197 |
| C6orf222   | 1.0343 | 0.9710 | 1.0417 | 0.8535 | 0.9751 | 0.0435 |
| C2         | 0.8635 | 1.0218 | 1.0198 | 0.9954 | 0.9751 | 0.0377 |
| FXVD1      | 0.9151 | 1.2065 | 0.9819 | 0.7970 | 0.9751 | 0.0861 |
| LOC652725  | 1.0416 | 1.0390 | 0.9212 | 0.8988 | 0.9751 | 0.0379 |
| LOC645227  | 0.9132 | 1.0323 | 1.0110 | 0.9441 | 0.9751 | 0.0279 |
| LOC651714  | 0.9446 | 1.0217 | 1.0191 | 0.9152 | 0.9752 | 0.0268 |
| CNR2       | 0.9226 | 1.0799 | 0.9708 | 0.9273 | 0.9752 | 0.0366 |
| C10orf88   | 0.8530 | 1.3455 | 0.9635 | 0.7386 | 0.9752 | 0.1317 |
| PML        | 0.9212 | 1.0758 | 1.0074 | 0.8963 | 0.9752 | 0.0411 |
| GORASP1    | 1.1473 | 1.2611 | 0.8697 | 0.6225 | 0.9752 | 0.1434 |
| NOL10      | 0.9497 | 1.1555 | 0.9664 | 0.8291 | 0.9752 | 0.0674 |
| CSRP3      | 0.9554 | 1.0057 | 1.0650 | 0.8745 | 0.9752 | 0.0404 |
| EFNA3      | 0.9786 | 1.1274 | 0.9326 | 0.8619 | 0.9752 | 0.0561 |

|            |        |        |        |        |        |        |
|------------|--------|--------|--------|--------|--------|--------|
| LOC730926  | 0.9093 | 1.0455 | 1.0581 | 0.8876 | 0.9752 | 0.0446 |
| ACOXL      | 0.8342 | 1.1330 | 1.0244 | 0.9090 | 0.9752 | 0.0656 |
| FCAMR      | 0.8995 | 1.0969 | 0.9951 | 0.9092 | 0.9752 | 0.0459 |
| PLA2G4C    | 0.9327 | 1.0011 | 1.0305 | 0.9364 | 0.9752 | 0.0242 |
| LOC1001289 | 0.8645 | 1.1031 | 1.0362 | 0.8969 | 0.9752 | 0.0566 |
| LOC651073  | 0.8978 | 1.1221 | 1.0139 | 0.8669 | 0.9752 | 0.0583 |
| LOC1001326 | 0.8638 | 1.2122 | 0.8485 | 0.9762 | 0.9752 | 0.0840 |
| ZXDA       | 0.9319 | 1.0474 | 1.0073 | 0.9141 | 0.9752 | 0.0314 |
| LOC1001320 | 1.0222 | 0.9591 | 1.0582 | 0.8612 | 0.9752 | 0.0432 |
| LOC642960  | 0.9728 | 1.1277 | 0.9158 | 0.8844 | 0.9752 | 0.0540 |
| LOC1001304 | 0.8479 | 1.2156 | 1.1037 | 0.7335 | 0.9752 | 0.1114 |
| TSPAN2     | 0.9442 | 0.9948 | 1.0813 | 0.8805 | 0.9752 | 0.0424 |
| OR1D5      | 0.9275 | 1.0704 | 1.0411 | 0.8619 | 0.9752 | 0.0487 |
| LOC642373  | 0.9548 | 1.0317 | 0.9900 | 0.9244 | 0.9752 | 0.0231 |
| CACNG4     | 1.0122 | 1.2792 | 0.8448 | 0.7646 | 0.9752 | 0.1137 |
| EPB41L4B   | 0.9099 | 1.0857 | 0.9583 | 0.9470 | 0.9752 | 0.0382 |
| LOC284100  | 0.9389 | 1.0069 | 1.0256 | 0.9294 | 0.9752 | 0.0241 |
| LOC729390  | 0.9288 | 1.0399 | 0.9941 | 0.9380 | 0.9752 | 0.0259 |
| MIR380     | 0.9432 | 1.0125 | 1.0452 | 0.9000 | 0.9752 | 0.0329 |
| FLJ32867   | 0.9668 | 1.0935 | 0.9050 | 0.9356 | 0.9752 | 0.0414 |
| ALOX12P2   | 0.9202 | 1.1234 | 0.9788 | 0.8784 | 0.9752 | 0.0535 |
| LOC643102  | 1.0098 | 1.0162 | 1.0347 | 0.8402 | 0.9752 | 0.0453 |
| LOC400456  | 0.8856 | 1.0645 | 1.0226 | 0.9282 | 0.9752 | 0.0413 |
| MED30      | 0.9384 | 1.2247 | 0.9101 | 0.8277 | 0.9752 | 0.0864 |
| FLJ46321   | 0.9475 | 1.0717 | 0.9910 | 0.8907 | 0.9752 | 0.0381 |
| SLC24A5    | 0.9388 | 0.9818 | 1.0309 | 0.9494 | 0.9752 | 0.0207 |
| HCCA2      | 0.8871 | 1.2461 | 0.9416 | 0.8261 | 0.9752 | 0.0933 |
| LOC389904  | 1.0016 | 1.0562 | 1.0232 | 0.8199 | 0.9752 | 0.0530 |
| LOC728129  | 0.9123 | 1.1499 | 1.0027 | 0.8360 | 0.9752 | 0.0674 |
| NLRC4      | 0.9324 | 1.1498 | 0.9966 | 0.8223 | 0.9753 | 0.0684 |
| TEX11      | 0.9477 | 1.0664 | 0.9787 | 0.9084 | 0.9753 | 0.0336 |
| OPRS1      | 0.9129 | 1.0305 | 1.0570 | 0.9007 | 0.9753 | 0.0400 |
| MIRLET7A1  | 0.8879 | 1.0327 | 0.9866 | 0.9938 | 0.9753 | 0.0308 |
| LOC643107  | 0.8802 | 1.0854 | 0.9784 | 0.9571 | 0.9753 | 0.0423 |
| LOC1001344 | 0.9609 | 1.0327 | 1.0828 | 0.8247 | 0.9753 | 0.0561 |
| LOC1001289 | 0.9360 | 1.0465 | 1.0027 | 0.9159 | 0.9753 | 0.0301 |
| LOC653759  | 0.9182 | 1.1040 | 1.0123 | 0.8667 | 0.9753 | 0.0524 |
| SLC4A10    | 1.0426 | 1.0265 | 0.9358 | 0.8962 | 0.9753 | 0.0353 |
| LOC1001285 | 0.9595 | 1.0384 | 1.0115 | 0.8917 | 0.9753 | 0.0323 |
| CFHR4      | 0.8996 | 1.0607 | 1.0057 | 0.9352 | 0.9753 | 0.0360 |
| ZDHHC11B   | 0.9622 | 1.0601 | 0.8737 | 1.0051 | 0.9753 | 0.0393 |
| LOC1001291 | 1.0512 | 1.0715 | 0.9014 | 0.8770 | 0.9753 | 0.0501 |
| LOC648415  | 0.8770 | 1.1766 | 0.9611 | 0.8865 | 0.9753 | 0.0697 |
| LOC651286  | 0.9980 | 1.1040 | 0.9314 | 0.8678 | 0.9753 | 0.0505 |
| PIP5K2A    | 0.9074 | 1.0851 | 1.0964 | 0.8124 | 0.9753 | 0.0694 |
| GOLGA6A    | 0.9562 | 1.1010 | 0.9410 | 0.9031 | 0.9753 | 0.0433 |

|            |        |        |        |        |        |        |
|------------|--------|--------|--------|--------|--------|--------|
| LOC649184  | 0.9170 | 1.0736 | 0.9996 | 0.9112 | 0.9753 | 0.0385 |
| OPRD1      | 0.8605 | 1.0899 | 1.0295 | 0.9215 | 0.9753 | 0.0518 |
| FYN        | 0.8828 | 1.0993 | 1.0037 | 0.9156 | 0.9753 | 0.0486 |
| LOC642693  | 1.0837 | 0.9497 | 1.0645 | 0.8036 | 0.9753 | 0.0644 |
| LOC644348  | 0.9536 | 0.9250 | 1.1219 | 0.9010 | 0.9754 | 0.0500 |
| GPBP1      | 0.8516 | 1.3327 | 0.9621 | 0.7550 | 0.9754 | 0.1264 |
| UBA52      | 0.9265 | 1.0804 | 0.9890 | 0.9055 | 0.9754 | 0.0392 |
| TPSD1      | 0.9978 | 1.0320 | 0.9946 | 0.8770 | 0.9754 | 0.0339 |
| SOSTDC1    | 0.8926 | 1.0672 | 1.0064 | 0.9353 | 0.9754 | 0.0386 |
| OR1D2      | 0.9270 | 1.1293 | 0.9486 | 0.8966 | 0.9754 | 0.0524 |
| COX19      | 0.9874 | 1.2001 | 0.9482 | 0.7659 | 0.9754 | 0.0891 |
| LOC652624  | 0.6218 | 1.2036 | 1.4452 | 0.6308 | 0.9754 | 0.2075 |
| CCL8       | 0.9876 | 1.0799 | 0.9416 | 0.8924 | 0.9754 | 0.0399 |
| LOC649540  | 0.9968 | 1.2343 | 0.9094 | 0.7610 | 0.9754 | 0.0991 |
| LOC1001304 | 0.9323 | 1.1546 | 0.8945 | 0.9201 | 0.9754 | 0.0602 |
| TAS2R19    | 0.8857 | 1.0291 | 1.1170 | 0.8697 | 0.9754 | 0.0593 |
| NCRNA00112 | 0.9130 | 1.1151 | 1.0551 | 0.8183 | 0.9754 | 0.0674 |
| LOC647716  | 0.9227 | 1.0449 | 1.0414 | 0.8925 | 0.9754 | 0.0396 |
| PEX12      | 0.9670 | 1.0455 | 1.0191 | 0.8699 | 0.9754 | 0.0388 |
| LOC729810  | 1.0549 | 1.0183 | 1.0911 | 0.7373 | 0.9754 | 0.0808 |
| TMC5       | 0.9471 | 1.0089 | 1.0201 | 0.9255 | 0.9754 | 0.0231 |
| LOC1001317 | 0.9408 | 1.0671 | 1.0073 | 0.8864 | 0.9754 | 0.0393 |
| GON4L      | 0.9655 | 1.0214 | 1.0530 | 0.8616 | 0.9754 | 0.0420 |
| CCDC144B   | 0.8508 | 1.1321 | 0.9867 | 0.9321 | 0.9754 | 0.0592 |
| CA14       | 0.8615 | 1.1105 | 1.0509 | 0.8789 | 0.9754 | 0.0621 |
| LOC284912  | 0.8399 | 1.0847 | 1.0398 | 0.9373 | 0.9754 | 0.0547 |
| ANK2       | 0.9146 | 1.0955 | 0.9764 | 0.9152 | 0.9754 | 0.0426 |
| CASP14     | 1.0273 | 0.9461 | 1.0422 | 0.8860 | 0.9754 | 0.0365 |
| EPHA8      | 0.9575 | 1.0806 | 0.9962 | 0.8674 | 0.9754 | 0.0442 |
| DCDC1      | 0.8358 | 1.1031 | 1.0928 | 0.8700 | 0.9754 | 0.0711 |
| CNBP       | 0.6927 | 1.4502 | 0.9669 | 0.7919 | 0.9754 | 0.1681 |
| LOC642443  | 0.8340 | 1.2215 | 1.0454 | 0.8008 | 0.9754 | 0.0983 |
| LOC644086  | 0.9190 | 1.0222 | 1.0138 | 0.9468 | 0.9754 | 0.0253 |
| HDGFL1     | 0.9111 | 1.0053 | 1.1085 | 0.8768 | 0.9754 | 0.0520 |
| FAM178B    | 1.0069 | 1.0979 | 0.9116 | 0.8855 | 0.9754 | 0.0484 |
| CACNG6     | 0.9645 | 1.1200 | 0.9554 | 0.8619 | 0.9754 | 0.0535 |
| LOC645006  | 0.9231 | 1.0807 | 1.0371 | 0.8608 | 0.9754 | 0.0506 |
| N6AMT2     | 0.8440 | 1.1820 | 1.0582 | 0.8177 | 0.9754 | 0.0874 |
| C21orf42   | 0.9937 | 1.0953 | 0.9926 | 0.8202 | 0.9754 | 0.0571 |
| LOC284685  | 0.9727 | 1.0362 | 0.9893 | 0.9037 | 0.9754 | 0.0274 |
| LOC651287  | 0.8829 | 1.0556 | 1.0212 | 0.9421 | 0.9755 | 0.0389 |
| SSTR5      | 1.0124 | 0.9391 | 0.9988 | 0.9515 | 0.9755 | 0.0178 |
| PMFBP1     | 0.9389 | 1.0546 | 1.0739 | 0.8344 | 0.9755 | 0.0557 |
| SLC2A13    | 0.9750 | 0.9898 | 1.0058 | 0.9312 | 0.9755 | 0.0160 |
| MIR496     | 0.9367 | 1.0081 | 1.0240 | 0.9331 | 0.9755 | 0.0236 |
| MIRLET7A2  | 0.9493 | 0.9989 | 1.0288 | 0.9249 | 0.9755 | 0.0235 |

|            |        |        |        |        |        |        |
|------------|--------|--------|--------|--------|--------|--------|
| LRP3       | 0.9414 | 1.3393 | 0.8464 | 0.7747 | 0.9755 | 0.1260 |
| CALML5     | 0.9261 | 1.0907 | 1.0333 | 0.8516 | 0.9755 | 0.0535 |
| SNORD91B   | 0.9134 | 1.0658 | 0.9978 | 0.9248 | 0.9755 | 0.0354 |
| LPPR5      | 0.9437 | 1.0154 | 1.0292 | 0.9136 | 0.9755 | 0.0279 |
| FKBP1P1    | 0.8364 | 1.2136 | 0.9657 | 0.8862 | 0.9755 | 0.0837 |
| LOC650657  | 0.8223 | 1.0611 | 1.0150 | 1.0035 | 0.9755 | 0.0526 |
| LOC642622  | 1.0157 | 1.0526 | 0.9283 | 0.9052 | 0.9755 | 0.0350 |
| LOC644779  | 0.9122 | 1.0846 | 0.9753 | 0.9297 | 0.9755 | 0.0387 |
| CRYBB3     | 0.9123 | 0.8865 | 1.1013 | 1.0018 | 0.9755 | 0.0487 |
| C1QTNF7    | 1.0289 | 0.9735 | 0.9893 | 0.9103 | 0.9755 | 0.0247 |
| EXOD1      | 1.0209 | 1.0260 | 0.9620 | 0.8931 | 0.9755 | 0.0311 |
| TMCO6      | 0.9636 | 1.0944 | 0.9938 | 0.8501 | 0.9755 | 0.0503 |
| SNX20      | 0.9407 | 1.0657 | 0.9802 | 0.9155 | 0.9755 | 0.0329 |
| CCNYL3     | 0.9552 | 1.0692 | 1.0072 | 0.8704 | 0.9755 | 0.0421 |
| LOC253039  | 0.8978 | 1.1788 | 0.9627 | 0.8627 | 0.9755 | 0.0709 |
| FLJ43870   | 0.9644 | 1.0341 | 1.0171 | 0.8865 | 0.9755 | 0.0332 |
| C8B        | 0.9469 | 1.0821 | 0.9051 | 0.9678 | 0.9755 | 0.0379 |
| AASDH      | 0.8784 | 1.1235 | 1.0506 | 0.8496 | 0.9755 | 0.0663 |
| ICA1L      | 0.9233 | 1.1077 | 0.9847 | 0.8863 | 0.9755 | 0.0485 |
| FLJ36157   | 0.9767 | 1.1022 | 0.9437 | 0.8794 | 0.9755 | 0.0468 |
| SATL1      | 0.9869 | 1.1403 | 0.9685 | 0.8064 | 0.9755 | 0.0683 |
| FGF12      | 0.9378 | 1.0594 | 0.9623 | 0.9426 | 0.9755 | 0.0285 |
| LOC727935  | 0.9079 | 1.0727 | 0.9679 | 0.9535 | 0.9755 | 0.0348 |
| APBA3      | 1.0125 | 1.2330 | 0.8609 | 0.7957 | 0.9755 | 0.0971 |
| LCE1D      | 0.9374 | 1.0265 | 1.0684 | 0.8698 | 0.9755 | 0.0446 |
| MIR1264    | 0.8703 | 1.0503 | 1.0760 | 0.9054 | 0.9755 | 0.0514 |
| LOC652043  | 0.9825 | 0.9011 | 1.0865 | 0.9319 | 0.9755 | 0.0406 |
| GNB3       | 0.8987 | 1.0458 | 1.0936 | 0.8641 | 0.9755 | 0.0557 |
| DSPP       | 0.8522 | 1.0848 | 1.0065 | 0.9586 | 0.9755 | 0.0486 |
| LOC641518  | 0.9664 | 1.0408 | 0.9394 | 0.9555 | 0.9755 | 0.0225 |
| DPEP3      | 0.9666 | 1.0838 | 0.9506 | 0.9012 | 0.9755 | 0.0387 |
| SERPINB9   | 0.8303 | 1.0978 | 1.0262 | 0.9479 | 0.9755 | 0.0573 |
| DKFZP434B0 | 0.9713 | 1.0820 | 0.9926 | 0.8565 | 0.9756 | 0.0464 |
| SYNC       | 0.9433 | 0.9815 | 1.0953 | 0.8822 | 0.9756 | 0.0449 |
| EIF5AL1    | 0.8604 | 1.1000 | 1.0530 | 0.8889 | 0.9756 | 0.0593 |
| C21orf125  | 0.9951 | 1.0669 | 0.9549 | 0.8855 | 0.9756 | 0.0379 |
| TNNT3      | 0.9743 | 1.0725 | 0.9172 | 0.9384 | 0.9756 | 0.0344 |
| FUT7       | 1.0383 | 1.1057 | 0.9241 | 0.8343 | 0.9756 | 0.0602 |
| LOC643313  | 0.9345 | 1.0166 | 1.0180 | 0.9333 | 0.9756 | 0.0241 |
| LOC642684  | 0.8976 | 1.0955 | 1.0301 | 0.8792 | 0.9756 | 0.0522 |
| CACNA1G    | 0.9379 | 1.0487 | 1.0220 | 0.8938 | 0.9756 | 0.0361 |
| LOC1001306 | 0.9632 | 1.1145 | 0.9436 | 0.8811 | 0.9756 | 0.0495 |
| LOC649094  | 0.9281 | 1.0641 | 0.9661 | 0.9441 | 0.9756 | 0.0305 |
| LOC643993  | 0.9334 | 1.0596 | 1.0630 | 0.8464 | 0.9756 | 0.0526 |
| LOC646971  | 0.9763 | 1.0697 | 1.0754 | 0.7810 | 0.9756 | 0.0687 |
| CADPS      | 0.9650 | 1.0598 | 1.0079 | 0.8698 | 0.9756 | 0.0402 |

|            |        |        |        |        |        |        |
|------------|--------|--------|--------|--------|--------|--------|
| LOC1001342 | 0.9512 | 1.1076 | 0.9759 | 0.8678 | 0.9756 | 0.0497 |
| SERP2      | 0.8553 | 1.1197 | 0.9700 | 0.9575 | 0.9756 | 0.0545 |
| LOC649745  | 0.9895 | 1.0636 | 0.9857 | 0.8638 | 0.9756 | 0.0414 |
| OR6W1P     | 0.9706 | 1.0988 | 0.9513 | 0.8819 | 0.9756 | 0.0452 |
| LOC645141  | 1.0641 | 0.9331 | 1.0602 | 0.8452 | 0.9756 | 0.0531 |
| LOC643580  | 0.9064 | 1.0853 | 1.0205 | 0.8904 | 0.9756 | 0.0466 |
| LOC653040  | 0.8999 | 1.0846 | 1.0163 | 0.9018 | 0.9756 | 0.0454 |
| LOC648152  | 0.9839 | 1.0350 | 0.9946 | 0.8891 | 0.9757 | 0.0309 |
| LOC1001348 | 0.7589 | 1.0675 | 1.1329 | 0.9433 | 0.9757 | 0.0823 |
| DCDC2      | 1.0071 | 1.0463 | 0.9558 | 0.8934 | 0.9757 | 0.0331 |
| LOC642671  | 0.9768 | 1.0591 | 0.9442 | 0.9226 | 0.9757 | 0.0300 |
| DNM1P35    | 0.9145 | 1.0133 | 1.0108 | 0.9640 | 0.9757 | 0.0233 |
| SEMA6D     | 0.9485 | 1.0308 | 0.9895 | 0.9338 | 0.9757 | 0.0218 |
| LOC402670  | 0.9741 | 0.9465 | 1.0370 | 0.9450 | 0.9757 | 0.0215 |
| TEX28      | 0.9660 | 0.9889 | 0.9454 | 1.0025 | 0.9757 | 0.0126 |
| LOC1001309 | 0.9848 | 1.0639 | 0.9777 | 0.8763 | 0.9757 | 0.0385 |
| LOC123876  | 0.9037 | 1.0552 | 1.0264 | 0.9175 | 0.9757 | 0.0381 |
| LOC643147  | 0.9018 | 1.0659 | 1.0304 | 0.9046 | 0.9757 | 0.0425 |
| RPS18      | 0.8506 | 1.1005 | 1.1882 | 0.7636 | 0.9757 | 0.1006 |
| ATOX1      | 0.8333 | 1.4222 | 0.9274 | 0.7199 | 0.9757 | 0.1548 |
| NPR1       | 0.8954 | 1.0772 | 1.1048 | 0.8255 | 0.9757 | 0.0683 |
| CYP2C18    | 0.8427 | 1.0946 | 1.0328 | 0.9328 | 0.9757 | 0.0555 |
| LOC1001297 | 0.7533 | 1.1435 | 1.0207 | 0.9854 | 0.9757 | 0.0815 |
| LOC441127  | 0.8814 | 1.0641 | 1.0123 | 0.9452 | 0.9757 | 0.0398 |
| CASP1      | 0.9314 | 1.0656 | 0.9892 | 0.9168 | 0.9757 | 0.0338 |
| LOC646324  | 0.9363 | 0.9576 | 1.1148 | 0.8943 | 0.9757 | 0.0482 |
| ANKRD34B   | 0.9245 | 1.0658 | 0.9752 | 0.9375 | 0.9757 | 0.0319 |
| CPNE3      | 0.7789 | 1.3581 | 1.0242 | 0.7418 | 0.9758 | 0.1420 |
| LEAP2      | 0.9123 | 1.1046 | 0.9840 | 0.9021 | 0.9758 | 0.0467 |
| LOC1001307 | 0.9636 | 1.0081 | 1.0124 | 0.9189 | 0.9758 | 0.0219 |
| BMP2KL     | 0.9591 | 1.0869 | 0.9992 | 0.8578 | 0.9758 | 0.0475 |
| S100A10    | 0.8648 | 1.1634 | 0.9989 | 0.8760 | 0.9758 | 0.0695 |
| C1orf84    | 0.8852 | 1.1228 | 1.0033 | 0.8918 | 0.9758 | 0.0560 |
| LOC401957  | 0.8996 | 1.1062 | 1.0711 | 0.8261 | 0.9758 | 0.0673 |
| LOC646706  | 0.9469 | 1.1340 | 0.9649 | 0.8573 | 0.9758 | 0.0578 |
| POLR1A     | 0.9646 | 1.0976 | 1.0326 | 0.8082 | 0.9758 | 0.0621 |
| LOC1001319 | 0.8922 | 1.0480 | 0.9931 | 0.9699 | 0.9758 | 0.0323 |
| PLK5P      | 0.8583 | 1.0239 | 1.0526 | 0.9683 | 0.9758 | 0.0429 |
| KRTAP5-8   | 0.9270 | 0.9749 | 1.0468 | 0.9544 | 0.9758 | 0.0256 |
| LOC653394  | 0.9570 | 1.0821 | 0.9222 | 0.9418 | 0.9758 | 0.0361 |
| LOC648278  | 0.9561 | 1.1035 | 0.9065 | 0.9371 | 0.9758 | 0.0438 |
| FLJ39739   | 0.8985 | 1.0388 | 1.0484 | 0.9175 | 0.9758 | 0.0394 |
| EPHA5      | 0.9736 | 1.0272 | 1.0089 | 0.8935 | 0.9758 | 0.0296 |
| NF1        | 0.8840 | 1.1087 | 1.0231 | 0.8874 | 0.9758 | 0.0549 |
| LOC1001337 | 0.9281 | 1.0944 | 0.9755 | 0.9051 | 0.9758 | 0.0422 |
| LOC646346  | 0.9281 | 1.0774 | 1.0663 | 0.8314 | 0.9758 | 0.0589 |

|            |        |        |        |        |        |        |
|------------|--------|--------|--------|--------|--------|--------|
| XRCC4      | 0.8721 | 1.0833 | 1.0123 | 0.9354 | 0.9758 | 0.0459 |
| SYT6       | 0.9244 | 0.9935 | 1.0932 | 0.8922 | 0.9758 | 0.0445 |
| CCDC37     | 0.9299 | 1.0823 | 0.9509 | 0.9401 | 0.9758 | 0.0357 |
| LOC649940  | 0.9934 | 0.9543 | 1.0013 | 0.9543 | 0.9758 | 0.0125 |
| LOC442597  | 1.1257 | 0.9302 | 0.9624 | 0.8850 | 0.9758 | 0.0524 |
| LOC1001282 | 0.9153 | 1.0675 | 1.0325 | 0.8879 | 0.9758 | 0.0438 |
| LOC729798  | 0.9270 | 1.1893 | 1.0165 | 0.7706 | 0.9758 | 0.0874 |
| CSHL1      | 0.9449 | 1.1006 | 1.0191 | 0.8387 | 0.9758 | 0.0557 |
| TMEM202    | 0.9207 | 1.0898 | 0.9292 | 0.9636 | 0.9758 | 0.0391 |
| MMP28      | 0.9118 | 1.0706 | 1.0059 | 0.9150 | 0.9758 | 0.0384 |
| LOC1001306 | 0.8923 | 1.1085 | 1.0074 | 0.8952 | 0.9758 | 0.0517 |
| NPPB       | 0.8394 | 1.0226 | 1.1553 | 0.8861 | 0.9758 | 0.0713 |
| LOC1001312 | 0.8792 | 1.1615 | 0.9492 | 0.9134 | 0.9758 | 0.0635 |
| LOC401463  | 0.9614 | 1.0651 | 0.9967 | 0.8802 | 0.9758 | 0.0385 |
| ANXA5      | 0.6354 | 1.5103 | 1.0424 | 0.7152 | 0.9758 | 0.1987 |
| BRWD3      | 0.9022 | 1.0703 | 1.0143 | 0.9166 | 0.9758 | 0.0401 |
| C22orf33   | 0.8907 | 1.1618 | 0.9687 | 0.8822 | 0.9759 | 0.0650 |
| MGC15763   | 0.9215 | 1.2276 | 0.8949 | 0.8594 | 0.9759 | 0.0849 |
| LOC342531  | 0.8945 | 1.0254 | 1.0761 | 0.9074 | 0.9759 | 0.0445 |
| LOC645197  | 0.9078 | 1.0946 | 1.0442 | 0.8568 | 0.9759 | 0.0560 |
| C8orf62    | 0.9709 | 0.9857 | 1.0460 | 0.9008 | 0.9759 | 0.0298 |
| HCN3       | 0.8919 | 0.9941 | 1.1245 | 0.8929 | 0.9759 | 0.0550 |
| SLC25A33   | 0.9565 | 1.0627 | 0.9545 | 0.9298 | 0.9759 | 0.0296 |
| GABPAP     | 0.9661 | 1.0753 | 0.9665 | 0.8956 | 0.9759 | 0.0371 |
| LOC647919  | 0.9323 | 1.1322 | 1.0309 | 0.8081 | 0.9759 | 0.0692 |
| IL16       | 0.8652 | 1.0094 | 1.0981 | 0.9309 | 0.9759 | 0.0503 |
| LOC1001301 | 0.9300 | 1.1405 | 0.9569 | 0.8762 | 0.9759 | 0.0574 |
| MTUS2      | 0.8926 | 1.0945 | 1.0290 | 0.8875 | 0.9759 | 0.0513 |
| AMPD2      | 0.9423 | 1.0667 | 0.9609 | 0.9336 | 0.9759 | 0.0308 |
| MACROD2    | 0.9643 | 1.0694 | 1.0122 | 0.8576 | 0.9759 | 0.0449 |
| LOC1001339 | 0.9935 | 1.0540 | 0.8910 | 0.9651 | 0.9759 | 0.0338 |
| LOC649501  | 0.9012 | 1.1256 | 0.9843 | 0.8925 | 0.9759 | 0.0540 |
| LOC644666  | 0.8903 | 1.0649 | 1.0631 | 0.8854 | 0.9759 | 0.0509 |
| LOC653753  | 0.9406 | 1.0216 | 0.9897 | 0.9518 | 0.9759 | 0.0185 |
| LOC441296  | 0.9975 | 1.0725 | 1.0351 | 0.7985 | 0.9759 | 0.0611 |
| LOC646932  | 0.8708 | 1.0946 | 1.0177 | 0.9205 | 0.9759 | 0.0500 |
| LOC649935  | 0.9626 | 1.0457 | 1.0599 | 0.8355 | 0.9759 | 0.0515 |
| LOC653105  | 0.9618 | 1.0544 | 0.9739 | 0.9135 | 0.9759 | 0.0292 |
| ERCC-00073 | 0.8493 | 1.0718 | 1.0366 | 0.9460 | 0.9759 | 0.0498 |
| CYBB       | 0.8751 | 1.1016 | 0.9804 | 0.9466 | 0.9759 | 0.0473 |
| TIMP1      | 0.9945 | 1.0097 | 1.0209 | 0.8786 | 0.9759 | 0.0329 |
| KDM2B      | 1.0027 | 1.1688 | 0.8934 | 0.8389 | 0.9759 | 0.0727 |
| LOC440067  | 0.9312 | 1.0342 | 0.9111 | 1.0274 | 0.9759 | 0.0319 |
| LDHC       | 0.9226 | 1.0742 | 1.0096 | 0.8974 | 0.9760 | 0.0406 |
| LOC650038  | 0.8873 | 1.0431 | 0.9863 | 0.9871 | 0.9760 | 0.0324 |
| ACTRT1     | 0.8157 | 1.2281 | 0.9724 | 0.8876 | 0.9760 | 0.0899 |



|            |        |        |        |        |        |        |
|------------|--------|--------|--------|--------|--------|--------|
| CDK5       | 1.0463 | 1.2662 | 0.8805 | 0.7108 | 0.9760 | 0.1185 |
| LOC1001344 | 0.9242 | 1.0149 | 1.0209 | 0.9438 | 0.9760 | 0.0246 |
| LOC653458  | 0.9031 | 1.0410 | 0.9820 | 0.9777 | 0.9760 | 0.0282 |
| PKD1L2     | 0.9189 | 1.0658 | 1.0176 | 0.9017 | 0.9760 | 0.0393 |
| LOC646434  | 0.8853 | 1.2137 | 0.9236 | 0.8812 | 0.9760 | 0.0798 |
| MAP3K2     | 0.8457 | 1.0884 | 1.1074 | 0.8624 | 0.9760 | 0.0706 |
| GLYCAM1    | 1.0174 | 1.0532 | 0.9461 | 0.8873 | 0.9760 | 0.0370 |
| LOC652870  | 0.9463 | 1.0301 | 0.9126 | 1.0150 | 0.9760 | 0.0279 |
| LOC654220  | 0.9305 | 1.0516 | 0.9074 | 1.0145 | 0.9760 | 0.0341 |
| SORCS1     | 0.9571 | 1.0878 | 0.9543 | 0.9047 | 0.9760 | 0.0392 |
| ELSPBP1    | 0.9126 | 1.0580 | 1.0946 | 0.8388 | 0.9760 | 0.0603 |
| LOC1001317 | 0.9458 | 1.0177 | 1.0573 | 0.8833 | 0.9760 | 0.0386 |
| LOC653547  | 1.0467 | 1.0201 | 0.9882 | 0.8490 | 0.9760 | 0.0440 |
| NANOS1     | 0.9002 | 1.0895 | 1.0660 | 0.8483 | 0.9760 | 0.0599 |
| COL6A2     | 0.9560 | 1.0323 | 1.0604 | 0.8554 | 0.9760 | 0.0459 |
| GABRG2     | 0.9021 | 1.1030 | 0.9717 | 0.9272 | 0.9760 | 0.0447 |
| PRR4       | 0.8369 | 1.2394 | 0.9802 | 0.8476 | 0.9760 | 0.0936 |
| DKFZP781G0 | 0.8997 | 1.0532 | 1.0412 | 0.9099 | 0.9760 | 0.0412 |
| EXOC3L2    | 0.9930 | 1.0424 | 0.9316 | 0.9371 | 0.9760 | 0.0261 |
| OR5C1      | 0.9537 | 1.1389 | 0.9226 | 0.8889 | 0.9760 | 0.0559 |
| ITGAV      | 0.7581 | 1.2849 | 1.1527 | 0.7085 | 0.9760 | 0.1431 |
| LOC1001299 | 0.9487 | 1.1081 | 0.9821 | 0.8653 | 0.9760 | 0.0504 |
| LOC1001288 | 0.8971 | 1.0583 | 1.0517 | 0.8970 | 0.9760 | 0.0456 |
| REL        | 0.9632 | 0.9834 | 1.0777 | 0.8799 | 0.9760 | 0.0406 |
| PCID2      | 0.7375 | 1.4789 | 0.8841 | 0.8037 | 0.9761 | 0.1703 |
| LOC646021  | 0.9153 | 1.1000 | 0.9455 | 0.9435 | 0.9761 | 0.0419 |
| LOC646043  | 0.9720 | 1.2267 | 0.9062 | 0.7994 | 0.9761 | 0.0908 |
| RGPD5      | 0.9351 | 1.1215 | 0.9626 | 0.8851 | 0.9761 | 0.0511 |
| LOC1001346 | 0.9595 | 1.1571 | 0.8582 | 0.9296 | 0.9761 | 0.0640 |
| LOC644767  | 0.8572 | 1.0333 | 1.0406 | 0.9732 | 0.9761 | 0.0424 |
| LOC645188  | 0.9727 | 1.0257 | 0.9838 | 0.9222 | 0.9761 | 0.0213 |
| LOC642408  | 0.9904 | 1.0628 | 1.0419 | 0.8093 | 0.9761 | 0.0577 |
| C3orf58    | 0.9809 | 1.0571 | 1.0659 | 0.8005 | 0.9761 | 0.0616 |
| LOC646667  | 0.8810 | 1.0046 | 1.0260 | 0.9927 | 0.9761 | 0.0324 |
| BRSK1      | 0.9286 | 1.1918 | 0.8972 | 0.8868 | 0.9761 | 0.0724 |
| LOC728572  | 0.8559 | 0.9574 | 1.1737 | 0.9174 | 0.9761 | 0.0691 |
| LOC647211  | 0.9472 | 1.1491 | 0.9719 | 0.8361 | 0.9761 | 0.0648 |
| LOC641851  | 0.9224 | 0.9600 | 1.1206 | 0.9015 | 0.9761 | 0.0497 |
| LOC729941  | 0.9588 | 1.1350 | 0.9653 | 0.8453 | 0.9761 | 0.0597 |
| ANKRD2     | 0.8871 | 1.0032 | 1.1097 | 0.9044 | 0.9761 | 0.0514 |
| HAND1      | 0.9551 | 0.9516 | 1.0051 | 0.9926 | 0.9761 | 0.0134 |
| FLJ14186   | 0.9130 | 1.0619 | 0.9687 | 0.9609 | 0.9761 | 0.0311 |
| LOC646870  | 0.9520 | 1.1383 | 0.8738 | 0.9404 | 0.9761 | 0.0567 |
| GPR158     | 0.9530 | 1.0785 | 0.9768 | 0.8962 | 0.9761 | 0.0381 |
| C6orf184   | 0.9310 | 1.0591 | 0.9759 | 0.9384 | 0.9761 | 0.0293 |
| SH3GL2     | 0.9441 | 1.0354 | 0.9639 | 0.9610 | 0.9761 | 0.0203 |

|            |        |        |        |        |        |        |
|------------|--------|--------|--------|--------|--------|--------|
| FBN3       | 0.9004 | 1.0683 | 1.0283 | 0.9075 | 0.9761 | 0.0425 |
| LOC642759  | 1.0166 | 1.0222 | 0.8832 | 0.9825 | 0.9761 | 0.0322 |
| KCNJ10     | 0.8811 | 1.1258 | 0.8425 | 1.0551 | 0.9761 | 0.0680 |
| LOC1001342 | 0.8712 | 1.1784 | 0.9090 | 0.9460 | 0.9761 | 0.0691 |
| UNC93B1    | 0.8258 | 1.2865 | 1.0520 | 0.7402 | 0.9761 | 0.1226 |
| LOC1001283 | 0.9575 | 1.1715 | 1.0447 | 0.7309 | 0.9761 | 0.0928 |
| MIR1185-1  | 0.8698 | 1.1676 | 1.0000 | 0.8672 | 0.9761 | 0.0709 |
| LOC728530  | 0.8079 | 1.1287 | 1.0314 | 0.9366 | 0.9762 | 0.0684 |
| LOC728901  | 0.9109 | 0.9872 | 1.0584 | 0.9481 | 0.9762 | 0.0315 |
| LOC729397  | 0.9705 | 1.0141 | 1.0131 | 0.9069 | 0.9762 | 0.0252 |
| C3orf60    | 0.9248 | 1.1040 | 1.0243 | 0.8516 | 0.9762 | 0.0554 |
| LOC729601  | 0.9465 | 1.0650 | 0.9913 | 0.9019 | 0.9762 | 0.0348 |
| APOC3      | 0.9233 | 1.0485 | 1.0261 | 0.9067 | 0.9762 | 0.0358 |
| CLEC1A     | 0.9762 | 1.0498 | 0.9781 | 0.9006 | 0.9762 | 0.0305 |
| PRODH2     | 0.8612 | 1.0779 | 1.0794 | 0.8863 | 0.9762 | 0.0594 |
| LOC389257  | 0.9795 | 1.0458 | 0.8353 | 1.0440 | 0.9762 | 0.0494 |
| LILRA6     | 0.9574 | 1.0343 | 0.9991 | 0.9139 | 0.9762 | 0.0260 |
| MYL12A     | 0.8472 | 1.1885 | 1.0895 | 0.7795 | 0.9762 | 0.0972 |
| LOC643847  | 0.9159 | 1.0407 | 1.0332 | 0.9149 | 0.9762 | 0.0351 |
| MAML2      | 0.9467 | 1.0548 | 0.9583 | 0.9450 | 0.9762 | 0.0264 |
| LOC400578  | 0.9480 | 1.0856 | 0.9964 | 0.8747 | 0.9762 | 0.0442 |
| LOC1001318 | 0.9798 | 1.1324 | 1.0049 | 0.7877 | 0.9762 | 0.0712 |
| BCL2L14    | 0.9321 | 1.0701 | 0.9579 | 0.9447 | 0.9762 | 0.0318 |
| RSPO3      | 0.9161 | 1.0714 | 1.0377 | 0.8796 | 0.9762 | 0.0464 |
| LOC391746  | 0.9569 | 1.1469 | 0.9479 | 0.8532 | 0.9762 | 0.0615 |
| ASGR2      | 0.9353 | 1.1171 | 0.9310 | 0.9215 | 0.9762 | 0.0471 |
| LOC162632  | 0.9215 | 1.0754 | 1.0048 | 0.9032 | 0.9762 | 0.0398 |
| OVOS2      | 0.9508 | 1.0445 | 1.0212 | 0.8884 | 0.9762 | 0.0354 |
| ELFN2      | 0.9059 | 1.1113 | 0.9821 | 0.9056 | 0.9762 | 0.0485 |
| MGC87042   | 0.8846 | 1.3016 | 1.0181 | 0.7005 | 0.9762 | 0.1265 |
| LOC1001299 | 0.8871 | 1.1411 | 0.9945 | 0.8822 | 0.9762 | 0.0608 |
| LOC642645  | 0.8989 | 0.9655 | 1.0588 | 0.9817 | 0.9762 | 0.0328 |
| LOC1001290 | 1.0438 | 1.1317 | 0.8729 | 0.8566 | 0.9762 | 0.0669 |
| XRRA1      | 0.9915 | 0.9851 | 1.0689 | 0.8594 | 0.9762 | 0.0433 |
| MEIS2      | 0.9726 | 1.0507 | 0.9491 | 0.9326 | 0.9763 | 0.0261 |
| EXOC6B     | 0.9317 | 1.0372 | 0.9925 | 0.9435 | 0.9763 | 0.0242 |
| CHRD12     | 0.8618 | 1.1100 | 1.0573 | 0.8759 | 0.9763 | 0.0630 |
| LOC654259  | 0.8330 | 1.1391 | 1.0638 | 0.8692 | 0.9763 | 0.0742 |
| FRMPD2L1   | 0.8953 | 1.1069 | 0.9973 | 0.9056 | 0.9763 | 0.0492 |
| SPANXF1    | 0.8913 | 1.1105 | 0.9707 | 0.9325 | 0.9763 | 0.0476 |
| PNLIPRP3   | 0.8891 | 1.0222 | 1.0270 | 0.9668 | 0.9763 | 0.0321 |
| LOC1001344 | 0.8969 | 1.0334 | 1.0687 | 0.9062 | 0.9763 | 0.0438 |
| MAGEC3     | 0.9563 | 1.0443 | 0.9704 | 0.9342 | 0.9763 | 0.0238 |
| NFIX       | 0.9135 | 1.2440 | 0.9926 | 0.7551 | 0.9763 | 0.1020 |
| LOC649762  | 0.8592 | 1.0814 | 0.9876 | 0.9770 | 0.9763 | 0.0455 |
| LOC1001339 | 0.8753 | 1.0879 | 0.9345 | 1.0075 | 0.9763 | 0.0460 |

|            |        |        |        |        |        |        |
|------------|--------|--------|--------|--------|--------|--------|
| NKPD1      | 0.9223 | 1.0135 | 1.0835 | 0.8859 | 0.9763 | 0.0447 |
| LOC643130  | 0.9300 | 1.1423 | 0.9621 | 0.8708 | 0.9763 | 0.0585 |
| LOC374768  | 0.8108 | 1.0325 | 1.0996 | 0.9624 | 0.9763 | 0.0619 |
| SDCCAG8    | 0.9496 | 1.1061 | 0.9770 | 0.8726 | 0.9763 | 0.0486 |
| SERPINA2   | 0.9425 | 1.0219 | 1.0060 | 0.9349 | 0.9763 | 0.0220 |
| LOC653904  | 0.9228 | 1.1348 | 0.8964 | 0.9513 | 0.9763 | 0.0540 |
| ZNF705D    | 0.9436 | 1.1327 | 0.9404 | 0.8886 | 0.9763 | 0.0536 |
| EPHB6      | 0.8977 | 1.1450 | 1.0058 | 0.8569 | 0.9763 | 0.0644 |
| LOC1001322 | 0.8857 | 1.1480 | 0.9624 | 0.9092 | 0.9763 | 0.0594 |
| LOC723805  | 0.9018 | 1.1878 | 0.9717 | 0.8440 | 0.9763 | 0.0752 |
| CAGE1      | 0.9450 | 1.0350 | 1.0360 | 0.8893 | 0.9763 | 0.0360 |
| BRAP       | 0.9390 | 1.0689 | 0.9351 | 0.9624 | 0.9763 | 0.0314 |
| OR6C65     | 0.8732 | 1.0106 | 1.0009 | 1.0206 | 0.9763 | 0.0346 |
| GPRC5D     | 0.9634 | 1.1050 | 1.0251 | 0.8119 | 0.9763 | 0.0620 |
| LGR8       | 0.9606 | 0.9596 | 1.0082 | 0.9770 | 0.9764 | 0.0113 |
| ANGPTL4    | 0.9784 | 1.0925 | 0.9846 | 0.8500 | 0.9764 | 0.0496 |
| LOC653252  | 0.9485 | 1.0449 | 0.9526 | 0.9594 | 0.9764 | 0.0230 |
| RBMV2FP    | 0.9306 | 1.1037 | 1.0525 | 0.8186 | 0.9764 | 0.0639 |
| RG9MTD2    | 0.9150 | 1.1711 | 1.0170 | 0.8024 | 0.9764 | 0.0783 |
| ALKBH7     | 0.7158 | 1.3296 | 1.0751 | 0.7850 | 0.9764 | 0.1411 |
| FAM123A    | 0.8822 | 1.0734 | 0.9934 | 0.9565 | 0.9764 | 0.0398 |
| FLJ44790   | 0.9153 | 1.1734 | 0.9225 | 0.8943 | 0.9764 | 0.0659 |
| PTGS1      | 0.9198 | 1.1149 | 1.0671 | 0.8038 | 0.9764 | 0.0709 |
| FTCD       | 0.9726 | 1.0763 | 0.9545 | 0.9022 | 0.9764 | 0.0365 |
| LOC285047  | 0.9587 | 0.9905 | 1.0825 | 0.8739 | 0.9764 | 0.0431 |
| THSD3      | 0.8885 | 1.1268 | 1.0094 | 0.8810 | 0.9764 | 0.0581 |
| TSSC4      | 0.8584 | 1.3854 | 0.8906 | 0.7712 | 0.9764 | 0.1386 |
| FAM78A     | 0.8818 | 1.0093 | 1.0939 | 0.9206 | 0.9764 | 0.0474 |
| SNORA30    | 0.9313 | 1.0218 | 1.0351 | 0.9173 | 0.9764 | 0.0303 |
| NUFIP2     | 0.7849 | 1.3193 | 1.0611 | 0.7404 | 0.9764 | 0.1345 |
| FKBP14     | 0.8718 | 1.2786 | 0.9663 | 0.7889 | 0.9764 | 0.1070 |
| LOC642574  | 0.8948 | 1.0396 | 1.0401 | 0.9313 | 0.9764 | 0.0374 |
| ECHS1      | 0.7088 | 1.4079 | 1.0943 | 0.6948 | 0.9764 | 0.1710 |
| LOC729837  | 0.8608 | 1.0953 | 1.0175 | 0.9322 | 0.9764 | 0.0509 |
| LOC649722  | 0.9430 | 1.0791 | 0.9863 | 0.8973 | 0.9764 | 0.0388 |
| LOC728317  | 0.9955 | 1.0367 | 0.9974 | 0.8761 | 0.9764 | 0.0348 |
| ADCYAP1R1  | 0.8881 | 0.9672 | 1.0869 | 0.9636 | 0.9764 | 0.0411 |
| LOC1001326 | 0.9206 | 1.0436 | 1.1159 | 0.8257 | 0.9765 | 0.0644 |
| MYEOV      | 0.9416 | 1.0822 | 0.9999 | 0.8822 | 0.9765 | 0.0427 |
| LOC644846  | 0.9517 | 1.0584 | 0.9705 | 0.9252 | 0.9765 | 0.0289 |
| LOC645408  | 1.0940 | 0.9561 | 0.9151 | 0.9407 | 0.9765 | 0.0401 |
| MGC40170   | 1.0432 | 1.1109 | 0.8810 | 0.8707 | 0.9765 | 0.0598 |
| CPB1       | 0.9107 | 1.1342 | 0.9983 | 0.8627 | 0.9765 | 0.0596 |
| HBS1L      | 0.9467 | 1.0969 | 1.0096 | 0.8527 | 0.9765 | 0.0515 |
| TPSB2      | 0.9544 | 1.1539 | 0.8481 | 0.9495 | 0.9765 | 0.0640 |
| FUT3       | 0.9712 | 1.1189 | 0.8767 | 0.9391 | 0.9765 | 0.0514 |

|            |        |        |        |        |        |        |
|------------|--------|--------|--------|--------|--------|--------|
| PDX1       | 0.9270 | 1.0077 | 1.1564 | 0.8148 | 0.9765 | 0.0719 |
| KNCN       | 0.8644 | 1.0918 | 1.0412 | 0.9086 | 0.9765 | 0.0537 |
| C16orf90   | 0.9066 | 1.0598 | 0.9840 | 0.9556 | 0.9765 | 0.0320 |
| LOC643813  | 1.0209 | 0.9891 | 1.0201 | 0.8758 | 0.9765 | 0.0344 |
| FLJ40453   | 0.9232 | 1.0340 | 1.0587 | 0.8900 | 0.9765 | 0.0412 |
| LOC647447  | 0.9326 | 1.0341 | 1.0211 | 0.9182 | 0.9765 | 0.0298 |
| DENND4A    | 0.9565 | 1.1428 | 0.9651 | 0.8416 | 0.9765 | 0.0622 |
| LOC653272  | 0.9123 | 1.1680 | 0.9361 | 0.8896 | 0.9765 | 0.0645 |
| LOC642969  | 1.0190 | 1.0572 | 1.0201 | 0.8097 | 0.9765 | 0.0563 |
| FLJ42957   | 0.9889 | 0.9877 | 1.0211 | 0.9082 | 0.9765 | 0.0240 |
| SNTB1      | 0.9631 | 1.0522 | 0.9479 | 0.9429 | 0.9765 | 0.0256 |
| NCRNA00181 | 0.9396 | 1.0538 | 0.9907 | 0.9219 | 0.9765 | 0.0296 |
| LOC1001313 | 0.8500 | 1.1035 | 1.0674 | 0.8851 | 0.9765 | 0.0637 |
| RAD23A     | 0.8926 | 1.2845 | 1.0670 | 0.6620 | 0.9765 | 0.1320 |
| DEFB133    | 1.0319 | 0.9938 | 0.9461 | 0.9343 | 0.9765 | 0.0225 |
| HOXA2      | 0.9054 | 1.1096 | 0.9980 | 0.8930 | 0.9765 | 0.0502 |
| IGLL1      | 0.9246 | 1.0257 | 1.0678 | 0.8881 | 0.9765 | 0.0421 |
| SACS       | 0.8937 | 1.1164 | 1.0399 | 0.8561 | 0.9765 | 0.0612 |
| LOC651758  | 1.0189 | 1.1465 | 0.9194 | 0.8214 | 0.9765 | 0.0695 |
| PSMD12     | 0.8580 | 1.3177 | 1.0186 | 0.7119 | 0.9766 | 0.1298 |
| LOC728924  | 0.9596 | 1.1271 | 1.0247 | 0.7949 | 0.9766 | 0.0697 |
| LOC727916  | 0.9709 | 1.0551 | 0.9711 | 0.9091 | 0.9766 | 0.0300 |
| MED13L     | 0.9922 | 1.1157 | 0.9751 | 0.8234 | 0.9766 | 0.0599 |
| MYH16      | 0.9124 | 1.0561 | 1.0082 | 0.9295 | 0.9766 | 0.0337 |
| KRTAP17-1  | 0.9352 | 0.9859 | 1.0474 | 0.9378 | 0.9766 | 0.0263 |
| LOC1001322 | 0.9291 | 1.1187 | 0.9166 | 0.9419 | 0.9766 | 0.0477 |
| LOC401087  | 0.9525 | 1.2197 | 0.9313 | 0.8028 | 0.9766 | 0.0875 |
| FLJ43080   | 0.8635 | 1.1068 | 1.0366 | 0.8994 | 0.9766 | 0.0572 |
| LOC645289  | 0.9881 | 1.0876 | 0.9861 | 0.8446 | 0.9766 | 0.0500 |
| C7orf45    | 0.9073 | 1.0934 | 0.9787 | 0.9270 | 0.9766 | 0.0417 |
| LOC654208  | 0.9415 | 0.9914 | 1.0443 | 0.9292 | 0.9766 | 0.0263 |
| LOC1001307 | 0.8930 | 1.2725 | 1.0415 | 0.6995 | 0.9766 | 0.1209 |
| C6orf195   | 0.8658 | 1.0686 | 1.0153 | 0.9569 | 0.9766 | 0.0434 |
| GSTA3      | 0.9426 | 1.0980 | 0.9736 | 0.8923 | 0.9766 | 0.0438 |
| LAIR2      | 0.8755 | 1.0107 | 1.0392 | 0.9811 | 0.9766 | 0.0357 |
| SH2D1A     | 0.9147 | 1.1058 | 1.0503 | 0.8357 | 0.9766 | 0.0618 |
| LOC643985  | 0.9155 | 1.0621 | 1.1161 | 0.8129 | 0.9766 | 0.0691 |
| LOC345222  | 0.9939 | 1.0643 | 1.1270 | 0.7214 | 0.9766 | 0.0893 |
| LOC653136  | 0.9370 | 1.0807 | 0.9473 | 0.9416 | 0.9767 | 0.0347 |
| LOC646119  | 0.9409 | 1.0344 | 1.0237 | 0.9076 | 0.9767 | 0.0311 |
| C1orf151   | 0.8229 | 1.1772 | 1.0389 | 0.8677 | 0.9767 | 0.0814 |
| RIMBP3C    | 0.9102 | 1.0293 | 1.0135 | 0.9537 | 0.9767 | 0.0275 |
| LOC654023  | 0.9919 | 1.0958 | 0.9059 | 0.9131 | 0.9767 | 0.0442 |
| MGC4294    | 0.9421 | 1.0457 | 0.9824 | 0.9365 | 0.9767 | 0.0252 |
| LOC648827  | 0.9872 | 1.0270 | 0.9817 | 0.9109 | 0.9767 | 0.0241 |
| LOC727951  | 0.7960 | 1.1212 | 1.0230 | 0.9665 | 0.9767 | 0.0682 |

|            |        |        |        |        |        |        |
|------------|--------|--------|--------|--------|--------|--------|
| LOC389787  | 0.7868 | 1.0670 | 1.4121 | 0.6408 | 0.9767 | 0.1699 |
| LOC1001303 | 0.9225 | 1.1694 | 0.8784 | 0.9365 | 0.9767 | 0.0654 |
| LOC642164  | 0.8933 | 1.1069 | 0.9768 | 0.9297 | 0.9767 | 0.0467 |
| ALPK3      | 1.0486 | 1.0204 | 0.9582 | 0.8796 | 0.9767 | 0.0375 |
| LOC646934  | 0.8930 | 1.0550 | 1.0454 | 0.9133 | 0.9767 | 0.0427 |
| LOC1001325 | 0.8620 | 1.0233 | 1.2873 | 0.7342 | 0.9767 | 0.1192 |
| FRY        | 0.9676 | 1.0562 | 0.9801 | 0.9028 | 0.9767 | 0.0315 |
| GPR123     | 0.9518 | 1.0550 | 0.9818 | 0.9182 | 0.9767 | 0.0292 |
| LOC647541  | 0.8793 | 1.1288 | 0.9974 | 0.9012 | 0.9767 | 0.0568 |
| LOC1001332 | 0.8522 | 1.1649 | 1.1221 | 0.7676 | 0.9767 | 0.0982 |
| CYP7B1     | 0.9614 | 1.0322 | 1.0110 | 0.9022 | 0.9767 | 0.0289 |
| LOC651012  | 1.0222 | 0.9192 | 0.9617 | 1.0037 | 0.9767 | 0.0230 |
| LOC389442  | 1.0442 | 1.0414 | 0.9809 | 0.8403 | 0.9767 | 0.0478 |
| MFSD4      | 0.9682 | 1.0942 | 1.0185 | 0.8259 | 0.9767 | 0.0566 |
| DDX19-DDX1 | 0.9512 | 1.1567 | 0.8400 | 0.9589 | 0.9767 | 0.0659 |
| LOC645393  | 0.9768 | 0.9639 | 1.1142 | 0.8520 | 0.9767 | 0.0537 |
| C3orf43    | 0.9845 | 1.0876 | 0.9966 | 0.8382 | 0.9767 | 0.0516 |
| LOC731823  | 0.9375 | 1.0446 | 0.9396 | 0.9852 | 0.9767 | 0.0252 |
| CCDC105    | 0.9494 | 1.0632 | 1.0094 | 0.8850 | 0.9767 | 0.0384 |
| NBEAL1     | 0.8778 | 1.2034 | 1.0218 | 0.8040 | 0.9767 | 0.0881 |
| LOC1001310 | 0.9248 | 1.0801 | 1.0556 | 0.8463 | 0.9767 | 0.0552 |
| FLJ25076   | 0.9603 | 1.0660 | 1.0280 | 0.8527 | 0.9767 | 0.0468 |
| RP1L1      | 0.9606 | 1.0866 | 0.9738 | 0.8859 | 0.9767 | 0.0414 |
| ARHGAP4    | 0.9265 | 1.1993 | 0.9565 | 0.8246 | 0.9767 | 0.0794 |
| LOC255809  | 0.8286 | 1.1000 | 0.9822 | 0.9961 | 0.9767 | 0.0559 |
| LOC642419  | 0.8944 | 1.1721 | 0.9601 | 0.8803 | 0.9767 | 0.0674 |
| LOC644253  | 0.9358 | 1.0027 | 0.9981 | 0.9703 | 0.9767 | 0.0154 |
| LOC642853  | 0.9596 | 1.1489 | 0.8463 | 0.9521 | 0.9767 | 0.0630 |
| OR6N2      | 0.9876 | 0.9787 | 0.9790 | 0.9617 | 0.9767 | 0.0054 |
| LOC255313  | 0.8815 | 0.9776 | 1.0422 | 1.0057 | 0.9767 | 0.0344 |
| TSPAN32    | 0.9433 | 1.0698 | 0.9685 | 0.9255 | 0.9767 | 0.0322 |
| OR56B4     | 0.9472 | 0.9962 | 1.0696 | 0.8940 | 0.9768 | 0.0373 |
| PARP4      | 0.8750 | 1.4047 | 0.9676 | 0.6597 | 0.9768 | 0.1566 |
| HYDIN      | 0.9502 | 1.0488 | 1.0059 | 0.9022 | 0.9768 | 0.0320 |
| C2orf27A   | 1.0198 | 1.0014 | 0.9959 | 0.8899 | 0.9768 | 0.0294 |
| CAPN10     | 0.9513 | 1.0693 | 1.0181 | 0.8683 | 0.9768 | 0.0435 |
| ZNF663     | 0.9321 | 1.0124 | 1.0556 | 0.9069 | 0.9768 | 0.0346 |
| LOC284688  | 0.8648 | 1.0799 | 1.0456 | 0.9167 | 0.9768 | 0.0513 |
| LOC1001320 | 0.8817 | 1.0834 | 1.0440 | 0.8980 | 0.9768 | 0.0509 |
| ESAM       | 0.9557 | 1.0010 | 1.0379 | 0.9125 | 0.9768 | 0.0272 |
| LOC730496  | 0.8545 | 1.1372 | 1.0938 | 0.8217 | 0.9768 | 0.0808 |
| LOC653899  | 0.9938 | 0.9715 | 0.9887 | 0.9532 | 0.9768 | 0.0092 |
| MIR220C    | 0.8832 | 1.0019 | 1.0760 | 0.9460 | 0.9768 | 0.0410 |
| HSFY2      | 0.9597 | 1.0537 | 1.0011 | 0.8927 | 0.9768 | 0.0340 |
| CD163      | 0.9006 | 1.0753 | 0.9925 | 0.9387 | 0.9768 | 0.0379 |
| GALNT17    | 0.9265 | 0.9591 | 0.9747 | 1.0470 | 0.9768 | 0.0255 |

|            |        |        |        |        |        |        |
|------------|--------|--------|--------|--------|--------|--------|
| PPP4R4     | 0.9376 | 1.0344 | 1.0224 | 0.9128 | 0.9768 | 0.0303 |
| OR4L1      | 0.9171 | 1.0426 | 1.0221 | 0.9254 | 0.9768 | 0.0324 |
| SSX6       | 0.9164 | 1.0440 | 1.0509 | 0.8959 | 0.9768 | 0.0410 |
| LOC646303  | 0.9219 | 1.0662 | 1.0257 | 0.8934 | 0.9768 | 0.0412 |
| COLQ       | 0.9081 | 1.0871 | 1.0340 | 0.8781 | 0.9768 | 0.0499 |
| FLJ34690   | 0.9532 | 0.9749 | 1.0677 | 0.9114 | 0.9768 | 0.0330 |
| ALS2CR16   | 0.9140 | 1.0271 | 0.9756 | 0.9906 | 0.9768 | 0.0236 |
| CLTA       | 0.8554 | 1.3698 | 0.9086 | 0.7735 | 0.9768 | 0.1339 |
| LOC728142  | 0.9439 | 1.1755 | 0.9950 | 0.7928 | 0.9768 | 0.0789 |
| LOC643594  | 0.9393 | 0.9248 | 1.1005 | 0.9427 | 0.9768 | 0.0414 |
| SPIB       | 0.8768 | 1.1473 | 1.0422 | 0.8412 | 0.9768 | 0.0717 |
| ERCC-00069 | 1.0739 | 1.0615 | 0.8870 | 0.8850 | 0.9768 | 0.0525 |
| LOC653387  | 0.9382 | 1.0430 | 1.0048 | 0.9215 | 0.9768 | 0.0284 |
| GATM       | 0.9328 | 1.0624 | 0.9570 | 0.9551 | 0.9768 | 0.0290 |
| KIAA1984   | 0.9870 | 1.1270 | 0.9495 | 0.8439 | 0.9768 | 0.0585 |
| LOC643341  | 0.9704 | 0.9919 | 0.9742 | 0.9709 | 0.9768 | 0.0051 |
| OR13F1     | 0.9541 | 1.0252 | 1.0078 | 0.9203 | 0.9769 | 0.0241 |
| MIR152     | 0.8408 | 1.1038 | 1.0890 | 0.8738 | 0.9769 | 0.0694 |
| MIR7-2     | 0.9175 | 1.0353 | 0.9782 | 0.9764 | 0.9769 | 0.0241 |
| GNLY       | 0.8857 | 1.0598 | 1.0603 | 0.9016 | 0.9769 | 0.0482 |
| LOC1001305 | 0.9931 | 1.0238 | 0.9726 | 0.9179 | 0.9769 | 0.0223 |
| FLJ46446   | 1.0909 | 0.9608 | 0.9695 | 0.8862 | 0.9769 | 0.0424 |
| LOC442270  | 0.9691 | 1.1511 | 0.9651 | 0.8221 | 0.9769 | 0.0674 |
| SYCE1L     | 0.9479 | 1.0782 | 1.0072 | 0.8742 | 0.9769 | 0.0434 |
| CLK2P      | 0.9489 | 1.1761 | 0.9135 | 0.8690 | 0.9769 | 0.0684 |
| LOC653493  | 0.8640 | 1.0187 | 1.0332 | 0.9917 | 0.9769 | 0.0386 |
| NOX4       | 0.9073 | 1.0800 | 1.0118 | 0.9085 | 0.9769 | 0.0422 |
| PRRT1      | 0.8752 | 1.0798 | 1.0976 | 0.8551 | 0.9769 | 0.0648 |
| MPP3       | 1.0638 | 1.0001 | 0.9725 | 0.8712 | 0.9769 | 0.0401 |
| SCGB2A2    | 1.0003 | 0.9968 | 1.0228 | 0.8877 | 0.9769 | 0.0303 |
| LOC390251  | 0.9519 | 1.0007 | 0.9926 | 0.9626 | 0.9769 | 0.0117 |
| CRNKL1     | 0.9057 | 1.1854 | 0.9221 | 0.8945 | 0.9769 | 0.0697 |
| LOC728211  | 0.8828 | 1.1486 | 0.9637 | 0.9126 | 0.9769 | 0.0596 |
| IL12RB1    | 0.9508 | 1.0986 | 1.0283 | 0.8300 | 0.9769 | 0.0575 |
| KIAA1210   | 0.9106 | 1.1574 | 0.9629 | 0.8768 | 0.9769 | 0.0627 |
| N4BP3      | 0.9696 | 1.0686 | 1.0113 | 0.8582 | 0.9769 | 0.0445 |
| LPCAT1     | 1.0207 | 1.2081 | 1.0225 | 0.6563 | 0.9769 | 0.1156 |
| LOC400965  | 0.9018 | 1.1209 | 1.0743 | 0.8107 | 0.9769 | 0.0727 |
| LOC644489  | 0.8791 | 1.1597 | 0.9351 | 0.9338 | 0.9769 | 0.0623 |
| P2RY6      | 0.9298 | 1.0277 | 1.0190 | 0.9312 | 0.9769 | 0.0269 |
| LOC644602  | 0.9253 | 0.9444 | 1.0637 | 0.9743 | 0.9769 | 0.0306 |
| LOC653037  | 0.9652 | 1.0845 | 0.9592 | 0.8989 | 0.9769 | 0.0389 |
| OTOA       | 0.9221 | 1.0359 | 1.0091 | 0.9407 | 0.9769 | 0.0271 |
| LOC650687  | 1.0274 | 0.9750 | 1.0270 | 0.8784 | 0.9769 | 0.0351 |
| LOC1001295 | 0.9217 | 1.0490 | 1.0197 | 0.9175 | 0.9770 | 0.0337 |
| LOC440422  | 1.0032 | 1.0350 | 1.0268 | 0.8428 | 0.9770 | 0.0452 |

|            |        |        |        |        |        |        |
|------------|--------|--------|--------|--------|--------|--------|
| RMST       | 0.8985 | 1.0958 | 1.0563 | 0.8574 | 0.9770 | 0.0584 |
| LOC1001299 | 0.9783 | 1.0202 | 1.0574 | 0.8520 | 0.9770 | 0.0447 |
| LOC1001334 | 0.9772 | 1.0678 | 1.0450 | 0.8179 | 0.9770 | 0.0564 |
| C1orf83    | 1.0237 | 1.0957 | 0.9689 | 0.8196 | 0.9770 | 0.0585 |
| LOC642351  | 0.9188 | 1.0063 | 1.1156 | 0.8672 | 0.9770 | 0.0544 |
| LOC643206  | 0.8671 | 1.1740 | 0.8876 | 0.9792 | 0.9770 | 0.0700 |
| CALY       | 0.9320 | 1.1541 | 0.9457 | 0.8761 | 0.9770 | 0.0609 |
| LOC1001342 | 1.0386 | 0.9811 | 1.0204 | 0.8678 | 0.9770 | 0.0383 |
| LOC1001321 | 0.9128 | 1.0498 | 1.0597 | 0.8857 | 0.9770 | 0.0453 |
| PNPLA8     | 0.9117 | 1.1474 | 1.0782 | 0.7706 | 0.9770 | 0.0847 |
| LOC728765  | 0.9758 | 1.0102 | 1.0177 | 0.9044 | 0.9770 | 0.0259 |
| TLE4       | 0.9750 | 1.0584 | 0.9579 | 0.9167 | 0.9770 | 0.0298 |
| LOC727781  | 0.9341 | 1.0418 | 0.9822 | 0.9499 | 0.9770 | 0.0238 |
| LOC652712  | 0.9008 | 1.1489 | 1.0223 | 0.8360 | 0.9770 | 0.0691 |
| STK3       | 0.7575 | 1.3628 | 1.1029 | 0.6848 | 0.9770 | 0.1577 |
| MIR99B     | 0.9368 | 1.0977 | 1.0242 | 0.8493 | 0.9770 | 0.0538 |
| LOC648277  | 0.9485 | 1.1794 | 0.9658 | 0.8144 | 0.9770 | 0.0755 |
| LOC1001287 | 0.9508 | 1.0720 | 0.9878 | 0.8975 | 0.9770 | 0.0367 |
| LOC729679  | 0.6214 | 1.3888 | 1.1432 | 0.7547 | 0.9770 | 0.1763 |
| LOC1001315 | 0.9232 | 1.0186 | 1.0934 | 0.8729 | 0.9770 | 0.0492 |
| SHC2       | 0.8912 | 1.0969 | 1.0101 | 0.9099 | 0.9770 | 0.0477 |
| LCN6       | 0.9374 | 1.1044 | 0.9082 | 0.9581 | 0.9770 | 0.0437 |
| LOC339760  | 0.9186 | 1.1476 | 1.0522 | 0.7898 | 0.9770 | 0.0781 |
| PRKD2      | 1.0347 | 1.0751 | 1.0260 | 0.7723 | 0.9770 | 0.0691 |
| LOC644928  | 0.8363 | 1.2286 | 1.1658 | 0.6775 | 0.9770 | 0.1318 |
| ERCC-00077 | 0.9752 | 0.9833 | 1.0561 | 0.8936 | 0.9770 | 0.0332 |
| HIST1H4J   | 0.9820 | 0.9280 | 1.1116 | 0.8866 | 0.9770 | 0.0489 |
| LOC1001311 | 0.8699 | 1.1647 | 0.9628 | 0.9108 | 0.9770 | 0.0654 |
| OR7D4      | 1.0458 | 0.8969 | 1.0314 | 0.9341 | 0.9771 | 0.0365 |
| CLEC4C     | 0.8930 | 1.0609 | 1.0562 | 0.8982 | 0.9771 | 0.0471 |
| LOC645282  | 0.9521 | 1.1534 | 0.9695 | 0.8332 | 0.9771 | 0.0661 |
| FDXACB1    | 0.9610 | 1.1129 | 0.9947 | 0.8397 | 0.9771 | 0.0562 |
| LOC440438  | 0.9159 | 1.0793 | 0.9457 | 0.9673 | 0.9771 | 0.0357 |
| LOC645027  | 0.9769 | 1.0069 | 1.0312 | 0.8933 | 0.9771 | 0.0300 |
| SNORA11C   | 0.9015 | 1.1105 | 0.9860 | 0.9103 | 0.9771 | 0.0484 |
| CAPN9      | 1.0011 | 1.0842 | 0.9612 | 0.8618 | 0.9771 | 0.0462 |
| LOC729150  | 0.9100 | 0.9314 | 1.0118 | 1.0552 | 0.9771 | 0.0340 |
| C14orf1    | 1.0618 | 0.9853 | 0.9566 | 0.9046 | 0.9771 | 0.0328 |
| SYT10      | 0.9568 | 0.9313 | 1.0287 | 0.9915 | 0.9771 | 0.0212 |
| LOC1001291 | 0.8131 | 1.0757 | 1.0021 | 1.0174 | 0.9771 | 0.0569 |
| APEG1      | 0.7708 | 1.0902 | 1.0122 | 1.0351 | 0.9771 | 0.0707 |
| IFNA13     | 0.9313 | 1.0508 | 1.0085 | 0.9178 | 0.9771 | 0.0317 |
| LOC652441  | 0.9750 | 1.0242 | 1.0467 | 0.8625 | 0.9771 | 0.0410 |
| RGL3       | 0.9794 | 1.1356 | 0.9677 | 0.8257 | 0.9771 | 0.0633 |
| LOC1001308 | 0.9462 | 1.0137 | 1.0221 | 0.9265 | 0.9771 | 0.0240 |
| ASCL1      | 0.9707 | 0.9828 | 1.0660 | 0.8889 | 0.9771 | 0.0362 |

|            |        |        |        |        |        |        |
|------------|--------|--------|--------|--------|--------|--------|
| SIN3A      | 0.7547 | 1.4790 | 0.8931 | 0.7816 | 0.9771 | 0.1700 |
| TTC8       | 0.7175 | 1.5138 | 0.8622 | 0.8150 | 0.9771 | 0.1814 |
| ITGB4      | 0.9484 | 1.0461 | 1.0136 | 0.9004 | 0.9771 | 0.0327 |
| LOC644624  | 0.9362 | 1.1136 | 0.9467 | 0.9120 | 0.9771 | 0.0461 |
| PIK3C3     | 1.0033 | 1.0423 | 1.1728 | 0.6901 | 0.9771 | 0.1023 |
| ENTPD8     | 0.9316 | 1.1225 | 0.9921 | 0.8623 | 0.9771 | 0.0552 |
| LOC1001321 | 0.9343 | 1.0991 | 0.9658 | 0.9093 | 0.9771 | 0.0423 |
| CPLX4      | 0.8948 | 1.1315 | 0.9707 | 0.9116 | 0.9771 | 0.0540 |
| PSMB9      | 0.9806 | 1.0516 | 0.9943 | 0.8821 | 0.9771 | 0.0352 |
| SLC25A41   | 0.8945 | 1.0396 | 1.0651 | 0.9095 | 0.9772 | 0.0438 |
| AMPD3      | 0.9372 | 1.0697 | 0.9961 | 0.9056 | 0.9772 | 0.0361 |
| MIR632     | 0.8552 | 1.2047 | 1.0334 | 0.8154 | 0.9772 | 0.0894 |
| LOC652405  | 0.8381 | 1.0352 | 1.1278 | 0.9076 | 0.9772 | 0.0647 |
| C9orf38    | 0.9072 | 1.0789 | 1.0123 | 0.9102 | 0.9772 | 0.0418 |
| LOC729177  | 0.8172 | 1.1196 | 1.0787 | 0.8931 | 0.9772 | 0.0726 |
| RNU12      | 0.9324 | 1.0339 | 0.9923 | 0.9501 | 0.9772 | 0.0227 |
| LOC645040  | 0.9574 | 0.9466 | 1.0481 | 0.9567 | 0.9772 | 0.0238 |
| PTPN20A    | 0.8382 | 1.1099 | 1.0699 | 0.8907 | 0.9772 | 0.0665 |
| ZNF594     | 0.8555 | 1.0709 | 1.0092 | 0.9731 | 0.9772 | 0.0453 |
| DCAMKL3    | 0.8791 | 1.1004 | 0.9915 | 0.9377 | 0.9772 | 0.0471 |
| C16orf38   | 0.9258 | 1.1112 | 1.0119 | 0.8599 | 0.9772 | 0.0544 |
| WNT8B      | 0.9763 | 1.0221 | 1.0026 | 0.9076 | 0.9772 | 0.0250 |
| LOC728933  | 0.9964 | 0.9949 | 1.0433 | 0.8741 | 0.9772 | 0.0362 |
| PHF8       | 0.9510 | 1.0133 | 0.9440 | 1.0005 | 0.9772 | 0.0174 |
| PRKCSH     | 0.8119 | 1.2930 | 1.0316 | 0.7722 | 0.9772 | 0.1197 |
| FAM71A     | 0.9620 | 1.0505 | 1.0550 | 0.8413 | 0.9772 | 0.0501 |
| LOC440338  | 0.9994 | 1.0008 | 1.0036 | 0.9050 | 0.9772 | 0.0241 |
| APOBEC3F   | 0.9118 | 1.2064 | 1.0352 | 0.7554 | 0.9772 | 0.0955 |
| OR52I2     | 0.8889 | 1.0033 | 1.1131 | 0.9035 | 0.9772 | 0.0520 |
| LOC202134  | 0.9741 | 1.0473 | 1.0010 | 0.8865 | 0.9772 | 0.0338 |
| LOC641788  | 0.8681 | 1.1269 | 1.0124 | 0.9015 | 0.9772 | 0.0587 |
| GSG1L      | 0.9460 | 0.9782 | 0.9899 | 0.9947 | 0.9772 | 0.0110 |
| LOC650341  | 0.9027 | 1.0491 | 1.0439 | 0.9133 | 0.9772 | 0.0400 |
| LOC645983  | 0.9613 | 1.0248 | 0.9711 | 0.9517 | 0.9772 | 0.0164 |
| LOC1001324 | 1.0083 | 0.9872 | 1.1336 | 0.7798 | 0.9772 | 0.0733 |
| LOC1001341 | 0.9148 | 1.1506 | 0.9616 | 0.8819 | 0.9772 | 0.0601 |
| COMP       | 0.9552 | 1.0801 | 0.9665 | 0.9071 | 0.9772 | 0.0366 |
| LOC387941  | 0.9998 | 1.1144 | 0.9744 | 0.8204 | 0.9772 | 0.0605 |
| MAGEA9B    | 0.8522 | 1.0943 | 1.0807 | 0.8818 | 0.9772 | 0.0640 |
| DYRK1A     | 0.8873 | 1.1708 | 1.1499 | 0.7011 | 0.9773 | 0.1124 |
| FABP4      | 0.9150 | 1.0966 | 0.9550 | 0.9426 | 0.9773 | 0.0406 |
| LOC646447  | 0.9022 | 1.0544 | 1.0719 | 0.8806 | 0.9773 | 0.0499 |
| OR2A2      | 0.9763 | 1.0321 | 0.9799 | 0.9208 | 0.9773 | 0.0227 |
| LOC646012  | 0.9598 | 1.1857 | 0.8922 | 0.8713 | 0.9773 | 0.0720 |
| C4orf33    | 0.9472 | 1.1262 | 1.1157 | 0.7199 | 0.9773 | 0.0951 |
| PCMTD2     | 0.8095 | 1.4396 | 0.8561 | 0.8040 | 0.9773 | 0.1545 |



|            |        |        |        |        |        |        |
|------------|--------|--------|--------|--------|--------|--------|
| LOC727759  | 0.9670 | 1.1552 | 1.0892 | 0.6977 | 0.9773 | 0.1010 |
| LOC647212  | 0.9590 | 1.0571 | 0.9741 | 0.9190 | 0.9773 | 0.0290 |
| GPHB5      | 0.9530 | 1.0880 | 1.0228 | 0.8453 | 0.9773 | 0.0519 |
| MIR382     | 0.8762 | 1.1823 | 0.9522 | 0.8985 | 0.9773 | 0.0702 |
| CPM        | 0.9152 | 1.1029 | 0.9418 | 0.9492 | 0.9773 | 0.0425 |
| LOC1001337 | 0.9886 | 0.9826 | 0.9814 | 0.9566 | 0.9773 | 0.0071 |
| PRR20C     | 0.8471 | 1.1430 | 1.0755 | 0.8436 | 0.9773 | 0.0774 |
| CYP21A2    | 0.9424 | 1.1225 | 0.9271 | 0.9172 | 0.9773 | 0.0487 |
| HDAC7      | 0.9916 | 0.9219 | 1.1267 | 0.8690 | 0.9773 | 0.0558 |
| SPON1      | 0.8096 | 1.1211 | 0.9642 | 1.0143 | 0.9773 | 0.0648 |
| PKP1       | 0.9437 | 1.0666 | 1.0433 | 0.8557 | 0.9773 | 0.0485 |
| LOC1001294 | 0.9314 | 1.1499 | 0.9625 | 0.8653 | 0.9773 | 0.0610 |
| WDR40B     | 0.9245 | 1.1056 | 0.9902 | 0.8889 | 0.9773 | 0.0476 |
| MXRA7      | 0.9611 | 1.0939 | 1.0131 | 0.8411 | 0.9773 | 0.0530 |
| LOC1001292 | 0.9223 | 1.2162 | 1.0232 | 0.7475 | 0.9773 | 0.0979 |
| KIAA0087   | 0.8978 | 1.0498 | 1.0171 | 0.9446 | 0.9773 | 0.0344 |
| TMEM25     | 0.8471 | 1.0293 | 1.2191 | 0.8137 | 0.9773 | 0.0935 |
| MIR182     | 1.0023 | 0.9933 | 1.0017 | 0.9120 | 0.9773 | 0.0219 |
| LOC647065  | 0.9337 | 1.0630 | 1.0183 | 0.8943 | 0.9773 | 0.0385 |
| LOC1001339 | 0.9635 | 1.0746 | 1.0448 | 0.8264 | 0.9773 | 0.0555 |
| KATNAL2    | 0.9482 | 1.0802 | 0.9641 | 0.9168 | 0.9773 | 0.0357 |
| LOC1001309 | 0.9490 | 1.1047 | 0.9623 | 0.8933 | 0.9773 | 0.0450 |
| LOC1001327 | 0.9008 | 1.1644 | 0.9473 | 0.8967 | 0.9773 | 0.0634 |
| LOC645649  | 0.9019 | 1.1455 | 1.0537 | 0.8083 | 0.9773 | 0.0755 |
| LOC650761  | 0.9412 | 1.1162 | 0.9463 | 0.9056 | 0.9773 | 0.0472 |
| CDH6       | 1.0017 | 0.9787 | 0.9951 | 0.9339 | 0.9773 | 0.0153 |
| LOC643534  | 0.8951 | 1.1127 | 1.0172 | 0.8844 | 0.9773 | 0.0542 |
| PRAMEF15   | 0.9315 | 1.0929 | 1.0269 | 0.8582 | 0.9774 | 0.0517 |
| LOC647371  | 0.8910 | 1.1834 | 0.9640 | 0.8711 | 0.9774 | 0.0715 |
| SIDT1      | 0.9488 | 1.0332 | 1.0355 | 0.8919 | 0.9774 | 0.0349 |
| LOC651610  | 1.1464 | 1.1058 | 0.8689 | 0.7884 | 0.9774 | 0.0878 |
| CRYBA2     | 0.8705 | 1.0325 | 1.0995 | 0.9070 | 0.9774 | 0.0535 |
| LOC653583  | 0.8813 | 1.1607 | 0.9500 | 0.9174 | 0.9774 | 0.0627 |
| ZNF419     | 1.0017 | 1.4261 | 0.8048 | 0.6769 | 0.9774 | 0.1638 |
| PRKCDBP    | 0.9194 | 1.0160 | 1.0429 | 0.9312 | 0.9774 | 0.0307 |
| LOC728905  | 0.8305 | 1.1003 | 1.0816 | 0.8971 | 0.9774 | 0.0671 |
| AIFM2      | 0.8287 | 1.1294 | 1.0289 | 0.9225 | 0.9774 | 0.0651 |
| MT1IP      | 0.8132 | 1.1260 | 1.0692 | 0.9012 | 0.9774 | 0.0726 |
| GABRA1     | 0.9215 | 1.0110 | 1.0905 | 0.8865 | 0.9774 | 0.0459 |
| LOC651731  | 1.0160 | 0.9981 | 1.0281 | 0.8672 | 0.9774 | 0.0372 |
| LOC727941  | 0.8778 | 1.0377 | 1.0439 | 0.9501 | 0.9774 | 0.0395 |
| OXT        | 0.9357 | 0.9964 | 1.0460 | 0.9315 | 0.9774 | 0.0272 |
| MAP2K5     | 0.8326 | 1.2315 | 1.0318 | 0.8137 | 0.9774 | 0.0980 |
| LOC644124  | 0.8427 | 1.0553 | 1.0686 | 0.9430 | 0.9774 | 0.0530 |
| TNIK       | 0.9497 | 1.0608 | 0.9563 | 0.9428 | 0.9774 | 0.0279 |
| LOC647651  | 0.9053 | 1.1174 | 1.0084 | 0.8785 | 0.9774 | 0.0544 |

|            |        |        |        |        |        |        |
|------------|--------|--------|--------|--------|--------|--------|
| LOC732377  | 1.0144 | 1.0959 | 0.8970 | 0.9023 | 0.9774 | 0.0479 |
| LYPD6B     | 0.9177 | 1.1596 | 0.9842 | 0.8481 | 0.9774 | 0.0668 |
| MGC16075   | 0.9418 | 0.9628 | 1.0641 | 0.9410 | 0.9774 | 0.0293 |
| GPATCH3    | 0.9041 | 1.1082 | 1.0033 | 0.8941 | 0.9774 | 0.0501 |
| LOC390354  | 0.7046 | 1.2316 | 1.3614 | 0.6120 | 0.9774 | 0.1871 |
| LOC1001326 | 0.9250 | 1.1590 | 0.9334 | 0.8923 | 0.9774 | 0.0612 |
| RPRM       | 1.0549 | 0.9985 | 0.9457 | 0.9107 | 0.9774 | 0.0315 |
| OR52N4     | 0.9277 | 1.0857 | 0.9299 | 0.9664 | 0.9774 | 0.0372 |
| CCL15      | 0.8955 | 1.0745 | 1.0042 | 0.9355 | 0.9774 | 0.0394 |
| LOC645164  | 0.9049 | 1.0378 | 1.0490 | 0.9180 | 0.9774 | 0.0383 |
| LOC646951  | 0.9634 | 0.9855 | 1.0296 | 0.9312 | 0.9774 | 0.0207 |
| CR2        | 0.8495 | 1.0370 | 1.0921 | 0.9312 | 0.9774 | 0.0542 |
| C1orf38    | 0.7793 | 1.0340 | 1.0921 | 1.0044 | 0.9774 | 0.0685 |
| OR3A3      | 0.9186 | 1.1262 | 1.0034 | 0.8617 | 0.9775 | 0.0575 |
| SLC26A10   | 0.9079 | 1.1369 | 0.9624 | 0.9027 | 0.9775 | 0.0548 |
| LOC1001325 | 0.9252 | 1.0008 | 1.0566 | 0.9272 | 0.9775 | 0.0317 |
| ZNF626     | 0.8739 | 1.0839 | 1.0287 | 0.9233 | 0.9775 | 0.0480 |
| LOC652000  | 0.9359 | 1.0263 | 1.0416 | 0.9060 | 0.9775 | 0.0333 |
| LOC441282  | 0.9775 | 1.1222 | 0.8553 | 0.9549 | 0.9775 | 0.0551 |
| LOC731377  | 0.9973 | 0.9169 | 1.0586 | 0.9370 | 0.9775 | 0.0320 |
| LOC650195  | 0.8800 | 1.0705 | 1.0731 | 0.8862 | 0.9775 | 0.0545 |
| UNC13A     | 0.9537 | 1.0091 | 1.0333 | 0.9139 | 0.9775 | 0.0270 |
| LOC1001317 | 1.0008 | 1.0326 | 0.9856 | 0.8909 | 0.9775 | 0.0305 |
| OR8G1      | 0.9648 | 0.9677 | 1.1144 | 0.8631 | 0.9775 | 0.0517 |
| SPEM1      | 0.9064 | 1.1574 | 1.0294 | 0.8169 | 0.9775 | 0.0741 |
| LOC646493  | 0.9650 | 1.0448 | 1.0053 | 0.8949 | 0.9775 | 0.0320 |
| CDYL       | 0.8512 | 1.1987 | 1.0208 | 0.8393 | 0.9775 | 0.0846 |
| AMN        | 1.0034 | 1.0167 | 1.0361 | 0.8539 | 0.9775 | 0.0417 |
| LOC1001318 | 0.9039 | 1.1026 | 0.9387 | 0.9648 | 0.9775 | 0.0435 |
| LOC387804  | 0.8954 | 1.1172 | 1.0104 | 0.8871 | 0.9775 | 0.0544 |
| LOC131909  | 0.9512 | 1.0144 | 1.0076 | 0.9368 | 0.9775 | 0.0196 |
| LOC652163  | 0.8936 | 1.0472 | 1.0806 | 0.8886 | 0.9775 | 0.0504 |
| FAM90A2P   | 0.9317 | 1.0849 | 1.0134 | 0.8802 | 0.9775 | 0.0451 |
| KLK9       | 0.9249 | 1.0766 | 1.0499 | 0.8587 | 0.9775 | 0.0516 |
| LOC390211  | 0.9465 | 1.0745 | 1.0079 | 0.8814 | 0.9775 | 0.0414 |
| HHIPL2     | 0.9658 | 1.0861 | 0.9509 | 0.9074 | 0.9775 | 0.0382 |
| LOC643792  | 0.8589 | 1.1107 | 1.0491 | 0.8915 | 0.9775 | 0.0608 |
| PCDHB9     | 0.8137 | 1.1146 | 1.0796 | 0.9022 | 0.9775 | 0.0717 |
| LOC653240  | 0.9066 | 1.1130 | 0.9922 | 0.8984 | 0.9776 | 0.0499 |
| C11orf41   | 0.9184 | 1.0554 | 1.0155 | 0.9210 | 0.9776 | 0.0344 |
| FOXA1      | 0.9008 | 1.3129 | 1.0019 | 0.6946 | 0.9776 | 0.1288 |
| LOC652150  | 0.9347 | 1.0299 | 1.0438 | 0.9019 | 0.9776 | 0.0350 |
| LOC731789  | 1.0293 | 1.1228 | 0.9834 | 0.7747 | 0.9776 | 0.0736 |
| LOC1001324 | 1.0266 | 1.0374 | 0.9035 | 0.9428 | 0.9776 | 0.0325 |
| LOC1001318 | 0.8920 | 1.0576 | 1.0887 | 0.8721 | 0.9776 | 0.0557 |
| FOLR4      | 0.9412 | 1.0742 | 0.9848 | 0.9100 | 0.9776 | 0.0357 |

|            |        |        |        |        |        |        |
|------------|--------|--------|--------|--------|--------|--------|
| PILRA      | 0.8725 | 1.1031 | 1.0618 | 0.8730 | 0.9776 | 0.0611 |
| LOC653262  | 0.9124 | 1.0777 | 0.9782 | 0.9420 | 0.9776 | 0.0360 |
| CAMK2A     | 0.8447 | 1.1465 | 0.9917 | 0.9275 | 0.9776 | 0.0638 |
| FLJ44635   | 1.0570 | 1.0223 | 0.9583 | 0.8727 | 0.9776 | 0.0405 |
| LOC644153  | 0.9387 | 1.1666 | 0.9649 | 0.8401 | 0.9776 | 0.0685 |
| SCARNA27   | 0.8466 | 1.0838 | 1.0864 | 0.8936 | 0.9776 | 0.0628 |
| LOC401233  | 0.9532 | 0.9674 | 1.0773 | 0.9125 | 0.9776 | 0.0352 |
| TRAF1      | 0.8903 | 1.1671 | 0.9751 | 0.8779 | 0.9776 | 0.0668 |
| GRIP1      | 0.9725 | 1.0532 | 0.9726 | 0.9121 | 0.9776 | 0.0290 |
| FSD2       | 0.9509 | 1.0080 | 0.9869 | 0.9647 | 0.9776 | 0.0125 |
| LOC647696  | 0.9792 | 1.0208 | 1.0075 | 0.9030 | 0.9776 | 0.0264 |
| UBXN6      | 0.8436 | 1.3281 | 1.0294 | 0.7095 | 0.9776 | 0.1340 |
| MADD       | 0.9070 | 1.2136 | 0.9937 | 0.7963 | 0.9776 | 0.0884 |
| LOC649702  | 0.9069 | 1.0725 | 1.0084 | 0.9227 | 0.9776 | 0.0387 |
| LOC1001293 | 0.8348 | 1.0540 | 1.0986 | 0.9232 | 0.9776 | 0.0605 |
| DEFB108B   | 0.8511 | 1.1782 | 1.0051 | 0.8761 | 0.9776 | 0.0749 |
| SKI        | 0.9203 | 1.2155 | 0.8005 | 0.9743 | 0.9776 | 0.0872 |
| SPATA18    | 0.8426 | 1.1958 | 1.0731 | 0.7991 | 0.9776 | 0.0944 |
| ZNF19      | 0.8761 | 1.1253 | 0.9957 | 0.9135 | 0.9777 | 0.0552 |
| LOC401805  | 0.8516 | 1.2691 | 0.9794 | 0.8106 | 0.9777 | 0.1036 |
| SNORA74B   | 0.9587 | 1.0380 | 1.0242 | 0.8897 | 0.9777 | 0.0340 |
| OR10J3     | 0.8217 | 1.1440 | 1.0599 | 0.8851 | 0.9777 | 0.0749 |
| SPINK6     | 1.0313 | 1.0061 | 0.9624 | 0.9109 | 0.9777 | 0.0264 |
| LOC1001292 | 0.9997 | 1.0143 | 1.0070 | 0.8897 | 0.9777 | 0.0295 |
| LOC1001334 | 1.0177 | 1.0189 | 0.9894 | 0.8847 | 0.9777 | 0.0317 |
| SEPHS2     | 0.9815 | 1.2078 | 1.0263 | 0.6952 | 0.9777 | 0.1061 |
| ANKRD31    | 1.0642 | 1.0178 | 0.8700 | 0.9588 | 0.9777 | 0.0419 |
| TMEM198    | 0.9258 | 1.0503 | 1.0432 | 0.8915 | 0.9777 | 0.0405 |
| LOC646046  | 0.9283 | 1.1247 | 0.9619 | 0.8959 | 0.9777 | 0.0508 |
| FLCN       | 0.9440 | 1.1747 | 0.9727 | 0.8193 | 0.9777 | 0.0736 |
| FLJ39639   | 1.0217 | 1.1253 | 0.8741 | 0.8897 | 0.9777 | 0.0593 |
| ZMAT1      | 0.9268 | 1.0241 | 0.9922 | 0.9677 | 0.9777 | 0.0205 |
| LOC729683  | 0.8210 | 0.9274 | 1.2533 | 0.9092 | 0.9777 | 0.0948 |
| LOC653321  | 0.9482 | 1.0221 | 1.1325 | 0.8081 | 0.9777 | 0.0680 |
| LOC390856  | 0.7971 | 1.0636 | 1.0935 | 0.9567 | 0.9777 | 0.0670 |
| LOC1001334 | 1.0235 | 0.9830 | 0.9977 | 0.9067 | 0.9777 | 0.0251 |
| TBC1D7     | 0.9089 | 1.2856 | 0.9912 | 0.7252 | 0.9777 | 0.1167 |
| LOC1001347 | 0.8855 | 1.0472 | 1.0940 | 0.8843 | 0.9777 | 0.0544 |
| LOC652968  | 1.0634 | 1.1907 | 0.9398 | 0.7170 | 0.9777 | 0.1009 |
| LOC648213  | 0.9802 | 0.9841 | 1.0179 | 0.9287 | 0.9777 | 0.0184 |
| HIST1H1T   | 1.0019 | 1.0626 | 0.9960 | 0.8505 | 0.9777 | 0.0450 |
| LOC643712  | 1.0493 | 1.1312 | 0.8755 | 0.8549 | 0.9777 | 0.0672 |
| RBM43      | 0.9142 | 1.0728 | 0.9934 | 0.9305 | 0.9778 | 0.0360 |
| LOC441242  | 0.8866 | 1.0452 | 1.0841 | 0.8952 | 0.9778 | 0.0508 |
| LOC642702  | 0.8338 | 1.0928 | 1.0391 | 0.9453 | 0.9778 | 0.0569 |
| LOC644873  | 0.9687 | 1.1216 | 0.9320 | 0.8889 | 0.9778 | 0.0506 |

|            |        |        |        |        |        |        |
|------------|--------|--------|--------|--------|--------|--------|
| CDH7       | 0.9165 | 1.0889 | 0.9915 | 0.9142 | 0.9778 | 0.0412 |
| LOC647677  | 1.0129 | 1.0035 | 1.0178 | 0.8768 | 0.9778 | 0.0338 |
| SLC6A20    | 0.9787 | 1.0100 | 1.0510 | 0.8714 | 0.9778 | 0.0384 |
| LOC1001290 | 0.9242 | 1.0397 | 1.0450 | 0.9021 | 0.9778 | 0.0376 |
| UBD        | 0.9427 | 1.0433 | 0.9911 | 0.9340 | 0.9778 | 0.0252 |
| OR6Y1      | 0.9864 | 1.0044 | 0.9962 | 0.9241 | 0.9778 | 0.0183 |
| LOC645176  | 0.9664 | 1.0451 | 0.9669 | 0.9328 | 0.9778 | 0.0238 |
| SNORD59A   | 0.9888 | 1.0677 | 0.9380 | 0.9167 | 0.9778 | 0.0336 |
| LOC389422  | 1.0131 | 1.0164 | 1.0225 | 0.8593 | 0.9778 | 0.0396 |
| HSP90B3P   | 0.9590 | 0.9881 | 1.0316 | 0.9324 | 0.9778 | 0.0212 |
| LOC650577  | 0.9372 | 1.1306 | 0.9450 | 0.8984 | 0.9778 | 0.0519 |
| SPANXB1    | 0.8983 | 1.0249 | 1.0668 | 0.9211 | 0.9778 | 0.0405 |
| APOBEC3C   | 0.9334 | 1.0641 | 1.0421 | 0.8716 | 0.9778 | 0.0455 |
| LOC643090  | 0.9415 | 1.0569 | 0.9894 | 0.9234 | 0.9778 | 0.0298 |
| KCNK12     | 0.9474 | 1.0071 | 1.1370 | 0.8198 | 0.9778 | 0.0659 |
| LRRK1      | 0.8829 | 1.0553 | 1.0268 | 0.9463 | 0.9778 | 0.0392 |
| POF1B      | 0.8501 | 1.0316 | 1.0933 | 0.9364 | 0.9778 | 0.0534 |
| LRAP       | 0.7161 | 1.0035 | 1.3805 | 0.8112 | 0.9778 | 0.1469 |
| LOC647169  | 0.8965 | 1.2111 | 0.9469 | 0.8568 | 0.9778 | 0.0799 |
| PF4V1      | 0.9643 | 1.1316 | 0.9951 | 0.8204 | 0.9778 | 0.0638 |
| FGFR2      | 0.8900 | 1.0465 | 1.0436 | 0.9312 | 0.9778 | 0.0397 |
| LOC650005  | 1.0440 | 1.0252 | 0.9185 | 0.9236 | 0.9778 | 0.0330 |
| PIWIL4     | 0.8846 | 1.0728 | 1.0763 | 0.8777 | 0.9778 | 0.0559 |
| EIF2C4     | 0.9739 | 1.0750 | 1.0169 | 0.8457 | 0.9778 | 0.0487 |
| SCN3B      | 0.9741 | 1.0127 | 1.0044 | 0.9203 | 0.9779 | 0.0209 |
| CCR10      | 0.9420 | 1.0719 | 1.0108 | 0.8867 | 0.9779 | 0.0403 |
| AMBN       | 0.9435 | 1.0011 | 0.9936 | 0.9733 | 0.9779 | 0.0129 |
| LOC730185  | 0.9757 | 0.9863 | 1.0887 | 0.8608 | 0.9779 | 0.0466 |
| LOC393078  | 0.9177 | 1.0222 | 1.0933 | 0.8785 | 0.9779 | 0.0490 |
| LOC642397  | 0.8991 | 1.0866 | 1.0243 | 0.9017 | 0.9779 | 0.0465 |
| CCNG2      | 0.8913 | 1.3170 | 1.0867 | 0.6166 | 0.9779 | 0.1486 |
| TRIM54     | 0.9582 | 1.0797 | 0.9890 | 0.8847 | 0.9779 | 0.0404 |
| RAB14      | 0.9702 | 1.0855 | 0.9759 | 0.8801 | 0.9779 | 0.0421 |
| LOC729296  | 0.9128 | 1.0704 | 0.9833 | 0.9451 | 0.9779 | 0.0340 |
| TCF3       | 1.0112 | 1.1076 | 0.8821 | 0.9108 | 0.9779 | 0.0513 |
| SLCO2A1    | 1.0447 | 1.0008 | 1.0015 | 0.8647 | 0.9779 | 0.0391 |
| FOXP2      | 0.9056 | 1.1266 | 1.0097 | 0.8698 | 0.9779 | 0.0578 |
| FLJ41423   | 0.9646 | 1.0495 | 0.9635 | 0.9341 | 0.9779 | 0.0249 |
| RAB9P1     | 1.0386 | 1.0088 | 0.9994 | 0.8649 | 0.9779 | 0.0386 |
| LOC1001327 | 0.8564 | 1.1185 | 1.0291 | 0.9076 | 0.9779 | 0.0592 |
| ARL13A     | 1.0075 | 1.0831 | 0.9963 | 0.8248 | 0.9779 | 0.0545 |
| LOC650853  | 0.9261 | 1.0602 | 1.0525 | 0.8730 | 0.9779 | 0.0466 |
| LOC648173  | 0.8503 | 1.0242 | 1.0222 | 1.0151 | 0.9779 | 0.0426 |
| FLJ36116   | 1.0557 | 1.0367 | 0.9902 | 0.8291 | 0.9779 | 0.0515 |
| TEPP       | 0.9122 | 1.0983 | 1.0050 | 0.8962 | 0.9779 | 0.0468 |
| GJA3       | 0.9869 | 1.0420 | 1.0075 | 0.8755 | 0.9779 | 0.0360 |

|            |        |        |        |        |        |        |
|------------|--------|--------|--------|--------|--------|--------|
| LOC649857  | 0.9365 | 1.0639 | 1.0333 | 0.8781 | 0.9779 | 0.0429 |
| LOC641948  | 0.7955 | 1.1276 | 1.1165 | 0.8722 | 0.9779 | 0.0847 |
| LOC650405  | 0.9449 | 1.0710 | 0.9971 | 0.8989 | 0.9780 | 0.0369 |
| LOC643637  | 0.9050 | 1.0711 | 1.0828 | 0.8529 | 0.9780 | 0.0582 |
| LOC138652  | 0.9704 | 0.9786 | 1.1182 | 0.8446 | 0.9780 | 0.0559 |
| OR5AY1     | 0.9494 | 1.0170 | 1.0168 | 0.9287 | 0.9780 | 0.0229 |
| MGC39606   | 0.8939 | 1.1375 | 1.0170 | 0.8635 | 0.9780 | 0.0627 |
| LOC392335  | 1.0001 | 1.0864 | 0.9670 | 0.8585 | 0.9780 | 0.0471 |
| LOC651022  | 0.9771 | 1.0733 | 0.9367 | 0.9249 | 0.9780 | 0.0337 |
| LOC1001296 | 0.9536 | 1.0638 | 0.9897 | 0.9049 | 0.9780 | 0.0335 |
| STS        | 1.0902 | 0.9399 | 0.9683 | 0.9136 | 0.9780 | 0.0390 |
| LOC652715  | 0.8983 | 1.0230 | 1.1510 | 0.8396 | 0.9780 | 0.0692 |
| LOC644655  | 0.9944 | 1.0169 | 1.0195 | 0.8812 | 0.9780 | 0.0327 |
| SPI1       | 0.9824 | 1.0568 | 0.9672 | 0.9055 | 0.9780 | 0.0311 |
| SIGLECP3   | 0.9849 | 1.0120 | 1.0123 | 0.9027 | 0.9780 | 0.0259 |
| TTY14      | 0.8730 | 1.0677 | 1.0311 | 0.9402 | 0.9780 | 0.0441 |
| EFHB       | 0.9459 | 1.0345 | 1.0332 | 0.8984 | 0.9780 | 0.0337 |
| TM9SF2     | 0.7538 | 1.1767 | 1.2623 | 0.7192 | 0.9780 | 0.1407 |
| CLRN3      | 0.8874 | 1.1495 | 1.0566 | 0.8185 | 0.9780 | 0.0759 |
| LOC391429  | 0.8589 | 0.9230 | 1.1434 | 0.9867 | 0.9780 | 0.0610 |
| TCL1B      | 0.9320 | 1.0427 | 0.9769 | 0.9604 | 0.9780 | 0.0235 |
| LOC648552  | 0.9444 | 1.0141 | 1.0536 | 0.9000 | 0.9780 | 0.0345 |
| STOM       | 0.9088 | 1.2096 | 0.9393 | 0.8544 | 0.9780 | 0.0792 |
| HAUS6      | 0.9122 | 1.0748 | 1.0591 | 0.8660 | 0.9780 | 0.0523 |
| LOC1001290 | 0.9585 | 1.0382 | 0.9850 | 0.9303 | 0.9780 | 0.0230 |
| LOC644171  | 0.9966 | 0.9512 | 0.9460 | 1.0183 | 0.9780 | 0.0176 |
| LOC441617  | 1.0314 | 0.8818 | 1.0496 | 0.9492 | 0.9780 | 0.0388 |
| EDARADD    | 0.9928 | 0.9985 | 0.9918 | 0.9290 | 0.9780 | 0.0164 |
| LOC1001284 | 0.9742 | 1.0816 | 0.9774 | 0.8789 | 0.9780 | 0.0414 |
| TRIM34     | 0.8989 | 1.0745 | 1.0217 | 0.9171 | 0.9780 | 0.0420 |
| MIR1269    | 0.9833 | 1.0788 | 0.9946 | 0.8554 | 0.9780 | 0.0461 |
| LOC1001290 | 0.8976 | 1.0495 | 1.0693 | 0.8957 | 0.9780 | 0.0472 |
| LOC644265  | 0.8557 | 1.2004 | 1.0473 | 0.8088 | 0.9780 | 0.0903 |
| GLYAT      | 0.9212 | 1.0973 | 1.0111 | 0.8826 | 0.9781 | 0.0480 |
| MIR1205    | 0.8831 | 1.0720 | 1.0191 | 0.9380 | 0.9781 | 0.0420 |
| LOC391169  | 0.9273 | 1.0397 | 0.9829 | 0.9622 | 0.9781 | 0.0235 |
| AK5        | 0.9030 | 1.1265 | 0.9506 | 0.9322 | 0.9781 | 0.0505 |
| PGAM2      | 0.9811 | 0.9583 | 1.0151 | 0.9577 | 0.9781 | 0.0135 |
| EPB42      | 0.9659 | 1.0925 | 0.8969 | 0.9570 | 0.9781 | 0.0411 |
| LOC1001313 | 0.9286 | 0.9640 | 1.1106 | 0.9091 | 0.9781 | 0.0456 |
| LOC1001326 | 0.9809 | 0.9914 | 1.0869 | 0.8530 | 0.9781 | 0.0480 |
| LOC283332  | 0.8415 | 1.1129 | 1.0619 | 0.8960 | 0.9781 | 0.0649 |
| TEX13A     | 0.9896 | 1.0369 | 0.9677 | 0.9181 | 0.9781 | 0.0247 |
| LOC731511  | 0.9675 | 0.9406 | 1.0427 | 0.9615 | 0.9781 | 0.0223 |
| LOC648863  | 0.9548 | 1.1446 | 0.9453 | 0.8676 | 0.9781 | 0.0588 |
| FAM98C     | 0.9586 | 1.3120 | 0.9136 | 0.7281 | 0.9781 | 0.1220 |

|            |        |        |        |        |        |        |
|------------|--------|--------|--------|--------|--------|--------|
| ASNA1      | 0.8581 | 1.1135 | 0.8677 | 1.0730 | 0.9781 | 0.0670 |
| BCL2L11    | 0.9621 | 0.9849 | 1.0494 | 0.9160 | 0.9781 | 0.0277 |
| PPFIA4     | 0.9788 | 1.1126 | 0.9524 | 0.8686 | 0.9781 | 0.0506 |
| TAS2R8     | 0.9756 | 0.9694 | 1.0816 | 0.8859 | 0.9781 | 0.0401 |
| LOC650436  | 0.9204 | 1.0260 | 1.0268 | 0.9391 | 0.9781 | 0.0282 |
| LOC649596  | 0.8765 | 1.1735 | 0.9761 | 0.8864 | 0.9781 | 0.0689 |
| PCTK3      | 0.9011 | 1.1102 | 0.9853 | 0.9159 | 0.9781 | 0.0477 |
| LOC641515  | 1.0263 | 1.0175 | 0.9542 | 0.9145 | 0.9781 | 0.0266 |
| LOC728362  | 0.9781 | 1.0270 | 1.0442 | 0.8633 | 0.9781 | 0.0408 |
| CTAGE4     | 0.9215 | 1.0188 | 1.0223 | 0.9499 | 0.9781 | 0.0252 |
| LOC650846  | 0.8733 | 1.0818 | 1.0992 | 0.8582 | 0.9781 | 0.0650 |
| CST5       | 0.9156 | 1.0774 | 1.0100 | 0.9096 | 0.9781 | 0.0403 |
| C21orf88   | 0.9311 | 1.0865 | 1.0062 | 0.8887 | 0.9781 | 0.0435 |
| PLEK       | 0.9037 | 1.1097 | 0.9425 | 0.9566 | 0.9781 | 0.0453 |
| EVX1       | 0.9480 | 0.9884 | 1.0274 | 0.9488 | 0.9781 | 0.0190 |
| LOC649527  | 0.9481 | 1.0250 | 0.9365 | 1.0029 | 0.9781 | 0.0213 |
| KCTD14     | 0.9587 | 1.0809 | 0.9518 | 0.9213 | 0.9781 | 0.0352 |
| C3orf27    | 0.9941 | 0.9954 | 0.9902 | 0.9329 | 0.9781 | 0.0151 |
| SCAND2     | 0.9641 | 1.1123 | 0.9649 | 0.8713 | 0.9782 | 0.0498 |
| RFX4       | 0.9371 | 1.0800 | 0.9927 | 0.9029 | 0.9782 | 0.0387 |
| LOC653650  | 0.9734 | 1.0771 | 0.9761 | 0.8861 | 0.9782 | 0.0390 |
| CPXCR1     | 0.9637 | 1.0105 | 1.0187 | 0.9197 | 0.9782 | 0.0229 |
| EFCBP1     | 0.9120 | 1.0739 | 0.9184 | 1.0083 | 0.9782 | 0.0388 |
| GRHL1      | 0.9194 | 1.0876 | 1.0062 | 0.8994 | 0.9782 | 0.0432 |
| BMS1       | 0.7187 | 1.4862 | 0.9432 | 0.7646 | 0.9782 | 0.1761 |
| C16orf73   | 0.9439 | 1.0220 | 1.0272 | 0.9196 | 0.9782 | 0.0273 |
| RGS11      | 0.9113 | 1.0421 | 1.0012 | 0.9581 | 0.9782 | 0.0281 |
| PLEKHG1    | 1.0046 | 1.0430 | 0.9957 | 0.8694 | 0.9782 | 0.0377 |
| LOC402116  | 0.9393 | 1.0626 | 0.9827 | 0.9282 | 0.9782 | 0.0305 |
| CES3       | 0.9870 | 1.0692 | 0.9209 | 0.9356 | 0.9782 | 0.0335 |
| LRRC66     | 0.9011 | 1.0872 | 1.0684 | 0.8560 | 0.9782 | 0.0584 |
| MMP25      | 0.9046 | 1.1919 | 0.9082 | 0.9081 | 0.9782 | 0.0712 |
| ERCC-00016 | 0.9684 | 1.1115 | 0.9448 | 0.8880 | 0.9782 | 0.0475 |
| BCAR1      | 1.0312 | 1.1612 | 0.9010 | 0.8194 | 0.9782 | 0.0750 |
| SMARCA1    | 1.0166 | 1.0269 | 1.0407 | 0.8286 | 0.9782 | 0.0501 |
| TTC33      | 0.9287 | 1.0951 | 1.0973 | 0.7916 | 0.9782 | 0.0737 |
| LOC150185  | 0.8362 | 1.1802 | 0.9747 | 0.9218 | 0.9782 | 0.0731 |
| MRAP2      | 0.9365 | 1.0851 | 0.9357 | 0.9555 | 0.9782 | 0.0359 |
| LOC727894  | 0.8602 | 1.1235 | 1.0265 | 0.9027 | 0.9782 | 0.0599 |
| CHI3L2     | 0.9655 | 1.0035 | 1.0485 | 0.8953 | 0.9782 | 0.0324 |
| DNHD1      | 1.0559 | 1.0418 | 1.0123 | 0.8029 | 0.9782 | 0.0591 |
| SHISA5     | 0.8798 | 1.2093 | 1.0952 | 0.7287 | 0.9782 | 0.1076 |
| LOC1001286 | 0.9177 | 1.0741 | 1.0133 | 0.9079 | 0.9782 | 0.0398 |
| OCM        | 0.8437 | 1.1162 | 1.0320 | 0.9211 | 0.9782 | 0.0601 |
| CCDC24     | 0.8432 | 1.4854 | 0.8622 | 0.7222 | 0.9782 | 0.1719 |
| LOC1001291 | 1.0398 | 1.0511 | 0.9692 | 0.8529 | 0.9783 | 0.0455 |

|            |        |        |        |        |        |        |
|------------|--------|--------|--------|--------|--------|--------|
| LOC646473  | 0.9740 | 1.0119 | 1.0480 | 0.8792 | 0.9783 | 0.0363 |
| BMP8A      | 1.0074 | 1.0154 | 1.0187 | 0.8716 | 0.9783 | 0.0356 |
| LOC730066  | 0.8222 | 1.1575 | 1.0458 | 0.8875 | 0.9783 | 0.0760 |
| LOC646906  | 0.9446 | 0.9941 | 1.0610 | 0.9134 | 0.9783 | 0.0322 |
| LOC1001334 | 0.8405 | 1.1218 | 1.0654 | 0.8854 | 0.9783 | 0.0682 |
| LOC732455  | 1.0487 | 0.9614 | 1.0304 | 0.8726 | 0.9783 | 0.0399 |
| TIE1       | 0.8358 | 1.1336 | 1.0659 | 0.8779 | 0.9783 | 0.0720 |
| LOC1001301 | 0.9151 | 1.0883 | 0.9862 | 0.9235 | 0.9783 | 0.0400 |
| ERCC-00168 | 1.1111 | 1.0130 | 0.9381 | 0.8509 | 0.9783 | 0.0553 |
| C21orf62   | 0.8431 | 1.1216 | 0.9522 | 0.9963 | 0.9783 | 0.0576 |
| LOC1001331 | 0.8762 | 1.0291 | 1.0412 | 0.9667 | 0.9783 | 0.0377 |
| MIR132     | 1.0078 | 0.9881 | 1.0131 | 0.9042 | 0.9783 | 0.0253 |
| ZNF23      | 0.9082 | 1.1427 | 1.0671 | 0.7952 | 0.9783 | 0.0782 |
| LOC440918  | 0.8182 | 1.0851 | 1.1219 | 0.8880 | 0.9783 | 0.0741 |
| COMMD9     | 0.9594 | 1.1700 | 1.0918 | 0.6922 | 0.9783 | 0.1048 |
| SRD5A2     | 0.9372 | 1.1454 | 0.9000 | 0.9306 | 0.9783 | 0.0563 |
| FCRL3      | 0.8850 | 1.0630 | 1.0422 | 0.9230 | 0.9783 | 0.0438 |
| KCNG3      | 1.0255 | 1.1275 | 0.9676 | 0.7926 | 0.9783 | 0.0702 |
| LOC650943  | 0.8738 | 1.1410 | 0.9999 | 0.8985 | 0.9783 | 0.0607 |
| HISPPD1    | 0.9207 | 1.0033 | 1.1220 | 0.8672 | 0.9783 | 0.0555 |
| MIR487A    | 0.9283 | 1.0293 | 1.0066 | 0.9491 | 0.9783 | 0.0237 |
| ZBTB26     | 0.8582 | 1.1302 | 1.0237 | 0.9011 | 0.9783 | 0.0616 |
| TCN2       | 0.7956 | 1.1255 | 1.1078 | 0.8844 | 0.9783 | 0.0820 |
| SNORD7     | 0.8712 | 1.0454 | 1.0883 | 0.9084 | 0.9783 | 0.0524 |
| FGF2       | 0.9303 | 1.0880 | 1.0107 | 0.8843 | 0.9783 | 0.0449 |
| LOC143678  | 0.9787 | 1.1447 | 0.9471 | 0.8428 | 0.9783 | 0.0626 |
| LOC442147  | 0.8923 | 1.1365 | 0.9986 | 0.8860 | 0.9783 | 0.0587 |
| CNRIP1     | 0.8740 | 1.0762 | 1.0109 | 0.9523 | 0.9783 | 0.0430 |
| LOC647955  | 0.9437 | 1.0911 | 0.9608 | 0.9178 | 0.9783 | 0.0386 |
| OR1J1      | 0.8989 | 1.1168 | 1.0421 | 0.8556 | 0.9783 | 0.0610 |
| LOC1001300 | 0.9332 | 1.0452 | 1.0781 | 0.8568 | 0.9783 | 0.0510 |
| AMHR2      | 0.9553 | 1.2020 | 1.0253 | 0.7308 | 0.9783 | 0.0975 |
| C1orf167   | 0.9409 | 1.1318 | 0.9417 | 0.8990 | 0.9783 | 0.0521 |
| SLC17A2    | 0.8776 | 1.0594 | 1.0359 | 0.9405 | 0.9784 | 0.0423 |
| CDH29      | 0.8420 | 1.3526 | 0.8863 | 0.8326 | 0.9784 | 0.1253 |
| LOC651834  | 0.9410 | 0.8720 | 1.0206 | 1.0799 | 0.9784 | 0.0455 |
| ANKS4B     | 1.0050 | 0.9221 | 1.0073 | 0.9791 | 0.9784 | 0.0198 |
| LOC399753  | 0.9616 | 1.0389 | 1.0227 | 0.8903 | 0.9784 | 0.0338 |
| C10orf128  | 0.9413 | 1.0167 | 1.0686 | 0.8869 | 0.9784 | 0.0402 |
| MAST1      | 0.9925 | 1.2169 | 0.9213 | 0.7828 | 0.9784 | 0.0906 |
| LOC148137  | 0.9110 | 1.1139 | 0.9850 | 0.9036 | 0.9784 | 0.0488 |
| C7orf64    | 0.9487 | 0.9868 | 1.0841 | 0.8940 | 0.9784 | 0.0400 |
| TRIM43     | 0.9279 | 1.0474 | 1.0924 | 0.8459 | 0.9784 | 0.0562 |
| ACAD11     | 0.8682 | 1.2338 | 1.0389 | 0.7727 | 0.9784 | 0.1014 |
| LOC644525  | 0.7938 | 1.2492 | 1.0114 | 0.8592 | 0.9784 | 0.1011 |
| C8orf71    | 0.9371 | 1.0124 | 1.0651 | 0.8990 | 0.9784 | 0.0373 |

|            |        |        |        |        |        |        |
|------------|--------|--------|--------|--------|--------|--------|
| SPANXN2    | 1.0107 | 1.0311 | 1.0589 | 0.8129 | 0.9784 | 0.0560 |
| WISP3      | 0.8913 | 1.0689 | 1.0306 | 0.9228 | 0.9784 | 0.0424 |
| ZNF620     | 0.8651 | 0.9910 | 1.0430 | 1.0146 | 0.9784 | 0.0392 |
| SFXN2      | 0.9508 | 1.1509 | 0.9864 | 0.8256 | 0.9784 | 0.0670 |
| TREX1      | 0.9840 | 1.0802 | 0.9486 | 0.9009 | 0.9784 | 0.0379 |
| CFHR5      | 0.8521 | 1.2064 | 0.9273 | 0.9280 | 0.9784 | 0.0781 |
| LOC1001299 | 0.9334 | 1.1676 | 0.9296 | 0.8832 | 0.9784 | 0.0641 |
| MAGEB6B    | 0.9724 | 1.1017 | 0.9469 | 0.8927 | 0.9784 | 0.0443 |
| C14orf23   | 0.9978 | 1.0358 | 0.9672 | 0.9129 | 0.9784 | 0.0260 |
| GFRA1      | 0.9220 | 1.0843 | 1.0025 | 0.9049 | 0.9784 | 0.0412 |
| QKI        | 0.8493 | 1.1761 | 1.0004 | 0.8880 | 0.9784 | 0.0733 |
| LOC642248  | 0.9111 | 1.0997 | 1.0304 | 0.8726 | 0.9784 | 0.0526 |
| LOC729338  | 0.9996 | 1.1775 | 0.8330 | 0.9036 | 0.9784 | 0.0746 |
| HOXD1      | 0.9940 | 0.9592 | 0.9604 | 1.0003 | 0.9784 | 0.0109 |
| PCSK4      | 0.9065 | 1.0131 | 1.1147 | 0.8795 | 0.9784 | 0.0538 |
| LOC255326  | 0.9267 | 1.1451 | 0.9310 | 0.9109 | 0.9785 | 0.0557 |
| OCA2       | 0.9136 | 1.0876 | 0.9986 | 0.9141 | 0.9785 | 0.0415 |
| LOC116437  | 0.9054 | 1.0749 | 1.0196 | 0.9140 | 0.9785 | 0.0413 |
| LOC1001312 | 0.8440 | 1.1106 | 1.1413 | 0.8181 | 0.9785 | 0.0855 |
| CTSG       | 0.8468 | 1.0512 | 1.0765 | 0.9394 | 0.9785 | 0.0530 |
| LOC645956  | 0.8371 | 1.1713 | 0.9582 | 0.9474 | 0.9785 | 0.0698 |
| LOC642775  | 0.9612 | 0.9487 | 1.0428 | 0.9613 | 0.9785 | 0.0217 |
| ACTL6B     | 0.8367 | 1.1540 | 0.9142 | 1.0091 | 0.9785 | 0.0683 |
| PCSK6      | 0.9498 | 1.0898 | 1.0131 | 0.8615 | 0.9785 | 0.0484 |
| PRICKLE1   | 1.0010 | 0.9995 | 0.9887 | 0.9250 | 0.9785 | 0.0181 |
| LOC730234  | 1.0033 | 1.0573 | 0.9056 | 0.9479 | 0.9785 | 0.0330 |
| LOC1001294 | 0.9041 | 1.1447 | 0.9573 | 0.9081 | 0.9785 | 0.0567 |
| KREMEN1    | 0.8949 | 1.1310 | 0.9945 | 0.8938 | 0.9785 | 0.0560 |
| LOC654203  | 0.9318 | 1.0435 | 0.9963 | 0.9426 | 0.9785 | 0.0258 |
| LOC1001291 | 0.9345 | 0.9904 | 1.0364 | 0.9528 | 0.9785 | 0.0225 |
| LOC401286  | 0.9357 | 1.0662 | 1.0131 | 0.8991 | 0.9785 | 0.0377 |
| ZNF713     | 0.8978 | 1.1917 | 1.0302 | 0.7945 | 0.9785 | 0.0859 |
| LOC654000  | 0.9236 | 1.1539 | 0.9747 | 0.8619 | 0.9785 | 0.0628 |
| LOXL2      | 0.9498 | 1.0880 | 0.9346 | 0.9418 | 0.9785 | 0.0366 |
| ALDOB      | 0.8236 | 1.2262 | 1.0105 | 0.8539 | 0.9785 | 0.0921 |
| LOC647264  | 0.8854 | 1.0531 | 1.0051 | 0.9706 | 0.9785 | 0.0354 |
| SYTL1      | 1.0572 | 1.1105 | 0.8845 | 0.8621 | 0.9786 | 0.0619 |
| LOC729566  | 1.0185 | 1.0310 | 0.9468 | 0.9179 | 0.9786 | 0.0275 |
| LOC652784  | 0.9275 | 1.0223 | 1.0727 | 0.8917 | 0.9786 | 0.0418 |
| MIR1302-7  | 0.9638 | 1.0834 | 0.9562 | 0.9107 | 0.9786 | 0.0369 |
| LOC1001297 | 1.0000 | 0.9764 | 1.0508 | 0.8870 | 0.9786 | 0.0342 |
| MGC13005   | 0.8904 | 1.0508 | 1.0415 | 0.9315 | 0.9786 | 0.0400 |
| LRRN4CL    | 0.9105 | 1.0425 | 0.9927 | 0.9685 | 0.9786 | 0.0274 |
| KRTAP10-10 | 0.8894 | 1.1114 | 1.0029 | 0.9105 | 0.9786 | 0.0507 |
| LOC400011  | 0.9468 | 1.0464 | 1.0571 | 0.8641 | 0.9786 | 0.0455 |
| LOC392232  | 1.0156 | 0.9975 | 0.9981 | 0.9032 | 0.9786 | 0.0255 |



|            |        |        |        |        |        |        |
|------------|--------|--------|--------|--------|--------|--------|
| LOC1001289 | 0.9263 | 1.0693 | 1.0218 | 0.8970 | 0.9786 | 0.0403 |
| LOC642006  | 0.9386 | 1.0356 | 0.9965 | 0.9438 | 0.9786 | 0.0231 |
| PROC       | 1.0208 | 1.0212 | 0.8853 | 0.9871 | 0.9786 | 0.0321 |
| SEMA7A     | 0.9541 | 1.0608 | 1.0316 | 0.8680 | 0.9786 | 0.0432 |
| PLCL2      | 0.8852 | 1.1969 | 1.0357 | 0.7967 | 0.9786 | 0.0879 |
| MBL2       | 0.9432 | 1.0628 | 0.9447 | 0.9638 | 0.9786 | 0.0285 |
| TMCC2      | 0.8644 | 1.0683 | 1.0108 | 0.9711 | 0.9786 | 0.0430 |
| TNFSF12    | 0.9098 | 1.0942 | 0.9513 | 0.9592 | 0.9786 | 0.0400 |
| PDE6A      | 0.8670 | 1.1005 | 1.0474 | 0.8997 | 0.9786 | 0.0565 |
| FBLIM1     | 0.9633 | 1.0146 | 1.0074 | 0.9293 | 0.9786 | 0.0200 |
| LOC654222  | 0.9231 | 1.0515 | 1.1165 | 0.8234 | 0.9786 | 0.0655 |
| LOC652523  | 0.9057 | 0.9829 | 1.0462 | 0.9798 | 0.9786 | 0.0287 |
| LOC644554  | 0.9049 | 1.1359 | 1.0466 | 0.8271 | 0.9786 | 0.0694 |
| LOC727796  | 0.8467 | 1.1421 | 1.0308 | 0.8950 | 0.9786 | 0.0670 |
| LOC642263  | 0.9415 | 1.0753 | 1.0559 | 0.8418 | 0.9787 | 0.0543 |
| C6orf165   | 0.8717 | 1.0854 | 0.9971 | 0.9605 | 0.9787 | 0.0443 |
| MYO1A      | 0.8900 | 1.0957 | 1.0327 | 0.8963 | 0.9787 | 0.0510 |
| LOC399988  | 0.8980 | 1.3255 | 0.9899 | 0.7012 | 0.9787 | 0.1304 |
| LOC729289  | 0.8743 | 1.0801 | 0.9833 | 0.9770 | 0.9787 | 0.0420 |
| LOC730079  | 0.8147 | 1.1524 | 1.0032 | 0.9443 | 0.9787 | 0.0700 |
| BEND2      | 0.9808 | 1.1233 | 0.9470 | 0.8636 | 0.9787 | 0.0541 |
| FLJ46210   | 0.9051 | 1.1074 | 0.9931 | 0.9090 | 0.9787 | 0.0475 |
| MIR643     | 0.9333 | 1.1204 | 0.9327 | 0.9283 | 0.9787 | 0.0473 |
| APAF1      | 0.7953 | 1.2163 | 1.0055 | 0.8976 | 0.9787 | 0.0901 |
| RBMS1      | 0.9397 | 1.0449 | 0.9888 | 0.9413 | 0.9787 | 0.0248 |
| LOC649417  | 0.9340 | 1.0865 | 0.9413 | 0.9530 | 0.9787 | 0.0361 |
| LOC645390  | 0.9815 | 1.0132 | 1.0200 | 0.9002 | 0.9787 | 0.0275 |
| LOC283481  | 0.8697 | 0.9826 | 1.1020 | 0.9604 | 0.9787 | 0.0478 |
| LOC728369  | 0.9651 | 1.0749 | 0.9480 | 0.9269 | 0.9787 | 0.0330 |
| LOC401431  | 0.8499 | 1.3348 | 0.8612 | 0.8689 | 0.9787 | 0.1188 |
| LOC1001327 | 0.8250 | 0.9311 | 1.2305 | 0.9282 | 0.9787 | 0.0875 |
| GJB6       | 0.9820 | 1.0220 | 1.0222 | 0.8886 | 0.9787 | 0.0315 |
| LPPR4      | 0.9692 | 1.0399 | 0.9864 | 0.9194 | 0.9787 | 0.0249 |
| C1orf114   | 0.9249 | 1.0251 | 0.9958 | 0.9691 | 0.9787 | 0.0213 |
| LOC222967  | 0.9100 | 1.0627 | 1.0439 | 0.8983 | 0.9787 | 0.0433 |
| LOC1001334 | 0.9831 | 1.0050 | 1.0092 | 0.9175 | 0.9787 | 0.0212 |
| SNAI3      | 0.9075 | 1.0339 | 1.0951 | 0.8784 | 0.9787 | 0.0514 |
| LOC1001294 | 0.9056 | 1.0020 | 1.0526 | 0.9547 | 0.9787 | 0.0315 |
| LOC644973  | 0.9240 | 1.2652 | 0.8909 | 0.8348 | 0.9787 | 0.0973 |
| HIST1H2AJ  | 0.9658 | 1.0949 | 1.0407 | 0.8135 | 0.9787 | 0.0611 |
| LOC646331  | 1.0235 | 1.0428 | 0.8730 | 0.9757 | 0.9787 | 0.0380 |
| LOC647661  | 0.8904 | 1.1359 | 1.0171 | 0.8715 | 0.9787 | 0.0615 |
| HOXA11AS   | 0.9330 | 1.0745 | 0.9662 | 0.9412 | 0.9787 | 0.0327 |
| LOC729008  | 0.8811 | 1.2258 | 0.9034 | 0.9048 | 0.9787 | 0.0825 |
| LOC649979  | 0.9456 | 1.0813 | 1.0069 | 0.8812 | 0.9787 | 0.0427 |
| PHF7       | 0.9702 | 1.0921 | 0.9801 | 0.8726 | 0.9787 | 0.0449 |

|            |        |        |        |        |        |        |
|------------|--------|--------|--------|--------|--------|--------|
| MYO15A     | 0.9632 | 1.1147 | 0.9080 | 0.9291 | 0.9788 | 0.0467 |
| LOC729497  | 0.9496 | 1.0746 | 1.0208 | 0.8700 | 0.9788 | 0.0444 |
| SERPINA6   | 0.8710 | 1.0658 | 1.0079 | 0.9704 | 0.9788 | 0.0409 |
| LOC646036  | 0.9442 | 1.0671 | 0.9210 | 0.9828 | 0.9788 | 0.0321 |
| LOC647570  | 0.9476 | 1.0150 | 1.0948 | 0.8577 | 0.9788 | 0.0503 |
| SLAMF6     | 0.9638 | 1.0724 | 0.9145 | 0.9645 | 0.9788 | 0.0333 |
| GOLGA1     | 1.0238 | 1.1367 | 1.0227 | 0.7320 | 0.9788 | 0.0865 |
| LOC646503  | 0.9776 | 0.9046 | 1.1392 | 0.8939 | 0.9788 | 0.0566 |
| LOC642350  | 0.9805 | 0.9757 | 1.0186 | 0.9404 | 0.9788 | 0.0160 |
| LOC1001313 | 0.9101 | 1.1603 | 0.9634 | 0.8814 | 0.9788 | 0.0628 |
| SPEF2      | 0.9627 | 1.1083 | 0.9471 | 0.8971 | 0.9788 | 0.0454 |
| LOC644021  | 1.0120 | 0.9923 | 1.0301 | 0.8808 | 0.9788 | 0.0336 |
| LOC1001309 | 0.9509 | 1.0109 | 1.0149 | 0.9385 | 0.9788 | 0.0199 |
| LOC653564  | 0.8394 | 1.0281 | 1.0888 | 0.9590 | 0.9788 | 0.0535 |
| ADAM21P    | 0.9846 | 1.0608 | 1.0173 | 0.8526 | 0.9788 | 0.0449 |
| LOC646946  | 0.9483 | 1.0858 | 0.9597 | 0.9216 | 0.9788 | 0.0365 |
| ESM1       | 0.8704 | 1.1729 | 0.9483 | 0.9237 | 0.9788 | 0.0667 |
| OR7A10     | 0.9411 | 1.0914 | 0.9968 | 0.8861 | 0.9788 | 0.0438 |
| PRO1768    | 0.9178 | 1.0171 | 1.1027 | 0.8778 | 0.9789 | 0.0506 |
| LOC155100  | 0.9370 | 1.0614 | 1.0112 | 0.9059 | 0.9789 | 0.0353 |
| LOC731438  | 0.9277 | 1.0916 | 0.9772 | 0.9190 | 0.9789 | 0.0397 |
| PLXNC1     | 0.9259 | 1.1809 | 1.0317 | 0.7770 | 0.9789 | 0.0852 |
| GFI1       | 0.9376 | 1.1697 | 0.8835 | 0.9247 | 0.9789 | 0.0646 |
| ZBTB45     | 0.8802 | 1.3138 | 0.9068 | 0.8146 | 0.9789 | 0.1133 |
| JAK3       | 0.9164 | 1.0500 | 1.0205 | 0.9286 | 0.9789 | 0.0332 |
| SNORD113-8 | 0.9528 | 1.0532 | 0.9772 | 0.9323 | 0.9789 | 0.0264 |
| LOC644725  | 0.9619 | 1.1484 | 1.0121 | 0.7932 | 0.9789 | 0.0734 |
| SNORD4B    | 0.9771 | 1.1073 | 0.9543 | 0.8768 | 0.9789 | 0.0479 |
| PIGR       | 0.9430 | 1.1058 | 0.9824 | 0.8843 | 0.9789 | 0.0469 |
| PSG6       | 0.9226 | 1.0747 | 0.9906 | 0.9276 | 0.9789 | 0.0355 |
| LOC1001284 | 0.9697 | 1.0914 | 0.9861 | 0.8684 | 0.9789 | 0.0457 |
| RNF139     | 0.8245 | 1.1355 | 1.0148 | 0.9408 | 0.9789 | 0.0652 |
| LOC1001302 | 0.9677 | 1.1948 | 0.9302 | 0.8229 | 0.9789 | 0.0782 |
| TGFB11I    | 0.9397 | 1.0185 | 1.0625 | 0.8949 | 0.9789 | 0.0378 |
| GRIN2A     | 0.8022 | 1.1713 | 0.9993 | 0.9429 | 0.9789 | 0.0764 |
| MYO18A     | 0.9187 | 1.0798 | 1.0659 | 0.8512 | 0.9789 | 0.0560 |
| VSNL1      | 0.9436 | 1.0874 | 1.0218 | 0.8628 | 0.9789 | 0.0486 |
| PPT2       | 0.9192 | 1.1535 | 0.9764 | 0.8666 | 0.9789 | 0.0624 |
| FLJ42953   | 0.8991 | 1.0156 | 0.9949 | 1.0060 | 0.9789 | 0.0269 |
| TSPY3      | 0.9312 | 1.0612 | 0.9571 | 0.9663 | 0.9789 | 0.0284 |
| LOC729704  | 0.9468 | 1.0590 | 0.9919 | 0.9180 | 0.9789 | 0.0307 |
| FLG2       | 0.9017 | 0.9555 | 1.1058 | 0.9527 | 0.9789 | 0.0441 |
| WHDC1L1    | 0.8846 | 1.0239 | 1.0961 | 0.9111 | 0.9789 | 0.0494 |
| LOC441582  | 0.8767 | 1.1111 | 1.0837 | 0.8443 | 0.9789 | 0.0689 |
| LOC442606  | 0.9101 | 1.0424 | 1.0028 | 0.9605 | 0.9789 | 0.0284 |
| LOC1001302 | 0.8850 | 1.0785 | 0.9883 | 0.9640 | 0.9789 | 0.0398 |

|            |        |        |        |        |        |        |
|------------|--------|--------|--------|--------|--------|--------|
| ATP2A3     | 0.9338 | 1.0891 | 0.9356 | 0.9573 | 0.9789 | 0.0371 |
| C3orf25    | 0.9112 | 1.1735 | 0.9216 | 0.9095 | 0.9790 | 0.0649 |
| MIR411     | 0.9130 | 1.0362 | 1.0765 | 0.8902 | 0.9790 | 0.0457 |
| LOC1001346 | 0.9930 | 0.9958 | 1.0637 | 0.8633 | 0.9790 | 0.0419 |
| LOC645038  | 0.8695 | 1.0886 | 1.0324 | 0.9254 | 0.9790 | 0.0498 |
| TMEM194B   | 1.0058 | 1.0200 | 1.0370 | 0.8530 | 0.9790 | 0.0425 |
| LOC260340  | 0.9384 | 1.1081 | 1.0239 | 0.8455 | 0.9790 | 0.0564 |
| SDC3       | 0.9140 | 1.0924 | 0.9937 | 0.9158 | 0.9790 | 0.0421 |
| LOC648432  | 0.9035 | 1.1120 | 1.0698 | 0.8306 | 0.9790 | 0.0669 |
| HSP90AB4P  | 0.9636 | 1.0293 | 1.0560 | 0.8670 | 0.9790 | 0.0421 |
| LOC1001336 | 1.0079 | 1.1260 | 0.9165 | 0.8655 | 0.9790 | 0.0572 |
| LOC651128  | 0.8727 | 1.1051 | 1.0533 | 0.8848 | 0.9790 | 0.0589 |
| MMP26      | 0.8816 | 1.0463 | 1.0343 | 0.9538 | 0.9790 | 0.0384 |
| LOC1001312 | 0.9379 | 1.0870 | 0.9615 | 0.9295 | 0.9790 | 0.0366 |
| LOC1001319 | 0.9240 | 1.1414 | 0.9545 | 0.8962 | 0.9790 | 0.0554 |
| ZNF140     | 0.9830 | 1.1100 | 1.0245 | 0.7985 | 0.9790 | 0.0657 |
| KIFC3      | 1.0292 | 0.9716 | 1.1123 | 0.8030 | 0.9790 | 0.0654 |
| GTF3C1     | 0.8206 | 1.3098 | 0.8344 | 0.9513 | 0.9790 | 0.1141 |
| LOC729973  | 0.9104 | 1.0980 | 1.0669 | 0.8408 | 0.9790 | 0.0617 |
| EHMT1      | 0.9317 | 1.1166 | 0.9799 | 0.8879 | 0.9790 | 0.0496 |
| LOC727755  | 0.8824 | 1.1958 | 0.8913 | 0.9466 | 0.9790 | 0.0736 |
| MIR424     | 1.0313 | 1.0117 | 0.9892 | 0.8838 | 0.9790 | 0.0329 |
| KRT8P15    | 0.9231 | 1.0203 | 1.0624 | 0.9103 | 0.9790 | 0.0371 |
| C20orf195  | 0.9461 | 0.9752 | 1.0047 | 0.9902 | 0.9790 | 0.0125 |
| LOC1001329 | 0.8909 | 1.0853 | 1.0631 | 0.8768 | 0.9790 | 0.0552 |
| MEIG1      | 0.9622 | 1.0344 | 1.0235 | 0.8961 | 0.9790 | 0.0319 |
| CT45A4     | 0.9210 | 1.0275 | 1.0496 | 0.9180 | 0.9790 | 0.0347 |
| LOC391730  | 1.0309 | 1.0281 | 0.9825 | 0.8746 | 0.9790 | 0.0365 |
| LOC340239  | 1.0031 | 1.0309 | 0.9751 | 0.9072 | 0.9790 | 0.0265 |
| GLI2       | 0.9353 | 0.9768 | 1.0504 | 0.9536 | 0.9791 | 0.0253 |
| INHBB      | 0.9234 | 1.0758 | 0.9356 | 0.9813 | 0.9791 | 0.0346 |
| ZSCAN23    | 0.9337 | 1.0886 | 0.9957 | 0.8983 | 0.9791 | 0.0417 |
| LOC389765  | 0.7729 | 1.1129 | 1.2689 | 0.7615 | 0.9791 | 0.1264 |
| CRYBB1     | 0.8154 | 1.2009 | 0.9553 | 0.9448 | 0.9791 | 0.0805 |
| PTCH1      | 0.9740 | 1.0332 | 1.0375 | 0.8716 | 0.9791 | 0.0386 |
| AMAC1L2    | 0.9861 | 1.0484 | 0.9694 | 0.9124 | 0.9791 | 0.0280 |
| LOC729645  | 0.9642 | 1.0685 | 0.9966 | 0.8871 | 0.9791 | 0.0376 |
| LOC1001339 | 0.8868 | 1.0371 | 1.0663 | 0.9260 | 0.9791 | 0.0431 |
| OR4K2      | 0.9208 | 1.0614 | 1.0040 | 0.9301 | 0.9791 | 0.0331 |
| LOC653879  | 0.8705 | 1.1242 | 1.0225 | 0.8992 | 0.9791 | 0.0585 |
| EFR3B      | 0.7723 | 1.2266 | 1.0151 | 0.9023 | 0.9791 | 0.0963 |
| C7orf31    | 0.8748 | 0.9828 | 1.1347 | 0.9241 | 0.9791 | 0.0564 |
| SOX4       | 0.8997 | 1.3055 | 1.0191 | 0.6922 | 0.9791 | 0.1280 |
| KLHL32     | 0.9361 | 1.0919 | 0.9996 | 0.8888 | 0.9791 | 0.0439 |
| LOC648473  | 1.0506 | 1.0910 | 0.8816 | 0.8932 | 0.9791 | 0.0536 |
| LOC653550  | 0.9228 | 1.0304 | 1.0747 | 0.8885 | 0.9791 | 0.0439 |

|            |        |        |        |        |        |        |
|------------|--------|--------|--------|--------|--------|--------|
| MIR507     | 0.9823 | 0.9779 | 0.9455 | 1.0108 | 0.9791 | 0.0134 |
| LOC729445  | 0.9735 | 1.0508 | 0.9745 | 0.9177 | 0.9791 | 0.0273 |
| INHA       | 0.9376 | 1.0384 | 1.0257 | 0.9148 | 0.9791 | 0.0310 |
| FRMD4A     | 0.9370 | 0.9484 | 1.1544 | 0.8768 | 0.9791 | 0.0605 |
| LOC644880  | 0.9503 | 1.1182 | 1.0792 | 0.7688 | 0.9791 | 0.0787 |
| FLJ40712   | 0.9372 | 1.1497 | 1.0346 | 0.7951 | 0.9791 | 0.0752 |
| LOC652703  | 0.8591 | 1.0697 | 1.1419 | 0.8458 | 0.9791 | 0.0747 |
| TBC1D3     | 0.9373 | 1.0558 | 0.9663 | 0.9572 | 0.9792 | 0.0263 |
| LOC645401  | 1.0515 | 1.0102 | 0.9692 | 0.8857 | 0.9792 | 0.0354 |
| LEPREL2    | 0.9460 | 1.0207 | 1.0006 | 0.9494 | 0.9792 | 0.0186 |
| LOC1001279 | 0.9172 | 1.0952 | 0.9990 | 0.9053 | 0.9792 | 0.0439 |
| LOC730517  | 0.9345 | 1.0564 | 1.0436 | 0.8821 | 0.9792 | 0.0424 |
| LOC646070  | 1.0237 | 0.9998 | 0.9760 | 0.9172 | 0.9792 | 0.0228 |
| OR2M7      | 1.0594 | 0.9970 | 0.9484 | 0.9120 | 0.9792 | 0.0319 |
| OPRM1      | 0.9447 | 1.0701 | 0.9767 | 0.9253 | 0.9792 | 0.0321 |
| FLJ10489   | 0.9219 | 1.0716 | 1.0678 | 0.8555 | 0.9792 | 0.0540 |
| DNER       | 0.9408 | 1.0895 | 0.9638 | 0.9227 | 0.9792 | 0.0377 |
| NANOG      | 0.9563 | 1.0772 | 1.0076 | 0.8757 | 0.9792 | 0.0425 |
| LOC728649  | 0.7795 | 1.0795 | 1.0577 | 1.0002 | 0.9792 | 0.0687 |
| LRRC33     | 0.8746 | 1.0514 | 0.9920 | 0.9989 | 0.9792 | 0.0373 |
| CLDN18     | 0.9743 | 1.0454 | 0.9759 | 0.9213 | 0.9792 | 0.0254 |
| PNMAL1     | 0.9452 | 1.0115 | 1.0501 | 0.9102 | 0.9792 | 0.0316 |
| ABCD4      | 0.9737 | 1.0309 | 1.0381 | 0.8741 | 0.9792 | 0.0379 |
| HAND2      | 0.8708 | 1.1284 | 1.0269 | 0.8908 | 0.9792 | 0.0606 |
| ERCC-00039 | 1.0497 | 1.0721 | 0.9158 | 0.8793 | 0.9792 | 0.0480 |
| BAGE4      | 0.9631 | 1.0597 | 1.0050 | 0.8891 | 0.9792 | 0.0360 |
| FAM96B     | 0.7615 | 1.4207 | 0.9594 | 0.7753 | 0.9792 | 0.1539 |
| LOC1001311 | 0.8881 | 1.1062 | 1.0259 | 0.8967 | 0.9792 | 0.0528 |
| LOC1001283 | 0.8918 | 1.1524 | 1.0196 | 0.8532 | 0.9792 | 0.0678 |
| NFAT5      | 0.8365 | 1.3579 | 0.8864 | 0.8361 | 0.9792 | 0.1268 |
| ZNF229     | 1.0065 | 1.0306 | 1.0029 | 0.8769 | 0.9792 | 0.0346 |
| LOC285634  | 0.9195 | 1.0632 | 1.0216 | 0.9128 | 0.9793 | 0.0375 |
| LOC653075  | 0.9472 | 1.0719 | 1.0270 | 0.8710 | 0.9793 | 0.0444 |
| LOC441847  | 0.9141 | 1.0703 | 1.0090 | 0.9237 | 0.9793 | 0.0371 |
| SELV       | 0.8098 | 1.1156 | 1.0786 | 0.9130 | 0.9793 | 0.0716 |
| LOC652618  | 0.9568 | 1.0392 | 1.0167 | 0.9045 | 0.9793 | 0.0304 |
| MGC22014   | 0.9033 | 1.0671 | 1.0628 | 0.8839 | 0.9793 | 0.0496 |
| PPARGC1A   | 0.9392 | 1.0842 | 0.9942 | 0.8996 | 0.9793 | 0.0400 |
| FAM90A16   | 0.9659 | 1.0747 | 1.0407 | 0.8358 | 0.9793 | 0.0530 |
| LOC645261  | 1.0059 | 1.0465 | 0.9538 | 0.9109 | 0.9793 | 0.0297 |
| LOC1001331 | 0.9078 | 1.2280 | 0.9907 | 0.7907 | 0.9793 | 0.0925 |
| LTBP2      | 0.9436 | 1.0355 | 1.1055 | 0.8325 | 0.9793 | 0.0591 |
| LOC1001304 | 0.9867 | 1.0973 | 0.9642 | 0.8690 | 0.9793 | 0.0469 |
| LOC440421  | 0.9999 | 1.1376 | 0.8629 | 0.9168 | 0.9793 | 0.0598 |
| MIR485     | 0.9575 | 0.9699 | 1.0733 | 0.9166 | 0.9793 | 0.0333 |
| DYSFIP1    | 0.9941 | 1.0602 | 0.9571 | 0.9059 | 0.9793 | 0.0325 |

|            |        |        |        |        |        |        |
|------------|--------|--------|--------|--------|--------|--------|
| FLJ11783   | 1.0018 | 1.0797 | 0.9437 | 0.8921 | 0.9793 | 0.0403 |
| MSX2       | 0.8191 | 1.1121 | 1.0500 | 0.9361 | 0.9793 | 0.0647 |
| LOC728157  | 0.9166 | 1.1293 | 1.0780 | 0.7934 | 0.9793 | 0.0768 |
| LOC642830  | 0.9197 | 1.0699 | 1.0350 | 0.8927 | 0.9793 | 0.0432 |
| LOC1001301 | 0.8980 | 1.0405 | 1.0557 | 0.9231 | 0.9793 | 0.0402 |
| ACADS      | 0.9824 | 1.2435 | 0.9563 | 0.7352 | 0.9794 | 0.1040 |
| MIR146B    | 0.9526 | 1.0593 | 1.0010 | 0.9045 | 0.9794 | 0.0331 |
| VAMP1      | 0.8881 | 1.0759 | 1.0669 | 0.8865 | 0.9794 | 0.0532 |
| ADIG       | 0.9648 | 1.0554 | 0.9480 | 0.9493 | 0.9794 | 0.0256 |
| PACRGL     | 0.9860 | 1.0688 | 0.9483 | 0.9144 | 0.9794 | 0.0332 |
| LY9        | 0.8981 | 1.0637 | 0.9813 | 0.9744 | 0.9794 | 0.0338 |
| DIRAS2     | 0.9332 | 1.0936 | 1.0095 | 0.8812 | 0.9794 | 0.0463 |
| KRT86      | 0.8800 | 1.0197 | 1.1198 | 0.8980 | 0.9794 | 0.0561 |
| RHBG       | 1.0170 | 1.0763 | 1.0243 | 0.7999 | 0.9794 | 0.0613 |
| LOC643075  | 0.9576 | 1.0238 | 1.0181 | 0.9180 | 0.9794 | 0.0254 |
| C12orf27   | 0.9170 | 1.0811 | 1.0649 | 0.8545 | 0.9794 | 0.0557 |
| LOC1001283 | 0.8781 | 1.0772 | 1.0724 | 0.8898 | 0.9794 | 0.0552 |
| LOC650203  | 0.9639 | 1.1157 | 1.0486 | 0.7894 | 0.9794 | 0.0705 |
| LHX6       | 0.9898 | 1.0331 | 1.0271 | 0.8675 | 0.9794 | 0.0385 |
| FLJ41047   | 0.9961 | 1.0932 | 0.9327 | 0.8956 | 0.9794 | 0.0432 |
| FLJ42986   | 0.9383 | 1.0086 | 0.9968 | 0.9739 | 0.9794 | 0.0155 |
| MIR1263    | 0.8494 | 1.0892 | 1.0265 | 0.9525 | 0.9794 | 0.0515 |
| LOC643696  | 0.9519 | 0.9731 | 1.0147 | 0.9779 | 0.9794 | 0.0131 |
| LOC651195  | 0.8770 | 1.0891 | 1.1142 | 0.8374 | 0.9794 | 0.0712 |
| LOC391574  | 0.9694 | 1.0134 | 1.0053 | 0.9296 | 0.9794 | 0.0192 |
| CARD18     | 0.9417 | 1.0591 | 1.0248 | 0.8921 | 0.9794 | 0.0381 |
| FLJ10357   | 0.9114 | 1.0806 | 1.0140 | 0.9118 | 0.9794 | 0.0415 |
| ABRA       | 1.0191 | 1.0872 | 0.9451 | 0.8664 | 0.9794 | 0.0476 |
| FAM44A     | 0.8551 | 1.1989 | 0.9832 | 0.8806 | 0.9795 | 0.0782 |
| GEM        | 0.9733 | 1.0582 | 0.9992 | 0.8871 | 0.9795 | 0.0355 |
| PDGFA      | 0.8700 | 1.1005 | 1.0165 | 0.9308 | 0.9795 | 0.0503 |
| LOC732043  | 0.8743 | 1.1609 | 0.9833 | 0.8994 | 0.9795 | 0.0648 |
| TCP11L2    | 0.8327 | 1.1281 | 1.1021 | 0.8550 | 0.9795 | 0.0786 |
| LOC644473  | 0.9798 | 1.1530 | 0.9533 | 0.8319 | 0.9795 | 0.0662 |
| MS4A3      | 0.9067 | 1.0870 | 1.0172 | 0.9071 | 0.9795 | 0.0443 |
| LOC91664   | 0.9237 | 1.1100 | 0.8997 | 0.9845 | 0.9795 | 0.0470 |
| USP30      | 0.8252 | 1.3864 | 0.8799 | 0.8264 | 0.9795 | 0.1362 |
| C6orf15    | 1.0254 | 0.9473 | 1.0305 | 0.9147 | 0.9795 | 0.0288 |
| LOC1001341 | 0.8805 | 1.1149 | 1.0099 | 0.9127 | 0.9795 | 0.0528 |
| LOC388906  | 1.0026 | 1.0821 | 0.9731 | 0.8603 | 0.9795 | 0.0459 |
| LOC642812  | 0.8640 | 1.1370 | 0.9632 | 0.9538 | 0.9795 | 0.0570 |
| EVC2       | 1.0225 | 0.9999 | 0.9755 | 0.9202 | 0.9795 | 0.0220 |
| LOC642597  | 0.8878 | 1.1277 | 1.0436 | 0.8589 | 0.9795 | 0.0639 |
| LOC1001315 | 0.9047 | 1.0713 | 1.0483 | 0.8937 | 0.9795 | 0.0467 |
| C20orf91   | 0.9918 | 1.0168 | 0.9724 | 0.9370 | 0.9795 | 0.0168 |
| DPT        | 0.8550 | 1.1248 | 1.0942 | 0.8442 | 0.9795 | 0.0753 |

|            |        |        |        |        |        |        |
|------------|--------|--------|--------|--------|--------|--------|
| LOC644599  | 0.9454 | 1.1719 | 0.9524 | 0.8484 | 0.9795 | 0.0684 |
| LOC1001284 | 1.0203 | 1.0931 | 0.9123 | 0.8925 | 0.9795 | 0.0471 |
| TBXA2R     | 0.9363 | 1.0443 | 1.0303 | 0.9073 | 0.9795 | 0.0340 |
| LOC646627  | 0.9029 | 1.0829 | 1.0587 | 0.8736 | 0.9795 | 0.0533 |
| LOC651314  | 0.8961 | 1.1202 | 0.9498 | 0.9522 | 0.9796 | 0.0486 |
| LOC1001306 | 0.8560 | 1.0908 | 1.0367 | 0.9348 | 0.9796 | 0.0524 |
| STK10      | 0.9529 | 1.0399 | 1.0013 | 0.9241 | 0.9796 | 0.0256 |
| MYL4       | 0.9258 | 1.0736 | 1.0729 | 0.8460 | 0.9796 | 0.0565 |
| MAGEA4     | 0.9376 | 1.1726 | 0.9346 | 0.8733 | 0.9796 | 0.0660 |
| UQCRB      | 0.8604 | 1.3436 | 1.0452 | 0.6690 | 0.9796 | 0.1436 |
| LOC1001317 | 0.9213 | 1.0062 | 1.0311 | 0.9597 | 0.9796 | 0.0244 |
| SLC34A2    | 0.9727 | 1.0544 | 0.9401 | 0.9511 | 0.9796 | 0.0258 |
| VIM        | 0.7939 | 1.2333 | 1.0477 | 0.8434 | 0.9796 | 0.1008 |
| LOC643386  | 0.9064 | 1.0112 | 1.0406 | 0.9601 | 0.9796 | 0.0295 |
| LOC1001335 | 0.8954 | 1.0572 | 1.0265 | 0.9392 | 0.9796 | 0.0376 |
| KLHL25     | 0.9619 | 1.0884 | 1.0610 | 0.8070 | 0.9796 | 0.0636 |
| OR5J2      | 0.8881 | 1.0570 | 0.9840 | 0.9892 | 0.9796 | 0.0347 |
| SNORA46    | 0.9678 | 1.1080 | 0.9946 | 0.8480 | 0.9796 | 0.0534 |
| ABCC6      | 0.9114 | 1.0608 | 1.0584 | 0.8879 | 0.9796 | 0.0464 |
| LOC1001295 | 0.9647 | 1.0266 | 0.9900 | 0.9371 | 0.9796 | 0.0190 |
| LOC1001332 | 0.8955 | 1.0939 | 1.0037 | 0.9253 | 0.9796 | 0.0444 |
| CDH23      | 0.9525 | 1.0977 | 0.9725 | 0.8957 | 0.9796 | 0.0426 |
| OR1E2      | 0.9567 | 1.0326 | 1.0258 | 0.9034 | 0.9796 | 0.0306 |
| LOC728450  | 0.9361 | 1.0052 | 1.0271 | 0.9500 | 0.9796 | 0.0218 |
| OR4N5      | 0.9422 | 1.1054 | 1.0235 | 0.8474 | 0.9796 | 0.0553 |
| GNA12      | 0.9334 | 1.1803 | 0.9644 | 0.8404 | 0.9796 | 0.0719 |
| LOC651398  | 0.9378 | 1.1172 | 1.0599 | 0.8036 | 0.9796 | 0.0696 |
| C15orf40   | 0.8178 | 1.1796 | 1.0626 | 0.8585 | 0.9796 | 0.0855 |
| LBA1       | 0.8556 | 1.0855 | 1.0776 | 0.8998 | 0.9796 | 0.0596 |
| LOC643072  | 0.8698 | 1.1479 | 0.9948 | 0.9060 | 0.9796 | 0.0619 |
| LOC1001307 | 0.8752 | 1.1007 | 1.0062 | 0.9364 | 0.9797 | 0.0484 |
| ERCC4      | 0.8387 | 1.1082 | 1.0311 | 0.9407 | 0.9797 | 0.0581 |
| FAM3B      | 0.9006 | 1.0826 | 1.1009 | 0.8345 | 0.9797 | 0.0662 |
| LOC653971  | 0.8699 | 1.0762 | 1.0879 | 0.8848 | 0.9797 | 0.0592 |
| TLR7       | 1.0078 | 1.0634 | 0.9987 | 0.8488 | 0.9797 | 0.0459 |
| PTTG2      | 0.9265 | 1.1541 | 0.9604 | 0.8778 | 0.9797 | 0.0605 |
| MGC45800   | 1.0851 | 1.0001 | 0.9595 | 0.8741 | 0.9797 | 0.0438 |
| NLGN3      | 0.9747 | 1.1670 | 0.9011 | 0.8759 | 0.9797 | 0.0659 |
| LOC728711  | 1.0091 | 1.0379 | 0.9839 | 0.8879 | 0.9797 | 0.0325 |
| LOC729032  | 0.9776 | 1.0881 | 0.9700 | 0.8831 | 0.9797 | 0.0420 |
| OR5W2      | 0.9799 | 1.0032 | 0.9988 | 0.9369 | 0.9797 | 0.0152 |
| MYADML     | 0.8800 | 1.1917 | 0.9738 | 0.8733 | 0.9797 | 0.0743 |
| DGAT2L6    | 0.9386 | 1.0404 | 1.0548 | 0.8850 | 0.9797 | 0.0408 |
| ERCC-00120 | 0.9168 | 1.1234 | 0.9428 | 0.9358 | 0.9797 | 0.0482 |
| GNA14      | 1.0004 | 1.0150 | 0.9780 | 0.9255 | 0.9797 | 0.0196 |
| UNC45A     | 1.0447 | 1.2878 | 0.9307 | 0.6556 | 0.9797 | 0.1312 |

|            |        |        |        |        |        |        |
|------------|--------|--------|--------|--------|--------|--------|
| SAA2       | 0.9609 | 1.0640 | 1.0597 | 0.8342 | 0.9797 | 0.0540 |
| P2RX5      | 0.9262 | 1.0909 | 0.9961 | 0.9057 | 0.9797 | 0.0418 |
| NCDN       | 0.8894 | 1.1804 | 1.0604 | 0.7888 | 0.9797 | 0.0873 |
| LOC641860  | 0.9924 | 1.0467 | 0.9843 | 0.8956 | 0.9797 | 0.0313 |
| UNC93A     | 0.9967 | 1.0618 | 0.9367 | 0.9237 | 0.9797 | 0.0316 |
| FAM120B    | 0.9617 | 1.3609 | 0.8271 | 0.7692 | 0.9797 | 0.1333 |
| RGS6       | 0.8538 | 1.1167 | 0.9836 | 0.9648 | 0.9797 | 0.0539 |
| LOC650128  | 0.8959 | 1.1869 | 1.0030 | 0.8331 | 0.9797 | 0.0774 |
| NRG3       | 0.8743 | 1.1108 | 0.9980 | 0.9358 | 0.9797 | 0.0505 |
| LOC651747  | 0.8970 | 1.1123 | 0.9839 | 0.9258 | 0.9797 | 0.0478 |
| POU4F3     | 0.9558 | 1.0639 | 0.9794 | 0.9200 | 0.9798 | 0.0306 |
| ANKAR      | 0.8572 | 1.0296 | 1.0600 | 0.9722 | 0.9798 | 0.0447 |
| L3MBTL2    | 0.9114 | 1.2697 | 0.9887 | 0.7492 | 0.9798 | 0.1088 |
| MDGA2      | 0.9318 | 1.0326 | 1.0448 | 0.9098 | 0.9798 | 0.0344 |
| LOC649299  | 0.8382 | 1.0972 | 1.0796 | 0.9040 | 0.9798 | 0.0642 |
| LOC651746  | 0.8954 | 1.1416 | 0.9477 | 0.9343 | 0.9798 | 0.0551 |
| RABL2A     | 0.8824 | 1.1051 | 0.9708 | 0.9607 | 0.9798 | 0.0462 |
| LOC643378  | 1.0078 | 1.0328 | 0.9998 | 0.8787 | 0.9798 | 0.0344 |
| HHLA1      | 0.9821 | 1.0503 | 0.9933 | 0.8934 | 0.9798 | 0.0324 |
| OR8K1      | 1.0175 | 1.0155 | 0.8888 | 0.9974 | 0.9798 | 0.0307 |
| TNRC9      | 1.0146 | 1.0244 | 1.1048 | 0.7754 | 0.9798 | 0.0711 |
| LOC387646  | 0.8867 | 1.0549 | 1.0644 | 0.9132 | 0.9798 | 0.0465 |
| ARVP6125   | 0.9253 | 1.0930 | 0.9767 | 0.9241 | 0.9798 | 0.0397 |
| GIMAP8     | 1.0093 | 1.0008 | 1.0747 | 0.8343 | 0.9798 | 0.0512 |
| OR2B2      | 0.7685 | 1.1633 | 1.1036 | 0.8836 | 0.9798 | 0.0926 |
| KRTAP19-7  | 0.9756 | 1.0506 | 0.9759 | 0.9171 | 0.9798 | 0.0273 |
| OR8H2      | 0.9286 | 1.0461 | 1.0315 | 0.9130 | 0.9798 | 0.0343 |
| UPK1A      | 0.9212 | 1.0620 | 1.0091 | 0.9268 | 0.9798 | 0.0340 |
| LOC1001292 | 0.9525 | 1.1186 | 1.0209 | 0.8273 | 0.9798 | 0.0612 |
| PCBP4      | 0.9229 | 1.1195 | 0.9887 | 0.8881 | 0.9798 | 0.0510 |
| RBM20      | 0.9588 | 1.0393 | 1.0244 | 0.8967 | 0.9798 | 0.0328 |
| VIL1       | 0.9133 | 1.0404 | 1.0525 | 0.9131 | 0.9798 | 0.0385 |
| GDF6       | 0.9124 | 1.0055 | 1.0760 | 0.9254 | 0.9798 | 0.0381 |
| AIF1       | 0.9334 | 1.1626 | 0.9970 | 0.8263 | 0.9798 | 0.0704 |
| MICALL1    | 0.9587 | 1.1439 | 1.0098 | 0.8069 | 0.9798 | 0.0696 |
| C9orf150   | 1.0593 | 0.9829 | 0.9998 | 0.8773 | 0.9798 | 0.0379 |
| HERC2P2    | 0.9396 | 1.0655 | 1.0113 | 0.9029 | 0.9798 | 0.0364 |
| OR6S1      | 0.8956 | 1.0314 | 1.0800 | 0.9124 | 0.9798 | 0.0450 |
| LOC728807  | 0.9355 | 0.9791 | 1.0571 | 0.9478 | 0.9799 | 0.0273 |
| SSTR4      | 0.9587 | 1.0648 | 0.9937 | 0.9023 | 0.9799 | 0.0340 |
| LOC1001316 | 0.9456 | 1.0341 | 1.0363 | 0.9034 | 0.9799 | 0.0331 |
| NLRP13     | 0.9904 | 0.9932 | 1.0624 | 0.8735 | 0.9799 | 0.0392 |
| LOC648585  | 0.9862 | 1.0251 | 1.0142 | 0.8940 | 0.9799 | 0.0298 |
| OPN1SW     | 0.8676 | 0.9739 | 1.1297 | 0.9483 | 0.9799 | 0.0548 |
| WFDC12     | 0.9257 | 1.0892 | 1.0347 | 0.8698 | 0.9799 | 0.0500 |
| LOC646769  | 0.9402 | 1.1224 | 1.0218 | 0.8351 | 0.9799 | 0.0610 |

|            |        |        |        |        |        |        |
|------------|--------|--------|--------|--------|--------|--------|
| TTBK1      | 0.8896 | 1.1059 | 1.1179 | 0.8061 | 0.9799 | 0.0782 |
| CBWD1      | 0.9393 | 1.0782 | 0.9762 | 0.9259 | 0.9799 | 0.0344 |
| KCNIP4     | 0.9344 | 1.0788 | 0.9962 | 0.9101 | 0.9799 | 0.0376 |
| LOC727899  | 0.8519 | 1.0617 | 1.1220 | 0.8839 | 0.9799 | 0.0661 |
| LOC441340  | 0.9039 | 1.0028 | 1.1460 | 0.8668 | 0.9799 | 0.0624 |
| LOC1001348 | 0.9291 | 1.1008 | 1.0317 | 0.8580 | 0.9799 | 0.0538 |
| LOC728419  | 0.9171 | 1.0045 | 1.0652 | 0.9327 | 0.9799 | 0.0342 |
| LOC644457  | 0.8498 | 1.0853 | 0.9937 | 0.9908 | 0.9799 | 0.0486 |
| GH2        | 0.9148 | 1.0689 | 1.0527 | 0.8832 | 0.9799 | 0.0473 |
| CR1        | 0.9463 | 1.0563 | 0.9794 | 0.9375 | 0.9799 | 0.0270 |
| ETV3L      | 0.9635 | 1.0917 | 0.9396 | 0.9248 | 0.9799 | 0.0381 |
| MIR181A1   | 0.9038 | 0.9457 | 1.0661 | 1.0040 | 0.9799 | 0.0353 |
| LOC643045  | 0.8739 | 1.0693 | 1.0636 | 0.9130 | 0.9799 | 0.0506 |
| KIR2DS1    | 0.9537 | 1.0493 | 0.9952 | 0.9215 | 0.9799 | 0.0276 |
| TMSB10     | 0.8205 | 1.2166 | 1.0410 | 0.8416 | 0.9799 | 0.0932 |
| SNORD121A  | 0.9327 | 1.1005 | 0.9236 | 0.9630 | 0.9799 | 0.0411 |
| FAM19A2    | 0.9187 | 1.1243 | 0.9631 | 0.9136 | 0.9799 | 0.0494 |
| LOC645992  | 1.0433 | 1.0800 | 0.9194 | 0.8771 | 0.9799 | 0.0485 |
| COLEC11    | 0.9362 | 1.0974 | 1.0414 | 0.8448 | 0.9799 | 0.0561 |
| ASXL3      | 0.9561 | 1.0599 | 0.9730 | 0.9308 | 0.9799 | 0.0280 |
| PDS5A      | 0.8930 | 1.3909 | 0.8929 | 0.7430 | 0.9799 | 0.1415 |
| LOC652195  | 1.0068 | 1.0404 | 1.1605 | 0.7121 | 0.9799 | 0.0952 |
| HIST1H1A   | 0.7974 | 1.2625 | 1.0442 | 0.8156 | 0.9800 | 0.1096 |
| LOC646709  | 0.9560 | 1.1360 | 1.0563 | 0.7715 | 0.9800 | 0.0786 |
| KIAA1245   | 0.9338 | 1.0150 | 1.0420 | 0.9291 | 0.9800 | 0.0286 |
| HTR1B      | 0.9263 | 1.1208 | 0.8817 | 0.9910 | 0.9800 | 0.0520 |
| TTY9A      | 1.0003 | 1.0152 | 1.0144 | 0.8900 | 0.9800 | 0.0302 |
| LOC653569  | 0.8855 | 1.1631 | 1.0238 | 0.8473 | 0.9800 | 0.0719 |
| SLC22A20   | 1.0120 | 1.0518 | 1.0526 | 0.8034 | 0.9800 | 0.0596 |
| LIN7A      | 0.7304 | 1.3313 | 1.1709 | 0.6872 | 0.9800 | 0.1602 |
| KIAA0888   | 0.9086 | 1.0850 | 1.0247 | 0.9017 | 0.9800 | 0.0450 |
| PIGH       | 0.8226 | 1.2045 | 1.2075 | 0.6853 | 0.9800 | 0.1335 |
| TMED6      | 0.8740 | 1.0249 | 1.0160 | 1.0050 | 0.9800 | 0.0356 |
| BOC        | 0.8892 | 1.0534 | 1.0319 | 0.9454 | 0.9800 | 0.0382 |
| LOC645218  | 0.9183 | 1.1119 | 0.9856 | 0.9041 | 0.9800 | 0.0474 |
| MAP4K1     | 0.9297 | 1.0851 | 0.9826 | 0.9225 | 0.9800 | 0.0375 |
| psiTPTE22  | 0.9135 | 1.0176 | 1.1018 | 0.8871 | 0.9800 | 0.0494 |
| TRPV1      | 0.9416 | 1.0365 | 1.0040 | 0.9379 | 0.9800 | 0.0242 |
| IGF1R      | 1.0639 | 1.0952 | 0.9157 | 0.8453 | 0.9800 | 0.0596 |
| KIAA0467   | 0.9450 | 0.9896 | 1.0624 | 0.9230 | 0.9800 | 0.0308 |
| LOC642222  | 0.8874 | 1.2431 | 0.9096 | 0.8800 | 0.9800 | 0.0879 |
| CDC2L5     | 0.8502 | 1.2230 | 1.0001 | 0.8468 | 0.9800 | 0.0885 |
| LOC391092  | 0.9249 | 1.1152 | 1.0133 | 0.8666 | 0.9800 | 0.0542 |
| LOC645745  | 0.9550 | 0.9838 | 1.0562 | 0.9250 | 0.9800 | 0.0281 |
| LOC402199  | 0.9861 | 1.0593 | 0.9943 | 0.8805 | 0.9800 | 0.0370 |
| APOE       | 0.9334 | 1.0245 | 1.0814 | 0.8809 | 0.9800 | 0.0450 |



|            |        |        |        |        |        |        |
|------------|--------|--------|--------|--------|--------|--------|
| LOC650914  | 0.8810 | 1.0635 | 1.0578 | 0.9179 | 0.9800 | 0.0472 |
| MAK        | 1.0000 | 1.2014 | 0.8823 | 0.8364 | 0.9800 | 0.0814 |
| KCNJ8      | 0.8210 | 1.1704 | 1.0479 | 0.8809 | 0.9800 | 0.0796 |
| GALNT9     | 0.9402 | 1.0828 | 1.0192 | 0.8780 | 0.9800 | 0.0448 |
| AKT3       | 0.9105 | 1.0821 | 1.0448 | 0.8828 | 0.9800 | 0.0491 |
| LOC648667  | 0.9442 | 0.9885 | 1.0476 | 0.9399 | 0.9800 | 0.0251 |
| MIR1293    | 0.9801 | 1.1561 | 0.9287 | 0.8553 | 0.9800 | 0.0640 |
| LOC650034  | 0.8638 | 1.1750 | 0.9989 | 0.8824 | 0.9800 | 0.0715 |
| VTRNA1-1   | 0.9410 | 0.9137 | 1.2760 | 0.7896 | 0.9801 | 0.1040 |
| VSTM2      | 1.0021 | 1.0058 | 0.9698 | 0.9425 | 0.9801 | 0.0149 |
| LOC392264  | 0.9244 | 1.1087 | 0.9478 | 0.9394 | 0.9801 | 0.0431 |
| MIR548N    | 0.9325 | 0.9780 | 1.0644 | 0.9454 | 0.9801 | 0.0297 |
| PHLDB2     | 0.9956 | 1.1014 | 0.9211 | 0.9022 | 0.9801 | 0.0452 |
| HBB        | 0.9880 | 1.0375 | 0.9439 | 0.9509 | 0.9801 | 0.0215 |
| LOC653338  | 0.8902 | 1.0479 | 1.0750 | 0.9073 | 0.9801 | 0.0474 |
| LOC647941  | 0.8561 | 1.1313 | 0.9679 | 0.9652 | 0.9801 | 0.0567 |
| FABP9      | 0.9683 | 1.0658 | 1.0217 | 0.8647 | 0.9801 | 0.0433 |
| LOC643033  | 0.8788 | 1.0836 | 1.0426 | 0.9156 | 0.9801 | 0.0492 |
| LOC644388  | 0.9667 | 0.9151 | 1.0657 | 0.9730 | 0.9801 | 0.0313 |
| SLC3A1     | 0.9319 | 1.0986 | 0.9769 | 0.9132 | 0.9801 | 0.0417 |
| LOC90342   | 0.9488 | 1.0670 | 1.0369 | 0.8679 | 0.9801 | 0.0451 |
| LOC1001324 | 1.0997 | 1.0528 | 0.9393 | 0.8287 | 0.9801 | 0.0607 |
| H1FOO      | 0.9731 | 1.0974 | 1.0071 | 0.8430 | 0.9801 | 0.0527 |
| C12orf8    | 0.9327 | 1.0847 | 1.0550 | 0.8482 | 0.9801 | 0.0549 |
| LOC285346  | 1.0234 | 1.1453 | 0.9177 | 0.8342 | 0.9801 | 0.0673 |
| SLA2       | 0.9245 | 1.1109 | 0.9739 | 0.9113 | 0.9801 | 0.0456 |
| DKFZp686K1 | 0.8470 | 1.1933 | 1.0047 | 0.8756 | 0.9802 | 0.0789 |
| LOC653806  | 0.8861 | 1.1579 | 0.9626 | 0.9140 | 0.9802 | 0.0613 |
| LOC644286  | 0.9035 | 1.1024 | 0.9309 | 0.9838 | 0.9802 | 0.0440 |
| LOC1001294 | 0.9401 | 1.1172 | 1.0433 | 0.8200 | 0.9802 | 0.0646 |
| MIR26A2    | 0.9505 | 1.0416 | 1.0198 | 0.9088 | 0.9802 | 0.0307 |
| LOC644380  | 0.9087 | 1.0327 | 1.0822 | 0.8971 | 0.9802 | 0.0458 |
| C21orf129  | 1.0585 | 0.9824 | 0.9758 | 0.9041 | 0.9802 | 0.0315 |
| PLAU       | 0.8207 | 0.9880 | 1.1585 | 0.9534 | 0.9802 | 0.0695 |
| TMEM133    | 1.0022 | 1.0143 | 1.0151 | 0.8891 | 0.9802 | 0.0305 |
| FABP5L3    | 0.9689 | 1.0126 | 0.9788 | 0.9605 | 0.9802 | 0.0114 |
| ATP1B4     | 0.9448 | 1.0454 | 1.0673 | 0.8633 | 0.9802 | 0.0472 |
| IRF4       | 0.9307 | 1.0504 | 1.0886 | 0.8511 | 0.9802 | 0.0546 |
| LOC644068  | 1.0000 | 1.0061 | 0.9486 | 0.9660 | 0.9802 | 0.0137 |
| LOC731106  | 0.9427 | 1.0510 | 1.0046 | 0.9225 | 0.9802 | 0.0294 |
| SLC25A31   | 0.8857 | 1.0989 | 1.0848 | 0.8514 | 0.9802 | 0.0649 |
| NAB2       | 0.8525 | 1.4923 | 0.9632 | 0.6128 | 0.9802 | 0.1857 |
| NT5C1A     | 0.9122 | 0.9736 | 0.9895 | 1.0455 | 0.9802 | 0.0274 |
| ONECUT3    | 0.9531 | 0.9222 | 1.0391 | 1.0065 | 0.9802 | 0.0262 |
| LOC146481  | 0.9110 | 1.0192 | 1.0555 | 0.9351 | 0.9802 | 0.0342 |
| C6orf203   | 0.9818 | 1.0443 | 1.0622 | 0.8326 | 0.9802 | 0.0521 |

|            |        |        |        |        |        |        |
|------------|--------|--------|--------|--------|--------|--------|
| LOC727960  | 0.9458 | 1.1173 | 0.9679 | 0.8899 | 0.9802 | 0.0486 |
| LOC1001309 | 0.9126 | 1.1217 | 0.9681 | 0.9186 | 0.9802 | 0.0488 |
| LOC729920  | 0.8878 | 1.1224 | 0.9913 | 0.9194 | 0.9802 | 0.0521 |
| LOC644715  | 0.8622 | 1.2429 | 0.9913 | 0.8246 | 0.9802 | 0.0945 |
| LOC1001332 | 0.9133 | 1.0140 | 1.0234 | 0.9703 | 0.9802 | 0.0251 |
| LOC389362  | 0.9994 | 1.1526 | 0.9982 | 0.7708 | 0.9802 | 0.0787 |
| LOC133993  | 0.9270 | 1.0652 | 0.9900 | 0.9388 | 0.9802 | 0.0314 |
| LOC646664  | 0.9397 | 0.9880 | 1.1182 | 0.8752 | 0.9803 | 0.0514 |
| LOC727858  | 0.9075 | 1.1024 | 1.0154 | 0.8957 | 0.9803 | 0.0488 |
| LOC646103  | 0.9735 | 1.0670 | 1.0731 | 0.8075 | 0.9803 | 0.0619 |
| MTMR8      | 1.0084 | 0.9986 | 1.0230 | 0.8911 | 0.9803 | 0.0302 |
| LLGL1      | 0.9759 | 1.4550 | 0.7290 | 0.7612 | 0.9803 | 0.1675 |
| LOC387940  | 1.0142 | 1.0228 | 1.0220 | 0.8620 | 0.9803 | 0.0395 |
| ZNF432     | 0.8856 | 1.2021 | 0.9388 | 0.8946 | 0.9803 | 0.0749 |
| CTRB2      | 0.8872 | 1.0539 | 0.9739 | 1.0061 | 0.9803 | 0.0351 |
| LOC1001339 | 0.9535 | 1.0244 | 0.9928 | 0.9505 | 0.9803 | 0.0176 |
| DPPA3      | 0.9166 | 1.1243 | 1.0368 | 0.8434 | 0.9803 | 0.0624 |
| LOC644412  | 0.9764 | 1.0070 | 1.0539 | 0.8838 | 0.9803 | 0.0359 |
| LOC1001295 | 0.8973 | 1.0197 | 1.0967 | 0.9075 | 0.9803 | 0.0477 |
| MIR598     | 0.8957 | 1.1779 | 0.9375 | 0.9101 | 0.9803 | 0.0664 |
| LOC644285  | 0.9634 | 1.0188 | 0.9723 | 0.9668 | 0.9803 | 0.0130 |
| CUGBP2     | 0.9004 | 1.0311 | 1.0112 | 0.9787 | 0.9803 | 0.0288 |
| ATXN7      | 0.9174 | 1.0804 | 1.1057 | 0.8179 | 0.9803 | 0.0684 |
| LENG1      | 0.8207 | 1.1831 | 0.9679 | 0.9497 | 0.9803 | 0.0751 |
| RPL23AP13  | 0.9528 | 1.0481 | 1.1325 | 0.7880 | 0.9804 | 0.0739 |
| C18orf2    | 0.8786 | 1.0835 | 1.0366 | 0.9227 | 0.9804 | 0.0478 |
| ECD        | 0.7909 | 1.2513 | 1.1308 | 0.7484 | 0.9804 | 0.1244 |
| TLR4       | 0.9787 | 1.1012 | 0.9307 | 0.9108 | 0.9804 | 0.0427 |
| MIR1202    | 0.9397 | 1.0394 | 1.0123 | 0.9301 | 0.9804 | 0.0269 |
| RCVRN      | 0.8433 | 1.0993 | 0.9831 | 0.9956 | 0.9804 | 0.0526 |
| LOC647181  | 0.9470 | 1.1024 | 0.9537 | 0.9184 | 0.9804 | 0.0414 |
| LOC651603  | 0.8935 | 0.9989 | 1.0936 | 0.9355 | 0.9804 | 0.0435 |
| APOC4      | 0.8655 | 1.0724 | 1.0228 | 0.9608 | 0.9804 | 0.0446 |
| LOC1001347 | 0.9175 | 1.1424 | 0.8174 | 1.0443 | 0.9804 | 0.0712 |
| CLNK       | 0.9065 | 1.1906 | 0.9295 | 0.8950 | 0.9804 | 0.0704 |
| PBLD       | 0.9168 | 1.1067 | 1.0058 | 0.8923 | 0.9804 | 0.0487 |
| LOC652659  | 0.8895 | 1.1050 | 1.0189 | 0.9083 | 0.9804 | 0.0504 |
| KIAA1644   | 0.8671 | 1.2319 | 0.9270 | 0.8957 | 0.9804 | 0.0847 |
| TCEB3CL    | 0.8941 | 1.0810 | 1.0015 | 0.9451 | 0.9804 | 0.0401 |
| TBC1D3E    | 0.8931 | 1.0986 | 1.0309 | 0.8990 | 0.9804 | 0.0506 |
| HTN3       | 1.0014 | 1.1421 | 0.9064 | 0.8717 | 0.9804 | 0.0605 |
| SPP1       | 0.8843 | 1.0845 | 1.1164 | 0.8366 | 0.9804 | 0.0703 |
| LOC644516  | 1.0029 | 1.0525 | 0.9886 | 0.8778 | 0.9804 | 0.0368 |
| LOC641719  | 0.9053 | 1.1276 | 1.0095 | 0.8795 | 0.9804 | 0.0565 |
| LOC1001294 | 0.8957 | 1.1047 | 1.0349 | 0.8866 | 0.9805 | 0.0535 |
| RCL1       | 0.7944 | 1.5104 | 0.9844 | 0.6327 | 0.9805 | 0.1907 |

|            |        |        |        |        |        |        |
|------------|--------|--------|--------|--------|--------|--------|
| KRT33A     | 0.9434 | 1.1367 | 0.9628 | 0.8790 | 0.9805 | 0.0551 |
| LOC649917  | 0.9472 | 1.0810 | 0.9848 | 0.9089 | 0.9805 | 0.0369 |
| SNTN       | 1.0065 | 1.0134 | 0.9810 | 0.9210 | 0.9805 | 0.0210 |
| IFNA4      | 0.8899 | 1.1102 | 1.0269 | 0.8948 | 0.9805 | 0.0536 |
| HAVCR1     | 0.9500 | 1.1211 | 0.9198 | 0.9310 | 0.9805 | 0.0473 |
| C13orf31   | 1.0091 | 1.1404 | 0.9083 | 0.8642 | 0.9805 | 0.0613 |
| SPOCK3     | 0.9528 | 1.1046 | 1.0331 | 0.8315 | 0.9805 | 0.0586 |
| OR5AN1     | 1.0115 | 1.1184 | 0.8993 | 0.8928 | 0.9805 | 0.0534 |
| C4orf40    | 0.9144 | 1.0239 | 1.0582 | 0.9254 | 0.9805 | 0.0357 |
| SPNS3      | 0.8506 | 1.0457 | 1.0474 | 0.9783 | 0.9805 | 0.0462 |
| LOC645277  | 0.9481 | 1.0842 | 1.0589 | 0.8308 | 0.9805 | 0.0580 |
| ENPP2      | 0.9507 | 1.0340 | 1.0117 | 0.9256 | 0.9805 | 0.0254 |
| DSC1       | 0.8801 | 1.1184 | 1.0731 | 0.8504 | 0.9805 | 0.0674 |
| KIR2DL5A   | 0.9595 | 1.0414 | 1.0001 | 0.9210 | 0.9805 | 0.0259 |
| C17orf62   | 0.9490 | 1.2640 | 0.9422 | 0.7668 | 0.9805 | 0.1035 |
| NDRG4      | 0.9398 | 1.0362 | 1.0338 | 0.9123 | 0.9805 | 0.0319 |
| PDGFRA     | 0.9910 | 0.9940 | 0.9886 | 0.9486 | 0.9805 | 0.0107 |
| SOCS1      | 0.9253 | 1.1107 | 1.0342 | 0.8518 | 0.9805 | 0.0573 |
| RASSF3     | 0.6499 | 1.3324 | 1.0715 | 0.8683 | 0.9805 | 0.1455 |
| TRAF4      | 0.9288 | 1.2111 | 0.9975 | 0.7847 | 0.9805 | 0.0887 |
| LOC389857  | 1.0405 | 1.0659 | 0.8927 | 0.9231 | 0.9805 | 0.0427 |
| CXCR5      | 0.9214 | 1.1004 | 1.0012 | 0.8991 | 0.9805 | 0.0456 |
| LOC642168  | 0.9129 | 0.9983 | 1.0624 | 0.9485 | 0.9805 | 0.0324 |
| NT5DC3     | 0.7421 | 1.4766 | 0.9919 | 0.7115 | 0.9805 | 0.1769 |
| ADAMTSL1   | 0.9462 | 1.0652 | 1.0395 | 0.8713 | 0.9805 | 0.0445 |
| KGFLP2     | 0.7899 | 1.0130 | 1.1503 | 0.9690 | 0.9805 | 0.0743 |
| KIF2B      | 0.8562 | 1.0672 | 1.0266 | 0.9723 | 0.9805 | 0.0458 |
| LAMC3      | 1.0418 | 1.0470 | 0.9924 | 0.8410 | 0.9805 | 0.0481 |
| ZNF682     | 0.8241 | 1.2859 | 1.0266 | 0.7856 | 0.9805 | 0.1147 |
| LOC643201  | 0.8873 | 1.0659 | 1.0277 | 0.9412 | 0.9806 | 0.0406 |
| HIST1H2BB  | 0.9423 | 1.1305 | 0.9652 | 0.8842 | 0.9806 | 0.0528 |
| LOC1001341 | 0.9234 | 1.1286 | 1.0300 | 0.8403 | 0.9806 | 0.0628 |
| SNORD22    | 0.9104 | 1.0631 | 0.9845 | 0.9643 | 0.9806 | 0.0316 |
| LOC401072  | 0.9578 | 1.0679 | 0.9954 | 0.9011 | 0.9806 | 0.0350 |
| LOC283523  | 0.9720 | 1.0699 | 0.9893 | 0.8911 | 0.9806 | 0.0367 |
| LOC643441  | 0.9539 | 1.1065 | 0.9727 | 0.8892 | 0.9806 | 0.0456 |
| PDE11A     | 0.9344 | 1.0434 | 1.0439 | 0.9007 | 0.9806 | 0.0371 |
| NIPAL2     | 0.9375 | 1.1467 | 0.9969 | 0.8413 | 0.9806 | 0.0640 |
| LOC642859  | 0.9920 | 1.0504 | 0.9553 | 0.9247 | 0.9806 | 0.0270 |
| FXVD4      | 0.9031 | 1.0598 | 1.0002 | 0.9592 | 0.9806 | 0.0330 |
| MIR92A2    | 0.9403 | 1.0486 | 1.0639 | 0.8696 | 0.9806 | 0.0461 |
| RNF148     | 0.9389 | 1.1163 | 0.8758 | 0.9914 | 0.9806 | 0.0510 |
| OR8G5      | 0.9586 | 1.0927 | 1.0538 | 0.8172 | 0.9806 | 0.0613 |
| LOC390372  | 0.9979 | 1.1538 | 0.9139 | 0.8568 | 0.9806 | 0.0646 |
| LOC644968  | 1.0018 | 1.0031 | 1.1251 | 0.7925 | 0.9806 | 0.0691 |
| C6orf156   | 0.9860 | 1.0711 | 1.0665 | 0.7989 | 0.9806 | 0.0636 |

|            |        |        |        |        |        |        |
|------------|--------|--------|--------|--------|--------|--------|
| LOC727818  | 0.7890 | 1.1066 | 1.2513 | 0.7755 | 0.9806 | 0.1183 |
| HARS       | 0.8923 | 1.4028 | 0.9563 | 0.6711 | 0.9806 | 0.1534 |
| LOC1001296 | 1.0558 | 1.0603 | 0.9939 | 0.8125 | 0.9806 | 0.0580 |
| TMEM213    | 0.8783 | 1.0311 | 1.0281 | 0.9850 | 0.9806 | 0.0357 |
| FABP12     | 0.9457 | 1.0270 | 1.0219 | 0.9279 | 0.9806 | 0.0256 |
| RC3H1      | 0.8866 | 1.1259 | 1.1638 | 0.7462 | 0.9806 | 0.0993 |
| LOC643210  | 0.8374 | 1.2196 | 0.9612 | 0.9044 | 0.9806 | 0.0836 |
| GPR119     | 1.0240 | 0.9254 | 1.0450 | 0.9283 | 0.9806 | 0.0314 |
| KBTBD9     | 0.8985 | 1.1690 | 0.9638 | 0.8914 | 0.9807 | 0.0649 |
| KCNG2      | 0.9919 | 0.9928 | 0.9910 | 0.9469 | 0.9807 | 0.0113 |
| BMPR1A     | 1.0303 | 1.2358 | 0.9166 | 0.7399 | 0.9807 | 0.1039 |
| ANXA3      | 0.9884 | 1.0654 | 1.0178 | 0.8510 | 0.9807 | 0.0460 |
| LOC649941  | 0.9954 | 1.0104 | 1.0004 | 0.9164 | 0.9807 | 0.0217 |
| C5orf48    | 0.8984 | 1.0631 | 1.0058 | 0.9554 | 0.9807 | 0.0352 |
| GABRR1     | 1.0090 | 0.9488 | 0.9953 | 0.9695 | 0.9807 | 0.0134 |
| LOC647323  | 1.0229 | 0.9083 | 1.0122 | 0.9793 | 0.9807 | 0.0258 |
| MIR559     | 0.9596 | 1.0456 | 1.0163 | 0.9011 | 0.9807 | 0.0320 |
| GPR65      | 1.0052 | 1.0654 | 0.9382 | 0.9138 | 0.9807 | 0.0342 |
| LOC1001285 | 0.8379 | 1.2775 | 0.9469 | 0.8604 | 0.9807 | 0.1017 |
| PPAP2C     | 0.9826 | 1.2846 | 0.9227 | 0.7328 | 0.9807 | 0.1145 |
| FAM48B2    | 0.9232 | 1.0774 | 1.0110 | 0.9111 | 0.9807 | 0.0392 |
| BMP7       | 0.9235 | 1.1249 | 0.9974 | 0.8770 | 0.9807 | 0.0541 |
| LOC731656  | 0.9506 | 1.0610 | 1.0451 | 0.8659 | 0.9807 | 0.0454 |
| LOC1001337 | 0.9128 | 1.1240 | 1.0194 | 0.8665 | 0.9807 | 0.0575 |
| FLJ33387   | 0.9249 | 1.0693 | 1.1108 | 0.8178 | 0.9807 | 0.0674 |
| TMEM150A   | 0.9149 | 1.3095 | 0.9328 | 0.7656 | 0.9807 | 0.1158 |
| ELMO1      | 0.9702 | 1.0780 | 0.9813 | 0.8933 | 0.9807 | 0.0379 |
| GSTA2      | 1.0024 | 1.0746 | 0.9176 | 0.9282 | 0.9807 | 0.0365 |
| LOC644322  | 0.9396 | 1.1083 | 1.0355 | 0.8394 | 0.9807 | 0.0584 |
| LOC653073  | 0.9606 | 1.0221 | 1.0125 | 0.9277 | 0.9807 | 0.0222 |
| SPATA7     | 0.8867 | 1.1996 | 1.0317 | 0.8049 | 0.9807 | 0.0867 |
| LOC1001324 | 0.9498 | 1.0962 | 0.9914 | 0.8856 | 0.9807 | 0.0442 |
| TRIM63     | 0.9734 | 1.0235 | 1.0267 | 0.8993 | 0.9807 | 0.0298 |
| CTAG1B     | 0.9342 | 1.0697 | 1.0235 | 0.8955 | 0.9807 | 0.0400 |
| LOC644950  | 0.7610 | 1.1766 | 1.0462 | 0.9392 | 0.9807 | 0.0879 |
| LOC651848  | 0.9306 | 1.1256 | 0.9730 | 0.8938 | 0.9807 | 0.0509 |
| S100A9     | 1.0848 | 1.0126 | 1.0095 | 0.8161 | 0.9808 | 0.0576 |
| LOC651285  | 0.9544 | 1.0877 | 0.9954 | 0.8855 | 0.9808 | 0.0422 |
| LOC1001345 | 0.9664 | 1.0897 | 1.0129 | 0.8541 | 0.9808 | 0.0493 |
| TESSP5     | 0.8581 | 1.0646 | 1.1290 | 0.8712 | 0.9808 | 0.0683 |
| LOC652291  | 0.8966 | 1.1242 | 1.0043 | 0.8979 | 0.9808 | 0.0541 |
| CSDE1      | 0.6935 | 1.4447 | 1.0326 | 0.7523 | 0.9808 | 0.1714 |
| LOC1001305 | 0.9526 | 1.0764 | 1.0234 | 0.8708 | 0.9808 | 0.0446 |
| C15orf49   | 1.0386 | 1.0614 | 1.0372 | 0.7859 | 0.9808 | 0.0652 |
| LOC651763  | 1.0433 | 0.9987 | 0.9704 | 0.9107 | 0.9808 | 0.0278 |
| LOC1001348 | 0.9174 | 1.0922 | 0.9965 | 0.9171 | 0.9808 | 0.0416 |

|            |        |        |        |        |        |        |
|------------|--------|--------|--------|--------|--------|--------|
| PRAMEF18   | 1.0870 | 1.0865 | 0.9951 | 0.7546 | 0.9808 | 0.0784 |
| LOC349196  | 0.8650 | 1.1201 | 1.0260 | 0.9121 | 0.9808 | 0.0574 |
| LOC391322  | 1.0016 | 1.0658 | 1.0637 | 0.7922 | 0.9808 | 0.0646 |
| FAM83A     | 0.9676 | 0.9938 | 1.0511 | 0.9107 | 0.9808 | 0.0292 |
| LOC441196  | 0.9297 | 1.0498 | 1.0021 | 0.9417 | 0.9808 | 0.0279 |
| FLJ46380   | 0.8904 | 1.1882 | 1.0129 | 0.8319 | 0.9808 | 0.0787 |
| KRTAP19-2  | 0.9543 | 1.0713 | 1.0228 | 0.8749 | 0.9808 | 0.0427 |
| LOC727747  | 0.8887 | 1.1849 | 0.9974 | 0.8523 | 0.9808 | 0.0747 |
| MIR488     | 0.7615 | 1.1546 | 1.1851 | 0.8221 | 0.9808 | 0.1100 |
| LOC728127  | 0.8693 | 1.1391 | 1.0756 | 0.8394 | 0.9809 | 0.0744 |
| PROSC      | 0.7805 | 1.3683 | 0.9383 | 0.8363 | 0.9809 | 0.1332 |
| MIR563     | 1.0240 | 1.0733 | 0.9063 | 0.9199 | 0.9809 | 0.0405 |
| C1orf222   | 0.9075 | 1.1025 | 0.9821 | 0.9314 | 0.9809 | 0.0434 |
| CT47A1     | 0.9502 | 1.0609 | 1.0359 | 0.8765 | 0.9809 | 0.0421 |
| PATL2      | 0.9639 | 1.0698 | 0.9661 | 0.9237 | 0.9809 | 0.0312 |
| CAST       | 0.9258 | 1.1339 | 1.0777 | 0.7861 | 0.9809 | 0.0784 |
| PARD6B     | 0.9511 | 0.9349 | 1.1283 | 0.9092 | 0.9809 | 0.0499 |
| C4orf49    | 0.9864 | 1.1067 | 0.9691 | 0.8613 | 0.9809 | 0.0503 |
| LOC728653  | 1.0801 | 1.0778 | 0.8910 | 0.8747 | 0.9809 | 0.0567 |
| LOC647588  | 0.9188 | 1.1665 | 0.9091 | 0.9292 | 0.9809 | 0.0620 |
| CSPG4      | 0.9204 | 1.1159 | 1.0560 | 0.8313 | 0.9809 | 0.0645 |
| LOC1001292 | 0.9425 | 0.9792 | 1.0416 | 0.9603 | 0.9809 | 0.0216 |
| LOC389316  | 0.8514 | 1.0995 | 0.9398 | 1.0329 | 0.9809 | 0.0542 |
| VPS13B     | 0.9439 | 1.0675 | 1.0103 | 0.9019 | 0.9809 | 0.0365 |
| AGPAT1     | 0.9276 | 1.1931 | 1.0136 | 0.7893 | 0.9809 | 0.0845 |
| B3GAT2     | 0.9415 | 1.0746 | 0.9715 | 0.9361 | 0.9809 | 0.0322 |
| BACE2      | 0.9445 | 1.0735 | 0.9610 | 0.9446 | 0.9809 | 0.0311 |
| TTTY9B     | 0.9461 | 1.1042 | 0.9788 | 0.8946 | 0.9809 | 0.0446 |
| TRIM22     | 0.8697 | 1.1393 | 0.9885 | 0.9262 | 0.9809 | 0.0581 |
| LOC1001327 | 0.9256 | 1.1580 | 0.9886 | 0.8516 | 0.9809 | 0.0653 |
| LOC643824  | 0.8570 | 1.1689 | 0.9476 | 0.9503 | 0.9809 | 0.0663 |
| GZMM       | 0.9685 | 0.9670 | 1.0402 | 0.9480 | 0.9809 | 0.0203 |
| CYP4B1     | 0.9458 | 1.0406 | 0.9928 | 0.9446 | 0.9809 | 0.0228 |
| FBXL18     | 0.8844 | 1.3234 | 0.9378 | 0.7782 | 0.9809 | 0.1189 |
| TCTEX1D4   | 0.9673 | 0.9963 | 0.9866 | 0.9736 | 0.9809 | 0.0065 |
| LOC1001285 | 0.9918 | 1.0272 | 0.9983 | 0.9066 | 0.9810 | 0.0260 |
| TCEAL5     | 0.9300 | 1.1826 | 0.9834 | 0.8277 | 0.9810 | 0.0746 |
| SYT12      | 0.9163 | 1.0659 | 0.9820 | 0.9597 | 0.9810 | 0.0314 |
| USH1G      | 0.8698 | 1.0468 | 1.1660 | 0.8412 | 0.9810 | 0.0766 |
| NAGS       | 0.9390 | 1.1525 | 0.9601 | 0.8722 | 0.9810 | 0.0602 |
| LOC442454  | 0.7722 | 1.2430 | 1.2785 | 0.6301 | 0.9810 | 0.1643 |
| GCKR       | 0.8468 | 1.0422 | 1.0759 | 0.9591 | 0.9810 | 0.0510 |
| LOC731992  | 0.9683 | 1.0349 | 0.9824 | 0.9384 | 0.9810 | 0.0202 |
| GAD2       | 0.9055 | 1.0902 | 1.0029 | 0.9253 | 0.9810 | 0.0420 |
| LOC649091  | 0.8614 | 1.0186 | 1.0232 | 1.0208 | 0.9810 | 0.0399 |
| RPP14      | 0.9544 | 1.1688 | 1.0005 | 0.8002 | 0.9810 | 0.0759 |

|            |        |        |        |        |        |        |
|------------|--------|--------|--------|--------|--------|--------|
| ZNF354C    | 0.9699 | 1.0980 | 0.9740 | 0.8820 | 0.9810 | 0.0444 |
| TSLP       | 0.9088 | 1.0246 | 1.1117 | 0.8790 | 0.9810 | 0.0537 |
| RSAD2      | 0.9301 | 1.1171 | 1.0819 | 0.7950 | 0.9810 | 0.0741 |
| LOC650968  | 0.8949 | 1.1406 | 0.9906 | 0.8979 | 0.9810 | 0.0577 |
| POGZ       | 0.9397 | 1.1109 | 1.0192 | 0.8542 | 0.9810 | 0.0549 |
| LOC729960  | 0.9225 | 1.0822 | 1.0186 | 0.9007 | 0.9810 | 0.0424 |
| FLJ37644   | 0.9132 | 1.0213 | 1.0389 | 0.9506 | 0.9810 | 0.0296 |
| LOC651732  | 0.9226 | 0.9611 | 1.0912 | 0.9491 | 0.9810 | 0.0376 |
| MFRP       | 0.9247 | 1.1023 | 1.0582 | 0.8389 | 0.9810 | 0.0606 |
| TMPRSS11D  | 0.8897 | 1.0783 | 1.0475 | 0.9086 | 0.9810 | 0.0478 |
| LOC642902  | 0.9168 | 1.0856 | 1.0500 | 0.8716 | 0.9810 | 0.0515 |
| TBX2       | 0.8978 | 1.1460 | 0.9865 | 0.8937 | 0.9810 | 0.0590 |
| LRTM1      | 0.9492 | 1.0310 | 1.0768 | 0.8671 | 0.9810 | 0.0462 |
| CNGB1      | 0.8848 | 1.1030 | 1.0681 | 0.8681 | 0.9810 | 0.0609 |
| ENTPD2     | 0.9038 | 1.1580 | 0.9745 | 0.8878 | 0.9810 | 0.0619 |
| OR5T3      | 0.9381 | 1.0286 | 1.0452 | 0.9122 | 0.9810 | 0.0329 |
| C15orf27   | 0.8561 | 1.1222 | 0.9665 | 0.9793 | 0.9810 | 0.0546 |
| ZACN       | 0.8825 | 1.1460 | 0.9595 | 0.9362 | 0.9810 | 0.0573 |
| LOC1002332 | 1.0287 | 1.1036 | 1.0147 | 0.7772 | 0.9810 | 0.0707 |
| SH2D1B     | 1.0569 | 1.0106 | 1.0158 | 0.8407 | 0.9810 | 0.0479 |
| LOC643140  | 0.9551 | 1.1405 | 0.9870 | 0.8415 | 0.9810 | 0.0617 |
| C9orf130   | 0.9298 | 1.1389 | 0.9798 | 0.8757 | 0.9811 | 0.0568 |
| MICAL3     | 0.8771 | 1.1290 | 1.0141 | 0.9040 | 0.9811 | 0.0575 |
| DNAH10     | 0.9384 | 1.0367 | 1.0983 | 0.8509 | 0.9811 | 0.0545 |
| OTOP2      | 0.9693 | 1.0283 | 0.9629 | 0.9638 | 0.9811 | 0.0158 |
| EGLN3      | 0.8439 | 1.1569 | 1.0098 | 0.9136 | 0.9811 | 0.0678 |
| TGFBI      | 1.0046 | 1.0941 | 1.0202 | 0.8053 | 0.9811 | 0.0618 |
| CYP2D7P1   | 0.9432 | 1.1054 | 0.9605 | 0.9152 | 0.9811 | 0.0425 |
| CCIN       | 0.9041 | 1.1494 | 0.9611 | 0.9097 | 0.9811 | 0.0575 |
| LOC728855  | 0.9724 | 1.2508 | 1.0033 | 0.6978 | 0.9811 | 0.1131 |
| LOC653210  | 0.9512 | 1.0467 | 1.0221 | 0.9044 | 0.9811 | 0.0326 |
| TUBB1      | 0.9452 | 1.1456 | 1.0089 | 0.8245 | 0.9811 | 0.0669 |
| LOC1001318 | 0.9953 | 1.0376 | 1.0192 | 0.8722 | 0.9811 | 0.0373 |
| GNAZ       | 0.9176 | 1.1080 | 0.9932 | 0.9056 | 0.9811 | 0.0465 |
| LOC647988  | 0.9282 | 1.1468 | 0.9975 | 0.8519 | 0.9811 | 0.0627 |
| SNORD108   | 0.8709 | 1.0781 | 0.9907 | 0.9846 | 0.9811 | 0.0425 |
| SLITRK4    | 0.9821 | 0.9604 | 1.0206 | 0.9612 | 0.9811 | 0.0141 |
| C18orf22   | 0.8891 | 1.2450 | 1.0849 | 0.7053 | 0.9811 | 0.1172 |
| LOC1001284 | 0.8689 | 1.0103 | 1.0770 | 0.9682 | 0.9811 | 0.0436 |
| TRMT2B     | 0.8213 | 1.2049 | 1.0303 | 0.8679 | 0.9811 | 0.0870 |
| LOC1001302 | 0.9507 | 1.0319 | 1.0240 | 0.9178 | 0.9811 | 0.0279 |
| C15orf5    | 0.9880 | 1.0643 | 1.0567 | 0.8154 | 0.9811 | 0.0578 |
| LOC647891  | 0.9156 | 1.0868 | 1.0147 | 0.9073 | 0.9811 | 0.0429 |
| EVI2B      | 1.0301 | 1.0804 | 0.9288 | 0.8851 | 0.9811 | 0.0449 |
| LOC731548  | 0.9809 | 1.0267 | 1.0328 | 0.8841 | 0.9811 | 0.0344 |
| MIR200A    | 0.9237 | 1.0233 | 1.0003 | 0.9772 | 0.9811 | 0.0213 |

|            |        |        |        |        |        |        |
|------------|--------|--------|--------|--------|--------|--------|
| LOC646448  | 0.9149 | 1.1106 | 1.0254 | 0.8736 | 0.9811 | 0.0538 |
| PREX2      | 0.9328 | 1.0900 | 0.9998 | 0.9019 | 0.9811 | 0.0417 |
| C4orf7     | 1.0296 | 0.9751 | 0.9983 | 0.9215 | 0.9811 | 0.0228 |
| RNF141     | 0.9156 | 1.1495 | 0.9969 | 0.8625 | 0.9811 | 0.0626 |
| TUBAL3     | 0.9599 | 1.0948 | 0.9897 | 0.8801 | 0.9811 | 0.0444 |
| GAPT       | 0.8758 | 1.0923 | 0.9977 | 0.9587 | 0.9811 | 0.0449 |
| LOH3CR2A   | 1.0400 | 1.0647 | 0.9437 | 0.8760 | 0.9811 | 0.0437 |
| LOC645336  | 0.8589 | 1.0901 | 1.0603 | 0.9152 | 0.9811 | 0.0559 |
| TRIM33     | 0.8670 | 1.2918 | 0.9338 | 0.8319 | 0.9811 | 0.1057 |
| OR4A47     | 0.8632 | 1.0903 | 1.0820 | 0.8890 | 0.9811 | 0.0609 |
| C1orf68    | 0.8668 | 1.0779 | 1.0681 | 0.9118 | 0.9811 | 0.0539 |
| C1orf141   | 0.9227 | 1.0706 | 0.9908 | 0.9404 | 0.9811 | 0.0331 |
| SNCB       | 0.9390 | 1.0820 | 0.9905 | 0.9131 | 0.9811 | 0.0373 |
| AFG3L1     | 0.9001 | 1.1166 | 0.9894 | 0.9184 | 0.9811 | 0.0491 |
| KRTAP9-4   | 0.9764 | 1.0391 | 0.9831 | 0.9260 | 0.9812 | 0.0231 |
| C20orf160  | 0.9177 | 1.1237 | 0.9826 | 0.9006 | 0.9812 | 0.0507 |
| LOC1001307 | 0.8656 | 1.0888 | 0.9578 | 1.0126 | 0.9812 | 0.0470 |
| FLJ43681   | 0.7933 | 1.1234 | 1.4783 | 0.5296 | 0.9812 | 0.2055 |
| LOC651965  | 1.0646 | 1.0037 | 0.9172 | 0.9392 | 0.9812 | 0.0333 |
| MLN        | 0.8896 | 1.0241 | 1.0060 | 1.0050 | 0.9812 | 0.0309 |
| SESN2      | 0.8826 | 1.3767 | 0.8362 | 0.8293 | 0.9812 | 0.1324 |
| LOC1001285 | 0.9065 | 1.1094 | 1.0473 | 0.8615 | 0.9812 | 0.0583 |
| LOC642635  | 0.9321 | 1.1230 | 1.0037 | 0.8659 | 0.9812 | 0.0550 |
| LOC391703  | 0.9620 | 1.0326 | 1.0866 | 0.8436 | 0.9812 | 0.0525 |
| TRIM58     | 1.0531 | 1.0184 | 0.9584 | 0.8950 | 0.9812 | 0.0348 |
| C3orf17    | 0.9327 | 1.1007 | 1.0063 | 0.8851 | 0.9812 | 0.0470 |
| MAPK8IP3   | 1.0216 | 1.0700 | 0.9238 | 0.9094 | 0.9812 | 0.0387 |
| C12orf68   | 0.8296 | 1.1784 | 1.0032 | 0.9136 | 0.9812 | 0.0747 |
| LOC641835  | 0.8852 | 1.0284 | 1.0084 | 1.0030 | 0.9812 | 0.0325 |
| MIR597     | 0.9245 | 1.0868 | 0.9823 | 0.9313 | 0.9812 | 0.0375 |
| OR5T2      | 0.9419 | 1.0444 | 0.9635 | 0.9750 | 0.9812 | 0.0221 |
| KCNK6      | 1.0070 | 1.0459 | 0.9856 | 0.8865 | 0.9812 | 0.0340 |
| NDUFA3     | 0.8878 | 1.1807 | 1.0503 | 0.8062 | 0.9812 | 0.0836 |
| LOC652814  | 0.8786 | 0.9793 | 1.0679 | 0.9992 | 0.9812 | 0.0391 |
| PPAPDC3    | 0.9122 | 1.0498 | 0.9946 | 0.9683 | 0.9812 | 0.0286 |
| LOC651075  | 0.9070 | 1.1369 | 0.9711 | 0.9100 | 0.9812 | 0.0539 |
| TBX4       | 0.9108 | 1.0361 | 1.0686 | 0.9094 | 0.9812 | 0.0416 |
| LOC653468  | 0.9799 | 1.0460 | 0.9854 | 0.9137 | 0.9812 | 0.0270 |
| PTGS2      | 0.9810 | 1.0955 | 0.9231 | 0.9254 | 0.9812 | 0.0404 |
| CHD7       | 0.8106 | 1.1685 | 1.0577 | 0.8882 | 0.9813 | 0.0810 |
| LOC441171  | 1.0044 | 1.1314 | 0.9432 | 0.8461 | 0.9813 | 0.0597 |
| NRXN3      | 0.9101 | 1.0964 | 1.0044 | 0.9142 | 0.9813 | 0.0441 |
| GGCX       | 0.8747 | 1.1707 | 1.0872 | 0.7925 | 0.9813 | 0.0885 |
| C10orf136  | 0.8626 | 1.1445 | 0.9921 | 0.9259 | 0.9813 | 0.0605 |
| LOC653737  | 0.8265 | 1.1356 | 1.2711 | 0.6919 | 0.9813 | 0.1340 |
| ADPRH      | 0.8516 | 1.1810 | 1.0021 | 0.8904 | 0.9813 | 0.0738 |

|            |        |        |        |        |        |        |
|------------|--------|--------|--------|--------|--------|--------|
| LOC1001332 | 1.0153 | 0.9744 | 1.0714 | 0.8640 | 0.9813 | 0.0439 |
| HSPB6      | 0.9778 | 1.0721 | 0.9482 | 0.9271 | 0.9813 | 0.0320 |
| LOC1001328 | 0.9147 | 1.1410 | 0.9473 | 0.9222 | 0.9813 | 0.0537 |
| LOC643363  | 1.0479 | 1.0544 | 0.8899 | 0.9330 | 0.9813 | 0.0413 |
| C1orf127   | 0.9605 | 1.0998 | 0.9384 | 0.9265 | 0.9813 | 0.0401 |
| TPPP3      | 0.9129 | 1.0914 | 1.0400 | 0.8810 | 0.9813 | 0.0502 |
| SKIV2L     | 0.9421 | 1.2019 | 1.0320 | 0.7492 | 0.9813 | 0.0943 |
| CYP2D6     | 1.0003 | 1.0730 | 0.9747 | 0.8772 | 0.9813 | 0.0405 |
| LOC1001316 | 1.0462 | 1.0259 | 0.9947 | 0.8585 | 0.9813 | 0.0423 |
| LOC1001305 | 0.9307 | 1.0763 | 0.9441 | 0.9742 | 0.9813 | 0.0329 |
| TYW1B      | 0.8534 | 1.3226 | 0.9561 | 0.7933 | 0.9813 | 0.1186 |
| COL8A2     | 0.9132 | 1.1594 | 0.9790 | 0.8737 | 0.9813 | 0.0632 |
| WIZ        | 1.0236 | 1.2332 | 0.8176 | 0.8509 | 0.9813 | 0.0953 |
| CCNB1IP1   | 0.8593 | 1.4414 | 0.9127 | 0.7118 | 0.9813 | 0.1591 |
| LOC646970  | 0.9277 | 1.0936 | 1.0932 | 0.8108 | 0.9813 | 0.0690 |
| MIR1247    | 0.9429 | 1.0686 | 0.9275 | 0.9863 | 0.9813 | 0.0316 |
| LOC653280  | 1.0019 | 1.1444 | 0.9413 | 0.8378 | 0.9813 | 0.0640 |
| MCCD1      | 0.9223 | 1.1684 | 0.9320 | 0.9027 | 0.9813 | 0.0626 |
| GRPR       | 0.9457 | 1.1149 | 1.0015 | 0.8633 | 0.9813 | 0.0528 |
| LOC650747  | 0.7794 | 1.1651 | 1.0875 | 0.8934 | 0.9813 | 0.0883 |
| LOC652630  | 0.8974 | 1.1781 | 1.0379 | 0.8120 | 0.9814 | 0.0804 |
| FAM9B      | 0.9503 | 1.1054 | 0.9415 | 0.9282 | 0.9814 | 0.0416 |
| ABCC6P1    | 0.9554 | 1.0631 | 1.0222 | 0.8847 | 0.9814 | 0.0391 |
| KIAA1826   | 0.8273 | 1.3326 | 1.0043 | 0.7613 | 0.9814 | 0.1278 |
| LOC728597  | 0.8894 | 1.1162 | 0.9933 | 0.9265 | 0.9814 | 0.0498 |
| LOC389124  | 1.0222 | 1.1422 | 0.9102 | 0.8509 | 0.9814 | 0.0643 |
| LOC730242  | 0.9623 | 1.1229 | 0.9154 | 0.9250 | 0.9814 | 0.0482 |
| LOC646881  | 0.9776 | 1.0352 | 1.0829 | 0.8299 | 0.9814 | 0.0549 |
| TMCO3      | 0.8962 | 1.3683 | 0.8737 | 0.7874 | 0.9814 | 0.1311 |
| LOC731779  | 0.8387 | 1.0958 | 1.1638 | 0.8272 | 0.9814 | 0.0868 |
| C1orf126   | 0.8853 | 1.0236 | 1.0171 | 0.9996 | 0.9814 | 0.0324 |
| RAP1B      | 0.8983 | 1.0802 | 1.0458 | 0.9013 | 0.9814 | 0.0476 |
| LOC641858  | 0.9507 | 1.0550 | 1.0382 | 0.8817 | 0.9814 | 0.0403 |
| LOC653789  | 0.8949 | 1.0329 | 1.0817 | 0.9163 | 0.9814 | 0.0451 |
| SERINC4    | 0.8879 | 1.0067 | 1.0923 | 0.9387 | 0.9814 | 0.0443 |
| LOC1001289 | 0.9919 | 1.0969 | 0.9191 | 0.9178 | 0.9814 | 0.0422 |
| C20orf11   | 0.9013 | 1.3211 | 0.9386 | 0.7647 | 0.9814 | 0.1192 |
| LOC649352  | 0.9792 | 1.0690 | 0.9711 | 0.9063 | 0.9814 | 0.0335 |
| LOC1001320 | 0.8742 | 1.0128 | 1.0134 | 1.0253 | 0.9814 | 0.0358 |
| POPDC3     | 0.9335 | 1.0292 | 1.0378 | 0.9251 | 0.9814 | 0.0302 |
| LOC1001307 | 0.8928 | 0.9859 | 1.0395 | 1.0075 | 0.9814 | 0.0315 |
| G6PC       | 0.8419 | 1.1092 | 1.0844 | 0.8902 | 0.9814 | 0.0675 |
| LOC728185  | 0.9225 | 1.1369 | 0.9657 | 0.9005 | 0.9814 | 0.0536 |
| GTSF1      | 0.9102 | 1.1571 | 0.8670 | 0.9913 | 0.9814 | 0.0640 |
| ASH2L      | 0.8908 | 1.4415 | 0.9327 | 0.6608 | 0.9814 | 0.1646 |
| C20orf77   | 0.9757 | 1.0902 | 1.0079 | 0.8518 | 0.9814 | 0.0495 |



|            |        |        |        |        |        |        |
|------------|--------|--------|--------|--------|--------|--------|
| LOC646734  | 0.9655 | 0.9967 | 1.0772 | 0.8864 | 0.9814 | 0.0395 |
| TMEM171    | 0.9303 | 1.0651 | 0.9489 | 0.9815 | 0.9814 | 0.0298 |
| LOC400174  | 0.8612 | 1.2037 | 0.9511 | 0.9098 | 0.9815 | 0.0763 |
| ZSCAN10    | 0.9868 | 1.0781 | 1.0074 | 0.8535 | 0.9815 | 0.0469 |
| MYL1       | 0.9157 | 1.0994 | 0.9952 | 0.9157 | 0.9815 | 0.0435 |
| LOC651675  | 0.9628 | 0.9893 | 1.0348 | 0.9389 | 0.9815 | 0.0205 |
| LOC649944  | 0.9281 | 0.9927 | 1.1060 | 0.8992 | 0.9815 | 0.0459 |
| LOC1001295 | 1.0043 | 1.0637 | 1.0272 | 0.8307 | 0.9815 | 0.0517 |
| CYP26C1    | 0.9088 | 1.1151 | 0.9701 | 0.9319 | 0.9815 | 0.0463 |
| LOC1001329 | 0.9171 | 1.1076 | 0.9707 | 0.9306 | 0.9815 | 0.0435 |
| VWDE       | 0.9124 | 1.0356 | 1.1090 | 0.8690 | 0.9815 | 0.0552 |
| QPCT       | 1.0164 | 1.0163 | 1.0439 | 0.8493 | 0.9815 | 0.0445 |
| LOC646665  | 0.9693 | 1.0360 | 1.0177 | 0.9031 | 0.9815 | 0.0297 |
| PDE6C      | 0.8858 | 1.0614 | 1.0321 | 0.9467 | 0.9815 | 0.0401 |
| ZSCAN29    | 0.9364 | 1.0929 | 1.0788 | 0.8179 | 0.9815 | 0.0650 |
| UGT1A8     | 0.9349 | 1.1012 | 1.0401 | 0.8497 | 0.9815 | 0.0558 |
| TTC36      | 0.9675 | 0.9797 | 1.0897 | 0.8892 | 0.9815 | 0.0413 |
| P2RX1      | 0.8519 | 1.1568 | 0.9852 | 0.9321 | 0.9815 | 0.0645 |
| MAPK9      | 0.9311 | 1.3215 | 0.9320 | 0.7414 | 0.9815 | 0.1219 |
| LOC729995  | 0.9893 | 1.0867 | 0.9612 | 0.8889 | 0.9815 | 0.0409 |
| LY6G6C     | 0.9531 | 1.0430 | 1.0448 | 0.8852 | 0.9815 | 0.0386 |
| ZNF549     | 0.6906 | 1.3552 | 1.0123 | 0.8679 | 0.9815 | 0.1409 |
| SOAT2      | 0.8212 | 1.1800 | 1.0117 | 0.9132 | 0.9815 | 0.0767 |
| LOC150577  | 0.9773 | 1.0358 | 1.0809 | 0.8321 | 0.9815 | 0.0541 |
| CPZ        | 0.9194 | 1.0556 | 1.0145 | 0.9366 | 0.9815 | 0.0322 |
| PISRT1     | 0.9574 | 1.0485 | 0.9865 | 0.9337 | 0.9815 | 0.0248 |
| SNORA80    | 0.7509 | 1.3144 | 1.0290 | 0.8319 | 0.9815 | 0.1254 |
| OR10R2     | 0.9767 | 1.0609 | 0.9977 | 0.8908 | 0.9815 | 0.0351 |
| LOC387686  | 0.9103 | 1.1660 | 1.0310 | 0.8189 | 0.9815 | 0.0753 |
| LOC1001338 | 1.0369 | 1.0415 | 0.8897 | 0.9581 | 0.9816 | 0.0361 |
| TCL1A      | 0.9614 | 1.0125 | 0.9893 | 0.9630 | 0.9816 | 0.0121 |
| TSSK1B     | 0.9118 | 1.0742 | 1.1004 | 0.8397 | 0.9816 | 0.0631 |
| SRGAP2     | 0.9359 | 1.2315 | 0.8918 | 0.8671 | 0.9816 | 0.0845 |
| LOC647568  | 0.8236 | 1.1594 | 1.0849 | 0.8583 | 0.9816 | 0.0829 |
| LOC647251  | 1.0135 | 1.0162 | 1.1000 | 0.7967 | 0.9816 | 0.0648 |
| FOXG1      | 0.9392 | 1.2360 | 0.8341 | 0.9171 | 0.9816 | 0.0878 |
| CES8       | 0.9068 | 0.9975 | 1.0027 | 1.0193 | 0.9816 | 0.0253 |
| KRT8P9     | 0.9429 | 1.1668 | 1.0414 | 0.7753 | 0.9816 | 0.0826 |
| SAG        | 0.9803 | 0.9567 | 1.0067 | 0.9828 | 0.9816 | 0.0102 |
| ABCA13     | 0.8862 | 1.0688 | 1.0545 | 0.9169 | 0.9816 | 0.0467 |
| LOC728046  | 0.8569 | 1.1856 | 0.9529 | 0.9310 | 0.9816 | 0.0710 |
| NDUFS6     | 0.9168 | 1.0802 | 1.0431 | 0.8863 | 0.9816 | 0.0472 |
| LOC391609  | 1.0129 | 1.0421 | 0.9607 | 0.9108 | 0.9816 | 0.0290 |
| LOC1001282 | 0.9193 | 1.1230 | 0.9965 | 0.8877 | 0.9816 | 0.0524 |
| RCBTB2     | 0.9658 | 1.0151 | 1.0459 | 0.8996 | 0.9816 | 0.0319 |
| LOC645558  | 1.0137 | 1.0549 | 0.9878 | 0.8701 | 0.9816 | 0.0396 |

|            |        |        |        |        |        |        |
|------------|--------|--------|--------|--------|--------|--------|
| NDUFA5     | 1.0050 | 1.0410 | 0.9986 | 0.8820 | 0.9816 | 0.0345 |
| LOC647527  | 0.9059 | 1.1663 | 0.9895 | 0.8649 | 0.9816 | 0.0668 |
| LOC256483  | 1.0102 | 1.0439 | 0.9479 | 0.9246 | 0.9816 | 0.0275 |
| LOC728792  | 0.9835 | 1.1078 | 0.9210 | 0.9144 | 0.9816 | 0.0448 |
| NBPF11     | 0.8812 | 1.2042 | 0.9806 | 0.8606 | 0.9816 | 0.0787 |
| LOC392275  | 0.9039 | 1.0346 | 1.0114 | 0.9767 | 0.9816 | 0.0285 |
| ADIPOQ     | 0.9562 | 1.0079 | 0.9700 | 0.9925 | 0.9817 | 0.0115 |
| LOC651820  | 0.9714 | 0.9915 | 1.0250 | 0.9388 | 0.9817 | 0.0181 |
| FLJ40606   | 0.8064 | 1.1033 | 1.1255 | 0.8914 | 0.9817 | 0.0787 |
| LOC652011  | 0.9407 | 1.0468 | 1.0392 | 0.9000 | 0.9817 | 0.0364 |
| CD7        | 0.9661 | 1.0437 | 1.0245 | 0.8923 | 0.9817 | 0.0340 |
| LOC643948  | 1.0167 | 1.0217 | 0.9784 | 0.9099 | 0.9817 | 0.0258 |
| LOC144817  | 0.9882 | 1.0382 | 0.8734 | 1.0269 | 0.9817 | 0.0376 |
| CXCR6      | 1.0176 | 1.0167 | 0.9177 | 0.9748 | 0.9817 | 0.0235 |
| PCDH1      | 0.9944 | 1.1056 | 1.0059 | 0.8209 | 0.9817 | 0.0591 |
| S100A16    | 0.8489 | 1.1175 | 0.9760 | 0.9843 | 0.9817 | 0.0549 |
| FAM90A6P   | 0.9522 | 1.0902 | 0.9560 | 0.9284 | 0.9817 | 0.0367 |
| HRC        | 0.8911 | 1.0962 | 1.0269 | 0.9126 | 0.9817 | 0.0484 |
| L3MBTL3    | 0.9050 | 1.1349 | 1.0848 | 0.8021 | 0.9817 | 0.0776 |
| LOC732111  | 0.8907 | 1.0533 | 1.0035 | 0.9794 | 0.9817 | 0.0340 |
| C9orf53    | 0.9449 | 1.0769 | 1.0222 | 0.8828 | 0.9817 | 0.0426 |
| LTA        | 0.7158 | 1.1820 | 1.1591 | 0.8699 | 0.9817 | 0.1136 |
| NBPF16     | 0.9710 | 0.9960 | 1.0620 | 0.8979 | 0.9817 | 0.0339 |
| ZNF596     | 0.9466 | 0.9891 | 1.1182 | 0.8730 | 0.9817 | 0.0514 |
| FCHO1      | 0.8526 | 1.1647 | 1.0045 | 0.9051 | 0.9817 | 0.0687 |
| ERBB3      | 0.8165 | 1.3828 | 1.0083 | 0.7193 | 0.9817 | 0.1466 |
| LOC1001338 | 1.0189 | 0.9925 | 0.9859 | 0.9297 | 0.9817 | 0.0188 |
| BTF3L1     | 1.0312 | 1.0409 | 0.9661 | 0.8887 | 0.9817 | 0.0352 |
| VAPB       | 0.9111 | 1.0363 | 1.0240 | 0.9554 | 0.9817 | 0.0295 |
| GALNTL1    | 0.9143 | 1.1078 | 1.0693 | 0.8355 | 0.9817 | 0.0642 |
| OR14A16    | 1.0092 | 0.9768 | 1.0124 | 0.9285 | 0.9817 | 0.0195 |
| LOC727896  | 0.9554 | 1.0628 | 1.0354 | 0.8734 | 0.9817 | 0.0427 |
| LOC649557  | 0.9748 | 0.9958 | 1.0710 | 0.8855 | 0.9817 | 0.0382 |
| ANKMY2     | 0.9322 | 1.1776 | 1.0668 | 0.7503 | 0.9817 | 0.0920 |
| MORC4      | 0.9878 | 1.1346 | 0.9046 | 0.8999 | 0.9817 | 0.0548 |
| MGC52498   | 0.9237 | 1.1473 | 0.9154 | 0.9406 | 0.9817 | 0.0554 |
| LOC1001336 | 0.9798 | 1.1523 | 0.9503 | 0.8445 | 0.9817 | 0.0638 |
| LOC647869  | 0.9092 | 1.1677 | 0.9223 | 0.9278 | 0.9817 | 0.0621 |
| ROR1       | 1.0002 | 1.2127 | 0.9306 | 0.7835 | 0.9817 | 0.0893 |
| LOC650517  | 0.9074 | 1.1028 | 1.0363 | 0.8805 | 0.9817 | 0.0527 |
| HNRNPCL1   | 0.9646 | 1.0353 | 1.0229 | 0.9042 | 0.9818 | 0.0301 |
| ZFC3H1     | 0.9189 | 1.1734 | 1.0067 | 0.8280 | 0.9818 | 0.0736 |
| PTK9       | 0.8508 | 1.2442 | 0.9575 | 0.8745 | 0.9818 | 0.0904 |
| OR6Q1      | 0.9869 | 1.0594 | 1.0190 | 0.8617 | 0.9818 | 0.0427 |
| LOC442474  | 0.8452 | 1.1864 | 0.9897 | 0.9057 | 0.9818 | 0.0744 |
| AKNAD1     | 0.8758 | 1.1463 | 1.0074 | 0.8976 | 0.9818 | 0.0619 |

|            |        |        |        |        |        |        |
|------------|--------|--------|--------|--------|--------|--------|
| TNFRSF11B  | 0.9098 | 1.0999 | 1.0602 | 0.8571 | 0.9818 | 0.0583 |
| FLJ11795   | 0.9980 | 1.0302 | 1.0471 | 0.8518 | 0.9818 | 0.0445 |
| LOC729113  | 1.0514 | 0.9140 | 0.9749 | 0.9868 | 0.9818 | 0.0282 |
| LOC642698  | 0.8108 | 1.1614 | 1.0272 | 0.9277 | 0.9818 | 0.0744 |
| ANXA2P1    | 0.9268 | 0.9878 | 1.0875 | 0.9250 | 0.9818 | 0.0381 |
| LOC644408  | 0.9948 | 1.0953 | 0.9933 | 0.8438 | 0.9818 | 0.0518 |
| ASB12      | 0.9408 | 1.0912 | 0.9461 | 0.9490 | 0.9818 | 0.0365 |
| LOC731852  | 0.9015 | 1.1389 | 0.9386 | 0.9482 | 0.9818 | 0.0533 |
| LOC1001285 | 0.9255 | 1.1564 | 0.9212 | 0.9240 | 0.9818 | 0.0582 |
| ZNF709     | 0.9081 | 1.0805 | 1.0334 | 0.9052 | 0.9818 | 0.0444 |
| LOC643432  | 0.9243 | 1.0143 | 1.0437 | 0.9449 | 0.9818 | 0.0282 |
| SGTB       | 0.9866 | 1.0400 | 1.0729 | 0.8277 | 0.9818 | 0.0544 |
| LOC729195  | 0.8594 | 1.0822 | 0.9786 | 1.0071 | 0.9818 | 0.0463 |
| LOC401640  | 0.6672 | 1.1738 | 1.4419 | 0.6444 | 0.9818 | 0.1961 |
| NKX2-1     | 0.9794 | 1.0641 | 0.9976 | 0.8863 | 0.9818 | 0.0367 |
| CACNA1A    | 0.8920 | 1.1046 | 1.0277 | 0.9030 | 0.9818 | 0.0512 |
| C21orf7    | 0.9429 | 1.1371 | 0.9875 | 0.8598 | 0.9818 | 0.0581 |
| LOC254398  | 0.9496 | 1.1137 | 0.9804 | 0.8836 | 0.9818 | 0.0484 |
| LYPD2      | 0.9284 | 1.0408 | 1.0669 | 0.8911 | 0.9818 | 0.0426 |
| MGC46336   | 0.9594 | 1.1401 | 0.9307 | 0.8971 | 0.9818 | 0.0543 |
| LOC642772  | 0.8590 | 1.1514 | 1.0197 | 0.8972 | 0.9818 | 0.0661 |
| ANXA2P3    | 0.8312 | 1.1010 | 1.0050 | 0.9901 | 0.9818 | 0.0559 |
| LOC654010  | 0.9808 | 1.0983 | 0.9470 | 0.9013 | 0.9818 | 0.0421 |
| SUV420H2   | 0.9009 | 1.1277 | 1.0040 | 0.8949 | 0.9818 | 0.0547 |
| TAS2R31    | 0.9807 | 1.0890 | 1.0039 | 0.8539 | 0.9818 | 0.0486 |
| XAGE-4     | 0.9384 | 1.0775 | 0.9861 | 0.9255 | 0.9818 | 0.0344 |
| LOC646861  | 0.9573 | 1.0292 | 0.9882 | 0.9527 | 0.9819 | 0.0176 |
| LOC729863  | 0.9309 | 1.0288 | 1.0044 | 0.9633 | 0.9819 | 0.0217 |
| LOC647836  | 1.0133 | 1.0666 | 1.0736 | 0.7739 | 0.9819 | 0.0706 |
| SOX14      | 0.9290 | 1.0261 | 1.0493 | 0.9230 | 0.9819 | 0.0326 |
| LOC652690  | 0.8503 | 1.0736 | 1.0433 | 0.9603 | 0.9819 | 0.0500 |
| LOC1001339 | 0.9713 | 0.9882 | 1.0526 | 0.9154 | 0.9819 | 0.0283 |
| LOC1001293 | 0.6896 | 1.0496 | 1.4526 | 0.7356 | 0.9819 | 0.1761 |
| LOC652747  | 0.8367 | 1.1370 | 1.0073 | 0.9465 | 0.9819 | 0.0626 |
| LOC644079  | 0.8992 | 1.0953 | 0.9897 | 0.9432 | 0.9819 | 0.0421 |
| C20orf70   | 1.0091 | 1.1047 | 0.8698 | 0.9439 | 0.9819 | 0.0498 |
| UOX        | 0.9357 | 1.0818 | 1.0542 | 0.8558 | 0.9819 | 0.0526 |
| FLJ31401   | 0.9349 | 1.0826 | 0.9727 | 0.9374 | 0.9819 | 0.0346 |
| DUOXA2     | 0.8840 | 1.1039 | 0.9766 | 0.9630 | 0.9819 | 0.0455 |
| SLC5A11    | 0.9660 | 1.0428 | 1.0644 | 0.8542 | 0.9819 | 0.0475 |
| OLFM3      | 0.9659 | 1.0674 | 0.9071 | 0.9872 | 0.9819 | 0.0332 |
| SNORA21    | 0.7868 | 1.2682 | 0.9487 | 0.9239 | 0.9819 | 0.1019 |
| LYZL1      | 0.8350 | 1.0597 | 1.1043 | 0.9285 | 0.9819 | 0.0616 |
| ATF7IP     | 0.7926 | 1.1233 | 1.0964 | 0.9153 | 0.9819 | 0.0782 |
| LOC652416  | 0.9475 | 1.0056 | 1.0260 | 0.9486 | 0.9819 | 0.0200 |
| LOC643060  | 0.9664 | 1.0260 | 1.0391 | 0.8962 | 0.9819 | 0.0327 |

|            |        |        |        |        |        |        |
|------------|--------|--------|--------|--------|--------|--------|
| CPA4       | 0.9185 | 1.0302 | 0.9859 | 0.9930 | 0.9819 | 0.0233 |
| LOC1001308 | 0.9506 | 1.1120 | 0.9719 | 0.8931 | 0.9819 | 0.0465 |
| ATL3       | 0.6229 | 1.2976 | 1.1868 | 0.8204 | 0.9819 | 0.1572 |
| LOC642127  | 0.9935 | 1.0104 | 1.0115 | 0.9122 | 0.9819 | 0.0236 |
| LCE1A      | 0.8492 | 1.1112 | 1.0340 | 0.9333 | 0.9819 | 0.0573 |
| LOC286177  | 0.9212 | 1.0385 | 1.0789 | 0.8890 | 0.9819 | 0.0456 |
| WNT2B      | 0.9285 | 1.1120 | 1.0081 | 0.8791 | 0.9819 | 0.0508 |
| HES3       | 0.9693 | 1.0458 | 1.0022 | 0.9104 | 0.9819 | 0.0285 |
| TBL1XR1    | 0.7690 | 1.5829 | 0.8801 | 0.6957 | 0.9819 | 0.2039 |
| MIR487B    | 0.9553 | 0.9717 | 1.1087 | 0.8920 | 0.9819 | 0.0456 |
| METTL14    | 0.8254 | 1.2688 | 1.0189 | 0.8146 | 0.9819 | 0.1065 |
| LOC1001294 | 0.9536 | 1.0670 | 0.9873 | 0.9198 | 0.9819 | 0.0315 |
| VTRNA1-2   | 0.8984 | 0.9736 | 1.1623 | 0.8934 | 0.9819 | 0.0629 |
| LOC729950  | 0.9200 | 1.0375 | 1.0992 | 0.8711 | 0.9819 | 0.0524 |
| SCIN       | 1.0270 | 1.0809 | 0.9265 | 0.8934 | 0.9820 | 0.0435 |
| OSM        | 0.9734 | 1.0168 | 0.9433 | 0.9943 | 0.9820 | 0.0156 |
| DST        | 0.9604 | 1.1054 | 0.9846 | 0.8775 | 0.9820 | 0.0471 |
| LCE3A      | 0.8746 | 1.0954 | 1.0729 | 0.8849 | 0.9820 | 0.0592 |
| FRG2       | 0.9761 | 1.0910 | 0.9508 | 0.9100 | 0.9820 | 0.0388 |
| S100A7L2   | 0.8949 | 1.0466 | 1.0442 | 0.9421 | 0.9820 | 0.0379 |
| FLJ35258   | 0.9258 | 1.1057 | 1.0205 | 0.8758 | 0.9820 | 0.0510 |
| LOC645208  | 0.8744 | 0.9664 | 1.0337 | 1.0534 | 0.9820 | 0.0404 |
| FLJ32658   | 1.0089 | 0.9926 | 0.9858 | 0.9406 | 0.9820 | 0.0146 |
| LOC649432  | 0.8707 | 1.1324 | 1.0085 | 0.9163 | 0.9820 | 0.0577 |
| LOC389888  | 0.9164 | 1.1433 | 0.9515 | 0.9167 | 0.9820 | 0.0544 |
| MS4A7      | 0.9622 | 1.0521 | 1.0422 | 0.8715 | 0.9820 | 0.0420 |
| FAM159A    | 0.8795 | 1.1470 | 0.9855 | 0.9159 | 0.9820 | 0.0593 |
| SUCLG2     | 0.8776 | 1.1883 | 1.2028 | 0.6593 | 0.9820 | 0.1311 |
| GOT1L1     | 0.9016 | 1.1322 | 1.0284 | 0.8657 | 0.9820 | 0.0611 |
| KCNJ9      | 0.9946 | 1.0715 | 0.9804 | 0.8815 | 0.9820 | 0.0390 |
| KRT9       | 0.9486 | 1.0468 | 1.0530 | 0.8795 | 0.9820 | 0.0417 |
| ZNF711     | 0.9680 | 0.9772 | 1.0166 | 0.9661 | 0.9820 | 0.0118 |
| HOXC5      | 0.9340 | 1.1166 | 0.8776 | 0.9998 | 0.9820 | 0.0513 |
| KLHL14     | 0.9600 | 0.9904 | 1.0343 | 0.9433 | 0.9820 | 0.0200 |
| LOC647035  | 1.0053 | 1.0042 | 0.9584 | 0.9601 | 0.9820 | 0.0131 |
| FAM151A    | 0.9624 | 1.1162 | 0.9996 | 0.8498 | 0.9820 | 0.0549 |
| KRT17P3    | 0.9239 | 1.0914 | 1.0080 | 0.9048 | 0.9820 | 0.0428 |
| SHE        | 0.9480 | 1.0629 | 0.9460 | 0.9712 | 0.9820 | 0.0275 |
| STON1      | 0.9197 | 1.0811 | 1.0098 | 0.9176 | 0.9820 | 0.0394 |
| CYP7A1     | 0.8796 | 1.0812 | 1.0242 | 0.9431 | 0.9820 | 0.0444 |
| LMX1A      | 0.9657 | 1.0164 | 1.0252 | 0.9208 | 0.9820 | 0.0243 |
| LOC387723  | 0.9816 | 0.9429 | 0.9423 | 1.0615 | 0.9820 | 0.0280 |
| LOC729433  | 0.9584 | 1.0249 | 1.0865 | 0.8583 | 0.9820 | 0.0489 |
| LOC387693  | 1.0220 | 1.0728 | 0.9605 | 0.8729 | 0.9820 | 0.0430 |
| BICD1      | 0.9184 | 1.1590 | 1.0449 | 0.8058 | 0.9820 | 0.0766 |
| ZNF14      | 0.8785 | 1.2669 | 1.0772 | 0.7056 | 0.9820 | 0.1216 |

|            |        |        |        |        |        |        |
|------------|--------|--------|--------|--------|--------|--------|
| LOC646931  | 0.8833 | 1.0263 | 1.0417 | 0.9769 | 0.9821 | 0.0357 |
| MALAT1     | 0.9119 | 1.1064 | 0.9844 | 0.9254 | 0.9821 | 0.0443 |
| KIAA1571   | 0.7662 | 1.2572 | 1.0357 | 0.8691 | 0.9821 | 0.1072 |
| PRKG2      | 1.0009 | 1.0087 | 0.9667 | 0.9520 | 0.9821 | 0.0135 |
| LOC730811  | 0.9298 | 1.0469 | 1.1231 | 0.8284 | 0.9821 | 0.0648 |
| NECAP2     | 0.9827 | 1.2406 | 0.8383 | 0.8667 | 0.9821 | 0.0917 |
| LOC729278  | 0.9523 | 0.9468 | 0.9723 | 1.0569 | 0.9821 | 0.0255 |
| GZMK       | 0.7940 | 1.0763 | 1.1039 | 0.9540 | 0.9821 | 0.0706 |
| MIR1284    | 0.9298 | 1.0432 | 0.9827 | 0.9726 | 0.9821 | 0.0234 |
| LOC390259  | 0.8880 | 1.1101 | 0.9806 | 0.9497 | 0.9821 | 0.0468 |
| LOC647006  | 0.8892 | 1.1234 | 0.9122 | 1.0036 | 0.9821 | 0.0532 |
| CCDC150    | 0.9952 | 1.0082 | 0.9596 | 0.9655 | 0.9821 | 0.0117 |
| PLAC1L     | 0.9606 | 1.0635 | 1.0551 | 0.8492 | 0.9821 | 0.0501 |
| DIDO1      | 0.9075 | 1.1428 | 0.9427 | 0.9353 | 0.9821 | 0.0541 |
| UGT2A1     | 0.8653 | 1.1416 | 1.0245 | 0.8971 | 0.9821 | 0.0633 |
| PLP1       | 0.8727 | 1.1597 | 1.0272 | 0.8688 | 0.9821 | 0.0698 |
| TP53AIP1   | 0.9516 | 1.0015 | 1.0231 | 0.9523 | 0.9821 | 0.0180 |
| LOC1001299 | 0.8883 | 1.1305 | 1.0969 | 0.8128 | 0.9821 | 0.0778 |
| LOC650212  | 0.9345 | 1.0222 | 1.0269 | 0.9449 | 0.9821 | 0.0246 |
| LOC643718  | 0.9014 | 1.1286 | 1.0129 | 0.8856 | 0.9822 | 0.0564 |
| PTPRC      | 0.9856 | 1.0649 | 0.9762 | 0.9019 | 0.9822 | 0.0334 |
| GDNF       | 0.9291 | 1.0300 | 1.1021 | 0.8675 | 0.9822 | 0.0522 |
| LOC652499  | 0.9302 | 0.9599 | 1.0692 | 0.9694 | 0.9822 | 0.0302 |
| CARD16     | 0.9204 | 1.0644 | 1.0414 | 0.9025 | 0.9822 | 0.0413 |
| LDLRAD2    | 0.8629 | 1.1109 | 1.0135 | 0.9413 | 0.9822 | 0.0528 |
| ZNF334     | 0.9831 | 1.1297 | 0.9852 | 0.8307 | 0.9822 | 0.0610 |
| LOC729374  | 0.8489 | 1.1672 | 0.9667 | 0.9459 | 0.9822 | 0.0668 |
| DOK7       | 0.9900 | 0.9599 | 1.0126 | 0.9662 | 0.9822 | 0.0120 |
| LOC728956  | 0.8800 | 1.0918 | 1.0170 | 0.9399 | 0.9822 | 0.0461 |
| LOC1001340 | 0.9173 | 1.0367 | 0.9924 | 0.9822 | 0.9822 | 0.0246 |
| CCDC27     | 0.8663 | 1.2325 | 0.9014 | 0.9286 | 0.9822 | 0.0844 |
| C20orf62   | 0.8838 | 1.0982 | 1.0330 | 0.9137 | 0.9822 | 0.0503 |
| RPS24      | 0.8042 | 1.2813 | 1.0203 | 0.8230 | 0.9822 | 0.1110 |
| TMEM132C   | 0.9912 | 1.1034 | 0.9444 | 0.8898 | 0.9822 | 0.0454 |
| MIR142     | 0.9547 | 1.1355 | 0.9007 | 0.9379 | 0.9822 | 0.0523 |
| GGT5       | 0.8935 | 1.1043 | 1.0311 | 0.8999 | 0.9822 | 0.0516 |
| LOC728081  | 0.9063 | 1.1201 | 1.0498 | 0.8527 | 0.9822 | 0.0620 |
| KIAA0040   | 0.9592 | 1.0480 | 0.9864 | 0.9352 | 0.9822 | 0.0243 |
| LOC642244  | 0.8481 | 1.1435 | 0.9796 | 0.9576 | 0.9822 | 0.0610 |
| GH1        | 0.9501 | 1.1185 | 0.9636 | 0.8966 | 0.9822 | 0.0477 |
| LDHAL6B    | 0.9162 | 1.0380 | 1.0601 | 0.9146 | 0.9822 | 0.0388 |
| TREM1      | 0.9988 | 0.9922 | 0.9944 | 0.9435 | 0.9822 | 0.0130 |
| ZDBF2      | 0.9356 | 1.0423 | 1.0237 | 0.9273 | 0.9822 | 0.0296 |
| LOC652453  | 0.9799 | 1.0941 | 1.0346 | 0.8204 | 0.9822 | 0.0588 |
| LOC646214  | 0.7738 | 1.2391 | 1.3013 | 0.6147 | 0.9822 | 0.1699 |
| ERCC-00084 | 0.8938 | 1.0498 | 1.0677 | 0.9176 | 0.9822 | 0.0446 |

|             |        |        |        |        |        |        |
|-------------|--------|--------|--------|--------|--------|--------|
| PCDHGB5     | 0.9863 | 1.0409 | 0.9314 | 0.9704 | 0.9822 | 0.0227 |
| LOC10013110 | 1.0141 | 0.9951 | 1.0052 | 0.9145 | 0.9822 | 0.0229 |
| SNORD115-4  | 0.9747 | 1.1245 | 0.9223 | 0.9074 | 0.9822 | 0.0496 |
| H6PD        | 0.9747 | 1.0758 | 1.0231 | 0.8555 | 0.9823 | 0.0470 |
| SKIL        | 0.9730 | 1.0382 | 1.0544 | 0.8635 | 0.9823 | 0.0433 |
| LOC730110   | 0.9597 | 1.0009 | 1.0481 | 0.9204 | 0.9823 | 0.0274 |
| LOC650628   | 0.8762 | 1.1412 | 0.9734 | 0.9383 | 0.9823 | 0.0567 |
| C19orf22    | 0.9179 | 1.2374 | 0.9941 | 0.7797 | 0.9823 | 0.0959 |
| LOC728611   | 0.9020 | 1.1318 | 1.0211 | 0.8742 | 0.9823 | 0.0592 |
| SULT2B1     | 0.9506 | 1.1648 | 0.9387 | 0.8749 | 0.9823 | 0.0631 |
| SMC1B       | 0.9507 | 0.9031 | 1.1376 | 0.9378 | 0.9823 | 0.0528 |
| SDR42E1     | 0.8659 | 1.0704 | 1.0642 | 0.9286 | 0.9823 | 0.0507 |
| ZNF843      | 0.8876 | 1.0681 | 0.9961 | 0.9773 | 0.9823 | 0.0371 |
| CLIP2       | 1.0178 | 1.0418 | 0.9658 | 0.9037 | 0.9823 | 0.0306 |
| SERPINB13   | 0.9717 | 1.0476 | 0.9544 | 0.9555 | 0.9823 | 0.0221 |
| MRC1        | 0.9903 | 1.0994 | 1.0281 | 0.8115 | 0.9823 | 0.0613 |
| PRO0628     | 0.9965 | 1.0490 | 0.9816 | 0.9021 | 0.9823 | 0.0304 |
| IFNA21      | 0.9484 | 1.0716 | 0.9890 | 0.9203 | 0.9823 | 0.0329 |
| PCDHA1      | 0.9525 | 1.0245 | 1.0586 | 0.8937 | 0.9823 | 0.0369 |
| ELK3        | 0.9467 | 1.1128 | 0.9941 | 0.8756 | 0.9823 | 0.0499 |
| MMS19L      | 0.8338 | 1.4809 | 0.8817 | 0.7330 | 0.9823 | 0.1690 |
| ADRA2C      | 0.9392 | 1.0953 | 0.9757 | 0.9191 | 0.9823 | 0.0395 |
| LOC653741   | 0.9478 | 1.0195 | 1.0577 | 0.9043 | 0.9823 | 0.0346 |
| BTBD9       | 0.9490 | 1.1236 | 0.9695 | 0.8873 | 0.9823 | 0.0502 |
| LOC642539   | 0.9467 | 1.0479 | 1.0632 | 0.8716 | 0.9823 | 0.0451 |
| TMEM53      | 0.8085 | 1.3739 | 1.0443 | 0.7027 | 0.9823 | 0.1488 |
| MIR1470     | 1.0108 | 0.9966 | 0.9901 | 0.9319 | 0.9823 | 0.0173 |
| FLJ14082    | 0.9773 | 1.1770 | 0.9810 | 0.7941 | 0.9824 | 0.0782 |
| TNC         | 0.9193 | 1.2645 | 1.0086 | 0.7370 | 0.9824 | 0.1097 |
| LOC388210   | 0.8617 | 1.1145 | 1.1262 | 0.8269 | 0.9824 | 0.0800 |
| IRF2BP1     | 0.8876 | 1.1355 | 1.0958 | 0.8106 | 0.9824 | 0.0790 |
| CILP        | 0.9969 | 1.0728 | 0.9943 | 0.8654 | 0.9824 | 0.0430 |
| NLRC5       | 0.8999 | 1.1123 | 1.0109 | 0.9063 | 0.9824 | 0.0502 |
| LOC728449   | 0.9950 | 1.0663 | 1.0575 | 0.8107 | 0.9824 | 0.0594 |
| LOC151457   | 0.9263 | 1.0916 | 1.0434 | 0.8681 | 0.9824 | 0.0515 |
| CTGLF6      | 0.9542 | 1.1059 | 0.9699 | 0.8994 | 0.9824 | 0.0439 |
| LOC647625   | 0.9267 | 1.0858 | 0.9934 | 0.9235 | 0.9824 | 0.0381 |
| RIMBP2      | 0.9413 | 1.0772 | 0.9612 | 0.9498 | 0.9824 | 0.0319 |
| DAZ2        | 0.9262 | 1.0884 | 1.0405 | 0.8744 | 0.9824 | 0.0495 |
| LOC729254   | 0.8698 | 1.0883 | 1.0496 | 0.9218 | 0.9824 | 0.0517 |
| C20orf38    | 0.9100 | 1.0867 | 1.0062 | 0.9265 | 0.9824 | 0.0406 |
| FLJ42418    | 1.0055 | 1.1105 | 0.9880 | 0.8255 | 0.9824 | 0.0589 |
| ERCC-00078  | 1.0330 | 1.0868 | 0.9494 | 0.8603 | 0.9824 | 0.0495 |
| LOC730196   | 0.9312 | 0.9915 | 1.0832 | 0.9236 | 0.9824 | 0.0369 |
| HCN2        | 0.9110 | 1.0540 | 1.0044 | 0.9602 | 0.9824 | 0.0306 |
| LOC643687   | 0.8438 | 1.1613 | 1.0063 | 0.9182 | 0.9824 | 0.0682 |

|            |        |        |        |        |        |        |
|------------|--------|--------|--------|--------|--------|--------|
| LBP        | 0.8647 | 1.1468 | 0.9450 | 0.9731 | 0.9824 | 0.0594 |
| OR51B5     | 0.9156 | 1.1099 | 0.9588 | 0.9452 | 0.9824 | 0.0435 |
| ASB10      | 0.8949 | 1.0101 | 1.0331 | 0.9915 | 0.9824 | 0.0304 |
| NCRNA00092 | 0.8768 | 1.0864 | 1.1548 | 0.8115 | 0.9824 | 0.0821 |
| CD1C       | 0.9484 | 0.9826 | 1.1352 | 0.8634 | 0.9824 | 0.0568 |
| CCT8L2     | 0.9860 | 0.9831 | 1.0030 | 0.9576 | 0.9824 | 0.0094 |
| LOC731283  | 0.9388 | 1.0153 | 1.0790 | 0.8966 | 0.9824 | 0.0405 |
| PCDP1      | 0.8713 | 1.1301 | 1.0025 | 0.9257 | 0.9824 | 0.0561 |
| LOC284890  | 0.9054 | 1.0822 | 1.0136 | 0.9284 | 0.9824 | 0.0406 |
| OTUD5      | 0.7698 | 1.1902 | 1.0232 | 0.9465 | 0.9824 | 0.0872 |
| LOC1001320 | 0.9896 | 1.0388 | 1.0895 | 0.8117 | 0.9824 | 0.0605 |
| PTPRO      | 0.8954 | 1.1137 | 1.0085 | 0.9121 | 0.9824 | 0.0504 |
| LRRC16A    | 0.9481 | 1.1196 | 1.0589 | 0.8031 | 0.9824 | 0.0695 |
| SSX2       | 0.9686 | 1.0680 | 1.0003 | 0.8928 | 0.9824 | 0.0364 |
| PBX1       | 0.8950 | 1.3011 | 0.9802 | 0.7534 | 0.9824 | 0.1161 |
| KRTAP27-1  | 0.9451 | 1.0710 | 1.0385 | 0.8751 | 0.9824 | 0.0446 |
| PMS2L4     | 0.7357 | 1.4411 | 0.9640 | 0.7889 | 0.9824 | 0.1605 |
| C9orf122   | 0.9067 | 1.0917 | 1.0800 | 0.8513 | 0.9824 | 0.0608 |
| FLJ32784   | 0.9899 | 1.0629 | 1.0167 | 0.8601 | 0.9824 | 0.0435 |
| FLJ90231   | 0.9303 | 1.0145 | 1.0441 | 0.9408 | 0.9824 | 0.0278 |
| LOC653512  | 0.9748 | 1.0099 | 1.0422 | 0.9029 | 0.9824 | 0.0299 |
| LOC732107  | 0.9925 | 1.0354 | 0.9801 | 0.9217 | 0.9824 | 0.0235 |
| LOC1001278 | 0.9169 | 1.2118 | 0.9278 | 0.8732 | 0.9824 | 0.0774 |
| LOC642707  | 0.9084 | 1.0796 | 1.0115 | 0.9304 | 0.9824 | 0.0392 |
| LOC645661  | 0.9436 | 1.0131 | 1.0635 | 0.9097 | 0.9825 | 0.0345 |
| SNORD113-4 | 0.9865 | 1.1827 | 0.9005 | 0.8602 | 0.9825 | 0.0718 |
| LOC728494  | 0.9095 | 1.1061 | 1.0579 | 0.8564 | 0.9825 | 0.0593 |
| LOC1001285 | 0.9849 | 0.9842 | 1.0142 | 0.9465 | 0.9825 | 0.0139 |
| ATP8A2     | 0.9702 | 1.0620 | 0.9939 | 0.9038 | 0.9825 | 0.0326 |
| C7orf57    | 1.0015 | 0.9923 | 1.0360 | 0.9001 | 0.9825 | 0.0290 |
| LOC653086  | 0.9569 | 1.1335 | 1.0241 | 0.8155 | 0.9825 | 0.0665 |
| SFN        | 0.9204 | 1.0191 | 1.0773 | 0.9131 | 0.9825 | 0.0398 |
| TBC1D3F    | 0.8423 | 1.2285 | 1.0213 | 0.8379 | 0.9825 | 0.0925 |
| PLCB1      | 1.0265 | 1.0863 | 1.0179 | 0.7993 | 0.9825 | 0.0629 |
| C6orf118   | 0.9327 | 1.0638 | 1.0727 | 0.8607 | 0.9825 | 0.0517 |
| PAX6       | 0.9859 | 1.0214 | 1.0111 | 0.9116 | 0.9825 | 0.0248 |
| XKR5       | 0.7868 | 1.0425 | 1.1488 | 0.9519 | 0.9825 | 0.0766 |
| ARID4A     | 0.9027 | 1.1705 | 1.0511 | 0.8056 | 0.9825 | 0.0805 |
| ERCC-00109 | 0.8644 | 1.0096 | 1.0839 | 0.9721 | 0.9825 | 0.0457 |
| LOC1001318 | 0.9187 | 1.0873 | 0.9988 | 0.9251 | 0.9825 | 0.0394 |
| LOC728692  | 0.8965 | 1.0626 | 1.0259 | 0.9450 | 0.9825 | 0.0378 |
| LOC649406  | 1.0220 | 0.9184 | 0.9976 | 0.9920 | 0.9825 | 0.0224 |
| MIR489     | 1.0052 | 1.0201 | 1.0176 | 0.8871 | 0.9825 | 0.0320 |
| PRB1       | 0.9212 | 1.0399 | 1.0279 | 0.9411 | 0.9825 | 0.0300 |
| STK35      | 0.9019 | 1.4048 | 0.9076 | 0.7157 | 0.9825 | 0.1477 |
| LOC1001299 | 0.9396 | 1.0576 | 0.9897 | 0.9431 | 0.9825 | 0.0275 |

|            |        |        |        |        |        |        |
|------------|--------|--------|--------|--------|--------|--------|
| LOC284837  | 1.0942 | 1.0267 | 0.8695 | 0.9397 | 0.9825 | 0.0492 |
| LOC1001287 | 0.8746 | 0.9103 | 1.0737 | 1.0715 | 0.9825 | 0.0525 |
| LOC645529  | 0.8607 | 1.0794 | 1.0381 | 0.9520 | 0.9826 | 0.0485 |
| RPL30      | 0.9164 | 1.1326 | 1.0468 | 0.8345 | 0.9826 | 0.0664 |
| LOC728380  | 1.0617 | 0.9214 | 0.9631 | 0.9840 | 0.9826 | 0.0294 |
| LOC732424  | 1.0074 | 1.0708 | 0.9441 | 0.9079 | 0.9826 | 0.0359 |
| CD52       | 1.0255 | 1.1695 | 0.8978 | 0.8375 | 0.9826 | 0.0736 |
| LOC727922  | 0.8574 | 1.0959 | 1.0870 | 0.8900 | 0.9826 | 0.0632 |
| IER3IP1    | 0.9182 | 1.0400 | 1.2182 | 0.7539 | 0.9826 | 0.0980 |
| ERCC-00097 | 0.8920 | 1.1898 | 0.9248 | 0.9238 | 0.9826 | 0.0695 |
| MGC62100   | 0.9126 | 1.1170 | 1.0580 | 0.8427 | 0.9826 | 0.0634 |
| LOC645231  | 0.9253 | 1.0422 | 1.0530 | 0.9098 | 0.9826 | 0.0377 |
| BAIAP3     | 0.9634 | 1.0023 | 1.0629 | 0.9017 | 0.9826 | 0.0339 |
| CERKL      | 0.9705 | 1.0425 | 0.9831 | 0.9344 | 0.9826 | 0.0225 |
| HIST1H2BN  | 0.9257 | 1.0908 | 1.0136 | 0.9004 | 0.9826 | 0.0435 |
| LOC388910  | 0.9839 | 1.0811 | 0.9711 | 0.8943 | 0.9826 | 0.0383 |
| C1orf185   | 0.9758 | 1.0148 | 0.9224 | 1.0174 | 0.9826 | 0.0222 |
| LOC652512  | 1.0119 | 0.9950 | 0.9661 | 0.9574 | 0.9826 | 0.0126 |
| LOC642452  | 0.8789 | 1.1245 | 0.9905 | 0.9365 | 0.9826 | 0.0525 |
| RNU4-1     | 0.8213 | 1.1876 | 1.0132 | 0.9084 | 0.9826 | 0.0788 |
| MIOX       | 0.9479 | 0.9618 | 1.0363 | 0.9845 | 0.9826 | 0.0194 |
| SAMHD1     | 0.8272 | 1.0522 | 1.1395 | 0.9117 | 0.9826 | 0.0699 |
| GRIA1      | 1.0806 | 1.0277 | 0.9492 | 0.8730 | 0.9826 | 0.0454 |
| LOC651345  | 0.9977 | 1.0561 | 0.9827 | 0.8940 | 0.9826 | 0.0335 |
| CKM        | 0.8879 | 1.0844 | 0.9932 | 0.9651 | 0.9826 | 0.0406 |
| LOC1001345 | 1.0004 | 1.0798 | 1.0751 | 0.7753 | 0.9826 | 0.0715 |
| BTBD8      | 0.9259 | 1.0814 | 1.0121 | 0.9112 | 0.9827 | 0.0397 |
| DSCAML1    | 0.8963 | 1.1256 | 0.9648 | 0.9439 | 0.9827 | 0.0498 |
| MIR549     | 0.9189 | 1.0426 | 0.9927 | 0.9764 | 0.9827 | 0.0255 |
| MIR568     | 0.9546 | 1.1466 | 0.8511 | 0.9783 | 0.9827 | 0.0612 |
| ARL10      | 0.9739 | 1.0786 | 0.9213 | 0.9568 | 0.9827 | 0.0338 |
| LOC652804  | 1.0186 | 1.0557 | 1.0211 | 0.8354 | 0.9827 | 0.0498 |
| CACNA1D    | 0.8024 | 1.1680 | 1.0833 | 0.8769 | 0.9827 | 0.0857 |
| ACACB      | 1.0010 | 1.2480 | 0.8326 | 0.8490 | 0.9827 | 0.0962 |
| GATA3      | 0.9406 | 1.0933 | 1.0475 | 0.8492 | 0.9827 | 0.0548 |
| HIVEP3     | 0.8242 | 1.0832 | 1.0782 | 0.9451 | 0.9827 | 0.0618 |
| LOC1001305 | 0.9731 | 1.0176 | 1.0980 | 0.8420 | 0.9827 | 0.0535 |
| CLTB       | 0.8794 | 1.2182 | 1.0251 | 0.8081 | 0.9827 | 0.0906 |
| LOC643222  | 0.8614 | 1.0914 | 1.0432 | 0.9348 | 0.9827 | 0.0520 |
| LOC440804  | 0.9573 | 1.1119 | 0.9752 | 0.8865 | 0.9827 | 0.0471 |
| SH2D5      | 0.8725 | 1.1144 | 0.9894 | 0.9546 | 0.9827 | 0.0503 |
| HSPA2      | 0.9226 | 1.0934 | 0.9991 | 0.9158 | 0.9827 | 0.0414 |
| MOXD1      | 0.9641 | 1.0309 | 1.0050 | 0.9309 | 0.9827 | 0.0221 |
| LOC400301  | 1.0224 | 1.0483 | 0.9922 | 0.8679 | 0.9827 | 0.0399 |
| LOC1001287 | 0.9217 | 1.0991 | 0.9576 | 0.9525 | 0.9827 | 0.0396 |
| LOC653887  | 0.8691 | 1.1570 | 1.0302 | 0.8746 | 0.9827 | 0.0691 |



|            |        |        |        |        |        |        |
|------------|--------|--------|--------|--------|--------|--------|
| OLFML2B    | 0.9441 | 1.0666 | 0.9622 | 0.9580 | 0.9827 | 0.0282 |
| LOC401525  | 0.8969 | 1.1565 | 0.9734 | 0.9042 | 0.9827 | 0.0604 |
| SNORD21    | 0.8753 | 1.0933 | 1.1077 | 0.8546 | 0.9827 | 0.0682 |
| SPNS2      | 0.8495 | 1.1946 | 0.9639 | 0.9229 | 0.9827 | 0.0745 |
| LOC1001310 | 0.9177 | 1.1119 | 1.0504 | 0.8510 | 0.9828 | 0.0598 |
| LOC401720  | 0.9253 | 1.2003 | 0.8836 | 0.9217 | 0.9828 | 0.0731 |
| LOC402360  | 0.8545 | 1.0876 | 1.0431 | 0.9458 | 0.9828 | 0.0520 |
| LOC648823  | 0.8575 | 1.0927 | 1.0335 | 0.9473 | 0.9828 | 0.0513 |
| FLRT3      | 0.9468 | 1.0604 | 0.9973 | 0.9265 | 0.9828 | 0.0299 |
| USP28      | 0.9528 | 1.0357 | 1.0153 | 0.9273 | 0.9828 | 0.0255 |
| ORAI2      | 0.8861 | 1.1975 | 0.9525 | 0.8949 | 0.9828 | 0.0731 |
| LOC440910  | 0.9652 | 1.0451 | 0.9805 | 0.9403 | 0.9828 | 0.0224 |
| PRDM9      | 0.8750 | 1.1791 | 0.9533 | 0.9237 | 0.9828 | 0.0674 |
| LOC1001308 | 0.9770 | 1.1091 | 0.9613 | 0.8837 | 0.9828 | 0.0468 |
| TNF        | 0.9231 | 1.0866 | 1.0594 | 0.8619 | 0.9828 | 0.0539 |
| XAGE1C     | 0.9505 | 1.0690 | 1.1621 | 0.7495 | 0.9828 | 0.0890 |
| SPO11      | 0.9033 | 1.0932 | 0.9710 | 0.9636 | 0.9828 | 0.0398 |
| SEMA4C     | 0.9334 | 1.1244 | 0.9702 | 0.9032 | 0.9828 | 0.0492 |
| CCDC134    | 0.8402 | 1.1826 | 1.0479 | 0.8605 | 0.9828 | 0.0814 |
| LOC649313  | 0.8897 | 1.0847 | 0.9934 | 0.9633 | 0.9828 | 0.0404 |
| LOC728005  | 0.9288 | 1.0067 | 1.0666 | 0.9291 | 0.9828 | 0.0334 |
| MIR339     | 1.0076 | 1.0179 | 1.0239 | 0.8818 | 0.9828 | 0.0338 |
| FAM159B    | 0.9417 | 1.0414 | 1.0986 | 0.8496 | 0.9828 | 0.0550 |
| ABCB4      | 0.8720 | 1.0654 | 1.0373 | 0.9566 | 0.9828 | 0.0435 |
| LOC152742  | 0.9708 | 1.1027 | 1.0078 | 0.8500 | 0.9828 | 0.0523 |
| OBSL1      | 0.9036 | 0.9492 | 1.0065 | 1.0720 | 0.9828 | 0.0364 |
| MIR668     | 0.9565 | 1.1519 | 1.0179 | 0.8050 | 0.9828 | 0.0719 |
| PRR20D     | 0.9869 | 1.0729 | 0.9282 | 0.9433 | 0.9828 | 0.0325 |
| TXNRD3IT1  | 0.8938 | 1.1350 | 0.9968 | 0.9057 | 0.9828 | 0.0557 |
| ZNF330     | 0.7154 | 1.3925 | 1.0799 | 0.7436 | 0.9828 | 0.1597 |
| FOXI3      | 0.8709 | 1.1441 | 1.0018 | 0.9146 | 0.9828 | 0.0602 |
| LOC730908  | 0.9168 | 1.1039 | 1.0832 | 0.8276 | 0.9828 | 0.0666 |
| HSFYP1     | 0.8804 | 1.0581 | 1.0751 | 0.9178 | 0.9829 | 0.0491 |
| TP53I11    | 1.0019 | 1.0851 | 1.0883 | 0.7562 | 0.9829 | 0.0782 |
| GAS2L1     | 0.9224 | 1.1280 | 1.0267 | 0.8543 | 0.9829 | 0.0600 |
| LOC647592  | 0.9827 | 1.0284 | 1.0115 | 0.9088 | 0.9829 | 0.0264 |
| SPATS1     | 0.9774 | 1.0067 | 1.0259 | 0.9215 | 0.9829 | 0.0228 |
| FLJ14213   | 0.8888 | 1.1228 | 0.9852 | 0.9346 | 0.9829 | 0.0506 |
| CCDC52     | 0.8792 | 1.1369 | 1.0039 | 0.9115 | 0.9829 | 0.0577 |
| LOC650942  | 1.0060 | 0.9978 | 1.0022 | 0.9255 | 0.9829 | 0.0192 |
| LOC652652  | 0.9550 | 1.0503 | 1.0416 | 0.8846 | 0.9829 | 0.0392 |
| LOC1001333 | 0.9161 | 1.1377 | 0.9889 | 0.8889 | 0.9829 | 0.0558 |
| CCDC152    | 0.9684 | 1.0062 | 1.0575 | 0.8995 | 0.9829 | 0.0333 |
| LOC1001346 | 0.9383 | 0.9972 | 1.1123 | 0.8839 | 0.9829 | 0.0489 |
| KIR3DL2    | 0.9572 | 1.0385 | 1.0760 | 0.8600 | 0.9829 | 0.0479 |
| SNORD53    | 0.9784 | 1.0363 | 1.0028 | 0.9141 | 0.9829 | 0.0258 |

|            |        |        |        |        |        |        |
|------------|--------|--------|--------|--------|--------|--------|
| RHPN2      | 0.9024 | 1.4658 | 0.9856 | 0.5778 | 0.9829 | 0.1834 |
| RORA       | 0.9702 | 1.0424 | 1.0365 | 0.8826 | 0.9829 | 0.0372 |
| PRAMEF21   | 0.9817 | 1.1163 | 0.9929 | 0.8407 | 0.9829 | 0.0564 |
| LOC1001316 | 0.9091 | 1.0434 | 0.9989 | 0.9803 | 0.9829 | 0.0279 |
| GPR173     | 0.9223 | 1.0407 | 1.0614 | 0.9073 | 0.9829 | 0.0397 |
| STAC2      | 1.0755 | 1.0069 | 0.9633 | 0.8861 | 0.9829 | 0.0397 |
| LOC1001279 | 0.9038 | 1.0807 | 1.0570 | 0.8904 | 0.9830 | 0.0499 |
| DEFB134    | 0.9921 | 1.1169 | 1.0311 | 0.7917 | 0.9830 | 0.0689 |
| KLF1       | 0.8822 | 1.1961 | 0.9591 | 0.8945 | 0.9830 | 0.0730 |
| LOC645268  | 0.9788 | 1.0751 | 1.0484 | 0.8296 | 0.9830 | 0.0550 |
| LOC440563  | 0.9936 | 0.9354 | 1.0111 | 0.9917 | 0.9830 | 0.0164 |
| LOC648456  | 0.9171 | 1.0997 | 0.9917 | 0.9235 | 0.9830 | 0.0424 |
| POU5F1P1   | 1.0111 | 0.9971 | 1.0461 | 0.8777 | 0.9830 | 0.0366 |
| ERCC-00148 | 0.9148 | 1.0193 | 1.0153 | 0.9825 | 0.9830 | 0.0242 |
| FOXI1      | 0.9271 | 1.0690 | 0.9916 | 0.9443 | 0.9830 | 0.0318 |
| MIR1979    | 0.9151 | 1.0486 | 1.0195 | 0.9487 | 0.9830 | 0.0309 |
| LOC650238  | 0.7157 | 1.1911 | 0.9643 | 1.0608 | 0.9830 | 0.1005 |
| PRPF31     | 0.9119 | 1.2582 | 1.0202 | 0.7417 | 0.9830 | 0.1082 |
| ZNF114     | 0.9287 | 1.1672 | 1.0144 | 0.8217 | 0.9830 | 0.0730 |
| LOC650239  | 0.9798 | 1.0632 | 0.9802 | 0.9089 | 0.9830 | 0.0315 |
| HUS1B      | 0.9458 | 1.1430 | 0.9074 | 0.9359 | 0.9830 | 0.0539 |
| LOC116349  | 0.9103 | 1.1584 | 1.0231 | 0.8403 | 0.9830 | 0.0695 |
| LOC1001345 | 0.8766 | 1.0551 | 1.0958 | 0.9047 | 0.9830 | 0.0543 |
| STELLAR    | 0.9733 | 1.0634 | 1.0050 | 0.8905 | 0.9830 | 0.0361 |
| GIYD2      | 0.8135 | 1.1460 | 1.0237 | 0.9490 | 0.9831 | 0.0696 |
| PTX3       | 0.9255 | 1.0775 | 1.0009 | 0.9283 | 0.9831 | 0.0360 |
| LOC646190  | 0.8467 | 1.0441 | 1.0556 | 0.9860 | 0.9831 | 0.0480 |
| KDSR       | 0.9757 | 1.1966 | 0.8620 | 0.8979 | 0.9831 | 0.0750 |
| LOC1001293 | 1.0125 | 0.9891 | 1.0147 | 0.9160 | 0.9831 | 0.0231 |
| LOC1001295 | 0.9069 | 1.0983 | 0.9909 | 0.9363 | 0.9831 | 0.0422 |
| BIRC1      | 0.9336 | 1.1317 | 0.9676 | 0.8996 | 0.9831 | 0.0514 |
| TRR1       | 0.9269 | 1.1278 | 0.9966 | 0.8811 | 0.9831 | 0.0537 |
| C17orf82   | 0.9508 | 1.1598 | 1.0264 | 0.7954 | 0.9831 | 0.0760 |
| POSTN      | 0.9423 | 1.0565 | 0.9829 | 0.9507 | 0.9831 | 0.0260 |
| NR112      | 0.9421 | 1.0405 | 1.0661 | 0.8837 | 0.9831 | 0.0426 |
| LOC643342  | 0.9227 | 1.1205 | 1.0216 | 0.8676 | 0.9831 | 0.0558 |
| MIR376C    | 0.9157 | 1.1009 | 0.9532 | 0.9627 | 0.9831 | 0.0406 |
| LOC390367  | 0.8881 | 1.0781 | 1.0279 | 0.9384 | 0.9831 | 0.0429 |
| CLDN12     | 0.8075 | 1.3572 | 1.0176 | 0.7501 | 0.9831 | 0.1373 |
| LOC1001338 | 0.9421 | 1.1628 | 0.9160 | 0.9116 | 0.9831 | 0.0603 |
| CLEC2A     | 1.0074 | 1.0124 | 1.0753 | 0.8374 | 0.9831 | 0.0510 |
| MRGPRG     | 0.8418 | 1.1165 | 1.0282 | 0.9461 | 0.9831 | 0.0586 |
| C3orf72    | 0.9597 | 1.0466 | 0.9760 | 0.9502 | 0.9831 | 0.0218 |
| LOC642210  | 0.9500 | 1.0642 | 0.9876 | 0.9308 | 0.9831 | 0.0295 |
| PRR17      | 0.9612 | 1.1701 | 0.9094 | 0.8918 | 0.9831 | 0.0640 |
| SNORA32    | 0.9747 | 1.1318 | 0.9428 | 0.8833 | 0.9831 | 0.0531 |

|            |        |        |        |        |        |        |
|------------|--------|--------|--------|--------|--------|--------|
| ADCY4      | 0.9069 | 1.1200 | 0.9480 | 0.9577 | 0.9831 | 0.0469 |
| CCL7       | 0.9214 | 1.0447 | 1.0787 | 0.8877 | 0.9832 | 0.0464 |
| LOC642446  | 0.9073 | 1.1335 | 1.0100 | 0.8818 | 0.9832 | 0.0573 |
| PCDHA13    | 0.9618 | 1.0122 | 1.0059 | 0.9527 | 0.9832 | 0.0151 |
| SLC17A5    | 0.8535 | 1.0902 | 1.0526 | 0.9363 | 0.9832 | 0.0542 |
| LOC391359  | 0.9236 | 0.9825 | 1.1135 | 0.9131 | 0.9832 | 0.0461 |
| SLC7A9     | 0.8940 | 1.1275 | 1.0161 | 0.8951 | 0.9832 | 0.0560 |
| LOC1001302 | 0.8814 | 1.1418 | 1.0184 | 0.8911 | 0.9832 | 0.0614 |
| STEAP4     | 0.9550 | 1.0832 | 1.0116 | 0.8828 | 0.9832 | 0.0425 |
| GDF7       | 0.9307 | 1.0682 | 1.0577 | 0.8762 | 0.9832 | 0.0474 |
| LOC652898  | 1.0407 | 1.0753 | 0.9886 | 0.8281 | 0.9832 | 0.0547 |
| GGTL3      | 0.9762 | 1.0903 | 0.9502 | 0.9161 | 0.9832 | 0.0378 |
| RPL3       | 0.9039 | 1.2224 | 1.0854 | 0.7210 | 0.9832 | 0.1090 |
| MIR555     | 0.8840 | 1.0854 | 0.9640 | 0.9995 | 0.9832 | 0.0418 |
| C10orf53   | 0.9077 | 1.0622 | 1.0356 | 0.9273 | 0.9832 | 0.0386 |
| LOC729198  | 0.9187 | 1.1180 | 0.9771 | 0.9190 | 0.9832 | 0.0470 |
| LOC1001299 | 0.9530 | 1.0166 | 1.0215 | 0.9418 | 0.9832 | 0.0208 |
| PRODH      | 0.9670 | 0.9721 | 1.0802 | 0.9136 | 0.9832 | 0.0349 |
| ROBO4      | 0.9618 | 1.0401 | 1.0309 | 0.9001 | 0.9832 | 0.0327 |
| CA8        | 0.9583 | 1.0628 | 0.9880 | 0.9238 | 0.9832 | 0.0296 |
| LYRM5      | 0.9325 | 1.0289 | 1.2596 | 0.7119 | 0.9832 | 0.1135 |
| MRPL49     | 0.9697 | 1.1567 | 1.0575 | 0.7490 | 0.9832 | 0.0869 |
| C22orf31   | 1.0479 | 1.0619 | 0.9601 | 0.8629 | 0.9832 | 0.0460 |
| RPS11      | 0.9294 | 1.0448 | 1.0862 | 0.8725 | 0.9832 | 0.0496 |
| PSMD9      | 0.9960 | 1.0135 | 1.0559 | 0.8675 | 0.9832 | 0.0406 |
| XKR7       | 0.9383 | 0.9953 | 1.0877 | 0.9115 | 0.9832 | 0.0390 |
| KLHL31     | 0.9697 | 1.0489 | 0.9248 | 0.9894 | 0.9832 | 0.0257 |
| KLRB1      | 0.8798 | 1.0761 | 1.0264 | 0.9506 | 0.9832 | 0.0431 |
| LOC131055  | 0.9853 | 0.9548 | 1.1240 | 0.8689 | 0.9832 | 0.0530 |
| LOC646585  | 0.8297 | 1.2662 | 1.0329 | 0.8042 | 0.9832 | 0.1073 |
| LOC1001282 | 0.7992 | 1.0672 | 1.2880 | 0.7785 | 0.9832 | 0.1210 |
| ARMCX2     | 0.9648 | 0.9451 | 1.0547 | 0.9684 | 0.9832 | 0.0244 |
| LOC642480  | 0.9857 | 0.9533 | 1.0593 | 0.9346 | 0.9832 | 0.0275 |
| LOC650488  | 0.9295 | 1.0568 | 1.0856 | 0.8610 | 0.9832 | 0.0530 |
| PON1       | 0.9417 | 1.1061 | 0.9215 | 0.9637 | 0.9832 | 0.0419 |
| KRT71      | 0.9722 | 1.0136 | 0.9714 | 0.9757 | 0.9832 | 0.0102 |
| LOC653437  | 1.0896 | 1.0388 | 0.9787 | 0.8259 | 0.9833 | 0.0571 |
| DKFZP434L1 | 0.9533 | 1.1418 | 0.9644 | 0.8736 | 0.9833 | 0.0566 |
| LOC651453  | 0.9209 | 1.1533 | 1.1727 | 0.6861 | 0.9833 | 0.1144 |
| LOC1001326 | 0.9636 | 1.0423 | 1.0767 | 0.8504 | 0.9833 | 0.0502 |
| LOC439994  | 0.8725 | 1.1026 | 1.1324 | 0.8256 | 0.9833 | 0.0783 |
| PRAF2      | 0.8518 | 1.2175 | 1.0455 | 0.8183 | 0.9833 | 0.0928 |
| PCDHA3     | 0.9456 | 1.0812 | 0.9980 | 0.9083 | 0.9833 | 0.0375 |
| LOC1001307 | 0.9897 | 1.0161 | 1.0343 | 0.8930 | 0.9833 | 0.0314 |
| FLJ20209   | 0.8415 | 1.0286 | 1.1488 | 0.9143 | 0.9833 | 0.0673 |
| MFAP4      | 1.0450 | 1.0247 | 1.0382 | 0.8252 | 0.9833 | 0.0529 |

|            |        |        |        |        |        |        |
|------------|--------|--------|--------|--------|--------|--------|
| LOC440491  | 0.9521 | 1.1031 | 0.9569 | 0.9210 | 0.9833 | 0.0407 |
| CISH       | 0.9347 | 1.0947 | 1.0019 | 0.9019 | 0.9833 | 0.0426 |
| LOC1001282 | 0.8748 | 1.0707 | 0.9862 | 1.0015 | 0.9833 | 0.0406 |
| FAM153A    | 0.8949 | 1.0990 | 1.0706 | 0.8686 | 0.9833 | 0.0591 |
| SEC61G     | 0.8993 | 1.2045 | 1.0638 | 0.7654 | 0.9833 | 0.0957 |
| CCNJL      | 0.8868 | 1.0701 | 1.0565 | 0.9196 | 0.9833 | 0.0468 |
| C19orf59   | 0.9120 | 1.1647 | 1.0195 | 0.8370 | 0.9833 | 0.0711 |
| LOC650429  | 0.8978 | 1.0283 | 1.0544 | 0.9526 | 0.9833 | 0.0358 |
| NEU4       | 0.9689 | 1.0705 | 1.0002 | 0.8936 | 0.9833 | 0.0367 |
| RSPH3      | 0.9417 | 1.1564 | 1.0727 | 0.7623 | 0.9833 | 0.0859 |
| TNNC2      | 0.9543 | 1.0166 | 1.0678 | 0.8945 | 0.9833 | 0.0376 |
| ANO4       | 0.9483 | 1.0640 | 1.0061 | 0.9149 | 0.9833 | 0.0328 |
| XCR1       | 0.8403 | 1.0288 | 1.1027 | 0.9614 | 0.9833 | 0.0557 |
| LOC649817  | 0.8858 | 1.1132 | 1.0818 | 0.8525 | 0.9833 | 0.0666 |
| PTPN14     | 1.0204 | 1.0595 | 0.9518 | 0.9017 | 0.9833 | 0.0352 |
| TMEM87A    | 0.7735 | 1.3648 | 1.0851 | 0.7099 | 0.9833 | 0.1513 |
| LOC441268  | 0.9531 | 1.1654 | 0.9548 | 0.8600 | 0.9833 | 0.0646 |
| LOC1001299 | 0.9280 | 1.1454 | 1.0708 | 0.7891 | 0.9833 | 0.0789 |
| HSPA8      | 0.8194 | 1.2923 | 1.0820 | 0.7397 | 0.9833 | 0.1263 |
| BLK        | 0.9184 | 1.0589 | 1.0586 | 0.8975 | 0.9833 | 0.0437 |
| FLJ44186   | 0.8864 | 1.0399 | 1.0876 | 0.9195 | 0.9834 | 0.0479 |
| KLKBL4     | 0.8695 | 1.0312 | 1.0623 | 0.9705 | 0.9834 | 0.0425 |
| LOC402617  | 0.8615 | 1.1438 | 0.9581 | 0.9701 | 0.9834 | 0.0587 |
| C3orf47    | 0.8806 | 1.1362 | 0.9831 | 0.9335 | 0.9834 | 0.0551 |
| KCNE2      | 0.9759 | 1.0896 | 0.9602 | 0.9078 | 0.9834 | 0.0383 |
| LOC642799  | 0.9608 | 1.0608 | 1.0215 | 0.8904 | 0.9834 | 0.0372 |
| BRS3       | 0.8463 | 1.0495 | 1.0929 | 0.9448 | 0.9834 | 0.0553 |
| LOC644806  | 0.9052 | 1.0545 | 1.0145 | 0.9593 | 0.9834 | 0.0326 |
| FLJ35424   | 0.9331 | 1.0052 | 1.0327 | 0.9626 | 0.9834 | 0.0221 |
| ST6GALNAC2 | 0.9647 | 1.1768 | 1.0279 | 0.7641 | 0.9834 | 0.0855 |
| LOC729003  | 0.8851 | 1.0842 | 1.0997 | 0.8646 | 0.9834 | 0.0629 |
| LOC650849  | 0.8781 | 1.0541 | 1.0561 | 0.9452 | 0.9834 | 0.0436 |
| SMC5       | 0.8447 | 1.1015 | 1.0786 | 0.9088 | 0.9834 | 0.0631 |
| P2RY10     | 0.8875 | 1.0787 | 0.9990 | 0.9683 | 0.9834 | 0.0395 |
| FBXO25     | 0.9490 | 1.0794 | 1.0620 | 0.8431 | 0.9834 | 0.0550 |
| MST1R      | 0.9131 | 1.0802 | 1.0115 | 0.9288 | 0.9834 | 0.0388 |
| MRGPRD     | 0.9708 | 1.0474 | 0.9996 | 0.9158 | 0.9834 | 0.0275 |
| LOC646156  | 0.8245 | 1.0497 | 1.0576 | 1.0019 | 0.9834 | 0.0544 |
| OTOS       | 0.9971 | 1.0809 | 0.9534 | 0.9022 | 0.9834 | 0.0379 |
| CXCL5      | 0.9313 | 1.1107 | 1.0351 | 0.8566 | 0.9834 | 0.0560 |
| C11orf39   | 1.0208 | 1.0432 | 1.0137 | 0.8560 | 0.9834 | 0.0429 |
| KCNJ4      | 0.8967 | 1.1051 | 1.1046 | 0.8275 | 0.9834 | 0.0715 |
| LOC729191  | 0.9103 | 1.1234 | 1.0149 | 0.8852 | 0.9834 | 0.0545 |
| IQUB       | 0.9056 | 1.1895 | 0.8750 | 0.9636 | 0.9834 | 0.0711 |
| LOC642423  | 0.9049 | 1.1772 | 0.9217 | 0.9300 | 0.9834 | 0.0648 |
| MURC       | 0.9537 | 1.0296 | 0.9910 | 0.9594 | 0.9834 | 0.0174 |

|            |        |        |        |        |        |        |
|------------|--------|--------|--------|--------|--------|--------|
| LOC643396  | 0.9142 | 0.9988 | 1.0989 | 0.9218 | 0.9834 | 0.0430 |
| ALDH3A1    | 0.9718 | 1.1248 | 1.0114 | 0.8258 | 0.9834 | 0.0617 |
| LOC648237  | 0.9594 | 1.0292 | 1.0410 | 0.9041 | 0.9834 | 0.0320 |
| NEGR1      | 0.9785 | 1.0744 | 1.0277 | 0.8532 | 0.9834 | 0.0476 |
| LOC645033  | 0.9319 | 1.0059 | 1.0736 | 0.9225 | 0.9834 | 0.0354 |
| CLMN       | 0.9295 | 1.1653 | 0.9565 | 0.8824 | 0.9835 | 0.0625 |
| FLJ40194   | 0.8949 | 1.2262 | 0.9683 | 0.8443 | 0.9835 | 0.0848 |
| PSMD8      | 0.8039 | 1.4745 | 0.9920 | 0.6635 | 0.9835 | 0.1770 |
| LOC652148  | 0.9964 | 1.1084 | 0.9792 | 0.8499 | 0.9835 | 0.0530 |
| PNPLA1     | 1.0304 | 1.0043 | 1.0551 | 0.8441 | 0.9835 | 0.0476 |
| RPL27A     | 0.9085 | 1.0983 | 1.0243 | 0.9026 | 0.9835 | 0.0474 |
| OR5M11     | 0.9620 | 1.0423 | 1.0371 | 0.8924 | 0.9835 | 0.0355 |
| LOC440993  | 0.9448 | 1.1112 | 0.9679 | 0.9100 | 0.9835 | 0.0442 |
| LOC440386  | 0.9905 | 1.1259 | 0.9250 | 0.8926 | 0.9835 | 0.0516 |
| OR51G1     | 0.9382 | 1.0934 | 0.9902 | 0.9120 | 0.9835 | 0.0401 |
| EIF4E3     | 0.8686 | 1.2639 | 1.0597 | 0.7417 | 0.9835 | 0.1141 |
| USP20      | 0.9805 | 1.0095 | 1.0593 | 0.8846 | 0.9835 | 0.0368 |
| LOC729591  | 0.9277 | 1.1189 | 0.9750 | 0.9123 | 0.9835 | 0.0471 |
| LOC648223  | 0.8830 | 1.1761 | 0.9623 | 0.9126 | 0.9835 | 0.0662 |
| HOXD13     | 0.9385 | 0.9961 | 0.9812 | 1.0182 | 0.9835 | 0.0168 |
| RTBDN      | 0.9810 | 1.0094 | 1.0104 | 0.9332 | 0.9835 | 0.0181 |
| PEX6       | 1.0112 | 1.0480 | 0.9908 | 0.8840 | 0.9835 | 0.0352 |
| PSEN1      | 1.0266 | 1.1135 | 1.0181 | 0.7757 | 0.9835 | 0.0725 |
| TMEM159    | 0.9374 | 1.2122 | 1.0119 | 0.7726 | 0.9835 | 0.0912 |
| SHD        | 0.9272 | 1.0473 | 0.9958 | 0.9638 | 0.9835 | 0.0255 |
| CHL1       | 0.9531 | 1.0850 | 0.9724 | 0.9236 | 0.9835 | 0.0353 |
| KIF26A     | 0.8479 | 1.3114 | 0.9694 | 0.8054 | 0.9835 | 0.1147 |
| TIPARP     | 0.8482 | 1.3143 | 0.9226 | 0.8490 | 0.9835 | 0.1116 |
| RRAD       | 0.9670 | 1.0252 | 1.0087 | 0.9332 | 0.9835 | 0.0208 |
| OR8H1      | 0.9162 | 1.0638 | 1.0491 | 0.9049 | 0.9835 | 0.0423 |
| ZNF641     | 0.9477 | 1.1227 | 1.0481 | 0.8155 | 0.9835 | 0.0665 |
| LOC729534  | 0.9411 | 1.1121 | 1.0301 | 0.8507 | 0.9835 | 0.0564 |
| LOC1001330 | 0.8647 | 0.8059 | 1.1852 | 1.0783 | 0.9835 | 0.0891 |
| LOC442546  | 0.9833 | 1.1772 | 1.0509 | 0.7228 | 0.9835 | 0.0958 |
| TSSK2      | 1.0262 | 1.0222 | 0.9597 | 0.9261 | 0.9835 | 0.0245 |
| LOC728516  | 1.0089 | 0.9919 | 1.1020 | 0.8313 | 0.9835 | 0.0562 |
| LOC649422  | 0.9387 | 1.0896 | 1.0467 | 0.8591 | 0.9835 | 0.0522 |
| LOC1001291 | 0.8628 | 1.0343 | 1.0937 | 0.9433 | 0.9835 | 0.0507 |
| DEFA1B     | 0.9639 | 1.0579 | 1.0530 | 0.8594 | 0.9835 | 0.0467 |
| LOC1001325 | 0.8771 | 1.0052 | 1.0634 | 0.9885 | 0.9835 | 0.0390 |
| HFE2       | 0.9117 | 1.0750 | 1.0189 | 0.9286 | 0.9835 | 0.0385 |
| LOC646905  | 0.9270 | 1.0562 | 1.0431 | 0.9079 | 0.9835 | 0.0384 |
| SLC44A5    | 0.9148 | 1.1434 | 1.0519 | 0.8241 | 0.9835 | 0.0709 |
| LOC1001299 | 1.0056 | 0.9948 | 1.0144 | 0.9193 | 0.9836 | 0.0218 |
| LOC1001319 | 1.0103 | 1.0351 | 1.0311 | 0.8577 | 0.9836 | 0.0423 |
| C11orf60   | 0.9310 | 1.2662 | 0.9215 | 0.8154 | 0.9836 | 0.0978 |

|            |        |        |        |        |        |        |
|------------|--------|--------|--------|--------|--------|--------|
| LOC728544  | 0.9518 | 0.9424 | 1.1411 | 0.8989 | 0.9836 | 0.0538 |
| EYA1       | 0.9143 | 1.0489 | 0.9929 | 0.9782 | 0.9836 | 0.0277 |
| SPARCL1    | 0.9511 | 1.0752 | 1.0040 | 0.9039 | 0.9836 | 0.0368 |
| LOC645448  | 0.9663 | 1.1027 | 0.9926 | 0.8726 | 0.9836 | 0.0473 |
| C5orf42    | 0.9053 | 1.0722 | 1.0173 | 0.9395 | 0.9836 | 0.0377 |
| OR11H12    | 0.9123 | 1.0908 | 1.0447 | 0.8865 | 0.9836 | 0.0498 |
| NAALADL1   | 0.9929 | 1.0482 | 0.9959 | 0.8973 | 0.9836 | 0.0314 |
| LRRC37B    | 0.9310 | 1.1044 | 1.0358 | 0.8632 | 0.9836 | 0.0537 |
| TLR1       | 0.8942 | 1.1163 | 1.0082 | 0.9157 | 0.9836 | 0.0507 |
| LOC727847  | 0.9043 | 1.0913 | 1.0236 | 0.9151 | 0.9836 | 0.0449 |
| LOC730275  | 0.9600 | 0.9921 | 0.9939 | 0.9884 | 0.9836 | 0.0080 |
| FGFR1      | 1.0060 | 0.9955 | 1.0226 | 0.9103 | 0.9836 | 0.0251 |
| PTGFRN     | 0.9510 | 1.2798 | 0.9242 | 0.7794 | 0.9836 | 0.1057 |
| LOC441737  | 0.9214 | 0.9852 | 1.0386 | 0.9892 | 0.9836 | 0.0240 |
| IGFBP1     | 0.9242 | 1.0805 | 0.9979 | 0.9319 | 0.9836 | 0.0363 |
| DDAH1      | 1.0714 | 1.2070 | 1.0342 | 0.6219 | 0.9836 | 0.1261 |
| LOC1001311 | 0.9900 | 1.0544 | 0.9210 | 0.9691 | 0.9836 | 0.0277 |
| KIR2DL2    | 0.9017 | 1.0747 | 1.0558 | 0.9023 | 0.9836 | 0.0473 |
| FLJ46552   | 1.0577 | 1.1195 | 1.0646 | 0.6928 | 0.9836 | 0.0979 |
| LRRC15     | 1.0419 | 1.1017 | 0.9304 | 0.8606 | 0.9836 | 0.0542 |
| LOC652787  | 0.9326 | 1.0373 | 1.0439 | 0.9207 | 0.9836 | 0.0330 |
| SEMA3A     | 1.0047 | 1.0811 | 1.0217 | 0.8272 | 0.9836 | 0.0547 |
| ABLIM2     | 1.0288 | 1.0214 | 1.0322 | 0.8522 | 0.9837 | 0.0439 |
| FLJ16165   | 0.8735 | 1.1263 | 1.0746 | 0.8602 | 0.9837 | 0.0683 |
| PANX1      | 0.9223 | 1.1502 | 1.0970 | 0.7652 | 0.9837 | 0.0876 |
| LOC642659  | 0.9524 | 0.9416 | 1.0908 | 0.9498 | 0.9837 | 0.0358 |
| NPS        | 0.9723 | 0.9552 | 1.0538 | 0.9533 | 0.9837 | 0.0238 |
| OR4D2      | 0.9454 | 1.0544 | 1.0564 | 0.8785 | 0.9837 | 0.0436 |
| LOC652505  | 0.9314 | 1.1929 | 0.9107 | 0.8997 | 0.9837 | 0.0700 |
| LOC154860  | 0.9057 | 1.2145 | 0.9311 | 0.8834 | 0.9837 | 0.0776 |
| TRIM74     | 1.0186 | 1.0115 | 1.0095 | 0.8951 | 0.9837 | 0.0296 |
| LOC642736  | 0.8695 | 1.0310 | 1.1813 | 0.8530 | 0.9837 | 0.0771 |
| LOC1001293 | 0.8846 | 1.0971 | 0.9929 | 0.9602 | 0.9837 | 0.0441 |
| SUV39H2    | 0.8547 | 1.2343 | 0.9169 | 0.9288 | 0.9837 | 0.0851 |
| LOC652599  | 1.0054 | 1.0103 | 1.0017 | 0.9174 | 0.9837 | 0.0222 |
| TELO2      | 1.3862 | 0.9229 | 0.8007 | 0.8251 | 0.9837 | 0.1367 |
| FAM86B2    | 0.9821 | 0.9988 | 1.0057 | 0.9481 | 0.9837 | 0.0128 |
| P2RY4      | 0.8938 | 1.1206 | 0.9882 | 0.9323 | 0.9837 | 0.0496 |
| KRT18P44   | 0.9053 | 1.0842 | 1.0065 | 0.9389 | 0.9837 | 0.0396 |
| LOC1001294 | 0.9702 | 1.0017 | 1.0631 | 0.8999 | 0.9837 | 0.0339 |
| C3orf54    | 0.9596 | 1.1224 | 0.9117 | 0.9413 | 0.9837 | 0.0473 |
| HIPK1      | 0.9616 | 1.0134 | 1.0618 | 0.8982 | 0.9837 | 0.0351 |
| KLRK1      | 0.8385 | 1.2631 | 1.0015 | 0.8318 | 0.9837 | 0.1011 |
| LOC646855  | 0.8434 | 1.1319 | 1.0867 | 0.8730 | 0.9837 | 0.0733 |
| UAP1       | 0.8899 | 1.1714 | 1.2680 | 0.6056 | 0.9837 | 0.1494 |
| LOC121006  | 0.9301 | 1.0579 | 1.0144 | 0.9326 | 0.9837 | 0.0315 |

|            |        |        |        |        |        |        |
|------------|--------|--------|--------|--------|--------|--------|
| SYT16      | 0.7730 | 1.3131 | 1.0349 | 0.8140 | 0.9838 | 0.1239 |
| LOC1001321 | 0.8270 | 1.0746 | 1.0862 | 0.9472 | 0.9838 | 0.0610 |
| LOC646268  | 0.9128 | 1.1359 | 1.0146 | 0.8718 | 0.9838 | 0.0589 |
| MEIS1      | 0.7728 | 1.1245 | 1.1642 | 0.8735 | 0.9838 | 0.0953 |
| LOC650721  | 0.9147 | 1.0654 | 1.0338 | 0.9212 | 0.9838 | 0.0386 |
| BATF3      | 0.8803 | 1.1241 | 1.0315 | 0.8992 | 0.9838 | 0.0576 |
| GPR125     | 0.8913 | 1.1509 | 0.9698 | 0.9232 | 0.9838 | 0.0580 |
| RBM8A      | 0.8395 | 1.2011 | 1.0168 | 0.8777 | 0.9838 | 0.0818 |
| RASGEF1B   | 0.9247 | 0.9904 | 1.1292 | 0.8908 | 0.9838 | 0.0527 |
| NYX        | 0.9978 | 0.9605 | 1.1461 | 0.8307 | 0.9838 | 0.0649 |
| SEC16B     | 0.9590 | 1.0842 | 0.9450 | 0.9469 | 0.9838 | 0.0336 |
| LOC646109  | 1.0481 | 1.0162 | 0.9437 | 0.9272 | 0.9838 | 0.0289 |
| FAM82A1    | 0.9532 | 0.9732 | 1.1354 | 0.8734 | 0.9838 | 0.0549 |
| LOC645805  | 0.9556 | 0.9971 | 1.0964 | 0.8861 | 0.9838 | 0.0440 |
| LOC652470  | 0.9557 | 1.1125 | 0.9296 | 0.9374 | 0.9838 | 0.0432 |
| LOC401220  | 0.8714 | 1.0667 | 1.0497 | 0.9474 | 0.9838 | 0.0458 |
| LOC646654  | 0.9051 | 1.0298 | 1.0453 | 0.9551 | 0.9838 | 0.0328 |
| FZD10      | 0.9937 | 1.1284 | 0.9327 | 0.8804 | 0.9838 | 0.0535 |
| LOC641955  | 0.9040 | 1.0526 | 1.0051 | 0.9735 | 0.9838 | 0.0312 |
| FCRL4      | 1.0022 | 0.9867 | 1.0147 | 0.9317 | 0.9838 | 0.0183 |
| CHRNA9     | 0.9463 | 1.0779 | 1.0379 | 0.8732 | 0.9838 | 0.0460 |
| SLC9A4     | 0.9763 | 1.0815 | 0.9753 | 0.9022 | 0.9838 | 0.0369 |
| LOC642265  | 0.9140 | 1.2108 | 0.9187 | 0.8918 | 0.9838 | 0.0759 |
| LOC646405  | 0.8983 | 1.1005 | 1.0263 | 0.9101 | 0.9838 | 0.0484 |
| MGC10646   | 0.9692 | 1.0795 | 0.9885 | 0.8981 | 0.9838 | 0.0373 |
| KLHDC7A    | 0.8808 | 1.1187 | 1.0389 | 0.8970 | 0.9838 | 0.0573 |
| LOC645172  | 0.9093 | 1.0122 | 1.1486 | 0.8652 | 0.9839 | 0.0630 |
| HR         | 0.9903 | 1.0257 | 1.0405 | 0.8789 | 0.9839 | 0.0365 |
| LOC652076  | 0.8731 | 1.1942 | 1.0881 | 0.7800 | 0.9839 | 0.0953 |
| BCORL1     | 0.8848 | 1.2106 | 0.8351 | 1.0048 | 0.9839 | 0.0836 |
| PDE10A     | 0.9507 | 0.9827 | 1.1053 | 0.8968 | 0.9839 | 0.0442 |
| MKRN3      | 0.9323 | 1.2597 | 0.9373 | 0.8062 | 0.9839 | 0.0968 |
| LOC401914  | 0.9766 | 1.0399 | 0.9919 | 0.9270 | 0.9839 | 0.0233 |
| LOC652142  | 0.8387 | 1.1858 | 0.9549 | 0.9560 | 0.9839 | 0.0727 |
| COL8A1     | 0.9817 | 1.0939 | 0.9749 | 0.8850 | 0.9839 | 0.0428 |
| TBX5       | 0.9709 | 1.1009 | 0.9509 | 0.9127 | 0.9839 | 0.0408 |
| SHANK2     | 0.9916 | 1.0638 | 1.0147 | 0.8654 | 0.9839 | 0.0423 |
| LOC728250  | 0.9827 | 0.9750 | 1.0001 | 0.9778 | 0.9839 | 0.0056 |
| DSCAM      | 0.8227 | 1.1889 | 1.0069 | 0.9170 | 0.9839 | 0.0780 |
| SDHAP3     | 0.9416 | 1.1281 | 0.9783 | 0.8875 | 0.9839 | 0.0516 |
| FCGR1C     | 0.9637 | 1.0652 | 0.9003 | 1.0064 | 0.9839 | 0.0348 |
| LOC642447  | 0.8923 | 1.0953 | 1.0041 | 0.9438 | 0.9839 | 0.0436 |
| LOC651849  | 0.8825 | 1.1247 | 0.9365 | 0.9919 | 0.9839 | 0.0520 |
| MIR423     | 0.8955 | 1.1224 | 1.0202 | 0.8975 | 0.9839 | 0.0546 |
| DOK2       | 0.9614 | 1.1525 | 0.9704 | 0.8513 | 0.9839 | 0.0624 |
| LOC731837  | 1.0152 | 1.0978 | 1.0015 | 0.8211 | 0.9839 | 0.0583 |

|            |        |        |        |        |        |        |
|------------|--------|--------|--------|--------|--------|--------|
| LOC648500  | 0.8802 | 1.0339 | 1.0990 | 0.9225 | 0.9839 | 0.0502 |
| PNPLA2     | 1.0595 | 1.1118 | 1.0565 | 0.7079 | 0.9839 | 0.0929 |
| LOC730994  | 0.8793 | 1.0803 | 1.0040 | 0.9721 | 0.9839 | 0.0416 |
| SH3RF3     | 0.9345 | 1.1090 | 1.0424 | 0.8498 | 0.9839 | 0.0574 |
| LOC1001327 | 0.9161 | 1.1906 | 1.0362 | 0.7929 | 0.9839 | 0.0849 |
| LOC1001305 | 0.9495 | 1.0192 | 1.0905 | 0.8765 | 0.9839 | 0.0459 |
| ANXA13     | 0.9252 | 1.0779 | 0.9525 | 0.9802 | 0.9839 | 0.0333 |
| TGM2       | 0.9340 | 1.0783 | 1.0241 | 0.8993 | 0.9839 | 0.0410 |
| WARS2      | 0.9614 | 1.0589 | 1.0380 | 0.8774 | 0.9839 | 0.0412 |
| LOC642220  | 0.9879 | 1.0889 | 0.9392 | 0.9197 | 0.9839 | 0.0378 |
| MIR651     | 0.8555 | 1.1279 | 1.0672 | 0.8852 | 0.9840 | 0.0670 |
| LOC644891  | 0.9993 | 1.1602 | 0.8793 | 0.8970 | 0.9840 | 0.0644 |
| LOC653527  | 0.8224 | 1.0505 | 1.0662 | 0.9968 | 0.9840 | 0.0559 |
| LOC1001283 | 0.9155 | 1.0828 | 1.0478 | 0.8899 | 0.9840 | 0.0478 |
| MT3        | 0.8601 | 1.1444 | 1.0564 | 0.8750 | 0.9840 | 0.0696 |
| RALY       | 0.9398 | 1.2513 | 1.0101 | 0.7347 | 0.9840 | 0.1066 |
| GPR62      | 0.9970 | 1.0347 | 0.9535 | 0.9508 | 0.9840 | 0.0199 |
| LOC1001288 | 0.9630 | 1.0896 | 0.9590 | 0.9243 | 0.9840 | 0.0363 |
| ELAVL3     | 0.9457 | 1.0964 | 1.0781 | 0.8157 | 0.9840 | 0.0654 |
| DEFB1      | 0.9255 | 1.0205 | 1.1224 | 0.8675 | 0.9840 | 0.0559 |
| LOC728831  | 0.9616 | 1.1189 | 0.9540 | 0.9014 | 0.9840 | 0.0469 |
| SLC25A24   | 0.8314 | 1.2541 | 0.9721 | 0.8784 | 0.9840 | 0.0947 |
| ZNF461     | 0.9524 | 1.1696 | 0.9795 | 0.8344 | 0.9840 | 0.0694 |
| LOC1001283 | 0.7752 | 1.1833 | 1.1502 | 0.8273 | 0.9840 | 0.1063 |
| C8orf47    | 1.0238 | 1.0782 | 1.0008 | 0.8332 | 0.9840 | 0.0528 |
| LOC92497   | 0.8928 | 1.1622 | 0.9347 | 0.9463 | 0.9840 | 0.0605 |
| SLC38A6    | 0.9128 | 1.0205 | 1.0613 | 0.9414 | 0.9840 | 0.0344 |
| LOC644064  | 0.9077 | 1.1562 | 0.8798 | 0.9923 | 0.9840 | 0.0622 |
| LRRC44     | 1.0077 | 0.9992 | 0.9712 | 0.9580 | 0.9840 | 0.0117 |
| MAP2K7     | 0.9036 | 1.1302 | 1.0363 | 0.8659 | 0.9840 | 0.0609 |
| SCN4B      | 0.9266 | 1.1986 | 0.9241 | 0.8868 | 0.9840 | 0.0721 |
| XPNPEP3    | 0.9318 | 1.1857 | 1.1262 | 0.6924 | 0.9840 | 0.1113 |
| CSN2       | 0.8925 | 1.1194 | 1.0418 | 0.8823 | 0.9840 | 0.0580 |
| INMT       | 0.9613 | 1.0292 | 0.9953 | 0.9502 | 0.9840 | 0.0179 |
| FLJ12334   | 0.9140 | 1.0323 | 0.9869 | 1.0029 | 0.9840 | 0.0252 |
| GLIS1      | 0.9588 | 1.0382 | 0.9566 | 0.9825 | 0.9840 | 0.0190 |
| ALS2CR12   | 0.9962 | 1.2158 | 0.9920 | 0.7321 | 0.9840 | 0.0989 |
| LOC653616  | 0.8857 | 1.1428 | 0.8769 | 1.0307 | 0.9840 | 0.0636 |
| OR2T10     | 1.0159 | 0.9825 | 0.9760 | 0.9617 | 0.9840 | 0.0115 |
| GC         | 0.8578 | 1.0772 | 1.1108 | 0.8903 | 0.9840 | 0.0642 |
| LOC1001317 | 0.9069 | 1.0635 | 1.0159 | 0.9499 | 0.9841 | 0.0347 |
| TXLNB      | 0.9858 | 1.1149 | 0.9454 | 0.8901 | 0.9841 | 0.0478 |
| C1orf88    | 0.9407 | 1.0406 | 1.0733 | 0.8817 | 0.9841 | 0.0443 |
| UNC13C     | 0.9430 | 1.0613 | 1.0350 | 0.8970 | 0.9841 | 0.0386 |
| LOC730291  | 0.9868 | 0.9849 | 1.0144 | 0.9502 | 0.9841 | 0.0132 |
| MMP23A     | 0.9130 | 1.0430 | 1.0279 | 0.9524 | 0.9841 | 0.0309 |



|            |        |        |        |        |        |        |
|------------|--------|--------|--------|--------|--------|--------|
| ALPP       | 0.8182 | 1.3786 | 0.9654 | 0.7741 | 0.9841 | 0.1377 |
| F2         | 0.9185 | 1.0365 | 0.9826 | 0.9988 | 0.9841 | 0.0246 |
| UGT2A2     | 0.9360 | 0.9720 | 1.0589 | 0.9694 | 0.9841 | 0.0262 |
| ANKS1B     | 0.9506 | 1.1033 | 0.9330 | 0.9494 | 0.9841 | 0.0399 |
| TSPY2      | 0.9526 | 1.1390 | 0.8857 | 0.9591 | 0.9841 | 0.0542 |
| PRB3       | 0.8774 | 1.1745 | 1.0777 | 0.8069 | 0.9841 | 0.0855 |
| LOC442229  | 0.9056 | 1.0821 | 1.0225 | 0.9263 | 0.9841 | 0.0414 |
| SLC26A8    | 0.9712 | 1.0663 | 1.0175 | 0.8814 | 0.9841 | 0.0393 |
| ANAPC10    | 0.7357 | 1.2866 | 1.1231 | 0.7911 | 0.9841 | 0.1322 |
| SLC17A4    | 0.9288 | 1.0729 | 1.2269 | 0.7079 | 0.9841 | 0.1104 |
| LOC648672  | 0.9081 | 1.1156 | 1.0790 | 0.8338 | 0.9841 | 0.0675 |
| KCNH5      | 0.9630 | 1.0833 | 1.0018 | 0.8884 | 0.9841 | 0.0406 |
| ADSSL1     | 0.8610 | 1.2167 | 0.9783 | 0.8805 | 0.9841 | 0.0817 |
| ASPN       | 0.9556 | 0.9854 | 1.0666 | 0.9289 | 0.9841 | 0.0298 |
| XKR9       | 0.9248 | 1.1102 | 0.9981 | 0.9035 | 0.9841 | 0.0466 |
| LOC642921  | 0.8610 | 1.0559 | 1.0520 | 0.9676 | 0.9841 | 0.0458 |
| LOC1001317 | 0.9204 | 1.0288 | 1.0622 | 0.9252 | 0.9841 | 0.0361 |
| LOC441034  | 0.9328 | 1.0925 | 1.0939 | 0.8174 | 0.9841 | 0.0672 |
| MIR1282    | 0.8978 | 0.9931 | 0.9139 | 1.1318 | 0.9841 | 0.0534 |
| SLC36A3    | 0.9730 | 1.0344 | 1.0111 | 0.9182 | 0.9841 | 0.0254 |
| CA6        | 0.9928 | 1.0957 | 0.9594 | 0.8887 | 0.9842 | 0.0430 |
| LOC1001334 | 0.9097 | 1.2078 | 0.9038 | 0.9154 | 0.9842 | 0.0746 |
| SHC3       | 1.0574 | 1.0341 | 0.9544 | 0.8908 | 0.9842 | 0.0381 |
| SPINT4     | 0.9411 | 1.0945 | 0.9627 | 0.9384 | 0.9842 | 0.0372 |
| G6PC2      | 0.9485 | 1.0427 | 0.9959 | 0.9496 | 0.9842 | 0.0224 |
| DDX25      | 0.9627 | 1.0275 | 1.0371 | 0.9095 | 0.9842 | 0.0299 |
| CYP4Z1     | 0.9232 | 1.0757 | 1.0119 | 0.9259 | 0.9842 | 0.0368 |
| STX1A      | 1.0169 | 1.1429 | 0.9558 | 0.8212 | 0.9842 | 0.0669 |
| FCGR3A     | 0.8848 | 1.1191 | 1.0604 | 0.8725 | 0.9842 | 0.0622 |
| LOC652745  | 0.9010 | 1.1228 | 1.0431 | 0.8699 | 0.9842 | 0.0596 |
| LOC1001312 | 0.9439 | 1.0121 | 1.0150 | 0.9659 | 0.9842 | 0.0175 |
| PQLC2      | 0.9671 | 1.0708 | 0.9873 | 0.9116 | 0.9842 | 0.0330 |
| SH3TC1     | 1.0423 | 1.0848 | 0.9923 | 0.8174 | 0.9842 | 0.0587 |
| ZBED2      | 0.9515 | 1.0000 | 1.0332 | 0.9521 | 0.9842 | 0.0199 |
| C4orf12    | 0.9329 | 1.0616 | 1.0185 | 0.9238 | 0.9842 | 0.0335 |
| ADIPOR2    | 0.8842 | 1.3574 | 0.9844 | 0.7109 | 0.9842 | 0.1366 |
| CCR2       | 0.9229 | 1.0812 | 1.0232 | 0.9096 | 0.9842 | 0.0411 |
| SNORD116-1 | 0.9226 | 1.1522 | 0.9984 | 0.8637 | 0.9842 | 0.0624 |
| LCA5L      | 0.9426 | 1.0938 | 1.0012 | 0.8992 | 0.9842 | 0.0421 |
| POMC       | 0.9036 | 1.0898 | 0.9989 | 0.9446 | 0.9842 | 0.0402 |
| LOC653366  | 0.9812 | 1.0978 | 1.0228 | 0.8352 | 0.9842 | 0.0552 |
| SERPINA1   | 0.9495 | 1.0248 | 1.0524 | 0.9102 | 0.9842 | 0.0329 |
| LRCH2      | 0.9906 | 1.0585 | 0.9494 | 0.9384 | 0.9842 | 0.0272 |
| GOSR1      | 0.8495 | 1.2020 | 1.0620 | 0.8235 | 0.9842 | 0.0901 |
| LOC647493  | 0.8943 | 1.0249 | 1.0906 | 0.9273 | 0.9843 | 0.0450 |
| KHDRBS2    | 0.9709 | 1.0477 | 0.9979 | 0.9206 | 0.9843 | 0.0265 |

|            |        |        |        |        |        |        |
|------------|--------|--------|--------|--------|--------|--------|
| ROS1       | 0.9343 | 0.9536 | 1.1233 | 0.9258 | 0.9843 | 0.0467 |
| LOC644593  | 0.9491 | 1.3616 | 0.8084 | 0.8178 | 0.9843 | 0.1298 |
| GRRP1      | 0.8910 | 1.0660 | 1.0530 | 0.9270 | 0.9843 | 0.0441 |
| FLJ37512   | 0.9361 | 1.0325 | 1.1228 | 0.8457 | 0.9843 | 0.0599 |
| LOC1001295 | 0.9518 | 0.9682 | 1.0567 | 0.9603 | 0.9843 | 0.0244 |
| LOC650036  | 1.0191 | 1.0859 | 0.9462 | 0.8859 | 0.9843 | 0.0435 |
| ARHGAP6    | 0.8897 | 1.2074 | 0.9988 | 0.8412 | 0.9843 | 0.0813 |
| LOC92017   | 0.9678 | 1.1402 | 0.9626 | 0.8665 | 0.9843 | 0.0570 |
| MIR494     | 1.0454 | 1.0522 | 0.9877 | 0.8519 | 0.9843 | 0.0464 |
| FCGR1B     | 0.9587 | 1.0582 | 1.0293 | 0.8909 | 0.9843 | 0.0375 |
| MIR1-2     | 0.9235 | 1.1167 | 0.9878 | 0.9092 | 0.9843 | 0.0473 |
| LOC391859  | 0.9482 | 1.1849 | 0.8991 | 0.9050 | 0.9843 | 0.0678 |
| ALPK1      | 0.9068 | 1.0916 | 1.0677 | 0.8711 | 0.9843 | 0.0557 |
| ESP33      | 0.9195 | 1.0107 | 1.0373 | 0.9698 | 0.9843 | 0.0257 |
| LOC642939  | 0.9433 | 1.1529 | 0.8993 | 0.9417 | 0.9843 | 0.0571 |
| LOC647025  | 1.0248 | 1.1508 | 0.8716 | 0.8900 | 0.9843 | 0.0652 |
| LOC1001309 | 0.9948 | 0.9575 | 1.0376 | 0.9473 | 0.9843 | 0.0205 |
| LOC644954  | 0.8531 | 1.1127 | 0.9834 | 0.9880 | 0.9843 | 0.0530 |
| LOC222699  | 0.9169 | 1.1786 | 0.8891 | 0.9526 | 0.9843 | 0.0660 |
| LOC648405  | 1.0372 | 1.0307 | 1.0004 | 0.8690 | 0.9843 | 0.0393 |
| MBOAT2     | 0.8907 | 1.3204 | 1.0111 | 0.7151 | 0.9843 | 0.1274 |
| MPZL3      | 0.7811 | 1.3650 | 0.9469 | 0.8444 | 0.9843 | 0.1314 |
| ODZ1       | 0.9164 | 1.0760 | 0.9953 | 0.9496 | 0.9843 | 0.0346 |
| LOC653554  | 1.0530 | 0.9782 | 1.0299 | 0.8762 | 0.9843 | 0.0393 |
| COL23A1    | 0.9319 | 1.0188 | 0.9914 | 0.9951 | 0.9843 | 0.0185 |
| FAM175A    | 0.9490 | 1.1446 | 1.0963 | 0.7474 | 0.9843 | 0.0893 |
| ZNF623     | 0.9803 | 1.1330 | 0.9463 | 0.8778 | 0.9843 | 0.0539 |
| SEMA3E     | 0.8042 | 1.1024 | 1.2462 | 0.7845 | 0.9843 | 0.1136 |
| ENTHD1     | 0.9510 | 1.0918 | 0.9946 | 0.8999 | 0.9843 | 0.0407 |
| OR5K4      | 1.0622 | 1.0907 | 0.9360 | 0.8485 | 0.9843 | 0.0564 |
| OR6K6      | 0.8761 | 1.0174 | 1.2088 | 0.8351 | 0.9843 | 0.0844 |
| LOC283553  | 1.0366 | 1.1233 | 0.9791 | 0.7984 | 0.9843 | 0.0687 |
| LOC645537  | 0.9497 | 1.1120 | 0.9357 | 0.9401 | 0.9843 | 0.0426 |
| RYR3       | 1.0580 | 1.0238 | 0.9843 | 0.8714 | 0.9844 | 0.0405 |
| LOC643901  | 1.0398 | 1.0615 | 0.9803 | 0.8559 | 0.9844 | 0.0462 |
| LOC1001341 | 0.9932 | 1.0061 | 0.9858 | 0.9523 | 0.9844 | 0.0115 |
| ZNF80      | 0.9015 | 1.1523 | 0.9975 | 0.8861 | 0.9844 | 0.0612 |
| LOC1001283 | 0.9137 | 1.1085 | 1.0294 | 0.8859 | 0.9844 | 0.0517 |
| PLA2G1B    | 0.9653 | 1.1248 | 1.0396 | 0.8077 | 0.9844 | 0.0673 |
| SLC41A2    | 0.8801 | 1.3643 | 0.9531 | 0.7400 | 0.9844 | 0.1341 |
| KCNN4      | 0.9205 | 1.1522 | 0.9958 | 0.8691 | 0.9844 | 0.0617 |
| PYY2       | 0.9724 | 1.0186 | 1.0426 | 0.9039 | 0.9844 | 0.0305 |
| LAMB4      | 0.8705 | 1.1509 | 0.9321 | 0.9839 | 0.9844 | 0.0602 |
| LOC1001311 | 0.9623 | 1.1003 | 0.9636 | 0.9113 | 0.9844 | 0.0405 |
| LHFPL3     | 0.9569 | 1.0172 | 1.0305 | 0.9330 | 0.9844 | 0.0234 |
| TIMM13     | 1.0434 | 1.1031 | 0.9177 | 0.8735 | 0.9844 | 0.0535 |

|            |        |        |        |        |        |        |
|------------|--------|--------|--------|--------|--------|--------|
| LOC651196  | 0.7474 | 1.1671 | 0.9925 | 1.0306 | 0.9844 | 0.0874 |
| PSEN2      | 0.9902 | 1.1946 | 1.0945 | 0.6583 | 0.9844 | 0.1164 |
| S1PR1      | 0.9259 | 0.9927 | 1.0705 | 0.9485 | 0.9844 | 0.0319 |
| NKX2-5     | 0.9207 | 1.0976 | 0.9604 | 0.9589 | 0.9844 | 0.0388 |
| PCDHA5     | 0.9012 | 1.1022 | 1.0253 | 0.9090 | 0.9844 | 0.0484 |
| BIRC7      | 0.9154 | 1.0770 | 1.0123 | 0.9330 | 0.9844 | 0.0374 |
| ZNF628     | 0.9291 | 1.0416 | 0.8887 | 1.0784 | 0.9844 | 0.0450 |
| LOC649812  | 0.9285 | 1.0273 | 1.0967 | 0.8852 | 0.9844 | 0.0478 |
| OR1L1      | 0.8636 | 1.0908 | 1.1362 | 0.8471 | 0.9844 | 0.0752 |
| DUOXA1     | 1.0411 | 1.1075 | 0.9655 | 0.8235 | 0.9844 | 0.0610 |
| IL9        | 1.0163 | 0.9712 | 1.0273 | 0.9230 | 0.9844 | 0.0238 |
| FGFR3      | 0.9188 | 1.1691 | 1.0194 | 0.8304 | 0.9844 | 0.0727 |
| PTH        | 0.9215 | 1.0663 | 1.0577 | 0.8922 | 0.9844 | 0.0452 |
| OR51F2     | 1.0011 | 1.0509 | 0.9969 | 0.8889 | 0.9844 | 0.0341 |
| MUC15      | 0.8826 | 1.2018 | 0.9234 | 0.9299 | 0.9844 | 0.0732 |
| LOC642987  | 0.9853 | 0.7998 | 1.0728 | 1.0798 | 0.9844 | 0.0652 |
| LOC151300  | 0.8752 | 1.1489 | 1.0125 | 0.9013 | 0.9844 | 0.0624 |
| LOC729878  | 0.9357 | 1.1171 | 0.9799 | 0.9051 | 0.9844 | 0.0468 |
| ANGPTL3    | 0.9622 | 1.0947 | 0.9956 | 0.8854 | 0.9844 | 0.0434 |
| TAF9L      | 0.8988 | 1.0861 | 1.3509 | 0.6020 | 0.9845 | 0.1577 |
| LOC1001334 | 0.9952 | 1.0591 | 1.0133 | 0.8702 | 0.9845 | 0.0404 |
| C17orf67   | 0.9077 | 1.1414 | 0.9724 | 0.9163 | 0.9845 | 0.0542 |
| SLC25A23   | 0.8346 | 1.2795 | 1.0617 | 0.7620 | 0.9845 | 0.1173 |
| CECR1      | 0.8868 | 1.1316 | 1.0209 | 0.8986 | 0.9845 | 0.0577 |
| LOC1001314 | 0.8251 | 1.1969 | 1.0808 | 0.8351 | 0.9845 | 0.0923 |
| OR5V1      | 0.8940 | 1.0797 | 0.9935 | 0.9706 | 0.9845 | 0.0382 |
| LOC645701  | 0.8251 | 1.0937 | 1.0473 | 0.9718 | 0.9845 | 0.0588 |
| GYPA       | 0.8803 | 1.1175 | 0.9718 | 0.9683 | 0.9845 | 0.0491 |
| KRTAP12-1  | 0.8172 | 1.2339 | 1.0479 | 0.8390 | 0.9845 | 0.0981 |
| LOC654101  | 0.9458 | 1.0144 | 1.0797 | 0.8981 | 0.9845 | 0.0397 |
| ZFAND2A    | 0.9218 | 1.3593 | 0.9479 | 0.7091 | 0.9845 | 0.1359 |
| LOC652009  | 0.9786 | 1.0574 | 0.9493 | 0.9527 | 0.9845 | 0.0252 |
| HSGT1      | 0.9721 | 1.2515 | 0.9180 | 0.7964 | 0.9845 | 0.0963 |
| PRPF39     | 0.8936 | 1.1161 | 1.0993 | 0.8290 | 0.9845 | 0.0724 |
| MIR548L    | 0.9832 | 0.9960 | 1.0093 | 0.9495 | 0.9845 | 0.0128 |
| SIRT3      | 0.9973 | 0.9928 | 1.0267 | 0.9213 | 0.9845 | 0.0224 |
| TMEM115    | 0.9256 | 1.2872 | 0.9302 | 0.7951 | 0.9845 | 0.1056 |
| RBMV1A3P   | 0.9098 | 1.1252 | 0.9861 | 0.9170 | 0.9845 | 0.0499 |
| LOC651008  | 0.9227 | 1.0493 | 1.0724 | 0.8937 | 0.9845 | 0.0447 |
| ERVK6      | 0.9160 | 1.0060 | 1.0383 | 0.9779 | 0.9845 | 0.0260 |
| LRCH1      | 0.9706 | 0.9994 | 1.0585 | 0.9096 | 0.9845 | 0.0310 |
| LOC645330  | 0.9129 | 1.0969 | 1.0194 | 0.9089 | 0.9845 | 0.0454 |
| RNY5       | 0.9098 | 1.1578 | 1.0826 | 0.7879 | 0.9846 | 0.0836 |
| OR56A4     | 0.9713 | 1.0813 | 0.9059 | 0.9798 | 0.9846 | 0.0362 |
| RAB41      | 1.0079 | 1.0094 | 1.0248 | 0.8961 | 0.9846 | 0.0297 |
| MIR212     | 0.8685 | 1.1669 | 1.0890 | 0.8138 | 0.9846 | 0.0851 |

|            |        |        |        |        |        |        |
|------------|--------|--------|--------|--------|--------|--------|
| IGDCC3     | 0.9685 | 1.0441 | 1.0120 | 0.9136 | 0.9846 | 0.0283 |
| LOC284352  | 0.8723 | 1.1152 | 1.0298 | 0.9210 | 0.9846 | 0.0546 |
| LOC1001267 | 0.9189 | 1.0773 | 1.0118 | 0.9303 | 0.9846 | 0.0372 |
| DUXA       | 0.9664 | 1.0768 | 1.0153 | 0.8798 | 0.9846 | 0.0416 |
| PCDHGB1    | 0.9074 | 1.1243 | 1.0050 | 0.9016 | 0.9846 | 0.0523 |
| MBNL3      | 0.9765 | 1.0502 | 1.0209 | 0.8907 | 0.9846 | 0.0348 |
| LOC728465  | 0.8347 | 1.2251 | 1.0813 | 0.7972 | 0.9846 | 0.1020 |
| CCDC107    | 0.9447 | 1.2340 | 0.9092 | 0.8505 | 0.9846 | 0.0854 |
| C10orf82   | 0.9539 | 1.0757 | 1.0190 | 0.8898 | 0.9846 | 0.0402 |
| LOC728518  | 1.0072 | 1.0398 | 0.9443 | 0.9471 | 0.9846 | 0.0234 |
| LOC1001281 | 0.9486 | 1.0770 | 0.9971 | 0.9157 | 0.9846 | 0.0350 |
| PLEKHG5    | 0.9511 | 1.0406 | 1.0388 | 0.9080 | 0.9846 | 0.0330 |
| ZNF534     | 0.9720 | 1.0252 | 1.0033 | 0.9379 | 0.9846 | 0.0190 |
| LOC643669  | 1.0002 | 1.0732 | 1.0212 | 0.8439 | 0.9846 | 0.0494 |
| TNFAIP3    | 0.8762 | 1.1629 | 1.0372 | 0.8622 | 0.9846 | 0.0715 |
| BHLHB4     | 0.9073 | 1.1701 | 1.0041 | 0.8570 | 0.9846 | 0.0689 |
| LOC1001293 | 0.8877 | 1.1254 | 1.0281 | 0.8973 | 0.9846 | 0.0568 |
| SOX17      | 1.0160 | 1.0221 | 0.9879 | 0.9125 | 0.9846 | 0.0252 |
| DNAJB8     | 1.0033 | 1.0039 | 0.9493 | 0.9821 | 0.9846 | 0.0128 |
| LOC441709  | 0.9861 | 1.0059 | 1.0232 | 0.9233 | 0.9846 | 0.0218 |
| KLF12      | 0.9642 | 1.0643 | 1.0126 | 0.8975 | 0.9846 | 0.0355 |
| NHLRC4     | 0.8089 | 1.1996 | 1.0249 | 0.9052 | 0.9846 | 0.0842 |
| TNK1       | 0.9240 | 0.9927 | 0.9993 | 1.0226 | 0.9846 | 0.0212 |
| UFC1       | 0.8028 | 1.4304 | 1.0857 | 0.6197 | 0.9846 | 0.1768 |
| SNORA5C    | 0.8653 | 1.1668 | 0.9937 | 0.9128 | 0.9847 | 0.0662 |
| SLC24A4    | 0.8987 | 1.0808 | 0.9855 | 0.9736 | 0.9847 | 0.0374 |
| GDAP1      | 0.7925 | 1.2240 | 1.0796 | 0.8425 | 0.9847 | 0.1014 |
| LOC1001322 | 0.9316 | 1.1162 | 1.0350 | 0.8559 | 0.9847 | 0.0572 |
| CYP17A1    | 0.9905 | 1.0882 | 0.9505 | 0.9095 | 0.9847 | 0.0383 |
| CSMD3      | 0.9745 | 1.0630 | 0.9820 | 0.9191 | 0.9847 | 0.0297 |
| LOC1001319 | 0.9322 | 1.1496 | 1.0045 | 0.8524 | 0.9847 | 0.0631 |
| MIR769     | 0.9997 | 1.0534 | 1.0127 | 0.8728 | 0.9847 | 0.0390 |
| TSPAN4     | 0.8291 | 1.2794 | 1.0024 | 0.8278 | 0.9847 | 0.1065 |
| LOC1001333 | 0.8451 | 1.1293 | 1.0894 | 0.8749 | 0.9847 | 0.0727 |
| LOC647247  | 1.0010 | 0.9654 | 0.9996 | 0.9728 | 0.9847 | 0.0091 |
| MRGPRF     | 0.9751 | 1.0520 | 0.9869 | 0.9247 | 0.9847 | 0.0262 |
| LOC645070  | 0.9799 | 1.0943 | 0.9789 | 0.8856 | 0.9847 | 0.0427 |
| LOC642922  | 0.9039 | 1.0669 | 1.0782 | 0.8897 | 0.9847 | 0.0509 |
| LOC647844  | 0.9536 | 1.0023 | 0.9973 | 0.9856 | 0.9847 | 0.0110 |
| LOC652160  | 1.2004 | 0.9997 | 0.9832 | 0.7556 | 0.9847 | 0.0909 |
| C20orf54   | 0.9542 | 1.1198 | 0.9857 | 0.8792 | 0.9847 | 0.0502 |
| MIR29B1    | 0.9217 | 1.1375 | 1.0842 | 0.7955 | 0.9847 | 0.0780 |
| FCRL6      | 0.9649 | 1.0191 | 1.0798 | 0.8751 | 0.9847 | 0.0434 |
| RDH5       | 1.0283 | 1.1178 | 0.9188 | 0.8740 | 0.9847 | 0.0549 |
| LOC650755  | 0.9369 | 0.9974 | 1.0034 | 1.0012 | 0.9847 | 0.0160 |
| LOC389633  | 1.0039 | 1.1351 | 0.9992 | 0.8007 | 0.9847 | 0.0689 |

|            |        |        |        |        |        |        |
|------------|--------|--------|--------|--------|--------|--------|
| OR2F1      | 0.8322 | 1.0264 | 1.1340 | 0.9463 | 0.9847 | 0.0637 |
| FOXC1      | 0.8016 | 1.1445 | 1.0753 | 0.9175 | 0.9847 | 0.0773 |
| LOC727722  | 0.9760 | 1.1170 | 0.9359 | 0.9101 | 0.9847 | 0.0461 |
| LOC643120  | 0.9106 | 1.0623 | 1.0021 | 0.9640 | 0.9847 | 0.0319 |
| LOC653498  | 0.8717 | 1.1153 | 1.0194 | 0.9325 | 0.9847 | 0.0530 |
| LOC1001294 | 0.9277 | 1.0358 | 1.0035 | 0.9719 | 0.9847 | 0.0230 |
| TCEAL7     | 0.8852 | 1.0458 | 1.0512 | 0.9568 | 0.9848 | 0.0396 |
| CACNG3     | 0.9595 | 1.0392 | 1.0660 | 0.8743 | 0.9848 | 0.0432 |
| LOC131054  | 0.8739 | 1.0412 | 0.9825 | 1.0414 | 0.9848 | 0.0395 |
| IL13       | 1.0055 | 1.0578 | 1.0431 | 0.8327 | 0.9848 | 0.0519 |
| BPY2C      | 0.9643 | 1.0655 | 0.9815 | 0.9278 | 0.9848 | 0.0291 |
| FDXR       | 0.8980 | 1.1597 | 0.9732 | 0.9080 | 0.9848 | 0.0607 |
| LOC646296  | 0.9538 | 1.1583 | 0.9836 | 0.8433 | 0.9848 | 0.0652 |
| LOC57399   | 0.9066 | 1.0716 | 1.0456 | 0.9152 | 0.9848 | 0.0430 |
| OTOF       | 0.9238 | 1.0257 | 1.0377 | 0.9519 | 0.9848 | 0.0278 |
| ABCB5      | 0.9821 | 0.9768 | 1.0154 | 0.9648 | 0.9848 | 0.0108 |
| LOC644112  | 0.9587 | 1.0693 | 0.9889 | 0.9223 | 0.9848 | 0.0313 |
| SNORD50A   | 0.9168 | 0.9650 | 1.1423 | 0.9151 | 0.9848 | 0.0538 |
| LOC401007  | 0.9562 | 1.0293 | 1.0682 | 0.8855 | 0.9848 | 0.0404 |
| LOC644215  | 0.9398 | 1.1055 | 0.9446 | 0.9493 | 0.9848 | 0.0403 |
| LOC1001246 | 0.9255 | 1.0394 | 1.1159 | 0.8584 | 0.9848 | 0.0575 |
| ITPK1      | 0.9032 | 1.1619 | 1.0542 | 0.8200 | 0.9848 | 0.0764 |
| MIR665     | 0.8807 | 1.2903 | 0.9604 | 0.8078 | 0.9848 | 0.1065 |
| C9orf24    | 0.9353 | 1.1146 | 0.9777 | 0.9117 | 0.9848 | 0.0454 |
| TLR6       | 0.9545 | 1.0780 | 1.0034 | 0.9033 | 0.9848 | 0.0372 |
| LOC1001278 | 0.9352 | 1.0770 | 1.0047 | 0.9224 | 0.9848 | 0.0356 |
| LOC730194  | 1.0177 | 0.9780 | 0.9268 | 1.0167 | 0.9848 | 0.0214 |
| OR51L1     | 0.9462 | 0.9575 | 0.9808 | 1.0548 | 0.9848 | 0.0244 |
| LOC644912  | 0.9469 | 1.0246 | 1.0661 | 0.9017 | 0.9848 | 0.0371 |
| ADAMTSL2   | 0.8635 | 1.1041 | 1.0021 | 0.9697 | 0.9848 | 0.0496 |
| LOC389671  | 1.0611 | 1.0377 | 0.9086 | 0.9319 | 0.9848 | 0.0379 |
| CAPNS2     | 0.9423 | 1.0995 | 0.8608 | 1.0367 | 0.9848 | 0.0525 |
| ITGB6      | 0.9717 | 1.0745 | 0.9989 | 0.8943 | 0.9848 | 0.0372 |
| LOC644563  | 0.9543 | 1.3046 | 1.0247 | 0.6558 | 0.9848 | 0.1332 |
| LOC643246  | 0.8594 | 1.1549 | 0.9029 | 1.0222 | 0.9848 | 0.0663 |
| FLJ44451   | 0.9030 | 1.1522 | 1.0381 | 0.8461 | 0.9848 | 0.0688 |
| TTC21B     | 0.9647 | 1.1161 | 1.0070 | 0.8516 | 0.9849 | 0.0547 |
| ZBED4      | 0.9663 | 1.2966 | 0.8762 | 0.8004 | 0.9849 | 0.1093 |
| LOC1001328 | 0.9318 | 1.1516 | 0.9673 | 0.8888 | 0.9849 | 0.0578 |
| COL4A1     | 0.9283 | 1.0745 | 1.0145 | 0.9222 | 0.9849 | 0.0366 |
| UBLCP1     | 0.9904 | 1.0601 | 1.1361 | 0.7528 | 0.9849 | 0.0829 |
| TMPRSS11A  | 0.9485 | 1.0742 | 1.0341 | 0.8827 | 0.9849 | 0.0430 |
| LOC643213  | 0.9136 | 1.0505 | 1.0098 | 0.9656 | 0.9849 | 0.0294 |
| CCDC149    | 0.9343 | 1.1637 | 0.8163 | 1.0252 | 0.9849 | 0.0734 |
| LOC1001312 | 0.9958 | 1.0715 | 0.9477 | 0.9245 | 0.9849 | 0.0325 |
| LOC644231  | 0.8646 | 1.0272 | 1.0839 | 0.9639 | 0.9849 | 0.0470 |

|            |        |        |        |        |        |        |
|------------|--------|--------|--------|--------|--------|--------|
| LOC646581  | 0.9174 | 1.0576 | 1.0030 | 0.9616 | 0.9849 | 0.0299 |
| LOC732434  | 0.8718 | 0.9526 | 1.1446 | 0.9706 | 0.9849 | 0.0574 |
| FBXO22OS   | 0.9059 | 1.0369 | 1.0864 | 0.9104 | 0.9849 | 0.0455 |
| FAM181A    | 0.9887 | 1.0819 | 0.9411 | 0.9280 | 0.9849 | 0.0349 |
| LOC651568  | 0.8536 | 1.1350 | 1.0615 | 0.8895 | 0.9849 | 0.0675 |
| LOC651986  | 0.9504 | 1.0105 | 1.0268 | 0.9519 | 0.9849 | 0.0198 |
| TTLL9      | 0.8954 | 1.0951 | 0.9854 | 0.9638 | 0.9849 | 0.0414 |
| C4orf28    | 0.8046 | 1.2096 | 1.0853 | 0.8400 | 0.9849 | 0.0975 |
| PAQR9      | 1.0221 | 1.0738 | 0.9958 | 0.8480 | 0.9849 | 0.0484 |
| LOC644427  | 0.9917 | 1.0017 | 1.0381 | 0.9081 | 0.9849 | 0.0275 |
| PLSCR5     | 0.9945 | 1.1000 | 0.9861 | 0.8591 | 0.9849 | 0.0493 |
| TAAR1      | 0.9333 | 1.0804 | 0.9878 | 0.9381 | 0.9849 | 0.0341 |
| LOC257396  | 0.6854 | 1.2985 | 1.1844 | 0.7713 | 0.9849 | 0.1510 |
| LOC646299  | 0.9518 | 1.0503 | 1.0702 | 0.8673 | 0.9849 | 0.0470 |
| YTHDF3     | 0.9631 | 1.1684 | 1.0608 | 0.7474 | 0.9849 | 0.0896 |
| LOC1001327 | 0.9503 | 1.0085 | 1.0187 | 0.9622 | 0.9849 | 0.0169 |
| LOC650787  | 0.9757 | 1.0395 | 1.0589 | 0.8656 | 0.9849 | 0.0436 |
| IZUMO1     | 0.8943 | 1.0252 | 0.9288 | 1.0914 | 0.9849 | 0.0450 |
| HRSP12     | 0.8361 | 1.4278 | 0.9690 | 0.7069 | 0.9849 | 0.1570 |
| LOC644504  | 0.9142 | 0.9995 | 1.0300 | 0.9960 | 0.9849 | 0.0248 |
| CNTNAP4    | 0.9255 | 1.0339 | 0.9720 | 1.0082 | 0.9849 | 0.0235 |
| SNAI1      | 1.0169 | 1.0117 | 1.0000 | 0.9111 | 0.9849 | 0.0249 |
| TEX12      | 0.9501 | 1.0421 | 1.1420 | 0.8056 | 0.9849 | 0.0715 |
| SOX2OT     | 0.8947 | 0.9682 | 1.0842 | 0.9926 | 0.9849 | 0.0391 |
| LOC648054  | 0.9566 | 1.0727 | 1.0865 | 0.8240 | 0.9849 | 0.0610 |
| LOC440225  | 0.9593 | 1.0581 | 0.9850 | 0.9374 | 0.9849 | 0.0262 |
| LOC645048  | 0.9884 | 1.0589 | 0.9686 | 0.9238 | 0.9849 | 0.0281 |
| PPARA      | 0.9877 | 1.0656 | 0.9719 | 0.9146 | 0.9849 | 0.0311 |
| LOC1001289 | 0.9071 | 1.0793 | 0.9696 | 0.9838 | 0.9849 | 0.0356 |
| FLJ45974   | 0.8448 | 1.0983 | 1.1652 | 0.8314 | 0.9849 | 0.0859 |
| FLJ41352   | 0.9598 | 1.0880 | 0.9622 | 0.9298 | 0.9849 | 0.0351 |
| C1QTNF1    | 0.8853 | 1.0461 | 1.0265 | 0.9819 | 0.9850 | 0.0358 |
| PCDHGB8P   | 1.0188 | 1.1097 | 0.9053 | 0.9060 | 0.9850 | 0.0494 |
| SNX18      | 0.8678 | 1.1606 | 0.9957 | 0.9158 | 0.9850 | 0.0642 |
| ANKRD20B   | 0.9779 | 1.0829 | 0.9916 | 0.8875 | 0.9850 | 0.0400 |
| HSD11B1    | 0.9279 | 1.0627 | 1.0279 | 0.9213 | 0.9850 | 0.0356 |
| OR2A42     | 0.9297 | 1.1255 | 0.9771 | 0.9076 | 0.9850 | 0.0490 |
| AP2S1      | 0.9756 | 1.2017 | 0.9854 | 0.7772 | 0.9850 | 0.0867 |
| EXD3       | 0.9435 | 1.0510 | 0.9812 | 0.9642 | 0.9850 | 0.0233 |
| LOC642933  | 0.9743 | 1.0408 | 1.0572 | 0.8676 | 0.9850 | 0.0430 |
| LOC153328  | 0.9661 | 1.0901 | 1.0611 | 0.8226 | 0.9850 | 0.0603 |
| LOC442057  | 0.8639 | 1.0676 | 0.9569 | 1.0516 | 0.9850 | 0.0472 |
| LOC152084  | 1.0236 | 1.0005 | 1.0517 | 0.8641 | 0.9850 | 0.0416 |
| CYS1       | 0.9605 | 1.1418 | 0.9921 | 0.8455 | 0.9850 | 0.0610 |
| LOC643662  | 0.8850 | 1.0236 | 1.0907 | 0.9407 | 0.9850 | 0.0453 |
| DEPDC4     | 1.0000 | 1.0761 | 0.9672 | 0.8967 | 0.9850 | 0.0372 |

|            |        |        |        |        |        |        |
|------------|--------|--------|--------|--------|--------|--------|
| HOXD9      | 0.8521 | 1.1482 | 0.9728 | 0.9668 | 0.9850 | 0.0611 |
| SLC23A2    | 0.9162 | 1.1107 | 0.9932 | 0.9199 | 0.9850 | 0.0455 |
| LOC729378  | 0.8781 | 1.0718 | 0.9658 | 1.0243 | 0.9850 | 0.0417 |
| ZBTB32     | 0.8529 | 1.1094 | 1.0763 | 0.9014 | 0.9850 | 0.0634 |
| LOC643402  | 1.0023 | 1.0186 | 1.0158 | 0.9033 | 0.9850 | 0.0275 |
| SYCP3      | 0.9868 | 1.0606 | 1.0449 | 0.8478 | 0.9850 | 0.0484 |
| OR6B3      | 0.9408 | 1.0731 | 1.0848 | 0.8414 | 0.9850 | 0.0580 |
| OR2T2      | 0.9283 | 1.1448 | 0.9855 | 0.8815 | 0.9850 | 0.0573 |
| LOC650716  | 0.8920 | 1.1694 | 0.9987 | 0.8799 | 0.9850 | 0.0670 |
| SLC6A15    | 0.9455 | 1.0155 | 1.0428 | 0.9363 | 0.9850 | 0.0261 |
| CCDC127    | 0.9516 | 1.2351 | 0.9636 | 0.7899 | 0.9850 | 0.0923 |
| GPR78      | 0.8634 | 1.1224 | 1.0753 | 0.8790 | 0.9850 | 0.0665 |
| TMEM196    | 0.9226 | 1.1445 | 0.9002 | 0.9728 | 0.9850 | 0.0553 |
| OR10A6     | 0.8899 | 1.1484 | 0.9761 | 0.9258 | 0.9850 | 0.0572 |
| LOC441376  | 0.9436 | 1.0998 | 1.0086 | 0.8882 | 0.9850 | 0.0455 |
| CD5L       | 0.8545 | 1.2809 | 0.9131 | 0.8916 | 0.9850 | 0.0994 |
| SEC14L5    | 0.9866 | 1.0979 | 0.9273 | 0.9284 | 0.9851 | 0.0401 |
| PLXNA2     | 0.9841 | 1.0401 | 1.0210 | 0.8949 | 0.9851 | 0.0322 |
| PCDH11X    | 0.9573 | 1.0836 | 0.9798 | 0.9195 | 0.9851 | 0.0351 |
| LOC1001336 | 1.0348 | 1.0523 | 0.9582 | 0.8949 | 0.9851 | 0.0363 |
| CROCC      | 0.9007 | 1.0856 | 1.0431 | 0.9108 | 0.9851 | 0.0466 |
| CYP2B6     | 0.9232 | 1.0809 | 0.9651 | 0.9711 | 0.9851 | 0.0337 |
| LOC641298  | 0.9668 | 1.0419 | 1.0140 | 0.9175 | 0.9851 | 0.0273 |
| LOC645931  | 0.9706 | 0.9851 | 1.0534 | 0.9311 | 0.9851 | 0.0255 |
| CLDN9      | 0.9640 | 1.0509 | 0.9663 | 0.9591 | 0.9851 | 0.0220 |
| LOC646195  | 1.0123 | 1.1017 | 0.9957 | 0.8306 | 0.9851 | 0.0565 |
| ATP2B1     | 0.9223 | 1.1001 | 1.0598 | 0.8581 | 0.9851 | 0.0569 |
| LOC440575  | 0.9073 | 1.1200 | 1.0814 | 0.8316 | 0.9851 | 0.0690 |
| FER1L5     | 1.0116 | 1.0456 | 1.0066 | 0.8766 | 0.9851 | 0.0372 |
| PCP4       | 0.9351 | 1.0113 | 1.1025 | 0.8915 | 0.9851 | 0.0463 |
| MIR125B1   | 0.9772 | 0.9999 | 1.0173 | 0.9460 | 0.9851 | 0.0154 |
| RBM1D      | 0.9873 | 1.0447 | 1.0757 | 0.8327 | 0.9851 | 0.0540 |
| MFI2       | 0.9513 | 1.0398 | 1.0391 | 0.9103 | 0.9851 | 0.0325 |
| LOC644229  | 0.9187 | 1.1036 | 1.0397 | 0.8784 | 0.9851 | 0.0523 |
| LOC648541  | 0.9279 | 1.0785 | 0.9579 | 0.9761 | 0.9851 | 0.0327 |
| HIST1H4F   | 1.0058 | 1.0620 | 0.9433 | 0.9294 | 0.9851 | 0.0305 |
| LOC1001296 | 0.9224 | 1.0816 | 1.0547 | 0.8818 | 0.9851 | 0.0490 |
| ERCC-00033 | 1.0353 | 1.0598 | 0.9514 | 0.8940 | 0.9851 | 0.0382 |
| LOC1001317 | 0.9444 | 1.0804 | 0.9886 | 0.9271 | 0.9851 | 0.0343 |
| ACOT8      | 0.9448 | 1.3112 | 0.8905 | 0.7939 | 0.9851 | 0.1131 |
| LOC728066  | 1.0251 | 1.0652 | 0.9289 | 0.9213 | 0.9851 | 0.0356 |
| CCL4       | 0.8711 | 1.0614 | 1.0854 | 0.9226 | 0.9851 | 0.0523 |
| LOC644466  | 1.0122 | 1.0587 | 1.0030 | 0.8665 | 0.9851 | 0.0414 |
| MCF2L      | 0.8520 | 1.1562 | 1.0331 | 0.8992 | 0.9851 | 0.0687 |
| LOC730993  | 1.0329 | 1.0917 | 0.9593 | 0.8566 | 0.9851 | 0.0507 |
| C3AR1      | 0.9125 | 1.0346 | 1.0643 | 0.9291 | 0.9851 | 0.0378 |

|            |        |        |        |        |        |        |
|------------|--------|--------|--------|--------|--------|--------|
| IL2RB      | 0.8484 | 1.0324 | 1.1135 | 0.9463 | 0.9851 | 0.0569 |
| SLC28A1    | 0.9955 | 1.0732 | 0.9904 | 0.8814 | 0.9851 | 0.0394 |
| ERCC-00013 | 1.0084 | 0.9896 | 1.0631 | 0.8795 | 0.9851 | 0.0385 |
| OR52R1     | 0.9295 | 1.0618 | 0.9831 | 0.9662 | 0.9851 | 0.0279 |
| LOC646373  | 0.8547 | 1.1122 | 1.0782 | 0.8954 | 0.9852 | 0.0645 |
| CYBA       | 0.8606 | 1.1217 | 0.9447 | 1.0137 | 0.9852 | 0.0552 |
| LYST       | 0.8779 | 1.0891 | 1.0900 | 0.8836 | 0.9852 | 0.0603 |
| LOC401875  | 0.9549 | 1.0983 | 0.9898 | 0.8976 | 0.9852 | 0.0422 |
| SFXN3      | 0.7204 | 1.3579 | 1.0544 | 0.8080 | 0.9852 | 0.1430 |
| SMOC1      | 0.9780 | 1.0181 | 1.0196 | 0.9249 | 0.9852 | 0.0223 |
| MIR191     | 0.9796 | 1.0893 | 1.0068 | 0.8650 | 0.9852 | 0.0463 |
| CSTL1      | 0.9524 | 1.0556 | 1.0185 | 0.9141 | 0.9852 | 0.0319 |
| LOC645634  | 0.9084 | 0.9706 | 1.0701 | 0.9915 | 0.9852 | 0.0334 |
| PLEKHA5    | 0.9225 | 1.0331 | 1.0230 | 0.9622 | 0.9852 | 0.0261 |
| ERAP1      | 1.0184 | 1.1914 | 0.9041 | 0.8268 | 0.9852 | 0.0792 |
| FBXO36     | 1.0490 | 1.0742 | 1.0004 | 0.8172 | 0.9852 | 0.0581 |
| LOC283340  | 0.9927 | 0.9205 | 1.0654 | 0.9622 | 0.9852 | 0.0306 |
| RNASE10    | 0.8634 | 1.1359 | 1.0718 | 0.8697 | 0.9852 | 0.0698 |
| STX18      | 0.8783 | 1.2225 | 0.9778 | 0.8623 | 0.9852 | 0.0831 |
| LOC1001317 | 0.9390 | 1.1365 | 0.9924 | 0.8729 | 0.9852 | 0.0560 |
| KRTAP10-9  | 0.9453 | 1.1469 | 0.9830 | 0.8657 | 0.9852 | 0.0592 |
| SH2B2      | 0.9114 | 1.0719 | 1.0656 | 0.8919 | 0.9852 | 0.0484 |
| SMA3       | 0.9563 | 0.9324 | 1.0350 | 1.0171 | 0.9852 | 0.0243 |
| IPP        | 0.9664 | 1.4196 | 0.8200 | 0.7349 | 0.9852 | 0.1525 |
| CGB1       | 0.9096 | 1.1286 | 1.0531 | 0.8496 | 0.9852 | 0.0641 |
| FLJ44385   | 0.9530 | 1.0615 | 1.0032 | 0.9232 | 0.9852 | 0.0303 |
| LOC727821  | 0.8962 | 1.0038 | 1.2289 | 0.8121 | 0.9852 | 0.0902 |
| LOC1001342 | 0.8594 | 1.1137 | 0.9537 | 1.0142 | 0.9852 | 0.0534 |
| KIR3DS1    | 0.9023 | 1.0387 | 1.0692 | 0.9306 | 0.9852 | 0.0406 |
| FAM71B     | 0.8543 | 1.0167 | 1.1239 | 0.9460 | 0.9852 | 0.0569 |
| LOC728073  | 0.9617 | 1.0899 | 1.0235 | 0.8659 | 0.9853 | 0.0476 |
| DUX3       | 0.8550 | 1.2254 | 1.0120 | 0.8486 | 0.9853 | 0.0885 |
| LOC643256  | 1.0529 | 0.9711 | 1.0256 | 0.8914 | 0.9853 | 0.0356 |
| C15orf48   | 0.9517 | 1.0493 | 1.0015 | 0.9384 | 0.9853 | 0.0253 |
| LOC728846  | 0.9844 | 1.0761 | 0.9820 | 0.8985 | 0.9853 | 0.0363 |
| LOC643275  | 0.9608 | 1.0113 | 1.0319 | 0.9371 | 0.9853 | 0.0219 |
| LOC641983  | 0.9728 | 1.1190 | 0.9779 | 0.8714 | 0.9853 | 0.0509 |
| LOC653866  | 0.9417 | 1.0104 | 1.0845 | 0.9044 | 0.9853 | 0.0397 |
| LOC1001291 | 0.9354 | 0.9953 | 1.1248 | 0.8856 | 0.9853 | 0.0516 |
| MIR766     | 0.9171 | 1.0859 | 1.0712 | 0.8669 | 0.9853 | 0.0549 |
| LOC647034  | 0.9106 | 1.0845 | 0.9518 | 0.9942 | 0.9853 | 0.0372 |
| MS4A10     | 0.9222 | 1.0171 | 1.0652 | 0.9366 | 0.9853 | 0.0339 |
| TMEM128    | 0.8689 | 1.0911 | 1.0887 | 0.8925 | 0.9853 | 0.0606 |
| MIR512-2   | 0.9005 | 1.1650 | 1.0387 | 0.8370 | 0.9853 | 0.0732 |
| FLJ44817   | 0.9748 | 0.9886 | 0.9649 | 1.0129 | 0.9853 | 0.0104 |
| OR6C3      | 0.9804 | 1.0915 | 0.9948 | 0.8745 | 0.9853 | 0.0444 |



|            |        |        |        |        |        |        |
|------------|--------|--------|--------|--------|--------|--------|
| LOC644507  | 1.0093 | 1.0186 | 0.9750 | 0.9383 | 0.9853 | 0.0183 |
| LOC646241  | 0.8406 | 1.0266 | 1.1057 | 0.9684 | 0.9853 | 0.0559 |
| FABP7      | 0.9775 | 1.1306 | 0.9566 | 0.8765 | 0.9853 | 0.0531 |
| LOC649199  | 0.9405 | 0.9932 | 1.0059 | 1.0017 | 0.9853 | 0.0152 |
| LOC643326  | 0.9401 | 1.0508 | 1.0368 | 0.9136 | 0.9853 | 0.0343 |
| LOC728412  | 0.9087 | 1.2215 | 0.9942 | 0.8170 | 0.9853 | 0.0866 |
| FLJ36032   | 0.9521 | 1.0507 | 1.0595 | 0.8790 | 0.9853 | 0.0430 |
| ZYG11A     | 0.9352 | 1.0625 | 0.9835 | 0.9602 | 0.9853 | 0.0275 |
| PALM2-AKAF | 0.9858 | 0.9966 | 1.0449 | 0.9140 | 0.9853 | 0.0270 |
| FAM53B     | 1.0323 | 1.1129 | 0.9799 | 0.8163 | 0.9853 | 0.0626 |
| SNAP91     | 1.0221 | 1.0402 | 0.9988 | 0.8803 | 0.9854 | 0.0360 |
| FMN1       | 0.9705 | 1.0614 | 0.9541 | 0.9554 | 0.9854 | 0.0256 |
| KIAA1755   | 0.9133 | 1.1386 | 0.9875 | 0.9021 | 0.9854 | 0.0545 |
| LOC653799  | 0.9556 | 1.1062 | 0.9982 | 0.8814 | 0.9854 | 0.0469 |
| PSMD10     | 0.7969 | 1.4597 | 0.9457 | 0.7392 | 0.9854 | 0.1640 |
| KCNJ5      | 0.9330 | 1.1038 | 0.9927 | 0.9120 | 0.9854 | 0.0430 |
| LOC1001301 | 0.8759 | 1.0621 | 1.1564 | 0.8470 | 0.9854 | 0.0743 |
| LOC1001283 | 0.8442 | 1.1144 | 1.0215 | 0.9613 | 0.9854 | 0.0566 |
| NCRNA00115 | 1.0147 | 1.0142 | 0.9549 | 0.9578 | 0.9854 | 0.0168 |
| FBXO9      | 0.8812 | 1.2046 | 1.0231 | 0.8327 | 0.9854 | 0.0835 |
| HCK        | 0.9700 | 1.1445 | 0.8734 | 0.9537 | 0.9854 | 0.0571 |
| POTEH      | 0.9422 | 1.0346 | 1.0314 | 0.9334 | 0.9854 | 0.0275 |
| LOC651907  | 0.8499 | 1.1564 | 0.9806 | 0.9547 | 0.9854 | 0.0636 |
| LOC652845  | 0.9133 | 1.0437 | 1.0921 | 0.8925 | 0.9854 | 0.0488 |
| LOC642623  | 0.9178 | 1.0397 | 1.0209 | 0.9633 | 0.9854 | 0.0278 |
| LOC283755  | 0.9679 | 1.0417 | 1.0444 | 0.8877 | 0.9854 | 0.0371 |
| LOC442015  | 0.9129 | 1.1578 | 0.9811 | 0.8900 | 0.9854 | 0.0606 |
| CST11      | 0.9291 | 1.1269 | 0.9758 | 0.9099 | 0.9854 | 0.0492 |
| LOC728002  | 0.9227 | 1.0811 | 1.0944 | 0.8435 | 0.9854 | 0.0613 |
| DBX1       | 1.0159 | 1.0530 | 0.9783 | 0.8945 | 0.9854 | 0.0339 |
| SAR1P3     | 0.9042 | 1.2572 | 0.9715 | 0.8088 | 0.9854 | 0.0965 |
| LOC342293  | 0.9726 | 1.0077 | 1.0120 | 0.9493 | 0.9854 | 0.0149 |
| LOC1001288 | 0.9711 | 1.0790 | 1.0243 | 0.8673 | 0.9854 | 0.0451 |
| LOC1001309 | 0.9639 | 1.1076 | 0.9510 | 0.9193 | 0.9855 | 0.0418 |
| C1orf137   | 0.9324 | 1.0260 | 1.0466 | 0.9368 | 0.9855 | 0.0297 |
| KIAA1957   | 1.0010 | 1.1128 | 0.9774 | 0.8506 | 0.9855 | 0.0538 |
| LOC1001324 | 0.9005 | 1.0386 | 1.0388 | 0.9640 | 0.9855 | 0.0334 |
| MYCNOS     | 0.8950 | 1.0958 | 0.9387 | 1.0123 | 0.9855 | 0.0440 |
| LOC729291  | 0.9604 | 1.0770 | 1.0195 | 0.8848 | 0.9855 | 0.0411 |
| LYZ        | 0.9582 | 1.0661 | 1.0040 | 0.9136 | 0.9855 | 0.0326 |
| LOC127011  | 0.9309 | 1.0941 | 1.0364 | 0.8805 | 0.9855 | 0.0486 |
| LOC653794  | 0.8935 | 1.1315 | 1.0388 | 0.8781 | 0.9855 | 0.0607 |
| KLHDC7B    | 0.9744 | 1.0735 | 0.9833 | 0.9107 | 0.9855 | 0.0335 |
| LOC285141  | 0.9303 | 1.1041 | 0.9493 | 0.9583 | 0.9855 | 0.0400 |
| CCDC129    | 0.9627 | 1.0838 | 0.9679 | 0.9275 | 0.9855 | 0.0340 |
| LOC642808  | 0.8357 | 1.1595 | 1.0235 | 0.9233 | 0.9855 | 0.0696 |

|            |        |        |        |        |        |        |
|------------|--------|--------|--------|--------|--------|--------|
| LOC650387  | 0.8938 | 1.1132 | 1.0953 | 0.8396 | 0.9855 | 0.0696 |
| LOC1001311 | 1.0276 | 0.9995 | 0.9977 | 0.9172 | 0.9855 | 0.0238 |
| LOC646900  | 0.8527 | 1.1479 | 1.2826 | 0.6588 | 0.9855 | 0.1411 |
| ABCC10     | 1.0227 | 1.2576 | 0.9167 | 0.7451 | 0.9855 | 0.1072 |
| FGF1       | 0.9222 | 1.0767 | 1.0181 | 0.9250 | 0.9855 | 0.0377 |
| KALRN      | 0.9274 | 1.0930 | 1.0041 | 0.9176 | 0.9855 | 0.0407 |
| LOC642889  | 0.9697 | 0.9848 | 1.1435 | 0.8441 | 0.9855 | 0.0614 |
| ACR        | 0.9843 | 1.1270 | 0.9934 | 0.8374 | 0.9855 | 0.0592 |
| IL12RB2    | 0.9808 | 1.0063 | 0.9955 | 0.9595 | 0.9855 | 0.0101 |
| LOC388160  | 1.0341 | 1.0418 | 1.0198 | 0.8465 | 0.9855 | 0.0466 |
| USP53      | 0.8979 | 1.0774 | 1.0970 | 0.8698 | 0.9855 | 0.0591 |
| PLGLA1     | 0.9050 | 1.1171 | 0.9964 | 0.9236 | 0.9855 | 0.0481 |
| CCDC40     | 0.9252 | 1.0276 | 1.0191 | 0.9702 | 0.9855 | 0.0238 |
| MYH7B      | 0.9035 | 1.0938 | 1.0002 | 0.9446 | 0.9855 | 0.0412 |
| LOC376693  | 0.9439 | 1.0122 | 1.1052 | 0.8808 | 0.9855 | 0.0481 |
| PRDM16     | 0.9427 | 1.0704 | 1.0150 | 0.9141 | 0.9855 | 0.0354 |
| LOC645535  | 0.9387 | 1.1537 | 0.9004 | 0.9494 | 0.9855 | 0.0570 |
| MTNR1B     | 0.9027 | 1.1551 | 0.9366 | 0.9479 | 0.9856 | 0.0573 |
| C11orf30   | 0.9811 | 1.0943 | 1.0102 | 0.8567 | 0.9856 | 0.0492 |
| LOC729770  | 0.9501 | 1.0465 | 0.9848 | 0.9609 | 0.9856 | 0.0216 |
| LOC1001305 | 0.9456 | 1.0354 | 1.0616 | 0.8996 | 0.9856 | 0.0379 |
| C5         | 0.9613 | 1.0922 | 1.0635 | 0.8252 | 0.9856 | 0.0604 |
| LOC644343  | 0.9378 | 1.1488 | 0.9569 | 0.8988 | 0.9856 | 0.0557 |
| LOC729739  | 0.9729 | 1.0675 | 1.0164 | 0.8854 | 0.9856 | 0.0386 |
| TMEM200A   | 0.9184 | 1.0641 | 1.0550 | 0.9048 | 0.9856 | 0.0428 |
| LOC652346  | 1.0148 | 1.0645 | 1.0063 | 0.8567 | 0.9856 | 0.0448 |
| NXNL2      | 0.8825 | 1.1299 | 1.0041 | 0.9258 | 0.9856 | 0.0543 |
| LOC644055  | 0.8903 | 1.0574 | 1.0215 | 0.9732 | 0.9856 | 0.0361 |
| SAMD9L     | 0.8805 | 1.0113 | 1.1257 | 0.9249 | 0.9856 | 0.0540 |
| MIR410     | 0.9369 | 1.0144 | 0.9861 | 1.0049 | 0.9856 | 0.0173 |
| EIF3H      | 0.6947 | 1.5711 | 1.0310 | 0.6455 | 0.9856 | 0.2131 |
| TSP50      | 0.9688 | 1.1025 | 0.9194 | 0.9517 | 0.9856 | 0.0403 |
| LOC647049  | 0.9946 | 1.0590 | 1.0180 | 0.8708 | 0.9856 | 0.0405 |
| LOC647219  | 0.8586 | 1.1121 | 1.0622 | 0.9095 | 0.9856 | 0.0604 |
| PTK6       | 0.9119 | 1.0812 | 1.0065 | 0.9428 | 0.9856 | 0.0375 |
| LOC1001347 | 0.9897 | 1.0191 | 0.9869 | 0.9466 | 0.9856 | 0.0149 |
| AVP        | 0.9873 | 1.1105 | 0.9088 | 0.9358 | 0.9856 | 0.0447 |
| LOC652606  | 0.9277 | 1.0876 | 0.9425 | 0.9846 | 0.9856 | 0.0361 |
| AKR1CL1    | 0.8604 | 1.1543 | 1.0036 | 0.9241 | 0.9856 | 0.0634 |
| LOC730476  | 1.0018 | 1.0776 | 0.9781 | 0.8850 | 0.9856 | 0.0397 |
| DCX        | 0.8889 | 1.0170 | 1.0233 | 1.0133 | 0.9856 | 0.0323 |
| KIAA1704   | 0.8861 | 1.0710 | 1.0199 | 0.9655 | 0.9856 | 0.0396 |
| TFEC       | 0.9178 | 1.0526 | 1.0062 | 0.9660 | 0.9856 | 0.0287 |
| LOC653877  | 0.9419 | 1.0137 | 0.9339 | 1.0531 | 0.9856 | 0.0288 |
| RSHL1      | 0.8653 | 1.0067 | 1.1171 | 0.9534 | 0.9856 | 0.0527 |
| RASGRF2    | 0.9639 | 1.1079 | 0.9503 | 0.9204 | 0.9856 | 0.0418 |

|            |        |        |        |        |        |        |
|------------|--------|--------|--------|--------|--------|--------|
| WDR49      | 0.9466 | 1.1172 | 0.9655 | 0.9133 | 0.9856 | 0.0452 |
| LOC642173  | 0.9134 | 1.0448 | 1.0854 | 0.8990 | 0.9856 | 0.0467 |
| PRKCG      | 0.9984 | 1.1481 | 0.8779 | 0.9183 | 0.9857 | 0.0596 |
| SSTR1      | 0.8702 | 1.0470 | 1.0629 | 0.9624 | 0.9857 | 0.0444 |
| LOC441505  | 0.8615 | 1.1126 | 1.0400 | 0.9284 | 0.9857 | 0.0561 |
| CXorf52    | 0.9609 | 1.0317 | 0.9917 | 0.9584 | 0.9857 | 0.0171 |
| LOC643322  | 0.9642 | 1.0928 | 0.9982 | 0.8875 | 0.9857 | 0.0425 |
| KCNG4      | 0.8891 | 1.1158 | 0.9967 | 0.9412 | 0.9857 | 0.0486 |
| OR52L1     | 0.8271 | 1.0962 | 0.9991 | 1.0203 | 0.9857 | 0.0568 |
| ENTPD5     | 0.8828 | 1.3513 | 0.8901 | 0.8186 | 0.9857 | 0.1229 |
| LOC643334  | 0.9036 | 1.1229 | 0.9842 | 0.9321 | 0.9857 | 0.0487 |
| LOC389523  | 0.8838 | 1.0494 | 1.0052 | 1.0044 | 0.9857 | 0.0356 |
| LOC654147  | 1.0109 | 1.0359 | 0.9744 | 0.9216 | 0.9857 | 0.0248 |
| LOC650686  | 0.9917 | 1.1055 | 0.9278 | 0.9178 | 0.9857 | 0.0432 |
| GDF3       | 0.9490 | 1.1168 | 0.9332 | 0.9438 | 0.9857 | 0.0438 |
| LOC1001343 | 0.8970 | 1.1378 | 1.0023 | 0.9057 | 0.9857 | 0.0560 |
| INADL      | 0.9575 | 1.2013 | 1.0020 | 0.7819 | 0.9857 | 0.0862 |
| SNORD70    | 0.8766 | 1.0590 | 1.0405 | 0.9669 | 0.9857 | 0.0415 |
| LOC1001300 | 0.9494 | 1.1193 | 0.9985 | 0.8757 | 0.9857 | 0.0512 |
| C8orf45    | 0.8986 | 1.1212 | 1.1074 | 0.8156 | 0.9857 | 0.0762 |
| MIR510     | 0.8361 | 1.0850 | 1.0157 | 1.0061 | 0.9857 | 0.0529 |
| AMIGO1     | 0.9282 | 1.0833 | 1.0202 | 0.9112 | 0.9857 | 0.0404 |
| TH         | 0.9264 | 1.0583 | 1.0235 | 0.9348 | 0.9857 | 0.0327 |
| TNNT1      | 0.9352 | 1.1188 | 1.0544 | 0.8346 | 0.9857 | 0.0631 |
| LOC1001295 | 1.0111 | 1.0123 | 1.0421 | 0.8776 | 0.9858 | 0.0368 |
| TMPRSS11F  | 0.9300 | 1.0491 | 1.0592 | 0.9047 | 0.9858 | 0.0399 |
| GBX2       | 0.9088 | 1.1221 | 1.0191 | 0.8931 | 0.9858 | 0.0534 |
| NSD1       | 0.9184 | 1.1960 | 0.9398 | 0.8889 | 0.9858 | 0.0709 |
| CUX1       | 0.9156 | 1.1726 | 0.9804 | 0.8745 | 0.9858 | 0.0660 |
| LOC152663  | 1.0428 | 1.0233 | 1.0284 | 0.8486 | 0.9858 | 0.0459 |
| LOC728341  | 0.9465 | 1.0172 | 1.0239 | 0.9555 | 0.9858 | 0.0202 |
| IL33       | 0.9752 | 1.0521 | 0.9676 | 0.9482 | 0.9858 | 0.0228 |
| CNGA4      | 0.9473 | 1.0498 | 1.0886 | 0.8574 | 0.9858 | 0.0521 |
| LOC652859  | 0.9133 | 0.9984 | 1.0191 | 1.0123 | 0.9858 | 0.0245 |
| MED21      | 0.9967 | 1.0016 | 1.0213 | 0.9236 | 0.9858 | 0.0214 |
| LOC730411  | 0.9620 | 1.0168 | 1.0305 | 0.9338 | 0.9858 | 0.0228 |
| LOC651059  | 0.8125 | 1.1269 | 1.0826 | 0.9212 | 0.9858 | 0.0727 |
| LOC730924  | 0.8757 | 1.0737 | 1.0740 | 0.9198 | 0.9858 | 0.0516 |
| CXCR1      | 0.9121 | 1.2042 | 0.9962 | 0.8308 | 0.9858 | 0.0803 |
| LOC642072  | 0.9047 | 0.9818 | 1.0897 | 0.9671 | 0.9858 | 0.0384 |
| GJA1       | 0.8636 | 1.0549 | 1.1409 | 0.8839 | 0.9858 | 0.0672 |
| SPRR2B     | 0.9805 | 0.9963 | 1.0683 | 0.8982 | 0.9858 | 0.0349 |
| MIR920     | 1.0351 | 0.9869 | 1.0234 | 0.8979 | 0.9858 | 0.0311 |
| DUSP7      | 0.8238 | 1.0861 | 1.0906 | 0.9428 | 0.9858 | 0.0640 |
| TMEM31     | 0.8842 | 1.1154 | 1.0558 | 0.8879 | 0.9858 | 0.0589 |
| NROB1      | 0.9129 | 1.0325 | 1.0302 | 0.9678 | 0.9858 | 0.0286 |

|            |        |        |        |        |        |        |
|------------|--------|--------|--------|--------|--------|--------|
| C12orf42   | 0.9320 | 1.0896 | 0.9998 | 0.9220 | 0.9858 | 0.0387 |
| SAMD14     | 0.9686 | 1.0891 | 0.9726 | 0.9131 | 0.9858 | 0.0370 |
| TPST1      | 0.8358 | 1.4149 | 0.9434 | 0.7492 | 0.9858 | 0.1484 |
| LOC647865  | 0.9318 | 1.1610 | 1.0089 | 0.8416 | 0.9858 | 0.0677 |
| LOC1001296 | 0.9114 | 1.1475 | 0.9376 | 0.9470 | 0.9858 | 0.0544 |
| LOC1001295 | 1.0242 | 1.0312 | 1.0043 | 0.8836 | 0.9858 | 0.0345 |
| PHKA2      | 0.9552 | 1.2887 | 0.9541 | 0.7455 | 0.9859 | 0.1123 |
| LOC1001320 | 0.9559 | 1.0730 | 1.0301 | 0.8845 | 0.9859 | 0.0416 |
| ETS2       | 0.8917 | 1.1985 | 1.0264 | 0.8269 | 0.9859 | 0.0822 |
| PCDHGA5    | 0.9521 | 1.0321 | 1.0344 | 0.9248 | 0.9859 | 0.0279 |
| LOC338586  | 1.0404 | 1.0115 | 1.0877 | 0.8039 | 0.9859 | 0.0627 |
| LOC644066  | 0.8783 | 0.9586 | 1.1300 | 0.9765 | 0.9859 | 0.0526 |
| LOC650803  | 0.9641 | 1.4113 | 0.8046 | 0.7635 | 0.9859 | 0.1483 |
| LOC646348  | 0.9091 | 1.3249 | 0.8310 | 0.8787 | 0.9859 | 0.1141 |
| DENND2D    | 0.9192 | 1.0753 | 1.0115 | 0.9376 | 0.9859 | 0.0359 |
| DYTN       | 0.9575 | 1.1013 | 0.9730 | 0.9118 | 0.9859 | 0.0406 |
| PLA2G2E    | 0.9460 | 1.1215 | 0.9947 | 0.8814 | 0.9859 | 0.0508 |
| LOC641765  | 0.9061 | 1.1250 | 0.9638 | 0.9487 | 0.9859 | 0.0480 |
| LOC1001325 | 0.9128 | 1.1338 | 1.0319 | 0.8652 | 0.9859 | 0.0605 |
| LOC1001340 | 0.9974 | 1.0556 | 0.9768 | 0.9138 | 0.9859 | 0.0292 |
| CLEC4D     | 0.9476 | 0.9994 | 1.0491 | 0.9475 | 0.9859 | 0.0244 |
| LOC647274  | 1.0183 | 1.0584 | 0.9766 | 0.8903 | 0.9859 | 0.0360 |
| LOC1001283 | 0.9384 | 1.1192 | 0.9794 | 0.9067 | 0.9859 | 0.0469 |
| CD164      | 0.9647 | 1.1371 | 1.0551 | 0.7868 | 0.9859 | 0.0751 |
| MOCS2      | 0.6898 | 1.3115 | 1.0931 | 0.8493 | 0.9859 | 0.1366 |
| LOC442590  | 0.9243 | 1.0738 | 1.0408 | 0.9048 | 0.9859 | 0.0420 |
| LOC728543  | 0.9596 | 1.0649 | 1.0350 | 0.8842 | 0.9859 | 0.0405 |
| LOC1001314 | 0.8807 | 1.2032 | 0.9480 | 0.9120 | 0.9859 | 0.0737 |
| USP25      | 1.0155 | 1.0178 | 0.9978 | 0.9127 | 0.9860 | 0.0248 |
| MIR384     | 0.9451 | 1.1388 | 0.9438 | 0.9161 | 0.9860 | 0.0514 |
| LOC728853  | 0.8494 | 1.1151 | 1.0882 | 0.8911 | 0.9860 | 0.0676 |
| LOC645602  | 0.9304 | 1.0325 | 1.1050 | 0.8759 | 0.9860 | 0.0513 |
| LOC730032  | 0.9150 | 1.1006 | 0.9539 | 0.9744 | 0.9860 | 0.0401 |
| DSG1       | 0.8908 | 1.1488 | 1.0419 | 0.8623 | 0.9860 | 0.0671 |
| ZNF716     | 0.9073 | 1.0794 | 1.0380 | 0.9191 | 0.9860 | 0.0429 |
| TRIP6      | 0.9254 | 1.1666 | 1.0567 | 0.7951 | 0.9860 | 0.0805 |
| FIGLA      | 0.9749 | 1.1144 | 0.9437 | 0.9109 | 0.9860 | 0.0448 |
| RANBP3L    | 1.0358 | 1.1790 | 0.9442 | 0.7849 | 0.9860 | 0.0826 |
| CSDC2      | 0.9466 | 1.1250 | 0.9665 | 0.9058 | 0.9860 | 0.0480 |
| LOC1001293 | 0.9097 | 1.1120 | 1.0694 | 0.8529 | 0.9860 | 0.0622 |
| MAGI3      | 0.9207 | 1.0634 | 1.0581 | 0.9017 | 0.9860 | 0.0433 |
| DEFB109P1  | 0.8996 | 1.1036 | 1.0416 | 0.8991 | 0.9860 | 0.0516 |
| KRTAP20-2  | 0.9138 | 1.0383 | 1.0377 | 0.9542 | 0.9860 | 0.0311 |
| LOC1001334 | 0.9313 | 1.0190 | 1.0481 | 0.9456 | 0.9860 | 0.0282 |
| WNT1       | 0.8518 | 1.0925 | 1.0822 | 0.9175 | 0.9860 | 0.0601 |
| HRH2       | 1.0251 | 0.9847 | 1.0048 | 0.9294 | 0.9860 | 0.0206 |

|             |        |        |        |        |        |        |
|-------------|--------|--------|--------|--------|--------|--------|
| LOC646191   | 0.9037 | 1.0634 | 0.9853 | 0.9918 | 0.9860 | 0.0327 |
| CLSTN2      | 0.9818 | 1.0987 | 1.0238 | 0.8398 | 0.9860 | 0.0544 |
| LOC340221   | 0.9910 | 1.0529 | 1.0360 | 0.8643 | 0.9860 | 0.0426 |
| LOC1001300  | 1.0074 | 1.0103 | 0.9634 | 0.9631 | 0.9860 | 0.0132 |
| WFDC8       | 0.9637 | 1.0738 | 1.0249 | 0.8817 | 0.9860 | 0.0414 |
| LOC652322   | 0.7446 | 1.2529 | 1.1660 | 0.7806 | 0.9860 | 0.1304 |
| DPEP1       | 0.9289 | 1.1637 | 0.9870 | 0.8646 | 0.9860 | 0.0643 |
| CICK0721Q.1 | 0.9232 | 1.0857 | 1.0278 | 0.9075 | 0.9860 | 0.0426 |
| ERCC1       | 0.8078 | 1.3037 | 1.0639 | 0.7687 | 0.9861 | 0.1245 |
| PSMB8       | 0.9275 | 1.0634 | 1.0583 | 0.8951 | 0.9861 | 0.0437 |
| BBS9        | 0.9392 | 1.1939 | 1.0208 | 0.7902 | 0.9861 | 0.0841 |
| LOC92973    | 0.9979 | 1.1571 | 0.9539 | 0.8354 | 0.9861 | 0.0665 |
| KRTAP19-1   | 1.0257 | 1.0394 | 1.0304 | 0.8487 | 0.9861 | 0.0459 |
| ACAD9       | 0.9383 | 1.3942 | 0.9260 | 0.6857 | 0.9861 | 0.1480 |
| KRT38       | 0.9627 | 1.0391 | 0.9957 | 0.9468 | 0.9861 | 0.0204 |
| LOC729076   | 0.8372 | 1.2616 | 0.9986 | 0.8470 | 0.9861 | 0.0990 |
| LOC1001317  | 1.0174 | 1.0070 | 1.0197 | 0.9001 | 0.9861 | 0.0288 |
| CIB4        | 1.1047 | 0.9474 | 1.0282 | 0.8640 | 0.9861 | 0.0518 |
| LOC646584   | 0.9169 | 1.0731 | 0.9424 | 1.0119 | 0.9861 | 0.0353 |
| TTC37       | 0.8637 | 1.2838 | 1.0046 | 0.7922 | 0.9861 | 0.1086 |
| LOC643194   | 0.9261 | 1.0966 | 1.0596 | 0.8620 | 0.9861 | 0.0552 |
| LOC1001341  | 0.8364 | 1.1369 | 1.0660 | 0.9052 | 0.9861 | 0.0696 |
| LOC652155   | 0.9235 | 1.1066 | 0.9999 | 0.9144 | 0.9861 | 0.0445 |
| ZNF836      | 0.9008 | 1.0907 | 1.0327 | 0.9202 | 0.9861 | 0.0454 |
| LOC440243   | 0.9296 | 1.0476 | 1.0541 | 0.9131 | 0.9861 | 0.0375 |
| EFCAB5      | 0.9216 | 1.0362 | 1.0204 | 0.9664 | 0.9861 | 0.0262 |
| LOC652993   | 1.0226 | 1.0765 | 0.9796 | 0.8658 | 0.9861 | 0.0447 |
| CXorf59     | 0.9700 | 1.1658 | 0.9471 | 0.8617 | 0.9861 | 0.0643 |
| LOC402538   | 1.0609 | 1.0014 | 0.9279 | 0.9542 | 0.9861 | 0.0292 |
| RBMV1A1     | 0.9414 | 1.0193 | 1.0500 | 0.9338 | 0.9861 | 0.0287 |
| OR5AR1      | 1.0101 | 1.0526 | 0.9809 | 0.9011 | 0.9862 | 0.0320 |
| SNX21       | 0.9832 | 1.0226 | 1.0250 | 0.9139 | 0.9862 | 0.0259 |
| LOC644328   | 0.9591 | 1.1000 | 0.9827 | 0.9029 | 0.9862 | 0.0415 |
| GTF2IRD1    | 0.9689 | 1.2622 | 0.9443 | 0.7693 | 0.9862 | 0.1022 |
| RKHD1       | 0.8744 | 1.0085 | 1.0479 | 1.0139 | 0.9862 | 0.0383 |
| AXL         | 0.9601 | 1.1194 | 1.0085 | 0.8567 | 0.9862 | 0.0545 |
| ABCC13      | 0.9561 | 1.0513 | 1.0141 | 0.9232 | 0.9862 | 0.0287 |
| ITIH3       | 0.9563 | 1.0950 | 0.9586 | 0.9348 | 0.9862 | 0.0367 |
| LOC1001292  | 0.9500 | 1.1181 | 1.0158 | 0.8609 | 0.9862 | 0.0542 |
| LOC1001319  | 0.9203 | 1.1017 | 1.0939 | 0.8289 | 0.9862 | 0.0671 |
| HOXB9       | 1.0184 | 1.0314 | 1.0049 | 0.8901 | 0.9862 | 0.0325 |
| LOC650311   | 0.9639 | 0.9994 | 1.0416 | 0.9399 | 0.9862 | 0.0221 |
| LOC1001314  | 0.7384 | 1.3068 | 1.1303 | 0.7694 | 0.9862 | 0.1390 |
| VAT1L       | 0.9311 | 1.1314 | 0.9846 | 0.8977 | 0.9862 | 0.0516 |
| LOC1000342  | 0.9394 | 1.0571 | 1.0080 | 0.9403 | 0.9862 | 0.0286 |
| LOC644785   | 1.0139 | 1.0881 | 0.9443 | 0.8985 | 0.9862 | 0.0414 |

|            |        |        |        |        |        |        |
|------------|--------|--------|--------|--------|--------|--------|
| LOC1001318 | 0.9174 | 1.1216 | 1.0029 | 0.9029 | 0.9862 | 0.0502 |
| TCP11      | 0.8744 | 1.0305 | 1.0570 | 0.9829 | 0.9862 | 0.0403 |
| LOC653204  | 0.9661 | 1.0781 | 1.0261 | 0.8745 | 0.9862 | 0.0437 |
| ROPN1B     | 0.8946 | 1.0891 | 1.0568 | 0.9043 | 0.9862 | 0.0506 |
| OR2T3      | 0.9280 | 1.1944 | 0.9387 | 0.8837 | 0.9862 | 0.0704 |
| LOC643670  | 0.9121 | 1.0237 | 1.0641 | 0.9450 | 0.9862 | 0.0349 |
| VSIG1      | 0.9540 | 1.0878 | 1.0264 | 0.8767 | 0.9862 | 0.0456 |
| LOC392979  | 0.9184 | 1.0681 | 0.9825 | 0.9759 | 0.9862 | 0.0309 |
| MGC16703   | 0.8948 | 1.3596 | 0.8825 | 0.8081 | 0.9862 | 0.1259 |
| TFAP2A     | 0.9016 | 1.0958 | 1.1099 | 0.8377 | 0.9862 | 0.0686 |
| ACTL8      | 0.9737 | 1.0020 | 1.0505 | 0.9188 | 0.9862 | 0.0275 |
| GANC       | 0.9410 | 1.1186 | 0.9575 | 0.9279 | 0.9862 | 0.0445 |
| MMD2       | 0.8760 | 1.1012 | 0.9382 | 1.0296 | 0.9862 | 0.0496 |
| TMEM206    | 0.9941 | 1.1392 | 1.0327 | 0.7789 | 0.9863 | 0.0756 |
| TACC2      | 0.9174 | 1.3570 | 0.9328 | 0.7378 | 0.9863 | 0.1313 |
| ZNF650     | 0.8008 | 1.2813 | 0.9763 | 0.8867 | 0.9863 | 0.1047 |
| CHST4      | 1.0344 | 1.0751 | 0.9392 | 0.8963 | 0.9863 | 0.0413 |
| LOC649723  | 0.9292 | 1.1309 | 0.9639 | 0.9210 | 0.9863 | 0.0491 |
| LOC647055  | 0.9001 | 1.0191 | 1.1357 | 0.8901 | 0.9863 | 0.0578 |
| LOC129870  | 0.9959 | 1.0518 | 1.0678 | 0.8296 | 0.9863 | 0.0545 |
| CHMP4B     | 0.8981 | 1.3039 | 1.0453 | 0.6977 | 0.9863 | 0.1276 |
| SORCS3     | 1.0015 | 1.0380 | 1.0276 | 0.8779 | 0.9863 | 0.0369 |
| NEK9       | 0.8588 | 1.1737 | 0.9557 | 0.9568 | 0.9863 | 0.0666 |
| FAM98B     | 0.9330 | 1.1917 | 0.9327 | 0.8877 | 0.9863 | 0.0693 |
| LOC1001342 | 0.9815 | 1.0772 | 0.9303 | 0.9562 | 0.9863 | 0.0320 |
| CAPN6      | 0.9901 | 1.1452 | 0.9595 | 0.8503 | 0.9863 | 0.0609 |
| SNORD3C    | 0.9188 | 1.2932 | 0.8477 | 0.8855 | 0.9863 | 0.1033 |
| LOC1001282 | 0.9267 | 1.0136 | 1.0129 | 0.9919 | 0.9863 | 0.0205 |
| DTNB       | 1.1046 | 1.0888 | 0.9942 | 0.7575 | 0.9863 | 0.0801 |
| TYRP1      | 0.8861 | 1.1733 | 1.0677 | 0.8180 | 0.9863 | 0.0816 |
| FILIP1L    | 0.9408 | 1.0290 | 0.9883 | 0.9871 | 0.9863 | 0.0180 |
| LOC644789  | 0.9458 | 1.0515 | 0.9592 | 0.9887 | 0.9863 | 0.0235 |
| LOC643138  | 1.0188 | 1.1443 | 0.8510 | 0.9311 | 0.9863 | 0.0628 |
| ZRANB1     | 0.8552 | 1.2603 | 1.0841 | 0.7456 | 0.9863 | 0.1154 |
| LOC401847  | 0.9452 | 1.0763 | 1.0742 | 0.8496 | 0.9863 | 0.0549 |
| LOC641995  | 0.9296 | 1.0150 | 1.0609 | 0.9398 | 0.9863 | 0.0313 |
| KIAA2026   | 0.9246 | 1.2061 | 0.9650 | 0.8495 | 0.9863 | 0.0771 |
| LOC400299  | 0.9483 | 1.1184 | 1.0192 | 0.8593 | 0.9863 | 0.0549 |
| LHX3       | 0.9698 | 1.0647 | 1.0091 | 0.9017 | 0.9863 | 0.0343 |
| ZCCHC13    | 0.9863 | 1.0393 | 1.0273 | 0.8923 | 0.9863 | 0.0333 |
| LOC644264  | 0.8786 | 1.1926 | 1.0020 | 0.8720 | 0.9863 | 0.0750 |
| LOC1001342 | 0.8832 | 1.1600 | 0.9596 | 0.9425 | 0.9863 | 0.0602 |
| LOC1001318 | 1.0011 | 1.0167 | 1.0461 | 0.8815 | 0.9863 | 0.0362 |
| VSX1       | 0.9921 | 1.0719 | 0.9692 | 0.9121 | 0.9863 | 0.0331 |
| HOXA9      | 0.8817 | 1.1070 | 0.9425 | 1.0141 | 0.9863 | 0.0485 |
| RIPPLY1    | 0.9980 | 1.0190 | 1.0744 | 0.8539 | 0.9863 | 0.0470 |

|            |        |        |        |        |        |        |
|------------|--------|--------|--------|--------|--------|--------|
| LOC646335  | 0.9575 | 1.0418 | 0.9948 | 0.9512 | 0.9863 | 0.0208 |
| LOC648840  | 0.9661 | 0.9986 | 1.0253 | 0.9553 | 0.9863 | 0.0159 |
| C16orf81   | 0.8804 | 1.0634 | 0.9757 | 1.0259 | 0.9863 | 0.0396 |
| LOC649374  | 0.9457 | 0.9307 | 1.0651 | 1.0038 | 0.9863 | 0.0306 |
| BRD7P2     | 0.8820 | 1.4418 | 0.8796 | 0.7419 | 0.9863 | 0.1553 |
| GDPD4      | 0.9419 | 1.0953 | 1.0661 | 0.8421 | 0.9863 | 0.0585 |
| LOC653184  | 0.9732 | 1.0167 | 1.0348 | 0.9207 | 0.9864 | 0.0254 |
| LOC650274  | 0.9278 | 1.1197 | 0.9579 | 0.9400 | 0.9864 | 0.0449 |
| REXO1L2P   | 0.9659 | 1.0971 | 1.0115 | 0.8710 | 0.9864 | 0.0471 |
| LOC728086  | 0.8806 | 1.1037 | 1.0419 | 0.9193 | 0.9864 | 0.0521 |
| DHX58      | 0.9045 | 1.0786 | 1.0875 | 0.8749 | 0.9864 | 0.0562 |
| RGL2       | 1.0026 | 1.1163 | 0.9706 | 0.8560 | 0.9864 | 0.0535 |
| LRRC4B     | 1.0215 | 1.0044 | 0.9249 | 0.9947 | 0.9864 | 0.0212 |
| ARL6IP4    | 0.8682 | 1.3229 | 0.9630 | 0.7915 | 0.9864 | 0.1175 |
| LOC642509  | 0.9703 | 1.1360 | 0.9465 | 0.8927 | 0.9864 | 0.0525 |
| LOC647080  | 0.9578 | 1.0925 | 1.1159 | 0.7793 | 0.9864 | 0.0773 |
| LOC648680  | 1.0829 | 1.0964 | 0.9496 | 0.8168 | 0.9864 | 0.0655 |
| VGLL1      | 0.9409 | 1.0522 | 1.0918 | 0.8607 | 0.9864 | 0.0527 |
| RGSL2      | 0.8207 | 1.1984 | 1.0934 | 0.8331 | 0.9864 | 0.0946 |
| PCF11      | 1.0386 | 1.2098 | 0.9056 | 0.7916 | 0.9864 | 0.0900 |
| LOC139735  | 1.0551 | 1.0367 | 0.9288 | 0.9250 | 0.9864 | 0.0346 |
| KCNA5      | 0.9420 | 1.0894 | 1.0412 | 0.8729 | 0.9864 | 0.0487 |
| LOC1001323 | 0.9086 | 1.1406 | 1.0244 | 0.8720 | 0.9864 | 0.0608 |
| ABHD9      | 0.9315 | 0.9587 | 1.0424 | 1.0130 | 0.9864 | 0.0252 |
| FGF13      | 0.9714 | 1.0638 | 1.0107 | 0.8998 | 0.9864 | 0.0345 |
| LOC732446  | 0.9455 | 1.0890 | 1.0418 | 0.8694 | 0.9864 | 0.0491 |
| WDSOF1     | 0.9409 | 1.0881 | 0.9843 | 0.9324 | 0.9864 | 0.0357 |
| TTY21      | 1.0114 | 1.0908 | 1.0044 | 0.8392 | 0.9864 | 0.0528 |
| MIR548G    | 1.0375 | 1.0777 | 0.9619 | 0.8687 | 0.9864 | 0.0460 |
| LOC730163  | 0.9037 | 1.0348 | 1.0874 | 0.9200 | 0.9865 | 0.0445 |
| DOC2B      | 1.0021 | 1.0629 | 0.9688 | 0.9119 | 0.9865 | 0.0316 |
| CCDC122    | 0.9833 | 1.0912 | 0.9766 | 0.8948 | 0.9865 | 0.0403 |
| HIST1H4D   | 0.9045 | 1.0499 | 1.0177 | 0.9738 | 0.9865 | 0.0314 |
| LOC728687  | 0.8876 | 1.0907 | 1.0749 | 0.8926 | 0.9865 | 0.0557 |
| LOC653544  | 0.9270 | 1.0797 | 1.0892 | 0.8500 | 0.9865 | 0.0588 |
| LOC161527  | 0.9278 | 1.1197 | 1.0005 | 0.8980 | 0.9865 | 0.0493 |
| ERCC-00134 | 0.9466 | 1.1053 | 0.9720 | 0.9220 | 0.9865 | 0.0409 |
| GPR1       | 0.9664 | 1.1205 | 1.0459 | 0.8132 | 0.9865 | 0.0658 |
| PVRL1      | 0.9513 | 1.0939 | 1.0302 | 0.8706 | 0.9865 | 0.0484 |
| DOPEY1     | 0.9228 | 1.2238 | 1.0057 | 0.7936 | 0.9865 | 0.0904 |
| TDRD12     | 0.9656 | 1.0239 | 1.0416 | 0.9150 | 0.9865 | 0.0288 |
| CP         | 1.0017 | 1.0833 | 1.0359 | 0.8251 | 0.9865 | 0.0563 |
| LOC647873  | 0.9344 | 1.1622 | 0.8906 | 0.9588 | 0.9865 | 0.0602 |
| ULBP3      | 0.8746 | 1.1108 | 0.9366 | 1.0241 | 0.9865 | 0.0515 |
| LOC149478  | 0.9615 | 1.0559 | 1.0297 | 0.8989 | 0.9865 | 0.0353 |
| LOC652276  | 0.8673 | 1.1361 | 0.9946 | 0.9481 | 0.9865 | 0.0564 |

|            |        |        |        |        |        |        |
|------------|--------|--------|--------|--------|--------|--------|
| MIR938     | 0.8169 | 1.0573 | 1.1106 | 0.9612 | 0.9865 | 0.0644 |
| CXorf42    | 0.9579 | 1.0934 | 0.9449 | 0.9498 | 0.9865 | 0.0357 |
| NKX2-6     | 0.9108 | 1.1697 | 0.8987 | 0.9669 | 0.9865 | 0.0628 |
| CYorf14    | 0.8818 | 1.0706 | 1.0073 | 0.9864 | 0.9865 | 0.0392 |
| LOC652679  | 1.0033 | 1.1009 | 0.9609 | 0.8810 | 0.9865 | 0.0458 |
| CCDC155    | 0.9234 | 1.0959 | 1.0602 | 0.8667 | 0.9865 | 0.0546 |
| IAPP       | 1.0186 | 0.9728 | 0.9940 | 0.9609 | 0.9865 | 0.0127 |
| TCF25      | 0.8673 | 1.4269 | 0.9924 | 0.6596 | 0.9866 | 0.1620 |
| CACNA2D3   | 0.9771 | 1.0582 | 1.0354 | 0.8756 | 0.9866 | 0.0408 |
| BHLHB2     | 0.8523 | 1.3782 | 0.8698 | 0.8459 | 0.9866 | 0.1306 |
| C6orf205   | 0.9089 | 1.0695 | 1.0506 | 0.9172 | 0.9866 | 0.0427 |
| NCCRP1     | 0.9409 | 1.0335 | 1.0433 | 0.9286 | 0.9866 | 0.0301 |
| MIR645     | 0.9618 | 1.1773 | 0.9559 | 0.8512 | 0.9866 | 0.0685 |
| LOC729885  | 0.9524 | 1.1324 | 1.0338 | 0.8276 | 0.9866 | 0.0645 |
| MIR194-2   | 0.9907 | 1.1113 | 1.0619 | 0.7824 | 0.9866 | 0.0724 |
| LOC442028  | 0.9581 | 1.0470 | 1.0518 | 0.8894 | 0.9866 | 0.0389 |
| LOC343384  | 0.9330 | 1.0417 | 1.0012 | 0.9704 | 0.9866 | 0.0231 |
| SNORA66    | 0.8936 | 1.0944 | 1.0687 | 0.8896 | 0.9866 | 0.0551 |
| C12orf23   | 0.9274 | 1.1404 | 1.1169 | 0.7617 | 0.9866 | 0.0888 |
| SCRIB      | 0.9162 | 1.2420 | 1.0001 | 0.7880 | 0.9866 | 0.0957 |
| ANUBL1     | 0.7807 | 1.1303 | 1.0428 | 0.9926 | 0.9866 | 0.0743 |
| PCDHGA6    | 0.9866 | 1.0809 | 0.9854 | 0.8935 | 0.9866 | 0.0382 |
| PLS1       | 0.8621 | 1.2035 | 1.1480 | 0.7328 | 0.9866 | 0.1129 |
| SFTPA1     | 0.9255 | 1.0153 | 1.1062 | 0.8994 | 0.9866 | 0.0470 |
| FOXA2      | 0.9606 | 1.0070 | 1.0357 | 0.9430 | 0.9866 | 0.0212 |
| ARRDC3     | 0.8678 | 1.3123 | 1.0512 | 0.7151 | 0.9866 | 0.1285 |
| EXD1       | 0.9614 | 1.0717 | 1.0222 | 0.8912 | 0.9866 | 0.0390 |
| LOC648133  | 1.0153 | 1.0230 | 0.9721 | 0.9361 | 0.9866 | 0.0202 |
| HBA2       | 0.9743 | 1.0255 | 0.9460 | 1.0007 | 0.9866 | 0.0171 |
| LOC391475  | 0.9326 | 1.0687 | 0.9956 | 0.9497 | 0.9866 | 0.0304 |
| LOC1001309 | 0.9535 | 1.1338 | 0.9193 | 0.9398 | 0.9866 | 0.0496 |
| LOC1001329 | 0.9238 | 1.1215 | 0.9422 | 0.9590 | 0.9866 | 0.0455 |
| LOC648943  | 0.9494 | 1.0492 | 0.9890 | 0.9589 | 0.9866 | 0.0225 |
| KRT18P30   | 0.9597 | 1.0616 | 1.0965 | 0.8287 | 0.9866 | 0.0601 |
| TTY11      | 0.8564 | 1.2110 | 0.9577 | 0.9214 | 0.9866 | 0.0777 |
| GRIK2      | 0.9709 | 1.0653 | 0.9864 | 0.9239 | 0.9866 | 0.0294 |
| LILRA3     | 0.9443 | 1.0241 | 1.0453 | 0.9328 | 0.9866 | 0.0282 |
| RPS6KL1    | 0.8640 | 1.1294 | 1.0500 | 0.9032 | 0.9866 | 0.0622 |
| MOBK2B     | 0.9210 | 1.0361 | 1.0440 | 0.9454 | 0.9866 | 0.0313 |
| OTUD7A     | 0.9157 | 1.1138 | 1.0660 | 0.8511 | 0.9866 | 0.0618 |
| LOC1001317 | 0.8917 | 1.0943 | 1.0931 | 0.8674 | 0.9866 | 0.0620 |
| MIR892B    | 0.8625 | 1.0548 | 1.0736 | 0.9557 | 0.9867 | 0.0488 |
| IFNE1      | 1.0055 | 1.0744 | 0.9974 | 0.8693 | 0.9867 | 0.0428 |
| ZP4        | 0.9115 | 1.1073 | 0.9505 | 0.9773 | 0.9867 | 0.0424 |
| LOC647460  | 0.9355 | 1.0613 | 1.0313 | 0.9185 | 0.9867 | 0.0351 |
| C3orf20    | 0.9907 | 1.0399 | 1.0599 | 0.8562 | 0.9867 | 0.0459 |



|            |        |        |        |        |        |        |
|------------|--------|--------|--------|--------|--------|--------|
| CLDN5      | 0.9592 | 1.0067 | 1.0520 | 0.9288 | 0.9867 | 0.0270 |
| LOC388458  | 0.9478 | 1.1659 | 0.9965 | 0.8365 | 0.9867 | 0.0685 |
| FLJ42102   | 0.9727 | 1.0692 | 0.9839 | 0.9209 | 0.9867 | 0.0307 |
| LOC642005  | 0.9981 | 1.1570 | 0.9941 | 0.7974 | 0.9867 | 0.0736 |
| LOC1001289 | 0.9276 | 1.1138 | 1.0271 | 0.8781 | 0.9867 | 0.0525 |
| KIAA1271   | 0.8590 | 1.1718 | 1.0323 | 0.8836 | 0.9867 | 0.0726 |
| KCNC2      | 0.9583 | 1.0602 | 1.0409 | 0.8873 | 0.9867 | 0.0398 |
| LOC1001279 | 0.9935 | 1.0910 | 0.9885 | 0.8737 | 0.9867 | 0.0445 |
| LOC653162  | 0.9765 | 1.1290 | 0.9138 | 0.9275 | 0.9867 | 0.0493 |
| LOC1001341 | 0.8996 | 1.1076 | 1.0256 | 0.9139 | 0.9867 | 0.0492 |
| PLXNA4B    | 0.9192 | 1.0334 | 1.0022 | 0.9920 | 0.9867 | 0.0242 |
| LOC730805  | 0.9351 | 1.0543 | 0.9652 | 0.9922 | 0.9867 | 0.0254 |
| LOC645545  | 1.0248 | 0.9496 | 1.0907 | 0.8816 | 0.9867 | 0.0454 |
| C20orf103  | 0.9052 | 1.0892 | 1.0172 | 0.9352 | 0.9867 | 0.0416 |
| LOC650933  | 0.8666 | 1.1768 | 1.0362 | 0.8672 | 0.9867 | 0.0749 |
| ARRDC1     | 0.9873 | 1.2241 | 0.9729 | 0.7625 | 0.9867 | 0.0943 |
| LOC731909  | 0.8965 | 1.0903 | 1.0346 | 0.9254 | 0.9867 | 0.0456 |
| NUDT9P1    | 0.9146 | 1.0174 | 1.0706 | 0.9442 | 0.9867 | 0.0353 |
| LOC729348  | 0.8564 | 1.2663 | 0.8908 | 0.9333 | 0.9867 | 0.0945 |
| PAX5       | 0.9587 | 1.0389 | 1.0850 | 0.8642 | 0.9867 | 0.0485 |
| ALMS1      | 1.0439 | 1.2269 | 0.8313 | 0.8447 | 0.9867 | 0.0937 |
| LY96       | 0.9942 | 1.0647 | 0.9845 | 0.9034 | 0.9867 | 0.0330 |
| PCDHA11    | 0.9569 | 1.1446 | 0.9255 | 0.9198 | 0.9867 | 0.0533 |
| BRUNOL4    | 0.9352 | 1.0988 | 1.0027 | 0.9101 | 0.9867 | 0.0422 |
| SPACA5B    | 0.9124 | 1.0876 | 1.0129 | 0.9339 | 0.9867 | 0.0400 |
| KMO        | 0.9880 | 1.0075 | 0.9851 | 0.9664 | 0.9867 | 0.0084 |
| NCAM1      | 0.9545 | 1.0807 | 0.9838 | 0.9279 | 0.9867 | 0.0334 |
| CCDC113    | 0.9842 | 1.1165 | 1.0593 | 0.7869 | 0.9867 | 0.0719 |
| HRCT1      | 0.9723 | 1.0476 | 0.9837 | 0.9433 | 0.9867 | 0.0220 |
| LOC653968  | 0.9151 | 1.0768 | 1.0646 | 0.8904 | 0.9867 | 0.0488 |
| LOC339804  | 0.9720 | 1.1358 | 0.9229 | 0.9163 | 0.9867 | 0.0512 |
| LOC731308  | 1.0137 | 1.0145 | 1.0801 | 0.8388 | 0.9867 | 0.0517 |
| SPATC1     | 0.9403 | 1.1229 | 0.9660 | 0.9178 | 0.9868 | 0.0464 |
| MIR548B    | 0.9003 | 1.1483 | 0.9695 | 0.9289 | 0.9868 | 0.0557 |
| MIR224     | 0.9566 | 1.0326 | 1.0443 | 0.9135 | 0.9868 | 0.0312 |
| TNRC6C     | 0.8969 | 1.1045 | 1.0639 | 0.8817 | 0.9868 | 0.0570 |
| L3MBTL4    | 0.8643 | 1.1518 | 1.0318 | 0.8993 | 0.9868 | 0.0658 |
| LOC151234  | 0.9364 | 1.0604 | 1.0834 | 0.8669 | 0.9868 | 0.0513 |
| EPB41L1    | 0.9645 | 1.0957 | 1.0052 | 0.8817 | 0.9868 | 0.0445 |
| LOC649385  | 0.9304 | 1.1197 | 0.8579 | 1.0390 | 0.9868 | 0.0579 |
| CMAH       | 0.9499 | 1.1402 | 0.9619 | 0.8950 | 0.9868 | 0.0532 |
| MYEF2      | 0.9113 | 1.0144 | 0.9982 | 1.0231 | 0.9868 | 0.0257 |
| MT1H       | 0.9559 | 1.0725 | 1.0283 | 0.8905 | 0.9868 | 0.0401 |
| LOC643085  | 0.9525 | 1.1295 | 1.0352 | 0.8300 | 0.9868 | 0.0636 |
| LOC728045  | 0.9763 | 1.0422 | 1.0866 | 0.8421 | 0.9868 | 0.0533 |
| LOC650392  | 0.9338 | 0.9992 | 1.0479 | 0.9663 | 0.9868 | 0.0243 |

|            |        |        |        |        |        |        |
|------------|--------|--------|--------|--------|--------|--------|
| EPS8L3     | 0.9753 | 1.0107 | 1.0182 | 0.9431 | 0.9868 | 0.0173 |
| LOC340228  | 1.0444 | 1.0947 | 0.9899 | 0.8182 | 0.9868 | 0.0601 |
| LOC644342  | 0.9121 | 1.0152 | 1.0948 | 0.9251 | 0.9868 | 0.0427 |
| LOC652355  | 0.8908 | 1.1118 | 1.0192 | 0.9255 | 0.9868 | 0.0497 |
| HIRA       | 0.9129 | 1.2199 | 0.9638 | 0.8508 | 0.9868 | 0.0810 |
| FXYD7      | 1.0732 | 0.9199 | 1.0363 | 0.9178 | 0.9868 | 0.0399 |
| LOC644802  | 0.9102 | 1.1035 | 0.9463 | 0.9873 | 0.9868 | 0.0420 |
| LOC1001284 | 0.9909 | 1.0718 | 1.0279 | 0.8566 | 0.9868 | 0.0464 |
| HCG22      | 0.9970 | 0.9236 | 1.0080 | 1.0187 | 0.9868 | 0.0215 |
| HTR2B      | 0.9590 | 0.9797 | 1.0897 | 0.9189 | 0.9868 | 0.0365 |
| LOC644717  | 1.0154 | 1.0971 | 0.9561 | 0.8787 | 0.9868 | 0.0462 |
| KRTAP13-1  | 0.9305 | 1.0764 | 1.0255 | 0.9150 | 0.9868 | 0.0386 |
| LGR5       | 0.9511 | 1.1509 | 1.0093 | 0.8361 | 0.9868 | 0.0655 |
| LOC653735  | 0.9630 | 1.0380 | 1.0816 | 0.8647 | 0.9868 | 0.0475 |
| AVPR1A     | 0.9032 | 1.0980 | 0.9961 | 0.9500 | 0.9868 | 0.0416 |
| LOC401537  | 0.7979 | 1.3939 | 1.0217 | 0.7338 | 0.9868 | 0.1491 |
| DNHL1      | 0.9840 | 1.0668 | 0.9378 | 0.9587 | 0.9869 | 0.0283 |
| SLC22A9    | 0.9811 | 1.0580 | 1.0499 | 0.8585 | 0.9869 | 0.0461 |
| LOC642514  | 0.9752 | 1.1093 | 1.0499 | 0.8131 | 0.9869 | 0.0641 |
| LOC651807  | 0.9113 | 1.1122 | 0.9882 | 0.9358 | 0.9869 | 0.0447 |
| KLKB1      | 1.0260 | 1.0793 | 0.9316 | 0.9106 | 0.9869 | 0.0397 |
| MIR450B    | 0.9177 | 1.0423 | 1.0834 | 0.9041 | 0.9869 | 0.0448 |
| LOC646365  | 0.9431 | 1.0963 | 1.0172 | 0.8909 | 0.9869 | 0.0447 |
| CAB39      | 0.9483 | 1.2757 | 0.9101 | 0.8135 | 0.9869 | 0.1004 |
| LOC645004  | 0.8910 | 1.1031 | 1.0767 | 0.8767 | 0.9869 | 0.0598 |
| TAS1R2     | 0.9888 | 0.9946 | 1.0381 | 0.9260 | 0.9869 | 0.0231 |
| RARRES1    | 0.9145 | 1.1006 | 1.0267 | 0.9058 | 0.9869 | 0.0469 |
| CSPG5      | 1.1033 | 1.2326 | 0.9244 | 0.6873 | 0.9869 | 0.1182 |
| LOC642110  | 0.9797 | 1.0838 | 0.9049 | 0.9791 | 0.9869 | 0.0368 |
| LOC389895  | 1.0771 | 1.0422 | 0.9567 | 0.8715 | 0.9869 | 0.0460 |
| ARHGAP8    | 0.9366 | 1.1294 | 1.0144 | 0.8672 | 0.9869 | 0.0562 |
| KANK1      | 0.9505 | 1.0601 | 1.0255 | 0.9115 | 0.9869 | 0.0340 |
| RGMB       | 0.8969 | 1.1640 | 1.0291 | 0.8576 | 0.9869 | 0.0695 |
| MFAP3      | 0.7996 | 1.3335 | 1.0249 | 0.7896 | 0.9869 | 0.1277 |
| LOC643132  | 0.9699 | 0.9865 | 1.0007 | 0.9906 | 0.9869 | 0.0064 |
| LOC1001318 | 0.9952 | 0.9505 | 1.0376 | 0.9644 | 0.9869 | 0.0193 |
| LOC729479  | 0.9915 | 1.0411 | 0.9703 | 0.9448 | 0.9869 | 0.0204 |
| MIR330     | 0.9190 | 1.0190 | 1.0965 | 0.9132 | 0.9869 | 0.0439 |
| LOC646778  | 0.9693 | 1.1507 | 0.9745 | 0.8532 | 0.9869 | 0.0613 |
| OR8A1      | 0.8932 | 1.1636 | 1.0102 | 0.8808 | 0.9869 | 0.0657 |
| MYST2      | 0.9360 | 1.2402 | 0.9580 | 0.8137 | 0.9870 | 0.0902 |
| FCGR2C     | 0.9852 | 0.9991 | 0.9834 | 0.9801 | 0.9870 | 0.0042 |
| LOC730063  | 0.8932 | 1.0780 | 1.0009 | 0.9758 | 0.9870 | 0.0381 |
| LOC1001285 | 0.9103 | 1.0786 | 1.0518 | 0.9072 | 0.9870 | 0.0455 |
| SLC9A3     | 0.8847 | 1.0359 | 1.0701 | 0.9572 | 0.9870 | 0.0415 |
| IL34       | 0.8342 | 1.0576 | 1.0820 | 0.9741 | 0.9870 | 0.0559 |

|            |        |        |        |        |        |        |
|------------|--------|--------|--------|--------|--------|--------|
| LOC730376  | 0.9007 | 1.1929 | 0.9875 | 0.8668 | 0.9870 | 0.0732 |
| SNORA36C   | 0.9554 | 1.1219 | 1.0378 | 0.8327 | 0.9870 | 0.0616 |
| MUC13      | 0.9498 | 1.0872 | 1.0215 | 0.8895 | 0.9870 | 0.0429 |
| ZNF642     | 1.0221 | 1.1108 | 0.9603 | 0.8547 | 0.9870 | 0.0538 |
| LOC1001318 | 0.8509 | 1.0652 | 1.0995 | 0.9323 | 0.9870 | 0.0579 |
| KCNJ12     | 0.9463 | 1.0426 | 0.9980 | 0.9610 | 0.9870 | 0.0215 |
| SNORA58    | 0.8152 | 1.1547 | 1.0472 | 0.9309 | 0.9870 | 0.0733 |
| LOC729681  | 0.9542 | 1.0271 | 1.0345 | 0.9322 | 0.9870 | 0.0257 |
| TMEM16A    | 0.9932 | 1.0705 | 0.9729 | 0.9114 | 0.9870 | 0.0328 |
| LOC650668  | 0.9337 | 1.0915 | 1.0345 | 0.8883 | 0.9870 | 0.0463 |
| HSPBAP1    | 0.8894 | 1.3106 | 0.9144 | 0.8336 | 0.9870 | 0.1092 |
| FLJ42291   | 1.0159 | 0.9933 | 1.0666 | 0.8723 | 0.9870 | 0.0412 |
| MIR1261    | 1.0090 | 1.0405 | 0.9805 | 0.9181 | 0.9870 | 0.0260 |
| ERBB4      | 0.9377 | 1.1454 | 0.9927 | 0.8723 | 0.9870 | 0.0583 |
| LOC730038  | 0.9168 | 1.0937 | 1.0380 | 0.8995 | 0.9870 | 0.0471 |
| LOC646096  | 1.0165 | 1.0733 | 0.9392 | 0.9190 | 0.9870 | 0.0356 |
| LOC400963  | 0.9207 | 1.1481 | 0.9411 | 0.9383 | 0.9870 | 0.0539 |
| LOC1001342 | 1.0161 | 1.0053 | 1.0438 | 0.8829 | 0.9870 | 0.0356 |
| KRTAP5-1   | 0.9159 | 1.1757 | 1.0599 | 0.7967 | 0.9871 | 0.0827 |
| LOC1001289 | 0.9408 | 1.0943 | 1.0113 | 0.9018 | 0.9871 | 0.0423 |
| FGF20      | 0.9985 | 1.0194 | 1.0119 | 0.9186 | 0.9871 | 0.0232 |
| LOC649604  | 0.9555 | 1.2220 | 0.9666 | 0.8041 | 0.9871 | 0.0866 |
| FAM90A18   | 1.0447 | 1.0418 | 0.9549 | 0.9069 | 0.9871 | 0.0339 |
| LOC649489  | 0.9393 | 1.0147 | 1.0051 | 0.9892 | 0.9871 | 0.0168 |
| LOC1001312 | 0.9472 | 1.0598 | 1.0157 | 0.9256 | 0.9871 | 0.0309 |
| GPR128     | 0.8877 | 1.1206 | 1.0482 | 0.8918 | 0.9871 | 0.0581 |
| SYNE1      | 0.9368 | 1.0584 | 1.0407 | 0.9124 | 0.9871 | 0.0366 |
| CCRL1      | 0.9744 | 1.0812 | 1.0243 | 0.8685 | 0.9871 | 0.0451 |
| LOC652557  | 0.9843 | 1.0146 | 1.0115 | 0.9379 | 0.9871 | 0.0177 |
| LOC651565  | 0.8904 | 1.1880 | 0.9998 | 0.8703 | 0.9871 | 0.0728 |
| TRIM17     | 0.9508 | 1.1559 | 0.9560 | 0.8857 | 0.9871 | 0.0585 |
| LOC1001343 | 1.0416 | 1.0747 | 0.9541 | 0.8780 | 0.9871 | 0.0444 |
| LOC650330  | 0.9059 | 1.1112 | 0.9649 | 0.9664 | 0.9871 | 0.0437 |
| LOC1001341 | 1.0168 | 1.0239 | 1.0529 | 0.8548 | 0.9871 | 0.0448 |
| LOC388578  | 0.9693 | 1.0273 | 1.1146 | 0.8374 | 0.9871 | 0.0582 |
| TNP1       | 0.9039 | 1.1639 | 1.0233 | 0.8573 | 0.9871 | 0.0685 |
| LOC440258  | 0.8835 | 1.0576 | 1.0223 | 0.9850 | 0.9871 | 0.0376 |
| VAV1       | 0.8719 | 1.1635 | 0.9548 | 0.9582 | 0.9871 | 0.0621 |
| MIR653     | 0.9658 | 1.0242 | 1.1011 | 0.8574 | 0.9871 | 0.0514 |
| CYP4Z2P    | 0.8986 | 1.0967 | 1.0403 | 0.9130 | 0.9871 | 0.0484 |
| LOC647288  | 0.8851 | 1.1255 | 1.0665 | 0.8715 | 0.9871 | 0.0640 |
| LOC728802  | 0.9339 | 1.0704 | 1.0138 | 0.9305 | 0.9871 | 0.0338 |
| LOC646630  | 0.9779 | 1.2389 | 1.0368 | 0.6950 | 0.9871 | 0.1123 |
| LOC1001295 | 0.9520 | 1.0641 | 1.0518 | 0.8808 | 0.9872 | 0.0434 |
| GABRB2     | 0.9863 | 1.0789 | 1.0248 | 0.8585 | 0.9872 | 0.0469 |
| SPSB1      | 0.8980 | 1.0783 | 0.9802 | 0.9922 | 0.9872 | 0.0369 |

|            |        |        |        |        |        |        |
|------------|--------|--------|--------|--------|--------|--------|
| PCCB       | 0.8091 | 1.3396 | 1.0257 | 0.7743 | 0.9872 | 0.1300 |
| TSPAN3     | 0.6587 | 1.4317 | 1.1290 | 0.7293 | 0.9872 | 0.1808 |
| TSPAN18    | 0.9410 | 1.1220 | 0.9612 | 0.9244 | 0.9872 | 0.0456 |
| RPL31      | 0.8442 | 1.0949 | 1.1924 | 0.8172 | 0.9872 | 0.0927 |
| LOC653635  | 0.8499 | 1.2429 | 0.9560 | 0.8999 | 0.9872 | 0.0880 |
| SCARF1     | 0.9757 | 1.0616 | 1.0232 | 0.8882 | 0.9872 | 0.0374 |
| MUC3B      | 0.9291 | 1.0385 | 1.0669 | 0.9142 | 0.9872 | 0.0384 |
| LOC645446  | 0.8786 | 1.0501 | 1.1078 | 0.9122 | 0.9872 | 0.0547 |
| LOC641989  | 0.9935 | 1.1221 | 0.9456 | 0.8875 | 0.9872 | 0.0499 |
| SEC14L3    | 0.8530 | 1.0405 | 1.0957 | 0.9596 | 0.9872 | 0.0527 |
| MYBPHL     | 1.0132 | 1.0685 | 0.9594 | 0.9076 | 0.9872 | 0.0346 |
| GPR152     | 0.9889 | 1.2180 | 0.9344 | 0.8074 | 0.9872 | 0.0858 |
| LOC647529  | 0.9000 | 1.0815 | 1.0770 | 0.8902 | 0.9872 | 0.0532 |
| LOC731366  | 1.0313 | 1.0418 | 0.9769 | 0.8987 | 0.9872 | 0.0327 |
| LCE1E      | 0.9599 | 1.0457 | 1.0408 | 0.9024 | 0.9872 | 0.0344 |
| LEP        | 0.9213 | 1.1180 | 1.0025 | 0.9069 | 0.9872 | 0.0484 |
| FTH1       | 0.8883 | 1.1253 | 1.2217 | 0.7136 | 0.9872 | 0.1150 |
| LOC647537  | 0.9299 | 1.0207 | 1.0443 | 0.9540 | 0.9872 | 0.0270 |
| LOC647012  | 1.0032 | 1.1229 | 0.9581 | 0.8647 | 0.9872 | 0.0536 |
| MIR548K    | 0.9065 | 1.1179 | 0.9970 | 0.9275 | 0.9872 | 0.0477 |
| FAM108A2   | 0.8051 | 1.4797 | 0.9391 | 0.7249 | 0.9872 | 0.1700 |
| NPBWR2     | 1.0141 | 1.0788 | 0.9334 | 0.9226 | 0.9872 | 0.0367 |
| LOC642295  | 0.9494 | 1.0284 | 1.0707 | 0.9005 | 0.9872 | 0.0383 |
| MVP        | 0.9086 | 1.2261 | 1.0315 | 0.7827 | 0.9872 | 0.0944 |
| LGALS9     | 0.9405 | 1.0692 | 0.9699 | 0.9694 | 0.9872 | 0.0282 |
| OMA1       | 0.8233 | 1.3558 | 1.0593 | 0.7107 | 0.9872 | 0.1427 |
| SLC2A7     | 0.8999 | 1.0594 | 0.9607 | 1.0291 | 0.9873 | 0.0357 |
| LOC648745  | 0.9850 | 1.0566 | 1.0321 | 0.8754 | 0.9873 | 0.0401 |
| SELPLG     | 1.0572 | 1.0894 | 0.9231 | 0.8794 | 0.9873 | 0.0509 |
| MIR107     | 0.9399 | 1.0477 | 1.0918 | 0.8697 | 0.9873 | 0.0505 |
| LOC644197  | 0.9719 | 1.1706 | 0.9110 | 0.8955 | 0.9873 | 0.0633 |
| MIR363     | 1.0204 | 1.0554 | 0.9774 | 0.8959 | 0.9873 | 0.0344 |
| USP17L5    | 0.8855 | 1.0371 | 0.9659 | 1.0607 | 0.9873 | 0.0395 |
| BAI1       | 0.9209 | 1.0642 | 1.0296 | 0.9344 | 0.9873 | 0.0353 |
| LOC642237  | 0.9777 | 0.9918 | 1.0705 | 0.9091 | 0.9873 | 0.0331 |
| RNU4-2     | 0.6984 | 1.1963 | 1.2175 | 0.8369 | 0.9873 | 0.1300 |
| LOC401354  | 0.8633 | 1.1837 | 1.0340 | 0.8682 | 0.9873 | 0.0765 |
| LOC642305  | 0.9368 | 1.0686 | 1.0214 | 0.9224 | 0.9873 | 0.0348 |
| LOC345537  | 1.0389 | 1.0613 | 0.9758 | 0.8733 | 0.9873 | 0.0421 |
| LOC1001296 | 0.9075 | 1.1199 | 0.9998 | 0.9220 | 0.9873 | 0.0486 |
| LOC1001343 | 0.9269 | 1.1409 | 0.9449 | 0.9365 | 0.9873 | 0.0513 |
| TTPA       | 0.9004 | 1.0408 | 1.0856 | 0.9224 | 0.9873 | 0.0450 |
| LOC345630  | 0.9883 | 1.0854 | 0.9030 | 0.9725 | 0.9873 | 0.0376 |
| SNORD105   | 0.9632 | 0.9943 | 1.1227 | 0.8690 | 0.9873 | 0.0524 |
| RHBDL1     | 0.9536 | 0.9755 | 1.1350 | 0.8851 | 0.9873 | 0.0529 |
| CDH4       | 0.8844 | 1.0404 | 1.0853 | 0.9391 | 0.9873 | 0.0460 |

|            |        |        |        |        |        |        |
|------------|--------|--------|--------|--------|--------|--------|
| EMR1       | 0.9291 | 1.1063 | 1.0012 | 0.9126 | 0.9873 | 0.0441 |
| CDC14A     | 0.9221 | 1.1355 | 1.0090 | 0.8827 | 0.9873 | 0.0560 |
| C4orf51    | 0.9194 | 0.9529 | 1.1447 | 0.9323 | 0.9873 | 0.0529 |
| TTC35      | 0.8260 | 1.1673 | 1.2051 | 0.7510 | 0.9873 | 0.1161 |
| PGM5       | 0.9544 | 1.0243 | 1.0483 | 0.9223 | 0.9873 | 0.0294 |
| LOC1001340 | 0.9637 | 1.0095 | 1.0253 | 0.9509 | 0.9873 | 0.0178 |
| GIMAP7     | 0.8892 | 1.1461 | 1.0122 | 0.9019 | 0.9874 | 0.0597 |
| LOC653609  | 1.1423 | 1.0104 | 0.9130 | 0.8838 | 0.9874 | 0.0583 |
| ERCC-00098 | 0.9660 | 1.0750 | 0.9504 | 0.9580 | 0.9874 | 0.0294 |
| KLF14      | 0.9290 | 1.0594 | 1.0327 | 0.9283 | 0.9874 | 0.0343 |
| C11orf57   | 1.0272 | 1.1404 | 0.9747 | 0.8071 | 0.9874 | 0.0693 |
| PDGFRB     | 0.9492 | 1.1424 | 1.0283 | 0.8295 | 0.9874 | 0.0659 |
| LOC649092  | 1.0121 | 1.0654 | 0.9822 | 0.8898 | 0.9874 | 0.0368 |
| AMDHD1     | 1.0144 | 1.1516 | 0.8529 | 0.9306 | 0.9874 | 0.0639 |
| CXCL6      | 0.9355 | 1.0615 | 1.0258 | 0.9267 | 0.9874 | 0.0333 |
| UNQ9433    | 0.9633 | 1.0564 | 0.9607 | 0.9691 | 0.9874 | 0.0231 |
| LOC647513  | 0.9191 | 1.1639 | 1.0437 | 0.8229 | 0.9874 | 0.0742 |
| B3GALT3    | 0.9672 | 1.0949 | 0.9944 | 0.8930 | 0.9874 | 0.0418 |
| PRDM4      | 0.8337 | 1.4020 | 0.9171 | 0.7968 | 0.9874 | 0.1405 |
| DEPDC7     | 0.8858 | 1.0794 | 1.0794 | 0.9051 | 0.9874 | 0.0532 |
| KIAA0889   | 0.9095 | 1.0849 | 1.0139 | 0.9413 | 0.9874 | 0.0392 |
| LOC1001334 | 0.9057 | 1.1433 | 0.9454 | 0.9553 | 0.9874 | 0.0530 |
| LOC652656  | 0.9415 | 1.0261 | 1.0995 | 0.8826 | 0.9874 | 0.0476 |
| GALC       | 0.9289 | 1.0468 | 1.0230 | 0.9509 | 0.9874 | 0.0282 |
| LOC1001334 | 1.0629 | 0.9453 | 0.9947 | 0.9467 | 0.9874 | 0.0277 |
| ACAT2      | 1.0280 | 1.2042 | 0.9828 | 0.7347 | 0.9874 | 0.0968 |
| LOC654264  | 0.9516 | 1.0113 | 1.0126 | 0.9742 | 0.9874 | 0.0149 |
| VGLL3      | 0.8836 | 1.1758 | 1.0065 | 0.8838 | 0.9874 | 0.0692 |
| LOC653165  | 0.9316 | 1.0815 | 1.0232 | 0.9133 | 0.9874 | 0.0395 |
| LOC1001314 | 0.9323 | 1.0434 | 1.0294 | 0.9446 | 0.9874 | 0.0285 |
| LOC645981  | 1.0244 | 0.9814 | 1.0200 | 0.9240 | 0.9874 | 0.0232 |
| PRNT       | 0.9421 | 1.0529 | 1.1067 | 0.8481 | 0.9875 | 0.0577 |
| LOC653140  | 0.9013 | 1.0736 | 1.1047 | 0.8702 | 0.9875 | 0.0594 |
| LOC654187  | 1.0348 | 1.0533 | 0.9697 | 0.8922 | 0.9875 | 0.0365 |
| SLC22A16   | 0.9479 | 1.0690 | 0.9534 | 0.9796 | 0.9875 | 0.0281 |
| ERMAP      | 0.9733 | 1.1448 | 1.0087 | 0.8231 | 0.9875 | 0.0661 |
| LOC646155  | 0.9627 | 1.0147 | 1.0876 | 0.8851 | 0.9875 | 0.0427 |
| LOC730686  | 0.9425 | 1.1062 | 1.0161 | 0.8851 | 0.9875 | 0.0478 |
| XKRY2      | 0.9031 | 1.0881 | 0.9988 | 0.9599 | 0.9875 | 0.0389 |
| LOC339240  | 0.9610 | 1.0523 | 1.0374 | 0.8993 | 0.9875 | 0.0356 |
| LOC1001312 | 0.9721 | 1.0830 | 1.0646 | 0.8303 | 0.9875 | 0.0577 |
| SULT1C3    | 1.0525 | 1.0691 | 0.9695 | 0.8588 | 0.9875 | 0.0481 |
| LOC650708  | 0.9362 | 1.0128 | 1.0564 | 0.9445 | 0.9875 | 0.0287 |
| LOC728291  | 0.9574 | 1.0962 | 1.0215 | 0.8749 | 0.9875 | 0.0471 |
| ANKRD42    | 0.9258 | 1.1126 | 1.0034 | 0.9083 | 0.9875 | 0.0465 |
| SLC28A3    | 0.9010 | 1.0526 | 1.0212 | 0.9753 | 0.9875 | 0.0329 |

|            |        |        |        |        |        |        |
|------------|--------|--------|--------|--------|--------|--------|
| LOC1001347 | 0.9467 | 1.0872 | 1.1039 | 0.8122 | 0.9875 | 0.0682 |
| LOC648148  | 0.8819 | 1.0651 | 1.0480 | 0.9551 | 0.9875 | 0.0427 |
| CRP        | 0.9410 | 1.1196 | 0.9512 | 0.9384 | 0.9875 | 0.0441 |
| MGC40069   | 0.9234 | 0.8934 | 1.1535 | 0.9799 | 0.9875 | 0.0582 |
| C2orf71    | 0.9243 | 1.1220 | 1.0200 | 0.8838 | 0.9875 | 0.0531 |
| UNC5B      | 1.0104 | 1.0883 | 0.9287 | 0.9228 | 0.9875 | 0.0391 |
| LOC1001311 | 1.0248 | 0.9628 | 1.0391 | 0.9235 | 0.9876 | 0.0270 |
| KRTAP12-4  | 0.9420 | 1.0827 | 1.0193 | 0.9062 | 0.9876 | 0.0395 |
| LOC648604  | 1.0046 | 1.1913 | 0.8736 | 0.8807 | 0.9876 | 0.0743 |
| LOC1001310 | 1.0093 | 1.0292 | 1.0647 | 0.8471 | 0.9876 | 0.0482 |
| FLJ32575   | 0.9259 | 1.0082 | 1.0686 | 0.9475 | 0.9876 | 0.0322 |
| RPL31P10   | 0.8598 | 1.0904 | 1.0888 | 0.9113 | 0.9876 | 0.0598 |
| HSD17B7P2  | 0.9852 | 1.1260 | 1.1224 | 0.7167 | 0.9876 | 0.0961 |
| LOC648123  | 0.9931 | 1.1065 | 0.9792 | 0.8716 | 0.9876 | 0.0480 |
| MPO        | 0.9097 | 1.1747 | 0.9610 | 0.9049 | 0.9876 | 0.0636 |
| ZNF155     | 0.9548 | 1.1515 | 0.9704 | 0.8737 | 0.9876 | 0.0586 |
| B3GAT1     | 0.8881 | 1.0771 | 1.0648 | 0.9203 | 0.9876 | 0.0486 |
| LOC644188  | 0.9674 | 0.9240 | 1.2246 | 0.8343 | 0.9876 | 0.0837 |
| FCRL1      | 0.8521 | 1.1775 | 1.0973 | 0.8234 | 0.9876 | 0.0882 |
| SLC24A1    | 0.9289 | 1.0801 | 1.0546 | 0.8867 | 0.9876 | 0.0471 |
| ERCC-00137 | 0.8555 | 1.1433 | 1.0557 | 0.8958 | 0.9876 | 0.0676 |
| C21orf131  | 0.8736 | 1.0735 | 1.0346 | 0.9687 | 0.9876 | 0.0437 |
| LOC1001889 | 0.9760 | 1.0425 | 1.0748 | 0.8570 | 0.9876 | 0.0481 |
| ZSCAN1     | 1.0314 | 1.0832 | 1.0453 | 0.7905 | 0.9876 | 0.0666 |
| MBD1       | 0.9707 | 1.1896 | 0.9692 | 0.8209 | 0.9876 | 0.0760 |
| ZNF767     | 0.8860 | 1.2078 | 0.9671 | 0.8895 | 0.9876 | 0.0758 |
| UBOX5      | 0.8883 | 1.2513 | 1.0449 | 0.7659 | 0.9876 | 0.1048 |
| XKRY       | 0.9786 | 1.0770 | 1.0248 | 0.8699 | 0.9876 | 0.0441 |
| DMRT1      | 1.0175 | 1.0386 | 1.0199 | 0.8744 | 0.9876 | 0.0380 |
| CHRM2      | 0.9806 | 1.0582 | 1.0058 | 0.9058 | 0.9876 | 0.0317 |
| LOC652086  | 0.9926 | 1.0045 | 0.9979 | 0.9555 | 0.9876 | 0.0110 |
| LOC1001279 | 1.0082 | 1.0864 | 0.9793 | 0.8766 | 0.9876 | 0.0434 |
| OBSCN      | 0.9578 | 1.1618 | 0.9009 | 0.9301 | 0.9876 | 0.0592 |
| USP44      | 0.9801 | 1.0685 | 0.9769 | 0.9250 | 0.9876 | 0.0298 |
| FLJ35880   | 0.9415 | 1.1470 | 1.0174 | 0.8447 | 0.9876 | 0.0638 |
| LOC654165  | 0.8709 | 1.0860 | 1.0593 | 0.9343 | 0.9876 | 0.0511 |
| RASGRP4    | 1.0088 | 1.0744 | 0.9678 | 0.8996 | 0.9876 | 0.0366 |
| LOC642629  | 0.8559 | 1.1291 | 1.0810 | 0.8847 | 0.9876 | 0.0687 |
| RS1        | 0.9841 | 1.1486 | 0.9058 | 0.9120 | 0.9876 | 0.0565 |
| LOC648217  | 1.0186 | 0.9584 | 1.0805 | 0.8930 | 0.9877 | 0.0402 |
| CD34       | 0.9065 | 1.0385 | 1.0722 | 0.9334 | 0.9877 | 0.0401 |
| MIR196A2   | 0.8948 | 1.0213 | 1.1117 | 0.9228 | 0.9877 | 0.0495 |
| WFDC9      | 0.9418 | 1.0175 | 0.9957 | 0.9957 | 0.9877 | 0.0161 |
| STOX1      | 0.9527 | 1.0987 | 0.9908 | 0.9084 | 0.9877 | 0.0407 |
| SLC6A1     | 1.0187 | 1.0660 | 1.0070 | 0.8589 | 0.9877 | 0.0448 |
| APOB       | 0.9169 | 1.0513 | 1.0791 | 0.9034 | 0.9877 | 0.0452 |

|            |        |        |        |        |        |        |
|------------|--------|--------|--------|--------|--------|--------|
| LOC730743  | 0.9336 | 1.0543 | 1.0313 | 0.9315 | 0.9877 | 0.0322 |
| SLC22A8    | 0.9630 | 1.0304 | 1.0291 | 0.9282 | 0.9877 | 0.0253 |
| THPO       | 0.9728 | 1.0491 | 1.0230 | 0.9059 | 0.9877 | 0.0315 |
| CORO6      | 0.9186 | 1.1783 | 1.0627 | 0.7911 | 0.9877 | 0.0843 |
| LOC1001336 | 0.9697 | 1.1582 | 0.9697 | 0.8531 | 0.9877 | 0.0631 |
| LOC643783  | 1.0204 | 1.1265 | 0.9826 | 0.8212 | 0.9877 | 0.0633 |
| ABCB8      | 0.9122 | 1.0261 | 1.0972 | 0.9153 | 0.9877 | 0.0451 |
| LOC1001303 | 0.9977 | 1.0166 | 1.0380 | 0.8985 | 0.9877 | 0.0309 |
| RGS21      | 0.9373 | 1.3111 | 0.9004 | 0.8019 | 0.9877 | 0.1115 |
| TET3       | 0.9214 | 1.1327 | 0.9877 | 0.9090 | 0.9877 | 0.0513 |
| LOC654020  | 0.8383 | 1.0689 | 1.0520 | 0.9915 | 0.9877 | 0.0525 |
| LOC341346  | 0.8972 | 1.0298 | 1.0025 | 1.0213 | 0.9877 | 0.0307 |
| RBAK       | 1.0120 | 1.1612 | 0.9210 | 0.8566 | 0.9877 | 0.0660 |
| CD37       | 0.9515 | 1.1361 | 0.9791 | 0.8841 | 0.9877 | 0.0533 |
| C1orf89    | 0.7982 | 1.1935 | 1.1152 | 0.8440 | 0.9877 | 0.0980 |
| LOC1001290 | 0.8867 | 1.1187 | 1.0594 | 0.8862 | 0.9877 | 0.0597 |
| EPS8L1     | 0.9102 | 1.1712 | 0.9811 | 0.8884 | 0.9877 | 0.0643 |
| LOC402110  | 0.9791 | 1.1583 | 1.0298 | 0.7838 | 0.9877 | 0.0778 |
| OR2M2      | 1.0246 | 1.0013 | 0.9988 | 0.9262 | 0.9877 | 0.0213 |
| LOC651772  | 0.8873 | 1.2231 | 1.0314 | 0.8092 | 0.9878 | 0.0910 |
| PNMA6B     | 0.9381 | 1.1217 | 0.9064 | 0.9848 | 0.9878 | 0.0475 |
| LOC644144  | 0.9588 | 1.2340 | 0.9690 | 0.7892 | 0.9878 | 0.0919 |
| LOC727842  | 0.9610 | 0.9951 | 1.0932 | 0.9018 | 0.9878 | 0.0401 |
| LOC642578  | 0.9117 | 1.1402 | 1.0291 | 0.8700 | 0.9878 | 0.0610 |
| C16orf72   | 0.9174 | 1.3404 | 1.0217 | 0.6715 | 0.9878 | 0.1386 |
| STAT5A     | 0.8516 | 1.2341 | 1.0056 | 0.8598 | 0.9878 | 0.0894 |
| LOC648490  | 0.9997 | 1.2110 | 0.8912 | 0.8493 | 0.9878 | 0.0809 |
| LOC1001321 | 0.9754 | 1.1111 | 1.0426 | 0.8220 | 0.9878 | 0.0618 |
| LGALS9C    | 0.9433 | 1.0959 | 0.9302 | 0.9818 | 0.9878 | 0.0377 |
| SPAG8      | 0.9365 | 1.1352 | 0.9981 | 0.8812 | 0.9878 | 0.0546 |
| CLCN1      | 0.9198 | 1.1724 | 1.0043 | 0.8547 | 0.9878 | 0.0687 |
| C17orf66   | 0.8936 | 1.1069 | 0.9821 | 0.9686 | 0.9878 | 0.0442 |
| MIR548F5   | 0.9377 | 1.0736 | 1.0091 | 0.9307 | 0.9878 | 0.0336 |
| LOC731074  | 0.9822 | 1.2334 | 0.9536 | 0.7821 | 0.9878 | 0.0930 |
| FMO5       | 1.0240 | 1.1849 | 0.9121 | 0.8302 | 0.9878 | 0.0768 |
| LOC1001342 | 0.9296 | 1.1456 | 1.0304 | 0.8457 | 0.9878 | 0.0647 |
| KLHDC1     | 0.9286 | 1.0415 | 0.9805 | 1.0007 | 0.9878 | 0.0235 |
| NKX1-2     | 0.8971 | 1.0513 | 0.9921 | 1.0109 | 0.9878 | 0.0327 |
| PKD1P1     | 0.8618 | 1.0822 | 1.1410 | 0.8664 | 0.9878 | 0.0725 |
| LOC1001302 | 0.9154 | 1.1277 | 1.0159 | 0.8923 | 0.9878 | 0.0538 |
| MMAB       | 1.0794 | 1.2367 | 0.8220 | 0.8133 | 0.9878 | 0.1034 |
| MYT1L      | 0.9826 | 1.0306 | 1.0358 | 0.9024 | 0.9878 | 0.0309 |
| MSTP9      | 0.9907 | 1.0130 | 0.9749 | 0.9729 | 0.9879 | 0.0093 |
| LOC643401  | 1.0065 | 1.0439 | 0.9891 | 0.9120 | 0.9879 | 0.0278 |
| DNMT3A     | 0.9622 | 1.0638 | 1.0159 | 0.9095 | 0.9879 | 0.0334 |
| LOC440503  | 0.8600 | 1.2613 | 0.9466 | 0.8837 | 0.9879 | 0.0929 |

|            |        |        |        |        |        |        |
|------------|--------|--------|--------|--------|--------|--------|
| NFIA       | 0.8093 | 1.2684 | 1.1423 | 0.7315 | 0.9879 | 0.1292 |
| TAS2R40    | 1.0288 | 1.0387 | 0.9645 | 0.9195 | 0.9879 | 0.0281 |
| LOC653163  | 0.7995 | 1.1909 | 1.0350 | 0.9260 | 0.9879 | 0.0830 |
| TBC1D22A   | 0.9244 | 1.2180 | 1.0068 | 0.8023 | 0.9879 | 0.0875 |
| OXER1      | 0.9217 | 1.0879 | 0.9101 | 1.0318 | 0.9879 | 0.0432 |
| LOC1001322 | 0.8065 | 1.1251 | 1.0588 | 0.9611 | 0.9879 | 0.0692 |
| LOC647269  | 0.9361 | 1.0203 | 1.0526 | 0.9426 | 0.9879 | 0.0288 |
| KY         | 0.9513 | 1.0980 | 1.0242 | 0.8781 | 0.9879 | 0.0473 |
| SIK2       | 0.9390 | 1.1289 | 1.0396 | 0.8441 | 0.9879 | 0.0617 |
| LOC400942  | 1.0279 | 1.0701 | 0.9671 | 0.8864 | 0.9879 | 0.0399 |
| CD40LG     | 0.8847 | 1.0317 | 1.0343 | 1.0009 | 0.9879 | 0.0352 |
| LOC653605  | 0.8795 | 0.9970 | 1.1137 | 0.9613 | 0.9879 | 0.0486 |
| ADAMTS18   | 0.9161 | 1.1580 | 1.0483 | 0.8293 | 0.9879 | 0.0724 |
| C4BPA      | 0.9228 | 0.9800 | 1.0592 | 0.9895 | 0.9879 | 0.0280 |
| LOC1001310 | 0.9879 | 1.0350 | 0.9700 | 0.9587 | 0.9879 | 0.0168 |
| ASB3       | 0.8798 | 1.3120 | 0.9584 | 0.8014 | 0.9879 | 0.1127 |
| CD109      | 0.9590 | 1.1596 | 0.9058 | 0.9273 | 0.9879 | 0.0583 |
| LOC643397  | 0.9410 | 1.1038 | 1.0286 | 0.8782 | 0.9879 | 0.0494 |
| MYOM3      | 0.9514 | 1.0547 | 1.0496 | 0.8961 | 0.9879 | 0.0388 |
| SNCA       | 0.9276 | 1.0845 | 1.0523 | 0.8873 | 0.9879 | 0.0476 |
| DUSP4      | 0.8827 | 1.1421 | 1.0072 | 0.9198 | 0.9879 | 0.0576 |
| CCDC116    | 0.9492 | 1.0655 | 1.1061 | 0.8310 | 0.9879 | 0.0620 |
| TMEM38B    | 0.8427 | 1.4685 | 0.9351 | 0.7055 | 0.9879 | 0.1670 |
| ST8SIA3    | 1.0015 | 1.0143 | 1.0559 | 0.8801 | 0.9879 | 0.0378 |
| LOC643998  | 0.9632 | 1.1261 | 1.0171 | 0.8455 | 0.9879 | 0.0583 |
| BCL9L      | 1.0745 | 1.1989 | 0.9206 | 0.7578 | 0.9880 | 0.0955 |
| DCAF4L1    | 0.9074 | 1.0718 | 1.0309 | 0.9417 | 0.9880 | 0.0382 |
| AKR7L      | 0.9653 | 1.0636 | 0.9751 | 0.9478 | 0.9880 | 0.0258 |
| SLC10A1    | 0.9989 | 1.0480 | 0.9645 | 0.9406 | 0.9880 | 0.0233 |
| LOC642914  | 1.0764 | 1.0335 | 0.9548 | 0.8872 | 0.9880 | 0.0420 |
| SPTB       | 0.9146 | 1.0512 | 1.0404 | 0.9457 | 0.9880 | 0.0340 |
| LOC647718  | 0.9968 | 1.0949 | 1.0155 | 0.8447 | 0.9880 | 0.0523 |
| ST6GALNAC5 | 1.0275 | 0.9609 | 1.0354 | 0.9280 | 0.9880 | 0.0261 |
| LRIT2      | 0.9139 | 1.0779 | 1.0866 | 0.8735 | 0.9880 | 0.0551 |
| SPHKAP     | 1.0122 | 1.0326 | 1.0121 | 0.8950 | 0.9880 | 0.0313 |
| C16orf69   | 0.9492 | 1.1086 | 1.0052 | 0.8889 | 0.9880 | 0.0467 |
| LOC649210  | 0.8576 | 1.2066 | 1.0047 | 0.8830 | 0.9880 | 0.0796 |
| NTRK3      | 0.8814 | 1.0611 | 1.0617 | 0.9477 | 0.9880 | 0.0445 |
| RNF180     | 0.9070 | 1.0938 | 1.0642 | 0.8869 | 0.9880 | 0.0531 |
| FAM194A    | 1.0207 | 1.0569 | 0.9423 | 0.9321 | 0.9880 | 0.0303 |
| GALNTL6    | 0.9077 | 0.9984 | 1.0546 | 0.9913 | 0.9880 | 0.0303 |
| C14orf176  | 0.7230 | 1.0939 | 1.1188 | 1.0163 | 0.9880 | 0.0910 |
| GDPD3      | 0.9746 | 1.0377 | 1.0346 | 0.9050 | 0.9880 | 0.0312 |
| LOC1001290 | 0.9972 | 1.0441 | 1.0261 | 0.8846 | 0.9880 | 0.0358 |
| LOC340529  | 0.9654 | 1.0784 | 0.9892 | 0.9190 | 0.9880 | 0.0335 |
| GDAP1L1    | 0.9971 | 1.0751 | 0.9485 | 0.9314 | 0.9880 | 0.0322 |



|            |        |        |        |        |        |        |
|------------|--------|--------|--------|--------|--------|--------|
| LOC649686  | 0.8513 | 1.1298 | 1.0199 | 0.9510 | 0.9880 | 0.0586 |
| PCNP       | 0.8668 | 1.3423 | 1.0548 | 0.6882 | 0.9880 | 0.1398 |
| FSCB       | 1.0062 | 1.0217 | 1.1206 | 0.8035 | 0.9880 | 0.0665 |
| LOC1001310 | 0.9709 | 1.0504 | 1.0382 | 0.8925 | 0.9880 | 0.0363 |
| AMPD1      | 0.9400 | 1.1212 | 0.9916 | 0.8992 | 0.9880 | 0.0483 |
| STARD4     | 0.9926 | 1.0352 | 1.0076 | 0.9167 | 0.9880 | 0.0253 |
| TMEM169    | 1.0396 | 1.1458 | 0.8699 | 0.8968 | 0.9880 | 0.0644 |
| LOC645263  | 0.8758 | 1.1293 | 1.0712 | 0.8758 | 0.9880 | 0.0659 |
| LOC644472  | 0.9418 | 1.1925 | 0.9727 | 0.8452 | 0.9880 | 0.0733 |
| FRG2B      | 0.9644 | 1.0878 | 0.9907 | 0.9092 | 0.9880 | 0.0373 |
| ZNF70      | 1.0148 | 1.0743 | 1.0145 | 0.8485 | 0.9880 | 0.0486 |
| SNORA52    | 0.9196 | 1.0372 | 0.9881 | 1.0073 | 0.9880 | 0.0250 |
| LOC729777  | 0.9649 | 0.9445 | 1.0892 | 0.9535 | 0.9880 | 0.0340 |
| AHSG       | 0.9908 | 1.1049 | 0.8885 | 0.9681 | 0.9880 | 0.0447 |
| LOC652238  | 1.0603 | 0.9503 | 1.0346 | 0.9070 | 0.9881 | 0.0358 |
| BMPR1B     | 1.0327 | 1.1270 | 0.9673 | 0.8252 | 0.9881 | 0.0634 |
| SNORD126   | 0.9731 | 1.0172 | 0.9952 | 0.9667 | 0.9881 | 0.0115 |
| MGC119295  | 0.9719 | 1.0952 | 1.0895 | 0.7957 | 0.9881 | 0.0701 |
| LOC649320  | 0.9994 | 0.9736 | 0.9936 | 0.9857 | 0.9881 | 0.0056 |
| CYP2C8     | 0.9733 | 1.1048 | 1.0259 | 0.8484 | 0.9881 | 0.0538 |
| LOC644172  | 0.8685 | 1.2225 | 1.0609 | 0.8004 | 0.9881 | 0.0957 |
| MOGAT1     | 0.9629 | 1.1348 | 0.8889 | 0.9656 | 0.9881 | 0.0520 |
| RNF12      | 0.9693 | 1.0712 | 1.0229 | 0.8890 | 0.9881 | 0.0390 |
| PRAM1      | 0.8948 | 1.0637 | 1.0575 | 0.9364 | 0.9881 | 0.0427 |
| ASAM       | 0.9197 | 1.1197 | 1.0052 | 0.9079 | 0.9881 | 0.0489 |
| ODF3L1     | 0.9244 | 1.1461 | 0.9626 | 0.9193 | 0.9881 | 0.0535 |
| LOC645870  | 0.8809 | 1.0998 | 1.0905 | 0.8813 | 0.9881 | 0.0618 |
| KIAA0692   | 0.9102 | 1.1170 | 0.9977 | 0.9275 | 0.9881 | 0.0469 |
| LOC644591  | 0.9733 | 1.1063 | 0.9473 | 0.9256 | 0.9881 | 0.0406 |
| KLHL29     | 0.8439 | 1.2813 | 0.9713 | 0.8560 | 0.9881 | 0.1018 |
| RAXL1      | 0.8971 | 1.2716 | 0.9366 | 0.8473 | 0.9881 | 0.0962 |
| CNTN4      | 0.8777 | 1.1536 | 1.0029 | 0.9182 | 0.9881 | 0.0610 |
| LOC653227  | 0.9805 | 1.1512 | 0.9738 | 0.8471 | 0.9881 | 0.0624 |
| FLJ37673   | 1.0066 | 1.0568 | 1.0021 | 0.8871 | 0.9881 | 0.0359 |
| LOC1001284 | 1.0166 | 1.0383 | 0.9886 | 0.9092 | 0.9881 | 0.0282 |
| LOC1001339 | 0.9125 | 1.1096 | 1.0561 | 0.8744 | 0.9881 | 0.0563 |
| AMIGO3     | 0.9951 | 1.2269 | 0.8681 | 0.8625 | 0.9882 | 0.0853 |
| CHR415SYT  | 0.9552 | 1.0269 | 1.1205 | 0.8500 | 0.9882 | 0.0572 |
| VAMP3      | 1.0820 | 1.1046 | 1.1104 | 0.6556 | 0.9882 | 0.1110 |
| C1orf210   | 0.9362 | 1.1197 | 0.9837 | 0.9131 | 0.9882 | 0.0462 |
| COX7A1     | 1.0515 | 1.0380 | 0.9756 | 0.8875 | 0.9882 | 0.0374 |
| KRTAP2-1   | 0.9130 | 1.0980 | 0.9813 | 0.9603 | 0.9882 | 0.0393 |
| LOC1001291 | 0.9682 | 1.0543 | 1.0227 | 0.9075 | 0.9882 | 0.0322 |
| C18orf51   | 0.9809 | 1.1103 | 0.9277 | 0.9338 | 0.9882 | 0.0424 |
| GAF3       | 0.9747 | 1.0078 | 1.0750 | 0.8953 | 0.9882 | 0.0373 |
| LOC646999  | 0.9777 | 1.0789 | 0.9931 | 0.9031 | 0.9882 | 0.0361 |

|           |        |        |        |        |        |        |
|-----------|--------|--------|--------|--------|--------|--------|
| LOC644450 | 0.8207 | 1.1829 | 1.0313 | 0.9179 | 0.9882 | 0.0779 |
| FOXS1     | 0.9559 | 1.1280 | 0.9467 | 0.9222 | 0.9882 | 0.0471 |
| SNORD98   | 0.8935 | 1.0642 | 1.0771 | 0.9180 | 0.9882 | 0.0479 |
| SYCP2     | 0.9799 | 0.9916 | 1.0629 | 0.9185 | 0.9882 | 0.0296 |
| APOBEC3G  | 0.9249 | 1.0769 | 1.0369 | 0.9142 | 0.9882 | 0.0405 |
| RGR       | 0.9170 | 1.1309 | 1.0079 | 0.8971 | 0.9882 | 0.0533 |
| ASB7      | 0.9165 | 1.1374 | 1.0006 | 0.8984 | 0.9882 | 0.0545 |
| MS4A4A    | 0.9241 | 1.0403 | 1.0414 | 0.9470 | 0.9882 | 0.0308 |
| ANKRD19   | 0.9146 | 1.0764 | 1.0655 | 0.8965 | 0.9882 | 0.0479 |
| WNT8A     | 0.9074 | 1.0469 | 1.0773 | 0.9213 | 0.9882 | 0.0432 |
| ANO7      | 0.9951 | 1.0690 | 0.9896 | 0.8993 | 0.9882 | 0.0347 |
| CCDC146   | 0.9308 | 1.0528 | 1.0259 | 0.9436 | 0.9882 | 0.0301 |
| C1orf140  | 0.9772 | 1.0409 | 1.0532 | 0.8817 | 0.9883 | 0.0392 |
| CLEC6A    | 1.0154 | 1.0640 | 1.0253 | 0.8483 | 0.9883 | 0.0478 |
| LOC645960 | 0.9489 | 0.9803 | 1.0327 | 0.9912 | 0.9883 | 0.0173 |
| HIST1H2BM | 0.9723 | 1.0871 | 1.0476 | 0.8460 | 0.9883 | 0.0531 |
| LOC727757 | 0.9651 | 1.1796 | 0.9411 | 0.8672 | 0.9883 | 0.0671 |
| WBP11P1   | 0.9812 | 1.0856 | 1.0138 | 0.8725 | 0.9883 | 0.0443 |
| OR10T2    | 0.9510 | 1.0706 | 1.0555 | 0.8759 | 0.9883 | 0.0459 |
| HOXB4     | 0.9086 | 1.0704 | 1.1507 | 0.8234 | 0.9883 | 0.0745 |
| LOC342346 | 0.9221 | 1.2205 | 0.9807 | 0.8298 | 0.9883 | 0.0834 |
| KIAA1370  | 0.9315 | 1.3754 | 0.9215 | 0.7247 | 0.9883 | 0.1375 |
| OR10Q1    | 0.9576 | 1.0274 | 1.0737 | 0.8944 | 0.9883 | 0.0394 |
| GSC       | 0.9419 | 1.1920 | 0.9522 | 0.8670 | 0.9883 | 0.0705 |
| ODF3L2    | 0.9023 | 1.0799 | 1.0627 | 0.9083 | 0.9883 | 0.0481 |
| LOC645986 | 0.8772 | 1.0543 | 1.1196 | 0.9021 | 0.9883 | 0.0587 |
| LOC642904 | 0.9489 | 1.0759 | 1.0674 | 0.8611 | 0.9883 | 0.0514 |
| FAM154B   | 0.9381 | 1.1053 | 1.0381 | 0.8718 | 0.9883 | 0.0519 |
| SIGLEC7   | 0.9436 | 1.0812 | 0.9972 | 0.9313 | 0.9883 | 0.0341 |
| LOC647946 | 0.9682 | 1.0866 | 1.0408 | 0.8577 | 0.9883 | 0.0499 |
| GPR179    | 0.8877 | 1.2020 | 1.0293 | 0.8344 | 0.9883 | 0.0822 |
| LOC440748 | 0.8792 | 1.1944 | 1.0232 | 0.8565 | 0.9883 | 0.0780 |
| TM4SF5    | 1.0199 | 0.9841 | 1.0152 | 0.9342 | 0.9883 | 0.0197 |
| LOC646360 | 0.9779 | 1.1301 | 1.0297 | 0.8157 | 0.9883 | 0.0657 |
| LOC401137 | 0.9845 | 1.1153 | 0.9534 | 0.9002 | 0.9884 | 0.0458 |
| ZFPM2     | 0.9533 | 1.1068 | 0.9652 | 0.9282 | 0.9884 | 0.0402 |
| DLX3      | 0.8825 | 1.1970 | 0.9380 | 0.9360 | 0.9884 | 0.0707 |
| LOC644883 | 0.9383 | 1.1027 | 1.0337 | 0.8787 | 0.9884 | 0.0497 |
| EVX2      | 1.0148 | 1.1103 | 0.9700 | 0.8585 | 0.9884 | 0.0523 |
| BRDG1     | 0.9274 | 1.0119 | 1.0070 | 1.0071 | 0.9884 | 0.0203 |
| LOC154761 | 0.8874 | 1.1561 | 1.0034 | 0.9066 | 0.9884 | 0.0614 |
| SNCG      | 0.9516 | 1.0601 | 1.0253 | 0.9165 | 0.9884 | 0.0330 |
| LOC387873 | 1.0192 | 1.0132 | 1.0581 | 0.8630 | 0.9884 | 0.0430 |
| LOC728047 | 0.9049 | 1.0771 | 1.0667 | 0.9048 | 0.9884 | 0.0483 |
| MFSD9     | 0.9664 | 1.0851 | 1.0069 | 0.8953 | 0.9884 | 0.0396 |
| TTL6      | 0.8572 | 1.2029 | 1.0968 | 0.7967 | 0.9884 | 0.0965 |

|            |        |        |        |        |        |        |
|------------|--------|--------|--------|--------|--------|--------|
| IL3RA      | 1.0601 | 1.0053 | 1.0070 | 0.8812 | 0.9884 | 0.0379 |
| LOC283887  | 0.8997 | 1.0987 | 0.9962 | 0.9591 | 0.9884 | 0.0418 |
| TMEM205    | 0.7811 | 1.4726 | 1.0043 | 0.6957 | 0.9884 | 0.1740 |
| ZNF132     | 0.8833 | 1.1674 | 1.0890 | 0.8140 | 0.9884 | 0.0835 |
| DNAHL1     | 0.9242 | 1.0757 | 0.9813 | 0.9724 | 0.9884 | 0.0317 |
| C2CD4D     | 0.9732 | 1.1098 | 0.9950 | 0.8758 | 0.9884 | 0.0480 |
| NCF1C      | 0.8366 | 1.1959 | 1.0073 | 0.9139 | 0.9884 | 0.0774 |
| SHOX2      | 0.9179 | 1.1599 | 1.0120 | 0.8639 | 0.9884 | 0.0648 |
| HIC1       | 0.8947 | 0.9352 | 1.1684 | 0.9555 | 0.9884 | 0.0613 |
| LOC1001323 | 0.9279 | 1.0146 | 1.0379 | 0.9734 | 0.9884 | 0.0242 |
| PAPPA      | 1.0049 | 1.0508 | 1.0456 | 0.8524 | 0.9884 | 0.0465 |
| UBE2K      | 0.9295 | 1.1364 | 0.9977 | 0.8901 | 0.9884 | 0.0541 |
| FAM76A     | 0.9436 | 1.0776 | 1.0940 | 0.8387 | 0.9884 | 0.0602 |
| BSX        | 0.9930 | 1.0676 | 0.9289 | 0.9643 | 0.9884 | 0.0294 |
| LOC442132  | 0.9270 | 0.9959 | 1.1872 | 0.8437 | 0.9884 | 0.0732 |
| ZNF66      | 0.9601 | 1.0457 | 1.0438 | 0.9042 | 0.9884 | 0.0345 |
| PER1       | 1.0506 | 1.0525 | 1.0205 | 0.8302 | 0.9885 | 0.0533 |
| LOC401268  | 0.9427 | 1.1092 | 0.9639 | 0.9380 | 0.9885 | 0.0406 |
| MIR1197    | 0.8953 | 1.1037 | 1.0495 | 0.9054 | 0.9885 | 0.0521 |
| LOC649160  | 0.9173 | 1.0630 | 1.0109 | 0.9627 | 0.9885 | 0.0313 |
| SNORD54    | 0.9571 | 1.1009 | 0.9990 | 0.8968 | 0.9885 | 0.0430 |
| LOC644558  | 0.9212 | 1.0067 | 1.1474 | 0.8786 | 0.9885 | 0.0593 |
| LOC642348  | 0.8573 | 1.0817 | 1.0916 | 0.9233 | 0.9885 | 0.0583 |
| LOC646871  | 1.0619 | 1.0614 | 0.9172 | 0.9135 | 0.9885 | 0.0422 |
| FAM90A11P  | 1.0632 | 1.0123 | 1.0117 | 0.8668 | 0.9885 | 0.0423 |
| PRPH       | 0.9996 | 1.1253 | 0.9882 | 0.8408 | 0.9885 | 0.0582 |
| C4orf15    | 0.9011 | 1.1004 | 1.0102 | 0.9422 | 0.9885 | 0.0436 |
| LOC646110  | 0.9456 | 1.1467 | 1.0182 | 0.8434 | 0.9885 | 0.0638 |
| LRRC37A3   | 0.9754 | 1.0579 | 1.0301 | 0.8906 | 0.9885 | 0.0369 |
| FAM81B     | 1.0225 | 1.0959 | 0.9539 | 0.8816 | 0.9885 | 0.0459 |
| LOC649707  | 0.9855 | 1.0979 | 0.9410 | 0.9296 | 0.9885 | 0.0384 |
| CACNG8     | 0.8797 | 1.0818 | 1.0547 | 0.9378 | 0.9885 | 0.0479 |
| KRTAP10-7  | 1.0128 | 0.9946 | 0.9942 | 0.9524 | 0.9885 | 0.0128 |
| HSPB9      | 0.9308 | 1.1088 | 1.0275 | 0.8869 | 0.9885 | 0.0497 |
| FLJ30594   | 0.9638 | 1.0845 | 1.0297 | 0.8759 | 0.9885 | 0.0449 |
| CCDC62     | 0.9246 | 1.1104 | 1.0101 | 0.9089 | 0.9885 | 0.0463 |
| LOC645932  | 0.9150 | 1.0928 | 1.0272 | 0.9190 | 0.9885 | 0.0434 |
| VENTXP7    | 0.9821 | 1.0930 | 0.9930 | 0.8860 | 0.9885 | 0.0423 |
| FAM75A6    | 0.9766 | 1.0908 | 1.0072 | 0.8795 | 0.9885 | 0.0436 |
| LOC1001330 | 0.9790 | 1.0737 | 0.9719 | 0.9295 | 0.9885 | 0.0304 |
| OR51B6     | 0.9303 | 1.0753 | 1.0376 | 0.9108 | 0.9885 | 0.0402 |
| MYOC       | 0.9192 | 1.1463 | 0.9485 | 0.9402 | 0.9885 | 0.0529 |
| LOC1001290 | 0.9357 | 1.0519 | 0.9896 | 0.9769 | 0.9885 | 0.0240 |
| KIAA0363   | 0.9175 | 1.0453 | 1.0562 | 0.9352 | 0.9885 | 0.0362 |
| C1orf213   | 0.9332 | 1.1273 | 1.0093 | 0.8844 | 0.9885 | 0.0529 |
| PKD1L1     | 0.9314 | 1.1097 | 1.0222 | 0.8909 | 0.9886 | 0.0488 |

|            |        |        |        |        |        |        |
|------------|--------|--------|--------|--------|--------|--------|
| XIAP       | 0.9584 | 1.1160 | 0.9639 | 0.9159 | 0.9886 | 0.0438 |
| WIT1       | 0.9240 | 1.0590 | 1.0514 | 0.9198 | 0.9886 | 0.0385 |
| LOC649752  | 0.9953 | 1.0920 | 0.9784 | 0.8886 | 0.9886 | 0.0417 |
| AADACL4    | 0.8404 | 1.0896 | 0.9952 | 1.0291 | 0.9886 | 0.0531 |
| LOC1001315 | 0.9207 | 1.0514 | 1.0262 | 0.9560 | 0.9886 | 0.0303 |
| ZRANB3     | 0.9540 | 1.0985 | 1.0124 | 0.8895 | 0.9886 | 0.0444 |
| LOC1001330 | 1.0097 | 1.1222 | 1.0539 | 0.7686 | 0.9886 | 0.0769 |
| ATG9B      | 0.9314 | 1.0359 | 1.0236 | 0.9636 | 0.9886 | 0.0248 |
| LOC650010  | 0.9381 | 1.1642 | 0.9788 | 0.8733 | 0.9886 | 0.0624 |
| KRTAP15-1  | 0.9417 | 1.0501 | 1.0412 | 0.9213 | 0.9886 | 0.0333 |
| LOC441070  | 1.1202 | 1.0368 | 0.9491 | 0.8484 | 0.9886 | 0.0584 |
| KCNIP2     | 0.8935 | 1.0551 | 1.0467 | 0.9591 | 0.9886 | 0.0384 |
| LOC442204  | 1.0001 | 1.1089 | 0.9509 | 0.8946 | 0.9886 | 0.0455 |
| LOC647234  | 0.9819 | 1.1250 | 0.9587 | 0.8889 | 0.9886 | 0.0496 |
| LOC1001304 | 0.9717 | 1.0583 | 1.1037 | 0.8208 | 0.9886 | 0.0623 |
| LOC643311  | 1.2674 | 0.8742 | 0.8566 | 0.9564 | 0.9886 | 0.0954 |
| LOC642383  | 1.0081 | 0.9787 | 1.0138 | 0.9539 | 0.9886 | 0.0139 |
| LOC1001308 | 0.9729 | 1.1819 | 0.9379 | 0.8618 | 0.9886 | 0.0685 |
| C2CD4A     | 0.9949 | 1.0040 | 1.0444 | 0.9113 | 0.9886 | 0.0279 |
| LOC1001305 | 0.9877 | 1.0974 | 1.0926 | 0.7769 | 0.9886 | 0.0750 |
| DDN        | 0.9278 | 1.0663 | 1.0316 | 0.9289 | 0.9887 | 0.0355 |
| LOC402160  | 0.8560 | 1.1067 | 1.0376 | 0.9543 | 0.9887 | 0.0541 |
| CHRNA1     | 0.9799 | 1.0835 | 1.0033 | 0.8879 | 0.9887 | 0.0402 |
| MGC39584   | 1.0316 | 0.9888 | 0.9996 | 0.9347 | 0.9887 | 0.0202 |
| C17orf76   | 0.8687 | 1.1259 | 0.9954 | 0.9646 | 0.9887 | 0.0531 |
| HEY2       | 0.9499 | 1.1052 | 1.0200 | 0.8796 | 0.9887 | 0.0483 |
| BTNL3      | 0.9608 | 1.0606 | 1.0575 | 0.8758 | 0.9887 | 0.0442 |
| ABCA4      | 0.8881 | 1.1051 | 0.9960 | 0.9655 | 0.9887 | 0.0449 |
| LOC646507  | 0.9618 | 1.0245 | 1.0177 | 0.9508 | 0.9887 | 0.0189 |
| TRAPPC1    | 0.8873 | 1.2814 | 1.0549 | 0.7311 | 0.9887 | 0.1179 |
| LOC730360  | 0.9956 | 1.0198 | 0.9829 | 0.9565 | 0.9887 | 0.0132 |
| FANCA      | 0.9509 | 1.0863 | 1.0039 | 0.9137 | 0.9887 | 0.0374 |
| LOC1001325 | 0.9295 | 1.0102 | 1.0865 | 0.9286 | 0.9887 | 0.0378 |
| LOC388565  | 1.0277 | 0.9911 | 1.0147 | 0.9213 | 0.9887 | 0.0237 |
| MTERFD3    | 0.9422 | 1.1280 | 0.9990 | 0.8857 | 0.9887 | 0.0519 |
| MGC34821   | 0.9128 | 1.0341 | 1.0286 | 0.9793 | 0.9887 | 0.0281 |
| C5orf20    | 0.9368 | 1.1274 | 1.0263 | 0.8643 | 0.9887 | 0.0569 |
| OR5H2      | 0.9154 | 1.0807 | 1.0495 | 0.9093 | 0.9887 | 0.0446 |
| FLJ46836   | 0.8536 | 1.0778 | 1.0486 | 0.9749 | 0.9887 | 0.0500 |
| PURG       | 0.9261 | 1.2158 | 0.9733 | 0.8397 | 0.9887 | 0.0806 |
| TNFAIP8L3  | 1.0140 | 1.1591 | 0.9761 | 0.8058 | 0.9887 | 0.0726 |
| SMR3B      | 1.0207 | 1.0057 | 1.1366 | 0.7920 | 0.9888 | 0.0718 |
| OLR1       | 0.9727 | 1.0852 | 0.9967 | 0.9005 | 0.9888 | 0.0381 |
| HDAC11     | 0.9234 | 1.3294 | 0.9409 | 0.7613 | 0.9888 | 0.1205 |
| PCDH8      | 0.8817 | 1.0709 | 1.0793 | 0.9232 | 0.9888 | 0.0506 |
| DUSP14     | 0.6818 | 1.4903 | 1.0371 | 0.7459 | 0.9888 | 0.1842 |

|            |        |        |        |        |        |        |
|------------|--------|--------|--------|--------|--------|--------|
| LOC645088  | 0.9379 | 1.0887 | 1.0004 | 0.9281 | 0.9888 | 0.0370 |
| GNRH2      | 0.9471 | 1.0225 | 1.0272 | 0.9584 | 0.9888 | 0.0210 |
| LOC1001280 | 0.8921 | 1.0296 | 1.0127 | 1.0207 | 0.9888 | 0.0324 |
| LASS6      | 1.0813 | 1.2834 | 0.9434 | 0.6470 | 0.9888 | 0.1336 |
| XPA        | 0.9505 | 1.1273 | 1.1484 | 0.7289 | 0.9888 | 0.0973 |
| EIF2S1     | 1.0358 | 1.1547 | 1.0267 | 0.7379 | 0.9888 | 0.0886 |
| LOC647748  | 0.9579 | 1.1046 | 0.9629 | 0.9298 | 0.9888 | 0.0393 |
| TTY8B      | 0.9667 | 1.0567 | 1.0384 | 0.8934 | 0.9888 | 0.0373 |
| MADCAM1    | 0.9471 | 0.9842 | 0.9716 | 1.0523 | 0.9888 | 0.0225 |
| PROX2      | 0.9445 | 1.0470 | 1.0532 | 0.9105 | 0.9888 | 0.0361 |
| FCER1G     | 0.9287 | 1.0723 | 1.0776 | 0.8767 | 0.9888 | 0.0509 |
| ST8SIA5    | 0.9734 | 1.0334 | 0.9699 | 0.9786 | 0.9888 | 0.0150 |
| LOC1001314 | 0.9918 | 0.9760 | 1.0849 | 0.9026 | 0.9888 | 0.0374 |
| KIAA1772   | 0.9340 | 0.9870 | 0.9786 | 1.0557 | 0.9888 | 0.0251 |
| LOC646708  | 0.8524 | 1.1651 | 1.0480 | 0.8898 | 0.9888 | 0.0725 |
| STAP1      | 1.0298 | 0.9396 | 1.0580 | 0.9280 | 0.9888 | 0.0324 |
| TSNARE1    | 0.9666 | 1.0786 | 1.0204 | 0.8897 | 0.9888 | 0.0402 |
| ARG1       | 0.8881 | 1.0356 | 1.1432 | 0.8884 | 0.9888 | 0.0621 |
| LOC256880  | 0.9237 | 1.0804 | 1.0280 | 0.9232 | 0.9888 | 0.0392 |
| LOC400891  | 1.0344 | 1.0446 | 1.0140 | 0.8624 | 0.9888 | 0.0426 |
| PWP2       | 0.8223 | 1.0899 | 1.0814 | 0.9618 | 0.9888 | 0.0627 |
| LOC1001315 | 0.9302 | 1.1639 | 0.9840 | 0.8772 | 0.9888 | 0.0623 |
| MIR603     | 0.9653 | 1.0926 | 0.9674 | 0.9301 | 0.9888 | 0.0356 |
| LOC1001327 | 0.9867 | 0.9427 | 1.1521 | 0.8739 | 0.9888 | 0.0591 |
| GLDN       | 1.0371 | 1.0681 | 0.9568 | 0.8933 | 0.9888 | 0.0395 |
| LOC730684  | 1.0622 | 1.0176 | 0.9756 | 0.9001 | 0.9888 | 0.0345 |
| LOC1001344 | 0.9821 | 0.9438 | 1.0626 | 0.9669 | 0.9888 | 0.0258 |
| FAM47A     | 0.9932 | 1.0666 | 1.0039 | 0.8917 | 0.9889 | 0.0362 |
| SYTL5      | 0.8744 | 1.2401 | 0.9613 | 0.8796 | 0.9889 | 0.0861 |
| FAM57B     | 0.8117 | 1.1010 | 1.0201 | 1.0226 | 0.9889 | 0.0620 |
| LOC653676  | 0.9088 | 1.0643 | 1.0220 | 0.9604 | 0.9889 | 0.0342 |
| LOC441551  | 1.0105 | 1.0125 | 0.9527 | 0.9798 | 0.9889 | 0.0142 |
| ERCC-00059 | 0.9389 | 1.0002 | 1.0885 | 0.9279 | 0.9889 | 0.0368 |
| LOC646470  | 1.0119 | 1.0494 | 0.9997 | 0.8944 | 0.9889 | 0.0332 |
| C4orf35    | 0.8786 | 1.0815 | 1.0984 | 0.8969 | 0.9889 | 0.0586 |
| TTY8       | 0.9357 | 1.0837 | 0.9823 | 0.9538 | 0.9889 | 0.0330 |
| TNS1       | 0.9084 | 1.1019 | 0.9270 | 1.0183 | 0.9889 | 0.0447 |
| LOC647868  | 0.9253 | 1.0447 | 1.0134 | 0.9721 | 0.9889 | 0.0259 |
| LOC400581  | 0.9332 | 1.1395 | 1.0356 | 0.8472 | 0.9889 | 0.0633 |
| LOC653088  | 0.9855 | 1.0518 | 1.0800 | 0.8383 | 0.9889 | 0.0540 |
| LOC728528  | 0.9979 | 1.1177 | 0.9573 | 0.8827 | 0.9889 | 0.0491 |
| ZNF484     | 0.8780 | 1.2936 | 0.7963 | 0.9876 | 0.9889 | 0.1089 |
| HEATR7B2   | 0.9599 | 1.0044 | 1.0703 | 0.9211 | 0.9889 | 0.0320 |
| METTL12    | 0.9101 | 1.2072 | 1.0306 | 0.8078 | 0.9889 | 0.0858 |
| ERCC-00095 | 0.8892 | 1.0481 | 1.0378 | 0.9808 | 0.9889 | 0.0364 |
| MMP20      | 0.9619 | 1.0792 | 1.0056 | 0.9091 | 0.9890 | 0.0360 |

|             |        |        |        |        |        |        |
|-------------|--------|--------|--------|--------|--------|--------|
| ADCY2       | 0.8585 | 1.1132 | 1.0692 | 0.9150 | 0.9890 | 0.0608 |
| GDF5OS      | 0.9279 | 1.0540 | 1.0570 | 0.9170 | 0.9890 | 0.0385 |
| DLK2        | 0.9050 | 1.1276 | 1.0343 | 0.8889 | 0.9890 | 0.0565 |
| LOC1001347  | 0.9376 | 1.0893 | 0.9675 | 0.9614 | 0.9890 | 0.0341 |
| LOC595101   | 0.9326 | 1.0061 | 0.9895 | 1.0276 | 0.9890 | 0.0203 |
| LOC388242   | 0.9341 | 1.1268 | 1.0284 | 0.8665 | 0.9890 | 0.0567 |
| LOC442020   | 0.7794 | 1.1367 | 1.0635 | 0.9763 | 0.9890 | 0.0772 |
| TM4SF4      | 0.9608 | 1.0364 | 0.9974 | 0.9613 | 0.9890 | 0.0180 |
| LOC1001280  | 0.9486 | 1.0539 | 1.1129 | 0.8406 | 0.9890 | 0.0600 |
| PPP1R15B    | 0.9797 | 1.0786 | 0.9894 | 0.9082 | 0.9890 | 0.0349 |
| CDKL2       | 0.9197 | 1.1010 | 1.0164 | 0.9188 | 0.9890 | 0.0438 |
| CCDC35      | 0.8300 | 1.1460 | 0.9751 | 1.0049 | 0.9890 | 0.0648 |
| ARHGAP21    | 0.9188 | 1.3280 | 0.9360 | 0.7733 | 0.9890 | 0.1188 |
| MYO1G       | 1.0048 | 1.1976 | 0.9368 | 0.8168 | 0.9890 | 0.0797 |
| FAM12B      | 0.9927 | 1.1039 | 1.0095 | 0.8498 | 0.9890 | 0.0525 |
| MIR573      | 1.0066 | 1.0652 | 0.9907 | 0.8936 | 0.9890 | 0.0356 |
| NCRNA001115 | 0.8009 | 1.1254 | 1.0554 | 0.9744 | 0.9890 | 0.0699 |
| KRTAP5-6    | 1.1175 | 0.9584 | 1.0107 | 0.8694 | 0.9890 | 0.0518 |
| AACSL       | 0.9636 | 1.1319 | 1.0287 | 0.8319 | 0.9890 | 0.0628 |
| RHCE        | 0.9452 | 1.0946 | 1.0029 | 0.9133 | 0.9890 | 0.0398 |
| GRASP       | 0.8729 | 1.1316 | 0.9678 | 0.9838 | 0.9890 | 0.0535 |
| LOC1001344  | 1.0246 | 1.0261 | 1.0093 | 0.8962 | 0.9890 | 0.0312 |
| BBS7        | 0.9093 | 1.2790 | 1.0343 | 0.7335 | 0.9890 | 0.1147 |
| LOC730804   | 1.0037 | 1.0351 | 1.0136 | 0.9038 | 0.9890 | 0.0292 |
| CATSPERB    | 0.9973 | 1.0506 | 0.9834 | 0.9249 | 0.9890 | 0.0258 |
| DNHD2       | 0.9973 | 1.0608 | 0.9464 | 0.9517 | 0.9891 | 0.0265 |
| MIR33B      | 0.9688 | 1.1275 | 1.0049 | 0.8550 | 0.9891 | 0.0561 |
| PPP1R3B     | 0.9874 | 1.0432 | 1.0650 | 0.8606 | 0.9891 | 0.0458 |
| ELA3A       | 0.9823 | 1.0955 | 0.9824 | 0.8960 | 0.9891 | 0.0409 |
| POU3F2      | 0.9935 | 1.0811 | 0.9396 | 0.9421 | 0.9891 | 0.0331 |
| LOC652661   | 0.8626 | 1.1868 | 0.9844 | 0.9225 | 0.9891 | 0.0704 |
| MIR630      | 1.0624 | 1.0542 | 0.9991 | 0.8406 | 0.9891 | 0.0514 |
| FLJ35740    | 0.8825 | 1.1052 | 0.9964 | 0.9720 | 0.9891 | 0.0458 |
| DBX2        | 0.9765 | 1.1638 | 0.9362 | 0.8798 | 0.9891 | 0.0615 |
| RASGEF1C    | 0.9103 | 1.1066 | 1.0801 | 0.8592 | 0.9891 | 0.0614 |
| C14orf148   | 0.9810 | 1.0830 | 1.0165 | 0.8759 | 0.9891 | 0.0432 |
| FAM188B     | 0.7638 | 1.2016 | 1.0879 | 0.9031 | 0.9891 | 0.0970 |
| BMP2        | 0.9943 | 1.0821 | 1.0107 | 0.8693 | 0.9891 | 0.0443 |
| ZNF648      | 0.8515 | 1.2120 | 1.0330 | 0.8600 | 0.9891 | 0.0852 |
| LOC152578   | 1.0592 | 1.0156 | 1.0125 | 0.8692 | 0.9891 | 0.0414 |
| HFM1        | 0.9715 | 1.1030 | 0.9629 | 0.9191 | 0.9891 | 0.0397 |
| RSPO2       | 0.9303 | 1.1735 | 0.9551 | 0.8976 | 0.9891 | 0.0626 |
| LOC643445   | 0.9871 | 1.0705 | 1.0242 | 0.8747 | 0.9891 | 0.0418 |
| LOC1001322  | 0.9615 | 1.0301 | 1.0084 | 0.9566 | 0.9891 | 0.0179 |
| GRINL1A     | 0.9159 | 1.2086 | 0.9869 | 0.8452 | 0.9891 | 0.0787 |
| C14orf39    | 0.8945 | 1.1564 | 0.9746 | 0.9311 | 0.9892 | 0.0581 |

|            |        |        |        |        |        |        |
|------------|--------|--------|--------|--------|--------|--------|
| LOC1001278 | 1.0050 | 1.0891 | 0.9546 | 0.9079 | 0.9892 | 0.0388 |
| ACCN1      | 0.9644 | 1.0159 | 1.0209 | 0.9554 | 0.9892 | 0.0170 |
| LOC652775  | 0.9593 | 1.1386 | 1.0055 | 0.8532 | 0.9892 | 0.0591 |
| PLA2G4B    | 0.9349 | 1.3086 | 0.8796 | 0.8336 | 0.9892 | 0.1085 |
| C3orf32    | 1.0117 | 1.0749 | 0.9352 | 0.9349 | 0.9892 | 0.0338 |
| FLJ10996   | 0.8863 | 1.1281 | 1.0691 | 0.8732 | 0.9892 | 0.0644 |
| LOC1001282 | 0.8907 | 1.0939 | 1.0462 | 0.9260 | 0.9892 | 0.0482 |
| LOC441762  | 1.0410 | 1.0025 | 0.9501 | 0.9631 | 0.9892 | 0.0206 |
| DACH1      | 0.9100 | 1.0719 | 1.0058 | 0.9689 | 0.9892 | 0.0339 |
| LOC1001318 | 0.9168 | 1.1173 | 1.0255 | 0.8971 | 0.9892 | 0.0512 |
| LOC653158  | 1.0296 | 1.1882 | 0.9202 | 0.8188 | 0.9892 | 0.0791 |
| LOC1001327 | 0.9249 | 1.1064 | 1.0641 | 0.8613 | 0.9892 | 0.0576 |
| MIR1272    | 0.9509 | 1.0259 | 1.0635 | 0.9164 | 0.9892 | 0.0337 |
| LOC654092  | 1.0439 | 1.0103 | 1.0344 | 0.8683 | 0.9892 | 0.0409 |
| GAPDHS     | 0.9832 | 0.9960 | 1.0478 | 0.9297 | 0.9892 | 0.0242 |
| SLC16A1    | 0.8500 | 1.1803 | 0.9721 | 0.9544 | 0.9892 | 0.0692 |
| LOC645797  | 0.9502 | 0.9887 | 1.0229 | 0.9950 | 0.9892 | 0.0150 |
| ABCF3      | 0.9737 | 1.2447 | 0.9398 | 0.7987 | 0.9892 | 0.0932 |
| LOC1001307 | 0.8270 | 1.1598 | 1.0977 | 0.8724 | 0.9892 | 0.0821 |
| LOC1001319 | 0.8700 | 1.0990 | 1.0148 | 0.9730 | 0.9892 | 0.0476 |
| FLJ42258   | 0.9278 | 1.1052 | 0.9737 | 0.9502 | 0.9892 | 0.0398 |
| FRG1B      | 1.0077 | 1.0449 | 1.0413 | 0.8630 | 0.9892 | 0.0429 |
| OR4M1      | 0.9457 | 1.0842 | 1.0031 | 0.9239 | 0.9892 | 0.0358 |
| KCNA6      | 0.9292 | 1.1351 | 0.9559 | 0.9367 | 0.9892 | 0.0490 |
| MIR636     | 0.9912 | 1.0561 | 1.0632 | 0.8465 | 0.9892 | 0.0503 |
| AKR1C1     | 0.8847 | 1.1558 | 1.0627 | 0.8537 | 0.9892 | 0.0721 |
| LOC652448  | 0.9193 | 1.0799 | 1.0244 | 0.9334 | 0.9892 | 0.0381 |
| IL1A       | 0.9229 | 1.0238 | 1.0431 | 0.9671 | 0.9892 | 0.0274 |
| TRAPPC2    | 0.9505 | 1.1194 | 1.0752 | 0.8119 | 0.9892 | 0.0691 |
| OR2A20P    | 0.9174 | 1.1076 | 1.0110 | 0.9210 | 0.9892 | 0.0450 |
| LOC1001345 | 0.8603 | 1.1544 | 0.9602 | 0.9821 | 0.9892 | 0.0611 |
| LOC1001283 | 0.9120 | 0.9988 | 1.0843 | 0.9620 | 0.9893 | 0.0363 |
| NPCDR1     | 0.8596 | 1.1789 | 0.9782 | 0.9404 | 0.9893 | 0.0679 |
| DPF3       | 0.9543 | 1.0626 | 1.0623 | 0.8779 | 0.9893 | 0.0450 |
| PATE1      | 0.8743 | 1.1000 | 1.0616 | 0.9211 | 0.9893 | 0.0543 |
| LOC653050  | 0.9504 | 1.1052 | 0.9820 | 0.9194 | 0.9893 | 0.0407 |
| MED12      | 0.8539 | 1.1394 | 0.9579 | 1.0059 | 0.9893 | 0.0592 |
| OSTbeta    | 0.9758 | 1.0585 | 0.9482 | 0.9746 | 0.9893 | 0.0239 |
| LOC653886  | 0.8923 | 0.9997 | 1.1689 | 0.8962 | 0.9893 | 0.0648 |
| LOC645441  | 1.0386 | 1.0544 | 0.9963 | 0.8679 | 0.9893 | 0.0423 |
| LOC646700  | 0.9380 | 1.1791 | 0.9651 | 0.8749 | 0.9893 | 0.0660 |
| Gcom1      | 0.9485 | 1.0478 | 1.0437 | 0.9171 | 0.9893 | 0.0332 |
| C14orf73   | 0.9057 | 1.0544 | 1.0178 | 0.9792 | 0.9893 | 0.0318 |
| C11orf21   | 1.0213 | 1.0155 | 1.1278 | 0.7926 | 0.9893 | 0.0704 |
| LOC642608  | 0.8706 | 1.1064 | 1.1517 | 0.8285 | 0.9893 | 0.0817 |
| PCDHA12    | 0.9542 | 1.0921 | 1.0419 | 0.8690 | 0.9893 | 0.0492 |

|            |        |        |        |        |        |        |
|------------|--------|--------|--------|--------|--------|--------|
| FABP3      | 0.9276 | 1.0458 | 1.0551 | 0.9288 | 0.9893 | 0.0353 |
| LOC644006  | 0.8978 | 1.0605 | 1.0781 | 0.9208 | 0.9893 | 0.0466 |
| ERCC-00085 | 0.9300 | 1.0252 | 1.0369 | 0.9652 | 0.9893 | 0.0253 |
| C20orf123  | 0.9707 | 1.1982 | 0.8413 | 0.9471 | 0.9893 | 0.0751 |
| LOC1001294 | 0.8672 | 1.2316 | 0.9572 | 0.9013 | 0.9893 | 0.0829 |
| LOC392188  | 1.0366 | 0.8812 | 1.0992 | 0.9402 | 0.9893 | 0.0487 |
| LOC283514  | 0.8847 | 1.3096 | 0.9193 | 0.8437 | 0.9893 | 0.1079 |
| SNORD97    | 0.8986 | 1.0704 | 1.0433 | 0.9450 | 0.9893 | 0.0405 |
| KIR2DS5    | 0.8981 | 1.0147 | 1.0420 | 1.0025 | 0.9893 | 0.0315 |
| CDY1       | 0.9436 | 1.0917 | 0.9957 | 0.9264 | 0.9893 | 0.0372 |
| TTC19      | 0.9239 | 1.4396 | 0.9977 | 0.5962 | 0.9893 | 0.1736 |
| LOC387761  | 0.9076 | 1.1410 | 1.0616 | 0.8472 | 0.9893 | 0.0678 |
| SLC22A2    | 0.9214 | 1.1212 | 0.9929 | 0.9218 | 0.9894 | 0.0471 |
| LOC653129  | 0.9911 | 1.0981 | 1.0328 | 0.8354 | 0.9894 | 0.0558 |
| LOC340527  | 0.8991 | 1.1026 | 1.0361 | 0.9197 | 0.9894 | 0.0483 |
| LOC654069  | 0.9244 | 1.2199 | 0.9282 | 0.8848 | 0.9894 | 0.0775 |
| LOC646320  | 0.8833 | 1.0795 | 1.0722 | 0.9225 | 0.9894 | 0.0506 |
| KRT23      | 1.0255 | 0.9622 | 1.0418 | 0.9279 | 0.9894 | 0.0267 |
| LOC645790  | 0.9933 | 1.0360 | 1.0976 | 0.8305 | 0.9894 | 0.0571 |
| RASA2      | 0.9151 | 1.0672 | 1.0033 | 0.9718 | 0.9894 | 0.0317 |
| GRIPAP1    | 0.7770 | 1.2426 | 1.0515 | 0.8864 | 0.9894 | 0.1015 |
| BHMT       | 0.9184 | 1.0564 | 1.0660 | 0.9168 | 0.9894 | 0.0415 |
| PAGE4      | 0.9416 | 1.0439 | 1.0604 | 0.9116 | 0.9894 | 0.0369 |
| PHYHIPL    | 0.9434 | 1.0897 | 0.9788 | 0.9457 | 0.9894 | 0.0344 |
| LOC1001292 | 0.9237 | 1.1008 | 1.1085 | 0.8245 | 0.9894 | 0.0696 |
| LOC652479  | 0.9866 | 1.0561 | 1.0072 | 0.9077 | 0.9894 | 0.0309 |
| C3orf48    | 0.9188 | 1.0749 | 0.9877 | 0.9763 | 0.9894 | 0.0322 |
| LOC347544  | 0.7253 | 1.4976 | 1.0277 | 0.7070 | 0.9894 | 0.1847 |
| KRTAP22-2  | 0.9615 | 1.0438 | 1.0178 | 0.9346 | 0.9894 | 0.0251 |
| FGD4       | 0.9003 | 1.1617 | 1.0175 | 0.8781 | 0.9894 | 0.0651 |
| ERCC-00130 | 0.9667 | 1.0823 | 1.0399 | 0.8689 | 0.9894 | 0.0467 |
| RPL37      | 0.9507 | 1.1327 | 0.9377 | 0.9367 | 0.9894 | 0.0479 |
| LOC441799  | 1.0004 | 0.9871 | 1.0368 | 0.9335 | 0.9894 | 0.0214 |
| LOC338963  | 0.9125 | 1.2056 | 1.0590 | 0.7806 | 0.9894 | 0.0918 |
| LCE3C      | 0.9336 | 1.1625 | 0.9897 | 0.8718 | 0.9894 | 0.0625 |
| LOC1001344 | 0.9007 | 1.1649 | 0.9560 | 0.9362 | 0.9894 | 0.0596 |
| RNASE3     | 0.9892 | 1.0578 | 1.0057 | 0.9052 | 0.9895 | 0.0317 |
| PGM2       | 0.7368 | 1.4329 | 1.0000 | 0.7881 | 0.9895 | 0.1584 |
| HS2ST1     | 0.8776 | 1.2093 | 0.9896 | 0.8813 | 0.9895 | 0.0777 |
| HOXC10     | 0.9282 | 1.0398 | 1.0985 | 0.8914 | 0.9895 | 0.0481 |
| ALLC       | 0.9452 | 1.0465 | 1.0402 | 0.9260 | 0.9895 | 0.0314 |
| LOC651112  | 0.8997 | 1.1003 | 1.0828 | 0.8751 | 0.9895 | 0.0593 |
| LOC648220  | 0.9714 | 1.0530 | 0.9747 | 0.9588 | 0.9895 | 0.0214 |
| LOC400403  | 0.9280 | 1.1054 | 0.9984 | 0.9261 | 0.9895 | 0.0421 |
| HBA1       | 0.9857 | 0.9945 | 1.0559 | 0.9218 | 0.9895 | 0.0274 |
| CD1D       | 0.9219 | 1.0611 | 1.0262 | 0.9488 | 0.9895 | 0.0325 |



|            |        |        |        |        |        |        |
|------------|--------|--------|--------|--------|--------|--------|
| CAPN3      | 0.9546 | 1.0762 | 1.0010 | 0.9262 | 0.9895 | 0.0328 |
| LOC1001302 | 0.9826 | 1.0994 | 1.0456 | 0.8304 | 0.9895 | 0.0581 |
| NDUFA11    | 0.8458 | 1.4515 | 0.9611 | 0.6997 | 0.9895 | 0.1630 |
| MAPK7      | 1.0143 | 1.1595 | 0.9744 | 0.8098 | 0.9895 | 0.0719 |
| SPAG11A    | 0.9638 | 1.0683 | 1.0248 | 0.9013 | 0.9895 | 0.0364 |
| SIRT6      | 1.1084 | 1.1041 | 0.9918 | 0.7539 | 0.9895 | 0.0831 |
| LOC1001316 | 0.8931 | 1.0741 | 1.0171 | 0.9738 | 0.9895 | 0.0381 |
| CAV2       | 0.9298 | 1.1396 | 0.9820 | 0.9068 | 0.9895 | 0.0524 |
| WTIP       | 0.9509 | 1.1012 | 1.0315 | 0.8746 | 0.9895 | 0.0491 |
| UACA       | 0.9507 | 1.1772 | 0.9631 | 0.8671 | 0.9895 | 0.0661 |
| ATF7       | 0.9250 | 1.0819 | 1.0385 | 0.9128 | 0.9895 | 0.0418 |
| LOC644047  | 0.9289 | 1.0898 | 1.0161 | 0.9234 | 0.9895 | 0.0396 |
| HAS2AS     | 0.9178 | 1.1881 | 0.9678 | 0.8844 | 0.9895 | 0.0684 |
| BMPR2      | 0.9783 | 1.2004 | 1.0495 | 0.7300 | 0.9895 | 0.0981 |
| LOC1001315 | 0.9339 | 1.0666 | 1.0407 | 0.9171 | 0.9896 | 0.0375 |
| CPA5       | 0.9898 | 1.0550 | 1.0096 | 0.9037 | 0.9896 | 0.0317 |
| ANXA6      | 0.8855 | 1.2440 | 0.9841 | 0.8447 | 0.9896 | 0.0897 |
| LOC643927  | 1.0326 | 1.0663 | 0.9465 | 0.9129 | 0.9896 | 0.0359 |
| LOC730839  | 0.9406 | 1.0877 | 1.0339 | 0.8961 | 0.9896 | 0.0435 |
| CORO7      | 1.0521 | 0.9293 | 1.1268 | 0.8501 | 0.9896 | 0.0618 |
| LOC439951  | 1.0190 | 1.0729 | 0.9755 | 0.8909 | 0.9896 | 0.0384 |
| LOC729870  | 1.0069 | 1.0791 | 1.0312 | 0.8410 | 0.9896 | 0.0517 |
| MSRB3      | 0.9548 | 1.0860 | 1.0160 | 0.9015 | 0.9896 | 0.0397 |
| LOC1001301 | 0.9845 | 1.0500 | 1.0568 | 0.8670 | 0.9896 | 0.0440 |
| LOC389151  | 0.9209 | 1.0968 | 0.9808 | 0.9598 | 0.9896 | 0.0378 |
| SEMA5A     | 0.9712 | 1.0410 | 1.0735 | 0.8726 | 0.9896 | 0.0444 |
| CXADRP3    | 0.9774 | 1.2168 | 0.9123 | 0.8519 | 0.9896 | 0.0800 |
| GCK        | 0.9281 | 1.0575 | 1.0766 | 0.8963 | 0.9896 | 0.0454 |
| LOC650433  | 0.9152 | 1.1886 | 0.9976 | 0.8570 | 0.9896 | 0.0723 |
| OR8K5      | 1.0236 | 1.0048 | 1.0978 | 0.8323 | 0.9896 | 0.0562 |
| ZNF513     | 1.0349 | 1.1770 | 0.9856 | 0.7610 | 0.9896 | 0.0863 |
| LOC643647  | 0.8906 | 1.1553 | 1.0571 | 0.8555 | 0.9896 | 0.0706 |
| LOC730826  | 0.9125 | 1.1461 | 1.0159 | 0.8839 | 0.9896 | 0.0594 |
| HAR1B      | 0.8813 | 1.1170 | 1.0250 | 0.9351 | 0.9896 | 0.0518 |
| SDS        | 0.9825 | 1.1392 | 0.9841 | 0.8527 | 0.9896 | 0.0586 |
| MIR1-1     | 0.9803 | 1.0922 | 0.9343 | 0.9518 | 0.9896 | 0.0355 |
| LOC441682  | 0.9549 | 1.1040 | 1.0172 | 0.8826 | 0.9896 | 0.0470 |
| LOC647343  | 1.0004 | 1.0042 | 0.9874 | 0.9665 | 0.9896 | 0.0085 |
| MGC39821   | 0.9693 | 0.9966 | 1.0827 | 0.9100 | 0.9897 | 0.0359 |
| NR2E1      | 0.8482 | 1.1701 | 1.0930 | 0.8474 | 0.9897 | 0.0834 |
| FAM173B    | 0.8710 | 1.3743 | 0.9605 | 0.7528 | 0.9897 | 0.1351 |
| LOC646754  | 0.9279 | 1.1152 | 1.0563 | 0.8592 | 0.9897 | 0.0585 |
| LOC390858  | 0.9329 | 1.0417 | 1.0599 | 0.9242 | 0.9897 | 0.0355 |
| LOC728897  | 0.9294 | 1.0249 | 1.0049 | 0.9995 | 0.9897 | 0.0208 |
| LOC728219  | 0.9464 | 1.1599 | 0.9993 | 0.8530 | 0.9897 | 0.0643 |
| MAGEC2     | 0.9654 | 1.1037 | 1.0591 | 0.8305 | 0.9897 | 0.0604 |

|            |        |        |        |        |        |        |
|------------|--------|--------|--------|--------|--------|--------|
| C21orf67   | 0.8766 | 1.1677 | 0.9700 | 0.9443 | 0.9897 | 0.0625 |
| LOC1001311 | 0.9637 | 1.0597 | 0.9994 | 0.9359 | 0.9897 | 0.0267 |
| UPP2       | 1.0136 | 1.1257 | 0.9863 | 0.8332 | 0.9897 | 0.0603 |
| LOC643619  | 0.8712 | 1.0368 | 1.1161 | 0.9346 | 0.9897 | 0.0542 |
| SBK2       | 0.9500 | 1.1274 | 0.9651 | 0.9163 | 0.9897 | 0.0470 |
| PAPD5      | 0.8238 | 1.3512 | 0.9896 | 0.7942 | 0.9897 | 0.1279 |
| KLK8       | 0.9622 | 1.0817 | 0.9463 | 0.9685 | 0.9897 | 0.0310 |
| MIR195     | 1.0331 | 1.0305 | 1.0088 | 0.8865 | 0.9897 | 0.0348 |
| ZNF776     | 0.9753 | 1.1800 | 0.9209 | 0.8826 | 0.9897 | 0.0662 |
| PNLIPRP1   | 0.8378 | 1.1328 | 1.1320 | 0.8562 | 0.9897 | 0.0825 |
| AJAP1      | 0.9545 | 1.0217 | 1.0579 | 0.9247 | 0.9897 | 0.0305 |
| FGFBP2     | 0.9656 | 1.1414 | 1.0329 | 0.8190 | 0.9897 | 0.0674 |
| KLRF1      | 1.0075 | 1.0227 | 1.0522 | 0.8765 | 0.9897 | 0.0389 |
| LOC220686  | 1.0153 | 1.1443 | 0.9778 | 0.8215 | 0.9897 | 0.0665 |
| LOC652713  | 0.9921 | 1.2239 | 0.8886 | 0.8542 | 0.9897 | 0.0834 |
| LOC400807  | 0.9319 | 1.0809 | 1.0238 | 0.9222 | 0.9897 | 0.0380 |
| IFNG       | 0.8761 | 1.0419 | 1.1163 | 0.9246 | 0.9897 | 0.0547 |
| C11orf34   | 0.9291 | 1.0610 | 1.0899 | 0.8790 | 0.9897 | 0.0509 |
| CXorf58    | 0.9649 | 1.0993 | 0.9904 | 0.9044 | 0.9898 | 0.0407 |
| LOC645186  | 0.8908 | 1.1221 | 0.9554 | 0.9907 | 0.9898 | 0.0487 |
| LOC649524  | 0.9234 | 1.0777 | 1.1671 | 0.7909 | 0.9898 | 0.0832 |
| LOC643412  | 1.0162 | 1.1315 | 0.9256 | 0.8858 | 0.9898 | 0.0546 |
| HAS2       | 0.9611 | 1.0866 | 1.0138 | 0.8976 | 0.9898 | 0.0401 |
| MATN4      | 1.0046 | 1.0085 | 1.0319 | 0.9141 | 0.9898 | 0.0259 |
| LOC650930  | 0.8977 | 1.2024 | 0.9678 | 0.8912 | 0.9898 | 0.0730 |
| LOC649447  | 0.8701 | 1.1419 | 1.0876 | 0.8594 | 0.9898 | 0.0731 |
| LOC649905  | 0.9760 | 1.0746 | 1.0368 | 0.8717 | 0.9898 | 0.0443 |
| LOC1001315 | 1.0788 | 0.9627 | 1.0590 | 0.8585 | 0.9898 | 0.0506 |
| PDK1       | 0.9689 | 1.1741 | 0.8944 | 0.9217 | 0.9898 | 0.0633 |
| GRM5       | 0.8418 | 1.1276 | 1.1127 | 0.8770 | 0.9898 | 0.0757 |
| GPR12      | 1.0595 | 0.9671 | 0.9861 | 0.9465 | 0.9898 | 0.0246 |
| LOC1001338 | 0.9832 | 1.0750 | 0.9930 | 0.9080 | 0.9898 | 0.0342 |
| CLEC4A     | 0.9086 | 1.1069 | 1.0393 | 0.9044 | 0.9898 | 0.0500 |
| TMEM57     | 1.0516 | 1.0037 | 1.0859 | 0.8181 | 0.9898 | 0.0597 |
| PLA2R1     | 0.9501 | 1.1254 | 0.9979 | 0.8858 | 0.9898 | 0.0507 |
| CCL14      | 0.9367 | 1.0307 | 1.0121 | 0.9797 | 0.9898 | 0.0206 |
| LOC730909  | 1.0074 | 1.0146 | 0.9878 | 0.9494 | 0.9898 | 0.0146 |
| LOC728276  | 0.9336 | 1.1074 | 0.9822 | 0.9361 | 0.9898 | 0.0408 |
| IFT172     | 0.9577 | 1.1673 | 0.9234 | 0.9108 | 0.9898 | 0.0600 |
| C12orf65   | 0.9616 | 1.1610 | 1.0990 | 0.7377 | 0.9898 | 0.0938 |
| IGSF2      | 0.9356 | 1.1612 | 0.8936 | 0.9689 | 0.9898 | 0.0592 |
| CRCP       | 0.9503 | 1.1253 | 1.0201 | 0.8637 | 0.9898 | 0.0553 |
| MCOLN3     | 0.9124 | 1.0768 | 1.0528 | 0.9172 | 0.9898 | 0.0436 |
| MIRLET7I   | 0.9766 | 1.0847 | 0.9884 | 0.9096 | 0.9898 | 0.0361 |
| SNORA35    | 1.0142 | 1.0012 | 1.0111 | 0.9329 | 0.9898 | 0.0192 |
| MIR517B    | 1.0080 | 0.9963 | 1.0486 | 0.9065 | 0.9898 | 0.0300 |

|            |        |        |        |        |        |        |
|------------|--------|--------|--------|--------|--------|--------|
| APEH       | 0.8372 | 1.4403 | 0.9215 | 0.7603 | 0.9898 | 0.1537 |
| HIST1H2BI  | 1.0281 | 1.0130 | 0.9903 | 0.9280 | 0.9898 | 0.0220 |
| DNAH11     | 0.9899 | 1.0252 | 1.0579 | 0.8863 | 0.9898 | 0.0372 |
| FAM47B     | 0.9426 | 1.0660 | 1.0747 | 0.8761 | 0.9899 | 0.0485 |
| UPK2       | 1.0047 | 1.0627 | 1.0445 | 0.8475 | 0.9899 | 0.0490 |
| KLHL10     | 0.9736 | 1.0745 | 1.0293 | 0.8821 | 0.9899 | 0.0414 |
| LOC650418  | 0.9469 | 1.1117 | 1.0672 | 0.8336 | 0.9899 | 0.0626 |
| TG         | 0.8822 | 1.0122 | 1.0512 | 1.0138 | 0.9899 | 0.0370 |
| KCTD11     | 0.8629 | 1.2449 | 0.9696 | 0.8821 | 0.9899 | 0.0881 |
| STARD13    | 0.9817 | 1.0569 | 1.0108 | 0.9101 | 0.9899 | 0.0308 |
| GPC3       | 1.0461 | 1.0177 | 0.9937 | 0.9020 | 0.9899 | 0.0312 |
| LOC1001325 | 1.0797 | 1.0250 | 1.0255 | 0.8292 | 0.9899 | 0.0551 |
| MGC39545   | 1.0110 | 1.0097 | 1.0023 | 0.9365 | 0.9899 | 0.0179 |
| LOC1001335 | 0.8675 | 1.0724 | 1.1012 | 0.9184 | 0.9899 | 0.0572 |
| MS4A8B     | 0.8990 | 1.0857 | 0.9320 | 1.0428 | 0.9899 | 0.0443 |
| ZBTB44     | 0.7878 | 1.1708 | 1.2236 | 0.7772 | 0.9899 | 0.1202 |
| LOC641978  | 0.9368 | 1.2162 | 0.9138 | 0.8927 | 0.9899 | 0.0760 |
| IFNA8      | 0.9512 | 1.0862 | 1.0461 | 0.8760 | 0.9899 | 0.0474 |
| FLJ20309   | 0.9624 | 1.0601 | 1.0898 | 0.8472 | 0.9899 | 0.0548 |
| TAGAP      | 0.9949 | 1.0592 | 1.0214 | 0.8840 | 0.9899 | 0.0377 |
| LOC643896  | 0.9307 | 1.1165 | 1.0200 | 0.8924 | 0.9899 | 0.0500 |
| AMICA1     | 0.9675 | 1.0215 | 1.0081 | 0.9624 | 0.9899 | 0.0147 |
| LOC402269  | 0.9283 | 1.0723 | 1.0332 | 0.9257 | 0.9899 | 0.0372 |
| FOXR1      | 0.8855 | 1.0619 | 1.0298 | 0.9824 | 0.9899 | 0.0385 |
| LOC284751  | 0.9741 | 1.0513 | 0.9888 | 0.9454 | 0.9899 | 0.0224 |
| NKAPL      | 0.9227 | 1.1132 | 0.9895 | 0.9342 | 0.9899 | 0.0436 |
| LOC728388  | 0.9514 | 0.9773 | 1.0278 | 1.0032 | 0.9899 | 0.0165 |
| LOC1001284 | 0.9298 | 0.9887 | 1.1329 | 0.9083 | 0.9899 | 0.0506 |
| OR8U9      | 0.9767 | 1.0468 | 1.0323 | 0.9039 | 0.9899 | 0.0324 |
| COX4I1     | 0.8728 | 1.3514 | 1.0305 | 0.7050 | 0.9899 | 0.1376 |
| LOC728065  | 0.9455 | 1.1251 | 0.9452 | 0.9439 | 0.9899 | 0.0451 |
| EPHA10     | 0.9322 | 1.1076 | 0.9886 | 0.9313 | 0.9899 | 0.0415 |
| LOC389000  | 0.9540 | 1.1185 | 0.9627 | 0.9245 | 0.9899 | 0.0436 |
| LOC642611  | 0.8723 | 1.0556 | 1.0144 | 1.0174 | 0.9899 | 0.0403 |
| P2RY13     | 0.9418 | 1.0611 | 1.0388 | 0.9180 | 0.9899 | 0.0353 |
| LOC1001340 | 0.9693 | 1.1010 | 1.0452 | 0.8442 | 0.9899 | 0.0556 |
| LOC653253  | 1.0123 | 1.0899 | 0.9109 | 0.9467 | 0.9899 | 0.0394 |
| LOC1001297 | 0.9662 | 1.0900 | 0.9700 | 0.9335 | 0.9899 | 0.0344 |
| LOC653905  | 1.0363 | 1.0630 | 1.0378 | 0.8225 | 0.9899 | 0.0561 |
| LOC730092  | 0.9793 | 1.0274 | 1.0565 | 0.8966 | 0.9899 | 0.0350 |
| CNTD1      | 0.9493 | 1.1547 | 0.9689 | 0.8869 | 0.9899 | 0.0576 |
| EBF3       | 0.8945 | 1.1626 | 1.0333 | 0.8694 | 0.9899 | 0.0679 |
| SREBF2     | 0.8313 | 1.2842 | 1.0544 | 0.7899 | 0.9899 | 0.1140 |
| LOC1001338 | 0.9381 | 1.0455 | 0.9830 | 0.9932 | 0.9899 | 0.0220 |
| LOC1001298 | 0.9324 | 1.0611 | 1.0659 | 0.9004 | 0.9899 | 0.0430 |
| OR51I2     | 0.8901 | 0.9377 | 1.1603 | 0.9716 | 0.9899 | 0.0592 |

|            |        |        |        |        |        |        |
|------------|--------|--------|--------|--------|--------|--------|
| FAM139A    | 1.0240 | 1.0005 | 1.0070 | 0.9283 | 0.9899 | 0.0212 |
| LASS5      | 0.9472 | 1.3394 | 0.8511 | 0.8221 | 0.9899 | 0.1195 |
| C6orf126   | 0.9151 | 1.0491 | 1.0658 | 0.9298 | 0.9900 | 0.0392 |
| LOC1001312 | 0.9821 | 1.0126 | 1.0349 | 0.9303 | 0.9900 | 0.0226 |
| LOC402634  | 0.9304 | 1.0669 | 1.1373 | 0.8252 | 0.9900 | 0.0697 |
| LOC730262  | 0.9212 | 1.0598 | 1.0562 | 0.9226 | 0.9900 | 0.0393 |
| C11orf65   | 0.8692 | 1.2136 | 1.0318 | 0.8452 | 0.9900 | 0.0853 |
| IL24       | 0.9884 | 1.0837 | 0.9728 | 0.9150 | 0.9900 | 0.0350 |
| LOC644733  | 0.8931 | 1.1144 | 1.1048 | 0.8475 | 0.9900 | 0.0697 |
| LOC644360  | 0.8645 | 1.3415 | 0.9682 | 0.7857 | 0.9900 | 0.1230 |
| LOC1001334 | 1.0522 | 0.9926 | 1.0004 | 0.9147 | 0.9900 | 0.0284 |
| PRX        | 0.9061 | 1.0907 | 1.0346 | 0.9285 | 0.9900 | 0.0437 |
| CD96       | 0.9631 | 1.1021 | 0.9720 | 0.9227 | 0.9900 | 0.0389 |
| GCM2       | 0.9602 | 1.0620 | 1.0070 | 0.9309 | 0.9900 | 0.0287 |
| PCDHGC5    | 0.9409 | 1.1089 | 1.0169 | 0.8932 | 0.9900 | 0.0471 |
| LOC653560  | 0.9886 | 1.0690 | 1.0826 | 0.8198 | 0.9900 | 0.0604 |
| DCC        | 0.9358 | 1.0839 | 1.0908 | 0.8495 | 0.9900 | 0.0589 |
| LOC646471  | 0.9360 | 1.0525 | 1.0667 | 0.9048 | 0.9900 | 0.0408 |
| LOC644145  | 0.8679 | 1.2059 | 0.9586 | 0.9277 | 0.9900 | 0.0744 |
| LOC645955  | 0.9632 | 1.0218 | 0.9323 | 1.0427 | 0.9900 | 0.0256 |
| GPR81      | 0.9479 | 1.1252 | 0.9707 | 0.9163 | 0.9900 | 0.0464 |
| HSP90AB2P  | 0.9461 | 1.0818 | 1.0320 | 0.9003 | 0.9900 | 0.0410 |
| LOC647149  | 0.9807 | 1.1014 | 0.9615 | 0.9165 | 0.9900 | 0.0395 |
| MAPK4      | 0.9586 | 1.1030 | 0.9944 | 0.9040 | 0.9900 | 0.0420 |
| LOC1001315 | 0.8579 | 1.2269 | 0.9629 | 0.9125 | 0.9900 | 0.0818 |
| HEPH       | 0.9539 | 1.0381 | 1.0353 | 0.9329 | 0.9900 | 0.0273 |
| LOC647307  | 0.8140 | 1.1748 | 1.2923 | 0.6791 | 0.9900 | 0.1453 |
| TPRG1      | 0.9663 | 1.0474 | 1.0313 | 0.9152 | 0.9901 | 0.0305 |
| LOC1001324 | 0.9757 | 1.0879 | 0.9784 | 0.9182 | 0.9901 | 0.0354 |
| SPAG16     | 0.9144 | 1.0581 | 1.0709 | 0.9168 | 0.9901 | 0.0431 |
| CEACAM16   | 0.9879 | 1.0571 | 0.9933 | 0.9220 | 0.9901 | 0.0276 |
| AK1        | 0.7706 | 1.3017 | 1.1884 | 0.6996 | 0.9901 | 0.1497 |
| LOC1001332 | 1.0072 | 1.0993 | 0.9084 | 0.9454 | 0.9901 | 0.0417 |
| NECAB3     | 0.8799 | 1.4146 | 0.9524 | 0.7133 | 0.9901 | 0.1501 |
| SNORD41    | 1.0238 | 1.0243 | 1.0051 | 0.9071 | 0.9901 | 0.0280 |
| LY6D       | 0.9590 | 1.0850 | 1.0421 | 0.8742 | 0.9901 | 0.0466 |
| ARSF       | 0.9569 | 1.0170 | 1.0590 | 0.9274 | 0.9901 | 0.0296 |
| MIRLET7C   | 0.9074 | 1.1063 | 0.9681 | 0.9786 | 0.9901 | 0.0418 |
| OR5L2      | 0.9495 | 0.9777 | 1.0187 | 1.0145 | 0.9901 | 0.0164 |
| LOC1001329 | 0.9231 | 1.0935 | 1.0016 | 0.9422 | 0.9901 | 0.0383 |
| GALR1      | 0.9404 | 1.0976 | 1.0959 | 0.8265 | 0.9901 | 0.0658 |
| TRIM13     | 0.8976 | 1.1210 | 1.0699 | 0.8719 | 0.9901 | 0.0619 |
| LOC440595  | 0.8857 | 1.1948 | 1.0126 | 0.8674 | 0.9901 | 0.0755 |
| AOC3       | 0.9299 | 1.1166 | 1.0751 | 0.8388 | 0.9901 | 0.0644 |
| LOC1001329 | 0.8985 | 1.1836 | 0.9872 | 0.8911 | 0.9901 | 0.0681 |
| LOC401778  | 0.9588 | 1.1409 | 0.9359 | 0.9249 | 0.9901 | 0.0507 |

|            |        |        |        |        |        |        |
|------------|--------|--------|--------|--------|--------|--------|
| LOC646009  | 0.8823 | 1.0473 | 1.0688 | 0.9622 | 0.9901 | 0.0427 |
| SNORD45C   | 0.9090 | 1.0466 | 1.0420 | 0.9628 | 0.9901 | 0.0332 |
| LOC730417  | 0.9435 | 1.1165 | 0.9794 | 0.9211 | 0.9901 | 0.0438 |
| MYO1H      | 0.9242 | 1.1728 | 0.9713 | 0.8921 | 0.9901 | 0.0630 |
| LOC387820  | 0.8574 | 1.2793 | 0.9935 | 0.8303 | 0.9901 | 0.1028 |
| MYBL2      | 1.0012 | 1.1262 | 0.9220 | 0.9110 | 0.9901 | 0.0496 |
| LOC651635  | 0.9851 | 1.1462 | 0.9241 | 0.9051 | 0.9901 | 0.0548 |
| CNIH3      | 0.8847 | 1.0715 | 1.0481 | 0.9562 | 0.9901 | 0.0431 |
| TMEM95     | 0.9574 | 1.0012 | 1.0193 | 0.9827 | 0.9901 | 0.0132 |
| LOC652799  | 0.9253 | 1.0905 | 1.0211 | 0.9236 | 0.9901 | 0.0405 |
| OR1S2      | 1.0331 | 0.9727 | 1.0249 | 0.9299 | 0.9901 | 0.0241 |
| LOC652856  | 0.9606 | 1.0069 | 1.0785 | 0.9146 | 0.9901 | 0.0350 |
| LOC642504  | 0.9092 | 1.1521 | 0.9384 | 0.9609 | 0.9902 | 0.0550 |
| FKBP8      | 0.8996 | 1.1872 | 1.0520 | 0.8218 | 0.9902 | 0.0812 |
| LOC731282  | 0.8519 | 1.1049 | 0.9449 | 1.0589 | 0.9902 | 0.0570 |
| AADAC      | 0.9973 | 1.0825 | 0.9780 | 0.9029 | 0.9902 | 0.0369 |
| FLJ45513   | 0.9738 | 1.0063 | 0.9830 | 0.9975 | 0.9902 | 0.0073 |
| LOC1001328 | 0.9361 | 1.0324 | 1.0359 | 0.9563 | 0.9902 | 0.0257 |
| MIR1258    | 0.8653 | 1.0671 | 1.1809 | 0.8474 | 0.9902 | 0.0808 |
| RCOR2      | 1.0916 | 1.1318 | 0.8956 | 0.8417 | 0.9902 | 0.0715 |
| MIR539     | 0.8581 | 1.1176 | 1.0130 | 0.9721 | 0.9902 | 0.0537 |
| ERCC-00003 | 0.9411 | 1.0792 | 1.0128 | 0.9276 | 0.9902 | 0.0351 |
| CXorf20    | 0.9844 | 1.1066 | 0.9523 | 0.9174 | 0.9902 | 0.0412 |
| LOC652529  | 0.9599 | 1.0309 | 1.0602 | 0.9098 | 0.9902 | 0.0341 |
| CCDC140    | 0.9982 | 1.0573 | 1.0122 | 0.8931 | 0.9902 | 0.0347 |
| SMG6       | 1.0101 | 1.1671 | 0.8919 | 0.8917 | 0.9902 | 0.0652 |
| FMO6P      | 0.9404 | 1.1858 | 0.9619 | 0.8727 | 0.9902 | 0.0679 |
| CYP24A1    | 0.9361 | 1.0257 | 1.0303 | 0.9688 | 0.9902 | 0.0228 |
| COL19A1    | 0.9797 | 1.0163 | 1.0563 | 0.9086 | 0.9902 | 0.0314 |
| TRAPPC5    | 0.8514 | 1.3325 | 0.9741 | 0.8029 | 0.9902 | 0.1196 |
| LOC649217  | 1.0127 | 1.0369 | 1.0586 | 0.8526 | 0.9902 | 0.0468 |
| LOC642413  | 0.9879 | 0.9955 | 1.0806 | 0.8968 | 0.9902 | 0.0376 |
| LOC158825  | 0.9826 | 1.0520 | 0.9406 | 0.9857 | 0.9902 | 0.0230 |
| LOC652049  | 0.8578 | 1.1065 | 1.0413 | 0.9553 | 0.9902 | 0.0539 |
| SLC35F4    | 0.9323 | 1.1154 | 1.0046 | 0.9086 | 0.9902 | 0.0465 |
| F5         | 0.9356 | 1.1386 | 0.9664 | 0.9204 | 0.9902 | 0.0504 |
| LRRC70     | 0.9418 | 1.0738 | 1.0438 | 0.9016 | 0.9902 | 0.0409 |
| LTB        | 0.9490 | 1.1272 | 0.9997 | 0.8851 | 0.9902 | 0.0513 |
| LOC729385  | 0.9776 | 1.0592 | 0.9477 | 0.9765 | 0.9902 | 0.0240 |
| LOC645908  | 0.9179 | 1.1425 | 1.0457 | 0.8549 | 0.9902 | 0.0644 |
| LOC441424  | 1.0116 | 1.1139 | 0.9110 | 0.9245 | 0.9902 | 0.0469 |
| RNF186     | 0.7564 | 1.0394 | 1.0863 | 1.0789 | 0.9903 | 0.0786 |
| PRR10      | 0.8628 | 1.1080 | 1.0626 | 0.9275 | 0.9903 | 0.0572 |
| C1orf14    | 0.9077 | 1.0690 | 1.0364 | 0.9479 | 0.9903 | 0.0376 |
| LOC1001291 | 0.9045 | 1.0723 | 1.0974 | 0.8867 | 0.9903 | 0.0550 |
| TPRXL      | 0.9815 | 0.9731 | 1.0701 | 0.9363 | 0.9903 | 0.0284 |

|            |        |        |        |        |        |        |
|------------|--------|--------|--------|--------|--------|--------|
| LOC730389  | 0.9258 | 1.0493 | 1.0457 | 0.9402 | 0.9903 | 0.0332 |
| MIR1302-3  | 0.9480 | 1.0125 | 0.9913 | 1.0093 | 0.9903 | 0.0148 |
| LOC442249  | 0.9660 | 1.1062 | 0.9912 | 0.8977 | 0.9903 | 0.0434 |
| FBXO48     | 0.8977 | 1.0773 | 1.0356 | 0.9505 | 0.9903 | 0.0406 |
| MIR93      | 0.9836 | 1.0796 | 0.9171 | 0.9808 | 0.9903 | 0.0335 |
| LOC641947  | 0.8708 | 1.1254 | 1.1032 | 0.8617 | 0.9903 | 0.0718 |
| MIR649     | 0.9271 | 1.1494 | 0.9529 | 0.9317 | 0.9903 | 0.0533 |
| LOC643355  | 0.8485 | 1.0704 | 1.0443 | 0.9980 | 0.9903 | 0.0496 |
| MIR346     | 0.9248 | 1.0907 | 1.0831 | 0.8626 | 0.9903 | 0.0572 |
| MIR1251    | 0.9151 | 1.0885 | 0.9796 | 0.9780 | 0.9903 | 0.0360 |
| TNFSF18    | 0.9151 | 0.9800 | 1.0366 | 1.0295 | 0.9903 | 0.0281 |
| NRXN1      | 0.9603 | 1.0796 | 0.9984 | 0.9229 | 0.9903 | 0.0335 |
| LOC647742  | 0.9656 | 1.0913 | 1.0001 | 0.9041 | 0.9903 | 0.0391 |
| NHSL2      | 0.8879 | 1.1370 | 1.0155 | 0.9208 | 0.9903 | 0.0559 |
| MIR1224    | 0.9106 | 1.1043 | 1.0288 | 0.9176 | 0.9903 | 0.0466 |
| TMEM14E    | 0.9881 | 1.0529 | 0.9475 | 0.9728 | 0.9903 | 0.0225 |
| FOXJ1      | 0.8726 | 1.0948 | 1.0843 | 0.9096 | 0.9903 | 0.0578 |
| FAM160A1   | 0.8861 | 1.1669 | 1.0360 | 0.8723 | 0.9903 | 0.0695 |
| C6orf57    | 0.7830 | 1.3290 | 1.0920 | 0.7574 | 0.9903 | 0.1361 |
| S100B      | 0.9627 | 1.0360 | 0.9505 | 1.0121 | 0.9903 | 0.0202 |
| ZNF235     | 1.0090 | 1.0518 | 1.0618 | 0.8389 | 0.9903 | 0.0518 |
| CFHR1      | 0.8620 | 1.1876 | 1.0308 | 0.8811 | 0.9903 | 0.0758 |
| LOC641990  | 0.8976 | 1.0375 | 1.1086 | 0.9177 | 0.9904 | 0.0501 |
| C13orf26   | 0.9069 | 1.0566 | 1.1306 | 0.8674 | 0.9904 | 0.0620 |
| CPT2       | 0.7765 | 1.3894 | 0.9895 | 0.8060 | 0.9904 | 0.1411 |
| ZNF251     | 0.9822 | 1.1484 | 0.9269 | 0.9040 | 0.9904 | 0.0552 |
| LOC648480  | 0.8192 | 1.0187 | 1.2314 | 0.8922 | 0.9904 | 0.0903 |
| LOC647621  | 0.9444 | 1.1003 | 1.0406 | 0.8762 | 0.9904 | 0.0498 |
| UNC5D      | 0.9637 | 1.0762 | 1.0640 | 0.8577 | 0.9904 | 0.0509 |
| LOC643125  | 0.9211 | 1.1044 | 1.0557 | 0.8804 | 0.9904 | 0.0534 |
| RHCG       | 0.9242 | 1.1313 | 0.9755 | 0.9306 | 0.9904 | 0.0483 |
| C1orf87    | 0.9663 | 1.1311 | 0.9928 | 0.8713 | 0.9904 | 0.0537 |
| LOC391205  | 0.9478 | 1.1321 | 0.9861 | 0.8955 | 0.9904 | 0.0508 |
| APLNR      | 0.9473 | 1.1030 | 1.0059 | 0.9053 | 0.9904 | 0.0428 |
| CCL20      | 0.8167 | 1.1188 | 1.1351 | 0.8910 | 0.9904 | 0.0804 |
| FAM197Y2   | 0.9237 | 1.0795 | 1.0716 | 0.8868 | 0.9904 | 0.0498 |
| LOC1001302 | 1.0178 | 1.0015 | 1.0491 | 0.8932 | 0.9904 | 0.0339 |
| LOC728936  | 0.8449 | 1.1465 | 0.9748 | 0.9954 | 0.9904 | 0.0618 |
| GCNT1      | 0.9043 | 1.2019 | 1.1229 | 0.7326 | 0.9904 | 0.1065 |
| MLLT1      | 0.9307 | 1.1127 | 1.0561 | 0.8621 | 0.9904 | 0.0572 |
| TMEM151A   | 0.9435 | 1.0902 | 1.0016 | 0.9264 | 0.9904 | 0.0369 |
| FLJ46020   | 0.9831 | 1.0841 | 0.9340 | 0.9605 | 0.9904 | 0.0328 |
| LOC728701  | 0.9387 | 0.9996 | 1.0392 | 0.9842 | 0.9904 | 0.0208 |
| PAPSS1     | 0.9239 | 1.3025 | 0.9381 | 0.7972 | 0.9904 | 0.1087 |
| LOC653257  | 1.0102 | 0.9589 | 1.0416 | 0.9510 | 0.9904 | 0.0215 |
| THSD1      | 1.0172 | 1.0250 | 0.9649 | 0.9547 | 0.9904 | 0.0179 |

|            |        |        |        |        |        |        |
|------------|--------|--------|--------|--------|--------|--------|
| LOC648744  | 0.9994 | 1.1964 | 0.9323 | 0.8336 | 0.9904 | 0.0766 |
| MIR744     | 1.0420 | 1.1412 | 0.8494 | 0.9291 | 0.9904 | 0.0639 |
| KLK13      | 0.9489 | 1.0631 | 1.1061 | 0.8437 | 0.9904 | 0.0591 |
| C1orf94    | 0.9133 | 1.1673 | 0.9665 | 0.9148 | 0.9905 | 0.0602 |
| AZI2       | 0.9385 | 1.2254 | 1.0706 | 0.7274 | 0.9905 | 0.1055 |
| LOC644668  | 0.9226 | 1.0919 | 1.0385 | 0.9089 | 0.9905 | 0.0446 |
| NDST2      | 1.0019 | 1.1677 | 1.0178 | 0.7745 | 0.9905 | 0.0811 |
| HSPA7      | 0.9193 | 1.1758 | 0.9075 | 0.9594 | 0.9905 | 0.0628 |
| LOC648803  | 0.8901 | 1.0752 | 0.9577 | 1.0388 | 0.9905 | 0.0415 |
| MIR10A     | 0.8883 | 1.0928 | 0.9696 | 1.0113 | 0.9905 | 0.0426 |
| LOC1001326 | 0.9309 | 1.0978 | 0.9652 | 0.9680 | 0.9905 | 0.0368 |
| KIAA1920   | 1.0202 | 0.9877 | 1.0477 | 0.9063 | 0.9905 | 0.0306 |
| DPYSL5     | 0.8389 | 1.1060 | 1.1202 | 0.8968 | 0.9905 | 0.0718 |
| LOC647579  | 0.9503 | 1.0146 | 1.0836 | 0.9135 | 0.9905 | 0.0374 |
| ERCC-00164 | 1.0357 | 0.9965 | 1.0558 | 0.8740 | 0.9905 | 0.0408 |
| ADAM6      | 0.9094 | 1.1705 | 1.0470 | 0.8351 | 0.9905 | 0.0743 |
| LOC1001312 | 0.8782 | 1.1060 | 1.0229 | 0.9550 | 0.9905 | 0.0485 |
| OR52I1     | 1.0222 | 1.1078 | 0.8812 | 0.9509 | 0.9905 | 0.0485 |
| ELMO2      | 1.0453 | 1.1994 | 0.9406 | 0.7768 | 0.9905 | 0.0889 |
| CEACAM19   | 0.9183 | 1.1124 | 0.9748 | 0.9567 | 0.9905 | 0.0423 |
| TTC6       | 0.9422 | 1.1419 | 1.0044 | 0.8737 | 0.9905 | 0.0571 |
| LOC643936  | 0.9066 | 1.0988 | 1.0853 | 0.8714 | 0.9905 | 0.0591 |
| RBPJL      | 1.0462 | 1.0051 | 0.9692 | 0.9417 | 0.9905 | 0.0226 |
| HCRTR1     | 0.9640 | 1.1218 | 1.0106 | 0.8658 | 0.9906 | 0.0531 |
| OXNAD1     | 0.9616 | 1.0156 | 1.0899 | 0.8951 | 0.9906 | 0.0413 |
| LOC728533  | 0.9321 | 1.4094 | 1.0286 | 0.5920 | 0.9906 | 0.1681 |
| MIR181D    | 0.9619 | 0.9311 | 1.0237 | 1.0456 | 0.9906 | 0.0266 |
| TRIM71     | 0.9824 | 1.0691 | 0.9888 | 0.9220 | 0.9906 | 0.0302 |
| C9orf172   | 1.0174 | 1.0394 | 0.9702 | 0.9352 | 0.9906 | 0.0234 |
| LOC642374  | 0.9646 | 1.1182 | 0.9889 | 0.8906 | 0.9906 | 0.0474 |
| LOC1001345 | 0.9690 | 1.1229 | 1.0000 | 0.8705 | 0.9906 | 0.0520 |
| TBPL2      | 1.0210 | 0.9792 | 1.0494 | 0.9127 | 0.9906 | 0.0297 |
| KLHL2      | 0.9026 | 1.0962 | 1.1684 | 0.7951 | 0.9906 | 0.0860 |
| LOC1001339 | 0.9486 | 1.0510 | 1.0761 | 0.8867 | 0.9906 | 0.0443 |
| NRBP2      | 0.8612 | 1.2359 | 1.0683 | 0.7970 | 0.9906 | 0.1002 |
| LOC343052  | 0.9215 | 1.0937 | 1.1038 | 0.8434 | 0.9906 | 0.0645 |
| SLC40A1    | 0.9453 | 1.1026 | 1.0438 | 0.8707 | 0.9906 | 0.0515 |
| DUX2       | 0.9514 | 1.0530 | 0.9586 | 0.9995 | 0.9906 | 0.0233 |
| LOC644339  | 0.8621 | 1.0796 | 1.0886 | 0.9321 | 0.9906 | 0.0559 |
| PDZD2      | 0.9959 | 1.1084 | 0.9937 | 0.8646 | 0.9906 | 0.0498 |
| GXYLT2     | 0.9085 | 1.0237 | 1.0246 | 1.0058 | 0.9906 | 0.0277 |
| OR2AE1     | 0.9570 | 1.0411 | 1.0218 | 0.9427 | 0.9906 | 0.0241 |
| LOC648830  | 0.9487 | 1.0806 | 1.0311 | 0.9021 | 0.9906 | 0.0401 |
| LOC645137  | 0.9623 | 1.0334 | 1.0947 | 0.8722 | 0.9906 | 0.0479 |
| CCL17      | 0.9057 | 1.1071 | 1.0127 | 0.9371 | 0.9907 | 0.0448 |
| MIR609     | 0.8838 | 1.1313 | 1.0593 | 0.8882 | 0.9907 | 0.0622 |

|            |        |        |        |        |        |        |
|------------|--------|--------|--------|--------|--------|--------|
| STAC       | 0.9711 | 1.0722 | 0.9301 | 0.9892 | 0.9907 | 0.0299 |
| SKAP1      | 0.9764 | 1.0782 | 1.0267 | 0.8813 | 0.9907 | 0.0420 |
| LOC649159  | 0.9534 | 1.1197 | 0.9720 | 0.9176 | 0.9907 | 0.0445 |
| GPR149     | 0.9137 | 1.1237 | 1.0559 | 0.8694 | 0.9907 | 0.0596 |
| HERC5      | 0.8479 | 1.3963 | 0.9916 | 0.7270 | 0.9907 | 0.1456 |
| ERCC-00028 | 1.0188 | 1.0020 | 0.9908 | 0.9511 | 0.9907 | 0.0144 |
| LOC1001299 | 0.9806 | 1.1119 | 1.0343 | 0.8360 | 0.9907 | 0.0582 |
| ZNF764     | 1.2002 | 0.9269 | 1.0399 | 0.7957 | 0.9907 | 0.0858 |
| IGLL3      | 0.9224 | 1.1264 | 1.0262 | 0.8878 | 0.9907 | 0.0539 |
| PCDHGC4    | 0.9755 | 1.0868 | 1.0242 | 0.8763 | 0.9907 | 0.0444 |
| DDTL       | 1.0019 | 1.1233 | 0.9456 | 0.8921 | 0.9907 | 0.0496 |
| SLC13A1    | 0.9492 | 1.0129 | 1.0597 | 0.9411 | 0.9907 | 0.0281 |
| FABP5      | 0.9287 | 1.1674 | 0.9309 | 0.9358 | 0.9907 | 0.0589 |
| LOC643286  | 0.9355 | 1.1150 | 1.0225 | 0.8899 | 0.9907 | 0.0497 |
| LOC1001325 | 0.6797 | 1.1159 | 1.3998 | 0.7675 | 0.9907 | 0.1657 |
| LOC652259  | 0.8710 | 1.0891 | 1.1076 | 0.8952 | 0.9907 | 0.0624 |
| FLJ20712   | 0.8664 | 1.2362 | 0.9416 | 0.9186 | 0.9907 | 0.0833 |
| LOC654194  | 0.8330 | 1.2830 | 1.1008 | 0.7461 | 0.9907 | 0.1232 |
| LOC646841  | 0.9306 | 1.0854 | 1.0927 | 0.8543 | 0.9908 | 0.0589 |
| LOC441736  | 0.9636 | 1.0548 | 0.9995 | 0.9451 | 0.9908 | 0.0242 |
| FLJ16779   | 0.9848 | 1.0617 | 0.9901 | 0.9265 | 0.9908 | 0.0277 |
| DLX1       | 0.9376 | 1.1138 | 1.0294 | 0.8822 | 0.9908 | 0.0510 |
| JAM3       | 0.9080 | 1.1858 | 1.0154 | 0.8540 | 0.9908 | 0.0731 |
| LOC644341  | 0.9997 | 0.9355 | 1.0602 | 0.9677 | 0.9908 | 0.0266 |
| C10orf113  | 0.9409 | 1.0117 | 1.0733 | 0.9373 | 0.9908 | 0.0324 |
| LOC644331  | 0.7591 | 1.1632 | 1.1286 | 0.9123 | 0.9908 | 0.0951 |
| SEMA4G     | 0.8819 | 1.0940 | 1.0847 | 0.9026 | 0.9908 | 0.0571 |
| C1orf187   | 0.9325 | 1.0286 | 1.0235 | 0.9786 | 0.9908 | 0.0225 |
| SOX21      | 1.0102 | 1.0623 | 1.0253 | 0.8654 | 0.9908 | 0.0432 |
| LOC1001292 | 0.9808 | 1.0409 | 1.0280 | 0.9135 | 0.9908 | 0.0288 |
| LOC284412  | 0.9159 | 1.1013 | 0.9761 | 0.9700 | 0.9908 | 0.0392 |
| ATP1A2     | 0.9018 | 1.0504 | 1.0164 | 0.9946 | 0.9908 | 0.0318 |
| OR51I1     | 0.9295 | 1.0686 | 1.0270 | 0.9381 | 0.9908 | 0.0340 |
| CRYGS      | 0.9694 | 1.0454 | 0.9757 | 0.9728 | 0.9908 | 0.0182 |
| PRSS22     | 1.0775 | 0.9942 | 1.0123 | 0.8792 | 0.9908 | 0.0413 |
| LOC647276  | 0.9012 | 1.1264 | 1.0700 | 0.8656 | 0.9908 | 0.0635 |
| MIR544     | 0.8846 | 1.0766 | 0.9946 | 1.0075 | 0.9908 | 0.0397 |
| LOC650874  | 0.9238 | 1.0431 | 0.9968 | 0.9996 | 0.9908 | 0.0247 |
| DDX53      | 0.9490 | 0.9797 | 1.0237 | 1.0109 | 0.9908 | 0.0167 |
| LRIT1      | 0.9255 | 1.0979 | 0.9831 | 0.9568 | 0.9908 | 0.0376 |
| GPR52      | 0.9051 | 1.1250 | 1.0283 | 0.9050 | 0.9908 | 0.0533 |
| GRM4       | 0.9281 | 1.0020 | 1.0772 | 0.9560 | 0.9908 | 0.0326 |
| PTHLH      | 0.9953 | 1.1044 | 1.0019 | 0.8619 | 0.9909 | 0.0497 |
| KIAA0261   | 0.8554 | 1.3597 | 0.9337 | 0.8146 | 0.9909 | 0.1254 |
| SLC22A12   | 0.9956 | 0.9614 | 1.0054 | 1.0009 | 0.9909 | 0.0100 |
| SERPINE3   | 0.8774 | 1.0937 | 1.0564 | 0.9359 | 0.9909 | 0.0506 |



|            |        |        |        |        |        |        |
|------------|--------|--------|--------|--------|--------|--------|
| LPO        | 0.9422 | 1.0066 | 1.0130 | 1.0016 | 0.9909 | 0.0164 |
| PRTN3      | 0.9776 | 1.0746 | 1.0272 | 0.8840 | 0.9909 | 0.0408 |
| KC6        | 0.9200 | 1.1484 | 1.0200 | 0.8750 | 0.9909 | 0.0606 |
| VTN        | 0.9832 | 1.0559 | 1.0958 | 0.8286 | 0.9909 | 0.0589 |
| MIR802     | 0.9087 | 1.0548 | 0.9755 | 1.0246 | 0.9909 | 0.0319 |
| MIR365-2   | 0.9533 | 1.0614 | 0.9932 | 0.9556 | 0.9909 | 0.0252 |
| TCTEX1D1   | 0.9796 | 1.0153 | 1.0143 | 0.9544 | 0.9909 | 0.0147 |
| IER5       | 0.9192 | 1.3292 | 0.9138 | 0.8015 | 0.9909 | 0.1160 |
| FLJ23356   | 0.9490 | 1.1830 | 0.8986 | 0.9330 | 0.9909 | 0.0649 |
| LOC392447  | 0.8412 | 1.1532 | 0.9794 | 0.9899 | 0.9909 | 0.0638 |
| LOC729700  | 0.9860 | 1.0772 | 1.0096 | 0.8909 | 0.9909 | 0.0385 |
| CTNNA3     | 0.9795 | 1.0508 | 1.0169 | 0.9165 | 0.9909 | 0.0288 |
| FLJ21839   | 1.0380 | 0.9662 | 1.0562 | 0.9034 | 0.9909 | 0.0351 |
| LOC1001300 | 0.9599 | 1.2026 | 0.9703 | 0.8310 | 0.9909 | 0.0773 |
| NUAK2      | 0.8309 | 1.3096 | 0.9945 | 0.8288 | 0.9909 | 0.1131 |
| LOC641994  | 0.9368 | 1.1340 | 1.0443 | 0.8487 | 0.9909 | 0.0622 |
| OR5D16     | 0.9038 | 1.1245 | 1.0161 | 0.9194 | 0.9910 | 0.0510 |
| LOC1001325 | 0.9478 | 1.1000 | 0.9920 | 0.9242 | 0.9910 | 0.0390 |
| ARX        | 1.0405 | 1.1295 | 0.9767 | 0.8172 | 0.9910 | 0.0658 |
| USH1C      | 0.9648 | 1.0564 | 1.0159 | 0.9268 | 0.9910 | 0.0285 |
| LOC641716  | 0.9362 | 0.9782 | 1.0876 | 0.9620 | 0.9910 | 0.0333 |
| MUSK       | 1.0090 | 1.1196 | 0.9808 | 0.8545 | 0.9910 | 0.0545 |
| LOC645278  | 0.9187 | 1.0686 | 1.0889 | 0.8877 | 0.9910 | 0.0512 |
| LOC283867  | 0.8944 | 1.1794 | 0.9910 | 0.8992 | 0.9910 | 0.0666 |
| LOC641914  | 1.0260 | 1.0586 | 1.0664 | 0.8130 | 0.9910 | 0.0600 |
| LOC729394  | 0.9227 | 1.0797 | 1.0643 | 0.8973 | 0.9910 | 0.0472 |
| LOC650120  | 0.9619 | 1.1238 | 0.9605 | 0.9179 | 0.9910 | 0.0454 |
| ITGAL      | 0.9744 | 1.0230 | 1.0834 | 0.8833 | 0.9910 | 0.0423 |
| TMPRSS3    | 0.9717 | 1.1242 | 0.9816 | 0.8865 | 0.9910 | 0.0493 |
| TMEM91     | 0.9943 | 1.1269 | 0.8940 | 0.9488 | 0.9910 | 0.0497 |
| LOC732416  | 0.8115 | 1.0988 | 1.0553 | 0.9986 | 0.9910 | 0.0633 |
| UBTD2      | 1.0329 | 1.1522 | 1.0133 | 0.7657 | 0.9910 | 0.0811 |
| TP73L      | 0.9392 | 1.0969 | 0.9747 | 0.9533 | 0.9910 | 0.0360 |
| LOC400419  | 0.9662 | 1.0075 | 0.9752 | 1.0152 | 0.9910 | 0.0120 |
| LOC1001338 | 0.9964 | 1.0761 | 0.9775 | 0.9142 | 0.9910 | 0.0333 |
| LOC646128  | 0.8739 | 1.0847 | 1.1231 | 0.8825 | 0.9910 | 0.0657 |
| LOC553137  | 1.0118 | 1.0378 | 1.0094 | 0.9051 | 0.9910 | 0.0294 |
| RASGRP3    | 1.0186 | 0.9962 | 1.0021 | 0.9473 | 0.9910 | 0.0154 |
| LOC644749  | 0.9261 | 1.0702 | 1.0130 | 0.9549 | 0.9911 | 0.0320 |
| KIN        | 0.9733 | 1.0557 | 0.9884 | 0.9468 | 0.9911 | 0.0232 |
| SULT1C2    | 0.8852 | 1.1160 | 1.0343 | 0.9287 | 0.9911 | 0.0521 |
| GGT3       | 0.9905 | 1.0723 | 0.9668 | 0.9347 | 0.9911 | 0.0294 |
| LOC1001339 | 0.9139 | 1.0622 | 1.1105 | 0.8777 | 0.9911 | 0.0564 |
| LOC649757  | 0.9681 | 1.0539 | 1.0681 | 0.8742 | 0.9911 | 0.0448 |
| C21orf93   | 0.9010 | 1.0126 | 1.1541 | 0.8966 | 0.9911 | 0.0606 |
| VMD2L3     | 0.8854 | 1.1151 | 1.0687 | 0.8952 | 0.9911 | 0.0590 |

|            |        |        |        |        |        |        |
|------------|--------|--------|--------|--------|--------|--------|
| FXVD2      | 0.9456 | 1.0675 | 1.0060 | 0.9452 | 0.9911 | 0.0292 |
| KIAA1875   | 1.0149 | 1.1166 | 1.0207 | 0.8122 | 0.9911 | 0.0640 |
| LOC650262  | 0.9116 | 1.0645 | 1.1213 | 0.8669 | 0.9911 | 0.0606 |
| CRH        | 0.9764 | 1.0657 | 1.0203 | 0.9020 | 0.9911 | 0.0348 |
| LOC643748  | 0.9293 | 1.0752 | 1.0327 | 0.9272 | 0.9911 | 0.0373 |
| SNORD20    | 0.8689 | 1.1212 | 1.0421 | 0.9322 | 0.9911 | 0.0562 |
| C6orf35    | 1.0139 | 1.0182 | 1.0735 | 0.8588 | 0.9911 | 0.0461 |
| NUDT4P1    | 0.9205 | 1.0894 | 1.0071 | 0.9474 | 0.9911 | 0.0374 |
| LOC644760  | 0.8690 | 1.1778 | 1.0628 | 0.8549 | 0.9911 | 0.0782 |
| LOC651380  | 0.9364 | 1.2929 | 0.9823 | 0.7529 | 0.9911 | 0.1121 |
| LOC650995  | 0.9766 | 1.2257 | 0.9359 | 0.8263 | 0.9911 | 0.0844 |
| ZNF180     | 0.9233 | 1.0962 | 0.9655 | 0.9794 | 0.9911 | 0.0370 |
| LOC1001335 | 0.9223 | 1.1785 | 0.8384 | 1.0254 | 0.9911 | 0.0732 |
| MIR891B    | 0.9105 | 1.0657 | 1.0356 | 0.9528 | 0.9911 | 0.0360 |
| LOC648521  | 0.9270 | 1.0249 | 1.0697 | 0.9429 | 0.9912 | 0.0339 |
| ETV5       | 0.8912 | 1.1417 | 1.0118 | 0.9199 | 0.9912 | 0.0564 |
| LOC642675  | 1.0141 | 1.1579 | 0.9512 | 0.8414 | 0.9912 | 0.0661 |
| ADH4       | 0.9248 | 1.1100 | 0.9964 | 0.9336 | 0.9912 | 0.0427 |
| MSH3       | 0.8685 | 1.2127 | 1.1546 | 0.7289 | 0.9912 | 0.1153 |
| C3orf35    | 0.9627 | 1.1149 | 0.9806 | 0.9066 | 0.9912 | 0.0441 |
| LOC653917  | 1.0057 | 1.0714 | 1.0632 | 0.8245 | 0.9912 | 0.0575 |
| LOC645515  | 0.9359 | 1.2371 | 1.0938 | 0.6980 | 0.9912 | 0.1155 |
| CD28       | 0.9050 | 1.0056 | 1.0698 | 0.9844 | 0.9912 | 0.0340 |
| SLC16A5    | 0.9820 | 1.0446 | 1.0292 | 0.9091 | 0.9912 | 0.0305 |
| ARMCX6     | 0.8585 | 1.3452 | 1.0403 | 0.7208 | 0.9912 | 0.1349 |
| LOC253482  | 1.0120 | 1.1067 | 0.9375 | 0.9087 | 0.9912 | 0.0442 |
| GIGYF2     | 0.8258 | 1.1292 | 1.0821 | 0.9278 | 0.9912 | 0.0699 |
| LOC642943  | 0.8776 | 1.0139 | 1.1047 | 0.9687 | 0.9912 | 0.0473 |
| MGAT4C     | 0.9566 | 1.0143 | 1.0703 | 0.9237 | 0.9912 | 0.0323 |
| RAB3C      | 0.8989 | 1.0673 | 1.0116 | 0.9872 | 0.9912 | 0.0350 |
| LOC644023  | 0.8998 | 1.0634 | 1.0958 | 0.9059 | 0.9912 | 0.0515 |
| DKK1       | 0.9279 | 1.1336 | 1.0107 | 0.8928 | 0.9913 | 0.0535 |
| LOC649853  | 0.9278 | 1.1963 | 0.9653 | 0.8756 | 0.9913 | 0.0708 |
| OR4S2      | 0.9451 | 1.0699 | 1.0677 | 0.8824 | 0.9913 | 0.0466 |
| LOC645287  | 1.0596 | 1.0261 | 0.9668 | 0.9125 | 0.9913 | 0.0325 |
| LOC653047  | 0.9594 | 1.1103 | 0.9944 | 0.9010 | 0.9913 | 0.0441 |
| CDH5       | 0.9377 | 1.0887 | 1.0358 | 0.9029 | 0.9913 | 0.0430 |
| FLJ34969   | 0.8741 | 1.0898 | 1.1437 | 0.8575 | 0.9913 | 0.0734 |
| C10orf79   | 0.9050 | 1.0705 | 1.0884 | 0.9013 | 0.9913 | 0.0510 |
| PLEKHG4B   | 0.9699 | 1.1073 | 0.9804 | 0.9076 | 0.9913 | 0.0419 |
| RFTN1      | 0.9186 | 1.0540 | 1.0303 | 0.9621 | 0.9913 | 0.0311 |
| IGF1       | 0.9316 | 1.0837 | 1.0391 | 0.9108 | 0.9913 | 0.0417 |
| LOC643371  | 0.8998 | 1.0465 | 1.0472 | 0.9716 | 0.9913 | 0.0353 |
| AKAP11     | 0.8651 | 1.2250 | 1.0527 | 0.8223 | 0.9913 | 0.0926 |
| LOC654114  | 0.9780 | 1.2285 | 1.0586 | 0.7001 | 0.9913 | 0.1102 |
| LOC286478  | 0.8990 | 1.1208 | 1.0381 | 0.9072 | 0.9913 | 0.0537 |

|            |        |        |        |        |        |        |
|------------|--------|--------|--------|--------|--------|--------|
| TNFSF13B   | 0.8948 | 1.2482 | 0.9545 | 0.8677 | 0.9913 | 0.0875 |
| LOC645652  | 0.9060 | 1.1401 | 1.0339 | 0.8851 | 0.9913 | 0.0595 |
| HLA-DMA    | 0.8639 | 1.2417 | 1.0851 | 0.7744 | 0.9913 | 0.1060 |
| EFCAB2     | 0.9291 | 1.1467 | 0.9471 | 0.9422 | 0.9913 | 0.0520 |
| UCP3       | 0.9546 | 1.1578 | 0.9607 | 0.8921 | 0.9913 | 0.0576 |
| PPP1R2P3   | 1.0127 | 0.9643 | 0.9718 | 1.0164 | 0.9913 | 0.0135 |
| LOC1001329 | 0.9518 | 1.1094 | 1.0571 | 0.8469 | 0.9913 | 0.0582 |
| ARSH       | 0.8777 | 1.1221 | 1.0478 | 0.9177 | 0.9913 | 0.0567 |
| LOC648816  | 1.0139 | 1.0339 | 1.0352 | 0.8823 | 0.9913 | 0.0367 |
| SNORA31    | 0.9407 | 1.1022 | 1.0196 | 0.9028 | 0.9913 | 0.0443 |
| LOC653751  | 0.8707 | 1.0346 | 1.0103 | 1.0497 | 0.9913 | 0.0410 |
| LOC647942  | 0.9778 | 1.0880 | 0.9217 | 0.9779 | 0.9913 | 0.0348 |
| LOC646805  | 0.9029 | 1.0900 | 1.0575 | 0.9150 | 0.9913 | 0.0481 |
| KRT18P40   | 0.9446 | 1.1001 | 1.0028 | 0.9178 | 0.9913 | 0.0404 |
| MGC23284   | 0.9875 | 1.1730 | 0.9896 | 0.8152 | 0.9913 | 0.0730 |
| HMCN1      | 0.9857 | 0.9973 | 0.9802 | 1.0022 | 0.9914 | 0.0051 |
| SDC4       | 0.9444 | 1.2581 | 0.8989 | 0.8639 | 0.9914 | 0.0904 |
| NPY2R      | 0.9549 | 1.0569 | 1.0205 | 0.9331 | 0.9914 | 0.0287 |
| LOC401052  | 0.9468 | 1.2184 | 1.0064 | 0.7938 | 0.9914 | 0.0879 |
| SNORD114-8 | 1.0294 | 1.0874 | 0.9470 | 0.9015 | 0.9914 | 0.0415 |
| LOC1001302 | 0.9140 | 1.0952 | 1.0367 | 0.9196 | 0.9914 | 0.0447 |
| PRTG       | 0.9434 | 1.0727 | 1.0336 | 0.9157 | 0.9914 | 0.0370 |
| LOC1001332 | 0.8797 | 1.2831 | 0.9978 | 0.8049 | 0.9914 | 0.1050 |
| LOC1001292 | 0.9139 | 1.1109 | 1.1506 | 0.7901 | 0.9914 | 0.0847 |
| PCSK1      | 0.8862 | 1.0803 | 1.0471 | 0.9519 | 0.9914 | 0.0444 |
| TAF8       | 1.0081 | 1.0874 | 0.9719 | 0.8980 | 0.9914 | 0.0394 |
| BARX2      | 0.8873 | 1.1583 | 1.0373 | 0.8826 | 0.9914 | 0.0662 |
| ZNF678     | 0.9846 | 1.0471 | 1.0339 | 0.9000 | 0.9914 | 0.0333 |
| LCE2A      | 0.9064 | 1.0973 | 0.9871 | 0.9748 | 0.9914 | 0.0395 |
| LOC647536  | 0.8972 | 1.0672 | 1.0888 | 0.9124 | 0.9914 | 0.0503 |
| LOC650024  | 0.9481 | 1.0427 | 1.0851 | 0.8896 | 0.9914 | 0.0444 |
| ZNF167     | 0.9635 | 1.0720 | 1.0540 | 0.8760 | 0.9914 | 0.0452 |
| CAPS2      | 0.8172 | 1.2468 | 1.0408 | 0.8607 | 0.9914 | 0.0980 |
| FLJ16323   | 0.8583 | 1.1367 | 1.0309 | 0.9396 | 0.9914 | 0.0599 |
| ZNF560     | 0.9221 | 0.9853 | 1.1823 | 0.8759 | 0.9914 | 0.0675 |
| MIR297     | 0.9358 | 1.0979 | 0.9934 | 0.9384 | 0.9914 | 0.0379 |
| LOC728034  | 0.9008 | 1.1528 | 1.0755 | 0.8364 | 0.9914 | 0.0738 |
| PPEF2      | 0.9462 | 1.0508 | 1.0592 | 0.9093 | 0.9914 | 0.0375 |
| ACSM1      | 0.9493 | 1.0486 | 1.0266 | 0.9410 | 0.9914 | 0.0271 |
| PXK        | 0.9694 | 1.1413 | 0.9914 | 0.8635 | 0.9914 | 0.0572 |
| TBR1       | 0.9316 | 1.0925 | 1.0110 | 0.9305 | 0.9914 | 0.0386 |
| LOC120376  | 0.9539 | 1.1493 | 0.9580 | 0.9045 | 0.9914 | 0.0540 |
| LOC441601  | 0.9535 | 0.9685 | 1.1117 | 0.9319 | 0.9914 | 0.0408 |
| LINGO2     | 0.9741 | 1.0203 | 1.0187 | 0.9525 | 0.9914 | 0.0168 |
| DEFB109    | 0.8805 | 1.1545 | 0.9880 | 0.9427 | 0.9914 | 0.0587 |
| LOC646266  | 0.9366 | 1.0538 | 1.0794 | 0.8960 | 0.9914 | 0.0445 |

|            |        |        |        |        |        |        |
|------------|--------|--------|--------|--------|--------|--------|
| LOC1001329 | 0.9962 | 0.9825 | 1.0870 | 0.9000 | 0.9914 | 0.0383 |
| LOC440125  | 0.8789 | 1.0694 | 1.0516 | 0.9658 | 0.9914 | 0.0438 |
| NTN5       | 1.0477 | 1.0991 | 0.9348 | 0.8841 | 0.9914 | 0.0496 |
| LOC652733  | 0.8980 | 1.0738 | 1.1100 | 0.8839 | 0.9914 | 0.0586 |
| MGC15634   | 0.9186 | 1.1881 | 0.9793 | 0.8798 | 0.9914 | 0.0687 |
| GAFA1      | 0.9850 | 1.0787 | 0.9927 | 0.9093 | 0.9914 | 0.0346 |
| LOC1001319 | 0.9364 | 1.0820 | 0.9895 | 0.9578 | 0.9914 | 0.0321 |
| POU1F1     | 0.9592 | 1.0489 | 1.0116 | 0.9461 | 0.9914 | 0.0238 |
| COX6A1     | 1.0172 | 1.1941 | 1.1151 | 0.6395 | 0.9914 | 0.1228 |
| LOC652781  | 0.9786 | 1.0685 | 1.0176 | 0.9012 | 0.9915 | 0.0353 |
| PNPLA7     | 0.9181 | 1.3036 | 0.9652 | 0.7789 | 0.9915 | 0.1113 |
| LOC285620  | 0.9583 | 1.0682 | 1.0661 | 0.8733 | 0.9915 | 0.0470 |
| LOC642134  | 0.9747 | 1.0963 | 0.9923 | 0.9026 | 0.9915 | 0.0400 |
| C10orf59   | 0.9667 | 1.1027 | 1.0369 | 0.8596 | 0.9915 | 0.0520 |
| TBC1D10C   | 0.9183 | 1.0281 | 1.0186 | 1.0010 | 0.9915 | 0.0250 |
| TMOD4      | 0.9192 | 1.1640 | 0.9053 | 0.9775 | 0.9915 | 0.0596 |
| CRIP3      | 0.9175 | 1.1272 | 0.9631 | 0.9581 | 0.9915 | 0.0464 |
| KIAA2018   | 0.9654 | 1.0842 | 1.0599 | 0.8565 | 0.9915 | 0.0518 |
| EFCAB4B    | 0.9176 | 1.1348 | 1.0862 | 0.8275 | 0.9915 | 0.0718 |
| TEX9       | 0.9255 | 1.0857 | 1.1143 | 0.8405 | 0.9915 | 0.0653 |
| ADAMTSL3   | 0.9576 | 0.9379 | 1.0997 | 0.9709 | 0.9915 | 0.0367 |
| LOC645294  | 1.0183 | 1.0532 | 0.9479 | 0.9467 | 0.9915 | 0.0265 |
| TBC1D3H    | 0.9831 | 1.0479 | 1.0144 | 0.9208 | 0.9915 | 0.0270 |
| PCDH7      | 0.9772 | 1.0103 | 1.0380 | 0.9407 | 0.9915 | 0.0210 |
| FLJ35776   | 0.9387 | 1.1351 | 1.0001 | 0.8922 | 0.9915 | 0.0527 |
| HESX1      | 0.9269 | 1.0846 | 1.0051 | 0.9495 | 0.9915 | 0.0351 |
| SNORA27    | 0.7274 | 1.1913 | 1.1052 | 0.9423 | 0.9916 | 0.1021 |
| LOC728961  | 0.9449 | 1.0176 | 1.0052 | 0.9985 | 0.9916 | 0.0161 |
| LOC729835  | 0.9579 | 1.0554 | 1.0256 | 0.9273 | 0.9916 | 0.0296 |
| TRPM3      | 0.9257 | 1.0785 | 1.0355 | 0.9266 | 0.9916 | 0.0388 |
| SLC26A1    | 0.9452 | 1.0759 | 1.0345 | 0.9108 | 0.9916 | 0.0383 |
| OR8D2      | 0.8852 | 1.0026 | 0.9684 | 1.1101 | 0.9916 | 0.0466 |
| GHRHR      | 0.9386 | 1.1015 | 1.0196 | 0.9065 | 0.9916 | 0.0437 |
| FLJ41821   | 0.9503 | 1.0504 | 1.0514 | 0.9142 | 0.9916 | 0.0350 |
| LOC1001294 | 0.8769 | 1.2530 | 1.0895 | 0.7470 | 0.9916 | 0.1121 |
| LOC652495  | 0.9270 | 1.0293 | 1.0617 | 0.9483 | 0.9916 | 0.0321 |
| LOC1001282 | 0.9194 | 1.0853 | 1.0948 | 0.8668 | 0.9916 | 0.0579 |
| JCLN       | 0.9744 | 1.0651 | 1.0027 | 0.9243 | 0.9916 | 0.0294 |
| SH3MD4     | 0.9109 | 1.0882 | 0.9948 | 0.9725 | 0.9916 | 0.0367 |
| ZFP57      | 0.9913 | 1.1341 | 0.9471 | 0.8939 | 0.9916 | 0.0515 |
| STK32A     | 0.9652 | 0.9814 | 1.0129 | 1.0069 | 0.9916 | 0.0111 |
| LOC641753  | 0.9344 | 1.0756 | 1.0304 | 0.9261 | 0.9916 | 0.0367 |
| LOC649293  | 0.9999 | 1.1132 | 1.0059 | 0.8476 | 0.9916 | 0.0546 |
| TMEM75     | 0.9163 | 1.0206 | 1.0957 | 0.9340 | 0.9916 | 0.0415 |
| AP4E1      | 1.0012 | 1.2819 | 0.9165 | 0.7670 | 0.9916 | 0.1082 |
| ZNF382     | 0.8991 | 1.1047 | 1.0652 | 0.8975 | 0.9916 | 0.0545 |

|            |        |        |        |        |        |        |
|------------|--------|--------|--------|--------|--------|--------|
| LOC642948  | 0.9783 | 1.0476 | 1.0494 | 0.8913 | 0.9916 | 0.0373 |
| ITPRIPL1   | 0.9515 | 1.0796 | 1.0367 | 0.8988 | 0.9917 | 0.0408 |
| MIR663B    | 0.9423 | 1.0318 | 1.1112 | 0.8813 | 0.9917 | 0.0504 |
| GPD2       | 0.9744 | 1.0781 | 0.9795 | 0.9347 | 0.9917 | 0.0305 |
| LOC646082  | 0.9158 | 1.0596 | 1.0560 | 0.9353 | 0.9917 | 0.0384 |
| LOC651751  | 0.8638 | 1.1988 | 0.9798 | 0.9243 | 0.9917 | 0.0730 |
| OR1Q1      | 1.0244 | 1.1134 | 0.9480 | 0.8809 | 0.9917 | 0.0501 |
| LOC340888  | 0.9032 | 1.0783 | 1.0639 | 0.9213 | 0.9917 | 0.0461 |
| HTR7       | 0.9359 | 1.1216 | 1.0111 | 0.8981 | 0.9917 | 0.0493 |
| PVALB      | 0.9542 | 1.1695 | 0.9492 | 0.8939 | 0.9917 | 0.0608 |
| LOC728257  | 0.9487 | 1.1125 | 1.0091 | 0.8966 | 0.9917 | 0.0464 |
| LOC728003  | 1.0380 | 0.9908 | 1.0360 | 0.9020 | 0.9917 | 0.0318 |
| SIRT4      | 0.9921 | 1.1573 | 0.9848 | 0.8327 | 0.9917 | 0.0663 |
| TSGA13     | 0.9220 | 1.0263 | 1.1146 | 0.9039 | 0.9917 | 0.0490 |
| SLC22A15   | 0.9671 | 1.0772 | 1.0593 | 0.8633 | 0.9917 | 0.0491 |
| LOC642250  | 0.9524 | 1.0561 | 1.0773 | 0.8811 | 0.9917 | 0.0459 |
| LOC1001345 | 1.0507 | 1.0547 | 1.0302 | 0.8313 | 0.9917 | 0.0537 |
| HIST1H2AM  | 0.8554 | 1.4194 | 0.9355 | 0.7567 | 0.9917 | 0.1472 |
| LOC1001279 | 0.9688 | 1.0430 | 1.0434 | 0.9117 | 0.9917 | 0.0319 |
| LOC651102  | 0.9238 | 1.0748 | 1.0604 | 0.9079 | 0.9917 | 0.0440 |
| MIR504     | 0.9613 | 1.0356 | 1.0655 | 0.9045 | 0.9917 | 0.0364 |
| ATP4B      | 0.9365 | 1.0717 | 1.0566 | 0.9022 | 0.9917 | 0.0425 |
| LOC644663  | 0.9754 | 1.0595 | 1.0612 | 0.8708 | 0.9917 | 0.0450 |
| LOC649504  | 0.9850 | 1.0543 | 0.9806 | 0.9471 | 0.9917 | 0.0225 |
| ISX        | 0.9828 | 1.1504 | 0.9429 | 0.8909 | 0.9917 | 0.0561 |
| SNX24      | 0.9886 | 1.0910 | 1.0308 | 0.8566 | 0.9918 | 0.0497 |
| LOC645871  | 0.9904 | 1.0375 | 0.9996 | 0.9395 | 0.9918 | 0.0202 |
| CYP4F3     | 0.9447 | 1.0382 | 1.0983 | 0.8859 | 0.9918 | 0.0474 |
| AOAH       | 0.9620 | 1.1400 | 0.9615 | 0.9036 | 0.9918 | 0.0513 |
| FLJ27465   | 0.9480 | 1.0718 | 1.0381 | 0.9092 | 0.9918 | 0.0379 |
| AKR1C2     | 0.9467 | 1.0588 | 1.0269 | 0.9347 | 0.9918 | 0.0303 |
| PEX3       | 0.9214 | 1.0744 | 1.0053 | 0.9660 | 0.9918 | 0.0324 |
| CHST11     | 0.9695 | 1.0642 | 1.1957 | 0.7378 | 0.9918 | 0.0965 |
| HYI        | 0.8856 | 1.1088 | 1.0138 | 0.9590 | 0.9918 | 0.0470 |
| LOC644574  | 0.8172 | 1.1963 | 1.0248 | 0.9288 | 0.9918 | 0.0803 |
| LOC729898  | 0.9317 | 1.0976 | 0.9995 | 0.9384 | 0.9918 | 0.0384 |
| LOC731017  | 0.9880 | 1.1444 | 0.9939 | 0.8408 | 0.9918 | 0.0620 |
| KIAA0100   | 1.0193 | 1.1417 | 1.0943 | 0.7119 | 0.9918 | 0.0966 |
| LOC645066  | 0.9060 | 1.0736 | 1.0400 | 0.9476 | 0.9918 | 0.0391 |
| PKD2       | 0.9991 | 1.1209 | 1.0142 | 0.8330 | 0.9918 | 0.0595 |
| LPAR4      | 0.8978 | 1.1910 | 0.9901 | 0.8884 | 0.9918 | 0.0703 |
| KIR3DP1    | 0.9328 | 1.0759 | 0.9444 | 1.0141 | 0.9918 | 0.0333 |
| C13orf35   | 0.9970 | 1.0737 | 1.0234 | 0.8732 | 0.9918 | 0.0426 |
| DPRX       | 0.9484 | 0.9885 | 1.0286 | 1.0019 | 0.9918 | 0.0167 |
| RNASE9     | 0.8293 | 1.1488 | 1.0650 | 0.9242 | 0.9918 | 0.0713 |
| LOC650422  | 0.9268 | 1.1570 | 0.9487 | 0.9349 | 0.9918 | 0.0552 |

|            |        |        |        |        |        |        |
|------------|--------|--------|--------|--------|--------|--------|
| RECK       | 0.9890 | 1.1453 | 0.9767 | 0.8563 | 0.9918 | 0.0593 |
| C17orf74   | 0.9070 | 1.1779 | 0.9545 | 0.9279 | 0.9918 | 0.0628 |
| MIR96      | 0.9347 | 1.0255 | 1.0382 | 0.9689 | 0.9918 | 0.0243 |
| C7         | 0.9632 | 1.0740 | 0.9438 | 0.9864 | 0.9918 | 0.0287 |
| LOC400464  | 0.8595 | 1.0556 | 1.0844 | 0.9678 | 0.9918 | 0.0506 |
| LOC1001325 | 0.9762 | 1.0896 | 1.0470 | 0.8546 | 0.9919 | 0.0514 |
| FPR2       | 0.9318 | 1.0420 | 1.0293 | 0.9644 | 0.9919 | 0.0263 |
| LOC653510  | 0.9257 | 1.0299 | 1.1369 | 0.8749 | 0.9919 | 0.0581 |
| SNORD114-1 | 0.9662 | 0.9750 | 1.1170 | 0.9092 | 0.9919 | 0.0442 |
| EN1        | 0.9271 | 0.9962 | 1.0983 | 0.9459 | 0.9919 | 0.0383 |
| ST7OT4     | 0.9833 | 1.0938 | 0.9701 | 0.9202 | 0.9919 | 0.0366 |
| LOC645585  | 0.9176 | 1.0706 | 0.9369 | 1.0425 | 0.9919 | 0.0380 |
| SCARNA1    | 1.0158 | 1.0325 | 1.0770 | 0.8422 | 0.9919 | 0.0515 |
| MYEOV2     | 1.0302 | 1.1285 | 0.9775 | 0.8313 | 0.9919 | 0.0620 |
| KLRC2      | 0.9646 | 1.0848 | 1.0023 | 0.9158 | 0.9919 | 0.0357 |
| UTF1       | 1.0759 | 0.9823 | 1.0131 | 0.8962 | 0.9919 | 0.0374 |
| LOC1001310 | 0.9233 | 1.0529 | 1.0054 | 0.9860 | 0.9919 | 0.0268 |
| LOC1001289 | 0.9507 | 1.0963 | 1.0278 | 0.8928 | 0.9919 | 0.0445 |
| GAL3ST1    | 0.9235 | 1.0781 | 1.0086 | 0.9573 | 0.9919 | 0.0336 |
| LOC645128  | 0.8912 | 1.2458 | 0.9967 | 0.8338 | 0.9919 | 0.0911 |
| CCDC64B    | 0.9821 | 1.0772 | 0.9946 | 0.9136 | 0.9919 | 0.0336 |
| STEAP1     | 0.8597 | 1.3808 | 1.0302 | 0.6968 | 0.9919 | 0.1464 |
| MIR54811   | 0.9407 | 1.0962 | 1.0249 | 0.9057 | 0.9919 | 0.0428 |
| LOC284371  | 1.0160 | 1.1249 | 0.9909 | 0.8358 | 0.9919 | 0.0596 |
| CSF1R      | 0.9056 | 1.0153 | 1.0715 | 0.9753 | 0.9919 | 0.0349 |
| GPR37L1    | 0.9336 | 1.1008 | 0.9950 | 0.9383 | 0.9919 | 0.0389 |
| CYP19A1    | 0.9040 | 1.0981 | 1.0153 | 0.9503 | 0.9919 | 0.0421 |
| CASRL1     | 0.9693 | 1.0176 | 1.0307 | 0.9500 | 0.9919 | 0.0192 |
| ZNF148     | 0.7838 | 1.5526 | 0.9817 | 0.6496 | 0.9919 | 0.1990 |
| CCL2       | 0.9222 | 1.1157 | 1.0664 | 0.8634 | 0.9919 | 0.0593 |
| LOC729040  | 0.9874 | 1.0842 | 0.9240 | 0.9721 | 0.9919 | 0.0336 |
| OLFM2      | 1.0031 | 1.0557 | 1.0542 | 0.8548 | 0.9919 | 0.0473 |
| LIM2       | 0.9934 | 1.1963 | 0.9882 | 0.7898 | 0.9919 | 0.0830 |
| LOC728022  | 0.9470 | 1.1301 | 0.9782 | 0.9125 | 0.9919 | 0.0480 |
| FRMPD2     | 0.9785 | 1.0052 | 1.0679 | 0.9163 | 0.9919 | 0.0314 |
| AKAP4      | 0.9919 | 1.1237 | 1.0055 | 0.8467 | 0.9920 | 0.0567 |
| GHSR       | 0.9252 | 1.0818 | 1.0539 | 0.9070 | 0.9920 | 0.0443 |
| GPR141     | 0.8490 | 1.1086 | 1.0882 | 0.9222 | 0.9920 | 0.0634 |
| SCNN1D     | 0.9022 | 1.2515 | 0.9228 | 0.8913 | 0.9920 | 0.0868 |
| LOC1001290 | 0.9009 | 1.1238 | 1.0278 | 0.9155 | 0.9920 | 0.0523 |
| LOC646960  | 1.0323 | 1.0085 | 1.0317 | 0.8954 | 0.9920 | 0.0327 |
| FLJ46838   | 0.8710 | 1.0180 | 1.1355 | 0.9436 | 0.9920 | 0.0565 |
| LOC645307  | 0.8911 | 1.0702 | 1.1079 | 0.8988 | 0.9920 | 0.0566 |
| MLX        | 0.9300 | 1.4306 | 0.8961 | 0.7112 | 0.9920 | 0.1539 |
| LOC1001328 | 0.9997 | 1.0233 | 0.9630 | 0.9820 | 0.9920 | 0.0128 |
| LOC648245  | 0.9608 | 1.1606 | 0.9801 | 0.8664 | 0.9920 | 0.0615 |

|             |        |        |        |        |        |        |
|-------------|--------|--------|--------|--------|--------|--------|
| LOC1001280  | 0.9574 | 1.0996 | 1.0040 | 0.9069 | 0.9920 | 0.0410 |
| LOC643734   | 0.9768 | 1.1120 | 0.9962 | 0.8830 | 0.9920 | 0.0470 |
| ZNF253      | 0.9831 | 1.0989 | 0.9806 | 0.9054 | 0.9920 | 0.0399 |
| LOC1001319  | 0.8848 | 1.0858 | 1.0310 | 0.9664 | 0.9920 | 0.0433 |
| ERCC-00031  | 0.9228 | 1.0974 | 1.0207 | 0.9273 | 0.9920 | 0.0418 |
| HPYR1       | 1.0636 | 1.0878 | 1.0002 | 0.8164 | 0.9920 | 0.0614 |
| LOC731969   | 0.8917 | 1.1364 | 0.9575 | 0.9826 | 0.9920 | 0.0518 |
| LOC1001282  | 0.9044 | 1.1474 | 0.9706 | 0.9458 | 0.9920 | 0.0535 |
| SNORA51     | 0.9688 | 1.0490 | 1.0393 | 0.9111 | 0.9920 | 0.0324 |
| DMKN        | 0.9630 | 1.0140 | 1.0555 | 0.9356 | 0.9920 | 0.0267 |
| LOC1001289  | 0.8746 | 1.0350 | 1.0846 | 0.9739 | 0.9921 | 0.0452 |
| PAOX        | 0.8867 | 1.1645 | 1.0573 | 0.8597 | 0.9921 | 0.0722 |
| LOC648718   | 1.0035 | 1.0434 | 1.1477 | 0.7736 | 0.9921 | 0.0789 |
| KIAA0317    | 0.9203 | 1.0911 | 0.9942 | 0.9627 | 0.9921 | 0.0363 |
| LOC1001281  | 0.8864 | 1.2022 | 1.1105 | 0.7690 | 0.9921 | 0.0996 |
| LYRM1       | 0.9304 | 1.4241 | 0.9554 | 0.6583 | 0.9921 | 0.1590 |
| LOC1001295  | 0.9269 | 1.0291 | 1.1166 | 0.8957 | 0.9921 | 0.0503 |
| CSF3R       | 0.9030 | 1.0809 | 1.0628 | 0.9215 | 0.9921 | 0.0464 |
| VENTXP1     | 0.9489 | 1.1131 | 1.0272 | 0.8792 | 0.9921 | 0.0504 |
| LOC652533   | 1.0094 | 1.1301 | 0.9907 | 0.8380 | 0.9921 | 0.0599 |
| NMNAT3      | 0.8852 | 1.2053 | 1.0375 | 0.8402 | 0.9921 | 0.0827 |
| ZNF90       | 0.9537 | 1.1744 | 0.9525 | 0.8876 | 0.9921 | 0.0627 |
| MIR617      | 0.8130 | 1.0970 | 1.0977 | 0.9606 | 0.9921 | 0.0678 |
| PREX1       | 0.8972 | 1.1346 | 1.0373 | 0.8992 | 0.9921 | 0.0577 |
| LOC729065   | 0.9812 | 1.1841 | 0.9731 | 0.8300 | 0.9921 | 0.0728 |
| LOC1001337  | 0.8828 | 1.0781 | 1.1519 | 0.8555 | 0.9921 | 0.0728 |
| SNORD66     | 0.9775 | 1.0977 | 1.0134 | 0.8798 | 0.9921 | 0.0451 |
| LPAR5       | 1.0353 | 0.9557 | 0.9998 | 0.9775 | 0.9921 | 0.0170 |
| ADAMTS2     | 0.9666 | 1.0597 | 1.0060 | 0.9360 | 0.9921 | 0.0267 |
| DYNC2LI1    | 0.9280 | 1.2942 | 0.9138 | 0.8325 | 0.9921 | 0.1029 |
| EFCAB7      | 0.9344 | 1.1737 | 1.0739 | 0.7864 | 0.9921 | 0.0843 |
| LOC1001283  | 0.9502 | 1.0789 | 0.9414 | 0.9979 | 0.9921 | 0.0315 |
| LOC729501   | 0.9810 | 1.0543 | 1.0278 | 0.9054 | 0.9921 | 0.0327 |
| DKFZp434I1C | 1.0302 | 1.1230 | 1.0128 | 0.8024 | 0.9921 | 0.0677 |
| YIPF4       | 0.9250 | 1.1309 | 1.1478 | 0.7648 | 0.9921 | 0.0911 |
| BARHL1      | 0.8430 | 1.1876 | 1.0316 | 0.9062 | 0.9921 | 0.0760 |
| CFH         | 0.9438 | 1.1048 | 1.0182 | 0.9017 | 0.9921 | 0.0446 |
| IL4         | 0.9728 | 1.0426 | 1.0413 | 0.9118 | 0.9921 | 0.0313 |
| NBPF7       | 0.9762 | 1.0949 | 0.9939 | 0.9035 | 0.9921 | 0.0394 |
| MIR320B1    | 0.9532 | 1.0347 | 0.9863 | 0.9944 | 0.9921 | 0.0168 |
| LOC649661   | 0.8668 | 1.1978 | 1.0750 | 0.8289 | 0.9921 | 0.0873 |
| LOC642656   | 0.9536 | 1.0753 | 1.0249 | 0.9148 | 0.9921 | 0.0359 |
| NCRNA00093  | 1.0024 | 1.0537 | 1.0147 | 0.8977 | 0.9921 | 0.0333 |
| MMP23B      | 0.8570 | 1.0739 | 1.0988 | 0.9389 | 0.9921 | 0.0571 |
| LOC389748   | 0.9561 | 1.0300 | 1.0571 | 0.9253 | 0.9921 | 0.0309 |
| LOC1001312  | 0.9662 | 1.1054 | 1.0493 | 0.8477 | 0.9921 | 0.0560 |

|            |        |        |        |        |        |        |
|------------|--------|--------|--------|--------|--------|--------|
| LOC643369  | 1.0250 | 1.0298 | 1.0046 | 0.9092 | 0.9922 | 0.0282 |
| EZH1       | 0.9514 | 1.1750 | 0.9723 | 0.8700 | 0.9922 | 0.0648 |
| FRMPD2L2   | 0.9299 | 1.0834 | 1.0115 | 0.9439 | 0.9922 | 0.0352 |
| ASAH2      | 0.9859 | 1.1212 | 0.9462 | 0.9154 | 0.9922 | 0.0454 |
| LOC1001285 | 0.9214 | 1.1528 | 1.0437 | 0.8508 | 0.9922 | 0.0667 |
| LRRN4      | 0.9260 | 1.0626 | 1.0208 | 0.9594 | 0.9922 | 0.0306 |
| FBP2       | 0.9040 | 1.0480 | 1.0015 | 1.0152 | 0.9922 | 0.0310 |
| FLJ45537   | 0.9860 | 1.1213 | 0.9430 | 0.9184 | 0.9922 | 0.0452 |
| SRA1       | 0.9786 | 1.2399 | 0.9610 | 0.7892 | 0.9922 | 0.0930 |
| VNN3       | 0.9519 | 1.0529 | 1.0585 | 0.9054 | 0.9922 | 0.0379 |
| MED18      | 0.9493 | 1.0446 | 1.1521 | 0.8228 | 0.9922 | 0.0700 |
| CAPN11     | 0.8486 | 1.0816 | 1.0316 | 1.0070 | 0.9922 | 0.0503 |
| LOC644168  | 0.9638 | 1.2516 | 0.9060 | 0.8475 | 0.9922 | 0.0896 |
| LOC1001308 | 0.9065 | 1.0185 | 1.0471 | 0.9968 | 0.9922 | 0.0304 |
| FCHSD1     | 0.9199 | 1.1104 | 1.0752 | 0.8634 | 0.9922 | 0.0596 |
| SAA4       | 0.8916 | 1.0324 | 1.0405 | 1.0043 | 0.9922 | 0.0344 |
| LOC390414  | 1.0240 | 0.9611 | 1.0319 | 0.9519 | 0.9922 | 0.0208 |
| PRSS38     | 0.9666 | 1.0702 | 1.0235 | 0.9087 | 0.9922 | 0.0350 |
| LOC341689  | 0.9811 | 1.0446 | 1.0542 | 0.8890 | 0.9922 | 0.0380 |
| OR5M8      | 0.9725 | 1.0501 | 0.9997 | 0.9466 | 0.9922 | 0.0221 |
| FRZB       | 0.9570 | 1.0943 | 1.0163 | 0.9013 | 0.9922 | 0.0413 |
| BCL11A     | 0.9146 | 1.0995 | 1.0121 | 0.9428 | 0.9922 | 0.0412 |
| ITK        | 0.8985 | 1.0684 | 1.0555 | 0.9466 | 0.9922 | 0.0415 |
| TGIF2LX    | 0.8771 | 1.1171 | 1.0852 | 0.8896 | 0.9922 | 0.0633 |
| ZC3H7B     | 0.8981 | 1.2069 | 0.9697 | 0.8942 | 0.9922 | 0.0736 |
| MIR604     | 0.8064 | 1.1937 | 1.0470 | 0.9219 | 0.9923 | 0.0832 |
| FDPSL2A    | 0.8951 | 1.1111 | 0.9069 | 1.0559 | 0.9923 | 0.0539 |
| FLJ38379   | 0.9601 | 1.0412 | 1.0121 | 0.9557 | 0.9923 | 0.0207 |
| AGFG2      | 0.9084 | 1.2610 | 1.0160 | 0.7837 | 0.9923 | 0.1014 |
| TRIP11     | 1.0424 | 1.3338 | 0.8349 | 0.7580 | 0.9923 | 0.1287 |
| LOC729919  | 0.9041 | 1.1232 | 1.0267 | 0.9150 | 0.9923 | 0.0517 |
| LOC392713  | 0.9308 | 1.1101 | 0.9970 | 0.9313 | 0.9923 | 0.0422 |
| C1orf49    | 0.9898 | 1.1047 | 0.9344 | 0.9402 | 0.9923 | 0.0395 |
| SF1        | 0.9467 | 1.0427 | 1.1264 | 0.8533 | 0.9923 | 0.0591 |
| LOC653667  | 0.9425 | 1.0501 | 1.0492 | 0.9273 | 0.9923 | 0.0333 |
| PCSK2      | 1.0099 | 1.0624 | 0.9636 | 0.9332 | 0.9923 | 0.0282 |
| FLJ30851   | 0.9974 | 1.0563 | 0.9866 | 0.9288 | 0.9923 | 0.0261 |
| LOC1001317 | 1.0058 | 1.0107 | 1.1168 | 0.8359 | 0.9923 | 0.0581 |
| LOC731102  | 1.0502 | 0.9625 | 0.9977 | 0.9588 | 0.9923 | 0.0212 |
| ADC        | 0.9667 | 1.1791 | 0.8798 | 0.9436 | 0.9923 | 0.0649 |
| OR10G8     | 0.9252 | 1.0077 | 1.0779 | 0.9583 | 0.9923 | 0.0332 |
| SLC22A14   | 0.9808 | 1.0602 | 0.9159 | 1.0123 | 0.9923 | 0.0302 |
| HELT       | 0.9271 | 1.1534 | 1.0527 | 0.8360 | 0.9923 | 0.0697 |
| SIGLEC16   | 0.8890 | 1.1107 | 1.0599 | 0.9096 | 0.9923 | 0.0549 |
| LOC1001304 | 0.9403 | 1.1438 | 0.9554 | 0.9298 | 0.9923 | 0.0508 |
| LOC646799  | 0.9807 | 1.0396 | 1.0714 | 0.8775 | 0.9923 | 0.0426 |



|            |        |        |        |        |        |        |
|------------|--------|--------|--------|--------|--------|--------|
| HERPUD2    | 0.9080 | 1.1534 | 1.0787 | 0.8292 | 0.9923 | 0.0748 |
| THNSL2     | 0.9948 | 1.2766 | 1.0204 | 0.6775 | 0.9923 | 0.1227 |
| MASP1      | 0.9872 | 1.0267 | 1.0898 | 0.8656 | 0.9923 | 0.0472 |
| SPRED2     | 0.9287 | 1.1204 | 1.0447 | 0.8756 | 0.9923 | 0.0554 |
| LOC1001293 | 0.9319 | 1.0716 | 1.0021 | 0.9637 | 0.9923 | 0.0301 |
| COPB2      | 0.8302 | 1.3974 | 0.9764 | 0.7654 | 0.9923 | 0.1420 |
| LOC642293  | 0.9599 | 1.1209 | 0.9046 | 0.9840 | 0.9923 | 0.0460 |
| C11orf80   | 0.9157 | 1.3620 | 0.9662 | 0.7256 | 0.9924 | 0.1337 |
| B3GALT5    | 0.9474 | 1.0680 | 1.0028 | 0.9513 | 0.9924 | 0.0282 |
| PLG        | 0.9089 | 1.1316 | 1.0622 | 0.8666 | 0.9924 | 0.0626 |
| LOC1001344 | 0.9014 | 1.1974 | 0.9970 | 0.8736 | 0.9924 | 0.0733 |
| LOC650749  | 0.9107 | 1.1351 | 1.0327 | 0.8910 | 0.9924 | 0.0570 |
| WWTR1      | 0.8721 | 1.1141 | 1.0613 | 0.9220 | 0.9924 | 0.0570 |
| LOC651619  | 0.9887 | 1.2401 | 0.9132 | 0.8275 | 0.9924 | 0.0889 |
| NACAD      | 0.9337 | 1.1424 | 1.0385 | 0.8548 | 0.9924 | 0.0626 |
| GNG2       | 0.9103 | 1.0526 | 1.0572 | 0.9494 | 0.9924 | 0.0370 |
| FAM23A     | 1.0353 | 1.0048 | 0.9773 | 0.9520 | 0.9924 | 0.0179 |
| LOC645626  | 0.9059 | 1.0834 | 1.0346 | 0.9456 | 0.9924 | 0.0406 |
| LOC1001288 | 0.9138 | 1.1399 | 1.0336 | 0.8823 | 0.9924 | 0.0590 |
| LOC644386  | 1.0137 | 1.0226 | 1.0392 | 0.8940 | 0.9924 | 0.0332 |
| LOC1001342 | 0.9134 | 1.1336 | 0.9798 | 0.9428 | 0.9924 | 0.0490 |
| LOC342994  | 0.9359 | 1.0575 | 1.0602 | 0.9161 | 0.9924 | 0.0386 |
| LOC646383  | 0.8821 | 1.1342 | 1.0510 | 0.9023 | 0.9924 | 0.0604 |
| OR11A1     | 0.9644 | 1.0520 | 0.9675 | 0.9857 | 0.9924 | 0.0204 |
| LOC646498  | 0.9531 | 1.0742 | 1.0391 | 0.9033 | 0.9924 | 0.0391 |
| WDR3       | 0.9860 | 1.0007 | 1.0752 | 0.9077 | 0.9924 | 0.0343 |
| LDHAL6A    | 0.7665 | 1.2537 | 0.9681 | 0.9813 | 0.9924 | 0.1000 |
| TAAR9      | 0.9676 | 1.0655 | 1.0279 | 0.9087 | 0.9924 | 0.0344 |
| ARHGEF6    | 0.9906 | 1.1330 | 1.0033 | 0.8427 | 0.9924 | 0.0594 |
| KRTAP21-2  | 1.0135 | 0.9858 | 1.0826 | 0.8878 | 0.9924 | 0.0404 |
| LOC651723  | 1.0448 | 1.0267 | 0.9152 | 0.9830 | 0.9924 | 0.0288 |
| LOC88523   | 0.8509 | 1.3743 | 0.9763 | 0.7682 | 0.9924 | 0.1343 |
| LOC285074  | 0.9249 | 1.3723 | 0.8847 | 0.7878 | 0.9924 | 0.1299 |
| ZDHHC14    | 0.8766 | 1.2588 | 1.0992 | 0.7351 | 0.9924 | 0.1162 |
| LOC643368  | 0.9149 | 1.1813 | 1.0088 | 0.8648 | 0.9924 | 0.0697 |
| LOC728539  | 0.9610 | 1.0209 | 1.0432 | 0.9447 | 0.9924 | 0.0236 |
| ZAP70      | 1.0005 | 1.0127 | 0.9474 | 1.0092 | 0.9924 | 0.0152 |
| LOC647190  | 0.9082 | 1.2301 | 1.0078 | 0.8238 | 0.9924 | 0.0877 |
| DKFZP564C1 | 0.8921 | 1.1360 | 0.9947 | 0.9469 | 0.9925 | 0.0522 |
| DKFZp686A1 | 0.9791 | 0.9721 | 1.0966 | 0.9220 | 0.9925 | 0.0370 |
| SNX22      | 0.8569 | 1.1696 | 1.2858 | 0.6575 | 0.9925 | 0.1438 |
| PRG3       | 0.9928 | 1.0935 | 0.9726 | 0.9109 | 0.9925 | 0.0379 |
| CNTN5      | 0.9549 | 1.0627 | 1.1004 | 0.8518 | 0.9925 | 0.0561 |
| WWP1       | 0.8586 | 1.4184 | 1.0647 | 0.6281 | 0.9925 | 0.1677 |
| MIR1203    | 0.9634 | 1.0506 | 1.0065 | 0.9493 | 0.9925 | 0.0229 |
| BAIAP2     | 1.0316 | 1.1839 | 1.0214 | 0.7330 | 0.9925 | 0.0941 |

|            |        |        |        |        |        |        |
|------------|--------|--------|--------|--------|--------|--------|
| LOC441018  | 0.9911 | 1.0987 | 0.9620 | 0.9181 | 0.9925 | 0.0384 |
| C4orf11    | 1.0025 | 1.0858 | 1.0933 | 0.7884 | 0.9925 | 0.0711 |
| RUNDC3B    | 0.9001 | 1.0107 | 1.1121 | 0.9471 | 0.9925 | 0.0459 |
| CCDC36     | 0.9185 | 1.1954 | 1.0353 | 0.8208 | 0.9925 | 0.0806 |
| SLC7A14    | 0.9826 | 0.9639 | 1.1033 | 0.9202 | 0.9925 | 0.0392 |
| MIR585     | 0.8825 | 1.1847 | 0.9921 | 0.9107 | 0.9925 | 0.0682 |
| INA        | 0.9638 | 1.1532 | 0.9793 | 0.8738 | 0.9925 | 0.0584 |
| LOC650796  | 0.8212 | 1.1950 | 1.1128 | 0.8410 | 0.9925 | 0.0948 |
| LOC1001322 | 0.9786 | 1.0041 | 1.0873 | 0.9000 | 0.9925 | 0.0386 |
| LOC653526  | 0.9666 | 1.1061 | 1.0149 | 0.8826 | 0.9925 | 0.0467 |
| LOC442381  | 0.9962 | 1.0834 | 0.9547 | 0.9359 | 0.9925 | 0.0328 |
| OR10G7     | 0.9337 | 1.0754 | 1.0075 | 0.9536 | 0.9925 | 0.0317 |
| COX11P     | 0.8790 | 1.2470 | 0.9682 | 0.8761 | 0.9925 | 0.0875 |
| LOC1001309 | 0.8556 | 1.2010 | 1.0267 | 0.8869 | 0.9925 | 0.0788 |
| SLC10A2    | 0.9438 | 1.0373 | 1.0586 | 0.9305 | 0.9926 | 0.0324 |
| LOC401280  | 0.8972 | 1.2029 | 0.9645 | 0.9056 | 0.9926 | 0.0717 |
| LOC440041  | 0.9026 | 1.1457 | 1.0222 | 0.8997 | 0.9926 | 0.0585 |
| KCNQ1DN    | 0.9760 | 1.0494 | 0.9856 | 0.9593 | 0.9926 | 0.0197 |
| PLA2G4E    | 1.0099 | 1.0373 | 1.0466 | 0.8764 | 0.9926 | 0.0395 |
| C17orf85   | 0.8269 | 1.3545 | 1.0014 | 0.7875 | 0.9926 | 0.1293 |
| LOC155060  | 1.0217 | 1.0639 | 0.9840 | 0.9006 | 0.9926 | 0.0347 |
| DGCR9      | 0.9061 | 1.1360 | 0.9836 | 0.9447 | 0.9926 | 0.0503 |
| OR4D10     | 0.9905 | 1.0362 | 1.0018 | 0.9419 | 0.9926 | 0.0195 |
| LOC641908  | 0.9473 | 1.1772 | 0.8933 | 0.9525 | 0.9926 | 0.0630 |
| OR2H1      | 0.9485 | 1.1303 | 1.0234 | 0.8682 | 0.9926 | 0.0558 |
| LOC651872  | 0.9532 | 1.0772 | 1.0664 | 0.8736 | 0.9926 | 0.0486 |
| LOC644092  | 0.9405 | 1.0610 | 1.0269 | 0.9420 | 0.9926 | 0.0305 |
| AAA1       | 0.9406 | 1.0594 | 1.0345 | 0.9358 | 0.9926 | 0.0318 |
| PSG9       | 0.9280 | 1.1965 | 0.9174 | 0.9285 | 0.9926 | 0.0680 |
| CHIT1      | 1.0090 | 0.9923 | 0.9983 | 0.9708 | 0.9926 | 0.0080 |
| C12orf59   | 0.9523 | 1.0107 | 1.1697 | 0.8377 | 0.9926 | 0.0691 |
| ARTN       | 0.9470 | 1.1296 | 1.0214 | 0.8724 | 0.9926 | 0.0549 |
| LOC728212  | 1.1105 | 1.0861 | 0.8899 | 0.8840 | 0.9926 | 0.0612 |
| CA5BP      | 0.9897 | 1.1518 | 0.9313 | 0.8976 | 0.9926 | 0.0564 |
| FLJ33708   | 0.9740 | 1.0007 | 1.0766 | 0.9193 | 0.9926 | 0.0327 |
| RAB19      | 0.9194 | 1.1127 | 0.9810 | 0.9573 | 0.9926 | 0.0420 |
| C10orf64   | 0.9985 | 0.9861 | 1.0491 | 0.9367 | 0.9926 | 0.0231 |
| TAS1R3     | 0.9625 | 1.1156 | 1.0552 | 0.8372 | 0.9926 | 0.0606 |
| LOC649185  | 0.8951 | 1.0836 | 1.0778 | 0.9140 | 0.9926 | 0.0510 |
| TMEM132D   | 0.9699 | 1.1364 | 0.9655 | 0.8987 | 0.9926 | 0.0506 |
| DPYS       | 0.9813 | 1.0444 | 1.0280 | 0.9168 | 0.9926 | 0.0286 |
| LOC643841  | 0.9353 | 1.0564 | 1.0736 | 0.9053 | 0.9926 | 0.0424 |
| RAB37      | 0.9704 | 1.0804 | 1.0299 | 0.8899 | 0.9926 | 0.0410 |
| MEI1       | 0.9502 | 1.1381 | 1.0031 | 0.8792 | 0.9927 | 0.0547 |
| GRIA4      | 0.9084 | 1.1084 | 1.0643 | 0.8894 | 0.9927 | 0.0550 |
| GPR148     | 0.9842 | 1.0771 | 1.0046 | 0.9046 | 0.9927 | 0.0355 |

|            |        |        |        |        |        |        |
|------------|--------|--------|--------|--------|--------|--------|
| OASL       | 0.9758 | 1.0928 | 1.0224 | 0.8796 | 0.9927 | 0.0447 |
| APOF       | 1.1146 | 1.0198 | 1.0746 | 0.7616 | 0.9927 | 0.0794 |
| CDC42EP5   | 1.0042 | 0.9704 | 1.0140 | 0.9821 | 0.9927 | 0.0100 |
| C1orf75    | 0.8961 | 1.1393 | 1.0739 | 0.8614 | 0.9927 | 0.0675 |
| ACSBG2     | 0.9729 | 1.0800 | 1.0009 | 0.9169 | 0.9927 | 0.0340 |
| TYW1       | 0.9370 | 1.4481 | 0.9432 | 0.6425 | 0.9927 | 0.1672 |
| HIST1H2AH  | 0.9428 | 1.1318 | 1.0030 | 0.8932 | 0.9927 | 0.0515 |
| MAT1A      | 0.8897 | 1.0116 | 1.1505 | 0.9189 | 0.9927 | 0.0587 |
| LOC284296  | 0.9545 | 1.1476 | 0.9748 | 0.8938 | 0.9927 | 0.0544 |
| LOC284861  | 0.9321 | 1.0272 | 1.0819 | 0.9296 | 0.9927 | 0.0374 |
| B4GALNT3   | 0.9024 | 1.2091 | 0.9914 | 0.8679 | 0.9927 | 0.0767 |
| LOC650794  | 0.9345 | 1.1054 | 1.0350 | 0.8959 | 0.9927 | 0.0477 |
| ORMDL2     | 0.9569 | 1.1937 | 1.1197 | 0.7006 | 0.9927 | 0.1092 |
| NEUROD4    | 0.9611 | 1.0198 | 1.0044 | 0.9855 | 0.9927 | 0.0127 |
| PRM1       | 0.8950 | 1.1318 | 1.0082 | 0.9359 | 0.9927 | 0.0519 |
| DRD4       | 0.9579 | 1.1443 | 1.0393 | 0.8294 | 0.9927 | 0.0665 |
| TMPRSS11B  | 0.7944 | 1.0258 | 1.1402 | 1.0104 | 0.9927 | 0.0722 |
| LOC1001283 | 0.9656 | 0.9843 | 1.0508 | 0.9702 | 0.9927 | 0.0198 |
| TTY19      | 0.9261 | 1.0852 | 1.0367 | 0.9230 | 0.9927 | 0.0406 |
| OR6K2      | 0.9824 | 1.1229 | 0.9339 | 0.9317 | 0.9927 | 0.0449 |
| ANKH       | 0.8998 | 1.1095 | 0.9824 | 0.9793 | 0.9927 | 0.0433 |
| C2orf83    | 0.9596 | 1.0671 | 1.0302 | 0.9140 | 0.9927 | 0.0344 |
| KRTAP6-3   | 1.0033 | 1.0491 | 1.0122 | 0.9064 | 0.9927 | 0.0304 |
| LOC1001330 | 0.9510 | 1.0153 | 1.1156 | 0.8891 | 0.9928 | 0.0484 |
| VAC14      | 0.9696 | 1.1045 | 1.0376 | 0.8594 | 0.9928 | 0.0523 |
| RTL1       | 0.9324 | 1.0037 | 1.0319 | 1.0030 | 0.9928 | 0.0212 |
| LOC644299  | 0.8447 | 1.0742 | 1.0967 | 0.9555 | 0.9928 | 0.0583 |
| IFI27L2    | 0.8550 | 1.1681 | 1.0771 | 0.8709 | 0.9928 | 0.0773 |
| MGC12760   | 0.9255 | 1.0984 | 1.0547 | 0.8926 | 0.9928 | 0.0496 |
| LOC651381  | 1.0017 | 1.0251 | 1.0107 | 0.9338 | 0.9928 | 0.0203 |
| BCL2L10    | 0.9438 | 1.0335 | 1.0912 | 0.9027 | 0.9928 | 0.0427 |
| KIAA1648   | 0.9080 | 1.0360 | 1.0069 | 1.0204 | 0.9928 | 0.0289 |
| MIR1274A   | 1.0669 | 1.0371 | 0.9809 | 0.8864 | 0.9928 | 0.0397 |
| MIR890     | 0.9275 | 1.0884 | 0.9843 | 0.9711 | 0.9928 | 0.0341 |
| LOC653883  | 0.9044 | 1.1528 | 1.0212 | 0.8930 | 0.9928 | 0.0607 |
| KIAA0284   | 0.8794 | 1.2407 | 0.9797 | 0.8716 | 0.9928 | 0.0862 |
| TRPC2      | 0.9153 | 1.1159 | 1.0441 | 0.8961 | 0.9928 | 0.0526 |
| RFX2       | 0.9861 | 1.0937 | 1.0041 | 0.8874 | 0.9928 | 0.0423 |
| C6orf94    | 0.9658 | 1.0162 | 1.0182 | 0.9711 | 0.9928 | 0.0141 |
| LOC644907  | 0.7661 | 1.2352 | 1.3541 | 0.6161 | 0.9929 | 0.1786 |
| GVIN1      | 0.9190 | 1.1230 | 0.9569 | 0.9725 | 0.9929 | 0.0448 |
| NME2P1     | 0.9126 | 1.1701 | 1.0242 | 0.8645 | 0.9929 | 0.0679 |
| LOC1001311 | 0.9983 | 1.0415 | 1.1219 | 0.8097 | 0.9929 | 0.0662 |
| PXT1       | 0.9458 | 1.1407 | 0.9805 | 0.9045 | 0.9929 | 0.0517 |
| MMP15      | 0.9530 | 1.2938 | 0.9354 | 0.7893 | 0.9929 | 0.1068 |
| DENND1B    | 0.9216 | 1.0738 | 1.0426 | 0.9336 | 0.9929 | 0.0383 |

|            |        |        |        |        |        |        |
|------------|--------|--------|--------|--------|--------|--------|
| SCXB       | 1.0166 | 1.0413 | 1.0208 | 0.8929 | 0.9929 | 0.0338 |
| LOC1001299 | 0.9822 | 1.0535 | 1.0313 | 0.9045 | 0.9929 | 0.0330 |
| LOC646862  | 0.9458 | 1.1380 | 0.9955 | 0.8923 | 0.9929 | 0.0527 |
| LOC644949  | 1.0078 | 1.0131 | 0.9935 | 0.9572 | 0.9929 | 0.0126 |
| LOC651952  | 0.8709 | 1.1386 | 1.0163 | 0.9458 | 0.9929 | 0.0569 |
| LOC728683  | 0.8903 | 1.0687 | 1.1135 | 0.8991 | 0.9929 | 0.0575 |
| NCRNA00152 | 0.9341 | 1.0792 | 1.0592 | 0.8992 | 0.9929 | 0.0448 |
| AGPAT4     | 0.9808 | 1.0232 | 1.0368 | 0.9309 | 0.9929 | 0.0239 |
| LOC441771  | 1.0008 | 1.0575 | 0.9369 | 0.9764 | 0.9929 | 0.0252 |
| CD300A     | 0.9802 | 1.0359 | 1.0761 | 0.8794 | 0.9929 | 0.0426 |
| PROZ       | 0.9486 | 1.0701 | 1.0690 | 0.8839 | 0.9929 | 0.0462 |
| LOC387895  | 0.9017 | 1.0326 | 1.1711 | 0.8663 | 0.9929 | 0.0693 |
| POTED      | 1.0421 | 1.0087 | 0.9749 | 0.9461 | 0.9929 | 0.0208 |
| HHIP       | 0.9146 | 1.0368 | 1.0347 | 0.9856 | 0.9929 | 0.0287 |
| LOC131691  | 0.9498 | 1.1185 | 0.9639 | 0.9395 | 0.9929 | 0.0421 |
| IL12B      | 0.9246 | 1.1336 | 0.9783 | 0.9353 | 0.9929 | 0.0483 |
| ELMO3      | 0.9516 | 1.2753 | 0.8780 | 0.8669 | 0.9929 | 0.0960 |
| LOC729284  | 0.8019 | 1.1680 | 1.0620 | 0.9399 | 0.9930 | 0.0789 |
| PCDH21     | 0.8103 | 1.1483 | 1.1021 | 0.9111 | 0.9930 | 0.0796 |
| RNU105B    | 0.9232 | 1.1763 | 1.0059 | 0.8664 | 0.9930 | 0.0675 |
| FAM22A     | 0.9513 | 1.0706 | 1.0140 | 0.9359 | 0.9930 | 0.0309 |
| LOC401206  | 0.9107 | 1.0539 | 1.1108 | 0.8964 | 0.9930 | 0.0530 |
| LOC400796  | 0.9237 | 1.1208 | 1.0237 | 0.9037 | 0.9930 | 0.0500 |
| KRT77      | 1.0615 | 1.0800 | 0.9311 | 0.8994 | 0.9930 | 0.0455 |
| TULP1      | 0.9949 | 0.9955 | 1.0435 | 0.9381 | 0.9930 | 0.0216 |
| FKSG29     | 1.0186 | 1.0717 | 0.9822 | 0.8995 | 0.9930 | 0.0362 |
| SCML4      | 0.9926 | 1.0966 | 0.9136 | 0.9692 | 0.9930 | 0.0383 |
| EGFLAM     | 0.9987 | 1.0466 | 0.9753 | 0.9514 | 0.9930 | 0.0203 |
| TEDDM1     | 0.9625 | 1.0862 | 1.0126 | 0.9107 | 0.9930 | 0.0374 |
| C3orf49    | 1.0206 | 1.0235 | 0.9967 | 0.9312 | 0.9930 | 0.0215 |
| LOC121981  | 0.9911 | 1.0865 | 1.0770 | 0.8174 | 0.9930 | 0.0624 |
| SLCO1A2    | 0.9803 | 1.0837 | 1.0237 | 0.8844 | 0.9930 | 0.0419 |
| LOC440297  | 0.8169 | 1.0528 | 1.1394 | 0.9629 | 0.9930 | 0.0689 |
| DUX4       | 0.9081 | 1.0815 | 1.0966 | 0.8857 | 0.9930 | 0.0557 |
| LOC644183  | 0.8855 | 1.1416 | 1.0603 | 0.8848 | 0.9930 | 0.0645 |
| LOC652637  | 0.9776 | 0.9109 | 1.1315 | 0.9521 | 0.9930 | 0.0482 |
| SLC35E1    | 0.9679 | 1.2027 | 1.0600 | 0.7416 | 0.9930 | 0.0967 |
| C6orf78    | 0.9595 | 1.1170 | 0.9771 | 0.9186 | 0.9930 | 0.0431 |
| LOC285016  | 1.0272 | 1.0026 | 1.0004 | 0.9419 | 0.9930 | 0.0181 |
| LOC641819  | 0.9182 | 1.1398 | 1.0308 | 0.8833 | 0.9930 | 0.0582 |
| LOC341651  | 0.9726 | 1.0377 | 1.0089 | 0.9529 | 0.9930 | 0.0189 |
| SPATA5     | 0.9527 | 1.0316 | 1.0580 | 0.9298 | 0.9930 | 0.0307 |
| CD40       | 0.9313 | 1.0657 | 1.0482 | 0.9270 | 0.9930 | 0.0371 |
| SNORD116-4 | 0.9360 | 1.0252 | 1.0696 | 0.9414 | 0.9930 | 0.0327 |
| RPPH1      | 0.9270 | 1.0135 | 1.0932 | 0.9385 | 0.9931 | 0.0385 |
| LRRRC8D    | 0.9006 | 1.3791 | 0.9439 | 0.7485 | 0.9931 | 0.1353 |

|            |        |        |        |        |        |        |
|------------|--------|--------|--------|--------|--------|--------|
| LOC642626  | 0.8838 | 1.0907 | 0.9925 | 1.0053 | 0.9931 | 0.0424 |
| PRY        | 0.8176 | 1.0685 | 1.1079 | 0.9783 | 0.9931 | 0.0645 |
| SRD5A2L2   | 0.9594 | 1.1020 | 1.0270 | 0.8839 | 0.9931 | 0.0466 |
| PLAG1      | 0.9418 | 1.0769 | 1.0370 | 0.9167 | 0.9931 | 0.0381 |
| KCTD16     | 1.0107 | 1.0094 | 1.0477 | 0.9045 | 0.9931 | 0.0308 |
| LOC1001316 | 0.8918 | 1.1160 | 1.1084 | 0.8561 | 0.9931 | 0.0692 |
| LOC647881  | 0.9653 | 1.1288 | 0.9767 | 0.9015 | 0.9931 | 0.0482 |
| LOC646106  | 0.9759 | 1.1500 | 0.9016 | 0.9449 | 0.9931 | 0.0545 |
| PMS2L11    | 0.9694 | 1.1631 | 0.9745 | 0.8654 | 0.9931 | 0.0620 |
| LOC642785  | 0.9286 | 1.2028 | 0.9367 | 0.9043 | 0.9931 | 0.0702 |
| GTPBP2     | 0.9827 | 1.1236 | 1.0475 | 0.8185 | 0.9931 | 0.0649 |
| GLIPR1L2   | 0.9304 | 1.0058 | 1.0520 | 0.9843 | 0.9931 | 0.0252 |
| MIR367     | 0.8850 | 1.1283 | 1.0498 | 0.9095 | 0.9931 | 0.0578 |
| GRIA2      | 0.9323 | 0.9627 | 1.1192 | 0.9583 | 0.9931 | 0.0425 |
| LOC647683  | 0.9242 | 1.1445 | 0.9750 | 0.9288 | 0.9931 | 0.0517 |
| LOC254559  | 0.9732 | 1.1063 | 0.9940 | 0.8989 | 0.9931 | 0.0429 |
| LOC1001296 | 1.0345 | 1.0382 | 1.0707 | 0.8292 | 0.9931 | 0.0552 |
| SLCO1C1    | 0.9290 | 1.0154 | 1.0546 | 0.9735 | 0.9931 | 0.0270 |
| LOC644365  | 0.9699 | 1.0593 | 1.0599 | 0.8835 | 0.9931 | 0.0422 |
| SELI       | 0.9040 | 1.3996 | 0.9624 | 0.7065 | 0.9931 | 0.1461 |
| TAL2       | 0.9625 | 1.1788 | 0.9367 | 0.8947 | 0.9932 | 0.0634 |
| TAAR5      | 0.9288 | 1.0378 | 0.9857 | 1.0203 | 0.9932 | 0.0240 |
| CHGB       | 0.9942 | 1.0933 | 1.0003 | 0.8849 | 0.9932 | 0.0426 |
| PIP5K1A    | 0.8849 | 1.1364 | 1.0706 | 0.8808 | 0.9932 | 0.0651 |
| LOC643950  | 0.9707 | 0.9763 | 1.0126 | 1.0131 | 0.9932 | 0.0114 |
| LOC646628  | 0.8587 | 1.2035 | 0.9912 | 0.9193 | 0.9932 | 0.0752 |
| LOC1001307 | 0.9554 | 1.0756 | 1.0403 | 0.9013 | 0.9932 | 0.0397 |
| LOC442162  | 0.9869 | 1.0806 | 1.0802 | 0.8251 | 0.9932 | 0.0602 |
| MYOM2      | 0.9130 | 1.1470 | 1.0397 | 0.8730 | 0.9932 | 0.0624 |
| BCAS1      | 1.0098 | 1.1140 | 0.9854 | 0.8635 | 0.9932 | 0.0514 |
| LOC643272  | 0.9923 | 0.9310 | 1.1095 | 0.9400 | 0.9932 | 0.0410 |
| C10orf30   | 0.9791 | 1.0771 | 0.9808 | 0.9358 | 0.9932 | 0.0298 |
| LOC1001347 | 0.9899 | 1.0431 | 1.0098 | 0.9299 | 0.9932 | 0.0238 |
| LOC646793  | 0.8458 | 1.2514 | 1.0087 | 0.8670 | 0.9932 | 0.0933 |
| ZNF770     | 0.9464 | 1.1778 | 1.0896 | 0.7590 | 0.9932 | 0.0915 |
| GPR137     | 0.9006 | 1.3324 | 0.9794 | 0.7604 | 0.9932 | 0.1218 |
| LOC646916  | 0.8817 | 1.2147 | 1.0100 | 0.8665 | 0.9932 | 0.0805 |
| LOC646279  | 0.8614 | 1.1063 | 1.0448 | 0.9603 | 0.9932 | 0.0532 |
| QTRT1      | 0.9664 | 1.0920 | 1.0410 | 0.8735 | 0.9932 | 0.0475 |
| LOC1001297 | 0.9161 | 1.1652 | 0.9837 | 0.9079 | 0.9932 | 0.0598 |
| OTOG       | 0.9612 | 1.0452 | 1.1373 | 0.8293 | 0.9932 | 0.0654 |
| RHOXF2B    | 0.9176 | 1.1376 | 0.9911 | 0.9267 | 0.9933 | 0.0508 |
| LOC732435  | 0.9897 | 0.9984 | 1.0500 | 0.9349 | 0.9933 | 0.0236 |
| KRTAP26-1  | 0.9422 | 1.0162 | 1.0771 | 0.9375 | 0.9933 | 0.0332 |
| OR4A5      | 0.9219 | 1.1277 | 1.0286 | 0.8949 | 0.9933 | 0.0533 |
| PRAMEF2    | 0.8797 | 1.1357 | 1.0348 | 0.9228 | 0.9933 | 0.0576 |

|            |        |        |        |        |        |        |
|------------|--------|--------|--------|--------|--------|--------|
| BMPER      | 0.9171 | 1.0720 | 1.0855 | 0.8985 | 0.9933 | 0.0496 |
| CATSPER1   | 0.9513 | 1.1156 | 1.0186 | 0.8875 | 0.9933 | 0.0488 |
| FST        | 1.0205 | 1.0059 | 1.0288 | 0.9178 | 0.9933 | 0.0256 |
| LOC392440  | 1.0134 | 1.0486 | 1.1365 | 0.7745 | 0.9933 | 0.0774 |
| LOC732160  | 0.9377 | 1.1644 | 0.9088 | 0.9622 | 0.9933 | 0.0581 |
| SUGT1      | 0.8911 | 1.2046 | 1.0368 | 0.8406 | 0.9933 | 0.0818 |
| AFARP1     | 0.8610 | 1.1320 | 1.0768 | 0.9033 | 0.9933 | 0.0657 |
| DKFZp686D0 | 1.0144 | 1.0918 | 1.0155 | 0.8516 | 0.9933 | 0.0506 |
| LOC440706  | 0.9866 | 1.0800 | 1.0480 | 0.8586 | 0.9933 | 0.0489 |
| GUCY2G     | 0.9207 | 1.1974 | 1.0499 | 0.8051 | 0.9933 | 0.0844 |
| LOC399706  | 0.9053 | 1.1333 | 1.0133 | 0.9214 | 0.9933 | 0.0524 |
| LOC649351  | 1.0072 | 1.1214 | 0.9663 | 0.8784 | 0.9933 | 0.0504 |
| LOC645442  | 1.0131 | 1.1560 | 0.9380 | 0.8662 | 0.9933 | 0.0620 |
| KIAA1239   | 0.8693 | 1.0662 | 1.1192 | 0.9187 | 0.9933 | 0.0592 |
| LOC1001303 | 0.9765 | 1.0382 | 1.0704 | 0.8883 | 0.9933 | 0.0401 |
| LOC1001279 | 1.0180 | 1.0559 | 1.0116 | 0.8878 | 0.9933 | 0.0365 |
| ITIH5L     | 0.9832 | 1.0280 | 1.1601 | 0.8020 | 0.9933 | 0.0740 |
| COLEC10    | 0.8667 | 1.1733 | 1.0646 | 0.8688 | 0.9933 | 0.0758 |
| SPANXA1    | 0.9634 | 1.0429 | 1.0732 | 0.8939 | 0.9933 | 0.0404 |
| FLJ12529   | 0.9226 | 1.1367 | 0.9901 | 0.9239 | 0.9933 | 0.0503 |
| PSTPIP1    | 0.9901 | 1.0174 | 0.9942 | 0.9717 | 0.9934 | 0.0094 |
| LOC643738  | 0.9620 | 1.0309 | 1.0307 | 0.9499 | 0.9934 | 0.0218 |
| UMOD       | 0.9210 | 1.1134 | 1.0075 | 0.9316 | 0.9934 | 0.0444 |
| LOC648453  | 1.0040 | 0.9585 | 1.0834 | 0.9276 | 0.9934 | 0.0339 |
| SFTA3      | 0.9505 | 0.9877 | 1.0733 | 0.9619 | 0.9934 | 0.0278 |
| LOC643475  | 1.0324 | 1.0188 | 1.0127 | 0.9097 | 0.9934 | 0.0282 |
| SPINK7     | 0.9870 | 1.0310 | 1.1004 | 0.8551 | 0.9934 | 0.0517 |
| TRIM10     | 0.9887 | 1.0561 | 1.0194 | 0.9092 | 0.9934 | 0.0312 |
| FAP        | 0.8619 | 0.9635 | 1.1326 | 1.0155 | 0.9934 | 0.0563 |
| LOC441257  | 0.9439 | 1.1094 | 0.9639 | 0.9563 | 0.9934 | 0.0389 |
| ZNF81      | 0.8899 | 1.1015 | 1.1093 | 0.8728 | 0.9934 | 0.0648 |
| KBTBD3     | 0.8481 | 1.1005 | 1.1422 | 0.8827 | 0.9934 | 0.0747 |
| RPRD1B     | 0.8979 | 1.2105 | 1.1238 | 0.7413 | 0.9934 | 0.1068 |
| LOC649075  | 0.9765 | 1.0577 | 1.0149 | 0.9245 | 0.9934 | 0.0283 |
| IWS1       | 0.9376 | 1.4092 | 0.8781 | 0.7487 | 0.9934 | 0.1441 |
| CCL21      | 0.8582 | 0.9542 | 1.1382 | 1.0230 | 0.9934 | 0.0589 |
| LOC1001328 | 0.9445 | 1.0676 | 0.9962 | 0.9653 | 0.9934 | 0.0269 |
| WDR21C     | 0.9147 | 1.1364 | 1.0372 | 0.8853 | 0.9934 | 0.0579 |
| SLCO1B3    | 0.9860 | 1.0370 | 1.0288 | 0.9218 | 0.9934 | 0.0264 |
| FLJ37587   | 0.9214 | 1.0164 | 1.0463 | 0.9896 | 0.9934 | 0.0267 |
| LOC255275  | 0.9487 | 1.1644 | 0.9635 | 0.8972 | 0.9934 | 0.0587 |
| CREG1      | 0.8704 | 1.3433 | 1.0493 | 0.7106 | 0.9934 | 0.1356 |
| CRYAA      | 0.9837 | 1.0838 | 0.9488 | 0.9574 | 0.9934 | 0.0310 |
| LOC388813  | 0.9262 | 1.0546 | 1.0511 | 0.9418 | 0.9934 | 0.0345 |
| LOC729830  | 0.9965 | 1.0817 | 0.9190 | 0.9765 | 0.9934 | 0.0337 |
| FREM1      | 0.9690 | 1.1670 | 0.8459 | 0.9919 | 0.9934 | 0.0661 |

|            |        |        |        |        |        |        |
|------------|--------|--------|--------|--------|--------|--------|
| SUMO1P1    | 1.0197 | 1.0469 | 1.0079 | 0.8994 | 0.9935 | 0.0324 |
| CARD17     | 0.9734 | 1.0933 | 1.0761 | 0.8310 | 0.9935 | 0.0603 |
| LOC1001331 | 0.9114 | 1.0536 | 1.0362 | 0.9727 | 0.9935 | 0.0324 |
| OR52H1     | 0.9381 | 1.1171 | 1.0099 | 0.9088 | 0.9935 | 0.0464 |
| MRGPRX3    | 0.9515 | 1.1074 | 0.9635 | 0.9515 | 0.9935 | 0.0381 |
| LOC1001303 | 0.9601 | 1.0650 | 0.9683 | 0.9805 | 0.9935 | 0.0242 |
| MIR5480    | 0.9117 | 1.0157 | 1.1680 | 0.8785 | 0.9935 | 0.0651 |
| OR51S1     | 0.9674 | 1.1759 | 0.9660 | 0.8647 | 0.9935 | 0.0654 |
| MGAT5      | 0.9494 | 1.0046 | 1.0688 | 0.9512 | 0.9935 | 0.0282 |
| LOC650534  | 0.9732 | 1.0411 | 1.0860 | 0.8737 | 0.9935 | 0.0462 |
| KIF26B     | 0.9272 | 1.0891 | 1.0229 | 0.9349 | 0.9935 | 0.0386 |
| LOC1001313 | 0.8157 | 1.3320 | 1.1498 | 0.6765 | 0.9935 | 0.1503 |
| LOC649282  | 0.9651 | 1.1378 | 1.0332 | 0.8380 | 0.9935 | 0.0628 |
| ZNF607     | 0.9907 | 1.1553 | 0.9918 | 0.8363 | 0.9935 | 0.0651 |
| DAB1       | 0.9730 | 0.9990 | 1.0300 | 0.9721 | 0.9935 | 0.0137 |
| LOC730085  | 0.9823 | 1.0501 | 1.0182 | 0.9235 | 0.9935 | 0.0271 |
| LOC645438  | 0.9222 | 1.1640 | 0.9669 | 0.9210 | 0.9935 | 0.0578 |
| RETNLB     | 0.9536 | 1.1130 | 0.9868 | 0.9206 | 0.9935 | 0.0421 |
| MLL2       | 0.9095 | 1.1244 | 1.1049 | 0.8354 | 0.9935 | 0.0717 |
| LOC1001337 | 0.9952 | 1.0812 | 1.0577 | 0.8399 | 0.9935 | 0.0543 |
| MSL2       | 0.9301 | 1.1355 | 1.0051 | 0.9035 | 0.9935 | 0.0520 |
| LOC647987  | 0.9619 | 1.0971 | 1.0549 | 0.8602 | 0.9935 | 0.0527 |
| LOC1001295 | 0.9819 | 1.0868 | 0.9986 | 0.9068 | 0.9935 | 0.0369 |
| LOC650261  | 0.8340 | 1.0986 | 1.0214 | 1.0201 | 0.9936 | 0.0563 |
| LOC1001346 | 1.0713 | 1.0468 | 0.9432 | 0.9129 | 0.9936 | 0.0386 |
| LOC1001288 | 1.0130 | 1.0438 | 0.9802 | 0.9372 | 0.9936 | 0.0228 |
| DDI2       | 0.9550 | 1.1329 | 0.9567 | 0.9297 | 0.9936 | 0.0468 |
| LOC283585  | 0.9899 | 1.0371 | 1.0896 | 0.8576 | 0.9936 | 0.0497 |
| C11orf40   | 0.9221 | 1.1283 | 0.9849 | 0.9389 | 0.9936 | 0.0468 |
| CACNG5     | 0.9616 | 1.0455 | 1.0205 | 0.9467 | 0.9936 | 0.0235 |
| LOC133185  | 0.8921 | 1.1586 | 0.9833 | 0.9403 | 0.9936 | 0.0581 |
| INSM2      | 0.9925 | 0.9555 | 1.0667 | 0.9595 | 0.9936 | 0.0258 |
| SP7        | 0.9800 | 1.0558 | 1.0188 | 0.9197 | 0.9936 | 0.0291 |
| KPNA7      | 0.9681 | 1.0889 | 1.0545 | 0.8627 | 0.9936 | 0.0505 |
| LOC284441  | 0.9247 | 1.1837 | 1.0319 | 0.8339 | 0.9936 | 0.0752 |
| FLJ90086   | 0.8519 | 1.2581 | 1.0557 | 0.8085 | 0.9936 | 0.1033 |
| LOC650840  | 0.7868 | 1.3076 | 0.9205 | 0.9594 | 0.9936 | 0.1110 |
| ENPP6      | 0.9354 | 1.1086 | 1.0518 | 0.8786 | 0.9936 | 0.0526 |
| LOC1001279 | 0.8503 | 1.1632 | 1.1295 | 0.8313 | 0.9936 | 0.0885 |
| LOC442211  | 0.9346 | 1.1409 | 1.0258 | 0.8731 | 0.9936 | 0.0583 |
| ACVR1      | 0.8363 | 1.2286 | 1.2009 | 0.7085 | 0.9936 | 0.1304 |
| HLA-DRB1   | 0.9499 | 1.0465 | 1.0254 | 0.9525 | 0.9936 | 0.0248 |
| ALDH9A1    | 0.9737 | 1.2574 | 1.0743 | 0.6691 | 0.9936 | 0.1231 |
| MIR18B     | 0.9179 | 1.0642 | 1.0166 | 0.9758 | 0.9936 | 0.0310 |
| MAP1LC3B2  | 0.9231 | 1.0835 | 1.0469 | 0.9209 | 0.9936 | 0.0420 |
| CSF2       | 0.9461 | 1.1263 | 1.0588 | 0.8433 | 0.9936 | 0.0624 |

|            |        |        |        |        |        |        |
|------------|--------|--------|--------|--------|--------|--------|
| PGA5       | 0.9713 | 1.0518 | 1.0614 | 0.8899 | 0.9936 | 0.0400 |
| OR10H3     | 0.9129 | 1.0889 | 1.0238 | 0.9488 | 0.9936 | 0.0393 |
| LOC653117  | 0.8944 | 1.1016 | 1.0274 | 0.9510 | 0.9936 | 0.0452 |
| CCL11      | 0.9047 | 1.1330 | 1.0977 | 0.8392 | 0.9936 | 0.0719 |
| ELANE      | 1.0355 | 1.0621 | 0.9792 | 0.8978 | 0.9936 | 0.0363 |
| DEFB113    | 0.9069 | 1.1171 | 1.0331 | 0.9174 | 0.9936 | 0.0501 |
| LOC388279  | 0.9484 | 1.0821 | 0.9873 | 0.9568 | 0.9937 | 0.0306 |
| TRIM39     | 1.0008 | 1.2448 | 0.9746 | 0.7544 | 0.9937 | 0.1003 |
| FLJ44060   | 1.0016 | 1.0502 | 0.9852 | 0.9376 | 0.9937 | 0.0232 |
| LOC648754  | 0.9535 | 1.0465 | 1.0464 | 0.9283 | 0.9937 | 0.0309 |
| C14orf49   | 0.8872 | 1.1104 | 1.0394 | 0.9377 | 0.9937 | 0.0501 |
| LOC642313  | 0.9292 | 1.1053 | 1.0054 | 0.9348 | 0.9937 | 0.0410 |
| LOC652887  | 0.8975 | 1.2266 | 1.0128 | 0.8379 | 0.9937 | 0.0857 |
| LOC654091  | 0.9570 | 1.1155 | 1.0315 | 0.8708 | 0.9937 | 0.0522 |
| DMRT3      | 0.9651 | 1.0554 | 0.9594 | 0.9949 | 0.9937 | 0.0220 |
| ERCC-00143 | 0.9850 | 1.0403 | 1.0315 | 0.9180 | 0.9937 | 0.0280 |
| GPC1       | 0.9561 | 1.0930 | 1.1294 | 0.7962 | 0.9937 | 0.0756 |
| DEFB117    | 1.0056 | 1.0720 | 0.9465 | 0.9507 | 0.9937 | 0.0294 |
| MIR548A2   | 0.8510 | 1.2231 | 1.1083 | 0.7925 | 0.9937 | 0.1027 |
| LOC648366  | 0.8344 | 1.1818 | 1.0316 | 0.9271 | 0.9937 | 0.0745 |
| KCNAB1     | 0.9469 | 1.1341 | 1.0071 | 0.8867 | 0.9937 | 0.0529 |
| ZNF300     | 0.9395 | 1.1764 | 1.0379 | 0.8212 | 0.9937 | 0.0753 |
| LOC653089  | 1.0120 | 1.0352 | 0.9744 | 0.9532 | 0.9937 | 0.0184 |
| LOC389332  | 0.9613 | 1.1034 | 1.0421 | 0.8680 | 0.9937 | 0.0510 |
| TSNAX      | 0.7512 | 1.5859 | 0.9873 | 0.6506 | 0.9937 | 0.2096 |
| BHLHB3     | 0.9410 | 1.1277 | 1.0227 | 0.8835 | 0.9937 | 0.0530 |
| ODF1       | 0.9651 | 1.0604 | 1.0351 | 0.9144 | 0.9937 | 0.0333 |
| ZNF76      | 0.9617 | 1.2245 | 0.9081 | 0.8807 | 0.9937 | 0.0787 |
| LOC651730  | 0.9262 | 1.0732 | 1.0087 | 0.9668 | 0.9937 | 0.0314 |
| ATP6V1C2   | 0.9758 | 1.1547 | 0.9583 | 0.8862 | 0.9937 | 0.0571 |
| OR14I1     | 1.0242 | 1.0323 | 0.9936 | 0.9249 | 0.9937 | 0.0244 |
| LOC643801  | 0.8822 | 1.0546 | 1.1253 | 0.9129 | 0.9937 | 0.0577 |
| LOC731742  | 0.8818 | 1.1733 | 1.0161 | 0.9037 | 0.9938 | 0.0667 |
| LOC149448  | 0.9905 | 1.1229 | 0.9518 | 0.9100 | 0.9938 | 0.0461 |
| LRRC69     | 0.8754 | 1.2517 | 0.9490 | 0.8989 | 0.9938 | 0.0873 |
| SCN2A      | 0.9558 | 1.0568 | 1.0304 | 0.9320 | 0.9938 | 0.0297 |
| PPP1R12C   | 1.0771 | 1.0609 | 0.8776 | 0.9595 | 0.9938 | 0.0467 |
| HMGB3L1    | 0.9200 | 1.0867 | 0.9822 | 0.9862 | 0.9938 | 0.0345 |
| FAM47C     | 0.8622 | 1.1206 | 1.0999 | 0.8923 | 0.9938 | 0.0677 |
| LOC1001344 | 0.9604 | 1.0266 | 1.0329 | 0.9552 | 0.9938 | 0.0208 |
| LOC441124  | 1.0112 | 1.1189 | 0.9192 | 0.9258 | 0.9938 | 0.0467 |
| LOC650713  | 0.9111 | 1.1507 | 1.0780 | 0.8353 | 0.9938 | 0.0728 |
| LOC653514  | 0.9422 | 1.2001 | 0.9495 | 0.8834 | 0.9938 | 0.0704 |
| LOC1001343 | 0.9632 | 1.0112 | 1.1007 | 0.9001 | 0.9938 | 0.0423 |
| GP6        | 0.9315 | 1.0786 | 1.0788 | 0.8864 | 0.9938 | 0.0499 |
| LOC1001334 | 0.9795 | 0.9749 | 1.0928 | 0.9280 | 0.9938 | 0.0350 |



|            |        |        |        |        |        |        |
|------------|--------|--------|--------|--------|--------|--------|
| ANKRD11    | 0.8977 | 1.3891 | 0.8906 | 0.7978 | 0.9938 | 0.1337 |
| LOC729454  | 0.9571 | 1.0680 | 1.0665 | 0.8837 | 0.9938 | 0.0450 |
| RTP3       | 0.9981 | 1.0938 | 0.9518 | 0.9315 | 0.9938 | 0.0361 |
| LOC732387  | 1.0101 | 1.1391 | 0.9500 | 0.8761 | 0.9938 | 0.0556 |
| CHRM3      | 0.7279 | 1.2305 | 1.2779 | 0.7391 | 0.9938 | 0.1506 |
| F7         | 0.9215 | 1.1618 | 0.9592 | 0.9327 | 0.9938 | 0.0566 |
| LOC400955  | 0.9428 | 1.0043 | 1.0962 | 0.9321 | 0.9938 | 0.0376 |
| PPP1R1C    | 0.9632 | 1.0660 | 1.0035 | 0.9427 | 0.9938 | 0.0272 |
| TLX2       | 0.9186 | 1.1328 | 0.9880 | 0.9359 | 0.9938 | 0.0486 |
| SLC24A6    | 0.9638 | 1.2933 | 0.9437 | 0.7747 | 0.9938 | 0.1085 |
| LOC390192  | 0.9307 | 1.1178 | 1.0012 | 0.9257 | 0.9939 | 0.0448 |
| LOC440030  | 0.9906 | 0.9890 | 1.0453 | 0.9505 | 0.9939 | 0.0195 |
| IMP5       | 0.9550 | 1.2156 | 0.9203 | 0.8847 | 0.9939 | 0.0753 |
| ESX1       | 0.9068 | 1.0799 | 1.0603 | 0.9285 | 0.9939 | 0.0444 |
| ELMOD2     | 0.7532 | 1.3093 | 1.2064 | 0.7067 | 0.9939 | 0.1541 |
| TAS2R42    | 0.9682 | 1.0813 | 1.0227 | 0.9034 | 0.9939 | 0.0380 |
| ITPKC      | 0.9956 | 1.1303 | 0.9422 | 0.9075 | 0.9939 | 0.0489 |
| LOC1001344 | 0.9647 | 0.9786 | 1.0929 | 0.9394 | 0.9939 | 0.0340 |
| ENPEP      | 0.9885 | 1.0679 | 0.9806 | 0.9386 | 0.9939 | 0.0270 |
| TBC1D26    | 0.9129 | 1.1166 | 0.9817 | 0.9644 | 0.9939 | 0.0434 |
| IGFL1      | 0.9133 | 1.0549 | 1.1115 | 0.8960 | 0.9939 | 0.0529 |
| FLJ20718   | 0.7697 | 1.4799 | 1.0048 | 0.7213 | 0.9939 | 0.1734 |
| CCDC73     | 1.0218 | 1.1374 | 0.9140 | 0.9025 | 0.9939 | 0.0548 |
| SPAM1      | 1.0013 | 0.9924 | 0.9870 | 0.9950 | 0.9939 | 0.0030 |
| LOC1001301 | 1.0306 | 1.0388 | 1.0021 | 0.9043 | 0.9939 | 0.0309 |
| TMEM136    | 0.7488 | 1.4386 | 1.1203 | 0.6680 | 0.9939 | 0.1780 |
| LOC644277  | 0.8928 | 1.0345 | 1.0896 | 0.9588 | 0.9939 | 0.0431 |
| SOCS3      | 0.9746 | 1.0565 | 1.0227 | 0.9219 | 0.9939 | 0.0293 |
| ANKRD18A   | 0.9304 | 1.0864 | 1.0325 | 0.9264 | 0.9939 | 0.0394 |
| ARHGAP28   | 0.9940 | 1.2119 | 1.0030 | 0.7669 | 0.9939 | 0.0909 |
| LOC643581  | 0.9465 | 1.0663 | 1.0472 | 0.9158 | 0.9939 | 0.0370 |
| GATA6      | 0.9041 | 1.0735 | 1.0319 | 0.9663 | 0.9939 | 0.0372 |
| LOC389730  | 0.9239 | 1.0228 | 1.0767 | 0.9524 | 0.9940 | 0.0345 |
| BPY2       | 1.0049 | 1.1122 | 0.9372 | 0.9216 | 0.9940 | 0.0434 |
| LOC1001312 | 1.0209 | 1.0340 | 0.9905 | 0.9304 | 0.9940 | 0.0230 |
| BCL3       | 0.9473 | 1.2470 | 0.9571 | 0.8244 | 0.9940 | 0.0896 |
| LOC1001312 | 0.9759 | 1.0467 | 0.9874 | 0.9658 | 0.9940 | 0.0181 |
| LOC649660  | 0.8742 | 1.1054 | 1.1289 | 0.8672 | 0.9940 | 0.0713 |
| TRIM32     | 0.7839 | 1.4185 | 1.0718 | 0.7017 | 0.9940 | 0.1622 |
| OR5A2      | 0.9219 | 0.9430 | 1.1864 | 0.9246 | 0.9940 | 0.0643 |
| CDY2A      | 0.9816 | 1.0649 | 0.9300 | 0.9994 | 0.9940 | 0.0279 |
| LOC729545  | 0.9666 | 1.0690 | 1.1413 | 0.7991 | 0.9940 | 0.0742 |
| CORIN      | 0.9506 | 1.1097 | 1.0071 | 0.9086 | 0.9940 | 0.0435 |
| HLA-DQB1   | 0.8696 | 1.1286 | 1.0630 | 0.9148 | 0.9940 | 0.0610 |
| LOC653636  | 0.9537 | 1.2186 | 0.9194 | 0.8844 | 0.9940 | 0.0762 |
| TP73       | 0.9502 | 1.1390 | 1.0161 | 0.8708 | 0.9940 | 0.0567 |

|            |        |        |        |        |        |        |
|------------|--------|--------|--------|--------|--------|--------|
| COPG2IT1   | 0.8355 | 1.0815 | 1.1111 | 0.9479 | 0.9940 | 0.0636 |
| RPL29P2    | 0.9634 | 1.0933 | 1.0130 | 0.9064 | 0.9940 | 0.0396 |
| STAMBP     | 0.9233 | 1.3266 | 1.0045 | 0.7217 | 0.9940 | 0.1258 |
| LOC1001301 | 1.0147 | 1.0228 | 0.9920 | 0.9466 | 0.9940 | 0.0171 |
| LOC645899  | 1.0210 | 1.1063 | 0.9987 | 0.8501 | 0.9940 | 0.0533 |
| LOC729387  | 1.0218 | 1.0069 | 1.0401 | 0.9073 | 0.9940 | 0.0297 |
| LOC729862  | 0.9070 | 1.0865 | 1.0363 | 0.9463 | 0.9940 | 0.0410 |
| LOC1001325 | 0.9382 | 1.1168 | 1.0651 | 0.8561 | 0.9940 | 0.0593 |
| SMTNL1     | 0.9949 | 1.0610 | 0.9665 | 0.9537 | 0.9940 | 0.0239 |
| GDPD1      | 0.8395 | 1.3684 | 0.9923 | 0.7759 | 0.9940 | 0.1328 |
| NDP        | 0.9527 | 1.2240 | 0.9774 | 0.8221 | 0.9940 | 0.0839 |
| UGT1A10    | 0.9331 | 1.0841 | 1.0425 | 0.9164 | 0.9940 | 0.0410 |
| LOC389036  | 1.1019 | 1.0179 | 0.9639 | 0.8924 | 0.9940 | 0.0442 |
| ZNF409     | 0.8557 | 1.1097 | 1.0458 | 0.9651 | 0.9940 | 0.0548 |
| LOC645755  | 0.8862 | 1.1100 | 1.0279 | 0.9520 | 0.9940 | 0.0483 |
| FOX1       | 0.9271 | 1.0677 | 1.0882 | 0.8932 | 0.9940 | 0.0491 |
| TMEM232    | 0.8666 | 1.1244 | 0.9572 | 1.0280 | 0.9941 | 0.0546 |
| SCGB3A1    | 0.9485 | 1.1563 | 0.9001 | 0.9714 | 0.9941 | 0.0561 |
| CENTB2     | 0.8869 | 1.1784 | 1.0663 | 0.8447 | 0.9941 | 0.0780 |
| LOC441768  | 0.9139 | 1.0927 | 1.0537 | 0.9160 | 0.9941 | 0.0464 |
| LOC390483  | 0.9352 | 1.0788 | 1.0340 | 0.9283 | 0.9941 | 0.0372 |
| LOC644644  | 0.7681 | 1.2158 | 0.9822 | 1.0101 | 0.9941 | 0.0916 |
| LOC1001340 | 1.0063 | 1.0036 | 1.0385 | 0.9279 | 0.9941 | 0.0234 |
| C16orf50   | 0.9551 | 1.0586 | 1.1009 | 0.8617 | 0.9941 | 0.0537 |
| SERPINA12  | 0.9217 | 1.1463 | 0.9510 | 0.9573 | 0.9941 | 0.0513 |
| LOC1001344 | 0.9414 | 1.0740 | 1.0349 | 0.9261 | 0.9941 | 0.0359 |
| KCNB2      | 1.0181 | 1.0350 | 1.0753 | 0.8479 | 0.9941 | 0.0502 |
| COL9A3     | 0.9719 | 1.0454 | 1.0066 | 0.9525 | 0.9941 | 0.0204 |
| RAPSN      | 0.9914 | 1.1110 | 0.9226 | 0.9513 | 0.9941 | 0.0414 |
| LOC646892  | 0.8912 | 1.0948 | 1.0715 | 0.9189 | 0.9941 | 0.0519 |
| C3orf46    | 0.9869 | 1.0232 | 1.0120 | 0.9544 | 0.9941 | 0.0153 |
| IFNA17     | 0.9511 | 1.0566 | 1.0098 | 0.9589 | 0.9941 | 0.0246 |
| TAS2R30    | 1.0209 | 0.9626 | 1.0640 | 0.9290 | 0.9941 | 0.0300 |
| BMP10      | 1.0322 | 0.9718 | 1.0249 | 0.9477 | 0.9941 | 0.0205 |
| LOC730198  | 0.9463 | 1.0174 | 1.1082 | 0.9047 | 0.9941 | 0.0446 |
| TLX1       | 0.9147 | 1.1301 | 1.0335 | 0.8982 | 0.9941 | 0.0544 |
| C11orf85   | 0.8546 | 1.1729 | 1.0154 | 0.9336 | 0.9942 | 0.0680 |
| LOC642130  | 0.9153 | 1.0170 | 1.0007 | 1.0438 | 0.9942 | 0.0278 |
| LOC1001289 | 0.9759 | 1.0309 | 1.0845 | 0.8854 | 0.9942 | 0.0425 |
| C17orf54   | 0.8761 | 1.1401 | 0.9861 | 0.9744 | 0.9942 | 0.0545 |
| ABCD2      | 0.9589 | 1.0371 | 1.0275 | 0.9532 | 0.9942 | 0.0221 |
| ABL2       | 0.9392 | 1.0880 | 1.0182 | 0.9314 | 0.9942 | 0.0369 |
| F11R       | 0.9853 | 1.0653 | 1.0450 | 0.8811 | 0.9942 | 0.0413 |
| LOC283804  | 0.9539 | 1.0728 | 0.9779 | 0.9722 | 0.9942 | 0.0267 |
| LOC650498  | 0.9183 | 1.0021 | 1.0390 | 1.0174 | 0.9942 | 0.0264 |
| UMODL1     | 0.8717 | 1.0808 | 1.0270 | 0.9972 | 0.9942 | 0.0443 |

|            |        |        |        |        |        |        |
|------------|--------|--------|--------|--------|--------|--------|
| FAM75A4    | 0.9387 | 1.0862 | 1.0676 | 0.8844 | 0.9942 | 0.0491 |
| C10orf27   | 0.9565 | 1.1119 | 0.9960 | 0.9125 | 0.9942 | 0.0428 |
| OR6C68     | 0.9508 | 1.1180 | 1.0351 | 0.8729 | 0.9942 | 0.0529 |
| LHCGR      | 0.9489 | 0.9972 | 1.0975 | 0.9333 | 0.9942 | 0.0370 |
| LOC388122  | 0.8387 | 1.2582 | 1.0752 | 0.8047 | 0.9942 | 0.1066 |
| FLJ46109   | 0.9395 | 1.1364 | 1.0122 | 0.8887 | 0.9942 | 0.0538 |
| TSPYL2     | 0.8760 | 1.2382 | 1.0232 | 0.8394 | 0.9942 | 0.0905 |
| SNORD19B   | 0.9954 | 1.0656 | 0.9981 | 0.9177 | 0.9942 | 0.0302 |
| USP40      | 0.8938 | 1.2071 | 1.0615 | 0.8144 | 0.9942 | 0.0877 |
| LOC648859  | 0.9292 | 1.0952 | 0.9786 | 0.9739 | 0.9942 | 0.0354 |
| LOC651101  | 0.9947 | 1.0922 | 1.0327 | 0.8572 | 0.9942 | 0.0499 |
| LOC1001310 | 0.9101 | 1.2006 | 1.0368 | 0.8294 | 0.9942 | 0.0810 |
| REG3A      | 0.8971 | 1.1505 | 1.0882 | 0.8411 | 0.9942 | 0.0742 |
| LOC653269  | 1.0133 | 1.0905 | 0.9023 | 0.9708 | 0.9942 | 0.0394 |
| LOC1001320 | 0.9195 | 1.1040 | 0.9829 | 0.9705 | 0.9942 | 0.0391 |
| LOC1001308 | 0.9897 | 1.0681 | 1.0272 | 0.8920 | 0.9942 | 0.0376 |
| SNORA69    | 0.8667 | 1.1324 | 1.0450 | 0.9329 | 0.9942 | 0.0589 |
| LOC644207  | 1.0053 | 1.0457 | 0.9843 | 0.9416 | 0.9942 | 0.0217 |
| PFN2       | 0.8437 | 1.2913 | 1.2304 | 0.6116 | 0.9942 | 0.1615 |
| SUMO4      | 0.9756 | 1.0393 | 0.9886 | 0.9736 | 0.9943 | 0.0154 |
| TNFRSF6B   | 0.9166 | 1.0430 | 1.0310 | 0.9864 | 0.9943 | 0.0286 |
| LOC729332  | 0.9188 | 1.0984 | 1.0737 | 0.8862 | 0.9943 | 0.0536 |
| LOC1001292 | 0.9440 | 1.0803 | 1.0841 | 0.8687 | 0.9943 | 0.0530 |
| LOC652379  | 0.9424 | 1.0663 | 1.1340 | 0.8343 | 0.9943 | 0.0664 |
| LOC1001278 | 0.9517 | 1.0823 | 1.0051 | 0.9380 | 0.9943 | 0.0327 |
| MAS1       | 1.0836 | 1.0241 | 0.9932 | 0.8762 | 0.9943 | 0.0436 |
| CRTAC1     | 0.8923 | 1.0550 | 1.0721 | 0.9577 | 0.9943 | 0.0423 |
| LOC646795  | 1.0100 | 1.0128 | 1.0511 | 0.9032 | 0.9943 | 0.0318 |
| LOC402066  | 0.9773 | 1.1560 | 0.9146 | 0.9292 | 0.9943 | 0.0555 |
| C9orf106   | 0.8777 | 1.1115 | 1.0246 | 0.9634 | 0.9943 | 0.0493 |
| LOC649775  | 1.0072 | 0.9959 | 1.0629 | 0.9113 | 0.9943 | 0.0313 |
| GPR182     | 0.7789 | 1.3610 | 1.0121 | 0.8253 | 0.9943 | 0.1322 |
| MEP1A      | 0.9150 | 1.0353 | 1.1101 | 0.9168 | 0.9943 | 0.0478 |
| LOC646589  | 0.9491 | 1.0629 | 1.0510 | 0.9143 | 0.9943 | 0.0369 |
| LOC388996  | 0.9717 | 1.0020 | 1.0622 | 0.9414 | 0.9943 | 0.0258 |
| JAKMIP3    | 0.9835 | 0.8981 | 1.1664 | 0.9293 | 0.9943 | 0.0600 |
| LOC1001320 | 0.8635 | 1.1461 | 1.0930 | 0.8747 | 0.9943 | 0.0731 |
| LOC1001343 | 0.8954 | 1.0579 | 1.0682 | 0.9559 | 0.9943 | 0.0416 |
| LOC645099  | 1.0116 | 1.0328 | 1.0823 | 0.8508 | 0.9943 | 0.0501 |
| LOC644387  | 1.0275 | 1.0375 | 0.9834 | 0.9290 | 0.9943 | 0.0247 |
| LCE1F      | 0.9010 | 1.0873 | 0.9330 | 1.0561 | 0.9944 | 0.0456 |
| DAPK1      | 0.9203 | 1.0608 | 1.0686 | 0.9277 | 0.9944 | 0.0407 |
| LRIG3      | 0.9139 | 1.1747 | 1.0456 | 0.8433 | 0.9944 | 0.0733 |
| FOXF1      | 0.9489 | 1.2273 | 0.9867 | 0.8146 | 0.9944 | 0.0860 |
| LOC347411  | 0.9139 | 1.1497 | 0.9122 | 1.0018 | 0.9944 | 0.0558 |
| LOC1001320 | 0.9959 | 1.1015 | 1.0303 | 0.8499 | 0.9944 | 0.0530 |

|            |        |        |        |        |        |        |
|------------|--------|--------|--------|--------|--------|--------|
| PKHD1      | 0.9160 | 1.0429 | 1.0987 | 0.9201 | 0.9944 | 0.0456 |
| MIR1289-1  | 0.9577 | 1.1395 | 1.0278 | 0.8526 | 0.9944 | 0.0603 |
| LOC648738  | 0.9810 | 1.1283 | 1.0285 | 0.8398 | 0.9944 | 0.0600 |
| PRKACG     | 1.0788 | 0.9750 | 0.9796 | 0.9443 | 0.9944 | 0.0292 |
| MIR141     | 0.9815 | 0.9784 | 1.0108 | 1.0071 | 0.9944 | 0.0084 |
| IL1RAPL2   | 0.9469 | 1.1124 | 1.0083 | 0.9101 | 0.9944 | 0.0442 |
| LOC729944  | 0.9700 | 1.1306 | 1.0479 | 0.8292 | 0.9944 | 0.0641 |
| PCDH18     | 0.9267 | 1.0874 | 1.0992 | 0.8645 | 0.9945 | 0.0585 |
| B4GALNT4   | 1.0929 | 1.1750 | 0.8918 | 0.8181 | 0.9945 | 0.0836 |
| LOC730351  | 0.9327 | 1.1155 | 1.0404 | 0.8892 | 0.9945 | 0.0514 |
| LOC649136  | 0.9236 | 1.1881 | 0.9845 | 0.8816 | 0.9945 | 0.0679 |
| OLA1       | 0.9565 | 1.1078 | 1.0228 | 0.8909 | 0.9945 | 0.0464 |
| DOCK10     | 1.0030 | 1.1684 | 0.9749 | 0.8316 | 0.9945 | 0.0691 |
| DNTT       | 0.9523 | 1.0456 | 1.0482 | 0.9319 | 0.9945 | 0.0305 |
| AIPL1      | 0.9659 | 1.1137 | 0.9298 | 0.9685 | 0.9945 | 0.0407 |
| LOC1001333 | 0.9881 | 1.0267 | 1.0125 | 0.9506 | 0.9945 | 0.0166 |
| DOCK4      | 0.9147 | 1.0785 | 1.0549 | 0.9299 | 0.9945 | 0.0421 |
| LOC646582  | 1.0074 | 1.1531 | 0.9398 | 0.8776 | 0.9945 | 0.0591 |
| XLKD1      | 0.9044 | 1.1500 | 0.9840 | 0.9396 | 0.9945 | 0.0543 |
| MYOF       | 0.9018 | 1.1220 | 1.1161 | 0.8381 | 0.9945 | 0.0731 |
| GAGE1      | 0.9536 | 1.1170 | 0.9788 | 0.9286 | 0.9945 | 0.0421 |
| LOC221981  | 0.9033 | 1.1228 | 1.0642 | 0.8878 | 0.9945 | 0.0585 |
| LOC1001299 | 0.9111 | 1.0779 | 1.0525 | 0.9366 | 0.9945 | 0.0415 |
| CASP4      | 0.9034 | 1.1714 | 1.1176 | 0.7858 | 0.9945 | 0.0905 |
| LOC650177  | 0.8476 | 1.0618 | 1.0923 | 0.9764 | 0.9945 | 0.0548 |
| PAPLN      | 0.8567 | 1.0639 | 1.1394 | 0.9181 | 0.9945 | 0.0650 |
| SMU1       | 0.7775 | 1.4470 | 0.9852 | 0.7684 | 0.9945 | 0.1589 |
| ASB5       | 0.9694 | 1.0658 | 1.0566 | 0.8862 | 0.9945 | 0.0421 |
| LOC732372  | 0.8920 | 1.0841 | 1.0607 | 0.9412 | 0.9945 | 0.0463 |
| LOC643116  | 1.0779 | 0.9602 | 1.0952 | 0.8448 | 0.9945 | 0.0582 |
| LOC728181  | 0.9142 | 1.2166 | 0.9985 | 0.8489 | 0.9945 | 0.0801 |
| KRT75      | 0.9512 | 1.0154 | 1.0963 | 0.9153 | 0.9945 | 0.0397 |
| DNAJA4     | 0.9187 | 1.1185 | 1.0403 | 0.9007 | 0.9945 | 0.0517 |
| ANKRD13D   | 0.9448 | 1.1171 | 0.9864 | 0.9299 | 0.9945 | 0.0426 |
| CAMTA2     | 0.9330 | 1.1891 | 0.9725 | 0.8836 | 0.9945 | 0.0674 |
| MIR595     | 0.9800 | 1.0680 | 1.0073 | 0.9230 | 0.9945 | 0.0301 |
| LOC1001323 | 1.0245 | 1.0907 | 1.0028 | 0.8602 | 0.9945 | 0.0485 |
| SNORD114-3 | 0.8762 | 1.0408 | 1.1349 | 0.9263 | 0.9946 | 0.0581 |
| SPHK2      | 0.8726 | 1.4543 | 0.9188 | 0.7325 | 0.9946 | 0.1583 |
| MLLT4      | 0.9610 | 1.0450 | 1.0172 | 0.9551 | 0.9946 | 0.0219 |
| LOC1001343 | 0.9891 | 1.0037 | 1.0865 | 0.8990 | 0.9946 | 0.0384 |
| LOC644573  | 0.8827 | 1.2319 | 1.0072 | 0.8566 | 0.9946 | 0.0857 |
| CDC27      | 0.9167 | 1.1045 | 1.1139 | 0.8433 | 0.9946 | 0.0679 |
| LOC390427  | 0.9046 | 1.1034 | 1.0168 | 0.9535 | 0.9946 | 0.0429 |
| MOSPD2     | 0.9307 | 1.1466 | 1.0868 | 0.8143 | 0.9946 | 0.0754 |
| LOC645947  | 0.9351 | 1.0526 | 1.0760 | 0.9146 | 0.9946 | 0.0408 |

|            |        |        |        |        |        |        |
|------------|--------|--------|--------|--------|--------|--------|
| ZBTB12     | 0.8847 | 1.1345 | 1.0204 | 0.9387 | 0.9946 | 0.0544 |
| SLC17A6    | 0.9612 | 1.0353 | 1.0372 | 0.9447 | 0.9946 | 0.0243 |
| SFTA1P     | 0.9438 | 1.0026 | 1.0794 | 0.9525 | 0.9946 | 0.0311 |
| HECTD1     | 0.8752 | 1.5942 | 0.8802 | 0.6287 | 0.9946 | 0.2083 |
| FLJ41481   | 0.8832 | 1.1880 | 1.0073 | 0.9000 | 0.9946 | 0.0701 |
| PLA2G6     | 1.0052 | 1.1203 | 0.9853 | 0.8676 | 0.9946 | 0.0517 |
| C7orf63    | 1.0220 | 1.3195 | 0.9443 | 0.6926 | 0.9946 | 0.1291 |
| PAK7       | 0.9729 | 1.0496 | 1.0379 | 0.9181 | 0.9946 | 0.0306 |
| LOC1001288 | 1.0746 | 0.9852 | 0.9831 | 0.9355 | 0.9946 | 0.0290 |
| OTOL1      | 1.0091 | 1.1587 | 0.9092 | 0.9014 | 0.9946 | 0.0599 |
| LOC651503  | 0.8476 | 1.1442 | 0.9960 | 0.9907 | 0.9946 | 0.0606 |
| RPL3L      | 0.9749 | 1.1267 | 1.0784 | 0.7986 | 0.9946 | 0.0726 |
| SIGLEC10   | 0.9890 | 1.1413 | 0.9319 | 0.9164 | 0.9946 | 0.0513 |
| TIMD4      | 0.9833 | 1.0728 | 0.9614 | 0.9610 | 0.9946 | 0.0266 |
| MIMT1      | 0.9003 | 1.2127 | 0.9916 | 0.8739 | 0.9946 | 0.0769 |
| KCNJ11     | 0.8999 | 1.0425 | 1.0680 | 0.9681 | 0.9946 | 0.0380 |
| LRRC48     | 0.9465 | 1.1436 | 1.0090 | 0.8794 | 0.9946 | 0.0563 |
| BCL2L15    | 0.9416 | 1.0081 | 1.0723 | 0.9566 | 0.9946 | 0.0296 |
| LOC338328  | 0.9162 | 1.0391 | 1.0762 | 0.9471 | 0.9947 | 0.0377 |
| LOC646588  | 0.9235 | 1.0940 | 1.0573 | 0.9038 | 0.9947 | 0.0475 |
| LOC642377  | 1.0213 | 1.0663 | 0.9742 | 0.9168 | 0.9947 | 0.0320 |
| LOC646976  | 0.8878 | 1.0663 | 1.1107 | 0.9139 | 0.9947 | 0.0552 |
| RPL32      | 1.0261 | 1.1894 | 1.0074 | 0.7558 | 0.9947 | 0.0895 |
| MIR548H3   | 0.9168 | 1.0469 | 1.0637 | 0.9513 | 0.9947 | 0.0359 |
| SSX3       | 0.8693 | 1.1156 | 1.0089 | 0.9849 | 0.9947 | 0.0505 |
| RNF126P1   | 1.0474 | 1.0837 | 0.9771 | 0.8705 | 0.9947 | 0.0469 |
| CLEC18C    | 0.9490 | 1.0030 | 1.0063 | 1.0204 | 0.9947 | 0.0157 |
| HPX        | 1.0148 | 1.1235 | 0.9183 | 0.9222 | 0.9947 | 0.0484 |
| LOC648981  | 0.9654 | 1.0495 | 1.0009 | 0.9629 | 0.9947 | 0.0202 |
| ZNF790     | 0.9048 | 0.9329 | 1.1158 | 1.0252 | 0.9947 | 0.0479 |
| ZC3H12D    | 0.9133 | 1.1580 | 1.0523 | 0.8552 | 0.9947 | 0.0684 |
| CACNG2     | 0.9946 | 1.0105 | 1.0939 | 0.8798 | 0.9947 | 0.0441 |
| LOC652401  | 0.9230 | 1.0465 | 1.0146 | 0.9946 | 0.9947 | 0.0262 |
| ANKRD21    | 0.9804 | 1.1243 | 0.9695 | 0.9045 | 0.9947 | 0.0463 |
| LOC646330  | 0.9315 | 1.2626 | 0.9906 | 0.7941 | 0.9947 | 0.0983 |
| NLRP2      | 0.9681 | 1.4898 | 0.8013 | 0.7197 | 0.9947 | 0.1729 |
| TGM5       | 0.9470 | 1.1074 | 1.0137 | 0.9108 | 0.9947 | 0.0432 |
| LOC440233  | 0.9386 | 0.9667 | 1.1895 | 0.8841 | 0.9947 | 0.0672 |
| CRB2       | 0.8411 | 1.1480 | 0.9941 | 0.9956 | 0.9947 | 0.0626 |
| LOC643857  | 0.9701 | 1.1039 | 1.0362 | 0.8686 | 0.9947 | 0.0501 |
| LOC651808  | 1.0206 | 1.1449 | 0.9188 | 0.8946 | 0.9947 | 0.0570 |
| CREB3L1    | 0.8637 | 1.1213 | 1.0907 | 0.9031 | 0.9947 | 0.0650 |
| PLA2G2C    | 1.0326 | 1.0322 | 1.0737 | 0.8405 | 0.9947 | 0.0523 |
| CAMP       | 0.9527 | 0.9529 | 1.1296 | 0.9438 | 0.9947 | 0.0450 |
| CPT1B      | 0.9181 | 1.0338 | 1.1456 | 0.8815 | 0.9948 | 0.0599 |
| MIR2113    | 0.9642 | 1.0844 | 1.0508 | 0.8796 | 0.9948 | 0.0460 |

|             |        |        |        |        |        |        |
|-------------|--------|--------|--------|--------|--------|--------|
| C12orf36    | 0.9899 | 1.0287 | 1.0941 | 0.8663 | 0.9948 | 0.0479 |
| TCEAL6      | 0.9565 | 1.0544 | 1.0253 | 0.9428 | 0.9948 | 0.0268 |
| LOC1001307  | 0.9458 | 1.0831 | 1.0252 | 0.9249 | 0.9948 | 0.0365 |
| TMEM27      | 1.0299 | 1.1460 | 1.0155 | 0.7876 | 0.9948 | 0.0750 |
| GEFT        | 0.9161 | 1.1182 | 0.9456 | 0.9992 | 0.9948 | 0.0446 |
| LOC642816   | 0.9121 | 1.0690 | 1.0432 | 0.9548 | 0.9948 | 0.0368 |
| LOC644908   | 1.0031 | 1.1510 | 0.8755 | 0.9495 | 0.9948 | 0.0583 |
| RBMV1F      | 0.8928 | 1.0201 | 1.0597 | 1.0064 | 0.9948 | 0.0358 |
| LOC649436   | 0.9105 | 1.1093 | 1.0123 | 0.9471 | 0.9948 | 0.0436 |
| LOC1001294  | 0.9389 | 1.0423 | 0.9919 | 1.0061 | 0.9948 | 0.0215 |
| LOC653118   | 0.8117 | 1.1325 | 1.1487 | 0.8864 | 0.9948 | 0.0856 |
| CSNK1G3     | 0.7311 | 1.4905 | 1.0421 | 0.7155 | 0.9948 | 0.1815 |
| ZNRF2       | 0.9515 | 1.1142 | 1.0284 | 0.8851 | 0.9948 | 0.0494 |
| C1QTNF3     | 1.0489 | 1.0152 | 1.0380 | 0.8771 | 0.9948 | 0.0399 |
| BNC1        | 0.9347 | 1.0874 | 1.0291 | 0.9281 | 0.9948 | 0.0385 |
| PRCD        | 0.8629 | 1.1668 | 1.0228 | 0.9267 | 0.9948 | 0.0661 |
| FAM90A15    | 1.0023 | 1.0057 | 1.0391 | 0.9322 | 0.9948 | 0.0225 |
| MGC24125    | 0.9161 | 1.0444 | 1.0874 | 0.9314 | 0.9948 | 0.0421 |
| C8orf44     | 0.8676 | 1.2143 | 1.0218 | 0.8758 | 0.9948 | 0.0813 |
| FAM124B     | 0.9286 | 1.0824 | 0.9836 | 0.9849 | 0.9949 | 0.0320 |
| HLA-F       | 0.9415 | 1.0788 | 1.1575 | 0.8016 | 0.9949 | 0.0784 |
| TRIM6-TRIM: | 0.9054 | 1.0917 | 1.0455 | 0.9368 | 0.9949 | 0.0441 |
| LOC652140   | 0.8707 | 1.1814 | 0.9769 | 0.9505 | 0.9949 | 0.0661 |
| LOC1001299  | 0.9794 | 1.0822 | 1.0610 | 0.8569 | 0.9949 | 0.0510 |
| LOC728457   | 0.9434 | 1.3400 | 0.9089 | 0.7872 | 0.9949 | 0.1198 |
| C21orf136   | 0.9110 | 1.1151 | 0.9902 | 0.9633 | 0.9949 | 0.0433 |
| LOC641964   | 0.9321 | 1.1150 | 1.0320 | 0.9005 | 0.9949 | 0.0489 |
| RFTN2       | 0.8879 | 1.0792 | 1.0656 | 0.9469 | 0.9949 | 0.0464 |
| VAX1        | 0.9384 | 1.0930 | 0.9925 | 0.9557 | 0.9949 | 0.0346 |
| PTPRH       | 0.9796 | 1.0905 | 1.0575 | 0.8519 | 0.9949 | 0.0530 |
| GSTA1       | 0.9820 | 1.1417 | 1.0245 | 0.8315 | 0.9949 | 0.0641 |
| SLC30A2     | 1.0188 | 1.0449 | 0.9918 | 0.9241 | 0.9949 | 0.0260 |
| KLHL13      | 0.8972 | 1.0688 | 1.0646 | 0.9490 | 0.9949 | 0.0428 |
| LOC400553   | 1.0090 | 1.0456 | 0.9589 | 0.9661 | 0.9949 | 0.0202 |
| LANCL3      | 0.9440 | 1.1261 | 1.0182 | 0.8912 | 0.9949 | 0.0509 |
| DLX6        | 0.9386 | 1.1607 | 0.9733 | 0.9070 | 0.9949 | 0.0569 |
| MSMP        | 0.9838 | 1.0763 | 1.0251 | 0.8944 | 0.9949 | 0.0385 |
| TUBB6       | 0.9512 | 1.1210 | 1.0136 | 0.8939 | 0.9949 | 0.0486 |
| MIR124-2    | 0.9775 | 1.0520 | 1.0509 | 0.8993 | 0.9949 | 0.0363 |
| WISP2       | 1.1147 | 0.9910 | 0.9928 | 0.8813 | 0.9949 | 0.0477 |
| MIR498      | 0.9775 | 1.0718 | 0.9768 | 0.9535 | 0.9949 | 0.0262 |
| LOC728758   | 0.9674 | 1.2136 | 0.9552 | 0.8435 | 0.9949 | 0.0780 |
| LGALS4      | 1.0649 | 1.1201 | 0.9312 | 0.8636 | 0.9949 | 0.0591 |
| DCN         | 0.9609 | 1.0990 | 1.0027 | 0.9172 | 0.9949 | 0.0388 |
| LOC643733   | 0.8642 | 1.2124 | 1.0246 | 0.8786 | 0.9949 | 0.0810 |
| PLAGL1      | 0.9550 | 1.0661 | 0.9871 | 0.9716 | 0.9949 | 0.0246 |

|            |        |        |        |        |        |        |
|------------|--------|--------|--------|--------|--------|--------|
| ANKRD44    | 0.8842 | 1.0768 | 1.1032 | 0.9157 | 0.9950 | 0.0555 |
| DBF4B      | 1.0065 | 1.0544 | 0.9877 | 0.9314 | 0.9950 | 0.0254 |
| LOC650180  | 0.9327 | 1.0672 | 1.0364 | 0.9436 | 0.9950 | 0.0335 |
| MIR2114    | 0.9785 | 0.9906 | 1.1083 | 0.9024 | 0.9950 | 0.0425 |
| CALML3     | 1.0394 | 0.9895 | 0.9963 | 0.9547 | 0.9950 | 0.0174 |
| LOC644613  | 1.0268 | 1.1932 | 0.8255 | 0.9344 | 0.9950 | 0.0778 |
| HRASLS     | 0.9125 | 1.0094 | 1.1856 | 0.8724 | 0.9950 | 0.0697 |
| ANO2       | 0.8901 | 1.1631 | 1.0191 | 0.9076 | 0.9950 | 0.0629 |
| LOC652586  | 0.9200 | 1.1802 | 1.0034 | 0.8764 | 0.9950 | 0.0671 |
| LOC642219  | 0.8908 | 1.0791 | 1.0007 | 1.0093 | 0.9950 | 0.0389 |
| DKFZp686E2 | 0.8650 | 1.1126 | 0.9841 | 1.0182 | 0.9950 | 0.0511 |
| LOC653807  | 0.9108 | 1.1358 | 1.0705 | 0.8628 | 0.9950 | 0.0646 |
| KIF5A      | 0.9368 | 1.0476 | 1.0718 | 0.9239 | 0.9950 | 0.0378 |
| KIR2DS4    | 1.0369 | 1.0709 | 0.9770 | 0.8953 | 0.9950 | 0.0385 |
| SLC5A4     | 1.0277 | 1.0419 | 0.9872 | 0.9232 | 0.9950 | 0.0266 |
| LOC642537  | 1.0209 | 1.0788 | 0.9700 | 0.9103 | 0.9950 | 0.0359 |
| LOC729143  | 0.9556 | 1.1784 | 1.0505 | 0.7955 | 0.9950 | 0.0807 |
| LOC1001289 | 0.9701 | 1.1046 | 0.9654 | 0.9400 | 0.9950 | 0.0371 |
| LOC284064  | 0.9187 | 1.0451 | 1.0488 | 0.9675 | 0.9950 | 0.0316 |
| LOC642267  | 0.9717 | 1.0650 | 1.0231 | 0.9203 | 0.9950 | 0.0314 |
| DLEC1      | 0.9501 | 1.0796 | 1.0200 | 0.9304 | 0.9950 | 0.0341 |
| MAGEE1     | 0.9807 | 1.1665 | 1.0476 | 0.7853 | 0.9950 | 0.0798 |
| LOC1001311 | 0.7591 | 1.1479 | 1.1922 | 0.8810 | 0.9950 | 0.1044 |
| CDH18      | 0.9459 | 1.1448 | 1.0437 | 0.8458 | 0.9950 | 0.0642 |
| CNTD2      | 1.0746 | 1.0374 | 0.9874 | 0.8807 | 0.9950 | 0.0421 |
| B4GALNT2   | 1.0618 | 1.0400 | 0.9233 | 0.9551 | 0.9951 | 0.0332 |
| C14orf119  | 0.8617 | 1.1469 | 1.0021 | 0.9695 | 0.9951 | 0.0589 |
| LOC727857  | 1.0229 | 1.0080 | 0.9923 | 0.9571 | 0.9951 | 0.0141 |
| LRRC25     | 0.9460 | 1.1098 | 1.0284 | 0.8961 | 0.9951 | 0.0470 |
| FAM3D      | 0.9483 | 1.0850 | 1.0413 | 0.9058 | 0.9951 | 0.0412 |
| MBD3L1     | 0.9150 | 1.1559 | 0.9720 | 0.9374 | 0.9951 | 0.0549 |
| LOC401915  | 0.9214 | 1.1668 | 1.0609 | 0.8312 | 0.9951 | 0.0742 |
| C4orf37    | 0.9168 | 1.0756 | 1.0290 | 0.9590 | 0.9951 | 0.0354 |
| STRC       | 0.9662 | 1.0610 | 1.0023 | 0.9510 | 0.9951 | 0.0245 |
| MIR652     | 0.9712 | 1.0189 | 1.0273 | 0.9631 | 0.9951 | 0.0163 |
| OR7C1      | 0.9562 | 1.0555 | 1.0442 | 0.9246 | 0.9951 | 0.0323 |
| RSPH10B    | 1.0211 | 1.0538 | 0.9862 | 0.9193 | 0.9951 | 0.0288 |
| LOC652816  | 0.9044 | 1.0305 | 1.0734 | 0.9721 | 0.9951 | 0.0367 |
| TRIM36     | 0.9314 | 1.1718 | 0.9968 | 0.8805 | 0.9951 | 0.0635 |
| SNORD27    | 0.9057 | 1.1689 | 1.0044 | 0.9016 | 0.9951 | 0.0626 |
| KIR2DS3    | 1.0023 | 1.0782 | 0.9866 | 0.9135 | 0.9951 | 0.0338 |
| LOC1001344 | 0.8677 | 1.2068 | 1.0569 | 0.8493 | 0.9951 | 0.0847 |
| ACY3       | 0.9688 | 1.0136 | 1.0665 | 0.9316 | 0.9951 | 0.0291 |
| LOC441642  | 0.9655 | 1.1208 | 1.0921 | 0.8022 | 0.9951 | 0.0726 |
| GPKOW      | 0.9072 | 1.0148 | 1.1937 | 0.8650 | 0.9952 | 0.0733 |
| MIR495     | 0.9619 | 1.1055 | 1.0140 | 0.8993 | 0.9952 | 0.0436 |

|            |        |        |        |        |        |        |
|------------|--------|--------|--------|--------|--------|--------|
| LOC1001279 | 0.9709 | 1.0727 | 0.9859 | 0.9512 | 0.9952 | 0.0268 |
| SRGAP1     | 0.9534 | 1.1757 | 0.9982 | 0.8534 | 0.9952 | 0.0674 |
| ESR2       | 1.0155 | 1.0831 | 0.9987 | 0.8834 | 0.9952 | 0.0415 |
| PROX1      | 0.9570 | 1.0465 | 1.0580 | 0.9192 | 0.9952 | 0.0339 |
| LOC728080  | 0.9606 | 1.0747 | 1.0519 | 0.8935 | 0.9952 | 0.0419 |
| SPINT3     | 0.9299 | 1.0615 | 1.0996 | 0.8898 | 0.9952 | 0.0505 |
| LOC1001325 | 0.8494 | 1.2392 | 0.9962 | 0.8959 | 0.9952 | 0.0869 |
| C14orf144  | 0.9240 | 1.0868 | 1.0454 | 0.9245 | 0.9952 | 0.0418 |
| AKAP8L     | 0.8392 | 1.2891 | 1.0596 | 0.7929 | 0.9952 | 0.1139 |
| SFRS16     | 1.0547 | 0.9987 | 1.0250 | 0.9024 | 0.9952 | 0.0330 |
| LOC1001308 | 0.9453 | 1.0427 | 1.1165 | 0.8763 | 0.9952 | 0.0529 |
| LOC647108  | 0.9928 | 1.0246 | 1.0257 | 0.9377 | 0.9952 | 0.0206 |
| LOC727846  | 0.8811 | 1.1444 | 1.0395 | 0.9158 | 0.9952 | 0.0602 |
| LOC642166  | 0.8671 | 1.0637 | 1.0639 | 0.9861 | 0.9952 | 0.0465 |
| FHL1       | 0.9716 | 1.1651 | 0.9089 | 0.9353 | 0.9952 | 0.0581 |
| UNC5A      | 0.9718 | 1.1609 | 0.9388 | 0.9093 | 0.9952 | 0.0567 |
| LOC1001321 | 0.9081 | 1.1184 | 1.0270 | 0.9274 | 0.9952 | 0.0486 |
| LOC643121  | 0.9571 | 1.1975 | 0.9350 | 0.8913 | 0.9952 | 0.0688 |
| TMOD1      | 0.9132 | 1.2299 | 0.9907 | 0.8471 | 0.9952 | 0.0836 |
| KRT33B     | 0.8885 | 0.9959 | 1.1097 | 0.9867 | 0.9952 | 0.0452 |
| LOC650427  | 0.8433 | 0.9978 | 1.1681 | 0.9717 | 0.9952 | 0.0668 |
| SPATA8     | 1.0198 | 0.9971 | 0.9161 | 1.0480 | 0.9952 | 0.0284 |
| LOC642338  | 0.9353 | 1.1552 | 0.9558 | 0.9347 | 0.9953 | 0.0535 |
| GALNTL5    | 0.9733 | 1.1108 | 1.0500 | 0.8469 | 0.9953 | 0.0569 |
| MIR214     | 0.9863 | 1.1611 | 0.9746 | 0.8591 | 0.9953 | 0.0623 |
| NEBL       | 0.9327 | 1.1481 | 1.0563 | 0.8440 | 0.9953 | 0.0670 |
| SPRR2A     | 0.9871 | 1.0925 | 1.0144 | 0.8871 | 0.9953 | 0.0424 |
| LOC653244  | 0.9489 | 1.0540 | 1.0613 | 0.9170 | 0.9953 | 0.0366 |
| ORAI3      | 1.0470 | 1.0976 | 1.0539 | 0.7826 | 0.9953 | 0.0718 |
| LOC651961  | 1.0443 | 1.0357 | 0.9767 | 0.9244 | 0.9953 | 0.0280 |
| LOC1001332 | 0.9902 | 1.0538 | 1.0176 | 0.9195 | 0.9953 | 0.0284 |
| RXFP2      | 0.9674 | 0.9852 | 1.1068 | 0.9218 | 0.9953 | 0.0395 |
| LOC650905  | 1.0357 | 0.9906 | 1.0843 | 0.8705 | 0.9953 | 0.0458 |
| TMEM16J    | 0.9754 | 1.0053 | 1.0521 | 0.9484 | 0.9953 | 0.0222 |
| LOC642490  | 0.8959 | 1.1621 | 0.9563 | 0.9669 | 0.9953 | 0.0577 |
| LOC642730  | 1.0170 | 1.0001 | 1.0558 | 0.9084 | 0.9953 | 0.0312 |
| CHN2       | 0.9018 | 1.0966 | 1.0268 | 0.9560 | 0.9953 | 0.0424 |
| LOC1001339 | 0.9850 | 1.0958 | 1.0218 | 0.8787 | 0.9953 | 0.0452 |
| SIX6       | 0.9182 | 1.1299 | 1.0663 | 0.8670 | 0.9953 | 0.0616 |
| LACE1      | 0.8402 | 1.1138 | 1.1132 | 0.9141 | 0.9953 | 0.0699 |
| C6orf59    | 0.9923 | 1.1048 | 0.9827 | 0.9016 | 0.9953 | 0.0418 |
| LOC1001289 | 1.0102 | 1.0452 | 1.0002 | 0.9256 | 0.9953 | 0.0252 |
| LOC650594  | 0.9665 | 1.0684 | 1.0217 | 0.9247 | 0.9953 | 0.0314 |
| KLK5       | 0.9805 | 1.0534 | 1.0116 | 0.9359 | 0.9953 | 0.0248 |
| PLCZ1      | 0.9482 | 1.0744 | 1.0307 | 0.9281 | 0.9953 | 0.0345 |
| LOC645078  | 0.9007 | 1.1415 | 1.0034 | 0.9358 | 0.9953 | 0.0532 |



|             |        |        |        |        |        |        |
|-------------|--------|--------|--------|--------|--------|--------|
| CORO2B      | 0.9607 | 1.0526 | 1.0774 | 0.8907 | 0.9953 | 0.0430 |
| ZNF358      | 0.9101 | 1.3658 | 0.8883 | 0.8171 | 0.9953 | 0.1251 |
| SSPN        | 0.9937 | 1.0776 | 1.0105 | 0.8997 | 0.9954 | 0.0367 |
| OCM2        | 0.9198 | 1.0162 | 1.1623 | 0.8830 | 0.9954 | 0.0623 |
| LOC652175   | 1.0098 | 1.1905 | 0.9833 | 0.7979 | 0.9954 | 0.0803 |
| PPP2R2D     | 0.8400 | 1.3227 | 1.0554 | 0.7633 | 0.9954 | 0.1254 |
| LOC1001286  | 0.9801 | 1.0648 | 1.0046 | 0.9320 | 0.9954 | 0.0276 |
| C7orf52     | 0.9363 | 1.1091 | 1.0365 | 0.8996 | 0.9954 | 0.0477 |
| LOC441246   | 0.8297 | 1.3076 | 1.0661 | 0.7781 | 0.9954 | 0.1215 |
| LOC1001300  | 0.9200 | 1.1122 | 1.1393 | 0.8100 | 0.9954 | 0.0787 |
| ACTN3       | 0.9381 | 1.1659 | 0.9990 | 0.8786 | 0.9954 | 0.0619 |
| P2RY12      | 0.9380 | 1.0818 | 1.0615 | 0.9003 | 0.9954 | 0.0449 |
| LOC643529   | 0.9737 | 1.1358 | 0.9348 | 0.9373 | 0.9954 | 0.0476 |
| TPR         | 0.9539 | 1.3069 | 0.8816 | 0.8392 | 0.9954 | 0.1065 |
| LOC652534   | 1.0062 | 1.0440 | 1.0336 | 0.8978 | 0.9954 | 0.0335 |
| MDFI        | 0.8634 | 1.2494 | 0.9215 | 0.9473 | 0.9954 | 0.0865 |
| SLC26A7     | 1.0562 | 0.9940 | 1.0175 | 0.9139 | 0.9954 | 0.0300 |
| LOC1001315  | 0.9587 | 1.0816 | 1.0553 | 0.8860 | 0.9954 | 0.0450 |
| LOC643697   | 0.9428 | 1.0485 | 0.9918 | 0.9985 | 0.9954 | 0.0216 |
| DEFB104B    | 0.9074 | 0.9769 | 1.0914 | 1.0060 | 0.9954 | 0.0381 |
| C17orf28    | 1.0739 | 1.1539 | 0.9750 | 0.7789 | 0.9954 | 0.0809 |
| OR2T33      | 0.9536 | 1.2151 | 0.9739 | 0.8391 | 0.9954 | 0.0790 |
| LOC1001336  | 0.9213 | 1.0213 | 1.0185 | 1.0206 | 0.9954 | 0.0247 |
| DEFB129     | 0.9712 | 1.0480 | 1.0381 | 0.9245 | 0.9954 | 0.0292 |
| LOC391767   | 0.9467 | 1.1701 | 1.0477 | 0.8173 | 0.9954 | 0.0749 |
| LOC643171   | 0.9335 | 1.0780 | 1.0805 | 0.8898 | 0.9954 | 0.0492 |
| LOC387701   | 0.9005 | 1.1349 | 0.9851 | 0.9613 | 0.9954 | 0.0498 |
| LOC648494   | 0.8799 | 1.2149 | 1.0821 | 0.8049 | 0.9955 | 0.0937 |
| LOC283155   | 1.0181 | 1.0419 | 1.0087 | 0.9132 | 0.9955 | 0.0283 |
| FANK1       | 0.9418 | 1.1864 | 1.0023 | 0.8513 | 0.9955 | 0.0708 |
| TMEM229B    | 0.8958 | 1.2115 | 0.9471 | 0.9275 | 0.9955 | 0.0728 |
| MIR486      | 0.9920 | 1.0755 | 0.9407 | 0.9737 | 0.9955 | 0.0287 |
| DMPK        | 0.9970 | 1.1002 | 1.0044 | 0.8803 | 0.9955 | 0.0450 |
| LOC651344   | 1.0013 | 0.9478 | 1.0160 | 1.0168 | 0.9955 | 0.0163 |
| TAF7L       | 0.9302 | 1.0333 | 1.0991 | 0.9193 | 0.9955 | 0.0430 |
| GINS1       | 0.9674 | 1.1534 | 0.8816 | 0.9796 | 0.9955 | 0.0570 |
| LOC1001342  | 0.9221 | 1.0914 | 1.0587 | 0.9096 | 0.9955 | 0.0465 |
| GALNT14     | 0.8617 | 1.2398 | 1.0499 | 0.8305 | 0.9955 | 0.0948 |
| DKFZP586I14 | 0.9576 | 1.2130 | 0.9550 | 0.8564 | 0.9955 | 0.0762 |
| LOC648230   | 0.9226 | 1.1575 | 1.0355 | 0.8663 | 0.9955 | 0.0644 |
| LOC283278   | 1.0845 | 1.0270 | 0.9912 | 0.8793 | 0.9955 | 0.0432 |
| ZNF449      | 0.8666 | 1.1845 | 1.0206 | 0.9103 | 0.9955 | 0.0708 |
| LOC648997   | 0.9694 | 1.0262 | 0.9816 | 1.0048 | 0.9955 | 0.0126 |
| ZCCHC2      | 0.9828 | 1.1043 | 1.0364 | 0.8586 | 0.9955 | 0.0520 |
| LOC728654   | 0.9927 | 1.0497 | 1.0248 | 0.9148 | 0.9955 | 0.0293 |
| LOC652460   | 1.0707 | 1.0366 | 0.9705 | 0.9043 | 0.9955 | 0.0368 |

|            |        |        |        |        |        |        |
|------------|--------|--------|--------|--------|--------|--------|
| CNKS1R1    | 0.9129 | 1.1501 | 0.9843 | 0.9348 | 0.9955 | 0.0536 |
| CCDC8      | 0.8923 | 1.0680 | 1.1493 | 0.8725 | 0.9955 | 0.0675 |
| LOC1001294 | 0.9000 | 1.0732 | 1.0818 | 0.9271 | 0.9955 | 0.0477 |
| CYBRD1     | 0.9781 | 0.9837 | 1.1061 | 0.9142 | 0.9955 | 0.0401 |
| LOC1001315 | 0.9421 | 1.0694 | 1.0264 | 0.9443 | 0.9955 | 0.0315 |
| LOC390933  | 0.9678 | 1.1572 | 0.9839 | 0.8732 | 0.9955 | 0.0592 |
| LOC652633  | 0.8574 | 1.2158 | 1.1096 | 0.7994 | 0.9955 | 0.0996 |
| LOC1001296 | 0.9098 | 1.0964 | 1.1485 | 0.8274 | 0.9955 | 0.0759 |
| PLAC2      | 0.9378 | 1.1114 | 0.9661 | 0.9670 | 0.9956 | 0.0392 |
| ZNF181     | 0.9964 | 1.0606 | 1.0518 | 0.8734 | 0.9956 | 0.0431 |
| LOC1001284 | 0.9242 | 1.0797 | 1.0451 | 0.9332 | 0.9956 | 0.0393 |
| CASP8      | 0.9030 | 1.0743 | 1.0858 | 0.9192 | 0.9956 | 0.0489 |
| INSL6      | 0.9984 | 1.0970 | 1.0015 | 0.8854 | 0.9956 | 0.0433 |
| C8orf54    | 0.9345 | 1.1610 | 0.9386 | 0.9481 | 0.9956 | 0.0552 |
| UTS2D      | 0.9571 | 1.1303 | 0.9984 | 0.8965 | 0.9956 | 0.0495 |
| GGTA1      | 0.9742 | 1.1099 | 1.0174 | 0.8808 | 0.9956 | 0.0476 |
| ERP27      | 0.9583 | 1.1623 | 0.9999 | 0.8617 | 0.9956 | 0.0627 |
| LOC1001301 | 0.9266 | 1.0428 | 1.0503 | 0.9626 | 0.9956 | 0.0304 |
| LOC642550  | 1.0261 | 1.0230 | 1.0207 | 0.9125 | 0.9956 | 0.0277 |
| LOC1001343 | 0.9424 | 1.0475 | 1.0945 | 0.8980 | 0.9956 | 0.0455 |
| LOC401351  | 1.0132 | 1.0652 | 0.9981 | 0.9059 | 0.9956 | 0.0332 |
| C7orf38    | 0.8570 | 1.2994 | 1.1455 | 0.6805 | 0.9956 | 0.1394 |
| LOC643747  | 1.0195 | 1.0317 | 1.0684 | 0.8629 | 0.9956 | 0.0454 |
| MET        | 0.8631 | 1.1989 | 0.9440 | 0.9764 | 0.9956 | 0.0718 |
| PGK2       | 1.0061 | 1.0296 | 1.0033 | 0.9435 | 0.9956 | 0.0184 |
| KLC4       | 0.9696 | 1.0870 | 1.0559 | 0.8699 | 0.9956 | 0.0487 |
| FAM160B1   | 0.7796 | 1.3767 | 1.1410 | 0.6853 | 0.9956 | 0.1606 |
| TPTE2      | 0.9083 | 1.0833 | 1.0519 | 0.9390 | 0.9956 | 0.0425 |
| LOC648127  | 0.8830 | 1.1373 | 1.1181 | 0.8442 | 0.9956 | 0.0767 |
| ATP10D     | 0.9787 | 0.9520 | 1.1208 | 0.9311 | 0.9956 | 0.0428 |
| LOC730378  | 0.9911 | 1.0566 | 1.0345 | 0.9003 | 0.9956 | 0.0346 |
| XAGE1E     | 0.8861 | 1.2441 | 1.0113 | 0.8410 | 0.9956 | 0.0903 |
| LOC646442  | 0.9462 | 0.9658 | 1.2209 | 0.8496 | 0.9956 | 0.0793 |
| LOC650280  | 0.9490 | 1.1253 | 0.9518 | 0.9565 | 0.9956 | 0.0433 |
| LOC728660  | 0.8328 | 1.0878 | 1.0663 | 0.9957 | 0.9956 | 0.0577 |
| LOC653584  | 1.0103 | 1.0521 | 1.0205 | 0.8997 | 0.9957 | 0.0332 |
| ATL1       | 1.0049 | 1.0572 | 0.9722 | 0.9482 | 0.9957 | 0.0236 |
| SLC4A1     | 0.8927 | 1.1351 | 1.0161 | 0.9387 | 0.9957 | 0.0530 |
| ZNF815     | 0.8625 | 1.2280 | 1.0391 | 0.8530 | 0.9957 | 0.0885 |
| YPEL4      | 0.9534 | 1.1147 | 1.0009 | 0.9136 | 0.9957 | 0.0435 |
| C10orf11   | 0.9033 | 1.1070 | 0.9994 | 0.9729 | 0.9957 | 0.0423 |
| LMO2       | 0.8964 | 1.1709 | 0.9627 | 0.9527 | 0.9957 | 0.0602 |
| CCNI       | 0.8329 | 1.2261 | 1.1275 | 0.7962 | 0.9957 | 0.1068 |
| LOC728117  | 0.9221 | 1.2577 | 1.0004 | 0.8025 | 0.9957 | 0.0964 |
| LOC441032  | 0.7495 | 1.0943 | 1.2917 | 0.8472 | 0.9957 | 0.1225 |
| BAAT       | 0.9109 | 0.9975 | 1.0732 | 1.0013 | 0.9957 | 0.0332 |

|            |        |        |        |        |        |        |
|------------|--------|--------|--------|--------|--------|--------|
| C22orf27   | 0.8872 | 1.3571 | 0.9572 | 0.7813 | 0.9957 | 0.1258 |
| GATA4      | 0.9707 | 1.0262 | 1.1018 | 0.8842 | 0.9957 | 0.0459 |
| ONECUT1    | 0.9730 | 1.0962 | 1.0295 | 0.8842 | 0.9957 | 0.0449 |
| USP22      | 0.9293 | 1.2899 | 0.9506 | 0.8132 | 0.9957 | 0.1026 |
| LOC440226  | 0.8772 | 1.1581 | 1.0914 | 0.8562 | 0.9957 | 0.0759 |
| LOC641975  | 0.8267 | 0.9549 | 1.2417 | 0.9596 | 0.9957 | 0.0876 |
| LOC652015  | 1.0552 | 1.0547 | 0.9914 | 0.8815 | 0.9957 | 0.0409 |
| CYP20A1    | 0.8693 | 1.2478 | 1.1046 | 0.7611 | 0.9957 | 0.1105 |
| IDO1       | 0.9799 | 1.0722 | 1.0135 | 0.9173 | 0.9957 | 0.0324 |
| LOC653232  | 0.9047 | 1.1209 | 1.1563 | 0.8010 | 0.9957 | 0.0855 |
| SNORD100   | 0.8377 | 1.0167 | 1.1150 | 1.0135 | 0.9957 | 0.0577 |
| KPNA5      | 0.8322 | 1.1414 | 1.1234 | 0.8860 | 0.9958 | 0.0797 |
| FLJ40039   | 0.9492 | 1.1149 | 1.0716 | 0.8474 | 0.9958 | 0.0606 |
| JPH3       | 0.9745 | 1.1006 | 0.9088 | 0.9992 | 0.9958 | 0.0398 |
| LOC1001347 | 0.8702 | 1.0686 | 1.1060 | 0.9382 | 0.9958 | 0.0552 |
| LOC641834  | 0.9317 | 1.0586 | 0.9905 | 1.0022 | 0.9958 | 0.0260 |
| AFF2       | 0.9597 | 1.1754 | 0.9893 | 0.8587 | 0.9958 | 0.0661 |
| KIF7       | 0.9489 | 1.1278 | 0.9369 | 0.9695 | 0.9958 | 0.0445 |
| TDRD6      | 0.8058 | 1.1653 | 1.0805 | 0.9315 | 0.9958 | 0.0797 |
| SUGT1P     | 0.9818 | 1.1922 | 1.0373 | 0.7718 | 0.9958 | 0.0869 |
| PCDHGA3    | 1.0128 | 0.9816 | 1.0533 | 0.9354 | 0.9958 | 0.0249 |
| LOC651468  | 0.9764 | 1.0626 | 1.0019 | 0.9423 | 0.9958 | 0.0254 |
| ZFP95      | 0.9070 | 1.2195 | 0.9781 | 0.8786 | 0.9958 | 0.0775 |
| LOC647257  | 1.0025 | 1.1276 | 0.9389 | 0.9143 | 0.9958 | 0.0477 |
| LOC653674  | 0.8907 | 1.1428 | 1.0953 | 0.8546 | 0.9958 | 0.0722 |
| CCDC142    | 0.9451 | 1.0953 | 0.9675 | 0.9755 | 0.9958 | 0.0338 |
| MGLL       | 0.9372 | 1.1471 | 1.0152 | 0.8839 | 0.9958 | 0.0572 |
| CIDEA      | 0.9590 | 1.0797 | 1.0402 | 0.9045 | 0.9958 | 0.0395 |
| LOC728725  | 0.9450 | 1.0437 | 1.1110 | 0.8837 | 0.9959 | 0.0506 |
| LOC1001296 | 0.9041 | 1.0694 | 1.1107 | 0.8992 | 0.9959 | 0.0551 |
| LOC1001293 | 1.0055 | 1.0671 | 0.9928 | 0.9181 | 0.9959 | 0.0306 |
| CCDC68     | 0.9845 | 1.1424 | 0.9726 | 0.8840 | 0.9959 | 0.0537 |
| LOC1001321 | 0.8915 | 1.1510 | 1.0048 | 0.9361 | 0.9959 | 0.0567 |
| LOC652843  | 1.0052 | 1.0377 | 0.9937 | 0.9469 | 0.9959 | 0.0188 |
| METTL10    | 0.9340 | 1.1628 | 1.0400 | 0.8467 | 0.9959 | 0.0683 |
| LOC647678  | 0.9963 | 1.1524 | 0.9884 | 0.8465 | 0.9959 | 0.0625 |
| GPM6A      | 0.9196 | 1.0892 | 1.0415 | 0.9332 | 0.9959 | 0.0414 |
| LOC650390  | 0.8480 | 1.1897 | 1.0475 | 0.8983 | 0.9959 | 0.0773 |
| LOC1001336 | 0.9822 | 1.0805 | 1.0780 | 0.8429 | 0.9959 | 0.0559 |
| GPLD1      | 0.9519 | 1.0376 | 1.0900 | 0.9041 | 0.9959 | 0.0418 |
| LOC648249  | 0.8058 | 1.5374 | 0.9832 | 0.6572 | 0.9959 | 0.1924 |
| TTC39A     | 0.8546 | 1.0323 | 1.0904 | 1.0063 | 0.9959 | 0.0503 |
| LOC728302  | 0.8680 | 1.0503 | 1.1838 | 0.8814 | 0.9959 | 0.0751 |
| IRAK2      | 0.9137 | 1.1830 | 1.1957 | 0.6912 | 0.9959 | 0.1206 |
| LOC1001286 | 0.8759 | 1.1662 | 1.0162 | 0.9253 | 0.9959 | 0.0638 |
| LOC1001317 | 0.8961 | 1.0279 | 1.1177 | 0.9419 | 0.9959 | 0.0489 |

|            |        |        |        |        |        |        |
|------------|--------|--------|--------|--------|--------|--------|
| BRD4       | 0.9018 | 1.0994 | 1.0286 | 0.9538 | 0.9959 | 0.0432 |
| LOC400036  | 0.9502 | 1.0961 | 0.9963 | 0.9412 | 0.9959 | 0.0355 |
| MYOCD      | 0.9942 | 1.0314 | 1.0237 | 0.9344 | 0.9959 | 0.0220 |
| LOC646201  | 0.9484 | 1.1000 | 1.0109 | 0.9245 | 0.9959 | 0.0392 |
| LOC651860  | 0.9132 | 1.0190 | 1.0644 | 0.9871 | 0.9959 | 0.0318 |
| LOC1001308 | 0.9508 | 1.0930 | 1.0746 | 0.8654 | 0.9959 | 0.0538 |
| ATP1A4     | 0.9480 | 1.0397 | 1.0405 | 0.9555 | 0.9959 | 0.0255 |
| FLJ33996   | 1.0239 | 1.1807 | 0.9465 | 0.8326 | 0.9960 | 0.0730 |
| KIRREL3    | 0.9407 | 1.1054 | 0.9985 | 0.9392 | 0.9960 | 0.0390 |
| LOC1001342 | 0.9504 | 1.0882 | 0.9992 | 0.9461 | 0.9960 | 0.0330 |
| TNFSF11    | 0.9567 | 1.0694 | 1.0277 | 0.9301 | 0.9960 | 0.0320 |
| LOC652616  | 0.8630 | 1.0431 | 1.0375 | 1.0403 | 0.9960 | 0.0443 |
| LOC646269  | 1.0204 | 0.9785 | 1.0259 | 0.9590 | 0.9960 | 0.0163 |
| LOC285095  | 1.0023 | 1.0700 | 1.0088 | 0.9028 | 0.9960 | 0.0346 |
| LOC642954  | 0.8332 | 1.0801 | 1.1933 | 0.8773 | 0.9960 | 0.0849 |
| LOC648998  | 0.8228 | 1.0790 | 1.1103 | 0.9718 | 0.9960 | 0.0649 |
| LOC389832  | 0.8818 | 1.1341 | 1.0937 | 0.8744 | 0.9960 | 0.0686 |
| GPR68      | 1.0064 | 1.1651 | 0.9563 | 0.8561 | 0.9960 | 0.0645 |
| FAM90A17   | 0.8536 | 1.1175 | 1.0069 | 1.0058 | 0.9960 | 0.0542 |
| FAM38B     | 0.9144 | 1.1862 | 1.0373 | 0.8460 | 0.9960 | 0.0748 |
| SPESP1     | 0.9392 | 1.0821 | 1.0101 | 0.9526 | 0.9960 | 0.0326 |
| CNBD1      | 1.0100 | 1.0235 | 1.0161 | 0.9345 | 0.9960 | 0.0207 |
| CLRN1OS    | 0.9796 | 0.9880 | 1.0532 | 0.9632 | 0.9960 | 0.0198 |
| TAS2R1     | 0.9343 | 1.1413 | 1.0120 | 0.8964 | 0.9960 | 0.0541 |
| DNMT3L     | 0.9383 | 1.0495 | 1.0584 | 0.9380 | 0.9960 | 0.0335 |
| LOC644035  | 0.9059 | 1.0221 | 1.0249 | 1.0312 | 0.9960 | 0.0301 |
| LOC648502  | 0.9361 | 1.0725 | 1.0725 | 0.9031 | 0.9960 | 0.0447 |
| ZNF85      | 0.9867 | 0.9797 | 1.0783 | 0.9394 | 0.9960 | 0.0293 |
| CASKIN2    | 0.8142 | 1.1098 | 1.1378 | 0.9223 | 0.9960 | 0.0772 |
| CLDN19     | 0.8798 | 1.1116 | 0.9956 | 0.9972 | 0.9960 | 0.0473 |
| LOC1001334 | 1.0212 | 1.4728 | 0.8649 | 0.6253 | 0.9960 | 0.1786 |
| SCG3       | 0.9330 | 1.0749 | 1.0173 | 0.9590 | 0.9961 | 0.0316 |
| DEFB115    | 1.0412 | 1.0251 | 1.0269 | 0.8910 | 0.9961 | 0.0352 |
| SPAG4L     | 0.9104 | 1.0921 | 0.9895 | 0.9922 | 0.9961 | 0.0372 |
| LOC1001334 | 0.9635 | 1.2388 | 0.9638 | 0.8182 | 0.9961 | 0.0879 |
| LOC653392  | 1.0272 | 1.0917 | 1.0423 | 0.8231 | 0.9961 | 0.0593 |
| LOC650140  | 1.0955 | 0.9369 | 1.0637 | 0.8883 | 0.9961 | 0.0496 |
| SPRY4      | 0.9608 | 1.1233 | 1.0194 | 0.8808 | 0.9961 | 0.0510 |
| LOC648689  | 0.8732 | 1.0990 | 1.0514 | 0.9608 | 0.9961 | 0.0500 |
| LEPR       | 0.9595 | 1.1295 | 1.0028 | 0.8926 | 0.9961 | 0.0499 |
| FLJ37228   | 0.8275 | 1.1798 | 1.0211 | 0.9559 | 0.9961 | 0.0733 |
| LOC643231  | 0.9958 | 1.1184 | 1.0083 | 0.8619 | 0.9961 | 0.0525 |
| LOC641733  | 0.9193 | 1.1386 | 0.9906 | 0.9360 | 0.9961 | 0.0499 |
| LOC651079  | 0.9818 | 1.0901 | 1.0281 | 0.8844 | 0.9961 | 0.0433 |
| LIPH       | 1.0128 | 1.1980 | 0.9795 | 0.7940 | 0.9961 | 0.0828 |
| SCYL3      | 0.9174 | 1.1579 | 1.1339 | 0.7753 | 0.9961 | 0.0913 |

|            |        |        |        |        |        |        |
|------------|--------|--------|--------|--------|--------|--------|
| LOC392787  | 0.9124 | 1.2077 | 0.9773 | 0.8871 | 0.9961 | 0.0730 |
| ITIH2      | 0.8507 | 1.0899 | 1.1188 | 0.9251 | 0.9961 | 0.0646 |
| LOC144481  | 0.9988 | 1.1029 | 0.9810 | 0.9018 | 0.9961 | 0.0414 |
| FLT4       | 0.9583 | 1.0645 | 1.0901 | 0.8716 | 0.9961 | 0.0504 |
| MIR218-1   | 0.9124 | 1.2102 | 0.9738 | 0.8881 | 0.9961 | 0.0736 |
| SPATA12    | 1.0268 | 1.0835 | 0.8815 | 0.9928 | 0.9962 | 0.0426 |
| LOC1001292 | 0.9813 | 1.1782 | 1.0613 | 0.7639 | 0.9962 | 0.0873 |
| LOC652849  | 0.9543 | 1.0648 | 1.0085 | 0.9571 | 0.9962 | 0.0261 |
| LOC643169  | 0.9211 | 1.0627 | 1.0491 | 0.9517 | 0.9962 | 0.0352 |
| CDRT1      | 0.8956 | 1.1143 | 1.0474 | 0.9274 | 0.9962 | 0.0512 |
| FAM71F1    | 1.0269 | 1.0219 | 0.9608 | 0.9752 | 0.9962 | 0.0166 |
| LOC644468  | 0.8477 | 1.0960 | 1.1082 | 0.9329 | 0.9962 | 0.0636 |
| EBI3       | 1.0143 | 1.0560 | 1.0122 | 0.9023 | 0.9962 | 0.0329 |
| TMSB4Y     | 0.9373 | 1.0521 | 1.0476 | 0.9478 | 0.9962 | 0.0311 |
| ANKRD20A2  | 0.9601 | 0.9963 | 1.1228 | 0.9056 | 0.9962 | 0.0461 |
| LOC653174  | 1.0253 | 1.0584 | 1.0075 | 0.8937 | 0.9962 | 0.0358 |
| AGXT2L1    | 0.9942 | 1.0562 | 0.9948 | 0.9396 | 0.9962 | 0.0238 |
| SEC61A1    | 0.9343 | 1.4267 | 0.9669 | 0.6569 | 0.9962 | 0.1595 |
| PPP1R16B   | 0.8569 | 1.1008 | 1.0977 | 0.9294 | 0.9962 | 0.0613 |
| LOC650329  | 1.0111 | 1.0497 | 1.0106 | 0.9134 | 0.9962 | 0.0291 |
| LOC651752  | 0.8601 | 1.1866 | 0.9810 | 0.9571 | 0.9962 | 0.0686 |
| POLR3H     | 0.9062 | 1.4102 | 0.9381 | 0.7303 | 0.9962 | 0.1454 |
| ZNF221     | 0.9194 | 1.1197 | 1.0392 | 0.9066 | 0.9962 | 0.0508 |
| LOC646342  | 0.9402 | 1.0931 | 1.0020 | 0.9496 | 0.9962 | 0.0350 |
| LOC729196  | 0.9832 | 1.0520 | 1.1513 | 0.7983 | 0.9962 | 0.0744 |
| CLDN2      | 0.9675 | 1.0273 | 1.0403 | 0.9498 | 0.9962 | 0.0221 |
| KIAA1409   | 0.9433 | 1.0798 | 1.0568 | 0.9049 | 0.9962 | 0.0426 |
| LOC643070  | 0.9245 | 1.0410 | 1.0610 | 0.9585 | 0.9962 | 0.0326 |
| SFRS13B    | 1.0043 | 1.0865 | 0.9490 | 0.9453 | 0.9963 | 0.0330 |
| FLJ40448   | 0.9603 | 1.0559 | 1.0482 | 0.9206 | 0.9963 | 0.0333 |
| MIR941-2   | 0.8488 | 1.1043 | 1.0261 | 1.0058 | 0.9963 | 0.0535 |
| LOC387931  | 1.0085 | 0.9799 | 1.0605 | 0.9361 | 0.9963 | 0.0261 |
| LOC399744  | 0.9700 | 1.1372 | 0.9395 | 0.9384 | 0.9963 | 0.0475 |
| PROM1      | 0.9208 | 1.0004 | 1.1218 | 0.9421 | 0.9963 | 0.0451 |
| RPS10      | 0.8841 | 1.1511 | 1.0304 | 0.9193 | 0.9963 | 0.0603 |
| ASTL       | 0.7956 | 1.1919 | 0.9945 | 1.0031 | 0.9963 | 0.0809 |
| SPATA6     | 0.9298 | 1.1482 | 1.0078 | 0.8993 | 0.9963 | 0.0556 |
| IGF2BP1    | 0.9825 | 1.1721 | 0.9768 | 0.8537 | 0.9963 | 0.0657 |
| LOC642044  | 0.8975 | 1.0291 | 1.0894 | 0.9693 | 0.9963 | 0.0411 |
| NTRK2      | 0.9291 | 1.1606 | 0.9804 | 0.9151 | 0.9963 | 0.0565 |
| LOC730415  | 0.9397 | 1.1188 | 1.0116 | 0.9151 | 0.9963 | 0.0457 |
| LOC728027  | 0.8434 | 1.1160 | 1.0929 | 0.9329 | 0.9963 | 0.0652 |
| LOC132707  | 1.0198 | 1.1184 | 1.0180 | 0.8290 | 0.9963 | 0.0605 |
| LOC1001323 | 1.0047 | 1.0519 | 1.0317 | 0.8970 | 0.9963 | 0.0345 |
| MVD        | 0.8891 | 1.1420 | 1.0944 | 0.8597 | 0.9963 | 0.0713 |
| TCF7       | 0.9820 | 1.0532 | 1.0042 | 0.9459 | 0.9963 | 0.0224 |

|            |        |        |        |        |        |        |
|------------|--------|--------|--------|--------|--------|--------|
| SLC12A4    | 0.8764 | 1.1692 | 1.0320 | 0.9078 | 0.9963 | 0.0667 |
| LOC730412  | 0.8471 | 1.1199 | 1.0387 | 0.9796 | 0.9963 | 0.0575 |
| FHL2       | 0.9349 | 1.1152 | 1.0277 | 0.9075 | 0.9963 | 0.0472 |
| LOC643531  | 0.8615 | 1.2792 | 1.0622 | 0.7825 | 0.9963 | 0.1111 |
| LOC1001332 | 0.9571 | 1.1633 | 0.9702 | 0.8948 | 0.9963 | 0.0580 |
| GSDM1      | 0.8979 | 0.9680 | 1.1410 | 0.9785 | 0.9963 | 0.0514 |
| MIR186     | 0.9140 | 0.9237 | 1.0816 | 1.0661 | 0.9963 | 0.0449 |
| ARHGAP23   | 0.9733 | 1.0637 | 1.0285 | 0.9199 | 0.9963 | 0.0316 |
| FLJ25439   | 0.9921 | 1.1572 | 0.9075 | 0.9286 | 0.9964 | 0.0566 |
| OR6B1      | 0.9597 | 0.9818 | 1.0431 | 1.0008 | 0.9964 | 0.0177 |
| SLC35D3    | 0.9564 | 1.0226 | 1.0399 | 0.9666 | 0.9964 | 0.0205 |
| REEP2      | 0.9803 | 1.0706 | 0.9570 | 0.9776 | 0.9964 | 0.0253 |
| LOC643015  | 0.9819 | 1.0534 | 1.0408 | 0.9093 | 0.9964 | 0.0329 |
| IP6K3      | 0.9756 | 1.0956 | 0.9345 | 0.9799 | 0.9964 | 0.0346 |
| LOC643429  | 0.9481 | 1.1500 | 1.0537 | 0.8337 | 0.9964 | 0.0681 |
| PDILT      | 1.0754 | 0.9869 | 1.0004 | 0.9227 | 0.9964 | 0.0313 |
| HBE1       | 0.9634 | 1.1235 | 0.9907 | 0.9078 | 0.9964 | 0.0457 |
| GJA10      | 0.9513 | 1.0487 | 1.1017 | 0.8838 | 0.9964 | 0.0488 |
| SLC7A13    | 0.9145 | 1.1499 | 0.9989 | 0.9221 | 0.9964 | 0.0546 |
| CCL25      | 0.9980 | 1.0606 | 1.0107 | 0.9162 | 0.9964 | 0.0299 |
| PCDHB3     | 1.0586 | 1.0730 | 0.9432 | 0.9108 | 0.9964 | 0.0407 |
| C3orf19    | 0.9342 | 1.3365 | 0.9268 | 0.7882 | 0.9964 | 0.1182 |
| LOC1001331 | 1.0679 | 1.0893 | 0.9708 | 0.8576 | 0.9964 | 0.0530 |
| SNORA71B   | 0.9423 | 1.0577 | 1.0997 | 0.8858 | 0.9964 | 0.0496 |
| MPRIP      | 0.9871 | 1.2790 | 0.9302 | 0.7892 | 0.9964 | 0.1030 |
| LOC401097  | 1.0281 | 1.0914 | 0.9841 | 0.8821 | 0.9964 | 0.0440 |
| LOC652837  | 0.9758 | 1.0781 | 1.0268 | 0.9051 | 0.9964 | 0.0369 |
| C11orf86   | 0.8682 | 1.1752 | 1.0436 | 0.8987 | 0.9964 | 0.0708 |
| ELOVL4     | 0.9619 | 1.0877 | 0.9538 | 0.9824 | 0.9964 | 0.0310 |
| LOC728658  | 0.9196 | 1.0773 | 1.0574 | 0.9314 | 0.9964 | 0.0412 |
| GTF2IRD2B  | 1.0039 | 1.3174 | 0.9438 | 0.7207 | 0.9964 | 0.1231 |
| LOC1001338 | 0.8226 | 1.1192 | 1.1366 | 0.9074 | 0.9964 | 0.0779 |
| SCNN1G     | 0.9680 | 1.0575 | 1.0192 | 0.9410 | 0.9964 | 0.0260 |
| KRTAP5-7   | 0.9498 | 1.1108 | 0.9869 | 0.9383 | 0.9965 | 0.0395 |
| LOC646350  | 0.9728 | 1.0541 | 1.0178 | 0.9412 | 0.9965 | 0.0248 |
| MAPK8IP2   | 0.9890 | 1.0701 | 0.9996 | 0.9271 | 0.9965 | 0.0293 |
| LOC650737  | 0.8007 | 1.2950 | 1.0275 | 0.8626 | 0.9965 | 0.1104 |
| LOC1001314 | 0.9089 | 1.0773 | 1.0783 | 0.9213 | 0.9965 | 0.0470 |
| LOC728531  | 0.9304 | 1.0493 | 1.0292 | 0.9769 | 0.9965 | 0.0268 |
| PSCDBP     | 0.9909 | 1.1347 | 0.9818 | 0.8785 | 0.9965 | 0.0526 |
| FAM90A1    | 0.8849 | 1.1069 | 1.0537 | 0.9404 | 0.9965 | 0.0509 |
| LBX2       | 1.0084 | 1.1163 | 1.0044 | 0.8569 | 0.9965 | 0.0533 |
| TSPAN15    | 1.0522 | 1.2264 | 0.9064 | 0.8010 | 0.9965 | 0.0923 |
| ZCCHC4     | 0.9466 | 1.0580 | 1.0426 | 0.9387 | 0.9965 | 0.0313 |
| LOC644944  | 0.8245 | 1.1023 | 1.0509 | 1.0084 | 0.9965 | 0.0605 |
| LOC648822  | 0.9309 | 1.1009 | 1.0956 | 0.8587 | 0.9965 | 0.0606 |

|            |        |        |        |        |        |        |
|------------|--------|--------|--------|--------|--------|--------|
| ADAMTS17   | 0.9071 | 1.1493 | 1.0049 | 0.9247 | 0.9965 | 0.0552 |
| OR52D1     | 1.0337 | 1.0375 | 0.9580 | 0.9568 | 0.9965 | 0.0226 |
| MSX2P1     | 0.9507 | 1.0706 | 1.0557 | 0.9091 | 0.9965 | 0.0395 |
| ATP6V1G1   | 0.9557 | 1.1606 | 1.2501 | 0.6196 | 0.9965 | 0.1399 |
| TMEM225    | 1.0019 | 1.1389 | 0.9990 | 0.8463 | 0.9965 | 0.0598 |
| MGC52000   | 0.9843 | 1.3350 | 0.8741 | 0.7926 | 0.9965 | 0.1195 |
| MLL3       | 0.9108 | 1.1872 | 1.0674 | 0.8207 | 0.9965 | 0.0815 |
| LOC643283  | 0.9992 | 1.0093 | 1.0327 | 0.9449 | 0.9965 | 0.0186 |
| PCDHB11    | 0.9571 | 1.1599 | 1.0464 | 0.8227 | 0.9965 | 0.0713 |
| MUM1       | 1.0069 | 1.2717 | 0.9175 | 0.7900 | 0.9965 | 0.1019 |
| JMJD7      | 0.9518 | 1.2535 | 1.0151 | 0.7657 | 0.9965 | 0.1007 |
| HSF5       | 0.9747 | 1.0991 | 0.9618 | 0.9506 | 0.9965 | 0.0345 |
| LOC728566  | 0.9045 | 1.2459 | 1.0205 | 0.8154 | 0.9966 | 0.0931 |
| LOC442060  | 0.9352 | 1.1150 | 1.0329 | 0.9032 | 0.9966 | 0.0482 |
| LOC650014  | 0.8540 | 0.9954 | 1.1170 | 1.0199 | 0.9966 | 0.0543 |
| LOC391352  | 0.9696 | 1.0233 | 1.1118 | 0.8816 | 0.9966 | 0.0483 |
| LOC1001346 | 0.9608 | 1.0756 | 1.0494 | 0.9005 | 0.9966 | 0.0403 |
| CEACAM8    | 0.9977 | 1.0465 | 1.0278 | 0.9144 | 0.9966 | 0.0292 |
| JPH4       | 0.8589 | 1.0389 | 1.1909 | 0.8977 | 0.9966 | 0.0755 |
| LOC728657  | 0.9163 | 1.1322 | 0.9666 | 0.9714 | 0.9966 | 0.0469 |
| NMBR       | 0.8751 | 1.0959 | 1.0992 | 0.9163 | 0.9966 | 0.0589 |
| RNF212     | 0.8432 | 1.1341 | 1.1147 | 0.8944 | 0.9966 | 0.0746 |
| PCM1       | 0.9749 | 1.2077 | 1.0500 | 0.7540 | 0.9966 | 0.0943 |
| LOC732343  | 0.9091 | 1.1602 | 0.9605 | 0.9566 | 0.9966 | 0.0558 |
| LOC650285  | 0.9728 | 1.0059 | 1.0420 | 0.9658 | 0.9966 | 0.0175 |
| C8orf46    | 0.8919 | 1.1208 | 0.9668 | 1.0070 | 0.9966 | 0.0478 |
| FLJ35816   | 0.9205 | 0.9636 | 1.1027 | 0.9998 | 0.9966 | 0.0389 |
| LOC1001334 | 0.9336 | 1.0981 | 0.9399 | 1.0151 | 0.9966 | 0.0385 |
| RPS15      | 0.9193 | 1.1889 | 1.0221 | 0.8563 | 0.9966 | 0.0726 |
| LOC650200  | 0.9123 | 1.0918 | 1.1066 | 0.8759 | 0.9966 | 0.0597 |
| LOC653081  | 1.0341 | 1.0655 | 0.9501 | 0.9369 | 0.9967 | 0.0315 |
| DGKI       | 0.9960 | 1.0583 | 1.0095 | 0.9229 | 0.9967 | 0.0280 |
| LOC730102  | 1.0224 | 1.0188 | 1.0067 | 0.9387 | 0.9967 | 0.0196 |
| ALAS2      | 0.9765 | 0.9998 | 1.0617 | 0.9487 | 0.9967 | 0.0241 |
| LOC643855  | 1.0157 | 0.9961 | 1.0855 | 0.8894 | 0.9967 | 0.0406 |
| CYP3A7     | 0.8133 | 1.1228 | 1.0929 | 0.9577 | 0.9967 | 0.0709 |
| FLJ13611   | 0.9278 | 0.9605 | 1.1853 | 0.9131 | 0.9967 | 0.0636 |
| TAAR6      | 0.9973 | 1.0486 | 1.0433 | 0.8975 | 0.9967 | 0.0350 |
| RBM33      | 1.0725 | 1.2430 | 0.8264 | 0.8449 | 0.9967 | 0.0994 |
| KRT7       | 0.8899 | 1.0600 | 1.1291 | 0.9078 | 0.9967 | 0.0583 |
| NCR2       | 0.9387 | 1.0395 | 1.0905 | 0.9180 | 0.9967 | 0.0410 |
| RASSF10    | 0.9573 | 1.0072 | 1.0333 | 0.9890 | 0.9967 | 0.0160 |
| GSG1       | 0.9315 | 1.1279 | 1.0315 | 0.8959 | 0.9967 | 0.0523 |
| LOC1001290 | 0.9303 | 1.0895 | 1.0151 | 0.9519 | 0.9967 | 0.0358 |
| LYNX1      | 0.8572 | 1.0834 | 1.0863 | 0.9599 | 0.9967 | 0.0551 |
| LOC1001346 | 0.9477 | 1.0280 | 1.0085 | 1.0026 | 0.9967 | 0.0172 |

|            |        |        |        |        |        |        |
|------------|--------|--------|--------|--------|--------|--------|
| LOC645464  | 0.9323 | 1.1760 | 0.9709 | 0.9076 | 0.9967 | 0.0612 |
| VNN2       | 0.9531 | 1.1001 | 1.0629 | 0.8706 | 0.9967 | 0.0523 |
| BTBD10     | 0.8457 | 1.2161 | 1.0328 | 0.8923 | 0.9967 | 0.0832 |
| LOC645718  | 0.9511 | 1.0320 | 1.0955 | 0.9082 | 0.9967 | 0.0417 |
| LOC650074  | 0.9707 | 1.0698 | 1.0530 | 0.8933 | 0.9967 | 0.0407 |
| MSLN       | 1.0295 | 1.1111 | 1.0509 | 0.7953 | 0.9967 | 0.0693 |
| LOC652222  | 0.9579 | 1.2508 | 0.9686 | 0.8096 | 0.9967 | 0.0921 |
| LOC644586  | 0.9281 | 1.1524 | 1.0319 | 0.8746 | 0.9967 | 0.0613 |
| LOC729793  | 1.0167 | 1.0384 | 1.0113 | 0.9205 | 0.9967 | 0.0261 |
| ATPIF1     | 0.9950 | 1.2520 | 1.0666 | 0.6734 | 0.9967 | 0.1206 |
| SSTR2      | 0.8829 | 1.1161 | 1.0791 | 0.9089 | 0.9967 | 0.0589 |
| TTY12      | 0.9130 | 1.1714 | 1.0412 | 0.8614 | 0.9968 | 0.0694 |
| IRF5       | 0.8801 | 1.1063 | 1.1279 | 0.8728 | 0.9968 | 0.0696 |
| LOC1001308 | 0.9770 | 1.1086 | 1.0586 | 0.8429 | 0.9968 | 0.0580 |
| DYSF       | 0.9697 | 1.0659 | 1.0133 | 0.9382 | 0.9968 | 0.0277 |
| LOC730329  | 0.9017 | 1.0608 | 1.0770 | 0.9475 | 0.9968 | 0.0428 |
| CCDC13     | 0.9388 | 1.1269 | 0.9562 | 0.9651 | 0.9968 | 0.0437 |
| LOC652779  | 0.8685 | 1.1732 | 1.0534 | 0.8920 | 0.9968 | 0.0718 |
| ZCCHC10    | 0.9751 | 1.0586 | 0.9921 | 0.9612 | 0.9968 | 0.0216 |
| LOC441869  | 1.0978 | 1.0245 | 0.9651 | 0.8996 | 0.9968 | 0.0422 |
| LOC1001328 | 1.0190 | 1.0851 | 1.0109 | 0.8722 | 0.9968 | 0.0447 |
| KRTAP4-12  | 1.0102 | 1.1104 | 1.0372 | 0.8294 | 0.9968 | 0.0597 |
| TIAM1      | 0.9508 | 1.0641 | 1.0694 | 0.9029 | 0.9968 | 0.0416 |
| LOC648365  | 1.0235 | 1.1277 | 0.9987 | 0.8373 | 0.9968 | 0.0600 |
| LOC653483  | 1.0080 | 1.0874 | 0.9970 | 0.8948 | 0.9968 | 0.0395 |
| FBXO17     | 0.9232 | 1.1252 | 1.0299 | 0.9090 | 0.9968 | 0.0506 |
| SLCO1B1    | 0.8903 | 1.1163 | 1.0375 | 0.9432 | 0.9968 | 0.0501 |
| LOC390671  | 1.0266 | 1.1038 | 0.9920 | 0.8648 | 0.9968 | 0.0498 |
| PPIL6      | 1.0402 | 1.0574 | 1.0172 | 0.8725 | 0.9968 | 0.0423 |
| FAM170A    | 0.8593 | 1.0412 | 1.1111 | 0.9757 | 0.9968 | 0.0535 |
| GJD3       | 0.9939 | 1.1233 | 1.0402 | 0.8299 | 0.9968 | 0.0618 |
| GSTM4      | 0.9011 | 1.0992 | 0.9964 | 0.9906 | 0.9968 | 0.0405 |
| LOC442299  | 1.0104 | 1.0451 | 1.0675 | 0.8644 | 0.9968 | 0.0457 |
| LOC147710  | 0.9203 | 1.1810 | 0.9376 | 0.9484 | 0.9968 | 0.0617 |
| TNFSF15    | 0.7968 | 1.2111 | 1.1332 | 0.8464 | 0.9969 | 0.1029 |
| YWHAE      | 1.0504 | 1.3775 | 0.8237 | 0.7358 | 0.9969 | 0.1431 |
| CA3        | 0.9300 | 1.0651 | 0.9960 | 0.9963 | 0.9969 | 0.0276 |
| LOC649137  | 0.9551 | 1.0301 | 1.1228 | 0.8794 | 0.9969 | 0.0520 |
| LOC729978  | 0.8047 | 1.7852 | 0.6746 | 0.7230 | 0.9969 | 0.2641 |
| LOC729732  | 1.0048 | 1.1185 | 0.9938 | 0.8705 | 0.9969 | 0.0507 |
| LOC646482  | 0.8799 | 1.1512 | 1.0543 | 0.9023 | 0.9969 | 0.0644 |
| LOC1001336 | 1.0154 | 1.0772 | 1.0606 | 0.8345 | 0.9969 | 0.0557 |
| FABP6      | 0.8994 | 1.1276 | 0.9993 | 0.9613 | 0.9969 | 0.0482 |
| UGT1A6     | 0.9698 | 1.0666 | 1.0061 | 0.9453 | 0.9969 | 0.0264 |
| NPFF       | 0.9317 | 1.2077 | 1.0022 | 0.8461 | 0.9969 | 0.0772 |
| LOC729715  | 0.9429 | 1.1927 | 0.9565 | 0.8957 | 0.9969 | 0.0665 |



|            |        |        |        |        |        |        |
|------------|--------|--------|--------|--------|--------|--------|
| FAM128A    | 1.0858 | 1.1180 | 1.0495 | 0.7344 | 0.9969 | 0.0886 |
| FGF11      | 0.9875 | 1.0702 | 1.0666 | 0.8635 | 0.9970 | 0.0484 |
| LOC650632  | 0.9387 | 0.9934 | 1.0668 | 0.9890 | 0.9970 | 0.0264 |
| MIR508     | 0.8855 | 1.1951 | 0.9803 | 0.9270 | 0.9970 | 0.0688 |
| OR6B2      | 0.9418 | 1.0732 | 1.0544 | 0.9185 | 0.9970 | 0.0391 |
| SNX9       | 1.0026 | 0.9961 | 1.0596 | 0.9296 | 0.9970 | 0.0266 |
| DDHD1      | 0.8987 | 1.1009 | 1.0937 | 0.8947 | 0.9970 | 0.0579 |
| LOC653830  | 0.9294 | 1.0559 | 1.0882 | 0.9144 | 0.9970 | 0.0439 |
| OR4C6      | 0.8912 | 1.1031 | 1.0612 | 0.9324 | 0.9970 | 0.0506 |
| LOC730713  | 0.9939 | 1.0161 | 1.0781 | 0.8999 | 0.9970 | 0.0369 |
| LOC642441  | 1.0525 | 1.0361 | 0.9707 | 0.9286 | 0.9970 | 0.0288 |
| HMX1       | 0.9621 | 1.0999 | 0.9557 | 0.9704 | 0.9970 | 0.0344 |
| C2orf32    | 0.8588 | 1.1056 | 1.0417 | 0.9819 | 0.9970 | 0.0525 |
| MIR574     | 1.0763 | 1.0700 | 0.8925 | 0.9491 | 0.9970 | 0.0455 |
| LOC1001293 | 1.0022 | 1.0620 | 1.0407 | 0.8832 | 0.9970 | 0.0399 |
| MIR1275    | 0.9048 | 1.1938 | 0.9927 | 0.8968 | 0.9970 | 0.0691 |
| C14orf105  | 0.9507 | 1.1100 | 1.0175 | 0.9099 | 0.9970 | 0.0437 |
| DLX6AS     | 0.9207 | 1.1379 | 0.9907 | 0.9389 | 0.9970 | 0.0492 |
| LOC728179  | 0.9397 | 1.0606 | 1.0791 | 0.9088 | 0.9970 | 0.0427 |
| LOC1001301 | 0.9371 | 1.0628 | 0.9792 | 1.0090 | 0.9970 | 0.0264 |
| LOC650767  | 1.0183 | 1.0622 | 1.0042 | 0.9034 | 0.9970 | 0.0336 |
| OR2J2      | 0.8025 | 1.0607 | 1.1584 | 0.9665 | 0.9970 | 0.0758 |
| LOC284620  | 1.0161 | 1.0032 | 1.1180 | 0.8509 | 0.9970 | 0.0551 |
| ZNF208     | 0.9754 | 1.0576 | 1.0034 | 0.9518 | 0.9970 | 0.0228 |
| C18orf20   | 0.9408 | 1.0534 | 1.1440 | 0.8501 | 0.9971 | 0.0642 |
| LOC647461  | 0.9770 | 1.0651 | 1.0498 | 0.8964 | 0.9971 | 0.0387 |
| LOC729731  | 0.8886 | 1.0889 | 1.0848 | 0.9259 | 0.9971 | 0.0524 |
| LOC1001294 | 0.9331 | 1.0571 | 1.0889 | 0.9091 | 0.9971 | 0.0446 |
| LOC643595  | 0.9532 | 1.0920 | 1.0480 | 0.8950 | 0.9971 | 0.0447 |
| HIGD1C     | 0.9442 | 1.1271 | 1.0293 | 0.8876 | 0.9971 | 0.0522 |
| VPS36      | 0.9487 | 1.1042 | 1.0738 | 0.8617 | 0.9971 | 0.0563 |
| MIR147     | 0.8805 | 1.1560 | 1.0498 | 0.9021 | 0.9971 | 0.0650 |
| SNORA49    | 0.9888 | 1.0970 | 0.9768 | 0.9258 | 0.9971 | 0.0360 |
| PXN        | 0.8570 | 1.1043 | 1.0672 | 0.9599 | 0.9971 | 0.0558 |
| KCNH7      | 0.9441 | 1.0973 | 1.0094 | 0.9375 | 0.9971 | 0.0371 |
| OR2K2      | 1.0215 | 1.0627 | 1.0373 | 0.8669 | 0.9971 | 0.0442 |
| PCDH11Y    | 0.9615 | 1.0768 | 1.0665 | 0.8836 | 0.9971 | 0.0459 |
| DGCR10     | 1.0166 | 1.0443 | 1.0304 | 0.8972 | 0.9971 | 0.0338 |
| OPALIN     | 0.9916 | 0.9768 | 1.0399 | 0.9802 | 0.9971 | 0.0146 |
| LOC651311  | 0.9394 | 1.1282 | 1.0758 | 0.8451 | 0.9971 | 0.0644 |
| LOC1001339 | 1.0556 | 1.0210 | 1.0136 | 0.8984 | 0.9971 | 0.0342 |
| LOC1001301 | 0.9607 | 1.1018 | 1.0333 | 0.8928 | 0.9971 | 0.0452 |
| CNDP1      | 0.9170 | 1.0568 | 1.0723 | 0.9426 | 0.9971 | 0.0394 |
| LOC402677  | 1.0132 | 1.1717 | 1.0439 | 0.7598 | 0.9972 | 0.0862 |
| OTX2       | 0.9703 | 1.1355 | 0.9576 | 0.9252 | 0.9972 | 0.0471 |
| IKBKG      | 0.9840 | 1.2698 | 0.9289 | 0.8059 | 0.9972 | 0.0982 |

|            |        |        |        |        |        |        |
|------------|--------|--------|--------|--------|--------|--------|
| ADAD1      | 0.9095 | 1.1593 | 1.0422 | 0.8776 | 0.9972 | 0.0647 |
| C6orf25    | 0.9600 | 1.0930 | 1.0058 | 0.9300 | 0.9972 | 0.0355 |
| LOC652789  | 1.0097 | 1.2193 | 0.9514 | 0.8083 | 0.9972 | 0.0853 |
| C2orf82    | 0.8955 | 1.2275 | 1.0423 | 0.8234 | 0.9972 | 0.0893 |
| LOC1001323 | 0.9736 | 1.0732 | 1.0073 | 0.9345 | 0.9972 | 0.0294 |
| LOC647199  | 1.0429 | 1.0668 | 0.9076 | 0.9714 | 0.9972 | 0.0361 |
| ZNF233     | 1.0608 | 1.0093 | 1.0077 | 0.9109 | 0.9972 | 0.0313 |
| SNORD6     | 0.9877 | 1.1563 | 0.9660 | 0.8787 | 0.9972 | 0.0580 |
| TNIP1      | 0.8383 | 1.3443 | 0.9668 | 0.8394 | 0.9972 | 0.1196 |
| CYP4F11    | 0.8540 | 1.1612 | 1.0939 | 0.8798 | 0.9972 | 0.0767 |
| LOC728114  | 1.0073 | 1.0694 | 1.0467 | 0.8655 | 0.9972 | 0.0458 |
| LOC650684  | 0.9421 | 1.1153 | 1.0449 | 0.8866 | 0.9972 | 0.0512 |
| LOC1001309 | 0.9199 | 1.1452 | 1.0369 | 0.8869 | 0.9972 | 0.0589 |
| CRTC1      | 1.0620 | 1.0900 | 0.9699 | 0.8670 | 0.9972 | 0.0504 |
| LOC644508  | 0.9453 | 1.2096 | 0.9758 | 0.8582 | 0.9972 | 0.0751 |
| SNORD60    | 1.0393 | 1.0823 | 0.9631 | 0.9042 | 0.9972 | 0.0396 |
| LOC651968  | 1.0083 | 1.0449 | 1.0175 | 0.9183 | 0.9972 | 0.0274 |
| GRP        | 0.9643 | 1.0782 | 1.0465 | 0.8999 | 0.9972 | 0.0403 |
| LOC650860  | 0.8907 | 1.2628 | 1.0323 | 0.8032 | 0.9972 | 0.1003 |
| SNORD102   | 0.9839 | 1.1275 | 1.0166 | 0.8609 | 0.9972 | 0.0549 |
| TMEM176B   | 0.9054 | 1.1190 | 1.0473 | 0.9174 | 0.9972 | 0.0518 |
| LOC728622  | 1.0195 | 1.0538 | 1.0557 | 0.8599 | 0.9972 | 0.0465 |
| ZNF785     | 0.9069 | 1.0705 | 1.1377 | 0.8739 | 0.9972 | 0.0636 |
| LOC1001300 | 0.9126 | 1.0800 | 1.1139 | 0.8825 | 0.9973 | 0.0583 |
| KIT        | 0.9263 | 1.0586 | 1.0218 | 0.9823 | 0.9973 | 0.0283 |
| SLC6A4     | 0.8952 | 1.0417 | 1.0448 | 1.0075 | 0.9973 | 0.0351 |
| NPFFR1     | 0.9576 | 1.2352 | 0.9931 | 0.8032 | 0.9973 | 0.0894 |
| PURB       | 0.8592 | 1.3969 | 0.9597 | 0.7734 | 0.9973 | 0.1385 |
| ZNF17      | 0.9264 | 1.2361 | 1.0351 | 0.7916 | 0.9973 | 0.0939 |
| CUBN       | 1.0257 | 1.0450 | 1.0482 | 0.8703 | 0.9973 | 0.0426 |
| CAND2      | 0.9631 | 1.0335 | 1.0788 | 0.9138 | 0.9973 | 0.0366 |
| LOC652684  | 0.9121 | 1.1383 | 1.0448 | 0.8940 | 0.9973 | 0.0578 |
| LOC729176  | 0.9484 | 1.0929 | 1.1114 | 0.8367 | 0.9973 | 0.0648 |
| UBASH3A    | 0.9134 | 1.0670 | 1.0478 | 0.9611 | 0.9973 | 0.0362 |
| LOC650314  | 0.9062 | 1.0993 | 1.0119 | 0.9719 | 0.9973 | 0.0404 |
| LOC729737  | 1.0134 | 1.0516 | 0.8805 | 1.0438 | 0.9973 | 0.0398 |
| LOC652349  | 0.9322 | 1.1144 | 1.0109 | 0.9318 | 0.9973 | 0.0432 |
| LOC642355  | 0.9064 | 1.1635 | 1.0220 | 0.8975 | 0.9973 | 0.0622 |
| LOC257039  | 0.9970 | 1.1040 | 0.9914 | 0.8970 | 0.9973 | 0.0423 |
| RERGL      | 0.8783 | 1.1350 | 1.0788 | 0.8973 | 0.9973 | 0.0644 |
| CTSS       | 0.9375 | 0.9866 | 1.0936 | 0.9718 | 0.9973 | 0.0337 |
| SLMO2      | 1.1028 | 1.0435 | 0.9577 | 0.8853 | 0.9974 | 0.0478 |
| CABP1      | 0.9547 | 1.0611 | 1.0723 | 0.9013 | 0.9974 | 0.0416 |
| ACOT6      | 0.8954 | 1.1048 | 1.0034 | 0.9858 | 0.9974 | 0.0429 |
| LOC1001304 | 0.9395 | 1.0989 | 0.9134 | 1.0376 | 0.9974 | 0.0431 |
| DNAH17     | 0.9544 | 0.9647 | 1.1054 | 0.9650 | 0.9974 | 0.0361 |

|            |        |        |        |        |        |        |
|------------|--------|--------|--------|--------|--------|--------|
| LOC1000096 | 0.8560 | 1.2065 | 1.1229 | 0.8042 | 0.9974 | 0.0987 |
| GNE        | 1.0598 | 1.1250 | 0.9798 | 0.8249 | 0.9974 | 0.0647 |
| TMEM26     | 0.8723 | 1.2101 | 0.9555 | 0.9516 | 0.9974 | 0.0735 |
| NOL4       | 1.0547 | 1.0406 | 1.0237 | 0.8706 | 0.9974 | 0.0427 |
| C16orf10   | 0.8815 | 1.2311 | 1.0008 | 0.8762 | 0.9974 | 0.0830 |
| VAMP5      | 1.0755 | 1.0530 | 0.9716 | 0.8895 | 0.9974 | 0.0423 |
| CEACAM7    | 0.9643 | 1.0511 | 1.0817 | 0.8925 | 0.9974 | 0.0429 |
| LOC644898  | 0.9965 | 1.1575 | 0.9902 | 0.8455 | 0.9974 | 0.0637 |
| LOC642833  | 1.0416 | 1.2561 | 0.8148 | 0.8772 | 0.9974 | 0.0986 |
| CYB5D2     | 0.9443 | 1.6586 | 0.8063 | 0.5805 | 0.9974 | 0.2328 |
| LOC148430  | 0.9567 | 1.0666 | 1.1443 | 0.8221 | 0.9974 | 0.0700 |
| LOC645312  | 0.8822 | 1.0964 | 1.0591 | 0.9521 | 0.9974 | 0.0491 |
| LOC402217  | 1.0199 | 1.0647 | 0.9446 | 0.9605 | 0.9974 | 0.0277 |
| H2BFWT     | 0.9005 | 1.0327 | 1.0963 | 0.9602 | 0.9974 | 0.0426 |
| NHLH2      | 0.9093 | 1.0310 | 1.1094 | 0.9400 | 0.9974 | 0.0454 |
| MYOZ1      | 0.9425 | 1.0479 | 1.0813 | 0.9181 | 0.9974 | 0.0397 |
| LOC441378  | 1.0342 | 1.0435 | 0.9561 | 0.9559 | 0.9974 | 0.0240 |
| LOC146053  | 0.9521 | 1.0854 | 1.0085 | 0.9438 | 0.9974 | 0.0327 |
| REP15      | 0.8781 | 1.1079 | 1.0870 | 0.9168 | 0.9974 | 0.0584 |
| LOC650013  | 1.0052 | 1.0853 | 0.9257 | 0.9736 | 0.9974 | 0.0335 |
| CTSW       | 0.9323 | 1.0571 | 1.0357 | 0.9647 | 0.9975 | 0.0294 |
| LOC442560  | 1.0257 | 1.1181 | 1.0491 | 0.7970 | 0.9975 | 0.0696 |
| LOC647961  | 0.9686 | 1.0504 | 1.0590 | 0.9119 | 0.9975 | 0.0351 |
| LOC644769  | 0.9836 | 1.1404 | 0.9989 | 0.8670 | 0.9975 | 0.0560 |
| ZBTB34     | 0.9416 | 1.2783 | 0.9843 | 0.7857 | 0.9975 | 0.1029 |
| LOC1001294 | 0.9545 | 0.9567 | 1.0828 | 0.9959 | 0.9975 | 0.0300 |
| DIO1       | 0.9087 | 1.2565 | 1.0259 | 0.7988 | 0.9975 | 0.0980 |
| MAPK15     | 0.8981 | 1.0974 | 0.9636 | 1.0308 | 0.9975 | 0.0429 |
| ZNF98      | 0.8978 | 1.0780 | 1.0948 | 0.9194 | 0.9975 | 0.0516 |
| CDKL1      | 0.9120 | 1.1571 | 0.9858 | 0.9351 | 0.9975 | 0.0554 |
| KLRG1      | 0.9099 | 1.0757 | 1.0626 | 0.9418 | 0.9975 | 0.0420 |
| LOC727849  | 0.8407 | 1.1697 | 1.1169 | 0.8628 | 0.9975 | 0.0850 |
| LOC648758  | 0.9171 | 1.1521 | 1.0681 | 0.8527 | 0.9975 | 0.0685 |
| YTHDC1     | 0.7866 | 1.3533 | 1.0658 | 0.7843 | 0.9975 | 0.1358 |
| FLJ27354   | 0.9736 | 1.1017 | 0.9976 | 0.9171 | 0.9975 | 0.0386 |
| PRKAB1     | 1.0185 | 1.2909 | 0.9505 | 0.7302 | 0.9975 | 0.1155 |
| LOC1001304 | 0.8766 | 1.1231 | 1.0181 | 0.9723 | 0.9975 | 0.0512 |
| LCNL1      | 0.8740 | 1.1038 | 0.9634 | 1.0489 | 0.9975 | 0.0503 |
| LOC1001319 | 0.9929 | 1.1763 | 0.9053 | 0.9156 | 0.9975 | 0.0627 |
| MIR326     | 0.8476 | 1.2015 | 1.0523 | 0.8887 | 0.9975 | 0.0811 |
| LOC390578  | 0.8887 | 1.1700 | 1.1338 | 0.7976 | 0.9975 | 0.0913 |
| MAMDC4     | 0.9389 | 1.1013 | 0.9811 | 0.9688 | 0.9975 | 0.0357 |
| MGC71805   | 0.8847 | 1.2015 | 0.9813 | 0.9227 | 0.9975 | 0.0708 |
| GIMAP1     | 0.9511 | 1.0954 | 1.0099 | 0.9338 | 0.9975 | 0.0365 |
| LOC647947  | 0.9325 | 1.1681 | 0.9867 | 0.9029 | 0.9975 | 0.0594 |
| C15orf62   | 1.0827 | 1.1399 | 0.9373 | 0.8303 | 0.9975 | 0.0702 |

|            |        |        |        |        |        |        |
|------------|--------|--------|--------|--------|--------|--------|
| TIMM50     | 0.9911 | 1.0782 | 1.0647 | 0.8562 | 0.9975 | 0.0509 |
| HLA-DQA1   | 0.9126 | 1.0923 | 1.0922 | 0.8930 | 0.9975 | 0.0548 |
| CPLX3      | 1.0410 | 1.0307 | 1.0363 | 0.8822 | 0.9976 | 0.0385 |
| LOC1001305 | 0.9477 | 1.1332 | 0.9926 | 0.9167 | 0.9976 | 0.0478 |
| LIMS3      | 0.8929 | 1.1036 | 1.0618 | 0.9321 | 0.9976 | 0.0505 |
| PSG11      | 0.9183 | 1.1316 | 1.0187 | 0.9217 | 0.9976 | 0.0504 |
| SPG3A      | 1.0449 | 1.1230 | 0.9475 | 0.8749 | 0.9976 | 0.0544 |
| LOC1001325 | 0.9675 | 1.0755 | 1.0579 | 0.8895 | 0.9976 | 0.0431 |
| SLC6A12    | 0.9687 | 1.0390 | 1.0414 | 0.9412 | 0.9976 | 0.0252 |
| LOC1001348 | 0.8350 | 1.2995 | 0.9030 | 0.9528 | 0.9976 | 0.1035 |
| ADAMTS19   | 1.0545 | 0.9295 | 1.0698 | 0.9365 | 0.9976 | 0.0374 |
| SMAD4      | 0.8990 | 1.2947 | 1.0610 | 0.7357 | 0.9976 | 0.1192 |
| HSH2D      | 0.9996 | 1.2008 | 0.9464 | 0.8435 | 0.9976 | 0.0751 |
| OLIG2      | 0.9174 | 1.1928 | 1.0221 | 0.8581 | 0.9976 | 0.0734 |
| LOC441698  | 0.8893 | 1.1453 | 0.9685 | 0.9872 | 0.9976 | 0.0536 |
| LOC651137  | 0.8841 | 1.1551 | 1.0109 | 0.9404 | 0.9976 | 0.0585 |
| PITPNM3    | 1.0170 | 1.0106 | 1.0085 | 0.9543 | 0.9976 | 0.0145 |
| KLHL30     | 0.9874 | 1.0149 | 1.0814 | 0.9068 | 0.9976 | 0.0361 |
| LOC1001330 | 0.9296 | 1.0652 | 1.0137 | 0.9819 | 0.9976 | 0.0284 |
| LOC402635  | 1.0461 | 1.0898 | 0.9550 | 0.8996 | 0.9976 | 0.0431 |
| LOC729826  | 0.9456 | 1.1479 | 0.9610 | 0.9360 | 0.9976 | 0.0503 |
| OR1L4      | 0.9601 | 1.0618 | 1.0653 | 0.9033 | 0.9976 | 0.0398 |
| CXCL3      | 0.9491 | 1.0336 | 1.0850 | 0.9228 | 0.9976 | 0.0375 |
| XGPY2      | 1.0047 | 1.0952 | 1.0233 | 0.8674 | 0.9976 | 0.0476 |
| PTGER3     | 0.9459 | 1.0780 | 1.0721 | 0.8946 | 0.9976 | 0.0459 |
| AKAP9      | 0.9352 | 1.0957 | 1.0087 | 0.9509 | 0.9976 | 0.0363 |
| C7orf69    | 0.9606 | 1.1270 | 1.0430 | 0.8599 | 0.9976 | 0.0571 |
| LOC644250  | 0.8431 | 1.2853 | 1.0607 | 0.8014 | 0.9976 | 0.1115 |
| ILDR2      | 0.9919 | 1.0615 | 1.0236 | 0.9136 | 0.9976 | 0.0314 |
| ADAMTS9    | 0.9764 | 1.0777 | 1.0275 | 0.9089 | 0.9976 | 0.0361 |
| LOC653715  | 0.9401 | 1.0298 | 1.0002 | 1.0205 | 0.9976 | 0.0202 |
| MFNG       | 0.9001 | 1.1477 | 1.0651 | 0.8777 | 0.9976 | 0.0652 |
| DENND1C    | 0.9718 | 1.1640 | 1.0666 | 0.7881 | 0.9976 | 0.0801 |
| FBXL4      | 0.9988 | 1.0697 | 1.0021 | 0.9201 | 0.9977 | 0.0306 |
| SPOCD1     | 0.9398 | 1.0687 | 1.0781 | 0.9041 | 0.9977 | 0.0444 |
| LOC1001342 | 0.9323 | 1.1018 | 1.0524 | 0.9041 | 0.9977 | 0.0473 |
| LOC642312  | 0.9135 | 1.1410 | 1.0927 | 0.8434 | 0.9977 | 0.0710 |
| MIR134     | 0.9048 | 1.1467 | 0.9286 | 1.0105 | 0.9977 | 0.0546 |
| LOC1001298 | 1.0295 | 1.0445 | 1.0245 | 0.8922 | 0.9977 | 0.0354 |
| SLC16A6    | 0.9303 | 1.1957 | 1.0812 | 0.7834 | 0.9977 | 0.0897 |
| DSG3       | 1.0194 | 1.0754 | 0.9391 | 0.9568 | 0.9977 | 0.0311 |
| LOC1001293 | 0.9659 | 1.1388 | 1.0562 | 0.8298 | 0.9977 | 0.0662 |
| USHBP1     | 0.9898 | 1.0613 | 1.0013 | 0.9383 | 0.9977 | 0.0252 |
| LOC649337  | 0.9607 | 1.0306 | 1.0288 | 0.9706 | 0.9977 | 0.0186 |
| LOC201175  | 0.9243 | 1.1750 | 0.9761 | 0.9154 | 0.9977 | 0.0606 |
| C3orf30    | 0.9435 | 1.0490 | 1.0959 | 0.9024 | 0.9977 | 0.0450 |

|            |        |        |        |        |        |        |
|------------|--------|--------|--------|--------|--------|--------|
| LOC441584  | 0.9903 | 0.9515 | 1.2039 | 0.8451 | 0.9977 | 0.0753 |
| NIPBL      | 0.9153 | 1.2732 | 0.9968 | 0.8056 | 0.9977 | 0.0998 |
| LOC647210  | 0.9007 | 1.2022 | 1.0392 | 0.8488 | 0.9977 | 0.0791 |
| OC90       | 0.9155 | 1.0672 | 1.1355 | 0.8727 | 0.9977 | 0.0621 |
| CREG2      | 0.9894 | 1.1258 | 0.9887 | 0.8870 | 0.9977 | 0.0490 |
| IFNA14     | 1.0022 | 1.0496 | 1.0210 | 0.9181 | 0.9977 | 0.0283 |
| ARVCF      | 1.0000 | 1.1884 | 0.9271 | 0.8754 | 0.9977 | 0.0685 |
| STARD5     | 0.8878 | 1.2141 | 1.0626 | 0.8264 | 0.9977 | 0.0878 |
| CASP6      | 0.9721 | 1.1030 | 1.0680 | 0.8479 | 0.9977 | 0.0571 |
| OR12D3     | 0.9262 | 1.0969 | 1.1016 | 0.8663 | 0.9977 | 0.0599 |
| FLJ27365   | 1.1378 | 1.1599 | 0.9260 | 0.7673 | 0.9977 | 0.0932 |
| CDAN1      | 0.9163 | 1.2579 | 0.9928 | 0.8240 | 0.9977 | 0.0933 |
| LOC644695  | 0.9838 | 1.0770 | 1.0340 | 0.8962 | 0.9978 | 0.0388 |
| STS-1      | 0.8804 | 1.0473 | 1.0505 | 1.0128 | 0.9978 | 0.0400 |
| OR4X2      | 0.9911 | 1.0403 | 1.0407 | 0.9190 | 0.9978 | 0.0287 |
| FNDC1      | 1.0472 | 1.0674 | 0.9632 | 0.9133 | 0.9978 | 0.0361 |
| LOC728764  | 1.0262 | 1.0468 | 0.9884 | 0.9296 | 0.9978 | 0.0257 |
| LOC441179  | 0.9147 | 1.0472 | 1.0831 | 0.9460 | 0.9978 | 0.0401 |
| NRP2       | 0.9550 | 1.0488 | 1.0166 | 0.9708 | 0.9978 | 0.0214 |
| FLJ36777   | 0.9053 | 1.0000 | 1.1278 | 0.9580 | 0.9978 | 0.0475 |
| SLC4A3     | 1.0203 | 1.1404 | 0.9807 | 0.8498 | 0.9978 | 0.0599 |
| ANO5       | 1.0470 | 1.0737 | 0.9800 | 0.8904 | 0.9978 | 0.0409 |
| MTPAP      | 0.9537 | 1.1149 | 1.0365 | 0.8861 | 0.9978 | 0.0497 |
| LOC643227  | 1.0429 | 0.9375 | 1.0674 | 0.9435 | 0.9978 | 0.0335 |
| PRAMEF10   | 0.9025 | 1.0989 | 1.0204 | 0.9694 | 0.9978 | 0.0414 |
| ZNF510     | 0.8805 | 1.1658 | 1.0496 | 0.8953 | 0.9978 | 0.0678 |
| ZNF517     | 0.9330 | 1.1586 | 1.0337 | 0.8659 | 0.9978 | 0.0637 |
| LOC730249  | 0.9624 | 1.0786 | 1.0408 | 0.9094 | 0.9978 | 0.0381 |
| PYDC2      | 0.9391 | 1.0675 | 1.0494 | 0.9352 | 0.9978 | 0.0352 |
| ZNF807     | 0.9531 | 1.0671 | 1.1153 | 0.8558 | 0.9978 | 0.0583 |
| LOC1001314 | 1.0989 | 0.9452 | 0.9857 | 0.9615 | 0.9978 | 0.0347 |
| KIF6       | 0.9901 | 1.1181 | 0.8512 | 1.0318 | 0.9978 | 0.0557 |
| MGC10701   | 0.8871 | 1.1349 | 1.0195 | 0.9498 | 0.9978 | 0.0531 |
| C3         | 0.9676 | 1.1220 | 1.0560 | 0.8457 | 0.9978 | 0.0598 |
| LOC283152  | 1.0250 | 1.0104 | 1.0531 | 0.9029 | 0.9978 | 0.0329 |
| LOC646607  | 0.8646 | 1.0677 | 1.1039 | 0.9553 | 0.9979 | 0.0545 |
| LOC730256  | 0.8957 | 1.1513 | 1.1552 | 0.7891 | 0.9979 | 0.0923 |
| MIR2276    | 1.0243 | 0.9124 | 1.0321 | 1.0227 | 0.9979 | 0.0286 |
| MIR940     | 0.9007 | 1.1239 | 1.0397 | 0.9272 | 0.9979 | 0.0517 |
| LOC645321  | 0.9499 | 1.0458 | 1.0312 | 0.9646 | 0.9979 | 0.0238 |
| LOC1001337 | 0.9765 | 1.0167 | 1.0329 | 0.9654 | 0.9979 | 0.0160 |
| PDRG1      | 0.8043 | 1.4868 | 0.9620 | 0.7384 | 0.9979 | 0.1696 |
| FABP5L7    | 0.9610 | 1.0891 | 0.9683 | 0.9731 | 0.9979 | 0.0305 |
| LOC650631  | 1.0112 | 1.0691 | 0.9575 | 0.9537 | 0.9979 | 0.0271 |
| LOC1001322 | 0.8579 | 1.1821 | 1.0288 | 0.9228 | 0.9979 | 0.0708 |
| CENTD1     | 0.8748 | 1.1120 | 1.0847 | 0.9201 | 0.9979 | 0.0590 |

|            |        |        |        |        |        |        |
|------------|--------|--------|--------|--------|--------|--------|
| WIPF1      | 0.9465 | 1.0638 | 1.0058 | 0.9754 | 0.9979 | 0.0251 |
| LOC649963  | 0.9446 | 1.1886 | 1.0032 | 0.8552 | 0.9979 | 0.0705 |
| RNF190     | 1.0252 | 1.0252 | 1.0234 | 0.9178 | 0.9979 | 0.0267 |
| ATCAY      | 0.8899 | 1.1327 | 1.0864 | 0.8825 | 0.9979 | 0.0652 |
| DMBT1      | 0.9422 | 1.1080 | 1.0098 | 0.9316 | 0.9979 | 0.0406 |
| ADAMTS10   | 1.0792 | 1.0986 | 0.9581 | 0.8557 | 0.9979 | 0.0567 |
| LOC648605  | 0.8893 | 1.1399 | 1.0621 | 0.9003 | 0.9979 | 0.0617 |
| LOC646519  | 0.9214 | 1.1051 | 1.0221 | 0.9430 | 0.9979 | 0.0418 |
| MUPCDH     | 0.9109 | 1.1351 | 1.0548 | 0.8909 | 0.9979 | 0.0585 |
| DHCR7      | 0.8788 | 1.4881 | 0.9597 | 0.6651 | 0.9979 | 0.1748 |
| LOC648138  | 1.0026 | 1.0510 | 1.0669 | 0.8712 | 0.9979 | 0.0444 |
| SIX2       | 0.9274 | 1.0122 | 1.2022 | 0.8499 | 0.9979 | 0.0757 |
| LOC1001322 | 0.9634 | 1.0741 | 1.0217 | 0.9326 | 0.9979 | 0.0314 |
| RFPL1S     | 0.8479 | 1.1277 | 1.0338 | 0.9823 | 0.9979 | 0.0584 |
| LOC728196  | 0.9507 | 1.0879 | 0.9701 | 0.9830 | 0.9979 | 0.0307 |
| LOC647650  | 0.9080 | 1.1585 | 1.0733 | 0.8519 | 0.9979 | 0.0712 |
| LOC653746  | 0.9886 | 1.1241 | 0.9250 | 0.9540 | 0.9979 | 0.0440 |
| NPM2       | 0.9349 | 1.0620 | 1.1198 | 0.8750 | 0.9979 | 0.0563 |
| LOC1001280 | 0.9254 | 1.0613 | 1.0029 | 1.0022 | 0.9979 | 0.0279 |
| LOC728767  | 0.9807 | 1.0108 | 1.0356 | 0.9647 | 0.9979 | 0.0158 |
| FAM35A     | 0.9804 | 1.1907 | 1.0181 | 0.8025 | 0.9979 | 0.0796 |
| LOC390387  | 0.9226 | 1.0733 | 1.0463 | 0.9496 | 0.9980 | 0.0366 |
| LOC729061  | 0.9173 | 1.1520 | 0.9795 | 0.9431 | 0.9980 | 0.0529 |
| LOC650217  | 1.1025 | 1.0424 | 1.0054 | 0.8417 | 0.9980 | 0.0558 |
| LOC121296  | 0.9419 | 1.0850 | 1.0466 | 0.9184 | 0.9980 | 0.0402 |
| HBBP1      | 0.9526 | 1.0557 | 1.1072 | 0.8764 | 0.9980 | 0.0517 |
| KCND1      | 0.8747 | 1.1246 | 1.0376 | 0.9551 | 0.9980 | 0.0537 |
| APOBEC3A   | 0.9353 | 1.1010 | 1.0359 | 0.9198 | 0.9980 | 0.0429 |
| ERAS       | 0.9661 | 1.1166 | 1.0375 | 0.8718 | 0.9980 | 0.0521 |
| NRG2       | 0.9069 | 1.1000 | 1.0644 | 0.9207 | 0.9980 | 0.0492 |
| LOC92154   | 0.9926 | 1.1171 | 0.9611 | 0.9213 | 0.9980 | 0.0423 |
| MGAT5B     | 0.9771 | 1.0443 | 1.0749 | 0.8957 | 0.9980 | 0.0397 |
| RB1        | 0.8081 | 1.4216 | 0.9670 | 0.7953 | 0.9980 | 0.1465 |
| LOC1001336 | 0.9486 | 1.0297 | 1.0557 | 0.9581 | 0.9980 | 0.0264 |
| MEGF8      | 0.9390 | 1.1035 | 1.0667 | 0.8829 | 0.9980 | 0.0521 |
| C8orf12    | 0.9169 | 1.1407 | 1.0078 | 0.9267 | 0.9980 | 0.0517 |
| LOC728088  | 0.9129 | 1.1147 | 1.0255 | 0.9390 | 0.9980 | 0.0457 |
| LOC644999  | 1.0593 | 1.2231 | 0.9236 | 0.7862 | 0.9980 | 0.0935 |
| BBX        | 0.8643 | 1.4526 | 0.9835 | 0.6918 | 0.9981 | 0.1629 |
| CAPN14     | 0.9462 | 1.2112 | 0.9819 | 0.8530 | 0.9981 | 0.0761 |
| LOC283116  | 0.9756 | 1.0814 | 1.0320 | 0.9032 | 0.9981 | 0.0383 |
| RUFY4      | 0.9624 | 1.0706 | 1.0528 | 0.9065 | 0.9981 | 0.0386 |
| ROBO2      | 0.9407 | 1.1052 | 1.0310 | 0.9154 | 0.9981 | 0.0435 |
| LOC646260  | 0.9322 | 1.0721 | 1.0345 | 0.9535 | 0.9981 | 0.0331 |
| LOC1001281 | 0.8191 | 1.2284 | 1.0214 | 0.9234 | 0.9981 | 0.0872 |
| FMO1       | 1.0328 | 0.8893 | 1.0684 | 1.0018 | 0.9981 | 0.0387 |

|            |        |        |        |        |        |        |
|------------|--------|--------|--------|--------|--------|--------|
| TRIM72     | 1.0840 | 0.9946 | 0.8295 | 1.0842 | 0.9981 | 0.0600 |
| LOC653123  | 1.0750 | 1.0059 | 1.0221 | 0.8893 | 0.9981 | 0.0392 |
| LOC653764  | 0.9496 | 1.1386 | 1.0680 | 0.8362 | 0.9981 | 0.0666 |
| LOC646047  | 0.8951 | 1.0932 | 1.0466 | 0.9576 | 0.9981 | 0.0444 |
| ADD2       | 0.9749 | 1.0892 | 1.0369 | 0.8915 | 0.9981 | 0.0425 |
| LOC644390  | 0.9416 | 1.1128 | 1.1023 | 0.8358 | 0.9981 | 0.0668 |
| TSN        | 0.9675 | 1.0814 | 1.0160 | 0.9276 | 0.9981 | 0.0331 |
| FBXO44     | 0.9447 | 1.0998 | 1.0097 | 0.9384 | 0.9981 | 0.0375 |
| MIR548C    | 0.8671 | 1.1373 | 1.0160 | 0.9721 | 0.9981 | 0.0559 |
| LOC392522  | 0.9125 | 1.0489 | 1.1511 | 0.8801 | 0.9981 | 0.0627 |
| NCF4       | 0.9920 | 1.0501 | 1.0172 | 0.9334 | 0.9981 | 0.0247 |
| MIR575     | 0.9568 | 1.0954 | 1.0307 | 0.9098 | 0.9981 | 0.0409 |
| UCMA       | 0.8861 | 1.0879 | 1.0684 | 0.9502 | 0.9982 | 0.0482 |
| PDCL2      | 0.9205 | 1.0928 | 0.9855 | 0.9938 | 0.9982 | 0.0355 |
| LOC645373  | 0.9858 | 1.0427 | 1.0423 | 0.9219 | 0.9982 | 0.0287 |
| KRTAP4-3   | 0.9841 | 1.0783 | 1.0607 | 0.8695 | 0.9982 | 0.0475 |
| IL28A      | 0.9954 | 1.0434 | 1.0802 | 0.8737 | 0.9982 | 0.0450 |
| IL11RA     | 0.9791 | 1.1376 | 1.0039 | 0.8721 | 0.9982 | 0.0546 |
| SPRY3      | 0.9308 | 1.0341 | 1.0347 | 0.9931 | 0.9982 | 0.0245 |
| INPP1      | 0.8773 | 1.1636 | 0.9860 | 0.9659 | 0.9982 | 0.0600 |
| C1orf27    | 0.9389 | 1.0619 | 1.0279 | 0.9641 | 0.9982 | 0.0283 |
| LOC727788  | 0.9545 | 1.0251 | 1.0561 | 0.9571 | 0.9982 | 0.0253 |
| FAM179B    | 0.9311 | 1.2196 | 1.0518 | 0.7904 | 0.9982 | 0.0911 |
| AGPAT9     | 0.9630 | 1.1498 | 1.0332 | 0.8469 | 0.9982 | 0.0635 |
| GJA5       | 0.9957 | 1.1213 | 0.9792 | 0.8967 | 0.9982 | 0.0464 |
| TRIM67     | 1.0366 | 1.0256 | 1.0130 | 0.9177 | 0.9982 | 0.0273 |
| RESP18     | 0.9694 | 1.0945 | 0.9533 | 0.9757 | 0.9982 | 0.0324 |
| LOC441193  | 1.0601 | 0.9818 | 0.9179 | 1.0332 | 0.9982 | 0.0313 |
| LOC651096  | 1.0547 | 1.0734 | 1.0188 | 0.8461 | 0.9982 | 0.0520 |
| ATP9B      | 0.9180 | 1.1912 | 1.0333 | 0.8505 | 0.9982 | 0.0746 |
| GSTZ1      | 0.8448 | 1.2068 | 1.0606 | 0.8808 | 0.9983 | 0.0840 |
| LOC284749  | 0.9025 | 1.1320 | 1.0013 | 0.9571 | 0.9983 | 0.0490 |
| LONRF2     | 0.9246 | 1.1085 | 0.9957 | 0.9642 | 0.9983 | 0.0395 |
| NR5A2      | 0.9511 | 1.0087 | 1.0833 | 0.9498 | 0.9983 | 0.0315 |
| LOC653217  | 0.9468 | 1.0933 | 1.0456 | 0.9073 | 0.9983 | 0.0430 |
| PLK3       | 0.9480 | 1.1087 | 0.9789 | 0.9575 | 0.9983 | 0.0374 |
| LOC641805  | 1.0003 | 1.0525 | 0.9999 | 0.9404 | 0.9983 | 0.0229 |
| LOC728119  | 0.9224 | 1.2369 | 0.9701 | 0.8637 | 0.9983 | 0.0825 |
| LOC645737  | 0.9862 | 1.0857 | 1.1342 | 0.7870 | 0.9983 | 0.0769 |
| LOC652697  | 1.0326 | 1.0904 | 1.0688 | 0.8014 | 0.9983 | 0.0667 |
| LOC442117  | 0.9271 | 1.1083 | 0.9853 | 0.9725 | 0.9983 | 0.0387 |
| LOC648527  | 0.9914 | 1.0604 | 1.0536 | 0.8878 | 0.9983 | 0.0400 |
| LOC644646  | 0.9869 | 0.9825 | 1.1080 | 0.9158 | 0.9983 | 0.0400 |
| TNRC15     | 1.0279 | 1.2356 | 0.9369 | 0.7929 | 0.9983 | 0.0927 |
| LOC649034  | 1.0659 | 1.1161 | 0.8480 | 0.9632 | 0.9983 | 0.0593 |
| LOC1001323 | 1.0088 | 1.0122 | 1.0663 | 0.9059 | 0.9983 | 0.0335 |

|            |        |        |        |        |        |        |
|------------|--------|--------|--------|--------|--------|--------|
| ERCC-00092 | 0.9320 | 1.1483 | 1.0481 | 0.8649 | 0.9983 | 0.0627 |
| LOC1001296 | 1.0025 | 1.1312 | 1.0203 | 0.8392 | 0.9983 | 0.0602 |
| LOC647254  | 1.0267 | 1.1487 | 0.9801 | 0.8380 | 0.9983 | 0.0642 |
| FXN        | 1.0213 | 1.0154 | 1.0948 | 0.8619 | 0.9984 | 0.0489 |
| SPDEF      | 1.1244 | 1.1488 | 0.9342 | 0.7860 | 0.9984 | 0.0855 |
| LOC645712  | 1.0935 | 1.0102 | 0.9665 | 0.9233 | 0.9984 | 0.0363 |
| ARF6       | 0.8395 | 1.1187 | 1.0460 | 0.9893 | 0.9984 | 0.0592 |
| LOC1001347 | 1.0040 | 1.0536 | 1.0306 | 0.9053 | 0.9984 | 0.0326 |
| IGFL3      | 0.9462 | 1.1056 | 0.9273 | 1.0143 | 0.9984 | 0.0403 |
| LOC648153  | 1.0756 | 1.0144 | 0.9477 | 0.9559 | 0.9984 | 0.0297 |
| PCDHAC1    | 0.9349 | 1.0266 | 1.0341 | 0.9980 | 0.9984 | 0.0226 |
| ANXA11     | 0.8478 | 1.2877 | 0.9780 | 0.8800 | 0.9984 | 0.1003 |
| LOC653043  | 1.0632 | 1.1342 | 0.9336 | 0.8625 | 0.9984 | 0.0614 |
| FGF14      | 0.9604 | 1.1002 | 1.0048 | 0.9281 | 0.9984 | 0.0374 |
| CNNM4      | 0.9668 | 1.1852 | 1.0149 | 0.8268 | 0.9984 | 0.0739 |
| LOC646064  | 0.8966 | 1.1297 | 1.0789 | 0.8885 | 0.9984 | 0.0620 |
| LOC653427  | 1.0613 | 1.0730 | 1.0429 | 0.8164 | 0.9984 | 0.0610 |
| MIR374B    | 1.0304 | 1.1044 | 0.9825 | 0.8764 | 0.9984 | 0.0478 |
| LOC646029  | 0.9878 | 1.1350 | 1.0051 | 0.8658 | 0.9984 | 0.0551 |
| SNORD109A  | 1.0180 | 0.9675 | 1.1257 | 0.8825 | 0.9984 | 0.0508 |
| LOC1001290 | 0.9446 | 1.0713 | 1.0261 | 0.9519 | 0.9984 | 0.0305 |
| PADI1      | 0.9588 | 1.1166 | 1.0499 | 0.8685 | 0.9984 | 0.0541 |
| LOC652710  | 0.9583 | 1.0408 | 1.0627 | 0.9321 | 0.9985 | 0.0315 |
| LOC1001295 | 0.8527 | 1.1172 | 1.3078 | 0.7162 | 0.9985 | 0.1325 |
| LOC1001297 | 0.9324 | 1.0758 | 1.0457 | 0.9400 | 0.9985 | 0.0365 |
| HCG27      | 0.9531 | 1.0986 | 1.0294 | 0.9128 | 0.9985 | 0.0412 |
| AANAT      | 1.0567 | 1.0565 | 0.9685 | 0.9123 | 0.9985 | 0.0355 |
| LRRC3B     | 0.9949 | 1.0152 | 1.0104 | 0.9734 | 0.9985 | 0.0094 |
| CALCA      | 0.9126 | 1.1199 | 1.0357 | 0.9258 | 0.9985 | 0.0490 |
| DEFB125    | 0.8925 | 1.2256 | 0.9565 | 0.9194 | 0.9985 | 0.0768 |
| LOC654346  | 0.9663 | 1.1064 | 1.0629 | 0.8585 | 0.9985 | 0.0551 |
| LOC388282  | 1.0353 | 1.1053 | 0.9818 | 0.8716 | 0.9985 | 0.0493 |
| GLP1R      | 0.8995 | 1.0831 | 1.0180 | 0.9935 | 0.9985 | 0.0380 |
| LOC647515  | 0.9594 | 1.1487 | 0.9839 | 0.9021 | 0.9985 | 0.0529 |
| LOC646272  | 0.9331 | 1.0717 | 1.1319 | 0.8574 | 0.9985 | 0.0628 |
| RNASE12    | 0.9826 | 1.0584 | 1.0129 | 0.9404 | 0.9985 | 0.0249 |
| LOC1001336 | 0.9070 | 1.2261 | 1.0382 | 0.8229 | 0.9986 | 0.0878 |
| SMYD1      | 0.9787 | 1.0697 | 1.0901 | 0.8558 | 0.9986 | 0.0534 |
| BTBD15     | 0.9359 | 1.0915 | 0.9756 | 0.9913 | 0.9986 | 0.0331 |
| LOC651361  | 0.8836 | 1.1001 | 1.0686 | 0.9420 | 0.9986 | 0.0513 |
| LMO1       | 0.9090 | 1.1243 | 1.0532 | 0.9078 | 0.9986 | 0.0540 |
| RNF217     | 0.9889 | 1.0154 | 1.0370 | 0.9531 | 0.9986 | 0.0181 |
| LOC392008  | 1.0621 | 1.0617 | 0.9842 | 0.8862 | 0.9986 | 0.0417 |
| FLJ45966   | 0.8711 | 1.1186 | 1.0876 | 0.9171 | 0.9986 | 0.0614 |
| CAPN12     | 1.0033 | 1.0753 | 1.0375 | 0.8783 | 0.9986 | 0.0427 |
| LOC729623  | 0.9486 | 1.1383 | 0.9617 | 0.9458 | 0.9986 | 0.0467 |



|            |        |        |        |        |        |        |
|------------|--------|--------|--------|--------|--------|--------|
| LOC1001319 | 1.0426 | 1.0701 | 1.0002 | 0.8815 | 0.9986 | 0.0416 |
| CHMP4C     | 0.8992 | 1.1545 | 1.2331 | 0.7077 | 0.9986 | 0.1204 |
| MIR302C    | 0.9433 | 1.1081 | 0.9789 | 0.9642 | 0.9986 | 0.0372 |
| OR5L1      | 0.9884 | 1.0645 | 1.0002 | 0.9413 | 0.9986 | 0.0254 |
| FAM90A8    | 0.9764 | 1.0887 | 0.9722 | 0.9571 | 0.9986 | 0.0303 |
| CABYR      | 0.9278 | 1.1321 | 0.9991 | 0.9356 | 0.9987 | 0.0473 |
| LOC391727  | 0.9197 | 1.1099 | 1.0832 | 0.8818 | 0.9987 | 0.0573 |
| MIR1290    | 1.0072 | 1.1710 | 0.9025 | 0.9140 | 0.9987 | 0.0620 |
| GSTTP1     | 1.0704 | 1.1102 | 0.9378 | 0.8764 | 0.9987 | 0.0549 |
| BARX1      | 0.8924 | 1.2266 | 1.0586 | 0.8170 | 0.9987 | 0.0912 |
| TSSK6      | 1.0460 | 1.0697 | 1.0466 | 0.8324 | 0.9987 | 0.0557 |
| SAMD4B     | 0.9554 | 1.3312 | 0.9173 | 0.7908 | 0.9987 | 0.1163 |
| LOC647544  | 0.9890 | 1.0190 | 1.0333 | 0.9534 | 0.9987 | 0.0177 |
| SFTPB      | 0.9014 | 1.1367 | 1.0234 | 0.9332 | 0.9987 | 0.0528 |
| RGS5       | 0.9793 | 1.0452 | 1.0483 | 0.9219 | 0.9987 | 0.0301 |
| LOC388882  | 0.8883 | 1.1100 | 1.0456 | 0.9508 | 0.9987 | 0.0492 |
| C11orf76   | 0.9183 | 1.0563 | 1.0643 | 0.9559 | 0.9987 | 0.0364 |
| TEX14      | 1.0083 | 1.0423 | 0.9820 | 0.9622 | 0.9987 | 0.0173 |
| SPSB4      | 0.9220 | 1.1216 | 1.0833 | 0.8680 | 0.9987 | 0.0614 |
| IFNW1      | 0.9665 | 1.0664 | 1.0128 | 0.9491 | 0.9987 | 0.0263 |
| ITSN1      | 0.9403 | 1.3872 | 0.8916 | 0.7757 | 0.9987 | 0.1340 |
| LOC641767  | 0.9237 | 1.1119 | 1.0140 | 0.9452 | 0.9987 | 0.0424 |
| KHDC1L     | 0.9813 | 1.1164 | 0.9357 | 0.9615 | 0.9987 | 0.0403 |
| DCT        | 1.0136 | 1.0725 | 0.9411 | 0.9677 | 0.9987 | 0.0288 |
| HOXA7      | 0.8657 | 1.0629 | 1.0751 | 0.9911 | 0.9987 | 0.0480 |
| LOC729629  | 0.9379 | 1.1011 | 1.0347 | 0.9212 | 0.9987 | 0.0423 |
| RSPO4      | 0.9602 | 1.0626 | 0.9948 | 0.9773 | 0.9987 | 0.0224 |
| LOC647596  | 0.8776 | 1.2552 | 0.9423 | 0.9198 | 0.9987 | 0.0865 |
| MIR1468    | 0.9801 | 1.0765 | 1.0275 | 0.9107 | 0.9987 | 0.0353 |
| LOC642516  | 0.9701 | 1.1315 | 0.9878 | 0.9054 | 0.9987 | 0.0477 |
| CNN3       | 0.9362 | 1.0487 | 1.0521 | 0.9580 | 0.9987 | 0.0302 |
| PNMT       | 0.8785 | 1.1453 | 1.0462 | 0.9250 | 0.9987 | 0.0603 |
| LOC441320  | 0.9082 | 1.2380 | 0.9738 | 0.8748 | 0.9987 | 0.0824 |
| LOC158730  | 0.9400 | 1.1108 | 1.0744 | 0.8698 | 0.9987 | 0.0565 |
| OR2A1      | 0.9810 | 1.0885 | 1.0818 | 0.8438 | 0.9988 | 0.0572 |
| LOC644377  | 0.8708 | 1.1954 | 1.0222 | 0.9066 | 0.9988 | 0.0731 |
| LOC284998  | 0.8264 | 1.1490 | 1.1757 | 0.8440 | 0.9988 | 0.0947 |
| FLJ46230   | 0.9445 | 1.0148 | 1.0498 | 0.9859 | 0.9988 | 0.0223 |
| OSTN       | 0.9075 | 1.1088 | 1.0335 | 0.9453 | 0.9988 | 0.0452 |
| ZC3H11B    | 0.9981 | 1.2651 | 1.0385 | 0.6935 | 0.9988 | 0.1175 |
| C1orf175   | 0.9103 | 1.0645 | 1.0668 | 0.9535 | 0.9988 | 0.0396 |
| CTDP1      | 0.8678 | 1.2604 | 1.0485 | 0.8185 | 0.9988 | 0.1002 |
| B4GALT6    | 1.0395 | 0.9945 | 1.0768 | 0.8844 | 0.9988 | 0.0417 |
| ZIC4       | 0.9529 | 1.1010 | 0.9864 | 0.9549 | 0.9988 | 0.0349 |
| AMT        | 1.0549 | 0.9798 | 0.9891 | 0.9714 | 0.9988 | 0.0190 |
| LONRF3     | 1.0408 | 1.0151 | 1.0542 | 0.8850 | 0.9988 | 0.0388 |

|            |        |        |        |        |        |        |
|------------|--------|--------|--------|--------|--------|--------|
| LOC652809  | 0.9003 | 1.1810 | 0.9980 | 0.9159 | 0.9988 | 0.0644 |
| LOC728460  | 0.9429 | 1.0824 | 0.9653 | 1.0047 | 0.9988 | 0.0307 |
| LOC1001301 | 1.0108 | 1.0944 | 1.0548 | 0.8352 | 0.9988 | 0.0571 |
| LOC650148  | 0.8871 | 1.0354 | 1.1113 | 0.9614 | 0.9988 | 0.0482 |
| CDH17      | 0.8941 | 1.1108 | 1.0570 | 0.9334 | 0.9988 | 0.0510 |
| LOC652625  | 0.9158 | 1.1120 | 1.0096 | 0.9580 | 0.9988 | 0.0423 |
| LOC644043  | 1.0331 | 1.0746 | 1.0290 | 0.8585 | 0.9988 | 0.0479 |
| PSD2       | 0.8695 | 1.2048 | 1.0597 | 0.8613 | 0.9988 | 0.0825 |
| LOC1001280 | 0.9178 | 1.1067 | 1.0214 | 0.9494 | 0.9988 | 0.0420 |
| TRPC6      | 0.9469 | 1.0263 | 1.1084 | 0.9137 | 0.9988 | 0.0435 |
| LOC650368  | 0.9600 | 1.0725 | 1.0809 | 0.8820 | 0.9988 | 0.0477 |
| ABCC4      | 0.8732 | 1.3198 | 1.0771 | 0.7253 | 0.9988 | 0.1290 |
| C17orf64   | 0.8487 | 1.1255 | 1.0681 | 0.9530 | 0.9989 | 0.0616 |
| LOC1001298 | 0.9331 | 1.0779 | 1.0623 | 0.9221 | 0.9989 | 0.0413 |
| TPH1       | 0.8693 | 1.1350 | 1.1124 | 0.8787 | 0.9989 | 0.0723 |
| GMFG       | 0.8550 | 1.1769 | 1.0996 | 0.8640 | 0.9989 | 0.0820 |
| C15orf41   | 1.0228 | 1.0865 | 1.0237 | 0.8624 | 0.9989 | 0.0479 |
| LOC196549  | 0.9216 | 1.1671 | 0.9640 | 0.9427 | 0.9989 | 0.0567 |
| SPOCK2     | 0.8621 | 1.1829 | 1.0336 | 0.9169 | 0.9989 | 0.0710 |
| LOC1001318 | 0.8667 | 1.1396 | 1.0687 | 0.9205 | 0.9989 | 0.0634 |
| BMP8B      | 0.8951 | 1.1025 | 0.9905 | 1.0074 | 0.9989 | 0.0425 |
| ANXA8      | 1.0334 | 1.0771 | 0.9882 | 0.8968 | 0.9989 | 0.0386 |
| BTC        | 0.9145 | 1.2165 | 0.9787 | 0.8859 | 0.9989 | 0.0751 |
| ARGFX      | 1.0278 | 1.0684 | 0.9751 | 0.9243 | 0.9989 | 0.0314 |
| MXD1       | 1.0225 | 1.1802 | 0.9862 | 0.8067 | 0.9989 | 0.0767 |
| LOC650009  | 0.9673 | 1.0036 | 1.1221 | 0.9026 | 0.9989 | 0.0461 |
| LOC646676  | 0.9505 | 1.0475 | 1.0740 | 0.9237 | 0.9989 | 0.0365 |
| SLC5A5     | 0.9507 | 1.0543 | 1.0030 | 0.9877 | 0.9989 | 0.0215 |
| SGCZ       | 0.8745 | 1.1547 | 1.0236 | 0.9429 | 0.9989 | 0.0602 |
| KRTAP5-11  | 0.9152 | 1.0618 | 1.0904 | 0.9283 | 0.9989 | 0.0450 |
| MID1       | 0.9700 | 1.1713 | 0.9853 | 0.8691 | 0.9989 | 0.0630 |
| LOC348021  | 0.9209 | 1.1007 | 0.9186 | 1.0554 | 0.9989 | 0.0466 |
| LOC645644  | 1.0146 | 1.0458 | 0.9805 | 0.9549 | 0.9989 | 0.0198 |
| LOC340113  | 0.9506 | 1.0623 | 1.0582 | 0.9248 | 0.9990 | 0.0358 |
| SLC11A1    | 0.9350 | 1.0932 | 1.0202 | 0.9474 | 0.9990 | 0.0366 |
| SLC18A2    | 1.0016 | 1.0938 | 0.9351 | 0.9653 | 0.9990 | 0.0344 |
| LOC388248  | 0.9581 | 1.1531 | 1.0082 | 0.8765 | 0.9990 | 0.0581 |
| LOC728095  | 1.0639 | 0.9804 | 1.0565 | 0.8951 | 0.9990 | 0.0394 |
| LOC143941  | 0.9602 | 1.0784 | 1.0542 | 0.9032 | 0.9990 | 0.0409 |
| OPN5       | 0.9827 | 1.1872 | 0.9703 | 0.8557 | 0.9990 | 0.0690 |
| CAMK2N2    | 0.9646 | 1.0005 | 1.1115 | 0.9192 | 0.9990 | 0.0410 |
| SDCBP2     | 0.9495 | 1.0523 | 1.0719 | 0.9222 | 0.9990 | 0.0371 |
| MIR1271    | 0.9808 | 1.0913 | 1.0194 | 0.9045 | 0.9990 | 0.0389 |
| EDF1       | 0.9502 | 1.2168 | 1.1066 | 0.7224 | 0.9990 | 0.1072 |
| OR4D6      | 0.9744 | 1.1042 | 0.9959 | 0.9215 | 0.9990 | 0.0384 |
| LOC1001325 | 0.9219 | 1.1428 | 1.0308 | 0.9004 | 0.9990 | 0.0558 |

|            |        |        |        |        |        |        |
|------------|--------|--------|--------|--------|--------|--------|
| LOC1001324 | 0.9472 | 1.0192 | 1.0756 | 0.9539 | 0.9990 | 0.0303 |
| SVOP       | 1.1098 | 1.0032 | 0.9946 | 0.8885 | 0.9990 | 0.0452 |
| TOP3B      | 0.8794 | 1.2162 | 1.0812 | 0.8191 | 0.9990 | 0.0916 |
| MIR328     | 1.0329 | 1.0772 | 1.0344 | 0.8514 | 0.9990 | 0.0502 |
| MIR578     | 1.0384 | 0.9956 | 1.0726 | 0.8893 | 0.9990 | 0.0398 |
| C6orf142   | 0.9796 | 0.9965 | 1.0699 | 0.9501 | 0.9990 | 0.0255 |
| RD3        | 0.8068 | 1.2700 | 1.0294 | 0.8899 | 0.9990 | 0.1013 |
| LOC1001299 | 0.9813 | 1.0498 | 1.0286 | 0.9363 | 0.9990 | 0.0253 |
| RNF183     | 0.8931 | 1.1426 | 1.0892 | 0.8712 | 0.9990 | 0.0685 |
| ATP5B      | 0.8864 | 1.1757 | 1.0732 | 0.8607 | 0.9990 | 0.0756 |
| GJA8       | 1.0508 | 0.9862 | 1.1022 | 0.8568 | 0.9990 | 0.0530 |
| LOC1001315 | 0.9148 | 1.1982 | 1.0467 | 0.8364 | 0.9990 | 0.0793 |
| LOC653293  | 1.0189 | 1.0702 | 1.0418 | 0.8652 | 0.9990 | 0.0458 |
| ZNF423     | 0.9599 | 1.0981 | 1.0697 | 0.8684 | 0.9990 | 0.0527 |
| UBB        | 0.8697 | 1.3321 | 1.0402 | 0.7542 | 0.9990 | 0.1256 |
| CCDC147    | 0.9075 | 1.1099 | 1.0315 | 0.9472 | 0.9990 | 0.0451 |
| LOC1001328 | 1.0379 | 1.0773 | 1.0161 | 0.8649 | 0.9990 | 0.0465 |
| C15orf58   | 0.9553 | 1.1778 | 0.9566 | 0.9065 | 0.9990 | 0.0607 |
| LOC1002160 | 0.8915 | 1.1025 | 0.9888 | 1.0134 | 0.9991 | 0.0434 |
| SGSM1      | 0.9477 | 1.0925 | 1.0405 | 0.9155 | 0.9991 | 0.0409 |
| OR52N1     | 0.8766 | 1.0600 | 1.1640 | 0.8956 | 0.9991 | 0.0687 |
| KRT34      | 0.9501 | 1.0602 | 1.0844 | 0.9016 | 0.9991 | 0.0437 |
| BDH2       | 0.9494 | 1.1720 | 0.9753 | 0.8997 | 0.9991 | 0.0597 |
| GABRD      | 0.9142 | 1.1928 | 0.9676 | 0.9217 | 0.9991 | 0.0656 |
| SLC27A6    | 0.8711 | 1.1633 | 1.0471 | 0.9149 | 0.9991 | 0.0663 |
| SNAP47     | 0.8561 | 1.3991 | 0.9369 | 0.8042 | 0.9991 | 0.1361 |
| LOC644672  | 0.9304 | 1.1631 | 1.0274 | 0.8755 | 0.9991 | 0.0631 |
| OXGR1      | 1.0216 | 1.0032 | 1.0505 | 0.9211 | 0.9991 | 0.0278 |
| FLJ39061   | 0.9173 | 1.1339 | 1.0199 | 0.9253 | 0.9991 | 0.0506 |
| FAM53C     | 0.8830 | 1.3227 | 1.0477 | 0.7429 | 0.9991 | 0.1246 |
| CT45A5     | 0.9618 | 1.0221 | 1.0993 | 0.9132 | 0.9991 | 0.0401 |
| CCDC39     | 1.0009 | 1.0192 | 0.9606 | 1.0158 | 0.9991 | 0.0134 |
| OR56A1     | 0.9763 | 0.9836 | 1.0832 | 0.9533 | 0.9991 | 0.0288 |
| MAPT       | 0.9746 | 1.2080 | 0.9840 | 0.8299 | 0.9991 | 0.0780 |
| ART5       | 0.9927 | 1.1014 | 0.9241 | 0.9782 | 0.9991 | 0.0372 |
| LOC1001293 | 1.0334 | 1.0721 | 0.9941 | 0.8969 | 0.9991 | 0.0376 |
| LOC644402  | 0.9109 | 1.1300 | 1.0828 | 0.8728 | 0.9991 | 0.0632 |
| C16orf78   | 1.0106 | 1.1314 | 0.9926 | 0.8618 | 0.9991 | 0.0552 |
| ACSM5      | 0.9493 | 1.0803 | 1.0352 | 0.9317 | 0.9991 | 0.0353 |
| MIR1322    | 0.9941 | 1.0815 | 0.9998 | 0.9211 | 0.9991 | 0.0328 |
| SH3RF1     | 0.8735 | 1.3588 | 1.0788 | 0.6854 | 0.9991 | 0.1443 |
| LOC196120  | 0.9701 | 1.0660 | 1.0915 | 0.8689 | 0.9991 | 0.0507 |
| OR51A4     | 0.9543 | 1.1282 | 0.9446 | 0.9694 | 0.9991 | 0.0433 |
| OR11L1     | 0.8967 | 1.0428 | 1.1208 | 0.9363 | 0.9991 | 0.0509 |
| T-SP1      | 0.9650 | 1.2245 | 0.9708 | 0.8363 | 0.9991 | 0.0813 |
| LOC93556   | 1.0077 | 0.8801 | 1.1037 | 1.0051 | 0.9992 | 0.0458 |

|            |        |        |        |        |        |        |
|------------|--------|--------|--------|--------|--------|--------|
| FLJ35429   | 0.9133 | 1.0741 | 1.2139 | 0.7954 | 0.9992 | 0.0916 |
| HGFAC      | 0.9208 | 1.1278 | 1.0202 | 0.9278 | 0.9992 | 0.0485 |
| RHOH       | 1.0218 | 1.0228 | 1.0450 | 0.9071 | 0.9992 | 0.0312 |
| KERA       | 0.9058 | 1.1329 | 1.0604 | 0.8977 | 0.9992 | 0.0582 |
| LOC650836  | 0.9521 | 1.0966 | 1.0245 | 0.9235 | 0.9992 | 0.0388 |
| LOC649477  | 1.0241 | 1.0507 | 1.0473 | 0.8746 | 0.9992 | 0.0420 |
| LOC651864  | 0.9347 | 1.1051 | 1.0124 | 0.9445 | 0.9992 | 0.0393 |
| MSMB       | 0.9637 | 1.0670 | 1.0239 | 0.9421 | 0.9992 | 0.0285 |
| NT5C2      | 0.8634 | 1.4354 | 1.0529 | 0.6452 | 0.9992 | 0.1676 |
| LOC441548  | 0.9704 | 0.9446 | 1.1408 | 0.9409 | 0.9992 | 0.0477 |
| MIR133B    | 0.9995 | 0.9177 | 1.0491 | 1.0304 | 0.9992 | 0.0290 |
| KLHL7      | 0.9639 | 1.1636 | 1.0791 | 0.7903 | 0.9992 | 0.0808 |
| DPYSL4     | 0.9558 | 1.2600 | 1.0273 | 0.7538 | 0.9992 | 0.1045 |
| LOC1001324 | 0.9166 | 1.0547 | 1.1485 | 0.8771 | 0.9992 | 0.0627 |
| LOC653878  | 0.9238 | 1.0596 | 1.0539 | 0.9596 | 0.9992 | 0.0340 |
| ZNF766     | 0.9686 | 1.3744 | 0.9370 | 0.7168 | 0.9992 | 0.1370 |
| MBOAT1     | 0.8909 | 1.1042 | 1.0689 | 0.9329 | 0.9992 | 0.0516 |
| SLC17A1    | 1.0626 | 0.9954 | 1.0633 | 0.8757 | 0.9992 | 0.0442 |
| HECW1      | 0.9050 | 1.2331 | 0.9575 | 0.9013 | 0.9992 | 0.0790 |
| LOC728804  | 0.9726 | 1.1147 | 0.9871 | 0.9225 | 0.9992 | 0.0409 |
| MIR1302-8  | 1.0174 | 0.9999 | 1.0078 | 0.9718 | 0.9992 | 0.0098 |
| LOC650210  | 0.8870 | 1.0849 | 1.1240 | 0.9012 | 0.9992 | 0.0613 |
| LOC645444  | 1.0598 | 0.9713 | 0.9503 | 1.0157 | 0.9993 | 0.0244 |
| NDFIP1     | 0.8070 | 1.3493 | 1.0875 | 0.7533 | 0.9993 | 0.1378 |
| LOC643014  | 0.9066 | 1.1199 | 1.0741 | 0.8966 | 0.9993 | 0.0572 |
| C7orf53    | 0.9862 | 1.1053 | 0.9527 | 0.9529 | 0.9993 | 0.0362 |
| BZRPL1     | 1.0067 | 1.1180 | 0.9449 | 0.9275 | 0.9993 | 0.0431 |
| ZKSCAN5    | 0.9498 | 1.1755 | 1.0038 | 0.8681 | 0.9993 | 0.0650 |
| EHD3       | 0.8945 | 1.1929 | 0.9402 | 0.9696 | 0.9993 | 0.0664 |
| ADCY5      | 1.0272 | 1.0245 | 0.9713 | 0.9743 | 0.9993 | 0.0153 |
| KIRREL2    | 0.9592 | 1.1530 | 0.9979 | 0.8871 | 0.9993 | 0.0561 |
| SPANXE     | 0.9404 | 1.0876 | 1.0215 | 0.9478 | 0.9993 | 0.0347 |
| LMAN1L     | 0.9400 | 1.1198 | 1.0650 | 0.8724 | 0.9993 | 0.0566 |
| RPL12      | 0.8564 | 1.2982 | 1.0157 | 0.8270 | 0.9993 | 0.1079 |
| LOC284422  | 0.9932 | 1.1390 | 0.9882 | 0.8769 | 0.9993 | 0.0538 |
| LOC644419  | 0.9350 | 1.1927 | 0.9309 | 0.9387 | 0.9993 | 0.0645 |
| LOC729597  | 0.9585 | 1.1199 | 1.0138 | 0.9052 | 0.9993 | 0.0459 |
| MIR608     | 0.9198 | 1.0306 | 1.1500 | 0.8970 | 0.9993 | 0.0581 |
| GAS2       | 0.9821 | 1.0787 | 1.0241 | 0.9125 | 0.9993 | 0.0351 |
| DOCK8      | 1.0081 | 1.0401 | 1.0263 | 0.9229 | 0.9994 | 0.0263 |
| LOC644764  | 0.9155 | 1.0749 | 1.0765 | 0.9305 | 0.9994 | 0.0442 |
| PRLHR      | 0.9873 | 0.9654 | 1.0397 | 1.0050 | 0.9994 | 0.0157 |
| RPS4Y2     | 0.9244 | 1.2515 | 1.1000 | 0.7216 | 0.9994 | 0.1142 |
| LOC643381  | 0.9736 | 1.0293 | 0.9667 | 1.0279 | 0.9994 | 0.0169 |
| ZNF780A    | 0.8854 | 1.1803 | 1.0387 | 0.8931 | 0.9994 | 0.0699 |
| TNFRSF17   | 0.9951 | 1.0030 | 1.0558 | 0.9436 | 0.9994 | 0.0230 |

|            |        |        |        |        |        |        |
|------------|--------|--------|--------|--------|--------|--------|
| LOC441167  | 1.0340 | 1.0701 | 0.9773 | 0.9162 | 0.9994 | 0.0337 |
| LOC645362  | 1.0011 | 1.1664 | 0.9584 | 0.8717 | 0.9994 | 0.0618 |
| LOC255480  | 0.8827 | 1.0074 | 1.1215 | 0.9859 | 0.9994 | 0.0490 |
| GPR64      | 0.9109 | 1.0911 | 1.0395 | 0.9560 | 0.9994 | 0.0406 |
| LOC1001302 | 0.9204 | 1.1154 | 1.0758 | 0.8859 | 0.9994 | 0.0566 |
| LOC642268  | 1.0356 | 1.0837 | 1.0235 | 0.8548 | 0.9994 | 0.0499 |
| ZNF117     | 0.9509 | 1.0593 | 1.0796 | 0.9078 | 0.9994 | 0.0416 |
| OR5AU1     | 1.0181 | 0.9679 | 1.0231 | 0.9886 | 0.9994 | 0.0130 |
| LOC130678  | 0.9210 | 1.1443 | 0.9781 | 0.9543 | 0.9994 | 0.0497 |
| TAC4       | 1.0582 | 1.0724 | 1.0206 | 0.8466 | 0.9994 | 0.0521 |
| LOC729751  | 0.9554 | 1.1669 | 0.9731 | 0.9023 | 0.9994 | 0.0578 |
| ARHGAP27   | 1.0251 | 1.0924 | 0.9716 | 0.9087 | 0.9994 | 0.0391 |
| LOC1001909 | 0.9677 | 1.0860 | 1.0041 | 0.9400 | 0.9995 | 0.0317 |
| SLC7A10    | 0.9183 | 1.1919 | 1.0452 | 0.8424 | 0.9995 | 0.0766 |
| LOC121906  | 0.8819 | 1.1906 | 1.0024 | 0.9229 | 0.9995 | 0.0685 |
| LOC388707  | 0.7566 | 1.4387 | 1.0838 | 0.7189 | 0.9995 | 0.1678 |
| ZNF585A    | 1.0110 | 1.2063 | 0.9758 | 0.8047 | 0.9995 | 0.0824 |
| LOC645151  | 0.8209 | 1.1540 | 1.1374 | 0.8857 | 0.9995 | 0.0855 |
| HTR2C      | 0.9834 | 1.0707 | 1.0242 | 0.9197 | 0.9995 | 0.0320 |
| SEMA4B     | 0.9888 | 1.2695 | 0.8877 | 0.8519 | 0.9995 | 0.0946 |
| RAB3GAP2   | 1.0937 | 1.3445 | 0.8716 | 0.6882 | 0.9995 | 0.1418 |
| ARSA       | 1.0043 | 1.0740 | 1.0325 | 0.8872 | 0.9995 | 0.0401 |
| SNORD45A   | 0.8795 | 1.1701 | 0.9957 | 0.9528 | 0.9995 | 0.0617 |
| LOC389834  | 0.8950 | 1.1351 | 1.0376 | 0.9304 | 0.9995 | 0.0544 |
| ZNF546     | 0.8506 | 1.0775 | 1.1325 | 0.9375 | 0.9995 | 0.0644 |
| FLYWCH1    | 0.8720 | 1.2216 | 1.0268 | 0.8777 | 0.9995 | 0.0822 |
| C9orf93    | 1.0205 | 1.0791 | 1.0004 | 0.8980 | 0.9995 | 0.0377 |
| CALM1      | 0.8360 | 1.3518 | 1.0375 | 0.7728 | 0.9995 | 0.1303 |
| LOC644704  | 0.9273 | 1.0760 | 1.0398 | 0.9550 | 0.9995 | 0.0350 |
| LOC729933  | 0.8906 | 1.1779 | 0.9787 | 0.9510 | 0.9995 | 0.0622 |
| LOC642113  | 0.9534 | 1.0385 | 1.1128 | 0.8935 | 0.9995 | 0.0481 |
| LOC727895  | 0.8880 | 1.1762 | 1.0313 | 0.9026 | 0.9996 | 0.0671 |
| NPSR1      | 0.9137 | 1.1372 | 0.9987 | 0.9486 | 0.9996 | 0.0491 |
| LOC642420  | 0.9758 | 1.0829 | 0.9611 | 0.9783 | 0.9996 | 0.0281 |
| LOC1001322 | 1.0482 | 1.0093 | 1.0433 | 0.8974 | 0.9996 | 0.0351 |
| SMPX       | 1.0384 | 1.0424 | 1.0500 | 0.8675 | 0.9996 | 0.0441 |
| C22orf15   | 0.9317 | 1.1394 | 1.0136 | 0.9136 | 0.9996 | 0.0514 |
| ZNF214     | 0.9393 | 1.1144 | 1.0499 | 0.8948 | 0.9996 | 0.0503 |
| CTDSPL     | 0.8601 | 1.3697 | 1.0437 | 0.7248 | 0.9996 | 0.1396 |
| FGB        | 0.9859 | 1.1806 | 0.9716 | 0.8601 | 0.9996 | 0.0666 |
| HEXDC      | 0.9039 | 1.2664 | 1.0548 | 0.7733 | 0.9996 | 0.1059 |
| LOC650677  | 0.9671 | 1.0765 | 1.0415 | 0.9133 | 0.9996 | 0.0367 |
| MGC15885   | 0.8983 | 1.0160 | 1.1540 | 0.9302 | 0.9996 | 0.0571 |
| SPATA9     | 0.9299 | 1.1033 | 1.0598 | 0.9054 | 0.9996 | 0.0484 |
| AKAP5      | 1.0583 | 0.9914 | 1.0708 | 0.8780 | 0.9996 | 0.0441 |
| HMGA2      | 0.9730 | 1.1477 | 1.0024 | 0.8754 | 0.9996 | 0.0563 |

|            |        |        |        |        |        |        |
|------------|--------|--------|--------|--------|--------|--------|
| NPB        | 0.9264 | 1.1252 | 1.1166 | 0.8302 | 0.9996 | 0.0727 |
| MICB       | 0.9901 | 1.1212 | 0.9675 | 0.9196 | 0.9996 | 0.0431 |
| MIR302B    | 1.0060 | 1.0116 | 1.0657 | 0.9151 | 0.9996 | 0.0312 |
| LOC1001312 | 0.8603 | 1.2449 | 0.9298 | 0.9635 | 0.9996 | 0.0845 |
| LOC730105  | 1.0676 | 1.0143 | 0.9671 | 0.9495 | 0.9996 | 0.0265 |
| MGC40574   | 1.0101 | 0.9404 | 1.1030 | 0.9450 | 0.9996 | 0.0379 |
| STX2       | 0.9014 | 1.2945 | 1.0079 | 0.7946 | 0.9996 | 0.1075 |
| ZC3H11A    | 1.0659 | 1.0902 | 0.9582 | 0.8842 | 0.9996 | 0.0480 |
| GJC3       | 0.8903 | 1.1744 | 1.0615 | 0.8723 | 0.9996 | 0.0722 |
| LOC441711  | 0.8851 | 1.1565 | 1.0973 | 0.8597 | 0.9996 | 0.0747 |
| LOC441876  | 0.9687 | 1.0653 | 0.9822 | 0.9824 | 0.9996 | 0.0221 |
| LOC152667  | 0.9403 | 1.0903 | 1.0141 | 0.9539 | 0.9997 | 0.0342 |
| CST6       | 0.9699 | 1.1046 | 0.9573 | 0.9669 | 0.9997 | 0.0351 |
| TIAM2      | 0.9533 | 1.0999 | 1.0480 | 0.8975 | 0.9997 | 0.0456 |
| LOC152225  | 0.9177 | 0.9488 | 1.1008 | 1.0314 | 0.9997 | 0.0414 |
| GHRLOS     | 0.8671 | 1.0549 | 1.0903 | 0.9864 | 0.9997 | 0.0492 |
| GPR6       | 0.9190 | 1.1446 | 1.0321 | 0.9030 | 0.9997 | 0.0562 |
| LOC651728  | 0.9557 | 1.0017 | 1.1411 | 0.9002 | 0.9997 | 0.0515 |
| LOC1001298 | 0.9429 | 1.1221 | 0.9711 | 0.9626 | 0.9997 | 0.0412 |
| TFF2       | 0.9530 | 1.0371 | 1.1215 | 0.8870 | 0.9997 | 0.0509 |
| IL5        | 0.9782 | 1.1336 | 1.0412 | 0.8458 | 0.9997 | 0.0604 |
| CHX10      | 1.1090 | 0.9866 | 0.9305 | 0.9728 | 0.9997 | 0.0383 |
| LYPD3      | 0.9690 | 1.2298 | 0.9746 | 0.8254 | 0.9997 | 0.0841 |
| ZBTB46     | 0.9961 | 1.2221 | 1.0131 | 0.7676 | 0.9997 | 0.0929 |
| LOC645689  | 1.0233 | 1.0707 | 1.0498 | 0.8551 | 0.9997 | 0.0492 |
| FAM43B     | 0.9252 | 1.0776 | 1.0731 | 0.9230 | 0.9997 | 0.0437 |
| LOC652838  | 0.9608 | 1.0900 | 1.0530 | 0.8951 | 0.9997 | 0.0442 |
| LOC728816  | 0.9242 | 1.1460 | 1.0825 | 0.8462 | 0.9997 | 0.0692 |
| XYLT1      | 0.9764 | 1.0536 | 1.0441 | 0.9249 | 0.9997 | 0.0303 |
| LOC652427  | 0.9771 | 0.9102 | 1.1915 | 0.9201 | 0.9997 | 0.0656 |
| ZNF266     | 1.0036 | 1.2083 | 1.0344 | 0.7527 | 0.9997 | 0.0939 |
| PTENP1     | 0.8576 | 1.2958 | 0.8796 | 0.9660 | 0.9998 | 0.1014 |
| LOC643409  | 0.9779 | 1.0018 | 1.1766 | 0.8428 | 0.9998 | 0.0685 |
| LOC1001283 | 0.9081 | 1.0992 | 0.9811 | 1.0106 | 0.9998 | 0.0395 |
| LOC1001287 | 0.9087 | 1.2149 | 1.0553 | 0.8203 | 0.9998 | 0.0865 |
| LOC392196  | 0.9495 | 1.1634 | 1.0228 | 0.8633 | 0.9998 | 0.0635 |
| ICAM5      | 0.9931 | 1.0018 | 1.0664 | 0.9378 | 0.9998 | 0.0263 |
| MIR185     | 0.9031 | 0.9970 | 1.0023 | 1.0967 | 0.9998 | 0.0395 |
| LOC387939  | 0.8932 | 1.1034 | 0.9943 | 1.0082 | 0.9998 | 0.0430 |
| OR4F5      | 0.9803 | 1.0304 | 1.0067 | 0.9817 | 0.9998 | 0.0119 |
| C15orf59   | 0.9389 | 1.0914 | 1.0572 | 0.9117 | 0.9998 | 0.0439 |
| FAM74A4    | 1.0751 | 1.0419 | 0.9789 | 0.9033 | 0.9998 | 0.0378 |
| LOC645655  | 0.9833 | 1.1249 | 0.9580 | 0.9331 | 0.9998 | 0.0429 |
| LOC729461  | 0.8742 | 1.1244 | 1.0905 | 0.9103 | 0.9998 | 0.0629 |
| TTY16      | 1.0284 | 0.9917 | 1.1029 | 0.8763 | 0.9998 | 0.0472 |
| LOC1001333 | 0.9752 | 1.1253 | 1.0150 | 0.8838 | 0.9998 | 0.0500 |

|            |        |        |        |        |        |        |
|------------|--------|--------|--------|--------|--------|--------|
| LOC645897  | 0.9150 | 1.0812 | 1.0285 | 0.9746 | 0.9998 | 0.0357 |
| LOC1001330 | 0.9968 | 1.0489 | 1.0036 | 0.9500 | 0.9998 | 0.0202 |
| OR4F15     | 0.8996 | 1.0911 | 1.1240 | 0.8846 | 0.9998 | 0.0626 |
| RNASE11    | 0.9514 | 1.0356 | 0.9638 | 1.0485 | 0.9998 | 0.0246 |
| CPNE8      | 0.9680 | 1.1181 | 1.0351 | 0.8782 | 0.9999 | 0.0509 |
| TECTB      | 1.0349 | 1.0448 | 1.0406 | 0.8792 | 0.9999 | 0.0403 |
| EBF4       | 0.9522 | 1.0757 | 1.0652 | 0.9065 | 0.9999 | 0.0418 |
| LOC653200  | 1.0240 | 1.0268 | 1.0833 | 0.8653 | 0.9999 | 0.0469 |
| PTCHD1     | 0.8681 | 1.1026 | 1.1285 | 0.9003 | 0.9999 | 0.0673 |
| HPS4       | 0.9152 | 1.1380 | 1.0538 | 0.8926 | 0.9999 | 0.0582 |
| WDR47      | 0.9213 | 1.2509 | 0.9408 | 0.8867 | 0.9999 | 0.0844 |
| PIK3C2G    | 0.9296 | 1.2406 | 0.9734 | 0.8559 | 0.9999 | 0.0838 |
| C13orf29   | 1.0358 | 1.0347 | 1.0429 | 0.8862 | 0.9999 | 0.0379 |
| LOC643382  | 0.9392 | 1.0348 | 1.1278 | 0.8979 | 0.9999 | 0.0514 |
| ACER2      | 0.8593 | 1.2820 | 1.0418 | 0.8165 | 0.9999 | 0.1060 |
| ARHGAP10   | 0.9697 | 1.3317 | 0.9624 | 0.7359 | 0.9999 | 0.1232 |
| C1orf53    | 0.8210 | 1.4317 | 1.0407 | 0.7064 | 0.9999 | 0.1598 |
| LOC643389  | 0.8881 | 1.0714 | 1.0479 | 0.9923 | 0.9999 | 0.0408 |
| FMO2       | 0.9862 | 1.0127 | 1.0503 | 0.9505 | 0.9999 | 0.0211 |
| LOC643466  | 0.8481 | 1.3004 | 0.9717 | 0.8796 | 0.9999 | 0.1035 |
| TMEM170B   | 0.9695 | 1.1961 | 1.0022 | 0.8320 | 0.9999 | 0.0751 |
| LOC644327  | 1.0752 | 0.9698 | 1.0503 | 0.9045 | 0.9999 | 0.0390 |
| LOC1001294 | 1.1078 | 1.0396 | 0.9681 | 0.8842 | 0.9999 | 0.0480 |
| AMACR      | 0.9060 | 1.4504 | 0.9007 | 0.7426 | 0.9999 | 0.1549 |
| PCDH19     | 0.9241 | 1.1040 | 1.0899 | 0.8817 | 1.0000 | 0.0568 |
| LOC1001322 | 0.9300 | 1.1558 | 0.9480 | 0.9661 | 1.0000 | 0.0525 |
| LOC440550  | 0.9542 | 1.0864 | 1.0149 | 0.9444 | 1.0000 | 0.0327 |
| CRABP2     | 1.0213 | 1.0644 | 1.0973 | 0.8170 | 1.0000 | 0.0630 |
| SKCG-1     | 0.9617 | 1.0294 | 1.0775 | 0.9313 | 1.0000 | 0.0330 |
| LOC1001291 | 0.9119 | 1.0811 | 1.1124 | 0.8945 | 1.0000 | 0.0563 |
| PABPC4L    | 1.0057 | 1.0557 | 0.9961 | 0.9423 | 1.0000 | 0.0232 |
| BPTF       | 1.0145 | 1.0712 | 0.9742 | 0.9400 | 1.0000 | 0.0282 |
| MIR371     | 0.9205 | 1.2245 | 0.9374 | 0.9175 | 1.0000 | 0.0750 |
| PURA       | 0.9914 | 1.1130 | 1.1623 | 0.7333 | 1.0000 | 0.0959 |
| DHRS9      | 0.9615 | 1.0963 | 1.0219 | 0.9204 | 1.0000 | 0.0383 |
| TCEB2      | 0.8941 | 1.3724 | 1.0445 | 0.6890 | 1.0000 | 0.1439 |
| PSG7       | 0.8892 | 1.1039 | 1.0805 | 0.9265 | 1.0000 | 0.0540 |
| LOC1001281 | 1.0401 | 1.0349 | 0.9731 | 0.9520 | 1.0000 | 0.0221 |
| ITLN1      | 0.9339 | 1.0606 | 1.1068 | 0.8988 | 1.0000 | 0.0497 |
| LOC652030  | 0.9488 | 1.0602 | 1.0406 | 0.9506 | 1.0000 | 0.0294 |
| LOC643721  | 0.8069 | 1.1140 | 1.0378 | 1.0414 | 1.0000 | 0.0667 |
| SIGLEC14   | 1.0413 | 1.0132 | 1.0251 | 0.9205 | 1.0000 | 0.0271 |
| LOC645693  | 0.9968 | 1.1132 | 1.1521 | 0.7380 | 1.0000 | 0.0934 |
| NGFR       | 1.0060 | 1.0261 | 1.0666 | 0.9015 | 1.0000 | 0.0352 |
| MIR153-2   | 1.0565 | 1.0356 | 0.9800 | 0.9280 | 1.0000 | 0.0289 |
| PRAMEF1    | 0.8864 | 1.1045 | 1.0321 | 0.9772 | 1.0000 | 0.0460 |

|            |        |        |        |        |        |        |
|------------|--------|--------|--------|--------|--------|--------|
| LOC284801  | 1.0456 | 1.0107 | 0.9876 | 0.9563 | 1.0000 | 0.0188 |
| LOC1001310 | 0.9258 | 1.1598 | 0.9947 | 0.9199 | 1.0001 | 0.0559 |
| LOC646568  | 0.9145 | 1.0431 | 1.0580 | 0.9846 | 1.0001 | 0.0326 |
| C9orf70    | 0.9882 | 1.1097 | 1.0206 | 0.8817 | 1.0001 | 0.0471 |
| CRYBA4     | 1.0269 | 1.0705 | 0.9834 | 0.9194 | 1.0001 | 0.0322 |
| HOXA4      | 0.9775 | 1.0888 | 1.0150 | 0.9190 | 1.0001 | 0.0356 |
| RNF213     | 0.9563 | 1.1034 | 0.9777 | 0.9629 | 1.0001 | 0.0347 |
| NECAB2     | 1.0150 | 1.1028 | 1.0008 | 0.8817 | 1.0001 | 0.0455 |
| ATP5J2     | 0.8880 | 1.4575 | 0.9832 | 0.6717 | 1.0001 | 0.1658 |
| LOC1001329 | 0.9623 | 1.0575 | 1.0335 | 0.9470 | 1.0001 | 0.0269 |
| LOC648293  | 0.9501 | 1.0710 | 0.9979 | 0.9813 | 1.0001 | 0.0256 |
| KIAA1906   | 0.9666 | 1.1237 | 1.0996 | 0.8104 | 1.0001 | 0.0720 |
| CXorf23    | 0.9205 | 1.0819 | 1.0806 | 0.9174 | 1.0001 | 0.0469 |
| TBC1D25    | 0.9679 | 1.1000 | 1.0366 | 0.8958 | 1.0001 | 0.0440 |
| SPG7       | 0.9805 | 1.2888 | 0.9417 | 0.7894 | 1.0001 | 0.1047 |
| LOC643496  | 0.9228 | 1.1477 | 1.0397 | 0.8902 | 1.0001 | 0.0588 |
| MIR101-2   | 1.0499 | 1.0244 | 1.0463 | 0.8799 | 1.0001 | 0.0405 |
| PDXP       | 0.7851 | 1.3560 | 1.0854 | 0.7739 | 1.0001 | 0.1388 |
| LOC647551  | 1.1167 | 1.0320 | 1.0011 | 0.8506 | 1.0001 | 0.0555 |
| LOC729346  | 0.8867 | 1.1999 | 1.0140 | 0.8999 | 1.0001 | 0.0725 |
| EP400NL    | 0.9721 | 1.0714 | 1.0401 | 0.9168 | 1.0001 | 0.0346 |
| LOC652255  | 1.0470 | 1.1236 | 0.9280 | 0.9019 | 1.0001 | 0.0519 |
| SNIP1      | 0.8975 | 1.2900 | 1.0435 | 0.7696 | 1.0001 | 0.1116 |
| LOC1001293 | 0.9596 | 1.0408 | 1.0326 | 0.9676 | 1.0001 | 0.0212 |
| LOC651777  | 0.8729 | 1.2275 | 0.9716 | 0.9285 | 1.0001 | 0.0784 |
| LOC1001326 | 0.9652 | 1.0694 | 1.0874 | 0.8786 | 1.0001 | 0.0487 |
| UNQ9438    | 0.9917 | 1.0290 | 1.0757 | 0.9042 | 1.0001 | 0.0363 |
| SLC7A5P1   | 0.9491 | 1.1480 | 1.0096 | 0.8939 | 1.0002 | 0.0546 |
| OR5H14     | 0.8790 | 1.0125 | 1.2006 | 0.9086 | 1.0002 | 0.0727 |
| LOC1001280 | 0.9785 | 1.0683 | 1.0638 | 0.8901 | 1.0002 | 0.0421 |
| IL23R      | 0.9426 | 1.0987 | 1.0357 | 0.9237 | 1.0002 | 0.0410 |
| C20orf200  | 0.9743 | 1.0431 | 1.0669 | 0.9165 | 1.0002 | 0.0341 |
| LOC643831  | 0.9533 | 1.1322 | 1.0636 | 0.8517 | 1.0002 | 0.0617 |
| OR4K14     | 0.9596 | 1.1840 | 0.9938 | 0.8633 | 1.0002 | 0.0672 |
| ERCC-00051 | 0.9296 | 1.1629 | 0.9818 | 0.9264 | 1.0002 | 0.0557 |
| SYDE2      | 1.0742 | 1.1427 | 0.9371 | 0.8467 | 1.0002 | 0.0667 |
| LOC652551  | 1.0296 | 1.0547 | 1.0368 | 0.8797 | 1.0002 | 0.0405 |
| KIAA1045   | 0.8888 | 1.0506 | 1.1067 | 0.9547 | 1.0002 | 0.0486 |
| MTX3       | 0.8410 | 1.3776 | 0.9216 | 0.8605 | 1.0002 | 0.1270 |
| LOC122038  | 0.9052 | 1.1558 | 1.1141 | 0.8257 | 1.0002 | 0.0799 |
| LILRB2     | 0.9666 | 1.0985 | 1.0174 | 0.9183 | 1.0002 | 0.0385 |
| LOC729355  | 0.8696 | 1.3424 | 0.9828 | 0.8061 | 1.0002 | 0.1198 |
| LOC728931  | 1.0031 | 0.9575 | 1.1575 | 0.8828 | 1.0002 | 0.0580 |
| F2RL3      | 1.0255 | 1.0749 | 0.9772 | 0.9234 | 1.0002 | 0.0325 |
| TEKT4      | 0.9700 | 1.0460 | 1.0243 | 0.9606 | 1.0002 | 0.0207 |
| LOC652080  | 0.9431 | 1.0149 | 1.0477 | 0.9952 | 1.0002 | 0.0219 |



|            |        |        |        |        |        |        |
|------------|--------|--------|--------|--------|--------|--------|
| LOC648274  | 1.0023 | 1.0051 | 1.0075 | 0.9860 | 1.0002 | 0.0049 |
| SPDYE1     | 0.9171 | 1.1008 | 1.0267 | 0.9564 | 1.0002 | 0.0405 |
| SLC30A8    | 0.9469 | 0.9942 | 1.1555 | 0.9043 | 1.0002 | 0.0549 |
| TMEM179    | 0.9658 | 1.0454 | 1.0405 | 0.9493 | 1.0002 | 0.0249 |
| LOC727947  | 0.9772 | 1.1134 | 1.0806 | 0.8298 | 1.0003 | 0.0638 |
| SPPL2A     | 0.8469 | 1.2515 | 1.1857 | 0.7169 | 1.0003 | 0.1295 |
| PAR4       | 0.9615 | 1.0863 | 1.0061 | 0.9472 | 1.0003 | 0.0313 |
| LOC649801  | 0.8966 | 1.0257 | 1.2325 | 0.8463 | 1.0003 | 0.0861 |
| KRT1       | 0.9475 | 1.0225 | 1.1021 | 0.9291 | 1.0003 | 0.0395 |
| RPS29      | 0.9401 | 1.2099 | 1.0108 | 0.8403 | 1.0003 | 0.0781 |
| LOC644045  | 0.9555 | 1.1623 | 0.9827 | 0.9007 | 1.0003 | 0.0566 |
| KRTAP5-3   | 0.9691 | 1.0750 | 1.0341 | 0.9230 | 1.0003 | 0.0338 |
| LOC157627  | 1.0115 | 1.0997 | 0.9940 | 0.8960 | 1.0003 | 0.0417 |
| TBC1D14    | 0.9366 | 1.3741 | 0.9405 | 0.7500 | 1.0003 | 0.1323 |
| GLIPR1     | 0.9216 | 1.1104 | 1.0291 | 0.9402 | 1.0003 | 0.0435 |
| ARMCX1     | 0.9425 | 1.0711 | 1.0451 | 0.9426 | 1.0003 | 0.0338 |
| GPR103     | 0.9412 | 1.0297 | 1.0854 | 0.9450 | 1.0003 | 0.0349 |
| LOC1001313 | 1.0048 | 1.0753 | 0.9957 | 0.9255 | 1.0003 | 0.0306 |
| C21orf94   | 0.9246 | 1.1091 | 1.0462 | 0.9215 | 1.0003 | 0.0465 |
| LOC651465  | 1.0015 | 1.0786 | 0.9650 | 0.9562 | 1.0003 | 0.0279 |
| KIAA1553   | 0.9745 | 1.1075 | 1.0249 | 0.8944 | 1.0003 | 0.0447 |
| NBN        | 0.9455 | 1.2449 | 1.0063 | 0.8046 | 1.0003 | 0.0918 |
| HAPLN4     | 0.9555 | 1.1337 | 1.0378 | 0.8744 | 1.0003 | 0.0556 |
| LOC646057  | 0.9260 | 1.1163 | 1.0801 | 0.8790 | 1.0003 | 0.0578 |
| DUB4       | 0.9656 | 1.0626 | 1.0545 | 0.9187 | 1.0004 | 0.0350 |
| F13B       | 0.8947 | 1.0726 | 1.0699 | 0.9641 | 1.0004 | 0.0433 |
| WASPIP     | 0.9376 | 1.0840 | 1.0772 | 0.9026 | 1.0004 | 0.0469 |
| ZFYVE28    | 0.9453 | 1.1488 | 0.9837 | 0.9237 | 1.0004 | 0.0510 |
| LPA        | 0.9293 | 1.0730 | 1.0542 | 0.9450 | 1.0004 | 0.0369 |
| PYCARD     | 0.9203 | 1.0870 | 1.0924 | 0.9017 | 1.0004 | 0.0517 |
| GABRQ      | 0.9386 | 1.0890 | 1.1238 | 0.8501 | 1.0004 | 0.0642 |
| RNU5D      | 0.9285 | 1.0500 | 1.0720 | 0.9510 | 1.0004 | 0.0356 |
| LOC393076  | 0.9136 | 1.0454 | 0.9836 | 1.0590 | 1.0004 | 0.0332 |
| LOC1001340 | 1.0585 | 1.0942 | 0.9044 | 0.9444 | 1.0004 | 0.0452 |
| LOC644592  | 1.0471 | 1.0526 | 0.9125 | 0.9894 | 1.0004 | 0.0326 |
| LOC644303  | 0.9555 | 0.9930 | 1.1023 | 0.9508 | 1.0004 | 0.0353 |
| CDC42BPA   | 0.9352 | 1.3122 | 1.0049 | 0.7493 | 1.0004 | 0.1171 |
| LOC729758  | 1.0021 | 1.0848 | 0.9260 | 0.9888 | 1.0004 | 0.0327 |
| RPS5       | 0.9353 | 1.1101 | 1.0633 | 0.8929 | 1.0004 | 0.0515 |
| NCRNA00155 | 0.9993 | 1.0578 | 1.0225 | 0.9221 | 1.0004 | 0.0287 |
| SLC8A1     | 0.9100 | 1.1039 | 1.0073 | 0.9805 | 1.0004 | 0.0401 |
| CST8       | 0.9477 | 1.0766 | 1.0578 | 0.9196 | 1.0004 | 0.0392 |
| ATOH7      | 0.9560 | 1.1081 | 1.0173 | 0.9202 | 1.0004 | 0.0411 |
| LOC441177  | 0.9756 | 0.9526 | 1.1944 | 0.8791 | 1.0004 | 0.0679 |
| C9orf68    | 0.9135 | 1.1195 | 1.0580 | 0.9108 | 1.0004 | 0.0525 |
| TNFRSF13C  | 0.9983 | 1.0568 | 0.9750 | 0.9716 | 1.0004 | 0.0197 |

|            |        |        |        |        |        |        |
|------------|--------|--------|--------|--------|--------|--------|
| LOC728690  | 0.9943 | 1.0894 | 0.9956 | 0.9225 | 1.0004 | 0.0342 |
| LOC650621  | 0.8782 | 1.2485 | 0.9067 | 0.9683 | 1.0004 | 0.0848 |
| LOC652526  | 0.8327 | 1.2178 | 1.0842 | 0.8670 | 1.0004 | 0.0914 |
| PRAMEF9    | 0.8938 | 1.1606 | 1.1242 | 0.8232 | 1.0004 | 0.0835 |
| CHST12     | 0.8006 | 1.4887 | 0.8993 | 0.8133 | 1.0004 | 0.1642 |
| LOC400236  | 0.9040 | 1.1605 | 1.1633 | 0.7740 | 1.0005 | 0.0969 |
| LOC1001342 | 1.0010 | 1.1096 | 1.0044 | 0.8868 | 1.0005 | 0.0455 |
| LOC1001329 | 0.9744 | 1.1186 | 1.0954 | 0.8134 | 1.0005 | 0.0699 |
| SNORD47    | 1.0008 | 1.1487 | 0.9858 | 0.8666 | 1.0005 | 0.0578 |
| FLJ44082   | 0.9699 | 0.9769 | 1.1217 | 0.9333 | 1.0005 | 0.0415 |
| LOC644157  | 1.0445 | 0.9844 | 0.9927 | 0.9803 | 1.0005 | 0.0149 |
| SNX30      | 1.0169 | 1.2868 | 1.0030 | 0.6951 | 1.0005 | 0.1209 |
| HIGD1A     | 0.8350 | 1.3984 | 1.0964 | 0.6721 | 1.0005 | 0.1588 |
| GRK1       | 0.9032 | 1.1026 | 0.9917 | 1.0044 | 1.0005 | 0.0408 |
| NFATC1     | 0.9900 | 1.0859 | 1.0242 | 0.9019 | 1.0005 | 0.0384 |
| C10orf18   | 1.0012 | 1.1380 | 0.9354 | 0.9274 | 1.0005 | 0.0487 |
| LOC1001339 | 1.0051 | 1.0827 | 1.0213 | 0.8929 | 1.0005 | 0.0396 |
| LOC1001300 | 0.9153 | 1.0632 | 1.2087 | 0.8147 | 1.0005 | 0.0861 |
| SNORA75    | 0.9341 | 1.0330 | 1.1552 | 0.8796 | 1.0005 | 0.0606 |
| C6orf191   | 0.8759 | 1.0941 | 1.1079 | 0.9241 | 1.0005 | 0.0589 |
| LOC642439  | 0.8979 | 1.0770 | 1.0643 | 0.9629 | 1.0005 | 0.0427 |
| MS4A12     | 0.9521 | 1.0423 | 1.0220 | 0.9856 | 1.0005 | 0.0199 |
| FSBP       | 0.9916 | 1.0315 | 1.0728 | 0.9061 | 1.0005 | 0.0356 |
| TRIM6      | 0.9781 | 1.0824 | 0.9387 | 1.0028 | 1.0005 | 0.0303 |
| TAAR8      | 0.8881 | 1.1164 | 1.1304 | 0.8671 | 1.0005 | 0.0711 |
| KRTAP19-6  | 0.8758 | 1.1027 | 1.0795 | 0.9440 | 1.0005 | 0.0543 |
| LOC441081  | 0.9811 | 1.0698 | 1.0453 | 0.9059 | 1.0005 | 0.0367 |
| ZNF321     | 0.9472 | 1.0771 | 1.0355 | 0.9422 | 1.0005 | 0.0333 |
| LOC642433  | 0.9950 | 0.9420 | 1.1008 | 0.9643 | 1.0005 | 0.0351 |
| ABI3BP     | 0.9089 | 1.0337 | 1.0103 | 1.0491 | 1.0005 | 0.0316 |
| LOC652629  | 0.9452 | 1.0712 | 1.0665 | 0.9192 | 1.0005 | 0.0398 |
| SNORA16B   | 0.9087 | 1.1356 | 1.0142 | 0.9435 | 1.0005 | 0.0501 |
| LOC1001301 | 0.9756 | 1.0762 | 1.0353 | 0.9151 | 1.0005 | 0.0352 |
| PRED57     | 0.9627 | 1.1108 | 1.0035 | 0.9252 | 1.0005 | 0.0401 |
| SMAD5OS    | 0.9238 | 1.2620 | 1.0053 | 0.8111 | 1.0005 | 0.0958 |
| SPANXN1    | 0.9140 | 1.1176 | 1.0485 | 0.9221 | 1.0005 | 0.0497 |
| TTLL13     | 0.9856 | 1.0852 | 1.2046 | 0.7269 | 1.0006 | 0.1016 |
| KRTAP5-10  | 0.9821 | 0.9995 | 1.1675 | 0.8531 | 1.0006 | 0.0645 |
| OR4X1      | 0.9266 | 1.1115 | 1.0138 | 0.9503 | 1.0006 | 0.0413 |
| ARPP-21    | 0.9133 | 1.1670 | 0.9922 | 0.9298 | 1.0006 | 0.0580 |
| LOC1001344 | 1.0746 | 1.0154 | 1.0176 | 0.8947 | 1.0006 | 0.0379 |
| LOC440356  | 0.9161 | 1.2837 | 1.0103 | 0.7922 | 1.0006 | 0.1044 |
| LOC440361  | 0.9646 | 1.1123 | 1.0374 | 0.8880 | 1.0006 | 0.0481 |
| LRRC56     | 0.8791 | 1.2189 | 1.0173 | 0.8870 | 1.0006 | 0.0794 |
| RHD        | 0.9638 | 1.0723 | 1.0201 | 0.9461 | 1.0006 | 0.0286 |
| LOC649470  | 0.9636 | 1.1248 | 0.9667 | 0.9472 | 1.0006 | 0.0416 |

|            |        |        |        |        |        |        |
|------------|--------|--------|--------|--------|--------|--------|
| LOC1001320 | 0.9761 | 1.1164 | 0.9646 | 0.9452 | 1.0006 | 0.0391 |
| SCN5A      | 0.9835 | 1.0336 | 1.0501 | 0.9352 | 1.0006 | 0.0260 |
| TOPORS     | 0.8802 | 1.2017 | 1.0852 | 0.8354 | 1.0006 | 0.0863 |
| HDAC5      | 0.8828 | 1.1425 | 1.0584 | 0.9187 | 1.0006 | 0.0606 |
| ACER1      | 0.9324 | 1.0647 | 1.0682 | 0.9372 | 1.0006 | 0.0380 |
| PTGIS      | 0.9199 | 1.0653 | 1.0317 | 0.9855 | 1.0006 | 0.0315 |
| BOAT       | 0.9443 | 1.1657 | 1.0097 | 0.8828 | 1.0006 | 0.0608 |
| DZIP1L     | 0.8644 | 1.1947 | 1.0017 | 0.9419 | 1.0006 | 0.0705 |
| CALM3      | 0.8758 | 1.4908 | 0.9392 | 0.6968 | 1.0006 | 0.1713 |
| SLC6A3     | 1.0327 | 1.0608 | 1.0089 | 0.9001 | 1.0006 | 0.0351 |
| ZNF493     | 0.9261 | 1.1247 | 1.0317 | 0.9202 | 1.0007 | 0.0486 |
| FAM154A    | 0.9941 | 1.0825 | 1.0376 | 0.8884 | 1.0007 | 0.0415 |
| ABCA10     | 0.9225 | 1.1807 | 1.0400 | 0.8596 | 1.0007 | 0.0707 |
| OR4A15     | 0.9463 | 1.0091 | 1.0522 | 0.9951 | 1.0007 | 0.0218 |
| NKTR       | 0.9988 | 1.3584 | 0.8908 | 0.7547 | 1.0007 | 0.1293 |
| FAM13C1    | 0.9768 | 1.0857 | 1.0114 | 0.9288 | 1.0007 | 0.0330 |
| LOC654109  | 0.9412 | 1.1357 | 0.9842 | 0.9416 | 1.0007 | 0.0461 |
| LOC728955  | 0.8906 | 1.1395 | 0.9992 | 0.9734 | 1.0007 | 0.0517 |
| PHACS      | 0.9605 | 1.0466 | 1.0442 | 0.9515 | 1.0007 | 0.0259 |
| ST8SIA1    | 0.9799 | 1.0657 | 1.0473 | 0.9100 | 1.0007 | 0.0354 |
| LOC728440  | 0.9645 | 1.1358 | 0.8942 | 1.0083 | 1.0007 | 0.0508 |
| FLJ10246   | 0.9425 | 1.0649 | 1.0958 | 0.8995 | 1.0007 | 0.0473 |
| OR2L2      | 1.0015 | 1.0858 | 0.9700 | 0.9455 | 1.0007 | 0.0306 |
| TGDS       | 0.7778 | 1.4779 | 0.9727 | 0.7744 | 1.0007 | 0.1657 |
| ELF1       | 0.8473 | 1.5180 | 1.0086 | 0.6290 | 1.0007 | 0.1892 |
| LOC645630  | 0.9281 | 1.1483 | 1.1713 | 0.7552 | 1.0007 | 0.0985 |
| LOC649897  | 1.0012 | 1.0951 | 1.0263 | 0.8803 | 1.0007 | 0.0448 |
| ADH1B      | 0.9621 | 1.0879 | 0.9894 | 0.9635 | 1.0007 | 0.0297 |
| MIR345     | 0.9853 | 1.1926 | 0.9943 | 0.8307 | 1.0007 | 0.0742 |
| FAM10A6    | 1.0229 | 0.9916 | 1.1064 | 0.8821 | 1.0007 | 0.0464 |
| LOC401180  | 0.9444 | 1.1403 | 1.0086 | 0.9097 | 1.0007 | 0.0508 |
| UNC13B     | 1.1691 | 1.2993 | 0.9015 | 0.6331 | 1.0007 | 0.1479 |
| OR56B1     | 0.9514 | 1.1263 | 0.9848 | 0.9405 | 1.0008 | 0.0429 |
| LOC728100  | 0.9655 | 1.1196 | 1.0446 | 0.8732 | 1.0008 | 0.0529 |
| C20orf135  | 0.9692 | 0.9831 | 1.0804 | 0.9703 | 1.0008 | 0.0268 |
| ACSL5      | 0.9932 | 1.0783 | 1.0426 | 0.8890 | 1.0008 | 0.0411 |
| HTR4       | 1.0013 | 1.1206 | 0.9550 | 0.9261 | 1.0008 | 0.0428 |
| LOC644256  | 0.9544 | 1.0785 | 0.9878 | 0.9823 | 1.0008 | 0.0269 |
| GLI3       | 0.9729 | 1.0734 | 0.9835 | 0.9734 | 1.0008 | 0.0243 |
| LOC650659  | 0.9602 | 1.1671 | 1.0930 | 0.7829 | 1.0008 | 0.0843 |
| PDE3A      | 0.8792 | 1.2098 | 0.9635 | 0.9507 | 1.0008 | 0.0721 |
| LYG2       | 0.9523 | 1.1267 | 1.0832 | 0.8410 | 1.0008 | 0.0649 |
| MYST4      | 0.8666 | 1.2435 | 1.0103 | 0.8828 | 1.0008 | 0.0870 |
| LOC729193  | 0.9676 | 1.0142 | 1.0478 | 0.9737 | 1.0008 | 0.0188 |
| LOC1001284 | 0.8214 | 1.1684 | 1.0814 | 0.9321 | 1.0008 | 0.0772 |
| DPY19L2P4  | 0.9324 | 1.1285 | 0.9834 | 0.9590 | 1.0008 | 0.0438 |

|            |        |        |        |        |        |        |
|------------|--------|--------|--------|--------|--------|--------|
| SCYE1      | 0.8305 | 1.1067 | 1.1201 | 0.9459 | 1.0008 | 0.0692 |
| TNS4       | 1.0068 | 1.0036 | 1.0568 | 0.9361 | 1.0008 | 0.0248 |
| LOC1001299 | 0.9684 | 1.1877 | 1.0687 | 0.7784 | 1.0008 | 0.0866 |
| LOC1001291 | 0.9322 | 1.1498 | 0.9962 | 0.9252 | 1.0008 | 0.0522 |
| LOC347549  | 0.9261 | 1.1124 | 1.0064 | 0.9585 | 1.0009 | 0.0407 |
| LOC1001314 | 0.9394 | 1.0486 | 1.1076 | 0.9078 | 1.0009 | 0.0466 |
| CEP170L    | 0.9703 | 1.0769 | 1.0420 | 0.9142 | 1.0009 | 0.0364 |
| MGC3032    | 0.8677 | 1.0927 | 1.1747 | 0.8683 | 1.0009 | 0.0785 |
| RBM44      | 0.8798 | 1.1198 | 1.0511 | 0.9527 | 1.0009 | 0.0529 |
| TKTL2      | 1.0116 | 1.0836 | 1.0030 | 0.9053 | 1.0009 | 0.0366 |
| LOC644464  | 0.9168 | 1.1637 | 1.0751 | 0.8479 | 1.0009 | 0.0722 |
| OR2B11     | 0.9517 | 1.1754 | 1.0368 | 0.8395 | 1.0009 | 0.0708 |
| SYK        | 0.9858 | 1.0880 | 1.0172 | 0.9124 | 1.0009 | 0.0364 |
| LOC649770  | 0.8759 | 1.1440 | 1.0967 | 0.8869 | 1.0009 | 0.0697 |
| LOC1001337 | 0.8286 | 1.1986 | 1.0331 | 0.9432 | 1.0009 | 0.0781 |
| ZNF750     | 0.9122 | 1.0160 | 1.0368 | 1.0385 | 1.0009 | 0.0300 |
| LOC644431  | 0.9226 | 1.0556 | 1.0337 | 0.9917 | 1.0009 | 0.0293 |
| C14orf78   | 0.9201 | 1.1430 | 0.9640 | 0.9764 | 1.0009 | 0.0489 |
| ABCG8      | 0.9914 | 1.1327 | 0.9413 | 0.9380 | 1.0009 | 0.0456 |
| MIR1295    | 0.8051 | 1.1997 | 1.0111 | 0.9877 | 1.0009 | 0.0807 |
| GOLGA8F    | 0.9703 | 1.1724 | 0.9680 | 0.8930 | 1.0009 | 0.0599 |
| LIMS2      | 0.9389 | 1.0708 | 0.9567 | 1.0373 | 1.0009 | 0.0316 |
| LCE6A      | 0.9929 | 1.0757 | 1.0312 | 0.9038 | 1.0009 | 0.0365 |
| LOC730474  | 0.9041 | 1.1177 | 0.9659 | 1.0161 | 1.0009 | 0.0452 |
| KCNH1      | 0.9183 | 1.0792 | 1.1160 | 0.8902 | 1.0009 | 0.0566 |
| NLRP14     | 1.0011 | 1.0771 | 1.0617 | 0.8639 | 1.0009 | 0.0485 |
| FAM133A    | 0.9855 | 1.0817 | 1.0093 | 0.9272 | 1.0009 | 0.0320 |
| LOC1001331 | 0.9503 | 1.0646 | 1.0557 | 0.9333 | 1.0010 | 0.0344 |
| LOC728744  | 0.9768 | 1.2092 | 0.9691 | 0.8488 | 1.0010 | 0.0754 |
| CBX4       | 0.9760 | 1.4257 | 0.9454 | 0.6568 | 1.0010 | 0.1588 |
| LOC146517  | 0.9128 | 1.3234 | 0.9778 | 0.7900 | 1.0010 | 0.1143 |
| RGS16      | 1.0267 | 1.0539 | 0.9777 | 0.9456 | 1.0010 | 0.0243 |
| PLD2       | 0.9097 | 1.1090 | 0.9897 | 0.9955 | 1.0010 | 0.0410 |
| HCG9       | 1.0056 | 1.0074 | 1.0973 | 0.8936 | 1.0010 | 0.0417 |
| LOC653314  | 0.8238 | 1.2384 | 1.1292 | 0.8125 | 1.0010 | 0.1079 |
| MIR376B    | 0.9657 | 1.0727 | 1.0197 | 0.9459 | 1.0010 | 0.0285 |
| FBXO31     | 0.8345 | 1.3399 | 1.0064 | 0.8231 | 1.0010 | 0.1205 |
| ZNF765     | 0.8959 | 1.1942 | 1.0103 | 0.9035 | 1.0010 | 0.0695 |
| LOC1001280 | 0.9254 | 1.0918 | 1.1366 | 0.8501 | 1.0010 | 0.0678 |
| ALX3       | 0.9445 | 1.0991 | 1.0303 | 0.9301 | 1.0010 | 0.0395 |
| ROR2       | 0.9915 | 1.0154 | 1.0950 | 0.9022 | 1.0010 | 0.0397 |
| LOC643433  | 0.8655 | 1.2755 | 1.1511 | 0.7120 | 1.0010 | 0.1290 |
| ADAMTS5    | 0.9443 | 1.0264 | 1.0762 | 0.9571 | 1.0010 | 0.0309 |
| SRCRB4D    | 0.9148 | 1.1623 | 1.0936 | 0.8334 | 1.0010 | 0.0764 |
| ZNF311     | 0.9148 | 1.1278 | 1.0058 | 0.9557 | 1.0010 | 0.0462 |
| MIR720     | 0.9131 | 1.1105 | 1.0663 | 0.9142 | 1.0010 | 0.0512 |

|            |        |        |        |        |        |        |
|------------|--------|--------|--------|--------|--------|--------|
| C16orf3    | 1.0010 | 1.0664 | 0.9239 | 1.0128 | 1.0010 | 0.0294 |
| NOX1       | 1.0225 | 1.0617 | 1.0040 | 0.9159 | 1.0010 | 0.0308 |
| KIAA1641   | 0.9427 | 1.1083 | 1.0215 | 0.9317 | 1.0010 | 0.0410 |
| LOC648905  | 0.9124 | 1.0410 | 1.0975 | 0.9533 | 1.0011 | 0.0419 |
| SORT1      | 0.9692 | 1.3894 | 0.8309 | 0.8148 | 1.0011 | 0.1340 |
| LOC648732  | 0.9686 | 1.0704 | 1.1144 | 0.8509 | 1.0011 | 0.0586 |
| LOC651578  | 0.9449 | 1.1570 | 1.0301 | 0.8724 | 1.0011 | 0.0612 |
| TSPAN19    | 1.0546 | 1.0823 | 1.0085 | 0.8591 | 1.0011 | 0.0497 |
| LOC283547  | 1.0039 | 1.0560 | 1.0038 | 0.9408 | 1.0011 | 0.0236 |
| LOC728128  | 0.8878 | 1.0776 | 1.1568 | 0.8822 | 1.0011 | 0.0690 |
| LOC1001283 | 0.9779 | 1.1889 | 0.9841 | 0.8534 | 1.0011 | 0.0695 |
| TNFAIP8L2  | 1.0070 | 1.0116 | 1.0100 | 0.9759 | 1.0011 | 0.0085 |
| FLJ46347   | 1.0396 | 1.0095 | 1.0586 | 0.8968 | 1.0011 | 0.0362 |
| LOC643465  | 0.9323 | 1.0297 | 1.0059 | 1.0365 | 1.0011 | 0.0239 |
| GOLGA6     | 0.9028 | 1.1042 | 1.0606 | 0.9369 | 1.0011 | 0.0483 |
| LOC1001321 | 0.8526 | 1.2165 | 1.1188 | 0.8167 | 1.0011 | 0.0984 |
| CLN8       | 0.8967 | 1.2583 | 0.9797 | 0.8699 | 1.0011 | 0.0888 |
| CCDC38     | 0.9525 | 1.0856 | 1.1029 | 0.8636 | 1.0011 | 0.0568 |
| LOC648879  | 0.9430 | 1.1324 | 0.9902 | 0.9389 | 1.0011 | 0.0453 |
| DEGS1      | 0.9040 | 1.2671 | 1.1572 | 0.6764 | 1.0012 | 0.1323 |
| RPL19      | 0.9174 | 1.0834 | 1.1325 | 0.8713 | 1.0012 | 0.0632 |
| PIK3AP1    | 1.0057 | 1.0710 | 1.0302 | 0.8977 | 1.0012 | 0.0370 |
| LRP12      | 0.9416 | 1.1404 | 1.0448 | 0.8779 | 1.0012 | 0.0578 |
| LOC645978  | 0.9569 | 1.1610 | 0.9973 | 0.8895 | 1.0012 | 0.0577 |
| LOC647279  | 0.9289 | 1.0553 | 1.1769 | 0.8436 | 1.0012 | 0.0730 |
| SCN1A      | 0.9298 | 1.1452 | 0.9794 | 0.9505 | 1.0012 | 0.0491 |
| LOC1001345 | 1.0172 | 1.0624 | 0.9290 | 0.9961 | 1.0012 | 0.0277 |
| LOC644044  | 0.9542 | 1.2459 | 0.9845 | 0.8202 | 1.0012 | 0.0890 |
| CD44       | 0.9573 | 1.1660 | 0.9879 | 0.8935 | 1.0012 | 0.0584 |
| LOC650683  | 0.9141 | 1.0921 | 1.1150 | 0.8837 | 1.0012 | 0.0596 |
| PCDHB14    | 1.0221 | 1.1017 | 1.0109 | 0.8701 | 1.0012 | 0.0481 |
| FKSG44     | 0.9285 | 1.0418 | 1.0878 | 0.9467 | 1.0012 | 0.0381 |
| CSMD1      | 0.9095 | 1.3461 | 0.9916 | 0.7577 | 1.0012 | 0.1248 |
| TTY17C     | 0.9167 | 1.0597 | 1.0536 | 0.9748 | 1.0012 | 0.0342 |
| OR52A4     | 0.9520 | 0.9796 | 1.0231 | 1.0502 | 1.0012 | 0.0219 |
| GGT6       | 1.0265 | 0.9770 | 0.9448 | 1.0566 | 1.0012 | 0.0250 |
| LOC1001340 | 0.8233 | 1.0940 | 1.1625 | 0.9251 | 1.0012 | 0.0775 |
| FAM27L     | 1.1804 | 0.9760 | 0.9613 | 0.8873 | 1.0012 | 0.0628 |
| LOC643665  | 0.9062 | 1.1259 | 0.9619 | 1.0110 | 1.0012 | 0.0467 |
| C18orf62   | 0.9335 | 1.0902 | 1.0380 | 0.9432 | 1.0012 | 0.0379 |
| FAM75A5    | 1.0495 | 1.0454 | 0.9763 | 0.9338 | 1.0013 | 0.0281 |
| SCN3A      | 0.9727 | 1.0986 | 1.0561 | 0.8776 | 1.0013 | 0.0488 |
| FAM12A     | 0.9905 | 1.1152 | 0.9460 | 0.9533 | 1.0013 | 0.0392 |
| UGCG       | 0.7803 | 1.2567 | 1.0363 | 0.9317 | 1.0013 | 0.1001 |
| LOC650040  | 0.8529 | 1.0360 | 1.1695 | 0.9466 | 1.0013 | 0.0674 |
| LOC1001290 | 0.9397 | 1.0323 | 1.0229 | 1.0102 | 1.0013 | 0.0210 |

|            |        |        |        |        |        |        |
|------------|--------|--------|--------|--------|--------|--------|
| LOC652068  | 0.8767 | 1.1939 | 1.1468 | 0.7877 | 1.0013 | 0.0998 |
| RECQL5     | 0.9496 | 1.1023 | 1.0082 | 0.9450 | 1.0013 | 0.0366 |
| ATPBD3     | 0.8509 | 1.3662 | 0.9028 | 0.8853 | 1.0013 | 0.1221 |
| LOC728787  | 0.8957 | 1.2013 | 1.0927 | 0.8155 | 1.0013 | 0.0885 |
| ATOH8      | 0.9483 | 1.0124 | 1.0958 | 0.9487 | 1.0013 | 0.0349 |
| LOC1001295 | 0.9126 | 1.0974 | 1.0933 | 0.9018 | 1.0013 | 0.0544 |
| LOC1001330 | 1.0330 | 0.9949 | 1.1112 | 0.8661 | 1.0013 | 0.0511 |
| LOC729587  | 0.8974 | 1.2505 | 1.0149 | 0.8425 | 1.0013 | 0.0905 |
| C15orf29   | 0.9241 | 1.0729 | 1.0742 | 0.9340 | 1.0013 | 0.0418 |
| LOC646677  | 0.8607 | 1.0573 | 1.1267 | 0.9604 | 1.0013 | 0.0580 |
| LOC197135  | 0.9683 | 1.1529 | 1.0601 | 0.8240 | 1.0013 | 0.0701 |
| LOC648553  | 1.0121 | 1.0774 | 0.9860 | 0.9298 | 1.0013 | 0.0306 |
| LRRC18     | 0.9393 | 1.0797 | 1.0952 | 0.8911 | 1.0013 | 0.0508 |
| TUBGCP5    | 1.0367 | 1.1764 | 1.0546 | 0.7376 | 1.0013 | 0.0932 |
| LOC651624  | 1.0662 | 1.0380 | 0.9491 | 0.9520 | 1.0013 | 0.0299 |
| ZNF554     | 0.8914 | 1.0462 | 1.1116 | 0.9562 | 1.0013 | 0.0486 |
| EPHB2      | 1.0417 | 1.1615 | 0.9694 | 0.8327 | 1.0013 | 0.0688 |
| SF3B2      | 0.9946 | 1.3441 | 0.8798 | 0.7868 | 1.0013 | 0.1219 |
| FBXO22     | 0.8945 | 1.4499 | 0.8867 | 0.7742 | 1.0013 | 0.1520 |
| LOC1001288 | 0.9001 | 1.2213 | 1.0863 | 0.7977 | 1.0013 | 0.0946 |
| LOC647531  | 0.9525 | 1.0697 | 1.1031 | 0.8801 | 1.0013 | 0.0517 |
| KLK1       | 0.9506 | 1.1431 | 0.9669 | 0.9447 | 1.0013 | 0.0475 |
| CREB1      | 0.8056 | 1.2740 | 1.1197 | 0.8061 | 1.0013 | 0.1172 |
| CDKN2AIPNL | 0.7555 | 1.1533 | 1.3105 | 0.7860 | 1.0014 | 0.1371 |
| PRSS33     | 0.9929 | 1.0623 | 1.0449 | 0.9053 | 1.0014 | 0.0353 |
| LOC644748  | 0.8910 | 1.1307 | 1.0240 | 0.9597 | 1.0014 | 0.0510 |
| GABARAP    | 0.7732 | 1.1620 | 0.9899 | 1.0803 | 1.0014 | 0.0838 |
| LOC730357  | 0.8942 | 1.2251 | 1.0520 | 0.8342 | 1.0014 | 0.0876 |
| LOC1001312 | 1.0145 | 1.0259 | 1.0122 | 0.9528 | 1.0014 | 0.0165 |
| GBP5       | 0.9857 | 1.1007 | 1.0739 | 0.8453 | 1.0014 | 0.0575 |
| MRGPRX1    | 0.9031 | 1.0867 | 1.0449 | 0.9708 | 1.0014 | 0.0406 |
| PARD3B     | 0.9237 | 1.1002 | 0.9950 | 0.9867 | 1.0014 | 0.0366 |
| LOC1001331 | 0.9956 | 1.0290 | 1.0628 | 0.9181 | 1.0014 | 0.0310 |
| LOC1001294 | 1.0255 | 1.0610 | 1.0211 | 0.8980 | 1.0014 | 0.0356 |
| TBC1D3B    | 0.9462 | 1.1261 | 1.0774 | 0.8559 | 1.0014 | 0.0616 |
| C2orf54    | 0.9169 | 1.1697 | 0.9380 | 0.9810 | 1.0014 | 0.0577 |
| SASH3      | 0.9629 | 1.0434 | 0.9606 | 1.0388 | 1.0014 | 0.0229 |
| LOC1001292 | 0.9649 | 1.1061 | 1.0299 | 0.9047 | 1.0014 | 0.0433 |
| LOC644366  | 0.9996 | 1.0313 | 1.1085 | 0.8662 | 1.0014 | 0.0505 |
| BDKRB1     | 0.8933 | 1.1459 | 1.0163 | 0.9502 | 1.0014 | 0.0543 |
| HULC       | 0.9304 | 1.0686 | 0.9848 | 1.0218 | 1.0014 | 0.0292 |
| LOC283104  | 0.9693 | 1.0498 | 1.1183 | 0.8683 | 1.0014 | 0.0538 |
| ATXN7L1    | 0.9547 | 1.1153 | 1.0036 | 0.9322 | 1.0014 | 0.0408 |
| PPIAL4G    | 0.9384 | 1.1314 | 1.0534 | 0.8825 | 1.0014 | 0.0561 |
| PLEC1      | 0.9752 | 1.1041 | 1.0571 | 0.8693 | 1.0014 | 0.0515 |
| LOC1001348 | 0.8284 | 1.1019 | 1.1392 | 0.9363 | 1.0014 | 0.0726 |

|            |        |        |        |        |        |        |
|------------|--------|--------|--------|--------|--------|--------|
| LOC401101  | 1.0016 | 1.1278 | 0.9545 | 0.9219 | 1.0015 | 0.0452 |
| LOC1001328 | 0.9448 | 1.1321 | 1.1623 | 0.7666 | 1.0015 | 0.0919 |
| C17orf100  | 0.9392 | 1.3735 | 0.8918 | 0.8014 | 1.0015 | 0.1273 |
| LOC93463   | 0.8426 | 1.1708 | 1.0637 | 0.9287 | 1.0015 | 0.0725 |
| TSSK3      | 0.9471 | 1.1877 | 0.9541 | 0.9169 | 1.0015 | 0.0626 |
| ZNF804A    | 0.8789 | 1.0935 | 1.1740 | 0.8595 | 1.0015 | 0.0782 |
| C8orf41    | 0.9546 | 1.1256 | 1.0349 | 0.8909 | 1.0015 | 0.0508 |
| LOC440917  | 0.9670 | 1.0890 | 0.9914 | 0.9586 | 1.0015 | 0.0300 |
| LOC339524  | 0.9856 | 1.1546 | 1.0269 | 0.8389 | 1.0015 | 0.0651 |
| LOC644372  | 0.9230 | 1.1321 | 1.0083 | 0.9425 | 1.0015 | 0.0472 |
| TUSC1      | 1.0252 | 1.1061 | 0.9773 | 0.8973 | 1.0015 | 0.0437 |
| LOC344065  | 1.0233 | 1.1676 | 0.9689 | 0.8462 | 1.0015 | 0.0666 |
| PVRIG      | 1.0047 | 1.0726 | 1.0580 | 0.8706 | 1.0015 | 0.0460 |
| CEP110     | 0.9658 | 1.1049 | 0.9538 | 0.9815 | 1.0015 | 0.0349 |
| LOC1001304 | 0.9089 | 1.1999 | 0.9011 | 0.9960 | 1.0015 | 0.0695 |
| TDGF3      | 0.9745 | 1.0763 | 0.9329 | 1.0223 | 1.0015 | 0.0309 |
| LOC203510  | 1.0893 | 1.0741 | 0.9926 | 0.8501 | 1.0015 | 0.0547 |
| LOC650107  | 0.9503 | 1.0524 | 0.9681 | 1.0354 | 1.0015 | 0.0250 |
| GPR174     | 0.8705 | 1.2156 | 0.9781 | 0.9418 | 1.0015 | 0.0748 |
| LOC644604  | 0.9634 | 1.0750 | 1.0581 | 0.9095 | 1.0015 | 0.0393 |
| DEFB105B   | 1.1244 | 1.0388 | 1.0083 | 0.8347 | 1.0015 | 0.0608 |
| LOC1001345 | 0.8538 | 1.1799 | 1.3737 | 0.5988 | 1.0015 | 0.1718 |
| LOC1001286 | 0.9179 | 1.1150 | 1.0548 | 0.9184 | 1.0015 | 0.0497 |
| LOC730272  | 0.9350 | 0.9980 | 1.0182 | 1.0550 | 1.0015 | 0.0251 |
| LOC654335  | 0.9875 | 0.9931 | 1.1137 | 0.9119 | 1.0016 | 0.0417 |
| LOC642571  | 1.0174 | 1.0637 | 1.0220 | 0.9031 | 1.0016 | 0.0344 |
| AKR7A3     | 0.8509 | 1.3177 | 1.0936 | 0.7441 | 1.0016 | 0.1283 |
| 7A5        | 0.9768 | 0.9827 | 1.0519 | 0.9950 | 1.0016 | 0.0172 |
| OR6C74     | 0.8949 | 1.1115 | 1.1393 | 0.8607 | 1.0016 | 0.0720 |
| LOC731052  | 0.9080 | 1.0910 | 1.0489 | 0.9584 | 1.0016 | 0.0417 |
| PCDHB8     | 1.0180 | 1.1362 | 0.9462 | 0.9059 | 1.0016 | 0.0505 |
| LOC653480  | 0.9872 | 1.2036 | 1.0320 | 0.7836 | 1.0016 | 0.0863 |
| LOC644845  | 0.8494 | 1.0502 | 1.0986 | 1.0082 | 1.0016 | 0.0540 |
| PDZD7      | 0.9323 | 1.1241 | 1.0464 | 0.9035 | 1.0016 | 0.0512 |
| FAM134B    | 0.9415 | 1.3149 | 1.0661 | 0.6839 | 1.0016 | 0.1313 |
| HAO1       | 0.9850 | 1.1098 | 1.0001 | 0.9116 | 1.0016 | 0.0409 |
| MIR299     | 0.9646 | 1.1413 | 0.9514 | 0.9492 | 1.0016 | 0.0467 |
| OR8D4      | 0.9811 | 1.0452 | 0.9902 | 0.9900 | 1.0016 | 0.0147 |
| MGC39581   | 1.0501 | 1.0984 | 0.9885 | 0.8694 | 1.0016 | 0.0495 |
| SHROOM4    | 0.7584 | 1.3756 | 1.1027 | 0.7697 | 1.0016 | 0.1481 |
| TUBA8      | 1.1582 | 0.9210 | 1.0114 | 0.9159 | 1.0016 | 0.0566 |
| LOC646631  | 0.9754 | 0.9723 | 1.1468 | 0.9120 | 1.0016 | 0.0505 |
| LOC139363  | 0.8570 | 1.1094 | 1.1406 | 0.8995 | 1.0016 | 0.0721 |
| LOC642370  | 1.0133 | 1.0670 | 1.0069 | 0.9194 | 1.0016 | 0.0305 |
| LOC651197  | 1.0672 | 1.1003 | 0.9207 | 0.9183 | 1.0016 | 0.0479 |
| ANGPTL2    | 1.0321 | 1.1516 | 0.9199 | 0.9030 | 1.0016 | 0.0576 |

|            |        |        |        |        |        |        |
|------------|--------|--------|--------|--------|--------|--------|
| LOC1001280 | 0.9421 | 1.1250 | 1.0050 | 0.9345 | 1.0016 | 0.0440 |
| RAB35      | 0.7875 | 1.4883 | 1.0185 | 0.7123 | 1.0017 | 0.1748 |
| SPINK5     | 0.9621 | 1.0371 | 1.0458 | 0.9617 | 1.0017 | 0.0230 |
| PRIMA1     | 1.0496 | 1.0962 | 0.8949 | 0.9659 | 1.0017 | 0.0446 |
| CXCL9      | 0.9614 | 1.1098 | 1.0163 | 0.9191 | 1.0017 | 0.0412 |
| DNAJC2     | 0.9431 | 1.1154 | 1.0184 | 0.9298 | 1.0017 | 0.0426 |
| C10orf141  | 1.0181 | 1.0948 | 0.9907 | 0.9031 | 1.0017 | 0.0396 |
| FLJ43806   | 0.9632 | 1.1091 | 0.9646 | 0.9699 | 1.0017 | 0.0358 |
| LOC388152  | 0.8360 | 1.0848 | 1.0888 | 0.9972 | 1.0017 | 0.0591 |
| BEST3      | 0.9784 | 1.0958 | 0.9309 | 1.0017 | 1.0017 | 0.0347 |
| LOC646675  | 0.7674 | 1.4099 | 1.0577 | 0.7718 | 1.0017 | 0.1521 |
| LOC389053  | 0.8850 | 1.1886 | 1.0549 | 0.8783 | 1.0017 | 0.0745 |
| LOC653286  | 0.9450 | 1.0534 | 1.0991 | 0.9094 | 1.0017 | 0.0446 |
| C1orf26    | 1.0416 | 1.0840 | 0.9899 | 0.8914 | 1.0017 | 0.0415 |
| LOC440839  | 0.8606 | 1.0470 | 1.1413 | 0.9579 | 1.0017 | 0.0601 |
| LOC646772  | 0.9626 | 1.0977 | 1.0393 | 0.9072 | 1.0017 | 0.0419 |
| NOX3       | 1.0717 | 1.0815 | 0.9625 | 0.8913 | 1.0017 | 0.0456 |
| FKBP9      | 0.9702 | 1.0859 | 1.0629 | 0.8879 | 1.0017 | 0.0454 |
| ERCC-00025 | 0.9363 | 1.0789 | 1.0583 | 0.9334 | 1.0017 | 0.0389 |
| CD3D       | 0.9491 | 1.0731 | 1.0273 | 0.9575 | 1.0017 | 0.0295 |
| LOC652769  | 0.9382 | 1.0959 | 1.0988 | 0.8741 | 1.0017 | 0.0567 |
| LOC645013  | 0.9155 | 1.0649 | 1.0983 | 0.9283 | 1.0018 | 0.0467 |
| CPN1       | 0.9337 | 1.1588 | 1.0109 | 0.9035 | 1.0018 | 0.0570 |
| OR6V1      | 0.8819 | 1.0769 | 1.0679 | 0.9803 | 1.0018 | 0.0455 |
| LOC1001316 | 0.9344 | 1.1020 | 1.0427 | 0.9280 | 1.0018 | 0.0425 |
| HOXD12     | 0.9712 | 1.0316 | 1.1753 | 0.8290 | 1.0018 | 0.0718 |
| ITM2C      | 0.9291 | 1.3307 | 0.9616 | 0.7857 | 1.0018 | 0.1161 |
| CDC42      | 0.8260 | 1.3385 | 1.0748 | 0.7679 | 1.0018 | 0.1305 |
| NCRNA00200 | 0.9352 | 1.1670 | 1.0164 | 0.8885 | 1.0018 | 0.0611 |
| LOC402342  | 0.8566 | 1.1847 | 1.2052 | 0.7607 | 1.0018 | 0.1133 |
| TAC3       | 0.9336 | 1.0961 | 1.0179 | 0.9595 | 1.0018 | 0.0360 |
| SLC47A1    | 0.9302 | 1.0587 | 0.9824 | 1.0359 | 1.0018 | 0.0287 |
| FSCN2      | 0.9914 | 1.0723 | 1.0345 | 0.9090 | 1.0018 | 0.0351 |
| LOC653579  | 0.9502 | 1.1436 | 1.0022 | 0.9112 | 1.0018 | 0.0508 |
| SERPINB8   | 0.9203 | 1.0479 | 1.1159 | 0.9233 | 1.0018 | 0.0483 |
| LOC654161  | 0.8263 | 1.2191 | 1.1482 | 0.8136 | 1.0018 | 0.1060 |
| LOC728210  | 0.9362 | 1.0806 | 1.0020 | 0.9885 | 1.0018 | 0.0299 |
| L3MBTL     | 0.9534 | 1.0371 | 1.0729 | 0.9439 | 1.0018 | 0.0316 |
| GAGE10     | 0.8788 | 1.1290 | 1.0379 | 0.9617 | 1.0018 | 0.0534 |
| IFITM4P    | 0.9611 | 1.0322 | 1.0350 | 0.9791 | 1.0018 | 0.0187 |
| ASFMR1     | 0.9176 | 1.1396 | 0.9805 | 0.9697 | 1.0019 | 0.0479 |
| LOC1001291 | 0.9399 | 1.1767 | 1.1372 | 0.7536 | 1.0019 | 0.0976 |
| LOC652045  | 1.0344 | 1.0643 | 0.9842 | 0.9245 | 1.0019 | 0.0306 |
| LOC400768  | 0.9516 | 1.2144 | 0.9630 | 0.8785 | 1.0019 | 0.0733 |
| MAML1      | 0.9922 | 1.0941 | 0.9880 | 0.9332 | 1.0019 | 0.0335 |
| CEACAM20   | 0.9468 | 1.0302 | 1.0419 | 0.9886 | 1.0019 | 0.0216 |



|            |        |        |        |        |        |        |
|------------|--------|--------|--------|--------|--------|--------|
| PSORS1C3   | 0.8737 | 1.0747 | 1.0822 | 0.9770 | 1.0019 | 0.0490 |
| LOC648568  | 0.9687 | 1.0666 | 1.0236 | 0.9488 | 1.0019 | 0.0267 |
| OR2AG1     | 0.9887 | 1.0337 | 1.0860 | 0.8992 | 1.0019 | 0.0396 |
| RGSL1      | 0.9266 | 1.1052 | 1.0632 | 0.9126 | 1.0019 | 0.0484 |
| C19orf41   | 0.9605 | 1.0249 | 1.0976 | 0.9246 | 1.0019 | 0.0381 |
| NUDT17     | 0.9362 | 1.0901 | 1.0326 | 0.9488 | 1.0019 | 0.0364 |
| FEV        | 1.0445 | 1.0626 | 1.0629 | 0.8377 | 1.0019 | 0.0549 |
| UCA1       | 1.0173 | 1.0704 | 1.0237 | 0.8962 | 1.0019 | 0.0372 |
| LOC650095  | 0.9581 | 1.1955 | 1.0277 | 0.8264 | 1.0019 | 0.0768 |
| KRTAP10-3  | 0.9737 | 0.9807 | 1.0540 | 0.9993 | 1.0019 | 0.0182 |
| SHCBP1     | 0.8402 | 1.3376 | 1.0317 | 0.7982 | 1.0019 | 0.1229 |
| LOC1001301 | 0.9753 | 1.1559 | 1.0070 | 0.8695 | 1.0019 | 0.0591 |
| LOC651876  | 0.9296 | 0.9885 | 1.1611 | 0.9285 | 1.0019 | 0.0549 |
| LOC728573  | 1.0165 | 0.9796 | 1.0524 | 0.9592 | 1.0019 | 0.0206 |
| ZC3H12A    | 0.9846 | 1.2054 | 0.9659 | 0.8518 | 1.0019 | 0.0739 |
| DUX5       | 0.9552 | 1.0328 | 1.0780 | 0.9418 | 1.0019 | 0.0323 |
| LOC1001306 | 0.9785 | 1.1353 | 1.0097 | 0.8843 | 1.0019 | 0.0518 |
| KBTBD10    | 0.9671 | 1.1210 | 1.0488 | 0.8709 | 1.0019 | 0.0538 |
| LOC653881  | 0.8792 | 1.1701 | 1.1192 | 0.8393 | 1.0019 | 0.0834 |
| LOC1001307 | 0.9450 | 1.1279 | 0.9517 | 0.9831 | 1.0020 | 0.0428 |
| ECSCR      | 1.0962 | 0.8771 | 1.0751 | 0.9594 | 1.0020 | 0.0513 |
| C3orf55    | 0.9684 | 1.0564 | 1.0379 | 0.9451 | 1.0020 | 0.0268 |
| IGF2       | 0.9887 | 1.0768 | 1.0192 | 0.9231 | 1.0020 | 0.0320 |
| LOC652542  | 0.9221 | 1.1228 | 1.0074 | 0.9556 | 1.0020 | 0.0439 |
| SERPINF1   | 0.9694 | 1.0333 | 1.1358 | 0.8694 | 1.0020 | 0.0559 |
| LOC389607  | 1.0089 | 1.0391 | 1.0451 | 0.9147 | 1.0020 | 0.0301 |
| HTR3D      | 1.0090 | 1.0210 | 1.0734 | 0.9045 | 1.0020 | 0.0354 |
| LOC653841  | 0.9312 | 1.0903 | 0.9981 | 0.9883 | 1.0020 | 0.0329 |
| LOC646094  | 1.0485 | 0.9441 | 1.0694 | 0.9459 | 1.0020 | 0.0332 |
| PKHD1L1    | 0.9620 | 1.0889 | 1.0517 | 0.9054 | 1.0020 | 0.0418 |
| LOC649578  | 1.0415 | 0.9632 | 1.1013 | 0.9019 | 1.0020 | 0.0437 |
| LOC652278  | 0.8982 | 1.0034 | 1.0468 | 1.0595 | 1.0020 | 0.0366 |
| LOC728248  | 0.8619 | 1.1594 | 1.0727 | 0.9140 | 1.0020 | 0.0690 |
| PROP1      | 0.8033 | 1.1374 | 1.2048 | 0.8626 | 1.0020 | 0.0993 |
| PCDHA4     | 0.8295 | 1.1114 | 1.0675 | 0.9996 | 1.0020 | 0.0619 |
| LOC647339  | 0.9843 | 1.0702 | 1.0208 | 0.9327 | 1.0020 | 0.0290 |
| LOC1001336 | 0.9372 | 1.1615 | 1.0040 | 0.9052 | 1.0020 | 0.0570 |
| LOC1001317 | 0.9311 | 1.1497 | 1.0294 | 0.8978 | 1.0020 | 0.0566 |
| ARHGAP24   | 0.9619 | 1.0908 | 1.0178 | 0.9376 | 1.0020 | 0.0340 |
| PRDM10     | 0.8515 | 1.3625 | 0.9286 | 0.8655 | 1.0020 | 0.1213 |
| LHFPL1     | 0.9110 | 1.3061 | 0.7575 | 1.0336 | 1.0020 | 0.1160 |
| CDH13      | 0.9750 | 1.0892 | 1.0681 | 0.8759 | 1.0020 | 0.0488 |
| LOC645769  | 0.8934 | 1.0824 | 1.0689 | 0.9636 | 1.0021 | 0.0449 |
| LSAMP      | 0.9167 | 1.1945 | 1.0415 | 0.8555 | 1.0021 | 0.0749 |
| CNPY4      | 0.9743 | 1.1922 | 0.9670 | 0.8749 | 1.0021 | 0.0673 |
| AQP12A     | 0.8980 | 1.0961 | 1.0868 | 0.9274 | 1.0021 | 0.0520 |

|            |        |        |        |        |        |        |
|------------|--------|--------|--------|--------|--------|--------|
| ARHGAP26   | 0.9257 | 1.1486 | 1.0471 | 0.8869 | 1.0021 | 0.0596 |
| CAPZA3     | 1.0118 | 1.1391 | 0.9544 | 0.9031 | 1.0021 | 0.0508 |
| OR10W1     | 0.9620 | 1.1001 | 1.0560 | 0.8903 | 1.0021 | 0.0471 |
| NOX5       | 1.0428 | 1.0726 | 1.0304 | 0.8626 | 1.0021 | 0.0473 |
| SEMA5B     | 0.9853 | 1.0575 | 1.0479 | 0.9178 | 1.0021 | 0.0323 |
| OLIG1      | 1.0540 | 1.0560 | 0.9862 | 0.9122 | 1.0021 | 0.0341 |
| FUT5       | 0.9490 | 0.9796 | 1.1161 | 0.9638 | 1.0021 | 0.0385 |
| GTF2H4     | 0.9337 | 1.3315 | 0.9888 | 0.7544 | 1.0021 | 0.1207 |
| RXFP4      | 0.9420 | 1.0269 | 1.0384 | 1.0012 | 1.0021 | 0.0215 |
| TUBE1      | 0.8947 | 1.0047 | 1.1773 | 0.9318 | 1.0021 | 0.0627 |
| LOC347281  | 0.9105 | 1.1603 | 1.0225 | 0.9152 | 1.0021 | 0.0587 |
| VPS13D     | 1.0019 | 1.0907 | 0.9778 | 0.9380 | 1.0021 | 0.0323 |
| RWDD1      | 0.7304 | 1.3910 | 1.1187 | 0.7684 | 1.0021 | 0.1563 |
| CLEC14A    | 0.9717 | 1.2645 | 0.9696 | 0.8028 | 1.0021 | 0.0960 |
| LOC646918  | 1.0007 | 1.1190 | 1.1098 | 0.7791 | 1.0021 | 0.0791 |
| MDS1       | 0.9014 | 1.1739 | 1.0119 | 0.9213 | 1.0021 | 0.0621 |
| LOC1001318 | 1.0455 | 1.0460 | 1.0605 | 0.8567 | 1.0022 | 0.0486 |
| LOC652544  | 0.9356 | 1.0257 | 1.1279 | 0.9194 | 1.0022 | 0.0480 |
| PRSS2      | 0.8857 | 1.2690 | 1.0684 | 0.7855 | 1.0022 | 0.1065 |
| LOC492303  | 0.8561 | 1.2298 | 1.0204 | 0.9024 | 1.0022 | 0.0834 |
| LMCD1      | 0.9308 | 1.2065 | 0.9586 | 0.9128 | 1.0022 | 0.0688 |
| SH2D4B     | 0.9331 | 1.0281 | 1.1029 | 0.9446 | 1.0022 | 0.0397 |
| LOC727804  | 0.9807 | 1.0842 | 0.9650 | 0.9788 | 1.0022 | 0.0276 |
| NFE2       | 0.9616 | 1.0378 | 1.0711 | 0.9383 | 1.0022 | 0.0313 |
| SLC12A3    | 0.9933 | 1.0621 | 0.9793 | 0.9740 | 1.0022 | 0.0204 |
| FOXD3      | 0.8940 | 1.0120 | 1.0802 | 1.0225 | 1.0022 | 0.0391 |
| LOC442421  | 0.9733 | 1.1407 | 0.9346 | 0.9601 | 1.0022 | 0.0469 |
| LOC643285  | 0.8567 | 1.1299 | 0.9636 | 1.0586 | 1.0022 | 0.0593 |
| LOC645659  | 0.9509 | 1.2027 | 1.0816 | 0.7736 | 1.0022 | 0.0919 |
| LOC1001308 | 0.8820 | 1.1664 | 1.0649 | 0.8955 | 1.0022 | 0.0687 |
| SGPL1      | 0.9549 | 1.2099 | 1.0296 | 0.8143 | 1.0022 | 0.0824 |
| BEYLA      | 0.9664 | 1.0923 | 0.9955 | 0.9545 | 1.0022 | 0.0312 |
| FBXO15     | 0.8377 | 1.3642 | 1.0549 | 0.7519 | 1.0022 | 0.1365 |
| SNORD116-2 | 0.7880 | 1.1117 | 1.0692 | 1.0399 | 1.0022 | 0.0729 |
| EGOT       | 0.8941 | 1.1968 | 0.9086 | 1.0093 | 1.0022 | 0.0698 |
| LOC150786  | 0.9600 | 1.0738 | 1.0535 | 0.9216 | 1.0022 | 0.0366 |
| LOC648569  | 0.9456 | 1.1272 | 1.1042 | 0.8318 | 1.0022 | 0.0697 |
| LOC1001302 | 1.0158 | 0.9750 | 1.0261 | 0.9919 | 1.0022 | 0.0115 |
| KIAA1199   | 0.9779 | 1.0198 | 0.9972 | 1.0140 | 1.0022 | 0.0094 |
| LOC645891  | 0.9748 | 1.0312 | 1.1200 | 0.8829 | 1.0022 | 0.0497 |
| GS85       | 0.9600 | 1.1374 | 0.9688 | 0.9427 | 1.0022 | 0.0454 |
| FGF5       | 0.9970 | 1.0884 | 1.0307 | 0.8929 | 1.0022 | 0.0410 |
| IRX6       | 1.0614 | 0.9950 | 1.0696 | 0.8830 | 1.0022 | 0.0431 |
| LOC642788  | 0.9658 | 1.0496 | 0.9752 | 1.0184 | 1.0023 | 0.0195 |
| LOC1001334 | 0.8507 | 1.0955 | 1.1129 | 0.9499 | 1.0023 | 0.0623 |
| LOC729500  | 0.8074 | 1.3150 | 1.1793 | 0.7073 | 1.0023 | 0.1455 |

|            |        |        |        |        |        |        |
|------------|--------|--------|--------|--------|--------|--------|
| LOC643308  | 1.0285 | 0.9881 | 1.1317 | 0.8608 | 1.0023 | 0.0560 |
| SERPINB2   | 0.9776 | 1.0951 | 1.0159 | 0.9205 | 1.0023 | 0.0366 |
| LOC1001291 | 0.8337 | 1.0703 | 1.1687 | 0.9364 | 1.0023 | 0.0736 |
| MIR505     | 1.0556 | 1.0993 | 1.0065 | 0.8477 | 1.0023 | 0.0549 |
| LOC340900  | 1.0036 | 1.0363 | 1.0341 | 0.9351 | 1.0023 | 0.0236 |
| LOC652227  | 0.9522 | 1.0870 | 1.0813 | 0.8886 | 1.0023 | 0.0490 |
| C11orf2    | 0.9131 | 1.4269 | 1.0180 | 0.6513 | 1.0023 | 0.1612 |
| LOC653543  | 0.9909 | 1.0715 | 1.0516 | 0.8951 | 1.0023 | 0.0396 |
| LOC647361  | 0.9735 | 1.1970 | 1.0551 | 0.7835 | 1.0023 | 0.0863 |
| DKFZp564N2 | 0.9580 | 1.0683 | 1.0379 | 0.9451 | 1.0023 | 0.0301 |
| SPTBN2     | 0.9914 | 1.1670 | 1.1000 | 0.7510 | 1.0023 | 0.0913 |
| ETV2       | 1.0455 | 1.2384 | 0.9005 | 0.8249 | 1.0023 | 0.0910 |
| LOC1001307 | 1.0016 | 1.0517 | 1.0523 | 0.9037 | 1.0023 | 0.0349 |
| TOX        | 1.0561 | 0.9985 | 1.0537 | 0.9010 | 1.0023 | 0.0363 |
| LOC642891  | 1.0683 | 1.1062 | 0.9727 | 0.8622 | 1.0023 | 0.0545 |
| CGB5       | 0.9029 | 1.0871 | 1.0454 | 0.9740 | 1.0023 | 0.0406 |
| USP27X     | 1.2246 | 0.9108 | 0.9718 | 0.9022 | 1.0023 | 0.0757 |
| GIPC2      | 1.0162 | 1.0308 | 1.0059 | 0.9566 | 1.0024 | 0.0161 |
| C6orf1     | 0.9468 | 1.2113 | 1.0177 | 0.8336 | 1.0024 | 0.0793 |
| NEDD4      | 0.9319 | 1.1153 | 1.0724 | 0.8898 | 1.0024 | 0.0542 |
| ZNF527     | 0.8274 | 1.1598 | 1.1892 | 0.8330 | 1.0024 | 0.0996 |
| GPR132     | 0.9400 | 1.0609 | 1.0264 | 0.9822 | 1.0024 | 0.0263 |
| PTPN23     | 1.0386 | 1.1144 | 0.9152 | 0.9413 | 1.0024 | 0.0458 |
| EPYC       | 0.9344 | 1.1222 | 0.9999 | 0.9529 | 1.0024 | 0.0422 |
| CD8A       | 0.8735 | 1.1197 | 1.0395 | 0.9768 | 1.0024 | 0.0520 |
| LOC1001326 | 0.9427 | 1.1172 | 0.9965 | 0.9531 | 1.0024 | 0.0400 |
| LOC643501  | 0.9765 | 1.0835 | 0.9987 | 0.9508 | 1.0024 | 0.0287 |
| LOC643216  | 0.8979 | 1.1778 | 1.0390 | 0.8949 | 1.0024 | 0.0674 |
| POU2AF1    | 0.9015 | 1.1274 | 1.0398 | 0.9409 | 1.0024 | 0.0508 |
| LOC646796  | 0.9902 | 1.0989 | 0.9109 | 1.0096 | 1.0024 | 0.0386 |
| LOC728989  | 0.9351 | 1.1440 | 0.9842 | 0.9464 | 1.0024 | 0.0483 |
| LOC646100  | 0.9500 | 1.2231 | 0.9747 | 0.8618 | 1.0024 | 0.0775 |
| MIR921     | 0.9408 | 1.0315 | 1.1158 | 0.9217 | 1.0024 | 0.0447 |
| CAT        | 0.7546 | 1.3869 | 1.0177 | 0.8506 | 1.0024 | 0.1392 |
| LOC653501  | 0.8826 | 1.1205 | 1.0523 | 0.9544 | 1.0024 | 0.0525 |
| LOC133609  | 0.9477 | 1.0969 | 1.0636 | 0.9016 | 1.0024 | 0.0464 |
| PAX2       | 0.9324 | 1.0518 | 1.0740 | 0.9516 | 1.0024 | 0.0354 |
| LOC651648  | 1.0253 | 1.1036 | 0.9414 | 0.9394 | 1.0024 | 0.0392 |
| GABPA      | 0.9536 | 1.2389 | 1.0274 | 0.7899 | 1.0025 | 0.0931 |
| MAFK       | 0.9584 | 1.1364 | 0.9457 | 0.9693 | 1.0025 | 0.0449 |
| LOC1001339 | 0.9362 | 1.0046 | 1.0879 | 0.9812 | 1.0025 | 0.0318 |
| LOC652568  | 0.9994 | 1.1067 | 1.0149 | 0.8888 | 1.0025 | 0.0447 |
| ESRRG      | 0.9463 | 1.0722 | 1.0745 | 0.9168 | 1.0025 | 0.0414 |
| LOC653093  | 1.0492 | 1.0880 | 0.9479 | 0.9248 | 1.0025 | 0.0393 |
| LOC1001280 | 0.9521 | 1.1382 | 1.0068 | 0.9128 | 1.0025 | 0.0492 |
| CUL5       | 0.9164 | 1.2132 | 1.1580 | 0.7223 | 1.0025 | 0.1135 |

|            |        |        |        |        |        |        |
|------------|--------|--------|--------|--------|--------|--------|
| MUC17      | 0.9098 | 1.0806 | 1.0358 | 0.9837 | 1.0025 | 0.0367 |
| HMSD       | 0.9667 | 1.1152 | 1.0457 | 0.8825 | 1.0025 | 0.0502 |
| CYSLTR1    | 1.0067 | 1.0970 | 0.9478 | 0.9585 | 1.0025 | 0.0340 |
| PAM        | 0.9927 | 1.1500 | 1.0396 | 0.8278 | 1.0025 | 0.0669 |
| LOC643968  | 0.9554 | 1.0381 | 1.0428 | 0.9737 | 1.0025 | 0.0222 |
| LOC1001339 | 0.9113 | 1.2045 | 0.9994 | 0.8948 | 1.0025 | 0.0711 |
| TIGIT      | 0.8872 | 1.1158 | 0.9884 | 1.0186 | 1.0025 | 0.0471 |
| LOC1001341 | 0.9061 | 1.0814 | 1.0933 | 0.9293 | 1.0025 | 0.0493 |
| GRK7       | 0.9447 | 1.2364 | 0.9620 | 0.8671 | 1.0025 | 0.0806 |
| PRDM8      | 0.9500 | 1.0922 | 1.0798 | 0.8883 | 1.0026 | 0.0499 |
| LOC649112  | 0.9319 | 1.0519 | 1.0350 | 0.9914 | 1.0026 | 0.0268 |
| ANXA4      | 0.9105 | 1.0437 | 1.1188 | 0.9372 | 1.0026 | 0.0483 |
| PARD6G     | 1.0170 | 1.2389 | 0.9434 | 0.8110 | 1.0026 | 0.0896 |
| CSF1       | 0.9634 | 1.1327 | 1.0161 | 0.8981 | 1.0026 | 0.0496 |
| TMEM61     | 0.9635 | 1.1075 | 1.0603 | 0.8790 | 1.0026 | 0.0509 |
| LOC651580  | 1.0416 | 0.9978 | 1.0641 | 0.9069 | 1.0026 | 0.0348 |
| LOC729538  | 0.9274 | 1.0621 | 1.1000 | 0.9209 | 1.0026 | 0.0460 |
| PMP22      | 0.9596 | 1.0626 | 1.0687 | 0.9195 | 1.0026 | 0.0373 |
| MIR1302-4  | 0.9312 | 0.9963 | 1.1180 | 0.9649 | 1.0026 | 0.0407 |
| LOC441212  | 1.0505 | 1.0422 | 1.0601 | 0.8575 | 1.0026 | 0.0485 |
| DPPA5      | 0.9894 | 1.0968 | 1.0117 | 0.9125 | 1.0026 | 0.0379 |
| LOC91316   | 1.0962 | 1.0360 | 1.0782 | 0.8001 | 1.0026 | 0.0687 |
| LOC1001341 | 0.8989 | 1.2177 | 1.0413 | 0.8526 | 1.0026 | 0.0822 |
| SNORD5     | 0.9034 | 1.2529 | 1.0481 | 0.8060 | 1.0026 | 0.0971 |
| ZP2        | 0.9480 | 1.0679 | 1.0552 | 0.9394 | 1.0026 | 0.0342 |
| LOC646783  | 0.9196 | 1.1166 | 1.0069 | 0.9674 | 1.0026 | 0.0420 |
| LOXL4      | 0.9714 | 1.1099 | 1.0625 | 0.8667 | 1.0026 | 0.0537 |
| MIR19B2    | 0.9257 | 1.0964 | 0.9608 | 1.0277 | 1.0026 | 0.0377 |
| LOC643811  | 0.9651 | 1.0880 | 1.1087 | 0.8487 | 1.0026 | 0.0603 |
| PHF12      | 0.9057 | 1.3408 | 1.0051 | 0.7590 | 1.0026 | 0.1235 |
| LOC653889  | 1.0325 | 1.0890 | 1.0830 | 0.8062 | 1.0027 | 0.0667 |
| LOC650546  | 0.9678 | 1.1003 | 1.0853 | 0.8573 | 1.0027 | 0.0568 |
| ALOX15B    | 0.8940 | 1.1319 | 1.1005 | 0.8843 | 1.0027 | 0.0659 |
| RGPD1      | 0.9404 | 1.0521 | 1.1153 | 0.9028 | 1.0027 | 0.0491 |
| FAM162B    | 0.9618 | 1.0328 | 0.9823 | 1.0337 | 1.0027 | 0.0182 |
| RAF1       | 0.9520 | 1.3181 | 0.9656 | 0.7751 | 1.0027 | 0.1137 |
| LOC642756  | 0.9601 | 1.0711 | 1.0303 | 0.9491 | 1.0027 | 0.0291 |
| OBFC1      | 0.9223 | 1.3438 | 1.0329 | 0.7117 | 1.0027 | 0.1318 |
| LOC441154  | 0.8383 | 1.1770 | 1.3174 | 0.6781 | 1.0027 | 0.1477 |
| LOC1001303 | 0.9411 | 1.0220 | 1.0955 | 0.9522 | 1.0027 | 0.0357 |
| CLVS2      | 1.0628 | 0.9799 | 1.0841 | 0.8840 | 1.0027 | 0.0455 |
| KIAA1257   | 0.9222 | 1.1308 | 1.0342 | 0.9237 | 1.0027 | 0.0501 |
| LOC642231  | 0.9964 | 1.1749 | 0.9486 | 0.8909 | 1.0027 | 0.0613 |
| GKN2       | 0.9574 | 1.0713 | 1.0888 | 0.8933 | 1.0027 | 0.0467 |
| LOC649371  | 1.0063 | 1.0659 | 1.0349 | 0.9038 | 1.0027 | 0.0352 |
| ASMT       | 0.9619 | 1.0452 | 1.0721 | 0.9318 | 1.0027 | 0.0333 |

|            |        |        |        |        |        |        |
|------------|--------|--------|--------|--------|--------|--------|
| C1orf130   | 0.9039 | 0.9910 | 1.2231 | 0.8930 | 1.0027 | 0.0767 |
| GDF9       | 1.1022 | 1.1805 | 0.7913 | 0.9370 | 1.0027 | 0.0869 |
| LOC643083  | 0.9206 | 1.0386 | 1.1138 | 0.9380 | 1.0027 | 0.0452 |
| ARHGAP25   | 0.8746 | 1.0575 | 1.1007 | 0.9783 | 1.0028 | 0.0497 |
| LOC441426  | 0.8688 | 1.1683 | 1.0691 | 0.9049 | 1.0028 | 0.0703 |
| PDZK1      | 0.9233 | 1.1164 | 1.0582 | 0.9130 | 1.0028 | 0.0503 |
| LOC646882  | 0.8913 | 1.1488 | 1.0526 | 0.9184 | 1.0028 | 0.0601 |
| SH3GLB2    | 0.9770 | 1.3411 | 0.9341 | 0.7589 | 1.0028 | 0.1222 |
| ZBTB2      | 1.0243 | 1.0607 | 0.9733 | 0.9528 | 1.0028 | 0.0245 |
| WDR42C     | 0.9998 | 1.0429 | 1.0501 | 0.9183 | 1.0028 | 0.0303 |
| SYNGAP1    | 0.9683 | 1.0501 | 1.0197 | 0.9731 | 1.0028 | 0.0196 |
| LBXCOR1    | 1.0737 | 1.0525 | 0.9670 | 0.9179 | 1.0028 | 0.0365 |
| LOC442427  | 0.9477 | 1.0519 | 1.0960 | 0.9156 | 1.0028 | 0.0426 |
| PPIAP19    | 0.9962 | 1.0587 | 1.0218 | 0.9345 | 1.0028 | 0.0261 |
| ZBP1       | 0.9350 | 1.1647 | 1.0008 | 0.9106 | 1.0028 | 0.0572 |
| OPTC       | 0.9661 | 1.0829 | 1.0055 | 0.9567 | 1.0028 | 0.0287 |
| LOC652054  | 1.0252 | 1.0277 | 1.0582 | 0.9002 | 1.0028 | 0.0350 |
| IL17REL    | 0.8158 | 1.0857 | 1.0605 | 1.0493 | 1.0028 | 0.0628 |
| LOC647417  | 0.9841 | 1.0953 | 1.0491 | 0.8828 | 1.0028 | 0.0460 |
| TMEM148    | 0.9525 | 1.1132 | 0.9888 | 0.9568 | 1.0028 | 0.0377 |
| LOC644953  | 0.9465 | 1.0818 | 1.0558 | 0.9272 | 1.0028 | 0.0387 |
| WDR86      | 0.9340 | 1.0926 | 1.0786 | 0.9062 | 1.0029 | 0.0482 |
| FLJ38723   | 1.0287 | 1.1218 | 0.9198 | 0.9412 | 1.0029 | 0.0461 |
| TNFSF13    | 0.9290 | 1.1505 | 1.0779 | 0.8540 | 1.0029 | 0.0677 |
| LOC653160  | 1.0772 | 1.1010 | 0.9472 | 0.8861 | 1.0029 | 0.0516 |
| LOC651769  | 0.9098 | 1.0968 | 1.0203 | 0.9845 | 1.0029 | 0.0389 |
| LOC1001325 | 0.8956 | 1.2074 | 1.0632 | 0.8454 | 1.0029 | 0.0826 |
| C12orf28   | 0.9803 | 1.0496 | 0.9645 | 1.0171 | 1.0029 | 0.0191 |
| GTF2H2D    | 1.0948 | 1.0658 | 1.0069 | 0.8441 | 1.0029 | 0.0560 |
| LOC91661   | 1.0454 | 1.0438 | 1.0980 | 0.8243 | 1.0029 | 0.0609 |
| SSH2       | 0.8891 | 1.3705 | 0.8581 | 0.8939 | 1.0029 | 0.1228 |
| LOC643604  | 1.0538 | 1.1088 | 0.9583 | 0.8907 | 1.0029 | 0.0486 |
| LOC1002165 | 0.8336 | 1.1722 | 1.0045 | 1.0012 | 1.0029 | 0.0691 |
| RIBC2      | 0.9501 | 1.1276 | 0.9882 | 0.9456 | 1.0029 | 0.0427 |
| LOC727834  | 0.9941 | 1.1078 | 1.0065 | 0.9032 | 1.0029 | 0.0419 |
| ARMC2      | 0.8903 | 1.1446 | 1.0546 | 0.9222 | 1.0029 | 0.0591 |
| MYO16      | 0.9612 | 1.0897 | 1.0878 | 0.8729 | 1.0029 | 0.0527 |
| LOC1001314 | 0.9213 | 1.1562 | 1.0772 | 0.8569 | 1.0029 | 0.0689 |
| PLAC9      | 0.9109 | 1.1994 | 0.9709 | 0.9304 | 1.0029 | 0.0667 |
| C3orf70    | 0.9722 | 1.1300 | 1.1031 | 0.8063 | 1.0029 | 0.0740 |
| RPS25      | 0.9182 | 1.0778 | 1.0532 | 0.9625 | 1.0029 | 0.0376 |
| LOC729041  | 1.0184 | 1.1172 | 0.9912 | 0.8848 | 1.0029 | 0.0478 |
| MIR625     | 1.0056 | 0.9897 | 1.0271 | 0.9893 | 1.0029 | 0.0089 |
| DKFZP434P2 | 0.9483 | 1.2608 | 0.9137 | 0.8889 | 1.0029 | 0.0868 |
| OR9A2      | 0.9697 | 1.1085 | 1.0261 | 0.9075 | 1.0029 | 0.0427 |
| LOC649365  | 0.9758 | 1.0576 | 0.9988 | 0.9795 | 1.0029 | 0.0189 |

|            |        |        |        |        |        |        |
|------------|--------|--------|--------|--------|--------|--------|
| C10orf25   | 0.8894 | 1.1088 | 1.0411 | 0.9725 | 1.0029 | 0.0470 |
| CRISPLD2   | 1.0266 | 1.3121 | 0.8426 | 0.8304 | 1.0029 | 0.1124 |
| LOC650439  | 0.9146 | 1.1267 | 1.0265 | 0.9439 | 1.0029 | 0.0476 |
| WASF1      | 0.9366 | 1.0844 | 1.0692 | 0.9217 | 1.0029 | 0.0428 |
| LOC647904  | 0.9561 | 1.1807 | 1.0254 | 0.8496 | 1.0029 | 0.0694 |
| OVOS       | 0.9936 | 1.1311 | 0.9841 | 0.9030 | 1.0030 | 0.0473 |
| OR4K17     | 0.9679 | 1.0420 | 1.0996 | 0.9023 | 1.0030 | 0.0430 |
| LOC646570  | 0.9946 | 1.0063 | 1.0745 | 0.9364 | 1.0030 | 0.0283 |
| IFT80      | 0.9267 | 1.1910 | 0.9942 | 0.8999 | 1.0030 | 0.0658 |
| LOC1001346 | 0.9715 | 1.1385 | 1.0047 | 0.8972 | 1.0030 | 0.0505 |
| LOC641875  | 0.9256 | 1.2346 | 0.9828 | 0.8688 | 1.0030 | 0.0806 |
| C22orf43   | 0.9543 | 1.1508 | 0.9546 | 0.9523 | 1.0030 | 0.0493 |
| VENTX      | 0.9070 | 1.1871 | 1.0198 | 0.8980 | 1.0030 | 0.0673 |
| AFP        | 0.9114 | 1.0948 | 1.1025 | 0.9033 | 1.0030 | 0.0553 |
| RNF215     | 0.8681 | 1.2938 | 1.0954 | 0.7547 | 1.0030 | 0.1201 |
| LOC643920  | 0.9998 | 1.1632 | 0.9936 | 0.8555 | 1.0030 | 0.0629 |
| UBAC2      | 0.8728 | 1.3542 | 1.0499 | 0.7351 | 1.0030 | 0.1336 |
| LOC648145  | 0.9912 | 1.0877 | 1.0654 | 0.8677 | 1.0030 | 0.0496 |
| LOC1001286 | 0.9816 | 1.0590 | 1.0867 | 0.8847 | 1.0030 | 0.0453 |
| SRRM4      | 0.9192 | 1.0610 | 1.0737 | 0.9581 | 1.0030 | 0.0381 |
| FLJ43950   | 0.9496 | 1.1441 | 0.9822 | 0.9362 | 1.0030 | 0.0480 |
| ARHGEF15   | 0.9805 | 1.1298 | 0.9987 | 0.9031 | 1.0030 | 0.0471 |
| PHF2       | 0.9608 | 1.2499 | 0.8886 | 0.9128 | 1.0030 | 0.0837 |
| MYH11      | 0.9528 | 1.1609 | 1.0167 | 0.8818 | 1.0030 | 0.0594 |
| LOC654258  | 1.0287 | 1.0945 | 0.9932 | 0.8957 | 1.0030 | 0.0415 |
| ADAMDEC1   | 0.9402 | 1.1021 | 1.0238 | 0.9461 | 1.0031 | 0.0381 |
| LOC731275  | 0.8816 | 1.1547 | 1.0885 | 0.8874 | 1.0031 | 0.0698 |
| LOC1001302 | 0.9483 | 1.0908 | 0.9355 | 1.0376 | 1.0031 | 0.0370 |
| RBED1      | 0.9624 | 1.1379 | 1.1600 | 0.7520 | 1.0031 | 0.0946 |
| C18orf26   | 0.9338 | 1.0574 | 1.1285 | 0.8925 | 1.0031 | 0.0545 |
| LOC343296  | 0.9453 | 1.0577 | 1.0143 | 0.9950 | 1.0031 | 0.0233 |
| SNAP25     | 0.9640 | 1.1105 | 1.0562 | 0.8817 | 1.0031 | 0.0505 |
| HCLS1      | 0.8926 | 1.0923 | 1.1090 | 0.9184 | 1.0031 | 0.0567 |
| LOC1001296 | 0.9715 | 1.2707 | 0.9489 | 0.8212 | 1.0031 | 0.0952 |
| FAM46B     | 0.9579 | 1.1228 | 1.0322 | 0.8994 | 1.0031 | 0.0483 |
| GALNT8     | 0.9410 | 0.9864 | 1.0449 | 1.0401 | 1.0031 | 0.0246 |
| LOC645098  | 0.8922 | 1.0401 | 1.0933 | 0.9868 | 1.0031 | 0.0429 |
| AQP8       | 0.9659 | 1.1123 | 1.0828 | 0.8514 | 1.0031 | 0.0596 |
| DPP4       | 0.9761 | 1.0912 | 1.0779 | 0.8673 | 1.0031 | 0.0521 |
| LOC389105  | 0.9975 | 1.1051 | 1.0442 | 0.8656 | 1.0031 | 0.0509 |
| ZNF257     | 1.0213 | 1.0961 | 1.0352 | 0.8600 | 1.0031 | 0.0504 |
| PADI4      | 0.9968 | 1.1379 | 0.9119 | 0.9659 | 1.0031 | 0.0482 |
| LOC1001314 | 0.9056 | 1.0810 | 1.0787 | 0.9473 | 1.0031 | 0.0451 |
| VPREB3     | 0.8977 | 1.1875 | 1.0582 | 0.8692 | 1.0031 | 0.0742 |
| LOC647315  | 0.9857 | 1.0307 | 1.1206 | 0.8757 | 1.0031 | 0.0509 |
| GPR144     | 0.9883 | 1.0781 | 1.0247 | 0.9216 | 1.0032 | 0.0329 |

|             |        |        |        |        |        |        |
|-------------|--------|--------|--------|--------|--------|--------|
| MFSD11      | 0.7134 | 1.3487 | 1.1317 | 0.8189 | 1.0032 | 0.1454 |
| C10orf96    | 0.9385 | 1.1662 | 1.0163 | 0.8916 | 1.0032 | 0.0601 |
| RFT1        | 0.8935 | 1.1359 | 0.9912 | 0.9920 | 1.0032 | 0.0499 |
| UGT1A9      | 1.0084 | 1.0833 | 1.0172 | 0.9038 | 1.0032 | 0.0371 |
| DKFZp761E1! | 0.9367 | 0.9698 | 1.1625 | 0.9437 | 1.0032 | 0.0536 |
| CCDC17      | 1.0001 | 1.0125 | 1.0394 | 0.9607 | 1.0032 | 0.0164 |
| MAGEA11     | 0.9811 | 1.0919 | 1.0311 | 0.9086 | 1.0032 | 0.0388 |
| MTMR12      | 1.0440 | 1.4437 | 0.8408 | 0.6843 | 1.0032 | 0.1643 |
| LOC731496   | 0.9672 | 0.9951 | 1.0681 | 0.9824 | 1.0032 | 0.0224 |
| LOC1001347  | 0.8839 | 1.1070 | 1.1273 | 0.8946 | 1.0032 | 0.0659 |
| CHRFAM7A    | 0.9495 | 1.1509 | 0.9747 | 0.9377 | 1.0032 | 0.0498 |
| LOC340947   | 0.9686 | 1.1397 | 1.0110 | 0.8936 | 1.0032 | 0.0516 |
| SLC22A24    | 0.8756 | 1.1691 | 1.0225 | 0.9457 | 1.0032 | 0.0629 |
| IL31RA      | 0.8436 | 1.1350 | 1.1071 | 0.9271 | 1.0032 | 0.0704 |
| SLC5A9      | 0.9991 | 0.9842 | 1.0348 | 0.9948 | 1.0032 | 0.0110 |
| ERCC-00171  | 0.9046 | 1.1028 | 1.0163 | 0.9892 | 1.0032 | 0.0408 |
| LOC643069   | 0.9001 | 1.0232 | 1.1605 | 0.9292 | 1.0032 | 0.0586 |
| LOC1001289  | 0.9667 | 1.1575 | 1.0038 | 0.8850 | 1.0032 | 0.0571 |
| FHL5        | 0.9644 | 1.0356 | 1.1278 | 0.8851 | 1.0032 | 0.0517 |
| LOC647391   | 0.9648 | 1.1837 | 1.0129 | 0.8517 | 1.0032 | 0.0690 |
| LOC729462   | 0.9455 | 1.0580 | 1.0319 | 0.9776 | 1.0032 | 0.0255 |
| SP6         | 0.8826 | 1.2000 | 1.0813 | 0.8491 | 1.0033 | 0.0832 |
| DOK6        | 0.9616 | 1.2682 | 1.0096 | 0.7736 | 1.0033 | 0.1019 |
| LOC645961   | 0.9947 | 1.0920 | 0.9887 | 0.9377 | 1.0033 | 0.0322 |
| LOC642009   | 0.9206 | 1.1597 | 1.0557 | 0.8771 | 1.0033 | 0.0645 |
| HIST1H3J    | 0.9627 | 1.1000 | 1.0368 | 0.9135 | 1.0033 | 0.0410 |
| GOLGA2L1    | 0.9122 | 1.2505 | 0.9627 | 0.8877 | 1.0033 | 0.0839 |
| LOC1001697  | 1.0553 | 1.0145 | 1.0542 | 0.8891 | 1.0033 | 0.0392 |
| LOC441316   | 1.0718 | 0.8748 | 1.0520 | 1.0145 | 1.0033 | 0.0444 |
| LOC648999   | 1.0076 | 1.1348 | 0.9745 | 0.8962 | 1.0033 | 0.0497 |
| LOC1001291  | 0.9154 | 1.1235 | 1.0731 | 0.9011 | 1.0033 | 0.0559 |
| CENPN       | 1.0416 | 1.3225 | 0.9253 | 0.7238 | 1.0033 | 0.1250 |
| MYO1E       | 1.1630 | 1.0665 | 0.8996 | 0.8841 | 1.0033 | 0.0674 |
| LOC729677   | 0.9402 | 1.0825 | 1.1561 | 0.8344 | 1.0033 | 0.0719 |
| OR52J3      | 0.9834 | 1.2058 | 1.0069 | 0.8171 | 1.0033 | 0.0796 |
| SCARNA6     | 1.0031 | 1.1008 | 1.0885 | 0.8209 | 1.0033 | 0.0646 |
| LOC1001347  | 0.9493 | 0.9496 | 1.0917 | 1.0225 | 1.0033 | 0.0341 |
| LOC645927   | 0.9598 | 1.1705 | 1.0108 | 0.8722 | 1.0033 | 0.0626 |
| LOC728307   | 0.9501 | 1.1423 | 0.9816 | 0.9394 | 1.0033 | 0.0472 |
| MIR379      | 0.9420 | 1.1321 | 0.9424 | 0.9968 | 1.0033 | 0.0448 |
| PAPD4       | 0.8040 | 1.4321 | 1.0733 | 0.7039 | 1.0033 | 0.1628 |
| LOC1001334  | 0.9116 | 1.1516 | 1.0208 | 0.9294 | 1.0033 | 0.0549 |
| LOC1001318  | 0.9058 | 1.0916 | 1.1280 | 0.8880 | 1.0033 | 0.0620 |
| LOC730658   | 1.0087 | 1.1094 | 0.9719 | 0.9234 | 1.0034 | 0.0394 |
| OTUD3       | 0.8994 | 1.1870 | 1.0241 | 0.9031 | 1.0034 | 0.0677 |
| LOC730226   | 0.9435 | 1.2454 | 0.9461 | 0.8785 | 1.0034 | 0.0822 |

|            |        |        |        |        |        |        |
|------------|--------|--------|--------|--------|--------|--------|
| TTY4       | 0.9260 | 1.1199 | 1.0100 | 0.9577 | 1.0034 | 0.0425 |
| LOC642650  | 0.9767 | 1.0977 | 1.0133 | 0.9258 | 1.0034 | 0.0362 |
| LOC1001889 | 0.9844 | 1.1550 | 0.9568 | 0.9174 | 1.0034 | 0.0524 |
| MIR208B    | 1.0229 | 1.1099 | 1.0353 | 0.8455 | 1.0034 | 0.0560 |
| LOC1001895 | 0.8604 | 1.0657 | 1.1445 | 0.9430 | 1.0034 | 0.0632 |
| KCNA3      | 0.9759 | 1.0617 | 1.0196 | 0.9563 | 1.0034 | 0.0235 |
| LOC651169  | 0.8991 | 1.0965 | 1.1310 | 0.8870 | 1.0034 | 0.0642 |
| LOC1001322 | 0.9541 | 1.1134 | 0.9837 | 0.9625 | 1.0034 | 0.0372 |
| CDKL5      | 0.9319 | 1.1196 | 1.0385 | 0.9237 | 1.0034 | 0.0467 |
| SLC2A4     | 0.8661 | 1.0748 | 1.1503 | 0.9225 | 1.0034 | 0.0659 |
| ADAMTS13   | 0.9341 | 1.1278 | 1.0116 | 0.9401 | 1.0034 | 0.0451 |
| SGCA       | 0.9574 | 1.0994 | 0.9510 | 1.0059 | 1.0034 | 0.0342 |
| LOC1001292 | 1.0627 | 1.0481 | 1.0592 | 0.8438 | 1.0034 | 0.0533 |
| LOC728418  | 0.9176 | 1.1740 | 1.0428 | 0.8794 | 1.0034 | 0.0667 |
| C19orf55   | 1.0428 | 1.0715 | 0.9696 | 0.9298 | 1.0034 | 0.0326 |
| LOC644136  | 0.9256 | 1.0196 | 1.0632 | 1.0054 | 1.0034 | 0.0287 |
| C4orf43    | 0.9179 | 1.1055 | 1.0888 | 0.9015 | 1.0034 | 0.0543 |
| SNORD61    | 0.9051 | 1.1876 | 1.0420 | 0.8792 | 1.0035 | 0.0710 |
| BANF2      | 1.0320 | 0.9529 | 1.0840 | 0.9449 | 1.0035 | 0.0333 |
| FKSG83     | 1.0161 | 1.1032 | 1.0485 | 0.8462 | 1.0035 | 0.0554 |
| LOC389033  | 0.9644 | 1.0696 | 1.0254 | 0.9545 | 1.0035 | 0.0271 |
| LOC641814  | 0.9349 | 1.1034 | 1.0661 | 0.9095 | 1.0035 | 0.0478 |
| LOC643808  | 0.9209 | 1.0764 | 1.0564 | 0.9602 | 1.0035 | 0.0374 |
| C11orf44   | 0.9000 | 1.0888 | 1.0676 | 0.9576 | 1.0035 | 0.0449 |
| DEFB105A   | 0.9662 | 1.0232 | 1.0105 | 1.0141 | 1.0035 | 0.0127 |
| SLC22A25   | 0.9970 | 1.0757 | 1.0403 | 0.9009 | 1.0035 | 0.0378 |
| LOC727844  | 1.0530 | 1.1223 | 0.9777 | 0.8610 | 1.0035 | 0.0559 |
| LOC1001305 | 0.9884 | 1.0537 | 1.0228 | 0.9492 | 1.0035 | 0.0225 |
| UPP1       | 0.8907 | 1.1951 | 1.0352 | 0.8931 | 1.0035 | 0.0723 |
| MIR1298    | 0.8950 | 1.0630 | 1.0900 | 0.9660 | 1.0035 | 0.0449 |
| ADAM22     | 0.9365 | 1.0738 | 1.0968 | 0.9070 | 1.0035 | 0.0478 |
| LOC1001308 | 0.9826 | 1.0902 | 1.1023 | 0.8391 | 1.0035 | 0.0611 |
| TACR1      | 1.0091 | 1.0762 | 1.0017 | 0.9272 | 1.0035 | 0.0305 |
| LOC648729  | 1.0103 | 1.1313 | 1.0616 | 0.8110 | 1.0035 | 0.0688 |
| LOC654106  | 0.9643 | 1.0086 | 1.1333 | 0.9080 | 1.0036 | 0.0479 |
| LOC440352  | 0.7547 | 1.2628 | 1.0248 | 0.9719 | 1.0036 | 0.1043 |
| TMEM130    | 0.9514 | 1.1464 | 0.9845 | 0.9319 | 1.0036 | 0.0488 |
| MPPED2     | 0.9380 | 1.0368 | 1.0658 | 0.9737 | 1.0036 | 0.0291 |
| FPR3       | 0.9336 | 1.2520 | 0.8504 | 0.9784 | 1.0036 | 0.0870 |
| LOC1001332 | 1.0109 | 1.1128 | 1.0409 | 0.8497 | 1.0036 | 0.0556 |
| LOC728448  | 0.9568 | 1.0554 | 1.0686 | 0.9335 | 1.0036 | 0.0342 |
| CNTROB     | 0.8965 | 1.2396 | 0.9219 | 0.9563 | 1.0036 | 0.0796 |
| LOC1001337 | 1.0333 | 1.1417 | 0.9258 | 0.9136 | 1.0036 | 0.0533 |
| CYP2A7     | 0.8993 | 1.1458 | 0.9379 | 1.0313 | 1.0036 | 0.0549 |
| LOC643729  | 0.9724 | 1.0769 | 1.0138 | 0.9512 | 1.0036 | 0.0277 |
| DLGAP2     | 1.0099 | 1.0439 | 1.0667 | 0.8939 | 1.0036 | 0.0384 |



|            |        |        |        |        |        |        |
|------------|--------|--------|--------|--------|--------|--------|
| LOC648801  | 1.0146 | 1.1648 | 0.9478 | 0.8872 | 1.0036 | 0.0597 |
| FUCA1      | 0.8385 | 1.3795 | 1.0981 | 0.6983 | 1.0036 | 0.1502 |
| DEFA5      | 0.9535 | 1.1239 | 0.9818 | 0.9554 | 1.0036 | 0.0406 |
| LOC641522  | 0.9290 | 1.1151 | 0.9821 | 0.9883 | 1.0036 | 0.0395 |
| LOC441007  | 0.9529 | 1.2200 | 0.9651 | 0.8765 | 1.0036 | 0.0748 |
| LOC651212  | 1.0006 | 1.1388 | 0.9749 | 0.9003 | 1.0036 | 0.0498 |
| LOC729516  | 1.0607 | 1.0552 | 0.9721 | 0.9266 | 1.0037 | 0.0327 |
| LOC1001335 | 0.9864 | 1.0588 | 1.0292 | 0.9403 | 1.0037 | 0.0258 |
| SOX6       | 0.9305 | 1.1529 | 1.0164 | 0.9149 | 1.0037 | 0.0545 |
| LOC1001339 | 0.8697 | 1.2109 | 0.9329 | 1.0013 | 1.0037 | 0.0741 |
| BMP4       | 0.8609 | 1.1389 | 1.1050 | 0.9099 | 1.0037 | 0.0694 |
| LOC642820  | 0.9932 | 1.0432 | 1.1460 | 0.8323 | 1.0037 | 0.0654 |
| SHH        | 1.0049 | 1.1227 | 1.0624 | 0.8248 | 1.0037 | 0.0643 |
| C6orf176   | 0.8786 | 1.1327 | 1.1075 | 0.8960 | 1.0037 | 0.0675 |
| LOC653643  | 0.9300 | 0.9999 | 1.1223 | 0.9625 | 1.0037 | 0.0420 |
| DLX5       | 0.8643 | 1.1488 | 1.0679 | 0.9337 | 1.0037 | 0.0642 |
| NFATC2     | 1.0058 | 1.0525 | 0.9639 | 0.9926 | 1.0037 | 0.0185 |
| LOC649466  | 0.9824 | 1.1273 | 0.9362 | 0.9690 | 1.0037 | 0.0423 |
| BACH2      | 0.9991 | 1.0573 | 1.0228 | 0.9357 | 1.0037 | 0.0256 |
| CXCL10     | 0.8178 | 1.2202 | 1.1017 | 0.8752 | 1.0037 | 0.0947 |
| LOC641901  | 0.9494 | 1.1233 | 1.0248 | 0.9174 | 1.0037 | 0.0458 |
| C6orf185   | 0.9560 | 1.0225 | 1.0099 | 1.0266 | 1.0037 | 0.0163 |
| RXRG       | 0.9680 | 1.0089 | 1.0794 | 0.9588 | 1.0037 | 0.0275 |
| LOC728882  | 0.9170 | 1.0403 | 1.1060 | 0.9516 | 1.0037 | 0.0428 |
| OR2A25     | 1.0002 | 1.1514 | 0.9959 | 0.8675 | 1.0037 | 0.0580 |
| LOC641944  | 0.9044 | 1.0804 | 1.1557 | 0.8745 | 1.0038 | 0.0680 |
| LOC647832  | 0.9176 | 0.9897 | 1.0821 | 1.0256 | 1.0038 | 0.0344 |
| LOC644074  | 0.9480 | 1.1614 | 0.9546 | 0.9510 | 1.0038 | 0.0526 |
| LOC649073  | 1.0477 | 1.0987 | 1.0303 | 0.8384 | 1.0038 | 0.0570 |
| LOC654206  | 0.9294 | 1.0571 | 1.0693 | 0.9593 | 1.0038 | 0.0349 |
| MIR1274B   | 0.9287 | 1.1199 | 1.0387 | 0.9279 | 1.0038 | 0.0466 |
| PLCXD1     | 1.1006 | 1.2942 | 0.8218 | 0.7986 | 1.0038 | 0.1187 |
| KILLIN     | 1.0281 | 1.0471 | 1.0565 | 0.8834 | 1.0038 | 0.0406 |
| LOC646215  | 0.9675 | 1.0243 | 1.1017 | 0.9217 | 1.0038 | 0.0388 |
| HOXA1      | 0.9896 | 1.0458 | 1.0742 | 0.9056 | 1.0038 | 0.0371 |
| C20orf194  | 0.9717 | 1.0922 | 1.0341 | 0.9172 | 1.0038 | 0.0379 |
| BCMO1      | 0.9070 | 1.1359 | 1.0642 | 0.9082 | 1.0038 | 0.0575 |
| GLIPR1L1   | 0.9411 | 1.1187 | 0.9909 | 0.9646 | 1.0038 | 0.0396 |
| LOC728145  | 0.9721 | 1.0971 | 1.0566 | 0.8895 | 1.0038 | 0.0462 |
| UTS2       | 0.8994 | 1.1455 | 1.0440 | 0.9265 | 1.0038 | 0.0567 |
| NSUN7      | 0.9564 | 1.1289 | 1.0287 | 0.9014 | 1.0039 | 0.0492 |
| LOC646372  | 0.8913 | 1.1650 | 0.9968 | 0.9624 | 1.0039 | 0.0580 |
| KHDC1      | 0.9278 | 1.1264 | 1.1047 | 0.8565 | 1.0039 | 0.0663 |
| LOC400927  | 0.9166 | 1.1131 | 0.8925 | 1.0933 | 1.0039 | 0.0577 |
| LOC729722  | 1.0313 | 1.0577 | 0.9777 | 0.9488 | 1.0039 | 0.0248 |
| LOC440013  | 0.9451 | 1.0977 | 1.0212 | 0.9516 | 1.0039 | 0.0357 |

|            |        |        |        |        |        |        |
|------------|--------|--------|--------|--------|--------|--------|
| LOC1001309 | 0.9112 | 1.1795 | 1.0940 | 0.8309 | 1.0039 | 0.0804 |
| LOC1001304 | 0.9379 | 1.1345 | 1.1357 | 0.8076 | 1.0039 | 0.0803 |
| ZNF821     | 0.9592 | 1.3463 | 0.9756 | 0.7346 | 1.0039 | 0.1267 |
| EEF1A2     | 0.9305 | 1.2803 | 0.9319 | 0.8731 | 1.0039 | 0.0931 |
| ZNF564     | 0.9377 | 1.2358 | 1.0675 | 0.7746 | 1.0039 | 0.0978 |
| LOC646548  | 0.9563 | 1.0895 | 1.0454 | 0.9247 | 1.0039 | 0.0383 |
| CDCP2      | 0.9803 | 0.9314 | 1.1315 | 0.9725 | 1.0040 | 0.0439 |
| ZNF639     | 1.0473 | 0.9913 | 1.0481 | 0.9292 | 1.0040 | 0.0282 |
| TMOD2      | 0.8852 | 1.1665 | 1.0303 | 0.9339 | 1.0040 | 0.0620 |
| LOC1001300 | 0.9697 | 1.0783 | 1.0824 | 0.8855 | 1.0040 | 0.0473 |
| UNC5C      | 1.0264 | 1.1453 | 1.0242 | 0.8200 | 1.0040 | 0.0675 |
| C1orf103   | 0.9156 | 1.1370 | 1.0801 | 0.8832 | 1.0040 | 0.0618 |
| LOC440080  | 0.9956 | 1.0542 | 1.0407 | 0.9255 | 1.0040 | 0.0290 |
| CELP       | 1.0455 | 1.0815 | 1.0356 | 0.8534 | 1.0040 | 0.0511 |
| ITGA7      | 0.9479 | 1.0563 | 1.0293 | 0.9826 | 1.0040 | 0.0241 |
| IFNA2      | 0.9036 | 0.9752 | 1.1574 | 0.9799 | 1.0040 | 0.0540 |
| LOC389705  | 1.0034 | 1.1686 | 0.9577 | 0.8863 | 1.0040 | 0.0599 |
| KCNJ15     | 0.9060 | 1.0789 | 1.0892 | 0.9419 | 1.0040 | 0.0468 |
| BRUNOL5    | 0.8424 | 1.1145 | 1.1235 | 0.9356 | 1.0040 | 0.0691 |
| BLOC1S3    | 0.9699 | 1.0006 | 1.0493 | 0.9962 | 1.0040 | 0.0166 |
| LOC1001280 | 1.0165 | 1.0951 | 1.0240 | 0.8805 | 1.0040 | 0.0448 |
| CYLN2      | 0.9711 | 1.2108 | 0.9857 | 0.8485 | 1.0040 | 0.0755 |
| IL4I1      | 1.0156 | 1.0491 | 0.9546 | 0.9968 | 1.0040 | 0.0197 |
| PSPN       | 0.8919 | 1.0801 | 0.9753 | 1.0688 | 1.0040 | 0.0441 |
| BTBD11     | 0.9851 | 1.0698 | 1.0229 | 0.9384 | 1.0040 | 0.0279 |
| LOC643302  | 0.9791 | 1.0517 | 1.1247 | 0.8606 | 1.0040 | 0.0563 |
| LOC644056  | 0.9619 | 1.1112 | 0.9740 | 0.9691 | 1.0041 | 0.0358 |
| GLP2R      | 0.9844 | 1.0525 | 0.9807 | 0.9986 | 1.0041 | 0.0166 |
| EFCAB1     | 0.9836 | 1.1174 | 0.9953 | 0.9199 | 1.0041 | 0.0412 |
| LOC1001311 | 0.9654 | 1.1934 | 1.0074 | 0.8500 | 1.0041 | 0.0714 |
| GLRA3      | 0.9271 | 1.1234 | 1.0256 | 0.9402 | 1.0041 | 0.0454 |
| LOC653034  | 0.8510 | 1.1287 | 1.0258 | 1.0108 | 1.0041 | 0.0574 |
| LOC648309  | 0.8820 | 1.0398 | 1.0959 | 0.9986 | 1.0041 | 0.0453 |
| PTF1A      | 0.9653 | 1.1459 | 0.9874 | 0.9178 | 1.0041 | 0.0495 |
| PDE7B      | 1.0200 | 1.0324 | 1.0888 | 0.8751 | 1.0041 | 0.0455 |
| C19orf16   | 1.0048 | 1.0500 | 1.0123 | 0.9495 | 1.0041 | 0.0207 |
| LOC1001343 | 1.0367 | 1.0211 | 1.0458 | 0.9129 | 1.0041 | 0.0308 |
| C8orf16    | 1.0028 | 1.0591 | 1.0522 | 0.9025 | 1.0041 | 0.0361 |
| AREG       | 0.9653 | 1.0774 | 1.0679 | 0.9060 | 1.0042 | 0.0414 |
| TTY3B      | 0.9620 | 1.1251 | 1.0197 | 0.9097 | 1.0042 | 0.0462 |
| ZNF396     | 0.9711 | 1.0814 | 1.0434 | 0.9207 | 1.0042 | 0.0360 |
| LOC646494  | 0.9389 | 1.1526 | 1.0455 | 0.8797 | 1.0042 | 0.0602 |
| LOC649903  | 0.8652 | 1.0721 | 1.1521 | 0.9272 | 1.0042 | 0.0656 |
| LOC644556  | 0.9779 | 1.1601 | 0.9409 | 0.9378 | 1.0042 | 0.0528 |
| AS3MT      | 0.9705 | 1.0679 | 1.0863 | 0.8920 | 1.0042 | 0.0452 |
| LHFP       | 0.8181 | 1.2870 | 0.9596 | 0.9520 | 1.0042 | 0.0997 |

|            |        |        |        |        |        |        |
|------------|--------|--------|--------|--------|--------|--------|
| MIR449A    | 0.8737 | 1.1186 | 1.0785 | 0.9459 | 1.0042 | 0.0570 |
| C4orf44    | 0.9485 | 1.1117 | 1.0612 | 0.8954 | 1.0042 | 0.0498 |
| LOC651141  | 0.9572 | 1.0230 | 1.0195 | 1.0171 | 1.0042 | 0.0157 |
| LOC1001299 | 1.0054 | 1.0510 | 1.0701 | 0.8904 | 1.0042 | 0.0403 |
| DEFB110    | 0.9360 | 1.1182 | 1.0659 | 0.8968 | 1.0042 | 0.0524 |
| GOLGA2LY1  | 0.8065 | 1.2346 | 1.0222 | 0.9536 | 1.0042 | 0.0890 |
| SLC8A3     | 0.9770 | 1.0632 | 1.0695 | 0.9072 | 1.0042 | 0.0386 |
| BLOC1S2    | 0.9419 | 1.1365 | 1.0402 | 0.8983 | 1.0042 | 0.0532 |
| TSGA10IP   | 0.9929 | 1.0691 | 1.0313 | 0.9236 | 1.0042 | 0.0310 |
| STK32B     | 0.8988 | 1.1572 | 1.0744 | 0.8866 | 1.0042 | 0.0666 |
| PKD1       | 1.0669 | 1.0946 | 0.9667 | 0.8889 | 1.0043 | 0.0473 |
| LOC1001288 | 0.9684 | 1.0383 | 1.1090 | 0.9013 | 1.0043 | 0.0447 |
| KCNT2      | 0.9881 | 1.0531 | 1.0755 | 0.9004 | 1.0043 | 0.0393 |
| WFDC6      | 1.0199 | 1.0515 | 0.9570 | 0.9887 | 1.0043 | 0.0203 |
| DEFB106B   | 0.9377 | 1.1001 | 0.9932 | 0.9861 | 1.0043 | 0.0342 |
| PNOC       | 0.9258 | 1.2240 | 1.0328 | 0.8345 | 1.0043 | 0.0837 |
| FXVD6      | 0.9245 | 1.1543 | 1.0088 | 0.9295 | 1.0043 | 0.0536 |
| LOC442459  | 0.9224 | 1.2878 | 0.8963 | 0.9107 | 1.0043 | 0.0947 |
| GSN        | 0.9358 | 1.1171 | 1.0284 | 0.9358 | 1.0043 | 0.0435 |
| TMEM90B    | 1.0104 | 1.0155 | 1.0395 | 0.9517 | 1.0043 | 0.0187 |
| LCE5A      | 0.9688 | 1.1338 | 1.0370 | 0.8776 | 1.0043 | 0.0541 |
| ASB4       | 0.9688 | 1.1387 | 1.0305 | 0.8791 | 1.0043 | 0.0545 |
| TBX20      | 0.9525 | 1.0873 | 1.0231 | 0.9543 | 1.0043 | 0.0322 |
| AFM        | 0.9822 | 0.9649 | 1.1238 | 0.9463 | 1.0043 | 0.0405 |
| LOC1001335 | 0.9099 | 1.1464 | 0.9715 | 0.9895 | 1.0043 | 0.0503 |
| OR8U1      | 0.9477 | 1.0564 | 1.0868 | 0.9263 | 1.0043 | 0.0396 |
| LOC651326  | 0.9841 | 1.0890 | 0.9586 | 0.9856 | 1.0043 | 0.0289 |
| FLJ35282   | 0.9570 | 1.0839 | 0.8973 | 1.0791 | 1.0043 | 0.0462 |
| MBNL2      | 0.9890 | 1.0463 | 0.9927 | 0.9894 | 1.0043 | 0.0140 |
| WDR19      | 1.0229 | 1.4633 | 0.8312 | 0.6998 | 1.0043 | 0.1668 |
| ANKRD34C   | 1.0195 | 1.0681 | 1.0113 | 0.9184 | 1.0043 | 0.0313 |
| LOC1001292 | 1.0219 | 1.1450 | 1.0446 | 0.8059 | 1.0043 | 0.0714 |
| TSIX       | 0.9085 | 1.2614 | 1.0483 | 0.7992 | 1.0044 | 0.0997 |
| HPDL       | 0.9869 | 1.0665 | 1.0229 | 0.9411 | 1.0044 | 0.0266 |
| LOC728532  | 0.8004 | 1.3482 | 1.1278 | 0.7411 | 1.0044 | 0.1427 |
| CYP27B1    | 1.0294 | 0.9852 | 1.1306 | 0.8723 | 1.0044 | 0.0535 |
| COL14A1    | 0.9361 | 1.0849 | 1.0323 | 0.9643 | 1.0044 | 0.0336 |
| HDAC7A     | 0.9037 | 1.1128 | 1.0842 | 0.9168 | 1.0044 | 0.0547 |
| FRMD4B     | 0.9649 | 1.1032 | 1.0160 | 0.9335 | 1.0044 | 0.0371 |
| IGFBP4     | 0.9305 | 1.0113 | 1.1567 | 0.9191 | 1.0044 | 0.0548 |
| LOC652635  | 1.0976 | 0.9962 | 1.1219 | 0.8019 | 1.0044 | 0.0728 |
| MYOT       | 0.8824 | 1.1465 | 1.0279 | 0.9609 | 1.0044 | 0.0559 |
| LOC728553  | 0.9705 | 1.1093 | 1.0768 | 0.8610 | 1.0044 | 0.0563 |
| FGF19      | 0.8712 | 1.1173 | 0.9303 | 1.0990 | 1.0044 | 0.0612 |
| SIPA1L3    | 0.8706 | 1.2575 | 0.9003 | 0.9893 | 1.0044 | 0.0880 |
| LOC387770  | 0.9346 | 1.1068 | 1.1039 | 0.8724 | 1.0044 | 0.0596 |

|            |        |        |        |        |        |        |
|------------|--------|--------|--------|--------|--------|--------|
| LAX1       | 0.9406 | 0.9076 | 1.1815 | 0.9881 | 1.0044 | 0.0613 |
| LOC649276  | 0.9338 | 1.1038 | 0.9522 | 1.0279 | 1.0044 | 0.0389 |
| SULT1A2    | 0.9805 | 1.2009 | 1.0233 | 0.8131 | 1.0045 | 0.0797 |
| HAPLN1     | 1.0736 | 1.0329 | 0.9716 | 0.9398 | 1.0045 | 0.0301 |
| LOC651668  | 0.9402 | 1.1729 | 0.9407 | 0.9641 | 1.0045 | 0.0564 |
| TCTN1      | 0.9725 | 1.4799 | 0.8647 | 0.7008 | 1.0045 | 0.1680 |
| PDIA3      | 0.9495 | 1.1414 | 1.0231 | 0.9039 | 1.0045 | 0.0518 |
| KCNJ14     | 0.9086 | 1.1340 | 1.0626 | 0.9127 | 1.0045 | 0.0561 |
| PCDHB15    | 0.9395 | 1.0719 | 1.1258 | 0.8807 | 1.0045 | 0.0569 |
| OR5AK2     | 1.0781 | 0.9941 | 1.0284 | 0.9173 | 1.0045 | 0.0338 |
| HYALP1     | 0.9005 | 1.1343 | 1.0549 | 0.9283 | 1.0045 | 0.0548 |
| HOXD3      | 0.8371 | 1.2038 | 0.9887 | 0.9883 | 1.0045 | 0.0754 |
| CXorf22    | 0.9636 | 1.0632 | 1.0070 | 0.9842 | 1.0045 | 0.0215 |
| LOC647654  | 0.9428 | 1.0365 | 1.0156 | 1.0230 | 1.0045 | 0.0210 |
| LOC644943  | 0.8441 | 1.1486 | 1.0370 | 0.9882 | 1.0045 | 0.0631 |
| DEFB131    | 0.9689 | 1.0253 | 1.0620 | 0.9617 | 1.0045 | 0.0239 |
| TNXB       | 0.9765 | 1.1481 | 1.0176 | 0.8758 | 1.0045 | 0.0564 |
| LOC648868  | 1.0025 | 1.0502 | 1.0512 | 0.9142 | 1.0045 | 0.0322 |
| PGBD1      | 1.0593 | 1.0312 | 1.0455 | 0.8820 | 1.0045 | 0.0412 |
| LOC1001318 | 1.0021 | 1.1156 | 0.9989 | 0.9015 | 1.0045 | 0.0438 |
| CEACAM21   | 0.9662 | 1.2451 | 0.9453 | 0.8616 | 1.0045 | 0.0833 |
| MUC20      | 0.9816 | 1.1194 | 1.0223 | 0.8948 | 1.0045 | 0.0466 |
| NLRP5      | 0.9672 | 1.0961 | 1.1355 | 0.8193 | 1.0045 | 0.0714 |
| OR4K1      | 1.0160 | 0.9918 | 1.0329 | 0.9774 | 1.0045 | 0.0124 |
| KCNK7      | 1.0310 | 1.0268 | 1.0377 | 0.9226 | 1.0045 | 0.0274 |
| GJD2       | 1.0118 | 1.1752 | 1.0275 | 0.8037 | 1.0045 | 0.0764 |
| LOC1001283 | 0.9405 | 1.1658 | 1.0265 | 0.8854 | 1.0046 | 0.0611 |
| ZNF611     | 0.9741 | 1.0677 | 1.0657 | 0.9107 | 1.0046 | 0.0381 |
| LOC645811  | 0.9900 | 1.0473 | 1.0103 | 0.9706 | 1.0046 | 0.0164 |
| HSFY1      | 1.0170 | 1.0127 | 0.9984 | 0.9902 | 1.0046 | 0.0062 |
| IFNK       | 0.9164 | 1.0003 | 1.1543 | 0.9472 | 1.0046 | 0.0528 |
| MIR25      | 0.9575 | 1.1387 | 1.0273 | 0.8946 | 1.0046 | 0.0523 |
| LOC651771  | 0.9144 | 1.0963 | 1.1042 | 0.9034 | 1.0046 | 0.0553 |
| SNX14      | 0.9984 | 1.1319 | 1.1009 | 0.7870 | 1.0046 | 0.0779 |
| LOC388524  | 0.9634 | 1.1501 | 1.0300 | 0.8747 | 1.0046 | 0.0580 |
| LOC642566  | 0.9103 | 1.0624 | 1.1102 | 0.9354 | 1.0046 | 0.0484 |
| LOC389396  | 0.9705 | 1.0293 | 1.0441 | 0.9744 | 1.0046 | 0.0188 |
| FLJ45079   | 0.9180 | 1.0931 | 1.0654 | 0.9417 | 1.0046 | 0.0438 |
| ELP4       | 0.8217 | 1.4008 | 1.0057 | 0.7901 | 1.0046 | 0.1404 |
| LOC653545  | 0.9548 | 1.0797 | 1.1751 | 0.8088 | 1.0046 | 0.0794 |
| DUX4C      | 0.9974 | 0.9965 | 1.0062 | 1.0182 | 1.0046 | 0.0051 |
| ERCC-00136 | 0.9697 | 1.0402 | 1.0418 | 0.9666 | 1.0046 | 0.0210 |
| LOC642062  | 1.1055 | 0.9472 | 1.0859 | 0.8798 | 1.0046 | 0.0545 |
| MIR1267    | 1.0477 | 1.0697 | 1.0019 | 0.8990 | 1.0046 | 0.0379 |
| LOC1001313 | 0.9206 | 1.1536 | 0.9945 | 0.9496 | 1.0046 | 0.0520 |
| LOC652468  | 0.9111 | 1.0598 | 1.0635 | 0.9840 | 1.0046 | 0.0362 |

|            |        |        |        |        |        |        |
|------------|--------|--------|--------|--------|--------|--------|
| LOC648205  | 0.9644 | 1.1112 | 1.0624 | 0.8805 | 1.0046 | 0.0514 |
| LOC392467  | 0.8586 | 1.1691 | 1.0492 | 0.9415 | 1.0046 | 0.0673 |
| GALNT2     | 0.9217 | 1.1332 | 1.1362 | 0.8273 | 1.0046 | 0.0776 |
| ITLN2      | 0.9490 | 1.0838 | 0.9786 | 1.0071 | 1.0046 | 0.0289 |
| LOC646089  | 0.9279 | 1.1290 | 0.9793 | 0.9823 | 1.0046 | 0.0433 |
| LOC652593  | 1.0685 | 1.0759 | 1.0059 | 0.8681 | 1.0046 | 0.0481 |
| NDUFAF1    | 0.8007 | 1.5923 | 0.9349 | 0.6906 | 1.0046 | 0.2022 |
| LRIG2      | 0.9019 | 1.2741 | 0.9904 | 0.8522 | 1.0046 | 0.0943 |
| LOC728400  | 0.9515 | 1.1841 | 0.9805 | 0.9025 | 1.0047 | 0.0619 |
| C20orf196  | 1.0034 | 1.1555 | 0.9995 | 0.8602 | 1.0047 | 0.0603 |
| GAL3ST3    | 0.8792 | 1.1596 | 1.0617 | 0.9182 | 1.0047 | 0.0649 |
| FLRT1      | 1.0358 | 1.1802 | 0.9565 | 0.8462 | 1.0047 | 0.0702 |
| C11orf37   | 0.9416 | 1.0770 | 1.1281 | 0.8720 | 1.0047 | 0.0592 |
| LOC653786  | 0.9620 | 1.2577 | 0.9449 | 0.8542 | 1.0047 | 0.0876 |
| C1orf166   | 0.9602 | 1.3159 | 0.9306 | 0.8120 | 1.0047 | 0.1086 |
| MIR9-1     | 0.9905 | 1.0876 | 1.0554 | 0.8852 | 1.0047 | 0.0447 |
| SRCAP      | 0.9874 | 1.1480 | 1.0524 | 0.8310 | 1.0047 | 0.0666 |
| PECAM1     | 0.9869 | 1.2378 | 0.8411 | 0.9530 | 1.0047 | 0.0837 |
| CCDC158    | 0.9280 | 1.1573 | 0.9589 | 0.9745 | 1.0047 | 0.0518 |
| LOC648809  | 0.9365 | 1.0240 | 1.1199 | 0.9384 | 1.0047 | 0.0435 |
| LY6G6D     | 1.0873 | 1.0683 | 0.9614 | 0.9018 | 1.0047 | 0.0441 |
| LOC643547  | 0.9763 | 1.1014 | 1.0634 | 0.8778 | 1.0047 | 0.0497 |
| LBX1       | 0.9723 | 1.0610 | 1.0383 | 0.9472 | 1.0047 | 0.0269 |
| LOC648438  | 1.0237 | 1.0669 | 0.9699 | 0.9584 | 1.0047 | 0.0252 |
| FER1L3     | 1.0445 | 1.1282 | 0.9771 | 0.8691 | 1.0047 | 0.0548 |
| BAI3       | 0.9147 | 1.1653 | 1.0919 | 0.8471 | 1.0047 | 0.0743 |
| LOC732157  | 0.8792 | 1.0747 | 1.1448 | 0.9202 | 1.0047 | 0.0629 |
| LOC644652  | 0.9395 | 1.0446 | 1.0955 | 0.9394 | 1.0047 | 0.0391 |
| C9orf11    | 1.0186 | 1.0137 | 1.0607 | 0.9260 | 1.0047 | 0.0283 |
| NME4       | 0.8916 | 1.1417 | 1.0226 | 0.9632 | 1.0048 | 0.0529 |
| CDK6       | 0.8927 | 1.2586 | 1.0183 | 0.8494 | 1.0048 | 0.0919 |
| OR6C1      | 0.9982 | 0.9855 | 1.1011 | 0.9343 | 1.0048 | 0.0349 |
| LOC728032  | 0.9854 | 0.9783 | 1.1307 | 0.9248 | 1.0048 | 0.0441 |
| LOC644824  | 0.9425 | 0.9697 | 1.1093 | 0.9977 | 1.0048 | 0.0366 |
| SERPING1   | 0.9644 | 1.0709 | 1.0268 | 0.9570 | 1.0048 | 0.0270 |
| DKFZp434K1 | 0.9393 | 1.1909 | 0.9730 | 0.9160 | 1.0048 | 0.0631 |
| CARD14     | 0.9602 | 1.1086 | 1.0725 | 0.8780 | 1.0048 | 0.0528 |
| LOC728295  | 1.0408 | 1.0187 | 1.1239 | 0.8358 | 1.0048 | 0.0607 |
| GOLGA6B    | 0.9153 | 1.1357 | 1.0043 | 0.9639 | 1.0048 | 0.0473 |
| LOC283412  | 0.7424 | 1.4399 | 1.0563 | 0.7806 | 1.0048 | 0.1610 |
| FLJ90650   | 0.9748 | 1.0042 | 1.0286 | 1.0117 | 1.0048 | 0.0112 |
| LOC652683  | 0.9666 | 1.1664 | 0.9795 | 0.9068 | 1.0048 | 0.0561 |
| LOC283711  | 0.8740 | 0.9514 | 1.0907 | 1.1032 | 1.0048 | 0.0556 |
| LOC647406  | 1.0199 | 1.0275 | 1.0946 | 0.8774 | 1.0048 | 0.0457 |
| LOC647816  | 0.8907 | 1.1086 | 1.0757 | 0.9445 | 1.0049 | 0.0520 |
| LOC643043  | 0.9215 | 1.0613 | 1.0685 | 0.9681 | 1.0049 | 0.0360 |

|            |        |        |        |        |        |        |
|------------|--------|--------|--------|--------|--------|--------|
| GNG3       | 0.9775 | 1.0838 | 1.0172 | 0.9410 | 1.0049 | 0.0306 |
| LOC651481  | 0.9438 | 1.0970 | 1.0726 | 0.9061 | 1.0049 | 0.0471 |
| GAST       | 0.9823 | 1.0457 | 0.9904 | 1.0011 | 1.0049 | 0.0142 |
| POU3F1     | 1.0071 | 1.0965 | 1.0056 | 0.9103 | 1.0049 | 0.0380 |
| C6orf27    | 0.9998 | 1.0450 | 1.1153 | 0.8595 | 1.0049 | 0.0540 |
| LOC649292  | 0.9556 | 1.1120 | 1.0568 | 0.8952 | 1.0049 | 0.0488 |
| LILRB3     | 0.7523 | 1.5714 | 1.0099 | 0.6860 | 1.0049 | 0.2013 |
| RNF175     | 0.9312 | 1.1744 | 1.0293 | 0.8848 | 1.0049 | 0.0640 |
| GREM1      | 0.9372 | 1.1699 | 1.0188 | 0.8937 | 1.0049 | 0.0608 |
| TTC34      | 0.9425 | 1.0597 | 1.0560 | 0.9615 | 1.0049 | 0.0308 |
| LOC1001346 | 1.0021 | 1.0891 | 0.9886 | 0.9400 | 1.0049 | 0.0311 |
| C6orf163   | 0.9600 | 1.1700 | 1.0845 | 0.8053 | 1.0049 | 0.0793 |
| LOC651397  | 0.9983 | 1.0879 | 1.0351 | 0.8985 | 1.0049 | 0.0400 |
| TCP10L2    | 0.9894 | 0.9854 | 1.0446 | 1.0004 | 1.0050 | 0.0136 |
| LOC651333  | 1.0042 | 1.0553 | 1.0951 | 0.8652 | 1.0050 | 0.0502 |
| C16orf70   | 0.8610 | 1.4426 | 1.0029 | 0.7132 | 1.0050 | 0.1574 |
| SNORA71C   | 0.8756 | 1.1559 | 1.0086 | 0.9798 | 1.0050 | 0.0578 |
| LOC727764  | 1.1164 | 1.0141 | 1.0085 | 0.8809 | 1.0050 | 0.0482 |
| LOC642867  | 0.9470 | 1.0560 | 1.0052 | 1.0117 | 1.0050 | 0.0224 |
| LOC641727  | 0.9610 | 1.1155 | 1.1362 | 0.8071 | 1.0050 | 0.0767 |
| LOC1001288 | 0.9381 | 1.1066 | 1.0302 | 0.9450 | 1.0050 | 0.0398 |
| ATF7IP2    | 0.9561 | 1.0928 | 1.0093 | 0.9618 | 1.0050 | 0.0316 |
| C14orf11   | 0.9738 | 1.1095 | 1.0542 | 0.8825 | 1.0050 | 0.0494 |
| TACR2      | 0.8988 | 1.1296 | 1.0488 | 0.9428 | 1.0050 | 0.0521 |
| MIR101-1   | 0.9647 | 1.1515 | 0.9960 | 0.9078 | 1.0050 | 0.0521 |
| GPR137C    | 0.9014 | 1.0822 | 1.1042 | 0.9323 | 1.0050 | 0.0515 |
| LACTB2     | 0.8236 | 1.5531 | 1.0722 | 0.5711 | 1.0050 | 0.2094 |
| CREB3      | 1.1422 | 1.0779 | 0.9675 | 0.8324 | 1.0050 | 0.0679 |
| C11orf9    | 0.9361 | 1.2155 | 1.0575 | 0.8110 | 1.0050 | 0.0863 |
| SYN1       | 0.9714 | 1.1192 | 1.0248 | 0.9047 | 1.0050 | 0.0453 |
| CLEC12A    | 0.9708 | 1.0800 | 1.0662 | 0.9031 | 1.0050 | 0.0418 |
| LOC282992  | 0.9758 | 1.0504 | 1.1331 | 0.8608 | 1.0050 | 0.0578 |
| LOC728056  | 0.8442 | 1.1628 | 1.0531 | 0.9600 | 1.0050 | 0.0677 |
| RASD2      | 0.9414 | 1.1127 | 0.9728 | 0.9932 | 1.0050 | 0.0374 |
| DISP2      | 0.9617 | 1.1817 | 1.0033 | 0.8735 | 1.0050 | 0.0648 |
| CHD1L      | 0.9995 | 1.2174 | 1.1849 | 0.6184 | 1.0050 | 0.1375 |
| NKX2-3     | 0.9626 | 1.1077 | 1.0759 | 0.8739 | 1.0050 | 0.0537 |
| LOC650580  | 0.9523 | 1.0218 | 1.0342 | 1.0120 | 1.0051 | 0.0182 |
| TBC1D3I    | 0.9991 | 1.0195 | 0.9969 | 1.0048 | 1.0051 | 0.0051 |
| ADAMTSL5   | 0.9739 | 1.1282 | 0.9748 | 0.9434 | 1.0051 | 0.0417 |
| C6         | 0.9811 | 0.9907 | 1.0753 | 0.9732 | 1.0051 | 0.0237 |
| LOC648628  | 0.9372 | 1.1825 | 1.0005 | 0.9001 | 1.0051 | 0.0627 |
| LOC1001324 | 0.9929 | 1.1187 | 1.0414 | 0.8672 | 1.0051 | 0.0527 |
| LOC643274  | 1.0508 | 1.0935 | 0.9521 | 0.9239 | 1.0051 | 0.0401 |
| XPNPEP2    | 1.0703 | 1.1320 | 0.9522 | 0.8658 | 1.0051 | 0.0595 |
| CYHR1      | 1.0383 | 1.3121 | 0.8771 | 0.7928 | 1.0051 | 0.1143 |

|             |        |        |        |        |        |        |
|-------------|--------|--------|--------|--------|--------|--------|
| LOC647309   | 0.9260 | 1.0939 | 1.0735 | 0.9269 | 1.0051 | 0.0456 |
| LOC613037   | 0.8331 | 1.6993 | 0.7652 | 0.7227 | 1.0051 | 0.2325 |
| TRIM50      | 0.9762 | 1.1021 | 1.0738 | 0.8682 | 1.0051 | 0.0530 |
| STX1B       | 0.9032 | 0.9981 | 1.0917 | 1.0274 | 1.0051 | 0.0392 |
| DKFZP779L18 | 0.9420 | 1.0184 | 1.1040 | 0.9562 | 1.0051 | 0.0369 |
| LOC729724   | 1.0543 | 0.9968 | 0.9936 | 0.9757 | 1.0051 | 0.0170 |
| LOC730401   | 0.9616 | 1.0433 | 1.1002 | 0.9154 | 1.0051 | 0.0413 |
| CCDC153     | 0.9205 | 1.0412 | 1.0759 | 0.9829 | 1.0051 | 0.0341 |
| LOC649238   | 0.8843 | 1.1355 | 1.0664 | 0.9343 | 1.0051 | 0.0580 |
| LOC644946   | 0.9600 | 1.0619 | 0.9949 | 1.0037 | 1.0051 | 0.0212 |
| LOC649546   | 0.9326 | 1.0402 | 1.1145 | 0.9332 | 1.0051 | 0.0444 |
| LOC1001342  | 0.9763 | 1.0522 | 1.0483 | 0.9439 | 1.0051 | 0.0269 |
| KIAA1922    | 0.8123 | 1.1523 | 1.0680 | 0.9880 | 1.0051 | 0.0725 |
| LOC652796   | 0.9632 | 1.0713 | 1.0927 | 0.8934 | 1.0052 | 0.0468 |
| LOC1001299  | 1.0070 | 1.0737 | 1.0524 | 0.8875 | 1.0052 | 0.0416 |
| C19orf62    | 0.8165 | 1.4620 | 0.9674 | 0.7748 | 1.0052 | 0.1578 |
| LOC644336   | 0.9006 | 1.0428 | 1.1415 | 0.9358 | 1.0052 | 0.0546 |
| NPFFR2      | 0.9261 | 1.1289 | 1.0034 | 0.9623 | 1.0052 | 0.0442 |
| CCK         | 1.0173 | 1.1443 | 1.0159 | 0.8432 | 1.0052 | 0.0618 |
| LOC1001344  | 0.9625 | 1.1503 | 0.9949 | 0.9130 | 1.0052 | 0.0512 |
| CA2         | 0.9401 | 1.1212 | 1.0084 | 0.9511 | 1.0052 | 0.0415 |
| PRDM6       | 0.9346 | 0.9423 | 1.1794 | 0.9645 | 1.0052 | 0.0584 |
| LOC1001298  | 1.0212 | 1.0913 | 1.0397 | 0.8686 | 1.0052 | 0.0479 |
| DRD2        | 0.9817 | 1.1035 | 0.9693 | 0.9664 | 1.0052 | 0.0329 |
| LOC1001331  | 0.9891 | 1.2326 | 0.9057 | 0.8934 | 1.0052 | 0.0787 |
| ERCC-00142  | 1.0027 | 1.0543 | 1.0290 | 0.9349 | 1.0052 | 0.0257 |
| TNFRSF8     | 0.9507 | 1.1290 | 1.0630 | 0.8782 | 1.0052 | 0.0561 |
| FLJ14816    | 0.9983 | 1.0104 | 1.0519 | 0.9603 | 1.0052 | 0.0189 |
| FAM55A      | 0.9372 | 1.0659 | 0.9949 | 1.0229 | 1.0052 | 0.0270 |
| LOC391427   | 0.9827 | 1.0798 | 1.0151 | 0.9434 | 1.0052 | 0.0288 |
| LOC647648   | 1.0178 | 1.0634 | 1.0196 | 0.9202 | 1.0052 | 0.0303 |
| POU6F2      | 0.9289 | 1.0530 | 1.0903 | 0.9487 | 1.0052 | 0.0393 |
| RPS26P11    | 0.8668 | 1.3719 | 1.0803 | 0.7020 | 1.0052 | 0.1447 |
| C1orf220    | 0.9408 | 1.0389 | 1.0849 | 0.9565 | 1.0053 | 0.0342 |
| DEFB103B    | 0.9845 | 1.1606 | 1.0508 | 0.8251 | 1.0053 | 0.0702 |
| LOC647546   | 1.0279 | 0.9906 | 1.0603 | 0.9422 | 1.0053 | 0.0254 |
| LOC642751   | 0.8625 | 1.1274 | 1.2445 | 0.7867 | 1.0053 | 0.1081 |
| DNCL2A      | 0.9307 | 1.1676 | 0.9876 | 0.9352 | 1.0053 | 0.0556 |
| LOC391670   | 0.9472 | 1.1168 | 0.9843 | 0.9726 | 1.0053 | 0.0380 |
| RRH         | 1.0637 | 1.0712 | 0.9601 | 0.9261 | 1.0053 | 0.0366 |
| CEACAM3     | 1.0650 | 1.0708 | 0.9485 | 0.9368 | 1.0053 | 0.0362 |
| PDZRN4      | 0.9664 | 1.1045 | 1.0550 | 0.8952 | 1.0053 | 0.0465 |
| VMAC        | 0.9592 | 1.1970 | 0.9471 | 0.9179 | 1.0053 | 0.0645 |
| BBOX1       | 0.9391 | 1.2010 | 1.0214 | 0.8598 | 1.0053 | 0.0731 |
| LOC439950   | 0.7720 | 1.3082 | 0.9967 | 0.9443 | 1.0053 | 0.1118 |
| LOC646401   | 0.9507 | 1.0961 | 1.1014 | 0.8731 | 1.0053 | 0.0562 |

|            |        |        |        |        |        |        |
|------------|--------|--------|--------|--------|--------|--------|
| LOC647031  | 0.9608 | 1.0836 | 1.0775 | 0.8994 | 1.0053 | 0.0452 |
| PCDH17     | 0.8980 | 1.2255 | 1.0632 | 0.8345 | 1.0053 | 0.0878 |
| C9orf84    | 0.9628 | 1.0723 | 1.0526 | 0.9336 | 1.0053 | 0.0337 |
| COX6BP1    | 0.9262 | 1.0842 | 1.1202 | 0.8907 | 1.0053 | 0.0569 |
| LOC652798  | 1.0166 | 1.1624 | 1.0436 | 0.7987 | 1.0053 | 0.0758 |
| DDX60      | 1.0731 | 1.1620 | 0.9599 | 0.8264 | 1.0053 | 0.0726 |
| LOC652147  | 1.0210 | 1.0548 | 1.1503 | 0.7953 | 1.0053 | 0.0752 |
| LOC1001340 | 0.9034 | 1.0786 | 1.0466 | 0.9928 | 1.0053 | 0.0383 |
| LOC389217  | 1.0815 | 0.9753 | 0.9881 | 0.9765 | 1.0054 | 0.0255 |
| LOC730479  | 0.9203 | 1.0664 | 1.1420 | 0.8928 | 1.0054 | 0.0594 |
| LOC1001299 | 1.0234 | 1.0768 | 1.0091 | 0.9123 | 1.0054 | 0.0343 |
| RAG2       | 0.9596 | 1.0098 | 1.0576 | 0.9945 | 1.0054 | 0.0203 |
| BAZ2A      | 0.9047 | 1.2298 | 0.9377 | 0.9495 | 1.0054 | 0.0754 |
| FCN2       | 1.0115 | 1.0226 | 0.9676 | 1.0200 | 1.0054 | 0.0128 |
| LOC729034  | 1.0505 | 1.1218 | 1.0428 | 0.8065 | 1.0054 | 0.0686 |
| CENPC1     | 0.9206 | 1.1135 | 1.0471 | 0.9405 | 1.0054 | 0.0455 |
| MIR542     | 0.9128 | 1.1974 | 0.9800 | 0.9314 | 1.0054 | 0.0655 |
| FAM83B     | 0.9220 | 1.0639 | 1.0990 | 0.9369 | 1.0054 | 0.0446 |
| LOC646888  | 1.0628 | 1.0615 | 1.0198 | 0.8777 | 1.0054 | 0.0437 |
| KCNS2      | 1.0086 | 1.0653 | 0.9507 | 0.9972 | 1.0055 | 0.0235 |
| ENPP7      | 0.9123 | 1.1274 | 1.0034 | 0.9786 | 1.0055 | 0.0450 |
| TRPV3      | 0.9660 | 1.0436 | 1.1043 | 0.9079 | 1.0055 | 0.0431 |
| NOBOX      | 0.9653 | 1.0161 | 1.0471 | 0.9934 | 1.0055 | 0.0174 |
| LOC646130  | 1.0252 | 1.0743 | 1.0224 | 0.9000 | 1.0055 | 0.0371 |
| SNHG6      | 0.8153 | 1.2746 | 1.1299 | 0.8021 | 1.0055 | 0.1174 |
| EGR3       | 0.9611 | 1.1286 | 1.0088 | 0.9235 | 1.0055 | 0.0446 |
| DUS1L      | 1.0397 | 1.2064 | 0.9977 | 0.7782 | 1.0055 | 0.0882 |
| PEG3AS     | 0.9008 | 0.9809 | 1.2798 | 0.8605 | 1.0055 | 0.0948 |
| MIR611     | 0.8622 | 1.1570 | 0.9437 | 1.0590 | 1.0055 | 0.0647 |
| PIK3R6     | 0.9012 | 1.1902 | 1.0042 | 0.9265 | 1.0055 | 0.0653 |
| LOC646719  | 1.0147 | 1.1143 | 0.9744 | 0.9186 | 1.0055 | 0.0413 |
| LOC648795  | 1.0720 | 1.0539 | 1.0263 | 0.8699 | 1.0055 | 0.0462 |
| SIRPG      | 0.9153 | 1.1107 | 1.0638 | 0.9324 | 1.0055 | 0.0483 |
| LOC645494  | 0.8763 | 1.1732 | 1.0445 | 0.9282 | 1.0055 | 0.0660 |
| TMEM81     | 0.9106 | 1.1726 | 1.0299 | 0.9091 | 1.0055 | 0.0625 |
| LOC283999  | 0.8551 | 1.1014 | 1.1443 | 0.9213 | 1.0055 | 0.0696 |
| PIRT       | 0.9549 | 1.0480 | 1.0651 | 0.9542 | 1.0055 | 0.0297 |
| CD79B      | 0.9544 | 1.1256 | 1.0147 | 0.9275 | 1.0056 | 0.0440 |
| GPR26      | 0.9626 | 1.1031 | 1.0514 | 0.9051 | 1.0056 | 0.0443 |
| MIR450A1   | 0.9795 | 1.2199 | 0.8519 | 0.9709 | 1.0056 | 0.0772 |
| HORMAD2    | 0.8898 | 1.2050 | 1.0450 | 0.8826 | 1.0056 | 0.0763 |
| TTC28      | 0.9547 | 1.0695 | 1.0748 | 0.9233 | 1.0056 | 0.0390 |
| LOC1001303 | 0.9022 | 1.2047 | 1.0847 | 0.8307 | 1.0056 | 0.0852 |
| RGS13      | 0.9119 | 1.1099 | 1.0960 | 0.9046 | 1.0056 | 0.0563 |
| OR2C1      | 1.0459 | 0.9430 | 1.0940 | 0.9395 | 1.0056 | 0.0384 |
| LOC374491  | 0.9079 | 1.1473 | 1.0153 | 0.9519 | 1.0056 | 0.0521 |



|            |        |        |        |        |        |        |
|------------|--------|--------|--------|--------|--------|--------|
| LOC653620  | 1.0841 | 1.0348 | 0.9590 | 0.9445 | 1.0056 | 0.0328 |
| IFIT1L     | 0.9725 | 1.0559 | 1.0276 | 0.9665 | 1.0056 | 0.0217 |
| HIF3A      | 0.9394 | 1.1079 | 1.0489 | 0.9262 | 1.0056 | 0.0438 |
| VSTM1      | 1.0417 | 1.0623 | 0.9374 | 0.9809 | 1.0056 | 0.0285 |
| PEX14      | 0.9794 | 1.2766 | 0.9248 | 0.8417 | 1.0056 | 0.0947 |
| PKIA       | 0.9288 | 1.0653 | 1.0568 | 0.9714 | 1.0056 | 0.0332 |
| LOC338588  | 0.9835 | 1.1182 | 1.1001 | 0.8206 | 1.0056 | 0.0685 |
| LOC286528  | 0.9654 | 1.1701 | 1.0923 | 0.7946 | 1.0056 | 0.0820 |
| FNDC7      | 0.9130 | 1.1737 | 0.9852 | 0.9506 | 1.0056 | 0.0579 |
| LOC729526  | 0.9392 | 1.0512 | 1.0589 | 0.9732 | 1.0056 | 0.0294 |
| LOC641848  | 0.8640 | 1.0985 | 1.3069 | 0.7530 | 1.0056 | 0.1236 |
| LOC1001334 | 1.0879 | 1.1169 | 0.9617 | 0.8560 | 1.0056 | 0.0602 |
| TMEM16D    | 1.0344 | 1.0534 | 1.1222 | 0.8126 | 1.0056 | 0.0671 |
| LOC1001329 | 0.9655 | 1.0761 | 1.0704 | 0.9105 | 1.0056 | 0.0407 |
| HLXB9      | 0.9690 | 1.1389 | 0.8961 | 1.0186 | 1.0056 | 0.0510 |
| NTNG1      | 0.9872 | 1.0643 | 1.0480 | 0.9232 | 1.0057 | 0.0321 |
| LOC644637  | 0.9275 | 1.1788 | 0.9033 | 1.0130 | 1.0057 | 0.0623 |
| LOC642212  | 0.9180 | 1.2195 | 1.0024 | 0.8829 | 1.0057 | 0.0755 |
| LOC652553  | 1.0107 | 0.9927 | 1.1078 | 0.9115 | 1.0057 | 0.0403 |
| KRT5       | 0.9268 | 1.1562 | 1.0495 | 0.8903 | 1.0057 | 0.0606 |
| LOC653867  | 0.9151 | 1.1879 | 0.9678 | 0.9520 | 1.0057 | 0.0617 |
| FLJ35801   | 0.8208 | 1.4475 | 1.0111 | 0.7433 | 1.0057 | 0.1577 |
| LOC440934  | 0.9950 | 1.0848 | 1.0493 | 0.8937 | 1.0057 | 0.0416 |
| PITX3      | 0.8203 | 1.1174 | 1.0767 | 1.0084 | 1.0057 | 0.0658 |
| NLRP10     | 0.9550 | 1.0945 | 1.0468 | 0.9265 | 1.0057 | 0.0392 |
| LOC730236  | 0.9136 | 1.1306 | 1.0204 | 0.9582 | 1.0057 | 0.0470 |
| VSTM2A     | 0.9951 | 1.1281 | 1.0857 | 0.8140 | 1.0057 | 0.0697 |
| LOC1001317 | 0.9617 | 1.1051 | 1.0236 | 0.9326 | 1.0057 | 0.0382 |
| FAM70B     | 0.9444 | 1.1370 | 1.0004 | 0.9411 | 1.0057 | 0.0458 |
| LOC441114  | 0.9049 | 1.0519 | 1.1289 | 0.9372 | 1.0057 | 0.0518 |
| C4B        | 0.9478 | 1.0618 | 1.1181 | 0.8952 | 1.0058 | 0.0511 |
| PNPLA3     | 0.8922 | 1.0844 | 1.0923 | 0.9541 | 1.0058 | 0.0493 |
| LOC641931  | 0.8491 | 1.3133 | 0.9230 | 0.9377 | 1.0058 | 0.1043 |
| LOC339809  | 0.9648 | 1.1054 | 1.0123 | 0.9406 | 1.0058 | 0.0364 |
| FLJ23172   | 0.9702 | 1.0826 | 1.0474 | 0.9229 | 1.0058 | 0.0362 |
| LOC645201  | 0.9144 | 1.1710 | 0.9990 | 0.9388 | 1.0058 | 0.0579 |
| ENOX2      | 1.0021 | 1.1166 | 0.9892 | 0.9152 | 1.0058 | 0.0416 |
| LOC1001319 | 0.8730 | 1.0884 | 1.0694 | 0.9925 | 1.0058 | 0.0489 |
| LOC1001328 | 0.9553 | 1.1151 | 1.0323 | 0.9205 | 1.0058 | 0.0433 |
| KLHDC8A    | 0.9348 | 1.1795 | 0.9306 | 0.9785 | 1.0058 | 0.0589 |
| ATP13A4    | 0.9903 | 1.1342 | 0.9628 | 0.9359 | 1.0058 | 0.0442 |
| LOC643965  | 0.9473 | 1.0522 | 1.0852 | 0.9385 | 1.0058 | 0.0370 |
| TCAP       | 0.9234 | 1.0628 | 1.0861 | 0.9510 | 1.0058 | 0.0403 |
| MYH14      | 0.8678 | 1.1982 | 1.1103 | 0.8471 | 1.0058 | 0.0876 |
| LOC441208  | 1.0138 | 1.1123 | 0.9662 | 0.9310 | 1.0058 | 0.0393 |
| PRAMEF13   | 1.0057 | 1.1036 | 0.9924 | 0.9216 | 1.0058 | 0.0375 |

|            |        |        |        |        |        |        |
|------------|--------|--------|--------|--------|--------|--------|
| LOC1001328 | 0.8408 | 1.0821 | 1.1797 | 0.9206 | 1.0058 | 0.0767 |
| LOC1001285 | 0.9366 | 1.0910 | 1.0724 | 0.9234 | 1.0058 | 0.0440 |
| CRISP1     | 1.0082 | 1.0649 | 1.0081 | 0.9421 | 1.0058 | 0.0251 |
| CHD6       | 0.8225 | 1.3639 | 1.0202 | 0.8167 | 1.0058 | 0.1284 |
| LOC730313  | 0.7349 | 1.1471 | 1.3232 | 0.8181 | 1.0058 | 0.1382 |
| IL27       | 0.9875 | 1.0424 | 1.0049 | 0.9885 | 1.0059 | 0.0128 |
| MAP1LC3C   | 1.0263 | 1.2384 | 0.8873 | 0.8714 | 1.0059 | 0.0850 |
| LOC649305  | 0.8604 | 1.0915 | 1.0206 | 1.0510 | 1.0059 | 0.0506 |
| SUDS3      | 0.9355 | 1.1735 | 0.9950 | 0.9194 | 1.0059 | 0.0582 |
| LYZL2      | 0.9093 | 1.0984 | 1.0653 | 0.9504 | 1.0059 | 0.0452 |
| CYP4A22    | 1.0214 | 1.0280 | 1.0636 | 0.9104 | 1.0059 | 0.0331 |
| MGC52282   | 1.0350 | 1.0657 | 1.0456 | 0.8771 | 1.0059 | 0.0434 |
| HIPK4      | 0.9590 | 1.0732 | 1.0148 | 0.9765 | 1.0059 | 0.0253 |
| DRP2       | 0.9794 | 0.9926 | 1.0917 | 0.9599 | 1.0059 | 0.0294 |
| FGD2       | 0.9207 | 1.1231 | 1.0860 | 0.8938 | 1.0059 | 0.0577 |
| PDYN       | 0.9417 | 1.2154 | 1.0500 | 0.8165 | 1.0059 | 0.0846 |
| SNORA60    | 0.9423 | 1.0509 | 1.1319 | 0.8985 | 1.0059 | 0.0528 |
| LOC1001303 | 1.0002 | 1.0562 | 1.0202 | 0.9471 | 1.0059 | 0.0228 |
| SLC25A43   | 1.0050 | 1.0738 | 1.0257 | 0.9192 | 1.0059 | 0.0323 |
| LOC255025  | 0.9093 | 1.2085 | 0.8919 | 1.0141 | 1.0059 | 0.0727 |
| SMURF1     | 0.9251 | 1.2144 | 0.9784 | 0.9059 | 1.0059 | 0.0712 |
| GIGYF1     | 1.0070 | 1.1440 | 1.0170 | 0.8557 | 1.0059 | 0.0590 |
| KCNN1      | 0.9862 | 1.0611 | 0.9684 | 1.0080 | 1.0059 | 0.0201 |
| CCDC29     | 1.1159 | 1.0837 | 0.9474 | 0.8767 | 1.0059 | 0.0565 |
| LOC732429  | 0.9457 | 1.0842 | 1.0295 | 0.9643 | 1.0059 | 0.0317 |
| SCUBE3     | 0.9596 | 1.1343 | 1.0181 | 0.9118 | 1.0059 | 0.0480 |
| LOC644580  | 0.7922 | 1.0735 | 1.0838 | 1.0743 | 1.0060 | 0.0713 |
| DEFB114    | 0.9670 | 1.0904 | 1.0613 | 0.9051 | 1.0060 | 0.0427 |
| ATP6V1H    | 0.8778 | 1.3484 | 1.0597 | 0.7380 | 1.0060 | 0.1318 |
| SLC6A7     | 0.9498 | 1.1224 | 1.0045 | 0.9472 | 1.0060 | 0.0410 |
| LOC644384  | 0.9148 | 1.0641 | 1.0685 | 0.9765 | 1.0060 | 0.0370 |
| LOC340508  | 0.9452 | 1.0877 | 0.9961 | 0.9948 | 1.0060 | 0.0297 |
| KRT6A      | 0.9929 | 1.1033 | 1.0110 | 0.9167 | 1.0060 | 0.0383 |
| S1PR2      | 0.9668 | 1.0332 | 1.0247 | 0.9991 | 1.0060 | 0.0149 |
| KCNMB4     | 0.9711 | 1.1388 | 0.9932 | 0.9208 | 1.0060 | 0.0468 |
| LOC652602  | 1.0966 | 1.0940 | 0.9980 | 0.8352 | 1.0060 | 0.0614 |
| LOC284964  | 0.9629 | 1.1036 | 1.0669 | 0.8905 | 1.0060 | 0.0487 |
| CCNA1      | 0.9274 | 1.2011 | 0.9553 | 0.9402 | 1.0060 | 0.0653 |
| LOC644753  | 1.0565 | 1.0367 | 1.0157 | 0.9151 | 1.0060 | 0.0314 |
| LOC1001315 | 0.9216 | 1.0968 | 1.0203 | 0.9853 | 1.0060 | 0.0365 |
| YBX2       | 0.9679 | 1.0442 | 1.0302 | 0.9817 | 1.0060 | 0.0184 |
| ITFG2      | 0.9036 | 1.3074 | 1.0835 | 0.7296 | 1.0060 | 0.1237 |
| CHSY3      | 1.0099 | 1.1472 | 0.9798 | 0.8873 | 1.0060 | 0.0538 |
| AMELY      | 0.8942 | 1.1570 | 1.0590 | 0.9139 | 1.0060 | 0.0623 |
| LOC642131  | 1.0146 | 1.0213 | 1.0505 | 0.9378 | 1.0060 | 0.0240 |
| FLJ33706   | 1.0714 | 1.0521 | 0.9888 | 0.9120 | 1.0060 | 0.0360 |

|            |        |        |        |        |        |        |
|------------|--------|--------|--------|--------|--------|--------|
| CLEC17A    | 0.8879 | 1.1633 | 1.0222 | 0.9508 | 1.0061 | 0.0592 |
| LOC642701  | 1.0323 | 1.0993 | 0.9078 | 0.9848 | 1.0061 | 0.0403 |
| LOC1001282 | 1.1148 | 1.0989 | 0.9839 | 0.8266 | 1.0061 | 0.0666 |
| EMP2       | 1.0427 | 1.1330 | 0.9606 | 0.8879 | 1.0061 | 0.0528 |
| C13orf36   | 1.0046 | 1.0305 | 1.0895 | 0.8996 | 1.0061 | 0.0397 |
| LOC440092  | 1.0229 | 1.1054 | 1.0532 | 0.8428 | 1.0061 | 0.0570 |
| LOC641365  | 1.0058 | 1.0903 | 1.0298 | 0.8984 | 1.0061 | 0.0400 |
| IGDCC4     | 0.9775 | 1.0848 | 0.9910 | 0.9710 | 1.0061 | 0.0266 |
| C18orf58   | 0.9925 | 1.1745 | 1.0578 | 0.7996 | 1.0061 | 0.0784 |
| LOC642196  | 0.8950 | 1.0873 | 1.0947 | 0.9473 | 1.0061 | 0.0502 |
| CDH3       | 0.9574 | 1.1437 | 0.9768 | 0.9465 | 1.0061 | 0.0463 |
| LOC1001320 | 1.0470 | 1.1035 | 1.0560 | 0.8180 | 1.0061 | 0.0639 |
| CCDC57     | 0.9197 | 1.1404 | 1.0713 | 0.8930 | 1.0061 | 0.0595 |
| ERCC-00156 | 1.0244 | 1.0658 | 1.0198 | 0.9144 | 1.0061 | 0.0323 |
| LOC643161  | 0.9303 | 1.0900 | 1.0784 | 0.9258 | 1.0061 | 0.0452 |
| SNORD9     | 0.9746 | 1.2192 | 0.9538 | 0.8768 | 1.0061 | 0.0741 |
| CARD8      | 1.0045 | 1.1641 | 0.9930 | 0.8628 | 1.0061 | 0.0617 |
| TCEB3C     | 1.0715 | 1.0541 | 0.9403 | 0.9586 | 1.0061 | 0.0331 |
| LOC1001287 | 1.0074 | 1.0933 | 1.0469 | 0.8769 | 1.0061 | 0.0465 |
| FASLG      | 1.0283 | 0.9594 | 1.0050 | 1.0319 | 1.0061 | 0.0167 |
| C22orf42   | 0.9957 | 1.0472 | 1.0257 | 0.9559 | 1.0061 | 0.0198 |
| OR8S1      | 0.9832 | 1.0775 | 1.0165 | 0.9474 | 1.0061 | 0.0277 |
| LOC649703  | 0.9546 | 1.0642 | 1.0603 | 0.9453 | 1.0061 | 0.0325 |
| LOC1001279 | 0.8548 | 1.1307 | 1.0480 | 0.9910 | 1.0061 | 0.0580 |
| LOC649945  | 1.0024 | 1.0247 | 1.0436 | 0.9539 | 1.0061 | 0.0194 |
| PLEKHH1    | 0.9954 | 1.3484 | 0.8976 | 0.7832 | 1.0061 | 0.1221 |
| SPINK5L2   | 0.8959 | 1.0556 | 1.1345 | 0.9387 | 1.0062 | 0.0545 |
| CCAR1      | 0.9274 | 1.1048 | 1.1146 | 0.8780 | 1.0062 | 0.0606 |
| LOC644072  | 0.9447 | 1.0653 | 1.1041 | 0.9105 | 1.0062 | 0.0466 |
| NTN4       | 0.9794 | 1.0708 | 1.0272 | 0.9474 | 1.0062 | 0.0271 |
| LOC1001322 | 0.9491 | 1.0467 | 1.0201 | 1.0089 | 1.0062 | 0.0206 |
| LHX9       | 0.9787 | 1.0772 | 1.0348 | 0.9341 | 1.0062 | 0.0314 |
| C1QTNF9    | 0.9470 | 1.1679 | 1.0149 | 0.8950 | 1.0062 | 0.0592 |
| NVL        | 0.9245 | 1.5422 | 0.9700 | 0.5882 | 1.0062 | 0.1979 |
| LOC730288  | 0.7954 | 1.2416 | 1.1863 | 0.8016 | 1.0062 | 0.1205 |
| LOC653188  | 1.0460 | 0.9773 | 1.0808 | 0.9207 | 1.0062 | 0.0357 |
| LOC646033  | 0.9762 | 0.9884 | 1.0263 | 1.0341 | 1.0062 | 0.0141 |
| BMS1P5     | 0.6914 | 1.3108 | 1.2387 | 0.7840 | 1.0062 | 0.1569 |
| FOLR3      | 0.9634 | 1.0275 | 0.9715 | 1.0625 | 1.0062 | 0.0235 |
| LOC730286  | 1.0245 | 1.1372 | 0.9460 | 0.9172 | 1.0062 | 0.0492 |
| LOC642976  | 1.0229 | 1.0561 | 1.0031 | 0.9429 | 1.0062 | 0.0238 |
| DACT1      | 0.9630 | 1.1161 | 1.0073 | 0.9386 | 1.0062 | 0.0393 |
| LOC728208  | 0.9132 | 1.1539 | 1.0662 | 0.8916 | 1.0062 | 0.0627 |
| LOC401237  | 0.8028 | 1.1745 | 1.0162 | 1.0315 | 1.0062 | 0.0766 |
| IBSP       | 0.7787 | 1.3052 | 1.0356 | 0.9055 | 1.0062 | 0.1126 |
| TRIOBP     | 0.8905 | 1.2636 | 1.0455 | 0.8254 | 1.0062 | 0.0974 |

|            |        |        |        |        |        |        |
|------------|--------|--------|--------|--------|--------|--------|
| LOC652305  | 0.9981 | 1.1098 | 1.0499 | 0.8672 | 1.0062 | 0.0517 |
| SLC13A3    | 0.9388 | 1.1671 | 1.0368 | 0.8823 | 1.0063 | 0.0624 |
| RNASEL     | 0.9975 | 1.2359 | 1.0370 | 0.7546 | 1.0063 | 0.0988 |
| LOC648329  | 0.8796 | 1.0632 | 1.1107 | 0.9716 | 1.0063 | 0.0511 |
| LOC650804  | 0.9880 | 1.0528 | 1.0377 | 0.9466 | 1.0063 | 0.0242 |
| TOP1P1     | 0.9679 | 1.0950 | 1.0492 | 0.9129 | 1.0063 | 0.0407 |
| ZNF578     | 1.0702 | 1.0159 | 1.0318 | 0.9072 | 1.0063 | 0.0349 |
| LOC613206  | 1.0344 | 1.2131 | 0.9095 | 0.8682 | 1.0063 | 0.0775 |
| CA4        | 0.9218 | 1.1063 | 1.0737 | 0.9233 | 1.0063 | 0.0488 |
| MCART6     | 0.9384 | 1.0793 | 1.1283 | 0.8791 | 1.0063 | 0.0585 |
| AFAP1      | 0.9496 | 1.1481 | 1.0254 | 0.9021 | 1.0063 | 0.0537 |
| LOC647624  | 0.9329 | 1.2026 | 1.0436 | 0.8461 | 1.0063 | 0.0769 |
| ARMC3      | 0.9847 | 1.0110 | 1.0760 | 0.9537 | 1.0063 | 0.0260 |
| ADCK5      | 0.8931 | 1.2346 | 0.9824 | 0.9153 | 1.0063 | 0.0784 |
| MIR509-3   | 0.9477 | 1.1113 | 0.9940 | 0.9725 | 1.0063 | 0.0362 |
| ZNF763     | 0.9626 | 1.2315 | 1.0362 | 0.7951 | 1.0064 | 0.0904 |
| MAP4K3     | 0.7815 | 1.5068 | 0.9261 | 0.8111 | 1.0064 | 0.1697 |
| LOC442245  | 0.9436 | 1.1640 | 0.9864 | 0.9314 | 1.0064 | 0.0539 |
| MAD1L1     | 1.0236 | 1.1682 | 0.9331 | 0.9005 | 1.0064 | 0.0599 |
| DPEP2      | 0.9166 | 1.1476 | 1.0018 | 0.9595 | 1.0064 | 0.0502 |
| LOC647500  | 0.9728 | 1.0712 | 1.0147 | 0.9668 | 1.0064 | 0.0241 |
| LOC401911  | 0.9585 | 1.1261 | 1.0228 | 0.9181 | 1.0064 | 0.0454 |
| WDR93      | 0.9756 | 1.0924 | 1.0507 | 0.9068 | 1.0064 | 0.0411 |
| LOC1001312 | 1.0018 | 1.1138 | 0.9558 | 0.9541 | 1.0064 | 0.0375 |
| LOC1001297 | 0.9914 | 1.1433 | 0.9022 | 0.9887 | 1.0064 | 0.0501 |
| LOC1001322 | 0.9275 | 1.1573 | 1.0466 | 0.8942 | 1.0064 | 0.0600 |
| LOC390531  | 0.9620 | 1.0961 | 1.0704 | 0.8972 | 1.0064 | 0.0466 |
| GPX1       | 0.9021 | 1.3715 | 1.0784 | 0.6738 | 1.0064 | 0.1472 |
| LOC387930  | 0.8665 | 1.1630 | 1.1103 | 0.8859 | 1.0064 | 0.0761 |
| ACCN3      | 0.8980 | 1.0651 | 1.0880 | 0.9746 | 1.0064 | 0.0437 |
| SLC5A7     | 0.9719 | 1.1005 | 0.9687 | 0.9847 | 1.0064 | 0.0315 |
| KIAA0232   | 1.0139 | 1.1924 | 0.9207 | 0.8987 | 1.0064 | 0.0668 |
| LOC1001302 | 0.9345 | 1.1275 | 1.0968 | 0.8670 | 1.0064 | 0.0629 |
| NXNL1      | 0.9404 | 1.1408 | 1.0293 | 0.9154 | 1.0065 | 0.0510 |
| FLJ40672   | 0.8681 | 1.0711 | 1.1374 | 0.9493 | 1.0065 | 0.0604 |
| HTRA4      | 0.9360 | 1.1411 | 0.9943 | 0.9544 | 1.0065 | 0.0465 |
| TAS2R50    | 0.9727 | 1.0493 | 0.9903 | 1.0136 | 1.0065 | 0.0165 |
| C1orf190   | 0.8896 | 1.0277 | 1.1040 | 1.0046 | 1.0065 | 0.0444 |
| LOC643426  | 0.9966 | 1.0102 | 1.0604 | 0.9587 | 1.0065 | 0.0210 |
| OR10A4     | 0.9679 | 1.0917 | 1.0210 | 0.9455 | 1.0065 | 0.0325 |
| LOC1001311 | 1.0297 | 1.1080 | 1.0335 | 0.8548 | 1.0065 | 0.0537 |
| CEACAM6    | 1.0500 | 0.9960 | 1.1240 | 0.8561 | 1.0065 | 0.0566 |
| MIR1231    | 0.9689 | 1.0231 | 1.2015 | 0.8325 | 1.0065 | 0.0764 |
| FLJ23152   | 0.9473 | 1.1346 | 0.9814 | 0.9627 | 1.0065 | 0.0433 |
| LOC1001923 | 0.9506 | 1.1364 | 1.0485 | 0.8905 | 1.0065 | 0.0542 |
| STX17      | 0.9484 | 1.2265 | 1.0562 | 0.7949 | 1.0065 | 0.0909 |

|            |        |        |        |        |        |        |
|------------|--------|--------|--------|--------|--------|--------|
| LOC1001346 | 0.9537 | 1.0398 | 1.0280 | 1.0046 | 1.0065 | 0.0191 |
| PLCG1      | 1.0379 | 1.2632 | 0.9793 | 0.7457 | 1.0065 | 0.1063 |
| LOC652783  | 1.0289 | 1.0145 | 1.1092 | 0.8734 | 1.0065 | 0.0490 |
| LOC1001322 | 0.9160 | 1.1042 | 1.0686 | 0.9373 | 1.0065 | 0.0469 |
| EBI2       | 0.9638 | 1.1572 | 1.0334 | 0.8717 | 1.0065 | 0.0602 |
| MGC42638   | 0.8850 | 1.0718 | 1.0685 | 1.0008 | 1.0065 | 0.0437 |
| LOC1001295 | 0.8938 | 1.2246 | 0.9707 | 0.9370 | 1.0065 | 0.0744 |
| BSN        | 0.9456 | 1.1686 | 0.9766 | 0.9353 | 1.0065 | 0.0547 |
| NGB        | 0.9685 | 1.0555 | 1.0677 | 0.9345 | 1.0065 | 0.0326 |
| LOC127406  | 1.0077 | 1.1473 | 1.0007 | 0.8704 | 1.0065 | 0.0566 |
| CMKLR1     | 0.9811 | 1.0076 | 1.0967 | 0.9408 | 1.0065 | 0.0330 |
| ERCC-00112 | 1.0170 | 1.0849 | 1.0608 | 0.8635 | 1.0066 | 0.0497 |
| FKRP       | 0.9273 | 1.1544 | 1.1011 | 0.8434 | 1.0066 | 0.0729 |
| KHNYN      | 1.1522 | 1.2038 | 0.9154 | 0.7548 | 1.0066 | 0.1048 |
| LOC643493  | 0.9327 | 1.0681 | 1.0901 | 0.9354 | 1.0066 | 0.0421 |
| LOC642834  | 0.9431 | 1.0593 | 1.0823 | 0.9417 | 1.0066 | 0.0374 |
| HCG26      | 0.8578 | 1.2433 | 0.9874 | 0.9378 | 1.0066 | 0.0833 |
| KRTAP10-4  | 1.0304 | 1.0874 | 0.9581 | 0.9504 | 1.0066 | 0.0324 |
| CGB7       | 0.9630 | 1.1224 | 1.1149 | 0.8261 | 1.0066 | 0.0705 |
| VSIG6      | 0.8825 | 1.1801 | 0.9725 | 0.9913 | 1.0066 | 0.0625 |
| CD160      | 0.9362 | 1.0775 | 1.0948 | 0.9180 | 1.0066 | 0.0462 |
| LOC649264  | 0.9409 | 1.1397 | 1.0108 | 0.9350 | 1.0066 | 0.0476 |
| LOC645850  | 1.0893 | 1.0311 | 0.9470 | 0.9590 | 1.0066 | 0.0332 |
| C7orf34    | 0.9014 | 1.0887 | 1.1660 | 0.8703 | 1.0066 | 0.0718 |
| PTPRT      | 0.9237 | 1.0905 | 1.0332 | 0.9791 | 1.0066 | 0.0358 |
| ADAMTS7    | 1.0495 | 1.0980 | 1.0087 | 0.8704 | 1.0066 | 0.0489 |
| LOC1001341 | 0.9169 | 1.0708 | 1.0553 | 0.9834 | 1.0066 | 0.0354 |
| BCO2       | 0.9619 | 1.1474 | 1.0049 | 0.9122 | 1.0066 | 0.0506 |
| ERCC-00043 | 0.9524 | 1.0502 | 1.0438 | 0.9801 | 1.0066 | 0.0240 |
| SLC17A8    | 1.1017 | 1.0305 | 1.0144 | 0.8800 | 1.0066 | 0.0463 |
| QPRT       | 0.9694 | 1.0629 | 0.9678 | 1.0264 | 1.0066 | 0.0232 |
| MAEL       | 0.8877 | 1.1789 | 0.9907 | 0.9692 | 1.0066 | 0.0616 |
| MMP17      | 1.0072 | 1.0604 | 1.0313 | 0.9277 | 1.0066 | 0.0285 |
| SBNO2      | 0.9599 | 1.2977 | 0.9898 | 0.7792 | 1.0066 | 0.1076 |
| OR1B1      | 0.9717 | 1.1125 | 1.0481 | 0.8943 | 1.0067 | 0.0472 |
| LOC648623  | 0.9675 | 1.1537 | 1.0137 | 0.8917 | 1.0067 | 0.0551 |
| C11orf1    | 0.8518 | 1.3464 | 1.0803 | 0.7482 | 1.0067 | 0.1328 |
| LOC344875  | 0.8952 | 1.1672 | 1.0899 | 0.8744 | 1.0067 | 0.0722 |
| SLC38A4    | 0.9241 | 1.2099 | 1.0428 | 0.8498 | 1.0067 | 0.0785 |
| GALR3      | 0.9353 | 1.0807 | 1.0478 | 0.9629 | 1.0067 | 0.0344 |
| RBP3       | 1.0175 | 1.1239 | 0.9781 | 0.9072 | 1.0067 | 0.0452 |
| SLC22A1    | 0.8691 | 1.2210 | 1.0363 | 0.9003 | 1.0067 | 0.0801 |
| LOC653765  | 0.9960 | 1.0528 | 1.0328 | 0.9451 | 1.0067 | 0.0237 |
| POM121L4P  | 1.0516 | 1.1912 | 0.9739 | 0.8100 | 1.0067 | 0.0795 |
| FAM189A1   | 0.8640 | 1.2288 | 0.9659 | 0.9682 | 1.0067 | 0.0779 |
| BATF2      | 1.0240 | 1.0625 | 0.9929 | 0.9474 | 1.0067 | 0.0244 |

|            |        |        |        |        |        |        |
|------------|--------|--------|--------|--------|--------|--------|
| TRPM7      | 0.9166 | 1.1739 | 1.0311 | 0.9052 | 1.0067 | 0.0625 |
| LOC391142  | 0.9746 | 1.0950 | 1.0120 | 0.9452 | 1.0067 | 0.0325 |
| LOC650118  | 0.9759 | 1.0698 | 1.0767 | 0.9045 | 1.0067 | 0.0411 |
| LOC651597  | 1.0022 | 0.9857 | 1.0636 | 0.9754 | 1.0067 | 0.0197 |
| LOC388494  | 0.9799 | 1.0421 | 1.0383 | 0.9667 | 1.0067 | 0.0195 |
| CBLN2      | 0.9826 | 1.4836 | 0.8811 | 0.6797 | 1.0067 | 0.1710 |
| SLC13A2    | 1.1524 | 1.0404 | 0.9959 | 0.8383 | 1.0067 | 0.0651 |
| MAGEA9     | 0.9526 | 1.0220 | 1.1125 | 0.9399 | 1.0067 | 0.0396 |
| MIR148B    | 0.9883 | 1.0837 | 1.0478 | 0.9072 | 1.0067 | 0.0386 |
| LOC647806  | 1.0815 | 1.0614 | 1.0489 | 0.8352 | 1.0068 | 0.0576 |
| BASE       | 1.0565 | 1.0507 | 0.9973 | 0.9225 | 1.0068 | 0.0311 |
| IVNS1ABP   | 1.0045 | 1.1392 | 1.0459 | 0.8375 | 1.0068 | 0.0631 |
| LOC442480  | 0.9829 | 1.1154 | 0.9650 | 0.9639 | 1.0068 | 0.0365 |
| SLC19A3    | 0.9487 | 1.1457 | 1.0934 | 0.8393 | 1.0068 | 0.0697 |
| PTPN22     | 0.9512 | 1.0369 | 1.0945 | 0.9446 | 1.0068 | 0.0360 |
| BAG4       | 0.8682 | 1.3011 | 1.0685 | 0.7894 | 1.0068 | 0.1144 |
| C12orf74   | 0.9450 | 1.1371 | 1.0239 | 0.9213 | 1.0068 | 0.0487 |
| LOC641939  | 0.9349 | 1.1532 | 0.9193 | 1.0199 | 1.0068 | 0.0536 |
| C12orf64   | 0.9581 | 1.1611 | 0.9894 | 0.9187 | 1.0068 | 0.0534 |
| OR8B4      | 0.9606 | 0.9988 | 1.1010 | 0.9668 | 1.0068 | 0.0325 |
| SGK269     | 0.9725 | 1.0459 | 1.0806 | 0.9282 | 1.0068 | 0.0346 |
| SPPL2B     | 0.9239 | 1.1579 | 1.0133 | 0.9322 | 1.0068 | 0.0542 |
| EMID1      | 1.0028 | 1.0571 | 1.0322 | 0.9351 | 1.0068 | 0.0263 |
| LOC647760  | 0.9193 | 1.0879 | 1.0868 | 0.9333 | 1.0068 | 0.0466 |
| MAMDC2     | 0.9258 | 1.0954 | 1.0730 | 0.9332 | 1.0069 | 0.0449 |
| LOC645837  | 0.8607 | 1.4045 | 0.8866 | 0.8755 | 1.0069 | 0.1327 |
| DKFZp547K0 | 0.9775 | 1.0565 | 1.0678 | 0.9256 | 1.0069 | 0.0337 |
| LOC652272  | 0.9640 | 1.1197 | 1.0276 | 0.9162 | 1.0069 | 0.0440 |
| HCG4P6     | 0.9230 | 1.1057 | 1.0893 | 0.9095 | 1.0069 | 0.0525 |
| LOC649858  | 0.9845 | 1.1070 | 1.0144 | 0.9216 | 1.0069 | 0.0386 |
| NBEA       | 0.9574 | 1.0719 | 1.1224 | 0.8758 | 1.0069 | 0.0557 |
| NPEPL1     | 0.8421 | 1.2564 | 1.1250 | 0.8040 | 1.0069 | 0.1097 |
| MIR1243    | 0.9922 | 0.9845 | 1.0327 | 1.0182 | 1.0069 | 0.0112 |
| LOC643420  | 0.9376 | 1.0495 | 1.0778 | 0.9626 | 1.0069 | 0.0337 |
| MMRN2      | 1.0064 | 1.1289 | 1.0601 | 0.8321 | 1.0069 | 0.0634 |
| SMAD3      | 1.0163 | 1.0925 | 0.9887 | 0.9301 | 1.0069 | 0.0337 |
| LOC644853  | 0.8837 | 1.1526 | 1.0384 | 0.9529 | 1.0069 | 0.0580 |
| FLJ45872   | 1.0102 | 1.1118 | 0.9695 | 0.9362 | 1.0069 | 0.0381 |
| LOC727983  | 0.8973 | 1.1955 | 1.0768 | 0.8580 | 1.0069 | 0.0789 |
| C11orf16   | 0.9646 | 1.0786 | 1.0412 | 0.9433 | 1.0069 | 0.0318 |
| HEPN1      | 0.9774 | 1.0242 | 1.0439 | 0.9821 | 1.0069 | 0.0162 |
| LOC641742  | 0.8872 | 1.1521 | 1.0635 | 0.9250 | 1.0069 | 0.0614 |
| LOC650151  | 0.9504 | 1.1802 | 0.9313 | 0.9659 | 1.0069 | 0.0582 |
| LOC731035  | 0.9836 | 1.0855 | 1.0491 | 0.9096 | 1.0070 | 0.0387 |
| LOC644631  | 0.9727 | 1.0671 | 1.0385 | 0.9496 | 1.0070 | 0.0275 |
| LOC730845  | 1.0727 | 1.1098 | 0.9324 | 0.9130 | 1.0070 | 0.0494 |

|            |        |        |        |        |        |        |
|------------|--------|--------|--------|--------|--------|--------|
| C1orf129   | 0.9366 | 1.0809 | 1.0354 | 0.9750 | 1.0070 | 0.0319 |
| LOC730953  | 0.8862 | 1.0173 | 1.1186 | 1.0058 | 1.0070 | 0.0476 |
| MIR620     | 0.9421 | 1.1673 | 0.9873 | 0.9312 | 1.0070 | 0.0548 |
| LOC653185  | 0.9445 | 1.1337 | 1.0492 | 0.9005 | 1.0070 | 0.0525 |
| CD86       | 0.9491 | 1.0982 | 1.0245 | 0.9562 | 1.0070 | 0.0348 |
| LOC653962  | 1.0641 | 1.0496 | 0.9897 | 0.9245 | 1.0070 | 0.0319 |
| LOC1001287 | 0.9954 | 1.1037 | 1.0115 | 0.9173 | 1.0070 | 0.0382 |
| GIMAP5     | 0.9954 | 1.1232 | 0.9814 | 0.9279 | 1.0070 | 0.0414 |
| PBXIP1     | 0.9781 | 1.1318 | 0.9654 | 0.9528 | 1.0070 | 0.0419 |
| RANBP6     | 0.8996 | 1.2549 | 1.1004 | 0.7731 | 1.0070 | 0.1066 |
| SP5        | 0.9446 | 1.1049 | 1.0351 | 0.9435 | 1.0070 | 0.0390 |
| LOC651427  | 0.9465 | 1.0884 | 1.0288 | 0.9644 | 1.0070 | 0.0324 |
| MAP2K1IP1  | 0.8250 | 1.2969 | 1.1557 | 0.7506 | 1.0070 | 0.1307 |
| KIAA1486   | 0.9645 | 1.0358 | 1.0665 | 0.9614 | 1.0070 | 0.0262 |
| LOC653155  | 1.0245 | 1.0491 | 1.0021 | 0.9525 | 1.0071 | 0.0206 |
| ITGB1BP3   | 0.9561 | 1.1378 | 0.9889 | 0.9454 | 1.0071 | 0.0446 |
| LOC1001337 | 1.0475 | 1.0611 | 1.0267 | 0.8930 | 1.0071 | 0.0387 |
| RET        | 0.9814 | 1.1300 | 0.9877 | 0.9292 | 1.0071 | 0.0430 |
| C7orf70    | 0.8213 | 1.3516 | 0.9404 | 0.9150 | 1.0071 | 0.1177 |
| ZBTB7A     | 0.8205 | 1.4139 | 0.9728 | 0.8212 | 1.0071 | 0.1402 |
| LOC441666  | 0.8314 | 1.2771 | 1.0216 | 0.8983 | 1.0071 | 0.0983 |
| LOC1001330 | 0.9222 | 1.2214 | 1.0840 | 0.8008 | 1.0071 | 0.0920 |
| LOC1001285 | 0.9327 | 1.1048 | 1.0799 | 0.9110 | 1.0071 | 0.0497 |
| FAT3       | 0.9192 | 1.1136 | 0.9738 | 1.0218 | 1.0071 | 0.0412 |
| ARHGAP12   | 0.8770 | 1.3529 | 0.9793 | 0.8193 | 1.0071 | 0.1199 |
| LOC646345  | 0.9843 | 1.1094 | 0.9800 | 0.9548 | 1.0071 | 0.0347 |
| GPR139     | 0.9141 | 1.0352 | 1.1231 | 0.9561 | 1.0071 | 0.0461 |
| GPR39      | 0.9399 | 1.0502 | 1.1091 | 0.9293 | 1.0071 | 0.0436 |
| CCDC60     | 0.9773 | 1.0826 | 1.0953 | 0.8733 | 1.0071 | 0.0519 |
| LOC652510  | 0.9151 | 1.1067 | 1.0300 | 0.9768 | 1.0071 | 0.0407 |
| LRP6       | 0.9342 | 1.2835 | 0.9749 | 0.8360 | 1.0071 | 0.0966 |
| SMAGP      | 0.9609 | 1.1133 | 1.0788 | 0.8756 | 1.0072 | 0.0547 |
| GRIN3B     | 0.8785 | 1.1868 | 1.0804 | 0.8829 | 1.0072 | 0.0762 |
| LOC730179  | 1.0218 | 1.1010 | 1.0210 | 0.8848 | 1.0072 | 0.0449 |
| ASAP3      | 0.9548 | 1.3343 | 0.9254 | 0.8141 | 1.0072 | 0.1132 |
| LOC652842  | 0.8539 | 1.1117 | 1.0992 | 0.9639 | 1.0072 | 0.0611 |
| TRY6       | 0.8929 | 1.1210 | 1.0708 | 0.9441 | 1.0072 | 0.0533 |
| RXRA       | 1.0543 | 1.2670 | 0.8728 | 0.8347 | 1.0072 | 0.0990 |
| IKZF1      | 0.9630 | 1.0512 | 1.0696 | 0.9451 | 1.0072 | 0.0312 |
| LOC1001295 | 0.9505 | 1.2366 | 1.0278 | 0.8140 | 1.0072 | 0.0883 |
| LOC652078  | 0.9946 | 1.1071 | 0.9756 | 0.9517 | 1.0072 | 0.0344 |
| LOC650003  | 0.9600 | 1.0958 | 1.0753 | 0.8980 | 1.0072 | 0.0471 |
| MMP16      | 0.9382 | 1.1247 | 1.1093 | 0.8568 | 1.0073 | 0.0656 |
| HRG        | 0.9456 | 1.1267 | 1.0485 | 0.9082 | 1.0073 | 0.0496 |
| SSR4       | 0.8783 | 1.4763 | 1.0459 | 0.6286 | 1.0073 | 0.1783 |
| LMTK2      | 0.9646 | 1.1031 | 0.9647 | 0.9966 | 1.0073 | 0.0328 |

|            |        |        |        |        |        |        |
|------------|--------|--------|--------|--------|--------|--------|
| LOC440848  | 0.9144 | 1.0008 | 1.1300 | 0.9840 | 1.0073 | 0.0450 |
| LOC729549  | 0.9384 | 1.0663 | 1.0604 | 0.9640 | 1.0073 | 0.0328 |
| LOC643242  | 0.9495 | 1.1277 | 0.9434 | 1.0085 | 1.0073 | 0.0427 |
| CRADD      | 0.9241 | 1.3975 | 0.9278 | 0.7798 | 1.0073 | 0.1346 |
| RAD9B      | 0.8884 | 1.1687 | 1.0881 | 0.8839 | 1.0073 | 0.0718 |
| PRKCABP    | 1.0060 | 1.1794 | 0.9792 | 0.8646 | 1.0073 | 0.0650 |
| ANXA10     | 0.9800 | 1.0994 | 1.0961 | 0.8536 | 1.0073 | 0.0583 |
| LOC646461  | 0.9406 | 1.1363 | 1.0206 | 0.9316 | 1.0073 | 0.0474 |
| ALX4       | 0.8349 | 1.1580 | 1.1386 | 0.8978 | 1.0073 | 0.0825 |
| ZNF204     | 0.9334 | 1.1235 | 1.0282 | 0.9442 | 1.0073 | 0.0441 |
| LOC651561  | 0.9613 | 1.1082 | 1.1047 | 0.8551 | 1.0073 | 0.0612 |
| LOC728310  | 1.0129 | 1.0712 | 1.0432 | 0.9021 | 1.0073 | 0.0371 |
| SLC5A2     | 0.9416 | 1.0783 | 1.0664 | 0.9432 | 1.0074 | 0.0376 |
| LOC646512  | 1.0845 | 1.0019 | 0.9808 | 0.9622 | 1.0074 | 0.0270 |
| LOC647711  | 1.0220 | 1.0966 | 0.9481 | 0.9628 | 1.0074 | 0.0338 |
| KIAA0427   | 0.9277 | 1.2228 | 1.1118 | 0.7672 | 1.0074 | 0.1006 |
| LOC644781  | 0.9413 | 1.1468 | 0.9554 | 0.9861 | 1.0074 | 0.0474 |
| ERCC-00113 | 0.9000 | 1.1757 | 1.0036 | 0.9503 | 1.0074 | 0.0599 |
| AMBP       | 0.9958 | 0.9924 | 1.0336 | 1.0079 | 1.0074 | 0.0093 |
| DUOX2      | 0.9623 | 1.0036 | 1.1379 | 0.9259 | 1.0074 | 0.0463 |
| LOC391276  | 0.9697 | 1.0247 | 1.0652 | 0.9702 | 1.0074 | 0.0232 |
| FAM91A2    | 0.9901 | 1.0824 | 1.0608 | 0.8964 | 1.0074 | 0.0419 |
| LOC650346  | 1.0222 | 1.0019 | 1.0311 | 0.9745 | 1.0074 | 0.0126 |
| LOC286456  | 1.0651 | 1.0492 | 1.0288 | 0.8867 | 1.0074 | 0.0409 |
| MIR211     | 1.1330 | 1.0463 | 0.9641 | 0.8863 | 1.0074 | 0.0531 |
| TMEM195    | 0.9691 | 1.0556 | 0.9659 | 1.0392 | 1.0074 | 0.0233 |
| LOC648489  | 0.9203 | 1.0639 | 1.0831 | 0.9624 | 1.0074 | 0.0393 |
| DAOA       | 1.0260 | 1.0272 | 1.0507 | 0.9260 | 1.0075 | 0.0278 |
| OR2L8      | 0.9804 | 0.9976 | 1.0506 | 1.0013 | 1.0075 | 0.0151 |
| LOC652483  | 0.8114 | 1.2392 | 1.1187 | 0.8607 | 1.0075 | 0.1025 |
| BST2       | 0.8733 | 1.1277 | 0.9895 | 1.0395 | 1.0075 | 0.0531 |
| SLC18A3    | 0.9443 | 1.0914 | 1.0524 | 0.9420 | 1.0075 | 0.0380 |
| LY6K       | 0.9467 | 1.0805 | 1.0867 | 0.9162 | 1.0075 | 0.0444 |
| LOC643799  | 0.8978 | 1.1429 | 1.0964 | 0.8930 | 1.0075 | 0.0654 |
| PCDHGB2    | 0.9864 | 1.1197 | 1.0041 | 0.9197 | 1.0075 | 0.0416 |
| ZNF708     | 1.0220 | 1.0440 | 1.0620 | 0.9021 | 1.0075 | 0.0361 |
| DLD        | 0.8349 | 1.2664 | 1.3289 | 0.5999 | 1.0075 | 0.1747 |
| LOC442512  | 0.9728 | 1.1354 | 1.0312 | 0.8907 | 1.0075 | 0.0514 |
| LOC1001338 | 0.9982 | 1.0214 | 1.0975 | 0.9131 | 1.0075 | 0.0380 |
| LOC652665  | 1.0308 | 1.0383 | 1.0965 | 0.8645 | 1.0075 | 0.0499 |
| LOC644642  | 0.9409 | 1.0640 | 1.0518 | 0.9735 | 1.0075 | 0.0299 |
| SLC2A2     | 0.9264 | 1.0907 | 1.0266 | 0.9866 | 1.0076 | 0.0345 |
| RNF40      | 0.9261 | 1.4112 | 0.9635 | 0.7294 | 1.0076 | 0.1440 |
| BCAS2      | 0.9967 | 1.0694 | 1.1534 | 0.8108 | 1.0076 | 0.0730 |
| PAPSS2     | 1.0822 | 1.0033 | 1.0484 | 0.8965 | 1.0076 | 0.0404 |
| OR9Q2      | 0.8952 | 1.0648 | 1.0454 | 1.0250 | 1.0076 | 0.0383 |



|            |        |        |        |        |        |        |
|------------|--------|--------|--------|--------|--------|--------|
| ANKRD26    | 0.9688 | 1.2998 | 1.0036 | 0.7582 | 1.0076 | 0.1115 |
| LOC648154  | 0.9376 | 1.1631 | 1.0675 | 0.8623 | 1.0076 | 0.0669 |
| LOC643153  | 0.9911 | 1.0930 | 1.1306 | 0.8158 | 1.0076 | 0.0704 |
| CLPTM1     | 1.0344 | 1.1045 | 0.9716 | 0.9200 | 1.0076 | 0.0399 |
| SF3A3      | 0.8329 | 1.2143 | 1.1126 | 0.8708 | 1.0076 | 0.0926 |
| LRBA       | 0.8866 | 1.3482 | 1.0525 | 0.7433 | 1.0076 | 0.1299 |
| FAM92A3    | 0.9447 | 1.1672 | 0.9777 | 0.9410 | 1.0077 | 0.0538 |
| PRIM2      | 0.8028 | 1.1023 | 1.0667 | 1.0588 | 1.0077 | 0.0690 |
| LOC1001338 | 1.0200 | 1.1404 | 1.0960 | 0.7742 | 1.0077 | 0.0817 |
| HS3ST1     | 0.9828 | 1.1711 | 0.9974 | 0.8794 | 1.0077 | 0.0605 |
| IL28RA     | 0.9245 | 1.0876 | 1.0518 | 0.9667 | 1.0077 | 0.0376 |
| LOC1001329 | 0.9696 | 1.1133 | 0.9928 | 0.9550 | 1.0077 | 0.0361 |
| CLDN11     | 0.9241 | 1.1986 | 1.0061 | 0.9019 | 1.0077 | 0.0675 |
| SDR39U1    | 0.8974 | 1.2901 | 1.1394 | 0.7039 | 1.0077 | 0.1296 |
| IQCA1      | 1.0160 | 1.1454 | 0.9887 | 0.8807 | 1.0077 | 0.0544 |
| FCRLA      | 0.8893 | 1.1003 | 1.0704 | 0.9708 | 1.0077 | 0.0482 |
| LOC1001339 | 0.8898 | 1.0481 | 1.1835 | 0.9095 | 1.0077 | 0.0684 |
| C11orf88   | 0.9901 | 1.0462 | 1.0687 | 0.9259 | 1.0077 | 0.0319 |
| ZNF44      | 0.9459 | 1.0975 | 1.0441 | 0.9435 | 1.0077 | 0.0380 |
| TSPAN6     | 1.0000 | 1.1748 | 0.9964 | 0.8599 | 1.0077 | 0.0645 |
| LOC642744  | 1.0973 | 0.9760 | 1.0618 | 0.8959 | 1.0078 | 0.0451 |
| ELMOD3     | 1.0181 | 1.2012 | 1.0564 | 0.7552 | 1.0078 | 0.0929 |
| ZNF83      | 0.8935 | 1.1159 | 1.1564 | 0.8652 | 1.0078 | 0.0748 |
| KIAA1666   | 0.8398 | 1.1526 | 1.1321 | 0.9066 | 1.0078 | 0.0790 |
| DNAI1      | 0.9541 | 1.0229 | 1.0468 | 1.0073 | 1.0078 | 0.0196 |
| TMEFF1     | 0.9639 | 1.0949 | 1.0275 | 0.9448 | 1.0078 | 0.0340 |
| C10orf40   | 0.9037 | 1.0077 | 1.0999 | 1.0198 | 1.0078 | 0.0403 |
| LOC642712  | 0.9951 | 1.0688 | 1.0072 | 0.9600 | 1.0078 | 0.0227 |
| LOC653748  | 0.9430 | 1.0919 | 1.0520 | 0.9442 | 1.0078 | 0.0379 |
| C2orf34    | 0.8143 | 1.3741 | 1.0435 | 0.7992 | 1.0078 | 0.1343 |
| LOC645396  | 0.9496 | 1.1068 | 1.0689 | 0.9059 | 1.0078 | 0.0477 |
| SEL1L2     | 0.9154 | 1.0831 | 1.1858 | 0.8468 | 1.0078 | 0.0774 |
| NCKAP5     | 0.9628 | 1.0814 | 1.0989 | 0.8881 | 1.0078 | 0.0501 |
| LOC730796  | 0.9496 | 1.1211 | 1.0159 | 0.9448 | 1.0078 | 0.0411 |
| ZDHHC2     | 1.0347 | 1.0657 | 1.0681 | 0.8629 | 1.0079 | 0.0489 |
| LOC1001310 | 0.9034 | 1.1152 | 1.0471 | 0.9656 | 1.0079 | 0.0463 |
| C12orf50   | 0.9401 | 1.1452 | 1.0244 | 0.9219 | 1.0079 | 0.0509 |
| CYP11B1    | 0.9865 | 1.0826 | 0.9986 | 0.9639 | 1.0079 | 0.0259 |
| MIR1237    | 0.9557 | 1.1943 | 0.9234 | 0.9582 | 1.0079 | 0.0626 |
| LOC649563  | 0.9422 | 1.0265 | 1.0723 | 0.9906 | 1.0079 | 0.0276 |
| LOC728729  | 1.0056 | 1.1011 | 1.0037 | 0.9212 | 1.0079 | 0.0368 |
| LOC646484  | 1.0165 | 1.0813 | 1.0014 | 0.9324 | 1.0079 | 0.0306 |
| LOC728012  | 1.0875 | 1.0300 | 0.9880 | 0.9260 | 1.0079 | 0.0341 |
| SNAPC1     | 0.8637 | 1.3204 | 0.9983 | 0.8492 | 1.0079 | 0.1095 |
| LOC642740  | 0.9841 | 1.1010 | 1.0773 | 0.8693 | 1.0079 | 0.0526 |
| LOC729185  | 0.8598 | 1.1794 | 1.1047 | 0.8878 | 1.0079 | 0.0791 |

|            |        |        |        |        |        |        |
|------------|--------|--------|--------|--------|--------|--------|
| FLJ32063   | 1.0394 | 1.1068 | 0.9819 | 0.9035 | 1.0079 | 0.0431 |
| LOC1001278 | 0.9712 | 1.0179 | 1.1351 | 0.9075 | 1.0079 | 0.0481 |
| RDH8       | 0.8902 | 1.1048 | 1.1085 | 0.9283 | 1.0079 | 0.0575 |
| LOC649255  | 0.9161 | 0.9930 | 1.1172 | 1.0056 | 1.0079 | 0.0414 |
| UTY        | 0.9786 | 1.1335 | 1.0225 | 0.8972 | 1.0079 | 0.0493 |
| ATP8A1     | 0.9771 | 1.1575 | 1.0293 | 0.8679 | 1.0080 | 0.0601 |
| APOA5      | 0.9541 | 1.2932 | 0.9039 | 0.8807 | 1.0080 | 0.0963 |
| LOC643755  | 0.9476 | 1.0378 | 0.9851 | 1.0615 | 1.0080 | 0.0257 |
| LOC1001295 | 0.9347 | 1.1606 | 1.0622 | 0.8744 | 1.0080 | 0.0642 |
| OR5A1      | 0.9501 | 1.1076 | 1.0288 | 0.9454 | 1.0080 | 0.0383 |
| LOC653683  | 1.0136 | 1.0761 | 0.9885 | 0.9536 | 1.0080 | 0.0258 |
| NEFM       | 0.9779 | 1.0696 | 0.9814 | 1.0030 | 1.0080 | 0.0213 |
| LOC727984  | 0.7335 | 1.1589 | 1.5005 | 0.6390 | 1.0080 | 0.1994 |
| LOC644761  | 0.8855 | 1.3510 | 1.0707 | 0.7247 | 1.0080 | 0.1344 |
| LIMD1      | 1.0444 | 1.0629 | 1.0146 | 0.9101 | 1.0080 | 0.0341 |
| CAMSAP1    | 0.8647 | 1.5137 | 0.9904 | 0.6633 | 1.0080 | 0.1815 |
| SNORD114-3 | 1.0040 | 1.0711 | 1.0730 | 0.8839 | 1.0080 | 0.0444 |
| SLC22A18   | 0.9540 | 1.2969 | 0.9618 | 0.8195 | 1.0080 | 0.1017 |
| RPS19      | 0.8431 | 1.0974 | 1.2225 | 0.8692 | 1.0080 | 0.0915 |
| LOC647295  | 1.0356 | 1.0450 | 0.9361 | 1.0154 | 1.0080 | 0.0248 |
| RAB3A      | 0.9037 | 1.2927 | 0.9804 | 0.8553 | 1.0080 | 0.0983 |
| CXorf12    | 1.0448 | 1.2961 | 0.8648 | 0.8266 | 1.0081 | 0.1071 |
| ANGPT1     | 0.9240 | 1.1873 | 0.9867 | 0.9343 | 1.0081 | 0.0613 |
| ARHGAP20   | 1.0640 | 1.1012 | 1.0680 | 0.7991 | 1.0081 | 0.0702 |
| DLK1       | 0.9634 | 1.1552 | 0.9838 | 0.9299 | 1.0081 | 0.0503 |
| KLK10      | 0.9126 | 1.1565 | 1.0774 | 0.8858 | 1.0081 | 0.0651 |
| C1orf170   | 0.8371 | 1.1503 | 1.1046 | 0.9403 | 1.0081 | 0.0727 |
| SNORA1     | 0.9305 | 1.1100 | 1.0155 | 0.9764 | 1.0081 | 0.0382 |
| DEFB121    | 0.9340 | 1.0645 | 1.0652 | 0.9686 | 1.0081 | 0.0335 |
| OR5M1      | 1.0164 | 1.0692 | 1.0292 | 0.9176 | 1.0081 | 0.0322 |
| ZNF805     | 0.9933 | 1.1862 | 1.0810 | 0.7718 | 1.0081 | 0.0881 |
| NFATC4     | 0.9174 | 1.1335 | 1.0478 | 0.9337 | 1.0081 | 0.0509 |
| FAM22D     | 0.9621 | 1.1272 | 1.0549 | 0.8881 | 1.0081 | 0.0524 |
| LOC90586   | 0.9026 | 1.1037 | 1.2302 | 0.7959 | 1.0081 | 0.0977 |
| LOC644083  | 0.9529 | 1.2072 | 0.9822 | 0.8901 | 1.0081 | 0.0691 |
| LRRIQ4     | 0.9437 | 1.1359 | 1.0735 | 0.8795 | 1.0081 | 0.0587 |
| LOC642916  | 0.8361 | 1.2016 | 1.1091 | 0.8858 | 1.0081 | 0.0876 |
| MIR1255B2  | 0.9149 | 1.1055 | 1.1093 | 0.9029 | 1.0081 | 0.0574 |
| MIR1911    | 0.9749 | 1.1358 | 1.0236 | 0.8984 | 1.0081 | 0.0497 |
| CD300LD    | 1.0060 | 1.1208 | 1.0253 | 0.8806 | 1.0082 | 0.0494 |
| ZNF324     | 0.8977 | 1.3816 | 0.9705 | 0.7828 | 1.0082 | 0.1304 |
| TRIM62     | 1.0279 | 1.1140 | 1.0654 | 0.8254 | 1.0082 | 0.0634 |
| ZC3H6      | 0.8867 | 1.2034 | 1.0550 | 0.8876 | 1.0082 | 0.0762 |
| LOC654115  | 1.0694 | 1.0140 | 1.0448 | 0.9045 | 1.0082 | 0.0364 |
| LOC1001317 | 0.9586 | 1.0998 | 1.0789 | 0.8955 | 1.0082 | 0.0488 |
| OR2M4      | 0.9214 | 1.1157 | 0.9823 | 1.0134 | 1.0082 | 0.0406 |

|            |        |        |        |        |        |        |
|------------|--------|--------|--------|--------|--------|--------|
| CD300LF    | 1.0101 | 0.9811 | 1.1166 | 0.9251 | 1.0082 | 0.0402 |
| C10orf111  | 1.0283 | 1.1173 | 1.0364 | 0.8508 | 1.0082 | 0.0562 |
| LOC654253  | 1.0638 | 1.2562 | 0.9576 | 0.7553 | 1.0082 | 0.1045 |
| LOC653567  | 0.8609 | 1.2784 | 0.9255 | 0.9681 | 1.0082 | 0.0927 |
| ZNF833     | 0.8729 | 1.1016 | 1.0971 | 0.9613 | 1.0082 | 0.0556 |
| CHRD       | 1.0562 | 1.0790 | 0.8873 | 1.0105 | 1.0082 | 0.0428 |
| ISY1       | 0.8153 | 1.4028 | 1.0686 | 0.7463 | 1.0082 | 0.1486 |
| LOC730656  | 0.8593 | 1.2200 | 0.9441 | 1.0096 | 1.0082 | 0.0770 |
| LOC1001342 | 1.0316 | 1.0927 | 1.0066 | 0.9021 | 1.0083 | 0.0397 |
| FARP1      | 0.9921 | 1.1886 | 0.9709 | 0.8814 | 1.0083 | 0.0647 |
| LOC1001342 | 1.0820 | 0.9801 | 1.0590 | 0.9120 | 1.0083 | 0.0388 |
| MYOZ2      | 0.9928 | 1.0236 | 1.0663 | 0.9505 | 1.0083 | 0.0245 |
| LOC642558  | 1.0141 | 1.0745 | 1.0603 | 0.8843 | 1.0083 | 0.0433 |
| DLGAP3     | 0.8762 | 1.0937 | 1.1463 | 0.9171 | 1.0083 | 0.0659 |
| MIR129-2   | 0.8659 | 1.2098 | 1.1970 | 0.7607 | 1.0083 | 0.1147 |
| LOC643008  | 0.9649 | 1.1100 | 1.0553 | 0.9031 | 1.0083 | 0.0461 |
| TBKBP1     | 0.9413 | 1.1068 | 0.9952 | 0.9900 | 1.0083 | 0.0350 |
| GRIK1      | 0.9675 | 1.0979 | 1.0467 | 0.9212 | 1.0083 | 0.0395 |
| LOC1001280 | 0.8974 | 1.1751 | 1.0528 | 0.9081 | 1.0084 | 0.0659 |
| LOC650678  | 1.0274 | 1.1225 | 0.9068 | 0.9769 | 1.0084 | 0.0454 |
| LOC1001339 | 0.9892 | 1.0982 | 1.0325 | 0.9136 | 1.0084 | 0.0387 |
| EDEM3      | 0.9081 | 1.2353 | 1.0497 | 0.8403 | 1.0084 | 0.0873 |
| LRRIQ1     | 0.9332 | 1.1415 | 1.0040 | 0.9548 | 1.0084 | 0.0468 |
| CHIA       | 0.9385 | 1.1090 | 1.0142 | 0.9718 | 1.0084 | 0.0369 |
| LOC728163  | 0.9592 | 1.2002 | 0.9578 | 0.9163 | 1.0084 | 0.0647 |
| LOC441362  | 0.9482 | 1.0624 | 1.1209 | 0.9021 | 1.0084 | 0.0504 |
| LOC644133  | 0.9348 | 1.1523 | 1.1097 | 0.8369 | 1.0084 | 0.0741 |
| C1orf110   | 0.9699 | 1.0621 | 1.0430 | 0.9587 | 1.0084 | 0.0259 |
| LOC399746  | 0.9084 | 1.0916 | 1.1185 | 0.9151 | 1.0084 | 0.0561 |
| C12orf56   | 0.8601 | 1.0619 | 1.0782 | 1.0334 | 1.0084 | 0.0503 |
| NEXN       | 0.9262 | 1.1159 | 1.0565 | 0.9350 | 1.0084 | 0.0465 |
| LAMA4      | 0.9586 | 1.0819 | 1.0381 | 0.9552 | 1.0084 | 0.0311 |
| CCHCR1     | 0.9063 | 1.0888 | 1.0581 | 0.9805 | 1.0084 | 0.0410 |
| LOC646040  | 0.9876 | 0.9829 | 1.0796 | 0.9837 | 1.0084 | 0.0237 |
| MIR1278    | 1.0027 | 1.0801 | 1.0675 | 0.8835 | 1.0084 | 0.0450 |
| LOC374443  | 0.9359 | 1.1356 | 1.1336 | 0.8287 | 1.0085 | 0.0760 |
| MFAP1      | 0.9767 | 1.3044 | 1.0315 | 0.7212 | 1.0085 | 0.1196 |
| LOC646476  | 0.9519 | 1.3375 | 0.9012 | 0.8434 | 1.0085 | 0.1119 |
| GNMT       | 1.0295 | 1.3895 | 0.9056 | 0.7094 | 1.0085 | 0.1431 |
| FIP1L1     | 0.8263 | 1.3417 | 1.0324 | 0.8337 | 1.0085 | 0.1209 |
| SULT6B1    | 0.9122 | 1.1034 | 1.0312 | 0.9872 | 1.0085 | 0.0400 |
| BHLHB9     | 0.9601 | 1.2746 | 1.0789 | 0.7205 | 1.0085 | 0.1158 |
| F2R        | 1.0041 | 1.2545 | 1.0046 | 0.7709 | 1.0085 | 0.0988 |
| LOC728937  | 0.9874 | 1.0816 | 1.1261 | 0.8390 | 1.0085 | 0.0635 |
| LOC646226  | 0.9561 | 1.0564 | 1.0962 | 0.9255 | 1.0085 | 0.0404 |
| LOC440419  | 1.0032 | 1.0780 | 0.9606 | 0.9924 | 1.0085 | 0.0249 |

|            |        |        |        |        |        |        |
|------------|--------|--------|--------|--------|--------|--------|
| TRIM49     | 0.8784 | 1.0982 | 1.0560 | 1.0015 | 1.0085 | 0.0477 |
| TTC24      | 0.9746 | 1.0427 | 1.0641 | 0.9527 | 1.0085 | 0.0267 |
| LOC1001302 | 0.9603 | 1.0341 | 1.0906 | 0.9492 | 1.0086 | 0.0332 |
| LOC642576  | 0.9504 | 0.9458 | 1.1230 | 1.0150 | 1.0086 | 0.0413 |
| RALGAPA2   | 0.9328 | 1.0827 | 1.0491 | 0.9697 | 1.0086 | 0.0346 |
| LOC643752  | 1.0228 | 1.0784 | 0.9507 | 0.9824 | 1.0086 | 0.0275 |
| GSTA5      | 0.9203 | 1.1370 | 1.0201 | 0.9569 | 1.0086 | 0.0475 |
| LOC650850  | 1.0651 | 1.0485 | 0.9611 | 0.9596 | 1.0086 | 0.0281 |
| LOC730240  | 1.0773 | 1.1351 | 1.0219 | 0.8001 | 1.0086 | 0.0732 |
| LOC1001298 | 0.9382 | 1.0584 | 1.1292 | 0.9086 | 1.0086 | 0.0516 |
| LOC1001332 | 0.8863 | 1.0081 | 1.1537 | 0.9863 | 1.0086 | 0.0552 |
| ZNF831     | 0.9656 | 1.0239 | 1.0748 | 0.9702 | 1.0086 | 0.0257 |
| C8orf22    | 0.9774 | 1.1731 | 1.0439 | 0.8401 | 1.0086 | 0.0693 |
| LOC642406  | 1.0752 | 1.0592 | 0.9475 | 0.9526 | 1.0086 | 0.0340 |
| PCDHGA10   | 0.9503 | 1.1430 | 1.0117 | 0.9295 | 1.0086 | 0.0481 |
| LOC1001310 | 0.9632 | 1.0592 | 1.0146 | 0.9975 | 1.0086 | 0.0200 |
| KCNK15     | 0.8882 | 1.2022 | 1.0658 | 0.8783 | 1.0086 | 0.0776 |
| FBN2       | 1.0364 | 1.1537 | 0.9813 | 0.8631 | 1.0086 | 0.0604 |
| LOC441459  | 1.0384 | 1.1177 | 1.0603 | 0.8182 | 1.0086 | 0.0657 |
| LOC729270  | 0.9325 | 1.1506 | 0.9869 | 0.9646 | 1.0086 | 0.0486 |
| SLC2A10    | 1.0056 | 1.1214 | 1.0355 | 0.8721 | 1.0086 | 0.0517 |
| LOC1001293 | 1.0081 | 1.0361 | 1.1152 | 0.8752 | 1.0086 | 0.0499 |
| MIR891A    | 0.9724 | 1.1046 | 1.0038 | 0.9538 | 1.0087 | 0.0336 |
| OR7E37P    | 1.0417 | 1.2121 | 0.9087 | 0.8723 | 1.0087 | 0.0770 |
| C2orf86    | 0.9877 | 1.0605 | 1.1031 | 0.8834 | 1.0087 | 0.0481 |
| KCNG1      | 0.9862 | 1.1704 | 0.9770 | 0.9010 | 1.0087 | 0.0572 |
| B3GNT3     | 0.8993 | 1.1802 | 0.9786 | 0.9766 | 1.0087 | 0.0601 |
| LOC1001281 | 0.9197 | 1.0149 | 1.1303 | 0.9700 | 1.0087 | 0.0449 |
| CER1       | 1.0037 | 1.0523 | 1.0657 | 0.9131 | 1.0087 | 0.0345 |
| GPC5       | 0.9628 | 1.1402 | 1.0402 | 0.8917 | 1.0087 | 0.0533 |
| LOC648700  | 1.0429 | 1.0980 | 1.0082 | 0.8857 | 1.0087 | 0.0450 |
| LOC644484  | 1.0887 | 1.0385 | 0.9302 | 0.9774 | 1.0087 | 0.0347 |
| DTX3L      | 1.0223 | 1.1507 | 0.9276 | 0.9342 | 1.0087 | 0.0520 |
| MIR375     | 0.9012 | 1.1648 | 1.0737 | 0.8952 | 1.0087 | 0.0665 |
| OR51M1     | 0.8376 | 1.1907 | 1.0529 | 0.9537 | 1.0087 | 0.0749 |
| TAF6       | 0.8897 | 1.2345 | 1.0591 | 0.8516 | 1.0087 | 0.0877 |
| LOC1001314 | 1.0647 | 1.0734 | 1.0409 | 0.8559 | 1.0087 | 0.0514 |
| LOC441253  | 0.8828 | 1.0867 | 1.1474 | 0.9180 | 1.0087 | 0.0642 |
| THAP2      | 0.9973 | 1.0374 | 1.0921 | 0.9082 | 1.0087 | 0.0387 |
| LOC649503  | 1.0333 | 1.0076 | 0.9865 | 1.0075 | 1.0087 | 0.0096 |
| LOC644234  | 0.8747 | 1.2679 | 1.0294 | 0.8630 | 1.0087 | 0.0943 |
| LOC653276  | 0.9443 | 1.1217 | 1.0543 | 0.9148 | 1.0088 | 0.0481 |
| LOC644656  | 1.0726 | 0.9002 | 1.0536 | 1.0086 | 1.0088 | 0.0386 |
| LOC652530  | 0.9414 | 1.0494 | 1.1186 | 0.9257 | 1.0088 | 0.0458 |
| THY1       | 0.9400 | 1.0287 | 1.1641 | 0.9023 | 1.0088 | 0.0582 |
| HOXA11     | 0.9617 | 1.0057 | 1.0861 | 0.9816 | 1.0088 | 0.0273 |

|            |        |        |        |        |        |        |
|------------|--------|--------|--------|--------|--------|--------|
| LOC728621  | 0.9501 | 1.0480 | 1.0886 | 0.9485 | 1.0088 | 0.0353 |
| TM7SF2     | 1.0122 | 1.2319 | 0.9926 | 0.7985 | 1.0088 | 0.0886 |
| PAEP       | 0.9118 | 1.1139 | 1.0405 | 0.9691 | 1.0088 | 0.0438 |
| PIGZ       | 1.0387 | 1.0878 | 1.0032 | 0.9057 | 1.0088 | 0.0385 |
| NEK5       | 0.9963 | 1.0981 | 0.9745 | 0.9665 | 1.0088 | 0.0304 |
| LOC643797  | 0.9110 | 1.2395 | 0.9583 | 0.9266 | 1.0088 | 0.0775 |
| LOC389300  | 0.8766 | 1.1483 | 1.1410 | 0.8695 | 1.0088 | 0.0784 |
| LOC652100  | 0.9224 | 1.1571 | 0.9552 | 1.0007 | 1.0088 | 0.0519 |
| LOC645335  | 0.9427 | 1.1178 | 1.0686 | 0.9062 | 1.0088 | 0.0503 |
| MAPK11     | 0.9552 | 1.2036 | 1.0360 | 0.8407 | 1.0089 | 0.0763 |
| XKR6       | 0.9309 | 1.1366 | 1.0503 | 0.9176 | 1.0089 | 0.0520 |
| SFRP5      | 0.9403 | 1.1378 | 1.0424 | 0.9150 | 1.0089 | 0.0510 |
| LOC339789  | 0.9821 | 1.0932 | 1.0901 | 0.8702 | 1.0089 | 0.0530 |
| LOC652152  | 0.9775 | 1.0410 | 1.0486 | 0.9685 | 1.0089 | 0.0209 |
| TNFRSF13B  | 0.9287 | 1.0316 | 1.0805 | 0.9948 | 1.0089 | 0.0320 |
| LOC1001337 | 0.9822 | 1.1410 | 1.1567 | 0.7556 | 1.0089 | 0.0932 |
| RARS2      | 0.8403 | 1.3455 | 1.0353 | 0.8145 | 1.0089 | 0.1225 |
| KRT27      | 0.9817 | 1.1094 | 1.0433 | 0.9012 | 1.0089 | 0.0444 |
| GLRX       | 0.8755 | 1.3161 | 1.0311 | 0.8129 | 1.0089 | 0.1122 |
| LOC1001313 | 0.9355 | 1.1303 | 1.0899 | 0.8799 | 1.0089 | 0.0601 |
| RPL6       | 0.9631 | 1.1514 | 1.0849 | 0.8363 | 1.0089 | 0.0695 |
| LOC645279  | 0.9134 | 1.1952 | 1.0580 | 0.8690 | 1.0089 | 0.0741 |
| YIPF3      | 1.0625 | 1.1277 | 1.0897 | 0.7559 | 1.0089 | 0.0854 |
| TFEB       | 0.9289 | 1.1089 | 0.9967 | 1.0012 | 1.0089 | 0.0372 |
| KCNE1L     | 1.0305 | 1.0929 | 1.0458 | 0.8666 | 1.0090 | 0.0493 |
| OR2T4      | 1.0524 | 1.0862 | 0.9383 | 0.9590 | 1.0090 | 0.0358 |
| TAS2R38    | 1.0226 | 1.0669 | 1.0591 | 0.8873 | 1.0090 | 0.0417 |
| SLURP1     | 0.9474 | 1.1003 | 1.0955 | 0.8927 | 1.0090 | 0.0525 |
| MIR571     | 1.0011 | 1.0381 | 1.0217 | 0.9749 | 1.0090 | 0.0136 |
| LOC641846  | 0.8799 | 1.1640 | 1.0077 | 0.9843 | 1.0090 | 0.0587 |
| SLC7A3     | 0.9343 | 1.1038 | 1.0286 | 0.9692 | 1.0090 | 0.0371 |
| KCND3      | 1.0005 | 1.0387 | 1.1169 | 0.8798 | 1.0090 | 0.0494 |
| TTY6       | 0.9368 | 1.1936 | 0.9897 | 0.9160 | 1.0090 | 0.0634 |
| ZNF788     | 0.9564 | 1.0670 | 1.0950 | 0.9176 | 1.0090 | 0.0427 |
| GGNBP1     | 0.9682 | 1.1795 | 1.1243 | 0.7640 | 1.0090 | 0.0931 |
| LOC646609  | 0.9346 | 1.0207 | 1.2001 | 0.8807 | 1.0090 | 0.0699 |
| KCTD7      | 1.0072 | 1.0231 | 1.0873 | 0.9185 | 1.0090 | 0.0348 |
| LOC643938  | 0.9502 | 1.0932 | 1.0514 | 0.9414 | 1.0090 | 0.0376 |
| CNNM1      | 0.9963 | 1.0678 | 1.0179 | 0.9542 | 1.0090 | 0.0236 |
| FRMPD4     | 1.0500 | 1.0960 | 0.9861 | 0.9040 | 1.0090 | 0.0416 |
| KIAA0527   | 0.9462 | 1.1117 | 1.0516 | 0.9267 | 1.0091 | 0.0439 |
| LOC647129  | 0.9812 | 0.9479 | 1.0815 | 1.0256 | 1.0091 | 0.0289 |
| LOC441097  | 0.9141 | 1.0153 | 1.2023 | 0.9046 | 1.0091 | 0.0691 |
| TXNDC11    | 1.1129 | 1.1781 | 0.9364 | 0.8089 | 1.0091 | 0.0840 |
| LOC729427  | 0.9090 | 1.1106 | 1.0581 | 0.9586 | 1.0091 | 0.0459 |
| GJC2       | 0.9460 | 1.2212 | 0.9758 | 0.8933 | 1.0091 | 0.0727 |

|            |        |        |        |        |        |        |
|------------|--------|--------|--------|--------|--------|--------|
| MED15      | 0.9951 | 1.1482 | 0.9293 | 0.9638 | 1.0091 | 0.0483 |
| FREM3      | 0.9151 | 1.0814 | 0.9425 | 1.0973 | 1.0091 | 0.0468 |
| P2RX4      | 0.9743 | 1.2092 | 1.0354 | 0.8175 | 1.0091 | 0.0810 |
| PRPH2      | 0.8857 | 1.1621 | 0.9724 | 1.0161 | 1.0091 | 0.0578 |
| LOC652614  | 0.9810 | 1.0748 | 1.0826 | 0.8980 | 1.0091 | 0.0436 |
| CHRND      | 0.8756 | 1.0763 | 1.0915 | 0.9931 | 1.0091 | 0.0495 |
| LOC1001304 | 0.9538 | 1.1356 | 1.0112 | 0.9358 | 1.0091 | 0.0451 |
| LOC1001302 | 0.9058 | 1.1255 | 1.0489 | 0.9563 | 1.0091 | 0.0488 |
| GAK        | 0.9168 | 1.4224 | 0.9299 | 0.7674 | 1.0091 | 0.1426 |
| LOC642782  | 1.0231 | 0.9958 | 1.1006 | 0.9171 | 1.0091 | 0.0379 |
| LOC646663  | 0.9141 | 1.0975 | 1.0801 | 0.9448 | 1.0091 | 0.0466 |
| PRDM11     | 0.9641 | 1.1403 | 1.0502 | 0.8820 | 1.0091 | 0.0556 |
| HBII-52-45 | 0.9829 | 1.1352 | 1.0174 | 0.9011 | 1.0092 | 0.0486 |
| LOC392382  | 0.9975 | 1.1599 | 0.9843 | 0.8949 | 1.0092 | 0.0552 |
| FAM83E     | 1.0366 | 1.1425 | 0.9767 | 0.8808 | 1.0092 | 0.0548 |
| LCT        | 1.0305 | 1.0391 | 1.0413 | 0.9257 | 1.0092 | 0.0279 |
| HRH4       | 0.9556 | 1.0818 | 1.0846 | 0.9147 | 1.0092 | 0.0435 |
| COL9A1     | 1.0286 | 1.0804 | 0.9860 | 0.9418 | 1.0092 | 0.0296 |
| LOC647011  | 1.0970 | 1.1711 | 0.8901 | 0.8785 | 1.0092 | 0.0737 |
| LOC642049  | 0.8935 | 1.1189 | 1.0781 | 0.9463 | 1.0092 | 0.0533 |
| LOC1001345 | 0.9672 | 1.1506 | 1.0910 | 0.8281 | 1.0092 | 0.0714 |
| LOC647827  | 0.9634 | 1.0966 | 1.0766 | 0.9003 | 1.0092 | 0.0467 |
| LOC648058  | 1.0202 | 1.0157 | 1.0194 | 0.9816 | 1.0092 | 0.0092 |
| LOC1001343 | 0.9281 | 1.1423 | 1.0231 | 0.9434 | 1.0092 | 0.0490 |
| TRIM78P    | 0.9810 | 1.1225 | 0.9197 | 1.0138 | 1.0092 | 0.0425 |
| LOC728152  | 1.0052 | 1.1915 | 0.9182 | 0.9220 | 1.0092 | 0.0640 |
| TBC1D10A   | 1.0058 | 1.2400 | 0.9566 | 0.8346 | 1.0093 | 0.0849 |
| LOC645944  | 0.9525 | 1.1139 | 1.0184 | 0.9523 | 1.0093 | 0.0382 |
| SIM1       | 1.0410 | 1.1180 | 0.9928 | 0.8853 | 1.0093 | 0.0487 |
| ITGA4      | 0.8495 | 1.0377 | 1.0598 | 1.0901 | 1.0093 | 0.0543 |
| SAMD13     | 0.9746 | 1.3606 | 1.0142 | 0.6879 | 1.0093 | 0.1378 |
| SERHL2     | 0.9952 | 1.1153 | 1.0484 | 0.8783 | 1.0093 | 0.0501 |
| LOC643503  | 0.9738 | 1.1482 | 0.9529 | 0.9625 | 1.0093 | 0.0465 |
| LOC120824  | 0.9901 | 1.1295 | 0.9596 | 0.9582 | 1.0093 | 0.0407 |
| SPRR2D     | 1.0186 | 1.1017 | 1.0375 | 0.8797 | 1.0094 | 0.0467 |
| OR51B2     | 0.9014 | 1.1042 | 1.0724 | 0.9595 | 1.0094 | 0.0475 |
| LDLRAD1    | 1.0192 | 1.0409 | 1.1406 | 0.8368 | 1.0094 | 0.0633 |
| FNDC8      | 0.9309 | 1.0735 | 1.1031 | 0.9299 | 1.0094 | 0.0460 |
| LOC1001316 | 0.9814 | 1.1398 | 1.0375 | 0.8788 | 1.0094 | 0.0545 |
| YY2        | 0.9986 | 1.1686 | 1.0216 | 0.8487 | 1.0094 | 0.0655 |
| MIR1256    | 1.0106 | 1.1103 | 0.9269 | 0.9897 | 1.0094 | 0.0381 |
| LOC651476  | 0.9198 | 0.9350 | 1.0590 | 1.1237 | 1.0094 | 0.0492 |
| HLA-DQA2   | 0.9339 | 1.0865 | 1.0550 | 0.9621 | 1.0094 | 0.0365 |
| UQCC       | 0.9260 | 1.2759 | 1.0858 | 0.7499 | 1.0094 | 0.1122 |
| ODF3       | 0.9188 | 1.2280 | 0.9336 | 0.9572 | 1.0094 | 0.0733 |
| ZNF135     | 0.9990 | 1.0290 | 1.0580 | 0.9516 | 1.0094 | 0.0227 |

|            |        |        |        |        |        |        |
|------------|--------|--------|--------|--------|--------|--------|
| FAM75A1    | 1.0029 | 1.0941 | 1.0607 | 0.8799 | 1.0094 | 0.0471 |
| RAB11FIP5  | 1.0266 | 1.3742 | 0.8421 | 0.7949 | 1.0094 | 0.1315 |
| LOC653702  | 0.8509 | 0.9461 | 1.4704 | 0.7705 | 1.0094 | 0.1578 |
| CACNB3     | 1.1547 | 1.3566 | 0.7526 | 0.7740 | 1.0094 | 0.1480 |
| LOC728737  | 0.9726 | 1.1003 | 1.0586 | 0.9063 | 1.0095 | 0.0435 |
| LOC440895  | 0.9913 | 1.1070 | 1.0433 | 0.8963 | 1.0095 | 0.0445 |
| ABCA5      | 0.9312 | 1.1030 | 1.0775 | 0.9262 | 1.0095 | 0.0469 |
| CRIM1      | 0.8696 | 1.1678 | 1.0669 | 0.9337 | 1.0095 | 0.0669 |
| JARID1C    | 0.9350 | 1.2328 | 0.9664 | 0.9036 | 1.0095 | 0.0755 |
| RSHL3      | 0.9393 | 1.0947 | 1.0795 | 0.9244 | 1.0095 | 0.0450 |
| LOC1001298 | 0.9522 | 1.1459 | 1.0571 | 0.8827 | 1.0095 | 0.0579 |
| C19orf64   | 0.9471 | 1.1805 | 0.9918 | 0.9185 | 1.0095 | 0.0590 |
| OR2AG2     | 0.8988 | 1.2119 | 0.9318 | 0.9954 | 1.0095 | 0.0704 |
| LOC645146  | 0.9790 | 1.1756 | 0.9659 | 0.9174 | 1.0095 | 0.0569 |
| WNT4       | 0.8898 | 1.1876 | 1.0978 | 0.8627 | 1.0095 | 0.0793 |
| CLSTN3     | 0.9854 | 1.1445 | 1.0113 | 0.8969 | 1.0095 | 0.0512 |
| FOLR1      | 0.9541 | 1.1025 | 1.0600 | 0.9214 | 1.0095 | 0.0428 |
| NRCAM      | 0.9476 | 1.1795 | 1.0269 | 0.8841 | 1.0095 | 0.0637 |
| MIR183     | 1.0147 | 1.1184 | 1.0523 | 0.8527 | 1.0095 | 0.0565 |
| LOC652134  | 0.8933 | 1.1126 | 1.0787 | 0.9535 | 1.0095 | 0.0517 |
| SH2D3C     | 0.9606 | 1.1017 | 1.0458 | 0.9300 | 1.0095 | 0.0393 |
| ADAM15     | 0.7910 | 1.5056 | 1.0770 | 0.6646 | 1.0095 | 0.1865 |
| ACTC1      | 0.9482 | 1.0768 | 1.1044 | 0.9088 | 1.0095 | 0.0478 |
| KIR2DL3    | 1.0185 | 1.0789 | 1.0280 | 0.9128 | 1.0096 | 0.0349 |
| CR1L       | 1.0557 | 0.9779 | 1.0650 | 0.9397 | 1.0096 | 0.0304 |
| LOC645553  | 0.9745 | 1.0531 | 1.1285 | 0.8821 | 1.0096 | 0.0528 |
| LOC651062  | 1.0983 | 1.0959 | 1.0116 | 0.8325 | 1.0096 | 0.0624 |
| LOC646812  | 1.0565 | 1.1003 | 0.9829 | 0.8987 | 1.0096 | 0.0442 |
| XCL1       | 0.9252 | 1.1418 | 1.0769 | 0.8944 | 1.0096 | 0.0595 |
| CTLA4      | 0.9289 | 1.1389 | 1.0273 | 0.9432 | 1.0096 | 0.0483 |
| LOC650509  | 0.8781 | 1.0855 | 1.0574 | 1.0173 | 1.0096 | 0.0460 |
| LOC339529  | 0.8867 | 1.0945 | 1.1225 | 0.9348 | 1.0096 | 0.0582 |
| LPAR1      | 1.0121 | 1.0629 | 1.0435 | 0.9200 | 1.0096 | 0.0317 |
| LOC646895  | 0.9605 | 1.1442 | 1.0089 | 0.9249 | 1.0096 | 0.0480 |
| LOC652806  | 0.9038 | 1.0478 | 1.0655 | 1.0215 | 1.0096 | 0.0364 |
| LOC648346  | 0.9604 | 1.1064 | 0.9883 | 0.9835 | 1.0097 | 0.0328 |
| HTR3B      | 0.8814 | 1.0791 | 1.0385 | 1.0397 | 1.0097 | 0.0438 |
| LOC440407  | 0.9253 | 1.1252 | 1.0310 | 0.9571 | 1.0097 | 0.0444 |
| OR4C11     | 0.9900 | 1.0312 | 1.0901 | 0.9274 | 1.0097 | 0.0343 |
| LOC651963  | 0.9500 | 1.0762 | 1.1287 | 0.8839 | 1.0097 | 0.0563 |
| KIAA1602   | 0.9385 | 1.2350 | 1.0188 | 0.8464 | 1.0097 | 0.0830 |
| LOC642769  | 0.9562 | 1.2657 | 0.9657 | 0.8511 | 1.0097 | 0.0892 |
| RALGDS     | 0.8797 | 1.3683 | 1.0198 | 0.7710 | 1.0097 | 0.1299 |
| TAS2R45    | 0.9352 | 1.1071 | 1.1114 | 0.8852 | 1.0097 | 0.0584 |
| IDH3G      | 0.9741 | 1.3331 | 0.9442 | 0.7874 | 1.0097 | 0.1153 |
| ATAD5      | 0.8522 | 1.1366 | 1.1716 | 0.8785 | 1.0097 | 0.0838 |

|            |        |        |        |        |        |        |
|------------|--------|--------|--------|--------|--------|--------|
| FLJ25715   | 1.0036 | 1.1511 | 1.0402 | 0.8439 | 1.0097 | 0.0636 |
| ACCN5      | 0.9709 | 1.1150 | 1.0518 | 0.9012 | 1.0097 | 0.0467 |
| SRL        | 0.9304 | 1.0395 | 1.0087 | 1.0604 | 1.0097 | 0.0285 |
| LOC653557  | 1.0207 | 1.2591 | 0.9907 | 0.7685 | 1.0097 | 0.1004 |
| LOC1001340 | 0.8290 | 1.1261 | 1.1428 | 0.9412 | 1.0097 | 0.0756 |
| LOC728876  | 0.9483 | 1.2014 | 1.0119 | 0.8774 | 1.0097 | 0.0695 |
| LOC729659  | 1.0091 | 1.0738 | 1.0437 | 0.9125 | 1.0098 | 0.0350 |
| PEX10      | 0.9733 | 1.2667 | 1.0365 | 0.7625 | 1.0098 | 0.1038 |
| C3orf56    | 1.0766 | 1.0133 | 1.0882 | 0.8610 | 1.0098 | 0.0522 |
| PPFIA2     | 0.9321 | 1.4563 | 0.8803 | 0.7706 | 1.0098 | 0.1526 |
| LOC644986  | 0.9961 | 1.0761 | 1.0431 | 0.9239 | 1.0098 | 0.0330 |
| RASSF8     | 0.9576 | 1.1025 | 1.0672 | 0.9120 | 1.0098 | 0.0449 |
| LOC642428  | 0.9669 | 0.9951 | 1.0820 | 0.9952 | 1.0098 | 0.0250 |
| C10orf90   | 0.9534 | 1.0119 | 1.1293 | 0.9447 | 1.0098 | 0.0425 |
| LOC652418  | 1.1058 | 1.0878 | 0.9548 | 0.8909 | 1.0098 | 0.0520 |
| LOC651821  | 0.9457 | 1.0516 | 1.0627 | 0.9793 | 1.0098 | 0.0283 |
| DMRTA2     | 1.0426 | 1.0510 | 0.9652 | 0.9805 | 1.0098 | 0.0216 |
| ANKRD20A4  | 0.9153 | 1.0962 | 1.0197 | 1.0082 | 1.0098 | 0.0371 |
| LOC652522  | 0.9436 | 1.1064 | 1.0764 | 0.9131 | 1.0098 | 0.0479 |
| MIR605     | 0.9986 | 1.0119 | 1.0982 | 0.9306 | 1.0099 | 0.0344 |
| IGSF3      | 0.9922 | 1.3099 | 0.9920 | 0.7454 | 1.0099 | 0.1157 |
| APOL5      | 1.0005 | 1.0252 | 1.0333 | 0.9805 | 1.0099 | 0.0120 |
| LOC1001347 | 1.0115 | 1.1507 | 0.9905 | 0.8868 | 1.0099 | 0.0543 |
| RFPL3S     | 0.9589 | 1.0771 | 1.0238 | 0.9797 | 1.0099 | 0.0262 |
| LOC1001343 | 0.8802 | 1.1430 | 1.0970 | 0.9193 | 1.0099 | 0.0647 |
| LARP4      | 0.9695 | 1.2603 | 1.0872 | 0.7224 | 1.0099 | 0.1129 |
| LOC643615  | 0.9907 | 1.1572 | 1.0149 | 0.8768 | 1.0099 | 0.0576 |
| TMEM166    | 0.9416 | 1.0740 | 1.0767 | 0.9473 | 1.0099 | 0.0378 |
| TSHZ2      | 0.9641 | 1.0146 | 1.0859 | 0.9750 | 1.0099 | 0.0276 |
| XAGE3      | 0.9853 | 1.0316 | 1.0963 | 0.9264 | 1.0099 | 0.0360 |
| TXK        | 0.9665 | 1.0675 | 1.0822 | 0.9234 | 1.0099 | 0.0386 |
| TTL3       | 0.9749 | 1.2619 | 0.9699 | 0.8330 | 1.0099 | 0.0902 |
| IFT140     | 0.9433 | 1.1063 | 1.0403 | 0.9498 | 1.0099 | 0.0390 |
| IL2RG      | 0.9393 | 1.0698 | 1.0447 | 0.9859 | 1.0099 | 0.0294 |
| RIN2       | 1.1032 | 1.0152 | 1.0295 | 0.8920 | 1.0100 | 0.0438 |
| LOC644826  | 1.0602 | 1.1218 | 1.0285 | 0.8293 | 1.0100 | 0.0633 |
| GNASAS     | 0.9650 | 1.0188 | 1.1890 | 0.8671 | 1.0100 | 0.0674 |
| AK7        | 0.9893 | 1.1446 | 1.0015 | 0.9045 | 1.0100 | 0.0498 |
| INSL4      | 0.9193 | 1.1301 | 1.1034 | 0.8871 | 1.0100 | 0.0622 |
| FOXD4L6    | 1.0121 | 1.1270 | 0.9924 | 0.9083 | 1.0100 | 0.0451 |
| LOC1001340 | 0.6911 | 1.0687 | 1.1071 | 1.1729 | 1.0100 | 0.1084 |
| IGSF21     | 0.9467 | 1.1221 | 1.0365 | 0.9346 | 1.0100 | 0.0438 |
| ARHGDI8    | 0.8706 | 1.0434 | 1.0930 | 1.0329 | 1.0100 | 0.0483 |
| LOC648668  | 1.0241 | 1.0163 | 0.9925 | 1.0070 | 1.0100 | 0.0068 |
| LOC653618  | 0.9003 | 1.1376 | 1.0614 | 0.9407 | 1.0100 | 0.0546 |
| NUMA1      | 1.0553 | 1.4919 | 0.8453 | 0.6475 | 1.0100 | 0.1809 |



|            |        |        |        |        |        |        |
|------------|--------|--------|--------|--------|--------|--------|
| LOC1001338 | 0.8857 | 1.5322 | 0.8902 | 0.7319 | 1.0100 | 0.1779 |
| RPA4       | 0.9433 | 1.3030 | 0.9519 | 0.8418 | 1.0100 | 0.1008 |
| ABCB1      | 0.9451 | 1.0050 | 1.1657 | 0.9242 | 1.0100 | 0.0546 |
| LOC643468  | 0.9172 | 1.1138 | 0.9807 | 1.0283 | 1.0100 | 0.0414 |
| LOC441958  | 0.9568 | 1.1189 | 0.9579 | 1.0064 | 1.0100 | 0.0381 |
| CHRDL1     | 0.9388 | 1.0482 | 1.0902 | 0.9630 | 1.0100 | 0.0355 |
| LOC1001332 | 0.6758 | 1.7458 | 1.0576 | 0.5609 | 1.0100 | 0.2673 |
| CCL1       | 0.9473 | 1.1748 | 0.9875 | 0.9306 | 1.0100 | 0.0562 |
| MGC21881   | 1.0022 | 1.1174 | 1.0970 | 0.8236 | 1.0100 | 0.0670 |
| LOC645468  | 0.9949 | 1.0547 | 1.0071 | 0.9834 | 1.0100 | 0.0157 |
| MSTN       | 0.9097 | 1.1666 | 0.9991 | 0.9647 | 1.0100 | 0.0554 |
| LOC1001295 | 0.9539 | 1.1979 | 0.9937 | 0.8947 | 1.0100 | 0.0658 |
| LOC729379  | 1.0458 | 1.0353 | 1.0948 | 0.8643 | 1.0101 | 0.0503 |
| LYG1       | 0.9110 | 1.1891 | 1.0197 | 0.9203 | 1.0101 | 0.0646 |
| MANBA      | 0.8164 | 1.4394 | 1.1636 | 0.6208 | 1.0101 | 0.1819 |
| GSDMD      | 1.0276 | 1.0924 | 1.0510 | 0.8693 | 1.0101 | 0.0488 |
| PRAMEF16   | 0.9640 | 1.0565 | 1.0264 | 0.9934 | 1.0101 | 0.0201 |
| LOC644048  | 0.9697 | 1.0417 | 1.1002 | 0.9288 | 1.0101 | 0.0380 |
| PTGER2     | 0.9991 | 1.1218 | 0.9929 | 0.9265 | 1.0101 | 0.0407 |
| VPREB1     | 0.9993 | 1.1110 | 1.0390 | 0.8910 | 1.0101 | 0.0460 |
| LOC650144  | 0.8570 | 1.1989 | 1.0016 | 0.9828 | 1.0101 | 0.0707 |
| LOC646050  | 1.0941 | 1.0480 | 0.9249 | 0.9734 | 1.0101 | 0.0378 |
| VWA5A      | 1.0408 | 1.2405 | 1.0079 | 0.7513 | 1.0101 | 0.1004 |
| EMR3       | 1.0188 | 1.0365 | 1.0973 | 0.8878 | 1.0101 | 0.0441 |
| FLJ43390   | 0.9815 | 1.1084 | 1.0322 | 0.9184 | 1.0101 | 0.0402 |
| LOC1001331 | 0.9824 | 1.1456 | 1.0260 | 0.8864 | 1.0101 | 0.0538 |
| LOC646041  | 0.9605 | 1.0889 | 1.0463 | 0.9447 | 1.0101 | 0.0345 |
| TDRD7      | 1.0480 | 1.2944 | 1.0300 | 0.6681 | 1.0101 | 0.1290 |
| LOC730760  | 0.9440 | 0.9974 | 1.1310 | 0.9682 | 1.0101 | 0.0417 |
| LOC643720  | 0.9205 | 1.1587 | 0.9887 | 0.9726 | 1.0101 | 0.0516 |
| LOC653319  | 0.9786 | 1.1290 | 1.0502 | 0.8828 | 1.0102 | 0.0524 |
| LOC402560  | 0.9977 | 1.0800 | 1.1130 | 0.8499 | 1.0102 | 0.0587 |
| LOC642936  | 0.9878 | 1.0712 | 0.9813 | 1.0004 | 1.0102 | 0.0207 |
| APBA2      | 0.9361 | 1.0591 | 1.1511 | 0.8945 | 1.0102 | 0.0585 |
| OR1S1      | 0.9437 | 1.0807 | 1.0643 | 0.9521 | 1.0102 | 0.0362 |
| MAG11      | 0.9455 | 1.0912 | 1.0594 | 0.9446 | 1.0102 | 0.0382 |
| C4orf45    | 1.0147 | 1.0328 | 1.0158 | 0.9774 | 1.0102 | 0.0117 |
| LOC650556  | 1.1197 | 1.0405 | 0.9788 | 0.9020 | 1.0102 | 0.0462 |
| HLA-DRB3   | 0.9433 | 1.2059 | 1.0494 | 0.8423 | 1.0102 | 0.0777 |
| LOC647193  | 0.9243 | 1.1347 | 1.0390 | 0.9428 | 1.0102 | 0.0485 |
| TMEM170A   | 0.7985 | 1.4762 | 0.9964 | 0.7698 | 1.0102 | 0.1633 |
| RBM12B     | 0.8757 | 1.2281 | 1.1761 | 0.7610 | 1.0102 | 0.1137 |
| LOC642528  | 0.8413 | 1.1772 | 1.0202 | 1.0022 | 1.0102 | 0.0687 |
| TLX1NB     | 0.9737 | 1.1542 | 1.0441 | 0.8690 | 1.0103 | 0.0600 |
| HSPA12B    | 1.0071 | 1.1002 | 1.0642 | 0.8695 | 1.0103 | 0.0507 |
| LOC1001286 | 0.9299 | 1.0559 | 1.0872 | 0.9680 | 1.0103 | 0.0368 |

|            |        |        |        |        |        |        |
|------------|--------|--------|--------|--------|--------|--------|
| LOC1001281 | 0.9202 | 1.1598 | 1.0293 | 0.9317 | 1.0103 | 0.0555 |
| APC        | 1.0262 | 1.0592 | 1.0389 | 0.9168 | 1.0103 | 0.0319 |
| ZNF625     | 0.8724 | 1.1261 | 1.1669 | 0.8757 | 1.0103 | 0.0791 |
| RAB39      | 0.9737 | 1.1302 | 1.0376 | 0.8997 | 1.0103 | 0.0489 |
| LOC643467  | 1.0023 | 1.0986 | 0.9649 | 0.9754 | 1.0103 | 0.0305 |
| HLA-DRB4   | 0.9584 | 1.1631 | 1.0651 | 0.8546 | 1.0103 | 0.0666 |
| ZNF107     | 0.9914 | 1.0742 | 1.0420 | 0.9337 | 1.0103 | 0.0307 |
| LOC1001308 | 0.9349 | 1.1529 | 1.0795 | 0.8740 | 1.0103 | 0.0642 |
| FAM166B    | 0.9286 | 1.2977 | 1.0255 | 0.7895 | 1.0103 | 0.1074 |
| BMP15      | 0.9452 | 1.0501 | 1.1000 | 0.9460 | 1.0103 | 0.0387 |
| LOC1001308 | 0.9306 | 1.0361 | 1.0601 | 1.0145 | 1.0103 | 0.0282 |
| LOC649021  | 0.9908 | 1.0382 | 1.0608 | 0.9516 | 1.0103 | 0.0244 |
| APCDD1     | 0.9600 | 1.1367 | 1.1040 | 0.8407 | 1.0104 | 0.0683 |
| FGF22      | 0.9642 | 1.0530 | 1.1136 | 0.9106 | 1.0104 | 0.0452 |
| CLCA4      | 1.0277 | 1.0928 | 1.0364 | 0.8845 | 1.0104 | 0.0444 |
| ERVWE1     | 0.9958 | 1.1465 | 0.9722 | 0.9268 | 1.0104 | 0.0476 |
| LOC729799  | 0.9549 | 1.1614 | 1.0825 | 0.8427 | 1.0104 | 0.0702 |
| LOC648897  | 0.8321 | 1.0814 | 1.0922 | 1.0358 | 1.0104 | 0.0607 |
| PFKFB2     | 0.9609 | 1.2846 | 0.9869 | 0.8091 | 1.0104 | 0.0995 |
| DCLK2      | 0.9803 | 1.1225 | 1.0343 | 0.9043 | 1.0104 | 0.0459 |
| LOC1001300 | 1.0565 | 0.9765 | 1.0771 | 0.9314 | 1.0104 | 0.0341 |
| BLNK       | 1.0350 | 1.0617 | 1.0410 | 0.9039 | 1.0104 | 0.0360 |
| FLJ35220   | 0.9769 | 1.1696 | 0.9606 | 0.9343 | 1.0104 | 0.0538 |
| LOC392843  | 0.9329 | 1.1735 | 1.0419 | 0.8933 | 1.0104 | 0.0628 |
| MIR548F2   | 0.9251 | 1.0034 | 1.0687 | 1.0444 | 1.0104 | 0.0315 |
| LOC729694  | 1.0717 | 0.9631 | 1.0316 | 0.9751 | 1.0104 | 0.0253 |
| ZNF385A    | 1.0012 | 1.1734 | 1.0468 | 0.8202 | 1.0104 | 0.0731 |
| MIA2       | 0.9169 | 1.1468 | 0.9564 | 1.0216 | 1.0104 | 0.0503 |
| ITGB1BP2   | 0.8954 | 1.1648 | 1.0928 | 0.8887 | 1.0104 | 0.0699 |
| ODF2L      | 0.9598 | 1.0942 | 1.0814 | 0.9063 | 1.0104 | 0.0461 |
| CMYA3      | 0.9347 | 1.1381 | 1.0631 | 0.9058 | 1.0104 | 0.0546 |
| LOC1001289 | 0.8360 | 1.1313 | 1.1972 | 0.8772 | 1.0104 | 0.0902 |
| GGN        | 0.9318 | 1.1458 | 0.9994 | 0.9648 | 1.0104 | 0.0472 |
| TMEM83     | 0.9707 | 1.1160 | 1.0390 | 0.9161 | 1.0104 | 0.0432 |
| SNORD58C   | 1.0460 | 1.0610 | 1.0717 | 0.8631 | 1.0105 | 0.0494 |
| KIR3DX1    | 0.9716 | 1.0850 | 1.0377 | 0.9475 | 1.0105 | 0.0313 |
| FLJ31132   | 0.8662 | 1.1172 | 1.0907 | 0.9678 | 1.0105 | 0.0581 |
| LOC1001335 | 0.9463 | 1.1503 | 1.0020 | 0.9433 | 1.0105 | 0.0485 |
| PSCA       | 1.0014 | 1.1065 | 1.0666 | 0.8674 | 1.0105 | 0.0524 |
| DNAJB5     | 0.9133 | 1.2144 | 1.0417 | 0.8724 | 1.0105 | 0.0770 |
| SMPD3      | 0.9945 | 1.0594 | 1.0564 | 0.9315 | 1.0105 | 0.0303 |
| LOC1001335 | 0.9810 | 1.0461 | 1.0980 | 0.9168 | 1.0105 | 0.0393 |
| RBMV2EP    | 0.9147 | 1.1243 | 0.9864 | 1.0165 | 1.0105 | 0.0435 |
| C1orf165   | 1.0472 | 1.0945 | 1.0397 | 0.8605 | 1.0105 | 0.0514 |
| TXNDC2     | 0.9399 | 1.0918 | 1.0615 | 0.9488 | 1.0105 | 0.0387 |
| GPR151     | 1.0571 | 1.0997 | 0.9899 | 0.8953 | 1.0105 | 0.0445 |

|            |        |        |        |        |        |        |
|------------|--------|--------|--------|--------|--------|--------|
| FLJ32679   | 0.9479 | 1.0673 | 1.0709 | 0.9559 | 1.0105 | 0.0339 |
| PGA4       | 0.9757 | 0.9807 | 1.0961 | 0.9896 | 1.0105 | 0.0287 |
| MIR570     | 0.9116 | 1.1188 | 0.9293 | 1.0824 | 1.0105 | 0.0527 |
| LOC731000  | 0.9705 | 1.0712 | 1.0738 | 0.9266 | 1.0105 | 0.0369 |
| LRRC32     | 0.9681 | 1.1086 | 1.0358 | 0.9296 | 1.0105 | 0.0394 |
| RORC       | 1.0776 | 1.1841 | 0.9484 | 0.8321 | 1.0105 | 0.0766 |
| LPAL2      | 0.9749 | 1.0733 | 1.0476 | 0.9464 | 1.0105 | 0.0298 |
| LOC441098  | 0.9227 | 1.1297 | 1.0871 | 0.9027 | 1.0105 | 0.0573 |
| LOC1001278 | 0.9090 | 1.0618 | 1.1161 | 0.9553 | 1.0105 | 0.0475 |
| DISC1      | 1.0203 | 1.0890 | 1.0248 | 0.9080 | 1.0105 | 0.0376 |
| TRPC3      | 1.0201 | 1.0586 | 1.0867 | 0.8768 | 1.0105 | 0.0466 |
| NTSR1      | 0.9149 | 1.1427 | 1.0398 | 0.9448 | 1.0105 | 0.0515 |
| LOC1001285 | 0.9251 | 1.1035 | 1.0113 | 1.0023 | 1.0106 | 0.0365 |
| FHOD3      | 1.0057 | 1.1808 | 1.0814 | 0.7744 | 1.0106 | 0.0865 |
| LOC389043  | 0.9953 | 1.0995 | 0.9748 | 0.9726 | 1.0106 | 0.0301 |
| MEP1B      | 0.9498 | 1.0883 | 1.0758 | 0.9284 | 1.0106 | 0.0416 |
| RPSA       | 0.8545 | 1.2428 | 1.1923 | 0.7527 | 1.0106 | 0.1217 |
| TSHR       | 0.9959 | 1.1210 | 1.0391 | 0.8863 | 1.0106 | 0.0489 |
| LOC402176  | 0.9409 | 1.1031 | 0.9935 | 1.0050 | 1.0106 | 0.0338 |
| AQP3       | 1.0619 | 1.1297 | 1.0089 | 0.8419 | 1.0106 | 0.0614 |
| KRT74      | 0.8915 | 1.1154 | 1.0433 | 0.9924 | 1.0106 | 0.0471 |
| GPR88      | 0.9999 | 1.0682 | 1.0170 | 0.9575 | 1.0106 | 0.0229 |
| LOC643032  | 0.8986 | 1.2006 | 1.1279 | 0.8155 | 1.0106 | 0.0915 |
| LOC650698  | 0.8697 | 1.0938 | 1.1304 | 0.9488 | 1.0107 | 0.0612 |
| LOC650137  | 0.9659 | 1.1276 | 1.0076 | 0.9414 | 1.0107 | 0.0413 |
| ZNF322B    | 0.9688 | 1.1424 | 0.9508 | 0.9807 | 1.0107 | 0.0443 |
| LOC644612  | 0.9326 | 1.1835 | 1.0643 | 0.8624 | 1.0107 | 0.0712 |
| LOC1001282 | 0.9624 | 1.1897 | 0.9671 | 0.9235 | 1.0107 | 0.0605 |
| GPRC6A     | 0.9499 | 1.1333 | 0.9859 | 0.9736 | 1.0107 | 0.0415 |
| LOC645463  | 0.9911 | 1.1533 | 0.9682 | 0.9302 | 1.0107 | 0.0492 |
| LOC643740  | 0.9203 | 1.1188 | 1.1133 | 0.8904 | 1.0107 | 0.0611 |
| SNORA2A    | 1.0180 | 1.1315 | 1.0262 | 0.8671 | 1.0107 | 0.0544 |
| SLC22A10   | 0.9672 | 1.1338 | 1.0405 | 0.9014 | 1.0107 | 0.0499 |
| OR2L3      | 0.9707 | 1.1489 | 1.0160 | 0.9073 | 1.0107 | 0.0512 |
| LOC649151  | 0.9970 | 1.0718 | 1.0454 | 0.9286 | 1.0107 | 0.0315 |
| LOC649947  | 0.9632 | 1.0713 | 1.1147 | 0.8937 | 1.0107 | 0.0504 |
| LOC642204  | 0.9825 | 1.1659 | 1.0165 | 0.8780 | 1.0107 | 0.0595 |
| ANAPC2     | 0.9463 | 1.1545 | 1.0450 | 0.8971 | 1.0107 | 0.0569 |
| ITGA6      | 0.9304 | 1.1222 | 1.0332 | 0.9571 | 1.0107 | 0.0431 |
| CLEC5A     | 0.9894 | 1.0706 | 0.9801 | 1.0028 | 1.0107 | 0.0205 |
| LOC645929  | 0.9598 | 1.0988 | 1.0538 | 0.9305 | 1.0107 | 0.0394 |
| FLT3LG     | 1.0015 | 1.0468 | 1.0744 | 0.9202 | 1.0107 | 0.0337 |
| LOC646056  | 0.8550 | 1.2172 | 1.0072 | 0.9637 | 1.0108 | 0.0759 |
| LOC644662  | 0.9495 | 1.1176 | 1.0642 | 0.9117 | 1.0108 | 0.0482 |
| LOC651100  | 0.9953 | 1.0668 | 1.0409 | 0.9400 | 1.0108 | 0.0278 |
| MIR362     | 1.0605 | 1.1199 | 0.9646 | 0.8981 | 1.0108 | 0.0493 |

|            |        |        |        |        |        |        |
|------------|--------|--------|--------|--------|--------|--------|
| CYP2B7P1   | 0.9758 | 1.1106 | 0.9987 | 0.9580 | 1.0108 | 0.0343 |
| PIK3R4     | 0.7434 | 1.4656 | 1.0103 | 0.8239 | 1.0108 | 0.1616 |
| WNT2       | 1.0406 | 1.0301 | 1.0660 | 0.9065 | 1.0108 | 0.0356 |
| LOC1001294 | 1.0019 | 1.1692 | 1.0585 | 0.8135 | 1.0108 | 0.0744 |
| LOC613038  | 0.8823 | 1.1321 | 0.9085 | 1.1202 | 1.0108 | 0.0669 |
| ATXN8OS    | 1.0080 | 1.0183 | 1.0108 | 1.0061 | 1.0108 | 0.0027 |
| SLC2A14    | 0.9901 | 1.1444 | 1.0461 | 0.8627 | 1.0108 | 0.0588 |
| TMEM222    | 0.8834 | 1.2810 | 1.0717 | 0.8072 | 1.0108 | 0.1058 |
| GBA3       | 1.0121 | 1.1034 | 1.0436 | 0.8843 | 1.0108 | 0.0462 |
| LILRA1     | 1.0395 | 1.1045 | 0.9737 | 0.9257 | 1.0108 | 0.0390 |
| LOC650342  | 1.1015 | 1.1040 | 0.9502 | 0.8876 | 1.0108 | 0.0546 |
| LOC643958  | 0.9254 | 1.0798 | 1.1429 | 0.8952 | 1.0108 | 0.0598 |
| ZNF18      | 1.0941 | 1.2237 | 0.9460 | 0.7796 | 1.0108 | 0.0957 |
| LOC401507  | 0.9930 | 1.0476 | 1.0054 | 0.9974 | 1.0108 | 0.0125 |
| PRRG3      | 1.0235 | 0.9570 | 1.1598 | 0.9031 | 1.0109 | 0.0554 |
| LOC651921  | 0.8794 | 1.1120 | 1.0381 | 1.0140 | 1.0109 | 0.0485 |
| KLRC1      | 0.9449 | 1.1231 | 1.0745 | 0.9010 | 1.0109 | 0.0525 |
| HOM-TES-10 | 0.9880 | 1.0704 | 1.0774 | 0.9076 | 1.0109 | 0.0399 |
| MYH6       | 0.8264 | 1.1874 | 1.0676 | 0.9621 | 1.0109 | 0.0768 |
| CITED2     | 0.9842 | 1.2497 | 1.0062 | 0.8033 | 1.0109 | 0.0917 |
| FAM22F     | 0.9353 | 1.2722 | 0.9791 | 0.8569 | 1.0109 | 0.0907 |
| TTLL11     | 1.0476 | 1.0279 | 1.0519 | 0.9162 | 1.0109 | 0.0320 |
| CHGA       | 1.0068 | 1.1348 | 1.0126 | 0.8894 | 1.0109 | 0.0501 |
| MIR193A    | 0.9688 | 1.0734 | 1.0508 | 0.9506 | 1.0109 | 0.0301 |
| DLC1       | 0.9250 | 1.0849 | 1.0199 | 1.0139 | 1.0109 | 0.0328 |
| C6orf97    | 0.9810 | 1.1486 | 1.0263 | 0.8877 | 1.0109 | 0.0542 |
| LOC646632  | 0.8899 | 1.2662 | 1.0421 | 0.8455 | 1.0109 | 0.0949 |
| LOC1001339 | 1.0016 | 1.0654 | 0.9481 | 1.0286 | 1.0109 | 0.0247 |
| CABP4      | 0.9435 | 1.0671 | 1.1421 | 0.8910 | 1.0109 | 0.0572 |
| NACA       | 1.0053 | 1.1596 | 1.0877 | 0.7912 | 1.0110 | 0.0797 |
| LOC650830  | 0.9505 | 1.0508 | 1.1559 | 0.8867 | 1.0110 | 0.0590 |
| OBP2A      | 0.9429 | 1.1941 | 0.9984 | 0.9084 | 1.0110 | 0.0638 |
| DNAH2      | 0.8713 | 1.1923 | 1.0221 | 0.9582 | 1.0110 | 0.0679 |
| LOC653189  | 0.8886 | 1.1330 | 1.0756 | 0.9467 | 1.0110 | 0.0564 |
| MIR626     | 1.0009 | 1.0856 | 1.0404 | 0.9170 | 1.0110 | 0.0358 |
| ZSCAN12L1  | 0.9422 | 1.1384 | 1.0719 | 0.8914 | 1.0110 | 0.0570 |
| LOC653652  | 0.9845 | 1.0341 | 1.1634 | 0.8619 | 1.0110 | 0.0624 |
| LOC652763  | 0.8626 | 1.1024 | 1.0430 | 1.0360 | 1.0110 | 0.0516 |
| S1PR5      | 1.0064 | 1.1091 | 1.0798 | 0.8487 | 1.0110 | 0.0583 |
| KIR2DL1    | 1.0133 | 1.0081 | 1.0430 | 0.9796 | 1.0110 | 0.0130 |
| FLJ43752   | 0.9840 | 1.0873 | 1.0466 | 0.9261 | 1.0110 | 0.0354 |
| LOC1001297 | 0.9700 | 1.0070 | 1.1141 | 0.9529 | 1.0110 | 0.0362 |
| LOC651695  | 1.0255 | 1.2199 | 0.9684 | 0.8302 | 1.0110 | 0.0808 |
| CTNND2     | 0.9665 | 1.0672 | 1.0768 | 0.9335 | 1.0110 | 0.0359 |
| PARK2      | 1.0032 | 1.1016 | 1.0619 | 0.8775 | 1.0110 | 0.0489 |
| THSD7B     | 0.9801 | 1.1504 | 1.0167 | 0.8969 | 1.0110 | 0.0528 |

|            |        |        |        |        |        |        |
|------------|--------|--------|--------|--------|--------|--------|
| LOC441730  | 0.9849 | 1.0270 | 1.0388 | 0.9936 | 1.0110 | 0.0130 |
| CX3CR1     | 1.0640 | 1.0870 | 0.9384 | 0.9547 | 1.0110 | 0.0377 |
| MYH15      | 0.9428 | 1.1622 | 1.0726 | 0.8666 | 1.0110 | 0.0659 |
| FAM184B    | 1.0249 | 1.2058 | 0.9064 | 0.9071 | 1.0111 | 0.0706 |
| LOC1001323 | 0.9146 | 1.0756 | 1.1411 | 0.9129 | 1.0111 | 0.0577 |
| FLJ40244   | 0.9689 | 1.1552 | 1.0581 | 0.8620 | 1.0111 | 0.0626 |
| PLA2G2D    | 1.0099 | 1.0877 | 1.0602 | 0.8864 | 1.0111 | 0.0446 |
| SMEK3P     | 0.8914 | 1.1889 | 1.0211 | 0.9428 | 1.0111 | 0.0650 |
| MAFG       | 0.9293 | 1.1718 | 1.0247 | 0.9185 | 1.0111 | 0.0586 |
| LOC727831  | 1.0133 | 1.0413 | 1.0533 | 0.9364 | 1.0111 | 0.0262 |
| LOC1001299 | 1.0130 | 1.0485 | 1.1131 | 0.8697 | 1.0111 | 0.0515 |
| LOC654192  | 0.9764 | 1.1187 | 1.0352 | 0.9140 | 1.0111 | 0.0436 |
| ERCC-00083 | 1.0537 | 1.1229 | 0.9141 | 0.9538 | 1.0111 | 0.0474 |
| LOC650116  | 0.8364 | 1.0826 | 1.1853 | 0.9400 | 1.0111 | 0.0769 |
| LOC644278  | 0.9510 | 1.0807 | 1.0656 | 0.9472 | 1.0111 | 0.0360 |
| C12orf72   | 0.9332 | 1.2451 | 0.9918 | 0.8744 | 1.0111 | 0.0816 |
| MIR128-2   | 1.1538 | 1.0810 | 0.9931 | 0.8166 | 1.0111 | 0.0727 |
| VAV3       | 0.9564 | 1.1584 | 0.9993 | 0.9304 | 1.0111 | 0.0511 |
| LOC650459  | 0.9587 | 1.1551 | 1.0860 | 0.8448 | 1.0111 | 0.0688 |
| LOC646917  | 1.0115 | 1.0182 | 1.1347 | 0.8801 | 1.0111 | 0.0520 |
| MAFB       | 0.8699 | 1.4746 | 0.9314 | 0.7686 | 1.0111 | 0.1581 |
| LOC652396  | 1.0240 | 1.1202 | 0.9133 | 0.9871 | 1.0111 | 0.0430 |
| REV1       | 0.8481 | 1.3857 | 1.0872 | 0.7236 | 1.0111 | 0.1459 |
| KLF17      | 1.0503 | 1.0889 | 0.9642 | 0.9412 | 1.0111 | 0.0350 |
| OR4C16     | 0.9396 | 1.0888 | 1.1017 | 0.9146 | 1.0112 | 0.0489 |
| LMOD1      | 0.8870 | 1.0955 | 1.0532 | 1.0090 | 1.0112 | 0.0450 |
| RAX2       | 1.0198 | 1.1089 | 1.0081 | 0.9080 | 1.0112 | 0.0411 |
| RPL41      | 0.8870 | 1.0912 | 1.1341 | 0.9325 | 1.0112 | 0.0600 |
| GZMA       | 0.9445 | 1.0767 | 1.0123 | 1.0114 | 1.0112 | 0.0270 |
| CDH8       | 1.0402 | 1.0808 | 1.0300 | 0.8939 | 1.0112 | 0.0406 |
| LOC654155  | 0.9976 | 1.3782 | 0.8755 | 0.7936 | 1.0112 | 0.1293 |
| NCALD      | 0.9545 | 1.1130 | 1.0673 | 0.9102 | 1.0112 | 0.0474 |
| KRT12      | 1.0003 | 1.1668 | 0.9324 | 0.9454 | 1.0112 | 0.0539 |
| ADCY10     | 1.0211 | 1.0038 | 1.0929 | 0.9271 | 1.0112 | 0.0340 |
| INS-IGF2   | 0.9375 | 1.1367 | 1.0072 | 0.9636 | 1.0112 | 0.0442 |
| LOC649749  | 0.9267 | 0.9498 | 1.1934 | 0.9751 | 1.0112 | 0.0615 |
| PPP1R12A   | 1.0828 | 1.1918 | 1.0235 | 0.7470 | 1.0112 | 0.0947 |
| VGLL2      | 0.9335 | 1.0917 | 1.0857 | 0.9342 | 1.0112 | 0.0447 |
| LOC650188  | 0.9569 | 1.1074 | 1.0518 | 0.9289 | 1.0113 | 0.0415 |
| CA1        | 0.9706 | 0.9613 | 0.9854 | 1.1278 | 1.0113 | 0.0392 |
| LOC653313  | 1.0888 | 1.1226 | 0.9837 | 0.8499 | 1.0113 | 0.0614 |
| FAM150A    | 1.0258 | 1.0652 | 1.0100 | 0.9441 | 1.0113 | 0.0252 |
| FOXA3      | 0.9008 | 1.1433 | 1.0427 | 0.9584 | 1.0113 | 0.0528 |
| SLC5A12    | 0.9408 | 1.0945 | 1.1005 | 0.9095 | 1.0113 | 0.0502 |
| LOC730144  | 1.0119 | 1.0558 | 0.9963 | 0.9813 | 1.0113 | 0.0161 |
| INPPL1     | 1.0595 | 1.4281 | 0.8262 | 0.7314 | 1.0113 | 0.1551 |

|            |        |        |        |        |        |        |
|------------|--------|--------|--------|--------|--------|--------|
| TMEM92     | 0.9393 | 1.1211 | 0.9809 | 1.0039 | 1.0113 | 0.0390 |
| ERCC-00009 | 1.0830 | 1.0219 | 1.0314 | 0.9089 | 1.0113 | 0.0367 |
| KIAA1467   | 0.8015 | 1.2919 | 1.1181 | 0.8339 | 1.0113 | 0.1175 |
| TOP        | 0.9955 | 1.1440 | 1.0150 | 0.8908 | 1.0113 | 0.0519 |
| LOC1001321 | 0.8790 | 1.1415 | 1.0878 | 0.9370 | 1.0113 | 0.0618 |
| FAM179A    | 0.8922 | 1.1996 | 1.0632 | 0.8903 | 1.0113 | 0.0747 |
| VPS26A     | 0.9602 | 1.4308 | 0.9417 | 0.7126 | 1.0113 | 0.1507 |
| LOC388381  | 0.8112 | 1.1966 | 1.1988 | 0.8388 | 1.0113 | 0.1077 |
| C2orf27B   | 0.9197 | 1.0754 | 1.0338 | 1.0164 | 1.0113 | 0.0329 |
| CHST7      | 0.8214 | 1.1387 | 1.1667 | 0.9186 | 1.0113 | 0.0842 |
| LOC643714  | 1.0657 | 1.0136 | 1.0025 | 0.9636 | 1.0113 | 0.0211 |
| LOC1001345 | 0.9427 | 1.0626 | 1.0765 | 0.9637 | 1.0113 | 0.0340 |
| MTERFD2    | 0.9482 | 1.1773 | 0.9912 | 0.9288 | 1.0114 | 0.0568 |
| DUSP27     | 0.9424 | 1.2695 | 0.9812 | 0.8523 | 1.0114 | 0.0902 |
| LOC651923  | 0.8974 | 1.2261 | 0.9856 | 0.9364 | 1.0114 | 0.0738 |
| LOC402641  | 0.9444 | 1.1343 | 1.0507 | 0.9161 | 1.0114 | 0.0502 |
| CCR3       | 0.9948 | 1.0714 | 0.9994 | 0.9800 | 1.0114 | 0.0204 |
| CRYBA1     | 0.9462 | 1.0692 | 1.0430 | 0.9872 | 1.0114 | 0.0276 |
| MCM9       | 0.8753 | 1.1631 | 1.0592 | 0.9480 | 1.0114 | 0.0631 |
| LOC1001304 | 0.9699 | 1.0499 | 1.0598 | 0.9660 | 1.0114 | 0.0252 |
| LOC647348  | 0.9783 | 1.1223 | 1.0851 | 0.8600 | 1.0114 | 0.0590 |
| LOC646178  | 0.9698 | 1.2482 | 1.0014 | 0.8263 | 1.0114 | 0.0876 |
| NPTXR      | 1.0863 | 1.0716 | 0.9750 | 0.9129 | 1.0114 | 0.0411 |
| MMP2       | 1.0071 | 1.1443 | 1.0227 | 0.8717 | 1.0114 | 0.0558 |
| LOC644571  | 0.9638 | 1.1142 | 0.9386 | 1.0291 | 1.0115 | 0.0392 |
| SYNPO      | 0.8678 | 1.0944 | 1.1606 | 0.9231 | 1.0115 | 0.0693 |
| TRHR       | 0.9332 | 1.1551 | 1.0613 | 0.8963 | 1.0115 | 0.0595 |
| LOC652101  | 0.9095 | 1.1922 | 1.0895 | 0.8548 | 1.0115 | 0.0784 |
| LOC650458  | 0.9972 | 1.2348 | 0.9126 | 0.9013 | 1.0115 | 0.0774 |
| FAM158A    | 0.9082 | 1.3552 | 1.1158 | 0.6667 | 1.0115 | 0.1468 |
| ZKSCAN4    | 0.9652 | 1.3791 | 1.0041 | 0.6975 | 1.0115 | 0.1402 |
| DYDC1      | 0.9569 | 1.1071 | 1.0741 | 0.9079 | 1.0115 | 0.0472 |
| SIAE       | 0.9645 | 1.0628 | 1.1129 | 0.9059 | 1.0115 | 0.0468 |
| AKAP6      | 0.9137 | 1.1741 | 1.0506 | 0.9077 | 1.0115 | 0.0634 |
| LOC402679  | 0.8846 | 1.1726 | 0.9380 | 1.0510 | 1.0115 | 0.0639 |
| LOC649455  | 0.9008 | 1.2119 | 1.0303 | 0.9032 | 1.0115 | 0.0733 |
| MCMDC1     | 0.9423 | 1.1057 | 1.0395 | 0.9587 | 1.0116 | 0.0379 |
| LOC648907  | 0.9506 | 1.1807 | 0.9967 | 0.9183 | 1.0116 | 0.0586 |
| LOC644243  | 0.9804 | 1.0692 | 1.0803 | 0.9163 | 1.0116 | 0.0388 |
| LOC652367  | 1.0467 | 1.1206 | 0.9895 | 0.8895 | 1.0116 | 0.0487 |
| LOC440105  | 0.8916 | 1.0263 | 1.1839 | 0.9446 | 1.0116 | 0.0638 |
| RPL17      | 0.9707 | 1.1647 | 1.0282 | 0.8827 | 1.0116 | 0.0592 |
| BTNL9      | 0.9273 | 1.0465 | 1.1219 | 0.9507 | 1.0116 | 0.0449 |
| ART1       | 0.9369 | 1.1247 | 1.0842 | 0.9006 | 1.0116 | 0.0548 |
| LOC649712  | 0.8819 | 1.1565 | 0.9907 | 1.0174 | 1.0116 | 0.0565 |
| SPINK5L3   | 1.0096 | 1.1299 | 1.0186 | 0.8883 | 1.0116 | 0.0494 |

|            |        |        |        |        |        |        |
|------------|--------|--------|--------|--------|--------|--------|
| WFDC1      | 0.9609 | 1.0348 | 1.0840 | 0.9669 | 1.0116 | 0.0294 |
| LOC648576  | 1.0594 | 1.1475 | 0.9771 | 0.8624 | 1.0116 | 0.0607 |
| LOC1001283 | 1.0728 | 1.0751 | 1.0370 | 0.8616 | 1.0116 | 0.0508 |
| SLC34A1    | 0.9831 | 1.2606 | 0.9383 | 0.8644 | 1.0116 | 0.0865 |
| GPATCH1    | 0.8969 | 1.3178 | 0.9974 | 0.8345 | 1.0116 | 0.1074 |
| LOC653425  | 1.0386 | 1.0923 | 1.0100 | 0.9055 | 1.0116 | 0.0393 |
| NELL2      | 0.9887 | 1.0328 | 1.0323 | 0.9928 | 1.0116 | 0.0121 |
| THBS1      | 0.9989 | 1.0211 | 1.0227 | 1.0038 | 1.0116 | 0.0060 |
| C14orf184  | 0.8825 | 1.0842 | 1.1004 | 0.9794 | 1.0116 | 0.0507 |
| LOC1001286 | 0.9844 | 1.0761 | 1.0562 | 0.9298 | 1.0116 | 0.0336 |
| BAHCC1     | 0.9736 | 1.0731 | 1.0586 | 0.9415 | 1.0117 | 0.0321 |
| LOC650889  | 1.0514 | 1.2126 | 1.0283 | 0.7544 | 1.0117 | 0.0950 |
| CXCL12     | 1.0104 | 1.0784 | 1.0332 | 0.9248 | 1.0117 | 0.0322 |
| WDFY4      | 0.9808 | 1.1717 | 0.9491 | 0.9452 | 1.0117 | 0.0539 |
| SBDS       | 0.7986 | 1.1367 | 1.3054 | 0.8061 | 1.0117 | 0.1257 |
| LOC1001290 | 0.8676 | 1.1319 | 1.0543 | 0.9930 | 1.0117 | 0.0558 |
| MNX1       | 1.0296 | 1.2485 | 0.8951 | 0.8735 | 1.0117 | 0.0862 |
| LOC648612  | 1.0288 | 1.0790 | 1.0738 | 0.8652 | 1.0117 | 0.0501 |
| OR4Q3      | 0.8733 | 1.1434 | 1.1171 | 0.9130 | 1.0117 | 0.0691 |
| LOC729135  | 1.0701 | 1.1952 | 0.9943 | 0.7872 | 1.0117 | 0.0855 |
| PCTK2      | 0.9229 | 1.1432 | 1.1353 | 0.8454 | 1.0117 | 0.0753 |
| DNAJB12    | 0.9173 | 1.3205 | 1.0204 | 0.7886 | 1.0117 | 0.1133 |
| SECISBP2   | 0.9691 | 1.3206 | 0.9924 | 0.7649 | 1.0117 | 0.1149 |
| CDRT15P    | 0.9048 | 1.1471 | 1.0758 | 0.9193 | 1.0117 | 0.0594 |
| CRISPLD1   | 0.9374 | 1.0809 | 1.0696 | 0.9591 | 1.0117 | 0.0370 |
| LOC1001304 | 0.9872 | 1.1014 | 1.0552 | 0.9032 | 1.0117 | 0.0431 |
| KRTAP19-4  | 1.0454 | 1.0397 | 0.9970 | 0.9649 | 1.0118 | 0.0190 |
| XAF1       | 0.8256 | 1.0980 | 1.2164 | 0.9071 | 1.0118 | 0.0889 |
| ARPM2      | 0.9813 | 1.0785 | 1.0831 | 0.9042 | 1.0118 | 0.0429 |
| MGC19604   | 0.9285 | 1.1131 | 1.0621 | 0.9433 | 1.0118 | 0.0451 |
| REC8       | 0.9854 | 1.1362 | 1.0101 | 0.9154 | 1.0118 | 0.0461 |
| LOC651987  | 0.9686 | 1.1163 | 0.9881 | 0.9742 | 1.0118 | 0.0351 |
| ERCC-00053 | 0.9680 | 1.0541 | 1.0153 | 1.0098 | 1.0118 | 0.0176 |
| LOC653082  | 1.0391 | 1.1277 | 1.0490 | 0.8315 | 1.0118 | 0.0633 |
| FLJ27243   | 0.8728 | 1.1950 | 0.9632 | 1.0163 | 1.0118 | 0.0679 |
| LOC728500  | 0.9875 | 1.1841 | 0.9414 | 0.9342 | 1.0118 | 0.0586 |
| OR5M3      | 0.9301 | 1.1075 | 1.0455 | 0.9642 | 1.0118 | 0.0401 |
| GIPR       | 0.9986 | 1.0163 | 1.0134 | 1.0189 | 1.0118 | 0.0046 |
| NICN1      | 0.8104 | 1.4005 | 1.1182 | 0.7182 | 1.0118 | 0.1552 |
| NCRNA00086 | 1.0831 | 1.0461 | 0.9323 | 0.9858 | 1.0118 | 0.0332 |
| PLIN2      | 0.9249 | 1.1532 | 1.0139 | 0.9553 | 1.0118 | 0.0506 |
| UGT1A5     | 0.9784 | 1.1090 | 1.0738 | 0.8862 | 1.0118 | 0.0502 |
| ADNP2      | 0.8381 | 1.3406 | 1.2250 | 0.6438 | 1.0119 | 0.1631 |
| STMN2      | 0.9014 | 1.1146 | 1.0793 | 0.9522 | 1.0119 | 0.0507 |
| MAML3      | 0.9989 | 1.0564 | 1.0184 | 0.9739 | 1.0119 | 0.0174 |
| LOC647960  | 1.0226 | 1.0472 | 1.0434 | 0.9344 | 1.0119 | 0.0264 |

|            |        |        |        |        |        |        |
|------------|--------|--------|--------|--------|--------|--------|
| LOC388849  | 0.9169 | 1.1710 | 1.0472 | 0.9125 | 1.0119 | 0.0616 |
| BTA1F1     | 0.9110 | 1.2831 | 1.0417 | 0.8119 | 1.0119 | 0.1019 |
| SRGAP2L    | 0.9001 | 1.0901 | 1.1847 | 0.8728 | 1.0119 | 0.0752 |
| FLJ36166   | 1.0620 | 1.0917 | 0.9972 | 0.8969 | 1.0119 | 0.0431 |
| LOC647336  | 1.0295 | 0.9942 | 1.0707 | 0.9534 | 1.0119 | 0.0250 |
| RPLP2      | 0.9793 | 1.1206 | 1.0700 | 0.8779 | 1.0120 | 0.0534 |
| LOC1001323 | 1.0323 | 1.1363 | 0.9390 | 0.9403 | 1.0120 | 0.0468 |
| FLJ43276   | 1.0085 | 1.1212 | 1.0618 | 0.8564 | 1.0120 | 0.0567 |
| LOC646629  | 0.9899 | 0.9968 | 1.0582 | 1.0030 | 1.0120 | 0.0157 |
| VN1R2      | 1.0064 | 1.0210 | 1.0254 | 0.9951 | 1.0120 | 0.0069 |
| LOC653980  | 0.9449 | 1.1283 | 1.0348 | 0.9399 | 1.0120 | 0.0445 |
| TBK1       | 0.9069 | 1.4535 | 0.8977 | 0.7898 | 1.0120 | 0.1496 |
| LOC649632  | 0.9720 | 1.0879 | 0.9889 | 0.9992 | 1.0120 | 0.0259 |
| TECTA      | 1.0338 | 1.0457 | 1.0249 | 0.9436 | 1.0120 | 0.0232 |
| RPS14      | 0.9453 | 1.2585 | 1.0657 | 0.7785 | 1.0120 | 0.1011 |
| MDH1       | 0.8436 | 1.5726 | 0.9682 | 0.6636 | 1.0120 | 0.1971 |
| LOC643923  | 1.0036 | 1.0063 | 1.0545 | 0.9837 | 1.0120 | 0.0150 |
| CPA2       | 0.9533 | 1.0980 | 1.1563 | 0.8406 | 1.0120 | 0.0713 |
| LOC648596  | 0.9138 | 1.1065 | 1.1309 | 0.8971 | 1.0121 | 0.0618 |
| SYT14      | 1.0450 | 1.1898 | 1.0256 | 0.7879 | 1.0121 | 0.0832 |
| LOC1001293 | 0.9249 | 1.1123 | 1.0460 | 0.9652 | 1.0121 | 0.0418 |
| LOC652439  | 0.9457 | 1.1146 | 1.0318 | 0.9563 | 1.0121 | 0.0392 |
| ABR        | 1.0165 | 1.3686 | 0.9712 | 0.6921 | 1.0121 | 0.1388 |
| LOC283922  | 0.9616 | 1.1436 | 1.0654 | 0.8779 | 1.0121 | 0.0582 |
| MUC16      | 0.9598 | 1.1426 | 0.9850 | 0.9610 | 1.0121 | 0.0439 |
| LOC1001317 | 1.0847 | 1.0155 | 1.0549 | 0.8934 | 1.0121 | 0.0420 |
| OR4A16     | 1.0497 | 1.1106 | 1.0357 | 0.8525 | 1.0121 | 0.0556 |
| MIR30D     | 0.9715 | 1.0593 | 1.1021 | 0.9156 | 1.0121 | 0.0421 |
| LOC285908  | 0.9569 | 1.2175 | 0.9637 | 0.9104 | 1.0121 | 0.0695 |
| SP140      | 1.0702 | 1.0775 | 0.9674 | 0.9334 | 1.0121 | 0.0363 |
| ACSM2A     | 0.9411 | 1.1174 | 1.0127 | 0.9772 | 1.0121 | 0.0380 |
| LOC644087  | 0.9741 | 1.1577 | 0.9716 | 0.9452 | 1.0121 | 0.0490 |
| KRT26      | 0.9859 | 1.0513 | 1.0507 | 0.9607 | 1.0121 | 0.0230 |
| KLB        | 0.9471 | 1.1113 | 1.0275 | 0.9627 | 1.0121 | 0.0374 |
| NAALADL2   | 0.9977 | 1.0394 | 1.0562 | 0.9552 | 1.0121 | 0.0226 |
| DGKB       | 0.9691 | 1.1458 | 1.1150 | 0.8186 | 1.0121 | 0.0752 |
| C16orf89   | 0.9934 | 1.0999 | 1.0220 | 0.9334 | 1.0122 | 0.0346 |
| TBX19      | 0.9290 | 1.1129 | 1.0749 | 0.9318 | 1.0122 | 0.0478 |
| KRT18P34   | 0.9754 | 1.2077 | 0.9625 | 0.9031 | 1.0122 | 0.0670 |
| SSH1       | 0.9408 | 1.1444 | 1.0371 | 0.9263 | 1.0122 | 0.0505 |
| SOBP       | 0.9290 | 1.2360 | 1.0773 | 0.8064 | 1.0122 | 0.0929 |
| PLCXD2     | 0.9601 | 1.1149 | 1.0510 | 0.9227 | 1.0122 | 0.0436 |
| LCN12      | 0.8829 | 1.1190 | 1.0567 | 0.9901 | 1.0122 | 0.0505 |
| LOC1001334 | 0.8340 | 1.3058 | 1.1298 | 0.7792 | 1.0122 | 0.1245 |
| OR1A1      | 0.9813 | 1.0273 | 1.1361 | 0.9040 | 1.0122 | 0.0485 |
| ADAMTS4    | 0.9076 | 1.0846 | 1.0652 | 0.9914 | 1.0122 | 0.0402 |



|            |        |        |        |        |        |        |
|------------|--------|--------|--------|--------|--------|--------|
| FUT6       | 0.9403 | 1.2177 | 1.0395 | 0.8513 | 1.0122 | 0.0785 |
| SPANXN5    | 1.1011 | 1.0202 | 1.0195 | 0.9080 | 1.0122 | 0.0397 |
| DGAT2      | 0.8964 | 1.1362 | 1.1402 | 0.8760 | 1.0122 | 0.0729 |
| ST20       | 1.0024 | 1.0830 | 0.9892 | 0.9742 | 1.0122 | 0.0243 |
| LOC1001286 | 0.9509 | 1.2069 | 0.9517 | 0.9393 | 1.0122 | 0.0650 |
| SLFN14     | 0.9489 | 1.0719 | 1.1031 | 0.9249 | 1.0122 | 0.0442 |
| LOC729208  | 0.9898 | 1.0519 | 1.2913 | 0.7158 | 1.0122 | 0.1183 |
| SLC17A3    | 0.8728 | 1.1616 | 1.0588 | 0.9558 | 1.0122 | 0.0627 |
| LOC649150  | 1.0430 | 1.0919 | 1.0323 | 0.8818 | 1.0123 | 0.0454 |
| PPARD      | 0.9621 | 1.2105 | 0.9797 | 0.8968 | 1.0123 | 0.0685 |
| CARD11     | 1.0073 | 1.1157 | 1.0219 | 0.9042 | 1.0123 | 0.0433 |
| TIFAB      | 1.0425 | 1.0257 | 1.0683 | 0.9126 | 1.0123 | 0.0344 |
| DMRTA1     | 0.9746 | 0.9638 | 1.1202 | 0.9906 | 1.0123 | 0.0364 |
| MIR659     | 0.9868 | 1.0562 | 1.0666 | 0.9396 | 1.0123 | 0.0300 |
| LOC727721  | 0.8286 | 1.2148 | 1.0845 | 0.9214 | 1.0123 | 0.0857 |
| KRTAP13-4  | 1.0080 | 1.0927 | 0.9544 | 0.9940 | 1.0123 | 0.0291 |
| LOC440053  | 0.9728 | 1.0153 | 1.0863 | 0.9748 | 1.0123 | 0.0265 |
| LOC1001341 | 0.9342 | 1.1022 | 1.0693 | 0.9436 | 1.0123 | 0.0430 |
| LOC1001314 | 0.8675 | 1.2494 | 0.9959 | 0.9365 | 1.0123 | 0.0833 |
| LOC727775  | 0.9805 | 1.1663 | 1.0704 | 0.8321 | 1.0123 | 0.0711 |
| OR2H2      | 0.9494 | 1.2218 | 1.0107 | 0.8674 | 1.0123 | 0.0757 |
| C4orf17    | 0.9162 | 1.1311 | 1.0990 | 0.9030 | 1.0123 | 0.0598 |
| OR2Z1      | 0.9197 | 1.2291 | 1.0496 | 0.8510 | 1.0124 | 0.0832 |
| USP6       | 0.9397 | 1.1210 | 1.0910 | 0.8978 | 1.0124 | 0.0551 |
| MYO7B      | 1.0331 | 1.0131 | 0.9753 | 1.0279 | 1.0124 | 0.0130 |
| LOC653421  | 0.9497 | 1.3186 | 0.9763 | 0.8049 | 1.0124 | 0.1088 |
| LOC647322  | 1.0632 | 1.3827 | 0.9075 | 0.6961 | 1.0124 | 0.1445 |
| LOC653316  | 0.8827 | 1.0310 | 1.1058 | 1.0301 | 1.0124 | 0.0467 |
| DAPP1      | 0.8673 | 1.3140 | 1.1114 | 0.7569 | 1.0124 | 0.1249 |
| LOC647928  | 0.9830 | 1.1425 | 0.9406 | 0.9835 | 1.0124 | 0.0445 |
| LOC650548  | 0.9313 | 1.0765 | 1.0577 | 0.9842 | 1.0124 | 0.0336 |
| C5orf60    | 0.8590 | 1.0941 | 1.1291 | 0.9675 | 1.0124 | 0.0618 |
| FGF8       | 1.0035 | 1.0447 | 1.0674 | 0.9341 | 1.0124 | 0.0293 |
| KRTAP13-2  | 0.9558 | 1.0656 | 1.0819 | 0.9465 | 1.0124 | 0.0356 |
| LOC731642  | 0.9848 | 1.0263 | 1.0256 | 1.0130 | 1.0124 | 0.0097 |
| LOC644640  | 1.0322 | 1.1156 | 1.0116 | 0.8904 | 1.0124 | 0.0465 |
| LOC1001327 | 1.0125 | 1.1765 | 1.0336 | 0.8272 | 1.0125 | 0.0717 |
| LOC650193  | 0.9585 | 1.1759 | 1.0311 | 0.8845 | 1.0125 | 0.0621 |
| NAT5       | 0.8593 | 1.5020 | 1.0036 | 0.6849 | 1.0125 | 0.1757 |
| LOC390688  | 1.0433 | 1.0810 | 0.9961 | 0.9296 | 1.0125 | 0.0326 |
| LOC651760  | 0.9615 | 1.0581 | 1.0521 | 0.9783 | 1.0125 | 0.0249 |
| LOC652233  | 0.9838 | 1.0560 | 1.0750 | 0.9351 | 1.0125 | 0.0324 |
| EPHA7      | 1.0474 | 0.9808 | 1.0162 | 1.0057 | 1.0125 | 0.0138 |
| HHIPL1     | 0.9467 | 1.0702 | 1.0763 | 0.9568 | 1.0125 | 0.0352 |
| DNAJC24    | 1.0954 | 1.1837 | 0.9742 | 0.7968 | 1.0125 | 0.0838 |
| PTPRA      | 0.9938 | 1.2618 | 0.9721 | 0.8225 | 1.0125 | 0.0914 |

|            |        |        |        |        |        |        |
|------------|--------|--------|--------|--------|--------|--------|
| LOC1001325 | 0.7122 | 1.1131 | 1.1893 | 1.0356 | 1.0126 | 0.1049 |
| OR2AT4     | 0.9733 | 1.2432 | 0.9687 | 0.8651 | 1.0126 | 0.0808 |
| HMGCLL1    | 0.9749 | 1.1193 | 1.0452 | 0.9108 | 1.0126 | 0.0449 |
| FLJ42220   | 0.8878 | 1.0017 | 1.1300 | 1.0308 | 1.0126 | 0.0498 |
| LOC727884  | 1.0065 | 1.1128 | 0.9552 | 0.9758 | 1.0126 | 0.0350 |
| FLJ35894   | 0.8824 | 1.1428 | 1.0516 | 0.9737 | 1.0126 | 0.0555 |
| CICE       | 0.9319 | 1.2385 | 1.1498 | 0.7303 | 1.0126 | 0.1141 |
| EYA2       | 0.9986 | 1.1210 | 1.0342 | 0.8967 | 1.0126 | 0.0464 |
| DKFZp781N1 | 0.9358 | 1.2032 | 0.9778 | 0.9338 | 1.0126 | 0.0643 |
| RARRES2    | 0.9653 | 1.0798 | 1.1551 | 0.8504 | 1.0127 | 0.0667 |
| PIAS4      | 0.9127 | 1.3440 | 0.9246 | 0.8694 | 1.0127 | 0.1111 |
| FLJ45139   | 0.9907 | 1.1334 | 1.0158 | 0.9108 | 1.0127 | 0.0460 |
| LOC1001316 | 0.9251 | 1.0864 | 1.1477 | 0.8915 | 1.0127 | 0.0619 |
| C1orf62    | 0.9053 | 1.1932 | 1.0246 | 0.9277 | 1.0127 | 0.0655 |
| LOC643346  | 0.9098 | 1.1825 | 1.0105 | 0.9479 | 1.0127 | 0.0603 |
| LOC1001325 | 0.8648 | 1.4574 | 0.9006 | 0.8280 | 1.0127 | 0.1490 |
| LOC645273  | 0.9767 | 1.0234 | 1.0876 | 0.9633 | 1.0127 | 0.0281 |
| TNFSF14    | 0.9928 | 1.1490 | 1.0183 | 0.8910 | 1.0128 | 0.0531 |
| FAM26F     | 0.9352 | 1.3022 | 0.9046 | 0.9091 | 1.0128 | 0.0967 |
| PAGE2B     | 0.8534 | 1.1461 | 1.1088 | 0.9429 | 1.0128 | 0.0691 |
| ALPK2      | 1.0266 | 1.1004 | 0.9840 | 0.9402 | 1.0128 | 0.0341 |
| STRA8      | 0.9443 | 1.0652 | 1.0920 | 0.9499 | 1.0128 | 0.0384 |
| CCDC80     | 0.9654 | 1.1689 | 1.0253 | 0.8918 | 1.0128 | 0.0588 |
| LOC387841  | 0.9283 | 1.2108 | 1.1436 | 0.7686 | 1.0128 | 0.1013 |
| ANKRD47    | 1.0445 | 1.0902 | 1.0921 | 0.8246 | 1.0128 | 0.0637 |
| CAPSL      | 0.9487 | 1.1449 | 1.0219 | 0.9359 | 1.0128 | 0.0479 |
| LOC645953  | 0.9507 | 1.1338 | 1.0365 | 0.9305 | 1.0129 | 0.0464 |
| FLJ45445   | 0.9596 | 1.0949 | 1.0484 | 0.9486 | 1.0129 | 0.0353 |
| SLC13A5    | 1.0097 | 1.0768 | 1.0457 | 0.9194 | 1.0129 | 0.0340 |
| LOC730861  | 1.0107 | 1.0757 | 0.9851 | 0.9801 | 1.0129 | 0.0220 |
| LOC1001333 | 0.9398 | 1.1247 | 1.1081 | 0.8791 | 1.0129 | 0.0611 |
| USP38      | 0.8315 | 1.2758 | 1.2484 | 0.6960 | 1.0129 | 0.1466 |
| SLC28A2    | 0.9953 | 1.1305 | 1.0571 | 0.8687 | 1.0129 | 0.0555 |
| KRT36      | 1.0144 | 1.1218 | 0.9860 | 0.9295 | 1.0129 | 0.0403 |
| LOC643614  | 0.9491 | 1.0940 | 1.0601 | 0.9487 | 1.0129 | 0.0376 |
| FABP1      | 0.8645 | 1.1287 | 1.0347 | 1.0239 | 1.0129 | 0.0548 |
| C9orf109   | 0.9235 | 1.1352 | 1.0788 | 0.9143 | 1.0129 | 0.0555 |
| MANSC1     | 0.9470 | 1.3147 | 1.0023 | 0.7878 | 1.0129 | 0.1104 |
| LOC646549  | 0.8840 | 1.1957 | 1.0275 | 0.9447 | 1.0130 | 0.0676 |
| GNB2L1     | 0.8864 | 1.1263 | 1.1373 | 0.9019 | 1.0130 | 0.0687 |
| FLJ10324   | 1.0992 | 1.0602 | 0.9887 | 0.9037 | 1.0130 | 0.0430 |
| NBLA00301  | 0.9701 | 1.2301 | 0.9918 | 0.8599 | 1.0130 | 0.0779 |
| LOC646543  | 0.9417 | 1.0886 | 1.0935 | 0.9280 | 1.0130 | 0.0452 |
| MIR1976    | 0.9763 | 1.0614 | 0.9972 | 1.0170 | 1.0130 | 0.0181 |
| LOC642414  | 0.9805 | 1.1421 | 1.0200 | 0.9093 | 1.0130 | 0.0488 |
| ZNF558     | 0.8674 | 1.2665 | 1.1000 | 0.8180 | 1.0130 | 0.1045 |

|            |        |        |        |        |        |        |
|------------|--------|--------|--------|--------|--------|--------|
| MIR1262    | 0.9550 | 1.1327 | 1.0768 | 0.8876 | 1.0130 | 0.0559 |
| LOC728216  | 1.0743 | 1.1027 | 0.9946 | 0.8805 | 1.0130 | 0.0498 |
| PRDM13     | 0.9486 | 0.9742 | 1.2093 | 0.9200 | 1.0130 | 0.0664 |
| LOC653097  | 1.0683 | 1.0342 | 1.0627 | 0.8869 | 1.0130 | 0.0427 |
| ZBTB43     | 0.9376 | 1.2807 | 0.9622 | 0.8716 | 1.0130 | 0.0912 |
| SRPX2      | 0.9561 | 1.1532 | 0.9676 | 0.9753 | 1.0130 | 0.0469 |
| PAGE5      | 0.9267 | 1.0756 | 1.0792 | 0.9707 | 1.0131 | 0.0382 |
| RND3       | 1.0074 | 1.0380 | 1.0196 | 0.9872 | 1.0131 | 0.0107 |
| LOC1001308 | 1.1255 | 1.0343 | 1.1185 | 0.7740 | 1.0131 | 0.0824 |
| SLC2A8     | 0.8454 | 1.5693 | 0.8248 | 0.8128 | 1.0131 | 0.1855 |
| OR51E2     | 0.9715 | 1.1739 | 0.9771 | 0.9298 | 1.0131 | 0.0546 |
| FMO4       | 0.9608 | 1.2769 | 1.0191 | 0.7955 | 1.0131 | 0.0999 |
| MIR886     | 0.9482 | 1.1145 | 1.0287 | 0.9609 | 1.0131 | 0.0381 |
| LILRB1     | 0.8868 | 1.4660 | 0.9634 | 0.7361 | 1.0131 | 0.1582 |
| ZC3H12B    | 1.0669 | 0.9656 | 1.0904 | 0.9293 | 1.0131 | 0.0389 |
| PBOV1      | 0.9473 | 1.0508 | 1.0530 | 1.0013 | 1.0131 | 0.0250 |
| C2orf57    | 1.0030 | 1.1153 | 0.9966 | 0.9374 | 1.0131 | 0.0371 |
| FMO3       | 0.9879 | 1.0643 | 1.0591 | 0.9409 | 1.0131 | 0.0297 |
| KIAA0495   | 0.8382 | 1.3758 | 0.9721 | 0.8663 | 1.0131 | 0.1243 |
| LOC732040  | 1.0532 | 0.9654 | 1.0602 | 0.9736 | 1.0131 | 0.0253 |
| AGC1       | 0.9550 | 1.0900 | 1.0912 | 0.9162 | 1.0131 | 0.0454 |
| LOC643652  | 0.9400 | 1.0110 | 1.1010 | 1.0005 | 1.0131 | 0.0332 |
| NFAM1      | 1.0362 | 1.0617 | 1.0299 | 0.9247 | 1.0131 | 0.0303 |
| LOC1001345 | 0.9354 | 1.0819 | 1.1335 | 0.9018 | 1.0131 | 0.0560 |
| RWDD2A     | 0.9591 | 1.3484 | 1.0486 | 0.6964 | 1.0131 | 0.1345 |
| SLC22A18AS | 1.0105 | 1.1132 | 1.0463 | 0.8826 | 1.0131 | 0.0484 |
| ZNF774     | 0.8709 | 1.1283 | 1.0323 | 1.0211 | 1.0131 | 0.0532 |
| WDR17      | 1.0091 | 1.0708 | 1.0378 | 0.9349 | 1.0131 | 0.0290 |
| OR8B2      | 0.9655 | 1.2007 | 0.9887 | 0.8978 | 1.0132 | 0.0654 |
| MIR9-3     | 0.9879 | 1.0936 | 1.0791 | 0.8921 | 1.0132 | 0.0466 |
| PPP2R3A    | 0.9764 | 1.1298 | 1.0255 | 0.9210 | 1.0132 | 0.0443 |
| BEGAIN     | 0.9523 | 1.1278 | 1.1271 | 0.8455 | 1.0132 | 0.0695 |
| ANKRD1     | 1.0026 | 1.0976 | 1.0481 | 0.9043 | 1.0132 | 0.0412 |
| ABCD1      | 0.8002 | 1.2801 | 1.1665 | 0.8059 | 1.0132 | 0.1235 |
| LOC642342  | 1.0103 | 1.1408 | 0.9430 | 0.9586 | 1.0132 | 0.0449 |
| TFCP2L1    | 0.9179 | 1.0519 | 1.1361 | 0.9468 | 1.0132 | 0.0501 |
| MIR208A    | 0.9172 | 1.0455 | 1.0334 | 1.0567 | 1.0132 | 0.0324 |
| LOC649948  | 0.9763 | 1.1087 | 1.0056 | 0.9621 | 1.0132 | 0.0331 |
| LOC401242  | 0.8100 | 1.2256 | 1.1288 | 0.8883 | 1.0132 | 0.0980 |
| LOC728800  | 1.0016 | 1.0279 | 1.0817 | 0.9417 | 1.0132 | 0.0291 |
| CLDN1      | 0.8973 | 1.1250 | 1.1087 | 0.9219 | 1.0132 | 0.0601 |
| OR2G6      | 0.9940 | 1.0605 | 1.0469 | 0.9513 | 1.0132 | 0.0251 |
| RPL38      | 0.9290 | 1.0872 | 1.1189 | 0.9177 | 1.0132 | 0.0523 |
| LOC646486  | 1.0267 | 1.1668 | 0.9007 | 0.9586 | 1.0132 | 0.0573 |
| LCE3E      | 1.0173 | 1.1199 | 1.0181 | 0.8976 | 1.0132 | 0.0454 |
| ANGPTL1    | 0.9799 | 1.0262 | 1.0855 | 0.9614 | 1.0132 | 0.0277 |

|            |        |        |        |        |        |        |
|------------|--------|--------|--------|--------|--------|--------|
| LOC1001324 | 1.0506 | 1.1647 | 0.9331 | 0.9045 | 1.0132 | 0.0596 |
| DOCK9      | 0.9736 | 1.1711 | 1.0239 | 0.8844 | 1.0132 | 0.0600 |
| TGFB3      | 0.9598 | 1.0671 | 1.0561 | 0.9700 | 1.0132 | 0.0281 |
| TCF7L1     | 1.0466 | 1.0257 | 1.0252 | 0.9555 | 1.0132 | 0.0199 |
| LRRC8A     | 0.8328 | 1.3241 | 1.1297 | 0.7665 | 1.0133 | 0.1303 |
| FBXO38     | 1.0366 | 1.3332 | 0.9357 | 0.7475 | 1.0133 | 0.1223 |
| OR2M3      | 0.9541 | 1.0471 | 1.0705 | 0.9815 | 1.0133 | 0.0273 |
| PGPEP1     | 0.9827 | 1.1350 | 1.0318 | 0.9037 | 1.0133 | 0.0484 |
| C8orf34    | 0.9291 | 1.0921 | 1.0555 | 0.9764 | 1.0133 | 0.0370 |
| MGC27165   | 0.9583 | 1.1173 | 1.0150 | 0.9626 | 1.0133 | 0.0370 |
| C8orf79    | 0.8938 | 1.1158 | 1.0570 | 0.9865 | 1.0133 | 0.0478 |
| ELTD1      | 0.9466 | 1.1047 | 1.0161 | 0.9858 | 1.0133 | 0.0336 |
| ZNF533     | 0.9929 | 1.1413 | 1.1185 | 0.8005 | 1.0133 | 0.0781 |
| GRXCR1     | 0.9292 | 1.1524 | 1.0071 | 0.9647 | 1.0133 | 0.0490 |
| HHLA3      | 0.9095 | 1.2134 | 1.0411 | 0.8893 | 1.0133 | 0.0747 |
| KRTAP5-4   | 0.9739 | 1.0841 | 0.9370 | 1.0583 | 1.0133 | 0.0346 |
| FBXW5      | 0.8436 | 1.3118 | 0.9686 | 0.9294 | 1.0133 | 0.1029 |
| LOC730086  | 1.0051 | 0.9746 | 1.0739 | 0.9998 | 1.0133 | 0.0212 |
| FLJ31222   | 0.9516 | 1.1730 | 1.0082 | 0.9207 | 1.0133 | 0.0562 |
| LOC1001325 | 0.9012 | 1.3713 | 0.9432 | 0.8377 | 1.0134 | 0.1213 |
| C11orf91   | 0.9914 | 1.1599 | 1.0674 | 0.8347 | 1.0134 | 0.0688 |
| UBE2D1     | 0.9700 | 1.1204 | 0.9884 | 0.9746 | 1.0134 | 0.0359 |
| PASD1      | 0.8996 | 1.1589 | 1.1346 | 0.8603 | 1.0134 | 0.0776 |
| OR2W5      | 1.0169 | 1.1123 | 0.9830 | 0.9413 | 1.0134 | 0.0364 |
| LOC1001338 | 0.9569 | 1.1287 | 1.0481 | 0.9197 | 1.0134 | 0.0470 |
| RPL24      | 0.9489 | 1.1946 | 1.1059 | 0.8041 | 1.0134 | 0.0863 |
| LOC728656  | 0.9741 | 1.1661 | 1.0529 | 0.8604 | 1.0134 | 0.0644 |
| H19        | 0.9157 | 1.1319 | 0.9734 | 1.0325 | 1.0134 | 0.0461 |
| LOC651830  | 0.9637 | 1.0183 | 1.1112 | 0.9603 | 1.0134 | 0.0352 |
| CD6        | 0.8827 | 1.1312 | 1.1146 | 0.9251 | 1.0134 | 0.0639 |
| LOC728093  | 1.0103 | 1.0711 | 1.0454 | 0.9268 | 1.0134 | 0.0314 |
| TMEM211    | 1.0014 | 1.1165 | 1.1048 | 0.8309 | 1.0134 | 0.0661 |
| SYP        | 1.0535 | 1.0366 | 0.9692 | 0.9942 | 1.0134 | 0.0193 |
| C17orf59   | 0.9787 | 1.2405 | 1.0157 | 0.8188 | 1.0134 | 0.0869 |
| CCDC19     | 1.0093 | 1.1207 | 1.0203 | 0.9034 | 1.0134 | 0.0444 |
| HDAC4      | 0.9026 | 1.2301 | 0.9990 | 0.9220 | 1.0134 | 0.0752 |
| LOC729446  | 0.8562 | 1.2413 | 1.0808 | 0.8754 | 1.0134 | 0.0914 |
| LONP2      | 0.8691 | 1.4074 | 1.0326 | 0.7447 | 1.0134 | 0.1439 |
| LOC646803  | 0.9619 | 1.1419 | 1.0371 | 0.9129 | 1.0134 | 0.0499 |
| HYAL3      | 0.9738 | 1.3860 | 0.9120 | 0.7820 | 1.0134 | 0.1305 |
| KRT14      | 0.9229 | 1.1290 | 1.0875 | 0.9144 | 1.0135 | 0.0554 |
| VEZF1      | 0.9964 | 1.2976 | 0.9777 | 0.7821 | 1.0135 | 0.1064 |
| LOC652905  | 1.0850 | 1.0857 | 0.9494 | 0.9336 | 1.0135 | 0.0416 |
| LOC646617  | 0.9531 | 1.1355 | 1.1374 | 0.8278 | 1.0135 | 0.0755 |
| ANKRD58    | 1.0597 | 1.0314 | 1.0267 | 0.9361 | 1.0135 | 0.0268 |
| SUGT1L1    | 0.9547 | 1.2046 | 1.0206 | 0.8739 | 1.0135 | 0.0704 |

|            |        |        |        |        |        |        |
|------------|--------|--------|--------|--------|--------|--------|
| ERCC-00147 | 0.9752 | 0.9986 | 1.0316 | 1.0485 | 1.0135 | 0.0164 |
| LOC645614  | 1.0366 | 1.1257 | 0.9994 | 0.8922 | 1.0135 | 0.0483 |
| HBG2       | 0.9275 | 1.1636 | 1.0335 | 0.9293 | 1.0135 | 0.0558 |
| ATOH1      | 0.9628 | 1.1559 | 0.9900 | 0.9452 | 1.0135 | 0.0484 |
| LOC1001308 | 0.8539 | 1.2363 | 1.0605 | 0.9033 | 1.0135 | 0.0863 |
| ERCC-00150 | 0.9373 | 1.1705 | 1.0156 | 0.9306 | 1.0135 | 0.0558 |
| LCAP       | 0.9163 | 1.1690 | 0.9747 | 0.9941 | 1.0135 | 0.0544 |
| OR10H4     | 1.0113 | 1.1126 | 1.0579 | 0.8724 | 1.0135 | 0.0514 |
| NNMT       | 0.9716 | 1.1664 | 1.0581 | 0.8581 | 1.0136 | 0.0654 |
| GCNT3      | 0.8749 | 1.0399 | 1.0348 | 1.1046 | 1.0136 | 0.0489 |
| LOC653829  | 1.0266 | 1.1047 | 1.0734 | 0.8496 | 1.0136 | 0.0570 |
| PHLDB3     | 0.9649 | 1.0749 | 1.0646 | 0.9499 | 1.0136 | 0.0326 |
| LOC646309  | 0.9056 | 1.0143 | 1.1389 | 0.9957 | 1.0136 | 0.0480 |
| LOC644976  | 0.9005 | 1.1416 | 1.0722 | 0.9401 | 1.0136 | 0.0563 |
| LOC645682  | 0.9192 | 1.0392 | 1.1254 | 0.9707 | 1.0136 | 0.0446 |
| LOC652805  | 0.9225 | 1.1772 | 1.0873 | 0.8675 | 1.0136 | 0.0718 |
| LOC1001336 | 0.9815 | 1.3006 | 0.9049 | 0.8675 | 1.0136 | 0.0986 |
| ACPT       | 0.9387 | 1.2134 | 1.0037 | 0.8988 | 1.0136 | 0.0700 |
| C21orf41   | 0.9966 | 1.0820 | 1.0335 | 0.9425 | 1.0136 | 0.0295 |
| LEAP-2     | 1.0093 | 1.0807 | 0.9989 | 0.9658 | 1.0137 | 0.0242 |
| FZR1       | 0.9057 | 1.2665 | 1.0362 | 0.8464 | 1.0137 | 0.0931 |
| SIRPD      | 0.8262 | 1.1402 | 1.1141 | 0.9742 | 1.0137 | 0.0723 |
| LOC124685  | 1.0401 | 1.0404 | 1.0107 | 0.9635 | 1.0137 | 0.0181 |
| LOC348174  | 0.9317 | 1.0628 | 1.0360 | 1.0243 | 1.0137 | 0.0285 |
| CDSN       | 0.9874 | 1.1617 | 1.0085 | 0.8973 | 1.0137 | 0.0549 |
| LOC339746  | 0.9873 | 1.1753 | 1.0097 | 0.8826 | 1.0137 | 0.0606 |
| AMAC1L1    | 0.9663 | 1.0657 | 1.1245 | 0.8984 | 1.0137 | 0.0504 |
| MIR1299    | 1.0474 | 1.0672 | 1.0072 | 0.9331 | 1.0137 | 0.0296 |
| CCNI2      | 0.8473 | 1.3305 | 0.9043 | 0.9728 | 1.0137 | 0.1087 |
| HHATL      | 1.0417 | 1.1894 | 0.8690 | 0.9548 | 1.0137 | 0.0683 |
| OR52A1     | 1.0776 | 1.0452 | 0.9914 | 0.9408 | 1.0137 | 0.0301 |
| LOC650406  | 0.9437 | 1.2777 | 0.9544 | 0.8791 | 1.0137 | 0.0895 |
| SPPL3      | 1.1878 | 1.0991 | 0.9975 | 0.7706 | 1.0138 | 0.0899 |
| LOC728678  | 1.0509 | 0.9900 | 0.9531 | 1.0611 | 1.0138 | 0.0256 |
| PDCD1LG2   | 0.9340 | 1.1360 | 1.0816 | 0.9035 | 1.0138 | 0.0563 |
| PTCD3      | 1.0063 | 1.1278 | 1.1271 | 0.7941 | 1.0138 | 0.0786 |
| FAM135A    | 0.9286 | 1.1378 | 1.0666 | 0.9223 | 1.0138 | 0.0531 |
| RNF170     | 0.9777 | 1.0543 | 1.0294 | 0.9938 | 1.0138 | 0.0173 |
| LOC731605  | 0.8756 | 1.0841 | 1.1025 | 0.9930 | 1.0138 | 0.0519 |
| LOC55908   | 0.9915 | 1.1362 | 1.1009 | 0.8266 | 1.0138 | 0.0696 |
| GPR171     | 1.0147 | 1.0462 | 0.9891 | 1.0054 | 1.0138 | 0.0120 |
| MIR429     | 0.9437 | 1.0858 | 1.0056 | 1.0202 | 1.0138 | 0.0292 |
| LOC91948   | 0.9235 | 1.1038 | 1.1014 | 0.9266 | 1.0138 | 0.0513 |
| CREBL2     | 0.9584 | 1.1555 | 1.1073 | 0.8341 | 1.0138 | 0.0731 |
| DKFZP686E2 | 0.9666 | 1.2626 | 1.0672 | 0.7589 | 1.0138 | 0.1049 |
| C4orf10    | 1.0280 | 1.0851 | 1.0481 | 0.8942 | 1.0139 | 0.0416 |

|            |        |        |        |        |        |        |
|------------|--------|--------|--------|--------|--------|--------|
| JOSD1      | 0.8904 | 1.4731 | 0.9447 | 0.7472 | 1.0139 | 0.1586 |
| PLEKHM2    | 1.0322 | 1.2919 | 0.9013 | 0.8300 | 1.0139 | 0.1017 |
| FLJ46010   | 0.9155 | 1.1252 | 0.9889 | 1.0259 | 1.0139 | 0.0436 |
| LOC652570  | 1.0707 | 1.0979 | 0.9766 | 0.9102 | 1.0139 | 0.0432 |
| TMEM146    | 0.9488 | 1.0513 | 1.1230 | 0.9324 | 1.0139 | 0.0449 |
| SNORD124   | 0.9686 | 1.0548 | 1.0236 | 1.0085 | 1.0139 | 0.0179 |
| LOC441964  | 0.9494 | 1.1475 | 1.0696 | 0.8891 | 1.0139 | 0.0582 |
| FLJ40722   | 1.0116 | 1.1283 | 1.0290 | 0.8867 | 1.0139 | 0.0496 |
| LOC400499  | 1.0137 | 1.1242 | 1.0839 | 0.8338 | 1.0139 | 0.0642 |
| MEIS3      | 0.9709 | 1.0326 | 1.0741 | 0.9780 | 1.0139 | 0.0243 |
| RPL18A     | 0.9872 | 1.1802 | 1.0419 | 0.8464 | 1.0139 | 0.0690 |
| CABIN1     | 0.9760 | 1.2281 | 1.0108 | 0.8408 | 1.0139 | 0.0803 |
| OR4C46     | 0.9112 | 1.1254 | 1.0555 | 0.9637 | 1.0139 | 0.0476 |
| CD274      | 0.9868 | 1.1333 | 1.0227 | 0.9129 | 1.0139 | 0.0459 |
| CLDN20     | 1.0549 | 1.0245 | 1.0551 | 0.9213 | 1.0139 | 0.0317 |
| CALB2      | 0.9132 | 1.0629 | 1.1748 | 0.9049 | 1.0139 | 0.0648 |
| LOC647102  | 1.0541 | 1.1575 | 1.0307 | 0.8136 | 1.0140 | 0.0722 |
| LOC654172  | 0.9023 | 1.0996 | 1.1073 | 0.9467 | 1.0140 | 0.0525 |
| LOC649144  | 0.9007 | 1.0337 | 1.2396 | 0.8819 | 1.0140 | 0.0824 |
| SH2D6      | 1.0279 | 1.0261 | 1.1153 | 0.8866 | 1.0140 | 0.0473 |
| LOC647888  | 0.9120 | 1.0998 | 1.0917 | 0.9525 | 1.0140 | 0.0479 |
| ALOX5AP    | 0.9560 | 1.0398 | 1.1641 | 0.8961 | 1.0140 | 0.0581 |
| USP19      | 0.9717 | 1.0822 | 1.1330 | 0.8690 | 1.0140 | 0.0589 |
| CCR6       | 0.7862 | 1.4771 | 0.9744 | 0.8184 | 1.0140 | 0.1597 |
| SSX5       | 1.0025 | 1.0533 | 1.0369 | 0.9633 | 1.0140 | 0.0199 |
| ICAM2      | 0.9064 | 1.1558 | 1.0733 | 0.9205 | 1.0140 | 0.0605 |
| FOXP4      | 1.0397 | 1.0648 | 0.9929 | 0.9588 | 1.0140 | 0.0237 |
| ERCC-00044 | 1.0257 | 1.1713 | 0.9978 | 0.8613 | 1.0140 | 0.0635 |
| RNF39      | 1.0333 | 1.0043 | 1.0777 | 0.9408 | 1.0140 | 0.0287 |
| C21orf124  | 1.0134 | 1.0936 | 1.0554 | 0.8938 | 1.0140 | 0.0433 |
| KCNRG      | 0.9940 | 1.1664 | 1.0359 | 0.8598 | 1.0140 | 0.0632 |
| IRG1       | 1.0337 | 1.0967 | 0.9654 | 0.9604 | 1.0140 | 0.0322 |
| SLC37A2    | 0.8482 | 1.0664 | 1.1118 | 1.0298 | 1.0141 | 0.0578 |
| COL4A6     | 0.9940 | 1.0831 | 1.0663 | 0.9129 | 1.0141 | 0.0389 |
| C9orf167   | 0.9091 | 1.1338 | 1.0787 | 0.9346 | 1.0141 | 0.0547 |
| GABRP      | 1.0922 | 1.1027 | 0.9602 | 0.9012 | 1.0141 | 0.0496 |
| NEU3       | 0.9359 | 1.2021 | 1.0246 | 0.8936 | 1.0141 | 0.0684 |
| LOC1001302 | 1.0287 | 1.0532 | 1.0185 | 0.9559 | 1.0141 | 0.0207 |
| LOC652722  | 0.8564 | 1.1614 | 1.0053 | 1.0332 | 1.0141 | 0.0626 |
| LOC651892  | 0.9259 | 1.1990 | 1.1063 | 0.8251 | 1.0141 | 0.0847 |
| LOC730098  | 0.8779 | 1.3499 | 0.9933 | 0.8353 | 1.0141 | 0.1168 |
| LOC642855  | 0.9508 | 1.1422 | 0.9920 | 0.9714 | 1.0141 | 0.0435 |
| GPR4       | 0.8897 | 1.0387 | 1.1164 | 1.0116 | 1.0141 | 0.0470 |
| TMEM185A   | 0.8261 | 1.4366 | 0.9468 | 0.8470 | 1.0141 | 0.1433 |
| LOC1001309 | 0.9290 | 1.0830 | 1.1337 | 0.9109 | 1.0141 | 0.0555 |
| PDGFD      | 0.9533 | 1.1242 | 1.0824 | 0.8967 | 1.0141 | 0.0534 |

|            |        |        |        |        |        |        |
|------------|--------|--------|--------|--------|--------|--------|
| RNASEK     | 1.0483 | 1.2333 | 1.0478 | 0.7272 | 1.0141 | 0.1051 |
| LOC401442  | 0.9786 | 1.1137 | 0.9900 | 0.9744 | 1.0142 | 0.0333 |
| LOC645566  | 1.0553 | 1.0162 | 1.0328 | 0.9524 | 1.0142 | 0.0221 |
| MIR1238    | 1.0093 | 1.0327 | 1.1025 | 0.9122 | 1.0142 | 0.0393 |
| CRYM       | 0.9150 | 1.1853 | 1.0828 | 0.8737 | 1.0142 | 0.0728 |
| MIR1257    | 0.9103 | 1.1590 | 1.0732 | 0.9144 | 1.0142 | 0.0614 |
| SOCS7      | 0.9403 | 1.2166 | 1.0865 | 0.8134 | 1.0142 | 0.0875 |
| UNC119B    | 0.8968 | 1.2761 | 1.0336 | 0.8504 | 1.0142 | 0.0956 |
| LRFN2      | 1.0048 | 1.1700 | 0.9520 | 0.9301 | 1.0142 | 0.0542 |
| MYH1       | 0.9595 | 1.0739 | 1.0881 | 0.9355 | 1.0142 | 0.0389 |
| LOC400406  | 0.8974 | 1.1044 | 1.0624 | 0.9929 | 1.0143 | 0.0452 |
| LOC728576  | 0.9295 | 1.1308 | 1.0428 | 0.9540 | 1.0143 | 0.0458 |
| LOC728018  | 1.0210 | 1.0507 | 1.0589 | 0.9265 | 1.0143 | 0.0304 |
| LOC651452  | 0.9231 | 1.1139 | 1.0825 | 0.9376 | 1.0143 | 0.0490 |
| LOC648469  | 0.9885 | 1.1353 | 0.9887 | 0.9448 | 1.0143 | 0.0416 |
| LOC285697  | 1.0127 | 1.1788 | 0.9872 | 0.8785 | 1.0143 | 0.0621 |
| TRPS1      | 0.8354 | 1.1606 | 1.2189 | 0.8425 | 1.0143 | 0.1020 |
| PCTK1      | 0.8889 | 1.1620 | 1.1949 | 0.8115 | 1.0143 | 0.0963 |
| MED13      | 0.9993 | 1.1345 | 1.0068 | 0.9168 | 1.0144 | 0.0449 |
| LOC1001304 | 0.9181 | 1.1117 | 1.1099 | 0.9177 | 1.0144 | 0.0557 |
| DDX58      | 0.8341 | 1.2898 | 1.0090 | 0.9246 | 1.0144 | 0.0985 |
| SAMD10     | 0.9092 | 1.2747 | 0.9901 | 0.8835 | 1.0144 | 0.0897 |
| LAG3       | 0.9484 | 1.0852 | 0.9879 | 1.0361 | 1.0144 | 0.0296 |
| MGC71993   | 0.8768 | 1.3720 | 1.0232 | 0.7855 | 1.0144 | 0.1289 |
| UQCRQ      | 0.8416 | 1.2243 | 1.1567 | 0.8350 | 1.0144 | 0.1026 |
| LOC648000  | 0.8506 | 1.3748 | 1.0290 | 0.8032 | 1.0144 | 0.1296 |
| CMPK1      | 0.8239 | 1.2861 | 1.2310 | 0.7165 | 1.0144 | 0.1431 |
| TCEB3B     | 1.0269 | 0.9684 | 1.1649 | 0.8974 | 1.0144 | 0.0567 |
| LOC728006  | 0.7526 | 1.4311 | 1.0493 | 0.8246 | 1.0144 | 0.1526 |
| FAT4       | 0.8980 | 1.0946 | 1.0955 | 0.9696 | 1.0144 | 0.0488 |
| LOC1001345 | 0.9775 | 1.1721 | 1.0003 | 0.9077 | 1.0144 | 0.0561 |
| ACRBP      | 1.0619 | 1.0859 | 1.0641 | 0.8457 | 1.0144 | 0.0565 |
| NTRK1      | 0.9766 | 1.0373 | 1.0972 | 0.9466 | 1.0144 | 0.0334 |
| LGALS12    | 1.0884 | 1.0609 | 0.9591 | 0.9493 | 1.0144 | 0.0353 |
| WBP1       | 0.8817 | 1.3161 | 1.0901 | 0.7699 | 1.0144 | 0.1205 |
| LOC643491  | 1.0148 | 1.0744 | 1.0370 | 0.9315 | 1.0144 | 0.0302 |
| MAP3K7IP2  | 0.9974 | 1.1931 | 0.9893 | 0.8779 | 1.0144 | 0.0655 |
| LOC648751  | 1.0339 | 1.0791 | 1.0519 | 0.8928 | 1.0144 | 0.0416 |
| PON3       | 1.0687 | 1.0656 | 1.0114 | 0.9121 | 1.0144 | 0.0366 |
| OR4C3      | 0.9699 | 1.0881 | 1.0529 | 0.9469 | 1.0144 | 0.0335 |
| LOC730465  | 0.9487 | 1.1349 | 1.0165 | 0.9577 | 1.0144 | 0.0429 |
| KCNK3      | 0.9833 | 1.2568 | 0.8772 | 0.9404 | 1.0144 | 0.0837 |
| LOC642929  | 0.9426 | 1.1231 | 1.0640 | 0.9282 | 1.0144 | 0.0473 |
| OR6K3      | 0.9595 | 1.1469 | 1.0620 | 0.8894 | 1.0145 | 0.0566 |
| MYOM1      | 1.0257 | 1.1061 | 1.0163 | 0.9098 | 1.0145 | 0.0403 |
| C10orf99   | 1.0405 | 1.0743 | 1.0332 | 0.9098 | 1.0145 | 0.0360 |

|            |        |        |        |        |        |        |
|------------|--------|--------|--------|--------|--------|--------|
| GYPE       | 0.9533 | 1.0940 | 1.0467 | 0.9639 | 1.0145 | 0.0337 |
| BIN2       | 0.9783 | 1.0633 | 1.0605 | 0.9557 | 1.0145 | 0.0278 |
| FAM70A     | 0.9740 | 1.0456 | 1.1950 | 0.8434 | 1.0145 | 0.0733 |
| TMEM74     | 1.0091 | 0.9834 | 1.1026 | 0.9629 | 1.0145 | 0.0308 |
| TOX4       | 0.9747 | 1.1421 | 1.0691 | 0.8721 | 1.0145 | 0.0585 |
| CD2BP2     | 0.8319 | 1.4267 | 0.9713 | 0.8281 | 1.0145 | 0.1414 |
| LOC644228  | 0.9429 | 1.0523 | 1.1646 | 0.8983 | 1.0145 | 0.0596 |
| CXCR4      | 0.9598 | 1.1732 | 1.0317 | 0.8934 | 1.0145 | 0.0599 |
| C15orf43   | 0.9142 | 1.2417 | 0.9936 | 0.9086 | 1.0145 | 0.0782 |
| LOC255187  | 0.9510 | 1.0739 | 1.0085 | 1.0247 | 1.0145 | 0.0253 |
| WSCD1      | 0.9323 | 1.1781 | 0.9408 | 1.0070 | 1.0146 | 0.0570 |
| LOC652234  | 0.9174 | 1.0808 | 1.0728 | 0.9872 | 1.0146 | 0.0387 |
| LOC442124  | 0.8521 | 1.1740 | 1.0353 | 0.9968 | 1.0146 | 0.0662 |
| SNX10      | 1.1393 | 1.0489 | 1.1061 | 0.7640 | 1.0146 | 0.0856 |
| FLJ25758   | 0.8895 | 1.1648 | 1.1763 | 0.8279 | 1.0146 | 0.0909 |
| RAD51AP2   | 0.8909 | 1.1008 | 1.0958 | 0.9709 | 1.0146 | 0.0510 |
| LOC284067  | 0.9762 | 1.0919 | 1.0787 | 0.9117 | 1.0146 | 0.0430 |
| B3Gn-T6    | 0.9324 | 1.1085 | 1.0974 | 0.9201 | 1.0146 | 0.0511 |
| LOC1001333 | 0.9735 | 1.2220 | 0.8921 | 0.9709 | 1.0146 | 0.0717 |
| LOC1001316 | 0.9538 | 1.0156 | 1.0342 | 1.0549 | 1.0146 | 0.0218 |
| ECEL1      | 0.9421 | 1.1951 | 1.0212 | 0.9001 | 1.0146 | 0.0652 |
| ZNF806     | 0.9780 | 1.0802 | 1.0587 | 0.9417 | 1.0146 | 0.0328 |
| MARK2      | 0.9616 | 1.1912 | 1.0095 | 0.8963 | 1.0147 | 0.0633 |
| LOC1001341 | 1.0394 | 1.1058 | 1.0191 | 0.8943 | 1.0147 | 0.0442 |
| TUBA3E     | 0.7673 | 1.5464 | 0.9956 | 0.7494 | 1.0147 | 0.1859 |
| HIST3H2A   | 0.8574 | 1.4419 | 0.9452 | 0.8142 | 1.0147 | 0.1450 |
| C10orf54   | 0.9901 | 1.0939 | 1.0257 | 0.9489 | 1.0147 | 0.0307 |
| MGC50722   | 0.8981 | 1.2725 | 1.0294 | 0.8587 | 1.0147 | 0.0934 |
| OR2T27     | 1.0285 | 0.9626 | 1.0620 | 1.0057 | 1.0147 | 0.0209 |
| PCGEM1     | 0.9699 | 1.0431 | 1.0732 | 0.9727 | 1.0147 | 0.0258 |
| RRBP1      | 0.8753 | 1.4905 | 0.9417 | 0.7513 | 1.0147 | 0.1634 |
| LOC647691  | 0.9767 | 1.1381 | 1.0953 | 0.8488 | 1.0147 | 0.0650 |
| LOC1001330 | 0.9344 | 1.0979 | 1.0116 | 1.0149 | 1.0147 | 0.0334 |
| ANGPTL6    | 0.9489 | 1.1971 | 0.9966 | 0.9162 | 1.0147 | 0.0630 |
| GALNT6     | 1.0603 | 1.0779 | 1.0056 | 0.9151 | 1.0147 | 0.0366 |
| LOC654433  | 1.0179 | 1.0881 | 1.0163 | 0.9368 | 1.0148 | 0.0309 |
| SLITRK1    | 0.9955 | 1.0470 | 1.0515 | 0.9650 | 1.0148 | 0.0209 |
| INDO       | 0.9866 | 1.0214 | 1.0874 | 0.9637 | 1.0148 | 0.0270 |
| LOC441204  | 0.9510 | 1.1467 | 1.0564 | 0.9049 | 1.0148 | 0.0542 |
| METTL8     | 1.0665 | 1.0422 | 0.9911 | 0.9593 | 1.0148 | 0.0243 |
| FZD7       | 0.9151 | 1.2671 | 0.9949 | 0.8819 | 1.0148 | 0.0874 |
| SLC12A6    | 0.9609 | 1.1799 | 1.0132 | 0.9052 | 1.0148 | 0.0593 |
| LOC554207  | 0.9709 | 1.0186 | 1.1562 | 0.9134 | 1.0148 | 0.0518 |
| SNORA39    | 0.9877 | 1.1250 | 1.0381 | 0.9083 | 1.0148 | 0.0454 |
| ALS2CR8    | 1.0403 | 1.1653 | 0.8824 | 0.9712 | 1.0148 | 0.0597 |
| LOC642426  | 1.0131 | 1.2134 | 0.9338 | 0.8989 | 1.0148 | 0.0704 |



|            |        |        |        |        |        |        |
|------------|--------|--------|--------|--------|--------|--------|
| LOC649041  | 1.0005 | 1.1800 | 0.9830 | 0.8957 | 1.0148 | 0.0597 |
| DEFB135    | 0.9396 | 1.1300 | 0.9836 | 1.0061 | 1.0148 | 0.0408 |
| OR52B2     | 0.9310 | 1.1101 | 0.9656 | 1.0525 | 1.0148 | 0.0408 |
| LOC645194  | 0.9614 | 1.1071 | 0.9391 | 1.0517 | 1.0148 | 0.0392 |
| C21orf114  | 1.0138 | 0.9826 | 1.1215 | 0.9414 | 1.0148 | 0.0385 |
| LOC647415  | 0.9020 | 1.1170 | 0.9975 | 1.0428 | 1.0148 | 0.0450 |
| LOC649701  | 1.0169 | 1.0777 | 1.0263 | 0.9385 | 1.0148 | 0.0287 |
| ZNF212     | 0.9020 | 1.2760 | 1.0484 | 0.8330 | 1.0149 | 0.0980 |
| SLC7A8     | 0.9798 | 1.1518 | 1.0194 | 0.9084 | 1.0149 | 0.0511 |
| APCS       | 0.9188 | 1.0688 | 1.1380 | 0.9339 | 1.0149 | 0.0531 |
| LOC642851  | 1.0654 | 1.0464 | 1.0149 | 0.9328 | 1.0149 | 0.0293 |
| LOC387867  | 0.8654 | 1.2743 | 1.1351 | 0.7847 | 1.0149 | 0.1144 |
| LOC652435  | 1.0452 | 1.1001 | 1.0216 | 0.8926 | 1.0149 | 0.0440 |
| SDK1       | 0.9085 | 1.1538 | 1.0927 | 0.9047 | 1.0149 | 0.0638 |
| VDAC2      | 0.9151 | 1.0816 | 1.0395 | 1.0235 | 1.0149 | 0.0355 |
| C5orf53    | 0.9724 | 1.2864 | 1.0200 | 0.7809 | 1.0149 | 0.1042 |
| STATH      | 0.9597 | 1.1538 | 1.0330 | 0.9132 | 1.0149 | 0.0525 |
| LOC653382  | 0.9762 | 1.1519 | 1.0472 | 0.8846 | 1.0150 | 0.0565 |
| SLC32A1    | 1.0210 | 1.1059 | 1.0561 | 0.8767 | 1.0150 | 0.0493 |
| EFHD1      | 0.9856 | 1.0630 | 1.0742 | 0.9371 | 1.0150 | 0.0326 |
| LOC389286  | 0.9292 | 1.3324 | 0.9594 | 0.8388 | 1.0150 | 0.1089 |
| LOC648674  | 0.9653 | 1.2423 | 1.0249 | 0.8275 | 1.0150 | 0.0863 |
| LOC1001320 | 0.9706 | 1.1317 | 1.0022 | 0.9553 | 1.0150 | 0.0401 |
| LOC645527  | 1.0050 | 1.0332 | 1.0780 | 0.9438 | 1.0150 | 0.0281 |
| LOC391770  | 0.9830 | 1.1415 | 1.0061 | 0.9293 | 1.0150 | 0.0451 |
| LOC1001283 | 0.9526 | 1.0693 | 1.0972 | 0.9409 | 1.0150 | 0.0399 |
| C21orf71   | 0.9014 | 1.1015 | 1.1402 | 0.9169 | 1.0150 | 0.0617 |
| SLC2A1     | 0.8290 | 1.5155 | 0.9499 | 0.7656 | 1.0150 | 0.1712 |
| CACNA1I    | 0.9605 | 1.1076 | 1.0473 | 0.9447 | 1.0150 | 0.0382 |
| LOC652692  | 0.9266 | 1.1371 | 1.0642 | 0.9321 | 1.0150 | 0.0516 |
| LOC389405  | 0.9075 | 1.3184 | 1.1245 | 0.7097 | 1.0150 | 0.1319 |
| SCARNA15   | 0.9613 | 1.0225 | 1.1086 | 0.9677 | 1.0150 | 0.0341 |
| LOC730426  | 0.8735 | 1.1261 | 1.0331 | 1.0275 | 1.0150 | 0.0523 |
| LOC642008  | 1.0107 | 1.0787 | 1.0915 | 0.8792 | 1.0150 | 0.0486 |
| LOC644876  | 0.9488 | 1.1218 | 1.0060 | 0.9836 | 1.0150 | 0.0375 |
| DIRC1      | 1.0317 | 1.0797 | 1.0328 | 0.9159 | 1.0150 | 0.0349 |
| FLJ23865   | 0.9730 | 1.0379 | 1.0219 | 1.0275 | 1.0151 | 0.0144 |
| LOC1001347 | 1.0037 | 1.1361 | 1.0296 | 0.8910 | 1.0151 | 0.0503 |
| LOC441233  | 0.9769 | 1.1463 | 1.0448 | 0.8922 | 1.0151 | 0.0538 |
| MIR548A1   | 0.9583 | 1.0701 | 1.0559 | 0.9760 | 1.0151 | 0.0280 |
| MGC44328   | 0.9642 | 1.2031 | 1.0283 | 0.8647 | 1.0151 | 0.0711 |
| LOC728667  | 0.8568 | 1.0792 | 1.1115 | 1.0128 | 1.0151 | 0.0566 |
| COPA       | 0.8559 | 1.3615 | 1.1170 | 0.7258 | 1.0151 | 0.1413 |
| LOC388397  | 0.9404 | 1.2406 | 1.0191 | 0.8604 | 1.0151 | 0.0819 |
| PSMD4      | 0.9287 | 1.5038 | 0.8752 | 0.7529 | 1.0151 | 0.1670 |
| LOC283157  | 0.9216 | 1.0835 | 1.1297 | 0.9258 | 1.0151 | 0.0536 |

|            |        |        |        |        |        |        |
|------------|--------|--------|--------|--------|--------|--------|
| LOC440434  | 0.9814 | 1.0800 | 1.1172 | 0.8819 | 1.0151 | 0.0528 |
| LOC729684  | 0.9251 | 1.1161 | 1.0963 | 0.9231 | 1.0151 | 0.0527 |
| CST9L      | 0.9793 | 1.0376 | 0.9911 | 1.0526 | 1.0152 | 0.0177 |
| MIR323     | 0.9885 | 1.0800 | 1.0288 | 0.9633 | 1.0152 | 0.0255 |
| LOC644255  | 1.0105 | 1.0877 | 0.9778 | 0.9847 | 1.0152 | 0.0252 |
| TNS3       | 1.0338 | 1.0595 | 1.0224 | 0.9450 | 1.0152 | 0.0246 |
| LOC652819  | 0.8793 | 1.1416 | 1.0963 | 0.9434 | 1.0152 | 0.0620 |
| ZNF512     | 0.9217 | 1.3548 | 0.9823 | 0.8019 | 1.0152 | 0.1192 |
| ECHDC1     | 0.9760 | 1.1328 | 0.9550 | 0.9968 | 1.0152 | 0.0401 |
| LOC392871  | 0.9139 | 1.3554 | 1.0065 | 0.7848 | 1.0152 | 0.1222 |
| LOC1001332 | 0.9034 | 1.1858 | 1.0604 | 0.9110 | 1.0152 | 0.0674 |
| PGM1       | 0.8713 | 1.4744 | 1.0215 | 0.6935 | 1.0152 | 0.1671 |
| OGT        | 0.8712 | 1.3921 | 1.0185 | 0.7789 | 1.0152 | 0.1350 |
| SNORD101   | 0.9426 | 1.1467 | 1.0514 | 0.9200 | 1.0152 | 0.0524 |
| CLEC4G     | 0.8966 | 1.0649 | 1.0676 | 1.0316 | 1.0152 | 0.0404 |
| LRP1       | 1.0058 | 1.1294 | 1.0407 | 0.8849 | 1.0152 | 0.0506 |
| LOC644719  | 0.9690 | 1.0807 | 1.0760 | 0.9351 | 1.0152 | 0.0371 |
| INHBC      | 0.9002 | 1.1251 | 1.0105 | 1.0251 | 1.0152 | 0.0460 |
| CLIC5      | 1.0056 | 1.0278 | 1.0539 | 0.9737 | 1.0152 | 0.0170 |
| PNPLA5     | 0.8612 | 1.1314 | 0.9831 | 1.0852 | 1.0152 | 0.0600 |
| LOC1001347 | 0.9642 | 1.0538 | 1.0766 | 0.9663 | 1.0152 | 0.0292 |
| LOC647890  | 1.0478 | 1.1196 | 1.0674 | 0.8261 | 1.0152 | 0.0648 |
| FLJ40852   | 1.0589 | 1.2650 | 0.8706 | 0.8664 | 1.0152 | 0.0946 |
| ZDHHC22    | 0.9727 | 1.0544 | 1.1650 | 0.8689 | 1.0152 | 0.0627 |
| SCAND3     | 0.9997 | 1.2628 | 0.9394 | 0.8590 | 1.0152 | 0.0874 |
| ABCC1      | 1.0675 | 1.2819 | 0.8874 | 0.8242 | 1.0153 | 0.1027 |
| ZNF574     | 1.0289 | 1.0237 | 1.0299 | 0.9785 | 1.0153 | 0.0123 |
| LOC1001329 | 0.9903 | 1.0452 | 1.0680 | 0.9576 | 1.0153 | 0.0252 |
| LOC729971  | 1.0200 | 1.0197 | 1.0345 | 0.9869 | 1.0153 | 0.0101 |
| LOC647595  | 0.9126 | 1.1268 | 1.0593 | 0.9625 | 1.0153 | 0.0480 |
| CRIP1      | 1.0071 | 1.1254 | 1.0338 | 0.8950 | 1.0153 | 0.0474 |
| HK3        | 0.9761 | 1.0974 | 1.0329 | 0.9549 | 1.0153 | 0.0319 |
| LOC653606  | 1.0256 | 1.0340 | 1.0747 | 0.9269 | 1.0153 | 0.0314 |
| LOC389493  | 1.0072 | 1.1337 | 0.9403 | 0.9801 | 1.0153 | 0.0418 |
| IER3       | 1.0119 | 0.9446 | 1.1575 | 0.9473 | 1.0153 | 0.0499 |
| LOC646359  | 0.9620 | 1.0986 | 1.1105 | 0.8904 | 1.0154 | 0.0536 |
| LHB        | 0.9966 | 1.1518 | 0.9937 | 0.9194 | 1.0154 | 0.0489 |
| C9orf47    | 0.9733 | 1.0856 | 1.0904 | 0.9122 | 1.0154 | 0.0437 |
| ASAH1      | 0.8145 | 1.3433 | 1.0751 | 0.8285 | 1.0154 | 0.1246 |
| ANKRD30A   | 0.9833 | 1.0667 | 1.0298 | 0.9817 | 1.0154 | 0.0204 |
| LOC647074  | 0.9291 | 1.1840 | 1.0849 | 0.8636 | 1.0154 | 0.0729 |
| LOC1001321 | 0.8870 | 1.1809 | 1.0691 | 0.9247 | 1.0154 | 0.0677 |
| LOC643011  | 0.9181 | 1.1206 | 1.1557 | 0.8673 | 1.0154 | 0.0720 |
| PGM5P2     | 1.0752 | 1.0324 | 1.0357 | 0.9185 | 1.0154 | 0.0337 |
| ERCC-00076 | 0.9610 | 1.0380 | 1.0276 | 1.0352 | 1.0154 | 0.0183 |
| LOC647788  | 1.0301 | 1.1901 | 0.9511 | 0.8905 | 1.0155 | 0.0649 |

|            |        |        |        |        |        |        |
|------------|--------|--------|--------|--------|--------|--------|
| ZNF649     | 1.0175 | 1.0393 | 1.1178 | 0.8872 | 1.0155 | 0.0479 |
| PPIL2      | 0.9631 | 1.1652 | 0.9784 | 0.9552 | 1.0155 | 0.0501 |
| CMTM2      | 0.9986 | 1.0716 | 1.0695 | 0.9221 | 1.0155 | 0.0354 |
| SNRP70     | 0.9221 | 1.0800 | 1.0385 | 1.0213 | 1.0155 | 0.0335 |
| MIR1225    | 1.0292 | 1.1199 | 1.0178 | 0.8951 | 1.0155 | 0.0462 |
| OPRK1      | 0.9814 | 1.2454 | 1.0945 | 0.7407 | 1.0155 | 0.1064 |
| LOC1001323 | 0.8185 | 1.1291 | 1.1350 | 0.9794 | 1.0155 | 0.0749 |
| FRAT1      | 0.9992 | 1.1686 | 1.0234 | 0.8708 | 1.0155 | 0.0610 |
| LIN37      | 0.9118 | 1.0850 | 1.0680 | 0.9974 | 1.0155 | 0.0394 |
| LOC645460  | 0.8686 | 1.2252 | 1.0514 | 0.9169 | 1.0155 | 0.0799 |
| PPEF1      | 0.9510 | 1.1821 | 0.9337 | 0.9953 | 1.0155 | 0.0570 |
| LOC644111  | 0.9416 | 1.0674 | 1.1126 | 0.9404 | 1.0155 | 0.0440 |
| MIR21      | 1.0232 | 0.9965 | 1.0805 | 0.9620 | 1.0156 | 0.0250 |
| LOC728320  | 0.9091 | 1.2484 | 1.0143 | 0.8904 | 1.0156 | 0.0823 |
| C20orf191  | 0.9410 | 1.4202 | 0.9630 | 0.7379 | 1.0156 | 0.1441 |
| C10orf110  | 0.9691 | 1.1861 | 1.0598 | 0.8473 | 1.0156 | 0.0716 |
| GPRC5B     | 1.0086 | 1.1357 | 1.0633 | 0.8548 | 1.0156 | 0.0596 |
| LOC643258  | 0.8641 | 1.0229 | 1.2274 | 0.9481 | 1.0156 | 0.0777 |
| THBS3      | 1.0401 | 1.1716 | 0.9423 | 0.9084 | 1.0156 | 0.0590 |
| LOC642144  | 0.9670 | 1.0690 | 0.9558 | 1.0706 | 1.0156 | 0.0314 |
| LOC732134  | 1.0179 | 1.0647 | 1.0407 | 0.9392 | 1.0156 | 0.0272 |
| C8orf31    | 0.9649 | 1.0769 | 1.0414 | 0.9793 | 1.0156 | 0.0263 |
| MIR455     | 0.9803 | 1.0120 | 1.0481 | 1.0221 | 1.0156 | 0.0140 |
| PPP1R9B    | 0.9873 | 1.0874 | 1.0611 | 0.9268 | 1.0156 | 0.0364 |
| TBC1D13    | 0.9278 | 1.2760 | 0.9961 | 0.8627 | 1.0156 | 0.0909 |
| LOC643081  | 1.0052 | 1.0273 | 0.9853 | 1.0449 | 1.0157 | 0.0130 |
| LOC645863  | 0.9685 | 1.2201 | 1.0248 | 0.8493 | 1.0157 | 0.0773 |
| LUZP5      | 0.9368 | 1.1300 | 1.0694 | 0.9265 | 1.0157 | 0.0501 |
| PCLO       | 1.0378 | 1.0555 | 1.0689 | 0.9004 | 1.0157 | 0.0389 |
| LOC1001322 | 0.9661 | 1.3337 | 0.9685 | 0.7944 | 1.0157 | 0.1136 |
| SCAPER     | 1.0328 | 1.2996 | 0.9564 | 0.7740 | 1.0157 | 0.1091 |
| LOC1001326 | 1.0220 | 1.1773 | 0.8954 | 0.9680 | 1.0157 | 0.0598 |
| RNASE1     | 0.9914 | 1.0729 | 1.0546 | 0.9439 | 1.0157 | 0.0296 |
| LOC651400  | 1.0541 | 1.0380 | 1.0749 | 0.8958 | 1.0157 | 0.0407 |
| LOC644524  | 0.9676 | 1.1227 | 1.0676 | 0.9049 | 1.0157 | 0.0489 |
| LOC648304  | 1.0110 | 1.0137 | 1.1286 | 0.9095 | 1.0157 | 0.0448 |
| LOC646698  | 0.9627 | 1.1064 | 1.0220 | 0.9717 | 1.0157 | 0.0329 |
| LOC1001295 | 1.0061 | 1.0785 | 1.0807 | 0.8975 | 1.0157 | 0.0430 |
| LOC645848  | 0.9663 | 1.2596 | 0.8632 | 0.9738 | 1.0157 | 0.0851 |
| LOC285442  | 0.9215 | 1.1702 | 1.1030 | 0.8682 | 1.0157 | 0.0720 |
| LOC1001334 | 0.9655 | 1.1184 | 1.0257 | 0.9532 | 1.0157 | 0.0377 |
| PRH1       | 0.9761 | 1.1085 | 1.0062 | 0.9721 | 1.0157 | 0.0319 |
| LOC728747  | 1.0379 | 1.0576 | 1.0095 | 0.9579 | 1.0157 | 0.0217 |
| OR51G2     | 1.0017 | 1.0455 | 1.0606 | 0.9551 | 1.0157 | 0.0238 |
| CA10       | 0.9948 | 1.2029 | 0.9730 | 0.8923 | 1.0157 | 0.0662 |
| CD276      | 0.9752 | 1.4845 | 0.9646 | 0.6386 | 1.0157 | 0.1747 |

|            |        |        |        |        |        |        |
|------------|--------|--------|--------|--------|--------|--------|
| LOC728832  | 1.0219 | 1.0743 | 1.0208 | 0.9460 | 1.0157 | 0.0264 |
| LARP4B     | 0.9407 | 1.4353 | 0.7963 | 0.8907 | 1.0158 | 0.1430 |
| SLC39A13   | 0.9317 | 1.1237 | 1.0458 | 0.9619 | 1.0158 | 0.0433 |
| ESYT1      | 0.8285 | 1.4879 | 0.9965 | 0.7502 | 1.0158 | 0.1655 |
| DAB2       | 0.9450 | 1.0680 | 1.0540 | 0.9963 | 1.0158 | 0.0282 |
| LOC645648  | 0.9493 | 1.1722 | 1.1198 | 0.8219 | 1.0158 | 0.0803 |
| HCRTR2     | 0.9148 | 1.0922 | 1.1201 | 0.9362 | 1.0158 | 0.0526 |
| KLF5       | 0.9651 | 1.0317 | 1.1455 | 0.9209 | 1.0158 | 0.0489 |
| DNAH5      | 0.9442 | 1.2428 | 0.9518 | 0.9246 | 1.0158 | 0.0759 |
| MIR199B    | 0.8347 | 1.2160 | 1.1232 | 0.8895 | 1.0159 | 0.0915 |
| MAOB       | 0.9221 | 1.1740 | 1.0569 | 0.9104 | 1.0159 | 0.0623 |
| LOC652173  | 1.0571 | 1.0414 | 1.0868 | 0.8782 | 1.0159 | 0.0468 |
| POLR2D     | 0.8370 | 1.5949 | 0.8907 | 0.7409 | 1.0159 | 0.1955 |
| LOC652197  | 1.0244 | 1.0220 | 1.1524 | 0.8648 | 1.0159 | 0.0589 |
| KIAA0082   | 0.9451 | 1.1843 | 1.0508 | 0.8834 | 1.0159 | 0.0659 |
| LOC644763  | 0.9485 | 1.1666 | 1.0799 | 0.8685 | 1.0159 | 0.0665 |
| MIR135A2   | 1.0085 | 1.0369 | 1.0628 | 0.9553 | 1.0159 | 0.0230 |
| SUFU       | 0.9373 | 1.2141 | 1.0080 | 0.9044 | 1.0159 | 0.0695 |
| LOC121952  | 0.9739 | 1.0905 | 1.0810 | 0.9184 | 1.0159 | 0.0419 |
| FIGF       | 0.8753 | 1.2240 | 0.9902 | 0.9742 | 1.0159 | 0.0739 |
| TMX4       | 0.8659 | 1.3267 | 1.1062 | 0.7651 | 1.0160 | 0.1259 |
| LOC1001304 | 0.9012 | 1.3213 | 0.8377 | 1.0037 | 1.0160 | 0.1074 |
| EEF1A1     | 0.9660 | 1.0942 | 1.0779 | 0.9258 | 1.0160 | 0.0414 |
| LOC1001340 | 1.0181 | 1.0510 | 1.0435 | 0.9513 | 1.0160 | 0.0227 |
| KCNC1      | 1.0236 | 1.0223 | 1.0758 | 0.9423 | 1.0160 | 0.0275 |
| LOC399881  | 0.9284 | 1.1275 | 1.0261 | 0.9819 | 1.0160 | 0.0422 |
| ATP6AP1L   | 0.9623 | 1.1205 | 1.0920 | 0.8892 | 1.0160 | 0.0545 |
| MON1B      | 1.0109 | 1.2491 | 1.0378 | 0.7662 | 1.0160 | 0.0989 |
| LOC642418  | 1.0627 | 1.0280 | 1.1199 | 0.8534 | 1.0160 | 0.0574 |
| LOC643750  | 1.0492 | 1.0799 | 1.0486 | 0.8864 | 1.0160 | 0.0438 |
| MPZ        | 0.9233 | 1.1758 | 1.0582 | 0.9068 | 1.0160 | 0.0631 |
| FPGT       | 1.0152 | 1.1031 | 1.0900 | 0.8559 | 1.0160 | 0.0568 |
| LOC653577  | 0.9552 | 0.9950 | 1.0208 | 1.0932 | 1.0160 | 0.0290 |
| RASSF6     | 0.9937 | 1.1176 | 1.0503 | 0.9026 | 1.0160 | 0.0455 |
| SNHG3      | 0.9316 | 1.1265 | 0.9828 | 1.0232 | 1.0160 | 0.0413 |
| IGSF22     | 0.9609 | 1.1089 | 0.9877 | 1.0067 | 1.0161 | 0.0324 |
| LOC1001284 | 0.9573 | 1.0818 | 1.0517 | 0.9735 | 1.0161 | 0.0301 |
| TP53TG1    | 1.0961 | 1.0598 | 1.1044 | 0.8040 | 1.0161 | 0.0714 |
| SNPH       | 0.9896 | 1.0540 | 1.0525 | 0.9683 | 1.0161 | 0.0219 |
| LOC653808  | 0.9863 | 1.1398 | 0.9945 | 0.9438 | 1.0161 | 0.0427 |
| CALCB      | 0.9403 | 1.0697 | 1.0220 | 1.0324 | 1.0161 | 0.0272 |
| SLITRK5    | 0.8995 | 1.0927 | 1.0515 | 1.0206 | 1.0161 | 0.0416 |
| LOC652751  | 0.9001 | 1.1794 | 0.9671 | 1.0178 | 1.0161 | 0.0595 |
| CHRNA4     | 1.0290 | 1.0325 | 0.9778 | 1.0251 | 1.0161 | 0.0129 |
| LOC647163  | 0.9352 | 1.0741 | 1.1588 | 0.8963 | 1.0161 | 0.0610 |
| ZNF501     | 0.9166 | 1.0896 | 1.1234 | 0.9348 | 1.0161 | 0.0528 |

|            |        |        |        |        |        |        |
|------------|--------|--------|--------|--------|--------|--------|
| LOC729487  | 0.8767 | 1.0665 | 1.1603 | 0.9610 | 1.0161 | 0.0618 |
| CD5        | 0.9753 | 1.0778 | 1.0383 | 0.9732 | 1.0161 | 0.0255 |
| LOC440792  | 0.9896 | 1.0464 | 1.0779 | 0.9507 | 1.0162 | 0.0285 |
| LOC401131  | 0.9328 | 1.1023 | 1.1251 | 0.9045 | 1.0162 | 0.0568 |
| OR9G1      | 0.9535 | 1.1487 | 0.9913 | 0.9712 | 1.0162 | 0.0448 |
| CDH11      | 0.9443 | 1.1058 | 1.0615 | 0.9532 | 1.0162 | 0.0400 |
| FLJ16124   | 0.9707 | 1.0754 | 1.0359 | 0.9826 | 1.0162 | 0.0243 |
| MR1        | 0.9136 | 1.2971 | 0.9784 | 0.8756 | 1.0162 | 0.0960 |
| LOC126987  | 0.9787 | 1.0747 | 1.1357 | 0.8757 | 1.0162 | 0.0569 |
| OR6T1      | 0.9490 | 1.0727 | 1.0133 | 1.0299 | 1.0162 | 0.0257 |
| LOC644026  | 1.1322 | 1.0046 | 1.0013 | 0.9267 | 1.0162 | 0.0426 |
| C2CD3      | 0.9172 | 1.2084 | 1.0762 | 0.8630 | 1.0162 | 0.0784 |
| C17orf50   | 1.0267 | 1.0725 | 1.0523 | 0.9134 | 1.0162 | 0.0355 |
| LOC647171  | 0.9260 | 1.1434 | 1.0811 | 0.9143 | 1.0162 | 0.0570 |
| TLR8       | 1.0165 | 1.0313 | 1.0508 | 0.9663 | 1.0162 | 0.0181 |
| C1orf92    | 1.0421 | 1.0352 | 1.0733 | 0.9144 | 1.0162 | 0.0349 |
| LOC652002  | 0.9800 | 0.9649 | 1.1261 | 0.9939 | 1.0162 | 0.0371 |
| LOC651612  | 1.0736 | 1.0114 | 1.0487 | 0.9314 | 1.0163 | 0.0310 |
| LOC653169  | 0.9960 | 1.1782 | 0.9783 | 0.9125 | 1.0163 | 0.0569 |
| MSH4       | 0.9763 | 1.0988 | 1.0199 | 0.9700 | 1.0163 | 0.0297 |
| LOC732415  | 1.0141 | 1.1341 | 1.0075 | 0.9093 | 1.0163 | 0.0460 |
| LOC643430  | 0.8701 | 1.1765 | 1.0876 | 0.9309 | 1.0163 | 0.0704 |
| LOC1001332 | 1.0661 | 1.0439 | 0.9383 | 1.0168 | 1.0163 | 0.0279 |
| FLJ22675   | 0.9984 | 1.1553 | 0.9609 | 0.9506 | 1.0163 | 0.0475 |
| SNORD112   | 1.0083 | 1.1109 | 1.0330 | 0.9130 | 1.0163 | 0.0408 |
| FLJ41941   | 0.7872 | 1.2543 | 1.0917 | 0.9322 | 1.0163 | 0.1008 |
| SLC6A14    | 0.9918 | 1.0715 | 1.0359 | 0.9662 | 1.0163 | 0.0233 |
| FAR2       | 0.9186 | 1.0929 | 1.1619 | 0.8919 | 1.0163 | 0.0659 |
| LOC642733  | 0.9640 | 1.1197 | 1.0204 | 0.9613 | 1.0163 | 0.0370 |
| LOC1001292 | 0.9517 | 1.0634 | 1.0873 | 0.9630 | 1.0163 | 0.0345 |
| LOC132706  | 1.0813 | 1.0367 | 1.0546 | 0.8927 | 1.0163 | 0.0422 |
| TEKT2      | 0.9012 | 1.2086 | 1.0613 | 0.8943 | 1.0164 | 0.0748 |
| LOC730429  | 0.9610 | 1.0611 | 1.0729 | 0.9704 | 1.0164 | 0.0294 |
| OR10G2     | 1.0615 | 1.1229 | 0.9834 | 0.8977 | 1.0164 | 0.0488 |
| LOC653712  | 0.9057 | 1.1311 | 1.0821 | 0.9466 | 1.0164 | 0.0537 |
| LOC1001347 | 0.9368 | 1.1499 | 1.0138 | 0.9650 | 1.0164 | 0.0473 |
| MIR412     | 1.0564 | 1.0425 | 0.9978 | 0.9689 | 1.0164 | 0.0202 |
| LOC645576  | 0.9222 | 1.0144 | 1.2301 | 0.8988 | 1.0164 | 0.0755 |
| LOC645159  | 0.9008 | 1.1756 | 1.1109 | 0.8782 | 1.0164 | 0.0746 |
| CTXN2      | 0.9250 | 1.1391 | 1.0632 | 0.9384 | 1.0164 | 0.0514 |
| CETP       | 1.0797 | 1.0355 | 1.0018 | 0.9487 | 1.0164 | 0.0277 |
| ARSE       | 1.0545 | 1.0820 | 1.0612 | 0.8681 | 1.0164 | 0.0498 |
| PDHA2      | 0.9706 | 1.1031 | 1.0620 | 0.9300 | 1.0164 | 0.0399 |
| LOC126075  | 0.9290 | 1.2345 | 1.0035 | 0.8988 | 1.0164 | 0.0759 |
| EEFSEC     | 0.9638 | 1.1678 | 1.0380 | 0.8963 | 1.0164 | 0.0582 |
| TEP1       | 0.9834 | 1.1749 | 1.0208 | 0.8867 | 1.0165 | 0.0599 |

|            |        |        |        |        |        |        |
|------------|--------|--------|--------|--------|--------|--------|
| DKK4       | 0.9861 | 1.1380 | 1.0235 | 0.9182 | 1.0165 | 0.0460 |
| SEC14L4    | 0.9491 | 1.1133 | 1.0610 | 0.9425 | 1.0165 | 0.0422 |
| LOC729010  | 1.0527 | 1.1675 | 0.9952 | 0.8504 | 1.0165 | 0.0659 |
| LOC1001306 | 0.9342 | 1.2273 | 0.9989 | 0.9055 | 1.0165 | 0.0729 |
| XIRP2      | 1.0538 | 1.1203 | 0.9434 | 0.9484 | 1.0165 | 0.0430 |
| LOC642846  | 0.9458 | 1.0770 | 1.1341 | 0.9091 | 1.0165 | 0.0533 |
| ZNF470     | 1.0629 | 1.0785 | 1.1064 | 0.8182 | 1.0165 | 0.0667 |
| GPR22      | 0.9588 | 1.0437 | 1.0979 | 0.9656 | 1.0165 | 0.0333 |
| C19orf26   | 0.8535 | 1.0962 | 1.1897 | 0.9266 | 1.0165 | 0.0769 |
| LOC643304  | 1.0575 | 1.1449 | 0.9837 | 0.8799 | 1.0165 | 0.0562 |
| SGCE       | 0.9415 | 1.2509 | 1.0419 | 0.8317 | 1.0165 | 0.0892 |
| MGC4473    | 1.0465 | 1.1816 | 0.9709 | 0.8671 | 1.0165 | 0.0662 |
| ACTN2      | 0.8387 | 1.1972 | 1.0735 | 0.9568 | 1.0165 | 0.0770 |
| LOC1001281 | 1.0185 | 1.0020 | 1.0984 | 0.9472 | 1.0165 | 0.0313 |
| LOC644353  | 0.9444 | 1.1813 | 1.0721 | 0.8684 | 1.0165 | 0.0691 |
| LOC648487  | 0.9591 | 1.1381 | 1.0925 | 0.8765 | 1.0166 | 0.0602 |
| LOC729156  | 1.0121 | 1.1781 | 0.9933 | 0.8827 | 1.0166 | 0.0609 |
| PARD3      | 1.0007 | 1.0396 | 1.0716 | 0.9544 | 1.0166 | 0.0253 |
| SPTLC1     | 0.9470 | 1.3054 | 1.0994 | 0.7145 | 1.0166 | 0.1246 |
| SAP30BP    | 1.0469 | 1.1487 | 0.9800 | 0.8907 | 1.0166 | 0.0544 |
| HIST1H4E   | 0.8807 | 1.3534 | 1.0255 | 0.8066 | 1.0166 | 0.1211 |
| NDUFB5     | 0.7893 | 1.3472 | 1.1005 | 0.8294 | 1.0166 | 0.1301 |
| C4orf31    | 0.9190 | 1.0685 | 1.0385 | 1.0403 | 1.0166 | 0.0332 |
| RPS6       | 0.9526 | 1.1663 | 1.1811 | 0.7664 | 1.0166 | 0.0984 |
| RAB39B     | 0.9896 | 1.1660 | 0.9779 | 0.9329 | 1.0166 | 0.0513 |
| SLC14A2    | 0.9099 | 1.0383 | 1.1256 | 0.9928 | 1.0166 | 0.0450 |
| C21orf119  | 1.1300 | 1.2959 | 0.8909 | 0.7498 | 1.0166 | 0.1217 |
| LOC729372  | 0.7393 | 1.2339 | 1.1051 | 0.9882 | 1.0166 | 0.1052 |
| N4BP1      | 1.0320 | 1.3011 | 0.8635 | 0.8700 | 1.0166 | 0.1025 |
| SLAIN2     | 1.0474 | 1.1734 | 1.0343 | 0.8115 | 1.0166 | 0.0752 |
| POL3S      | 0.8618 | 1.1543 | 1.0794 | 0.9713 | 1.0167 | 0.0638 |
| LOC651711  | 1.0344 | 1.0912 | 1.0523 | 0.8888 | 1.0167 | 0.0443 |
| LOC1001321 | 0.9088 | 1.0071 | 1.1764 | 0.9744 | 1.0167 | 0.0570 |
| NPY        | 0.8979 | 1.0938 | 1.0934 | 0.9817 | 1.0167 | 0.0476 |
| LOC652450  | 1.0293 | 1.0315 | 1.1064 | 0.8997 | 1.0167 | 0.0429 |
| C4orf29    | 0.9046 | 1.1365 | 1.0825 | 0.9434 | 1.0167 | 0.0552 |
| LOC727677  | 0.9499 | 1.0804 | 1.1607 | 0.8760 | 1.0167 | 0.0639 |
| VCX3B      | 0.9465 | 1.1079 | 1.0299 | 0.9826 | 1.0167 | 0.0349 |
| LOC388963  | 1.0020 | 1.0592 | 1.0547 | 0.9512 | 1.0167 | 0.0254 |
| LOC645323  | 0.9116 | 1.2025 | 1.0324 | 0.9204 | 1.0168 | 0.0677 |
| SGCG       | 0.9948 | 1.0386 | 1.0474 | 0.9863 | 1.0168 | 0.0153 |
| PIPOX      | 1.1030 | 1.0267 | 0.9913 | 0.9460 | 1.0168 | 0.0332 |
| PRAMEF11   | 1.0092 | 1.0548 | 0.9874 | 1.0157 | 1.0168 | 0.0141 |
| LSG1       | 0.8597 | 1.4573 | 1.0577 | 0.6924 | 1.0168 | 0.1647 |
| LOC646939  | 0.9325 | 1.0553 | 1.1171 | 0.9622 | 1.0168 | 0.0424 |
| ZBTB7C     | 0.9154 | 1.0925 | 1.1015 | 0.9578 | 1.0168 | 0.0471 |

|            |        |        |        |        |        |        |
|------------|--------|--------|--------|--------|--------|--------|
| SAV1       | 0.9088 | 1.1914 | 1.1862 | 0.7808 | 1.0168 | 0.1027 |
| COMT       | 0.8828 | 1.4484 | 1.0125 | 0.7235 | 1.0168 | 0.1555 |
| IRGQ       | 1.0196 | 1.0061 | 1.0981 | 0.9434 | 1.0168 | 0.0318 |
| PCAF       | 0.8979 | 1.1579 | 1.0456 | 0.9658 | 1.0168 | 0.0559 |
| ADAM29     | 0.9420 | 1.1867 | 1.0268 | 0.9117 | 1.0168 | 0.0616 |
| TTLL1      | 0.9614 | 1.3890 | 0.9513 | 0.7656 | 1.0168 | 0.1320 |
| TRAPPC2P1  | 1.0964 | 1.1931 | 1.0440 | 0.7338 | 1.0168 | 0.0993 |
| SNORD113-9 | 0.9307 | 1.0845 | 1.1025 | 0.9495 | 1.0168 | 0.0446 |
| NHLRC2     | 0.8392 | 1.4931 | 0.9882 | 0.7468 | 1.0169 | 0.1664 |
| OR2V2      | 0.9580 | 1.1841 | 0.9378 | 0.9876 | 1.0169 | 0.0567 |
| PMP2       | 0.9058 | 1.0958 | 1.1664 | 0.8995 | 1.0169 | 0.0675 |
| OSAP       | 0.9689 | 1.1118 | 1.0456 | 0.9412 | 1.0169 | 0.0386 |
| LOC652682  | 0.9284 | 1.2507 | 1.0507 | 0.8376 | 1.0169 | 0.0893 |
| LOC642615  | 0.8416 | 1.3023 | 1.0061 | 0.9176 | 1.0169 | 0.1009 |
| APOBEC2    | 0.9871 | 1.1318 | 0.9735 | 0.9752 | 1.0169 | 0.0384 |
| FAM109A    | 1.0663 | 1.1989 | 0.9827 | 0.8198 | 1.0169 | 0.0794 |
| LOC641953  | 0.9681 | 1.1806 | 1.0158 | 0.9031 | 1.0169 | 0.0593 |
| LOC645686  | 0.9434 | 1.1534 | 1.0293 | 0.9416 | 1.0169 | 0.0499 |
| C16orf11   | 0.9645 | 1.1711 | 1.0242 | 0.9078 | 1.0169 | 0.0566 |
| ZNF20      | 0.9439 | 1.2837 | 0.9678 | 0.8724 | 1.0169 | 0.0912 |
| LRRC2      | 0.9387 | 1.1950 | 0.9910 | 0.9430 | 1.0169 | 0.0605 |
| C9orf86    | 0.9761 | 1.3452 | 0.9269 | 0.8196 | 1.0169 | 0.1142 |
| ERLIN1     | 0.9655 | 1.2074 | 0.9814 | 0.9135 | 1.0169 | 0.0651 |
| LOC648264  | 0.9837 | 1.1046 | 1.0305 | 0.9490 | 1.0170 | 0.0337 |
| FAM25G     | 0.9624 | 1.1151 | 1.0873 | 0.9031 | 1.0170 | 0.0504 |
| LOC441046  | 0.9502 | 1.1836 | 0.9566 | 0.9775 | 1.0170 | 0.0558 |
| ACTL7A     | 0.9774 | 1.1575 | 1.0152 | 0.9178 | 1.0170 | 0.0509 |
| LOC652141  | 1.0343 | 1.0852 | 0.9855 | 0.9630 | 1.0170 | 0.0272 |
| LOC647519  | 1.0487 | 1.0437 | 1.0045 | 0.9712 | 1.0170 | 0.0182 |
| KRTAP10-5  | 1.0258 | 1.1477 | 1.0519 | 0.8427 | 1.0170 | 0.0637 |
| HYMAI      | 0.9801 | 1.0815 | 1.0491 | 0.9574 | 1.0170 | 0.0290 |
| LOC650921  | 0.9117 | 1.1374 | 1.0863 | 0.9327 | 1.0170 | 0.0559 |
| MIR190     | 0.9743 | 1.0405 | 1.1229 | 0.9305 | 1.0170 | 0.0419 |
| ZFAND5     | 0.8405 | 1.3502 | 1.0962 | 0.7812 | 1.0170 | 0.1304 |
| LMO7       | 0.9631 | 1.0788 | 1.0921 | 0.9342 | 1.0170 | 0.0400 |
| PTCH2      | 0.8754 | 1.1370 | 1.0410 | 1.0148 | 1.0170 | 0.0540 |
| LOC646802  | 0.9477 | 1.2093 | 0.9895 | 0.9217 | 1.0171 | 0.0656 |
| LOC1001338 | 1.0105 | 1.0553 | 1.0432 | 0.9592 | 1.0171 | 0.0215 |
| LOC285194  | 0.9553 | 0.9955 | 1.0360 | 1.0815 | 1.0171 | 0.0271 |
| EIF2B2     | 0.8015 | 1.4403 | 1.0316 | 0.7949 | 1.0171 | 0.1514 |
| LOC653264  | 0.9790 | 1.1277 | 1.0185 | 0.9431 | 1.0171 | 0.0400 |
| GBP4       | 1.0695 | 1.1110 | 1.0213 | 0.8665 | 1.0171 | 0.0534 |
| TREML2     | 0.8870 | 1.2002 | 1.0256 | 0.9556 | 1.0171 | 0.0673 |
| MED19      | 0.9141 | 1.4297 | 0.9893 | 0.7352 | 1.0171 | 0.1475 |
| LOC645490  | 0.9864 | 1.0736 | 1.0558 | 0.9527 | 1.0171 | 0.0286 |
| ARC        | 0.9201 | 1.1146 | 1.0866 | 0.9471 | 1.0171 | 0.0489 |

|            |        |        |        |        |        |        |
|------------|--------|--------|--------|--------|--------|--------|
| MMPL1      | 0.8918 | 1.2702 | 0.9736 | 0.9328 | 1.0171 | 0.0860 |
| ETAA1      | 0.9684 | 1.0753 | 1.0787 | 0.9461 | 1.0171 | 0.0349 |
| LOC731408  | 1.0318 | 1.0748 | 0.9986 | 0.9634 | 1.0172 | 0.0237 |
| VASP       | 1.0909 | 1.0271 | 1.0952 | 0.8554 | 1.0172 | 0.0561 |
| SIN3B      | 0.9566 | 1.2272 | 1.1006 | 0.7843 | 1.0172 | 0.0953 |
| SLC26A11   | 1.0194 | 1.2195 | 0.9832 | 0.8466 | 1.0172 | 0.0770 |
| BST1       | 0.9980 | 1.0477 | 1.0339 | 0.9892 | 1.0172 | 0.0140 |
| RNF13      | 0.9734 | 1.2261 | 1.1388 | 0.7304 | 1.0172 | 0.1090 |
| TLR5       | 0.9284 | 1.1580 | 1.0462 | 0.9363 | 1.0172 | 0.0541 |
| TSKS       | 1.0542 | 1.0523 | 1.0129 | 0.9495 | 1.0172 | 0.0245 |
| AYP1p1     | 0.6896 | 1.5135 | 1.0858 | 0.7800 | 1.0172 | 0.1859 |
| HMGB4      | 1.0133 | 1.1124 | 1.0312 | 0.9120 | 1.0172 | 0.0412 |
| EMID2      | 0.9562 | 1.1437 | 1.0791 | 0.8900 | 1.0172 | 0.0575 |
| KRTAP19-5  | 1.0184 | 0.9297 | 1.1247 | 0.9962 | 1.0172 | 0.0405 |
| SNORD2     | 1.0179 | 1.0532 | 1.0255 | 0.9723 | 1.0172 | 0.0168 |
| LOC200420  | 0.9803 | 1.0963 | 1.1102 | 0.8822 | 1.0173 | 0.0536 |
| FMO9P      | 1.0071 | 1.0244 | 1.1125 | 0.9251 | 1.0173 | 0.0384 |
| TMEM176A   | 0.9799 | 1.1084 | 1.1184 | 0.8624 | 1.0173 | 0.0605 |
| C14orf121  | 0.8655 | 1.1189 | 1.0400 | 1.0447 | 1.0173 | 0.0537 |
| XG         | 0.9583 | 1.1628 | 1.0390 | 0.9091 | 1.0173 | 0.0554 |
| OR10V1     | 0.9946 | 1.1527 | 1.0739 | 0.8481 | 1.0173 | 0.0650 |
| RFPL3      | 1.0297 | 1.1676 | 0.9839 | 0.8881 | 1.0173 | 0.0581 |
| FAM36A     | 0.9008 | 1.3132 | 1.0997 | 0.7555 | 1.0173 | 0.1213 |
| LOC1001288 | 0.9285 | 1.1371 | 0.9998 | 1.0039 | 1.0173 | 0.0435 |
| LOC1001296 | 0.9443 | 1.1698 | 1.0221 | 0.9331 | 1.0173 | 0.0545 |
| LOC642849  | 0.9290 | 1.0445 | 1.1710 | 0.9249 | 1.0173 | 0.0582 |
| RIN1       | 0.9052 | 1.1731 | 1.0516 | 0.9395 | 1.0173 | 0.0606 |
| FABP5L2    | 0.8809 | 1.1580 | 1.1127 | 0.9179 | 1.0174 | 0.0692 |
| MASP2      | 0.9789 | 1.1523 | 1.0445 | 0.8937 | 1.0174 | 0.0546 |
| LOC1001311 | 0.9351 | 1.0779 | 1.1297 | 0.9268 | 1.0174 | 0.0511 |
| TIGD6      | 1.0151 | 1.1354 | 1.0519 | 0.8671 | 1.0174 | 0.0560 |
| LOC644399  | 0.9396 | 1.1811 | 1.0377 | 0.9112 | 1.0174 | 0.0609 |
| MIR1255A   | 0.9862 | 1.1507 | 0.9905 | 0.9423 | 1.0174 | 0.0457 |
| LOC644962  | 1.0329 | 1.0813 | 1.0602 | 0.8952 | 1.0174 | 0.0419 |
| WDR27      | 1.0107 | 1.1160 | 1.0344 | 0.9085 | 1.0174 | 0.0427 |
| LAMA2      | 0.9238 | 1.1571 | 1.0524 | 0.9363 | 1.0174 | 0.0548 |
| FARP2      | 1.1159 | 1.1804 | 0.9613 | 0.8120 | 1.0174 | 0.0825 |
| SPRR2C     | 0.9989 | 1.1014 | 1.0470 | 0.9224 | 1.0174 | 0.0380 |
| SLC25A16   | 1.0239 | 1.2092 | 1.0300 | 0.8066 | 1.0174 | 0.0824 |
| PRB4       | 0.9541 | 1.0291 | 1.1335 | 0.9532 | 1.0174 | 0.0426 |
| LOC644961  | 0.9607 | 1.0707 | 1.0348 | 1.0036 | 1.0174 | 0.0234 |
| LOC652759  | 0.9241 | 1.1040 | 1.0934 | 0.9483 | 1.0175 | 0.0472 |
| LOC441395  | 0.9709 | 1.0849 | 1.1149 | 0.8991 | 1.0175 | 0.0502 |
| LOC1001294 | 1.0025 | 1.0677 | 1.0592 | 0.9404 | 1.0175 | 0.0295 |
| SAPS1      | 0.9702 | 1.2487 | 1.0383 | 0.8128 | 1.0175 | 0.0904 |
| LOC340156  | 1.0891 | 1.0736 | 0.9286 | 0.9787 | 1.0175 | 0.0384 |



|           |        |        |        |        |        |        |
|-----------|--------|--------|--------|--------|--------|--------|
| MGC27121  | 0.9332 | 1.1140 | 1.1435 | 0.8792 | 1.0175 | 0.0655 |
| NOP10     | 0.9045 | 1.3687 | 1.0609 | 0.7359 | 1.0175 | 0.1346 |
| S100A12   | 0.9693 | 1.0910 | 1.0687 | 0.9410 | 1.0175 | 0.0367 |
| NID2      | 0.9620 | 1.2031 | 0.9672 | 0.9377 | 1.0175 | 0.0622 |
| NKAIN1    | 0.9561 | 1.1519 | 1.0124 | 0.9497 | 1.0175 | 0.0470 |
| MIR296    | 0.9872 | 1.1241 | 1.0685 | 0.8903 | 1.0175 | 0.0509 |
| LOC650776 | 1.0369 | 0.9337 | 1.0326 | 1.0669 | 1.0175 | 0.0290 |
| HSPB2     | 0.9415 | 1.1271 | 1.0703 | 0.9313 | 1.0175 | 0.0483 |
| LOC646644 | 0.9746 | 1.1006 | 1.0068 | 0.9882 | 1.0175 | 0.0285 |
| SPDYC     | 1.0116 | 0.9755 | 1.1980 | 0.8851 | 1.0176 | 0.0658 |
| UNC5CL    | 0.9578 | 1.1562 | 1.0285 | 0.9278 | 1.0176 | 0.0508 |
| LOC646909 | 0.9498 | 1.1718 | 1.1573 | 0.7913 | 1.0176 | 0.0909 |
| MIR340    | 0.9631 | 1.1469 | 1.0350 | 0.9253 | 1.0176 | 0.0487 |
| LOC643406 | 0.9938 | 1.0851 | 1.0399 | 0.9516 | 1.0176 | 0.0288 |
| DSE       | 0.9759 | 1.1121 | 1.0972 | 0.8852 | 1.0176 | 0.0536 |
| TINF2     | 0.9801 | 1.3442 | 0.9154 | 0.8308 | 1.0176 | 0.1131 |
| OR5K1     | 0.8903 | 1.1394 | 0.9685 | 1.0723 | 1.0176 | 0.0551 |
| GPR42     | 0.9356 | 1.0986 | 1.0737 | 0.9626 | 1.0176 | 0.0403 |
| DYNLL2    | 0.8050 | 1.5414 | 1.0341 | 0.6901 | 1.0176 | 0.1887 |
| LOC652794 | 1.0144 | 1.0955 | 1.0858 | 0.8749 | 1.0176 | 0.0509 |
| SFXN5     | 1.0208 | 1.1802 | 0.9601 | 0.9095 | 1.0176 | 0.0588 |
| WFDC2     | 0.9847 | 1.1109 | 1.0158 | 0.9593 | 1.0177 | 0.0332 |
| LOC642527 | 0.9309 | 1.0428 | 1.1646 | 0.9323 | 1.0177 | 0.0556 |
| C12orf39  | 1.0054 | 1.1546 | 1.0242 | 0.8865 | 1.0177 | 0.0549 |
| LOC643037 | 0.9347 | 1.0369 | 1.1641 | 0.9350 | 1.0177 | 0.0544 |
| RPL15     | 0.9523 | 1.3389 | 1.1223 | 0.6573 | 1.0177 | 0.1438 |
| ANGPTL7   | 0.9996 | 1.0601 | 1.0157 | 0.9953 | 1.0177 | 0.0148 |
| KITLG     | 0.9566 | 1.1541 | 1.0923 | 0.8678 | 1.0177 | 0.0648 |
| LOC390364 | 0.8762 | 1.1557 | 1.0705 | 0.9684 | 1.0177 | 0.0607 |
| LOC440313 | 0.9677 | 1.0971 | 1.0524 | 0.9538 | 1.0177 | 0.0343 |
| ARID3B    | 1.0618 | 1.2340 | 0.9326 | 0.8425 | 1.0177 | 0.0850 |
| IFNA7     | 0.9553 | 1.2428 | 0.9965 | 0.8763 | 1.0177 | 0.0791 |
| LOC645789 | 0.8540 | 1.1805 | 1.1008 | 0.9355 | 1.0177 | 0.0747 |
| LCE4A     | 0.9447 | 1.1370 | 1.0758 | 0.9134 | 1.0177 | 0.0531 |
| PREPL     | 0.8992 | 1.3434 | 1.0955 | 0.7328 | 1.0177 | 0.1314 |
| NLK       | 0.9455 | 1.0854 | 1.1208 | 0.9192 | 1.0177 | 0.0501 |
| GSTTP2    | 0.9835 | 1.1153 | 1.0560 | 0.9161 | 1.0177 | 0.0433 |
| KCNU1     | 0.8821 | 1.1096 | 1.1179 | 0.9614 | 1.0177 | 0.0578 |
| IL17RE    | 0.9562 | 1.1399 | 1.0339 | 0.9410 | 1.0177 | 0.0455 |
| TMX3      | 1.1283 | 1.0372 | 1.0698 | 0.8356 | 1.0177 | 0.0636 |
| MEX3B     | 1.1113 | 1.3011 | 0.9438 | 0.7148 | 1.0178 | 0.1246 |
| LOC149351 | 0.9941 | 1.1764 | 0.9789 | 0.9217 | 1.0178 | 0.0551 |
| CACNA1C   | 0.9762 | 1.1209 | 1.0553 | 0.9186 | 1.0178 | 0.0443 |
| LOC642716 | 0.9565 | 1.0581 | 1.1324 | 0.9241 | 1.0178 | 0.0477 |
| LOC650454 | 0.9997 | 1.1015 | 1.0463 | 0.9237 | 1.0178 | 0.0376 |
| ALS2CL    | 0.9841 | 1.0665 | 1.0407 | 0.9797 | 1.0178 | 0.0214 |

|            |        |        |        |        |        |        |
|------------|--------|--------|--------|--------|--------|--------|
| LRRTM3     | 0.9798 | 1.0868 | 0.9929 | 1.0117 | 1.0178 | 0.0239 |
| LOC644001  | 0.9884 | 1.1482 | 1.1256 | 0.8090 | 1.0178 | 0.0781 |
| MBL1P1     | 0.9030 | 1.1736 | 1.0416 | 0.9529 | 1.0178 | 0.0593 |
| CCNJ       | 0.9931 | 1.1026 | 0.9648 | 1.0107 | 1.0178 | 0.0298 |
| RNU5A      | 0.9088 | 1.2062 | 1.0494 | 0.9068 | 1.0178 | 0.0711 |
| MYO18B     | 0.9649 | 1.0398 | 1.1287 | 0.9379 | 1.0178 | 0.0428 |
| MGC87895   | 0.7177 | 1.2062 | 1.4088 | 0.7386 | 1.0178 | 0.1723 |
| LOC647680  | 0.9744 | 1.1194 | 1.0266 | 0.9508 | 1.0178 | 0.0374 |
| SEC31B     | 1.0070 | 1.1557 | 0.9728 | 0.9359 | 1.0178 | 0.0482 |
| GABRG3     | 1.0045 | 1.0583 | 1.0574 | 0.9512 | 1.0178 | 0.0255 |
| GSX2       | 1.0080 | 1.1054 | 0.9968 | 0.9613 | 1.0179 | 0.0308 |
| LOC340204  | 1.1001 | 1.1273 | 0.9421 | 0.9020 | 1.0179 | 0.0562 |
| LOC1001324 | 1.0397 | 1.0627 | 1.0073 | 0.9618 | 1.0179 | 0.0219 |
| DCTN1      | 0.9448 | 1.4414 | 0.9397 | 0.7457 | 1.0179 | 0.1486 |
| MIR553     | 0.9559 | 1.0793 | 1.0400 | 0.9963 | 1.0179 | 0.0267 |
| LOC651997  | 0.8718 | 1.0949 | 1.0664 | 1.0384 | 1.0179 | 0.0500 |
| MIR1226    | 1.0778 | 1.0123 | 0.9933 | 0.9881 | 1.0179 | 0.0207 |
| SCAMP5     | 0.9540 | 1.1599 | 1.0245 | 0.9332 | 1.0179 | 0.0512 |
| FLRT2      | 0.9831 | 1.1077 | 1.0216 | 0.9592 | 1.0179 | 0.0326 |
| LOC642194  | 0.9737 | 1.0080 | 1.0572 | 1.0329 | 1.0179 | 0.0178 |
| DKK2       | 0.9411 | 1.0757 | 1.0619 | 0.9931 | 1.0179 | 0.0313 |
| ADH7       | 0.9788 | 1.0892 | 1.0541 | 0.9497 | 1.0179 | 0.0324 |
| ANKRD56    | 1.0258 | 1.0921 | 1.0918 | 0.8620 | 1.0179 | 0.0543 |
| ZNF442     | 0.9396 | 1.4227 | 0.9833 | 0.7261 | 1.0179 | 0.1462 |
| ARHGAP15   | 1.0488 | 1.1210 | 1.0936 | 0.8084 | 1.0180 | 0.0714 |
| LOC643630  | 0.9308 | 1.1801 | 1.1146 | 0.8463 | 1.0180 | 0.0778 |
| HERV-FRD   | 0.9949 | 1.0619 | 1.1003 | 0.9148 | 1.0180 | 0.0407 |
| LOC145783  | 0.9538 | 1.2249 | 0.9584 | 0.9348 | 1.0180 | 0.0692 |
| OR6N1      | 1.0085 | 1.0574 | 1.1080 | 0.8981 | 1.0180 | 0.0448 |
| VPS13C     | 0.9625 | 1.2636 | 1.0405 | 0.8054 | 1.0180 | 0.0953 |
| HRNR       | 0.8878 | 1.0664 | 1.1906 | 0.9272 | 1.0180 | 0.0691 |
| OR4K13     | 0.9786 | 1.1601 | 1.0446 | 0.8888 | 1.0180 | 0.0571 |
| LOC729495  | 0.9098 | 1.3710 | 1.1061 | 0.6851 | 1.0180 | 0.1457 |
| ST3GAL2    | 0.9925 | 1.1926 | 0.9798 | 0.9072 | 1.0180 | 0.0611 |
| VIP        | 1.0014 | 1.0926 | 1.0384 | 0.9396 | 1.0180 | 0.0322 |
| CRAT       | 0.9975 | 1.1883 | 0.9981 | 0.8881 | 1.0180 | 0.0624 |
| GPR126     | 0.8397 | 1.6006 | 0.8374 | 0.7944 | 1.0180 | 0.1945 |
| SNORD77    | 0.9591 | 1.1064 | 0.9709 | 1.0358 | 1.0180 | 0.0339 |
| KRT81      | 1.0113 | 1.1030 | 1.0046 | 0.9535 | 1.0181 | 0.0311 |
| CCL4L2     | 1.0837 | 1.0883 | 1.0147 | 0.8858 | 1.0181 | 0.0472 |
| HYAL4      | 1.0180 | 1.2038 | 0.9839 | 0.8668 | 1.0181 | 0.0699 |
| ERCC-00034 | 1.0430 | 1.0714 | 1.1687 | 0.7894 | 1.0181 | 0.0809 |
| LOC1001290 | 0.9038 | 1.2921 | 1.0128 | 0.8639 | 1.0181 | 0.0966 |
| LOC643329  | 0.9046 | 1.1646 | 1.0955 | 0.9079 | 1.0181 | 0.0661 |
| NOLC1      | 0.7948 | 1.4445 | 1.1761 | 0.6571 | 1.0181 | 0.1796 |
| LOC646443  | 0.9178 | 1.1096 | 1.0249 | 1.0203 | 1.0182 | 0.0392 |

|            |        |        |        |        |        |        |
|------------|--------|--------|--------|--------|--------|--------|
| LOC646521  | 1.1132 | 1.0787 | 1.0303 | 0.8504 | 1.0182 | 0.0585 |
| FAM177B    | 0.9978 | 1.0712 | 1.0436 | 0.9602 | 1.0182 | 0.0246 |
| MIR376A2   | 0.9396 | 1.2402 | 0.9598 | 0.9332 | 1.0182 | 0.0742 |
| LOC441326  | 0.9808 | 1.0486 | 1.1242 | 0.9192 | 1.0182 | 0.0441 |
| LOC1001326 | 0.9578 | 1.3036 | 1.0006 | 0.8107 | 1.0182 | 0.1035 |
| DPYSL2     | 0.9394 | 1.4254 | 0.9666 | 0.7415 | 1.0182 | 0.1447 |
| OR10A2     | 0.9517 | 1.0990 | 1.0973 | 0.9249 | 1.0182 | 0.0465 |
| THBS2      | 0.9008 | 1.2284 | 1.0421 | 0.9016 | 1.0182 | 0.0775 |
| OR4C12     | 1.0007 | 1.1562 | 0.9730 | 0.9431 | 1.0182 | 0.0475 |
| LOC1001348 | 0.9151 | 1.1879 | 1.0166 | 0.9533 | 1.0182 | 0.0603 |
| TTC3L      | 0.9499 | 1.2366 | 0.9956 | 0.8909 | 1.0183 | 0.0759 |
| LOC1001345 | 1.0205 | 1.0423 | 0.9661 | 1.0442 | 1.0183 | 0.0182 |
| NOG        | 0.9248 | 1.0369 | 1.1839 | 0.9274 | 1.0183 | 0.0611 |
| LOC650780  | 0.9090 | 1.2504 | 1.0877 | 0.8261 | 1.0183 | 0.0947 |
| LRRC17     | 0.9558 | 1.1395 | 1.0166 | 0.9612 | 1.0183 | 0.0427 |
| LOC1001316 | 0.9589 | 1.1125 | 1.0277 | 0.9740 | 1.0183 | 0.0347 |
| LOC730952  | 0.8996 | 1.2273 | 0.9184 | 1.0279 | 1.0183 | 0.0752 |
| LOC286260  | 0.9351 | 1.1612 | 1.0343 | 0.9426 | 1.0183 | 0.0527 |
| SCARNA9L   | 1.1528 | 1.1040 | 0.9235 | 0.8932 | 1.0184 | 0.0646 |
| LOC727934  | 0.9449 | 1.0999 | 1.1371 | 0.8915 | 1.0184 | 0.0593 |
| MPEG1      | 0.8658 | 1.1542 | 1.0668 | 0.9866 | 1.0184 | 0.0613 |
| KLHL3      | 1.0067 | 1.2158 | 1.0011 | 0.8498 | 1.0184 | 0.0752 |
| LOC642347  | 1.0342 | 1.1299 | 0.9622 | 0.9472 | 1.0184 | 0.0417 |
| LOC1001319 | 0.9925 | 1.1804 | 0.9882 | 0.9124 | 1.0184 | 0.0570 |
| ROCK2      | 0.8053 | 1.5464 | 0.9196 | 0.8023 | 1.0184 | 0.1781 |
| SCARNA20   | 0.9652 | 1.0523 | 1.1067 | 0.9493 | 1.0184 | 0.0371 |
| LOC652326  | 0.8564 | 1.3146 | 1.0387 | 0.8639 | 1.0184 | 0.1073 |
| C1orf204   | 0.8397 | 1.3058 | 1.0472 | 0.8810 | 1.0184 | 0.1058 |
| LUZP1      | 0.7374 | 1.5837 | 1.0253 | 0.7273 | 1.0184 | 0.2007 |
| CLOCK      | 1.0108 | 1.2124 | 0.9667 | 0.8838 | 1.0184 | 0.0698 |
| NEFH       | 1.0528 | 0.9548 | 1.1503 | 0.9158 | 1.0184 | 0.0526 |
| EGR4       | 0.9725 | 1.1346 | 0.9785 | 0.9882 | 1.0185 | 0.0389 |
| CLDN17     | 0.9900 | 1.1190 | 1.0644 | 0.9005 | 1.0185 | 0.0474 |
| C6orf117   | 1.0128 | 1.0242 | 1.0016 | 1.0353 | 1.0185 | 0.0073 |
| LOC643842  | 0.8881 | 1.2310 | 1.0662 | 0.8885 | 1.0185 | 0.0823 |
| PRO1880    | 0.9674 | 1.0985 | 1.0096 | 0.9984 | 1.0185 | 0.0281 |
| HVCN1      | 0.9739 | 1.1162 | 1.0621 | 0.9217 | 1.0185 | 0.0436 |
| LOC650673  | 0.9572 | 1.0805 | 1.1043 | 0.9320 | 1.0185 | 0.0432 |
| LOC728411  | 0.9240 | 1.2549 | 0.9753 | 0.9199 | 1.0185 | 0.0798 |
| DEFB116    | 0.9588 | 1.1007 | 1.0564 | 0.9582 | 1.0185 | 0.0358 |
| LOC1001328 | 0.9219 | 1.1526 | 1.0828 | 0.9167 | 1.0185 | 0.0590 |
| FLJ31813   | 1.0013 | 1.0626 | 1.0390 | 0.9712 | 1.0185 | 0.0202 |
| LOC1001325 | 0.9330 | 1.1728 | 1.0504 | 0.9178 | 1.0185 | 0.0594 |
| LOC388621  | 0.8484 | 1.1559 | 1.4383 | 0.6316 | 1.0185 | 0.1765 |
| APOB48R    | 0.9523 | 1.0845 | 1.0361 | 1.0013 | 1.0185 | 0.0279 |
| LOC440014  | 0.8935 | 1.2521 | 0.9646 | 0.9639 | 1.0185 | 0.0796 |

|            |        |        |        |        |        |        |
|------------|--------|--------|--------|--------|--------|--------|
| LOC286297  | 0.9999 | 1.1029 | 1.0326 | 0.9387 | 1.0186 | 0.0342 |
| CARD6      | 0.9841 | 1.2059 | 0.9809 | 0.9033 | 1.0186 | 0.0652 |
| C5orf32    | 1.0231 | 1.3962 | 0.9694 | 0.6856 | 1.0186 | 0.1460 |
| LOC1001313 | 0.9151 | 1.1464 | 1.0657 | 0.9472 | 1.0186 | 0.0535 |
| PPY2       | 0.9305 | 1.1215 | 1.0936 | 0.9288 | 1.0186 | 0.0517 |
| LOC644452  | 1.1690 | 1.0864 | 0.9583 | 0.8608 | 1.0186 | 0.0682 |
| MGC33407   | 1.0051 | 1.0727 | 1.0248 | 0.9718 | 1.0186 | 0.0211 |
| IRGC       | 1.1099 | 1.1421 | 1.0049 | 0.8175 | 1.0186 | 0.0732 |
| LIPM       | 1.0062 | 1.1760 | 0.8901 | 1.0023 | 1.0186 | 0.0590 |
| RAB6B      | 1.0152 | 1.2657 | 0.9777 | 0.8159 | 1.0186 | 0.0930 |
| MIR144     | 0.9230 | 1.1208 | 0.9960 | 1.0348 | 1.0186 | 0.0412 |
| LOC645225  | 0.9791 | 1.1980 | 1.0298 | 0.8678 | 1.0187 | 0.0687 |
| MIR627     | 0.9699 | 1.2015 | 0.9832 | 0.9200 | 1.0187 | 0.0624 |
| ZCRB1      | 0.9334 | 1.3355 | 1.0489 | 0.7568 | 1.0187 | 0.1215 |
| DHX40P     | 0.8618 | 1.2089 | 1.1580 | 0.8460 | 1.0187 | 0.0958 |
| CAPS       | 0.9752 | 1.1859 | 1.0791 | 0.8346 | 1.0187 | 0.0749 |
| DLX4       | 0.9546 | 1.1002 | 1.0520 | 0.9680 | 1.0187 | 0.0347 |
| LOC388259  | 1.1539 | 1.0331 | 0.9785 | 0.9093 | 1.0187 | 0.0517 |
| NCRNA00087 | 0.9597 | 1.1710 | 1.1259 | 0.8183 | 1.0187 | 0.0808 |
| LOC1001334 | 1.0608 | 1.0789 | 0.9843 | 0.9509 | 1.0187 | 0.0305 |
| MPND       | 1.0099 | 1.3856 | 0.9239 | 0.7555 | 1.0187 | 0.1332 |
| SIGLEC12   | 1.0364 | 1.0686 | 1.0501 | 0.9198 | 1.0187 | 0.0336 |
| PRAP1      | 1.0358 | 1.0977 | 1.0169 | 0.9245 | 1.0187 | 0.0358 |
| CHRNA7     | 0.9974 | 0.9980 | 1.0401 | 1.0393 | 1.0187 | 0.0121 |
| LOC643332  | 0.8704 | 1.2356 | 1.0454 | 0.9236 | 1.0187 | 0.0810 |
| LOC646947  | 0.9104 | 1.0656 | 1.1476 | 0.9514 | 1.0188 | 0.0541 |
| CNOT2      | 0.8264 | 1.7038 | 0.8720 | 0.6728 | 1.0188 | 0.2323 |
| LOC645198  | 1.0748 | 0.9716 | 1.0380 | 0.9907 | 1.0188 | 0.0233 |
| MGC24103   | 1.0089 | 1.0399 | 1.0673 | 0.9590 | 1.0188 | 0.0232 |
| LOC644990  | 0.9837 | 1.1604 | 1.1058 | 0.8253 | 1.0188 | 0.0743 |
| LOC652454  | 0.9195 | 1.1307 | 1.0261 | 0.9990 | 1.0188 | 0.0436 |
| LOC1001298 | 0.9057 | 1.2314 | 1.0989 | 0.8394 | 1.0188 | 0.0897 |
| LOC1001337 | 0.9637 | 1.0133 | 1.0757 | 1.0226 | 1.0188 | 0.0230 |
| LOC644429  | 1.0023 | 1.0437 | 1.0477 | 0.9818 | 1.0188 | 0.0161 |
| LOC651586  | 1.0491 | 1.1586 | 1.0120 | 0.8558 | 1.0189 | 0.0626 |
| BCL11B     | 0.9757 | 1.1034 | 1.0873 | 0.9091 | 1.0189 | 0.0463 |
| VSIG2      | 0.9591 | 1.1475 | 1.0705 | 0.8985 | 1.0189 | 0.0557 |
| PKD2L1     | 1.0027 | 1.0835 | 1.0595 | 0.9299 | 1.0189 | 0.0342 |
| SELL       | 0.9356 | 1.1465 | 1.0715 | 0.9220 | 1.0189 | 0.0543 |
| ZP1        | 1.0301 | 1.1619 | 0.9485 | 0.9352 | 1.0189 | 0.0521 |
| CYLC1      | 0.9322 | 1.0946 | 1.0731 | 0.9757 | 1.0189 | 0.0388 |
| LOC1001332 | 0.9767 | 1.0914 | 1.0542 | 0.9534 | 1.0189 | 0.0323 |
| TTY22      | 0.9882 | 1.1417 | 1.0445 | 0.9013 | 1.0189 | 0.0504 |
| LOC652797  | 1.0577 | 0.9733 | 0.9252 | 1.1195 | 1.0189 | 0.0433 |
| HNF1A      | 1.0909 | 1.1116 | 0.9314 | 0.9419 | 1.0189 | 0.0478 |
| CCNC       | 0.7364 | 1.5072 | 1.0958 | 0.7363 | 1.0189 | 0.1835 |

|            |        |        |        |        |        |        |
|------------|--------|--------|--------|--------|--------|--------|
| AFF1       | 0.8959 | 1.3646 | 0.9869 | 0.8284 | 1.0189 | 0.1197 |
| SLED1      | 0.8756 | 1.2713 | 1.0159 | 0.9130 | 1.0190 | 0.0892 |
| NXF4       | 0.9974 | 1.1090 | 1.0930 | 0.8766 | 1.0190 | 0.0535 |
| LOC643949  | 0.7636 | 1.3526 | 1.1817 | 0.7781 | 1.0190 | 0.1475 |
| C17orf86   | 0.9420 | 1.1058 | 1.0537 | 0.9745 | 1.0190 | 0.0373 |
| LOC283202  | 0.9254 | 1.1175 | 1.0982 | 0.9348 | 1.0190 | 0.0515 |
| OAZ1       | 0.9813 | 1.2152 | 1.1025 | 0.7769 | 1.0190 | 0.0938 |
| FAM132A    | 0.9310 | 1.0763 | 1.0745 | 0.9942 | 1.0190 | 0.0350 |
| LOC652115  | 0.9294 | 1.1411 | 1.1122 | 0.8935 | 1.0190 | 0.0628 |
| CTGF       | 0.9437 | 1.2004 | 1.1087 | 0.8233 | 1.0190 | 0.0841 |
| EPC1       | 0.7997 | 1.3835 | 0.9912 | 0.9017 | 1.0190 | 0.1276 |
| MSTO2P     | 1.0009 | 0.9218 | 1.1656 | 0.9878 | 1.0190 | 0.0518 |
| LOC728139  | 0.8933 | 1.4840 | 1.0444 | 0.6544 | 1.0190 | 0.1745 |
| LOC728791  | 0.8949 | 1.1752 | 1.2281 | 0.7780 | 1.0190 | 0.1086 |
| LOC440888  | 0.9515 | 1.0317 | 1.0287 | 1.0644 | 1.0190 | 0.0239 |
| EPB41L5    | 0.9729 | 1.2190 | 1.0303 | 0.8540 | 1.0191 | 0.0761 |
| LOC645378  | 1.0194 | 1.1363 | 1.1258 | 0.7947 | 1.0191 | 0.0793 |
| TMEM132E   | 0.9698 | 1.0888 | 1.0903 | 0.9273 | 1.0191 | 0.0416 |
| LOC390683  | 0.9501 | 1.1076 | 1.1430 | 0.8756 | 1.0191 | 0.0636 |
| GPR113     | 0.9006 | 1.1732 | 1.0394 | 0.9631 | 1.0191 | 0.0587 |
| LOC1001335 | 1.0824 | 1.0670 | 0.9874 | 0.9395 | 1.0191 | 0.0337 |
| LOC400968  | 0.9799 | 1.0982 | 1.1300 | 0.8682 | 1.0191 | 0.0598 |
| LOC1001336 | 0.9511 | 0.9477 | 1.1795 | 0.9981 | 1.0191 | 0.0547 |
| LOC1001340 | 0.8749 | 1.1394 | 1.0005 | 1.0616 | 1.0191 | 0.0558 |
| PNMA1      | 0.8840 | 1.2346 | 1.1409 | 0.8170 | 1.0191 | 0.1002 |
| MTA1       | 1.0976 | 1.3597 | 0.8997 | 0.7196 | 1.0191 | 0.1373 |
| CDH12P     | 0.8851 | 1.1384 | 1.0809 | 0.9720 | 1.0191 | 0.0564 |
| LOC642624  | 1.0315 | 1.0643 | 1.0056 | 0.9751 | 1.0191 | 0.0190 |
| ZNF434     | 1.0001 | 1.2849 | 1.0135 | 0.7780 | 1.0191 | 0.1038 |
| BEAN       | 1.0544 | 1.0555 | 1.0313 | 0.9352 | 1.0191 | 0.0285 |
| LOC158572  | 0.8775 | 1.1731 | 1.0822 | 0.9436 | 1.0191 | 0.0667 |
| PCDHGB7    | 0.9847 | 1.1005 | 1.0898 | 0.9015 | 1.0191 | 0.0471 |
| HIST1H3C   | 0.9552 | 1.0169 | 1.1701 | 0.9343 | 1.0191 | 0.0533 |
| LOC648855  | 1.1425 | 0.9971 | 1.0372 | 0.8998 | 1.0192 | 0.0502 |
| LOC646429  | 0.9261 | 1.1808 | 1.0429 | 0.9269 | 1.0192 | 0.0605 |
| KIAA0226   | 0.8435 | 1.1677 | 1.1598 | 0.9058 | 1.0192 | 0.0844 |
| RNASE7     | 0.9986 | 1.0503 | 1.0112 | 1.0167 | 1.0192 | 0.0110 |
| LOC440330  | 0.9915 | 0.9290 | 1.1365 | 1.0199 | 1.0192 | 0.0435 |
| LOC1001295 | 0.8805 | 1.1204 | 1.0994 | 0.9766 | 1.0192 | 0.0561 |
| LOC390183  | 0.9982 | 1.0814 | 1.1242 | 0.8731 | 1.0192 | 0.0553 |
| CTCFL      | 0.9469 | 1.0604 | 1.0985 | 0.9711 | 1.0192 | 0.0360 |
| LOC642856  | 0.9971 | 1.0505 | 1.1401 | 0.8894 | 1.0193 | 0.0524 |
| EDNRA      | 0.9546 | 1.1406 | 1.0419 | 0.9400 | 1.0193 | 0.0463 |
| LOC389517  | 0.7767 | 1.4232 | 1.0617 | 0.8155 | 1.0193 | 0.1487 |
| LOC653342  | 0.9032 | 1.2037 | 1.0021 | 0.9681 | 1.0193 | 0.0648 |
| LOC646920  | 0.9793 | 1.1519 | 1.0474 | 0.8986 | 1.0193 | 0.0537 |

|             |        |        |        |        |        |        |
|-------------|--------|--------|--------|--------|--------|--------|
| DSP         | 1.0143 | 1.4381 | 0.8514 | 0.7733 | 1.0193 | 0.1484 |
| KLHDC8B     | 0.9802 | 1.4113 | 0.9443 | 0.7414 | 1.0193 | 0.1408 |
| C3orf1      | 0.9020 | 1.2965 | 1.0451 | 0.8335 | 1.0193 | 0.1024 |
| LOC1001343  | 0.9672 | 1.1305 | 1.0253 | 0.9541 | 1.0193 | 0.0402 |
| LOC139542   | 0.9366 | 1.0793 | 1.1145 | 0.9468 | 1.0193 | 0.0454 |
| SLC22A13    | 0.9432 | 1.1363 | 1.0572 | 0.9405 | 1.0193 | 0.0476 |
| C17orf77    | 1.1453 | 1.0893 | 0.9849 | 0.8578 | 1.0193 | 0.0633 |
| CYSLTR2     | 1.0738 | 1.0672 | 0.9981 | 0.9383 | 1.0193 | 0.0320 |
| LOC642103   | 0.9484 | 1.0830 | 1.1665 | 0.8795 | 1.0193 | 0.0647 |
| LOC402569   | 1.0133 | 1.1032 | 0.9992 | 0.9618 | 1.0194 | 0.0300 |
| LOC1001345  | 0.8630 | 1.1294 | 1.0575 | 1.0275 | 1.0194 | 0.0563 |
| LOC645638   | 0.9633 | 1.1858 | 1.0546 | 0.8738 | 1.0194 | 0.0666 |
| LOC1001311  | 1.0171 | 1.1107 | 1.1790 | 0.7706 | 1.0194 | 0.0893 |
| LOC1001314  | 0.8759 | 1.1324 | 1.1092 | 0.9599 | 1.0194 | 0.0612 |
| PCDHGC3     | 0.9699 | 1.1292 | 1.0748 | 0.9035 | 1.0194 | 0.0508 |
| LOC729412   | 0.9783 | 1.0661 | 1.0483 | 0.9848 | 1.0194 | 0.0222 |
| PTK2        | 0.9451 | 1.3173 | 0.9954 | 0.8198 | 1.0194 | 0.1059 |
| OR2L1P      | 0.9475 | 1.0910 | 1.1112 | 0.9278 | 1.0194 | 0.0475 |
| LOC1001298  | 0.9661 | 1.0167 | 1.1214 | 0.9734 | 1.0194 | 0.0358 |
| CXorf1      | 0.9666 | 1.0077 | 1.1943 | 0.9089 | 1.0194 | 0.0617 |
| POU2F3      | 1.0301 | 1.0945 | 1.0335 | 0.9195 | 1.0194 | 0.0364 |
| FAM99A      | 1.0518 | 1.0503 | 1.0610 | 0.9145 | 1.0194 | 0.0350 |
| MEOX2       | 0.9399 | 1.0918 | 1.0603 | 0.9856 | 1.0194 | 0.0346 |
| FAM73B      | 1.0853 | 1.2242 | 1.0146 | 0.7536 | 1.0194 | 0.0987 |
| MAP3K15     | 0.8997 | 1.1418 | 1.1154 | 0.9208 | 1.0194 | 0.0634 |
| LOC728990   | 1.0286 | 1.1669 | 0.9048 | 0.9774 | 1.0194 | 0.0553 |
| ACCSL       | 0.9559 | 1.1531 | 1.0597 | 0.9090 | 1.0194 | 0.0545 |
| LOC643062   | 0.9308 | 1.0464 | 1.1640 | 0.9365 | 1.0194 | 0.0551 |
| BNIPL       | 1.0122 | 1.1114 | 1.0105 | 0.9436 | 1.0194 | 0.0346 |
| LOC644975   | 1.0121 | 1.1458 | 1.0745 | 0.8453 | 1.0194 | 0.0642 |
| LOC642819   | 0.9792 | 1.1263 | 1.0469 | 0.9255 | 1.0195 | 0.0434 |
| HBP1        | 0.9191 | 1.2544 | 1.0933 | 0.8110 | 1.0195 | 0.0976 |
| TCEB3CL2    | 1.0468 | 1.1004 | 1.1203 | 0.8103 | 1.0195 | 0.0714 |
| SNHG12      | 0.9397 | 1.1984 | 1.0234 | 0.9164 | 1.0195 | 0.0639 |
| CTTNBP2     | 0.9855 | 1.1206 | 1.0404 | 0.9315 | 1.0195 | 0.0404 |
| LOC1001279  | 0.9667 | 1.0163 | 1.1499 | 0.9452 | 1.0195 | 0.0459 |
| SNORD59B    | 1.0136 | 1.1337 | 1.0432 | 0.8876 | 1.0195 | 0.0508 |
| KSR1        | 1.0031 | 1.0289 | 1.1014 | 0.9447 | 1.0195 | 0.0325 |
| SNORD63     | 1.0114 | 1.0260 | 1.0473 | 0.9933 | 1.0195 | 0.0114 |
| LOC650122   | 0.9291 | 1.1181 | 1.1059 | 0.9250 | 1.0195 | 0.0535 |
| LOC651630   | 0.9729 | 1.1490 | 1.0188 | 0.9374 | 1.0195 | 0.0462 |
| LOC652828   | 0.9566 | 1.0412 | 1.1563 | 0.9241 | 1.0195 | 0.0519 |
| TNFSF12-TNF | 0.8803 | 1.1207 | 1.1290 | 0.9483 | 1.0196 | 0.0624 |
| LOC653600   | 0.9270 | 1.0741 | 1.1392 | 0.9381 | 1.0196 | 0.0520 |
| OR9G4       | 0.9897 | 1.1146 | 1.0216 | 0.9524 | 1.0196 | 0.0347 |
| LOC1001289  | 0.9729 | 1.0849 | 1.1276 | 0.8929 | 1.0196 | 0.0534 |

|            |        |        |        |        |        |        |
|------------|--------|--------|--------|--------|--------|--------|
| TAF11      | 0.9295 | 1.0934 | 1.0929 | 0.9626 | 1.0196 | 0.0430 |
| LOC732316  | 0.9667 | 1.2103 | 1.0694 | 0.8320 | 1.0196 | 0.0800 |
| SARDH      | 0.9109 | 1.0518 | 1.1124 | 1.0034 | 1.0196 | 0.0425 |
| ATP6V0E1   | 0.8919 | 1.4292 | 1.1014 | 0.6560 | 1.0196 | 0.1641 |
| FBXO11     | 0.9743 | 1.3054 | 0.9976 | 0.8012 | 1.0196 | 0.1049 |
| MIR30A     | 0.9785 | 1.1510 | 1.0055 | 0.9435 | 1.0196 | 0.0456 |
| PID1       | 0.8670 | 1.1911 | 1.1232 | 0.8972 | 1.0196 | 0.0808 |
| ADPRHL2    | 0.9899 | 1.3378 | 0.9314 | 0.8194 | 1.0196 | 0.1118 |
| SERPINE2   | 0.9612 | 1.3719 | 0.9584 | 0.7870 | 1.0196 | 0.1243 |
| CYP4F22    | 0.9278 | 1.1417 | 1.0376 | 0.9713 | 1.0196 | 0.0465 |
| LOC391165  | 1.0700 | 1.1039 | 1.0907 | 0.8138 | 1.0196 | 0.0689 |
| ERCC-00042 | 0.9888 | 1.0836 | 1.0802 | 0.9259 | 1.0196 | 0.0382 |
| NGEF       | 0.8942 | 1.2203 | 1.0166 | 0.9475 | 1.0197 | 0.0714 |
| LOC645993  | 0.9902 | 1.2166 | 0.9677 | 0.9042 | 1.0197 | 0.0681 |
| LOC732447  | 0.9901 | 1.1725 | 1.0222 | 0.8939 | 1.0197 | 0.0578 |
| FBXW11     | 0.9231 | 1.4211 | 1.0077 | 0.7268 | 1.0197 | 0.1462 |
| WBSCR16    | 0.8892 | 1.4549 | 0.9069 | 0.8276 | 1.0197 | 0.1461 |
| MIR219-2   | 0.9454 | 1.1395 | 1.0906 | 0.9032 | 1.0197 | 0.0566 |
| LOC647334  | 0.9431 | 1.0811 | 1.0377 | 1.0169 | 1.0197 | 0.0288 |
| ASB6       | 1.0474 | 1.1320 | 1.0115 | 0.8879 | 1.0197 | 0.0507 |
| TRPM4      | 0.9579 | 1.4248 | 0.9111 | 0.7850 | 1.0197 | 0.1399 |
| LOC648748  | 1.0943 | 1.0349 | 1.0146 | 0.9350 | 1.0197 | 0.0329 |
| LOC653778  | 0.7995 | 1.4496 | 1.0595 | 0.7702 | 1.0197 | 0.1574 |
| LOC440589  | 1.0406 | 1.0769 | 1.0403 | 0.9211 | 1.0197 | 0.0340 |
| ZDHHC8P    | 1.0113 | 1.1142 | 1.0480 | 0.9055 | 1.0198 | 0.0436 |
| LOC1001315 | 0.9974 | 1.0993 | 1.0314 | 0.9509 | 1.0198 | 0.0312 |
| C15orf55   | 0.9518 | 1.0997 | 1.0780 | 0.9497 | 1.0198 | 0.0401 |
| CNP        | 1.0334 | 1.0859 | 1.0530 | 0.9067 | 1.0198 | 0.0392 |
| LOC136157  | 0.9898 | 1.1293 | 1.0553 | 0.9047 | 1.0198 | 0.0478 |
| LCAT       | 0.9375 | 1.0721 | 1.0424 | 1.0271 | 1.0198 | 0.0290 |
| PDE6G      | 0.8795 | 1.2312 | 1.0623 | 0.9062 | 1.0198 | 0.0812 |
| LOC389072  | 1.0051 | 0.9784 | 1.1297 | 0.9660 | 1.0198 | 0.0375 |
| PA2G4P4    | 1.0032 | 1.1292 | 1.0265 | 0.9203 | 1.0198 | 0.0430 |
| LCE2B      | 0.9801 | 1.1606 | 0.9585 | 0.9800 | 1.0198 | 0.0472 |
| MIR593     | 0.9364 | 1.1410 | 1.1135 | 0.8883 | 1.0198 | 0.0631 |
| DMRTC2     | 1.1297 | 1.0819 | 0.9272 | 0.9405 | 1.0198 | 0.0507 |
| GJB7       | 0.8803 | 0.9532 | 1.2994 | 0.9464 | 1.0198 | 0.0946 |
| PTPN12     | 0.9488 | 1.3397 | 1.0157 | 0.7752 | 1.0198 | 0.1180 |
| LOC650924  | 0.8446 | 1.1908 | 1.1313 | 0.9127 | 1.0199 | 0.0836 |
| MIR655     | 0.9293 | 1.1524 | 1.0155 | 0.9824 | 1.0199 | 0.0476 |
| LAPTM4A    | 0.9510 | 1.3270 | 1.1756 | 0.6258 | 1.0199 | 0.1524 |
| LOC1001280 | 1.0349 | 1.1134 | 1.0500 | 0.8812 | 1.0199 | 0.0493 |
| SNRPE      | 0.9757 | 1.0818 | 1.0725 | 0.9496 | 1.0199 | 0.0336 |
| C2orf67    | 1.0352 | 1.0565 | 1.0215 | 0.9663 | 1.0199 | 0.0193 |
| ESR1       | 1.0274 | 1.1270 | 1.0290 | 0.8963 | 1.0199 | 0.0473 |
| OVCH1      | 1.0072 | 1.0365 | 1.0819 | 0.9542 | 1.0199 | 0.0268 |

|            |        |        |        |        |        |        |
|------------|--------|--------|--------|--------|--------|--------|
| NAT8       | 0.9509 | 1.0360 | 1.1658 | 0.9271 | 1.0199 | 0.0539 |
| KRT15      | 0.8573 | 1.1997 | 1.0513 | 0.9714 | 1.0199 | 0.0719 |
| TKTL1      | 0.9195 | 1.2626 | 0.9450 | 0.9528 | 1.0200 | 0.0812 |
| LOC652840  | 0.9046 | 1.0558 | 1.0955 | 1.0240 | 1.0200 | 0.0411 |
| LOC730302  | 0.9023 | 1.0222 | 1.1273 | 1.0281 | 1.0200 | 0.0460 |
| TNP2       | 0.9007 | 1.0659 | 1.1676 | 0.9456 | 1.0200 | 0.0603 |
| LQK1       | 0.9173 | 1.2416 | 1.1439 | 0.7772 | 1.0200 | 0.1057 |
| LOC390617  | 0.9111 | 1.1131 | 1.0736 | 0.9821 | 1.0200 | 0.0455 |
| LOC1001279 | 1.0415 | 1.0922 | 1.0607 | 0.8856 | 1.0200 | 0.0460 |
| LOC1001287 | 0.9530 | 1.1142 | 1.1469 | 0.8658 | 1.0200 | 0.0666 |
| LOC1001308 | 0.9728 | 1.1881 | 1.0900 | 0.8292 | 1.0200 | 0.0773 |
| LOC645073  | 0.9615 | 1.1309 | 1.0413 | 0.9463 | 1.0200 | 0.0424 |
| C9orf71    | 0.9552 | 1.0989 | 1.0392 | 0.9868 | 1.0200 | 0.0315 |
| STAT6      | 0.9943 | 1.0646 | 1.0897 | 0.9316 | 1.0200 | 0.0357 |
| ZNF738     | 0.9767 | 1.3881 | 1.0147 | 0.7007 | 1.0200 | 0.1412 |
| LOC401497  | 0.8111 | 1.1329 | 1.1766 | 0.9596 | 1.0200 | 0.0840 |
| GPR25      | 1.0146 | 1.0481 | 1.0266 | 0.9909 | 1.0200 | 0.0119 |
| OR52N2     | 1.0243 | 1.2437 | 0.8216 | 0.9906 | 1.0201 | 0.0867 |
| MIR381     | 1.0113 | 1.1175 | 1.0258 | 0.9256 | 1.0201 | 0.0393 |
| MIR197     | 0.9502 | 1.0849 | 1.0199 | 1.0253 | 1.0201 | 0.0275 |
| UBE2L6     | 0.9874 | 1.1298 | 1.0110 | 0.9521 | 1.0201 | 0.0385 |
| LOC1001280 | 0.9980 | 1.0858 | 0.9941 | 1.0025 | 1.0201 | 0.0220 |
| HIST4H4    | 0.8778 | 1.2413 | 1.0614 | 0.8998 | 1.0201 | 0.0843 |
| MIR670     | 1.0947 | 1.0533 | 1.0193 | 0.9130 | 1.0201 | 0.0389 |
| ERCC6      | 0.9452 | 1.2884 | 1.0312 | 0.8155 | 1.0201 | 0.0998 |
| AQP9       | 1.0423 | 1.1168 | 0.9800 | 0.9413 | 1.0201 | 0.0384 |
| LOC728132  | 1.0105 | 1.3050 | 0.9571 | 0.8078 | 1.0201 | 0.1042 |
| ZADH2      | 0.9380 | 1.1978 | 0.9104 | 1.0342 | 1.0201 | 0.0649 |
| LOC650235  | 0.9746 | 1.0613 | 1.1223 | 0.9223 | 1.0201 | 0.0445 |
| RIPK1      | 1.0107 | 1.3392 | 0.9405 | 0.7901 | 1.0201 | 0.1159 |
| TLK2       | 1.0137 | 1.2868 | 0.9721 | 0.8079 | 1.0201 | 0.0994 |
| LOC642956  | 0.9208 | 1.0753 | 1.0814 | 1.0031 | 1.0201 | 0.0376 |
| LOC729809  | 0.9962 | 1.1061 | 0.9800 | 0.9983 | 1.0202 | 0.0289 |
| ACVR2A     | 1.0276 | 1.1505 | 1.0266 | 0.8759 | 1.0202 | 0.0562 |
| LOC391126  | 0.8858 | 1.3095 | 1.2759 | 0.6095 | 1.0202 | 0.1673 |
| LOC648167  | 0.8477 | 1.1498 | 1.1247 | 0.9584 | 1.0202 | 0.0715 |
| rab1c      | 0.9639 | 1.0593 | 1.0149 | 1.0425 | 1.0202 | 0.0209 |
| FAM71D     | 0.9667 | 1.0012 | 1.0674 | 1.0455 | 1.0202 | 0.0226 |
| PRTFDC1    | 1.1109 | 1.1197 | 0.9697 | 0.8804 | 1.0202 | 0.0579 |
| KIAA0415   | 0.9481 | 1.1763 | 1.0431 | 0.9133 | 1.0202 | 0.0588 |
| LOC645367  | 0.9944 | 1.0655 | 1.0864 | 0.9345 | 1.0202 | 0.0347 |
| CST7       | 1.0570 | 1.0939 | 0.8612 | 1.0688 | 1.0202 | 0.0536 |
| C10orf116  | 0.9733 | 1.1559 | 1.0379 | 0.9138 | 1.0202 | 0.0518 |
| LOC650781  | 0.9141 | 1.1460 | 1.1490 | 0.8720 | 1.0202 | 0.0740 |
| LOC1001301 | 0.8897 | 1.2144 | 1.1127 | 0.8643 | 1.0203 | 0.0854 |
| ABCG2      | 0.9007 | 1.1278 | 1.0642 | 0.9882 | 1.0203 | 0.0490 |



|            |        |        |        |        |        |        |
|------------|--------|--------|--------|--------|--------|--------|
| LIPT1      | 0.9637 | 1.2240 | 1.0860 | 0.8074 | 1.0203 | 0.0887 |
| LOC441368  | 0.9911 | 1.1130 | 1.0196 | 0.9573 | 1.0203 | 0.0334 |
| NDRG1      | 1.0572 | 1.5716 | 0.7292 | 0.7231 | 1.0203 | 0.1997 |
| C6orf127   | 0.9662 | 1.0634 | 1.0724 | 0.9790 | 1.0203 | 0.0277 |
| LOC649429  | 0.9344 | 1.0037 | 1.1495 | 0.9935 | 1.0203 | 0.0457 |
| LOC732313  | 0.9827 | 1.0237 | 1.0768 | 0.9979 | 1.0203 | 0.0207 |
| LOC284260  | 0.9525 | 1.0943 | 1.1713 | 0.8630 | 1.0203 | 0.0693 |
| LOC653832  | 0.9538 | 1.1168 | 1.0804 | 0.9302 | 1.0203 | 0.0461 |
| LOC644766  | 0.9582 | 1.0597 | 1.1269 | 0.9364 | 1.0203 | 0.0446 |
| CIT        | 0.9767 | 1.1082 | 1.0354 | 0.9609 | 1.0203 | 0.0334 |
| NUDT16     | 0.9313 | 1.3649 | 1.0664 | 0.7186 | 1.0203 | 0.1353 |
| FBXL2      | 0.8960 | 1.2462 | 1.0646 | 0.8744 | 1.0203 | 0.0865 |
| CD93       | 0.9996 | 1.1309 | 0.9953 | 0.9555 | 1.0203 | 0.0382 |
| C7orf4     | 1.0604 | 1.1407 | 0.9908 | 0.8893 | 1.0203 | 0.0533 |
| OS9        | 0.9389 | 1.2835 | 1.0820 | 0.7769 | 1.0203 | 0.1076 |
| LOC648226  | 1.0504 | 1.1320 | 0.9958 | 0.9031 | 1.0203 | 0.0481 |
| MIR641     | 0.8006 | 1.2138 | 1.1140 | 0.9528 | 1.0203 | 0.0909 |
| KCNN3      | 0.9819 | 1.1082 | 1.0483 | 0.9429 | 1.0203 | 0.0365 |
| LOC1001340 | 0.9595 | 1.2011 | 1.0708 | 0.8498 | 1.0203 | 0.0753 |
| C14orf165  | 1.0064 | 1.1012 | 1.1199 | 0.8539 | 1.0203 | 0.0608 |
| LOC1001296 | 0.9522 | 1.2188 | 1.2500 | 0.6604 | 1.0204 | 0.1373 |
| LOC651787  | 0.9577 | 1.1668 | 1.0459 | 0.9111 | 1.0204 | 0.0562 |
| LOC1001313 | 0.9409 | 1.1328 | 1.0461 | 0.9619 | 1.0205 | 0.0438 |
| LOC1001325 | 0.9343 | 1.2367 | 0.9871 | 0.9237 | 1.0205 | 0.0734 |
| MBD3L5     | 1.1234 | 1.1243 | 1.0513 | 0.7828 | 1.0205 | 0.0810 |
| MIR1297    | 0.8520 | 1.1116 | 1.0860 | 1.0323 | 1.0205 | 0.0585 |
| LOC644456  | 0.9092 | 1.1237 | 1.0741 | 0.9748 | 1.0205 | 0.0483 |
| LOC644629  | 0.8717 | 1.2686 | 0.9679 | 0.9738 | 1.0205 | 0.0859 |
| KIAA0776   | 0.9115 | 1.1257 | 1.1121 | 0.9327 | 1.0205 | 0.0570 |
| DLGAP4     | 0.9176 | 1.2181 | 1.0807 | 0.8658 | 1.0205 | 0.0802 |
| ZNF627     | 1.0361 | 1.2478 | 0.9974 | 0.8009 | 1.0206 | 0.0916 |
| LOC644298  | 1.0467 | 1.1665 | 1.0406 | 0.8285 | 1.0206 | 0.0703 |
| LOC652537  | 0.9576 | 1.2072 | 0.9457 | 0.9717 | 1.0206 | 0.0624 |
| CCDC85A    | 0.9774 | 1.0801 | 1.0774 | 0.9474 | 1.0206 | 0.0341 |
| LOC645676  | 0.9900 | 1.2332 | 1.0406 | 0.8185 | 1.0206 | 0.0853 |
| CYP4F12    | 0.9986 | 1.1454 | 0.9965 | 0.9420 | 1.0206 | 0.0436 |
| WNT5B      | 0.9600 | 1.1090 | 1.0691 | 0.9443 | 1.0206 | 0.0405 |
| LOC1001318 | 0.9659 | 1.2578 | 1.0011 | 0.8577 | 1.0206 | 0.0847 |
| LOC285176  | 0.9649 | 1.1596 | 1.1247 | 0.8333 | 1.0206 | 0.0755 |
| FLJ46026   | 1.0671 | 1.0969 | 1.0233 | 0.8951 | 1.0206 | 0.0445 |
| SNORA37    | 0.9283 | 1.0932 | 1.0647 | 0.9963 | 1.0206 | 0.0369 |
| LOC643906  | 0.9966 | 1.0841 | 1.0910 | 0.9108 | 1.0206 | 0.0424 |
| HEXIM2     | 0.8349 | 1.4154 | 1.0039 | 0.8284 | 1.0206 | 0.1377 |
| TNRC18     | 0.8695 | 1.2592 | 1.0474 | 0.9064 | 1.0206 | 0.0883 |
| LOC1001312 | 0.8919 | 1.2405 | 0.9819 | 0.9683 | 1.0206 | 0.0759 |
| MIR26A1    | 1.0205 | 0.9715 | 1.0789 | 1.0116 | 1.0206 | 0.0222 |

|            |        |        |        |        |        |        |
|------------|--------|--------|--------|--------|--------|--------|
| C17orf102  | 1.0119 | 1.1024 | 1.0257 | 0.9425 | 1.0206 | 0.0328 |
| SYCP2L     | 0.9533 | 1.1654 | 1.0134 | 0.9505 | 1.0207 | 0.0504 |
| OR13J1     | 0.9633 | 1.0411 | 1.0880 | 0.9902 | 1.0207 | 0.0276 |
| IFP38      | 0.8147 | 1.3210 | 1.2665 | 0.6805 | 1.0207 | 0.1604 |
| DNAJC5B    | 0.9258 | 1.0554 | 1.1541 | 0.9473 | 1.0207 | 0.0527 |
| KRT17      | 1.1194 | 1.0574 | 1.0085 | 0.8973 | 1.0207 | 0.0470 |
| IL10RA     | 1.0214 | 1.1333 | 0.9420 | 0.9860 | 1.0207 | 0.0409 |
| LOC648130  | 0.9368 | 1.1526 | 1.0390 | 0.9542 | 1.0207 | 0.0493 |
| ZNF385B    | 0.9152 | 1.1555 | 1.2541 | 0.7579 | 1.0207 | 0.1129 |
| LOC440414  | 0.9213 | 1.0427 | 1.1229 | 0.9957 | 1.0207 | 0.0423 |
| LOC647147  | 0.9948 | 1.1836 | 1.1320 | 0.7723 | 1.0207 | 0.0919 |
| LOC653665  | 1.0417 | 1.1274 | 0.9782 | 0.9356 | 1.0207 | 0.0417 |
| LOC648913  | 1.0105 | 1.0580 | 1.1182 | 0.8961 | 1.0207 | 0.0470 |
| LOC1001329 | 0.9203 | 1.1763 | 0.9996 | 0.9867 | 1.0207 | 0.0547 |
| LOC647589  | 0.9281 | 1.1696 | 0.9858 | 0.9995 | 1.0207 | 0.0520 |
| MIR892A    | 0.9848 | 1.0003 | 1.1164 | 0.9815 | 1.0208 | 0.0321 |
| PHPT1      | 0.9936 | 1.2877 | 1.0735 | 0.7282 | 1.0208 | 0.1156 |
| LAMA3      | 0.9064 | 1.2374 | 1.0996 | 0.8397 | 1.0208 | 0.0908 |
| IFI35      | 1.0204 | 1.3800 | 1.0436 | 0.6390 | 1.0208 | 0.1515 |
| LOC650831  | 0.9490 | 1.0845 | 1.0849 | 0.9646 | 1.0208 | 0.0371 |
| FBXO47     | 1.0534 | 1.1143 | 0.9640 | 0.9514 | 1.0208 | 0.0386 |
| LOC653137  | 0.9405 | 1.1102 | 1.1240 | 0.9084 | 1.0208 | 0.0561 |
| ERCC-00160 | 1.0053 | 1.1138 | 0.9976 | 0.9665 | 1.0208 | 0.0321 |
| LOC653154  | 0.9321 | 1.1137 | 1.0361 | 1.0012 | 1.0208 | 0.0378 |
| MIR24-1    | 1.0352 | 1.0862 | 1.0359 | 0.9258 | 1.0208 | 0.0338 |
| KIAA1841   | 1.0058 | 1.0534 | 1.0845 | 0.9395 | 1.0208 | 0.0316 |
| IFI44      | 0.9425 | 1.1756 | 1.1878 | 0.7773 | 1.0208 | 0.0988 |
| LOC652525  | 1.0791 | 1.0627 | 1.0264 | 0.9150 | 1.0208 | 0.0369 |
| LOC644151  | 0.9702 | 1.0224 | 1.0015 | 1.0893 | 1.0208 | 0.0252 |
| ZNRF4      | 1.0192 | 1.1198 | 0.9876 | 0.9569 | 1.0208 | 0.0354 |
| SNORD44    | 0.9859 | 1.1445 | 0.9884 | 0.9646 | 1.0208 | 0.0416 |
| LOC389457  | 0.9941 | 1.0731 | 1.1290 | 0.8872 | 1.0209 | 0.0524 |
| LOC644773  | 0.9294 | 1.1168 | 1.0628 | 0.9744 | 1.0209 | 0.0423 |
| CCDC69     | 1.0193 | 1.1333 | 1.0864 | 0.8444 | 1.0209 | 0.0633 |
| TMEM30B    | 0.9093 | 1.0968 | 1.0321 | 1.0453 | 1.0209 | 0.0397 |
| LOC1001319 | 0.6565 | 1.1859 | 1.5275 | 0.7137 | 1.0209 | 0.2064 |
| LOC1001280 | 0.9726 | 1.1553 | 0.9965 | 0.9592 | 1.0209 | 0.0455 |
| OAS2       | 0.9977 | 1.0824 | 1.0688 | 0.9347 | 1.0209 | 0.0342 |
| LILRB5     | 0.9819 | 1.1989 | 0.9963 | 0.9066 | 1.0209 | 0.0625 |
| YIPF2      | 0.8548 | 1.2167 | 1.0766 | 0.9355 | 1.0209 | 0.0798 |
| LOC647645  | 1.0443 | 1.1239 | 0.9531 | 0.9624 | 1.0209 | 0.0400 |
| SLC38A5    | 1.0792 | 1.1387 | 1.0057 | 0.8601 | 1.0209 | 0.0601 |
| LOC649548  | 1.0059 | 1.1836 | 1.1861 | 0.7082 | 1.0209 | 0.1124 |
| LOC645104  | 0.9532 | 1.0584 | 1.1023 | 0.9699 | 1.0209 | 0.0356 |
| LOC644929  | 0.9678 | 1.1968 | 1.0555 | 0.8636 | 1.0209 | 0.0705 |
| CCDC144C   | 1.0908 | 1.0427 | 1.0355 | 0.9148 | 1.0209 | 0.0374 |

|            |        |        |        |        |        |        |
|------------|--------|--------|--------|--------|--------|--------|
| LOC645877  | 0.9985 | 1.2468 | 0.9667 | 0.8719 | 1.0210 | 0.0799 |
| LOC646010  | 1.0259 | 1.0464 | 1.1034 | 0.9081 | 1.0210 | 0.0410 |
| LOC649826  | 0.9734 | 1.2581 | 0.9479 | 0.9046 | 1.0210 | 0.0803 |
| LOC1001313 | 1.0184 | 0.9498 | 1.2155 | 0.9003 | 1.0210 | 0.0692 |
| LOC648251  | 1.0518 | 1.1044 | 0.9958 | 0.9320 | 1.0210 | 0.0371 |
| LOC1001346 | 1.0957 | 1.0689 | 1.0668 | 0.8526 | 1.0210 | 0.0565 |
| LOC646127  | 0.9198 | 1.1474 | 1.1532 | 0.8636 | 1.0210 | 0.0756 |
| LOC644371  | 0.9952 | 0.9825 | 1.1281 | 0.9782 | 1.0210 | 0.0359 |
| TERF1      | 0.8772 | 1.1654 | 1.2247 | 0.8168 | 1.0210 | 0.1019 |
| UBR1       | 0.9818 | 1.2038 | 1.0677 | 0.8308 | 1.0210 | 0.0782 |
| SNORD11B   | 0.8552 | 1.2076 | 1.0671 | 0.9544 | 1.0210 | 0.0758 |
| CSGALNACT1 | 1.1310 | 0.9834 | 1.0663 | 0.9034 | 1.0210 | 0.0495 |
| SPTLC3     | 0.8882 | 1.1615 | 1.1445 | 0.8900 | 1.0211 | 0.0763 |
| MYL6B      | 0.8195 | 1.3949 | 1.1223 | 0.7475 | 1.0211 | 0.1487 |
| LOC1001316 | 1.1552 | 0.9936 | 1.1235 | 0.8120 | 1.0211 | 0.0780 |
| LOC729439  | 0.8509 | 1.4867 | 0.9936 | 0.7531 | 1.0211 | 0.1629 |
| OR5AS1     | 0.9624 | 1.1133 | 1.0471 | 0.9615 | 1.0211 | 0.0367 |
| PAR1       | 1.1140 | 1.1110 | 0.9562 | 0.9032 | 1.0211 | 0.0539 |
| GPR142     | 0.9784 | 1.1243 | 1.0817 | 0.9000 | 1.0211 | 0.0507 |
| BLR1       | 0.9828 | 1.1411 | 0.9669 | 0.9936 | 1.0211 | 0.0404 |
| LOC284393  | 1.0172 | 1.1865 | 1.0858 | 0.7951 | 1.0211 | 0.0830 |
| PEG10      | 0.9655 | 1.1546 | 1.0724 | 0.8920 | 1.0211 | 0.0579 |
| ERGIC2     | 0.7145 | 1.0668 | 1.5381 | 0.7652 | 1.0211 | 0.1890 |
| ZNF445     | 0.9359 | 1.2108 | 0.9608 | 0.9770 | 1.0211 | 0.0638 |
| LIMA1      | 1.0253 | 1.3297 | 0.9835 | 0.7461 | 1.0212 | 0.1198 |
| LOC727787  | 0.9315 | 1.1629 | 1.0863 | 0.9040 | 1.0212 | 0.0620 |
| GPR75      | 0.9495 | 1.1247 | 1.0089 | 1.0016 | 1.0212 | 0.0370 |
| LOC645711  | 0.9575 | 1.2047 | 0.9606 | 0.9621 | 1.0212 | 0.0612 |
| LOC1001331 | 0.9508 | 1.1280 | 1.0449 | 0.9611 | 1.0212 | 0.0414 |
| LOC652612  | 0.9584 | 1.2125 | 0.9779 | 0.9360 | 1.0212 | 0.0643 |
| LOC647972  | 0.9973 | 1.1013 | 1.0394 | 0.9468 | 1.0212 | 0.0327 |
| LOC648900  | 0.9872 | 1.1168 | 1.0977 | 0.8832 | 1.0212 | 0.0542 |
| ASB9       | 0.9951 | 1.0278 | 1.0312 | 1.0309 | 1.0213 | 0.0087 |
| LOC441151  | 0.9103 | 1.1140 | 1.0106 | 1.0501 | 1.0213 | 0.0427 |
| ART3       | 1.0134 | 1.0942 | 0.9930 | 0.9845 | 1.0213 | 0.0251 |
| LOC652811  | 1.0228 | 1.1276 | 1.0749 | 0.8598 | 1.0213 | 0.0579 |
| LOC651189  | 1.0604 | 1.0073 | 1.0832 | 0.9344 | 1.0213 | 0.0331 |
| CIB1       | 0.8136 | 1.3390 | 1.1860 | 0.7468 | 1.0213 | 0.1433 |
| LOC441061  | 0.9515 | 1.1533 | 1.0729 | 0.9076 | 1.0213 | 0.0562 |
| LOC647079  | 0.9247 | 1.1422 | 0.9653 | 1.0531 | 1.0213 | 0.0484 |
| LOC1001288 | 0.9146 | 1.2546 | 1.0528 | 0.8634 | 1.0214 | 0.0874 |
| LOC730644  | 0.8889 | 1.1574 | 1.1090 | 0.9301 | 1.0214 | 0.0659 |
| LOC650167  | 0.9451 | 1.0788 | 1.1362 | 0.9253 | 1.0214 | 0.0512 |
| LOC728405  | 0.9611 | 1.1166 | 1.0616 | 0.9462 | 1.0214 | 0.0408 |
| LOC641804  | 0.9631 | 1.1871 | 0.9713 | 0.9641 | 1.0214 | 0.0553 |
| BAT3       | 1.1064 | 1.1896 | 0.9725 | 0.8170 | 1.0214 | 0.0815 |

|            |        |        |        |        |        |        |
|------------|--------|--------|--------|--------|--------|--------|
| LOC652213  | 0.9685 | 1.2052 | 0.9798 | 0.9321 | 1.0214 | 0.0621 |
| LOC54103   | 1.0189 | 1.0529 | 1.0246 | 0.9893 | 1.0214 | 0.0130 |
| MIR20B     | 1.0118 | 0.9954 | 0.9594 | 1.1192 | 1.0214 | 0.0344 |
| CBLN4      | 1.0204 | 1.1072 | 1.0179 | 0.9402 | 1.0214 | 0.0341 |
| LOC646552  | 0.9593 | 1.1076 | 1.0499 | 0.9690 | 1.0214 | 0.0352 |
| NCRNA00168 | 1.0061 | 1.0862 | 1.0980 | 0.8955 | 1.0215 | 0.0467 |
| LOC643972  | 1.0393 | 1.0811 | 1.0272 | 0.9382 | 1.0215 | 0.0301 |
| PIP5K1B    | 1.0506 | 1.0799 | 1.0067 | 0.9487 | 1.0215 | 0.0285 |
| SFRS9      | 0.8205 | 1.5720 | 0.9486 | 0.7448 | 1.0215 | 0.1883 |
| FLJ25006   | 0.9611 | 1.0830 | 1.0721 | 0.9698 | 1.0215 | 0.0325 |
| LOC643870  | 0.8916 | 1.1395 | 1.0636 | 0.9913 | 1.0215 | 0.0528 |
| LOC651790  | 0.9047 | 1.1195 | 1.0713 | 0.9906 | 1.0215 | 0.0471 |
| APM-1      | 1.0397 | 1.1640 | 1.0085 | 0.8739 | 1.0215 | 0.0596 |
| TYR        | 0.8704 | 1.1021 | 1.1689 | 0.9447 | 1.0215 | 0.0689 |
| KRTAP13-3  | 0.9817 | 1.1853 | 1.0211 | 0.8979 | 1.0215 | 0.0603 |
| LOC642985  | 0.9500 | 1.1645 | 0.9903 | 0.9814 | 1.0215 | 0.0484 |
| ERCC-00041 | 0.9328 | 1.2499 | 0.9809 | 0.9225 | 1.0215 | 0.0772 |
| LOC1001300 | 0.9490 | 1.1921 | 1.0542 | 0.8908 | 1.0215 | 0.0661 |
| LOC650815  | 0.9719 | 1.1911 | 1.0082 | 0.9149 | 1.0215 | 0.0597 |
| POPDC2     | 0.9243 | 1.1462 | 1.1689 | 0.8468 | 1.0215 | 0.0802 |
| LOC650146  | 1.0127 | 1.0586 | 1.0866 | 0.9282 | 1.0215 | 0.0347 |
| LOC1001290 | 0.8731 | 1.2065 | 1.0488 | 0.9578 | 1.0215 | 0.0713 |
| LOC643492  | 0.9084 | 1.3165 | 0.9860 | 0.8754 | 1.0216 | 0.1010 |
| LOC731640  | 0.8208 | 1.2217 | 1.3656 | 0.6782 | 1.0216 | 0.1624 |
| CSDA       | 0.8796 | 1.1893 | 1.2991 | 0.7184 | 1.0216 | 0.1345 |
| LOC1001340 | 0.8820 | 1.1568 | 1.0860 | 0.9616 | 1.0216 | 0.0616 |
| LOC1001332 | 0.8611 | 1.0983 | 1.1852 | 0.9418 | 1.0216 | 0.0735 |
| FIBIN      | 1.0310 | 1.0976 | 1.0434 | 0.9144 | 1.0216 | 0.0386 |
| RAB42      | 1.0046 | 1.1434 | 1.0871 | 0.8512 | 1.0216 | 0.0635 |
| VSIG4      | 0.9698 | 1.1164 | 1.0415 | 0.9586 | 1.0216 | 0.0366 |
| NUDT13     | 0.9235 | 1.2001 | 1.1058 | 0.8571 | 1.0216 | 0.0794 |
| LOC1001347 | 1.1850 | 0.9423 | 0.9886 | 0.9706 | 1.0216 | 0.0553 |
| ERCC-00170 | 0.9605 | 1.1457 | 1.0235 | 0.9570 | 1.0216 | 0.0441 |
| NEUROD6    | 0.9421 | 1.1521 | 1.0063 | 0.9862 | 1.0217 | 0.0455 |
| EIF4EBP3   | 0.8701 | 1.5148 | 0.9391 | 0.7627 | 1.0217 | 0.1683 |
| SAPS3      | 1.1193 | 1.3309 | 0.8480 | 0.7886 | 1.0217 | 0.1257 |
| LOC650526  | 0.9043 | 1.1281 | 1.0040 | 1.0502 | 1.0217 | 0.0468 |
| LOC1001320 | 0.9954 | 1.0649 | 1.1165 | 0.9099 | 1.0217 | 0.0448 |
| MGC45491   | 0.9033 | 1.1230 | 0.9904 | 1.0701 | 1.0217 | 0.0480 |
| MIR503     | 0.9435 | 1.0634 | 1.1025 | 0.9774 | 1.0217 | 0.0369 |
| ABCA3      | 0.8996 | 1.3242 | 1.1055 | 0.7577 | 1.0217 | 0.1235 |
| RPLPOP2    | 1.0167 | 1.0515 | 1.0841 | 0.9347 | 1.0217 | 0.0321 |
| CTNNA2     | 0.8631 | 1.3023 | 1.0313 | 0.8902 | 1.0217 | 0.1005 |
| KCNJ16     | 0.8917 | 1.1970 | 1.0217 | 0.9766 | 1.0218 | 0.0643 |
| C5orf23    | 0.9139 | 1.2119 | 1.0531 | 0.9082 | 1.0218 | 0.0717 |
| FAHD2A     | 1.0227 | 1.0987 | 1.0324 | 0.9332 | 1.0218 | 0.0340 |

|            |        |        |        |        |        |        |
|------------|--------|--------|--------|--------|--------|--------|
| PYGM       | 0.9386 | 1.1005 | 1.0239 | 1.0243 | 1.0218 | 0.0331 |
| LOC1001319 | 0.9358 | 1.2137 | 1.1732 | 0.7645 | 1.0218 | 0.1054 |
| LOC728835  | 1.0102 | 1.1835 | 1.0453 | 0.8482 | 1.0218 | 0.0689 |
| LOC1001279 | 0.9286 | 1.2652 | 1.0282 | 0.8654 | 1.0218 | 0.0878 |
| ZNF818     | 1.0297 | 1.0692 | 1.0582 | 0.9302 | 1.0218 | 0.0317 |
| C15orf53   | 0.9789 | 1.1205 | 0.9766 | 1.0113 | 1.0218 | 0.0338 |
| LOC1001315 | 0.8847 | 1.1238 | 1.0774 | 1.0014 | 1.0218 | 0.0522 |
| LOC729047  | 0.9657 | 1.0724 | 1.0168 | 1.0324 | 1.0218 | 0.0221 |
| PP8961     | 1.0868 | 1.0125 | 1.0347 | 0.9533 | 1.0218 | 0.0277 |
| LOC644284  | 0.9908 | 1.1351 | 1.1008 | 0.8608 | 1.0218 | 0.0619 |
| LOC730259  | 1.0421 | 1.1257 | 0.9834 | 0.9364 | 1.0219 | 0.0408 |
| C21orf86   | 0.9799 | 1.0674 | 1.0596 | 0.9806 | 1.0219 | 0.0241 |
| DYNLL1     | 0.8657 | 1.3771 | 0.9798 | 0.8651 | 1.0219 | 0.1214 |
| USP24      | 1.0326 | 1.3441 | 0.9320 | 0.7789 | 1.0219 | 0.1194 |
| LOC1001289 | 0.9587 | 1.1254 | 1.0723 | 0.9313 | 1.0219 | 0.0461 |
| LOC641852  | 1.0178 | 1.1640 | 1.0326 | 0.8731 | 1.0219 | 0.0595 |
| LOC644099  | 1.0000 | 1.0515 | 1.0945 | 0.9416 | 1.0219 | 0.0330 |
| RNASE2     | 1.0024 | 1.0886 | 1.0508 | 0.9458 | 1.0219 | 0.0309 |
| LOC730862  | 0.9503 | 1.1374 | 1.0692 | 0.9308 | 1.0219 | 0.0492 |
| PADI3      | 1.0603 | 1.1221 | 1.0484 | 0.8570 | 1.0219 | 0.0573 |
| LOC1001293 | 0.9939 | 1.1158 | 1.0415 | 0.9366 | 1.0219 | 0.0379 |
| RPH3A      | 0.9281 | 1.1454 | 1.1623 | 0.8520 | 1.0219 | 0.0778 |
| SOST       | 1.0003 | 1.0996 | 1.0507 | 0.9372 | 1.0220 | 0.0348 |
| FZD4       | 0.9963 | 1.2195 | 1.0610 | 0.8110 | 1.0220 | 0.0845 |
| DPRXP4     | 0.9993 | 1.0828 | 1.0255 | 0.9802 | 1.0220 | 0.0223 |
| LOC732436  | 0.9887 | 1.1646 | 1.0249 | 0.9097 | 1.0220 | 0.0533 |
| LOC1001327 | 1.1187 | 1.1264 | 1.0791 | 0.7638 | 1.0220 | 0.0867 |
| LOC283970  | 0.9328 | 1.2170 | 1.0038 | 0.9343 | 1.0220 | 0.0671 |
| GPR55      | 0.9585 | 1.1242 | 1.0631 | 0.9422 | 1.0220 | 0.0433 |
| LOC389141  | 0.9101 | 1.3492 | 1.0176 | 0.8112 | 1.0220 | 0.1169 |
| VPS13A     | 0.9651 | 1.2843 | 1.0105 | 0.8282 | 1.0220 | 0.0956 |
| MAX        | 0.9200 | 1.2178 | 1.0787 | 0.8716 | 1.0220 | 0.0788 |
| LOC730007  | 0.9170 | 1.2266 | 1.0874 | 0.8570 | 1.0220 | 0.0839 |
| LOC1001308 | 0.9931 | 1.0985 | 1.0184 | 0.9781 | 1.0220 | 0.0268 |
| FLJ11235   | 0.9970 | 0.9940 | 1.0720 | 1.0251 | 1.0220 | 0.0181 |
| gm127      | 1.1072 | 0.9958 | 1.1086 | 0.8766 | 1.0220 | 0.0552 |
| C9orf98    | 1.0187 | 1.1254 | 1.0304 | 0.9138 | 1.0220 | 0.0433 |
| NANOS2     | 1.0354 | 1.0634 | 1.0175 | 0.9719 | 1.0221 | 0.0192 |
| LOC1001302 | 0.9301 | 1.1670 | 1.1779 | 0.8134 | 1.0221 | 0.0900 |
| MIR1249    | 0.9704 | 1.0458 | 1.1678 | 0.9044 | 1.0221 | 0.0565 |
| GABRA4     | 0.8952 | 1.0929 | 1.0851 | 1.0151 | 1.0221 | 0.0458 |
| LOC728517  | 0.9272 | 1.0621 | 1.1992 | 0.8999 | 1.0221 | 0.0689 |
| CCDC120    | 0.8485 | 1.3520 | 1.0222 | 0.8657 | 1.0221 | 0.1167 |
| TMEM139    | 0.9954 | 1.1427 | 1.0892 | 0.8611 | 1.0221 | 0.0617 |
| PFN3       | 0.9394 | 1.1358 | 1.0717 | 0.9415 | 1.0221 | 0.0489 |
| WAPAL      | 1.0392 | 1.3580 | 0.9728 | 0.7185 | 1.0221 | 0.1316 |

|            |        |        |        |        |        |        |
|------------|--------|--------|--------|--------|--------|--------|
| RPRD2      | 0.9597 | 1.3127 | 0.9807 | 0.8355 | 1.0221 | 0.1020 |
| LOC729669  | 1.0269 | 1.1841 | 1.0141 | 0.8636 | 1.0222 | 0.0655 |
| POTEA      | 0.9771 | 1.1096 | 1.0933 | 0.9087 | 1.0222 | 0.0480 |
| LOC643265  | 1.0052 | 1.1071 | 1.0278 | 0.9488 | 1.0222 | 0.0328 |
| LOC651060  | 1.0008 | 1.1151 | 1.0751 | 0.8979 | 1.0222 | 0.0477 |
| LOC650712  | 0.9436 | 1.1923 | 0.9891 | 0.9639 | 1.0222 | 0.0574 |
| LOC729368  | 0.9758 | 1.1128 | 1.0792 | 0.9211 | 1.0222 | 0.0446 |
| LOC645144  | 0.9450 | 1.1236 | 1.1026 | 0.9178 | 1.0222 | 0.0529 |
| JAK1       | 1.0005 | 1.0372 | 1.0350 | 1.0162 | 1.0222 | 0.0086 |
| LOC441782  | 0.9732 | 1.0989 | 0.9913 | 1.0258 | 1.0223 | 0.0278 |
| LOC645968  | 0.8801 | 1.3256 | 1.1775 | 0.7059 | 1.0223 | 0.1404 |
| ENTPD1     | 0.9830 | 1.2195 | 1.0186 | 0.8680 | 1.0223 | 0.0732 |
| CYTSB      | 0.8819 | 1.2596 | 1.1063 | 0.8414 | 1.0223 | 0.0982 |
| EHD1       | 0.8080 | 1.5125 | 0.9428 | 0.8260 | 1.0223 | 0.1661 |
| LOC648735  | 0.9913 | 1.0169 | 1.1173 | 0.9638 | 1.0223 | 0.0335 |
| FAM80B     | 1.0785 | 1.1252 | 0.9922 | 0.8935 | 1.0223 | 0.0510 |
| SARM1      | 1.0038 | 1.3809 | 0.8423 | 0.8624 | 1.0223 | 0.1248 |
| OR10G3     | 0.9922 | 1.1357 | 1.0353 | 0.9263 | 1.0224 | 0.0439 |
| LOC647407  | 0.9940 | 1.1058 | 1.0481 | 0.9415 | 1.0224 | 0.0353 |
| OR5H15     | 0.9729 | 1.1670 | 1.0027 | 0.9469 | 1.0224 | 0.0495 |
| LOC649037  | 0.9123 | 1.1134 | 1.1140 | 0.9498 | 1.0224 | 0.0533 |
| LOC642183  | 0.8823 | 1.1395 | 1.1834 | 0.8844 | 1.0224 | 0.0808 |
| LOC729252  | 0.9188 | 1.1215 | 1.0577 | 0.9915 | 1.0224 | 0.0435 |
| CETN3      | 0.8241 | 1.5320 | 1.0198 | 0.7135 | 1.0224 | 0.1813 |
| ABCC12     | 0.9535 | 1.0911 | 1.0934 | 0.9516 | 1.0224 | 0.0403 |
| LOC1001291 | 1.0262 | 1.1277 | 1.0355 | 0.9001 | 1.0224 | 0.0468 |
| LOC729530  | 1.0211 | 1.1365 | 1.0554 | 0.8765 | 1.0224 | 0.0543 |
| KIR2DL4    | 0.9477 | 1.1205 | 1.0654 | 0.9561 | 1.0224 | 0.0423 |
| SLC25A6    | 0.8634 | 1.5200 | 0.9780 | 0.7284 | 1.0224 | 0.1735 |
| PLEKHM3    | 1.0048 | 1.0989 | 1.0892 | 0.8969 | 1.0225 | 0.0469 |
| VDR        | 1.0077 | 1.1868 | 1.0491 | 0.8462 | 1.0225 | 0.0701 |
| LOC1001287 | 0.9573 | 1.1859 | 1.0452 | 0.9015 | 1.0225 | 0.0620 |
| TTLL10     | 1.0209 | 1.1221 | 0.9731 | 0.9738 | 1.0225 | 0.0350 |
| LOC728843  | 0.9216 | 1.0425 | 1.2284 | 0.8975 | 1.0225 | 0.0756 |
| LOC649296  | 0.9313 | 1.0667 | 1.1612 | 0.9307 | 1.0225 | 0.0562 |
| LOC642207  | 0.9696 | 1.1098 | 1.1217 | 0.8889 | 1.0225 | 0.0563 |
| CCDC109A   | 0.9307 | 1.3850 | 0.9963 | 0.7781 | 1.0225 | 0.1292 |
| PPP1R9A    | 0.9501 | 1.1540 | 1.0946 | 0.8915 | 1.0225 | 0.0612 |
| PAPOLB     | 0.9455 | 1.0294 | 1.1506 | 0.9646 | 1.0225 | 0.0463 |
| TMEM119    | 0.9492 | 1.1341 | 1.1016 | 0.9054 | 1.0226 | 0.0561 |
| NXPH1      | 1.0680 | 1.0306 | 1.0560 | 0.9356 | 1.0226 | 0.0300 |
| NPPA       | 0.9405 | 1.1809 | 1.1090 | 0.8599 | 1.0226 | 0.0740 |
| APC2       | 1.0083 | 1.1101 | 1.0254 | 0.9466 | 1.0226 | 0.0337 |
| LOC1001331 | 1.0146 | 1.1280 | 0.9466 | 1.0011 | 1.0226 | 0.0381 |
| SDR9C7     | 0.9068 | 1.0929 | 1.0877 | 1.0029 | 1.0226 | 0.0438 |
| KIAA1586   | 0.9056 | 1.1909 | 1.0881 | 0.9058 | 1.0226 | 0.0707 |

|            |        |        |        |        |        |        |
|------------|--------|--------|--------|--------|--------|--------|
| PRAMEF6    | 1.0176 | 1.1258 | 1.0507 | 0.8964 | 1.0226 | 0.0478 |
| KRT24      | 0.9728 | 1.1565 | 1.0645 | 0.8966 | 1.0226 | 0.0563 |
| CHRNA3     | 1.0011 | 1.1103 | 1.0984 | 0.8807 | 1.0226 | 0.0533 |
| LOC441722  | 0.9497 | 1.0271 | 1.0891 | 1.0247 | 1.0226 | 0.0285 |
| SUPT7L     | 0.9668 | 1.3533 | 1.0360 | 0.7345 | 1.0227 | 0.1277 |
| FLJ45964   | 1.0038 | 1.1075 | 1.0198 | 0.9595 | 1.0227 | 0.0310 |
| LOC1001299 | 1.0005 | 1.1326 | 1.0391 | 0.9185 | 1.0227 | 0.0445 |
| LOC652825  | 1.0738 | 0.9746 | 1.1398 | 0.9024 | 1.0227 | 0.0525 |
| LOC1001285 | 0.9493 | 1.0973 | 1.1174 | 0.9267 | 1.0227 | 0.0493 |
| WWP2       | 0.9379 | 1.2039 | 1.0561 | 0.8928 | 1.0227 | 0.0695 |
| SCRG1      | 0.9582 | 1.1047 | 1.0730 | 0.9548 | 1.0227 | 0.0388 |
| LOC440733  | 0.9880 | 1.2162 | 1.0814 | 0.8051 | 1.0227 | 0.0863 |
| KIR3DL1    | 0.9408 | 1.1116 | 1.0774 | 0.9611 | 1.0227 | 0.0422 |
| LOC645000  | 1.0350 | 1.1874 | 1.0656 | 0.8029 | 1.0227 | 0.0803 |
| OR1L6      | 0.8998 | 1.1725 | 1.0420 | 0.9767 | 1.0227 | 0.0578 |
| LOC390332  | 0.9411 | 1.0500 | 1.0863 | 1.0138 | 1.0228 | 0.0310 |
| TAF1       | 0.9959 | 1.1855 | 1.0103 | 0.8994 | 1.0228 | 0.0596 |
| LOC645522  | 1.0298 | 1.1047 | 1.0940 | 0.8627 | 1.0228 | 0.0559 |
| SFTPA2B    | 1.0093 | 1.0608 | 1.1543 | 0.8668 | 1.0228 | 0.0600 |
| LOC1001322 | 1.0510 | 1.0818 | 1.1700 | 0.7885 | 1.0228 | 0.0821 |
| GTPBP1     | 0.9541 | 1.1206 | 1.0812 | 0.9353 | 1.0228 | 0.0460 |
| LOC730281  | 0.9593 | 1.1398 | 1.0885 | 0.9037 | 1.0228 | 0.0549 |
| FAM129C    | 0.8982 | 1.1638 | 1.1368 | 0.8926 | 1.0228 | 0.0738 |
| FLJ34047   | 0.9852 | 1.1892 | 1.0025 | 0.9144 | 1.0228 | 0.0586 |
| LOC644379  | 0.9951 | 1.0367 | 1.1283 | 0.9312 | 1.0229 | 0.0413 |
| LOC441554  | 0.9945 | 1.0190 | 1.0218 | 1.0562 | 1.0229 | 0.0127 |
| CNTN6      | 1.0842 | 1.0237 | 1.0566 | 0.9270 | 1.0229 | 0.0343 |
| RPL32P3    | 1.0273 | 1.1127 | 1.0214 | 0.9301 | 1.0229 | 0.0373 |
| MESP2      | 0.8818 | 1.2482 | 1.0861 | 0.8755 | 1.0229 | 0.0896 |
| LOC645581  | 0.9812 | 1.1378 | 1.0319 | 0.9408 | 1.0229 | 0.0426 |
| OR5P3      | 0.9602 | 1.1333 | 1.1181 | 0.8800 | 1.0229 | 0.0617 |
| MCAM       | 0.9476 | 1.1227 | 1.0956 | 0.9260 | 1.0230 | 0.0502 |
| LOC731479  | 0.9961 | 1.1742 | 0.9732 | 0.9483 | 1.0230 | 0.0513 |
| ANKRD13B   | 0.9648 | 1.0901 | 1.1136 | 0.9234 | 1.0230 | 0.0466 |
| MFN1       | 1.0494 | 1.2150 | 0.9999 | 0.8276 | 1.0230 | 0.0797 |
| LOC652377  | 0.8850 | 1.2191 | 1.0601 | 0.9277 | 1.0230 | 0.0752 |
| PRKRA      | 0.9246 | 1.2344 | 1.2397 | 0.6933 | 1.0230 | 0.1323 |
| C16orf7    | 1.0684 | 1.1506 | 1.0514 | 0.8216 | 1.0230 | 0.0705 |
| NODAL      | 1.0519 | 0.9068 | 1.0745 | 1.0589 | 1.0230 | 0.0390 |
| SNORA40    | 0.9691 | 1.1274 | 1.0348 | 0.9608 | 1.0230 | 0.0385 |
| LOC1001309 | 0.9070 | 1.0713 | 1.1459 | 0.9679 | 1.0230 | 0.0532 |
| C10orf122  | 0.9690 | 1.1410 | 1.0546 | 0.9274 | 1.0230 | 0.0474 |
| IFNB1      | 1.0136 | 1.1406 | 1.0242 | 0.9138 | 1.0230 | 0.0464 |
| LOC646786  | 1.0264 | 1.0883 | 1.1393 | 0.8382 | 1.0231 | 0.0658 |
| LOC645228  | 1.0097 | 1.0616 | 1.0507 | 0.9702 | 1.0231 | 0.0208 |
| LOC388079  | 1.0481 | 0.9884 | 1.0953 | 0.9606 | 1.0231 | 0.0302 |

|            |        |        |        |        |        |        |
|------------|--------|--------|--------|--------|--------|--------|
| NCR1       | 1.0796 | 0.9852 | 1.0713 | 0.9563 | 1.0231 | 0.0308 |
| LOC729046  | 1.0431 | 1.0772 | 1.0008 | 0.9712 | 1.0231 | 0.0233 |
| CD81       | 0.9545 | 1.3701 | 0.9283 | 0.8395 | 1.0231 | 0.1183 |
| LOC651655  | 0.9494 | 1.1152 | 1.0022 | 1.0256 | 1.0231 | 0.0346 |
| LOC1001311 | 1.0185 | 1.0531 | 1.0738 | 0.9470 | 1.0231 | 0.0278 |
| LOC644351  | 1.0054 | 1.0251 | 1.1030 | 0.9590 | 1.0231 | 0.0300 |
| LOC646030  | 1.0443 | 1.1015 | 1.0622 | 0.8846 | 1.0232 | 0.0477 |
| MIR1302-1  | 1.0080 | 1.0552 | 1.0903 | 0.9391 | 1.0232 | 0.0327 |
| LOC391347  | 1.0033 | 1.0499 | 1.1438 | 0.8957 | 1.0232 | 0.0516 |
| MARLIN1    | 0.9802 | 1.1572 | 1.0371 | 0.9183 | 1.0232 | 0.0508 |
| LRRC55     | 0.9804 | 1.0695 | 1.0240 | 1.0188 | 1.0232 | 0.0183 |
| LOC389111  | 1.0199 | 1.0828 | 1.1223 | 0.8678 | 1.0232 | 0.0559 |
| LOC730176  | 1.0877 | 1.1540 | 1.0407 | 0.8104 | 1.0232 | 0.0746 |
| PACRG      | 1.0091 | 1.1224 | 1.0522 | 0.9090 | 1.0232 | 0.0446 |
| LOC649711  | 1.0114 | 1.0869 | 1.0602 | 0.9344 | 1.0232 | 0.0335 |
| LOC285768  | 0.9929 | 1.1091 | 1.1390 | 0.8519 | 1.0232 | 0.0652 |
| MIR629     | 0.9676 | 1.1470 | 1.0493 | 0.9290 | 1.0232 | 0.0483 |
| OR4F6      | 0.9825 | 1.1456 | 0.9925 | 0.9724 | 1.0232 | 0.0410 |
| MIR556     | 0.9110 | 1.1479 | 1.1521 | 0.8820 | 1.0233 | 0.0734 |
| GALIG      | 0.8877 | 1.1420 | 1.1419 | 0.9214 | 1.0233 | 0.0689 |
| ALDH1A1    | 1.0047 | 1.0947 | 1.0526 | 0.9411 | 1.0233 | 0.0330 |
| TPTE       | 1.0026 | 1.1814 | 0.9838 | 0.9253 | 1.0233 | 0.0552 |
| ADRA1D     | 0.9916 | 1.1367 | 1.0430 | 0.9218 | 1.0233 | 0.0452 |
| TTC23      | 0.9545 | 1.2630 | 1.0442 | 0.8315 | 1.0233 | 0.0910 |
| LOC650154  | 0.9305 | 1.1561 | 1.1164 | 0.8902 | 1.0233 | 0.0662 |
| FAU        | 0.9591 | 1.3247 | 1.0013 | 0.8082 | 1.0233 | 0.1087 |
| DIS3       | 1.0050 | 1.0343 | 1.1027 | 0.9513 | 1.0233 | 0.0315 |
| NSFL1C     | 1.0099 | 1.3374 | 1.0080 | 0.7381 | 1.0234 | 0.1226 |
| SLC24A2    | 0.9396 | 1.1765 | 1.0360 | 0.9413 | 1.0234 | 0.0558 |
| LOC644029  | 0.9290 | 1.2145 | 1.1006 | 0.8495 | 1.0234 | 0.0825 |
| SLITRK2    | 1.0271 | 1.0486 | 1.1340 | 0.8838 | 1.0234 | 0.0519 |
| LOC286310  | 0.9216 | 1.2311 | 1.0437 | 0.8972 | 1.0234 | 0.0763 |
| KRT76      | 0.9617 | 1.0999 | 1.1107 | 0.9212 | 1.0234 | 0.0481 |
| H2AFB3     | 0.9651 | 1.2062 | 1.0878 | 0.8345 | 1.0234 | 0.0799 |
| ZDHHC15    | 1.0572 | 1.0506 | 1.0473 | 0.9385 | 1.0234 | 0.0284 |
| MICALCL    | 0.9686 | 1.1575 | 0.9793 | 0.9883 | 1.0234 | 0.0449 |
| OR5I1      | 0.9481 | 1.1133 | 1.0911 | 0.9413 | 1.0234 | 0.0457 |
| NCSTN      | 1.0209 | 1.3785 | 0.9467 | 0.7478 | 1.0235 | 0.1316 |
| LOC648705  | 0.8708 | 1.1745 | 1.2077 | 0.8409 | 1.0235 | 0.0972 |
| OR51A7     | 0.9803 | 1.1039 | 1.0627 | 0.9469 | 1.0235 | 0.0362 |
| C16orf35   | 0.8323 | 1.3942 | 1.0572 | 0.8102 | 1.0235 | 0.1356 |
| LOC648976  | 1.0560 | 1.0658 | 1.0732 | 0.8990 | 1.0235 | 0.0417 |
| RAB6A      | 1.0714 | 1.1394 | 1.1217 | 0.7615 | 1.0235 | 0.0885 |
| VWA3A      | 0.9864 | 1.2490 | 0.9894 | 0.8692 | 1.0235 | 0.0802 |
| LOC645284  | 0.9267 | 1.2594 | 1.0267 | 0.8811 | 1.0235 | 0.0843 |
| ELP3       | 1.0295 | 1.2560 | 1.0107 | 0.7978 | 1.0235 | 0.0936 |



|            |        |        |        |        |        |        |
|------------|--------|--------|--------|--------|--------|--------|
| RASGRP2    | 1.0847 | 1.0910 | 1.0040 | 0.9145 | 1.0235 | 0.0414 |
| LOC645167  | 0.9149 | 1.2426 | 0.9986 | 0.9381 | 1.0235 | 0.0751 |
| LOC729581  | 0.8942 | 1.1229 | 1.1672 | 0.9099 | 1.0235 | 0.0708 |
| PPP3R2     | 0.9469 | 1.1297 | 1.0890 | 0.9288 | 1.0236 | 0.0503 |
| LOC645694  | 0.9441 | 1.0717 | 1.1105 | 0.9680 | 1.0236 | 0.0401 |
| TBC1D12    | 1.0273 | 1.1291 | 1.0299 | 0.9081 | 1.0236 | 0.0452 |
| LOC652536  | 1.0184 | 1.0930 | 1.0394 | 0.9436 | 1.0236 | 0.0310 |
| CDK2AP2    | 1.0543 | 1.3174 | 1.0151 | 0.7077 | 1.0236 | 0.1249 |
| KCNA10     | 0.9240 | 1.1438 | 1.1013 | 0.9253 | 1.0236 | 0.0578 |
| SLC44A2    | 1.0372 | 1.2737 | 1.0363 | 0.7474 | 1.0236 | 0.1077 |
| SHARPIN    | 0.8982 | 1.4713 | 0.9653 | 0.7598 | 1.0237 | 0.1552 |
| MIR449B    | 0.9753 | 1.1317 | 1.0430 | 0.9446 | 1.0237 | 0.0415 |
| C14orf132  | 1.2123 | 1.2413 | 0.8665 | 0.7746 | 1.0237 | 0.1189 |
| OR8U8      | 1.0797 | 1.0326 | 1.1332 | 0.8492 | 1.0237 | 0.0617 |
| LOC643834  | 0.9880 | 1.0997 | 1.0658 | 0.9413 | 1.0237 | 0.0361 |
| LOC1001337 | 0.9834 | 1.0330 | 1.1223 | 0.9560 | 1.0237 | 0.0365 |
| FRG2C      | 0.9222 | 1.2107 | 0.9978 | 0.9642 | 1.0237 | 0.0642 |
| SLC35D1    | 1.0147 | 1.1018 | 1.0258 | 0.9526 | 1.0237 | 0.0306 |
| C10orf12   | 0.9049 | 1.2211 | 1.0776 | 0.8914 | 1.0237 | 0.0783 |
| INPP5K     | 0.8659 | 1.3541 | 1.0670 | 0.8080 | 1.0238 | 0.1233 |
| LOC440082  | 1.0055 | 1.1197 | 1.0755 | 0.8944 | 1.0238 | 0.0491 |
| LOC642140  | 0.9417 | 1.0131 | 1.1497 | 0.9906 | 1.0238 | 0.0445 |
| LOC401399  | 0.8836 | 1.1640 | 1.1345 | 0.9132 | 1.0238 | 0.0729 |
| LOC440005  | 0.9008 | 1.1488 | 1.0812 | 0.9645 | 1.0238 | 0.0560 |
| MIR1296    | 1.0302 | 1.0229 | 1.0713 | 0.9709 | 1.0238 | 0.0206 |
| LOC652077  | 0.9736 | 1.0774 | 1.1928 | 0.8515 | 1.0238 | 0.0728 |
| LOC1001324 | 0.9287 | 1.1192 | 1.1288 | 0.9187 | 1.0238 | 0.0579 |
| CACNA2D2   | 0.9851 | 1.1919 | 1.0811 | 0.8373 | 1.0238 | 0.0752 |
| LOC649076  | 0.9053 | 1.1809 | 1.1503 | 0.8590 | 1.0239 | 0.0826 |
| PPAP2B     | 1.0388 | 1.1473 | 1.0831 | 0.8264 | 1.0239 | 0.0695 |
| LOC1001303 | 0.9233 | 1.1595 | 1.1233 | 0.8894 | 1.0239 | 0.0686 |
| LOC1001290 | 1.0206 | 1.0080 | 1.1485 | 0.9184 | 1.0239 | 0.0474 |
| HILS1      | 0.8531 | 1.3436 | 0.9992 | 0.8996 | 1.0239 | 0.1108 |
| LOC645089  | 1.0632 | 1.1088 | 0.9969 | 0.9267 | 1.0239 | 0.0397 |
| LOC651686  | 0.9732 | 1.1543 | 1.0193 | 0.9488 | 1.0239 | 0.0458 |
| KCNJ2      | 0.9083 | 1.0602 | 1.2175 | 0.9097 | 1.0239 | 0.0737 |
| LOC649346  | 0.9474 | 1.1574 | 1.0246 | 0.9662 | 1.0239 | 0.0474 |
| CACHD1     | 0.9526 | 1.1032 | 1.1134 | 0.9266 | 1.0239 | 0.0490 |
| MYBPH      | 0.8958 | 1.1189 | 1.1056 | 0.9754 | 1.0239 | 0.0536 |
| SNX25      | 0.9690 | 1.3389 | 0.9844 | 0.8035 | 1.0239 | 0.1127 |
| SLC38A3    | 0.8288 | 1.2695 | 1.0325 | 0.9652 | 1.0240 | 0.0922 |
| C20orf175  | 1.0095 | 1.0657 | 1.1258 | 0.8950 | 1.0240 | 0.0491 |
| WBP2       | 0.8848 | 1.3132 | 1.1170 | 0.7811 | 1.0240 | 0.1192 |
| PIP        | 0.9611 | 1.1061 | 1.0215 | 1.0075 | 1.0240 | 0.0302 |
| LOC1001305 | 0.9836 | 1.1394 | 1.0074 | 0.9657 | 1.0240 | 0.0394 |
| RGS1       | 1.1161 | 1.0384 | 1.0313 | 0.9104 | 1.0240 | 0.0425 |

|             |        |        |        |        |        |        |
|-------------|--------|--------|--------|--------|--------|--------|
| FLJ20444    | 0.9012 | 1.3365 | 1.0131 | 0.8454 | 1.0240 | 0.1098 |
| SNORD76     | 0.9188 | 1.1356 | 1.1405 | 0.9014 | 1.0241 | 0.0659 |
| SLC45A4     | 0.9845 | 1.2613 | 0.9220 | 0.9284 | 1.0241 | 0.0803 |
| DAP3        | 0.8331 | 1.4971 | 1.0454 | 0.7207 | 1.0241 | 0.1714 |
| NHLH1       | 1.0054 | 1.0086 | 1.1034 | 0.9789 | 1.0241 | 0.0273 |
| LOC1001340  | 1.0935 | 1.0962 | 1.0319 | 0.8747 | 1.0241 | 0.0520 |
| LOC644808   | 0.9054 | 1.1588 | 1.0255 | 1.0067 | 1.0241 | 0.0521 |
| C6orf170    | 0.9852 | 1.1427 | 1.0970 | 0.8715 | 1.0241 | 0.0607 |
| WDR69       | 0.8512 | 1.1270 | 1.1591 | 0.9590 | 1.0241 | 0.0724 |
| DNAJB7      | 0.9916 | 1.1757 | 1.0363 | 0.8927 | 1.0241 | 0.0588 |
| EXTL3       | 1.0876 | 1.1495 | 0.9654 | 0.8939 | 1.0241 | 0.0578 |
| LOC642852   | 0.9800 | 1.1832 | 0.9511 | 0.9821 | 1.0241 | 0.0535 |
| SNORD89     | 0.8429 | 1.3135 | 1.1594 | 0.7806 | 1.0241 | 0.1272 |
| STARD6      | 1.0809 | 1.0844 | 1.0802 | 0.8513 | 1.0242 | 0.0576 |
| ZNF271      | 0.8294 | 1.4030 | 0.9753 | 0.8892 | 1.0242 | 0.1298 |
| C15orf56    | 1.0466 | 1.1773 | 0.9464 | 0.9265 | 1.0242 | 0.0574 |
| LOC644137   | 1.0141 | 1.0301 | 1.1494 | 0.9032 | 1.0242 | 0.0504 |
| LOC440737   | 0.7266 | 1.2893 | 1.1864 | 0.8946 | 1.0242 | 0.1297 |
| LOC388938   | 1.1275 | 1.1486 | 0.9784 | 0.8425 | 1.0242 | 0.0714 |
| MAP7D1      | 0.9235 | 1.4321 | 0.9946 | 0.7467 | 1.0242 | 0.1456 |
| NBR2        | 1.0663 | 1.1468 | 1.1747 | 0.7091 | 1.0242 | 0.1075 |
| MIR2117     | 1.0160 | 1.0643 | 1.0742 | 0.9425 | 1.0242 | 0.0301 |
| C1orf104    | 1.0005 | 1.1755 | 1.0198 | 0.9013 | 1.0243 | 0.0567 |
| AKR1C4      | 0.9009 | 1.1990 | 1.0632 | 0.9340 | 1.0243 | 0.0680 |
| DZIP3       | 0.9451 | 1.1701 | 0.9951 | 0.9868 | 1.0243 | 0.0498 |
| PAWR        | 0.8640 | 1.1380 | 1.1413 | 0.9538 | 1.0243 | 0.0691 |
| DKFZP547L1: | 0.9912 | 1.0672 | 1.0417 | 0.9970 | 1.0243 | 0.0182 |
| LOC652801   | 0.9389 | 1.1562 | 1.1217 | 0.8804 | 1.0243 | 0.0676 |
| SLC17A9     | 0.8503 | 1.1599 | 1.1356 | 0.9514 | 1.0243 | 0.0744 |
| LOC285299   | 0.9911 | 1.1596 | 1.0197 | 0.9268 | 1.0243 | 0.0491 |
| LOC441056   | 1.0906 | 0.9673 | 1.0477 | 0.9917 | 1.0243 | 0.0278 |
| IMPACT      | 1.0144 | 1.1586 | 1.0562 | 0.8681 | 1.0243 | 0.0603 |
| LOC1001342  | 0.9100 | 1.0422 | 1.1603 | 0.9849 | 1.0243 | 0.0528 |
| GRIN2D      | 1.0513 | 1.1305 | 1.0156 | 0.9000 | 1.0244 | 0.0479 |
| LOC442049   | 0.9000 | 1.2215 | 1.0841 | 0.8919 | 1.0244 | 0.0793 |
| RUNDC3A     | 0.9564 | 1.2312 | 1.0796 | 0.8304 | 1.0244 | 0.0857 |
| SLIT2       | 0.9431 | 1.1917 | 1.0078 | 0.9550 | 1.0244 | 0.0575 |
| LOC390738   | 0.8677 | 1.1481 | 1.1501 | 0.9317 | 1.0244 | 0.0732 |
| CD53        | 0.9970 | 1.1431 | 1.0234 | 0.9341 | 1.0244 | 0.0438 |
| LOC1001308  | 0.9193 | 1.0878 | 1.0646 | 1.0260 | 1.0244 | 0.0373 |
| GABARAPL1   | 1.0819 | 1.2683 | 0.9503 | 0.7972 | 1.0244 | 0.1000 |
| LOC732450   | 1.0439 | 1.0383 | 1.0727 | 0.9428 | 1.0244 | 0.0282 |
| MAGEB3      | 1.0111 | 1.1603 | 1.0194 | 0.9069 | 1.0244 | 0.0520 |
| FTSJ3       | 1.0115 | 1.4685 | 0.8525 | 0.7653 | 1.0244 | 0.1566 |
| LOC441136   | 0.9773 | 1.1771 | 0.9803 | 0.9632 | 1.0245 | 0.0510 |
| LEREPO4     | 1.0273 | 1.0516 | 1.0749 | 0.9441 | 1.0245 | 0.0285 |

|            |        |        |        |        |        |        |
|------------|--------|--------|--------|--------|--------|--------|
| PCDHGA4    | 0.9807 | 1.0533 | 1.0996 | 0.9642 | 1.0245 | 0.0317 |
| SOX1       | 0.9923 | 1.1384 | 1.0478 | 0.9194 | 1.0245 | 0.0462 |
| PKD1L3     | 0.9008 | 1.0910 | 0.9482 | 1.1579 | 1.0245 | 0.0601 |
| HIVEP2     | 0.8022 | 1.3757 | 1.0746 | 0.8454 | 1.0245 | 0.1315 |
| LOC1001909 | 1.0060 | 1.1384 | 1.0196 | 0.9340 | 1.0245 | 0.0424 |
| RPS2       | 0.9668 | 1.3217 | 1.0163 | 0.7933 | 1.0245 | 0.1100 |
| LOC648424  | 0.9107 | 1.1542 | 1.0080 | 1.0251 | 1.0245 | 0.0500 |
| LOC440335  | 0.9699 | 1.0604 | 1.0638 | 1.0040 | 1.0245 | 0.0228 |
| NFKBIA     | 0.8378 | 1.5854 | 1.0178 | 0.6571 | 1.0245 | 0.2009 |
| SAPS2      | 0.8424 | 1.3020 | 1.1204 | 0.8333 | 1.0245 | 0.1140 |
| LOC442406  | 0.9338 | 1.1213 | 1.1317 | 0.9115 | 1.0246 | 0.0591 |
| LOC652128  | 0.8461 | 1.1254 | 1.1213 | 1.0054 | 1.0246 | 0.0657 |
| GABRA6     | 0.9595 | 1.3579 | 0.9414 | 0.8395 | 1.0246 | 0.1142 |
| C16orf55   | 1.0095 | 1.1580 | 1.0004 | 0.9304 | 1.0246 | 0.0479 |
| LOC729383  | 0.8866 | 1.2028 | 1.1004 | 0.9085 | 1.0246 | 0.0764 |
| MAGEL2     | 0.8407 | 1.3756 | 0.9834 | 0.8986 | 1.0246 | 0.1206 |
| LOC653428  | 1.0072 | 1.1494 | 0.9813 | 0.9605 | 1.0246 | 0.0427 |
| LOC644257  | 0.9204 | 1.2293 | 1.0109 | 0.9379 | 1.0246 | 0.0710 |
| LOC401602  | 1.0573 | 1.0723 | 1.1014 | 0.8674 | 1.0246 | 0.0532 |
| RAB5C      | 0.8558 | 1.5929 | 0.9680 | 0.6818 | 1.0246 | 0.1984 |
| PRND       | 0.9751 | 1.0854 | 1.1136 | 0.9244 | 1.0247 | 0.0448 |
| LOC338797  | 0.9898 | 1.1227 | 1.0938 | 0.8923 | 1.0247 | 0.0525 |
| FLJ77644   | 0.9030 | 1.0745 | 1.0775 | 1.0436 | 1.0247 | 0.0413 |
| RAB4B      | 0.8895 | 1.1870 | 1.2296 | 0.7925 | 1.0247 | 0.1082 |
| UBQLN3     | 0.9597 | 1.1206 | 1.0343 | 0.9841 | 1.0247 | 0.0355 |
| SLC5A1     | 0.9815 | 1.1303 | 1.0832 | 0.9038 | 1.0247 | 0.0509 |
| SYT17      | 0.9545 | 1.0733 | 1.1434 | 0.9277 | 1.0247 | 0.0507 |
| CCDC151    | 1.0235 | 1.0644 | 1.1164 | 0.8945 | 1.0247 | 0.0474 |
| TCN1       | 1.0521 | 1.0526 | 1.0159 | 0.9783 | 1.0247 | 0.0177 |
| LOC649993  | 1.0487 | 1.1357 | 0.9789 | 0.9356 | 1.0247 | 0.0437 |
| LY6G6E     | 1.0782 | 1.0577 | 1.1021 | 0.8611 | 1.0248 | 0.0553 |
| HPVC1      | 0.9901 | 1.1810 | 0.9838 | 0.9441 | 1.0248 | 0.0531 |
| TMEM16B    | 0.9114 | 1.1809 | 1.0164 | 0.9906 | 1.0248 | 0.0566 |
| LOC647326  | 0.9910 | 1.1842 | 1.0722 | 0.8517 | 1.0248 | 0.0700 |
| LOC651373  | 0.9621 | 1.0822 | 1.0683 | 0.9867 | 1.0248 | 0.0297 |
| CIB3       | 0.9363 | 1.1521 | 0.9995 | 1.0113 | 1.0248 | 0.0455 |
| LOC1001338 | 0.9048 | 1.4107 | 1.0275 | 0.7563 | 1.0248 | 0.1401 |
| TMEM63C    | 0.8315 | 1.2678 | 1.0916 | 0.9083 | 1.0248 | 0.0977 |
| DDX20      | 0.9862 | 1.0423 | 1.1256 | 0.9452 | 1.0248 | 0.0390 |
| SSX8       | 1.0124 | 1.1197 | 1.0437 | 0.9236 | 1.0248 | 0.0406 |
| LOC197350  | 1.0175 | 1.2074 | 0.9321 | 0.9423 | 1.0248 | 0.0638 |
| OR6C70     | 0.9881 | 1.1149 | 1.0848 | 0.9117 | 1.0248 | 0.0464 |
| NDFIP2     | 0.8025 | 1.6158 | 1.0030 | 0.6782 | 1.0249 | 0.2080 |
| DTX3       | 0.9656 | 1.1085 | 1.0604 | 0.9650 | 1.0249 | 0.0358 |
| NR1D2      | 0.8859 | 1.1598 | 1.1430 | 0.9110 | 1.0249 | 0.0733 |
| LYSMD4     | 0.9974 | 1.2809 | 1.0378 | 0.7835 | 1.0249 | 0.1020 |

|            |        |        |        |        |        |        |
|------------|--------|--------|--------|--------|--------|--------|
| LOC1001344 | 0.9682 | 1.1822 | 1.0507 | 0.8984 | 1.0249 | 0.0610 |
| HELQ       | 1.0071 | 1.1926 | 1.0650 | 0.8348 | 1.0249 | 0.0743 |
| LOC729351  | 1.0153 | 1.1051 | 1.0413 | 0.9380 | 1.0249 | 0.0346 |
| UBE2E1     | 0.8566 | 1.3973 | 1.1721 | 0.6736 | 1.0249 | 0.1613 |
| GRM8       | 1.0165 | 1.0976 | 0.9921 | 0.9934 | 1.0249 | 0.0249 |
| SYT7       | 1.0575 | 1.2592 | 0.9402 | 0.8428 | 1.0249 | 0.0896 |
| LOC1001330 | 1.0221 | 1.0438 | 1.0359 | 0.9978 | 1.0249 | 0.0101 |
| FLJ16171   | 0.9842 | 1.1080 | 1.1464 | 0.8611 | 1.0249 | 0.0646 |
| LOC1001319 | 1.0705 | 1.1163 | 1.0136 | 0.8994 | 1.0249 | 0.0468 |
| IL19       | 0.9501 | 1.1295 | 1.0653 | 0.9549 | 1.0249 | 0.0439 |
| EMX2OS     | 0.8029 | 1.3724 | 1.0291 | 0.8954 | 1.0249 | 0.1248 |
| EDC3       | 1.0097 | 1.2752 | 1.0381 | 0.7767 | 1.0249 | 0.1019 |
| OR1A2      | 0.9850 | 1.1603 | 1.0389 | 0.9156 | 1.0249 | 0.0517 |
| HLA-DQB2   | 1.0170 | 1.0684 | 0.9512 | 1.0632 | 1.0249 | 0.0272 |
| LOC285053  | 0.8356 | 1.4197 | 1.0766 | 0.7679 | 1.0249 | 0.1473 |
| LOC729667  | 0.9819 | 1.2438 | 1.0256 | 0.8485 | 1.0250 | 0.0821 |
| LOC643176  | 0.9605 | 1.0826 | 1.1093 | 0.9473 | 1.0250 | 0.0414 |
| CD226      | 0.9512 | 1.1004 | 1.1697 | 0.8785 | 1.0250 | 0.0668 |
| LOC728640  | 0.8304 | 1.4749 | 0.9497 | 0.8449 | 1.0250 | 0.1523 |
| PLEKHA2    | 0.9478 | 1.2205 | 1.0454 | 0.8862 | 1.0250 | 0.0729 |
| C15orf37   | 0.9080 | 1.0931 | 1.0617 | 1.0371 | 1.0250 | 0.0406 |
| EME2       | 0.9987 | 1.0856 | 1.1353 | 0.8803 | 1.0250 | 0.0559 |
| LOC340598  | 1.0327 | 1.2171 | 1.0706 | 0.7795 | 1.0250 | 0.0910 |
| LOC440508  | 1.0239 | 1.1431 | 0.9319 | 1.0011 | 1.0250 | 0.0439 |
| APOC2      | 0.8374 | 1.3219 | 0.9504 | 0.9903 | 1.0250 | 0.1041 |
| LOC1001300 | 1.0165 | 1.0303 | 1.1609 | 0.8926 | 1.0251 | 0.0548 |
| EPPK1      | 1.0945 | 1.0047 | 1.0297 | 0.9714 | 1.0251 | 0.0260 |
| OR52W1     | 0.9528 | 1.1387 | 0.9365 | 1.0724 | 1.0251 | 0.0485 |
| SNHG10     | 1.0333 | 1.0684 | 1.0216 | 0.9771 | 1.0251 | 0.0188 |
| TLR2       | 0.9528 | 1.0141 | 1.1801 | 0.9534 | 1.0251 | 0.0536 |
| ASL        | 0.9778 | 1.1028 | 1.0856 | 0.9343 | 1.0251 | 0.0410 |
| C8orf80    | 0.8762 | 1.1647 | 1.1362 | 0.9235 | 1.0251 | 0.0732 |
| OR5B3      | 0.9847 | 1.1089 | 1.0943 | 0.9126 | 1.0251 | 0.0466 |
| LOC645915  | 0.9575 | 1.1576 | 1.0684 | 0.9171 | 1.0251 | 0.0545 |
| LOC650651  | 0.9423 | 1.1261 | 1.0553 | 0.9769 | 1.0251 | 0.0411 |
| LOC646863  | 1.0562 | 1.0935 | 1.0785 | 0.8724 | 1.0252 | 0.0515 |
| SLC1A6     | 0.9043 | 1.1684 | 1.0292 | 0.9988 | 1.0252 | 0.0547 |
| MOBKL2A    | 1.0419 | 1.1592 | 1.0171 | 0.8825 | 1.0252 | 0.0568 |
| LOC440461  | 0.9410 | 1.0436 | 1.1770 | 0.9391 | 1.0252 | 0.0562 |
| TRPM6      | 0.9787 | 1.1562 | 0.9829 | 0.9830 | 1.0252 | 0.0437 |
| VNN1       | 1.0258 | 1.1048 | 0.9897 | 0.9806 | 1.0252 | 0.0283 |
| ESPNL      | 0.9882 | 1.0583 | 1.0760 | 0.9782 | 1.0252 | 0.0246 |
| LOC727944  | 0.9669 | 1.1939 | 0.9121 | 1.0279 | 1.0252 | 0.0610 |
| VILL       | 1.0329 | 1.0250 | 1.0226 | 1.0205 | 1.0252 | 0.0027 |
| LOC729392  | 0.9954 | 1.0798 | 1.1356 | 0.8902 | 1.0252 | 0.0535 |
| LOC732445  | 0.9435 | 1.2000 | 1.0079 | 0.9496 | 1.0252 | 0.0600 |

|            |        |        |        |        |        |        |
|------------|--------|--------|--------|--------|--------|--------|
| EIF4G1     | 0.8803 | 1.4963 | 0.9127 | 0.8117 | 1.0252 | 0.1584 |
| KIAA1908   | 0.9610 | 1.2269 | 1.0039 | 0.9093 | 1.0253 | 0.0699 |
| LOC400723  | 0.8624 | 1.1986 | 1.0384 | 1.0017 | 1.0253 | 0.0691 |
| MYSM1      | 1.0089 | 0.9721 | 1.2330 | 0.8870 | 1.0253 | 0.0738 |
| NPHP3      | 0.9419 | 1.2002 | 1.0331 | 0.9259 | 1.0253 | 0.0629 |
| LOC441795  | 0.8871 | 1.1067 | 0.9846 | 1.1227 | 1.0253 | 0.0554 |
| XAGE1A     | 0.8776 | 1.5280 | 0.9295 | 0.7661 | 1.0253 | 0.1710 |
| GORASP2    | 0.8632 | 1.4609 | 1.0124 | 0.7648 | 1.0253 | 0.1539 |
| LOC1001334 | 0.9589 | 1.1282 | 1.0475 | 0.9667 | 1.0253 | 0.0397 |
| LOC1001336 | 0.9805 | 1.0889 | 1.0776 | 0.9544 | 1.0253 | 0.0339 |
| COL12A1    | 0.8943 | 1.1847 | 1.1352 | 0.8872 | 1.0254 | 0.0784 |
| LOC642424  | 1.0987 | 1.1040 | 0.9878 | 0.9111 | 1.0254 | 0.0466 |
| LOC613266  | 0.9909 | 1.1048 | 0.9669 | 1.0389 | 1.0254 | 0.0304 |
| OR10S1     | 0.9018 | 1.1616 | 1.0040 | 1.0341 | 1.0254 | 0.0535 |
| KRTAP5-9   | 0.9695 | 1.0786 | 1.0849 | 0.9685 | 1.0254 | 0.0326 |
| HECA       | 0.9086 | 1.2343 | 1.0932 | 0.8654 | 1.0254 | 0.0854 |
| LOC728602  | 0.9043 | 1.1872 | 1.1556 | 0.8544 | 1.0254 | 0.0852 |
| LOC390407  | 1.0268 | 1.1027 | 1.1281 | 0.8440 | 1.0254 | 0.0642 |
| LOC729643  | 0.9403 | 1.0589 | 1.1344 | 0.9680 | 1.0254 | 0.0443 |
| RAI2       | 0.8857 | 1.2199 | 1.1213 | 0.8746 | 1.0254 | 0.0863 |
| LOC645904  | 0.9419 | 1.1968 | 1.0273 | 0.9356 | 1.0254 | 0.0608 |
| ZNF154     | 1.0906 | 1.1216 | 1.0822 | 0.8073 | 1.0254 | 0.0732 |
| OPHN1      | 1.0134 | 1.1816 | 1.0755 | 0.8311 | 1.0254 | 0.0735 |
| LOC650990  | 0.9584 | 1.1862 | 1.0690 | 0.8881 | 1.0254 | 0.0652 |
| SCUBE1     | 1.0005 | 1.0537 | 1.1197 | 0.9278 | 1.0254 | 0.0406 |
| LOC644325  | 0.9114 | 1.1103 | 1.0957 | 0.9844 | 1.0255 | 0.0473 |
| PCDHGA12   | 1.0345 | 1.0578 | 1.0312 | 0.9783 | 1.0255 | 0.0168 |
| TRPC7      | 0.9206 | 1.1308 | 1.1552 | 0.8953 | 1.0255 | 0.0682 |
| SLC30A9    | 0.9361 | 1.2225 | 1.1243 | 0.8190 | 1.0255 | 0.0909 |
| MIR1305    | 1.0259 | 1.1006 | 0.9481 | 1.0273 | 1.0255 | 0.0311 |
| LOC650950  | 0.9584 | 1.2341 | 1.0614 | 0.8480 | 1.0255 | 0.0821 |
| NRSN1      | 1.0200 | 1.1017 | 0.9948 | 0.9855 | 1.0255 | 0.0264 |
| IRS1       | 0.9743 | 1.0691 | 1.0912 | 0.9675 | 1.0255 | 0.0319 |
| LOC643612  | 0.9988 | 1.1644 | 1.0137 | 0.9251 | 1.0255 | 0.0502 |
| LOC1001292 | 0.9809 | 1.1240 | 1.0423 | 0.9549 | 1.0255 | 0.0376 |
| LOC653166  | 0.9719 | 1.1056 | 1.0624 | 0.9622 | 1.0255 | 0.0349 |
| OR2F2      | 0.9820 | 1.1106 | 1.0485 | 0.9611 | 1.0255 | 0.0339 |
| C1S        | 1.0432 | 1.0241 | 1.1046 | 0.9304 | 1.0256 | 0.0361 |
| PDLIM5     | 0.7459 | 1.4602 | 1.0761 | 0.8201 | 1.0256 | 0.1612 |
| LOC646249  | 1.0010 | 1.1162 | 1.0511 | 0.9341 | 1.0256 | 0.0385 |
| PLA2G16    | 0.9944 | 1.0756 | 1.0855 | 0.9468 | 1.0256 | 0.0333 |
| LOC653397  | 0.9425 | 1.0950 | 1.1281 | 0.9368 | 1.0256 | 0.0501 |
| GRAMD2     | 0.9844 | 1.1596 | 1.0108 | 0.9476 | 1.0256 | 0.0465 |
| LOC1001338 | 0.9284 | 1.2398 | 0.9888 | 0.9456 | 1.0256 | 0.0725 |
| LOC730058  | 1.0175 | 1.1646 | 1.1089 | 0.8114 | 1.0256 | 0.0776 |
| LOC728255  | 1.0336 | 1.0611 | 0.9914 | 1.0164 | 1.0256 | 0.0147 |

|            |        |        |        |        |        |        |
|------------|--------|--------|--------|--------|--------|--------|
| LAMB2L     | 0.9853 | 1.1666 | 1.0353 | 0.9154 | 1.0256 | 0.0530 |
| LETM2      | 0.9937 | 1.0976 | 1.1026 | 0.9088 | 1.0257 | 0.0463 |
| TRAT1      | 0.9126 | 1.1791 | 1.0988 | 0.9123 | 1.0257 | 0.0674 |
| SERPINB10  | 0.8867 | 1.2432 | 1.0335 | 0.9393 | 1.0257 | 0.0786 |
| DNAJC21    | 0.9446 | 1.2075 | 1.0426 | 0.9082 | 1.0257 | 0.0669 |
| LOC1001289 | 0.8940 | 1.0698 | 1.0490 | 1.0900 | 1.0257 | 0.0447 |
| LOC643882  | 0.9280 | 1.2677 | 0.9860 | 0.9212 | 1.0257 | 0.0820 |
| DKFZp451A2 | 0.8863 | 1.0667 | 1.1217 | 1.0281 | 1.0257 | 0.0503 |
| TAS2R46    | 1.1056 | 1.0469 | 1.0538 | 0.8966 | 1.0257 | 0.0450 |
| HNF4A      | 0.9870 | 1.0845 | 1.0807 | 0.9509 | 1.0258 | 0.0336 |
| LOC1001348 | 1.0577 | 1.1880 | 1.0268 | 0.8306 | 1.0258 | 0.0738 |
| LOC441870  | 0.9767 | 1.2582 | 1.0514 | 0.8167 | 1.0258 | 0.0916 |
| LOC1001304 | 1.0464 | 1.0812 | 1.0162 | 0.9592 | 1.0258 | 0.0258 |
| LOC1001328 | 0.9397 | 1.2569 | 0.9732 | 0.9335 | 1.0258 | 0.0775 |
| LOC646626  | 0.9950 | 1.2405 | 1.0038 | 0.8640 | 1.0258 | 0.0784 |
| MTMR14     | 1.0719 | 1.2585 | 1.0111 | 0.7618 | 1.0258 | 0.1026 |
| LOC1001344 | 0.9501 | 1.1286 | 1.1158 | 0.9089 | 1.0258 | 0.0563 |
| MARCO      | 0.9931 | 1.1036 | 1.0177 | 0.9890 | 1.0258 | 0.0267 |
| PDZK3      | 1.1248 | 1.0183 | 1.0758 | 0.8846 | 1.0259 | 0.0519 |
| FASTKD5    | 0.9586 | 1.6650 | 0.7705 | 0.7093 | 1.0259 | 0.2196 |
| C2orf21    | 0.9724 | 1.0871 | 1.1641 | 0.8800 | 1.0259 | 0.0626 |
| KCNAB3     | 1.0174 | 1.0851 | 1.0405 | 0.9606 | 1.0259 | 0.0259 |
| LOC645238  | 0.9824 | 1.0592 | 1.1476 | 0.9144 | 1.0259 | 0.0502 |
| LOC651429  | 0.9858 | 1.0370 | 1.0116 | 1.0693 | 1.0259 | 0.0178 |
| LOC649201  | 1.0236 | 1.0525 | 1.1176 | 0.9101 | 1.0259 | 0.0433 |
| LOC497256  | 0.8994 | 1.1993 | 1.0783 | 0.9268 | 1.0259 | 0.0699 |
| MRVI1      | 1.0021 | 1.1119 | 1.0400 | 0.9498 | 1.0259 | 0.0341 |
| LOC1001284 | 0.9069 | 1.2295 | 1.0745 | 0.8929 | 1.0260 | 0.0794 |
| KIAA0195   | 1.0029 | 1.2734 | 1.0129 | 0.8146 | 1.0260 | 0.0943 |
| WSCD2      | 1.0530 | 1.2171 | 1.0192 | 0.8145 | 1.0260 | 0.0827 |
| MGRN1      | 0.9972 | 1.3678 | 0.9853 | 0.7536 | 1.0260 | 0.1270 |
| FLJ32255   | 0.9306 | 1.0798 | 1.1172 | 0.9764 | 1.0260 | 0.0436 |
| SOX10      | 0.9973 | 1.0137 | 1.1383 | 0.9547 | 1.0260 | 0.0395 |
| LOC728463  | 0.9756 | 1.1312 | 1.0052 | 0.9921 | 1.0260 | 0.0356 |
| C20orf117  | 1.0676 | 1.2430 | 0.9428 | 0.8508 | 1.0260 | 0.0849 |
| LOC653052  | 0.9306 | 1.2676 | 1.0102 | 0.8956 | 1.0260 | 0.0840 |
| LOC642536  | 0.9223 | 1.2919 | 1.0096 | 0.8803 | 1.0260 | 0.0926 |
| DSCR1L1    | 0.9396 | 1.1788 | 1.0106 | 0.9751 | 1.0260 | 0.0529 |
| LOC1001297 | 0.8861 | 1.2612 | 1.0209 | 0.9359 | 1.0260 | 0.0832 |
| CDYL2      | 1.0280 | 1.2278 | 0.9635 | 0.8850 | 1.0261 | 0.0733 |
| LOC440350  | 0.8846 | 1.0866 | 1.1018 | 1.0314 | 1.0261 | 0.0495 |
| RMND5B     | 0.9938 | 1.3352 | 1.0187 | 0.7567 | 1.0261 | 0.1187 |
| MIR7-1     | 0.9647 | 1.2861 | 0.9749 | 0.8787 | 1.0261 | 0.0893 |
| C9orf82    | 0.8461 | 1.3698 | 1.0531 | 0.8355 | 1.0261 | 0.1250 |
| LOC1001335 | 0.8892 | 1.1848 | 1.0910 | 0.9396 | 1.0262 | 0.0681 |
| NPPC       | 1.0439 | 1.1833 | 0.9753 | 0.9021 | 1.0262 | 0.0599 |

|            |        |        |        |        |        |        |
|------------|--------|--------|--------|--------|--------|--------|
| UXS1       | 1.0946 | 1.0727 | 0.9998 | 0.9377 | 1.0262 | 0.0358 |
| ADAM20     | 1.0049 | 1.0837 | 1.0803 | 0.9360 | 1.0262 | 0.0351 |
| CNGA1      | 0.9917 | 1.0881 | 0.9872 | 1.0381 | 1.0263 | 0.0236 |
| LOC1001327 | 0.9574 | 1.1908 | 1.1536 | 0.8035 | 1.0263 | 0.0902 |
| PPBP       | 0.8786 | 1.1385 | 1.1803 | 0.9079 | 1.0263 | 0.0775 |
| MED11      | 0.9014 | 1.3748 | 1.0119 | 0.8172 | 1.0263 | 0.1228 |
| MAPRE2     | 0.9176 | 1.3248 | 1.0862 | 0.7767 | 1.0263 | 0.1179 |
| LOC652051  | 0.9493 | 1.1461 | 1.1106 | 0.8993 | 1.0263 | 0.0602 |
| LOC646193  | 1.0156 | 1.0290 | 1.1218 | 0.9390 | 1.0263 | 0.0375 |
| LOC731365  | 0.9964 | 1.2705 | 1.0188 | 0.8198 | 1.0263 | 0.0927 |
| LOC642432  | 1.0043 | 0.9479 | 1.1790 | 0.9742 | 1.0264 | 0.0522 |
| LOC643186  | 1.0326 | 1.0370 | 1.1044 | 0.9314 | 1.0264 | 0.0357 |
| ITPR2      | 0.9902 | 1.3120 | 0.9377 | 0.8655 | 1.0264 | 0.0986 |
| LOC645635  | 0.9194 | 1.1258 | 1.1745 | 0.8857 | 1.0264 | 0.0725 |
| TFF3       | 1.0333 | 1.3352 | 0.9602 | 0.7768 | 1.0264 | 0.1162 |
| C10orf115  | 1.0236 | 1.0970 | 1.0130 | 0.9719 | 1.0264 | 0.0260 |
| LOC165186  | 0.9461 | 1.1487 | 1.1133 | 0.8975 | 1.0264 | 0.0616 |
| LOC652471  | 0.9751 | 1.1627 | 1.0525 | 0.9152 | 1.0264 | 0.0534 |
| LHX1       | 0.9251 | 1.1969 | 1.0243 | 0.9593 | 1.0264 | 0.0604 |
| C5orf40    | 1.0151 | 1.0694 | 1.0941 | 0.9270 | 1.0264 | 0.0370 |
| LOC1001338 | 0.9380 | 1.2113 | 1.0298 | 0.9267 | 1.0264 | 0.0658 |
| LOC1001301 | 0.9933 | 1.1774 | 1.0361 | 0.8990 | 1.0265 | 0.0579 |
| DAAM2      | 0.9770 | 1.1297 | 1.0695 | 0.9296 | 1.0265 | 0.0450 |
| SERPINA9   | 0.8868 | 1.1046 | 1.1300 | 0.9844 | 1.0265 | 0.0563 |
| PELI1      | 0.9936 | 1.3804 | 0.9580 | 0.7740 | 1.0265 | 0.1274 |
| LOC401284  | 1.0137 | 1.0748 | 1.0939 | 0.9235 | 1.0265 | 0.0383 |
| LOC1001308 | 0.9364 | 1.1266 | 1.0154 | 1.0275 | 1.0265 | 0.0390 |
| PDZD8      | 0.8667 | 1.3072 | 1.1344 | 0.7977 | 1.0265 | 0.1184 |
| CPPED1     | 0.9838 | 1.0685 | 1.0923 | 0.9615 | 1.0265 | 0.0318 |
| VAX2       | 0.9275 | 1.0266 | 1.2019 | 0.9502 | 1.0265 | 0.0622 |
| FOXN1      | 0.9502 | 1.0991 | 1.0589 | 0.9979 | 1.0265 | 0.0329 |
| OR2D2      | 1.0094 | 0.9719 | 1.1105 | 1.0144 | 1.0266 | 0.0296 |
| MIR607     | 1.0056 | 1.0568 | 1.0872 | 0.9566 | 1.0266 | 0.0287 |
| MIR200B    | 1.0186 | 1.2740 | 0.9608 | 0.8529 | 1.0266 | 0.0893 |
| SCGB1D4    | 1.0153 | 1.1145 | 1.0197 | 0.9570 | 1.0266 | 0.0326 |
| LOC651513  | 1.0369 | 1.0541 | 1.1180 | 0.8974 | 1.0266 | 0.0465 |
| LOC654201  | 1.0097 | 1.1681 | 1.0559 | 0.8727 | 1.0266 | 0.0611 |
| C3orf50    | 0.9611 | 1.0987 | 1.1281 | 0.9185 | 1.0266 | 0.0512 |
| LOC1001338 | 0.9698 | 1.1857 | 0.9662 | 0.9848 | 1.0266 | 0.0532 |
| FBXO10     | 1.0544 | 1.2137 | 0.9924 | 0.8460 | 1.0266 | 0.0761 |
| AEBP1      | 0.9600 | 1.1065 | 0.9648 | 1.0752 | 1.0266 | 0.0376 |
| CAPG       | 0.9494 | 1.1655 | 0.9985 | 0.9931 | 1.0266 | 0.0476 |
| LOC1001281 | 0.9552 | 1.0816 | 1.0654 | 1.0045 | 1.0267 | 0.0290 |
| CAMKK2     | 0.9297 | 1.2172 | 1.1112 | 0.8485 | 1.0267 | 0.0840 |
| EFCAB3     | 1.0728 | 0.9709 | 1.1182 | 0.9448 | 1.0267 | 0.0411 |
| LOC341315  | 0.7552 | 1.0966 | 1.5556 | 0.6993 | 1.0267 | 0.1970 |

|            |        |        |        |        |        |        |
|------------|--------|--------|--------|--------|--------|--------|
| HIST1H2AA  | 0.9714 | 1.0643 | 1.1677 | 0.9032 | 1.0267 | 0.0574 |
| PAF1       | 0.8911 | 1.4364 | 1.0254 | 0.7539 | 1.0267 | 0.1474 |
| LOC642564  | 0.9866 | 1.2414 | 1.0169 | 0.8619 | 1.0267 | 0.0790 |
| LOC1001347 | 0.9720 | 1.1040 | 1.0323 | 0.9985 | 1.0267 | 0.0286 |
| GRIK4      | 0.9975 | 1.1417 | 1.0304 | 0.9373 | 1.0267 | 0.0429 |
| UTP14C     | 0.8435 | 1.4741 | 0.9669 | 0.8224 | 1.0267 | 0.1525 |
| LOC647089  | 0.9685 | 1.1328 | 1.0843 | 0.9213 | 1.0267 | 0.0492 |
| CLUAP1     | 1.0549 | 1.1631 | 1.1156 | 0.7733 | 1.0267 | 0.0873 |
| ASCL4      | 0.9858 | 1.1362 | 1.0088 | 0.9762 | 1.0268 | 0.0371 |
| SULT1E1    | 0.9676 | 1.1749 | 1.0001 | 0.9644 | 1.0268 | 0.0500 |
| LOC653305  | 0.9240 | 1.1848 | 1.1147 | 0.8835 | 1.0268 | 0.0729 |
| TUBA3C     | 0.9435 | 1.1271 | 1.1705 | 0.8660 | 1.0268 | 0.0727 |
| CACNA2D1   | 1.0482 | 1.1403 | 1.0196 | 0.8988 | 1.0268 | 0.0498 |
| ZNF792     | 0.9123 | 1.2891 | 0.9916 | 0.9142 | 1.0268 | 0.0894 |
| LOC647229  | 0.9112 | 1.1840 | 1.1055 | 0.9064 | 1.0268 | 0.0700 |
| LOC651450  | 0.9517 | 1.1323 | 1.0368 | 0.9864 | 1.0268 | 0.0393 |
| LOC644208  | 1.0002 | 1.1230 | 0.9949 | 0.9891 | 1.0268 | 0.0321 |
| LOC729907  | 1.0074 | 1.0217 | 1.1155 | 0.9627 | 1.0268 | 0.0321 |
| RBM7       | 0.9790 | 1.1744 | 1.1290 | 0.8249 | 1.0268 | 0.0792 |
| KIAA1432   | 0.9099 | 1.1527 | 1.0973 | 0.9474 | 1.0268 | 0.0583 |
| LOC730413  | 0.9217 | 1.2189 | 1.1576 | 0.8091 | 1.0268 | 0.0968 |
| FOSB       | 0.9870 | 1.1756 | 1.0132 | 0.9316 | 1.0268 | 0.0524 |
| GLO1       | 0.8546 | 1.4640 | 1.0338 | 0.7551 | 1.0269 | 0.1567 |
| LOC728830  | 0.9430 | 1.1041 | 1.0653 | 0.9952 | 1.0269 | 0.0359 |
| FAM102B    | 0.9660 | 1.0298 | 1.2208 | 0.8910 | 1.0269 | 0.0706 |
| FBXW7      | 0.8811 | 1.2792 | 1.1096 | 0.8379 | 1.0269 | 0.1031 |
| LOC1001347 | 0.9306 | 1.2820 | 1.0315 | 0.8638 | 1.0270 | 0.0917 |
| LOC651916  | 0.9610 | 1.1403 | 0.8816 | 1.1251 | 1.0270 | 0.0632 |
| LOC400129  | 0.9726 | 1.1870 | 1.0573 | 0.8910 | 1.0270 | 0.0632 |
| PPP1R2P9   | 0.9446 | 1.2361 | 1.0225 | 0.9049 | 1.0270 | 0.0739 |
| NEFL       | 0.9940 | 1.4752 | 0.8923 | 0.7467 | 1.0270 | 0.1578 |
| OR52E5     | 1.0569 | 1.1380 | 1.0042 | 0.9090 | 1.0270 | 0.0480 |
| MIR1234    | 0.9320 | 1.0881 | 1.2224 | 0.8657 | 1.0270 | 0.0801 |
| NOXO1      | 0.9327 | 1.1400 | 1.0645 | 0.9711 | 1.0271 | 0.0467 |
| LOC645836  | 0.9201 | 1.2131 | 1.0600 | 0.9151 | 1.0271 | 0.0705 |
| LOC644923  | 0.9709 | 1.1279 | 1.1333 | 0.8762 | 1.0271 | 0.0628 |
| LOC340268  | 0.8535 | 1.1230 | 1.0971 | 1.0348 | 1.0271 | 0.0607 |
| OLFM4      | 0.9802 | 1.1583 | 1.0205 | 0.9494 | 1.0271 | 0.0461 |
| LOC1001320 | 0.9642 | 1.1272 | 1.0924 | 0.9248 | 1.0271 | 0.0489 |
| PTGER1     | 1.0008 | 1.1326 | 1.0266 | 0.9486 | 1.0272 | 0.0387 |
| LOC642778  | 1.0461 | 1.1297 | 1.0328 | 0.8999 | 1.0272 | 0.0475 |
| HMG20A     | 0.9177 | 1.2211 | 1.0786 | 0.8912 | 1.0272 | 0.0768 |
| COL17A1    | 1.0150 | 1.1459 | 1.0473 | 0.9005 | 1.0272 | 0.0506 |
| LOC646237  | 0.9104 | 1.0875 | 1.1015 | 1.0094 | 1.0272 | 0.0439 |
| LOC1001298 | 0.9519 | 1.0930 | 1.0453 | 1.0185 | 1.0272 | 0.0295 |
| LOC728782  | 0.7094 | 1.3839 | 1.1898 | 0.8256 | 1.0272 | 0.1569 |



|            |        |        |        |        |        |        |
|------------|--------|--------|--------|--------|--------|--------|
| LOC440160  | 0.9127 | 1.3925 | 1.0206 | 0.7829 | 1.0272 | 0.1311 |
| SLC9A8     | 1.0020 | 1.1988 | 1.0404 | 0.8676 | 1.0272 | 0.0682 |
| CYTH4      | 1.1296 | 1.0127 | 1.0273 | 0.9391 | 1.0272 | 0.0392 |
| LOC643990  | 1.0627 | 1.1295 | 0.9383 | 0.9784 | 1.0272 | 0.0428 |
| SEMA4D     | 0.8902 | 1.4474 | 0.9467 | 0.8246 | 1.0272 | 0.1423 |
| RHO        | 1.0094 | 1.1108 | 1.0735 | 0.9152 | 1.0272 | 0.0428 |
| LOC645157  | 0.9140 | 1.1086 | 1.4330 | 0.6534 | 1.0273 | 0.1643 |
| HTR1F      | 1.0422 | 1.1568 | 0.9936 | 0.9165 | 1.0273 | 0.0503 |
| HCRP1      | 1.0026 | 1.1895 | 0.9689 | 0.9481 | 1.0273 | 0.0552 |
| LOC344593  | 0.9453 | 1.2112 | 1.0792 | 0.8733 | 1.0273 | 0.0747 |
| LOC1001293 | 0.9249 | 1.0998 | 1.1161 | 0.9685 | 1.0273 | 0.0475 |
| TTY20      | 1.1174 | 1.1154 | 1.0406 | 0.8358 | 1.0273 | 0.0663 |
| MUC19      | 1.0505 | 1.0460 | 1.0285 | 0.9844 | 1.0273 | 0.0151 |
| ZHX1       | 1.0049 | 1.1910 | 1.0770 | 0.8364 | 1.0273 | 0.0743 |
| CLEC4M     | 0.9848 | 1.1617 | 1.0316 | 0.9314 | 1.0273 | 0.0492 |
| OR2A12     | 0.9927 | 1.0803 | 0.9911 | 1.0454 | 1.0274 | 0.0217 |
| KLK7       | 0.9403 | 1.1314 | 1.0799 | 0.9578 | 1.0274 | 0.0466 |
| TMEM216    | 1.1046 | 1.0892 | 0.9275 | 0.9883 | 1.0274 | 0.0421 |
| ISL2       | 0.9916 | 1.2725 | 0.9116 | 0.9339 | 1.0274 | 0.0834 |
| FLJ36144   | 0.9423 | 1.1034 | 1.1067 | 0.9572 | 1.0274 | 0.0449 |
| LOC1001322 | 0.9919 | 1.1130 | 1.0158 | 0.9889 | 1.0274 | 0.0292 |
| RPS3A      | 0.8906 | 1.2512 | 1.1761 | 0.7918 | 1.0274 | 0.1105 |
| LOC642762  | 0.9290 | 1.0767 | 1.1082 | 0.9958 | 1.0274 | 0.0404 |
| LOC643000  | 0.9591 | 1.1755 | 1.0817 | 0.8934 | 1.0274 | 0.0629 |
| LOC650733  | 0.9502 | 1.1318 | 1.0534 | 0.9743 | 1.0274 | 0.0412 |
| LOC643910  | 1.0783 | 1.0793 | 1.1287 | 0.8234 | 1.0274 | 0.0690 |
| MIR1292    | 0.9422 | 1.1770 | 1.1231 | 0.8674 | 1.0275 | 0.0733 |
| IL1F10     | 0.9531 | 1.1158 | 1.0852 | 0.9557 | 1.0275 | 0.0426 |
| MGC5139    | 0.9647 | 1.4327 | 0.7995 | 0.9129 | 1.0275 | 0.1394 |
| LOC646227  | 0.9447 | 1.0738 | 1.0572 | 1.0341 | 1.0275 | 0.0287 |
| LOC647974  | 1.0346 | 1.0106 | 1.0947 | 0.9700 | 1.0275 | 0.0261 |
| LOC728790  | 0.9278 | 1.0621 | 1.0884 | 1.0315 | 1.0275 | 0.0352 |
| LOC729903  | 1.0359 | 1.2112 | 1.0636 | 0.7993 | 1.0275 | 0.0853 |
| LOC648716  | 0.9593 | 1.1521 | 1.0729 | 0.9256 | 1.0275 | 0.0521 |
| LOC1001288 | 1.0112 | 1.1926 | 1.0236 | 0.8825 | 1.0275 | 0.0636 |
| ATP6V0D2   | 0.9861 | 1.1887 | 0.9981 | 0.9372 | 1.0275 | 0.0553 |
| BCL2L2     | 0.8608 | 1.4941 | 1.0228 | 0.7326 | 1.0276 | 0.1665 |
| LOC648085  | 0.9754 | 1.2475 | 1.0042 | 0.8832 | 1.0276 | 0.0777 |
| TSPYL5     | 0.9932 | 1.0652 | 1.0513 | 1.0006 | 1.0276 | 0.0180 |
| LOC401913  | 0.9531 | 1.1249 | 1.1235 | 0.9090 | 1.0276 | 0.0565 |
| MRPL42P5   | 0.8702 | 1.2010 | 1.1692 | 0.8703 | 1.0277 | 0.0911 |
| SLC30A10   | 0.9856 | 1.1489 | 1.0216 | 0.9545 | 1.0277 | 0.0427 |
| ProSAPiP1  | 1.0226 | 1.1297 | 1.0328 | 0.9256 | 1.0277 | 0.0417 |
| LOC645113  | 1.0495 | 1.2230 | 1.0079 | 0.8303 | 1.0277 | 0.0806 |
| LOC642340  | 0.8395 | 1.1827 | 1.0504 | 1.0381 | 1.0277 | 0.0707 |
| CYFIP2     | 0.9101 | 1.2980 | 1.0833 | 0.8194 | 1.0277 | 0.1054 |

|            |        |        |        |        |        |        |
|------------|--------|--------|--------|--------|--------|--------|
| TMEM111    | 0.8065 | 1.5160 | 1.0733 | 0.7151 | 1.0277 | 0.1796 |
| FLJ44955   | 0.9979 | 1.1744 | 1.0353 | 0.9033 | 1.0277 | 0.0562 |
| ATP6V0E2   | 0.7880 | 1.3685 | 1.1608 | 0.7936 | 1.0277 | 0.1432 |
| KIF22      | 1.3430 | 1.1666 | 0.9033 | 0.6981 | 1.0277 | 0.1423 |
| TTTY7B     | 0.9745 | 1.1016 | 1.1260 | 0.9089 | 1.0277 | 0.0517 |
| RBM        | 0.9528 | 1.1253 | 1.0965 | 0.9364 | 1.0277 | 0.0485 |
| SEZ6       | 1.0257 | 1.0742 | 1.1184 | 0.8926 | 1.0277 | 0.0489 |
| SEC13      | 0.9928 | 1.3529 | 1.0091 | 0.7562 | 1.0277 | 0.1228 |
| ALDH6A1    | 0.8369 | 1.5179 | 1.0395 | 0.7167 | 1.0278 | 0.1764 |
| ANP32D     | 1.0716 | 1.0667 | 1.0872 | 0.8858 | 1.0278 | 0.0475 |
| LOC652844  | 0.9912 | 1.2590 | 0.8839 | 0.9772 | 1.0278 | 0.0806 |
| MGC102966  | 0.9151 | 1.2308 | 1.0827 | 0.8828 | 1.0278 | 0.0806 |
| KANK3      | 0.9466 | 1.0544 | 1.0389 | 1.0716 | 1.0278 | 0.0279 |
| NCRNA00111 | 0.9722 | 1.1293 | 1.0737 | 0.9361 | 1.0278 | 0.0446 |
| QRFP       | 0.9257 | 1.0622 | 1.1808 | 0.9427 | 1.0279 | 0.0593 |
| NUP210L    | 0.9967 | 1.1371 | 1.0331 | 0.9445 | 1.0279 | 0.0407 |
| PPP5C      | 1.0434 | 1.1966 | 0.9823 | 0.8892 | 1.0279 | 0.0646 |
| LARGE      | 1.0013 | 1.2366 | 1.0099 | 0.8636 | 1.0279 | 0.0772 |
| KLRC4      | 0.9344 | 1.1226 | 1.0893 | 0.9652 | 1.0279 | 0.0460 |
| LOC1001342 | 1.0077 | 1.3675 | 0.7789 | 0.9575 | 1.0279 | 0.1234 |
| PCCA       | 0.8926 | 1.4735 | 1.0081 | 0.7374 | 1.0279 | 0.1586 |
| LOC1001327 | 0.9263 | 1.1359 | 1.0389 | 1.0105 | 1.0279 | 0.0432 |
| LOC647237  | 0.9554 | 1.0508 | 1.1526 | 0.9527 | 1.0279 | 0.0474 |
| SLC17A7    | 0.9576 | 1.1748 | 1.0788 | 0.9004 | 1.0279 | 0.0615 |
| LOC400987  | 1.0423 | 1.0678 | 1.0964 | 0.9054 | 1.0280 | 0.0423 |
| CHPF       | 1.1014 | 1.2388 | 1.0232 | 0.7485 | 1.0280 | 0.1033 |
| RNPEPL1    | 0.8823 | 1.2308 | 1.0729 | 0.9260 | 1.0280 | 0.0789 |
| RAPGEF6    | 0.9250 | 1.6927 | 0.8279 | 0.6664 | 1.0280 | 0.2279 |
| DRD1IP     | 1.0750 | 1.1413 | 0.9716 | 0.9242 | 1.0280 | 0.0492 |
| LOC1001295 | 1.0021 | 1.0834 | 1.0655 | 0.9611 | 1.0280 | 0.0283 |
| STX11      | 0.9729 | 1.0702 | 1.0778 | 0.9912 | 1.0280 | 0.0268 |
| DEFB118    | 0.9931 | 1.1010 | 1.0645 | 0.9537 | 1.0281 | 0.0334 |
| THBS4      | 1.0031 | 1.1112 | 1.0405 | 0.9574 | 1.0281 | 0.0325 |
| LOC647839  | 0.9483 | 1.0810 | 1.0961 | 0.9869 | 1.0281 | 0.0359 |
| C2orf80    | 0.9741 | 1.1743 | 1.0600 | 0.9040 | 1.0281 | 0.0582 |
| COX15      | 0.9210 | 1.2515 | 1.0810 | 0.8589 | 1.0281 | 0.0879 |
| RIMBP3     | 1.0799 | 1.0470 | 1.1247 | 0.8608 | 1.0281 | 0.0580 |
| CLIP4      | 1.0254 | 1.1459 | 0.9602 | 0.9810 | 1.0281 | 0.0415 |
| FZD1       | 0.9543 | 1.2602 | 1.0688 | 0.8292 | 1.0281 | 0.0915 |
| LOC644935  | 1.1172 | 1.1991 | 1.0690 | 0.7272 | 1.0281 | 0.1038 |
| GNB1       | 0.9914 | 1.3556 | 1.0108 | 0.7554 | 1.0283 | 0.1236 |
| CRIM2      | 0.9215 | 1.1411 | 1.0840 | 0.9666 | 1.0283 | 0.0509 |
| LOC728534  | 1.0553 | 1.1303 | 1.0204 | 0.9073 | 1.0283 | 0.0464 |
| SPATS2     | 0.8903 | 1.4732 | 0.9760 | 0.7737 | 1.0283 | 0.1540 |
| TMIGD1     | 1.0186 | 1.1223 | 1.0381 | 0.9343 | 1.0283 | 0.0386 |
| LOC147975  | 0.9921 | 1.0976 | 1.0896 | 0.9340 | 1.0283 | 0.0395 |

|            |        |        |        |        |        |        |
|------------|--------|--------|--------|--------|--------|--------|
| CD3G       | 0.9698 | 1.0699 | 1.1131 | 0.9604 | 1.0283 | 0.0376 |
| GABRA2     | 0.9128 | 1.1902 | 1.0723 | 0.9382 | 1.0284 | 0.0643 |
| LOC652589  | 0.9749 | 1.2350 | 0.8886 | 1.0149 | 1.0284 | 0.0738 |
| PARP6      | 1.0145 | 1.1834 | 0.9889 | 0.9266 | 1.0284 | 0.0549 |
| TAF5L      | 1.0091 | 1.2541 | 0.9950 | 0.8555 | 1.0284 | 0.0828 |
| FBXO45     | 0.9085 | 1.1954 | 1.1257 | 0.8841 | 1.0284 | 0.0778 |
| TAF1L      | 0.9197 | 1.3675 | 1.0280 | 0.7985 | 1.0284 | 0.1224 |
| LOC1001286 | 1.0309 | 1.1017 | 1.0337 | 0.9475 | 1.0285 | 0.0316 |
| LOC729660  | 0.9311 | 1.2897 | 0.9519 | 0.9412 | 1.0285 | 0.0872 |
| BAIAP2L2   | 0.9530 | 1.1822 | 1.0144 | 0.9643 | 1.0285 | 0.0530 |
| LOC1001311 | 1.1055 | 1.0560 | 1.0763 | 0.8762 | 1.0285 | 0.0518 |
| LOC642366  | 1.0411 | 1.0311 | 1.0816 | 0.9602 | 1.0285 | 0.0252 |
| ASRGL1     | 0.9285 | 1.1047 | 1.0925 | 0.9883 | 1.0285 | 0.0423 |
| RPL10      | 1.1083 | 1.0721 | 1.0603 | 0.8735 | 1.0285 | 0.0527 |
| LOC645179  | 0.8985 | 1.0873 | 1.0338 | 1.0944 | 1.0285 | 0.0454 |
| ERCC-00158 | 0.9834 | 1.0152 | 1.1447 | 0.9709 | 1.0286 | 0.0398 |
| LOC731884  | 1.0521 | 1.0048 | 1.1392 | 0.9182 | 1.0286 | 0.0461 |
| TM4SF18    | 0.9676 | 1.2228 | 1.0902 | 0.8339 | 1.0286 | 0.0832 |
| CPNE5      | 1.0791 | 1.0087 | 0.9900 | 1.0367 | 1.0286 | 0.0194 |
| LOC648878  | 0.9975 | 1.0848 | 1.0685 | 0.9637 | 1.0286 | 0.0288 |
| LOC645660  | 0.9655 | 1.0191 | 1.1058 | 1.0240 | 1.0286 | 0.0290 |
| LOC642787  | 1.0025 | 1.2386 | 0.9662 | 0.9073 | 1.0287 | 0.0727 |
| PIB5PA     | 0.9925 | 1.2180 | 1.0205 | 0.8837 | 1.0287 | 0.0697 |
| LOC653261  | 0.9742 | 1.1804 | 1.0917 | 0.8683 | 1.0287 | 0.0681 |
| GLT25D2    | 1.0561 | 1.0991 | 1.0433 | 0.9162 | 1.0287 | 0.0393 |
| MIR193B    | 0.9213 | 1.1849 | 1.0592 | 0.9493 | 1.0287 | 0.0600 |
| GRLF1      | 0.9450 | 1.1627 | 1.0963 | 0.9107 | 1.0287 | 0.0602 |
| RHBDL2     | 0.7698 | 1.2933 | 1.1335 | 0.9181 | 1.0287 | 0.1156 |
| TNFSF8     | 1.0871 | 1.1680 | 0.9430 | 0.9167 | 1.0287 | 0.0597 |
| REM1       | 0.9196 | 1.0715 | 1.0972 | 1.0266 | 1.0287 | 0.0392 |
| LOC642720  | 0.9356 | 1.1041 | 1.1045 | 0.9706 | 1.0287 | 0.0442 |
| RNF111     | 0.9482 | 1.2433 | 1.1080 | 0.8154 | 1.0287 | 0.0932 |
| ZNRF1      | 0.8799 | 1.1861 | 1.0964 | 0.9526 | 1.0288 | 0.0691 |
| SPRR3      | 0.9539 | 1.1694 | 1.0733 | 0.9185 | 1.0288 | 0.0574 |
| TUBA3D     | 0.9979 | 1.4798 | 0.9375 | 0.6998 | 1.0288 | 0.1635 |
| ZER1       | 1.2162 | 1.2661 | 0.7852 | 0.8476 | 1.0288 | 0.1237 |
| ZKSCAN2    | 1.0723 | 1.2226 | 0.9376 | 0.8826 | 1.0288 | 0.0759 |
| C1orf173   | 1.0428 | 1.0521 | 0.9775 | 1.0427 | 1.0288 | 0.0172 |
| LOC389435  | 1.0246 | 1.1839 | 1.1351 | 0.7716 | 1.0288 | 0.0920 |
| LOC390638  | 0.9687 | 1.1023 | 1.0422 | 1.0022 | 1.0288 | 0.0287 |
| LOC1001303 | 1.0272 | 1.1122 | 0.9810 | 0.9950 | 1.0288 | 0.0294 |
| LOC647335  | 1.0935 | 1.0920 | 0.9680 | 0.9618 | 1.0288 | 0.0369 |
| TAS2R16    | 0.8806 | 1.1539 | 1.0852 | 0.9957 | 1.0289 | 0.0591 |
| MEAF6      | 0.8091 | 1.4284 | 1.1156 | 0.7624 | 1.0289 | 0.1545 |
| ERCC-00048 | 0.9550 | 1.0942 | 0.9952 | 1.0711 | 1.0289 | 0.0325 |
| ZCWPW2     | 1.1133 | 1.0980 | 0.9771 | 0.9271 | 1.0289 | 0.0456 |

|            |        |        |        |        |        |        |
|------------|--------|--------|--------|--------|--------|--------|
| LOC390033  | 0.9910 | 1.1821 | 0.9977 | 0.9447 | 1.0289 | 0.0524 |
| MLXIP      | 0.9744 | 1.1152 | 1.0489 | 0.9770 | 1.0289 | 0.0336 |
| LCN9       | 1.0187 | 1.1249 | 1.0529 | 0.9192 | 1.0289 | 0.0427 |
| LOC647344  | 0.9604 | 1.1817 | 0.9463 | 1.0273 | 1.0289 | 0.0539 |
| LOC644537  | 0.9498 | 1.0938 | 1.0672 | 1.0048 | 1.0289 | 0.0323 |
| LOC147646  | 0.9898 | 1.1824 | 1.0432 | 0.9002 | 1.0289 | 0.0591 |
| BATF       | 1.0409 | 1.1321 | 1.0875 | 0.8553 | 1.0289 | 0.0608 |
| ST6GAL2    | 0.9731 | 1.0796 | 1.0949 | 0.9681 | 1.0289 | 0.0338 |
| SULT2A1    | 0.9648 | 1.1475 | 1.1178 | 0.8856 | 1.0290 | 0.0623 |
| LOC731396  | 0.9699 | 1.2947 | 1.0284 | 0.8229 | 1.0290 | 0.0986 |
| KBTBD5     | 1.0443 | 1.0298 | 1.0837 | 0.9581 | 1.0290 | 0.0262 |
| NAP1L5     | 1.0235 | 1.1450 | 1.1371 | 0.8103 | 1.0290 | 0.0780 |
| ZNF175     | 1.0436 | 1.2434 | 1.0605 | 0.7685 | 1.0290 | 0.0979 |
| LOC653499  | 0.9747 | 1.0535 | 1.0182 | 1.0698 | 1.0290 | 0.0211 |
| CCBP2      | 0.9972 | 1.0362 | 1.1336 | 0.9492 | 1.0290 | 0.0391 |
| LOC440871  | 1.0289 | 0.9888 | 1.0980 | 1.0003 | 1.0290 | 0.0245 |
| WDR66      | 1.0128 | 1.1793 | 1.0166 | 0.9074 | 1.0290 | 0.0561 |
| SLC35A3    | 0.8803 | 1.3952 | 1.1073 | 0.7335 | 1.0291 | 0.1442 |
| PRSS37     | 1.0704 | 1.1266 | 0.9984 | 0.9209 | 1.0291 | 0.0446 |
| FAM114A2   | 1.0969 | 1.0880 | 1.0832 | 0.8483 | 1.0291 | 0.0603 |
| RGP1       | 0.9991 | 1.1008 | 1.0832 | 0.9333 | 1.0291 | 0.0389 |
| YIPF6      | 0.8164 | 1.4178 | 1.1146 | 0.7677 | 1.0291 | 0.1505 |
| ATP5S      | 0.8211 | 1.4219 | 1.1312 | 0.7423 | 1.0291 | 0.1555 |
| BTN2A2     | 1.0325 | 1.0903 | 1.0525 | 0.9414 | 1.0292 | 0.0316 |
| SNRNP200   | 1.0185 | 1.2233 | 0.9925 | 0.8825 | 1.0292 | 0.0711 |
| LOC728207  | 0.9898 | 1.1351 | 1.1215 | 0.8705 | 1.0292 | 0.0622 |
| FBXL3      | 1.0474 | 1.0980 | 1.0920 | 0.8797 | 1.0293 | 0.0511 |
| LOC1001345 | 1.1223 | 1.2270 | 0.8924 | 0.8753 | 1.0293 | 0.0867 |
| FLJ10120   | 0.9560 | 1.1684 | 0.9854 | 1.0074 | 1.0293 | 0.0475 |
| LOC1001289 | 1.0220 | 1.1439 | 1.0493 | 0.9020 | 1.0293 | 0.0498 |
| LOC645724  | 0.9572 | 1.0596 | 1.1198 | 0.9806 | 1.0293 | 0.0373 |
| CTSH       | 0.9350 | 1.4479 | 1.0667 | 0.6677 | 1.0293 | 0.1623 |
| LOC389142  | 1.1126 | 1.1046 | 1.0447 | 0.8554 | 1.0293 | 0.0599 |
| RPS16      | 1.0359 | 1.0220 | 1.1050 | 0.9544 | 1.0293 | 0.0309 |
| N4BP2L2    | 1.0401 | 1.1828 | 1.0083 | 0.8860 | 1.0293 | 0.0610 |
| TNIP3      | 1.0269 | 1.1484 | 1.0523 | 0.8897 | 1.0293 | 0.0534 |
| LOC387826  | 1.1101 | 1.0284 | 1.0120 | 0.9668 | 1.0293 | 0.0299 |
| OR4D5      | 1.0057 | 0.9845 | 1.1640 | 0.9630 | 1.0293 | 0.0457 |
| ZNF230     | 0.9977 | 1.0643 | 1.0276 | 1.0276 | 1.0293 | 0.0136 |
| TSNAXIP1   | 0.9199 | 1.2320 | 1.0646 | 0.9008 | 1.0293 | 0.0768 |
| MATN2      | 0.9415 | 1.1910 | 1.0579 | 0.9270 | 1.0293 | 0.0613 |
| LOC644031  | 0.9379 | 1.1658 | 0.9716 | 1.0421 | 1.0293 | 0.0504 |
| KLHL38     | 0.8776 | 1.2560 | 1.0314 | 0.9524 | 1.0294 | 0.0818 |
| LOC653270  | 1.0080 | 1.1952 | 1.0279 | 0.8864 | 1.0294 | 0.0635 |
| NGFRAP1    | 0.9711 | 1.4737 | 0.9807 | 0.6921 | 1.0294 | 0.1625 |
| LOC1001313 | 0.9383 | 1.1703 | 1.1278 | 0.8812 | 1.0294 | 0.0706 |

|            |        |        |        |        |        |        |
|------------|--------|--------|--------|--------|--------|--------|
| FLJ21511   | 0.9509 | 1.1460 | 1.0512 | 0.9695 | 1.0294 | 0.0446 |
| HHAT       | 1.0872 | 1.0666 | 1.1020 | 0.8619 | 1.0294 | 0.0563 |
| CHD3       | 0.9482 | 1.2321 | 1.0434 | 0.8938 | 1.0294 | 0.0743 |
| C13orf39   | 0.9879 | 1.1595 | 1.0341 | 0.9361 | 1.0294 | 0.0478 |
| LOC1001909 | 0.8525 | 1.2423 | 1.3355 | 0.6875 | 1.0294 | 0.1547 |
| FLJ37786   | 1.0091 | 1.1320 | 1.0591 | 0.9176 | 1.0294 | 0.0450 |
| C9orf57    | 0.9544 | 1.2338 | 1.0661 | 0.8636 | 1.0294 | 0.0797 |
| LOC150568  | 1.0023 | 1.0486 | 1.0765 | 0.9903 | 1.0295 | 0.0201 |
| PI3        | 0.9261 | 1.1157 | 1.1009 | 0.9753 | 1.0295 | 0.0467 |
| LOC441440  | 1.0373 | 1.1381 | 1.0726 | 0.8700 | 1.0295 | 0.0571 |
| IYD        | 0.8904 | 1.2804 | 1.1109 | 0.8363 | 1.0295 | 0.1026 |
| ANP32A     | 0.9577 | 1.1070 | 1.0432 | 1.0104 | 1.0296 | 0.0313 |
| SERPINB4   | 0.9773 | 1.0840 | 1.1279 | 0.9291 | 1.0296 | 0.0461 |
| HSPA1L     | 1.0920 | 1.1595 | 0.9945 | 0.8724 | 1.0296 | 0.0624 |
| TREML1     | 0.9393 | 1.0130 | 1.1634 | 1.0028 | 1.0296 | 0.0475 |
| MTMR11     | 0.9712 | 1.1515 | 1.0343 | 0.9616 | 1.0296 | 0.0437 |
| LOC1001287 | 0.9173 | 1.2251 | 1.1078 | 0.8684 | 1.0296 | 0.0831 |
| RPL31P11   | 0.9424 | 1.1684 | 1.0851 | 0.9229 | 1.0297 | 0.0587 |
| DNAJC14    | 1.0336 | 1.1679 | 1.0801 | 0.8373 | 1.0297 | 0.0699 |
| LOC728608  | 1.0100 | 1.0614 | 1.0656 | 0.9819 | 1.0297 | 0.0203 |
| LOC728944  | 0.9566 | 1.4433 | 0.9995 | 0.7195 | 1.0297 | 0.1510 |
| URG4       | 0.9599 | 1.4107 | 1.0297 | 0.7187 | 1.0297 | 0.1434 |
| PHLDA3     | 0.8338 | 1.3021 | 1.1863 | 0.7968 | 1.0297 | 0.1263 |
| LRRN2      | 0.9304 | 1.1885 | 1.0509 | 0.9492 | 1.0297 | 0.0592 |
| C12orf63   | 1.0202 | 1.1584 | 0.9767 | 0.9637 | 1.0298 | 0.0445 |
| PNRC1      | 0.9860 | 1.1428 | 1.1548 | 0.8354 | 1.0298 | 0.0753 |
| LOC1001297 | 1.0071 | 1.1238 | 1.0887 | 0.8995 | 1.0298 | 0.0498 |
| LGALS14    | 1.0416 | 1.0804 | 1.0189 | 0.9784 | 1.0298 | 0.0213 |
| C9orf90    | 0.8430 | 1.4351 | 1.1998 | 0.6413 | 1.0298 | 0.1777 |
| SON        | 0.9022 | 1.4130 | 1.0512 | 0.7528 | 1.0298 | 0.1415 |
| MIR200C    | 0.9620 | 1.0471 | 1.1055 | 1.0046 | 1.0298 | 0.0306 |
| LOC729957  | 1.0389 | 1.1099 | 1.1387 | 0.8318 | 1.0298 | 0.0693 |
| LOC647107  | 0.8986 | 1.0819 | 1.1004 | 1.0384 | 1.0298 | 0.0456 |
| CLASP1     | 0.9373 | 1.3638 | 1.0126 | 0.8056 | 1.0298 | 0.1193 |
| LOC646740  | 0.9878 | 1.1065 | 1.0897 | 0.9354 | 1.0298 | 0.0410 |
| BEND5      | 1.0171 | 1.0869 | 1.0302 | 0.9852 | 1.0299 | 0.0212 |
| ANKRD18B   | 0.9739 | 1.1564 | 1.0345 | 0.9546 | 1.0299 | 0.0455 |
| LIPL2      | 0.9354 | 1.0818 | 1.0441 | 1.0582 | 1.0299 | 0.0324 |
| LOC642343  | 1.0451 | 1.1185 | 1.0170 | 0.9388 | 1.0299 | 0.0371 |
| LOC649909  | 1.0132 | 1.0832 | 1.1591 | 0.8640 | 1.0299 | 0.0628 |
| DBH        | 1.0464 | 1.0287 | 1.0380 | 1.0064 | 1.0299 | 0.0086 |
| C16orf46   | 0.9016 | 1.2578 | 1.1638 | 0.7964 | 1.0299 | 0.1083 |
| WDR72      | 1.1021 | 1.2361 | 1.0456 | 0.7359 | 1.0299 | 0.1058 |
| OR6C4      | 1.1484 | 1.0702 | 0.9737 | 0.9275 | 1.0299 | 0.0494 |
| NBPF20     | 0.6601 | 1.7669 | 0.8972 | 0.7957 | 1.0300 | 0.2504 |
| LOC642757  | 1.0833 | 1.0637 | 1.0279 | 0.9452 | 1.0300 | 0.0305 |

|            |        |        |        |        |        |        |
|------------|--------|--------|--------|--------|--------|--------|
| GRM6       | 1.0942 | 1.0577 | 0.9906 | 0.9775 | 1.0300 | 0.0277 |
| FAM123C    | 0.9945 | 1.0968 | 1.0776 | 0.9512 | 1.0300 | 0.0344 |
| LOC283314  | 0.9547 | 1.1297 | 1.1098 | 0.9258 | 1.0300 | 0.0523 |
| LOC728323  | 1.0001 | 1.1517 | 1.1077 | 0.8606 | 1.0300 | 0.0648 |
| RIPK3      | 0.9490 | 1.1797 | 0.9420 | 1.0495 | 1.0300 | 0.0556 |
| FLJ30430   | 0.8966 | 1.2934 | 0.9673 | 0.9630 | 1.0301 | 0.0893 |
| LOC389365  | 1.0413 | 1.0344 | 1.1051 | 0.9396 | 1.0301 | 0.0341 |
| LOC1001297 | 0.9992 | 1.0710 | 1.0391 | 1.0111 | 1.0301 | 0.0160 |
| LOC346329  | 0.8368 | 1.1124 | 1.1822 | 0.9890 | 1.0301 | 0.0758 |
| MIR1294    | 1.0048 | 1.0285 | 1.0488 | 1.0383 | 1.0301 | 0.0094 |
| RPLP1      | 0.9894 | 1.2003 | 1.0717 | 0.8592 | 1.0301 | 0.0716 |
| C11orf49   | 1.0423 | 1.2846 | 0.9508 | 0.8428 | 1.0301 | 0.0941 |
| CDK3       | 0.9618 | 1.2062 | 1.0377 | 0.9150 | 1.0302 | 0.0639 |
| ERCC-00144 | 0.9683 | 1.2735 | 0.9180 | 0.9609 | 1.0302 | 0.0818 |
| LOC641825  | 0.9412 | 1.1060 | 1.1519 | 0.9216 | 1.0302 | 0.0579 |
| LDOC1      | 0.8606 | 1.3024 | 1.1109 | 0.8469 | 1.0302 | 0.1091 |
| LOC652217  | 1.0314 | 1.1253 | 1.0680 | 0.8961 | 1.0302 | 0.0487 |
| IGFBP5     | 1.0302 | 1.2465 | 1.0052 | 0.8389 | 1.0302 | 0.0837 |
| OR51A2     | 0.9909 | 1.1348 | 1.1077 | 0.8875 | 1.0302 | 0.0569 |
| PLA2G4D    | 0.9923 | 1.0668 | 1.0690 | 0.9928 | 1.0302 | 0.0218 |
| JRK        | 0.9917 | 1.2073 | 0.9699 | 0.9521 | 1.0302 | 0.0596 |
| LOC1001338 | 1.0029 | 1.2552 | 0.9772 | 0.8856 | 1.0302 | 0.0791 |
| RGS17      | 0.8961 | 1.3104 | 1.0362 | 0.8782 | 1.0302 | 0.0998 |
| LOC644787  | 0.9655 | 1.1532 | 1.1081 | 0.8941 | 1.0303 | 0.0605 |
| FANCM      | 1.0055 | 1.0534 | 1.1465 | 0.9156 | 1.0303 | 0.0481 |
| LOC645876  | 0.9716 | 0.9942 | 1.0527 | 1.1026 | 1.0303 | 0.0296 |
| LOC653192  | 0.9322 | 1.1120 | 1.1035 | 0.9734 | 1.0303 | 0.0455 |
| C7orf61    | 0.9335 | 1.1574 | 1.0639 | 0.9664 | 1.0303 | 0.0506 |
| FBS1       | 1.0029 | 1.2070 | 1.0978 | 0.8137 | 1.0303 | 0.0834 |
| ADAM5P     | 1.0296 | 1.0613 | 1.0645 | 0.9659 | 1.0304 | 0.0229 |
| LOC1001335 | 0.9918 | 1.1073 | 1.0483 | 0.9741 | 1.0304 | 0.0301 |
| LOC653692  | 0.8718 | 1.1963 | 1.0784 | 0.9750 | 1.0304 | 0.0695 |
| RAET1L     | 1.0620 | 1.1411 | 1.0294 | 0.8889 | 1.0304 | 0.0527 |
| SPATA20    | 0.8672 | 1.4188 | 1.1134 | 0.7222 | 1.0304 | 0.1526 |
| LOC652552  | 1.0585 | 1.0228 | 1.0792 | 0.9611 | 1.0304 | 0.0259 |
| LOC728509  | 1.0319 | 1.0658 | 1.0652 | 0.9586 | 1.0304 | 0.0252 |
| ZNF329     | 1.0563 | 1.3009 | 0.9997 | 0.7648 | 1.0304 | 0.1101 |
| LOC1001335 | 0.9846 | 1.1363 | 1.0586 | 0.9421 | 1.0304 | 0.0427 |
| LOC497190  | 0.9915 | 1.1061 | 1.0599 | 0.9642 | 1.0304 | 0.0323 |
| SLC2A5     | 1.0476 | 1.1377 | 1.0069 | 0.9296 | 1.0304 | 0.0433 |
| HTR1D      | 0.9173 | 1.2546 | 1.0102 | 0.9398 | 1.0305 | 0.0773 |
| ANKIB1     | 0.9319 | 1.4687 | 0.9533 | 0.7681 | 1.0305 | 0.1518 |
| CD19       | 0.9621 | 1.1012 | 1.1458 | 0.9129 | 1.0305 | 0.0554 |
| MGC45922   | 0.9879 | 1.0481 | 1.1331 | 0.9529 | 1.0305 | 0.0395 |
| C1orf203   | 0.9943 | 1.3767 | 1.0698 | 0.6812 | 1.0305 | 0.1428 |
| IRS4       | 1.0375 | 1.2078 | 0.9960 | 0.8809 | 1.0305 | 0.0677 |

|            |        |        |        |        |        |        |
|------------|--------|--------|--------|--------|--------|--------|
| UGT3A1     | 0.9606 | 1.0814 | 1.1005 | 0.9797 | 1.0305 | 0.0353 |
| LOC652508  | 0.9897 | 1.0808 | 1.0872 | 0.9644 | 1.0305 | 0.0313 |
| EVI2A      | 1.0507 | 1.0523 | 1.0937 | 0.9255 | 1.0305 | 0.0364 |
| LOC648211  | 0.9631 | 1.0747 | 1.2115 | 0.8729 | 1.0306 | 0.0731 |
| GLG1       | 0.9163 | 1.3954 | 1.0209 | 0.7896 | 1.0306 | 0.1305 |
| LOC1001924 | 0.9515 | 1.1177 | 1.1056 | 0.9475 | 1.0306 | 0.0469 |
| CXorf41    | 1.0062 | 1.1261 | 1.0632 | 0.9268 | 1.0306 | 0.0424 |
| KRT40      | 1.0042 | 1.0615 | 1.0999 | 0.9569 | 1.0306 | 0.0315 |
| CLIC3      | 0.9037 | 1.1178 | 1.1005 | 1.0005 | 1.0306 | 0.0496 |
| LOC646743  | 1.0249 | 1.0237 | 0.9383 | 1.1356 | 1.0306 | 0.0404 |
| CCR1       | 1.0284 | 1.1214 | 0.9660 | 1.0068 | 1.0306 | 0.0329 |
| LOC646547  | 0.9871 | 1.2192 | 1.0390 | 0.8775 | 1.0307 | 0.0713 |
| SNORD113-1 | 1.0288 | 1.1499 | 0.9839 | 0.9601 | 1.0307 | 0.0422 |
| CTNNB1     | 0.9785 | 1.4249 | 0.9863 | 0.7331 | 1.0307 | 0.1439 |
| LOC1001299 | 0.9053 | 1.1094 | 1.0812 | 1.0269 | 1.0307 | 0.0452 |
| ZMIZ2      | 1.0261 | 1.1404 | 1.1453 | 0.8110 | 1.0307 | 0.0782 |
| LOC1001347 | 0.8274 | 1.2521 | 1.1341 | 0.9094 | 1.0307 | 0.0982 |
| LOC728779  | 1.1395 | 1.2450 | 0.8643 | 0.8741 | 1.0308 | 0.0957 |
| CGNL1      | 1.0607 | 1.3705 | 0.9677 | 0.7242 | 1.0308 | 0.1336 |
| LOC646114  | 0.9142 | 1.0779 | 1.1313 | 0.9998 | 1.0308 | 0.0473 |
| KIF3B      | 1.0528 | 1.4311 | 0.9804 | 0.6589 | 1.0308 | 0.1585 |
| GALNT4     | 1.0420 | 1.2343 | 0.9169 | 0.9301 | 1.0308 | 0.0734 |
| DMP1       | 0.9935 | 1.1028 | 1.1551 | 0.8718 | 1.0308 | 0.0628 |
| LOC646162  | 0.9631 | 1.1303 | 1.0931 | 0.9370 | 1.0309 | 0.0476 |
| HMHB1      | 1.0432 | 1.0107 | 1.1225 | 0.9472 | 1.0309 | 0.0365 |
| LOC643150  | 1.0032 | 1.1474 | 1.0331 | 0.9399 | 1.0309 | 0.0434 |
| PHF20      | 1.0239 | 1.4613 | 0.9585 | 0.6799 | 1.0309 | 0.1617 |
| LOC643791  | 0.8906 | 1.1740 | 1.1009 | 0.9582 | 1.0309 | 0.0648 |
| LOC1001346 | 0.9250 | 1.1470 | 1.0928 | 0.9590 | 1.0309 | 0.0530 |
| LOC644647  | 0.9508 | 1.1729 | 0.9725 | 1.0276 | 1.0310 | 0.0500 |
| WDR26      | 0.9073 | 1.4637 | 1.1221 | 0.6308 | 1.0310 | 0.1758 |
| DSCR10     | 0.9871 | 1.0334 | 1.1119 | 0.9916 | 1.0310 | 0.0289 |
| LOC729459  | 1.0896 | 1.2374 | 1.0118 | 0.7852 | 1.0310 | 0.0944 |
| FOSL1      | 0.9535 | 1.1131 | 1.1196 | 0.9378 | 1.0310 | 0.0494 |
| LOC729789  | 1.0371 | 1.1309 | 1.0254 | 0.9310 | 1.0311 | 0.0409 |
| RGAG4      | 0.9869 | 1.1607 | 1.0318 | 0.9449 | 1.0311 | 0.0467 |
| KCNV2      | 0.9650 | 1.1553 | 1.1170 | 0.8871 | 1.0311 | 0.0632 |
| LOC1001338 | 1.0089 | 1.0904 | 1.0283 | 0.9969 | 1.0311 | 0.0208 |
| C3orf67    | 1.0274 | 1.1788 | 0.9448 | 0.9735 | 1.0311 | 0.0521 |
| HRASLS2    | 1.0890 | 1.0143 | 1.0353 | 0.9860 | 1.0311 | 0.0218 |
| LOC1001295 | 0.9227 | 1.2360 | 1.0236 | 0.9422 | 1.0311 | 0.0717 |
| LOC390940  | 0.9724 | 1.3813 | 0.9045 | 0.8664 | 1.0311 | 0.1188 |
| LOC642456  | 0.9521 | 1.1676 | 1.0082 | 0.9967 | 1.0311 | 0.0471 |
| C9orf27    | 0.9602 | 1.2355 | 1.0079 | 0.9210 | 1.0312 | 0.0704 |
| ASTN2      | 0.8724 | 1.2748 | 1.0560 | 0.9214 | 1.0312 | 0.0900 |
| WNT6       | 0.9087 | 1.2610 | 1.0317 | 0.9233 | 1.0312 | 0.0814 |

|            |        |        |        |        |        |        |
|------------|--------|--------|--------|--------|--------|--------|
| LOC729675  | 1.0189 | 1.0976 | 1.0483 | 0.9599 | 1.0312 | 0.0288 |
| C14orf147  | 0.7370 | 1.6069 | 1.0278 | 0.7530 | 1.0312 | 0.2032 |
| MOBKLC2    | 0.9824 | 1.2782 | 1.0056 | 0.8585 | 1.0312 | 0.0884 |
| LOC642018  | 1.0071 | 1.2023 | 1.1058 | 0.8095 | 1.0312 | 0.0839 |
| IL22RA1    | 1.0718 | 1.1339 | 1.0684 | 0.8507 | 1.0312 | 0.0620 |
| LOC727929  | 0.9343 | 1.1839 | 1.1128 | 0.8937 | 1.0312 | 0.0697 |
| FERMT3     | 1.0697 | 1.1342 | 1.0778 | 0.8431 | 1.0312 | 0.0643 |
| SLC27A4    | 0.9888 | 1.0420 | 1.0201 | 1.0739 | 1.0312 | 0.0179 |
| LOC650795  | 0.9792 | 1.0835 | 1.0971 | 0.9650 | 1.0312 | 0.0343 |
| LOC644539  | 1.0016 | 1.1086 | 1.1120 | 0.9026 | 1.0312 | 0.0499 |
| LOC388925  | 0.9045 | 1.2818 | 1.1792 | 0.7595 | 1.0312 | 0.1206 |
| C12orf62   | 0.9295 | 1.3457 | 1.1495 | 0.7004 | 1.0313 | 0.1393 |
| CXCL14     | 1.0203 | 1.0189 | 1.0133 | 1.0727 | 1.0313 | 0.0139 |
| ERCC-00017 | 1.0346 | 1.0825 | 1.0717 | 0.9365 | 1.0313 | 0.0332 |
| STK25      | 1.0085 | 1.4225 | 0.9529 | 0.7415 | 1.0313 | 0.1425 |
| RPL39      | 0.9293 | 1.1549 | 1.0916 | 0.9496 | 1.0313 | 0.0548 |
| C20orf114  | 1.0698 | 1.0845 | 1.0664 | 0.9048 | 1.0314 | 0.0424 |
| KAAG1      | 1.0488 | 1.1498 | 1.0249 | 0.9020 | 1.0314 | 0.0509 |
| SFRP2      | 1.0349 | 1.1012 | 1.1471 | 0.8424 | 1.0314 | 0.0671 |
| NAT15      | 0.9666 | 1.3634 | 0.9927 | 0.8029 | 1.0314 | 0.1184 |
| CRYGN      | 1.0293 | 1.0658 | 0.9910 | 1.0394 | 1.0314 | 0.0155 |
| LOC647509  | 1.0860 | 1.1362 | 1.0069 | 0.8966 | 1.0314 | 0.0522 |
| LOC648080  | 0.9625 | 1.2323 | 1.1066 | 0.8245 | 1.0315 | 0.0883 |
| LOC646774  | 0.9189 | 1.1090 | 1.0872 | 1.0109 | 1.0315 | 0.0430 |
| CCDC90B    | 0.9795 | 1.2849 | 1.2119 | 0.6498 | 1.0315 | 0.1429 |
| MT1M       | 0.9847 | 1.0876 | 1.0723 | 0.9814 | 1.0315 | 0.0282 |
| LOC650455  | 0.9747 | 1.0883 | 1.1119 | 0.9512 | 1.0315 | 0.0402 |
| PRR25      | 1.0311 | 1.1661 | 1.0181 | 0.9110 | 1.0316 | 0.0523 |
| LOC647766  | 0.9338 | 1.1498 | 1.1040 | 0.9388 | 1.0316 | 0.0558 |
| BCKDHB     | 1.0213 | 1.2046 | 1.0972 | 0.8033 | 1.0316 | 0.0849 |
| TRIL       | 0.9813 | 1.0880 | 1.1023 | 0.9548 | 1.0316 | 0.0372 |
| CSNK1A1L   | 1.0012 | 1.1146 | 1.1388 | 0.8718 | 1.0316 | 0.0611 |
| ZMYM6      | 0.8739 | 1.4006 | 1.1196 | 0.7324 | 1.0316 | 0.1467 |
| LOC644480  | 1.0194 | 1.0699 | 1.0298 | 1.0074 | 1.0316 | 0.0136 |
| LOC649571  | 0.9685 | 1.1390 | 1.0629 | 0.9560 | 1.0316 | 0.0430 |
| FAM90A7    | 0.9457 | 1.1262 | 1.1137 | 0.9408 | 1.0316 | 0.0511 |
| MOS        | 1.0152 | 1.1813 | 0.9506 | 0.9793 | 1.0316 | 0.0516 |
| VWC2       | 0.9877 | 1.0152 | 1.1257 | 0.9980 | 1.0316 | 0.0319 |
| A4GALT     | 1.0347 | 1.1393 | 0.9889 | 0.9637 | 1.0316 | 0.0388 |
| GOLGA9P    | 1.0205 | 1.1574 | 1.0259 | 0.9230 | 1.0317 | 0.0481 |
| LOC649088  | 0.8920 | 1.1549 | 1.1344 | 0.9455 | 1.0317 | 0.0662 |
| ENO3       | 0.9434 | 1.3443 | 1.0004 | 0.8387 | 1.0317 | 0.1094 |
| DEFB137    | 0.9636 | 1.1172 | 1.0408 | 1.0051 | 1.0317 | 0.0326 |
| MIR320B2   | 0.9572 | 1.0124 | 1.2002 | 0.9572 | 1.0318 | 0.0576 |
| LOC1001336 | 0.8073 | 1.2558 | 1.2181 | 0.8459 | 1.0318 | 0.1190 |
| ADAMTS12   | 1.0216 | 1.0519 | 1.0645 | 0.9891 | 1.0318 | 0.0168 |



|            |        |        |        |        |        |        |
|------------|--------|--------|--------|--------|--------|--------|
| IL28B      | 0.9137 | 1.0601 | 1.2240 | 0.9296 | 1.0319 | 0.0720 |
| PJA1       | 0.9797 | 1.3382 | 0.9686 | 0.8410 | 1.0319 | 0.1068 |
| MIR24-2    | 0.8705 | 1.2113 | 1.1242 | 0.9215 | 1.0319 | 0.0811 |
| C12orf40   | 0.9545 | 1.1547 | 1.0564 | 0.9618 | 1.0319 | 0.0471 |
| LOC653701  | 0.8674 | 1.1661 | 1.1936 | 0.9003 | 1.0319 | 0.0859 |
| MBD3L2     | 1.0840 | 1.1482 | 0.9288 | 0.9665 | 1.0319 | 0.0509 |
| LOC1001308 | 0.9202 | 1.1590 | 1.1124 | 0.9360 | 1.0319 | 0.0608 |
| LGALS3     | 0.9392 | 1.1417 | 1.0482 | 0.9988 | 1.0320 | 0.0428 |
| C5orf43    | 0.9029 | 1.2930 | 1.0440 | 0.8879 | 1.0320 | 0.0939 |
| ZNF219     | 0.9971 | 1.2447 | 1.1075 | 0.7786 | 1.0320 | 0.0985 |
| LOC255411  | 1.0997 | 1.0549 | 1.0061 | 0.9672 | 1.0320 | 0.0288 |
| UCN3       | 0.8864 | 1.2027 | 1.0673 | 0.9714 | 1.0320 | 0.0679 |
| MIB2       | 1.0068 | 1.2071 | 1.0852 | 0.8290 | 1.0320 | 0.0792 |
| LOC1001300 | 1.0877 | 1.0985 | 1.0275 | 0.9143 | 1.0320 | 0.0422 |
| LOC643035  | 1.0137 | 1.0704 | 1.0715 | 0.9725 | 1.0321 | 0.0240 |
| TMPRSS9    | 0.9662 | 1.1741 | 1.1072 | 0.8808 | 1.0321 | 0.0665 |
| BDNFOS     | 0.9265 | 1.1159 | 1.1043 | 0.9816 | 1.0321 | 0.0465 |
| DHRS4L1    | 0.9082 | 1.1830 | 1.1112 | 0.9259 | 1.0321 | 0.0681 |
| CLEC7A     | 0.9849 | 1.1083 | 1.1174 | 0.9178 | 1.0321 | 0.0486 |
| RANBP2L1   | 1.0370 | 1.1842 | 1.0134 | 0.8937 | 1.0321 | 0.0596 |
| COL18A1    | 1.0055 | 1.1987 | 1.0274 | 0.8968 | 1.0321 | 0.0624 |
| HAPLN2     | 0.9144 | 1.2257 | 1.0243 | 0.9640 | 1.0321 | 0.0683 |
| IRX1       | 1.0776 | 1.2736 | 1.0075 | 0.7699 | 1.0322 | 0.1040 |
| LOC647341  | 0.9957 | 1.1338 | 1.0720 | 0.9273 | 1.0322 | 0.0449 |
| DSCR4      | 1.0696 | 1.1527 | 1.0740 | 0.8324 | 1.0322 | 0.0693 |
| FLJ42562   | 0.9147 | 1.1222 | 1.1047 | 0.9874 | 1.0322 | 0.0493 |
| PTGIR      | 1.0473 | 1.1064 | 1.0733 | 0.9021 | 1.0323 | 0.0450 |
| C15orf60   | 1.0371 | 1.1364 | 0.9546 | 1.0009 | 1.0323 | 0.0386 |
| MIR561     | 0.9838 | 1.2914 | 0.9383 | 0.9155 | 1.0323 | 0.0875 |
| C22orf36   | 1.0158 | 1.2200 | 1.0367 | 0.8566 | 1.0323 | 0.0744 |
| LOC1001345 | 0.9720 | 1.0123 | 1.1100 | 1.0349 | 1.0323 | 0.0290 |
| DSCR6      | 0.9247 | 1.2022 | 1.0031 | 0.9993 | 1.0323 | 0.0594 |
| LOC341356  | 1.1431 | 1.1296 | 0.9061 | 0.9505 | 1.0323 | 0.0608 |
| TMEM42     | 0.7692 | 1.5066 | 1.0605 | 0.7931 | 1.0323 | 0.1713 |
| LOC391769  | 0.9274 | 1.2034 | 1.0665 | 0.9321 | 1.0323 | 0.0655 |
| LOC649957  | 0.9094 | 1.1912 | 1.0788 | 0.9501 | 1.0324 | 0.0641 |
| CES7       | 1.0072 | 1.1277 | 1.0585 | 0.9361 | 1.0324 | 0.0405 |
| IMAA       | 0.9452 | 1.4064 | 0.9932 | 0.7847 | 1.0324 | 0.1324 |
| TTC16      | 1.0229 | 1.2359 | 0.9770 | 0.8937 | 1.0324 | 0.0729 |
| LOC652670  | 1.0317 | 1.1076 | 1.0312 | 0.9590 | 1.0324 | 0.0303 |
| RASA4P     | 0.7931 | 1.6292 | 0.9194 | 0.7880 | 1.0324 | 0.2012 |
| MLL5       | 0.9673 | 1.2353 | 1.0761 | 0.8509 | 1.0324 | 0.0818 |
| LOC400019  | 1.1461 | 1.0498 | 1.0660 | 0.8678 | 1.0324 | 0.0588 |
| MGC33556   | 0.9254 | 1.1243 | 1.1048 | 0.9752 | 1.0324 | 0.0487 |
| SNORD114-2 | 0.9937 | 1.1343 | 1.0648 | 0.9369 | 1.0324 | 0.0429 |
| DENND3     | 0.9729 | 1.1157 | 1.0904 | 0.9506 | 1.0324 | 0.0414 |

|            |        |        |        |        |        |        |
|------------|--------|--------|--------|--------|--------|--------|
| CHD8       | 0.9253 | 1.4396 | 0.8798 | 0.8849 | 1.0324 | 0.1361 |
| WNT3A      | 0.9418 | 1.0813 | 1.0564 | 1.0502 | 1.0324 | 0.0309 |
| ELF5       | 0.9620 | 1.1814 | 1.0836 | 0.9028 | 1.0325 | 0.0623 |
| SLC9A9     | 1.1222 | 1.1261 | 1.0008 | 0.8808 | 1.0325 | 0.0583 |
| NRBP1      | 0.9698 | 1.2541 | 1.0070 | 0.8990 | 1.0325 | 0.0772 |
| PION       | 0.9733 | 1.1853 | 1.0036 | 0.9677 | 1.0325 | 0.0516 |
| LOC343184  | 0.9929 | 1.2707 | 1.0710 | 0.7955 | 1.0325 | 0.0983 |
| LOC1001313 | 0.8998 | 1.2124 | 1.1417 | 0.8762 | 1.0325 | 0.0848 |
| LYZL4      | 0.9891 | 1.0958 | 1.0818 | 0.9633 | 1.0325 | 0.0330 |
| LOC643953  | 1.0992 | 1.0200 | 1.0403 | 0.9706 | 1.0325 | 0.0266 |
| LOC1001331 | 1.0810 | 1.0164 | 1.1118 | 0.9209 | 1.0325 | 0.0422 |
| LRRC36     | 1.0958 | 1.1204 | 0.9949 | 0.9192 | 1.0325 | 0.0465 |
| LOC727877  | 0.8836 | 1.2935 | 1.0304 | 0.9228 | 1.0325 | 0.0923 |
| LOC728264  | 0.9314 | 1.1529 | 1.1040 | 0.9419 | 1.0326 | 0.0563 |
| KIAA1862   | 0.9166 | 1.2283 | 0.9907 | 0.9946 | 1.0326 | 0.0677 |
| MSR1       | 0.9877 | 1.1778 | 0.9892 | 0.9756 | 1.0326 | 0.0485 |
| MARK4      | 1.0299 | 1.1387 | 0.9814 | 0.9803 | 1.0326 | 0.0372 |
| LOC646992  | 1.0355 | 1.0343 | 1.0496 | 1.0110 | 1.0326 | 0.0080 |
| VAT1       | 1.2124 | 1.3502 | 0.8681 | 0.6998 | 1.0326 | 0.1503 |
| LOC1001316 | 1.1110 | 1.1318 | 1.0384 | 0.8493 | 1.0326 | 0.0643 |
| LOC728914  | 1.0699 | 1.0996 | 1.0734 | 0.8875 | 1.0326 | 0.0488 |
| TTY3       | 0.9326 | 1.2034 | 1.0222 | 0.9723 | 1.0326 | 0.0598 |
| HIST1H2BA  | 1.0954 | 1.0496 | 1.0446 | 0.9409 | 1.0326 | 0.0326 |
| TMCC1      | 0.9786 | 1.1386 | 1.2018 | 0.8116 | 1.0326 | 0.0874 |
| GATA5      | 0.9951 | 1.1950 | 1.0552 | 0.8852 | 1.0326 | 0.0646 |
| FLG        | 0.9345 | 1.1712 | 1.1232 | 0.9016 | 1.0326 | 0.0672 |
| RGS9       | 1.0412 | 1.1302 | 1.0319 | 0.9272 | 1.0326 | 0.0416 |
| LOC1001318 | 1.1107 | 1.0212 | 1.0760 | 0.9227 | 1.0326 | 0.0410 |
| IKZF4      | 0.9187 | 1.0898 | 1.1796 | 0.9424 | 1.0327 | 0.0619 |
| SCAMP2     | 0.9622 | 1.4540 | 0.9103 | 0.8042 | 1.0327 | 0.1442 |
| CYP4A11    | 0.9721 | 1.1576 | 1.0042 | 0.9969 | 1.0327 | 0.0422 |
| GPR115     | 1.0105 | 1.1619 | 1.0635 | 0.8950 | 1.0327 | 0.0556 |
| NLGN1      | 1.0575 | 1.2142 | 1.0128 | 0.8464 | 1.0327 | 0.0756 |
| LOC144742  | 0.9573 | 1.1200 | 1.1633 | 0.8903 | 1.0327 | 0.0650 |
| LOC391578  | 0.9217 | 1.2703 | 1.0970 | 0.8420 | 1.0327 | 0.0954 |
| DARC       | 1.0805 | 1.0616 | 1.0787 | 0.9101 | 1.0327 | 0.0411 |
| LOC645885  | 1.0683 | 1.1570 | 1.0492 | 0.8566 | 1.0328 | 0.0633 |
| CAPZB      | 1.0248 | 1.3423 | 1.0272 | 0.7368 | 1.0328 | 0.1237 |
| METTL11B   | 0.9786 | 1.2095 | 1.0223 | 0.9207 | 1.0328 | 0.0625 |
| MIR877     | 1.0783 | 1.0311 | 1.0805 | 0.9413 | 1.0328 | 0.0326 |
| SHB        | 0.9734 | 1.2030 | 0.9800 | 0.9748 | 1.0328 | 0.0568 |
| SNAI2      | 1.0595 | 1.1160 | 1.0676 | 0.8882 | 1.0328 | 0.0498 |
| LOC727969  | 0.9997 | 1.1167 | 1.0738 | 0.9410 | 1.0328 | 0.0390 |
| LOC1001342 | 0.9059 | 1.2192 | 1.0280 | 0.9783 | 1.0328 | 0.0670 |
| LOC1001342 | 0.9819 | 1.2197 | 1.2081 | 0.7216 | 1.0328 | 0.1173 |
| LCN10      | 0.9865 | 1.3032 | 0.9494 | 0.8924 | 1.0329 | 0.0922 |

|            |        |        |        |        |        |        |
|------------|--------|--------|--------|--------|--------|--------|
| LOC647157  | 1.0265 | 1.0898 | 1.0696 | 0.9456 | 1.0329 | 0.0320 |
| LRRC29     | 0.9633 | 1.1136 | 1.0844 | 0.9702 | 1.0329 | 0.0387 |
| C15orf20   | 1.0543 | 1.0271 | 1.0788 | 0.9713 | 1.0329 | 0.0231 |
| C2orf39    | 1.0023 | 1.0768 | 1.0745 | 0.9779 | 1.0329 | 0.0252 |
| C7orf55    | 0.9816 | 1.4500 | 1.0270 | 0.6729 | 1.0329 | 0.1597 |
| CCL16      | 0.9522 | 1.1910 | 1.0413 | 0.9471 | 1.0329 | 0.0570 |
| UGT3A2     | 1.0813 | 1.0225 | 1.0189 | 1.0089 | 1.0329 | 0.0164 |
| LOC653143  | 0.9914 | 1.0741 | 1.0014 | 1.0648 | 1.0329 | 0.0213 |
| LOC647200  | 0.9504 | 1.3155 | 0.9460 | 0.9198 | 1.0329 | 0.0944 |
| LOC1001335 | 0.9939 | 1.1697 | 0.9726 | 0.9955 | 1.0329 | 0.0459 |
| FBXW4      | 0.8892 | 1.4297 | 1.0288 | 0.7841 | 1.0329 | 0.1414 |
| TIGA1      | 0.8784 | 1.5018 | 1.0299 | 0.7216 | 1.0329 | 0.1685 |
| LOC641957  | 0.9202 | 1.1165 | 1.0050 | 1.0903 | 1.0330 | 0.0445 |
| METTL7B    | 1.0600 | 1.0347 | 1.0597 | 0.9776 | 1.0330 | 0.0194 |
| NPM1       | 0.9857 | 1.1526 | 1.0573 | 0.9364 | 1.0330 | 0.0470 |
| LOC727855  | 1.0492 | 1.1273 | 1.0205 | 0.9350 | 1.0330 | 0.0397 |
| TAF7       | 0.9302 | 1.2656 | 1.1510 | 0.7853 | 1.0330 | 0.1080 |
| LOC645839  | 1.0314 | 1.1365 | 1.0575 | 0.9068 | 1.0330 | 0.0477 |
| LOC644444  | 1.0544 | 1.0632 | 1.0633 | 0.9512 | 1.0330 | 0.0273 |
| OXR1       | 0.9885 | 1.3266 | 0.9756 | 0.8414 | 1.0330 | 0.1034 |
| CGB        | 0.9100 | 1.2743 | 1.0096 | 0.9382 | 1.0330 | 0.0831 |
| AGXT2L2    | 0.9850 | 1.2688 | 1.0412 | 0.8373 | 1.0331 | 0.0896 |
| LOC642014  | 0.9119 | 1.0429 | 1.0880 | 1.0898 | 1.0331 | 0.0419 |
| TYROBP     | 0.9790 | 1.1169 | 1.1118 | 0.9249 | 1.0332 | 0.0482 |
| LOC642863  | 0.9737 | 1.0381 | 1.2358 | 0.8853 | 1.0332 | 0.0744 |
| KIAA1543   | 1.1460 | 1.1339 | 1.0434 | 0.8094 | 1.0332 | 0.0780 |
| USP47      | 0.9102 | 1.1834 | 1.1436 | 0.8955 | 1.0332 | 0.0757 |
| LOC647333  | 1.0218 | 1.0715 | 1.1770 | 0.8626 | 1.0332 | 0.0655 |
| LOC1001337 | 0.9326 | 1.2095 | 1.1148 | 0.8759 | 1.0332 | 0.0778 |
| DLGAP1     | 0.9973 | 1.1512 | 1.0135 | 0.9709 | 1.0332 | 0.0403 |
| LOC1001317 | 0.9650 | 1.0666 | 1.2450 | 0.8562 | 1.0332 | 0.0826 |
| AP3B2      | 0.9888 | 1.1376 | 1.0530 | 0.9534 | 1.0332 | 0.0404 |
| GBP7       | 0.9002 | 1.1536 | 1.0915 | 0.9876 | 1.0332 | 0.0560 |
| LOC648846  | 0.9388 | 1.1136 | 1.1518 | 0.9287 | 1.0332 | 0.0580 |
| RBM4       | 0.8720 | 1.4959 | 0.9921 | 0.7729 | 1.0333 | 0.1606 |
| CRIP2      | 0.9854 | 1.3453 | 1.0249 | 0.7775 | 1.0333 | 0.1173 |
| LOC550631  | 1.1067 | 1.0842 | 1.0071 | 0.9350 | 1.0333 | 0.0391 |
| FUT2       | 0.9752 | 1.0562 | 1.0810 | 1.0208 | 1.0333 | 0.0230 |
| MRP63      | 0.8777 | 1.3757 | 1.1766 | 0.7032 | 1.0333 | 0.1503 |
| LOC1001306 | 0.9646 | 1.0705 | 1.1899 | 0.9083 | 1.0333 | 0.0621 |
| LOC391555  | 1.1501 | 0.9540 | 1.0374 | 0.9919 | 1.0333 | 0.0425 |
| CEACAM18   | 1.0289 | 1.1471 | 1.0524 | 0.9050 | 1.0333 | 0.0498 |
| LOC645451  | 1.0429 | 1.1044 | 0.9414 | 1.0448 | 1.0334 | 0.0338 |
| LOC139587  | 1.0643 | 1.0479 | 1.1152 | 0.9061 | 1.0334 | 0.0448 |
| LOC646176  | 0.9922 | 1.0604 | 1.2558 | 0.8252 | 1.0334 | 0.0891 |
| LRTOMT     | 0.9990 | 1.1579 | 1.1450 | 0.8317 | 1.0334 | 0.0763 |

|            |        |        |        |        |        |        |
|------------|--------|--------|--------|--------|--------|--------|
| CECR6      | 0.9169 | 1.1957 | 1.0350 | 0.9862 | 1.0335 | 0.0593 |
| C17orf108  | 1.0896 | 1.1146 | 1.0654 | 0.8642 | 1.0335 | 0.0573 |
| FA2H       | 0.9614 | 1.1401 | 1.0865 | 0.9459 | 1.0335 | 0.0475 |
| P4HA3      | 1.0744 | 1.0065 | 1.0318 | 1.0213 | 1.0335 | 0.0146 |
| TSPAN12    | 1.0118 | 1.1332 | 1.1197 | 0.8694 | 1.0335 | 0.0611 |
| LOC648374  | 1.1084 | 1.0349 | 0.9991 | 0.9917 | 1.0335 | 0.0267 |
| LOC651581  | 0.9309 | 1.0617 | 1.0986 | 1.0431 | 1.0336 | 0.0361 |
| LOC1001339 | 1.0134 | 0.9980 | 1.0590 | 1.0639 | 1.0336 | 0.0164 |
| KRTHB6     | 0.9591 | 1.0330 | 1.1258 | 1.0164 | 1.0336 | 0.0346 |
| C19orf47   | 1.0210 | 1.1181 | 1.1034 | 0.8919 | 1.0336 | 0.0519 |
| LOC643505  | 1.0276 | 1.1759 | 0.9833 | 0.9476 | 1.0336 | 0.0502 |
| FAM109B    | 0.9742 | 1.1504 | 1.1035 | 0.9062 | 1.0336 | 0.0565 |
| LOC644316  | 0.8570 | 1.1885 | 1.0991 | 0.9898 | 1.0336 | 0.0715 |
| LOC554203  | 0.9272 | 1.1283 | 1.2323 | 0.8468 | 1.0336 | 0.0888 |
| LOC1001336 | 1.0831 | 1.0425 | 1.0762 | 0.9328 | 1.0337 | 0.0348 |
| MIR337     | 0.9730 | 1.1045 | 1.0757 | 0.9815 | 1.0337 | 0.0332 |
| GPR183     | 0.9754 | 1.1427 | 1.0289 | 0.9876 | 1.0337 | 0.0381 |
| ANKRD55    | 0.9889 | 1.1147 | 1.0906 | 0.9404 | 1.0337 | 0.0413 |
| SFTA2      | 1.0021 | 1.0911 | 1.1298 | 0.9117 | 1.0337 | 0.0486 |
| LOC643787  | 0.9664 | 1.1847 | 1.0335 | 0.9501 | 1.0337 | 0.0535 |
| BZRAP1     | 0.8641 | 1.1878 | 1.0774 | 1.0054 | 1.0337 | 0.0678 |
| PCGF2      | 1.0342 | 1.3985 | 0.9183 | 0.7837 | 1.0337 | 0.1319 |
| LOC1001335 | 0.9170 | 1.1326 | 1.0599 | 1.0254 | 1.0337 | 0.0449 |
| WDR7       | 0.9118 | 1.3800 | 1.0145 | 0.8287 | 1.0337 | 0.1215 |
| SOX2       | 1.0148 | 1.1238 | 1.0796 | 0.9168 | 1.0337 | 0.0450 |
| LOC653720  | 0.8299 | 1.2763 | 1.0531 | 0.9757 | 1.0338 | 0.0932 |
| UGT1A4     | 0.9638 | 1.1729 | 1.0719 | 0.9266 | 1.0338 | 0.0557 |
| LOC1001332 | 1.0008 | 1.1267 | 1.0338 | 0.9739 | 1.0338 | 0.0333 |
| ZCCHC5     | 1.0914 | 1.0917 | 1.0043 | 0.9479 | 1.0338 | 0.0353 |
| LOC646344  | 0.9390 | 1.2665 | 0.9889 | 0.9409 | 1.0338 | 0.0784 |
| C9orf61    | 1.0597 | 1.0895 | 1.0804 | 0.9060 | 1.0339 | 0.0431 |
| ZCCHC3     | 0.9903 | 1.1592 | 1.1098 | 0.8762 | 1.0339 | 0.0634 |
| TMEM66     | 0.9429 | 1.4131 | 1.0628 | 0.7168 | 1.0339 | 0.1453 |
| LOC650771  | 0.9315 | 1.1526 | 1.0342 | 1.0172 | 1.0339 | 0.0455 |
| CHPF2      | 0.9706 | 1.2399 | 0.9745 | 0.9506 | 1.0339 | 0.0688 |
| ARMC4      | 0.9850 | 1.0544 | 1.0350 | 1.0613 | 1.0339 | 0.0172 |
| STAT5B     | 1.1506 | 1.1555 | 0.9815 | 0.8482 | 1.0339 | 0.0739 |
| LOC392395  | 1.0023 | 1.1312 | 1.0500 | 0.9523 | 1.0339 | 0.0381 |
| GOLGA2LY2  | 0.9300 | 1.1838 | 1.0266 | 0.9954 | 1.0340 | 0.0538 |
| OSTalpha   | 0.9436 | 1.2667 | 1.0126 | 0.9130 | 1.0340 | 0.0803 |
| LOC402571  | 1.1540 | 1.0815 | 0.9338 | 0.9666 | 1.0340 | 0.0510 |
| LOC1001305 | 1.0927 | 1.0368 | 1.0587 | 0.9477 | 1.0340 | 0.0310 |
| SOX3       | 1.0286 | 1.0335 | 1.1409 | 0.9330 | 1.0340 | 0.0425 |
| LOC646134  | 0.9593 | 1.1537 | 1.1360 | 0.8871 | 1.0340 | 0.0658 |
| ARMS2      | 1.0602 | 1.1272 | 0.9923 | 0.9564 | 1.0340 | 0.0378 |
| LOC652265  | 0.9415 | 1.2295 | 1.1082 | 0.8569 | 1.0340 | 0.0835 |

|            |        |        |        |        |        |        |
|------------|--------|--------|--------|--------|--------|--------|
| ANKS1A     | 0.9024 | 1.4459 | 1.0086 | 0.7793 | 1.0340 | 0.1450 |
| LOC653288  | 1.0711 | 1.0637 | 1.0735 | 0.9279 | 1.0341 | 0.0354 |
| OR5H6      | 1.0158 | 1.1377 | 1.0438 | 0.9389 | 1.0341 | 0.0411 |
| MIR610     | 0.9821 | 1.1255 | 1.1538 | 0.8750 | 1.0341 | 0.0650 |
| LOC644518  | 1.0009 | 1.0873 | 1.0392 | 1.0091 | 1.0341 | 0.0196 |
| LOC1001303 | 1.0014 | 1.1567 | 0.9572 | 1.0213 | 1.0341 | 0.0430 |
| C22orf34   | 0.9647 | 1.0516 | 1.0932 | 1.0271 | 1.0341 | 0.0269 |
| GYS2       | 0.9917 | 1.1451 | 1.0468 | 0.9530 | 1.0341 | 0.0417 |
| FAM155B    | 1.0522 | 1.1648 | 1.0525 | 0.8671 | 1.0341 | 0.0617 |
| RIC3       | 0.9954 | 1.0661 | 1.1983 | 0.8771 | 1.0342 | 0.0672 |
| CELA3B     | 0.9826 | 1.0822 | 1.0685 | 1.0037 | 1.0342 | 0.0243 |
| LOC1001304 | 0.8571 | 1.4485 | 1.0853 | 0.7460 | 1.0342 | 0.1551 |
| KIAA1429   | 0.9666 | 1.4275 | 1.0076 | 0.7353 | 1.0342 | 0.1442 |
| CLCNKB     | 1.0400 | 1.0472 | 1.1197 | 0.9301 | 1.0343 | 0.0391 |
| RSPRY1     | 0.8505 | 1.3993 | 1.0446 | 0.8427 | 1.0343 | 0.1303 |
| GZMB       | 1.0089 | 1.1798 | 1.0085 | 0.9399 | 1.0343 | 0.0511 |
| LOC554208  | 0.9067 | 1.3474 | 1.0326 | 0.8505 | 1.0343 | 0.1111 |
| CHRM1      | 1.0036 | 1.1244 | 1.0184 | 0.9907 | 1.0343 | 0.0306 |
| MIRLET7F2  | 0.9778 | 1.0827 | 1.1760 | 0.9007 | 1.0343 | 0.0602 |
| PUS10      | 0.8709 | 1.2562 | 1.1166 | 0.8936 | 1.0343 | 0.0924 |
| MIR1826    | 0.9343 | 1.1376 | 1.0216 | 1.0438 | 1.0343 | 0.0418 |
| LIMK1      | 0.9962 | 1.2509 | 0.9834 | 0.9068 | 1.0343 | 0.0748 |
| CYB561D1   | 0.9952 | 1.3906 | 0.9811 | 0.7704 | 1.0343 | 0.1294 |
| MAPKBP1    | 1.0482 | 1.1540 | 1.0333 | 0.9020 | 1.0344 | 0.0517 |
| MIR1207    | 0.9628 | 1.1077 | 1.0806 | 0.9865 | 1.0344 | 0.0353 |
| LOC644989  | 1.0573 | 1.1059 | 1.0320 | 0.9425 | 1.0344 | 0.0342 |
| LOC650214  | 0.9654 | 1.1149 | 1.0232 | 1.0341 | 1.0344 | 0.0308 |
| JAKMIP2    | 1.0324 | 1.1046 | 1.1060 | 0.8947 | 1.0344 | 0.0496 |
| OR10H2     | 0.9773 | 1.0276 | 1.1082 | 1.0248 | 1.0345 | 0.0271 |
| LHFPL5     | 1.0609 | 1.1065 | 0.9568 | 1.0138 | 1.0345 | 0.0321 |
| TMEM68     | 0.9640 | 1.1554 | 1.1109 | 0.9077 | 1.0345 | 0.0588 |
| LOC642637  | 1.0105 | 1.2046 | 1.0136 | 0.9094 | 1.0345 | 0.0616 |
| TMEM9      | 0.9047 | 1.4500 | 1.0208 | 0.7627 | 1.0345 | 0.1482 |
| LOC136143  | 0.8750 | 1.3529 | 1.1928 | 0.7176 | 1.0346 | 0.1450 |
| LOC1001281 | 0.9849 | 1.1495 | 1.0518 | 0.9521 | 1.0346 | 0.0436 |
| LOC649667  | 0.9745 | 1.0845 | 1.0235 | 1.0558 | 1.0346 | 0.0236 |
| NKX2-8     | 0.9972 | 1.1575 | 0.9904 | 0.9934 | 1.0346 | 0.0410 |
| KRTAP1-3   | 1.0104 | 1.1524 | 1.0482 | 0.9275 | 1.0346 | 0.0467 |
| DOCK6      | 1.0340 | 1.2791 | 1.0589 | 0.7666 | 1.0346 | 0.1049 |
| SCGB1C1    | 1.0182 | 1.1104 | 1.0093 | 1.0007 | 1.0346 | 0.0255 |
| INPP5D     | 1.0518 | 1.0688 | 1.0727 | 0.9454 | 1.0347 | 0.0301 |
| CLCA1      | 0.9839 | 1.1660 | 1.0041 | 0.9847 | 1.0347 | 0.0440 |
| CCDC3      | 0.9047 | 1.2725 | 1.0471 | 0.9145 | 1.0347 | 0.0857 |
| MAGED1     | 0.9311 | 1.3829 | 1.0528 | 0.7719 | 1.0347 | 0.1296 |
| LOC646283  | 1.0329 | 1.2123 | 1.0388 | 0.8547 | 1.0347 | 0.0730 |
| SATB1      | 1.0197 | 1.1787 | 0.9996 | 0.9408 | 1.0347 | 0.0508 |

|            |        |        |        |        |        |        |
|------------|--------|--------|--------|--------|--------|--------|
| MIR606     | 1.0144 | 0.9705 | 1.1054 | 1.0486 | 1.0347 | 0.0285 |
| LOC652839  | 0.9820 | 1.2097 | 1.0416 | 0.9056 | 1.0347 | 0.0646 |
| LOC1001307 | 0.9365 | 1.1846 | 1.0553 | 0.9625 | 1.0347 | 0.0561 |
| LOC728126  | 0.7950 | 1.5324 | 1.2499 | 0.5617 | 1.0347 | 0.2189 |
| KRT32      | 0.9033 | 1.0973 | 1.1498 | 0.9886 | 1.0348 | 0.0552 |
| LOC729974  | 1.0541 | 1.0851 | 1.0824 | 0.9175 | 1.0348 | 0.0397 |
| RPL36      | 0.9403 | 1.2314 | 1.1770 | 0.7904 | 1.0348 | 0.1031 |
| PLXND1     | 0.8739 | 1.2025 | 1.0926 | 0.9701 | 1.0348 | 0.0716 |
| STMN3      | 1.0174 | 1.4078 | 0.9982 | 0.7158 | 1.0348 | 0.1422 |
| SLC1A7     | 1.0031 | 1.2440 | 1.0089 | 0.8833 | 1.0348 | 0.0755 |
| LEPRE1     | 0.9986 | 1.3674 | 0.9706 | 0.8027 | 1.0348 | 0.1190 |
| C21orf33   | 0.8935 | 1.4803 | 1.0786 | 0.6870 | 1.0348 | 0.1687 |
| CYLC2      | 1.0052 | 1.0179 | 1.0927 | 1.0236 | 1.0349 | 0.0197 |
| LOC1001330 | 0.9297 | 1.1285 | 1.1039 | 0.9774 | 1.0349 | 0.0482 |
| TTY4C      | 0.9608 | 1.1758 | 1.0496 | 0.9533 | 1.0349 | 0.0518 |
| MIR135B    | 1.1002 | 1.1410 | 0.9892 | 0.9092 | 1.0349 | 0.0528 |
| DEFB107B   | 0.9497 | 1.0586 | 1.1038 | 1.0275 | 1.0349 | 0.0324 |
| IL10RB     | 0.8924 | 1.3324 | 1.1588 | 0.7559 | 1.0349 | 0.1297 |
| LOC729619  | 0.9198 | 1.1302 | 1.1952 | 0.8945 | 1.0349 | 0.0751 |
| CDC40      | 0.9717 | 1.3853 | 0.9433 | 0.8394 | 1.0349 | 0.1202 |
| PTH2R      | 0.9973 | 1.1269 | 1.0390 | 0.9766 | 1.0349 | 0.0333 |
| LOC154872  | 0.9926 | 1.1816 | 0.9813 | 0.9843 | 1.0350 | 0.0489 |
| LOC1001306 | 1.0230 | 1.0730 | 1.1260 | 0.9180 | 1.0350 | 0.0443 |
| PARP9      | 1.0696 | 1.3853 | 0.9026 | 0.7825 | 1.0350 | 0.1308 |
| LOC1001346 | 0.8081 | 1.3140 | 0.9903 | 1.0275 | 1.0350 | 0.1046 |
| LOC284821  | 0.7365 | 1.3590 | 1.1318 | 0.9126 | 1.0350 | 0.1349 |
| SLC2A11    | 1.0537 | 1.1741 | 1.0090 | 0.9033 | 1.0350 | 0.0561 |
| LOC648852  | 0.9978 | 1.0095 | 1.3711 | 0.7618 | 1.0350 | 0.1257 |
| LOC1001306 | 1.0537 | 1.0712 | 1.0017 | 1.0135 | 1.0350 | 0.0164 |
| LOC653348  | 1.0513 | 1.1054 | 1.0594 | 0.9240 | 1.0350 | 0.0389 |
| C7orf10    | 1.0890 | 1.1574 | 1.0363 | 0.8574 | 1.0350 | 0.0642 |
| CCNYL2     | 0.9283 | 1.1357 | 1.1257 | 0.9506 | 1.0350 | 0.0554 |
| CCND2      | 1.0562 | 1.1158 | 0.9892 | 0.9790 | 1.0351 | 0.0319 |
| LOC650843  | 1.1435 | 1.0102 | 1.0195 | 0.9670 | 1.0351 | 0.0379 |
| YKT6       | 0.9745 | 0.9965 | 1.2649 | 0.9044 | 1.0351 | 0.0791 |
| LOC645359  | 0.9897 | 1.1971 | 0.9882 | 0.9658 | 1.0352 | 0.0543 |
| C1orf105   | 1.0219 | 1.2071 | 1.0318 | 0.8800 | 1.0352 | 0.0670 |
| GPER       | 0.9653 | 1.5518 | 0.9141 | 0.7095 | 1.0352 | 0.1808 |
| NDUFA1     | 1.0473 | 1.3520 | 0.9361 | 0.8054 | 1.0352 | 0.1166 |
| LOC643784  | 1.0264 | 1.0520 | 1.1193 | 0.9432 | 1.0352 | 0.0364 |
| ADK        | 0.8399 | 1.3514 | 1.2060 | 0.7437 | 1.0352 | 0.1450 |
| RFPL2      | 1.0529 | 1.0868 | 1.0700 | 0.9314 | 1.0353 | 0.0353 |
| FAM135B    | 1.0049 | 1.1865 | 1.0879 | 0.8618 | 1.0353 | 0.0687 |
| RPL18      | 0.9873 | 1.1284 | 1.1636 | 0.8619 | 1.0353 | 0.0692 |
| ZNF579     | 0.9398 | 1.2095 | 1.0046 | 0.9874 | 1.0353 | 0.0597 |
| LOC644632  | 1.0201 | 1.1553 | 1.0190 | 0.9470 | 1.0353 | 0.0435 |

|            |        |        |        |        |        |        |
|------------|--------|--------|--------|--------|--------|--------|
| LOC1001286 | 1.1232 | 1.1336 | 1.0064 | 0.8782 | 1.0353 | 0.0598 |
| SNORD90    | 0.9385 | 1.1685 | 1.1044 | 0.9301 | 1.0354 | 0.0598 |
| ZNF260     | 0.8594 | 1.5442 | 0.9467 | 0.7912 | 1.0354 | 0.1726 |
| MIR1252    | 0.9750 | 1.2014 | 0.9436 | 1.0216 | 1.0354 | 0.0576 |
| ZSCAN12    | 0.9184 | 1.1991 | 1.2640 | 0.7601 | 1.0354 | 0.1185 |
| FAM54B     | 0.9246 | 1.3045 | 1.1429 | 0.7697 | 1.0354 | 0.1179 |
| KCTD12     | 1.0233 | 1.0988 | 1.1177 | 0.9019 | 1.0354 | 0.0489 |
| HS3ST5     | 0.9411 | 1.0895 | 1.1061 | 1.0050 | 1.0354 | 0.0385 |
| TFE3       | 0.9091 | 1.2852 | 1.1099 | 0.8377 | 1.0355 | 0.1012 |
| C11orf31   | 0.9532 | 1.2363 | 1.1800 | 0.7725 | 1.0355 | 0.1069 |
| LOC1001325 | 0.9140 | 1.1214 | 1.1498 | 0.9568 | 1.0355 | 0.0587 |
| MIR660     | 0.9572 | 1.0995 | 1.0659 | 1.0196 | 1.0355 | 0.0308 |
| C7orf29    | 1.0323 | 1.1952 | 1.0708 | 0.8438 | 1.0355 | 0.0728 |
| TAT        | 1.0784 | 1.0989 | 1.0168 | 0.9481 | 1.0355 | 0.0340 |
| GNAS       | 0.9738 | 1.2210 | 1.1292 | 0.8181 | 1.0355 | 0.0886 |
| LOC1001300 | 0.9863 | 1.0385 | 1.1102 | 1.0071 | 1.0355 | 0.0271 |
| ASCL3      | 1.0154 | 1.1846 | 1.0589 | 0.8834 | 1.0356 | 0.0621 |
| NRL        | 1.0100 | 1.0865 | 1.0589 | 0.9869 | 1.0356 | 0.0227 |
| PAQR5      | 1.0249 | 1.1289 | 1.0259 | 0.9627 | 1.0356 | 0.0344 |
| C17orf60   | 0.9780 | 1.0068 | 1.3400 | 0.8176 | 1.0356 | 0.1097 |
| EPN3       | 1.2274 | 1.2611 | 0.9698 | 0.6842 | 1.0356 | 0.1340 |
| EIF1AY     | 0.9400 | 1.3165 | 1.1794 | 0.7066 | 1.0356 | 0.1345 |
| LOC646139  | 1.0841 | 1.1469 | 1.0363 | 0.8752 | 1.0356 | 0.0581 |
| LOC652743  | 0.9422 | 1.0360 | 1.2431 | 0.9213 | 1.0356 | 0.0735 |
| RBMS2      | 0.9413 | 1.2475 | 1.1305 | 0.8234 | 1.0357 | 0.0948 |
| LOC1001284 | 0.8843 | 1.2958 | 1.0525 | 0.9101 | 1.0357 | 0.0943 |
| WIP12      | 1.0289 | 1.3190 | 1.0326 | 0.7622 | 1.0357 | 0.1137 |
| IGSF8      | 0.9798 | 1.1003 | 1.1882 | 0.8744 | 1.0357 | 0.0687 |
| GTDC1      | 0.9500 | 1.1533 | 1.1115 | 0.9281 | 1.0357 | 0.0566 |
| CENTD2     | 0.9309 | 1.2879 | 1.0133 | 0.9110 | 1.0358 | 0.0869 |
| LOC727924  | 0.9701 | 1.2829 | 1.0290 | 0.8612 | 1.0358 | 0.0894 |
| LOC442710  | 0.9058 | 1.1041 | 1.0714 | 1.0620 | 1.0358 | 0.0443 |
| JMY        | 0.9691 | 1.1946 | 1.1304 | 0.8492 | 1.0358 | 0.0782 |
| PLA2G4A    | 1.0638 | 1.1005 | 0.9949 | 0.9842 | 1.0358 | 0.0278 |
| LOC653275  | 0.9173 | 1.1899 | 1.1659 | 0.8702 | 1.0358 | 0.0827 |
| LOC651192  | 1.0323 | 1.1363 | 1.0152 | 0.9596 | 1.0358 | 0.0369 |
| KCNMB1     | 1.0436 | 1.0533 | 1.0567 | 0.9900 | 1.0359 | 0.0156 |
| LOC134121  | 0.9640 | 1.1606 | 1.0678 | 0.9514 | 1.0360 | 0.0491 |
| ANKRD37    | 1.2218 | 1.3019 | 0.8905 | 0.7297 | 1.0360 | 0.1355 |
| TAOK2      | 1.0208 | 1.2576 | 1.0001 | 0.8654 | 1.0360 | 0.0815 |
| LOC650428  | 1.0417 | 1.1594 | 0.9610 | 0.9818 | 1.0360 | 0.0446 |
| LOC400759  | 0.9325 | 1.1073 | 1.1191 | 0.9852 | 1.0360 | 0.0459 |
| ARFGEF1    | 0.9989 | 1.4506 | 0.9577 | 0.7368 | 1.0360 | 0.1497 |
| LOC202051  | 0.9787 | 1.1942 | 1.1031 | 0.8681 | 1.0360 | 0.0713 |
| LOC1001279 | 0.9427 | 1.2181 | 1.0548 | 0.9286 | 1.0360 | 0.0669 |
| CSTF2T     | 0.9746 | 1.3041 | 1.1826 | 0.6830 | 1.0361 | 0.1359 |

|            |        |        |        |        |        |        |
|------------|--------|--------|--------|--------|--------|--------|
| LOC392100  | 0.9597 | 1.1387 | 1.0732 | 0.9727 | 1.0361 | 0.0426 |
| LOC341112  | 0.9634 | 1.2076 | 1.0554 | 0.9180 | 1.0361 | 0.0639 |
| ABTB1      | 1.1476 | 1.1377 | 1.0095 | 0.8496 | 1.0361 | 0.0697 |
| GPR153     | 0.9980 | 1.1884 | 0.9512 | 1.0069 | 1.0361 | 0.0522 |
| LOC644338  | 0.9436 | 1.2448 | 1.1334 | 0.8227 | 1.0361 | 0.0945 |
| ST8SIA2    | 1.0611 | 1.0732 | 1.0574 | 0.9530 | 1.0361 | 0.0279 |
| CREM       | 0.9839 | 1.0574 | 1.0924 | 1.0109 | 1.0362 | 0.0241 |
| LOC643700  | 1.0738 | 1.0843 | 1.0310 | 0.9556 | 1.0362 | 0.0292 |
| LOC401358  | 1.0019 | 1.1566 | 1.0279 | 0.9582 | 1.0362 | 0.0426 |
| C4orf6     | 0.9379 | 1.1670 | 1.0477 | 0.9921 | 1.0362 | 0.0490 |
| PI16       | 1.0011 | 1.1149 | 1.0221 | 1.0067 | 1.0362 | 0.0266 |
| ZNF507     | 0.9186 | 1.2025 | 1.1252 | 0.8985 | 1.0362 | 0.0755 |
| CCDC65     | 1.0632 | 1.1557 | 1.0384 | 0.8876 | 1.0362 | 0.0556 |
| MIR934     | 0.9837 | 1.1760 | 1.1843 | 0.8011 | 1.0363 | 0.0911 |
| RPS15A     | 0.9175 | 1.1864 | 1.1889 | 0.8524 | 1.0363 | 0.0884 |
| TRYX3      | 0.9298 | 1.1027 | 1.1091 | 1.0035 | 1.0363 | 0.0429 |
| GTF2H5     | 1.0225 | 1.2091 | 1.0877 | 0.8258 | 1.0363 | 0.0801 |
| ADRA1B     | 0.9696 | 1.0561 | 1.0470 | 1.0725 | 1.0363 | 0.0229 |
| DYNC2H1    | 0.9424 | 1.2555 | 1.0485 | 0.8989 | 1.0363 | 0.0795 |
| PVRL3      | 1.0393 | 1.0871 | 1.1005 | 0.9184 | 1.0363 | 0.0415 |
| LOC390231  | 0.9491 | 1.0645 | 1.1247 | 1.0071 | 1.0363 | 0.0377 |
| ABHD12B    | 0.9866 | 1.1360 | 1.0743 | 0.9485 | 1.0363 | 0.0424 |
| IQCF1      | 0.9017 | 1.1593 | 1.0757 | 1.0086 | 1.0363 | 0.0544 |
| FOXO3      | 0.9678 | 1.4937 | 0.9104 | 0.7735 | 1.0364 | 0.1578 |
| GALNT13    | 0.9675 | 1.2067 | 1.0880 | 0.8833 | 1.0364 | 0.0706 |
| LOC1001297 | 1.0053 | 1.1038 | 1.0382 | 0.9981 | 1.0364 | 0.0241 |
| TLN1       | 1.0115 | 1.3144 | 0.9837 | 0.8359 | 1.0364 | 0.1004 |
| NCRNA00028 | 1.1166 | 1.0993 | 1.0713 | 0.8583 | 1.0364 | 0.0601 |
| LOC642155  | 0.9380 | 1.1000 | 1.0878 | 1.0198 | 1.0364 | 0.0372 |
| CX3CL1     | 0.9941 | 1.1216 | 1.0947 | 0.9353 | 1.0364 | 0.0435 |
| KPNA4      | 0.8466 | 1.5176 | 1.0439 | 0.7375 | 1.0364 | 0.1725 |
| TMEM63A    | 1.0683 | 1.1375 | 1.0400 | 0.8998 | 1.0364 | 0.0499 |
| JSRP1      | 0.9351 | 1.2141 | 1.0030 | 0.9935 | 1.0364 | 0.0611 |
| PTPMT1     | 0.8753 | 1.3050 | 1.2519 | 0.7136 | 1.0364 | 0.1440 |
| C8orf78    | 0.9717 | 1.0174 | 1.1098 | 1.0470 | 1.0365 | 0.0290 |
| LOC727908  | 0.9826 | 1.1591 | 1.0826 | 0.9215 | 1.0365 | 0.0527 |
| LOC728492  | 1.1283 | 1.2497 | 1.0266 | 0.7413 | 1.0365 | 0.1085 |
| LHX8       | 0.9532 | 1.0765 | 1.0991 | 1.0172 | 1.0365 | 0.0327 |
| GRB2       | 0.8498 | 1.4731 | 1.0613 | 0.7620 | 1.0365 | 0.1585 |
| LOC731641  | 1.1296 | 1.1028 | 0.9734 | 0.9403 | 1.0365 | 0.0468 |
| LOC646168  | 1.0774 | 1.0655 | 1.0344 | 0.9689 | 1.0366 | 0.0243 |
| KRTAP4-8   | 0.9299 | 1.0993 | 1.0728 | 1.0442 | 1.0366 | 0.0373 |
| UCN        | 1.0577 | 1.1993 | 1.0363 | 0.8530 | 1.0366 | 0.0711 |
| LOC338750  | 0.9501 | 1.0591 | 1.0699 | 1.0672 | 1.0366 | 0.0289 |
| LIF        | 1.0831 | 1.3675 | 0.8944 | 0.8014 | 1.0366 | 0.1249 |
| ASAP1IT1   | 1.0136 | 1.0960 | 1.1019 | 0.9348 | 1.0366 | 0.0395 |



|            |        |        |        |        |        |        |
|------------|--------|--------|--------|--------|--------|--------|
| FLJ45832   | 0.9807 | 1.2741 | 0.9918 | 0.8999 | 1.0366 | 0.0818 |
| GLRA1      | 1.0081 | 1.0754 | 1.0546 | 1.0083 | 1.0366 | 0.0169 |
| PPM1H      | 1.0297 | 1.2816 | 1.0795 | 0.7556 | 1.0366 | 0.1083 |
| LOC441126  | 1.0587 | 1.2126 | 1.0633 | 0.8118 | 1.0366 | 0.0830 |
| GPATCH2    | 1.1010 | 1.3524 | 0.9370 | 0.7561 | 1.0366 | 0.1266 |
| MAGEB6     | 0.9903 | 1.0589 | 1.0733 | 1.0243 | 1.0367 | 0.0186 |
| LOC1001334 | 0.9798 | 1.1169 | 1.1097 | 0.9403 | 1.0367 | 0.0450 |
| HINT3      | 1.0149 | 1.3623 | 1.0374 | 0.7322 | 1.0367 | 0.1288 |
| LOC649967  | 0.9960 | 1.0932 | 1.0713 | 0.9863 | 1.0367 | 0.0268 |
| LOC645133  | 1.0191 | 1.1821 | 1.0811 | 0.8645 | 1.0367 | 0.0665 |
| UCP1       | 1.0410 | 1.1350 | 1.0650 | 0.9060 | 1.0368 | 0.0479 |
| C15orf54   | 0.9670 | 1.1385 | 1.0805 | 0.9612 | 1.0368 | 0.0436 |
| RELL2      | 1.0356 | 1.2082 | 0.9859 | 0.9175 | 1.0368 | 0.0620 |
| CASR       | 0.9637 | 1.1528 | 1.1431 | 0.8876 | 1.0368 | 0.0660 |
| MIR1301    | 0.8884 | 1.1535 | 1.1241 | 0.9813 | 1.0368 | 0.0621 |
| ATP4A      | 1.0828 | 1.1561 | 0.9966 | 0.9118 | 1.0368 | 0.0529 |
| LOC650646  | 0.9798 | 1.2045 | 1.2271 | 0.7361 | 1.0369 | 0.1147 |
| H2AFY2     | 0.9840 | 1.3608 | 0.9202 | 0.8827 | 1.0369 | 0.1100 |
| LOC645888  | 1.0566 | 1.2034 | 1.0789 | 0.8088 | 1.0369 | 0.0826 |
| PPP1R7     | 1.0963 | 1.5750 | 0.8196 | 0.6570 | 1.0370 | 0.2010 |
| CXYorf2    | 0.9639 | 1.0160 | 1.2193 | 0.9487 | 1.0370 | 0.0625 |
| FLJ46156   | 0.8970 | 1.1891 | 1.0550 | 1.0068 | 1.0370 | 0.0605 |
| DCAF10     | 1.0533 | 1.2277 | 1.0639 | 0.8031 | 1.0370 | 0.0876 |
| DNAI2      | 0.9461 | 1.2011 | 1.0778 | 0.9230 | 1.0370 | 0.0645 |
| LOC728741  | 0.9848 | 1.1755 | 1.0138 | 0.9740 | 1.0370 | 0.0469 |
| CCDC64     | 1.0496 | 1.0155 | 1.1016 | 0.9812 | 1.0370 | 0.0257 |
| KISS1      | 0.9914 | 1.1055 | 1.0857 | 0.9655 | 1.0370 | 0.0345 |
| HLA-A      | 1.0465 | 1.2966 | 1.0624 | 0.7427 | 1.0371 | 0.1135 |
| LOC1001293 | 1.0979 | 1.0568 | 1.0736 | 0.9200 | 1.0371 | 0.0399 |
| LRRC10     | 0.8944 | 1.1839 | 1.1507 | 0.9192 | 1.0371 | 0.0757 |
| LOC652242  | 1.0948 | 1.1299 | 1.0330 | 0.8906 | 1.0371 | 0.0528 |
| LOC646431  | 0.8886 | 1.1001 | 1.3282 | 0.8314 | 1.0371 | 0.1129 |
| ADRA2B     | 0.8895 | 1.2583 | 1.0539 | 0.9467 | 1.0371 | 0.0812 |
| GLB1       | 0.9253 | 1.4037 | 0.9981 | 0.8214 | 1.0371 | 0.1275 |
| OR4C45     | 0.9289 | 1.2243 | 0.9950 | 1.0003 | 1.0371 | 0.0645 |
| VSIG8      | 0.9395 | 1.0745 | 1.0631 | 1.0714 | 1.0371 | 0.0326 |
| BTBD16     | 0.9989 | 1.0499 | 1.1034 | 0.9963 | 1.0371 | 0.0253 |
| TBX21      | 0.9120 | 1.4212 | 0.9605 | 0.8551 | 1.0372 | 0.1298 |
| MIR10B     | 1.0229 | 0.9689 | 1.1782 | 0.9786 | 1.0372 | 0.0485 |
| FLJ44313   | 1.0386 | 1.1699 | 1.0222 | 0.9181 | 1.0372 | 0.0517 |
| RPS27A     | 0.9717 | 1.1960 | 1.1207 | 0.8606 | 1.0372 | 0.0751 |
| ODZ3       | 1.0423 | 1.0361 | 1.0294 | 1.0413 | 1.0373 | 0.0030 |
| LRRC57     | 1.1567 | 1.2026 | 1.0116 | 0.7782 | 1.0373 | 0.0955 |
| DYNLRB1    | 0.8941 | 1.3552 | 1.1589 | 0.7409 | 1.0373 | 0.1367 |
| OR5P2      | 1.0516 | 1.0781 | 1.1558 | 0.8636 | 1.0373 | 0.0620 |
| FLJ46363   | 0.8970 | 1.1140 | 1.1516 | 0.9865 | 1.0373 | 0.0586 |

|            |        |        |        |        |        |        |
|------------|--------|--------|--------|--------|--------|--------|
| PPP1R13L   | 1.0570 | 1.2451 | 0.9849 | 0.8623 | 1.0373 | 0.0801 |
| ABHD4      | 1.0395 | 1.2618 | 0.9304 | 0.9176 | 1.0373 | 0.0797 |
| LOC651055  | 1.0150 | 1.1972 | 1.0191 | 0.9181 | 1.0373 | 0.0582 |
| TMEM8B     | 0.9717 | 1.3882 | 1.0054 | 0.7840 | 1.0373 | 0.1267 |
| CCL18      | 0.9929 | 1.1255 | 1.0678 | 0.9631 | 1.0373 | 0.0367 |
| MIR190B    | 1.0645 | 1.0621 | 1.0931 | 0.9298 | 1.0374 | 0.0365 |
| FLJ46284   | 1.0128 | 1.1654 | 0.9776 | 0.9939 | 1.0374 | 0.0433 |
| LOC653125  | 1.0048 | 1.1859 | 0.9593 | 0.9995 | 1.0374 | 0.0505 |
| LOC1001316 | 0.9677 | 1.1926 | 1.0130 | 0.9763 | 1.0374 | 0.0527 |
| LOC647540  | 1.0568 | 1.1390 | 1.1387 | 0.8151 | 1.0374 | 0.0766 |
| LOC644681  | 0.9336 | 1.1272 | 1.0694 | 1.0195 | 1.0374 | 0.0410 |
| LOC646079  | 0.9855 | 1.1734 | 1.1056 | 0.8852 | 1.0374 | 0.0639 |
| LRRC26     | 0.8735 | 1.6683 | 0.9092 | 0.6988 | 1.0374 | 0.2152 |
| CCNL2      | 0.8919 | 1.3593 | 1.0172 | 0.8815 | 1.0374 | 0.1116 |
| LOC651175  | 0.9618 | 1.0254 | 1.1919 | 0.9708 | 1.0375 | 0.0534 |
| SNORD111B  | 0.9878 | 1.1192 | 1.1142 | 0.9285 | 1.0375 | 0.0473 |
| MIR335     | 0.9157 | 1.2235 | 0.9903 | 1.0203 | 1.0375 | 0.0658 |
| ETNK2      | 1.0844 | 1.1101 | 1.0110 | 0.9443 | 1.0375 | 0.0375 |
| ERCC-00138 | 0.9942 | 1.0754 | 1.0942 | 0.9862 | 1.0375 | 0.0276 |
| LOC729130  | 0.9957 | 1.1917 | 1.0426 | 0.9200 | 1.0375 | 0.0573 |
| WDR91      | 0.9269 | 1.3480 | 1.0561 | 0.8189 | 1.0375 | 0.1143 |
| SCT        | 0.9862 | 1.2517 | 1.0129 | 0.8992 | 1.0375 | 0.0754 |
| SETX       | 0.8740 | 1.2230 | 1.0567 | 0.9964 | 1.0375 | 0.0726 |
| MIR422A    | 0.9334 | 1.1504 | 1.0372 | 1.0291 | 1.0375 | 0.0444 |
| RRP7B      | 0.9408 | 1.3532 | 1.0796 | 0.7765 | 1.0375 | 0.1221 |
| MTCH2      | 0.8662 | 1.5642 | 1.0087 | 0.7112 | 1.0375 | 0.1858 |
| DGKD       | 1.1073 | 1.1350 | 1.0282 | 0.8797 | 1.0375 | 0.0573 |
| LOC729574  | 1.0757 | 1.1244 | 1.0366 | 0.9135 | 1.0376 | 0.0451 |
| LOC645174  | 0.9700 | 1.2221 | 1.1511 | 0.8070 | 1.0376 | 0.0934 |
| RNU4ATAC   | 0.5868 | 1.3879 | 1.3648 | 0.8108 | 1.0376 | 0.2009 |
| SPERT      | 1.0213 | 1.1470 | 0.9446 | 1.0374 | 1.0376 | 0.0417 |
| ZNF224     | 1.0846 | 1.1046 | 1.0806 | 0.8806 | 1.0376 | 0.0526 |
| CLEC4E     | 0.9421 | 1.0804 | 1.1677 | 0.9602 | 1.0376 | 0.0531 |
| GPC6       | 0.8081 | 1.3286 | 1.0122 | 1.0016 | 1.0376 | 0.1077 |
| LOC645534  | 0.9939 | 1.0577 | 1.1114 | 0.9877 | 1.0377 | 0.0292 |
| LOC642636  | 0.9599 | 1.1176 | 1.0409 | 1.0325 | 1.0377 | 0.0322 |
| LOC647656  | 0.8761 | 1.2977 | 1.0581 | 0.9190 | 1.0377 | 0.0950 |
| LOC1001309 | 0.9492 | 1.1397 | 1.1338 | 0.9285 | 1.0378 | 0.0573 |
| LOC649942  | 0.9414 | 1.1397 | 1.0705 | 0.9998 | 1.0378 | 0.0430 |
| OR5B2      | 1.0062 | 1.2325 | 0.9910 | 0.9217 | 1.0379 | 0.0674 |
| WBSCR23    | 1.0987 | 1.0628 | 1.1258 | 0.8641 | 1.0379 | 0.0593 |
| LOC643930  | 1.0147 | 1.1733 | 1.0662 | 0.8973 | 1.0379 | 0.0573 |
| LOC158345  | 0.7171 | 1.6889 | 1.1025 | 0.6430 | 1.0379 | 0.2392 |
| LOC729301  | 0.9539 | 1.2712 | 1.1510 | 0.7756 | 1.0379 | 0.1092 |
| BET1L      | 1.1702 | 1.2333 | 0.9344 | 0.8140 | 1.0380 | 0.0985 |
| METTL7A    | 0.8534 | 1.2516 | 1.3066 | 0.7402 | 1.0380 | 0.1416 |

|            |        |        |        |        |        |        |
|------------|--------|--------|--------|--------|--------|--------|
| MEGF9      | 0.9830 | 1.2395 | 1.0011 | 0.9283 | 1.0380 | 0.0689 |
| CDH2       | 1.0323 | 1.0435 | 0.9881 | 1.0881 | 1.0380 | 0.0205 |
| C1QB       | 1.0155 | 1.0754 | 1.0325 | 1.0286 | 1.0380 | 0.0130 |
| OTUD7B     | 0.9993 | 1.1898 | 1.0704 | 0.8926 | 1.0380 | 0.0624 |
| LOC643790  | 0.7264 | 1.5659 | 1.0416 | 0.8183 | 1.0381 | 0.1880 |
| FAM32A     | 1.0702 | 1.5127 | 0.8486 | 0.7206 | 1.0381 | 0.1739 |
| LOC727768  | 1.1433 | 1.1942 | 0.9036 | 0.9112 | 1.0381 | 0.0762 |
| LOC388514  | 1.0314 | 1.1000 | 1.1092 | 0.9117 | 1.0381 | 0.0455 |
| LOC642359  | 0.9515 | 1.0421 | 1.1677 | 0.9911 | 1.0381 | 0.0470 |
| BCL7A      | 0.9889 | 1.1334 | 1.0517 | 0.9783 | 1.0381 | 0.0357 |
| LOC645262  | 0.9637 | 1.1334 | 1.0746 | 0.9807 | 1.0381 | 0.0400 |
| LOC1001326 | 0.9133 | 1.1646 | 1.0909 | 0.9837 | 1.0381 | 0.0558 |
| LOC648796  | 1.1084 | 0.9730 | 1.0362 | 1.0349 | 1.0381 | 0.0277 |
| MIAT       | 0.9234 | 1.2196 | 1.0557 | 0.9538 | 1.0381 | 0.0668 |
| LOC646294  | 0.9858 | 1.2711 | 1.1023 | 0.7933 | 1.0381 | 0.1004 |
| TTC5       | 0.9951 | 1.4490 | 0.9234 | 0.7853 | 1.0382 | 0.1437 |
| TP53I3     | 0.8994 | 1.2289 | 1.1063 | 0.9182 | 1.0382 | 0.0789 |
| DNAJC4     | 1.0282 | 1.5048 | 0.8725 | 0.7474 | 1.0382 | 0.1658 |
| LOC390551  | 0.9153 | 1.1315 | 1.1259 | 0.9802 | 1.0382 | 0.0539 |
| LOC729023  | 1.0636 | 0.9871 | 1.1520 | 0.9502 | 1.0382 | 0.0447 |
| PCDHB10    | 1.0027 | 1.1403 | 1.1060 | 0.9041 | 1.0383 | 0.0534 |
| FAM177A1   | 0.9128 | 1.4956 | 1.0481 | 0.6966 | 1.0383 | 0.1688 |
| IP6K2      | 0.9033 | 1.5660 | 0.9449 | 0.7390 | 1.0383 | 0.1814 |
| LOC147645  | 1.0485 | 1.2462 | 0.9102 | 0.9483 | 1.0383 | 0.0752 |
| LOC1001317 | 0.8586 | 1.2448 | 1.0567 | 0.9932 | 1.0383 | 0.0803 |
| TLL1       | 0.9378 | 1.0803 | 1.3447 | 0.7906 | 1.0383 | 0.1180 |
| TYRO3P     | 1.0322 | 1.1240 | 1.0943 | 0.9029 | 1.0384 | 0.0490 |
| LOC650634  | 0.9260 | 1.0954 | 1.0122 | 1.1201 | 1.0384 | 0.0440 |
| LOC647886  | 0.9609 | 1.1557 | 1.1152 | 0.9219 | 1.0384 | 0.0572 |
| LOC647096  | 0.9272 | 1.1470 | 1.2132 | 0.8663 | 1.0384 | 0.0838 |
| ALAS1      | 0.9701 | 1.1617 | 1.0890 | 0.9330 | 1.0384 | 0.0529 |
| SCGB3A2    | 1.0368 | 1.0333 | 1.0585 | 1.0252 | 1.0385 | 0.0071 |
| TRIM2      | 1.0448 | 1.1027 | 1.0714 | 0.9351 | 1.0385 | 0.0364 |
| LOC642149  | 0.9927 | 1.1223 | 1.0833 | 0.9557 | 1.0385 | 0.0387 |
| PRR12      | 1.1102 | 1.0880 | 1.0166 | 0.9392 | 1.0385 | 0.0387 |
| CCDC33     | 0.9250 | 1.2299 | 1.0152 | 0.9840 | 1.0385 | 0.0665 |
| LOC649659  | 0.8878 | 1.3080 | 1.0450 | 0.9132 | 1.0385 | 0.0962 |
| TFAMP1     | 1.0351 | 1.1718 | 1.0223 | 0.9249 | 1.0385 | 0.0508 |
| KRTAP24-1  | 0.9249 | 1.2157 | 1.1327 | 0.8809 | 1.0385 | 0.0806 |
| OR4F29     | 0.9697 | 1.2378 | 1.0446 | 0.9020 | 1.0385 | 0.0725 |
| CLEC12B    | 1.0392 | 1.1317 | 0.9683 | 1.0151 | 1.0385 | 0.0344 |
| RNU1G2     | 0.9738 | 1.1394 | 1.1665 | 0.8746 | 1.0385 | 0.0693 |
| DCAF6      | 0.9777 | 1.3072 | 1.0658 | 0.8035 | 1.0386 | 0.1048 |
| LOC1001330 | 0.9945 | 1.1498 | 1.0743 | 0.9358 | 1.0386 | 0.0467 |
| MIR1308    | 1.0382 | 1.1726 | 1.0457 | 0.8979 | 1.0386 | 0.0561 |
| HIST2H2AB  | 1.1743 | 1.0961 | 1.0972 | 0.7869 | 1.0386 | 0.0859 |

|            |        |        |        |        |        |        |
|------------|--------|--------|--------|--------|--------|--------|
| FICD       | 0.9913 | 1.3139 | 0.9922 | 0.8571 | 1.0386 | 0.0971 |
| LOC643330  | 1.0127 | 1.1968 | 1.0386 | 0.9064 | 1.0386 | 0.0600 |
| PDS5B      | 0.9315 | 1.4251 | 1.0407 | 0.7573 | 1.0386 | 0.1414 |
| LOC1001312 | 0.9858 | 1.0895 | 1.0943 | 0.9850 | 1.0387 | 0.0308 |
| SCRN2      | 1.0527 | 1.1247 | 1.0539 | 0.9233 | 1.0387 | 0.0420 |
| FLJ32955   | 1.0973 | 1.0791 | 1.0238 | 0.9545 | 1.0387 | 0.0321 |
| TNFAIP8    | 0.9786 | 1.3598 | 0.9871 | 0.8294 | 1.0387 | 0.1130 |
| LOC1001301 | 1.1142 | 1.0809 | 1.1085 | 0.8512 | 1.0387 | 0.0629 |
| LOC374395  | 0.9047 | 1.4052 | 1.1906 | 0.6543 | 1.0387 | 0.1641 |
| PPAPDC1B   | 0.7475 | 1.4703 | 1.1952 | 0.7419 | 1.0387 | 0.1788 |
| LOC651721  | 0.9248 | 1.1462 | 1.2375 | 0.8464 | 1.0387 | 0.0917 |
| TTC7A      | 1.1585 | 1.1102 | 1.0083 | 0.8780 | 1.0387 | 0.0621 |
| SCN8A      | 0.9805 | 1.2192 | 0.9566 | 0.9988 | 1.0388 | 0.0608 |
| SNIP       | 0.9792 | 1.1552 | 1.0458 | 0.9750 | 1.0388 | 0.0421 |
| ACOX3      | 0.8104 | 1.3923 | 1.0912 | 0.8612 | 1.0388 | 0.1327 |
| C5orf27    | 0.9185 | 1.3026 | 1.0489 | 0.8851 | 1.0388 | 0.0948 |
| CCL13      | 0.9833 | 1.1388 | 1.1403 | 0.8928 | 1.0388 | 0.0610 |
| XPO5       | 0.8886 | 1.4229 | 1.0268 | 0.8169 | 1.0388 | 0.1352 |
| LOC642337  | 0.9628 | 1.1705 | 1.0788 | 0.9430 | 1.0388 | 0.0531 |
| FAM129B    | 0.9208 | 1.5524 | 0.9793 | 0.7026 | 1.0388 | 0.1813 |
| MIR1289-2  | 0.9925 | 1.1241 | 1.0202 | 1.0184 | 1.0388 | 0.0291 |
| LOC646400  | 0.9916 | 1.0816 | 1.1390 | 0.9431 | 1.0388 | 0.0440 |
| RNU1-3     | 0.9101 | 1.2280 | 1.1000 | 0.9172 | 1.0388 | 0.0768 |
| LOC643772  | 0.9772 | 1.1249 | 1.1077 | 0.9456 | 1.0389 | 0.0453 |
| GSK3A      | 0.9304 | 1.2009 | 1.1112 | 0.9129 | 1.0389 | 0.0702 |
| LOC1001306 | 0.9784 | 1.1641 | 1.0159 | 0.9971 | 1.0389 | 0.0424 |
| LOC648057  | 1.0236 | 1.0912 | 1.1440 | 0.8966 | 1.0389 | 0.0534 |
| LOC650468  | 0.9501 | 1.0786 | 1.1831 | 0.9437 | 1.0389 | 0.0572 |
| FLJ43987   | 1.1251 | 1.1311 | 1.0217 | 0.8777 | 1.0389 | 0.0593 |
| AKR1B10    | 1.0194 | 1.0384 | 1.1372 | 0.9607 | 1.0389 | 0.0367 |
| LOC642282  | 1.0334 | 1.1148 | 1.0987 | 0.9090 | 1.0390 | 0.0468 |
| LOC653182  | 1.0352 | 1.1809 | 1.0284 | 0.9114 | 1.0390 | 0.0552 |
| LIPI       | 1.0288 | 1.0945 | 0.9945 | 1.0381 | 1.0390 | 0.0207 |
| ID4        | 0.9348 | 1.1193 | 1.1233 | 0.9786 | 1.0390 | 0.0484 |
| CYB561     | 0.9608 | 1.4742 | 0.9732 | 0.7479 | 1.0390 | 0.1540 |
| CASK       | 0.8022 | 1.5058 | 0.9561 | 0.8919 | 1.0390 | 0.1588 |
| LOC652753  | 1.0411 | 1.0484 | 1.1678 | 0.8987 | 1.0390 | 0.0550 |
| LOC1001336 | 0.8726 | 1.2567 | 1.0749 | 0.9519 | 1.0390 | 0.0837 |
| MIR33A     | 1.0529 | 1.0307 | 1.1115 | 0.9611 | 1.0390 | 0.0311 |
| LOC643143  | 1.0198 | 1.1549 | 1.0170 | 0.9646 | 1.0391 | 0.0407 |
| LOC645645  | 1.0053 | 1.0722 | 1.1345 | 0.9444 | 1.0391 | 0.0411 |
| OR6C2      | 1.0468 | 1.1315 | 1.0830 | 0.8952 | 1.0391 | 0.0510 |
| CYP8B1     | 1.0977 | 1.0807 | 0.9745 | 1.0036 | 1.0391 | 0.0297 |
| DGAT2L3    | 0.9602 | 1.1124 | 1.0567 | 1.0273 | 1.0391 | 0.0317 |
| ST6GALNAC3 | 0.9984 | 1.0349 | 1.1143 | 1.0091 | 1.0392 | 0.0262 |
| EXT1       | 1.0647 | 1.2091 | 0.9899 | 0.8931 | 1.0392 | 0.0666 |

|            |        |        |        |        |        |        |
|------------|--------|--------|--------|--------|--------|--------|
| LOC650061  | 1.1036 | 1.0844 | 0.9793 | 0.9896 | 1.0392 | 0.0319 |
| LOC642228  | 1.0381 | 1.1098 | 1.0368 | 0.9722 | 1.0392 | 0.0281 |
| LOC646376  | 0.8863 | 1.0409 | 1.2244 | 1.0053 | 1.0392 | 0.0700 |
| LYVE1      | 0.9789 | 1.1543 | 1.0866 | 0.9373 | 1.0392 | 0.0496 |
| C15orf26   | 0.8915 | 1.1112 | 1.1053 | 1.0491 | 1.0392 | 0.0512 |
| MIR589     | 0.9413 | 1.1278 | 1.0386 | 1.0493 | 1.0393 | 0.0382 |
| NUP93      | 0.8811 | 1.5905 | 0.9989 | 0.6865 | 1.0393 | 0.1947 |
| ANTXR2     | 0.8437 | 1.2760 | 1.1155 | 0.9219 | 1.0393 | 0.0974 |
| LOC728887  | 1.0960 | 1.0014 | 1.0966 | 0.9632 | 1.0393 | 0.0338 |
| LOC400890  | 0.9811 | 1.5282 | 0.9462 | 0.7019 | 1.0393 | 0.1744 |
| ERCC-00117 | 0.9008 | 1.2131 | 1.0493 | 0.9941 | 1.0393 | 0.0655 |
| SERPINA7   | 0.9689 | 1.0991 | 1.1329 | 0.9565 | 1.0393 | 0.0449 |
| CSH2       | 0.9635 | 1.1534 | 1.1125 | 0.9280 | 1.0393 | 0.0552 |
| HDX        | 0.9509 | 1.2643 | 1.0147 | 0.9275 | 1.0393 | 0.0772 |
| ARHGEF17   | 0.9257 | 1.3650 | 0.9924 | 0.8744 | 1.0394 | 0.1112 |
| C22orf28   | 1.0161 | 1.4064 | 1.1408 | 0.5941 | 1.0394 | 0.1693 |
| LOC644625  | 0.8892 | 1.2548 | 1.0684 | 0.9455 | 1.0395 | 0.0809 |
| ERN2       | 0.7784 | 1.2531 | 1.1741 | 0.9524 | 1.0395 | 0.1078 |
| SGPP1      | 0.7726 | 1.5067 | 1.0799 | 0.7988 | 1.0395 | 0.1706 |
| GCNT7      | 0.9430 | 1.1909 | 1.0058 | 1.0183 | 1.0395 | 0.0531 |
| LOC1001317 | 1.0276 | 1.1707 | 1.0589 | 0.9008 | 1.0395 | 0.0555 |
| SVEP1      | 0.9482 | 1.1167 | 1.1095 | 0.9836 | 1.0395 | 0.0431 |
| NMUR2      | 1.0306 | 1.0939 | 1.1375 | 0.8962 | 1.0395 | 0.0526 |
| PCDHGB6    | 1.0091 | 1.2211 | 1.0264 | 0.9016 | 1.0396 | 0.0665 |
| ZFHX2      | 0.8700 | 1.1297 | 1.1231 | 1.0355 | 1.0396 | 0.0605 |
| LOC1001315 | 0.9796 | 1.1790 | 1.0354 | 0.9645 | 1.0396 | 0.0489 |
| MYRIP      | 1.0840 | 1.1806 | 1.0796 | 0.8143 | 1.0396 | 0.0786 |
| LOC1001291 | 0.9721 | 1.0791 | 1.0976 | 1.0097 | 1.0396 | 0.0294 |
| DEFA1      | 0.9141 | 1.3638 | 0.9924 | 0.8883 | 1.0396 | 0.1103 |
| LCE2D      | 0.8370 | 1.2319 | 1.1194 | 0.9703 | 1.0397 | 0.0862 |
| LOC1001332 | 1.0049 | 1.0959 | 1.0422 | 1.0157 | 1.0397 | 0.0203 |
| LOC1001303 | 1.0840 | 1.1019 | 1.0542 | 0.9186 | 1.0397 | 0.0415 |
| PLCD1      | 0.9197 | 1.3046 | 1.0003 | 0.9342 | 1.0397 | 0.0900 |
| OR4E2      | 0.9615 | 1.1338 | 1.0066 | 1.0568 | 1.0397 | 0.0369 |
| LOC1001328 | 1.0472 | 1.1222 | 1.0236 | 0.9658 | 1.0397 | 0.0324 |
| ENPP3      | 1.0135 | 1.1149 | 1.0718 | 0.9586 | 1.0397 | 0.0341 |
| SNORD48    | 0.7584 | 1.1914 | 1.3267 | 0.8824 | 1.0397 | 0.1320 |
| WWC2       | 0.9428 | 1.1599 | 1.0786 | 0.9778 | 1.0398 | 0.0493 |
| LOC388333  | 0.9080 | 1.0949 | 1.1260 | 1.0303 | 1.0398 | 0.0482 |
| LOC647485  | 0.9253 | 1.1796 | 1.1372 | 0.9171 | 1.0398 | 0.0690 |
| MIR708     | 1.0351 | 1.1431 | 1.1409 | 0.8402 | 1.0398 | 0.0712 |
| MIP        | 1.0283 | 1.1692 | 1.0117 | 0.9501 | 1.0398 | 0.0463 |
| LOC1001343 | 1.0140 | 1.1635 | 1.1681 | 0.8137 | 1.0398 | 0.0834 |
| CUX2       | 1.0642 | 1.1685 | 1.0621 | 0.8648 | 1.0399 | 0.0634 |
| P2RXL1     | 1.0785 | 1.0806 | 1.1034 | 0.8971 | 1.0399 | 0.0479 |
| LOC728510  | 1.1202 | 1.1560 | 0.9933 | 0.8903 | 1.0399 | 0.0609 |

|            |        |        |        |        |        |        |
|------------|--------|--------|--------|--------|--------|--------|
| XAB2       | 0.9128 | 1.4192 | 1.1761 | 0.6516 | 1.0399 | 0.1657 |
| KRTAP6-1   | 0.9581 | 1.1046 | 1.1935 | 0.9036 | 1.0399 | 0.0665 |
| APBB1IP    | 0.9705 | 1.1872 | 1.0575 | 0.9446 | 1.0399 | 0.0547 |
| LOC1001279 | 1.1638 | 1.0901 | 1.0299 | 0.8760 | 1.0400 | 0.0611 |
| LIMK2      | 0.9840 | 1.2124 | 1.1109 | 0.8525 | 1.0400 | 0.0780 |
| LOC1001323 | 0.9350 | 1.2030 | 0.9798 | 1.0421 | 1.0400 | 0.0586 |
| KRTAP5-5   | 0.9906 | 1.1886 | 1.0227 | 0.9582 | 1.0400 | 0.0513 |
| LOC1001291 | 0.9605 | 1.1491 | 1.1550 | 0.8958 | 1.0401 | 0.0660 |
| C6orf224   | 1.1340 | 1.1217 | 1.0790 | 0.8256 | 1.0401 | 0.0725 |
| LUZP4      | 1.0431 | 1.1201 | 1.0153 | 0.9819 | 1.0401 | 0.0295 |
| LOC441868  | 0.8500 | 1.1650 | 1.1580 | 0.9873 | 1.0401 | 0.0755 |
| LOC646071  | 1.1256 | 1.1131 | 0.9587 | 0.9630 | 1.0401 | 0.0458 |
| TCEA2      | 0.9286 | 1.3762 | 1.0296 | 0.8259 | 1.0401 | 0.1195 |
| EPHA4      | 1.0899 | 1.1197 | 1.0427 | 0.9083 | 1.0401 | 0.0467 |
| NCKIPSD    | 0.9676 | 1.2505 | 1.1066 | 0.8359 | 1.0401 | 0.0893 |
| LOC643771  | 0.9763 | 1.2111 | 1.0394 | 0.9338 | 1.0402 | 0.0610 |
| MICAL2     | 0.9041 | 1.2872 | 1.0697 | 0.8998 | 1.0402 | 0.0913 |
| LOC643805  | 1.0611 | 1.1652 | 1.0711 | 0.8635 | 1.0402 | 0.0634 |
| LOC374920  | 0.9658 | 1.1464 | 1.0412 | 1.0076 | 1.0402 | 0.0386 |
| THSD4      | 1.0313 | 1.1824 | 1.0539 | 0.8936 | 1.0403 | 0.0592 |
| C3orf23    | 0.9207 | 1.4744 | 0.9693 | 0.7967 | 1.0403 | 0.1492 |
| SCN7A      | 1.0091 | 1.1531 | 1.0696 | 0.9294 | 1.0403 | 0.0473 |
| PLEKHO2    | 1.0020 | 1.2709 | 1.0305 | 0.8578 | 1.0403 | 0.0857 |
| COMMD7     | 0.8858 | 1.5907 | 0.9439 | 0.7408 | 1.0403 | 0.1884 |
| LOC440027  | 0.9678 | 1.1097 | 1.1047 | 0.9791 | 1.0403 | 0.0387 |
| MIR519D    | 1.0213 | 1.1266 | 1.0278 | 0.9856 | 1.0403 | 0.0302 |
| KCNE1      | 0.9131 | 1.1740 | 1.1468 | 0.9274 | 1.0403 | 0.0696 |
| LOC254312  | 0.9572 | 1.0494 | 1.1912 | 0.9635 | 1.0403 | 0.0545 |
| TNNC1      | 0.9183 | 1.2425 | 1.0607 | 0.9398 | 1.0403 | 0.0743 |
| LOC642559  | 0.9983 | 1.0988 | 1.0528 | 1.0115 | 1.0403 | 0.0227 |
| C6orf190   | 1.0162 | 1.0794 | 1.1032 | 0.9627 | 1.0404 | 0.0317 |
| LOC1001334 | 0.9461 | 1.2741 | 1.0258 | 0.9156 | 1.0404 | 0.0813 |
| SUCNR1     | 0.9122 | 1.0839 | 1.1428 | 1.0227 | 1.0404 | 0.0493 |
| DGKK       | 1.0600 | 1.0149 | 1.0326 | 1.0542 | 1.0404 | 0.0104 |
| LOC641941  | 1.0183 | 1.0930 | 1.1577 | 0.8927 | 1.0405 | 0.0569 |
| ZDHHC18    | 0.8835 | 1.2637 | 1.0509 | 0.9639 | 1.0405 | 0.0819 |
| BTBD12     | 0.9423 | 1.5247 | 0.9690 | 0.7260 | 1.0405 | 0.1703 |
| C9orf7     | 1.0922 | 1.4089 | 0.8179 | 0.8430 | 1.0405 | 0.1375 |
| DGKA       | 1.0326 | 1.1829 | 1.0666 | 0.8800 | 1.0405 | 0.0624 |
| ZNF701     | 0.9672 | 1.2749 | 1.0752 | 0.8448 | 1.0405 | 0.0912 |
| LOC1001298 | 0.9453 | 1.1982 | 1.0755 | 0.9433 | 1.0406 | 0.0610 |
| LOC1001302 | 1.0113 | 1.2056 | 1.0142 | 0.9312 | 1.0406 | 0.0583 |
| ALDH3A2    | 1.0962 | 1.4547 | 0.8988 | 0.7125 | 1.0406 | 0.1587 |
| PEAR1      | 0.8828 | 1.1904 | 1.1315 | 0.9576 | 1.0406 | 0.0722 |
| SCD        | 0.9055 | 1.4139 | 1.1211 | 0.7218 | 1.0406 | 0.1488 |
| DPYD       | 1.0622 | 1.1355 | 1.0263 | 0.9383 | 1.0406 | 0.0410 |

|            |        |        |        |        |        |        |
|------------|--------|--------|--------|--------|--------|--------|
| DYNC1LI1   | 0.8992 | 1.1732 | 1.0848 | 1.0052 | 1.0406 | 0.0583 |
| VTI1A      | 1.1235 | 1.0649 | 0.9563 | 1.0177 | 1.0406 | 0.0355 |
| OR13C9     | 0.9627 | 1.1824 | 1.0865 | 0.9308 | 1.0406 | 0.0580 |
| PRAMEF19   | 1.0697 | 1.0536 | 1.0721 | 0.9671 | 1.0406 | 0.0248 |
| FAS        | 0.9986 | 1.2943 | 1.0482 | 0.8214 | 1.0406 | 0.0976 |
| OLAH       | 0.9885 | 1.1386 | 1.0299 | 1.0056 | 1.0406 | 0.0337 |
| C7orf16    | 0.9518 | 1.2433 | 0.9945 | 0.9731 | 1.0407 | 0.0681 |
| TNK2       | 1.0884 | 1.2926 | 0.9649 | 0.8169 | 1.0407 | 0.1007 |
| LOC650243  | 1.1280 | 1.0114 | 1.0248 | 0.9986 | 1.0407 | 0.0296 |
| LOC648454  | 0.9909 | 1.1147 | 1.0528 | 1.0046 | 1.0407 | 0.0280 |
| SCRT2      | 1.0485 | 1.1589 | 0.9926 | 0.9631 | 1.0408 | 0.0432 |
| RDH12      | 0.9084 | 1.2634 | 1.1203 | 0.8710 | 1.0408 | 0.0923 |
| ARAP1      | 1.0831 | 1.3314 | 0.8076 | 0.9409 | 1.0408 | 0.1120 |
| LOC442096  | 0.9934 | 1.2646 | 0.9917 | 0.9134 | 1.0408 | 0.0769 |
| U2AF1L2    | 0.9556 | 1.3194 | 1.1826 | 0.7056 | 1.0408 | 0.1346 |
| GRB10      | 1.0864 | 1.3501 | 0.9216 | 0.8051 | 1.0408 | 0.1181 |
| LOC648149  | 1.0334 | 1.1194 | 1.0299 | 0.9806 | 1.0408 | 0.0288 |
| TEKT5      | 1.0021 | 1.1297 | 1.0150 | 1.0165 | 1.0408 | 0.0298 |
| FAM134C    | 1.0313 | 1.2632 | 0.9966 | 0.8723 | 1.0408 | 0.0816 |
| LOC647103  | 1.0071 | 1.1097 | 1.0631 | 0.9834 | 1.0408 | 0.0284 |
| DGKE       | 0.9459 | 1.1302 | 1.1603 | 0.9270 | 1.0409 | 0.0607 |
| SLC6A2     | 1.0156 | 1.1505 | 1.0394 | 0.9580 | 1.0409 | 0.0403 |
| C9orf153   | 1.0603 | 1.0893 | 1.1074 | 0.9067 | 1.0409 | 0.0458 |
| TADA3      | 1.0275 | 1.3967 | 0.9935 | 0.7461 | 1.0409 | 0.1341 |
| LOC649360  | 0.9795 | 1.1843 | 1.0281 | 0.9718 | 1.0409 | 0.0494 |
| FLJ45244   | 1.0535 | 1.1285 | 1.1616 | 0.8202 | 1.0409 | 0.0770 |
| LOC1001327 | 0.8172 | 1.6907 | 0.9066 | 0.7494 | 1.0410 | 0.2189 |
| LOC727737  | 1.0279 | 1.2370 | 0.9099 | 0.9893 | 1.0410 | 0.0698 |
| TERC       | 0.9395 | 1.2322 | 1.0887 | 0.9038 | 1.0411 | 0.0753 |
| C19orf33   | 0.9431 | 1.3908 | 1.0345 | 0.7959 | 1.0411 | 0.1265 |
| LOC1001342 | 1.1168 | 1.1234 | 0.9829 | 0.9411 | 1.0411 | 0.0465 |
| UCKL10S    | 0.9544 | 1.1136 | 0.9923 | 1.1040 | 1.0411 | 0.0399 |
| LOC643722  | 0.9943 | 1.2582 | 1.0433 | 0.8686 | 1.0411 | 0.0812 |
| LOC1001290 | 1.0221 | 1.0635 | 1.1021 | 0.9769 | 1.0411 | 0.0269 |
| ARHGAP29   | 0.9483 | 1.1342 | 1.1190 | 0.9631 | 1.0411 | 0.0495 |
| PCGF3      | 1.0544 | 1.1226 | 1.1339 | 0.8539 | 1.0412 | 0.0649 |
| ANKRD33    | 0.7167 | 1.4566 | 1.1967 | 0.7947 | 1.0412 | 0.1739 |
| LOC654055  | 1.0974 | 1.1380 | 1.0520 | 0.8774 | 1.0412 | 0.0573 |
| LOC648147  | 0.8990 | 1.0317 | 1.0069 | 1.2274 | 1.0412 | 0.0684 |
| TMEM65     | 1.1001 | 0.9863 | 1.2452 | 0.8333 | 1.0412 | 0.0872 |
| CNGA2      | 0.9563 | 1.2433 | 0.9308 | 1.0346 | 1.0412 | 0.0709 |
| LOC653852  | 1.0015 | 1.1047 | 1.1779 | 0.8808 | 1.0412 | 0.0646 |
| PLCXD3     | 0.9521 | 1.2131 | 1.1391 | 0.8608 | 1.0413 | 0.0815 |
| LOC440487  | 0.9516 | 1.3728 | 1.0599 | 0.7808 | 1.0413 | 0.1246 |
| LOC1001284 | 0.9082 | 1.1678 | 1.1339 | 0.9553 | 1.0413 | 0.0643 |
| SGSM3      | 0.9474 | 1.4066 | 0.9498 | 0.8616 | 1.0413 | 0.1235 |

|            |        |        |        |        |        |        |
|------------|--------|--------|--------|--------|--------|--------|
| RAB17      | 0.9100 | 1.4306 | 1.0135 | 0.8112 | 1.0413 | 0.1362 |
| SAMD7      | 1.0020 | 1.3200 | 0.9122 | 0.9312 | 1.0413 | 0.0949 |
| AP3S2      | 0.9299 | 1.3610 | 1.0557 | 0.8187 | 1.0413 | 0.1170 |
| RPL4       | 0.8979 | 1.2974 | 1.1830 | 0.7871 | 1.0413 | 0.1193 |
| GYPB       | 0.9423 | 1.2693 | 0.9580 | 0.9958 | 1.0414 | 0.0768 |
| ZBTB10     | 0.7765 | 1.3785 | 1.2379 | 0.7726 | 1.0414 | 0.1567 |
| BLVRB      | 0.9062 | 1.3730 | 1.1046 | 0.7816 | 1.0414 | 0.1290 |
| C19orf66   | 1.0134 | 1.1444 | 1.0821 | 0.9256 | 1.0414 | 0.0469 |
| LOC651004  | 0.9566 | 1.1550 | 1.1190 | 0.9349 | 1.0414 | 0.0559 |
| BRWD2      | 1.1342 | 1.2177 | 1.0362 | 0.7774 | 1.0414 | 0.0955 |
| LOC391157  | 1.0744 | 1.1768 | 1.0657 | 0.8486 | 1.0414 | 0.0690 |
| IL17RC     | 1.1117 | 1.1611 | 1.0055 | 0.8873 | 1.0414 | 0.0608 |
| PI4KAP1    | 1.1888 | 1.2435 | 0.9364 | 0.7971 | 1.0414 | 0.1054 |
| LOC648262  | 0.9401 | 1.1229 | 1.0854 | 1.0174 | 1.0415 | 0.0402 |
| RGS7       | 1.0904 | 1.0561 | 1.1087 | 0.9107 | 1.0415 | 0.0449 |
| LOC1001279 | 0.9469 | 1.0951 | 1.1792 | 0.9447 | 1.0415 | 0.0578 |
| FTMT       | 1.2482 | 1.1888 | 0.8454 | 0.8836 | 1.0415 | 0.1032 |
| SFMBT2     | 0.9578 | 1.2295 | 1.0716 | 0.9071 | 1.0415 | 0.0715 |
| CALCR      | 1.0355 | 1.1514 | 1.0209 | 0.9584 | 1.0416 | 0.0402 |
| TPPP       | 0.9988 | 1.0970 | 1.1679 | 0.9025 | 1.0416 | 0.0579 |
| GADL1      | 0.9597 | 1.2134 | 1.0530 | 0.9402 | 1.0416 | 0.0623 |
| PSMA8      | 0.9791 | 1.1759 | 1.0812 | 0.9302 | 1.0416 | 0.0547 |
| GGT3P      | 0.9392 | 1.0526 | 1.1866 | 0.9879 | 1.0416 | 0.0536 |
| SLFNL1     | 1.0376 | 1.1273 | 1.0199 | 0.9817 | 1.0416 | 0.0308 |
| ITGAD      | 1.0118 | 1.0792 | 1.0531 | 1.0225 | 1.0417 | 0.0153 |
| LOC650354  | 0.9953 | 1.1333 | 1.1029 | 0.9352 | 1.0417 | 0.0462 |
| ARHGEF5    | 1.1452 | 1.3418 | 0.8841 | 0.7957 | 1.0417 | 0.1245 |
| LOC643770  | 0.9321 | 1.0743 | 1.0329 | 1.1275 | 1.0417 | 0.0413 |
| TP53TG5    | 1.0797 | 0.9939 | 1.0257 | 1.0684 | 1.0419 | 0.0198 |
| CGRRF1     | 0.7690 | 1.4461 | 1.1673 | 0.7854 | 1.0419 | 0.1631 |
| ZNF721     | 1.0394 | 1.3702 | 1.0692 | 0.6891 | 1.0420 | 0.1393 |
| GABRR2     | 0.9979 | 1.0401 | 1.0698 | 1.0602 | 1.0420 | 0.0160 |
| TLE6       | 1.0144 | 1.3304 | 0.9500 | 0.8733 | 1.0420 | 0.1004 |
| LOC257358  | 0.9309 | 1.1966 | 1.1116 | 0.9291 | 1.0420 | 0.0670 |
| LOC1001323 | 1.0343 | 1.0378 | 1.0119 | 1.0843 | 1.0421 | 0.0152 |
| LOC643837  | 1.0431 | 1.1094 | 1.1004 | 0.9155 | 1.0421 | 0.0447 |
| PLEKHM1    | 0.9915 | 1.2467 | 1.0220 | 0.9082 | 1.0421 | 0.0723 |
| LOC1001335 | 1.0275 | 1.0397 | 0.9829 | 1.1183 | 1.0421 | 0.0282 |
| LOC732206  | 0.9422 | 1.0844 | 0.9924 | 1.1494 | 1.0421 | 0.0463 |
| EPX        | 0.8834 | 1.2543 | 1.1089 | 0.9219 | 1.0421 | 0.0862 |
| SNORD43    | 0.8529 | 1.1137 | 1.0422 | 1.1597 | 1.0421 | 0.0675 |
| LOC1001308 | 0.9389 | 1.1018 | 1.1829 | 0.9450 | 1.0421 | 0.0602 |
| LOC728863  | 1.0244 | 1.1033 | 1.1140 | 0.9271 | 1.0422 | 0.0433 |
| ZFP91      | 0.9461 | 1.3438 | 1.0749 | 0.8040 | 1.0422 | 0.1148 |
| ZNF512B    | 1.0951 | 1.1700 | 1.0524 | 0.8513 | 1.0422 | 0.0681 |
| LILRA2     | 0.9970 | 1.1214 | 1.0245 | 1.0260 | 1.0422 | 0.0272 |



|            |        |        |        |        |        |        |
|------------|--------|--------|--------|--------|--------|--------|
| LOC643464  | 1.1089 | 1.1253 | 1.0851 | 0.8496 | 1.0422 | 0.0647 |
| DAPK3      | 0.9366 | 1.2404 | 1.0891 | 0.9028 | 1.0422 | 0.0775 |
| FLJ21687   | 0.9397 | 1.1334 | 1.1498 | 0.9461 | 1.0422 | 0.0575 |
| LOC732391  | 1.0168 | 1.1057 | 1.1007 | 0.9459 | 1.0423 | 0.0381 |
| CHMP1B     | 0.9488 | 1.3605 | 0.9779 | 0.8819 | 1.0423 | 0.1080 |
| ZNF440     | 1.0785 | 1.0807 | 1.0727 | 0.9374 | 1.0423 | 0.0350 |
| FLJ23754   | 0.9777 | 1.1570 | 1.1610 | 0.8736 | 1.0423 | 0.0706 |
| MST1       | 1.0792 | 1.3421 | 1.0142 | 0.7338 | 1.0423 | 0.1249 |
| KCTD8      | 1.0402 | 1.3105 | 0.9980 | 0.8209 | 1.0424 | 0.1012 |
| HIST1H3E   | 1.1613 | 1.0861 | 1.1051 | 0.8171 | 1.0424 | 0.0768 |
| RUNDC2C    | 1.1074 | 1.1400 | 1.0854 | 0.8368 | 1.0424 | 0.0694 |
| C21orf29   | 0.9668 | 1.1573 | 1.2141 | 0.8318 | 1.0425 | 0.0879 |
| KRTAP10-8  | 0.9493 | 1.1442 | 1.0250 | 1.0515 | 1.0425 | 0.0402 |
| LOC647647  | 0.9556 | 1.1179 | 1.1120 | 0.9846 | 1.0425 | 0.0423 |
| GNG11      | 0.9903 | 1.1759 | 1.0340 | 0.9700 | 1.0426 | 0.0464 |
| LCN1       | 1.0653 | 1.0599 | 1.1023 | 0.9428 | 1.0426 | 0.0346 |
| OSR2       | 0.7738 | 1.3857 | 1.1851 | 0.8257 | 1.0426 | 0.1464 |
| LOC441013  | 1.0690 | 1.1381 | 1.1090 | 0.8542 | 1.0426 | 0.0644 |
| TMEM178    | 1.0446 | 1.1822 | 1.0951 | 0.8487 | 1.0426 | 0.0706 |
| NEK8       | 0.9771 | 1.1601 | 1.1478 | 0.8858 | 1.0427 | 0.0669 |
| OR10X1     | 0.9629 | 1.1813 | 1.0817 | 0.9447 | 1.0427 | 0.0553 |
| MIR767     | 1.1232 | 1.0608 | 1.0270 | 0.9598 | 1.0427 | 0.0341 |
| SLC19A2    | 0.9042 | 1.4315 | 1.0222 | 0.8130 | 1.0427 | 0.1365 |
| UBC        | 0.9529 | 1.2316 | 1.1539 | 0.8324 | 1.0427 | 0.0914 |
| ZFP2       | 0.9767 | 1.2642 | 1.0224 | 0.9077 | 1.0428 | 0.0775 |
| LOC643338  | 1.0667 | 1.1203 | 1.0795 | 0.9045 | 1.0428 | 0.0475 |
| ZNF84      | 0.9836 | 1.2847 | 1.0317 | 0.8712 | 1.0428 | 0.0873 |
| FGF10      | 1.0106 | 1.0847 | 1.1085 | 0.9674 | 1.0428 | 0.0327 |
| WDR5B      | 1.0808 | 1.1318 | 1.1031 | 0.8556 | 1.0428 | 0.0633 |
| C10orf10   | 1.0591 | 1.2002 | 1.0447 | 0.8673 | 1.0428 | 0.0682 |
| ZNF182     | 0.9411 | 1.2913 | 1.0263 | 0.9130 | 1.0429 | 0.0862 |
| ABHD1      | 1.0598 | 1.2359 | 1.0555 | 0.8206 | 1.0429 | 0.0852 |
| DDX1       | 0.9058 | 1.5558 | 1.0263 | 0.6837 | 1.0429 | 0.1851 |
| TBC1D10B   | 1.0821 | 1.2746 | 1.0764 | 0.7387 | 1.0430 | 0.1114 |
| MME        | 0.9179 | 1.3518 | 1.1356 | 0.7666 | 1.0430 | 0.1278 |
| MGC34774   | 1.1294 | 1.1417 | 1.0426 | 0.8583 | 1.0430 | 0.0654 |
| FLJ36070   | 1.0439 | 0.9773 | 1.1646 | 0.9862 | 1.0430 | 0.0431 |
| LOC1001304 | 1.1153 | 1.1000 | 1.0157 | 0.9411 | 1.0430 | 0.0404 |
| LOC1001297 | 0.8468 | 1.1726 | 1.5208 | 0.6319 | 1.0430 | 0.1942 |
| SNORD74    | 0.8401 | 1.1915 | 1.3228 | 0.8179 | 1.0431 | 0.1265 |
| CNTN3      | 1.0373 | 1.1202 | 1.0183 | 0.9966 | 1.0431 | 0.0270 |
| FLJ41046   | 0.9165 | 1.2165 | 1.0706 | 0.9688 | 1.0431 | 0.0661 |
| COL1A2     | 0.9509 | 1.1567 | 1.0794 | 0.9855 | 1.0431 | 0.0466 |
| ERN1       | 1.1259 | 1.3859 | 0.8749 | 0.7859 | 1.0431 | 0.1350 |
| ZBTB47     | 0.9605 | 1.4248 | 0.9007 | 0.8865 | 1.0431 | 0.1282 |
| LOC1001339 | 0.9390 | 1.2916 | 1.0579 | 0.8842 | 1.0432 | 0.0904 |

|            |        |        |        |        |        |        |
|------------|--------|--------|--------|--------|--------|--------|
| RAB24      | 1.0191 | 1.3593 | 0.9330 | 0.8612 | 1.0432 | 0.1102 |
| SLC6A10P   | 1.2069 | 1.3935 | 0.8605 | 0.7118 | 1.0432 | 0.1562 |
| LOC645100  | 0.9521 | 1.3316 | 0.9454 | 0.9437 | 1.0432 | 0.0962 |
| DIO3OS     | 0.9380 | 1.1468 | 1.0640 | 1.0241 | 1.0432 | 0.0434 |
| GOLGA8A    | 0.9766 | 1.0666 | 1.1674 | 0.9624 | 1.0432 | 0.0474 |
| PRR15L     | 0.8863 | 1.3814 | 1.1315 | 0.7740 | 1.0433 | 0.1352 |
| DKFZp686O1 | 1.0298 | 1.1127 | 1.1072 | 0.9235 | 1.0433 | 0.0442 |
| RNF11      | 0.9360 | 1.4895 | 1.0810 | 0.6668 | 1.0433 | 0.1717 |
| LOC340511  | 1.0744 | 1.0644 | 1.1404 | 0.8941 | 1.0433 | 0.0525 |
| GIPC1      | 1.0133 | 1.3184 | 1.0610 | 0.7807 | 1.0434 | 0.1102 |
| BBS2       | 1.0432 | 1.4302 | 0.9956 | 0.7046 | 1.0434 | 0.1491 |
| STX16      | 0.8686 | 1.4971 | 1.0149 | 0.7931 | 1.0434 | 0.1581 |
| LOC729537  | 0.9636 | 1.1001 | 1.1221 | 0.9880 | 1.0434 | 0.0396 |
| ARL5C      | 0.9827 | 1.1640 | 0.9539 | 1.0735 | 1.0435 | 0.0476 |
| ZNF784     | 1.0567 | 1.4299 | 0.8545 | 0.8328 | 1.0435 | 0.1383 |
| MIR1827    | 1.0343 | 1.0654 | 1.1272 | 0.9471 | 1.0435 | 0.0375 |
| C14orf4    | 0.8847 | 1.3115 | 1.2410 | 0.7372 | 1.0436 | 0.1384 |
| SNORD119   | 1.0201 | 1.0705 | 1.0977 | 0.9861 | 1.0436 | 0.0250 |
| CYP27A1    | 0.8931 | 1.3174 | 1.1414 | 0.8226 | 1.0436 | 0.1140 |
| LOC440509  | 0.8830 | 1.1498 | 0.9656 | 1.1761 | 1.0436 | 0.0711 |
| SERGEF     | 0.8989 | 1.5044 | 0.9829 | 0.7883 | 1.0436 | 0.1587 |
| PSMB4      | 0.7913 | 1.5375 | 1.1568 | 0.6890 | 1.0437 | 0.1928 |
| PRR15      | 1.0376 | 1.1174 | 1.0511 | 0.9687 | 1.0437 | 0.0305 |
| HBG1       | 1.0061 | 1.1055 | 1.0743 | 0.9890 | 1.0437 | 0.0276 |
| LOC728607  | 1.0073 | 1.1594 | 1.1239 | 0.8844 | 1.0438 | 0.0623 |
| LOC643284  | 1.0221 | 1.2021 | 1.1539 | 0.7971 | 1.0438 | 0.0906 |
| AKR1B15    | 1.0144 | 1.2026 | 0.9643 | 0.9940 | 1.0438 | 0.0539 |
| NME3       | 0.9188 | 1.4456 | 1.1253 | 0.6856 | 1.0438 | 0.1612 |
| CDKL4      | 0.9654 | 1.2720 | 0.9387 | 0.9994 | 1.0439 | 0.0770 |
| LOC441031  | 0.9998 | 1.1260 | 1.0937 | 0.9561 | 1.0439 | 0.0397 |
| CHP2       | 1.0809 | 1.1537 | 1.0902 | 0.8507 | 1.0439 | 0.0664 |
| LOC1001347 | 1.0607 | 1.1230 | 1.1011 | 0.8908 | 1.0439 | 0.0526 |
| C14orf68   | 1.0393 | 1.0415 | 1.1284 | 0.9665 | 1.0439 | 0.0331 |
| PLCB3      | 1.0161 | 1.1067 | 1.1517 | 0.9012 | 1.0439 | 0.0553 |
| NMT2       | 0.9104 | 1.2318 | 1.2105 | 0.8230 | 1.0439 | 0.1039 |
| CAPN1      | 1.1102 | 1.2562 | 1.1713 | 0.6380 | 1.0439 | 0.1386 |
| NEURL      | 0.9459 | 1.2327 | 1.0608 | 0.9364 | 1.0439 | 0.0690 |
| C16orf63   | 0.9519 | 1.2750 | 1.2289 | 0.7200 | 1.0440 | 0.1294 |
| LOC641945  | 0.9521 | 1.1490 | 1.0500 | 1.0248 | 1.0440 | 0.0407 |
| LOC642892  | 0.9959 | 1.2210 | 1.1211 | 0.8381 | 1.0440 | 0.0827 |
| SNORD113-5 | 0.9673 | 1.1623 | 1.0256 | 1.0209 | 1.0440 | 0.0416 |
| LENEP      | 1.0556 | 1.1107 | 1.0668 | 0.9430 | 1.0440 | 0.0357 |
| AGAP8      | 1.0710 | 1.4314 | 0.8915 | 0.7821 | 1.0440 | 0.1422 |
| OSBPL10    | 1.0479 | 1.1414 | 1.1277 | 0.8596 | 1.0441 | 0.0649 |
| RASL12     | 1.0168 | 1.0644 | 1.1081 | 0.9874 | 1.0442 | 0.0265 |
| SLC6A16    | 1.0712 | 1.1341 | 1.0652 | 0.9062 | 1.0442 | 0.0486 |

|            |        |        |        |        |        |        |
|------------|--------|--------|--------|--------|--------|--------|
| AFTPH      | 0.9675 | 1.3308 | 1.0373 | 0.8412 | 1.0442 | 0.1038 |
| MIR99A     | 0.9916 | 1.0337 | 1.1533 | 0.9982 | 1.0442 | 0.0375 |
| C10orf55   | 0.8829 | 1.2256 | 1.1260 | 0.9423 | 1.0442 | 0.0796 |
| PROM2      | 1.0208 | 1.4650 | 0.9515 | 0.7396 | 1.0442 | 0.1525 |
| IFNGR2     | 1.1062 | 1.3371 | 1.0301 | 0.7035 | 1.0442 | 0.1310 |
| ABHD13     | 1.0372 | 1.1553 | 1.0450 | 0.9394 | 1.0442 | 0.0441 |
| WIPF2      | 0.9932 | 1.2555 | 0.9893 | 0.9390 | 1.0443 | 0.0715 |
| MS4A15     | 1.0210 | 1.0438 | 1.0849 | 1.0274 | 1.0443 | 0.0144 |
| LOC651842  | 0.9724 | 1.0399 | 1.1406 | 1.0243 | 1.0443 | 0.0352 |
| KIAA0922   | 1.1268 | 1.2812 | 0.9664 | 0.8030 | 1.0443 | 0.1030 |
| C6orf70    | 0.9403 | 1.4248 | 0.9494 | 0.8628 | 1.0443 | 0.1283 |
| MCTP1      | 0.9728 | 1.1912 | 1.1039 | 0.9094 | 1.0443 | 0.0635 |
| LOC653492  | 0.9654 | 1.1479 | 1.0987 | 0.9654 | 1.0444 | 0.0467 |
| CAMK2D     | 0.9682 | 1.2567 | 1.1091 | 0.8434 | 1.0444 | 0.0892 |
| LOC644828  | 1.0438 | 1.1177 | 1.1167 | 0.8996 | 1.0445 | 0.0513 |
| NR1H2      | 0.7197 | 1.5714 | 1.1172 | 0.7696 | 1.0445 | 0.1966 |
| LOC729273  | 1.1465 | 1.0925 | 0.9943 | 0.9446 | 1.0445 | 0.0458 |
| HES2       | 1.2750 | 1.1297 | 0.9507 | 0.8226 | 1.0445 | 0.0993 |
| TSGA10     | 0.9953 | 1.2098 | 1.0484 | 0.9245 | 1.0445 | 0.0607 |
| LOC651065  | 1.1082 | 1.0526 | 1.0230 | 0.9943 | 1.0445 | 0.0243 |
| LOC1001317 | 0.9152 | 1.2020 | 1.0713 | 0.9897 | 1.0445 | 0.0614 |
| C14orf82   | 0.8749 | 1.3051 | 1.1155 | 0.8827 | 1.0445 | 0.1033 |
| DDX26B     | 0.9584 | 1.2097 | 1.0674 | 0.9428 | 1.0446 | 0.0616 |
| NID1       | 0.9681 | 1.1618 | 1.1278 | 0.9206 | 1.0446 | 0.0591 |
| RHOB       | 0.9847 | 1.2129 | 1.3475 | 0.6334 | 1.0446 | 0.1562 |
| LRRC37A    | 1.0163 | 1.1246 | 1.2154 | 0.8223 | 1.0446 | 0.0846 |
| CCL5       | 0.9693 | 1.1738 | 1.1875 | 0.8481 | 1.0447 | 0.0824 |
| SYT11      | 0.8811 | 1.2318 | 1.0826 | 0.9832 | 1.0447 | 0.0747 |
| RERG       | 1.0737 | 1.1475 | 1.0040 | 0.9536 | 1.0447 | 0.0422 |
| ENTPD6     | 1.1645 | 1.3388 | 0.8737 | 0.8019 | 1.0447 | 0.1255 |
| SIX1       | 0.8788 | 1.2228 | 1.1840 | 0.8934 | 1.0447 | 0.0920 |
| C4orf48    | 0.9439 | 1.3798 | 1.0059 | 0.8494 | 1.0447 | 0.1162 |
| PITPNM1    | 1.0421 | 1.3620 | 0.9965 | 0.7785 | 1.0448 | 0.1204 |
| FLJ33651   | 1.0145 | 1.0624 | 1.0836 | 1.0186 | 1.0448 | 0.0169 |
| GUSBL2     | 0.8677 | 1.4439 | 1.1177 | 0.7499 | 1.0448 | 0.1535 |
| LOC730241  | 0.9498 | 1.2128 | 0.9882 | 1.0285 | 1.0448 | 0.0583 |
| MAN1A1     | 0.9873 | 1.1408 | 1.2144 | 0.8369 | 1.0448 | 0.0839 |
| C10orf68   | 0.9349 | 1.2046 | 1.1592 | 0.8807 | 1.0449 | 0.0804 |
| C6orf141   | 1.0224 | 1.1016 | 1.0976 | 0.9579 | 1.0449 | 0.0342 |
| EPN2       | 1.0731 | 1.2349 | 0.9836 | 0.8879 | 1.0449 | 0.0738 |
| LOC642411  | 0.9371 | 1.2413 | 1.0396 | 0.9616 | 1.0449 | 0.0690 |
| LOC1001315 | 1.0298 | 1.2314 | 1.0861 | 0.8323 | 1.0449 | 0.0826 |
| IFNA10     | 1.0617 | 1.1251 | 1.0857 | 0.9072 | 1.0449 | 0.0477 |
| KIAA0652   | 1.1315 | 1.2473 | 0.9849 | 0.8161 | 1.0449 | 0.0933 |
| LOC1001320 | 0.9369 | 1.2366 | 1.2321 | 0.7742 | 1.0449 | 0.1143 |
| MTF1       | 1.0049 | 1.2270 | 0.9716 | 0.9764 | 1.0450 | 0.0611 |

|            |        |        |        |        |        |        |
|------------|--------|--------|--------|--------|--------|--------|
| LOC642167  | 0.9289 | 1.2732 | 1.0641 | 0.9138 | 1.0450 | 0.0832 |
| GMCL1L     | 0.9584 | 1.1812 | 1.0503 | 0.9902 | 1.0450 | 0.0492 |
| ZNF589     | 1.1073 | 1.2653 | 0.9992 | 0.8085 | 1.0451 | 0.0959 |
| FLJ12331   | 1.1020 | 1.1425 | 1.0385 | 0.8974 | 1.0451 | 0.0537 |
| NDUFB3     | 0.8996 | 1.4693 | 1.0414 | 0.7702 | 1.0451 | 0.1518 |
| INSL5      | 0.9972 | 1.2826 | 1.0921 | 0.8088 | 1.0451 | 0.0986 |
| EIF2C1     | 0.8788 | 1.4619 | 1.0286 | 0.8113 | 1.0452 | 0.1462 |
| LOC1001288 | 1.0890 | 1.1917 | 1.0647 | 0.8354 | 1.0452 | 0.0751 |
| LOC1001346 | 0.9426 | 1.2091 | 1.0432 | 0.9861 | 1.0452 | 0.0584 |
| FBRS       | 1.1133 | 1.3424 | 1.0076 | 0.7177 | 1.0453 | 0.1296 |
| SPRR1A     | 0.8044 | 1.4063 | 1.1018 | 0.8684 | 1.0453 | 0.1363 |
| OR7A17     | 0.8273 | 1.0701 | 1.2054 | 1.0784 | 1.0453 | 0.0790 |
| LOC648517  | 0.9961 | 1.2240 | 1.0280 | 0.9332 | 1.0453 | 0.0627 |
| LOC649700  | 1.0915 | 1.0974 | 1.0419 | 0.9504 | 1.0453 | 0.0340 |
| LOC1001344 | 0.9634 | 1.3061 | 1.0067 | 0.9052 | 1.0453 | 0.0894 |
| LOC646638  | 1.0077 | 1.1142 | 1.1114 | 0.9481 | 1.0453 | 0.0408 |
| CHMP2B     | 0.7987 | 1.3172 | 1.3464 | 0.7191 | 1.0454 | 0.1663 |
| ERCC-00081 | 0.9740 | 1.0404 | 1.1218 | 1.0453 | 1.0454 | 0.0302 |
| OPTN       | 0.9549 | 1.3579 | 1.1017 | 0.7672 | 1.0454 | 0.1246 |
| LOC728755  | 0.8425 | 1.5150 | 0.9549 | 0.8695 | 1.0454 | 0.1583 |
| NKIRAS2    | 1.0104 | 1.4304 | 0.9996 | 0.7414 | 1.0455 | 0.1426 |
| MIR1302-5  | 1.0226 | 1.2294 | 0.9460 | 0.9838 | 1.0455 | 0.0633 |
| POLK       | 0.9236 | 1.2272 | 1.0699 | 0.9613 | 1.0455 | 0.0681 |
| SORCS2     | 1.0431 | 1.0175 | 1.1361 | 0.9853 | 1.0455 | 0.0324 |
| LOC643391  | 1.0079 | 1.2158 | 1.0496 | 0.9086 | 1.0455 | 0.0640 |
| LOC649189  | 0.9784 | 1.1998 | 0.9377 | 1.0661 | 1.0455 | 0.0580 |
| DNALI1     | 1.0262 | 1.2593 | 1.0941 | 0.8026 | 1.0456 | 0.0946 |
| SLC1A2     | 1.0163 | 1.1333 | 1.0188 | 1.0139 | 1.0456 | 0.0293 |
| SPAG6      | 0.9817 | 1.1404 | 1.1099 | 0.9503 | 1.0456 | 0.0468 |
| RUNDC2A    | 0.9111 | 1.1139 | 1.1001 | 1.0575 | 1.0456 | 0.0464 |
| LOC392563  | 0.9743 | 1.2222 | 1.0036 | 0.9824 | 1.0456 | 0.0592 |
| COPG2      | 0.7817 | 1.5480 | 1.0779 | 0.7749 | 1.0456 | 0.1817 |
| LPPR3      | 1.0327 | 1.1950 | 1.0494 | 0.9054 | 1.0456 | 0.0593 |
| MIR92B     | 0.8785 | 1.2584 | 1.0214 | 1.0243 | 1.0457 | 0.0787 |
| MIR31      | 0.8935 | 1.2702 | 0.9837 | 1.0353 | 1.0457 | 0.0804 |
| OR8I2      | 0.9796 | 1.1970 | 1.0655 | 0.9407 | 1.0457 | 0.0568 |
| KCNV1      | 0.9659 | 1.2026 | 1.0783 | 0.9361 | 1.0457 | 0.0606 |
| LOC642233  | 0.9955 | 1.2641 | 1.0613 | 0.8621 | 1.0458 | 0.0838 |
| PTPN5      | 0.9501 | 1.1731 | 1.0768 | 0.9830 | 1.0458 | 0.0502 |
| FBXO18     | 0.9094 | 1.4267 | 1.0217 | 0.8252 | 1.0458 | 0.1332 |
| KIAA0460   | 1.0705 | 1.2540 | 0.9967 | 0.8619 | 1.0458 | 0.0817 |
| LOC651031  | 0.9133 | 1.1493 | 1.0983 | 1.0223 | 1.0458 | 0.0513 |
| REXO1L1    | 1.0506 | 1.0917 | 1.1263 | 0.9148 | 1.0458 | 0.0463 |
| LOC650114  | 0.9486 | 1.1794 | 1.0615 | 0.9940 | 1.0459 | 0.0502 |
| LOC1001303 | 0.8846 | 1.4188 | 1.1317 | 0.7485 | 1.0459 | 0.1475 |
| LOC653438  | 1.2289 | 1.2516 | 0.8969 | 0.8062 | 1.0459 | 0.1138 |

|            |        |        |        |        |        |        |
|------------|--------|--------|--------|--------|--------|--------|
| ABLIM3     | 1.0064 | 1.1366 | 1.0949 | 0.9459 | 1.0459 | 0.0430 |
| PGLYRP1    | 0.9955 | 1.0999 | 1.1262 | 0.9621 | 1.0459 | 0.0397 |
| H1FO       | 1.0416 | 1.2996 | 1.0295 | 0.8133 | 1.0460 | 0.0995 |
| ZNF479     | 0.9865 | 1.0221 | 1.1705 | 1.0049 | 1.0460 | 0.0421 |
| LOC1001317 | 0.9241 | 1.2627 | 1.0268 | 0.9704 | 1.0460 | 0.0752 |
| TXNRD1     | 0.7978 | 1.6878 | 0.9640 | 0.7346 | 1.0460 | 0.2193 |
| LOC284293  | 0.9963 | 1.1763 | 1.0479 | 0.9640 | 1.0461 | 0.0467 |
| OPN1MW2    | 0.9001 | 1.1436 | 1.1881 | 0.9528 | 1.0462 | 0.0705 |
| HERC1      | 0.9769 | 1.4396 | 0.9165 | 0.8516 | 1.0462 | 0.1336 |
| LOC728992  | 0.8541 | 1.3772 | 1.1142 | 0.8392 | 1.0462 | 0.1271 |
| PLUNC      | 0.9829 | 1.1526 | 1.0978 | 0.9514 | 1.0462 | 0.0474 |
| GUCY1B3    | 0.8395 | 1.3180 | 1.1308 | 0.8965 | 1.0462 | 0.1104 |
| LOC731477  | 0.9808 | 1.1763 | 1.0658 | 0.9620 | 1.0462 | 0.0489 |
| GUCY2D     | 0.9894 | 1.1758 | 1.0603 | 0.9595 | 1.0462 | 0.0481 |
| LOC730034  | 0.9020 | 1.1501 | 1.1324 | 1.0006 | 1.0463 | 0.0585 |
| LOC390811  | 0.9934 | 1.1125 | 1.0963 | 0.9831 | 1.0463 | 0.0338 |
| COG4       | 1.0221 | 1.4514 | 0.9681 | 0.7438 | 1.0463 | 0.1479 |
| LOC648359  | 1.0716 | 1.1267 | 1.0035 | 0.9834 | 1.0463 | 0.0328 |
| ACVR1C     | 1.0060 | 1.1272 | 1.0472 | 1.0052 | 1.0464 | 0.0287 |
| LOC728125  | 1.0652 | 1.0500 | 1.1207 | 0.9497 | 1.0464 | 0.0356 |
| LOC1001305 | 0.9238 | 1.1725 | 1.1176 | 0.9716 | 1.0464 | 0.0589 |
| FBXO32     | 0.9699 | 1.3841 | 1.0106 | 0.8211 | 1.0464 | 0.1197 |
| AMTN       | 1.0082 | 1.1339 | 1.1693 | 0.8746 | 1.0465 | 0.0669 |
| LOC642101  | 0.9618 | 1.1604 | 1.0405 | 1.0234 | 1.0465 | 0.0416 |
| EPSTI1     | 0.9696 | 1.2891 | 1.0179 | 0.9096 | 1.0466 | 0.0838 |
| C6orf72    | 0.9513 | 1.1476 | 1.3200 | 0.7674 | 1.0466 | 0.1197 |
| PANK3      | 0.9956 | 1.3595 | 1.0363 | 0.7950 | 1.0466 | 0.1169 |
| ZFYVE16    | 0.9861 | 1.2332 | 1.0755 | 0.8917 | 1.0466 | 0.0726 |
| BAGE5      | 0.9698 | 1.2272 | 1.0660 | 0.9235 | 1.0466 | 0.0671 |
| RFXDC2     | 0.9948 | 1.2339 | 1.0486 | 0.9093 | 1.0466 | 0.0687 |
| RAB40AL    | 1.0790 | 1.0844 | 1.0699 | 0.9534 | 1.0467 | 0.0312 |
| HRES1      | 1.0401 | 1.2356 | 1.0109 | 0.9002 | 1.0467 | 0.0698 |
| LOC401923  | 0.9324 | 1.0953 | 1.2110 | 0.9483 | 1.0467 | 0.0659 |
| PCDHB12    | 0.9709 | 1.1987 | 1.1137 | 0.9038 | 1.0468 | 0.0669 |
| HERC2      | 0.9415 | 1.4946 | 0.8525 | 0.8984 | 1.0468 | 0.1504 |
| CADM3      | 0.8964 | 1.1388 | 1.1422 | 1.0098 | 1.0468 | 0.0588 |
| TSPYL3     | 0.9269 | 1.1500 | 1.0824 | 1.0280 | 1.0468 | 0.0471 |
| CAMK1      | 1.0799 | 1.3186 | 1.0513 | 0.7377 | 1.0469 | 0.1192 |
| LOC1001341 | 1.0004 | 1.1046 | 1.1084 | 0.9741 | 1.0469 | 0.0349 |
| LOC440978  | 1.0120 | 1.1027 | 1.1195 | 0.9533 | 1.0469 | 0.0391 |
| LOC649181  | 1.0045 | 1.2130 | 1.0619 | 0.9083 | 1.0469 | 0.0638 |
| VIPR1      | 1.0625 | 1.3202 | 1.0491 | 0.7560 | 1.0470 | 0.1153 |
| ALMS1P     | 0.9621 | 1.1896 | 1.0382 | 0.9979 | 1.0470 | 0.0500 |
| KRTAP6-2   | 1.0350 | 1.1201 | 1.0495 | 0.9832 | 1.0470 | 0.0282 |
| SYTL3      | 0.9917 | 1.0542 | 1.2256 | 0.9164 | 1.0470 | 0.0659 |
| P4HA2      | 1.0106 | 1.4630 | 0.9530 | 0.7615 | 1.0470 | 0.1485 |

|            |        |        |        |        |        |        |
|------------|--------|--------|--------|--------|--------|--------|
| UGT1A1     | 1.0365 | 1.0852 | 1.1196 | 0.9467 | 1.0470 | 0.0375 |
| XIST       | 0.9091 | 1.3848 | 1.0206 | 0.8736 | 1.0470 | 0.1169 |
| LOC643007  | 1.3661 | 1.0118 | 1.0983 | 0.7120 | 1.0470 | 0.1348 |
| C18orf25   | 0.9811 | 1.2631 | 1.0113 | 0.9327 | 1.0470 | 0.0738 |
| TULP4      | 0.9636 | 1.4591 | 1.0124 | 0.7533 | 1.0471 | 0.1484 |
| DACT2      | 0.9976 | 1.0114 | 1.2370 | 0.9424 | 1.0471 | 0.0650 |
| C16orf5    | 0.9873 | 1.3186 | 0.9678 | 0.9147 | 1.0471 | 0.0918 |
| LOC1001304 | 1.0316 | 1.1880 | 1.0466 | 0.9223 | 1.0471 | 0.0545 |
| LOC1001324 | 0.9699 | 1.2025 | 1.0921 | 0.9240 | 1.0471 | 0.0628 |
| LOC652179  | 0.9775 | 1.3145 | 1.0546 | 0.8420 | 1.0471 | 0.0993 |
| LOC650293  | 1.1006 | 1.0979 | 1.0768 | 0.9133 | 1.0471 | 0.0449 |
| LOC730668  | 1.0061 | 1.1625 | 1.1068 | 0.9132 | 1.0472 | 0.0552 |
| LOC1001340 | 1.0313 | 1.1849 | 1.0731 | 0.8995 | 1.0472 | 0.0590 |
| LOC646003  | 0.9313 | 1.0477 | 1.1745 | 1.0356 | 1.0473 | 0.0498 |
| LOC650757  | 0.9713 | 1.2474 | 1.1042 | 0.8664 | 1.0473 | 0.0826 |
| GPBP1L1    | 1.0808 | 1.4461 | 0.9353 | 0.7273 | 1.0474 | 0.1514 |
| MIR761     | 0.9354 | 1.2101 | 1.1257 | 0.9183 | 1.0474 | 0.0718 |
| ATP6V1F    | 0.8579 | 1.4302 | 1.1552 | 0.7464 | 1.0474 | 0.1540 |
| LOC1001301 | 0.9375 | 1.1967 | 1.0759 | 0.9796 | 1.0474 | 0.0576 |
| AKIRIN2    | 0.8400 | 1.5520 | 1.1090 | 0.6888 | 1.0474 | 0.1893 |
| INO80D     | 0.9714 | 1.5833 | 0.8446 | 0.7906 | 1.0475 | 0.1826 |
| UBE2QP2    | 0.9956 | 1.1750 | 1.0998 | 0.9194 | 1.0475 | 0.0563 |
| LOC643598  | 1.0122 | 0.9856 | 1.1696 | 1.0225 | 1.0475 | 0.0414 |
| PART1      | 1.0582 | 1.2343 | 1.0200 | 0.8775 | 1.0475 | 0.0734 |
| LOC650584  | 0.9447 | 1.2289 | 0.9761 | 1.0404 | 1.0475 | 0.0637 |
| LOC652433  | 1.0229 | 1.2260 | 1.0067 | 0.9345 | 1.0475 | 0.0625 |
| LOC650491  | 1.1589 | 1.0955 | 1.0479 | 0.8879 | 1.0475 | 0.0579 |
| CXorf67    | 1.0260 | 1.0792 | 1.1009 | 0.9842 | 1.0475 | 0.0263 |
| LOC653920  | 1.0098 | 1.1964 | 1.0015 | 0.9825 | 1.0476 | 0.0500 |
| PLCH2      | 1.0264 | 1.2126 | 1.0532 | 0.8982 | 1.0476 | 0.0646 |
| RPL13      | 0.7806 | 1.5228 | 1.0936 | 0.7934 | 1.0476 | 0.1741 |
| LOC642097  | 1.0671 | 1.0261 | 1.1100 | 0.9873 | 1.0476 | 0.0264 |
| LRRC4      | 1.0822 | 1.1150 | 1.0837 | 0.9097 | 1.0477 | 0.0466 |
| GGNBP2     | 0.9289 | 1.6175 | 0.9786 | 0.6657 | 1.0477 | 0.2020 |
| KLHL24     | 0.9437 | 1.2701 | 1.1832 | 0.7937 | 1.0477 | 0.1092 |
| OSTM1      | 0.9827 | 1.2717 | 1.0783 | 0.8581 | 1.0477 | 0.0872 |
| TLE1       | 0.8930 | 1.3510 | 1.0102 | 0.9367 | 1.0477 | 0.1039 |
| SNAPC3     | 0.9986 | 1.4173 | 0.9877 | 0.7874 | 1.0477 | 0.1324 |
| MAP3K7     | 1.0136 | 1.2658 | 1.0383 | 0.8733 | 1.0477 | 0.0813 |
| SWAP70     | 0.9446 | 1.2009 | 1.2325 | 0.8131 | 1.0478 | 0.1014 |
| GK5        | 0.9439 | 1.3870 | 1.1042 | 0.7560 | 1.0478 | 0.1336 |
| LOC648794  | 1.0387 | 1.2029 | 0.9726 | 0.9769 | 1.0478 | 0.0539 |
| TRHDE      | 1.0105 | 1.1579 | 1.0485 | 0.9744 | 1.0478 | 0.0397 |
| CST3       | 0.9272 | 1.4156 | 1.0216 | 0.8268 | 1.0478 | 0.1289 |
| MMP1       | 0.9285 | 1.1157 | 1.1547 | 0.9924 | 1.0478 | 0.0527 |
| NTNG2      | 0.9785 | 1.1185 | 1.0970 | 0.9972 | 1.0478 | 0.0351 |

|            |        |        |        |        |        |        |
|------------|--------|--------|--------|--------|--------|--------|
| TANK       | 0.9786 | 1.3033 | 1.0460 | 0.8635 | 1.0478 | 0.0931 |
| EFNA2      | 0.9814 | 1.0585 | 1.1489 | 1.0025 | 1.0479 | 0.0374 |
| LOC1001290 | 0.8259 | 1.2899 | 1.0508 | 1.0249 | 1.0479 | 0.0950 |
| FKBP3      | 1.0580 | 1.1217 | 1.3311 | 0.6809 | 1.0479 | 0.1355 |
| SEMA3F     | 1.0562 | 1.3902 | 1.0846 | 0.6607 | 1.0479 | 0.1496 |
| LOC648257  | 0.9894 | 1.1325 | 1.0490 | 1.0208 | 1.0480 | 0.0307 |
| DHCR24     | 0.9769 | 1.1428 | 1.3205 | 0.7518 | 1.0480 | 0.1211 |
| PLXNA3     | 1.0232 | 1.2954 | 1.0211 | 0.8523 | 1.0480 | 0.0917 |
| ADRB1      | 1.0616 | 1.0945 | 1.1141 | 0.9219 | 1.0480 | 0.0434 |
| IFIT1      | 0.8649 | 1.3019 | 1.2030 | 0.8226 | 1.0481 | 0.1200 |
| LOC376475  | 1.1788 | 1.0900 | 0.9958 | 0.9277 | 1.0481 | 0.0548 |
| SLC37A1    | 1.0050 | 1.3754 | 1.0054 | 0.8068 | 1.0481 | 0.1187 |
| LOC729086  | 0.9842 | 1.1907 | 1.1942 | 0.8235 | 1.0482 | 0.0895 |
| LOC1001345 | 0.6940 | 1.2416 | 1.0623 | 1.1948 | 1.0482 | 0.1240 |
| SELT       | 0.7929 | 1.5648 | 1.0917 | 0.7435 | 1.0482 | 0.1886 |
| HIST1H4B   | 0.9497 | 1.2971 | 1.0416 | 0.9045 | 1.0482 | 0.0877 |
| CLCN4      | 0.9065 | 1.2782 | 1.0797 | 0.9286 | 1.0483 | 0.0858 |
| LOC388255  | 0.9174 | 1.2076 | 1.0079 | 1.0605 | 1.0483 | 0.0608 |
| C1orf168   | 1.1203 | 1.1123 | 1.0913 | 0.8695 | 1.0483 | 0.0599 |
| PTPN20     | 0.8714 | 1.1407 | 1.1298 | 1.0516 | 1.0484 | 0.0623 |
| LOC644992  | 0.9880 | 1.2632 | 0.9990 | 0.9433 | 1.0484 | 0.0726 |
| MOV10L1    | 1.0386 | 1.0646 | 1.0498 | 1.0406 | 1.0484 | 0.0059 |
| LOC644811  | 0.9574 | 1.1480 | 1.1355 | 0.9529 | 1.0484 | 0.0539 |
| TRPC1      | 1.0219 | 1.0758 | 1.1426 | 0.9536 | 1.0485 | 0.0401 |
| C20orf112  | 1.0177 | 1.1300 | 1.1757 | 0.8706 | 1.0485 | 0.0680 |
| COL15A1    | 0.9725 | 1.1606 | 1.0585 | 1.0026 | 1.0485 | 0.0414 |
| LOC649902  | 1.0621 | 1.0603 | 1.0575 | 1.0143 | 1.0486 | 0.0115 |
| LOC650361  | 1.1348 | 1.0516 | 1.0632 | 0.9448 | 1.0486 | 0.0392 |
| IFITM5     | 0.9778 | 1.1656 | 1.0730 | 0.9780 | 1.0486 | 0.0450 |
| MORN1      | 0.9924 | 1.0852 | 1.0809 | 1.0361 | 1.0486 | 0.0218 |
| C14orf28   | 0.9818 | 1.2864 | 1.0081 | 0.9182 | 1.0486 | 0.0815 |
| GRIN2C     | 1.0628 | 1.2100 | 1.1620 | 0.7599 | 1.0487 | 0.1010 |
| LOC650862  | 0.9837 | 1.0039 | 1.1570 | 1.0502 | 1.0487 | 0.0387 |
| KRTHA5     | 1.0772 | 1.0625 | 1.0959 | 0.9591 | 1.0487 | 0.0306 |
| CYP46A1    | 1.0902 | 1.1384 | 1.0617 | 0.9046 | 1.0487 | 0.0506 |
| LOC651006  | 1.0311 | 1.1395 | 1.0855 | 0.9388 | 1.0487 | 0.0428 |
| LOC653291  | 1.0200 | 1.2324 | 1.0614 | 0.8811 | 1.0487 | 0.0724 |
| SYT13      | 1.1277 | 1.0740 | 1.0815 | 0.9120 | 1.0488 | 0.0471 |
| LOC401676  | 0.9288 | 1.2813 | 1.2449 | 0.7403 | 1.0488 | 0.1298 |
| LOC643863  | 1.0203 | 1.1282 | 1.1844 | 0.8625 | 1.0488 | 0.0708 |
| NAPA       | 1.0206 | 1.3022 | 0.9981 | 0.8745 | 1.0489 | 0.0904 |
| HSD17B2    | 1.1092 | 1.1219 | 1.0602 | 0.9041 | 1.0489 | 0.0500 |
| LRRC34     | 1.1491 | 0.9584 | 1.1328 | 0.9552 | 1.0489 | 0.0533 |
| ZNF189     | 1.0070 | 1.3130 | 1.0878 | 0.7878 | 1.0489 | 0.1085 |
| TOMM22     | 0.8518 | 1.4422 | 1.1731 | 0.7285 | 1.0489 | 0.1611 |
| TMEM14D    | 0.8639 | 1.3749 | 1.2607 | 0.6961 | 1.0489 | 0.1607 |

|            |        |        |        |        |        |        |
|------------|--------|--------|--------|--------|--------|--------|
| CLCN6      | 0.9634 | 1.3204 | 1.0755 | 0.8364 | 1.0489 | 0.1028 |
| LOC650909  | 1.0314 | 1.2283 | 1.0106 | 0.9255 | 1.0489 | 0.0640 |
| DSTN       | 0.9331 | 1.4071 | 1.2001 | 0.6557 | 1.0490 | 0.1631 |
| LOC339692  | 1.0085 | 1.1469 | 1.0837 | 0.9569 | 1.0490 | 0.0417 |
| LOC646573  | 0.9638 | 1.2322 | 0.9985 | 1.0018 | 1.0491 | 0.0616 |
| SOD3       | 1.0470 | 1.0202 | 1.0728 | 1.0564 | 1.0491 | 0.0110 |
| MATN1      | 0.9699 | 1.1543 | 1.0465 | 1.0257 | 1.0491 | 0.0386 |
| CDX1       | 0.9695 | 1.1380 | 1.1417 | 0.9472 | 1.0491 | 0.0526 |
| WNK1       | 0.9816 | 1.2551 | 1.1248 | 0.8351 | 1.0491 | 0.0906 |
| CPVL       | 0.9829 | 1.1652 | 1.1400 | 0.9085 | 1.0491 | 0.0618 |
| INSR       | 1.0145 | 1.1309 | 1.0381 | 1.0131 | 1.0491 | 0.0279 |
| LOC643583  | 1.0076 | 1.0055 | 1.1589 | 1.0246 | 1.0491 | 0.0368 |
| TMEM132B   | 0.8398 | 1.3178 | 1.0672 | 0.9719 | 1.0492 | 0.1009 |
| COG2       | 0.8315 | 1.5428 | 1.0578 | 0.7647 | 1.0492 | 0.1761 |
| ZNF653     | 0.9656 | 1.3169 | 1.0127 | 0.9017 | 1.0492 | 0.0921 |
| CTAGE1     | 0.9831 | 1.1908 | 1.0285 | 0.9947 | 1.0493 | 0.0481 |
| VN1R4      | 0.9102 | 1.1903 | 1.0408 | 1.0561 | 1.0494 | 0.0573 |
| LOC729617  | 1.0307 | 1.1961 | 1.1410 | 0.8295 | 1.0494 | 0.0809 |
| LRRC4C     | 1.0056 | 1.1314 | 1.1211 | 0.9393 | 1.0494 | 0.0465 |
| C3orf34    | 0.6816 | 1.1065 | 1.5544 | 0.8550 | 1.0494 | 0.1896 |
| LOC652735  | 1.0896 | 1.0686 | 1.0628 | 0.9768 | 1.0494 | 0.0249 |
| DAP        | 0.8631 | 1.5142 | 1.0159 | 0.8046 | 1.0495 | 0.1612 |
| ACAD10     | 1.0432 | 1.3403 | 1.0953 | 0.7191 | 1.0495 | 0.1278 |
| SYNJ1      | 1.0041 | 1.1839 | 1.1182 | 0.8918 | 1.0495 | 0.0644 |
| FOXB2      | 0.9961 | 1.1956 | 1.1110 | 0.8953 | 1.0495 | 0.0657 |
| TTC9       | 1.0356 | 1.1763 | 1.0267 | 0.9596 | 1.0496 | 0.0455 |
| LOC728636  | 1.0004 | 1.1505 | 1.0812 | 0.9664 | 1.0496 | 0.0414 |
| ZNF429     | 0.8887 | 1.4668 | 1.0958 | 0.7473 | 1.0496 | 0.1564 |
| FCGR1A     | 1.0057 | 1.1558 | 1.0907 | 0.9464 | 1.0497 | 0.0461 |
| SVOPL      | 0.9934 | 1.1437 | 1.0039 | 1.0577 | 1.0497 | 0.0344 |
| VCY1B      | 1.0538 | 1.0681 | 1.0971 | 0.9797 | 1.0497 | 0.0250 |
| PTEN       | 0.8143 | 1.6327 | 0.9969 | 0.7550 | 1.0497 | 0.2010 |
| LOC1001342 | 1.1110 | 1.1233 | 1.0431 | 0.9215 | 1.0497 | 0.0462 |
| FRMPD1     | 0.9934 | 1.1533 | 1.1376 | 0.9146 | 1.0497 | 0.0576 |
| UBTD1      | 1.1795 | 1.1645 | 1.0600 | 0.7950 | 1.0497 | 0.0890 |
| C5orf4     | 1.0304 | 1.1738 | 1.1437 | 0.8510 | 1.0497 | 0.0731 |
| LOC342979  | 1.0243 | 1.0074 | 1.1835 | 0.9839 | 1.0498 | 0.0454 |
| LOC645296  | 0.9616 | 1.4002 | 1.0522 | 0.7852 | 1.0498 | 0.1293 |
| MIXL1      | 0.9844 | 1.1855 | 1.0517 | 0.9776 | 1.0498 | 0.0482 |
| LOC648987  | 1.0139 | 1.3029 | 1.0178 | 0.8648 | 1.0498 | 0.0916 |
| OR2M5      | 0.9731 | 1.2367 | 0.9973 | 0.9922 | 1.0498 | 0.0625 |
| HPCA       | 1.0252 | 1.0508 | 1.1722 | 0.9512 | 1.0498 | 0.0459 |
| CYP2C9     | 1.1053 | 0.9414 | 1.1016 | 1.0513 | 1.0499 | 0.0382 |
| OR8B8      | 0.9462 | 1.1985 | 1.0429 | 1.0119 | 1.0499 | 0.0535 |
| MAP3K9     | 1.0535 | 1.3211 | 0.9480 | 0.8771 | 1.0500 | 0.0974 |
| SREBF1     | 0.9931 | 1.5158 | 0.9740 | 0.7172 | 1.0500 | 0.1675 |



|            |        |        |        |        |        |        |
|------------|--------|--------|--------|--------|--------|--------|
| KIDINS220  | 1.0936 | 1.3797 | 0.9865 | 0.7402 | 1.0500 | 0.1325 |
| LOC649965  | 1.0784 | 1.0902 | 1.1108 | 0.9208 | 1.0500 | 0.0436 |
| LOC1001332 | 1.0289 | 1.1503 | 1.0523 | 0.9687 | 1.0500 | 0.0378 |
| PLAC8L1    | 1.1739 | 1.0330 | 1.0434 | 0.9501 | 1.0501 | 0.0462 |
| CTSO       | 0.9435 | 1.2711 | 1.2071 | 0.7789 | 1.0502 | 0.1149 |
| LOC732215  | 0.6775 | 1.4638 | 1.2378 | 0.8217 | 1.0502 | 0.1820 |
| IL1R1      | 1.0282 | 1.1887 | 1.1117 | 0.8726 | 1.0503 | 0.0677 |
| VPS16      | 0.9364 | 1.4531 | 0.9601 | 0.8516 | 1.0503 | 0.1363 |
| ISG20L1    | 0.7509 | 1.5121 | 1.2848 | 0.6535 | 1.0503 | 0.2072 |
| LOC643350  | 1.0408 | 1.1680 | 1.0176 | 0.9751 | 1.0504 | 0.0415 |
| MED26      | 1.0558 | 1.4113 | 0.9076 | 0.8267 | 1.0504 | 0.1293 |
| RPS17      | 0.9777 | 1.3551 | 1.0773 | 0.7915 | 1.0504 | 0.1176 |
| FLT1       | 0.9255 | 1.1198 | 1.2117 | 0.9446 | 1.0504 | 0.0693 |
| ZNF563     | 0.9602 | 1.2327 | 1.0567 | 0.9523 | 1.0505 | 0.0652 |
| LOC646823  | 1.0040 | 1.1707 | 1.1070 | 0.9204 | 1.0505 | 0.0553 |
| LOC645643  | 0.9634 | 1.1724 | 1.1180 | 0.9483 | 1.0505 | 0.0559 |
| ITPKB      | 0.9969 | 1.3764 | 0.9876 | 0.8412 | 1.0505 | 0.1143 |
| REXO1L6P   | 0.8439 | 1.1912 | 1.1941 | 0.9730 | 1.0506 | 0.0862 |
| C2orf55    | 0.9136 | 1.5660 | 0.9616 | 0.7613 | 1.0506 | 0.1770 |
| RER1       | 1.1192 | 1.2992 | 1.0296 | 0.7547 | 1.0507 | 0.1135 |
| SRY        | 0.9305 | 1.0552 | 1.1484 | 1.0686 | 1.0507 | 0.0450 |
| FADD       | 0.9886 | 1.4213 | 1.0609 | 0.7320 | 1.0507 | 0.1423 |
| TAF1C      | 0.9762 | 1.2415 | 1.1340 | 0.8511 | 1.0507 | 0.0860 |
| MIR130B    | 0.9550 | 1.1577 | 1.1202 | 0.9701 | 1.0507 | 0.0516 |
| SH3BP5L    | 0.9392 | 1.5737 | 0.8566 | 0.8336 | 1.0508 | 0.1758 |
| ASH1L      | 1.0159 | 1.2201 | 1.0193 | 0.9478 | 1.0508 | 0.0588 |
| TMEM43     | 0.9843 | 1.3430 | 1.0827 | 0.7935 | 1.0509 | 0.1144 |
| SHISA2     | 1.0140 | 1.1126 | 1.1201 | 0.9567 | 1.0509 | 0.0396 |
| FERD3L     | 0.9560 | 1.0952 | 1.1612 | 0.9913 | 1.0509 | 0.0471 |
| WFS1       | 0.9376 | 1.4832 | 0.9461 | 0.8369 | 1.0509 | 0.1462 |
| CD244      | 0.8932 | 1.2317 | 1.1839 | 0.8949 | 1.0510 | 0.0911 |
| AKR1A1     | 0.9639 | 1.4302 | 1.0708 | 0.7390 | 1.0510 | 0.1441 |
| CDK10      | 0.9915 | 1.4345 | 1.0354 | 0.7426 | 1.0510 | 0.1432 |
| NEDD9      | 0.9965 | 1.2266 | 1.0686 | 0.9125 | 1.0510 | 0.0666 |
| BACE1      | 0.9701 | 1.1472 | 1.1687 | 0.9182 | 1.0510 | 0.0628 |
| LOC644650  | 0.9091 | 1.2372 | 1.1003 | 0.9576 | 1.0510 | 0.0741 |
| LOC1001335 | 0.8608 | 1.3574 | 1.2190 | 0.7671 | 1.0511 | 0.1411 |
| VEPH1      | 1.0099 | 1.1020 | 1.1682 | 0.9247 | 1.0512 | 0.0532 |
| LOC400652  | 1.1567 | 1.0814 | 1.1536 | 0.8131 | 1.0512 | 0.0813 |
| C2orf79    | 0.8264 | 1.4490 | 1.1867 | 0.7435 | 1.0514 | 0.1638 |
| LOC728429  | 1.1104 | 1.0902 | 1.1380 | 0.8670 | 1.0514 | 0.0622 |
| ALDH5A1    | 1.0240 | 1.2304 | 1.2331 | 0.7182 | 1.0514 | 0.1214 |
| MIR2116    | 0.9319 | 1.2251 | 0.9579 | 1.0909 | 1.0514 | 0.0676 |
| LOC1001301 | 1.0100 | 1.3756 | 0.9278 | 0.8924 | 1.0515 | 0.1108 |
| TMEM86B    | 1.0588 | 1.1124 | 1.1132 | 0.9214 | 1.0515 | 0.0452 |
| LOC1001292 | 0.9748 | 1.1207 | 1.0880 | 1.0224 | 1.0515 | 0.0327 |

|            |        |        |        |        |        |        |
|------------|--------|--------|--------|--------|--------|--------|
| KCNK9      | 1.0249 | 1.1977 | 1.0608 | 0.9225 | 1.0515 | 0.0569 |
| KRT80      | 0.9306 | 1.2594 | 1.0811 | 0.9348 | 1.0515 | 0.0776 |
| LOC653645  | 0.8720 | 1.1700 | 1.1447 | 1.0193 | 1.0515 | 0.0683 |
| LOC646424  | 1.0084 | 1.2594 | 1.0235 | 0.9149 | 1.0516 | 0.0733 |
| GPRASP2    | 0.9700 | 1.3050 | 1.0661 | 0.8652 | 1.0516 | 0.0939 |
| UBA2       | 0.9686 | 1.2581 | 1.1228 | 0.8568 | 1.0516 | 0.0878 |
| GSX1       | 0.9642 | 1.1395 | 1.0803 | 1.0225 | 1.0516 | 0.0377 |
| LOC644620  | 0.9833 | 1.1120 | 1.1295 | 0.9817 | 1.0516 | 0.0401 |
| LOC642648  | 1.0437 | 1.0074 | 1.2442 | 0.9113 | 1.0517 | 0.0700 |
| BASP1      | 0.9131 | 1.3344 | 1.1949 | 0.7647 | 1.0518 | 0.1297 |
| LOC644126  | 1.0195 | 1.1050 | 1.1106 | 0.9721 | 1.0518 | 0.0338 |
| CCBE1      | 0.9851 | 1.1792 | 1.2132 | 0.8297 | 1.0518 | 0.0895 |
| HAPLN3     | 1.0616 | 1.1279 | 1.0752 | 0.9426 | 1.0518 | 0.0391 |
| FAM39E     | 0.9153 | 1.5074 | 0.9650 | 0.8196 | 1.0518 | 0.1548 |
| C4orf3     | 0.9438 | 1.1432 | 1.1236 | 0.9967 | 1.0518 | 0.0485 |
| LOC648791  | 0.9832 | 1.2051 | 1.0500 | 0.9691 | 1.0519 | 0.0540 |
| LOC1001331 | 1.0097 | 0.9711 | 1.1999 | 1.0268 | 1.0519 | 0.0507 |
| ERCC-00116 | 1.1330 | 1.1055 | 0.9805 | 0.9886 | 1.0519 | 0.0393 |
| GRIN3A     | 1.0735 | 1.1278 | 1.1556 | 0.8508 | 1.0519 | 0.0692 |
| LOC283710  | 0.9185 | 1.2114 | 1.0651 | 1.0127 | 1.0519 | 0.0612 |
| CPAMD8     | 0.9926 | 1.0885 | 1.1203 | 1.0064 | 1.0520 | 0.0311 |
| RSPH1      | 0.9858 | 1.2904 | 1.1191 | 0.8127 | 1.0520 | 0.1012 |
| LOC1001312 | 1.0504 | 1.2301 | 1.1796 | 0.7481 | 1.0520 | 0.1081 |
| SLC9A10    | 1.0089 | 1.1627 | 1.1383 | 0.8984 | 1.0521 | 0.0614 |
| RIMS2      | 0.9335 | 1.2892 | 0.9011 | 1.0851 | 1.0522 | 0.0886 |
| LOC1001320 | 0.8794 | 1.4320 | 1.1769 | 0.7208 | 1.0523 | 0.1580 |
| LOC653103  | 0.9973 | 1.5291 | 0.8927 | 0.7901 | 1.0523 | 0.1645 |
| VPS18      | 1.0729 | 1.2506 | 1.1056 | 0.7800 | 1.0523 | 0.0986 |
| GXYLT1     | 0.9191 | 1.2780 | 1.1301 | 0.8822 | 1.0523 | 0.0930 |
| SMPD1      | 1.0471 | 1.2946 | 1.0831 | 0.7849 | 1.0524 | 0.1046 |
| CDNF       | 1.0559 | 1.1695 | 1.0323 | 0.9522 | 1.0525 | 0.0449 |
| RGS19      | 1.0475 | 1.4437 | 0.8817 | 0.8370 | 1.0525 | 0.1380 |
| LOC1001287 | 0.8779 | 1.4685 | 1.0707 | 0.7928 | 1.0525 | 0.1504 |
| PCMT1      | 0.8310 | 1.3975 | 1.1489 | 0.8329 | 1.0525 | 0.1371 |
| EDAR       | 0.9636 | 1.2177 | 1.1018 | 0.9273 | 1.0526 | 0.0666 |
| LOC1001290 | 1.0244 | 1.2204 | 1.3204 | 0.6451 | 1.0526 | 0.1491 |
| KIAA1843   | 0.9506 | 1.1264 | 1.0373 | 1.0964 | 1.0527 | 0.0387 |
| PRSS35     | 0.9794 | 1.1554 | 1.0531 | 1.0228 | 1.0527 | 0.0375 |
| LOC441294  | 0.9105 | 1.3393 | 0.9757 | 0.9852 | 1.0527 | 0.0970 |
| C1orf54    | 0.9603 | 1.2605 | 1.0643 | 0.9257 | 1.0527 | 0.0753 |
| TSPAN10    | 0.9934 | 1.3765 | 0.9920 | 0.8490 | 1.0527 | 0.1131 |
| ZNF397OS   | 1.0233 | 1.2284 | 1.0491 | 0.9102 | 1.0528 | 0.0659 |
| KANK4      | 0.9379 | 1.3326 | 1.0505 | 0.8901 | 1.0528 | 0.0991 |
| TSC1       | 1.0259 | 1.3515 | 1.0506 | 0.7832 | 1.0528 | 0.1164 |
| LOC649680  | 1.0147 | 1.0816 | 1.0968 | 1.0181 | 1.0528 | 0.0212 |
| LOC650867  | 1.1442 | 1.1252 | 1.0154 | 0.9268 | 1.0529 | 0.0507 |

|            |        |        |        |        |        |        |
|------------|--------|--------|--------|--------|--------|--------|
| RDH11      | 0.9397 | 1.4133 | 1.0995 | 0.7591 | 1.0529 | 0.1388 |
| PNLIPRP2   | 1.0673 | 1.0788 | 1.0751 | 0.9905 | 1.0530 | 0.0210 |
| LATS2      | 0.9382 | 1.2388 | 1.1527 | 0.8822 | 1.0530 | 0.0851 |
| ZC4H2      | 0.9520 | 1.4099 | 0.9731 | 0.8769 | 1.0530 | 0.1208 |
| MIR153-1   | 0.9741 | 1.0853 | 1.1469 | 1.0058 | 1.0530 | 0.0391 |
| BIRC3      | 0.9259 | 1.2842 | 1.1008 | 0.9015 | 1.0531 | 0.0889 |
| CUEDC1     | 0.9683 | 1.4318 | 0.9603 | 0.8521 | 1.0531 | 0.1290 |
| ARHGEF5L   | 0.9414 | 1.4607 | 1.0166 | 0.7939 | 1.0531 | 0.1435 |
| RNF144A    | 1.0969 | 1.3713 | 0.9862 | 0.7585 | 1.0532 | 0.1273 |
| RLBP1L1    | 0.9977 | 1.1509 | 1.1300 | 0.9343 | 1.0532 | 0.0522 |
| LOC1001331 | 0.9986 | 1.2071 | 0.9842 | 1.0230 | 1.0532 | 0.0519 |
| LOC651845  | 0.9815 | 1.2969 | 1.1488 | 0.7859 | 1.0533 | 0.1100 |
| LOC1001332 | 1.0507 | 1.2704 | 1.0625 | 0.8295 | 1.0533 | 0.0900 |
| FAM101A    | 0.8918 | 1.1012 | 1.2689 | 0.9513 | 1.0533 | 0.0843 |
| ATP2C1     | 0.9871 | 1.3636 | 1.1372 | 0.7254 | 1.0533 | 0.1339 |
| MKL1       | 0.9679 | 1.3725 | 0.9701 | 0.9029 | 1.0533 | 0.1075 |
| WASH1      | 1.0241 | 1.1251 | 1.2766 | 0.7877 | 1.0534 | 0.1026 |
| TRPM5      | 0.9836 | 1.1269 | 1.1345 | 0.9687 | 1.0534 | 0.0447 |
| PGM3       | 0.9159 | 1.4264 | 1.1609 | 0.7109 | 1.0535 | 0.1546 |
| TTC17      | 0.9326 | 1.5308 | 1.0014 | 0.7493 | 1.0535 | 0.1677 |
| THYN1      | 0.8252 | 1.5164 | 1.1157 | 0.7569 | 1.0536 | 0.1728 |
| LOC728693  | 1.0907 | 1.3757 | 0.9871 | 0.7607 | 1.0536 | 0.1276 |
| LOC1001315 | 0.8386 | 1.2854 | 1.2737 | 0.8166 | 1.0536 | 0.1306 |
| LOC644097  | 0.9877 | 1.2227 | 1.0833 | 0.9208 | 1.0536 | 0.0655 |
| GABRA3     | 0.9506 | 1.2171 | 1.1099 | 0.9367 | 1.0536 | 0.0672 |
| ACBD4      | 1.0117 | 1.2881 | 1.0648 | 0.8497 | 1.0536 | 0.0906 |
| LOC391761  | 0.9536 | 1.1939 | 1.1909 | 0.8761 | 1.0536 | 0.0817 |
| LOC1001301 | 1.0281 | 1.0414 | 1.1317 | 1.0135 | 1.0537 | 0.0266 |
| BCKDHA     | 1.0961 | 1.4818 | 0.9372 | 0.6995 | 1.0537 | 0.1644 |
| LOC399829  | 1.0074 | 1.1244 | 1.1135 | 0.9695 | 1.0537 | 0.0385 |
| STK11      | 1.0251 | 1.2636 | 1.1304 | 0.7957 | 1.0537 | 0.0989 |
| TAF15      | 0.8503 | 1.5944 | 0.9522 | 0.8179 | 1.0537 | 0.1825 |
| JHDM1D     | 0.9956 | 1.2408 | 0.9677 | 1.0106 | 1.0537 | 0.0630 |
| ARHGEF7    | 1.0773 | 1.2718 | 1.0116 | 0.8543 | 1.0538 | 0.0864 |
| LOC644320  | 1.0504 | 1.0970 | 1.0634 | 1.0043 | 1.0538 | 0.0192 |
| PPP1CB     | 0.9920 | 1.2989 | 1.1382 | 0.7861 | 1.0538 | 0.1090 |
| TOMM7      | 1.0457 | 1.2525 | 1.1415 | 0.7755 | 1.0538 | 0.1019 |
| ZCWPW1     | 1.0048 | 1.1805 | 1.1044 | 0.9254 | 1.0538 | 0.0559 |
| ARL4C      | 1.0809 | 1.0733 | 1.0092 | 1.0523 | 1.0539 | 0.0161 |
| PABPC5     | 1.0218 | 1.2649 | 1.0746 | 0.8546 | 1.0540 | 0.0845 |
| RNH1       | 0.9172 | 1.4145 | 1.1147 | 0.7697 | 1.0540 | 0.1394 |
| LOC148696  | 0.9073 | 1.3608 | 1.0630 | 0.8850 | 1.0540 | 0.1097 |
| PRINS      | 1.0729 | 1.2468 | 0.9359 | 0.9605 | 1.0541 | 0.0708 |
| PCSK9      | 0.9823 | 1.3344 | 1.0243 | 0.8753 | 1.0541 | 0.0986 |
| MUL1       | 0.9538 | 1.5405 | 0.9613 | 0.7607 | 1.0541 | 0.1687 |
| CCDC81     | 1.0064 | 1.3151 | 1.0404 | 0.8544 | 1.0541 | 0.0960 |

|            |        |        |        |        |        |        |
|------------|--------|--------|--------|--------|--------|--------|
| LOC440389  | 0.9510 | 1.1814 | 1.0864 | 0.9977 | 1.0541 | 0.0509 |
| GNRH1      | 1.0819 | 1.3639 | 0.9965 | 0.7743 | 1.0541 | 0.1219 |
| PLK2       | 1.1916 | 0.8921 | 1.2817 | 0.8511 | 1.0541 | 0.1073 |
| PCDHA8     | 1.0888 | 1.0718 | 1.1483 | 0.9077 | 1.0542 | 0.0515 |
| TNIP2      | 0.8935 | 1.4166 | 1.0554 | 0.8512 | 1.0542 | 0.1286 |
| RPS6KA6    | 1.0400 | 1.3115 | 0.9953 | 0.8700 | 1.0542 | 0.0930 |
| CYB5A      | 0.9398 | 1.3428 | 1.1352 | 0.7990 | 1.0542 | 0.1183 |
| PCBP3      | 1.0138 | 0.9393 | 1.2534 | 1.0110 | 1.0544 | 0.0685 |
| MIR548F4   | 1.0115 | 1.0609 | 1.1336 | 1.0117 | 1.0544 | 0.0288 |
| CST9       | 1.1411 | 1.1724 | 0.9796 | 0.9247 | 1.0545 | 0.0605 |
| LOC1001291 | 0.9966 | 1.1437 | 1.1711 | 0.9066 | 1.0545 | 0.0624 |
| LOC504188  | 0.9466 | 1.1813 | 1.1388 | 0.9516 | 1.0546 | 0.0615 |
| LOC648343  | 0.8844 | 1.2660 | 1.2101 | 0.8579 | 1.0546 | 0.1067 |
| RPL9       | 1.0069 | 1.1714 | 1.1953 | 0.8448 | 1.0546 | 0.0815 |
| RPS27      | 1.0120 | 1.1722 | 1.1227 | 0.9115 | 1.0546 | 0.0583 |
| FAM117A    | 1.1375 | 1.1017 | 1.0454 | 0.9338 | 1.0546 | 0.0445 |
| KIAA0913   | 0.9724 | 1.5222 | 0.9711 | 0.7528 | 1.0546 | 0.1642 |
| SNAPIN     | 0.9083 | 1.6750 | 0.8772 | 0.7581 | 1.0546 | 0.2093 |
| RGS4       | 1.0889 | 1.1575 | 1.0318 | 0.9405 | 1.0547 | 0.0459 |
| TMEM33     | 1.0704 | 1.1936 | 1.2546 | 0.7003 | 1.0547 | 0.1242 |
| LOC651900  | 1.2155 | 1.0095 | 1.0813 | 0.9126 | 1.0547 | 0.0638 |
| AMAC1      | 1.0168 | 1.2790 | 0.9851 | 0.9379 | 1.0547 | 0.0765 |
| LRRTM4     | 1.0408 | 1.1302 | 1.1067 | 0.9413 | 1.0547 | 0.0423 |
| PPP4C      | 0.9035 | 1.4431 | 1.1042 | 0.7682 | 1.0548 | 0.1467 |
| TSPAN13    | 1.0431 | 1.4237 | 0.8825 | 0.8699 | 1.0548 | 0.1291 |
| AKT1       | 1.0697 | 1.5054 | 0.8673 | 0.7769 | 1.0548 | 0.1622 |
| LOC440991  | 0.9668 | 1.3763 | 1.2782 | 0.5981 | 1.0549 | 0.1755 |
| VMO1       | 1.0044 | 1.1110 | 1.1303 | 0.9743 | 1.0550 | 0.0386 |
| DDB1       | 0.9084 | 1.4716 | 1.0715 | 0.7685 | 1.0550 | 0.1520 |
| GREM2      | 1.0096 | 1.1396 | 1.0588 | 1.0122 | 1.0550 | 0.0304 |
| PTPN13     | 0.9592 | 1.4633 | 1.0280 | 0.7696 | 1.0550 | 0.1466 |
| GPR20      | 1.0337 | 1.2502 | 0.9519 | 0.9845 | 1.0551 | 0.0672 |
| CEBPD      | 1.0407 | 1.3525 | 1.0407 | 0.7864 | 1.0551 | 0.1158 |
| LOC643431  | 0.9929 | 1.1071 | 1.2324 | 0.8879 | 1.0551 | 0.0741 |
| LOC401321  | 1.0465 | 1.1749 | 1.1405 | 0.8588 | 1.0552 | 0.0709 |
| LOC401056  | 1.0887 | 1.0801 | 1.0486 | 1.0034 | 1.0552 | 0.0193 |
| R3HDM2     | 1.0606 | 1.2992 | 1.0548 | 0.8064 | 1.0552 | 0.1006 |
| CALCOCO2   | 0.9652 | 1.2528 | 1.0870 | 0.9160 | 1.0552 | 0.0750 |
| LOC728799  | 1.0602 | 1.2335 | 0.9608 | 0.9665 | 1.0552 | 0.0636 |
| BOLA2B     | 1.0377 | 1.2722 | 1.0367 | 0.8745 | 1.0553 | 0.0818 |
| EID2B      | 0.8006 | 1.1470 | 1.5550 | 0.7186 | 1.0553 | 0.1907 |
| LOC652547  | 0.9390 | 1.0550 | 1.1760 | 1.0514 | 1.0553 | 0.0484 |
| HMGCL      | 1.0593 | 1.2845 | 1.1190 | 0.7587 | 1.0553 | 0.1098 |
| FAM108A3   | 0.9395 | 1.4786 | 0.9432 | 0.8602 | 1.0554 | 0.1424 |
| LOC388556  | 0.8479 | 1.4255 | 1.1621 | 0.7865 | 1.0555 | 0.1482 |
| NPAS1      | 1.0803 | 1.1641 | 1.0416 | 0.9361 | 1.0555 | 0.0473 |

|            |        |        |        |        |        |        |
|------------|--------|--------|--------|--------|--------|--------|
| LOC645895  | 0.9080 | 1.3578 | 1.1989 | 0.7574 | 1.0555 | 0.1362 |
| C16orf79   | 0.9887 | 1.2335 | 1.1802 | 0.8198 | 1.0556 | 0.0945 |
| LOC649839  | 0.9919 | 1.1812 | 1.1646 | 0.8846 | 1.0556 | 0.0713 |
| TRADD      | 1.0965 | 1.2734 | 0.9743 | 0.8783 | 1.0556 | 0.0852 |
| FLJ44674   | 1.0746 | 1.2521 | 1.1024 | 0.7935 | 1.0557 | 0.0957 |
| TBC1D5     | 1.0146 | 1.3838 | 0.9553 | 0.8690 | 1.0557 | 0.1134 |
| CRAMP1L    | 1.1802 | 1.3910 | 0.8391 | 0.8124 | 1.0557 | 0.1397 |
| CLUL1      | 1.0701 | 1.2440 | 1.0278 | 0.8809 | 1.0557 | 0.0747 |
| CXorf61    | 0.9599 | 1.1828 | 1.1414 | 0.9388 | 1.0557 | 0.0621 |
| C5orf49    | 0.9763 | 1.1555 | 1.1220 | 0.9695 | 1.0558 | 0.0484 |
| LOC145814  | 0.8842 | 1.2037 | 1.1104 | 1.0250 | 1.0558 | 0.0679 |
| MIR1281    | 0.9222 | 1.2015 | 1.1068 | 0.9929 | 1.0558 | 0.0616 |
| SLC25A4    | 0.9514 | 1.4946 | 1.0001 | 0.7773 | 1.0559 | 0.1539 |
| NAV3       | 1.1131 | 1.1524 | 1.0860 | 0.8721 | 1.0559 | 0.0628 |
| LOC731096  | 1.0798 | 1.2909 | 1.0115 | 0.8415 | 1.0559 | 0.0930 |
| SVIP       | 0.9546 | 1.1688 | 1.0484 | 1.0519 | 1.0559 | 0.0439 |
| LOC648103  | 0.9077 | 1.2471 | 1.0372 | 1.0318 | 1.0559 | 0.0704 |
| TMIGD2     | 0.9770 | 1.1660 | 1.0888 | 0.9920 | 1.0559 | 0.0443 |
| LOC391160  | 1.0378 | 1.1559 | 1.0534 | 0.9771 | 1.0561 | 0.0371 |
| LOC728875  | 1.0515 | 1.0868 | 1.0994 | 0.9865 | 1.0561 | 0.0253 |
| KIF3A      | 0.9461 | 1.1864 | 1.1120 | 0.9798 | 1.0561 | 0.0563 |
| MLYCD      | 0.9335 | 1.4845 | 0.9809 | 0.8254 | 1.0561 | 0.1465 |
| LIPF       | 1.1143 | 1.1632 | 0.9925 | 0.9544 | 1.0561 | 0.0494 |
| LOC642617  | 1.0500 | 1.0917 | 1.0940 | 0.9888 | 1.0561 | 0.0246 |
| LOC642076  | 1.1034 | 1.1546 | 1.0384 | 0.9281 | 1.0561 | 0.0488 |
| PCP2       | 1.0264 | 1.1554 | 1.0296 | 1.0133 | 1.0562 | 0.0333 |
| PGBD3      | 0.9575 | 1.5062 | 1.0134 | 0.7477 | 1.0562 | 0.1605 |
| SLAMF7     | 1.0101 | 1.0900 | 1.1127 | 1.0120 | 1.0562 | 0.0265 |
| HKDC1      | 0.9785 | 1.2606 | 1.0337 | 0.9520 | 1.0562 | 0.0702 |
| GAD1       | 1.0438 | 1.2226 | 1.0958 | 0.8630 | 1.0563 | 0.0746 |
| SLC6A8     | 1.0268 | 1.4030 | 0.9621 | 0.8335 | 1.0563 | 0.1223 |
| SNORD64    | 0.9705 | 1.1252 | 1.0982 | 1.0315 | 1.0563 | 0.0347 |
| LOC643376  | 1.0685 | 1.0887 | 1.0357 | 1.0325 | 1.0563 | 0.0135 |
| STK19      | 0.9854 | 1.4098 | 1.0010 | 0.8292 | 1.0563 | 0.1240 |
| SNORD95    | 0.9561 | 1.2688 | 1.1120 | 0.8884 | 1.0563 | 0.0849 |
| LOC1001343 | 0.9336 | 1.0320 | 1.2493 | 1.0107 | 1.0564 | 0.0677 |
| GSDMC      | 1.0540 | 1.0765 | 1.1171 | 0.9780 | 1.0564 | 0.0292 |
| LOC729900  | 0.9923 | 1.1586 | 1.1396 | 0.9352 | 1.0564 | 0.0549 |
| RFPL1      | 0.9763 | 1.0866 | 1.3067 | 0.8564 | 1.0565 | 0.0957 |
| LOC1001298 | 0.9440 | 1.4372 | 1.0591 | 0.7857 | 1.0565 | 0.1387 |
| ALDH1L1    | 0.9218 | 1.1703 | 1.1833 | 0.9506 | 1.0565 | 0.0697 |
| LIPL3      | 0.8957 | 1.2070 | 1.1270 | 0.9963 | 1.0565 | 0.0690 |
| LOC1001329 | 1.0248 | 1.1810 | 1.1159 | 0.9044 | 1.0565 | 0.0600 |
| ZNF605     | 1.0453 | 1.5363 | 0.8804 | 0.7643 | 1.0566 | 0.1700 |
| LOC646098  | 1.0787 | 1.0923 | 1.0378 | 1.0176 | 1.0566 | 0.0174 |
| KCNJ6      | 1.0641 | 1.0691 | 1.1684 | 0.9248 | 1.0566 | 0.0501 |

|            |        |        |        |        |        |        |
|------------|--------|--------|--------|--------|--------|--------|
| GABRB1     | 1.0628 | 1.0357 | 1.1390 | 0.9891 | 1.0567 | 0.0314 |
| MIR194-1   | 1.0027 | 1.0512 | 1.1518 | 1.0210 | 1.0567 | 0.0333 |
| RPL35A     | 1.0117 | 1.1832 | 1.1869 | 0.8450 | 1.0567 | 0.0815 |
| C8orf17    | 1.1968 | 1.1264 | 0.9979 | 0.9059 | 1.0567 | 0.0650 |
| ZNF226     | 1.1120 | 1.1229 | 1.1292 | 0.8628 | 1.0567 | 0.0647 |
| ZNF362     | 1.0937 | 1.3540 | 0.9533 | 0.8259 | 1.0567 | 0.1132 |
| THBD       | 0.9994 | 1.2895 | 0.9949 | 0.9431 | 1.0567 | 0.0786 |
| HTR1E      | 0.8476 | 1.2923 | 1.1482 | 0.9388 | 1.0567 | 0.1006 |
| SLIC1      | 0.9702 | 1.1620 | 1.0581 | 1.0368 | 1.0568 | 0.0398 |
| UBE2E3     | 0.9764 | 1.3791 | 1.0779 | 0.7939 | 1.0568 | 0.1224 |
| LOC643850  | 0.9092 | 1.2325 | 1.0979 | 0.9877 | 1.0568 | 0.0702 |
| LOC1001348 | 1.0429 | 1.2362 | 1.0668 | 0.8817 | 1.0569 | 0.0725 |
| TP53BP1    | 0.9868 | 1.3782 | 0.8889 | 0.9736 | 1.0569 | 0.1093 |
| EEF1G      | 0.8602 | 1.4756 | 1.0787 | 0.8132 | 1.0569 | 0.1511 |
| ZNF544     | 0.7778 | 1.5966 | 1.1202 | 0.7331 | 1.0569 | 0.1996 |
| LOC642755  | 0.8583 | 1.5790 | 1.0315 | 0.7591 | 1.0570 | 0.1829 |
| dJ341D10.1 | 1.0045 | 1.2624 | 1.1007 | 0.8603 | 1.0570 | 0.0844 |
| RNF7       | 0.9175 | 1.4695 | 1.1377 | 0.7032 | 1.0570 | 0.1636 |
| AKTIP      | 0.9441 | 1.4481 | 1.0268 | 0.8090 | 1.0570 | 0.1379 |
| DUSP22     | 1.0043 | 1.3918 | 1.0420 | 0.7900 | 1.0570 | 0.1246 |
| LOC729703  | 0.9566 | 1.1487 | 1.0740 | 1.0490 | 1.0571 | 0.0396 |
| LOC650751  | 0.9528 | 1.1690 | 1.2009 | 0.9061 | 1.0572 | 0.0747 |
| C20orf75   | 1.1412 | 1.0620 | 1.0777 | 0.9482 | 1.0573 | 0.0402 |
| LOC729989  | 0.9375 | 1.2618 | 1.0467 | 0.9831 | 1.0573 | 0.0718 |
| LOC643677  | 0.9901 | 1.1575 | 1.1396 | 0.9420 | 1.0573 | 0.0537 |
| ASZ1       | 0.9694 | 1.1299 | 1.2255 | 0.9045 | 1.0573 | 0.0734 |
| EPHA1      | 1.1209 | 1.3535 | 0.9197 | 0.8354 | 1.0574 | 0.1154 |
| PLXDC1     | 0.9857 | 1.1592 | 1.0215 | 1.0634 | 1.0575 | 0.0374 |
| LOC641958  | 0.9508 | 1.1898 | 1.1648 | 0.9246 | 1.0575 | 0.0696 |
| OR13C8     | 1.1242 | 1.0130 | 1.0683 | 1.0245 | 1.0575 | 0.0252 |
| GLOD5      | 1.0631 | 1.2319 | 1.0713 | 0.8637 | 1.0575 | 0.0754 |
| WAS        | 1.0953 | 1.1901 | 1.0157 | 0.9289 | 1.0575 | 0.0557 |
| DTX1       | 1.0033 | 1.1453 | 1.1518 | 0.9296 | 1.0575 | 0.0547 |
| PKP2       | 1.0632 | 1.3246 | 1.0549 | 0.7874 | 1.0575 | 0.1097 |
| FLJ20021   | 0.8771 | 1.4549 | 1.1466 | 0.7516 | 1.0575 | 0.1560 |
| RBP2       | 1.0055 | 1.1718 | 1.0868 | 0.9663 | 1.0576 | 0.0456 |
| EPB41L3    | 1.0618 | 1.1017 | 1.0689 | 0.9979 | 1.0576 | 0.0217 |
| LOC652701  | 0.9840 | 1.1413 | 1.1386 | 0.9665 | 1.0576 | 0.0477 |
| SMURF2     | 1.0387 | 1.1813 | 1.1012 | 0.9094 | 1.0577 | 0.0574 |
| COX7C      | 1.0055 | 1.2587 | 1.0718 | 0.8947 | 1.0577 | 0.0763 |
| GLTP       | 0.9990 | 1.3108 | 1.1854 | 0.7356 | 1.0577 | 0.1250 |
| MAP3K6     | 0.9289 | 1.6095 | 0.9957 | 0.6968 | 1.0577 | 0.1948 |
| KIAA0355   | 0.8673 | 1.6361 | 0.8745 | 0.8531 | 1.0577 | 0.1928 |
| LOC729404  | 0.9392 | 1.1782 | 1.1831 | 0.9305 | 1.0577 | 0.0710 |
| LOC643570  | 1.0557 | 1.2066 | 1.1270 | 0.8421 | 1.0578 | 0.0782 |
| MAGEA10    | 0.9232 | 1.5515 | 1.0586 | 0.6982 | 1.0579 | 0.1806 |

|            |        |        |        |        |        |        |
|------------|--------|--------|--------|--------|--------|--------|
| TMEM59     | 0.8645 | 1.5602 | 1.0708 | 0.7364 | 1.0580 | 0.1810 |
| TAF9B      | 1.0541 | 1.2070 | 1.0451 | 0.9257 | 1.0580 | 0.0576 |
| LOC728591  | 1.0161 | 1.1304 | 1.0507 | 1.0347 | 1.0580 | 0.0252 |
| HSPA1B     | 0.8984 | 1.4555 | 1.0833 | 0.7947 | 1.0580 | 0.1453 |
| AMH        | 1.0330 | 1.2132 | 1.0357 | 0.9502 | 1.0581 | 0.0554 |
| RSC1A1     | 0.8935 | 1.4584 | 1.0455 | 0.8350 | 1.0581 | 0.1406 |
| C5orf13    | 1.0342 | 1.5258 | 0.9402 | 0.7323 | 1.0581 | 0.1682 |
| LOC642993  | 0.9349 | 1.2139 | 1.0736 | 1.0101 | 1.0581 | 0.0592 |
| ZNF841     | 1.2411 | 1.1921 | 1.0532 | 0.7462 | 1.0582 | 0.1113 |
| PDCD7      | 1.0101 | 1.3776 | 1.0793 | 0.7660 | 1.0583 | 0.1259 |
| LOC1001328 | 1.0692 | 1.2751 | 0.9838 | 0.9050 | 1.0583 | 0.0797 |
| GFAP       | 1.1090 | 1.0102 | 1.0878 | 1.0261 | 1.0583 | 0.0238 |
| DMAP1      | 0.8554 | 1.6667 | 0.9428 | 0.7684 | 1.0583 | 0.2059 |
| LOC649616  | 1.0796 | 1.1127 | 1.2103 | 0.8310 | 1.0584 | 0.0807 |
| KRT72      | 1.0025 | 1.1714 | 1.0961 | 0.9638 | 1.0585 | 0.0468 |
| LOC1001923 | 0.9125 | 1.2605 | 1.1020 | 0.9589 | 1.0585 | 0.0785 |
| CDKN2B     | 1.0285 | 1.2089 | 1.0574 | 0.9392 | 1.0585 | 0.0561 |
| LOC402117  | 1.0930 | 1.1194 | 1.0804 | 0.9413 | 1.0585 | 0.0399 |
| BRP44L     | 0.9785 | 1.1708 | 1.3545 | 0.7304 | 1.0585 | 0.1336 |
| LOC285307  | 1.0814 | 1.1482 | 1.0792 | 0.9253 | 1.0585 | 0.0472 |
| TCTE1      | 1.0141 | 1.1284 | 1.1398 | 0.9519 | 1.0586 | 0.0455 |
| ARHGEF18   | 0.9746 | 1.4877 | 0.9793 | 0.7926 | 1.0586 | 0.1495 |
| ZNF543     | 1.0467 | 1.2456 | 0.9816 | 0.9608 | 1.0587 | 0.0649 |
| VIPR2      | 1.0806 | 1.1983 | 1.0131 | 0.9427 | 1.0587 | 0.0544 |
| LOC1001336 | 1.1193 | 1.0625 | 1.0945 | 0.9587 | 1.0588 | 0.0353 |
| LOC652202  | 1.0334 | 1.1675 | 1.0199 | 1.0144 | 1.0588 | 0.0365 |
| EPHA3      | 1.0128 | 1.1907 | 1.2253 | 0.8066 | 1.0588 | 0.0961 |
| UPLP       | 1.0057 | 1.1601 | 1.2460 | 0.8237 | 1.0589 | 0.0928 |
| DHRS1      | 0.9315 | 1.4611 | 1.0942 | 0.7489 | 1.0589 | 0.1515 |
| LOC727805  | 0.9366 | 1.2472 | 1.0108 | 1.0413 | 1.0590 | 0.0665 |
| HIST1H3D   | 1.0876 | 1.1267 | 1.2251 | 0.7968 | 1.0590 | 0.0921 |
| SGCB       | 0.9687 | 1.1568 | 1.1696 | 0.9411 | 1.0591 | 0.0604 |
| MUM1L1     | 1.0819 | 1.0985 | 1.0968 | 0.9592 | 1.0591 | 0.0335 |
| ADCY6      | 1.1493 | 1.2258 | 0.9912 | 0.8703 | 1.0591 | 0.0797 |
| PSD3       | 0.9195 | 1.3935 | 1.0508 | 0.8727 | 1.0591 | 0.1177 |
| PNMA2      | 1.1255 | 1.1738 | 0.9523 | 0.9851 | 1.0592 | 0.0536 |
| IQCE       | 0.9922 | 1.2534 | 1.0434 | 0.9481 | 1.0593 | 0.0676 |
| ZNF496     | 1.1728 | 1.0072 | 0.9699 | 1.0873 | 1.0593 | 0.0451 |
| LOC441155  | 0.9581 | 1.3058 | 1.0616 | 0.9118 | 1.0594 | 0.0879 |
| RNF144     | 1.0492 | 1.4050 | 0.9633 | 0.8200 | 1.0594 | 0.1245 |
| LOC646672  | 1.0126 | 1.1440 | 1.3733 | 0.7076 | 1.0594 | 0.1389 |
| LOC645387  | 0.9599 | 1.1891 | 1.1988 | 0.8900 | 1.0595 | 0.0790 |
| TPT1       | 0.9870 | 1.2612 | 1.1561 | 0.8336 | 1.0595 | 0.0941 |
| CHIC2      | 0.8304 | 1.4126 | 1.1215 | 0.8735 | 1.0595 | 0.1340 |
| CIC        | 1.1918 | 1.2775 | 0.9451 | 0.8237 | 1.0595 | 0.1056 |
| SNORA7A    | 1.0904 | 1.2418 | 1.0291 | 0.8769 | 1.0595 | 0.0755 |

|            |        |        |        |        |        |        |
|------------|--------|--------|--------|--------|--------|--------|
| LOC220433  | 0.9506 | 1.2335 | 1.3589 | 0.6956 | 1.0597 | 0.1484 |
| LOC728857  | 1.1208 | 1.1052 | 1.1336 | 0.8791 | 1.0597 | 0.0605 |
| BRE        | 0.8983 | 1.5467 | 1.0428 | 0.7509 | 1.0597 | 0.1729 |
| THRSP      | 1.0031 | 1.2132 | 1.1521 | 0.8703 | 1.0597 | 0.0770 |
| LOC1001318 | 0.8710 | 1.2148 | 1.0830 | 1.0700 | 1.0597 | 0.0709 |
| MIR448     | 0.7990 | 1.4798 | 1.0516 | 0.9087 | 1.0598 | 0.1493 |
| C9orf96    | 1.0581 | 1.1147 | 1.0648 | 1.0014 | 1.0598 | 0.0232 |
| KCND2      | 1.1337 | 1.1387 | 1.0071 | 0.9597 | 1.0598 | 0.0452 |
| CADPS2     | 0.9881 | 1.2815 | 1.1117 | 0.8578 | 1.0598 | 0.0903 |
| TTYH3      | 1.1149 | 1.3459 | 1.0251 | 0.7534 | 1.0598 | 0.1224 |
| HDAC6      | 1.2350 | 1.2249 | 0.8978 | 0.8819 | 1.0599 | 0.0983 |
| LOC641751  | 1.1636 | 1.0629 | 1.1327 | 0.8806 | 1.0600 | 0.0634 |
| LOC646942  | 0.9684 | 1.4627 | 1.1000 | 0.7089 | 1.0600 | 0.1569 |
| ABHD10     | 0.9690 | 1.5014 | 1.0502 | 0.7197 | 1.0601 | 0.1631 |
| C20orf185  | 0.9566 | 1.2062 | 1.0359 | 1.0420 | 1.0602 | 0.0524 |
| XAGE1D     | 1.1219 | 1.0927 | 1.0687 | 0.9575 | 1.0602 | 0.0359 |
| CD55       | 1.0249 | 1.1383 | 1.3181 | 0.7596 | 1.0602 | 0.1170 |
| LOC1001297 | 1.1003 | 1.1405 | 1.0935 | 0.9066 | 1.0602 | 0.0523 |
| FLJ25996   | 0.9962 | 1.2279 | 1.0991 | 0.9180 | 1.0603 | 0.0670 |
| MAN2C1     | 0.9452 | 1.2753 | 1.1526 | 0.8684 | 1.0604 | 0.0935 |
| LOC791120  | 0.9981 | 1.6494 | 0.8611 | 0.7330 | 1.0604 | 0.2037 |
| C14orf50   | 0.9552 | 1.2188 | 1.0947 | 0.9731 | 1.0604 | 0.0612 |
| NCRNA00215 | 0.9174 | 1.4540 | 1.0367 | 0.8338 | 1.0605 | 0.1376 |
| CCDC93     | 1.0284 | 1.4105 | 1.0190 | 0.7842 | 1.0605 | 0.1296 |
| SLC14A1    | 0.9814 | 1.1148 | 1.1871 | 0.9591 | 1.0606 | 0.0544 |
| UBL5       | 0.9368 | 1.4080 | 1.1264 | 0.7715 | 1.0607 | 0.1366 |
| ZNF428     | 0.9904 | 1.5810 | 0.9242 | 0.7472 | 1.0607 | 0.1809 |
| FLJ41766   | 1.0679 | 1.2099 | 1.0328 | 0.9323 | 1.0607 | 0.0574 |
| PNLIP      | 0.9869 | 1.1727 | 1.1035 | 0.9800 | 1.0608 | 0.0468 |
| DNAJC25-GN | 0.9680 | 1.2452 | 1.1714 | 0.8586 | 1.0608 | 0.0893 |
| LOC729090  | 0.8141 | 1.5452 | 1.1669 | 0.7172 | 1.0608 | 0.1882 |
| LRGUK      | 1.0309 | 1.2041 | 1.0315 | 0.9769 | 1.0609 | 0.0494 |
| CBY3       | 1.0688 | 1.2061 | 1.0293 | 0.9395 | 1.0609 | 0.0555 |
| FLJ32154   | 0.9057 | 1.2622 | 1.0713 | 1.0046 | 1.0609 | 0.0752 |
| LOC1001327 | 0.7954 | 1.2330 | 1.1589 | 1.0564 | 1.0609 | 0.0956 |
| LRRC9      | 1.0574 | 1.0928 | 1.1228 | 0.9709 | 1.0610 | 0.0329 |
| KIAA1086   | 0.9740 | 1.1728 | 1.0415 | 1.0558 | 1.0610 | 0.0413 |
| LOC1001308 | 0.7812 | 1.3470 | 1.4595 | 0.6566 | 1.0611 | 0.2005 |
| LOC341604  | 1.0083 | 1.1438 | 1.1095 | 0.9828 | 1.0611 | 0.0388 |
| SC4MOL     | 0.7775 | 1.3635 | 1.4758 | 0.6277 | 1.0611 | 0.2105 |
| FAM38A     | 1.0328 | 1.5636 | 0.8879 | 0.7605 | 1.0612 | 0.1765 |
| BLCAP      | 0.9548 | 1.5584 | 1.0226 | 0.7090 | 1.0612 | 0.1789 |
| LOC652354  | 0.9984 | 1.1350 | 1.0996 | 1.0122 | 1.0613 | 0.0333 |
| C6orf221   | 0.9248 | 1.0814 | 1.1678 | 1.0713 | 1.0613 | 0.0504 |
| LOC440055  | 0.6625 | 1.4697 | 1.2343 | 0.8788 | 1.0613 | 0.1801 |
| KCTD2      | 1.0946 | 1.3340 | 0.8973 | 0.9194 | 1.0613 | 0.1010 |



|            |        |        |        |        |        |        |
|------------|--------|--------|--------|--------|--------|--------|
| JMJD2B     | 1.2007 | 1.1578 | 1.0788 | 0.8088 | 1.0615 | 0.0880 |
| HIST1H1D   | 1.0012 | 1.1608 | 1.1010 | 0.9831 | 1.0615 | 0.0420 |
| LOC649952  | 1.1092 | 1.0447 | 1.2128 | 0.8797 | 1.0616 | 0.0698 |
| MORN2      | 0.9783 | 1.5120 | 1.0041 | 0.7522 | 1.0617 | 0.1604 |
| KCNK17     | 0.9074 | 1.2897 | 1.0855 | 0.9642 | 1.0617 | 0.0846 |
| LOC653344  | 1.0130 | 1.6822 | 0.9133 | 0.6385 | 1.0617 | 0.2215 |
| CHRNB4     | 0.7668 | 1.3993 | 1.2133 | 0.8677 | 1.0618 | 0.1476 |
| TPD52      | 0.8800 | 1.4121 | 1.0854 | 0.8700 | 1.0619 | 0.1268 |
| C2Oorf43   | 0.8965 | 1.4357 | 1.1304 | 0.7849 | 1.0619 | 0.1439 |
| HKR1       | 0.9663 | 1.2620 | 1.1117 | 0.9076 | 1.0619 | 0.0793 |
| FLJ23834   | 0.9103 | 1.1338 | 1.2091 | 0.9947 | 1.0620 | 0.0673 |
| LOC652721  | 0.9925 | 1.2317 | 1.1303 | 0.8936 | 1.0620 | 0.0745 |
| DGCR11     | 0.8402 | 1.6539 | 0.9568 | 0.7973 | 1.0621 | 0.2001 |
| DEFB132    | 1.0707 | 1.1715 | 1.0651 | 0.9410 | 1.0621 | 0.0472 |
| MAP6D1     | 0.9913 | 1.2682 | 1.0810 | 0.9078 | 1.0621 | 0.0773 |
| LOC729967  | 1.0022 | 1.2038 | 1.0631 | 0.9792 | 1.0621 | 0.0505 |
| LOC648289  | 1.1110 | 1.0917 | 1.0638 | 0.9820 | 1.0621 | 0.0284 |
| BAT2       | 1.0175 | 1.4280 | 0.9543 | 0.8490 | 1.0622 | 0.1268 |
| OR51Q1     | 1.1077 | 1.0647 | 1.0492 | 1.0274 | 1.0623 | 0.0170 |
| CALCOCO1   | 1.1774 | 1.1443 | 1.0366 | 0.8908 | 1.0623 | 0.0646 |
| STOML1     | 1.0213 | 1.2666 | 1.0690 | 0.8922 | 1.0623 | 0.0777 |
| RXFP1      | 1.0834 | 1.1326 | 1.0637 | 0.9695 | 1.0623 | 0.0342 |
| ESPN       | 1.3005 | 0.9259 | 1.1393 | 0.8836 | 1.0623 | 0.0971 |
| LOC1001316 | 0.7892 | 1.2626 | 1.1338 | 1.0639 | 1.0624 | 0.0999 |
| ATP1B2     | 0.9093 | 1.4051 | 0.9677 | 0.9677 | 1.0624 | 0.1151 |
| FAM161B    | 1.0073 | 1.3348 | 1.0190 | 0.8889 | 1.0625 | 0.0954 |
| PI4KB      | 1.1015 | 1.3690 | 1.0130 | 0.7665 | 1.0625 | 0.1243 |
| PHLPP1     | 1.1072 | 1.3349 | 0.8647 | 0.9433 | 1.0625 | 0.1039 |
| LOC388720  | 1.0959 | 1.1425 | 1.1505 | 0.8616 | 1.0626 | 0.0681 |
| PI4K2A     | 0.9412 | 1.3450 | 1.1490 | 0.8155 | 1.0627 | 0.1166 |
| FURIN      | 1.0295 | 1.2952 | 1.0097 | 0.9165 | 1.0627 | 0.0813 |
| TDP1       | 0.9822 | 0.9888 | 1.4999 | 0.7800 | 1.0627 | 0.1536 |
| UCHL1      | 0.9803 | 1.3121 | 1.0624 | 0.8961 | 1.0627 | 0.0898 |
| PVRL2      | 1.0583 | 1.2651 | 1.0310 | 0.8969 | 1.0628 | 0.0761 |
| PRKAG3     | 1.0997 | 1.0889 | 0.9690 | 1.0938 | 1.0628 | 0.0313 |
| PSME2      | 0.9124 | 1.5939 | 0.9867 | 0.7584 | 1.0628 | 0.1833 |
| PATE2      | 0.9673 | 1.2381 | 1.1475 | 0.8984 | 1.0628 | 0.0786 |
| LOC642567  | 1.0162 | 1.1972 | 1.2041 | 0.8340 | 1.0629 | 0.0878 |
| RNF103     | 1.0902 | 1.4476 | 1.0499 | 0.6643 | 1.0630 | 0.1601 |
| SMA4       | 0.9497 | 1.5808 | 0.9918 | 0.7298 | 1.0630 | 0.1819 |
| UGCGL2     | 1.0172 | 1.4142 | 0.9716 | 0.8494 | 1.0631 | 0.1223 |
| LOC646037  | 0.9853 | 1.2848 | 1.0559 | 0.9265 | 1.0631 | 0.0785 |
| CNGB3      | 1.0620 | 1.1214 | 1.0935 | 0.9756 | 1.0631 | 0.0316 |
| HBXIP      | 1.0983 | 1.2886 | 1.0883 | 0.7774 | 1.0632 | 0.1058 |
| EXOC7      | 1.0373 | 1.3927 | 1.0564 | 0.7662 | 1.0632 | 0.1283 |
| RWDD2B     | 0.8871 | 1.3369 | 1.1873 | 0.8413 | 1.0632 | 0.1192 |

|             |        |        |        |        |        |        |
|-------------|--------|--------|--------|--------|--------|--------|
| ANKRD50     | 1.0454 | 1.1663 | 1.1192 | 0.9220 | 1.0632 | 0.0532 |
| FLII        | 1.0093 | 1.2489 | 1.1653 | 0.8295 | 1.0632 | 0.0924 |
| ARFGAP3     | 1.1283 | 1.4043 | 0.9333 | 0.7870 | 1.0632 | 0.1335 |
| PHKG2       | 0.9300 | 1.5538 | 0.9990 | 0.7702 | 1.0633 | 0.1704 |
| TMEM49      | 1.0212 | 1.3637 | 1.1383 | 0.7299 | 1.0633 | 0.1319 |
| LOC643961   | 1.1566 | 1.1680 | 1.1255 | 0.8033 | 1.0633 | 0.0872 |
| HIST1H1C    | 0.9581 | 1.2494 | 1.3987 | 0.6472 | 1.0634 | 0.1662 |
| ELF2        | 0.9034 | 1.4587 | 1.1230 | 0.7684 | 1.0634 | 0.1507 |
| LOC387885   | 0.9749 | 1.0617 | 1.2199 | 0.9971 | 1.0634 | 0.0553 |
| RNF43       | 1.1163 | 1.1699 | 1.1391 | 0.8284 | 1.0634 | 0.0791 |
| PACSIN1     | 1.0922 | 1.3900 | 1.0270 | 0.7444 | 1.0634 | 0.1325 |
| DKFZp434J1C | 1.1669 | 1.1014 | 1.0276 | 0.9578 | 1.0634 | 0.0453 |
| LOC652793   | 1.0216 | 1.0937 | 1.2063 | 0.9325 | 1.0635 | 0.0579 |
| LOC729339   | 0.9932 | 1.1807 | 1.2310 | 0.8493 | 1.0635 | 0.0878 |
| RABEP2      | 1.0568 | 1.1770 | 1.1013 | 0.9192 | 1.0636 | 0.0541 |
| ABCA7       | 1.1284 | 1.1612 | 1.0649 | 0.9000 | 1.0636 | 0.0581 |
| POU4F2      | 1.0195 | 1.1934 | 0.9907 | 1.0511 | 1.0637 | 0.0450 |
| SNX4        | 0.9151 | 1.2958 | 1.3080 | 0.7365 | 1.0639 | 0.1422 |
| RND1        | 1.1011 | 1.1567 | 1.0197 | 0.9781 | 1.0639 | 0.0401 |
| LOC1001328  | 1.1026 | 1.1460 | 1.0693 | 0.9379 | 1.0639 | 0.0448 |
| OSMR        | 1.0129 | 1.2111 | 1.0340 | 0.9978 | 1.0639 | 0.0496 |
| KLF4        | 1.0238 | 1.1660 | 1.2078 | 0.8584 | 1.0640 | 0.0790 |
| AGA         | 1.0383 | 1.3449 | 1.1423 | 0.7305 | 1.0640 | 0.1281 |
| PTPRK       | 1.0018 | 1.2556 | 1.0258 | 0.9730 | 1.0640 | 0.0648 |
| NALP5       | 1.0567 | 1.0974 | 1.0747 | 1.0275 | 1.0641 | 0.0148 |
| CYP2A6      | 1.1843 | 1.0252 | 1.1298 | 0.9170 | 1.0641 | 0.0591 |
| LOC727874   | 0.9874 | 1.1555 | 1.1070 | 1.0072 | 1.0643 | 0.0401 |
| RARB        | 1.1060 | 1.2006 | 1.0827 | 0.8679 | 1.0643 | 0.0702 |
| LOC647850   | 1.0051 | 1.1409 | 1.0917 | 1.0194 | 1.0643 | 0.0318 |
| KAL1        | 1.0289 | 1.0237 | 1.1831 | 1.0217 | 1.0644 | 0.0396 |
| C11orf52    | 1.1746 | 1.4250 | 0.8971 | 0.7609 | 1.0644 | 0.1478 |
| LOC728226   | 1.0590 | 1.1464 | 1.1620 | 0.8902 | 1.0644 | 0.0623 |
| LOC644315   | 1.0325 | 1.2916 | 1.1908 | 0.7427 | 1.0644 | 0.1198 |
| PPM1F       | 1.0002 | 1.4715 | 1.0210 | 0.7649 | 1.0644 | 0.1476 |
| ZNF654      | 0.9411 | 1.2741 | 1.1920 | 0.8505 | 1.0644 | 0.1005 |
| TCP10L      | 0.9604 | 1.1801 | 1.2065 | 0.9109 | 1.0644 | 0.0753 |
| MIR216B     | 0.8967 | 1.2061 | 1.1500 | 1.0050 | 1.0645 | 0.0702 |
| RTN3        | 0.9177 | 1.4798 | 1.0379 | 0.8224 | 1.0645 | 0.1453 |
| ZNF518B     | 0.9728 | 1.5301 | 0.9562 | 0.7988 | 1.0645 | 0.1601 |
| GNPTAB      | 0.9160 | 1.3805 | 1.1505 | 0.8114 | 1.0646 | 0.1269 |
| ORM1        | 1.4100 | 1.1646 | 0.9228 | 0.7612 | 1.0646 | 0.1419 |
| LOC643731   | 0.9252 | 1.1429 | 1.1430 | 1.0479 | 1.0648 | 0.0516 |
| LOC644914   | 1.0239 | 1.4135 | 1.0110 | 0.8107 | 1.0648 | 0.1261 |
| LOC1001284  | 1.0158 | 1.1073 | 1.0984 | 1.0377 | 1.0648 | 0.0225 |
| LOC652501   | 1.0117 | 1.1521 | 1.0534 | 1.0420 | 1.0648 | 0.0304 |
| CD2AP       | 0.8708 | 1.3971 | 1.2141 | 0.7775 | 1.0649 | 0.1452 |

|            |        |        |        |        |        |        |
|------------|--------|--------|--------|--------|--------|--------|
| LOC1001329 | 0.8798 | 1.2983 | 1.2355 | 0.8460 | 1.0649 | 0.1175 |
| GUCA2A     | 1.1180 | 1.0692 | 1.1208 | 0.9515 | 1.0649 | 0.0396 |
| TGFA       | 0.9738 | 1.3117 | 1.1738 | 0.8002 | 1.0649 | 0.1122 |
| LOC1001326 | 1.0345 | 1.2149 | 1.0801 | 0.9302 | 1.0649 | 0.0590 |
| LOC149501  | 0.9760 | 1.3812 | 1.1238 | 0.7788 | 1.0649 | 0.1269 |
| LOC728069  | 1.0025 | 1.6384 | 0.9997 | 0.6192 | 1.0649 | 0.2113 |
| TCERG1L    | 1.0170 | 1.1634 | 1.0908 | 0.9888 | 1.0650 | 0.0392 |
| DCDC2B     | 0.9844 | 1.0456 | 1.1066 | 1.1237 | 1.0651 | 0.0317 |
| LRRN1      | 1.1507 | 1.1314 | 1.1128 | 0.8659 | 1.0652 | 0.0669 |
| DPCR1      | 1.1374 | 1.1192 | 1.1004 | 0.9040 | 1.0652 | 0.0543 |
| RAPGEF1    | 0.9226 | 1.3611 | 1.0865 | 0.8907 | 1.0652 | 0.1075 |
| PNPLA6     | 0.9685 | 1.4847 | 0.9910 | 0.8169 | 1.0653 | 0.1451 |
| CST2       | 1.0774 | 1.2157 | 0.9956 | 0.9724 | 1.0653 | 0.0550 |
| LYPLAL1    | 0.9535 | 1.4593 | 1.2105 | 0.6378 | 1.0653 | 0.1760 |
| C9orf125   | 0.9901 | 1.2505 | 1.1235 | 0.8971 | 1.0653 | 0.0773 |
| LOC643815  | 0.9680 | 1.2728 | 0.8355 | 1.1850 | 1.0653 | 0.0999 |
| DAGLB      | 0.9326 | 1.4296 | 1.1117 | 0.7876 | 1.0654 | 0.1383 |
| LOC440295  | 1.0596 | 1.0922 | 1.1479 | 0.9617 | 1.0654 | 0.0391 |
| DDX42      | 1.0350 | 1.4105 | 1.0493 | 0.7668 | 1.0654 | 0.1321 |
| LOC284230  | 1.0405 | 1.3567 | 1.1032 | 0.7614 | 1.0654 | 0.1222 |
| MIR639     | 0.8419 | 1.3993 | 0.9649 | 1.0557 | 1.0655 | 0.1196 |
| MIR491     | 1.0290 | 1.2331 | 1.1627 | 0.8372 | 1.0655 | 0.0871 |
| RAB3IP     | 0.9190 | 1.5509 | 1.0395 | 0.7528 | 1.0655 | 0.1721 |
| CAMTA1     | 0.9306 | 1.2889 | 1.1756 | 0.8671 | 1.0656 | 0.0998 |
| ZMYND8     | 0.9346 | 1.5385 | 1.0032 | 0.7863 | 1.0656 | 0.1640 |
| POM121C    | 0.9353 | 1.4275 | 1.2019 | 0.6981 | 1.0657 | 0.1585 |
| TMEM129    | 0.9623 | 1.5120 | 0.9332 | 0.8556 | 1.0658 | 0.1504 |
| PRMT2      | 1.0871 | 1.3050 | 1.0764 | 0.7946 | 1.0658 | 0.1046 |
| TRIM56     | 0.9806 | 1.2544 | 1.1535 | 0.8749 | 1.0658 | 0.0851 |
| AARS2      | 0.8988 | 1.4406 | 1.0398 | 0.8841 | 1.0658 | 0.1298 |
| SPG11      | 1.0379 | 1.4524 | 0.9800 | 0.7930 | 1.0658 | 0.1390 |
| ADAM10     | 0.9093 | 1.5138 | 1.0482 | 0.7924 | 1.0659 | 0.1582 |
| LOC651337  | 1.1969 | 1.0658 | 1.1090 | 0.8920 | 1.0659 | 0.0641 |
| FRS3       | 0.9453 | 1.5999 | 0.8910 | 0.8275 | 1.0659 | 0.1796 |
| PIN4       | 1.0106 | 1.1797 | 1.2550 | 0.8185 | 1.0659 | 0.0970 |
| PANX2      | 0.9948 | 1.3365 | 1.1006 | 0.8318 | 1.0659 | 0.1058 |
| GPR176     | 1.0015 | 1.3972 | 0.9478 | 0.9174 | 1.0660 | 0.1118 |
| FXYD3      | 1.0178 | 1.2490 | 1.0457 | 0.9513 | 1.0660 | 0.0641 |
| FAM174A    | 0.8898 | 1.4500 | 1.0569 | 0.8672 | 1.0660 | 0.1348 |
| NMNAT2     | 1.0739 | 1.2912 | 1.0783 | 0.8206 | 1.0660 | 0.0962 |
| LOC729616  | 1.0090 | 1.2356 | 0.9646 | 1.0551 | 1.0661 | 0.0594 |
| LOC651959  | 1.0425 | 1.2137 | 1.0715 | 0.9369 | 1.0661 | 0.0570 |
| LOC392425  | 1.0265 | 1.0680 | 1.1795 | 0.9908 | 1.0662 | 0.0409 |
| C19orf56   | 0.8266 | 1.7100 | 0.9350 | 0.7931 | 1.0662 | 0.2167 |
| GSS        | 1.0760 | 1.5029 | 1.0070 | 0.6791 | 1.0662 | 0.1693 |
| C12orf71   | 1.0256 | 1.2802 | 1.1092 | 0.8501 | 1.0663 | 0.0894 |

|            |        |        |        |        |        |        |
|------------|--------|--------|--------|--------|--------|--------|
| SIGLEC9    | 1.0744 | 1.1967 | 0.9362 | 1.0579 | 1.0663 | 0.0533 |
| LOC389101  | 0.9905 | 1.1851 | 1.2188 | 0.8708 | 1.0663 | 0.0823 |
| AP2A1      | 0.8932 | 1.3988 | 1.0809 | 0.8925 | 1.0663 | 0.1194 |
| EIF3L      | 0.9895 | 1.5169 | 1.0227 | 0.7365 | 1.0664 | 0.1632 |
| ZNF346     | 0.9988 | 1.2834 | 0.9891 | 0.9942 | 1.0664 | 0.0724 |
| PCDHB18    | 1.1098 | 1.0909 | 1.0980 | 0.9670 | 1.0664 | 0.0334 |
| FLJ20972   | 1.2028 | 1.1647 | 0.9726 | 0.9257 | 1.0664 | 0.0688 |
| LOC401019  | 1.0202 | 1.2344 | 1.1103 | 0.9010 | 1.0665 | 0.0705 |
| ATP5J      | 1.0301 | 1.4161 | 1.0583 | 0.7614 | 1.0665 | 0.1344 |
| RBM5       | 1.0708 | 1.4671 | 1.0350 | 0.6932 | 1.0665 | 0.1583 |
| MIR1974    | 0.7626 | 1.3845 | 1.3254 | 0.7938 | 1.0666 | 0.1671 |
| IVD        | 0.8157 | 1.5117 | 1.2534 | 0.6857 | 1.0666 | 0.1917 |
| C6orf106   | 1.0489 | 1.3132 | 1.0265 | 0.8779 | 1.0666 | 0.0905 |
| C14orf124  | 0.8557 | 1.7880 | 0.9558 | 0.6672 | 1.0667 | 0.2478 |
| CLEC2L     | 0.7520 | 1.4585 | 1.0626 | 0.9942 | 1.0668 | 0.1466 |
| LOC1001306 | 0.9189 | 1.2771 | 1.3145 | 0.7571 | 1.0669 | 0.1364 |
| OGFOD2     | 1.1352 | 1.1151 | 1.1364 | 0.8816 | 1.0671 | 0.0620 |
| LOC642077  | 0.9521 | 1.3535 | 1.0855 | 0.8774 | 1.0671 | 0.1047 |
| KCNJ13     | 1.0166 | 1.1690 | 1.1724 | 0.9105 | 1.0671 | 0.0636 |
| LOC728903  | 0.9084 | 1.1614 | 1.2346 | 0.9646 | 1.0672 | 0.0778 |
| EIF4G3     | 0.9970 | 1.5775 | 1.0351 | 0.6595 | 1.0673 | 0.1899 |
| PRPF19     | 1.0038 | 1.3453 | 1.1912 | 0.7289 | 1.0673 | 0.1327 |
| LOC1001280 | 1.0741 | 1.2289 | 1.0057 | 0.9608 | 1.0674 | 0.0587 |
| SOX9       | 1.0225 | 1.3178 | 0.9427 | 0.9867 | 1.0674 | 0.0851 |
| LOC729466  | 1.0006 | 1.3474 | 1.1250 | 0.7969 | 1.0675 | 0.1152 |
| LUM        | 0.9620 | 1.3341 | 1.1455 | 0.8285 | 1.0675 | 0.1101 |
| MUCL1      | 1.0162 | 1.1141 | 1.1917 | 0.9482 | 1.0676 | 0.0536 |
| NMNAT1     | 0.9405 | 1.3113 | 1.2137 | 0.8048 | 1.0676 | 0.1176 |
| PLXNA1     | 1.0348 | 1.3742 | 0.9746 | 0.8871 | 1.0677 | 0.1066 |
| LOC642153  | 1.0307 | 1.2020 | 1.0609 | 0.9773 | 1.0677 | 0.0480 |
| LOC653284  | 1.0835 | 1.1430 | 1.1604 | 0.8844 | 1.0678 | 0.0633 |
| CREB3L4    | 1.1169 | 1.4012 | 1.0068 | 0.7464 | 1.0678 | 0.1356 |
| LOC1001313 | 0.9508 | 1.3104 | 1.3314 | 0.6787 | 1.0678 | 0.1564 |
| D4S234E    | 1.1208 | 1.3029 | 0.9965 | 0.8514 | 1.0679 | 0.0957 |
| LOC642357  | 0.8601 | 1.4233 | 1.0947 | 0.8937 | 1.0679 | 0.1293 |
| MNDA       | 1.1644 | 1.2410 | 1.0818 | 0.7851 | 1.0680 | 0.0998 |
| CCDC26     | 0.9620 | 1.0817 | 1.1185 | 1.1102 | 1.0681 | 0.0362 |
| TESK2      | 1.1239 | 1.3685 | 0.9816 | 0.7983 | 1.0681 | 0.1203 |
| NADK       | 1.1695 | 1.3183 | 1.0009 | 0.7839 | 1.0681 | 0.1148 |
| ROMO1      | 1.0568 | 1.4436 | 1.0741 | 0.6984 | 1.0682 | 0.1522 |
| LOC646819  | 0.8251 | 1.3252 | 1.4450 | 0.6776 | 1.0682 | 0.1870 |
| LOC1001346 | 1.0938 | 1.2497 | 1.0174 | 0.9123 | 1.0683 | 0.0710 |
| LOC652455  | 1.0119 | 1.3245 | 1.1549 | 0.7820 | 1.0683 | 0.1148 |
| SNX15      | 0.9778 | 1.3457 | 1.0652 | 0.8847 | 1.0683 | 0.0995 |
| MIR106A    | 0.8564 | 1.2406 | 1.2115 | 0.9649 | 1.0684 | 0.0939 |
| C2orf68    | 1.0993 | 1.1703 | 1.0500 | 0.9541 | 1.0684 | 0.0454 |

|             |        |        |        |        |        |        |
|-------------|--------|--------|--------|--------|--------|--------|
| RNF146      | 0.8815 | 1.5239 | 1.1082 | 0.7606 | 1.0686 | 0.1680 |
| PPM1D       | 1.0338 | 1.1585 | 1.2440 | 0.8379 | 1.0686 | 0.0882 |
| ASXL1       | 1.0101 | 1.4041 | 1.0534 | 0.8070 | 1.0687 | 0.1240 |
| LOC389223   | 0.8163 | 1.4803 | 1.0727 | 0.9056 | 1.0687 | 0.1471 |
| CCDC148     | 0.9266 | 1.2807 | 1.1241 | 0.9436 | 1.0687 | 0.0836 |
| PRPF40B     | 1.0478 | 1.2078 | 1.1472 | 0.8724 | 1.0688 | 0.0733 |
| EXOC3       | 0.9401 | 1.3653 | 1.0762 | 0.8939 | 1.0689 | 0.1061 |
| MYBPC2      | 0.9433 | 1.2421 | 1.1348 | 0.9554 | 1.0689 | 0.0725 |
| LOC1001342  | 1.0327 | 1.1219 | 1.1701 | 0.9512 | 1.0690 | 0.0485 |
| AKAP13      | 1.0738 | 1.3709 | 0.9772 | 0.8540 | 1.0690 | 0.1102 |
| SNTG1       | 1.0155 | 1.2026 | 1.0681 | 0.9897 | 1.0690 | 0.0474 |
| FOLH1       | 1.1158 | 1.2177 | 1.2658 | 0.6769 | 1.0690 | 0.1344 |
| NCAN        | 0.9387 | 1.4667 | 1.0207 | 0.8503 | 1.0691 | 0.1370 |
| GCHFR       | 1.2067 | 1.4825 | 0.9029 | 0.6843 | 1.0691 | 0.1745 |
| KLKP1       | 1.1324 | 1.2254 | 0.9934 | 0.9253 | 1.0691 | 0.0676 |
| ETV1        | 0.9865 | 1.1647 | 1.1498 | 0.9756 | 1.0692 | 0.0510 |
| C1orf227    | 0.9756 | 1.1639 | 1.1912 | 0.9461 | 1.0692 | 0.0631 |
| PFAAP5      | 1.0624 | 1.2681 | 1.1548 | 0.7918 | 1.0693 | 0.1016 |
| DCBLD2      | 0.9977 | 1.2795 | 1.0504 | 0.9500 | 1.0694 | 0.0730 |
| PRKCH       | 1.1113 | 1.4672 | 0.9529 | 0.7464 | 1.0694 | 0.1522 |
| SCARNA21    | 0.9395 | 1.2306 | 1.1570 | 0.9507 | 1.0695 | 0.0734 |
| LOC127295   | 0.8754 | 1.4099 | 1.2120 | 0.7806 | 1.0695 | 0.1464 |
| RNF145      | 0.9611 | 1.4440 | 1.1019 | 0.7714 | 1.0696 | 0.1420 |
| RNU1A3      | 1.1460 | 1.1188 | 1.1906 | 0.8230 | 1.0696 | 0.0835 |
| ZNF317      | 0.9677 | 1.4308 | 1.0947 | 0.7852 | 1.0696 | 0.1361 |
| STON1-GTF2. | 1.1609 | 1.0612 | 1.1432 | 0.9133 | 1.0696 | 0.0565 |
| PPL         | 1.0922 | 1.2106 | 1.0814 | 0.8944 | 1.0696 | 0.0653 |
| LOC642678   | 0.8248 | 1.3395 | 1.1323 | 0.9820 | 1.0696 | 0.1097 |
| C1orf161    | 1.0698 | 1.1971 | 1.1278 | 0.8840 | 1.0697 | 0.0671 |
| SLC25A37    | 0.9191 | 1.5374 | 0.9662 | 0.8561 | 1.0697 | 0.1575 |
| LOC731985   | 0.6851 | 1.5631 | 1.2513 | 0.7799 | 1.0698 | 0.2058 |
| TSR2        | 0.9357 | 1.5593 | 1.0183 | 0.7662 | 1.0699 | 0.1714 |
| MYO1D       | 1.1910 | 1.1973 | 1.0210 | 0.8706 | 1.0700 | 0.0780 |
| SDSL        | 0.9805 | 1.4342 | 1.1913 | 0.6742 | 1.0700 | 0.1613 |
| ABCC8       | 0.9639 | 1.3739 | 1.0640 | 0.8783 | 1.0700 | 0.1082 |
| SRR         | 1.0398 | 1.3225 | 1.1345 | 0.7836 | 1.0701 | 0.1121 |
| TMPRSS6     | 0.9489 | 1.2755 | 1.1717 | 0.8845 | 1.0701 | 0.0920 |
| LOC728247   | 1.0487 | 1.0594 | 1.1129 | 1.0597 | 1.0702 | 0.0145 |
| C2orf49     | 1.0247 | 1.2091 | 1.2241 | 0.8229 | 1.0702 | 0.0941 |
| EDN1        | 0.9086 | 1.1917 | 1.1218 | 1.0588 | 1.0702 | 0.0603 |
| NOV         | 1.0191 | 1.1390 | 1.2630 | 0.8599 | 1.0703 | 0.0860 |
| CNR1        | 1.0741 | 1.0695 | 1.1894 | 0.9480 | 1.0703 | 0.0493 |
| LOC729009   | 1.0768 | 1.1899 | 1.3964 | 0.6182 | 1.0703 | 0.1646 |
| ZNF490      | 1.0892 | 1.2317 | 0.9990 | 0.9615 | 1.0703 | 0.0601 |
| SNX16       | 0.9788 | 1.2488 | 1.1939 | 0.8599 | 1.0704 | 0.0912 |
| LOC642989   | 0.7815 | 1.4089 | 1.5459 | 0.5450 | 1.0704 | 0.2416 |

|            |        |        |        |        |        |        |
|------------|--------|--------|--------|--------|--------|--------|
| PHC1       | 0.9457 | 1.2306 | 1.1819 | 0.9232 | 1.0704 | 0.0792 |
| RDH16      | 0.9782 | 1.1742 | 1.1225 | 1.0066 | 1.0704 | 0.0466 |
| FAM104A    | 0.8867 | 1.3838 | 1.2894 | 0.7218 | 1.0704 | 0.1585 |
| FAM55C     | 0.9429 | 1.4436 | 1.0383 | 0.8570 | 1.0704 | 0.1298 |
| LOC731501  | 0.9649 | 1.3648 | 1.1029 | 0.8493 | 1.0704 | 0.1110 |
| CBX7       | 0.9860 | 1.4585 | 1.0106 | 0.8269 | 1.0705 | 0.1356 |
| LOC644058  | 0.9859 | 1.2369 | 1.0507 | 1.0084 | 1.0705 | 0.0571 |
| ARMCX3     | 0.8784 | 1.4899 | 1.0404 | 0.8735 | 1.0706 | 0.1451 |
| LOC646703  | 0.9907 | 1.1330 | 1.1303 | 1.0284 | 1.0706 | 0.0361 |
| C14orf153  | 0.8198 | 1.4278 | 1.2366 | 0.7985 | 1.0707 | 0.1560 |
| GGT7       | 1.0036 | 1.2239 | 1.1159 | 0.9397 | 1.0708 | 0.0627 |
| JARID1A    | 0.8376 | 1.6110 | 1.0731 | 0.7614 | 1.0708 | 0.1919 |
| LOC645683  | 1.1029 | 1.2905 | 1.0297 | 0.8602 | 1.0708 | 0.0891 |
| ALAD       | 0.9418 | 1.4355 | 1.0770 | 0.8290 | 1.0709 | 0.1317 |
| GEMIN7     | 0.9092 | 1.2850 | 1.0514 | 1.0379 | 1.0709 | 0.0782 |
| LOC646254  | 1.0635 | 1.0648 | 1.0783 | 1.0770 | 1.0709 | 0.0039 |
| C11orf74   | 0.8575 | 1.3630 | 1.0810 | 0.9822 | 1.0709 | 0.1076 |
| KDM3B      | 0.8599 | 1.7483 | 0.9274 | 0.7482 | 1.0709 | 0.2288 |
| ZZZ3       | 1.0555 | 1.4536 | 1.0655 | 0.7092 | 1.0709 | 0.1521 |
| ARHGEF3    | 0.9999 | 1.2356 | 1.1535 | 0.8949 | 1.0710 | 0.0764 |
| LOC652458  | 1.1862 | 1.2949 | 0.9949 | 0.8081 | 1.0710 | 0.1074 |
| SYTL2      | 0.9982 | 1.3152 | 1.1283 | 0.8431 | 1.0712 | 0.1001 |
| GREB1      | 1.1101 | 1.1240 | 1.0273 | 1.0236 | 1.0712 | 0.0266 |
| LOC1001295 | 1.0026 | 1.2750 | 1.1430 | 0.8644 | 1.0712 | 0.0886 |
| LOC1001315 | 0.9616 | 1.0159 | 1.3386 | 0.9689 | 1.0712 | 0.0899 |
| RHOBTB3    | 0.9318 | 1.3697 | 1.0427 | 0.9407 | 1.0713 | 0.1026 |
| POLR3C     | 0.8088 | 1.6601 | 1.0502 | 0.7660 | 1.0713 | 0.2060 |
| LRCH4      | 1.1509 | 1.2994 | 0.9823 | 0.8526 | 1.0713 | 0.0975 |
| VLDLR      | 1.2173 | 1.2497 | 0.9224 | 0.8960 | 1.0714 | 0.0940 |
| CA9        | 1.0364 | 1.1093 | 1.0778 | 1.0619 | 1.0714 | 0.0153 |
| FLJ31568   | 1.1231 | 1.2971 | 1.0255 | 0.8401 | 1.0714 | 0.0954 |
| LOC402694  | 0.8481 | 1.4725 | 1.2672 | 0.6980 | 1.0715 | 0.1799 |
| C2orf40    | 0.9573 | 1.2048 | 1.2286 | 0.8952 | 1.0715 | 0.0849 |
| ATP7A      | 0.9858 | 1.3723 | 0.9897 | 0.9382 | 1.0715 | 0.1009 |
| HSD17B7    | 1.1017 | 1.5271 | 0.9653 | 0.6926 | 1.0717 | 0.1740 |
| EPHA6      | 1.0796 | 1.2127 | 1.1247 | 0.8697 | 1.0717 | 0.0728 |
| LCOR       | 1.1314 | 1.2973 | 1.1828 | 0.6755 | 1.0717 | 0.1365 |
| SMG1       | 1.0472 | 1.4222 | 1.0631 | 0.7544 | 1.0718 | 0.1367 |
| LRRC23     | 1.1407 | 1.2141 | 1.0343 | 0.8983 | 1.0719 | 0.0686 |
| HCN4       | 1.0593 | 1.1504 | 1.0861 | 0.9916 | 1.0719 | 0.0329 |
| LOC649431  | 1.1239 | 1.2212 | 0.9625 | 0.9802 | 1.0720 | 0.0615 |
| SPANXN4    | 1.0466 | 1.1078 | 1.1169 | 1.0167 | 1.0720 | 0.0241 |
| FAM82A2    | 1.0410 | 1.4732 | 0.9974 | 0.7767 | 1.0721 | 0.1457 |
| C17orf45   | 0.7854 | 1.5806 | 1.2127 | 0.7096 | 1.0721 | 0.2025 |
| RPS6P1     | 0.8219 | 1.2026 | 1.5672 | 0.6967 | 1.0721 | 0.1970 |
| LOC648390  | 0.9023 | 1.4662 | 1.1424 | 0.7776 | 1.0721 | 0.1516 |

|            |        |        |        |        |        |        |
|------------|--------|--------|--------|--------|--------|--------|
| MTMR3      | 1.1435 | 1.2595 | 1.1306 | 0.7550 | 1.0721 | 0.1096 |
| LOC641738  | 0.9056 | 1.2476 | 1.0892 | 1.0463 | 1.0722 | 0.0704 |
| LMF2       | 1.2396 | 1.2565 | 1.0393 | 0.7537 | 1.0723 | 0.1171 |
| RHPN1      | 1.0370 | 1.1907 | 1.1775 | 0.8839 | 1.0723 | 0.0718 |
| NXPH2      | 1.0467 | 1.1593 | 1.1444 | 0.9393 | 1.0724 | 0.0509 |
| TMEM127    | 0.9857 | 1.3459 | 1.0270 | 0.9313 | 1.0725 | 0.0932 |
| KIAA0319L  | 1.0346 | 1.3274 | 1.1228 | 0.8054 | 1.0726 | 0.1081 |
| DEFB124    | 1.0915 | 1.1813 | 1.0188 | 0.9989 | 1.0726 | 0.0413 |
| CD63       | 0.9451 | 1.4329 | 1.1412 | 0.7719 | 1.0728 | 0.1418 |
| LOC1001337 | 0.9445 | 1.2861 | 1.1808 | 0.8800 | 1.0729 | 0.0961 |
| ZCCHC14    | 1.0506 | 1.5063 | 0.9417 | 0.7932 | 1.0729 | 0.1538 |
| SERTAD1    | 0.9599 | 1.4440 | 0.9965 | 0.8916 | 1.0730 | 0.1256 |
| TTY15      | 1.0013 | 1.3944 | 1.0250 | 0.8719 | 1.0731 | 0.1122 |
| FBN1       | 0.9650 | 1.1838 | 1.1650 | 0.9788 | 1.0732 | 0.0586 |
| LOC648993  | 0.9011 | 1.2860 | 1.1719 | 0.9337 | 1.0732 | 0.0931 |
| LOC387825  | 1.1390 | 1.2763 | 1.1380 | 0.7394 | 1.0732 | 0.1159 |
| CMTM6      | 1.0522 | 1.4017 | 1.0975 | 0.7417 | 1.0732 | 0.1350 |
| SNX29      | 1.1001 | 1.4677 | 0.8543 | 0.8711 | 1.0733 | 0.1429 |
| FOXD4L3    | 1.1114 | 1.1762 | 1.0853 | 0.9204 | 1.0733 | 0.0544 |
| LOC652672  | 1.0668 | 1.4246 | 1.0866 | 0.7153 | 1.0733 | 0.1448 |
| SCAMP4     | 1.0988 | 1.2509 | 1.0294 | 0.9144 | 1.0734 | 0.0704 |
| LOC1001347 | 1.0443 | 1.2656 | 1.1699 | 0.8146 | 1.0736 | 0.0975 |
| C5orf35    | 0.8640 | 1.4048 | 1.2276 | 0.7982 | 1.0736 | 0.1452 |
| ERO1L      | 0.9274 | 1.4657 | 1.0965 | 0.8050 | 1.0736 | 0.1437 |
| TRPV6      | 1.0130 | 1.3014 | 1.1707 | 0.8096 | 1.0737 | 0.1059 |
| SNORD114-2 | 0.9642 | 1.2003 | 1.1098 | 1.0205 | 1.0737 | 0.0517 |
| HOTAIR     | 1.1169 | 1.0508 | 1.0639 | 1.0638 | 1.0738 | 0.0147 |
| SHOC2      | 1.0448 | 1.4309 | 1.1251 | 0.6947 | 1.0739 | 0.1513 |
| NFIB       | 1.0656 | 1.3680 | 1.0426 | 0.8200 | 1.0741 | 0.1126 |
| PROS1      | 1.0295 | 1.5166 | 0.9528 | 0.7973 | 1.0741 | 0.1552 |
| EYA3       | 0.9976 | 1.2661 | 1.1178 | 0.9150 | 1.0741 | 0.0763 |
| CREBBP     | 1.0842 | 1.4051 | 1.0427 | 0.7645 | 1.0741 | 0.1312 |
| PARK7      | 0.9167 | 1.6134 | 0.9622 | 0.8044 | 1.0742 | 0.1828 |
| POU2F1     | 1.0819 | 1.3317 | 0.9498 | 0.9336 | 1.0743 | 0.0920 |
| CLU1       | 1.0504 | 1.1323 | 1.1599 | 0.9545 | 1.0743 | 0.0462 |
| OR1N2      | 1.1083 | 1.1398 | 1.0505 | 0.9988 | 1.0743 | 0.0312 |
| ATXN1L     | 1.1246 | 1.2145 | 1.0386 | 0.9196 | 1.0743 | 0.0629 |
| ALPPL2     | 0.9724 | 1.1373 | 1.2686 | 0.9191 | 1.0744 | 0.0797 |
| LOC1001286 | 0.9726 | 1.1561 | 1.1462 | 1.0230 | 1.0745 | 0.0455 |
| CNTNAP3    | 1.0402 | 1.2474 | 1.0863 | 0.9241 | 1.0745 | 0.0670 |
| HERPUD1    | 1.0306 | 1.4786 | 1.0134 | 0.7756 | 1.0746 | 0.1467 |
| IFI6       | 0.8397 | 1.5261 | 1.1909 | 0.7418 | 1.0746 | 0.1787 |
| OR7G3      | 1.1045 | 1.1593 | 1.0992 | 0.9357 | 1.0747 | 0.0483 |
| CCL24      | 1.0206 | 1.2824 | 1.0060 | 0.9903 | 1.0748 | 0.0695 |
| TBRG1      | 0.8994 | 1.4820 | 1.1270 | 0.7910 | 1.0749 | 0.1527 |
| LOC651308  | 0.9805 | 1.2683 | 1.2543 | 0.7967 | 1.0749 | 0.1140 |

|            |        |        |        |        |        |        |
|------------|--------|--------|--------|--------|--------|--------|
| LOC647086  | 1.0331 | 1.2712 | 1.0950 | 0.9006 | 1.0750 | 0.0769 |
| LOC1001306 | 1.0357 | 1.3896 | 1.1054 | 0.7693 | 1.0750 | 0.1274 |
| FAM126B    | 0.8957 | 1.4913 | 1.0689 | 0.8442 | 1.0750 | 0.1468 |
| PLRG1      | 0.8893 | 1.5686 | 1.1138 | 0.7287 | 1.0751 | 0.1825 |
| COMMD1     | 0.8457 | 1.3131 | 1.2045 | 0.9374 | 1.0752 | 0.1099 |
| LOC729236  | 0.8634 | 1.4466 | 1.2000 | 0.7907 | 1.0752 | 0.1526 |
| DAG1       | 1.1081 | 1.4398 | 1.0222 | 0.7307 | 1.0752 | 0.1459 |
| PIGT       | 0.9851 | 1.6248 | 0.9824 | 0.7088 | 1.0753 | 0.1943 |
| ZNF837     | 1.1619 | 1.4211 | 0.8981 | 0.8201 | 1.0753 | 0.1365 |
| ARD1B      | 1.0366 | 1.0531 | 1.0686 | 1.1430 | 1.0753 | 0.0235 |
| LOC1001323 | 0.8423 | 1.1783 | 1.3173 | 0.9637 | 1.0754 | 0.1064 |
| SERF2      | 1.1947 | 1.2382 | 1.1130 | 0.7558 | 1.0754 | 0.1096 |
| PPP1R2     | 0.9986 | 1.5331 | 1.0319 | 0.7383 | 1.0755 | 0.1661 |
| FAM129A    | 1.1318 | 1.3037 | 1.0388 | 0.8280 | 1.0756 | 0.0991 |
| FLJ43663   | 1.0792 | 1.0808 | 1.1468 | 0.9961 | 1.0757 | 0.0309 |
| RBCK1      | 0.9348 | 1.5297 | 1.0502 | 0.7884 | 1.0758 | 0.1605 |
| ACTR1A     | 0.9728 | 1.5745 | 0.9940 | 0.7619 | 1.0758 | 0.1743 |
| SHRM       | 0.8949 | 1.6118 | 1.1468 | 0.6499 | 1.0758 | 0.2054 |
| NDUFA4     | 0.9822 | 1.2952 | 1.2537 | 0.7726 | 1.0759 | 0.1226 |
| RRM2B      | 0.8715 | 1.5909 | 1.1043 | 0.7371 | 1.0760 | 0.1876 |
| GOLGB1     | 1.0706 | 1.4356 | 0.9960 | 0.8020 | 1.0760 | 0.1325 |
| FLJ40125   | 1.0469 | 1.1664 | 1.1111 | 0.9801 | 1.0761 | 0.0402 |
| CRKL       | 1.0502 | 1.5979 | 1.0193 | 0.6371 | 1.0761 | 0.1977 |
| ERCC-00162 | 1.0645 | 1.1404 | 1.1252 | 0.9747 | 1.0762 | 0.0376 |
| GFER       | 1.0113 | 1.0229 | 1.3056 | 0.9651 | 1.0762 | 0.0775 |
| LOC653111  | 1.1444 | 1.3581 | 0.9700 | 0.8325 | 1.0763 | 0.1136 |
| C17orf91   | 1.0577 | 1.3336 | 0.9657 | 0.9484 | 1.0763 | 0.0890 |
| RPS4Y1     | 1.0208 | 1.3349 | 1.1637 | 0.7861 | 1.0764 | 0.1161 |
| CRABP1     | 1.0505 | 1.2332 | 1.0292 | 0.9929 | 1.0764 | 0.0536 |
| KRT82      | 0.9614 | 1.1823 | 1.1350 | 1.0271 | 1.0765 | 0.0503 |
| PHYHIP     | 1.0760 | 1.1335 | 1.1617 | 0.9346 | 1.0765 | 0.0505 |
| LOC653623  | 0.9387 | 1.3235 | 1.1150 | 0.9287 | 1.0765 | 0.0928 |
| HIATL2     | 0.7606 | 1.7792 | 0.9544 | 0.8122 | 1.0766 | 0.2378 |
| TPMT       | 0.9774 | 1.3855 | 1.1133 | 0.8301 | 1.0766 | 0.1181 |
| FLJ14712   | 0.9261 | 1.2893 | 1.1538 | 0.9373 | 1.0766 | 0.0882 |
| LOC651713  | 1.0449 | 1.2381 | 1.1620 | 0.8619 | 1.0767 | 0.0819 |
| EID2       | 0.9188 | 1.6582 | 0.9990 | 0.7310 | 1.0767 | 0.2018 |
| LOC645045  | 0.9613 | 1.2754 | 1.2084 | 0.8619 | 1.0767 | 0.0984 |
| MIR369     | 0.9134 | 1.4266 | 1.0153 | 0.9519 | 1.0768 | 0.1185 |
| MOV10      | 1.3027 | 1.3550 | 0.8780 | 0.7716 | 1.0768 | 0.1475 |
| GNPTG      | 1.0025 | 1.4745 | 1.0291 | 0.8012 | 1.0768 | 0.1420 |
| NOXA1      | 0.9421 | 1.3147 | 1.0675 | 0.9831 | 1.0769 | 0.0835 |
| FAM110A    | 1.0403 | 1.4798 | 1.0556 | 0.7318 | 1.0769 | 0.1536 |
| LOC151760  | 0.9794 | 1.1706 | 1.2204 | 0.9374 | 1.0770 | 0.0697 |
| CYB5RL     | 1.0327 | 1.3165 | 1.0410 | 0.9178 | 1.0770 | 0.0846 |
| MORG1      | 0.8940 | 1.3727 | 1.1917 | 0.8504 | 1.0772 | 0.1243 |



|            |        |        |        |        |        |        |
|------------|--------|--------|--------|--------|--------|--------|
| MAP4K4     | 1.0731 | 1.3049 | 1.0696 | 0.8614 | 1.0772 | 0.0906 |
| RPL5       | 0.7853 | 1.3470 | 1.4848 | 0.6922 | 1.0773 | 0.1984 |
| RPS8       | 0.9958 | 1.3181 | 1.1363 | 0.8593 | 1.0774 | 0.0982 |
| LOC1001330 | 1.0460 | 1.2225 | 1.1259 | 0.9151 | 1.0774 | 0.0650 |
| TCF7L2     | 0.9990 | 1.1084 | 1.2490 | 0.9532 | 1.0774 | 0.0658 |
| LOC1001324 | 1.0840 | 1.1806 | 1.0325 | 1.0131 | 1.0775 | 0.0375 |
| CMTM8      | 1.0518 | 1.3826 | 1.1129 | 0.7632 | 1.0776 | 0.1271 |
| MAP1B      | 0.9651 | 1.4196 | 1.0115 | 0.9143 | 1.0777 | 0.1157 |
| FLOT1      | 1.0564 | 1.6347 | 0.9135 | 0.7061 | 1.0777 | 0.1991 |
| FAM105A    | 1.1038 | 1.3676 | 0.9576 | 0.8822 | 1.0778 | 0.1070 |
| LOC643278  | 0.9438 | 1.2669 | 1.1052 | 0.9953 | 1.0778 | 0.0715 |
| SELP       | 1.0635 | 1.1736 | 1.1196 | 0.9548 | 1.0779 | 0.0468 |
| KPNA6      | 0.9362 | 1.5197 | 0.9831 | 0.8728 | 1.0780 | 0.1490 |
| CCDC130    | 0.9750 | 1.5125 | 0.9494 | 0.8750 | 1.0780 | 0.1464 |
| MDGA1      | 1.1260 | 1.2616 | 1.0806 | 0.8438 | 1.0780 | 0.0870 |
| SMPDL3A    | 0.9020 | 1.3936 | 1.1121 | 0.9045 | 1.0780 | 0.1161 |
| MALT1      | 1.0789 | 1.2786 | 1.1467 | 0.8080 | 1.0780 | 0.0991 |
| SMS        | 1.1960 | 1.5495 | 0.8940 | 0.6727 | 1.0781 | 0.1902 |
| TMPRSS11E2 | 0.9468 | 1.1325 | 1.3000 | 0.9331 | 1.0781 | 0.0868 |
| ZNF30      | 0.9690 | 1.3483 | 1.1488 | 0.8466 | 1.0782 | 0.1094 |
| ST3GAL3    | 1.0624 | 1.4293 | 0.9626 | 0.8589 | 1.0783 | 0.1242 |
| RNF130     | 0.9902 | 1.3117 | 1.2697 | 0.7418 | 1.0784 | 0.1330 |
| TPD52L2    | 1.0310 | 1.3766 | 1.0603 | 0.8456 | 1.0784 | 0.1102 |
| CTSD       | 0.9969 | 1.4489 | 1.1176 | 0.7503 | 1.0784 | 0.1452 |
| A2ML1      | 1.0322 | 1.0990 | 1.1134 | 1.0691 | 1.0784 | 0.0180 |
| UTRN       | 0.8819 | 1.2485 | 1.2701 | 0.9137 | 1.0785 | 0.1047 |
| KYNU       | 0.9782 | 1.2072 | 1.2143 | 0.9147 | 1.0786 | 0.0774 |
| LOC647784  | 1.0550 | 1.2968 | 1.1304 | 0.8325 | 1.0787 | 0.0964 |
| LOC644863  | 0.9546 | 1.4837 | 1.1337 | 0.7431 | 1.0788 | 0.1568 |
| PFKM       | 0.8693 | 1.7136 | 1.0425 | 0.6897 | 1.0788 | 0.2235 |
| SETD3      | 0.9769 | 1.4200 | 1.0346 | 0.8836 | 1.0788 | 0.1179 |
| LOC1001297 | 1.0380 | 1.3431 | 1.0994 | 0.8349 | 1.0788 | 0.1046 |
| CCDC104    | 1.0183 | 1.3209 | 1.1969 | 0.7793 | 1.0789 | 0.1176 |
| TRIM38     | 1.0441 | 1.2780 | 1.1188 | 0.8747 | 1.0789 | 0.0837 |
| LOC285741  | 0.8714 | 1.2303 | 1.5064 | 0.7076 | 1.0789 | 0.1795 |
| HUWE1      | 0.9454 | 1.4143 | 1.0208 | 0.9356 | 1.0790 | 0.1134 |
| HDGF2      | 1.1038 | 1.3135 | 0.9887 | 0.9103 | 1.0791 | 0.0877 |
| TNFSF4     | 1.0888 | 1.2878 | 1.0527 | 0.8873 | 1.0791 | 0.0822 |
| SNORA59A   | 0.9867 | 1.3382 | 1.1323 | 0.8595 | 1.0792 | 0.1028 |
| LOC442160  | 1.0215 | 1.1455 | 1.1724 | 0.9774 | 1.0792 | 0.0472 |
| LOC285900  | 0.9502 | 1.3701 | 1.2192 | 0.7776 | 1.0793 | 0.1329 |
| FTHL7      | 1.0296 | 1.3935 | 1.1029 | 0.7912 | 1.0793 | 0.1241 |
| ZNF33A     | 1.0344 | 1.3209 | 1.1206 | 0.8413 | 1.0793 | 0.0995 |
| LOC648392  | 0.9679 | 1.2492 | 1.1377 | 0.9626 | 1.0793 | 0.0697 |
| OSTF1      | 0.7794 | 1.5850 | 1.1702 | 0.7828 | 1.0793 | 0.1919 |
| ARHGDI1A   | 0.8622 | 1.5495 | 1.1292 | 0.7764 | 1.0793 | 0.1738 |

|             |        |        |        |        |        |        |
|-------------|--------|--------|--------|--------|--------|--------|
| PCDHB17     | 1.0142 | 1.3482 | 1.0258 | 0.9292 | 1.0794 | 0.0922 |
| C20orf12    | 1.0880 | 1.1313 | 1.1386 | 0.9599 | 1.0794 | 0.0414 |
| LOC732381   | 0.8467 | 1.1471 | 1.3037 | 1.0203 | 1.0795 | 0.0968 |
| PTK2B       | 1.0586 | 1.4087 | 1.0457 | 0.8050 | 1.0795 | 0.1243 |
| LOC649049   | 0.9306 | 1.4085 | 1.1621 | 0.8169 | 1.0795 | 0.1311 |
| TRIM53      | 1.1554 | 1.1711 | 1.1209 | 0.8709 | 1.0796 | 0.0703 |
| WDR33       | 0.9480 | 1.4771 | 1.1413 | 0.7525 | 1.0797 | 0.1544 |
| TFDP2       | 0.9174 | 1.6246 | 0.9763 | 0.8008 | 1.0798 | 0.1852 |
| LOC653773   | 1.0029 | 1.1287 | 1.4352 | 0.7528 | 1.0799 | 0.1419 |
| ZNF436      | 1.0575 | 1.3561 | 1.0686 | 0.8382 | 1.0801 | 0.1062 |
| PLA2G5      | 1.1196 | 1.1715 | 1.0865 | 0.9430 | 1.0802 | 0.0489 |
| ZFP106      | 1.1153 | 1.5711 | 0.8746 | 0.7600 | 1.0803 | 0.1796 |
| LOC643358   | 0.8495 | 1.5708 | 1.2217 | 0.6802 | 1.0806 | 0.1987 |
| LOC1001295  | 0.9985 | 1.2778 | 1.1990 | 0.8470 | 1.0806 | 0.0976 |
| SRGAP3      | 1.0478 | 1.3909 | 1.0593 | 0.8244 | 1.0806 | 0.1167 |
| FAM166A     | 0.9852 | 1.2323 | 1.1843 | 0.9208 | 1.0806 | 0.0755 |
| LOC651202   | 0.9138 | 1.2711 | 1.4547 | 0.6834 | 1.0807 | 0.1737 |
| RAB32       | 1.1160 | 1.3743 | 1.0664 | 0.7666 | 1.0809 | 0.1246 |
| FAM113A     | 1.0951 | 1.2048 | 1.1652 | 0.8584 | 1.0809 | 0.0776 |
| LOC651123   | 1.0419 | 1.2375 | 1.1139 | 0.9306 | 1.0809 | 0.0644 |
| LOC650812   | 0.9734 | 1.3787 | 1.1311 | 0.8405 | 1.0809 | 0.1157 |
| ZFP36       | 0.8888 | 1.4839 | 1.1170 | 0.8340 | 1.0809 | 0.1476 |
| LOC728453   | 1.0465 | 1.3540 | 1.1043 | 0.8191 | 1.0810 | 0.1099 |
| ABCA2       | 1.0277 | 1.4028 | 1.0138 | 0.8796 | 1.0810 | 0.1124 |
| RBM9        | 0.8713 | 1.5109 | 1.0979 | 0.8445 | 1.0812 | 0.1541 |
| CBLL1       | 1.0212 | 1.4711 | 1.0808 | 0.7516 | 1.0812 | 0.1484 |
| LOC642677   | 0.9591 | 1.3176 | 1.0133 | 1.0352 | 1.0813 | 0.0804 |
| LOC389404   | 0.9040 | 1.2864 | 1.2830 | 0.8522 | 1.0814 | 0.1179 |
| SOS1        | 1.0912 | 1.1021 | 1.1714 | 0.9611 | 1.0814 | 0.0439 |
| LOC654191   | 1.0777 | 1.4007 | 1.0124 | 0.8352 | 1.0815 | 0.1181 |
| POLR2C      | 0.9734 | 1.3509 | 1.2098 | 0.7920 | 1.0815 | 0.1240 |
| LOC646347   | 1.2010 | 1.4673 | 0.8667 | 0.7916 | 1.0816 | 0.1563 |
| GABARAPL2   | 0.9885 | 1.5107 | 1.0589 | 0.7685 | 1.0817 | 0.1558 |
| ZFP28       | 1.0152 | 1.3014 | 1.1004 | 0.9099 | 1.0817 | 0.0829 |
| LOC728671   | 0.9587 | 1.3257 | 1.1954 | 0.8477 | 1.0819 | 0.1089 |
| ANKHD1-EIF4 | 1.1167 | 1.4195 | 0.9522 | 0.8393 | 1.0819 | 0.1261 |
| CACNA1B     | 0.9983 | 1.1307 | 1.1414 | 1.0577 | 1.0820 | 0.0335 |
| RPL23       | 0.9270 | 1.3294 | 1.4649 | 0.6072 | 1.0821 | 0.1952 |
| EEF2        | 1.0168 | 1.4024 | 1.0858 | 0.8244 | 1.0824 | 0.1202 |
| ANKRD24     | 1.0497 | 1.2530 | 1.0743 | 0.9530 | 1.0825 | 0.0626 |
| C16orf45    | 0.9030 | 1.3685 | 1.2037 | 0.8550 | 1.0825 | 0.1226 |
| ACRV1       | 0.9966 | 1.2736 | 1.1383 | 0.9219 | 1.0826 | 0.0779 |
| COG1        | 1.0109 | 1.3070 | 1.1418 | 0.8710 | 1.0827 | 0.0930 |
| LOC729859   | 0.9045 | 1.2673 | 1.3736 | 0.7854 | 1.0827 | 0.1411 |
| TRIM4       | 0.9651 | 1.6805 | 0.9144 | 0.7720 | 1.0830 | 0.2033 |
| LOC727865   | 0.9156 | 1.4149 | 1.2827 | 0.7193 | 1.0831 | 0.1608 |

|            |        |        |        |        |        |        |
|------------|--------|--------|--------|--------|--------|--------|
| C9         | 1.0243 | 1.1955 | 1.0722 | 1.0406 | 1.0832 | 0.0388 |
| DDO        | 1.0192 | 1.3120 | 1.1576 | 0.8440 | 1.0832 | 0.0997 |
| NSBP1      | 0.9776 | 1.3666 | 1.2497 | 0.7398 | 1.0834 | 0.1406 |
| LOC651966  | 1.0254 | 1.2433 | 1.0893 | 0.9758 | 1.0835 | 0.0581 |
| NCK2       | 1.0422 | 1.2242 | 1.1991 | 0.8686 | 1.0835 | 0.0822 |
| S100A11    | 1.0852 | 1.2522 | 1.2444 | 0.7524 | 1.0835 | 0.1169 |
| LOC648851  | 1.0135 | 1.3155 | 1.0080 | 0.9981 | 1.0838 | 0.0773 |
| SNORA8     | 1.1423 | 1.3749 | 1.0386 | 0.7796 | 1.0838 | 0.1234 |
| CSAG3B     | 0.8712 | 1.6282 | 1.0790 | 0.7570 | 1.0839 | 0.1933 |
| LOC1001324 | 0.9529 | 1.5014 | 1.0768 | 0.8044 | 1.0839 | 0.1499 |
| LOC1001307 | 0.9779 | 1.2133 | 0.9336 | 1.2108 | 1.0839 | 0.0745 |
| SORBS2     | 0.9907 | 1.3023 | 1.2176 | 0.8252 | 1.0839 | 0.1085 |
| TCHHL1     | 1.0370 | 1.1601 | 1.1375 | 1.0013 | 1.0840 | 0.0384 |
| LOC400027  | 0.9607 | 1.6388 | 0.9865 | 0.7500 | 1.0840 | 0.1924 |
| CLIC1      | 1.1085 | 1.5627 | 0.9844 | 0.6808 | 1.0841 | 0.1831 |
| HSZFP36    | 0.9640 | 1.4634 | 1.1188 | 0.7904 | 1.0841 | 0.1431 |
| ARMC7      | 1.1312 | 1.4427 | 0.9788 | 0.7840 | 1.0842 | 0.1390 |
| RAP2A      | 0.8896 | 1.4544 | 1.2260 | 0.7669 | 1.0842 | 0.1570 |
| C14orf143  | 0.8873 | 1.3081 | 1.3794 | 0.7620 | 1.0842 | 0.1527 |
| ZFYVE26    | 1.0502 | 1.5689 | 0.8715 | 0.8465 | 1.0843 | 0.1678 |
| WWC3       | 1.0125 | 1.4284 | 1.0496 | 0.8466 | 1.0843 | 0.1229 |
| CHODL      | 0.9043 | 1.3599 | 1.1190 | 0.9540 | 1.0843 | 0.1027 |
| SMYD3      | 1.0036 | 1.4114 | 1.2952 | 0.6270 | 1.0843 | 0.1749 |
| KLHDC10    | 1.0991 | 1.3062 | 1.0903 | 0.8417 | 1.0843 | 0.0950 |
| EVI5L      | 1.1958 | 1.4551 | 0.9785 | 0.7083 | 1.0844 | 0.1588 |
| YPEL3      | 1.0693 | 1.3958 | 1.0584 | 0.8142 | 1.0844 | 0.1193 |
| RPS9       | 0.9495 | 1.5127 | 1.0769 | 0.7989 | 1.0845 | 0.1536 |
| PRMT6      | 1.0724 | 1.4695 | 1.0684 | 0.7278 | 1.0845 | 0.1516 |
| LOC651537  | 1.0288 | 1.2026 | 1.0783 | 1.0287 | 1.0846 | 0.0410 |
| PHF21A     | 0.9085 | 1.6360 | 0.9387 | 0.8554 | 1.0847 | 0.1846 |
| LOC1001345 | 1.0365 | 1.1852 | 1.1432 | 0.9741 | 1.0847 | 0.0484 |
| LOC650922  | 0.8522 | 0.7893 | 1.1143 | 1.5833 | 1.0848 | 0.1805 |
| BBS12      | 1.0526 | 1.2384 | 1.1641 | 0.8845 | 1.0849 | 0.0769 |
| SEMG2      | 1.0712 | 1.1556 | 1.0770 | 1.0358 | 1.0849 | 0.0253 |
| PCYOX1     | 0.9311 | 1.3974 | 1.2736 | 0.7383 | 1.0851 | 0.1520 |
| HOXA5      | 1.0569 | 1.3981 | 1.0559 | 0.8296 | 1.0851 | 0.1172 |
| LOC653147  | 1.0812 | 1.4084 | 1.1407 | 0.7103 | 1.0852 | 0.1438 |
| NUP54      | 0.9282 | 1.3051 | 1.4768 | 0.6312 | 1.0853 | 0.1898 |
| MON2       | 1.0758 | 1.3850 | 1.0836 | 0.7974 | 1.0855 | 0.1200 |
| CTBS       | 0.9989 | 1.4884 | 1.1101 | 0.7447 | 1.0855 | 0.1545 |
| TMEM93     | 1.0000 | 1.4145 | 1.1802 | 0.7476 | 1.0856 | 0.1410 |
| PTPLA      | 0.8681 | 1.5651 | 1.1102 | 0.7995 | 1.0857 | 0.1731 |
| GAL3ST4    | 0.9267 | 1.1017 | 1.3147 | 1.0000 | 1.0858 | 0.0843 |
| PPDPF      | 0.9721 | 1.5767 | 0.9508 | 0.8435 | 1.0858 | 0.1660 |
| LOC646399  | 1.2044 | 1.1349 | 1.0776 | 0.9262 | 1.0858 | 0.0592 |
| APPBP2     | 1.0645 | 1.3400 | 1.1418 | 0.7969 | 1.0858 | 0.1124 |

|           |        |        |        |        |        |        |
|-----------|--------|--------|--------|--------|--------|--------|
| ECOP      | 1.0892 | 1.3077 | 1.1060 | 0.8403 | 1.0858 | 0.0957 |
| ZNF45     | 1.0982 | 1.2602 | 1.1412 | 0.8436 | 1.0858 | 0.0877 |
| CASC1     | 1.0186 | 1.2915 | 1.1078 | 0.9257 | 1.0859 | 0.0780 |
| C21orf57  | 1.0954 | 1.4042 | 1.0428 | 0.8013 | 1.0859 | 0.1239 |
| FLJ23584  | 1.0376 | 1.4237 | 1.0095 | 0.8730 | 1.0859 | 0.1182 |
| PPM1B     | 1.0185 | 1.3390 | 1.1424 | 0.8440 | 1.0860 | 0.1042 |
| EOMES     | 1.0907 | 1.2621 | 1.0713 | 0.9203 | 1.0861 | 0.0699 |
| FEM1C     | 1.0976 | 1.3708 | 1.2181 | 0.6583 | 1.0862 | 0.1532 |
| FRMD6     | 1.0634 | 1.2419 | 1.1084 | 0.9311 | 1.0862 | 0.0641 |
| C2orf64   | 1.0115 | 1.4587 | 1.1547 | 0.7199 | 1.0862 | 0.1536 |
| LOC653241 | 1.2249 | 1.1615 | 0.9512 | 1.0075 | 1.0863 | 0.0641 |
| GTF2IRD2P | 1.0822 | 1.2282 | 1.0535 | 0.9818 | 1.0864 | 0.0518 |
| UBA7      | 1.0720 | 1.2315 | 1.1267 | 0.9155 | 1.0864 | 0.0659 |
| XDH       | 1.0507 | 1.1241 | 1.3479 | 0.8233 | 1.0865 | 0.1081 |
| LOC647311 | 1.0701 | 1.1182 | 1.1714 | 0.9867 | 1.0866 | 0.0392 |
| SIK3      | 0.9963 | 1.4865 | 1.1966 | 0.6672 | 1.0867 | 0.1723 |
| P4HB      | 1.2462 | 1.2927 | 0.9678 | 0.8399 | 1.0867 | 0.1091 |
| KIAA1715  | 1.0416 | 1.4135 | 1.0098 | 0.8818 | 1.0867 | 0.1143 |
| LOC344382 | 1.0976 | 1.2523 | 1.0840 | 0.9129 | 1.0867 | 0.0694 |
| SUPT4H1   | 1.0057 | 1.6052 | 0.9565 | 0.7794 | 1.0867 | 0.1795 |
| CDS2      | 1.0461 | 1.3657 | 1.0939 | 0.8413 | 1.0867 | 0.1079 |
| FAM160A2  | 1.1337 | 1.3530 | 0.9958 | 0.8650 | 1.0869 | 0.1043 |
| C20orf108 | 0.9407 | 1.2259 | 1.4255 | 0.7555 | 1.0869 | 0.1487 |
| SLC20A2   | 0.7721 | 1.5358 | 1.2695 | 0.7706 | 1.0870 | 0.1902 |
| PICK1     | 1.0243 | 1.6043 | 0.9676 | 0.7523 | 1.0871 | 0.1821 |
| C1orf59   | 0.9283 | 1.5171 | 1.0991 | 0.8041 | 1.0871 | 0.1556 |
| PBX2      | 1.2053 | 1.4203 | 0.9203 | 0.8029 | 1.0872 | 0.1395 |
| LOC388339 | 0.9492 | 1.1580 | 1.5327 | 0.7089 | 1.0872 | 0.1746 |
| CDH1      | 1.0281 | 1.4212 | 1.0846 | 0.8153 | 1.0873 | 0.1255 |
| HOXC4     | 1.1457 | 1.2962 | 1.0248 | 0.8828 | 1.0874 | 0.0879 |
| RAB11FIP3 | 1.0585 | 1.4307 | 1.0472 | 0.8134 | 1.0875 | 0.1276 |
| ZNF823    | 0.9532 | 1.6228 | 1.0460 | 0.7282 | 1.0875 | 0.1905 |
| GFM1      | 1.1028 | 1.3792 | 1.1580 | 0.7106 | 1.0876 | 0.1391 |
| C17orf44  | 0.9640 | 1.2158 | 1.2733 | 0.8977 | 1.0877 | 0.0923 |
| LOC644189 | 1.1204 | 1.0830 | 1.0523 | 1.0950 | 1.0877 | 0.0141 |
| LRP10     | 1.0811 | 1.2923 | 1.2527 | 0.7249 | 1.0877 | 0.1293 |
| LOC729912 | 1.0801 | 1.1940 | 1.1041 | 0.9731 | 1.0878 | 0.0454 |
| ZCCHC6    | 0.8435 | 1.3254 | 1.2249 | 0.9582 | 1.0880 | 0.1124 |
| GOLGA2    | 1.1872 | 1.3872 | 1.0102 | 0.7674 | 1.0880 | 0.1317 |
| SLC23A1   | 0.9983 | 1.2854 | 1.1377 | 0.9307 | 1.0880 | 0.0786 |
| CTNNBIP1  | 1.1389 | 1.3290 | 0.9488 | 0.9356 | 1.0881 | 0.0928 |
| MIDN      | 1.0147 | 1.4391 | 1.1183 | 0.7803 | 1.0881 | 0.1367 |
| PLA1A     | 1.0216 | 1.3751 | 1.1116 | 0.8440 | 1.0881 | 0.1107 |
| DDIT4L    | 1.0013 | 1.6758 | 1.0554 | 0.6202 | 1.0882 | 0.2185 |
| LOC646483 | 0.6750 | 1.5283 | 1.1447 | 1.0048 | 1.0882 | 0.1767 |
| RPL37A    | 1.0054 | 1.4297 | 1.0938 | 0.8241 | 1.0882 | 0.1269 |

|            |        |        |        |        |        |        |
|------------|--------|--------|--------|--------|--------|--------|
| C9orf16    | 0.8685 | 1.5480 | 1.1222 | 0.8148 | 1.0884 | 0.1672 |
| RSBN1      | 0.9705 | 1.4729 | 1.1435 | 0.7670 | 1.0885 | 0.1495 |
| MGEA5      | 1.0088 | 1.4629 | 1.1185 | 0.7639 | 1.0885 | 0.1451 |
| IGF2BP2    | 0.9810 | 1.3409 | 1.1917 | 0.8407 | 1.0886 | 0.1108 |
| AASS       | 1.0497 | 1.3158 | 1.1667 | 0.8222 | 1.0886 | 0.1042 |
| TAPBP      | 1.0677 | 1.4327 | 0.9975 | 0.8571 | 1.0887 | 0.1227 |
| EP300      | 0.9845 | 1.4559 | 0.9912 | 0.9237 | 1.0888 | 0.1233 |
| TMPRSS13   | 1.0882 | 1.2170 | 1.1124 | 0.9378 | 1.0888 | 0.0576 |
| KLHL20     | 0.9285 | 1.4732 | 1.1787 | 0.7751 | 1.0889 | 0.1527 |
| COL6A1     | 1.0939 | 1.5195 | 0.9213 | 0.8212 | 1.0890 | 0.1542 |
| LOC651436  | 1.0906 | 1.4470 | 1.0607 | 0.7576 | 1.0890 | 0.1411 |
| FAM50B     | 0.8924 | 1.5050 | 1.0730 | 0.8859 | 1.0891 | 0.1453 |
| LOC402251  | 0.9129 | 1.4885 | 1.2780 | 0.6770 | 1.0891 | 0.1817 |
| TBXAS1     | 0.9952 | 1.1709 | 1.1288 | 1.0615 | 1.0891 | 0.0386 |
| LOC648294  | 1.2346 | 1.2304 | 1.1275 | 0.7641 | 1.0891 | 0.1111 |
| PLXNB3     | 1.1062 | 1.2863 | 1.0311 | 0.9331 | 1.0892 | 0.0746 |
| PIK4CA     | 1.0381 | 1.4949 | 1.0851 | 0.7388 | 1.0893 | 0.1555 |
| DTNA       | 0.9574 | 1.2905 | 1.2166 | 0.8930 | 1.0894 | 0.0969 |
| LOC400304  | 0.8970 | 1.2636 | 1.2797 | 0.9180 | 1.0896 | 0.1053 |
| C2orf62    | 1.0589 | 1.2325 | 1.2019 | 0.8655 | 1.0897 | 0.0838 |
| ROPN1L     | 1.0083 | 1.3158 | 1.1044 | 0.9308 | 1.0898 | 0.0833 |
| PIP3-E     | 0.9587 | 1.1827 | 1.2794 | 0.9385 | 1.0898 | 0.0840 |
| DLG4       | 1.1104 | 1.1788 | 1.1010 | 0.9692 | 1.0899 | 0.0438 |
| TOP1P2     | 0.8990 | 1.1705 | 1.3926 | 0.8973 | 1.0899 | 0.1196 |
| STRN3      | 0.8710 | 1.6297 | 1.0504 | 0.8093 | 1.0901 | 0.1870 |
| LPHN1      | 1.0749 | 1.4899 | 1.0187 | 0.7774 | 1.0902 | 0.1480 |
| ZSWIM4     | 1.1080 | 1.3430 | 1.0598 | 0.8502 | 1.0903 | 0.1011 |
| C3orf18    | 1.1820 | 1.2110 | 1.1083 | 0.8598 | 1.0903 | 0.0798 |
| ACSL1      | 1.1185 | 1.1355 | 1.4225 | 0.6850 | 1.0904 | 0.1521 |
| CCNH       | 0.8357 | 1.6006 | 1.1591 | 0.7661 | 1.0904 | 0.1904 |
| AKR1D1     | 0.9228 | 1.6096 | 1.1250 | 0.7043 | 1.0904 | 0.1932 |
| RNF165     | 1.0269 | 1.1882 | 1.1311 | 1.0156 | 1.0904 | 0.0417 |
| SLC25A25   | 0.9617 | 1.4838 | 1.1748 | 0.7415 | 1.0905 | 0.1582 |
| CADM1      | 1.0193 | 1.3165 | 1.2032 | 0.8231 | 1.0905 | 0.1082 |
| LOC1001337 | 1.1380 | 1.3222 | 0.9823 | 0.9199 | 1.0906 | 0.0898 |
| SNORA59B   | 0.9467 | 1.2058 | 1.3283 | 0.8818 | 1.0906 | 0.1057 |
| ZNF131     | 0.7323 | 1.6680 | 1.1427 | 0.8198 | 1.0907 | 0.2117 |
| BTD        | 0.9721 | 1.3937 | 1.2687 | 0.7284 | 1.0907 | 0.1497 |
| LOC1001283 | 0.9328 | 1.4776 | 1.0798 | 0.8731 | 1.0908 | 0.1360 |
| XPR1       | 1.0892 | 1.4424 | 1.0964 | 0.7354 | 1.0909 | 0.1443 |
| LOC651149  | 0.8083 | 1.5024 | 1.3325 | 0.7203 | 1.0909 | 0.1925 |
| PRSS23     | 0.9908 | 1.2848 | 1.1664 | 0.9216 | 1.0909 | 0.0827 |
| LOC284428  | 1.1570 | 1.2050 | 1.0493 | 0.9526 | 1.0909 | 0.0565 |
| FAM149B1   | 1.0830 | 1.3436 | 1.1563 | 0.7810 | 1.0910 | 0.1170 |
| PECI       | 0.9938 | 1.3434 | 1.3823 | 0.6445 | 1.0910 | 0.1726 |
| GPR177     | 1.0601 | 1.6048 | 0.9612 | 0.7379 | 1.0910 | 0.1841 |

|            |        |        |        |        |        |        |
|------------|--------|--------|--------|--------|--------|--------|
| LOC728661  | 1.1194 | 1.5031 | 1.0302 | 0.7115 | 1.0911 | 0.1629 |
| COX17      | 1.0515 | 1.4762 | 1.0479 | 0.7891 | 1.0912 | 0.1423 |
| TMBIM4     | 0.9140 | 1.5047 | 1.0686 | 0.8774 | 1.0912 | 0.1439 |
| ZNF431     | 0.9568 | 1.1899 | 1.2947 | 0.9232 | 1.0912 | 0.0901 |
| RNF20      | 1.0564 | 1.2463 | 1.2624 | 0.7997 | 1.0912 | 0.1078 |
| BANK1      | 1.0115 | 1.2457 | 1.1902 | 0.9175 | 1.0912 | 0.0765 |
| KIAA1217   | 0.9859 | 1.2896 | 1.2382 | 0.8512 | 1.0912 | 0.1040 |
| CASZ1      | 1.0837 | 1.3394 | 1.0738 | 0.8682 | 1.0913 | 0.0965 |
| LOC1001317 | 0.9035 | 1.5156 | 1.1566 | 0.7901 | 1.0914 | 0.1608 |
| CBFA2T2    | 1.0558 | 1.3771 | 1.0391 | 0.8939 | 1.0915 | 0.1019 |
| EFCAB4A    | 1.1578 | 1.4586 | 0.9725 | 0.7772 | 1.0915 | 0.1450 |
| DNAH7      | 0.9642 | 1.0519 | 1.2547 | 1.0956 | 1.0916 | 0.0608 |
| LOC646753  | 0.9679 | 1.5192 | 1.1154 | 0.7642 | 1.0917 | 0.1597 |
| LOC1001295 | 1.1872 | 1.3353 | 1.0951 | 0.7492 | 1.0917 | 0.1244 |
| FSTL1      | 1.0924 | 1.3820 | 1.0000 | 0.8927 | 1.0918 | 0.1050 |
| LOC729272  | 1.1330 | 1.1577 | 1.1498 | 0.9267 | 1.0918 | 0.0553 |
| RPS20      | 0.9839 | 1.4034 | 1.1471 | 0.8333 | 1.0919 | 0.1220 |
| MIA3       | 1.1049 | 1.3194 | 1.0501 | 0.8936 | 1.0920 | 0.0880 |
| DAAM1      | 1.0918 | 1.3583 | 1.1267 | 0.7912 | 1.0920 | 0.1164 |
| ST6GALNAC1 | 1.0511 | 1.4016 | 1.1525 | 0.7630 | 1.0920 | 0.1321 |
| LOC1001308 | 0.9439 | 1.4622 | 1.1446 | 0.8179 | 1.0922 | 0.1405 |
| EHBP1      | 0.9953 | 1.3691 | 1.2518 | 0.7525 | 1.0922 | 0.1375 |
| BCHE       | 0.9177 | 1.3709 | 1.3530 | 0.7272 | 1.0922 | 0.1606 |
| LOC729458  | 1.0921 | 1.2746 | 1.0336 | 0.9687 | 1.0923 | 0.0658 |
| ATF3       | 1.0100 | 1.4337 | 1.0776 | 0.8478 | 1.0923 | 0.1236 |
| PIAS1      | 0.9518 | 1.5541 | 1.0144 | 0.8487 | 1.0923 | 0.1577 |
| FAM110B    | 1.0949 | 1.2995 | 1.1420 | 0.8336 | 1.0925 | 0.0967 |
| CASQ2      | 1.1756 | 1.0076 | 1.1058 | 1.0814 | 1.0926 | 0.0347 |
| GCC1       | 1.0739 | 1.1943 | 1.2199 | 0.8829 | 1.0928 | 0.0769 |
| SALL4      | 1.0707 | 1.0486 | 1.1960 | 1.0562 | 1.0929 | 0.0347 |
| LOC1001321 | 0.9049 | 1.3596 | 1.2805 | 0.8266 | 1.0929 | 0.1331 |
| BRD9       | 1.1485 | 1.5242 | 1.0376 | 0.6616 | 1.0930 | 0.1775 |
| LOC441775  | 0.9850 | 1.3404 | 1.1441 | 0.9026 | 1.0930 | 0.0965 |
| LOC391833  | 0.8238 | 1.2537 | 1.6069 | 0.6878 | 1.0930 | 0.2095 |
| CLGN       | 1.0473 | 1.2549 | 1.3174 | 0.7528 | 1.0931 | 0.1273 |
| SERPIND1   | 1.1491 | 1.2623 | 1.0962 | 0.8649 | 1.0931 | 0.0836 |
| LOC285943  | 0.9896 | 1.3312 | 1.1145 | 0.9374 | 1.0932 | 0.0876 |
| SPEF1      | 1.0527 | 1.3021 | 1.0643 | 0.9541 | 1.0933 | 0.0739 |
| COPE       | 1.1539 | 1.4886 | 0.9814 | 0.7497 | 1.0934 | 0.1556 |
| ZNF276     | 1.5033 | 1.0246 | 1.1136 | 0.7322 | 1.0934 | 0.1591 |
| GHRL       | 1.0038 | 1.1949 | 1.1545 | 1.0209 | 1.0935 | 0.0477 |
| LOC728244  | 0.8699 | 1.2361 | 1.5917 | 0.6766 | 1.0936 | 0.2026 |
| GSPT2      | 1.0027 | 1.5176 | 1.0515 | 0.8026 | 1.0936 | 0.1512 |
| NCOA3      | 1.0339 | 1.3102 | 1.1606 | 0.8700 | 1.0937 | 0.0935 |
| SNX1       | 1.1066 | 1.2860 | 1.1561 | 0.8262 | 1.0937 | 0.0969 |
| SRP14P1    | 0.9677 | 1.5767 | 1.1989 | 0.6316 | 1.0937 | 0.1987 |

|            |        |        |        |        |        |        |
|------------|--------|--------|--------|--------|--------|--------|
| COQ10A     | 1.0409 | 1.4698 | 1.0867 | 0.7775 | 1.0937 | 0.1427 |
| MIR1915    | 0.7763 | 1.2180 | 1.4000 | 0.9811 | 1.0938 | 0.1362 |
| NUCB1      | 0.9290 | 1.6800 | 1.0403 | 0.7266 | 1.0940 | 0.2058 |
| P4HA1      | 1.2065 | 1.1899 | 1.2303 | 0.7491 | 1.0940 | 0.1152 |
| SMARCE1    | 1.0673 | 1.5172 | 1.0463 | 0.7455 | 1.0941 | 0.1591 |
| NAALAD2    | 0.9175 | 1.3842 | 1.1530 | 0.9218 | 1.0941 | 0.1112 |
| FOXN4      | 0.8995 | 1.1821 | 1.3559 | 0.9391 | 1.0942 | 0.1073 |
| MTRF1L     | 1.0256 | 1.4020 | 1.2597 | 0.6901 | 1.0944 | 0.1555 |
| TSC22D4    | 1.0858 | 1.3595 | 1.0140 | 0.9183 | 1.0944 | 0.0948 |
| CDKN1B     | 1.0475 | 1.5686 | 0.9912 | 0.7702 | 1.0944 | 0.1690 |
| MAP3K1     | 1.0767 | 1.2067 | 1.2613 | 0.8334 | 1.0945 | 0.0953 |
| HLA-DRA    | 0.8811 | 1.3740 | 1.2588 | 0.8644 | 1.0946 | 0.1303 |
| LOC1001279 | 0.8476 | 1.4844 | 1.3007 | 0.7456 | 1.0946 | 0.1773 |
| UTX        | 1.1183 | 1.4693 | 1.0997 | 0.6910 | 1.0946 | 0.1591 |
| LOC647436  | 0.9388 | 1.5231 | 1.1213 | 0.7952 | 1.0946 | 0.1577 |
| LOC493754  | 0.9302 | 1.3025 | 1.2438 | 0.9021 | 1.0947 | 0.1039 |
| CHFR       | 1.1128 | 1.5877 | 0.9537 | 0.7246 | 1.0947 | 0.1826 |
| FBXW2      | 0.9312 | 1.5000 | 1.1114 | 0.8370 | 1.0949 | 0.1465 |
| TXNDC16    | 1.2956 | 1.3279 | 0.9363 | 0.8200 | 1.0949 | 0.1276 |
| LOC730754  | 1.0616 | 1.2277 | 1.2616 | 0.8290 | 1.0950 | 0.0988 |
| MAPRE3     | 1.0565 | 1.3360 | 1.1314 | 0.8562 | 1.0950 | 0.0991 |
| LOC642011  | 0.9682 | 1.3368 | 1.0461 | 1.0289 | 1.0950 | 0.0823 |
| BAT5       | 1.2018 | 1.4601 | 1.0098 | 0.7089 | 1.0952 | 0.1584 |
| QDPR       | 0.8615 | 1.6078 | 1.1144 | 0.7974 | 1.0953 | 0.1840 |
| DCI        | 0.8973 | 1.6818 | 1.0630 | 0.7392 | 1.0953 | 0.2064 |
| CDC42BPB   | 1.0657 | 1.4291 | 1.0145 | 0.8722 | 1.0954 | 0.1185 |
| LDHD       | 1.1081 | 1.4995 | 1.0936 | 0.6805 | 1.0954 | 0.1672 |
| FAM63A     | 0.9103 | 1.4757 | 1.1336 | 0.8629 | 1.0956 | 0.1398 |
| PNCK       | 1.0790 | 1.2116 | 1.1805 | 0.9115 | 1.0956 | 0.0676 |
| LOC729101  | 0.9017 | 1.4832 | 1.2340 | 0.7644 | 1.0958 | 0.1625 |
| LOC643779  | 1.0381 | 1.2534 | 1.2554 | 0.8365 | 1.0958 | 0.1004 |
| EEF1AL7    | 0.7825 | 1.3522 | 1.5121 | 0.7373 | 1.0960 | 0.1970 |
| LOC1001334 | 0.9502 | 1.7141 | 1.0275 | 0.6927 | 1.0961 | 0.2181 |
| GTF2B      | 0.9416 | 1.5961 | 1.0338 | 0.8132 | 1.0962 | 0.1727 |
| CENPBD1    | 1.0348 | 1.4930 | 1.1472 | 0.7100 | 1.0962 | 0.1615 |
| TMTC2      | 0.9641 | 1.3958 | 1.1574 | 0.8679 | 1.0963 | 0.1166 |
| GGT2       | 0.8990 | 1.3941 | 1.1116 | 0.9809 | 1.0964 | 0.1084 |
| CLIP1      | 1.0765 | 1.3474 | 1.2726 | 0.6894 | 1.0965 | 0.1472 |
| SLC25A20   | 1.1251 | 1.4359 | 1.0686 | 0.7564 | 1.0965 | 0.1392 |
| KRT73      | 1.1286 | 1.1426 | 1.1038 | 1.0110 | 1.0965 | 0.0296 |
| PABPC1     | 1.0313 | 1.4133 | 1.1771 | 0.7645 | 1.0965 | 0.1358 |
| RHBDD2     | 0.8764 | 1.4807 | 1.2554 | 0.7744 | 1.0967 | 0.1646 |
| LOC1001335 | 1.0524 | 1.3980 | 1.1014 | 0.8351 | 1.0967 | 0.1159 |
| RAB5B      | 0.9839 | 1.5208 | 1.0695 | 0.8129 | 1.0968 | 0.1511 |
| AHI1       | 1.0158 | 1.2786 | 1.2324 | 0.8605 | 1.0968 | 0.0974 |
| SPSB3      | 1.0458 | 1.4548 | 1.0209 | 0.8659 | 1.0969 | 0.1258 |

|           |        |        |        |        |        |        |
|-----------|--------|--------|--------|--------|--------|--------|
| LGALS8    | 0.9895 | 1.3410 | 1.2222 | 0.8353 | 1.0970 | 0.1137 |
| MED23     | 1.1245 | 1.3983 | 1.0438 | 0.8217 | 1.0971 | 0.1191 |
| RIT2      | 1.0519 | 1.2278 | 1.0893 | 1.0197 | 1.0972 | 0.0458 |
| TTC1      | 0.9792 | 1.5961 | 1.0425 | 0.7718 | 1.0974 | 0.1760 |
| TAPBPL    | 0.9228 | 1.4044 | 1.2693 | 0.7944 | 1.0977 | 0.1432 |
| IFI27L1   | 1.1189 | 1.5494 | 0.9831 | 0.7397 | 1.0977 | 0.1698 |
| IER2      | 1.1203 | 1.3165 | 0.9555 | 0.9987 | 1.0978 | 0.0808 |
| PHF15     | 1.0803 | 1.4172 | 1.0504 | 0.8436 | 1.0979 | 0.1187 |
| GRAMD1C   | 1.0486 | 1.2560 | 1.2676 | 0.8198 | 1.0980 | 0.1055 |
| LOC728650 | 1.1549 | 1.4046 | 0.9773 | 0.8552 | 1.0980 | 0.1193 |
| TNFAIP1   | 1.1194 | 1.5401 | 0.8758 | 0.8570 | 1.0981 | 0.1590 |
| RPS3      | 0.9132 | 1.5398 | 1.0897 | 0.8502 | 1.0982 | 0.1557 |
| CRBN      | 1.0798 | 1.3714 | 1.2751 | 0.6670 | 1.0983 | 0.1560 |
| TMEM45B   | 1.0203 | 1.3537 | 1.2120 | 0.8075 | 1.0984 | 0.1186 |
| C9orf164  | 1.1459 | 1.1903 | 1.1453 | 0.9120 | 1.0984 | 0.0630 |
| KIAA0174  | 0.8679 | 1.8108 | 1.0175 | 0.6991 | 1.0988 | 0.2461 |
| CHST2     | 0.9720 | 1.4055 | 1.1088 | 0.9096 | 1.0990 | 0.1103 |
| KIAA0146  | 1.0983 | 1.5707 | 0.9264 | 0.8006 | 1.0990 | 0.1686 |
| C2orf24   | 1.2516 | 1.2260 | 1.0279 | 0.8910 | 1.0991 | 0.0855 |
| LOC644313 | 0.9450 | 1.1858 | 1.1646 | 1.1015 | 1.0992 | 0.0544 |
| LOC196752 | 1.0879 | 1.3056 | 1.0610 | 0.9431 | 1.0994 | 0.0756 |
| ATP5L     | 1.0724 | 1.3582 | 1.1322 | 0.8353 | 1.0995 | 0.1074 |
| PTTG1IP   | 0.9390 | 1.5833 | 1.0999 | 0.7766 | 1.0997 | 0.1742 |
| THUMPD1   | 0.9427 | 1.4310 | 1.3159 | 0.7092 | 1.0997 | 0.1668 |
| PCSK1N    | 1.0018 | 1.3023 | 1.3065 | 0.7883 | 1.0997 | 0.1259 |
| RNU1-5    | 1.2123 | 1.3248 | 1.0436 | 0.8185 | 1.0998 | 0.1101 |
| PPME1     | 1.0122 | 1.5891 | 1.0667 | 0.7314 | 1.0998 | 0.1789 |
| LOC338758 | 1.1196 | 1.2458 | 1.1812 | 0.8528 | 1.0999 | 0.0863 |
| MLPH      | 1.1101 | 1.5349 | 1.0047 | 0.7506 | 1.1001 | 0.1634 |
| LOC653057 | 1.1094 | 1.1866 | 1.1955 | 0.9090 | 1.1001 | 0.0666 |
| F8A1      | 1.0771 | 1.6212 | 0.8735 | 0.8288 | 1.1002 | 0.1819 |
| DUSP10    | 1.1332 | 1.2261 | 1.2180 | 0.8240 | 1.1003 | 0.0945 |
| VSTM2L    | 1.0722 | 1.1686 | 1.0903 | 1.0708 | 1.1005 | 0.0231 |
| NUB1      | 1.0905 | 1.6176 | 0.9232 | 0.7710 | 1.1006 | 0.1843 |
| SBK1      | 1.1359 | 1.3312 | 1.0281 | 0.9074 | 1.1006 | 0.0899 |
| KDM5B     | 1.1117 | 1.5283 | 0.9692 | 0.7934 | 1.1006 | 0.1567 |
| IQGAP2    | 1.0145 | 1.4775 | 1.0226 | 0.8881 | 1.1007 | 0.1293 |
| TWISTNB   | 1.0899 | 1.4416 | 1.2373 | 0.6343 | 1.1008 | 0.1714 |
| LOC391370 | 0.9972 | 1.2168 | 1.4688 | 0.7203 | 1.1008 | 0.1593 |
| LOC552889 | 0.9637 | 1.5803 | 1.0390 | 0.8204 | 1.1009 | 0.1661 |
| SELK      | 0.9759 | 1.5057 | 1.1621 | 0.7598 | 1.1009 | 0.1580 |
| FAM193A   | 1.0195 | 1.5008 | 1.0435 | 0.8402 | 1.1010 | 0.1408 |
| PPP1R13B  | 0.8622 | 1.6410 | 1.1328 | 0.7683 | 1.1011 | 0.1959 |
| IL1RN     | 0.9429 | 1.2867 | 1.2661 | 0.9087 | 1.1011 | 0.1015 |
| C22orf13  | 1.0468 | 1.6960 | 0.9675 | 0.6944 | 1.1012 | 0.2122 |
| HLF       | 0.9972 | 1.2805 | 1.2499 | 0.8772 | 1.1012 | 0.0980 |



|            |        |        |        |        |        |        |
|------------|--------|--------|--------|--------|--------|--------|
| MEIS3P1    | 1.0823 | 1.4793 | 1.0847 | 0.7586 | 1.1012 | 0.1475 |
| PNKP       | 1.0765 | 1.3357 | 1.2797 | 0.7137 | 1.1014 | 0.1407 |
| MOSC1      | 0.8477 | 1.8041 | 0.9872 | 0.7672 | 1.1016 | 0.2386 |
| C12orf34   | 1.2231 | 1.2327 | 1.0202 | 0.9302 | 1.1016 | 0.0753 |
| LOC550112  | 1.1023 | 1.2818 | 1.1666 | 0.8555 | 1.1016 | 0.0900 |
| DYNC1I2    | 0.8652 | 1.8625 | 0.9456 | 0.7334 | 1.1017 | 0.2574 |
| SLC25A38   | 1.1029 | 1.5309 | 0.9439 | 0.8299 | 1.1019 | 0.1536 |
| DCTN2      | 0.9550 | 1.5802 | 1.0983 | 0.7740 | 1.1019 | 0.1727 |
| ADARB1     | 0.9740 | 1.4591 | 1.1071 | 0.8677 | 1.1020 | 0.1287 |
| SPINT1     | 1.1139 | 1.4499 | 1.0817 | 0.7624 | 1.1020 | 0.1405 |
| C1orf123   | 1.0306 | 1.5301 | 1.1500 | 0.6972 | 1.1020 | 0.1719 |
| LOC650132  | 0.8210 | 1.7493 | 1.0536 | 0.7842 | 1.1020 | 0.2238 |
| ZNF134     | 0.9152 | 1.5219 | 1.1392 | 0.8323 | 1.1021 | 0.1542 |
| FOXD4L2    | 1.2415 | 1.1648 | 1.0838 | 0.9188 | 1.1022 | 0.0691 |
| PDSS2      | 0.9595 | 1.3928 | 1.1832 | 0.8733 | 1.1022 | 0.1168 |
| APLP1      | 1.1125 | 1.3249 | 1.0520 | 0.9195 | 1.1023 | 0.0845 |
| LOC646491  | 0.9870 | 1.2926 | 1.1462 | 0.9836 | 1.1024 | 0.0739 |
| TOM1L2     | 1.0902 | 1.3304 | 1.1017 | 0.8872 | 1.1024 | 0.0906 |
| LOC1001327 | 1.1154 | 1.2612 | 1.1489 | 0.8852 | 1.1027 | 0.0789 |
| FTHL2      | 0.9504 | 1.3210 | 1.3978 | 0.7423 | 1.1029 | 0.1549 |
| LOC730187  | 0.9167 | 1.4784 | 1.1221 | 0.8948 | 1.1030 | 0.1352 |
| ERCC5      | 1.1707 | 1.3184 | 1.1507 | 0.7730 | 1.1032 | 0.1163 |
| TTC3       | 0.9887 | 1.5950 | 1.0331 | 0.7963 | 1.1033 | 0.1718 |
| ACP2       | 1.0790 | 1.3755 | 1.0320 | 0.9265 | 1.1033 | 0.0962 |
| LOC390530  | 0.8117 | 1.5246 | 1.2070 | 0.8698 | 1.1033 | 0.1653 |
| SGK1       | 1.1040 | 1.2037 | 1.2312 | 0.8750 | 1.1035 | 0.0809 |
| FTHL11     | 1.1381 | 1.3211 | 1.2654 | 0.6896 | 1.1035 | 0.1432 |
| NXN        | 1.1075 | 1.4296 | 1.0798 | 0.7977 | 1.1036 | 0.1292 |
| LUZP2      | 0.9495 | 1.5181 | 1.0924 | 0.8546 | 1.1037 | 0.1465 |
| CPEB2      | 1.1938 | 1.2325 | 1.1824 | 0.8062 | 1.1037 | 0.0998 |
| ZBED1      | 0.9870 | 1.5310 | 1.0263 | 0.8709 | 1.1038 | 0.1462 |
| LOC1001296 | 0.9351 | 1.4071 | 1.2046 | 0.8688 | 1.1039 | 0.1244 |
| STIM1      | 1.0613 | 1.5653 | 1.0895 | 0.6997 | 1.1040 | 0.1776 |
| EEF1D      | 0.8890 | 1.5459 | 1.1643 | 0.8167 | 1.1040 | 0.1653 |
| DBT        | 0.8510 | 1.5556 | 1.2001 | 0.8098 | 1.1041 | 0.1741 |
| RIMS3      | 1.1734 | 1.3559 | 1.0208 | 0.8664 | 1.1041 | 0.1047 |
| RIPK2      | 1.0050 | 1.3765 | 1.2086 | 0.8276 | 1.1044 | 0.1195 |
| LPIN2      | 1.0388 | 1.5620 | 0.9801 | 0.8374 | 1.1046 | 0.1582 |
| TRPC4AP    | 1.1103 | 1.5141 | 1.0219 | 0.7723 | 1.1046 | 0.1541 |
| CASC3      | 1.0324 | 1.6927 | 0.8983 | 0.7953 | 1.1047 | 0.2019 |
| ARL4A      | 0.9662 | 1.3477 | 1.1937 | 0.9112 | 1.1047 | 0.1015 |
| C10orf26   | 1.0807 | 1.5996 | 1.0487 | 0.6899 | 1.1047 | 0.1872 |
| ZSWIM6     | 1.0877 | 1.4436 | 1.0760 | 0.8122 | 1.1049 | 0.1296 |
| CRYL1      | 1.0497 | 1.5340 | 1.0069 | 0.8290 | 1.1049 | 0.1508 |
| CSRP2      | 1.1327 | 1.1310 | 1.2702 | 0.8864 | 1.1051 | 0.0798 |
| SNORD50B   | 0.9616 | 1.2473 | 1.2051 | 1.0065 | 1.1051 | 0.0710 |

|            |        |        |        |        |        |        |
|------------|--------|--------|--------|--------|--------|--------|
| KIAA1160   | 1.1321 | 1.3729 | 1.1538 | 0.7618 | 1.1052 | 0.1267 |
| CDC42EP4   | 1.0235 | 1.6507 | 1.0274 | 0.7191 | 1.1052 | 0.1957 |
| ZMAT3      | 0.9195 | 1.1326 | 1.5048 | 0.8641 | 1.1053 | 0.1452 |
| NCOA4      | 0.9873 | 1.5755 | 1.1819 | 0.6770 | 1.1054 | 0.1880 |
| PTPLB      | 1.0417 | 1.3737 | 1.3480 | 0.6587 | 1.1055 | 0.1669 |
| LOC1001299 | 1.0060 | 1.4637 | 1.1364 | 0.8163 | 1.1056 | 0.1363 |
| CDK9       | 0.8941 | 1.5008 | 1.1026 | 0.9250 | 1.1056 | 0.1395 |
| HIVEP1     | 1.1026 | 1.5198 | 0.9952 | 0.8054 | 1.1058 | 0.1511 |
| ZCCHC9     | 0.9349 | 1.4586 | 1.1386 | 0.8911 | 1.1058 | 0.1294 |
| SELS       | 0.9734 | 1.5071 | 1.1302 | 0.8126 | 1.1058 | 0.1487 |
| HSD17B14   | 0.9905 | 1.4562 | 1.1276 | 0.8500 | 1.1061 | 0.1298 |
| LOC201229  | 1.1767 | 1.1477 | 1.2156 | 0.8843 | 1.1061 | 0.0752 |
| C17orf48   | 1.0454 | 1.5001 | 1.1300 | 0.7489 | 1.1061 | 0.1547 |
| ZNF211     | 1.1758 | 1.4637 | 1.0306 | 0.7545 | 1.1062 | 0.1478 |
| SNORA14B   | 0.8763 | 1.5116 | 1.0460 | 0.9928 | 1.1067 | 0.1396 |
| LOC1001331 | 1.0848 | 1.4431 | 1.1168 | 0.7824 | 1.1068 | 0.1351 |
| TMEM8      | 1.0944 | 1.4213 | 1.0712 | 0.8418 | 1.1071 | 0.1192 |
| LOC1001338 | 1.1478 | 1.4488 | 1.1089 | 0.7236 | 1.1073 | 0.1487 |
| PEA15      | 1.0429 | 1.4467 | 1.1660 | 0.7736 | 1.1073 | 0.1397 |
| ITFG3      | 1.0871 | 1.4911 | 1.0253 | 0.8258 | 1.1073 | 0.1396 |
| TRAM1L1    | 1.0631 | 1.1173 | 1.2398 | 1.0093 | 1.1074 | 0.0493 |
| LOC728499  | 1.1332 | 1.6970 | 0.7658 | 0.8339 | 1.1074 | 0.2121 |
| C9orf46    | 1.0136 | 1.4916 | 1.1614 | 0.7634 | 1.1075 | 0.1521 |
| BRPF1      | 0.9292 | 1.4685 | 1.1813 | 0.8519 | 1.1077 | 0.1393 |
| COBLL1     | 0.9531 | 1.5968 | 1.1229 | 0.7590 | 1.1079 | 0.1791 |
| TOM1       | 0.9886 | 1.5278 | 1.0761 | 0.8393 | 1.1080 | 0.1482 |
| PERP       | 1.1003 | 1.3669 | 1.2810 | 0.6838 | 1.1080 | 0.1519 |
| FAAH2      | 1.1019 | 1.2773 | 1.1448 | 0.9090 | 1.1083 | 0.0762 |
| HEY1       | 1.0798 | 1.2777 | 1.1296 | 0.9462 | 1.1083 | 0.0685 |
| LAIR1      | 0.9962 | 1.3522 | 1.1540 | 0.9316 | 1.1085 | 0.0937 |
| LOC338870  | 0.9687 | 1.1798 | 1.6089 | 0.6767 | 1.1085 | 0.1961 |
| NCOA1      | 0.8895 | 1.4507 | 1.1898 | 0.9046 | 1.1087 | 0.1333 |
| LASS4      | 1.0511 | 1.4160 | 1.1204 | 0.8489 | 1.1091 | 0.1174 |
| CYP1A1     | 1.0860 | 1.2609 | 1.2175 | 0.8720 | 1.1091 | 0.0874 |
| RPL13L     | 0.9441 | 1.3940 | 1.3464 | 0.7530 | 1.1094 | 0.1559 |
| CAPNS1     | 1.0480 | 1.4730 | 1.1346 | 0.7819 | 1.1094 | 0.1426 |
| OR7E91P    | 1.1145 | 1.2735 | 1.1442 | 0.9054 | 1.1094 | 0.0763 |
| STYK1      | 1.0388 | 1.2342 | 1.3087 | 0.8558 | 1.1094 | 0.1019 |
| FGF6       | 0.9249 | 0.9857 | 1.0737 | 1.4532 | 1.1094 | 0.1186 |
| KCNH6      | 0.8853 | 1.4914 | 1.2913 | 0.7696 | 1.1094 | 0.1695 |
| PPP1R15A   | 1.1112 | 1.2991 | 1.0600 | 0.9675 | 1.1095 | 0.0699 |
| LHPP       | 1.0269 | 1.6362 | 1.0383 | 0.7365 | 1.1095 | 0.1889 |
| LOC678655  | 0.9786 | 1.3523 | 1.2386 | 0.8686 | 1.1095 | 0.1121 |
| LOC646785  | 0.8174 | 1.3145 | 1.5633 | 0.7428 | 1.1095 | 0.1974 |
| PODXL2     | 1.0131 | 1.5099 | 1.1199 | 0.7958 | 1.1097 | 0.1495 |
| ELOVL5     | 1.1845 | 1.3059 | 1.3174 | 0.6313 | 1.1098 | 0.1623 |

|            |        |        |        |        |        |        |
|------------|--------|--------|--------|--------|--------|--------|
| ANKRD13A   | 0.9879 | 1.4004 | 1.3398 | 0.7110 | 1.1098 | 0.1610 |
| LOC645550  | 1.0996 | 1.4110 | 1.0501 | 0.8789 | 1.1099 | 0.1109 |
| PLEKHA6    | 1.0750 | 1.3281 | 1.1711 | 0.8665 | 1.1102 | 0.0965 |
| PIGK       | 0.8904 | 1.4949 | 1.1851 | 0.8708 | 1.1103 | 0.1470 |
| TMEM86A    | 1.1886 | 1.2346 | 1.0864 | 0.9320 | 1.1104 | 0.0671 |
| HMHA1      | 0.8854 | 1.5847 | 1.1057 | 0.8660 | 1.1104 | 0.1672 |
| C19orf4    | 1.1371 | 1.4445 | 1.1157 | 0.7446 | 1.1105 | 0.1432 |
| KCTD21     | 1.1065 | 1.4277 | 1.1180 | 0.7898 | 1.1105 | 0.1302 |
| FHDC1      | 1.2676 | 1.5124 | 0.9032 | 0.7594 | 1.1106 | 0.1714 |
| BRD3       | 1.1148 | 1.5240 | 0.8809 | 0.9251 | 1.1112 | 0.1467 |
| SYAP1      | 0.9861 | 1.4047 | 1.1823 | 0.8725 | 1.1114 | 0.1169 |
| DBI        | 0.9762 | 1.4494 | 1.2708 | 0.7495 | 1.1115 | 0.1552 |
| RBM16      | 1.1738 | 1.4135 | 1.0982 | 0.7607 | 1.1116 | 0.1349 |
| NFRKB      | 0.9698 | 1.6037 | 1.1162 | 0.7567 | 1.1116 | 0.1799 |
| AKIRIN1    | 0.8855 | 1.6163 | 1.1393 | 0.8055 | 1.1117 | 0.1826 |
| LOC728428  | 0.9003 | 1.3667 | 1.4937 | 0.6865 | 1.1118 | 0.1907 |
| LOC1001322 | 0.9753 | 1.3008 | 1.5473 | 0.6242 | 1.1119 | 0.2004 |
| DOK1       | 1.1177 | 1.2849 | 0.9989 | 1.0462 | 1.1119 | 0.0626 |
| LOC391019  | 0.6951 | 1.4938 | 1.4207 | 0.8396 | 1.1123 | 0.2019 |
| GSTK1      | 0.8464 | 1.6087 | 1.1557 | 0.8384 | 1.1123 | 0.1812 |
| ZNF541     | 1.0947 | 1.3425 | 1.1065 | 0.9068 | 1.1126 | 0.0892 |
| COG6       | 0.9973 | 1.7367 | 1.0004 | 0.7164 | 1.1127 | 0.2184 |
| C19orf36   | 1.0929 | 1.2272 | 1.1892 | 0.9415 | 1.1127 | 0.0637 |
| TLN2       | 0.9434 | 1.3400 | 1.2267 | 0.9410 | 1.1128 | 0.1012 |
| KIAA0953   | 1.0747 | 1.2904 | 1.1182 | 0.9679 | 1.1128 | 0.0671 |
| MAP2K1     | 0.9373 | 1.8325 | 1.0326 | 0.6493 | 1.1129 | 0.2533 |
| NDN        | 0.9504 | 1.6711 | 1.0114 | 0.8192 | 1.1130 | 0.1903 |
| CLEC16A    | 1.0139 | 1.6895 | 0.9826 | 0.7661 | 1.1130 | 0.1999 |
| NAPRT1     | 0.8758 | 1.7450 | 1.1179 | 0.7137 | 1.1131 | 0.2264 |
| SRP19      | 0.9861 | 1.4387 | 1.1965 | 0.8310 | 1.1131 | 0.1319 |
| CYP39A1    | 1.0914 | 1.2573 | 1.2693 | 0.8347 | 1.1132 | 0.1013 |
| SLITRK3    | 0.9905 | 1.3002 | 1.2534 | 0.9098 | 1.1135 | 0.0962 |
| ZNF10      | 1.0709 | 1.4081 | 1.1182 | 0.8566 | 1.1135 | 0.1135 |
| MTHFR      | 1.0397 | 1.4313 | 1.0643 | 0.9193 | 1.1137 | 0.1105 |
| RUNDC1     | 1.0836 | 1.7759 | 0.8853 | 0.7100 | 1.1137 | 0.2335 |
| TRIB2      | 1.0802 | 1.1437 | 1.2356 | 0.9958 | 1.1138 | 0.0506 |
| AZGP1      | 1.1771 | 1.2005 | 1.2279 | 0.8499 | 1.1139 | 0.0886 |
| AFF4       | 1.0902 | 1.5926 | 1.1322 | 0.6405 | 1.1139 | 0.1945 |
| LINGO4     | 1.0062 | 1.2628 | 1.3088 | 0.8778 | 1.1139 | 0.1031 |
| SLC43A2    | 0.8761 | 1.4753 | 1.3019 | 0.8025 | 1.1140 | 0.1632 |
| PJCG6      | 1.0370 | 1.4518 | 1.1157 | 0.8515 | 1.1140 | 0.1255 |
| RAB30      | 0.9903 | 1.3849 | 1.0858 | 0.9950 | 1.1140 | 0.0929 |
| COL16A1    | 1.0930 | 1.2325 | 1.1757 | 0.9547 | 1.1140 | 0.0603 |
| THOC5      | 0.9827 | 1.8222 | 0.9188 | 0.7330 | 1.1142 | 0.2419 |
| WIBG       | 1.0175 | 1.4845 | 1.1801 | 0.7760 | 1.1145 | 0.1487 |
| PRKCA      | 1.2548 | 1.4786 | 0.9747 | 0.7513 | 1.1149 | 0.1591 |

|            |        |        |        |        |        |        |
|------------|--------|--------|--------|--------|--------|--------|
| PEG3       | 1.0782 | 1.5440 | 0.9533 | 0.8843 | 1.1149 | 0.1485 |
| KCNMA1     | 0.9944 | 1.4971 | 1.1246 | 0.8438 | 1.1150 | 0.1397 |
| SI         | 1.1541 | 1.3834 | 1.0990 | 0.8240 | 1.1151 | 0.1149 |
| TESK1      | 1.0743 | 1.4201 | 1.1694 | 0.7971 | 1.1152 | 0.1287 |
| NDRG3      | 1.1534 | 1.4794 | 1.0800 | 0.7481 | 1.1152 | 0.1500 |
| C22orf9    | 0.9674 | 1.4961 | 1.1743 | 0.8232 | 1.1152 | 0.1460 |
| KIFAP3     | 1.0565 | 1.4386 | 1.0974 | 0.8687 | 1.1153 | 0.1187 |
| TPM1       | 0.9550 | 1.4675 | 1.1900 | 0.8488 | 1.1153 | 0.1373 |
| HIST2H2BF  | 0.9795 | 1.6311 | 1.0522 | 0.7986 | 1.1153 | 0.1800 |
| ITPR1      | 1.1499 | 1.4667 | 1.1126 | 0.7324 | 1.1154 | 0.1503 |
| C6orf62    | 1.2679 | 1.2807 | 1.1383 | 0.7749 | 1.1154 | 0.1180 |
| BIRC6      | 1.0831 | 1.3830 | 1.0919 | 0.9041 | 1.1155 | 0.0991 |
| DNASE1L3   | 1.0662 | 1.2189 | 1.2337 | 0.9451 | 1.1160 | 0.0684 |
| NOTCH1     | 0.9458 | 1.7803 | 0.9378 | 0.8002 | 1.1160 | 0.2239 |
| RAG1AP1    | 0.8930 | 1.6207 | 1.2293 | 0.7213 | 1.1161 | 0.1986 |
| LOC653656  | 0.9397 | 1.3859 | 1.0839 | 1.0550 | 1.1161 | 0.0952 |
| HLA-H      | 1.0466 | 1.4673 | 1.0941 | 0.8569 | 1.1163 | 0.1277 |
| CHD9       | 1.0434 | 1.5225 | 1.0474 | 0.8518 | 1.1163 | 0.1429 |
| CCDC83     | 1.0092 | 1.2760 | 1.3580 | 0.8228 | 1.1165 | 0.1230 |
| LOC440040  | 1.2177 | 1.2014 | 1.1157 | 0.9314 | 1.1166 | 0.0656 |
| KIAA1545   | 1.1722 | 1.3939 | 1.0508 | 0.8497 | 1.1166 | 0.1139 |
| USP54      | 0.9872 | 1.6642 | 1.0086 | 0.8067 | 1.1167 | 0.1880 |
| SMCP       | 0.8146 | 1.3206 | 1.3542 | 0.9774 | 1.1167 | 0.1319 |
| ZNF518A    | 1.1263 | 1.3195 | 1.0718 | 0.9492 | 1.1167 | 0.0771 |
| SRP14      | 1.0595 | 1.5277 | 1.1079 | 0.7721 | 1.1168 | 0.1557 |
| SNRK       | 1.1050 | 1.5222 | 1.0802 | 0.7604 | 1.1169 | 0.1562 |
| LOC730316  | 0.9600 | 1.6462 | 1.0841 | 0.7778 | 1.1170 | 0.1873 |
| RPS6KB1    | 1.1118 | 1.5333 | 1.1197 | 0.7038 | 1.1171 | 0.1693 |
| LOC1001308 | 0.6904 | 0.9802 | 1.9642 | 0.8338 | 1.1172 | 0.2885 |
| NPDC1      | 1.1900 | 1.4361 | 1.0204 | 0.8226 | 1.1173 | 0.1301 |
| LOC390031  | 1.1599 | 1.1751 | 1.2482 | 0.8859 | 1.1173 | 0.0795 |
| LOC1001279 | 0.9694 | 1.5987 | 1.0407 | 0.8606 | 1.1174 | 0.1647 |
| SULT1A1    | 1.0751 | 1.4326 | 1.1275 | 0.8346 | 1.1174 | 0.1229 |
| OGDHL      | 0.9932 | 1.3396 | 1.2903 | 0.8468 | 1.1175 | 0.1183 |
| COQ10B     | 0.8183 | 1.7206 | 1.1723 | 0.7587 | 1.1175 | 0.2208 |
| ERBB2      | 1.0738 | 1.4562 | 1.2187 | 0.7213 | 1.1175 | 0.1538 |
| DGCR2      | 1.2647 | 1.5724 | 0.8871 | 0.7459 | 1.1175 | 0.1870 |
| LOC1001323 | 0.9088 | 1.4034 | 1.3668 | 0.7913 | 1.1176 | 0.1565 |
| PPP2R5B    | 1.0642 | 1.3713 | 1.1336 | 0.9012 | 1.1176 | 0.0976 |
| ZNF664     | 1.1604 | 1.4567 | 1.0318 | 0.8218 | 1.1176 | 0.1328 |
| B3GALT4    | 1.1907 | 1.2213 | 1.1249 | 0.9346 | 1.1179 | 0.0643 |
| OCEL1      | 1.1886 | 1.6084 | 0.9905 | 0.6841 | 1.1179 | 0.1937 |
| CUL4B      | 0.9058 | 1.5852 | 1.2590 | 0.7218 | 1.1179 | 0.1915 |
| ATG2A      | 1.1546 | 1.3864 | 1.0561 | 0.8747 | 1.1180 | 0.1066 |
| EFS        | 1.1957 | 1.4906 | 1.0203 | 0.7653 | 1.1180 | 0.1524 |
| TSPAN1     | 1.0953 | 1.4089 | 1.1012 | 0.8667 | 1.1180 | 0.1113 |

|            |        |        |        |        |        |        |
|------------|--------|--------|--------|--------|--------|--------|
| RAB1B      | 0.7901 | 1.6361 | 1.2293 | 0.8167 | 1.1181 | 0.1998 |
| ZNF783     | 1.1353 | 1.4620 | 1.0750 | 0.8003 | 1.1181 | 0.1358 |
| C14orf112  | 0.8877 | 1.7565 | 1.1587 | 0.6708 | 1.1184 | 0.2349 |
| DPY19L1    | 1.1466 | 1.3957 | 1.1737 | 0.7582 | 1.1186 | 0.1324 |
| LOC1001309 | 1.0269 | 1.2723 | 1.3686 | 0.8069 | 1.1187 | 0.1264 |
| PRAC       | 0.9617 | 1.7119 | 1.0535 | 0.7482 | 1.1188 | 0.2078 |
| COQ7       | 1.0001 | 1.5943 | 1.0498 | 0.8324 | 1.1191 | 0.1651 |
| MGC18216   | 1.3846 | 1.2977 | 1.0131 | 0.7817 | 1.1193 | 0.1377 |
| EIF2B1     | 1.1031 | 1.4968 | 1.0417 | 0.8358 | 1.1194 | 0.1382 |
| DHTKD1     | 1.2157 | 1.3177 | 0.9754 | 0.9689 | 1.1194 | 0.0876 |
| HLA-DRB6   | 1.1133 | 1.2603 | 1.2054 | 0.8991 | 1.1196 | 0.0795 |
| OAZ3       | 0.9566 | 1.4449 | 1.2463 | 0.8307 | 1.1196 | 0.1390 |
| KIAA1267   | 1.1091 | 1.4263 | 1.0925 | 0.8509 | 1.1197 | 0.1180 |
| TACSTD2    | 1.0921 | 1.3280 | 1.1052 | 0.9539 | 1.1198 | 0.0774 |
| AXIN2      | 1.1314 | 1.4740 | 1.0179 | 0.8561 | 1.1199 | 0.1309 |
| KIAA1737   | 0.9794 | 1.4990 | 1.2410 | 0.7607 | 1.1200 | 0.1600 |
| LOC732138  | 1.2014 | 1.3867 | 1.1667 | 0.7253 | 1.1200 | 0.1402 |
| SLC7A2     | 0.8799 | 1.4296 | 1.4232 | 0.7483 | 1.1203 | 0.1788 |
| COL5A2     | 1.0615 | 1.3470 | 1.1576 | 0.9150 | 1.1203 | 0.0906 |
| EFHC2      | 0.9622 | 1.3185 | 1.3215 | 0.8796 | 1.1205 | 0.1164 |
| SUPT6H     | 1.1399 | 1.4216 | 1.1626 | 0.7591 | 1.1208 | 0.1364 |
| TSPYL4     | 1.1696 | 1.4259 | 0.9922 | 0.8956 | 1.1208 | 0.1164 |
| LOC644634  | 1.0491 | 1.3910 | 1.1327 | 0.9110 | 1.1209 | 0.1009 |
| ZFYVE21    | 1.0242 | 1.6004 | 1.0857 | 0.7741 | 1.1211 | 0.1734 |
| DCUN1D3    | 1.0761 | 1.5145 | 1.0523 | 0.8415 | 1.1211 | 0.1413 |
| PTPRR      | 1.1446 | 1.4955 | 1.1052 | 0.7391 | 1.1211 | 0.1546 |
| COX6C      | 1.2328 | 1.4468 | 1.1309 | 0.6752 | 1.1214 | 0.1627 |
| TANC2      | 0.9490 | 1.4591 | 1.1598 | 0.9179 | 1.1214 | 0.1247 |
| APOBEC3H   | 1.0592 | 1.3854 | 1.1491 | 0.8928 | 1.1216 | 0.1027 |
| GPR108     | 1.3516 | 1.4950 | 0.8085 | 0.8318 | 1.1217 | 0.1766 |
| LOC440311  | 1.0272 | 1.4351 | 1.0973 | 0.9275 | 1.1218 | 0.1101 |
| C10orf41   | 0.9936 | 1.3357 | 1.1802 | 0.9777 | 1.1218 | 0.0848 |
| ORMDL3     | 1.1168 | 1.2865 | 1.1082 | 0.9764 | 1.1219 | 0.0636 |
| CAMK2G     | 1.0836 | 1.5960 | 0.9768 | 0.8314 | 1.1220 | 0.1663 |
| DSEL       | 1.0329 | 1.2585 | 1.2626 | 0.9341 | 1.1220 | 0.0825 |
| LOC647673  | 1.0367 | 1.3749 | 1.3203 | 0.7574 | 1.1223 | 0.1425 |
| C1RL       | 1.1724 | 1.5316 | 1.0660 | 0.7196 | 1.1224 | 0.1672 |
| WNT7B      | 1.0948 | 1.2838 | 1.1272 | 0.9842 | 1.1225 | 0.0618 |
| LOC341230  | 0.8600 | 1.4864 | 1.2139 | 0.9300 | 1.1226 | 0.1434 |
| TM7SF3     | 0.7707 | 1.4419 | 1.5814 | 0.6972 | 1.1228 | 0.2268 |
| LOC645715  | 1.0375 | 1.4033 | 1.3377 | 0.7129 | 1.1229 | 0.1582 |
| SPRY1      | 0.9261 | 1.4832 | 1.2285 | 0.8537 | 1.1229 | 0.1450 |
| C11orf92   | 1.1934 | 1.4587 | 1.3054 | 0.5352 | 1.1232 | 0.2034 |
| RTN4       | 0.9352 | 1.6157 | 1.2258 | 0.7167 | 1.1234 | 0.1944 |
| ICMT       | 1.1100 | 1.4009 | 1.2272 | 0.7556 | 1.1234 | 0.1364 |
| SESN3      | 0.8276 | 1.5671 | 1.2601 | 0.8389 | 1.1234 | 0.1789 |

|            |        |        |        |        |        |        |
|------------|--------|--------|--------|--------|--------|--------|
| ELL2       | 0.9962 | 1.4068 | 1.4450 | 0.6462 | 1.1235 | 0.1888 |
| LOC728672  | 0.9613 | 1.3375 | 1.4205 | 0.7756 | 1.1237 | 0.1531 |
| C14orf159  | 1.1161 | 1.5548 | 1.0448 | 0.7793 | 1.1238 | 0.1609 |
| SPINK8     | 1.2024 | 1.1846 | 1.1402 | 0.9684 | 1.1239 | 0.0535 |
| PJA2       | 1.0700 | 1.3511 | 1.2821 | 0.7937 | 1.1242 | 0.1254 |
| ZNF462     | 1.1475 | 1.3972 | 1.1284 | 0.8247 | 1.1245 | 0.1172 |
| TMEM59L    | 1.0180 | 1.4373 | 1.1916 | 0.8516 | 1.1246 | 0.1252 |
| LOC344595  | 1.1608 | 1.4289 | 1.0620 | 0.8471 | 1.1247 | 0.1207 |
| FAM195B    | 0.9294 | 1.6632 | 1.0538 | 0.8523 | 1.1247 | 0.1843 |
| ARF5       | 0.9077 | 1.7074 | 1.0956 | 0.7887 | 1.1248 | 0.2042 |
| LOC440927  | 1.1545 | 1.2908 | 1.2134 | 0.8418 | 1.1251 | 0.0985 |
| AP2B1      | 1.0668 | 1.5520 | 1.0269 | 0.8548 | 1.1251 | 0.1495 |
| LOC388969  | 1.1657 | 1.0996 | 1.2631 | 0.9723 | 1.1251 | 0.0610 |
| TMEM179B   | 1.1299 | 1.5314 | 1.0954 | 0.7440 | 1.1252 | 0.1610 |
| CBARA1     | 0.9439 | 1.6317 | 1.1858 | 0.7394 | 1.1252 | 0.1919 |
| YPEL2      | 1.2848 | 1.3302 | 1.0135 | 0.8725 | 1.1252 | 0.1095 |
| KCTD10     | 1.1145 | 1.5849 | 1.0994 | 0.7025 | 1.1253 | 0.1805 |
| LOC729843  | 1.1477 | 1.3844 | 1.2172 | 0.7523 | 1.1254 | 0.1339 |
| FLJ22795   | 1.0619 | 1.4800 | 1.1461 | 0.8139 | 1.1255 | 0.1376 |
| CRYAB      | 1.0452 | 1.4072 | 1.0907 | 0.9590 | 1.1256 | 0.0978 |
| HDHD2      | 0.8910 | 1.7137 | 1.1806 | 0.7171 | 1.1256 | 0.2181 |
| MAF        | 1.1812 | 1.2566 | 1.1109 | 0.9544 | 1.1258 | 0.0644 |
| LOC648526  | 0.9943 | 1.6606 | 0.9578 | 0.8909 | 1.1259 | 0.1795 |
| MMP7       | 1.1184 | 1.2209 | 1.2678 | 0.8966 | 1.1260 | 0.0826 |
| MPV17      | 0.9982 | 1.5857 | 1.1065 | 0.8137 | 1.1260 | 0.1647 |
| LOC644590  | 1.1637 | 1.4333 | 1.1314 | 0.7757 | 1.1260 | 0.1350 |
| ZNF91      | 1.1487 | 1.2709 | 1.2875 | 0.7976 | 1.1262 | 0.1138 |
| ZKSCAN1    | 1.0134 | 1.3316 | 1.3378 | 0.8219 | 1.1262 | 0.1266 |
| C12orf51   | 1.3028 | 1.5631 | 0.7772 | 0.8625 | 1.1264 | 0.1856 |
| NOS3       | 1.0616 | 1.2200 | 1.2001 | 1.0239 | 1.1264 | 0.0491 |
| TRIM52     | 1.0785 | 1.5148 | 1.0728 | 0.8400 | 1.1265 | 0.1408 |
| SLC26A3    | 1.1357 | 1.3229 | 1.0878 | 0.9602 | 1.1267 | 0.0752 |
| TUBB3      | 1.2651 | 1.4702 | 0.9600 | 0.8120 | 1.1268 | 0.1483 |
| PDE9A      | 1.1003 | 1.5404 | 1.0455 | 0.8211 | 1.1268 | 0.1505 |
| FTHL3      | 1.0786 | 1.3097 | 1.4598 | 0.6594 | 1.1269 | 0.1744 |
| CCNG1      | 1.0230 | 1.4219 | 1.4007 | 0.6625 | 1.1270 | 0.1799 |
| C19orf12   | 1.0331 | 1.4360 | 1.1662 | 0.8730 | 1.1271 | 0.1191 |
| LOC1001317 | 1.0243 | 1.3053 | 1.4031 | 0.7760 | 1.1272 | 0.1419 |
| AGAP6      | 1.1720 | 1.4423 | 1.0214 | 0.8735 | 1.1273 | 0.1214 |
| IL1F5      | 1.0573 | 1.2288 | 1.2517 | 0.9720 | 1.1275 | 0.0676 |
| TNFRSF10D  | 0.8682 | 1.5653 | 1.1837 | 0.8928 | 1.1275 | 0.1626 |
| LOC653199  | 1.1979 | 1.3041 | 1.1217 | 0.8867 | 1.1276 | 0.0886 |
| LRPAP1     | 1.0302 | 1.4948 | 1.1934 | 0.7923 | 1.1277 | 0.1475 |
| UBE2H      | 0.9102 | 1.6267 | 1.2442 | 0.7298 | 1.1277 | 0.1975 |
| MAP1S      | 1.1173 | 1.2612 | 1.0889 | 1.0441 | 1.1279 | 0.0469 |
| DNAL4      | 1.1420 | 1.5799 | 1.0502 | 0.7394 | 1.1279 | 0.1736 |

|           |        |        |        |        |        |        |
|-----------|--------|--------|--------|--------|--------|--------|
| C17orf68  | 1.0608 | 1.5310 | 1.1153 | 0.8050 | 1.1280 | 0.1504 |
| UPK3A     | 1.0214 | 1.3636 | 1.2733 | 0.8542 | 1.1281 | 0.1165 |
| TBC1D8    | 1.3507 | 1.3139 | 1.0352 | 0.8128 | 1.1282 | 0.1265 |
| EPAS1     | 1.0306 | 1.4134 | 1.1769 | 0.8917 | 1.1282 | 0.1115 |
| NADSYN1   | 1.1286 | 1.2672 | 1.3022 | 0.8150 | 1.1283 | 0.1110 |
| MAOA      | 0.9328 | 1.6601 | 1.2036 | 0.7165 | 1.1283 | 0.2034 |
| DISP1     | 1.2456 | 1.3695 | 1.2108 | 0.6872 | 1.1283 | 0.1509 |
| ACO1      | 0.9170 | 1.8515 | 1.0127 | 0.7322 | 1.1283 | 0.2480 |
| LPCAT3    | 0.8914 | 1.5123 | 1.2007 | 0.9091 | 1.1284 | 0.1463 |
| GGTLC2    | 0.8766 | 1.3745 | 1.2666 | 0.9965 | 1.1285 | 0.1156 |
| FTHL12    | 0.8316 | 1.4315 | 1.6012 | 0.6500 | 1.1286 | 0.2296 |
| RPL11     | 0.9095 | 1.6933 | 1.0684 | 0.8436 | 1.1287 | 0.1940 |
| LOC728908 | 1.0780 | 1.6331 | 0.9655 | 0.8383 | 1.1287 | 0.1751 |
| STAP2     | 1.1628 | 1.4762 | 1.0724 | 0.8037 | 1.1288 | 0.1387 |
| ANGPT2    | 1.0889 | 1.3031 | 1.1971 | 0.9265 | 1.1289 | 0.0804 |
| SULT1A4   | 1.1597 | 1.4505 | 1.1123 | 0.7936 | 1.1290 | 0.1345 |
| JMJD2A    | 1.0976 | 1.4044 | 1.1031 | 0.9112 | 1.1291 | 0.1020 |
| GTF3C6    | 1.0458 | 1.5765 | 1.2278 | 0.6663 | 1.1291 | 0.1895 |
| ABCB11    | 1.1989 | 1.2490 | 1.1175 | 0.9512 | 1.1292 | 0.0652 |
| PI4KAP2   | 1.1801 | 1.5694 | 1.0123 | 0.7563 | 1.1295 | 0.1706 |
| KIAA0528  | 1.3051 | 1.5134 | 0.9788 | 0.7209 | 1.1295 | 0.1751 |
| SIRT2     | 1.0733 | 1.3417 | 1.2440 | 0.8592 | 1.1296 | 0.1058 |
| MCEE      | 0.8955 | 1.6160 | 1.1271 | 0.8797 | 1.1296 | 0.1717 |
| FZD5      | 1.1670 | 1.1950 | 1.1228 | 1.0346 | 1.1299 | 0.0351 |
| FKBP15    | 1.1963 | 1.3564 | 1.0869 | 0.8799 | 1.1299 | 0.1000 |
| TEF       | 1.1312 | 1.4723 | 1.1629 | 0.7532 | 1.1299 | 0.1473 |
| DENND5B   | 0.9851 | 1.3791 | 1.3125 | 0.8439 | 1.1301 | 0.1285 |
| LOC641849 | 0.9043 | 1.4292 | 1.4814 | 0.7059 | 1.1302 | 0.1923 |
| LOC400948 | 0.9611 | 1.5933 | 1.1921 | 0.7747 | 1.1303 | 0.1764 |
| FBXO2     | 1.3099 | 1.3394 | 0.9637 | 0.9082 | 1.1303 | 0.1129 |
| CSNK1A1   | 0.9915 | 1.4730 | 1.2110 | 0.8459 | 1.1304 | 0.1367 |
| LAT2      | 1.1947 | 1.2820 | 1.1230 | 0.9225 | 1.1305 | 0.0766 |
| SUOX      | 1.1110 | 1.4921 | 1.1079 | 0.8118 | 1.1307 | 0.1394 |
| SNN       | 1.0323 | 1.3778 | 1.2073 | 0.9077 | 1.1313 | 0.1026 |
| HSD3B1    | 1.0641 | 1.2848 | 1.3392 | 0.8376 | 1.1314 | 0.1146 |
| CD9       | 1.1816 | 1.4953 | 1.2024 | 0.6467 | 1.1315 | 0.1768 |
| FNBP1L    | 1.1679 | 1.4652 | 1.1601 | 0.7333 | 1.1316 | 0.1506 |
| ZNF433    | 1.0488 | 1.3757 | 1.2230 | 0.8790 | 1.1316 | 0.1075 |
| ITGB1     | 0.9441 | 1.6641 | 1.1702 | 0.7495 | 1.1320 | 0.1971 |
| PTPN11    | 1.0159 | 1.5806 | 1.0743 | 0.8585 | 1.1323 | 0.1562 |
| LOC653610 | 1.0388 | 1.6334 | 1.1585 | 0.6988 | 1.1323 | 0.1933 |
| PCDHB13   | 1.1297 | 1.2067 | 1.1725 | 1.0206 | 1.1324 | 0.0405 |
| ZNF606    | 1.2072 | 1.3290 | 1.1405 | 0.8537 | 1.1326 | 0.1008 |
| ASMTL     | 1.0581 | 1.5901 | 1.1053 | 0.7770 | 1.1326 | 0.1688 |
| HAGH      | 1.0806 | 1.5345 | 1.1335 | 0.7826 | 1.1328 | 0.1546 |
| CLCN3     | 1.1631 | 1.4340 | 1.2542 | 0.6800 | 1.1328 | 0.1611 |

|            |        |        |        |        |        |        |
|------------|--------|--------|--------|--------|--------|--------|
| COL4A3BP   | 0.9023 | 1.7445 | 1.1592 | 0.7256 | 1.1329 | 0.2224 |
| ATP11B     | 1.0102 | 1.5296 | 1.1198 | 0.8722 | 1.1329 | 0.1416 |
| ZW10       | 1.1220 | 1.4966 | 1.1837 | 0.7295 | 1.1330 | 0.1575 |
| RBM17      | 0.9277 | 1.7270 | 0.9940 | 0.8835 | 1.1330 | 0.1993 |
| TM9SF3     | 1.1416 | 1.3721 | 1.2800 | 0.7386 | 1.1331 | 0.1398 |
| SHMT1      | 1.0955 | 1.6008 | 1.0599 | 0.7773 | 1.1334 | 0.1713 |
| C10orf32   | 1.1345 | 1.5171 | 1.1189 | 0.7631 | 1.1334 | 0.1540 |
| TMED1      | 0.9628 | 1.7082 | 1.0720 | 0.7909 | 1.1335 | 0.2001 |
| ECH1       | 0.9860 | 1.6653 | 1.1548 | 0.7287 | 1.1337 | 0.1977 |
| ERV3       | 1.1267 | 1.3940 | 1.1968 | 0.8177 | 1.1338 | 0.1196 |
| C1orf50    | 1.0241 | 1.6757 | 1.0516 | 0.7841 | 1.1339 | 0.1904 |
| DYRK1B     | 1.0461 | 1.3549 | 1.2289 | 0.9057 | 1.1339 | 0.0990 |
| C20orf30   | 1.1388 | 1.5835 | 1.1576 | 0.6559 | 1.1339 | 0.1895 |
| LOC650029  | 0.9052 | 1.7841 | 1.0678 | 0.7813 | 1.1346 | 0.2243 |
| RN5S9      | 0.7048 | 1.5179 | 1.5838 | 0.7332 | 1.1349 | 0.2406 |
| HLA-C      | 1.0219 | 1.3212 | 1.2794 | 0.9177 | 1.1350 | 0.0981 |
| SLC9A1     | 0.8913 | 1.9502 | 0.8785 | 0.8202 | 1.1350 | 0.2722 |
| FTHL8      | 0.9827 | 1.6382 | 1.2882 | 0.6314 | 1.1351 | 0.2148 |
| LOC1001333 | 1.1430 | 1.1425 | 1.3840 | 0.8716 | 1.1353 | 0.1047 |
| NNT        | 1.2237 | 1.2423 | 1.1307 | 0.9446 | 1.1353 | 0.0681 |
| C20orf52   | 0.9421 | 1.7026 | 1.0771 | 0.8195 | 1.1353 | 0.1963 |
| LACTB      | 0.9776 | 1.5977 | 1.1326 | 0.8347 | 1.1356 | 0.1656 |
| RASD1      | 1.2782 | 1.2800 | 1.0717 | 0.9139 | 1.1359 | 0.0887 |
| STBD1      | 0.9599 | 1.6510 | 1.1753 | 0.7576 | 1.1360 | 0.1917 |
| FIG4       | 1.1610 | 1.4701 | 1.1227 | 0.7905 | 1.1361 | 0.1390 |
| LOC646949  | 1.0969 | 1.2733 | 1.4073 | 0.7668 | 1.1361 | 0.1385 |
| KIAA1324L  | 1.1552 | 1.5262 | 1.0677 | 0.7954 | 1.1361 | 0.1509 |
| LOC644596  | 1.1146 | 1.2461 | 1.1244 | 1.0604 | 1.1364 | 0.0392 |
| LOC1001296 | 1.0275 | 1.2997 | 1.2388 | 0.9797 | 1.1364 | 0.0783 |
| KCTD13     | 1.2008 | 1.4167 | 1.0380 | 0.8905 | 1.1365 | 0.1129 |
| BMX        | 1.1446 | 1.3429 | 1.1241 | 0.9356 | 1.1368 | 0.0833 |
| CCDC23     | 1.2075 | 1.3839 | 1.1512 | 0.8051 | 1.1369 | 0.1212 |
| ATG4A      | 1.1608 | 1.4696 | 1.2052 | 0.7125 | 1.1370 | 0.1571 |
| PELI2      | 1.1259 | 1.4473 | 1.0537 | 0.9217 | 1.1371 | 0.1117 |
| ACTN4      | 0.9518 | 1.5579 | 1.1825 | 0.8568 | 1.1372 | 0.1560 |
| G3BP2      | 0.9284 | 1.5699 | 1.2826 | 0.7694 | 1.1376 | 0.1796 |
| MPDZ       | 1.0622 | 1.6591 | 1.0453 | 0.7843 | 1.1377 | 0.1851 |
| WDR25      | 1.0856 | 1.4903 | 1.1310 | 0.8445 | 1.1379 | 0.1332 |
| SMA5       | 0.9816 | 1.5767 | 1.3170 | 0.6769 | 1.1380 | 0.1961 |
| TAP1       | 0.8617 | 1.7338 | 1.1367 | 0.8204 | 1.1382 | 0.2106 |
| DCTN6      | 1.0817 | 1.7070 | 0.9007 | 0.8637 | 1.1383 | 0.1955 |
| HDAC1      | 0.9976 | 1.5853 | 1.1257 | 0.8467 | 1.1388 | 0.1594 |
| MAP1LC3B   | 1.0165 | 1.5872 | 1.1407 | 0.8112 | 1.1389 | 0.1642 |
| MYBPC1     | 1.2722 | 1.2883 | 1.0588 | 0.9367 | 1.1390 | 0.0853 |
| ZMIZ1      | 1.0533 | 1.4793 | 1.1368 | 0.8867 | 1.1390 | 0.1248 |
| LOC1001324 | 0.9316 | 1.5590 | 1.2663 | 0.7996 | 1.1391 | 0.1710 |



|            |        |        |        |        |        |        |
|------------|--------|--------|--------|--------|--------|--------|
| IRF7       | 1.2263 | 1.4378 | 1.0660 | 0.8267 | 1.1392 | 0.1290 |
| SAP18      | 0.9496 | 1.6071 | 1.1221 | 0.8782 | 1.1392 | 0.1641 |
| RPS13      | 1.0026 | 1.5517 | 1.3415 | 0.6616 | 1.1394 | 0.1953 |
| CSRNP2     | 1.2566 | 1.3718 | 1.0326 | 0.8971 | 1.1395 | 0.1072 |
| LOC653080  | 1.0190 | 1.6821 | 1.1021 | 0.7550 | 1.1395 | 0.1954 |
| USP43      | 1.1867 | 1.3583 | 1.1318 | 0.8815 | 1.1396 | 0.0986 |
| MLL        | 0.9821 | 1.2692 | 1.2689 | 1.0383 | 1.1396 | 0.0756 |
| CAP2       | 0.7209 | 1.9400 | 1.2410 | 0.6572 | 1.1398 | 0.2971 |
| LOC399965  | 1.0812 | 1.4238 | 1.2118 | 0.8423 | 1.1398 | 0.1217 |
| UBAP1      | 1.0189 | 1.6633 | 1.0895 | 0.7877 | 1.1398 | 0.1860 |
| BAZ2B      | 1.0870 | 1.4810 | 1.0414 | 0.9500 | 1.1398 | 0.1172 |
| TOB2       | 1.2704 | 1.3342 | 1.0549 | 0.8998 | 1.1399 | 0.0998 |
| LAMP2      | 1.1153 | 1.4553 | 1.2557 | 0.7338 | 1.1400 | 0.1523 |
| IRS2       | 1.2930 | 1.4507 | 1.0022 | 0.8144 | 1.1401 | 0.1429 |
| NDUFA2     | 1.0689 | 1.6717 | 1.1070 | 0.7128 | 1.1401 | 0.1982 |
| AEN        | 0.9791 | 1.5870 | 1.1551 | 0.8393 | 1.1401 | 0.1624 |
| IPO13      | 1.3070 | 1.3711 | 1.0364 | 0.8468 | 1.1403 | 0.1218 |
| ANKRD22    | 0.9635 | 1.4692 | 1.3526 | 0.7766 | 1.1405 | 0.1625 |
| RPL13A     | 1.1975 | 1.4917 | 1.1795 | 0.6933 | 1.1405 | 0.1654 |
| FRAP1      | 0.9704 | 1.8571 | 0.9257 | 0.8100 | 1.1408 | 0.2411 |
| LOC283050  | 1.2600 | 1.2088 | 1.1682 | 0.9265 | 1.1409 | 0.0739 |
| LOC1001335 | 1.0786 | 1.2986 | 1.2479 | 0.9394 | 1.1411 | 0.0821 |
| UBE1       | 1.0155 | 1.6685 | 1.1176 | 0.7631 | 1.1412 | 0.1909 |
| ZFAND6     | 0.7797 | 1.7688 | 1.1941 | 0.8233 | 1.1415 | 0.2288 |
| SNORA7B    | 0.9845 | 1.5913 | 1.2104 | 0.7801 | 1.1416 | 0.1738 |
| FAM127A    | 1.0872 | 1.6374 | 1.0522 | 0.7899 | 1.1417 | 0.1781 |
| LOC1001336 | 0.9325 | 1.4441 | 1.4454 | 0.7450 | 1.1418 | 0.1791 |
| RIOK3      | 0.8987 | 1.7055 | 1.1688 | 0.7941 | 1.1418 | 0.2038 |
| KCNK13     | 1.1998 | 1.2860 | 1.1388 | 0.9427 | 1.1419 | 0.0729 |
| STAG3L4    | 1.0643 | 1.5042 | 1.1943 | 0.8065 | 1.1423 | 0.1451 |
| GRAMD4     | 0.9795 | 1.5759 | 1.1737 | 0.8404 | 1.1424 | 0.1598 |
| RHOV       | 1.1114 | 1.4468 | 1.1835 | 0.8279 | 1.1424 | 0.1272 |
| FER1L4     | 1.1016 | 1.2911 | 1.1923 | 0.9850 | 1.1425 | 0.0652 |
| TMEM14C    | 1.0946 | 1.6375 | 1.0901 | 0.7477 | 1.1425 | 0.1839 |
| RHOC       | 1.0260 | 1.5064 | 1.1402 | 0.8979 | 1.1426 | 0.1310 |
| GALNT10    | 1.0997 | 1.3774 | 1.2267 | 0.8679 | 1.1429 | 0.1078 |
| SLC44A4    | 1.0126 | 1.6912 | 1.1316 | 0.7366 | 1.1430 | 0.2006 |
| PHF1       | 1.2956 | 1.3142 | 1.1068 | 0.8555 | 1.1430 | 0.1067 |
| GNA11      | 1.1641 | 1.2827 | 1.1759 | 0.9500 | 1.1432 | 0.0697 |
| FAM18B     | 1.0126 | 1.6637 | 1.1424 | 0.7541 | 1.1432 | 0.1913 |
| ZHX2       | 1.0940 | 1.4961 | 1.1302 | 0.8525 | 1.1432 | 0.1328 |
| UBE2A      | 0.9834 | 1.6245 | 1.0819 | 0.8834 | 1.1433 | 0.1654 |
| SORD       | 0.8810 | 1.7556 | 1.1743 | 0.7632 | 1.1435 | 0.2216 |
| ARL6IP5    | 0.9294 | 1.6708 | 1.2496 | 0.7247 | 1.1436 | 0.2063 |
| LOC653381  | 1.0459 | 1.4112 | 1.2487 | 0.8689 | 1.1436 | 0.1182 |
| LOC1001300 | 1.2301 | 1.4724 | 1.0079 | 0.8649 | 1.1438 | 0.1328 |

|            |        |        |        |        |        |        |
|------------|--------|--------|--------|--------|--------|--------|
| PRIC285    | 1.1171 | 1.6116 | 0.9319 | 0.9160 | 1.1441 | 0.1624 |
| ACADVL     | 0.9210 | 1.7812 | 1.1196 | 0.7548 | 1.1442 | 0.2250 |
| C5orf15    | 1.1411 | 1.7040 | 0.9493 | 0.7825 | 1.1442 | 0.2004 |
| SAMD9      | 1.1512 | 1.3388 | 1.1667 | 0.9203 | 1.1443 | 0.0859 |
| SCARNA9    | 1.0825 | 1.2779 | 1.3919 | 0.8251 | 1.1444 | 0.1241 |
| C13orf1    | 1.1844 | 1.3575 | 1.1659 | 0.8696 | 1.1444 | 0.1012 |
| CATSPER2   | 0.9772 | 1.3674 | 1.4934 | 0.7424 | 1.1451 | 0.1735 |
| LOC1001330 | 1.0772 | 1.3838 | 1.0261 | 1.0949 | 1.1455 | 0.0808 |
| ERGIC3     | 1.0097 | 1.6606 | 1.1061 | 0.8063 | 1.1457 | 0.1827 |
| SHBG       | 1.1724 | 1.2981 | 1.2355 | 0.8767 | 1.1457 | 0.0933 |
| FAM46A     | 1.0610 | 1.2981 | 1.1098 | 1.1153 | 1.1460 | 0.0521 |
| MAPK8IP1   | 1.1427 | 1.4313 | 1.1274 | 0.8829 | 1.1461 | 0.1122 |
| SERTAD3    | 1.0897 | 1.4652 | 1.0831 | 0.9464 | 1.1461 | 0.1114 |
| ANKRD12    | 1.1164 | 1.3558 | 1.2239 | 0.8883 | 1.1461 | 0.0989 |
| C6orf47    | 1.2888 | 1.4656 | 1.0844 | 0.7460 | 1.1462 | 0.1545 |
| LOC149134  | 1.0671 | 1.4642 | 1.2397 | 0.8143 | 1.1463 | 0.1373 |
| SNORA12    | 0.8983 | 1.2961 | 1.5457 | 0.8453 | 1.1464 | 0.1668 |
| TNFRSF10B  | 1.1631 | 1.4835 | 1.1872 | 0.7517 | 1.1464 | 0.1504 |
| TMED3      | 1.0279 | 1.4514 | 1.3231 | 0.7840 | 1.1466 | 0.1499 |
| ARHGEF9    | 1.0744 | 1.2973 | 1.2288 | 0.9876 | 1.1470 | 0.0707 |
| AHCYL1     | 1.0547 | 1.5621 | 1.0868 | 0.8847 | 1.1471 | 0.1453 |
| DECR1      | 1.1434 | 1.5751 | 1.0918 | 0.7800 | 1.1476 | 0.1636 |
| SCMH1      | 1.0362 | 1.6092 | 1.1153 | 0.8299 | 1.1476 | 0.1652 |
| CD46       | 0.8634 | 1.7396 | 1.1858 | 0.8021 | 1.1477 | 0.2145 |
| TRIB1      | 1.1108 | 1.4194 | 1.2090 | 0.8523 | 1.1479 | 0.1177 |
| ITFG1      | 1.2212 | 1.5000 | 1.1277 | 0.7439 | 1.1482 | 0.1562 |
| ZNF415     | 1.1403 | 1.4247 | 1.2754 | 0.7540 | 1.1486 | 0.1438 |
| ZNF322A    | 1.2835 | 1.4183 | 1.1553 | 0.7386 | 1.1489 | 0.1469 |
| BRP44      | 0.9292 | 1.4914 | 1.3672 | 0.8085 | 1.1491 | 0.1656 |
| KLHL26     | 1.1180 | 1.4976 | 1.1153 | 0.8655 | 1.1491 | 0.1304 |
| MEF2D      | 1.2121 | 1.5777 | 0.9092 | 0.8975 | 1.1491 | 0.1603 |
| SLC44A3    | 1.1731 | 1.4370 | 1.1352 | 0.8531 | 1.1496 | 0.1195 |
| LOC1001280 | 0.9907 | 1.3605 | 1.5402 | 0.7081 | 1.1499 | 0.1865 |
| GOLGA3     | 1.1696 | 1.5305 | 1.0382 | 0.8612 | 1.1499 | 0.1417 |
| LOC645669  | 1.1288 | 1.2984 | 1.1403 | 1.0324 | 1.1500 | 0.0551 |
| LOC643031  | 0.9399 | 1.5771 | 1.1851 | 0.9010 | 1.1508 | 0.1554 |
| ACYP2      | 1.1952 | 1.3399 | 1.2309 | 0.8378 | 1.1510 | 0.1088 |
| HOXC6      | 1.1686 | 1.5121 | 1.2057 | 0.7175 | 1.1510 | 0.1637 |
| ZFP90      | 0.9096 | 1.7623 | 1.1364 | 0.7970 | 1.1513 | 0.2155 |
| RIMS1      | 1.1126 | 1.2651 | 1.2219 | 1.0058 | 1.1514 | 0.0582 |
| TPRG1L     | 0.8899 | 1.7107 | 1.1536 | 0.8519 | 1.1515 | 0.1981 |
| ACO2       | 0.9235 | 1.6511 | 1.3771 | 0.6546 | 1.1516 | 0.2235 |
| PIGQ       | 1.0942 | 1.7213 | 1.1153 | 0.6760 | 1.1517 | 0.2151 |
| MECP2      | 1.3519 | 1.5523 | 1.0250 | 0.6793 | 1.1521 | 0.1914 |
| PXMP3      | 0.9819 | 1.7242 | 1.1344 | 0.7683 | 1.1522 | 0.2049 |
| MAP1LC3A   | 1.0448 | 1.5714 | 1.1393 | 0.8536 | 1.1523 | 0.1518 |

|            |        |        |        |        |        |        |
|------------|--------|--------|--------|--------|--------|--------|
| PYGB       | 1.1039 | 1.7446 | 1.0226 | 0.7388 | 1.1525 | 0.2123 |
| JUND       | 1.0905 | 1.4184 | 1.2458 | 0.8559 | 1.1526 | 0.1194 |
| PTPN21     | 1.0721 | 1.4021 | 1.2482 | 0.8902 | 1.1532 | 0.1106 |
| LOC648622  | 0.9088 | 1.5211 | 1.5164 | 0.6676 | 1.1535 | 0.2166 |
| RNF185     | 1.1502 | 1.3871 | 1.2932 | 0.7834 | 1.1535 | 0.1326 |
| ZNF613     | 1.3326 | 1.3925 | 1.1031 | 0.7863 | 1.1536 | 0.1374 |
| ERCC-00054 | 1.5126 | 1.0785 | 1.0901 | 0.9344 | 1.1539 | 0.1247 |
| C1orf24    | 1.1039 | 1.6307 | 1.0572 | 0.8242 | 1.1540 | 0.1703 |
| THAP6      | 1.1805 | 1.5712 | 1.1148 | 0.7496 | 1.1540 | 0.1683 |
| RPS4X      | 1.0626 | 1.6174 | 1.1867 | 0.7500 | 1.1542 | 0.1796 |
| MICA       | 1.0945 | 1.6345 | 1.1740 | 0.7154 | 1.1546 | 0.1887 |
| RABEP1     | 1.2404 | 1.4618 | 1.1683 | 0.7482 | 1.1547 | 0.1492 |
| CPS1       | 1.1714 | 1.3564 | 1.2620 | 0.8293 | 1.1548 | 0.1149 |
| C1orf66    | 1.1947 | 1.4107 | 1.1313 | 0.8827 | 1.1548 | 0.1086 |
| CCDC102A   | 1.2189 | 1.6059 | 0.9697 | 0.8255 | 1.1550 | 0.1708 |
| GHITM      | 0.8773 | 1.9041 | 1.0778 | 0.7611 | 1.1551 | 0.2581 |
| SAR1B      | 1.0953 | 1.3667 | 1.4154 | 0.7434 | 1.1552 | 0.1543 |
| LOC642590  | 1.2150 | 1.7315 | 0.9594 | 0.7154 | 1.1553 | 0.2175 |
| ZBTB22     | 1.1913 | 1.5648 | 1.0431 | 0.8226 | 1.1554 | 0.1561 |
| PKIB       | 0.9502 | 1.6921 | 1.1754 | 0.8044 | 1.1556 | 0.1944 |
| PIK3R1     | 0.9953 | 1.5693 | 1.2869 | 0.7709 | 1.1556 | 0.1737 |
| ACAT1      | 0.9584 | 1.7442 | 1.2255 | 0.6949 | 1.1558 | 0.2241 |
| ZNF160     | 1.2412 | 1.3227 | 1.1315 | 0.9278 | 1.1558 | 0.0855 |
| CLK3       | 1.1409 | 1.6323 | 0.9975 | 0.8535 | 1.1561 | 0.1693 |
| NINJ1      | 0.9523 | 1.6608 | 1.2126 | 0.7986 | 1.1561 | 0.1887 |
| TMEM167B   | 1.1620 | 1.7638 | 1.0968 | 0.6022 | 1.1562 | 0.2380 |
| TMCO1      | 0.8608 | 2.0245 | 1.0376 | 0.7021 | 1.1562 | 0.2974 |
| CRY2       | 1.0976 | 1.5144 | 1.2758 | 0.7372 | 1.1562 | 0.1637 |
| KIAA0494   | 1.0267 | 1.7542 | 1.0961 | 0.7481 | 1.1563 | 0.2130 |
| MFSD6      | 1.1313 | 1.5549 | 1.0871 | 0.8518 | 1.1563 | 0.1463 |
| ZNF540     | 1.1225 | 1.3844 | 1.1992 | 0.9203 | 1.1566 | 0.0961 |
| CAMK2B     | 1.1321 | 1.5112 | 1.1388 | 0.8451 | 1.1568 | 0.1365 |
| RCOR3      | 1.0052 | 1.6390 | 1.1750 | 0.8082 | 1.1569 | 0.1773 |
| MPZL1      | 1.0788 | 1.6038 | 1.1676 | 0.7781 | 1.1570 | 0.1706 |
| RINL       | 1.0035 | 1.3706 | 1.3082 | 0.9463 | 1.1571 | 0.1066 |
| TANC1      | 1.0593 | 1.5160 | 1.2728 | 0.7807 | 1.1572 | 0.1564 |
| FLJ46257   | 1.2385 | 1.3059 | 1.1812 | 0.9035 | 1.1573 | 0.0884 |
| TMEM88     | 1.2255 | 1.3145 | 1.1651 | 0.9244 | 1.1573 | 0.0835 |
| SLC41A1    | 1.6290 | 1.2610 | 0.9175 | 0.8223 | 1.1575 | 0.1833 |
| ITM2B      | 1.0001 | 1.5334 | 1.3218 | 0.7745 | 1.1575 | 0.1683 |
| LOC730278  | 1.0100 | 1.5575 | 1.4491 | 0.6153 | 1.1580 | 0.2162 |
| CA13       | 0.9128 | 1.4575 | 1.2509 | 1.0125 | 1.1584 | 0.1224 |
| PSD4       | 1.1880 | 1.5786 | 1.0171 | 0.8503 | 1.1585 | 0.1561 |
| SLC2A12    | 0.9856 | 1.5495 | 1.3309 | 0.7682 | 1.1585 | 0.1744 |
| HMG20B     | 1.0458 | 1.9237 | 0.9895 | 0.6752 | 1.1586 | 0.2678 |
| TMEM47     | 1.0879 | 1.3692 | 1.3246 | 0.8529 | 1.1586 | 0.1192 |

|            |        |        |        |        |        |        |
|------------|--------|--------|--------|--------|--------|--------|
| AHNAK2     | 0.9735 | 1.4424 | 1.0916 | 1.1272 | 1.1587 | 0.1001 |
| VAMP2      | 1.2040 | 1.4472 | 1.1059 | 0.8781 | 1.1588 | 0.1179 |
| KLHL35     | 1.0851 | 1.4476 | 1.2069 | 0.8958 | 1.1588 | 0.1156 |
| BTBD6      | 0.8969 | 1.8078 | 1.1334 | 0.7972 | 1.1589 | 0.2275 |
| SERF1B     | 1.0772 | 1.6778 | 1.0863 | 0.7944 | 1.1589 | 0.1858 |
| ZCCHC24    | 1.2529 | 1.4484 | 1.0385 | 0.8962 | 1.1590 | 0.1211 |
| MMEL1      | 1.1538 | 1.5855 | 1.0008 | 0.8960 | 1.1590 | 0.1517 |
| AP1B1      | 1.0533 | 1.7509 | 1.1254 | 0.7074 | 1.1593 | 0.2173 |
| AHR        | 0.8879 | 1.6318 | 1.3318 | 0.7864 | 1.1595 | 0.1970 |
| PSCD1      | 1.3440 | 1.4066 | 1.0796 | 0.8086 | 1.1597 | 0.1368 |
| SGK        | 1.3014 | 1.3284 | 1.0731 | 0.9361 | 1.1597 | 0.0940 |
| C8orf83    | 1.1512 | 1.6662 | 1.0679 | 0.7539 | 1.1598 | 0.1892 |
| CECR7      | 1.2117 | 1.4355 | 1.0531 | 0.9390 | 1.1598 | 0.1076 |
| C1orf122   | 1.2223 | 1.5410 | 1.1932 | 0.6834 | 1.1600 | 0.1773 |
| SLC39A8    | 0.9319 | 1.5082 | 1.4552 | 0.7453 | 1.1601 | 0.1898 |
| KLK15      | 1.0828 | 1.4391 | 1.2382 | 0.8805 | 1.1602 | 0.1184 |
| RAB11A     | 1.1951 | 1.5101 | 1.0505 | 0.8854 | 1.1603 | 0.1327 |
| WASH5P     | 1.1679 | 1.4540 | 1.1679 | 0.8523 | 1.1605 | 0.1229 |
| LOC645381  | 1.0632 | 1.4929 | 1.2830 | 0.8034 | 1.1606 | 0.1479 |
| TSC22D2    | 0.9939 | 1.6106 | 1.2258 | 0.8122 | 1.1606 | 0.1722 |
| ZNF812     | 1.1045 | 1.3407 | 1.2188 | 0.9786 | 1.1607 | 0.0775 |
| OCRL       | 1.2171 | 1.4822 | 1.0485 | 0.8949 | 1.1607 | 0.1258 |
| TAOK1      | 1.2309 | 1.4399 | 0.9666 | 1.0055 | 1.1607 | 0.1098 |
| LOC1001293 | 0.9322 | 1.4207 | 1.5444 | 0.7463 | 1.1609 | 0.1912 |
| SLFN5      | 1.1381 | 1.4937 | 1.0746 | 0.9375 | 1.1610 | 0.1185 |
| MAN2B2     | 1.1797 | 1.4453 | 1.2547 | 0.7642 | 1.1610 | 0.1436 |
| DDAH2      | 1.4260 | 1.5463 | 0.8940 | 0.7778 | 1.1610 | 0.1908 |
| RPS6KC1    | 1.1435 | 1.5104 | 1.1289 | 0.8620 | 1.1612 | 0.1332 |
| BECN1      | 0.9099 | 1.6222 | 1.2328 | 0.8799 | 1.1612 | 0.1732 |
| GPAA1      | 1.0439 | 1.6096 | 1.1457 | 0.8459 | 1.1613 | 0.1619 |
| SH3GL3     | 0.9021 | 1.4953 | 1.3352 | 0.9128 | 1.1613 | 0.1502 |
| ATP6V1E1   | 1.0128 | 1.7252 | 1.1235 | 0.7839 | 1.1614 | 0.2008 |
| GPR37      | 0.9375 | 1.5368 | 1.3557 | 0.8157 | 1.1614 | 0.1704 |
| SLC25A21   | 0.9950 | 1.5390 | 1.1800 | 0.9327 | 1.1617 | 0.1363 |
| BCL7B      | 1.1263 | 1.4187 | 1.2439 | 0.8580 | 1.1617 | 0.1177 |
| SNX2       | 0.9183 | 1.6266 | 1.2856 | 0.8191 | 1.1624 | 0.1844 |
| AP2M1      | 1.1933 | 1.5445 | 1.1325 | 0.7794 | 1.1624 | 0.1567 |
| EDEM1      | 1.2897 | 1.4199 | 1.0755 | 0.8646 | 1.1624 | 0.1220 |
| LOC124220  | 1.4725 | 1.4375 | 0.9931 | 0.7470 | 1.1625 | 0.1763 |
| LMBRD2     | 1.0334 | 1.5396 | 1.2380 | 0.8408 | 1.1629 | 0.1494 |
| LOC729402  | 1.1552 | 1.3747 | 1.1581 | 0.9667 | 1.1637 | 0.0834 |
| ASIP       | 1.2094 | 1.3849 | 1.2368 | 0.8240 | 1.1637 | 0.1196 |
| POLD4      | 1.2376 | 1.6637 | 0.9155 | 0.8383 | 1.1638 | 0.1877 |
| LOC731777  | 0.8478 | 2.0857 | 0.9857 | 0.7358 | 1.1638 | 0.3115 |
| PLA2G7     | 1.0744 | 1.4259 | 1.1975 | 0.9574 | 1.1638 | 0.1002 |
| LOC644919  | 1.1544 | 1.3737 | 1.2505 | 0.8769 | 1.1639 | 0.1057 |

|           |        |        |        |        |        |        |
|-----------|--------|--------|--------|--------|--------|--------|
| SPINK2    | 1.0679 | 1.1367 | 1.4150 | 1.0362 | 1.1640 | 0.0863 |
| PGLYRP2   | 1.1982 | 1.3537 | 1.1224 | 0.9817 | 1.1640 | 0.0775 |
| ST14      | 1.0570 | 1.8084 | 1.0253 | 0.7656 | 1.1641 | 0.2245 |
| GBA2      | 1.1080 | 1.5763 | 1.1689 | 0.8045 | 1.1644 | 0.1587 |
| BCAP29    | 1.1548 | 1.4505 | 1.2980 | 0.7555 | 1.1647 | 0.1492 |
| FASN      | 1.1800 | 1.5399 | 1.1906 | 0.7483 | 1.1647 | 0.1620 |
| TMEM9B    | 1.0078 | 1.5358 | 1.2834 | 0.8332 | 1.1651 | 0.1545 |
| C15orf17  | 1.0817 | 1.6151 | 1.1080 | 0.8565 | 1.1653 | 0.1602 |
| ZDHHC5    | 1.1385 | 1.6932 | 1.0201 | 0.8098 | 1.1654 | 0.1886 |
| ADD3      | 0.9475 | 1.4912 | 1.4860 | 0.7374 | 1.1656 | 0.1914 |
| PTGR1     | 0.8989 | 1.8030 | 1.1355 | 0.8253 | 1.1657 | 0.2225 |
| S1PR3     | 1.1059 | 1.5292 | 1.1885 | 0.8394 | 1.1657 | 0.1422 |
| ZNF274    | 0.9857 | 1.7067 | 1.1405 | 0.8303 | 1.1658 | 0.1911 |
| ADH1A     | 1.0218 | 1.3164 | 1.4600 | 0.8651 | 1.1658 | 0.1355 |
| NDST1     | 1.3048 | 1.6248 | 0.8528 | 0.8819 | 1.1661 | 0.1845 |
| FLJ33630  | 1.1660 | 1.4493 | 1.1731 | 0.8760 | 1.1661 | 0.1170 |
| KNG1      | 1.0430 | 1.4747 | 1.1613 | 0.9856 | 1.1661 | 0.1091 |
| ASB1      | 1.0674 | 1.5765 | 1.1057 | 0.9156 | 1.1663 | 0.1428 |
| KLC1      | 0.9942 | 1.6788 | 1.2131 | 0.7792 | 1.1663 | 0.1924 |
| LOC643263 | 1.0677 | 1.2630 | 1.3629 | 0.9719 | 1.1664 | 0.0892 |
| GRN       | 1.2058 | 1.6250 | 1.1115 | 0.7233 | 1.1664 | 0.1851 |
| GPR56     | 1.1636 | 1.5650 | 1.1438 | 0.7935 | 1.1665 | 0.1577 |
| AKR1C3    | 1.1948 | 1.2756 | 1.2286 | 0.9677 | 1.1667 | 0.0684 |
| VASN      | 0.9062 | 1.6701 | 1.1484 | 0.9424 | 1.1668 | 0.1760 |
| STK39     | 1.0935 | 1.7064 | 1.0890 | 0.7787 | 1.1669 | 0.1943 |
| NKIRAS1   | 0.9151 | 1.7669 | 1.2487 | 0.7370 | 1.1669 | 0.2264 |
| ZNF629    | 1.2663 | 1.4289 | 1.0669 | 0.9063 | 1.1671 | 0.1142 |
| FADS2     | 1.0973 | 1.6693 | 1.1745 | 0.7283 | 1.1673 | 0.1936 |
| IDS       | 1.0250 | 1.5155 | 1.3009 | 0.8287 | 1.1675 | 0.1511 |
| PIGG      | 1.0003 | 1.7823 | 1.1088 | 0.7792 | 1.1677 | 0.2161 |
| NAPEPLD   | 1.1409 | 1.5295 | 1.2338 | 0.7673 | 1.1679 | 0.1572 |
| CDIPT     | 1.0125 | 1.6817 | 1.1903 | 0.7872 | 1.1679 | 0.1901 |
| CCPG1     | 1.1455 | 1.4853 | 1.1652 | 0.8776 | 1.1684 | 0.1243 |
| RAB7A     | 0.9646 | 2.0093 | 1.0232 | 0.6767 | 1.1685 | 0.2903 |
| SDF2      | 1.0905 | 1.7038 | 1.1477 | 0.7323 | 1.1686 | 0.2007 |
| TMEM134   | 1.2465 | 1.6304 | 1.0526 | 0.7449 | 1.1686 | 0.1854 |
| KLF13     | 1.3682 | 1.5370 | 1.0825 | 0.6893 | 1.1693 | 0.1855 |
| PCSK7     | 0.9692 | 1.7099 | 1.0989 | 0.8991 | 1.1693 | 0.1849 |
| TMCO4     | 1.3330 | 1.1968 | 1.2315 | 0.9163 | 1.1694 | 0.0892 |
| ZDHHC7    | 1.1601 | 1.6005 | 1.0045 | 0.9129 | 1.1695 | 0.1524 |
| TUBG2     | 1.0155 | 1.7990 | 1.0281 | 0.8356 | 1.1696 | 0.2144 |
| PPP2R5A   | 1.1424 | 1.5679 | 1.1298 | 0.8400 | 1.1700 | 0.1499 |
| FGGY      | 1.0949 | 1.6821 | 1.1878 | 0.7157 | 1.1701 | 0.1989 |
| GATS      | 1.1641 | 1.3428 | 1.1786 | 1.0012 | 1.1717 | 0.0698 |
| PPP3CB    | 1.1753 | 1.6188 | 1.0531 | 0.8408 | 1.1720 | 0.1642 |
| PPFIBP2   | 0.9511 | 1.6646 | 1.2427 | 0.8300 | 1.1721 | 0.1856 |

|            |        |        |        |        |        |        |
|------------|--------|--------|--------|--------|--------|--------|
| SLC27A1    | 1.1500 | 1.5795 | 1.0971 | 0.8624 | 1.1723 | 0.1494 |
| HN1L       | 1.0748 | 1.7040 | 0.9932 | 0.9172 | 1.1723 | 0.1801 |
| KIF5C      | 1.1479 | 1.3415 | 1.2748 | 0.9254 | 1.1724 | 0.0916 |
| FLJ41603   | 1.2597 | 1.5593 | 1.0317 | 0.8395 | 1.1725 | 0.1549 |
| C10orf81   | 1.0914 | 1.2749 | 1.3456 | 0.9787 | 1.1726 | 0.0839 |
| ENSA       | 0.9697 | 1.9129 | 1.1020 | 0.7060 | 1.1727 | 0.2601 |
| ASB8       | 0.9975 | 1.8047 | 1.0733 | 0.8151 | 1.1727 | 0.2175 |
| SLC41A3    | 1.2719 | 1.4998 | 1.1340 | 0.7855 | 1.1728 | 0.1495 |
| C1orf149   | 1.0158 | 1.7767 | 1.1800 | 0.7197 | 1.1731 | 0.2226 |
| RLN2       | 1.2188 | 1.3183 | 1.2276 | 0.9276 | 1.1731 | 0.0848 |
| TMEM63B    | 1.2474 | 1.5318 | 1.0934 | 0.8204 | 1.1732 | 0.1486 |
| CCDC128    | 1.2250 | 1.4295 | 1.2309 | 0.8083 | 1.1734 | 0.1306 |
| DSCR3      | 1.1369 | 1.7229 | 1.1290 | 0.7052 | 1.1735 | 0.2091 |
| FBXL17     | 1.0236 | 1.7552 | 1.0141 | 0.9032 | 1.1740 | 0.1956 |
| GGT1       | 1.1233 | 1.4382 | 1.1949 | 0.9397 | 1.1740 | 0.1032 |
| ZNF410     | 1.1380 | 1.6905 | 1.0556 | 0.8125 | 1.1742 | 0.1855 |
| NCAM2      | 1.0931 | 1.6227 | 1.1523 | 0.8292 | 1.1743 | 0.1651 |
| C5orf30    | 1.0112 | 1.7046 | 1.2246 | 0.7576 | 1.1745 | 0.2008 |
| TSTD1      | 1.3355 | 1.4711 | 1.1191 | 0.7724 | 1.1745 | 0.1524 |
| SLC15A2    | 1.1693 | 1.4016 | 1.2475 | 0.8801 | 1.1746 | 0.1094 |
| SCD5       | 1.2727 | 1.4981 | 1.0250 | 0.9029 | 1.1747 | 0.1324 |
| NUDCD3     | 1.2982 | 1.3595 | 1.1571 | 0.8840 | 1.1747 | 0.1058 |
| PCNXL2     | 1.1520 | 1.3663 | 1.1606 | 1.0200 | 1.1747 | 0.0715 |
| RAB4A      | 1.2710 | 1.5610 | 1.1597 | 0.7075 | 1.1748 | 0.1773 |
| RIPK4      | 1.0468 | 1.6881 | 0.9910 | 0.9739 | 1.1749 | 0.1718 |
| ZMAT2      | 1.0383 | 1.7558 | 1.0618 | 0.8456 | 1.1754 | 0.1995 |
| ZBTB5      | 0.9898 | 1.8368 | 1.0358 | 0.8399 | 1.1756 | 0.2243 |
| BCL8       | 0.9992 | 1.4236 | 1.4417 | 0.8382 | 1.1757 | 0.1520 |
| RAB3B      | 1.2899 | 1.5630 | 1.1346 | 0.7155 | 1.1758 | 0.1771 |
| LOC1001310 | 1.1973 | 1.2963 | 1.3033 | 0.9064 | 1.1758 | 0.0930 |
| C1orf21    | 1.2516 | 1.5845 | 1.0738 | 0.7938 | 1.1759 | 0.1656 |
| CYTH2      | 1.2523 | 1.5946 | 0.9342 | 0.9247 | 1.1764 | 0.1588 |
| LOC653108  | 1.1300 | 1.4881 | 1.2909 | 0.7969 | 1.1765 | 0.1462 |
| CTTN       | 1.1969 | 1.5614 | 1.1129 | 0.8350 | 1.1766 | 0.1498 |
| ST3GAL5    | 1.3186 | 1.4126 | 1.1387 | 0.8364 | 1.1766 | 0.1268 |
| UBXN4      | 1.0359 | 1.6875 | 1.1122 | 0.8713 | 1.1767 | 0.1775 |
| NPC2       | 0.9909 | 1.6843 | 1.1545 | 0.8780 | 1.1769 | 0.1784 |
| HADHA      | 1.0519 | 1.6576 | 1.1228 | 0.8757 | 1.1770 | 0.1684 |
| FECH       | 1.1577 | 1.7591 | 1.1290 | 0.6629 | 1.1772 | 0.2247 |
| TRIM44     | 1.1605 | 1.7537 | 1.0131 | 0.7816 | 1.1772 | 0.2074 |
| CADM2      | 1.1491 | 1.3172 | 1.3148 | 0.9280 | 1.1773 | 0.0919 |
| GLTSCR1    | 1.1908 | 1.5233 | 1.1188 | 0.8763 | 1.1773 | 0.1335 |
| PLXNB2     | 1.1620 | 1.6057 | 1.0612 | 0.8804 | 1.1773 | 0.1542 |
| LOC729580  | 1.1082 | 1.7755 | 1.1436 | 0.6838 | 1.1778 | 0.2250 |
| ISCU       | 1.0500 | 1.6756 | 1.1221 | 0.8636 | 1.1778 | 0.1746 |
| CHRNA2     | 1.2820 | 1.3784 | 1.0222 | 1.0304 | 1.1782 | 0.0899 |

|            |        |        |        |        |        |        |
|------------|--------|--------|--------|--------|--------|--------|
| LOC286512  | 0.9065 | 1.3963 | 1.7183 | 0.6921 | 1.1783 | 0.2326 |
| FAM115A    | 1.0600 | 1.7282 | 1.1450 | 0.7804 | 1.1784 | 0.1991 |
| FLJ36131   | 1.0618 | 1.3627 | 1.4780 | 0.8124 | 1.1787 | 0.1504 |
| RP2        | 1.0792 | 1.5911 | 1.2442 | 0.8006 | 1.1788 | 0.1651 |
| PPP1R3F    | 1.2151 | 1.3811 | 1.1749 | 0.9446 | 1.1789 | 0.0900 |
| DYRK4      | 0.9616 | 1.5749 | 1.3751 | 0.8042 | 1.1789 | 0.1786 |
| MED20      | 1.2055 | 1.5000 | 1.1240 | 0.8871 | 1.1791 | 0.1265 |
| WDR44      | 1.0112 | 1.4487 | 1.3611 | 0.8962 | 1.1793 | 0.1336 |
| NAP1L3     | 1.2298 | 1.3576 | 1.4450 | 0.6863 | 1.1797 | 0.1703 |
| GCA        | 1.0263 | 1.7080 | 1.2226 | 0.7623 | 1.1798 | 0.1997 |
| TBX3       | 1.1085 | 1.6971 | 1.2256 | 0.6892 | 1.1801 | 0.2073 |
| BBS1       | 1.4701 | 1.5097 | 0.9423 | 0.7993 | 1.1803 | 0.1813 |
| TRAK2      | 1.2246 | 1.8296 | 1.0082 | 0.6595 | 1.1805 | 0.2457 |
| TP53I13    | 1.1336 | 1.6178 | 1.0342 | 0.9366 | 1.1806 | 0.1512 |
| CLSTN1     | 1.2188 | 1.5397 | 1.1655 | 0.7994 | 1.1809 | 0.1516 |
| LOC650276  | 1.1028 | 1.7163 | 1.1922 | 0.7122 | 1.1809 | 0.2067 |
| ZNF618     | 1.2689 | 1.3862 | 1.2301 | 0.8411 | 1.1816 | 0.1183 |
| TOLLIP     | 1.2079 | 1.6621 | 1.0291 | 0.8283 | 1.1819 | 0.1779 |
| NENF       | 0.9767 | 1.6377 | 1.2734 | 0.8404 | 1.1821 | 0.1767 |
| BRD2       | 1.1183 | 1.6175 | 1.1912 | 0.8025 | 1.1824 | 0.1678 |
| NRD1       | 1.0641 | 1.8390 | 1.1173 | 0.7093 | 1.1824 | 0.2369 |
| LOC1001300 | 1.0056 | 1.3809 | 1.6393 | 0.7038 | 1.1824 | 0.2058 |
| KRCC1      | 1.1966 | 1.3301 | 1.3241 | 0.8789 | 1.1824 | 0.1058 |
| WDR37      | 1.1287 | 1.5302 | 1.2421 | 0.8292 | 1.1825 | 0.1450 |
| MAPK10     | 1.1139 | 1.3776 | 1.2652 | 0.9736 | 1.1826 | 0.0882 |
| TMEM2      | 1.1444 | 1.5141 | 1.1994 | 0.8729 | 1.1827 | 0.1315 |
| IFIT2      | 1.0679 | 1.6582 | 1.2136 | 0.7913 | 1.1828 | 0.1811 |
| LOC729926  | 1.0717 | 1.5436 | 1.3007 | 0.8150 | 1.1828 | 0.1559 |
| ZBTB20     | 1.1203 | 1.3788 | 1.2963 | 0.9359 | 1.1828 | 0.0984 |
| C7orf13    | 1.2672 | 1.5044 | 1.0821 | 0.8786 | 1.1831 | 0.1333 |
| LNX2       | 1.1659 | 1.4139 | 1.3877 | 0.7649 | 1.1831 | 0.1501 |
| KLHL28     | 0.8134 | 1.9032 | 1.1438 | 0.8722 | 1.1831 | 0.2506 |
| CIRBP      | 0.9942 | 1.8372 | 1.1174 | 0.7850 | 1.1835 | 0.2285 |
| TNRC6B     | 0.9870 | 1.8189 | 1.0369 | 0.8922 | 1.1838 | 0.2138 |
| NOSTRIN    | 1.2869 | 1.4361 | 1.1654 | 0.8477 | 1.1840 | 0.1250 |
| FAM168B    | 1.1453 | 1.7424 | 1.0117 | 0.8375 | 1.1842 | 0.1964 |
| TFPI       | 0.9535 | 1.5710 | 1.4834 | 0.7292 | 1.1843 | 0.2040 |
| HIBCH      | 1.1138 | 1.6548 | 1.1712 | 0.7980 | 1.1844 | 0.1770 |
| C1orf106   | 1.2903 | 1.4084 | 1.1928 | 0.8468 | 1.1846 | 0.1209 |
| DUSP8      | 0.9733 | 1.6604 | 1.2099 | 0.8961 | 1.1849 | 0.1720 |
| CCDC47     | 1.0266 | 1.8269 | 1.0958 | 0.7906 | 1.1850 | 0.2237 |
| PRRG2      | 1.2560 | 1.6771 | 1.0292 | 0.7779 | 1.1850 | 0.1909 |
| FAM65B     | 1.0791 | 1.3884 | 1.3668 | 0.9077 | 1.1855 | 0.1164 |
| FAM43A     | 1.1571 | 1.5361 | 1.1104 | 0.9385 | 1.1855 | 0.1259 |
| RICS       | 1.2045 | 1.6756 | 1.0556 | 0.8069 | 1.1856 | 0.1827 |
| PAFAH1B1   | 1.1220 | 1.6283 | 1.0949 | 0.8979 | 1.1858 | 0.1557 |

|            |        |        |        |        |        |        |
|------------|--------|--------|--------|--------|--------|--------|
| PMM1       | 1.1952 | 1.5809 | 1.0642 | 0.9034 | 1.1859 | 0.1445 |
| NWD1       | 1.0433 | 1.4292 | 1.2377 | 1.0342 | 1.1861 | 0.0937 |
| EEPD1      | 1.0472 | 1.6834 | 1.1982 | 0.8158 | 1.1861 | 0.1834 |
| CYTH1      | 1.2029 | 1.5230 | 1.1323 | 0.8872 | 1.1864 | 0.1310 |
| LOC340970  | 1.3610 | 1.3261 | 1.0940 | 0.9648 | 1.1865 | 0.0947 |
| CBWD7      | 1.1545 | 1.4393 | 1.2131 | 0.9403 | 1.1868 | 0.1026 |
| SEMA3C     | 1.2127 | 1.4693 | 1.2383 | 0.8277 | 1.1870 | 0.1329 |
| LOC645094  | 1.1005 | 1.4280 | 1.3955 | 0.8241 | 1.1870 | 0.1416 |
| OAZ2       | 1.1497 | 1.8570 | 0.9678 | 0.7744 | 1.1872 | 0.2360 |
| CAB39L     | 0.9692 | 1.7157 | 1.2463 | 0.8195 | 1.1877 | 0.1970 |
| TTPAL      | 1.1513 | 1.6187 | 1.0251 | 0.9558 | 1.1877 | 0.1493 |
| LOC644186  | 1.0396 | 1.7691 | 1.1220 | 0.8220 | 1.1882 | 0.2037 |
| CKB        | 1.2328 | 1.5518 | 1.1549 | 0.8148 | 1.1886 | 0.1513 |
| TMC6       | 1.3324 | 1.6039 | 1.0624 | 0.7571 | 1.1890 | 0.1815 |
| TMEM219    | 1.1122 | 1.6546 | 1.1194 | 0.8699 | 1.1890 | 0.1657 |
| NAPB       | 1.1245 | 1.5896 | 1.0761 | 0.9672 | 1.1894 | 0.1374 |
| GLTSCR2    | 1.0280 | 1.7980 | 1.1244 | 0.8076 | 1.1895 | 0.2134 |
| GGPS1      | 1.0783 | 1.6632 | 1.2096 | 0.8074 | 1.1896 | 0.1787 |
| FBXL5      | 1.0846 | 1.7701 | 1.1385 | 0.7658 | 1.1898 | 0.2102 |
| PLD3       | 1.2275 | 1.4816 | 1.1614 | 0.8901 | 1.1902 | 0.1215 |
| AP1S2      | 1.4214 | 1.4397 | 1.0643 | 0.8352 | 1.1902 | 0.1465 |
| TEX2       | 1.1742 | 1.5582 | 1.2956 | 0.7330 | 1.1902 | 0.1722 |
| MICAL1     | 1.4147 | 1.4670 | 1.0279 | 0.8516 | 1.1903 | 0.1494 |
| AKR7A2     | 1.0741 | 1.7140 | 1.1302 | 0.8442 | 1.1906 | 0.1851 |
| RANBP10    | 1.2772 | 1.7736 | 1.0513 | 0.6637 | 1.1915 | 0.2317 |
| GOLT1A     | 1.2149 | 1.6394 | 1.1462 | 0.7661 | 1.1917 | 0.1789 |
| FAM120AOS  | 1.2458 | 1.5619 | 1.2237 | 0.7378 | 1.1923 | 0.1701 |
| LOC1001296 | 1.0924 | 1.7529 | 1.1192 | 0.8047 | 1.1923 | 0.2000 |
| RELN       | 1.0963 | 1.4487 | 1.2463 | 0.9780 | 1.1923 | 0.1016 |
| CSAG3A     | 1.0222 | 1.6840 | 1.2646 | 0.7999 | 1.1927 | 0.1893 |
| SCAP       | 0.9950 | 1.7334 | 1.1542 | 0.8889 | 1.1929 | 0.1882 |
| TCEB3      | 1.2266 | 1.6211 | 1.1368 | 0.7874 | 1.1929 | 0.1713 |
| KIAA1244   | 1.3223 | 1.4136 | 1.2311 | 0.8058 | 1.1932 | 0.1344 |
| ZNF337     | 1.1788 | 1.5688 | 1.1436 | 0.8820 | 1.1933 | 0.1416 |
| PCDHB5     | 1.1949 | 1.5631 | 1.1061 | 0.9092 | 1.1933 | 0.1369 |
| SERINC2    | 1.2455 | 1.5456 | 1.0959 | 0.8869 | 1.1934 | 0.1385 |
| C12orf60   | 0.9564 | 1.5934 | 1.3553 | 0.8688 | 1.1935 | 0.1702 |
| RBM15B     | 1.2988 | 1.5058 | 1.0379 | 0.9314 | 1.1935 | 0.1296 |
| RAD54L2    | 1.2452 | 1.5891 | 1.0517 | 0.8881 | 1.1935 | 0.1507 |
| SLC25A44   | 1.2566 | 1.4833 | 1.3135 | 0.7211 | 1.1936 | 0.1647 |
| LOC729279  | 1.1032 | 1.7035 | 1.2893 | 0.6795 | 1.1939 | 0.2124 |
| LOC646463  | 1.0311 | 1.6917 | 1.3984 | 0.6546 | 1.1940 | 0.2249 |
| GATA2      | 1.2912 | 1.5608 | 1.0844 | 0.8400 | 1.1941 | 0.1531 |
| BAX        | 1.1477 | 1.5465 | 1.1685 | 0.9141 | 1.1942 | 0.1308 |
| LOC440704  | 1.0676 | 1.3831 | 1.5498 | 0.7765 | 1.1943 | 0.1714 |
| SLC22A17   | 1.1926 | 1.4573 | 1.2223 | 0.9055 | 1.1944 | 0.1130 |



|           |        |        |        |        |        |        |
|-----------|--------|--------|--------|--------|--------|--------|
| UBA1      | 1.1168 | 1.6548 | 1.1549 | 0.8515 | 1.1945 | 0.1676 |
| EVL       | 1.0128 | 1.7628 | 1.1823 | 0.8219 | 1.1949 | 0.2031 |
| CHES1     | 1.2161 | 1.6408 | 1.0977 | 0.8262 | 1.1952 | 0.1695 |
| DTX2      | 1.1306 | 1.5700 | 1.1838 | 0.8973 | 1.1954 | 0.1395 |
| DIP2C     | 1.2612 | 1.5361 | 1.0599 | 0.9246 | 1.1955 | 0.1330 |
| JAK2      | 1.1789 | 1.4965 | 1.2365 | 0.8713 | 1.1958 | 0.1284 |
| BBS4      | 1.0253 | 1.7117 | 1.2312 | 0.8161 | 1.1961 | 0.1916 |
| KDM6B     | 1.1306 | 1.5301 | 1.3160 | 0.8076 | 1.1961 | 0.1531 |
| PFDN5     | 1.0638 | 1.5531 | 1.4255 | 0.7425 | 1.1962 | 0.1833 |
| SSH3      | 1.4589 | 1.3640 | 1.1634 | 0.8017 | 1.1970 | 0.1455 |
| FLJ90757  | 1.3007 | 1.4186 | 1.1363 | 0.9328 | 1.1971 | 0.1054 |
| ZDHHC16   | 1.0975 | 1.8163 | 1.1047 | 0.7705 | 1.1973 | 0.2206 |
| ALOX15    | 1.3024 | 1.5117 | 1.0970 | 0.8791 | 1.1975 | 0.1358 |
| DLG5      | 1.0940 | 1.5412 | 1.1534 | 1.0067 | 1.1988 | 0.1180 |
| CSNK1E    | 1.0287 | 1.7980 | 1.1391 | 0.8311 | 1.1992 | 0.2095 |
| RPS27L    | 1.1505 | 1.5744 | 1.2558 | 0.8169 | 1.1994 | 0.1561 |
| MAP2      | 1.1363 | 1.5096 | 1.2725 | 0.8800 | 1.1996 | 0.1315 |
| RAB9A     | 1.0722 | 1.7531 | 1.1556 | 0.8201 | 1.2002 | 0.1976 |
| LMTK3     | 1.2886 | 1.5383 | 1.1778 | 0.7986 | 1.2008 | 0.1538 |
| SC5DL     | 1.0269 | 1.8276 | 1.0617 | 0.8906 | 1.2017 | 0.2119 |
| C6orf52   | 1.0977 | 1.6090 | 1.2430 | 0.8581 | 1.2019 | 0.1572 |
| LOC728441 | 1.0734 | 1.4568 | 1.2841 | 0.9935 | 1.2020 | 0.1048 |
| C12orf5   | 1.1692 | 1.6844 | 1.1673 | 0.7872 | 1.2020 | 0.1842 |
| SLC25A42  | 1.2566 | 1.5114 | 1.1793 | 0.8625 | 1.2025 | 0.1337 |
| LOC645058 | 1.3075 | 1.6002 | 1.1392 | 0.7641 | 1.2028 | 0.1745 |
| SETDB2    | 1.1662 | 1.6461 | 1.1902 | 0.8095 | 1.2030 | 0.1714 |
| KIAA0430  | 1.2252 | 1.6547 | 1.0616 | 0.8715 | 1.2033 | 0.1669 |
| SYNE2     | 1.1699 | 1.4686 | 1.2792 | 0.8974 | 1.2038 | 0.1193 |
| PHACTR2   | 1.0580 | 1.6773 | 1.1956 | 0.8848 | 1.2039 | 0.1701 |
| YTHDF1    | 0.9711 | 2.0046 | 1.1222 | 0.7188 | 1.2042 | 0.2795 |
| VCX       | 1.2936 | 1.5534 | 1.1902 | 0.7822 | 1.2048 | 0.1603 |
| SELENBP1  | 1.0430 | 1.7904 | 1.1100 | 0.8791 | 1.2056 | 0.2009 |
| MYT1      | 1.0986 | 1.6609 | 1.1215 | 0.9415 | 1.2056 | 0.1569 |
| MSRB2     | 1.1245 | 1.6127 | 1.2919 | 0.7950 | 1.2060 | 0.1704 |
| PYCR2     | 1.1543 | 1.8486 | 1.0401 | 0.7815 | 1.2061 | 0.2279 |
| ANKRD52   | 1.3040 | 1.3020 | 1.1414 | 1.0780 | 1.2063 | 0.0573 |
| FBXL11    | 1.2016 | 1.6861 | 1.0520 | 0.8878 | 1.2069 | 0.1721 |
| LOC644511 | 0.9234 | 1.7817 | 1.2600 | 0.8628 | 1.2070 | 0.2106 |
| LGMN      | 1.0302 | 1.8718 | 1.1515 | 0.7771 | 1.2076 | 0.2347 |
| TAOK3     | 1.2791 | 1.4146 | 1.3210 | 0.8169 | 1.2079 | 0.1334 |
| FTHL16    | 1.0641 | 1.8147 | 1.1226 | 0.8321 | 1.2084 | 0.2116 |
| SPOP      | 1.1110 | 1.7849 | 1.1158 | 0.8222 | 1.2085 | 0.2040 |
| C22orf29  | 1.3659 | 1.5680 | 1.0262 | 0.8745 | 1.2087 | 0.1578 |
| GUSBL1    | 1.1056 | 1.8963 | 1.0874 | 0.7462 | 1.2089 | 0.2436 |
| COQ6      | 1.1451 | 1.7710 | 1.1942 | 0.7259 | 1.2090 | 0.2148 |
| GRAMD3    | 1.3779 | 1.4209 | 1.2197 | 0.8179 | 1.2091 | 0.1374 |

|            |        |        |        |        |        |        |
|------------|--------|--------|--------|--------|--------|--------|
| FAM71E1    | 1.2060 | 1.5886 | 1.1620 | 0.8827 | 1.2098 | 0.1451 |
| FAM188A    | 1.0672 | 1.4551 | 1.5882 | 0.7290 | 1.2099 | 0.1947 |
| KIAA0194   | 1.0866 | 1.7620 | 1.2356 | 0.7559 | 1.2100 | 0.2095 |
| TMEM158    | 0.9473 | 1.6939 | 1.3594 | 0.8406 | 1.2103 | 0.1962 |
| LOC1001307 | 0.9981 | 1.5073 | 1.6085 | 0.7279 | 1.2104 | 0.2091 |
| RBL2       | 1.2317 | 1.5195 | 1.1977 | 0.8935 | 1.2106 | 0.1280 |
| HIST1H4K   | 1.0965 | 1.8239 | 1.2630 | 0.6598 | 1.2108 | 0.2407 |
| ACTR1B     | 1.1252 | 1.7578 | 1.1807 | 0.7810 | 1.2112 | 0.2025 |
| SILV       | 1.2371 | 1.4447 | 1.3169 | 0.8461 | 1.2112 | 0.1290 |
| ENDOD1     | 1.4480 | 1.6188 | 1.0587 | 0.7208 | 1.2116 | 0.2012 |
| LOC728253  | 0.7886 | 2.1598 | 1.0955 | 0.8039 | 1.2120 | 0.3237 |
| SEZ6L2     | 1.2194 | 1.7760 | 1.0421 | 0.8104 | 1.2120 | 0.2058 |
| LEPROT     | 1.0608 | 1.4815 | 1.4392 | 0.8668 | 1.2121 | 0.1489 |
| PAIP2      | 1.0646 | 1.5444 | 1.4309 | 0.8100 | 1.2125 | 0.1688 |
| IDUA       | 1.2244 | 1.4331 | 1.3480 | 0.8447 | 1.2125 | 0.1299 |
| PVRL4      | 1.1325 | 1.3904 | 1.3308 | 0.9972 | 1.2127 | 0.0905 |
| PCDHB4     | 1.2384 | 1.3287 | 1.2879 | 0.9987 | 1.2134 | 0.0739 |
| TRAPPC6A   | 1.1377 | 1.6206 | 1.1358 | 0.9602 | 1.2136 | 0.1419 |
| GAA        | 1.3421 | 1.5042 | 1.1133 | 0.8950 | 1.2136 | 0.1331 |
| CD163L1    | 1.2827 | 1.3966 | 1.3370 | 0.8382 | 1.2136 | 0.1273 |
| LOC153561  | 1.1700 | 1.7345 | 1.1181 | 0.8328 | 1.2139 | 0.1887 |
| LOC440585  | 1.1791 | 1.5993 | 1.2405 | 0.8365 | 1.2139 | 0.1562 |
| EIF4A2     | 1.1634 | 1.5553 | 1.2517 | 0.8872 | 1.2144 | 0.1376 |
| ZNFX1      | 1.1769 | 1.6792 | 1.1164 | 0.8875 | 1.2150 | 0.1668 |
| PARM1      | 1.3947 | 1.3913 | 1.1171 | 0.9586 | 1.2154 | 0.1075 |
| LAMB2      | 1.1997 | 1.6472 | 1.1646 | 0.8507 | 1.2155 | 0.1639 |
| FAM46C     | 1.2368 | 1.5987 | 1.1872 | 0.8428 | 1.2164 | 0.1547 |
| RABGAP1    | 1.0418 | 2.0088 | 1.0527 | 0.7638 | 1.2168 | 0.2723 |
| PLCB4      | 1.2422 | 1.3889 | 1.2971 | 0.9394 | 1.2169 | 0.0973 |
| KIF13B     | 1.2878 | 1.6693 | 1.2099 | 0.7018 | 1.2172 | 0.1990 |
| KLRAQ1     | 1.3409 | 1.5981 | 1.1592 | 0.7707 | 1.2172 | 0.1739 |
| TSC22D1    | 1.2617 | 1.5936 | 1.2959 | 0.7195 | 1.2177 | 0.1820 |
| CARKD      | 1.0382 | 1.9840 | 1.0833 | 0.7654 | 1.2177 | 0.2649 |
| XPC        | 1.2962 | 1.5021 | 1.1530 | 0.9208 | 1.2180 | 0.1223 |
| CD99L2     | 1.1242 | 1.6333 | 1.2957 | 0.8190 | 1.2180 | 0.1699 |
| C1orf115   | 1.2836 | 1.5162 | 1.1954 | 0.8772 | 1.2181 | 0.1322 |
| FXR2       | 1.1383 | 1.8434 | 1.0015 | 0.8903 | 1.2184 | 0.2144 |
| PALMD      | 1.0111 | 1.5935 | 1.3739 | 0.8956 | 1.2185 | 0.1613 |
| CSAG2      | 1.1904 | 1.5437 | 1.3565 | 0.7838 | 1.2186 | 0.1619 |
| LOC648927  | 1.1708 | 1.6256 | 1.2269 | 0.8532 | 1.2191 | 0.1585 |
| ASCC2      | 1.1710 | 1.6972 | 1.1836 | 0.8250 | 1.2192 | 0.1797 |
| ZDHHC3     | 0.9957 | 1.7771 | 1.2914 | 0.8137 | 1.2195 | 0.2103 |
| GSK3B      | 0.9148 | 1.9241 | 1.2413 | 0.8012 | 1.2204 | 0.2524 |
| LOC644869  | 1.2119 | 1.6877 | 1.0986 | 0.8835 | 1.2204 | 0.1700 |
| ZBTB4      | 1.2169 | 1.5531 | 1.3109 | 0.8021 | 1.2207 | 0.1565 |
| TOR1AIP1   | 1.1817 | 1.5381 | 1.3290 | 0.8344 | 1.2208 | 0.1481 |

|            |        |        |        |        |        |        |
|------------|--------|--------|--------|--------|--------|--------|
| LOC649859  | 1.2611 | 1.3061 | 1.3193 | 0.9971 | 1.2209 | 0.0756 |
| SCGB2A1    | 1.1802 | 1.4150 | 1.4635 | 0.8259 | 1.2212 | 0.1455 |
| RETSAT     | 0.9641 | 1.6389 | 1.3403 | 0.9416 | 1.2212 | 0.1666 |
| CRELD1     | 1.1872 | 1.6314 | 1.1768 | 0.8898 | 1.2213 | 0.1531 |
| NSF        | 1.1898 | 1.7007 | 1.2638 | 0.7335 | 1.2219 | 0.1980 |
| CTNNA1     | 1.2027 | 1.6751 | 1.1891 | 0.8210 | 1.2220 | 0.1750 |
| CD47       | 1.2556 | 1.4853 | 1.3046 | 0.8431 | 1.2221 | 0.1356 |
| AHNAK      | 1.3384 | 1.5623 | 1.0927 | 0.8953 | 1.2221 | 0.1451 |
| ATPAF1     | 1.0705 | 1.8273 | 1.2446 | 0.7465 | 1.2222 | 0.2266 |
| RLN1       | 1.1758 | 1.3828 | 1.4622 | 0.8681 | 1.2222 | 0.1326 |
| ILK        | 1.0568 | 1.8531 | 1.1155 | 0.8673 | 1.2232 | 0.2165 |
| FAT1       | 1.3603 | 1.6692 | 1.0149 | 0.8490 | 1.2234 | 0.1828 |
| APH1B      | 1.0941 | 1.7595 | 1.1653 | 0.8754 | 1.2236 | 0.1890 |
| SNRPN      | 1.0268 | 1.7786 | 1.2848 | 0.8044 | 1.2237 | 0.2094 |
| FLJ42627   | 1.3425 | 1.5816 | 0.9554 | 1.0153 | 1.2237 | 0.1465 |
| TRQ1       | 1.1277 | 1.4421 | 1.5013 | 0.8237 | 1.2237 | 0.1565 |
| ZNF350     | 1.3839 | 1.4614 | 1.0836 | 0.9678 | 1.2242 | 0.1181 |
| SH3GLB1    | 1.0408 | 1.8511 | 1.2398 | 0.7660 | 1.2244 | 0.2304 |
| ATP6V0D1   | 1.0311 | 1.9784 | 1.0991 | 0.7905 | 1.2248 | 0.2598 |
| CD99       | 1.2255 | 1.5365 | 1.2921 | 0.8456 | 1.2249 | 0.1430 |
| CCBL1      | 1.2930 | 1.6598 | 1.1623 | 0.7853 | 1.2251 | 0.1805 |
| CLN5       | 1.0490 | 1.7642 | 1.2174 | 0.8716 | 1.2256 | 0.1929 |
| C9orf103   | 1.1401 | 1.6763 | 1.3057 | 0.7809 | 1.2258 | 0.1859 |
| PRR16      | 1.1842 | 1.3252 | 1.2938 | 1.1012 | 1.2261 | 0.0514 |
| LOC1001313 | 1.6219 | 1.2330 | 1.1878 | 0.8631 | 1.2265 | 0.1555 |
| P2RY5      | 1.1599 | 1.6765 | 1.2509 | 0.8190 | 1.2266 | 0.1764 |
| HIST1H2BE  | 1.1065 | 1.6223 | 1.3741 | 0.8090 | 1.2280 | 0.1749 |
| TRAF3IP2   | 1.1480 | 1.5748 | 1.1869 | 1.0038 | 1.2284 | 0.1220 |
| STYXL1     | 1.1731 | 1.6686 | 1.2694 | 0.8030 | 1.2285 | 0.1778 |
| PAK4       | 1.0185 | 1.8847 | 1.1512 | 0.8607 | 1.2288 | 0.2266 |
| SSPO       | 1.2330 | 1.5205 | 1.1902 | 0.9735 | 1.2293 | 0.1125 |
| MIR1978    | 0.9364 | 1.7061 | 1.4733 | 0.8018 | 1.2294 | 0.2151 |
| SERPINI1   | 1.2043 | 1.5658 | 1.2092 | 0.9387 | 1.2295 | 0.1287 |
| TAGLN      | 1.2171 | 1.4324 | 1.2665 | 1.0022 | 1.2295 | 0.0887 |
| RNF24      | 1.3342 | 1.6774 | 1.2475 | 0.6624 | 1.2304 | 0.2109 |
| PLA2G4F    | 1.1008 | 1.6769 | 1.3242 | 0.8201 | 1.2305 | 0.1810 |
| KIAA1539   | 1.3353 | 1.5357 | 1.2425 | 0.8088 | 1.2306 | 0.1533 |
| ADRA2A     | 1.6213 | 1.2078 | 1.2309 | 0.8642 | 1.2311 | 0.1548 |
| TMEM184C   | 1.1528 | 1.4902 | 1.5680 | 0.7134 | 1.2311 | 0.1947 |
| LOC730996  | 0.7569 | 1.6597 | 1.8660 | 0.6459 | 1.2321 | 0.3101 |
| AQP11      | 1.1900 | 1.4937 | 1.4505 | 0.7951 | 1.2323 | 0.1604 |
| LPHN2      | 1.3957 | 1.3506 | 1.0776 | 1.1066 | 1.2326 | 0.0819 |
| TXNIP      | 1.0779 | 1.8624 | 1.2665 | 0.7254 | 1.2330 | 0.2379 |
| FAM111A    | 1.1602 | 1.7267 | 1.3386 | 0.7108 | 1.2341 | 0.2107 |
| ZFHX4      | 1.1862 | 1.4092 | 1.3666 | 0.9758 | 1.2345 | 0.0988 |
| LOC388692  | 1.2111 | 1.6734 | 1.0966 | 0.9583 | 1.2349 | 0.1550 |

|           |        |        |        |        |        |        |
|-----------|--------|--------|--------|--------|--------|--------|
| DDC       | 1.0484 | 1.8393 | 1.2112 | 0.8413 | 1.2351 | 0.2152 |
| SGSH      | 1.2392 | 1.5931 | 1.2022 | 0.9071 | 1.2354 | 0.1405 |
| CNDP2     | 1.0139 | 1.8362 | 1.2878 | 0.8038 | 1.2354 | 0.2234 |
| DCAKD     | 1.2073 | 1.6468 | 1.1998 | 0.8884 | 1.2356 | 0.1559 |
| TRIM68    | 1.2958 | 1.6228 | 1.1685 | 0.8577 | 1.2362 | 0.1583 |
| C3orf59   | 1.1343 | 1.6033 | 1.2860 | 0.9218 | 1.2364 | 0.1433 |
| ANXA9     | 1.1128 | 1.6139 | 1.4138 | 0.8057 | 1.2366 | 0.1767 |
| HPN       | 1.4656 | 1.5635 | 1.0965 | 0.8209 | 1.2366 | 0.1712 |
| MGC16169  | 1.1186 | 1.6736 | 1.2952 | 0.8591 | 1.2366 | 0.1710 |
| COLEC12   | 1.0362 | 1.4610 | 1.5135 | 0.9378 | 1.2371 | 0.1462 |
| LAMA5     | 1.1844 | 1.7474 | 1.1351 | 0.8854 | 1.2381 | 0.1819 |
| ETFA      | 0.9886 | 1.8587 | 1.2856 | 0.8206 | 1.2384 | 0.2280 |
| LOC652900 | 1.3031 | 1.7398 | 1.1461 | 0.7649 | 1.2385 | 0.2017 |
| MYL5      | 1.0732 | 1.7461 | 1.2463 | 0.8887 | 1.2386 | 0.1842 |
| SKAP2     | 1.0931 | 1.8856 | 1.1656 | 0.8113 | 1.2389 | 0.2287 |
| PRKAR1A   | 1.0598 | 1.8928 | 1.1897 | 0.8170 | 1.2398 | 0.2309 |
| BICD2     | 1.2546 | 1.6665 | 1.2147 | 0.8245 | 1.2401 | 0.1721 |
| MRPL33    | 1.2093 | 1.6952 | 1.2397 | 0.8184 | 1.2406 | 0.1793 |
| FLJ22222  | 1.1964 | 1.7598 | 1.1446 | 0.8655 | 1.2416 | 0.1874 |
| MFGE8     | 1.3207 | 1.7395 | 1.0533 | 0.8549 | 1.2421 | 0.1913 |
| TMEM41B   | 1.3073 | 1.6697 | 1.2039 | 0.7877 | 1.2421 | 0.1814 |
| FAM174B   | 1.1215 | 1.7996 | 1.2281 | 0.8197 | 1.2422 | 0.2049 |
| PLEKHH3   | 1.3696 | 1.7403 | 1.0530 | 0.8071 | 1.2425 | 0.2020 |
| SIPA1L2   | 1.1401 | 1.6247 | 1.3203 | 0.8852 | 1.2426 | 0.1555 |
| JAG1      | 1.0864 | 1.9488 | 1.0548 | 0.8858 | 1.2440 | 0.2390 |
| POLR3GL   | 1.0868 | 1.9077 | 1.1543 | 0.8280 | 1.2442 | 0.2321 |
| ZBTB42    | 1.0515 | 2.2400 | 1.0089 | 0.6783 | 1.2447 | 0.3421 |
| STK40     | 1.1263 | 1.8391 | 1.2228 | 0.7904 | 1.2447 | 0.2188 |
| SGSM2     | 1.2346 | 1.8897 | 1.0887 | 0.7659 | 1.2447 | 0.2363 |
| LOC339290 | 1.1879 | 1.5632 | 1.3707 | 0.8604 | 1.2455 | 0.1495 |
| SLC9A2    | 1.2485 | 1.6578 | 1.2642 | 0.8121 | 1.2456 | 0.1728 |
| ACADM     | 1.1104 | 1.7111 | 1.4000 | 0.7613 | 1.2457 | 0.2028 |
| C14orf135 | 1.3379 | 1.7079 | 1.1799 | 0.7606 | 1.2466 | 0.1962 |
| TM4SF1    | 1.2684 | 1.4699 | 1.3882 | 0.8602 | 1.2467 | 0.1353 |
| SUMF1     | 1.1437 | 1.8021 | 1.2445 | 0.7977 | 1.2470 | 0.2083 |
| GDF15     | 1.3535 | 1.8028 | 1.0312 | 0.8024 | 1.2475 | 0.2169 |
| AK3       | 1.1225 | 1.7482 | 1.3634 | 0.7585 | 1.2481 | 0.2079 |
| SLC9A3R1  | 1.2504 | 1.6987 | 1.2072 | 0.8371 | 1.2483 | 0.1765 |
| TNKS1BP1  | 1.3243 | 1.5879 | 1.2334 | 0.8484 | 1.2485 | 0.1531 |
| LPP       | 1.0177 | 2.0334 | 1.0429 | 0.9006 | 1.2486 | 0.2634 |
| KIAA1522  | 1.4563 | 1.7482 | 1.1314 | 0.6591 | 1.2487 | 0.2334 |
| RNF150    | 1.4428 | 1.4304 | 1.2321 | 0.8898 | 1.2488 | 0.1290 |
| KIAA0513  | 1.3636 | 1.5706 | 1.1296 | 0.9322 | 1.2490 | 0.1388 |
| GNAQ      | 1.1641 | 1.5070 | 1.3658 | 0.9631 | 1.2500 | 0.1187 |
| IRF6      | 1.0616 | 1.8288 | 1.4287 | 0.6846 | 1.2509 | 0.2453 |
| FKBP5     | 1.5882 | 1.7423 | 1.0423 | 0.6310 | 1.2509 | 0.2554 |

|           |        |        |        |        |        |        |
|-----------|--------|--------|--------|--------|--------|--------|
| CCDC53    | 1.2171 | 1.6113 | 1.2898 | 0.8863 | 1.2511 | 0.1487 |
| CMIP      | 1.2309 | 1.6904 | 1.1066 | 0.9767 | 1.2512 | 0.1553 |
| TFAP2C    | 1.2795 | 1.6114 | 1.2620 | 0.8544 | 1.2518 | 0.1549 |
| DYNC1H1   | 1.1503 | 1.7095 | 1.2443 | 0.9095 | 1.2534 | 0.1676 |
| C22orf32  | 1.1475 | 1.6852 | 1.2628 | 0.9192 | 1.2537 | 0.1606 |
| PHKB      | 1.1353 | 1.7583 | 1.2589 | 0.8626 | 1.2538 | 0.1874 |
| CHSY1     | 1.3165 | 1.5335 | 1.3920 | 0.7752 | 1.2543 | 0.1659 |
| LRRFIP2   | 1.3535 | 1.7913 | 1.0630 | 0.8116 | 1.2549 | 0.2103 |
| HABP4     | 1.3529 | 1.5194 | 1.2412 | 0.9073 | 1.2552 | 0.1293 |
| DYNLRB2   | 1.3727 | 1.4975 | 1.1962 | 0.9562 | 1.2556 | 0.1174 |
| TMEM141   | 1.0630 | 1.7533 | 1.3442 | 0.8629 | 1.2558 | 0.1930 |
| SCNN1A    | 1.2486 | 1.8837 | 1.1060 | 0.7854 | 1.2559 | 0.2306 |
| GBF1      | 1.3961 | 1.6452 | 1.1051 | 0.8779 | 1.2561 | 0.1675 |
| PARVA     | 1.2651 | 1.5867 | 1.3722 | 0.8019 | 1.2565 | 0.1656 |
| PEBP4     | 1.3839 | 1.4543 | 1.2868 | 0.9062 | 1.2578 | 0.1221 |
| NEDD4L    | 1.0448 | 1.9148 | 1.2141 | 0.8575 | 1.2578 | 0.2308 |
| KLF9      | 1.2747 | 1.6926 | 1.2122 | 0.8528 | 1.2581 | 0.1721 |
| EPHX1     | 1.0034 | 1.9952 | 1.2682 | 0.7659 | 1.2582 | 0.2662 |
| CPEB3     | 1.3208 | 1.7074 | 1.0505 | 0.9563 | 1.2588 | 0.1683 |
| GLYATL1   | 1.2306 | 1.2849 | 1.5854 | 0.9350 | 1.2590 | 0.1332 |
| C2CD2L    | 1.3870 | 1.5351 | 1.2622 | 0.8540 | 1.2596 | 0.1462 |
| HACL1     | 1.0013 | 1.7339 | 1.4188 | 0.8842 | 1.2596 | 0.1953 |
| TBX15     | 1.2889 | 1.4187 | 1.3539 | 0.9771 | 1.2597 | 0.0979 |
| C10orf118 | 1.2642 | 1.5606 | 1.2865 | 0.9281 | 1.2598 | 0.1295 |
| STARD10   | 1.0509 | 1.8950 | 1.0585 | 1.0355 | 1.2600 | 0.2117 |
| RGL1      | 1.2567 | 1.8735 | 1.1684 | 0.7414 | 1.2600 | 0.2334 |
| GDI1      | 1.3548 | 1.6891 | 1.2450 | 0.7578 | 1.2617 | 0.1927 |
| USP34     | 1.0459 | 1.9675 | 1.1820 | 0.8550 | 1.2626 | 0.2444 |
| AES       | 1.2115 | 1.7769 | 1.2081 | 0.8545 | 1.2628 | 0.1907 |
| ATP9A     | 1.2935 | 1.6878 | 1.2039 | 0.8667 | 1.2630 | 0.1688 |
| LOC400446 | 1.2626 | 1.7315 | 1.2522 | 0.8064 | 1.2632 | 0.1889 |
| ACSS2     | 1.2018 | 1.7689 | 1.2448 | 0.8379 | 1.2634 | 0.1917 |
| BAPX1     | 1.4635 | 1.5073 | 1.1759 | 0.9110 | 1.2645 | 0.1389 |
| SHROOM2   | 1.1123 | 1.8347 | 1.1602 | 0.9511 | 1.2646 | 0.1952 |
| ZNF702P   | 1.4892 | 1.5076 | 1.0293 | 1.0322 | 1.2646 | 0.1350 |
| GNG10     | 1.1674 | 1.7268 | 1.3263 | 0.8382 | 1.2647 | 0.1845 |
| RALYL     | 1.0993 | 1.6212 | 1.5263 | 0.8122 | 1.2648 | 0.1888 |
| SCPEP1    | 1.3172 | 1.8186 | 1.2118 | 0.7147 | 1.2656 | 0.2264 |
| PLXDC2    | 1.1103 | 1.3979 | 1.7735 | 0.7819 | 1.2659 | 0.2109 |
| ENC1      | 1.2896 | 1.6580 | 1.3427 | 0.7738 | 1.2660 | 0.1831 |
| OSBPL2    | 1.2521 | 1.6911 | 1.2721 | 0.8489 | 1.2661 | 0.1720 |
| DHRS7     | 1.2993 | 1.6818 | 1.3302 | 0.7533 | 1.2662 | 0.1917 |
| STX3      | 1.1844 | 1.8570 | 1.2675 | 0.7559 | 1.2662 | 0.2266 |
| C1orf128  | 1.0978 | 1.9727 | 1.3095 | 0.6853 | 1.2663 | 0.2688 |
| SNURF     | 1.0688 | 1.7292 | 1.3859 | 0.8836 | 1.2669 | 0.1858 |
| TMEM50B   | 1.2376 | 1.6731 | 1.3799 | 0.7789 | 1.2673 | 0.1864 |

|            |        |        |        |        |        |        |
|------------|--------|--------|--------|--------|--------|--------|
| CHKB       | 1.1662 | 1.6599 | 1.3847 | 0.8593 | 1.2676 | 0.1695 |
| GLYATL2    | 1.1568 | 1.6279 | 1.3865 | 0.8996 | 1.2677 | 0.1559 |
| APPL2      | 1.3100 | 1.9720 | 1.0613 | 0.7281 | 1.2678 | 0.2632 |
| MACROD1    | 1.0644 | 1.8278 | 1.3927 | 0.7864 | 1.2678 | 0.2240 |
| VCX3A      | 1.3589 | 1.6618 | 1.2259 | 0.8248 | 1.2679 | 0.1736 |
| CDKN2C     | 1.1208 | 1.4365 | 1.3863 | 1.1283 | 1.2680 | 0.0835 |
| POMGNT1    | 1.3723 | 1.6379 | 1.3332 | 0.7315 | 1.2687 | 0.1914 |
| JUN        | 1.0942 | 1.7633 | 1.3486 | 0.8710 | 1.2693 | 0.1914 |
| ALDH2      | 1.3427 | 1.5233 | 1.4430 | 0.7731 | 1.2705 | 0.1699 |
| TTYH1      | 1.2096 | 1.5536 | 1.3707 | 0.9505 | 1.2711 | 0.1279 |
| PIP5K1C    | 1.4153 | 1.5683 | 1.2063 | 0.8966 | 1.2716 | 0.1454 |
| C15orf57   | 1.2576 | 1.6887 | 1.2352 | 0.9053 | 1.2717 | 0.1606 |
| SEPW1      | 1.0985 | 1.6481 | 1.4769 | 0.8637 | 1.2718 | 0.1780 |
| DUSP1      | 1.2506 | 1.8447 | 1.1584 | 0.8335 | 1.2718 | 0.2109 |
| C1orf218   | 1.0486 | 1.9001 | 1.3787 | 0.7614 | 1.2722 | 0.2444 |
| NGRN       | 1.1192 | 1.8256 | 1.3343 | 0.8130 | 1.2730 | 0.2130 |
| ACAD8      | 1.2829 | 1.8063 | 1.2497 | 0.7581 | 1.2743 | 0.2141 |
| KLF6       | 1.2695 | 1.7341 | 1.2503 | 0.8436 | 1.2744 | 0.1820 |
| GNG7       | 1.4694 | 1.6085 | 1.0637 | 0.9570 | 1.2747 | 0.1567 |
| CYP11A1    | 1.2248 | 1.6019 | 1.3947 | 0.8830 | 1.2761 | 0.1520 |
| LOC1001327 | 1.2403 | 1.6134 | 1.0806 | 1.1710 | 1.2763 | 0.1170 |
| PINK1      | 1.2456 | 1.8109 | 1.2675 | 0.7819 | 1.2764 | 0.2104 |
| TM2D2      | 1.1203 | 1.5102 | 1.5792 | 0.8969 | 1.2767 | 0.1619 |
| LOC646723  | 1.4547 | 1.6479 | 1.2976 | 0.7072 | 1.2769 | 0.2030 |
| AXUD1      | 1.1558 | 1.8970 | 1.1663 | 0.8887 | 1.2769 | 0.2165 |
| CYB5R3     | 1.2110 | 1.8459 | 1.2229 | 0.8289 | 1.2772 | 0.2105 |
| GRHL2      | 1.4495 | 1.6220 | 1.1221 | 0.9210 | 1.2786 | 0.1580 |
| FLJ40504   | 1.4746 | 1.6503 | 1.3174 | 0.6733 | 1.2789 | 0.2130 |
| LOC113386  | 1.2247 | 1.8005 | 1.3372 | 0.7532 | 1.2789 | 0.2150 |
| ATMIN      | 1.1868 | 1.7502 | 1.2617 | 0.9188 | 1.2794 | 0.1733 |
| TBC1D20    | 1.3014 | 1.7334 | 1.2226 | 0.8659 | 1.2808 | 0.1781 |
| LOC642362  | 1.6232 | 1.4152 | 1.1824 | 0.9028 | 1.2809 | 0.1549 |
| RRAGB      | 1.1568 | 1.7873 | 1.2748 | 0.9061 | 1.2813 | 0.1854 |
| IFNGR1     | 1.0614 | 1.8941 | 1.4337 | 0.7377 | 1.2817 | 0.2488 |
| EIF3F      | 1.0878 | 1.9642 | 1.3258 | 0.7506 | 1.2821 | 0.2562 |
| LOC440359  | 0.9640 | 2.0787 | 1.3215 | 0.7690 | 1.2833 | 0.2888 |
| CYB5R1     | 1.2504 | 1.7186 | 1.4196 | 0.7484 | 1.2843 | 0.2031 |
| ZNF25      | 1.3007 | 1.7090 | 1.2209 | 0.9066 | 1.2843 | 0.1652 |
| CUTL1      | 1.2023 | 1.7344 | 1.3113 | 0.8906 | 1.2847 | 0.1744 |
| BCL2L13    | 1.2063 | 1.9674 | 1.1846 | 0.7823 | 1.2851 | 0.2474 |
| REXO2      | 0.9277 | 1.9784 | 1.4623 | 0.7734 | 1.2855 | 0.2741 |
| BAT2L      | 1.2927 | 1.7895 | 1.1349 | 0.9280 | 1.2863 | 0.1836 |
| MRFAP1     | 1.3929 | 1.6922 | 1.2337 | 0.8265 | 1.2863 | 0.1803 |
| YPEL1      | 1.4172 | 1.5597 | 1.2495 | 0.9201 | 1.2866 | 0.1376 |
| SEMA6A     | 1.1883 | 1.9051 | 1.2322 | 0.8212 | 1.2867 | 0.2258 |
| STAT3      | 1.2710 | 2.0102 | 1.1427 | 0.7237 | 1.2869 | 0.2679 |

|            |        |        |        |        |        |        |
|------------|--------|--------|--------|--------|--------|--------|
| ADD1       | 1.3958 | 1.9263 | 1.1147 | 0.7110 | 1.2869 | 0.2553 |
| ACACA      | 1.2330 | 1.8808 | 1.2786 | 0.7592 | 1.2879 | 0.2299 |
| MBOAT7     | 1.2992 | 1.7936 | 1.1683 | 0.8914 | 1.2881 | 0.1887 |
| ZNF616     | 1.3188 | 1.6386 | 1.2641 | 0.9335 | 1.2887 | 0.1444 |
| LOC644844  | 1.2326 | 1.6408 | 1.3850 | 0.8971 | 1.2889 | 0.1554 |
| FLJ10916   | 1.3819 | 1.7741 | 1.1816 | 0.8202 | 1.2895 | 0.1990 |
| UNC84B     | 1.2218 | 1.9353 | 1.2598 | 0.7446 | 1.2904 | 0.2448 |
| TMBIM1     | 1.3458 | 1.8067 | 1.1473 | 0.8622 | 1.2905 | 0.1986 |
| ALDH3B2    | 1.1822 | 1.7219 | 1.3737 | 0.8842 | 1.2905 | 0.1755 |
| SELM       | 1.1708 | 1.6595 | 1.5363 | 0.7982 | 1.2912 | 0.1944 |
| JARID2     | 1.1479 | 1.8838 | 1.2619 | 0.8726 | 1.2915 | 0.2137 |
| PIK3R3     | 1.0828 | 1.7723 | 1.4158 | 0.8965 | 1.2918 | 0.1928 |
| ITGA1      | 1.1278 | 1.5426 | 1.6167 | 0.8819 | 1.2922 | 0.1740 |
| EFNA1      | 1.2650 | 1.8014 | 1.2846 | 0.8192 | 1.2925 | 0.2008 |
| LOC728565  | 1.1223 | 1.9358 | 1.3301 | 0.7823 | 1.2926 | 0.2423 |
| PEX19      | 1.2863 | 1.8438 | 1.3698 | 0.6720 | 1.2930 | 0.2407 |
| HIST2H2AA4 | 1.1392 | 1.7244 | 1.4702 | 0.8387 | 1.2931 | 0.1931 |
| PNRC2      | 1.2647 | 1.8487 | 1.3308 | 0.7284 | 1.2932 | 0.2291 |
| TFPT       | 1.4598 | 1.4943 | 1.2480 | 0.9712 | 1.2933 | 0.1204 |
| SUMF2      | 1.0885 | 1.7215 | 1.5113 | 0.8524 | 1.2934 | 0.1973 |
| UBE2E2     | 1.1915 | 1.8565 | 1.2997 | 0.8264 | 1.2935 | 0.2132 |
| COL9A2     | 1.2422 | 1.5115 | 1.4330 | 0.9896 | 1.2941 | 0.1162 |
| ELF3       | 1.0706 | 1.6254 | 1.5660 | 0.9151 | 1.2943 | 0.1773 |
| TRAFD1     | 1.4985 | 1.5020 | 1.2690 | 0.9130 | 1.2956 | 0.1387 |
| PTPRF      | 1.2173 | 1.9274 | 1.2225 | 0.8216 | 1.2972 | 0.2301 |
| MEX3D      | 1.7538 | 1.6545 | 0.9995 | 0.7827 | 1.2976 | 0.2397 |
| BCYRN1     | 1.0344 | 1.5278 | 1.7993 | 0.8297 | 1.2978 | 0.2223 |
| ZNF671     | 1.3084 | 1.6548 | 1.2978 | 0.9351 | 1.2990 | 0.1470 |
| NFE2L1     | 1.3410 | 1.9102 | 1.0943 | 0.8519 | 1.2993 | 0.2268 |
| MRFAP1L1   | 1.1042 | 2.0871 | 1.1732 | 0.8354 | 1.3000 | 0.2723 |
| ZMYND12    | 1.2250 | 1.8271 | 1.3076 | 0.8409 | 1.3001 | 0.2030 |
| MYH9       | 1.2529 | 1.9377 | 1.1388 | 0.8748 | 1.3011 | 0.2265 |
| OSBPL5     | 1.4194 | 1.7590 | 1.1468 | 0.8792 | 1.3011 | 0.1883 |
| CTSF       | 1.2871 | 1.4804 | 1.4956 | 0.9433 | 1.3016 | 0.1285 |
| TRIM26     | 1.1686 | 1.9624 | 1.2072 | 0.8690 | 1.3018 | 0.2328 |
| ZNF248     | 1.4145 | 1.6544 | 1.2248 | 0.9142 | 1.3020 | 0.1563 |
| HLA-B      | 1.2660 | 1.9215 | 1.1249 | 0.8964 | 1.3022 | 0.2200 |
| HIST1H2AC  | 1.1461 | 1.9112 | 1.3705 | 0.7834 | 1.3028 | 0.2361 |
| RARRES3    | 1.0195 | 2.0923 | 1.3303 | 0.7703 | 1.3031 | 0.2869 |
| LOC652773  | 1.0349 | 2.0067 | 1.4395 | 0.7381 | 1.3048 | 0.2746 |
| HIBADH     | 1.2031 | 1.7976 | 1.3686 | 0.8508 | 1.3050 | 0.1965 |
| C9orf152   | 1.5009 | 1.6492 | 1.1986 | 0.8721 | 1.3052 | 0.1721 |
| GDE1       | 1.2941 | 1.5768 | 1.4259 | 0.9288 | 1.3064 | 0.1385 |
| ULK1       | 1.4952 | 1.8648 | 1.0903 | 0.7795 | 1.3074 | 0.2366 |
| NRP1       | 1.3598 | 1.8370 | 1.1744 | 0.8594 | 1.3076 | 0.2044 |
| PCMTD1     | 1.4546 | 1.7279 | 1.1605 | 0.8878 | 1.3077 | 0.1817 |

|            |        |        |        |        |        |        |
|------------|--------|--------|--------|--------|--------|--------|
| SLC2A3     | 1.6229 | 1.4122 | 1.1792 | 1.0177 | 1.3080 | 0.1326 |
| TSPAN7     | 1.1719 | 1.8171 | 1.3866 | 0.8636 | 1.3098 | 0.2003 |
| MRLC2      | 1.1052 | 1.9571 | 1.3299 | 0.8472 | 1.3099 | 0.2372 |
| DNAJB2     | 1.4786 | 1.6904 | 1.2983 | 0.7737 | 1.3102 | 0.1960 |
| SERINC1    | 1.2759 | 1.5765 | 1.5756 | 0.8147 | 1.3107 | 0.1798 |
| RAB25      | 1.2097 | 1.8623 | 1.3255 | 0.8483 | 1.3114 | 0.2099 |
| H2AFJ      | 1.2438 | 1.9963 | 1.2308 | 0.7767 | 1.3119 | 0.2527 |
| KRT18P13   | 1.4560 | 1.6463 | 1.3695 | 0.7833 | 1.3138 | 0.1860 |
| FDFT1      | 1.1942 | 1.7865 | 1.4704 | 0.8051 | 1.3141 | 0.2084 |
| RIT1       | 1.2534 | 1.8196 | 1.2845 | 0.8994 | 1.3142 | 0.1898 |
| CBWD3      | 1.1835 | 2.0979 | 1.1503 | 0.8258 | 1.3144 | 0.2734 |
| PCDH20     | 1.6564 | 1.4213 | 1.3164 | 0.8656 | 1.3149 | 0.1658 |
| CDK8       | 1.2323 | 1.8892 | 1.3908 | 0.7498 | 1.3155 | 0.2348 |
| MESP1      | 1.2612 | 1.8340 | 1.3966 | 0.7794 | 1.3178 | 0.2171 |
| C21orf34   | 1.2925 | 1.7697 | 1.4164 | 0.7951 | 1.3184 | 0.2016 |
| SLC33A1    | 1.5479 | 1.6759 | 1.3417 | 0.7084 | 1.3185 | 0.2147 |
| LOC1001280 | 1.1715 | 1.8356 | 1.4404 | 0.8299 | 1.3193 | 0.2126 |
| ATP1A1     | 1.2939 | 1.7834 | 1.3262 | 0.8791 | 1.3206 | 0.1848 |
| GLUD1      | 1.4188 | 1.9219 | 1.2257 | 0.7168 | 1.3208 | 0.2491 |
| C4orf34    | 1.3221 | 1.8842 | 1.3060 | 0.7810 | 1.3233 | 0.2253 |
| KIAA1683   | 1.3836 | 1.7383 | 1.1573 | 1.0148 | 1.3235 | 0.1577 |
| C9orf100S  | 1.2124 | 1.9822 | 1.2224 | 0.8778 | 1.3237 | 0.2337 |
| TADA2B     | 1.4141 | 1.7173 | 1.2561 | 0.9084 | 1.3240 | 0.1684 |
| BSDC1      | 1.3359 | 1.9471 | 1.2649 | 0.7514 | 1.3248 | 0.2449 |
| FRAT2      | 1.2021 | 2.0710 | 1.2275 | 0.8008 | 1.3254 | 0.2671 |
| C5orf5     | 1.3218 | 1.8126 | 1.3774 | 0.7913 | 1.3258 | 0.2092 |
| USMG5      | 1.0904 | 1.9698 | 1.4069 | 0.8370 | 1.3260 | 0.2442 |
| RBKS       | 1.3605 | 1.7908 | 1.2814 | 0.8718 | 1.3261 | 0.1883 |
| SPTAN1     | 1.4282 | 1.7349 | 1.1339 | 1.0077 | 1.3262 | 0.1623 |
| LMBRD1     | 1.1008 | 2.0566 | 1.2943 | 0.8553 | 1.3267 | 0.2593 |
| ADH1C      | 1.0410 | 1.7244 | 1.6405 | 0.9029 | 1.3272 | 0.2077 |
| RCAN2      | 1.3278 | 1.5086 | 1.4956 | 0.9769 | 1.3272 | 0.1238 |
| DDX24      | 1.1673 | 2.0655 | 1.2875 | 0.7925 | 1.3282 | 0.2674 |
| TP53INP1   | 1.2083 | 1.8817 | 1.3871 | 0.8418 | 1.3297 | 0.2162 |
| ALDH4A1    | 1.4540 | 1.5893 | 1.4019 | 0.8747 | 1.3300 | 0.1568 |
| FLOT2      | 1.2828 | 1.8331 | 1.2814 | 0.9227 | 1.3300 | 0.1879 |
| SNHG5      | 1.3083 | 1.8613 | 1.2806 | 0.8709 | 1.3303 | 0.2033 |
| OGFR       | 1.4048 | 1.6285 | 1.2977 | 0.9908 | 1.3305 | 0.1325 |
| UBE3A      | 1.1104 | 1.9672 | 1.3416 | 0.9063 | 1.3313 | 0.2298 |
| SETBP1     | 1.2066 | 1.9618 | 1.2508 | 0.9075 | 1.3316 | 0.2235 |
| TRK1       | 1.3225 | 1.7109 | 1.4723 | 0.8255 | 1.3328 | 0.1870 |
| CYP2J2     | 0.9854 | 2.0654 | 1.4800 | 0.8100 | 1.3352 | 0.2817 |
| LOC1001311 | 1.2459 | 1.8962 | 1.4024 | 0.7972 | 1.3354 | 0.2267 |
| PEX11G     | 1.3832 | 1.9523 | 1.1655 | 0.8429 | 1.3360 | 0.2335 |
| TBC1D9B    | 1.4523 | 1.9299 | 1.1393 | 0.8235 | 1.3363 | 0.2358 |
| RFX7       | 1.2618 | 1.9574 | 1.2854 | 0.8418 | 1.3366 | 0.2307 |



|            |        |        |        |        |        |        |
|------------|--------|--------|--------|--------|--------|--------|
| ANXA1      | 1.4662 | 1.4854 | 1.5269 | 0.8710 | 1.3374 | 0.1560 |
| NAT1       | 1.4310 | 1.8062 | 1.3709 | 0.7478 | 1.3390 | 0.2193 |
| PIK3CD     | 1.5513 | 1.8150 | 1.1022 | 0.8878 | 1.3391 | 0.2104 |
| STEAP2     | 1.2349 | 1.8921 | 1.3472 | 0.8887 | 1.3407 | 0.2081 |
| PRMT10     | 1.4166 | 1.7486 | 1.4296 | 0.7705 | 1.3413 | 0.2052 |
| LOC92249   | 1.3493 | 1.8863 | 1.2765 | 0.8543 | 1.3416 | 0.2118 |
| KAT2B      | 1.2093 | 1.9940 | 1.3892 | 0.7766 | 1.3423 | 0.2524 |
| MTM1       | 1.2778 | 1.8840 | 1.2904 | 0.9210 | 1.3433 | 0.1995 |
| JUP        | 1.4389 | 1.8687 | 1.2712 | 0.7947 | 1.3434 | 0.2220 |
| NETO1      | 1.1576 | 1.8944 | 1.4779 | 0.8509 | 1.3452 | 0.2234 |
| DYNC1LI2   | 1.2250 | 2.2862 | 1.1397 | 0.7339 | 1.3462 | 0.3311 |
| LOC653297  | 1.3911 | 1.7400 | 1.4376 | 0.8164 | 1.3463 | 0.1928 |
| TERF2IP    | 1.3786 | 1.9784 | 1.3951 | 0.6329 | 1.3463 | 0.2757 |
| REEP5      | 1.4078 | 1.8296 | 1.3559 | 0.7932 | 1.3466 | 0.2128 |
| LOC730525  | 1.0174 | 2.0517 | 1.4818 | 0.8395 | 1.3476 | 0.2709 |
| HIST2H2AC  | 1.4717 | 1.7676 | 1.3377 | 0.8145 | 1.3479 | 0.1992 |
| VCY        | 1.3369 | 1.8787 | 1.2767 | 0.9050 | 1.3493 | 0.2006 |
| PCNX       | 1.1187 | 2.1195 | 1.3341 | 0.8258 | 1.3495 | 0.2770 |
| GANAB      | 1.2724 | 2.1545 | 1.1743 | 0.7991 | 1.3501 | 0.2869 |
| LCP1       | 1.5065 | 1.8085 | 1.4286 | 0.6630 | 1.3516 | 0.2437 |
| DKFZp761P0 | 1.3021 | 1.6729 | 1.5496 | 0.8826 | 1.3518 | 0.1744 |
| SSFA2      | 1.2147 | 2.1112 | 1.3087 | 0.7758 | 1.3526 | 0.2783 |
| NAMPT      | 1.1503 | 1.9870 | 1.3710 | 0.9035 | 1.3530 | 0.2319 |
| DUSP3      | 1.1293 | 2.2044 | 1.3254 | 0.7537 | 1.3532 | 0.3075 |
| TMEM116    | 0.9603 | 2.1023 | 1.6447 | 0.7067 | 1.3535 | 0.3187 |
| DUSP16     | 1.6577 | 1.6651 | 1.1639 | 0.9279 | 1.3536 | 0.1841 |
| SRPR       | 1.3324 | 1.9021 | 1.3140 | 0.8684 | 1.3542 | 0.2118 |
| IDH1       | 1.1607 | 2.0238 | 1.5270 | 0.7057 | 1.3543 | 0.2793 |
| PSAP       | 1.2873 | 1.9298 | 1.4139 | 0.7862 | 1.3543 | 0.2349 |
| LSS        | 1.3922 | 1.7888 | 1.3796 | 0.8569 | 1.3544 | 0.1911 |
| CANT1      | 1.6368 | 1.7714 | 1.1640 | 0.8490 | 1.3553 | 0.2132 |
| USP11      | 1.0396 | 1.9800 | 1.4507 | 0.9554 | 1.3564 | 0.2343 |
| TMEM175    | 1.2993 | 1.9411 | 1.2793 | 0.9101 | 1.3574 | 0.2141 |
| TACC1      | 1.1531 | 2.0000 | 1.4612 | 0.8154 | 1.3574 | 0.2515 |
| VCX-C      | 1.2386 | 2.0200 | 1.3148 | 0.8588 | 1.3581 | 0.2421 |
| PFTK1      | 1.4041 | 1.8270 | 1.2697 | 0.9329 | 1.3584 | 0.1850 |
| DNASE1     | 1.2551 | 1.8613 | 1.4889 | 0.8299 | 1.3588 | 0.2160 |
| ZNF33B     | 1.4031 | 1.8853 | 1.2584 | 0.8914 | 1.3596 | 0.2057 |
| ARID5B     | 1.2566 | 1.9785 | 1.3858 | 0.8218 | 1.3607 | 0.2387 |
| FLJ39632   | 1.3706 | 1.8932 | 1.2177 | 0.9718 | 1.3633 | 0.1948 |
| TBC1D9     | 1.1116 | 1.9279 | 1.5814 | 0.8325 | 1.3634 | 0.2435 |
| MLEC       | 1.3895 | 1.9822 | 1.2608 | 0.8235 | 1.3640 | 0.2390 |
| ZNF615     | 1.5253 | 1.7923 | 1.2302 | 0.9121 | 1.3650 | 0.1896 |
| ACTA2      | 0.9024 | 1.9000 | 1.6173 | 1.0405 | 1.3650 | 0.2361 |
| LIMCH1     | 1.0415 | 2.2807 | 1.3434 | 0.7948 | 1.3651 | 0.3252 |
| TMEM106B   | 1.3456 | 1.8261 | 1.4281 | 0.8654 | 1.3663 | 0.1972 |

|            |        |        |        |        |        |        |
|------------|--------|--------|--------|--------|--------|--------|
| LOC441461  | 1.4162 | 1.8037 | 1.3907 | 0.8546 | 1.3663 | 0.1950 |
| KIAA1191   | 1.2797 | 2.0818 | 1.3575 | 0.7594 | 1.3696 | 0.2720 |
| RAB5A      | 1.4144 | 1.7925 | 1.4285 | 0.8451 | 1.3701 | 0.1957 |
| RTN1       | 1.4404 | 1.6457 | 1.5132 | 0.8840 | 1.3708 | 0.1677 |
| RABL4      | 1.4897 | 2.0437 | 1.2537 | 0.7092 | 1.3741 | 0.2766 |
| CPE        | 1.4304 | 1.6969 | 1.5515 | 0.8175 | 1.3741 | 0.1933 |
| LOC1001305 | 0.9200 | 1.9061 | 1.9445 | 0.7261 | 1.3742 | 0.3207 |
| HIPK2      | 1.2890 | 1.8758 | 1.3290 | 1.0093 | 1.3758 | 0.1812 |
| PEX11A     | 1.5347 | 1.7707 | 1.4229 | 0.7809 | 1.3773 | 0.2116 |
| CCDC92     | 1.5112 | 1.8142 | 1.1533 | 1.0317 | 1.3776 | 0.1776 |
| ZSCAN18    | 1.3920 | 1.9751 | 1.3091 | 0.8421 | 1.3796 | 0.2325 |
| HADHB      | 1.3823 | 1.9947 | 1.3690 | 0.7761 | 1.3805 | 0.2488 |
| CHST14     | 1.3616 | 1.7803 | 1.4887 | 0.8940 | 1.3811 | 0.1845 |
| HIST1H2BC  | 1.3650 | 1.4640 | 1.8679 | 0.8346 | 1.3829 | 0.2127 |
| AR         | 1.3637 | 1.8781 | 1.4379 | 0.8534 | 1.3833 | 0.2100 |
| DENND5A    | 1.5404 | 1.9708 | 1.1716 | 0.8519 | 1.3837 | 0.2410 |
| TSPYL1     | 1.8450 | 1.5783 | 1.3127 | 0.8046 | 1.3852 | 0.2219 |
| LOC651198  | 1.3316 | 2.0418 | 1.3532 | 0.8169 | 1.3859 | 0.2513 |
| BCL2L1     | 1.6145 | 1.8643 | 1.2369 | 0.8307 | 1.3866 | 0.2258 |
| HTT        | 1.5346 | 1.7235 | 1.3320 | 0.9610 | 1.3878 | 0.1632 |
| EAF2       | 1.7139 | 1.5783 | 1.4119 | 0.8502 | 1.3886 | 0.1898 |
| VCX2       | 1.4622 | 1.9655 | 1.3348 | 0.8074 | 1.3925 | 0.2379 |
| TUFT1      | 1.3423 | 1.9697 | 1.3501 | 0.9099 | 1.3930 | 0.2180 |
| TARP       | 1.5378 | 1.9777 | 1.1532 | 0.9038 | 1.3931 | 0.2345 |
| DEFB126    | 1.4666 | 1.6346 | 1.5318 | 0.9415 | 1.3936 | 0.1546 |
| SOX8       | 1.0912 | 2.1655 | 1.3623 | 0.9597 | 1.3947 | 0.2703 |
| KRT8       | 1.4217 | 2.0876 | 1.2501 | 0.8239 | 1.3958 | 0.2626 |
| LAMC1      | 1.2038 | 2.0501 | 1.5706 | 0.7592 | 1.3959 | 0.2740 |
| TMEM184B   | 1.5283 | 1.8886 | 1.2242 | 0.9494 | 1.3976 | 0.2019 |
| TMEM54     | 1.4177 | 2.1198 | 1.3076 | 0.7456 | 1.3976 | 0.2821 |
| PCNXL3     | 1.4842 | 1.8105 | 1.3734 | 0.9265 | 1.3987 | 0.1827 |
| NLGN4X     | 1.3752 | 1.8341 | 1.5252 | 0.8620 | 1.3991 | 0.2029 |
| LOC644743  | 1.2865 | 2.1200 | 1.2786 | 0.9124 | 1.3994 | 0.2556 |
| CYP1A2     | 1.2443 | 1.6855 | 1.8026 | 0.8662 | 1.3996 | 0.2146 |
| CTSB       | 1.4403 | 1.9280 | 1.3359 | 0.8946 | 1.3997 | 0.2121 |
| HMGCS1     | 1.4619 | 1.9301 | 1.3538 | 0.8540 | 1.4000 | 0.2208 |
| MB         | 1.2883 | 2.1630 | 1.3563 | 0.8106 | 1.4045 | 0.2804 |
| WWC1       | 1.3465 | 2.2040 | 1.3114 | 0.7590 | 1.4052 | 0.2983 |
| RHBDF1     | 1.2749 | 2.0752 | 1.3491 | 0.9294 | 1.4071 | 0.2407 |
| HIST2H2AA3 | 1.1602 | 2.2253 | 1.4497 | 0.7969 | 1.4080 | 0.3034 |
| C10orf33   | 1.5876 | 1.8189 | 1.3307 | 0.9045 | 1.4104 | 0.1959 |
| MGP        | 1.2065 | 1.7559 | 1.6963 | 0.9925 | 1.4128 | 0.1865 |
| CXADR      | 1.4102 | 2.0547 | 1.4572 | 0.7407 | 1.4157 | 0.2686 |
| PTGER4     | 1.5576 | 1.6943 | 1.5098 | 0.9140 | 1.4189 | 0.1728 |
| KIAA1598   | 1.4228 | 2.1525 | 1.2095 | 0.8916 | 1.4191 | 0.2677 |
| TAX1BP1    | 1.3224 | 2.1568 | 1.3834 | 0.8154 | 1.4195 | 0.2768 |

|           |        |        |        |        |        |        |
|-----------|--------|--------|--------|--------|--------|--------|
| SLPI      | 1.3312 | 2.1477 | 1.3658 | 0.8340 | 1.4197 | 0.2714 |
| LPPR2     | 1.5737 | 1.9478 | 1.2068 | 0.9513 | 1.4199 | 0.2174 |
| TWIST1    | 1.8994 | 1.7546 | 1.2431 | 0.7838 | 1.4202 | 0.2546 |
| ZNF75D    | 1.6634 | 1.7762 | 1.3132 | 0.9289 | 1.4204 | 0.1912 |
| INPP4B    | 1.5356 | 1.6091 | 1.6328 | 0.9075 | 1.4213 | 0.1725 |
| HIST1H2AE | 1.0531 | 2.5975 | 1.2781 | 0.7690 | 1.4244 | 0.4047 |
| FLJ10986  | 1.2841 | 1.9823 | 1.4343 | 0.9979 | 1.4247 | 0.2068 |
| DEFB32    | 1.6037 | 1.6601 | 1.4966 | 0.9461 | 1.4266 | 0.1637 |
| HSPA5     | 1.3924 | 1.9741 | 1.5592 | 0.7864 | 1.4280 | 0.2464 |
| CPEB4     | 0.8975 | 2.3899 | 1.4007 | 1.0286 | 1.4292 | 0.3375 |
| TP53INP2  | 1.8550 | 1.5468 | 1.2925 | 1.0244 | 1.4297 | 0.1774 |
| CALML4    | 1.5073 | 2.0560 | 1.3682 | 0.7974 | 1.4322 | 0.2585 |
| MXD4      | 1.6535 | 2.0756 | 1.1643 | 0.8378 | 1.4328 | 0.2720 |
| CLDN8     | 1.1319 | 2.0780 | 1.6612 | 0.8662 | 1.4343 | 0.2708 |
| ACSL3     | 1.2330 | 2.1638 | 1.5912 | 0.7555 | 1.4359 | 0.2969 |
| C15orf52  | 1.5722 | 2.1383 | 1.2200 | 0.8164 | 1.4367 | 0.2802 |
| C10orf65  | 1.5145 | 2.0553 | 1.3822 | 0.7970 | 1.4373 | 0.2583 |
| NAAA      | 1.4363 | 2.0726 | 1.3715 | 0.8750 | 1.4389 | 0.2456 |
| PIK3IP1   | 1.1902 | 2.2527 | 1.2643 | 1.0505 | 1.4394 | 0.2747 |
| TSPAN9    | 1.4296 | 2.1173 | 1.2493 | 0.9658 | 1.4405 | 0.2450 |
| SCOC      | 1.1927 | 1.9631 | 1.8771 | 0.7333 | 1.4415 | 0.2923 |
| PGAP3     | 1.4298 | 1.9006 | 1.4817 | 0.9550 | 1.4418 | 0.1935 |
| CYTA      | 1.5218 | 2.0204 | 1.4657 | 0.7847 | 1.4481 | 0.2539 |
| LOC728431 | 1.4230 | 2.0831 | 1.5538 | 0.7416 | 1.4504 | 0.2760 |
| TSPAN31   | 1.4449 | 1.9964 | 1.5922 | 0.7685 | 1.4505 | 0.2555 |
| LOC388481 | 1.5525 | 1.6739 | 1.5162 | 1.0612 | 1.4510 | 0.1342 |
| ID1       | 1.8145 | 1.6544 | 1.3713 | 0.9675 | 1.4519 | 0.1857 |
| LDLR      | 1.3047 | 2.1824 | 1.4257 | 0.8974 | 1.4525 | 0.2682 |
| LOC653631 | 1.0636 | 2.0251 | 2.1093 | 0.6150 | 1.4532 | 0.3665 |
| SGEF      | 1.4901 | 2.2824 | 1.3244 | 0.7201 | 1.4543 | 0.3218 |
| FLNB      | 1.6181 | 2.2884 | 1.0701 | 0.8440 | 1.4552 | 0.3218 |
| C6orf48   | 1.5120 | 2.1511 | 1.4276 | 0.7392 | 1.4575 | 0.2888 |
| LOC647954 | 1.4121 | 2.2269 | 1.2949 | 0.8967 | 1.4577 | 0.2791 |
| STAT2     | 1.4449 | 2.0734 | 1.4095 | 0.9036 | 1.4579 | 0.2395 |
| M160      | 1.7061 | 1.8837 | 1.4163 | 0.8314 | 1.4594 | 0.2304 |
| C1orf116  | 1.2264 | 2.4523 | 1.4511 | 0.7083 | 1.4595 | 0.3656 |
| RNF144B   | 1.1080 | 2.1850 | 1.6098 | 0.9401 | 1.4607 | 0.2802 |
| ZFH3      | 1.3879 | 2.4208 | 1.1690 | 0.8675 | 1.4613 | 0.3372 |
| DLG2      | 1.5673 | 1.8628 | 1.5418 | 0.8743 | 1.4615 | 0.2089 |
| GPR137B   | 1.2894 | 2.2551 | 1.5571 | 0.7535 | 1.4638 | 0.3122 |
| STX12     | 1.7399 | 1.7556 | 1.4670 | 0.8986 | 1.4653 | 0.2002 |
| TMEM41A   | 1.1364 | 2.4306 | 1.3957 | 0.9082 | 1.4677 | 0.3360 |
| LPXN      | 1.4576 | 2.0078 | 1.6418 | 0.7640 | 1.4678 | 0.2610 |
| RHO       | 1.6030 | 2.1104 | 1.3706 | 0.7960 | 1.4700 | 0.2726 |
| FAM13B    | 1.2608 | 2.2192 | 1.5388 | 0.8715 | 1.4726 | 0.2840 |
| RRAS      | 1.5575 | 2.1669 | 1.2719 | 0.8990 | 1.4738 | 0.2675 |

|            |        |        |        |        |        |        |
|------------|--------|--------|--------|--------|--------|--------|
| ENPP5      | 1.4281 | 1.8118 | 1.8905 | 0.7677 | 1.4745 | 0.2563 |
| TMC4       | 1.3543 | 2.1379 | 1.5676 | 0.8514 | 1.4778 | 0.2664 |
| C5orf41    | 1.2869 | 2.0209 | 1.7201 | 0.8845 | 1.4781 | 0.2487 |
| NR3C2      | 1.4150 | 1.8460 | 1.7997 | 0.8566 | 1.4793 | 0.2289 |
| TMSB4X     | 1.3898 | 2.0154 | 1.5367 | 0.9857 | 1.4819 | 0.2126 |
| FGFRL1     | 1.6871 | 1.9619 | 1.4656 | 0.8294 | 1.4860 | 0.2413 |
| LOC1001340 | 2.0610 | 1.6163 | 1.2145 | 1.0727 | 1.4911 | 0.2221 |
| PPIC       | 1.2515 | 2.1190 | 1.8090 | 0.7879 | 1.4918 | 0.2954 |
| MKNK2      | 1.3419 | 2.2713 | 1.5020 | 0.8618 | 1.4942 | 0.2926 |
| HMGCR      | 1.5784 | 2.0396 | 1.4811 | 0.8809 | 1.4950 | 0.2382 |
| B2M        | 1.3920 | 2.3033 | 1.5864 | 0.7015 | 1.4958 | 0.3294 |
| PGCP       | 1.4547 | 1.9532 | 1.5621 | 1.0175 | 1.4969 | 0.1924 |
| MYLIP      | 1.3495 | 2.0436 | 1.7507 | 0.8483 | 1.4980 | 0.2591 |
| KLK3       | 1.3611 | 2.2794 | 1.5365 | 0.8162 | 1.4983 | 0.3022 |
| HSD17B4    | 1.2878 | 2.5189 | 1.3764 | 0.8169 | 1.5000 | 0.3611 |
| AIDA       | 1.2919 | 2.2145 | 1.7399 | 0.7611 | 1.5018 | 0.3106 |
| TAX1BP3    | 1.2411 | 2.2419 | 1.6273 | 0.8988 | 1.5023 | 0.2880 |
| APP        | 1.4007 | 2.2431 | 1.4906 | 0.8763 | 1.5027 | 0.2815 |
| ERRFI1     | 1.4931 | 1.9530 | 1.7492 | 0.8168 | 1.5030 | 0.2473 |
| RASEF      | 1.2908 | 2.3745 | 1.4729 | 0.8905 | 1.5072 | 0.3136 |
| SV2C       | 1.5027 | 2.0462 | 1.3995 | 1.0911 | 1.5099 | 0.1990 |
| RPS6KA2    | 1.7640 | 1.9234 | 1.4346 | 0.9193 | 1.5103 | 0.2217 |
| ZFAND3     | 1.6955 | 1.9185 | 1.3731 | 1.0548 | 1.5105 | 0.1887 |
| SBDSP      | 1.3716 | 2.3512 | 1.5058 | 0.8209 | 1.5124 | 0.3164 |
| RAC1       | 1.7429 | 2.0676 | 1.3787 | 0.8669 | 1.5140 | 0.2575 |
| ODAM       | 1.4316 | 2.0282 | 1.6688 | 0.9374 | 1.5165 | 0.2287 |
| NISCH      | 1.5403 | 2.1312 | 1.5185 | 0.8873 | 1.5193 | 0.2540 |
| CROT       | 1.4568 | 2.3349 | 1.4211 | 0.8671 | 1.5200 | 0.3033 |
| HSPB8      | 1.5483 | 1.8567 | 1.8020 | 0.8761 | 1.5208 | 0.2251 |
| IGSF5      | 1.5069 | 1.8746 | 1.7635 | 0.9392 | 1.5211 | 0.2087 |
| ZBTB16     | 1.6770 | 2.0232 | 1.4372 | 0.9481 | 1.5214 | 0.2258 |
| LOC440157  | 1.9667 | 1.8742 | 1.2842 | 0.9621 | 1.5218 | 0.2401 |
| TNFRSF21   | 1.2452 | 2.5070 | 1.6705 | 0.6646 | 1.5218 | 0.3877 |
| GADD45A    | 1.4020 | 2.0588 | 1.7779 | 0.8617 | 1.5251 | 0.2589 |
| SEMA4A     | 1.5966 | 2.2555 | 1.4620 | 0.8180 | 1.5330 | 0.2947 |
| SSBP2      | 1.5402 | 1.9597 | 1.7631 | 0.8829 | 1.5365 | 0.2341 |
| MAN2B1     | 1.8042 | 2.0277 | 1.4157 | 0.9094 | 1.5393 | 0.2451 |
| GSTT1      | 1.5957 | 2.3604 | 1.2353 | 0.9867 | 1.5445 | 0.2993 |
| CEL        | 1.3762 | 2.0759 | 1.8840 | 0.8539 | 1.5475 | 0.2743 |
| TP53AP1    | 1.4622 | 2.2757 | 1.4529 | 0.9998 | 1.5476 | 0.2656 |
| WDR22      | 1.4093 | 2.2558 | 1.7028 | 0.8407 | 1.5521 | 0.2950 |
| OSBP       | 1.5687 | 2.5092 | 1.2770 | 0.8592 | 1.5535 | 0.3502 |
| SIDT2      | 1.5719 | 2.2343 | 1.5500 | 0.8881 | 1.5611 | 0.2748 |
| SEMG1      | 1.3421 | 2.1368 | 1.8128 | 0.9526 | 1.5611 | 0.2603 |
| EEF2K      | 1.7043 | 2.2652 | 1.5331 | 0.7576 | 1.5650 | 0.3112 |
| IGFBP3     | 2.1272 | 1.9329 | 1.4249 | 0.7787 | 1.5659 | 0.3013 |

|            |        |        |        |        |        |        |
|------------|--------|--------|--------|--------|--------|--------|
| ALDH1A3    | 1.4653 | 2.4122 | 1.4837 | 0.9207 | 1.5705 | 0.3095 |
| CYR61      | 1.6286 | 2.1365 | 1.4463 | 1.0706 | 1.5705 | 0.2216 |
| SLC4A4     | 1.5529 | 2.3830 | 1.4948 | 0.8695 | 1.5750 | 0.3106 |
| LIN7B      | 1.9741 | 1.9835 | 1.3218 | 1.0329 | 1.5781 | 0.2388 |
| ADRB2      | 1.6300 | 2.4639 | 1.5272 | 0.6941 | 1.5788 | 0.3619 |
| HIST1H2BG  | 1.5810 | 2.1677 | 1.8099 | 0.7643 | 1.5807 | 0.2977 |
| PPP1R14C   | 1.3948 | 2.2491 | 1.7480 | 0.9434 | 1.5838 | 0.2762 |
| PTPRM      | 2.0127 | 2.1463 | 1.2749 | 0.9065 | 1.5851 | 0.2965 |
| IL1RAPL1   | 1.5719 | 2.2869 | 1.6336 | 0.8534 | 1.5864 | 0.2930 |
| PLEKHB1    | 1.5180 | 2.3289 | 1.5444 | 0.9582 | 1.5874 | 0.2817 |
| KCNN2      | 1.7675 | 2.4034 | 1.3559 | 0.8232 | 1.5875 | 0.3337 |
| HIST2H2BE  | 1.7173 | 2.2526 | 1.4761 | 0.9164 | 1.5906 | 0.2772 |
| SCGB1D2    | 1.3890 | 2.1238 | 1.9784 | 0.9391 | 1.6076 | 0.2737 |
| LOC729384  | 2.3638 | 1.9397 | 1.2939 | 0.8726 | 1.6175 | 0.3317 |
| C21orf122  | 1.6723 | 2.3166 | 1.6201 | 0.8752 | 1.6210 | 0.2948 |
| LOC1001341 | 1.8323 | 1.8805 | 1.7678 | 1.0041 | 1.6212 | 0.2070 |
| SEPP1      | 1.3520 | 2.6848 | 1.5329 | 0.9179 | 1.6219 | 0.3771 |
| HPGD       | 1.8424 | 2.0751 | 1.5439 | 1.0525 | 1.6285 | 0.2206 |
| SNORD13    | 1.1576 | 1.8011 | 2.7048 | 0.8543 | 1.6295 | 0.4092 |
| FOXD4L1    | 1.9401 | 2.1708 | 1.5432 | 0.8858 | 1.6350 | 0.2814 |
| SECISBP2L  | 1.6266 | 2.5031 | 1.5267 | 0.8986 | 1.6388 | 0.3301 |
| HOPX       | 1.7266 | 2.0159 | 1.8678 | 1.0039 | 1.6535 | 0.2245 |
| DNAJC12    | 1.5021 | 2.6013 | 1.6108 | 0.9189 | 1.6583 | 0.3491 |
| HIST1H4H   | 1.5214 | 2.5000 | 1.6943 | 0.9214 | 1.6593 | 0.3255 |
| FNBP1      | 1.9319 | 2.2253 | 1.5568 | 0.9438 | 1.6644 | 0.2764 |
| BTG2       | 1.7978 | 2.4249 | 1.5113 | 0.9323 | 1.6666 | 0.3103 |
| ACAA1      | 1.8059 | 2.4879 | 1.4743 | 0.9879 | 1.6890 | 0.3149 |
| FOXD4      | 2.0024 | 2.2783 | 1.6203 | 0.8993 | 1.7001 | 0.2991 |
| SAT1       | 1.6296 | 2.4611 | 1.9502 | 0.7847 | 1.7064 | 0.3517 |
| COX7B2     | 1.7590 | 2.4486 | 1.7104 | 0.9082 | 1.7065 | 0.3150 |
| MCCC1      | 1.7670 | 2.5606 | 1.6571 | 0.8560 | 1.7102 | 0.3487 |
| EPHX2      | 1.9594 | 2.3345 | 1.7024 | 0.8831 | 1.7198 | 0.3076 |
| LOC399939  | 2.8282 | 1.7742 | 1.2108 | 1.0997 | 1.7282 | 0.3953 |
| LEPREL1    | 1.6834 | 2.5956 | 1.7038 | 0.9747 | 1.7394 | 0.3319 |
| KRT19      | 2.1306 | 2.1798 | 1.6579 | 0.9984 | 1.7417 | 0.2743 |
| TRIM48     | 2.8624 | 1.8719 | 1.2769 | 0.9652 | 1.7441 | 0.4175 |
| COL4A5     | 1.8819 | 2.5041 | 1.6205 | 0.9701 | 1.7442 | 0.3177 |
| TRPM8      | 1.8443 | 2.1030 | 2.1821 | 0.8800 | 1.7524 | 0.2996 |
| CAPRN2     | 1.4876 | 2.7589 | 1.8888 | 0.8989 | 1.7586 | 0.3905 |
| SPOCK1     | 2.5670 | 2.1704 | 1.3055 | 1.0061 | 1.7623 | 0.3645 |
| PRAGMIN    | 1.2864 | 2.8171 | 2.0985 | 0.8563 | 1.7646 | 0.4352 |
| PMEP1A     | 2.0816 | 2.5849 | 1.4614 | 0.9531 | 1.7702 | 0.3563 |
| VWF        | 1.7173 | 2.2793 | 2.0418 | 1.0803 | 1.7797 | 0.2600 |
| CALD1      | 1.4931 | 2.6626 | 2.1097 | 0.8544 | 1.7799 | 0.3902 |
| KLK2       | 1.8700 | 2.3739 | 1.8705 | 1.0539 | 1.7921 | 0.2732 |
| FAM107A    | 1.7778 | 2.4358 | 1.8179 | 1.1508 | 1.7956 | 0.2624 |

|            |        |        |        |        |        |        |
|------------|--------|--------|--------|--------|--------|--------|
| SDC2       | 1.4198 | 2.2636 | 2.7362 | 0.7759 | 1.7989 | 0.4364 |
| MPP5       | 1.5295 | 3.2151 | 1.6983 | 0.7966 | 1.8099 | 0.5077 |
| TMEM79     | 2.3176 | 2.4165 | 1.5262 | 0.9831 | 1.8108 | 0.3403 |
| C21orf100  | 1.9270 | 2.2015 | 2.0487 | 1.1121 | 1.8223 | 0.2433 |
| NCRNA00161 | 1.8672 | 2.4101 | 2.1368 | 0.9449 | 1.8398 | 0.3182 |
| LOC642299  | 1.8354 | 2.7775 | 1.9073 | 0.8483 | 1.8421 | 0.3944 |
| PGC        | 2.1066 | 2.5298 | 1.7865 | 0.9971 | 1.8550 | 0.3239 |
| ALCAM      | 2.0913 | 2.2536 | 2.2957 | 0.8734 | 1.8785 | 0.3379 |
| APOD       | 1.7717 | 2.4912 | 2.2697 | 1.0106 | 1.8858 | 0.3282 |
| TMEFF2     | 1.9358 | 2.8844 | 1.7996 | 0.9532 | 1.8932 | 0.3955 |
| STX19      | 1.8614 | 2.7995 | 2.1491 | 0.8439 | 1.9135 | 0.4070 |
| ID3        | 2.1842 | 2.6540 | 1.7681 | 1.1547 | 1.9403 | 0.3183 |
| GPNMB      | 1.7043 | 2.7643 | 2.4160 | 0.9323 | 1.9542 | 0.4058 |
| FLJ41484   | 1.9950 | 2.6938 | 1.9917 | 1.1783 | 1.9647 | 0.3098 |
| HIST1H2BD  | 2.0176 | 2.8496 | 2.1885 | 0.9506 | 2.0016 | 0.3936 |
| CDKN1A     | 1.8164 | 3.1186 | 2.3934 | 0.7553 | 2.0209 | 0.4989 |
| TMPRSS2    | 1.9671 | 3.1857 | 2.0480 | 0.9911 | 2.0480 | 0.4489 |
| TSPAN8     | 1.4250 | 3.2360 | 2.8035 | 0.9442 | 2.1022 | 0.5460 |
| CAMK2N1    | 2.3482 | 3.5200 | 1.7092 | 0.8642 | 2.1104 | 0.5596 |
| EFNB2      | 2.0914 | 2.8867 | 2.5637 | 1.0793 | 2.1553 | 0.3941 |
| SPRYD5     | 3.8483 | 2.5390 | 1.7083 | 0.9921 | 2.2719 | 0.6132 |
| C5orf46    | 2.7073 | 3.2646 | 2.3299 | 1.0841 | 2.3465 | 0.4625 |
| SYT4       | 2.7547 | 3.2573 | 2.4953 | 1.0172 | 2.3811 | 0.4814 |
| ADAMTS1    | 2.4987 | 3.7022 | 2.6415 | 0.9675 | 2.4525 | 0.5631 |
| BTG1       | 2.5436 | 3.7808 | 2.4868 | 1.0068 | 2.4545 | 0.5674 |
| RNF160     | 2.1061 | 3.8888 | 3.2994 | 0.9305 | 2.5562 | 0.6566 |
| TMEM140    | 2.2434 | 4.2210 | 2.8265 | 1.0189 | 2.5775 | 0.6648 |
| PLA2G2A    | 2.5669 | 4.2657 | 2.9508 | 0.9386 | 2.6805 | 0.6852 |

---

**Table S4:** Characteristics of prostate, breast, and ovarian cancer cell lines used.

| Cell line | Origin       | Androgen/estrogen status | AR status                                                                              | AR variants | p53 status | Other                                                                        |
|-----------|--------------|--------------------------|----------------------------------------------------------------------------------------|-------------|------------|------------------------------------------------------------------------------|
| LNCaP     | Prostate     | sensitive                | T877A mutant                                                                           | Absent      | Wild-type  |                                                                              |
| LNCaP-AI  | Prostate     | independent              | T877A mutant                                                                           | Absent      | Wild-type  |                                                                              |
| CWR22Rv1  | Prostate     | independent              | Exon 3 duplication (ZnF <sub>2</sub> DNA-binding domain), H874Y (lower AR specificity) | Present     | Mutant     |                                                                              |
| PC3       | Prostate     | independent              | Negative                                                                               | Absent      | Null       |                                                                              |
| MCF7      | Breast       | sensitive                | Positive                                                                               | Absent      | Wild-type  |                                                                              |
| MX-1      | Breast       |                          |                                                                                        |             | Wild-type  | BRCA1 <sup>mut</sup> , ER <sup>-</sup> , PR <sup>-</sup> , HER2 <sup>-</sup> |
| PEO1      | Ovarian      |                          |                                                                                        |             | Mutant     | BRCA2 <sup>+</sup> , ER <sup>+</sup>                                         |
| PEO4      | Ovarian      |                          |                                                                                        |             | Mutant     | BRCA2 <sup>+</sup> , ER <sup>+</sup>                                         |
| U2OS      | Osteosarcoma |                          |                                                                                        |             | Wild-type  |                                                                              |
